# Supplementary material for: Multiple P-TEFbs cooperatively regulate the release of promoter-proximally paused RNA polymerase II
Source: PubMed Central journal article supplement — Nucleic Acids Res. 2016 Jun 28;44(14):6853–67. doi: 10.1093/nar/gkw571 (PMC5001612; doi:10.1093/nar/gkw571), 2016-06-28
Supplement: supp_gkw571_nar-00736-v-2016-File011.pdf [file supp_gkw571_nar-00736-v-2016-File011.pdf]

**Table S1. Pol II ChIP-Seq Data. Related to Figure 1D**  
**Sheet1: Pausing genes in untreated HCT116 cells expressing shGFP**

| Symbol       | Gene ID      | Promoter RPK | Gene Body RPK | pValue      | Pause Ratio(TR) |
|--------------|--------------|--------------|---------------|-------------|-----------------|
| MRPS12       | NM_021107    | 84.18275656  | 7.441494649   | 4.04E-06    | 11.312614       |
| APTX         | NR_036579    | 93.01930787  | 3.784005525   | 1.43E-08    | 24.58223363     |
| HFE          | NM_139008    | 57.40797988  | 2.668950296   | 1.52E-05    | 21.5095725      |
| MEST         | NM_001253902 | 36.40669621  | 1.391469749   | 0.001050046 | 26.16420245     |
| PLD3         | NM_001031696 | 61.59073644  | 3.368762882   | 4.26E-06    | 18.28289452     |
| NUDT15       | NM_018283    | 113.2844306  | 7.160702583   | 1.16E-09    | 15.82029547     |
| TRMT1        | NM_017722    | 38.46847084  | 0.421534709   | 0.000138712 | 91.25813366     |
| CALU         | NM_001199672 | 126.2445312  | 1.80957936    | 6.79E-14    | 69.76457293     |
| NUDT4        | NM_001301022 | 35.34620525  | 2.526091451   | 0.0034087   | 13.99244878     |
| AGFG1        | NM_004504    | 40           | 1.464170913   | 0.001144168 | 27.31921502     |
| TMEM222      | NM_032125    | 85.24324752  | 6.832840081   | 5.85E-07    | 12.47552211     |
| MGST1        | NM_001260512 | 131.6936942  | 2.055436536   | 1.14E-14    | 64.07091237     |
| C2orf72      | NM_001144994 | 40.26512274  | 1.098407632   | 0.00021316  | 36.65772303     |
| CHCHD3       | NM_017812    | 106.7747767  | 0.728532603   | 1.45E-11    | 146.5614253     |
| OCIAD1       | NM_001079840 | 38.46847084  | 1.27986976    | 0.001358274 | 30.0565511      |
| MIB2         | NM_001170689 | 98.2033481   | 23.73607449   | 0.000183274 | 4.13730367      |
| MUTYH        | NM_001293190 | 130.162165   | 11.220703     | 4.22E-10    | 11.60017915     |
| TRMT1L       | NM_001202423 | 69.10167405  | 1.111908353   | 3.28E-07    | 62.14691514     |
| ENSA         | NM_207044    | 141.3256137  | 2.724169725   | 8.49E-16    | 51.87841728     |
| RBM10        | NM_001204466 | 86.24453119  | 2.246286662   | 1.17E-08    | 38.3942676      |
| AFF4         | NM_014423    | 140.7953682  | 1.8059709     | 2.91E-14    | 77.96103926     |
| WRNIP1       | NM_020135    | 104.4478793  | 3.912008829   | 4.00E-10    | 26.69929539     |
| HMGN3        | NM_001201363 | 98.99871632  | 3.753832251   | 4.39E-09    | 26.37270653     |
| SYT17        | NM_016524    | 38.46847084  | 0.995336072   | 0.000275271 | 38.64872571     |
| PUF60        | NM_078480    | 123.6525111  | 5.724421866   | 2.65E-11    | 21.60087324     |
| EPT1         | NM_033505    | 132.7541851  | 1.566537523   | 3.33E-14    | 84.7436995      |
| CHST7        | NM_019886    | 111.9588169  | 3.470687693   | 1.09E-10    | 32.25839569     |
| AP1S1        | NM_001283    | 57.93822536  | 7.457147621   | 0.000241794 | 7.769488859     |
| TAF1C        | NM_139353    | 138.4684708  | 1.759804171   | 2.47E-17    | 78.68402243     |
| IDNK         | NR_046422    | 90.95753323  | 3.941058578   | 1.86E-08    | 23.07946746     |
| YY1AP1       | NM_001198906 | 95.34620525  | 2.934865926   | 1.07E-09    | 32.48741429     |
| CLPTM1       | NM_001282175 | 58.46847084  | 2.523940458   | 1.69E-05    | 23.16555078     |
| FDXR         | NM_024417    | 223.9176338  | 10.72034558   | 1.60E-19    | 20.88716564     |
| GORAB        | NR_027397    | 75.34620525  | 0.62168223    | 2.74E-09    | 121.197296      |
| ST3GAL3      | NR_073021    | 103.6525111  | 0.37498846    | 5.83E-12    | 276.4152026     |
| ATP5G3       | NM_001689    | 141.060491   | 9.083104557   | 9.46E-12    | 15.52998648     |
| GUSB         | NM_000181    | 73.01930787  | 2.456613159   | 9.41E-08    | 29.72356784     |
| PDCD6        | NR_073609    | 103.6525111  | 6.780542405   | 1.68E-08    | 15.28675803     |
| GMD5         | NM_001500    | 86.24453119  | 0.32443577    | 1.99E-09    | 265.8292924     |
| ARNTL2       | NM_001248005 | 83.1222656   | 1.232302705   | 3.25E-08    | 67.45279814     |
| CXorf40B     | NM_001013845 | 37.93822536  | 1.90523904    | 0.000413933 | 19.91258029     |
| CPSF3L       | NM_001256460 | 81.06049096  | 7.098695419   | 2.16E-06    | 11.41906874     |
| GSTT2B       | NM_001080843 | 230.6924105  | 37.19987461   | 3.18E-12    | 6.201429787     |
| GRTP1        | NM_024719    | 98.73359358  | 2.265693784   | 2.58E-10    | 43.57764242     |
| NPM1         | NM_002520    | 77.67310262  | 10.5959429    | 3.62E-05    | 7.33045689      |
| CD320        | NM_016579    | 158.4684708  | 12.30552739   | 3.15E-12    | 12.87782846     |
| GPR126       | NM_001032394 | 77.93822536  | 0.698447084   | 8.59E-09    | 111.5878742     |
| FERMT2       | NM_001134999 | 131.4285714  | 1.214492767   | 1.11E-13    | 108.2168417     |
| ZNF384       | NM_001135734 | 47.03989941  | 5.163573136   | 0.001406534 | 9.109951225     |
| RAE1         | NM_003610    | 53.01930787  | 2.817904621   | 2.89E-05    | 18.81515345     |
| GAB1         | NM_207123    | 60.79536822  | 0.066621036   | 9.48E-09    | 912.5551307     |
| LIPT1        | NM_001204830 | 157.4079799  | 2.159800483   | 3.73E-19    | 72.8807967      |
| DYX1C1-CCPG1 | NR_037923    | 41.06049096  | 0.052269452   | 8.23E-06    | 785.5542625     |
| PIEZO1       | NM_001142864 | 101.5907364  | 5.047444369   | 6.79E-09    | 20.12716318     |
| PLSCR3       | NM_020360    | 200.5302455  | 13.79510628   | 5.18E-16    | 14.53633205     |
| WTAP         | NM_001270531 | 116.1415735  | 2.010255182   | 6.29E-13    | 57.7745425      |
| STK10        | NM_005990    | 104.1827566  | 2.174237357   | 7.03E-10    | 47.91691957     |
| GPRC5B       | NM_016235    | 94.81595977  | 1.484912873   | 1.36E-10    | 63.85287751     |
| CDC27        | NM_001293091 | 109.8970423  | 0.434542027   | 3.86E-14    | 252.903138      |
| SERF1A       | NM_021967    | 332.4890624  | 8.315760555   | 2.51E-32    | 39.98300097     |
| PRKAG1       | NM_002733    | 118.2033481  | 6.376115292   | 3.01E-10    | 18.5384584      |

|            |              |             |             |             |             |
|------------|--------------|-------------|-------------|-------------|-------------|
| STXBP2     | NR_073560    | 54.81595977 | 4.189582617 | 0.000101435 | 13.0838713  |
| MYO1C      | NM_001080950 | 43.1222656  | 3.443636294 | 0.000470592 | 12.52230547 |
| PHF7       | NM_016483    | 134.550837  | 5.434661898 | 1.00E-12    | 24.75790391 |
| ELP4       | NM_001288725 | 95.34620525 | 0.082543665 | 1.26E-12    | 1155.100219 |
| ZNF281     | NM_001281293 | 83.1222656  | 3.40511154  | 2.01E-08    | 24.41102578 |
| TUBD1      | NM_001193612 | 42.12098192 | 3.984611577 | 0.002679104 | 10.5709129  |
| FIS1       | NM_016068    | 90.16216501 | 4.501722907 | 4.57E-09    | 20.02836845 |
| FN1        | NM_212476    | 25.71428571 | 0.765154883 | 0.004370597 | 33.60664133 |
| ITPR2      | NM_002223    | 163.6525111 | 0.353925964 | 4.64E-18    | 462.3919339 |
| FAM200B    | NM_001145191 | 158.7335936 | 2.747010607 | 1.06E-18    | 57.7841211  |
| SLC43A3    | NM_199329    | 92.22393965 | 1.357829186 | 1.07E-10    | 67.92013355 |
| COX10-AS1  | NR_049718    | 107.0398994 | 1.081801193 | 6.67E-12    | 98.9459987  |
| ADIPOR1    | NM_001290629 | 74.81595977 | 4.155857393 | 1.22E-06    | 18.00253298 |
| PRIMPOL    | NM_152683    | 48.57142857 | 0.807923643 | 6.28E-06    | 60.11883547 |
| MMP24-AS1  | NR_102706    | 112.2239396 | 20.18573899 | 1.65E-05    | 5.559565578 |
| ALG9       | NM_001077691 | 87.83526763 | 0.531907208 | 7.94E-11    | 165.1326892 |
| CCNB2      | NM_004701    | 95.08108251 | 3.58738385  | 6.67E-09    | 26.50429575 |
| SERTAD1    | NM_013376    | 98.73359358 | 13.22980079 | 3.44E-06    | 7.462969031 |
| ANAPC11    | NM_016476    | 128.3655131 | 11.08869737 | 4.30E-10    | 11.57624821 |
| OGT        | NM_181673    | 66.24453119 | 2.751460594 | 2.40E-06    | 24.07613299 |
| NEDD4L     | NM_015277    | 46.24453119 | 1.401240072 | 0.00039986  | 33.00257544 |
| PPIP5K1    | NM_001130859 | 52.48906239 | 2.130916269 | 7.68E-05    | 24.6321562  |
| PLAGL1     | NM_001289049 | 67.03989941 | 0.749087393 | 7.42E-08    | 89.49543137 |
| MOCS2      | NM_176806    | 134.550837  | 2.181092381 | 2.40E-15    | 61.68965523 |
| TDP1       | NM_001008744 | 177.4079799 | 0.908898371 | 8.47E-20    | 195.1901175 |
| TOMM34     | NM_006809    | 147.3050222 | 6.597754206 | 1.51E-13    | 22.32653984 |
| FAS        | NR_028036    | 64.18275656 | 2.521433873 | 2.70E-06    | 25.45486409 |
| CDC25C     | NM_001287582 | 41.85585918 | 0.157492308 | 2.92E-06    | 265.7644665 |
| CLYBL      | NR_104592    | 204.4478793 | 0.519364231 | 3.39E-23    | 393.6502882 |
| ZNF559     | NM_001202407 | 36.14157347 | 0.39894394  | 2.84E-05    | 90.59311299 |
| ATF2       | NR_045768    | 83.65251108 | 0.915613233 | 1.52E-09    | 91.36227835 |
| POMT1      | NM_007171    | 97.40797988 | 3.10781287  | 2.47E-09    | 31.342936   |
| TPM4       | NM_001145160 | 123.9176338 | 7.618727296 | 3.84E-10    | 16.26487325 |
| CCT8       | NM_001282909 | 80.79536822 | 1.776835324 | 5.67E-09    | 45.47150043 |
| RPAIN      | NR_027685    | 101.060491  | 9.77497312  | 1.49E-07    | 10.33869758 |
| BIRC6      | NM_016252    | 107.3050222 | 1.045363271 | 9.30E-12    | 102.6485482 |
| NDC1       | NM_018087    | 118.7335936 | 1.326593863 | 1.50E-12    | 89.50259522 |
| MRPS18C    | NM_001297767 | 95.87645073 | 3.111070879 | 2.50E-10    | 30.81782912 |
| COL4A5     | NM_000495    | 26.24453119 | 0.072170457 | 0.002764992 | 363.6464611 |
| PTAFR      | NM_001164721 | 43.38738834 | 0.145208646 | 2.92E-06    | 298.7934221 |
| ERGIC3     | NM_198398    | 98.73359358 | 2.969090098 | 4.59E-10    | 33.25382199 |
| CTSL       | NM_145918    | 127.5701449 | 2.126551656 | 5.61E-15    | 59.98920577 |
| YIPF1      | NR_036640    | 64.97812478 | 0.981803964 | 5.64E-07    | 66.18238177 |
| NR1H3      | NM_001251934 | 75.08108251 | 7.312938421 | 1.26E-05    | 10.26688291 |
| ACAD9      | NR_033426    | 54.07979883 | 2.482156597 | 3.09E-05    | 21.78742425 |
| HDAC11-AS1 | NR_046690    | 127.0398994 | 7.196131746 | 5.55E-11    | 17.65391517 |
| LINC00909  | NR_024484    | 67.03989941 | 8.822293676 | 0.000124277 | 7.598919496 |
| CHDH       | NM_018397    | 124.1827566 | 2.73935013  | 4.19E-13    | 45.33292594 |
| TCEB1      | NM_001204857 | 110.162165  | 4.840486535 | 2.74E-10    | 22.75849012 |
| KPNA3      | NM_002267    | 100.5302455 | 0.757310871 | 8.54E-12    | 132.7463387 |
| ARL4A      | NM_001195396 | 80.53024548 | 14.81870417 | 0.000144047 | 5.434364879 |
| RFXANK     | NM_001278727 | 121.8558592 | 9.217939045 | 1.39E-09    | 13.21942558 |
| PRADC1     | NM_032319    | 69.89704227 | 5.755921121 | 5.89E-06    | 12.14350246 |
| GALNT18    | NM_198516    | 131.222656  | 1.07700285  | 5.21E-14    | 121.8405837 |
| KDELR3     | NM_016657    | 135.0810825 | 7.042575663 | 1.84E-11    | 19.18063631 |
| TNPO3      | NM_012470    | 198.4684708 | 2.572883297 | 6.61E-20    | 77.13854377 |
| ATG5       | NM_004849    | 133.0193079 | 0.126172231 | 3.51E-19    | 1054.267697 |
| ZGPAT      | NM_181485    | 46.50965393 | 0.780702863 | 7.71E-06    | 59.5740789  |
| CFLAR      | NM_001202517 | 58.46847084 | 1.89590861  | 1.82E-05    | 30.83928758 |
| LOC644656  | NR_036539    | 104.4478793 | 12.01130108 | 6.46E-06    | 8.695800615 |
| AKAP1      | NM_003488    | 120.7953682 | 4.097787008 | 4.08E-11    | 29.47819591 |
| ZNF518A    | NM_014803    | 122.1209819 | 3.635294838 | 1.38E-11    | 33.59314371 |
| B4GALT4    | NM_003778    | 133.2844306 | 1.791003945 | 2.82E-15    | 74.41883697 |
| AGPAT9     | NM_032717    | 86.77477667 | 1.048336226 | 7.80E-09    | 82.77380342 |

|              |              |             |             |             |             |
|--------------|--------------|-------------|-------------|-------------|-------------|
| NUDT16P1     | NR_027766    | 103.1222656 | 11.98094436 | 1.02E-06    | 8.607190092 |
| LOC100507053 | NR_037884    | 186.5096539 | 0.483759357 | 1.05E-21    | 385.542215  |
| CENPBD1P1    | NR_026052    | 70.95753323 | 7.519872517 | 1.09E-05    | 9.436002149 |
| OGG1         | NM_016828    | 59.26383906 | 4.605868174 | 4.23E-05    | 12.86702894 |
| FGD5-AS1     | NR_046254    | 154.550837  | 1.488544981 | 3.93E-20    | 103.8267832 |
| PSMB3        | NR_104194    | 47.03989941 | 2.916084452 | 0.000125331 | 16.13118557 |
| TMEM9B       | NM_001286095 | 152.4890624 | 5.542163286 | 3.59E-14    | 27.51435757 |
| ZNF101       | NM_033204    | 95.87645073 | 2.158777383 | 2.99E-10    | 44.41238428 |
| LINC01128    | NR_047526    | 146.7747767 | 2.344362672 | 1.98E-16    | 62.60753867 |
| SCAMP5       | NM_001178111 | 66.50965393 | 1.153583551 | 3.77E-07    | 57.6548217  |
| UPF3B        | NM_080632    | 112.4890624 | 0.545782563 | 1.54E-15    | 206.1060028 |
| UBTD1        | NM_024954    | 84.4478793  | 2.162649517 | 2.28E-08    | 39.04834262 |
| SPCS2        | NM_014752    | 92.48906239 | 0.539277416 | 1.55E-11    | 171.5055361 |
| ALG13        | NM_001257230 | 74.55083703 | 0.563983442 | 4.94E-09    | 132.186216  |
| UBE2E1       | NM_182666    | 28.83655131 | 1.080772873 | 0.002365549 | 26.68141663 |
| CISH         | NM_013324    | 112.2239396 | 7.023905948 | 1.88E-09    | 15.9774263  |
| DCUN1D4      | NM_001287757 | 46.50965393 | 2.582276998 | 0.000341333 | 18.01110182 |
| NUDT1        | NM_198949    | 157.6731026 | 7.764069252 | 7.88E-14    | 20.30804949 |
| DDX12P       | NR_033399    | 121.3256137 | 4.946226002 | 4.19E-11    | 24.52892643 |
| ZNF324       | NM_014347    | 83.91763382 | 6.396065934 | 1.24E-06    | 13.12019524 |
| HOOK2        | NM_001100176 | 83.1222656  | 11.49959933 | 2.77E-05    | 7.228274934 |
| FXYD5        | NM_001164605 | 81.06049096 | 3.74351213  | 1.77E-07    | 21.65359378 |
| TMEM218      | NM_001258238 | 32.22393965 | 1.114098118 | 0.003700192 | 28.92378967 |
| DAG1         | NM_004393    | 123.3873883 | 2.485626649 | 2.32E-12    | 49.64035464 |
| VPS13C       | NM_017684    | 90.16216501 | 0.145494463 | 8.41E-12    | 619.6948201 |
| BOD1         | NM_001159651 | 31.69369417 | 2.731243239 | 0.004439356 | 11.60412728 |
| CCDC14       | NM_022757    | 131.9588169 | 1.457359439 | 2.12E-14    | 90.54651402 |
| CD109        | NM_133493    | 89.89704227 | 0.9089396   | 5.29E-10    | 98.9032079  |
| CTF1         | NM_001142544 | 86.50965393 | 6.903479124 | 7.96E-07    | 12.53131246 |
| CCNA2        | NM_001237    | 112.7541851 | 2.594306264 | 3.77E-12    | 43.46217202 |
| RHOT1        | NM_001288755 | 88.57142857 | 0.806414175 | 1.87E-10    | 109.8336703 |
| TARBP1       | NM_005646    | 143.9176338 | 0.825053564 | 4.03E-17    | 174.4342914 |
| TEC          | NM_003215    | 231.9588169 | 0.132481669 | 5.51E-35    | 1750.87481  |
| PRPF40A      | NM_017892    | 106.5096539 | 1.411849723 | 6.04E-11    | 75.43979518 |
| RRP12        | NM_015179    | 55.34620525 | 0.518036908 | 5.75E-07    | 106.8383437 |
| HINT3        | NM_138571    | 47.30502215 | 0.13900745  | 6.14E-08    | 340.3056602 |
| SLC37A4      | NM_001164278 | 124.1827566 | 12.21307936 | 4.53E-09    | 10.16801356 |
| HSPA14       | NM_016299    | 67.83526763 | 1.918770777 | 6.12E-07    | 35.35350258 |
| SPHK1        | NM_021972    | 84.71300204 | 5.747025389 | 2.61E-07    | 14.74032152 |
| FAM124A      | NM_001242312 | 97.67310262 | 0.691891255 | 4.68E-12    | 141.1682861 |
| MEIS3        | NM_001301059 | 60          | 3.291221687 | 2.96E-05    | 18.23031254 |
| NBR1         | NM_005899    | 49.63191953 | 0.958584121 | 6.89E-06    | 51.77627964 |
| LINC00883    | NR_028301    | 120.5302455 | 2.187544518 | 1.29E-13    | 55.09841948 |
| B3GALNT1     | NM_033168    | 43.91763382 | 2.081992994 | 0.000343476 | 21.09403535 |
| NCK1-AS1     | NR_110175    | 127.0398994 | 1.380788296 | 1.66E-15    | 92.005342   |
| KDM3A        | NM_001146688 | 40.26512274 | 1.818564529 | 0.001033106 | 22.14115699 |
| CTNBL1       | NM_001281495 | 69.10167405 | 0.443959357 | 6.25E-08    | 155.648649  |
| LOC554206    | NR_038379    | 109.3667968 | 17.56512173 | 4.18E-05    | 6.226361451 |
| LOC283922    | NR_026950    | 144.1827566 | 3.301523367 | 7.13E-14    | 43.67158446 |
| PLAUR        | NM_001005377 | 121.060491  | 4.832396743 | 1.92E-11    | 25.05185261 |
| UPP1         | NM_001287426 | 49.63191953 | 2.944217129 | 9.87E-05    | 16.85742503 |
| SEC14L1      | NM_001039573 | 54.55083703 | 1.611320995 | 3.92E-05    | 33.85472987 |
| TBC1D14      | NM_001113361 | 138.2033481 | 2.851056108 | 2.43E-13    | 48.47443996 |
| SPIN2B       | NM_001282462 | 83.38738834 | 4.977850464 | 1.03E-06    | 16.75168608 |
| RBM39        | NR_040724    | 98.46847084 | 4.853594555 | 1.47E-08    | 20.28774133 |
| NAPB         | NM_022080    | 61.59073644 | 1.378052128 | 2.75E-06    | 44.69405415 |
| LOC100507506 | NR_103764    | 118.7335936 | 1.271758205 | 1.09E-14    | 93.36176728 |
| SC5D         | NM_006918    | 118.7335936 | 1.307985667 | 1.09E-14    | 90.77591336 |
| LRCH1        | NM_001164211 | 63.65251108 | 1.327418701 | 7.24E-06    | 47.95209758 |
| DSN1         | NM_001145318 | 95.87645073 | 1.574298964 | 3.95E-11    | 60.90104414 |
| TSPAN9       | NM_001168320 | 108.8365513 | 0.542115024 | 2.41E-12    | 200.762839  |
| PACSLN3      | NM_016223    | 135.611328  | 7.991390479 | 3.88E-11    | 16.9696786  |
| MOCS1        | NM_001075098 | 66.50965393 | 1.904266129 | 1.12E-06    | 34.92665911 |
| NQO2         | NM_001290222 | 183.3873883 | 6.153346869 | 2.28E-17    | 29.80286863 |

|              |              |             |             |             |             |
|--------------|--------------|-------------|-------------|-------------|-------------|
| MAGT1        | NM_032121    | 27.03989941 | 0.376636768 | 0.003274355 | 71.79304237 |
| ZSWIM5       | NM_020883    | 68.83655131 | 0.198971805 | 1.90E-08    | 345.9613344 |
| SRR          | NM_021947    | 164.713002  | 6.054630669 | 2.35E-15    | 27.2044673  |
| RPL22        | NM_000983    | 97.93822536 | 5.056363065 | 2.15E-08    | 19.36930242 |
| MAGED2       | NM_201222    | 31.42857143 | 0.847430195 | 0.00123093  | 37.08691478 |
| SLC35A2      | NM_001282647 | 80          | 6.337867529 | 9.90E-07    | 12.62254215 |
| GLYCTK       | NR_026699    | 76.93694168 | 0.514460522 | 2.23E-11    | 149.5487768 |
| LOC101929574 | NR_120661    | 57.40797988 | 1.49062362  | 2.94E-06    | 38.51272655 |
| RBAK-RBAKDN  | NM_001204513 | 138.9987163 | 2.450171508 | 1.51E-15    | 56.73019863 |
| CNTNAP1      | NM_003632    | 43.65251108 | 3.686421274 | 0.002041429 | 11.84143315 |
| API5         | NM_001142930 | 103.1222656 | 1.380619948 | 1.82E-11    | 74.69272464 |
| PHOSPHO2     | NM_001199288 | 161.3256137 | 3.69001589  | 2.18E-17    | 43.71949025 |
| ZNF182       | NM_006962    | 29.10167405 | 0.921653122 | 0.001500666 | 31.57551724 |
| MOB1B        | NM_173468    | 89.89704227 | 1.051340554 | 3.35E-10    | 85.50706228 |
| DROSHA       | NM_013235    | 71.95881691 | 0.519085912 | 2.33E-08    | 138.6260254 |
| ZCCHC17      | NM_001282571 | 100.7953682 | 0.705921331 | 2.82E-12    | 142.7855539 |
| TLE3         | NM_020908    | 108.8365513 | 2.780109417 | 6.39E-11    | 39.14829778 |
| SAR1A        | NM_020150    | 103.6525111 | 3.834679525 | 8.22E-10    | 27.03029299 |
| OGDH         | NM_001003941 | 199.2638391 | 2.38927325  | 6.36E-21    | 83.39935127 |
| TMEM61       | NM_182532    | 75.87645073 | 1.890599069 | 4.60E-09    | 40.13354918 |
| SAMD5        | NM_001030060 | 124.4478793 | 0.721398428 | 1.76E-14    | 172.5092188 |
| TBRG4        | NM_199122    | 110.162165  | 6.963227003 | 3.90E-09    | 15.82056207 |
| OSGIN2       | NM_004337    | 72.48906239 | 3.716030125 | 3.34E-06    | 19.50712452 |
| CYHR1        | NM_032687    | 164.713002  | 38.66194263 | 3.02E-06    | 4.260339518 |
| PMS2         | NM_000535    | 133.0193079 | 0.707358751 | 6.27E-17    | 188.0506995 |
| MTDH         | NM_178812    | 161.060491  | 1.034304096 | 1.87E-17    | 155.7187017 |
| SSB          | NM_003142    | 154.8159598 | 2.524666988 | 6.66E-18    | 61.32133881 |
| ENOSF1       | NM_001126123 | 111.4285714 | 6.171745263 | 7.27E-10    | 18.05462907 |
| CCDC47       | NM_020198    | 97.40797988 | 3.827440716 | 7.05E-09    | 25.44989906 |
| GEM          | NM_181702    | 190.162165  | 3.75163891  | 8.29E-21    | 50.68775796 |
| XIAP         | NM_001167    | 60.53024548 | 0.726351342 | 2.51E-07    | 83.33466464 |
| ZNF76        | NM_003427    | 86.24453119 | 1.611295694 | 4.94E-09    | 53.52495604 |
| ETNK1        | NM_018638    | 167.8352676 | 1.293154194 | 1.26E-18    | 129.7875137 |
| INO80C       | NM_001098817 | 115.611328  | 1.05617664  | 1.30E-13    | 109.4621142 |
| CHTF8        | NM_001039690 | 117.4079799 | 7.155480706 | 2.88E-10    | 16.40811913 |
| CARS         | NM_001014437 | 101.5907364 | 2.259664657 | 2.36E-10    | 44.95832428 |
| SRSF1        | NR_034041    | 131.7529015 | 14.83729787 | 3.81E-09    | 8.879844739 |
| ZC3H11A      | NM_014827    | 69.89704227 | 2.438339128 | 1.38E-06    | 28.66584121 |
| SMPDL3A      | NM_006714    | 44.97812478 | 2.999245312 | 0.000209902 | 14.99648082 |
| RANBP3       | NM_003624    | 53.28443061 | 0.985098686 | 2.26E-06    | 54.09044935 |
| TMEM186      | NM_015421    | 58.46847084 | 8.987401911 | 0.00083828  | 6.505603223 |
| CCDC69       | NM_015621    | 113.2844306 | 2.078074897 | 5.51E-12    | 54.51412303 |
| MATN1-AS1    | NR_034182    | 146.5096539 | 8.554921519 | 1.61E-12    | 17.12577417 |
| RBBP8        | NM_203291    | 86.77477667 | 0.273150922 | 2.87E-11    | 317.6807016 |
| ATP2C1       | NM_001199183 | 71.95881691 | 0.596304228 | 2.58E-08    | 120.6746716 |
| PDLIM5       | NR_046186    | 168.8365513 | 2.876547015 | 1.45E-19    | 58.6941741  |
| SKP1         | NM_170679    | 177.9382254 | 1.27925261  | 3.57E-23    | 139.0954562 |
| SCMH1        | NM_001172218 | 46.50965393 | 0.985421277 | 4.08E-05    | 47.19773667 |
| TM2D3        | NM_025141    | 104.9781248 | 1.742974739 | 2.28E-12    | 60.22928642 |
| GLTSCR2      | NM_015710    | 106.7747767 | 4.358821831 | 8.11E-10    | 24.49624711 |
| HCCS         | NM_005333    | 120.2651227 | 0.453742238 | 2.27E-18    | 265.0516366 |
| CMTR2        | NM_018348    | 87.57014489 | 8.690751001 | 6.78E-07    | 10.07624599 |
| TPD52L2      | NR_045090    | 112.4890624 | 3.81206266  | 1.56E-10    | 29.50871285 |
| BIN1         | NM_139348    | 89.36679679 | 1.203432584 | 3.43E-09    | 74.2599112  |
| DLST         | NM_001933    | 118.7335936 | 2.925129844 | 4.46E-12    | 40.59087969 |
| PSMA1        | NM_148976    | 103.1222656 | 0.764997655 | 9.68E-12    | 134.8007604 |
| MPND         | NM_001300862 | 57.40797988 | 5.647103027 | 9.59E-05    | 10.16591686 |
| RNF138P1     | NR_001575    | 24.97812478 | 0.269270746 | 0.001688385 | 92.76211809 |
| MTIF3        | NM_152912    | 98.2033481  | 6.425564023 | 3.58E-08    | 15.28322615 |
| EIF3D        | NM_003753    | 118.2033481 | 5.719825828 | 2.95E-10    | 20.66555026 |
| CLASRP       | NM_007056    | 155.611328  | 4.09793857  | 5.17E-15    | 37.97307483 |
| TMC4         | NM_001145303 | 109.6319195 | 11.35553053 | 1.11E-07    | 9.654495601 |
| SMG1P5       | NR_002453    | 188.1003904 | 1.61533743  | 1.75E-20    | 116.4465002 |
| USP10        | NR_073577    | 180.2651227 | 2.763303245 | 2.84E-18    | 65.23537476 |

|           |              |             |             |             |             |
|-----------|--------------|-------------|-------------|-------------|-------------|
| CRB3      | NM_174881    | 113.0193079 | 1.729934607 | 1.73E-13    | 65.3315492  |
| MADD      | NM_003682    | 106.5096539 | 1.710293804 | 7.53E-11    | 62.27564744 |
| CAPN1     | NM_001198868 | 89.36679679 | 2.424022666 | 3.72E-09    | 36.86714569 |
| PSMC3IP   | NM_001256016 | 101.5907364 | 12.70458605 | 4.03E-07    | 7.996383043 |
| CCDC61    | NM_001267723 | 175.0810825 | 2.13595122  | 1.57E-19    | 81.96867083 |
| ZNF619    | NM_001145083 | 78.46847084 | 0.824048148 | 2.98E-10    | 95.22316269 |
| DHRS4L1   | NR_102689    | 146.7747767 | 2.083777142 | 7.24E-17    | 70.43688775 |
| PRPF3     | NM_004698    | 113.0193079 | 1.32333266  | 4.62E-13    | 85.40506202 |
| SECISBP2L | NM_014701    | 60.79536822 | 0.599043779 | 2.10E-07    | 101.4873543 |
| SLC35A3   | NM_012243    | 198.9987163 | 1.099170622 | 1.96E-23    | 181.0444277 |
| TRMT10B   | NM_001286953 | 107.0398994 | 3.89598438  | 6.52E-10    | 27.47441698 |
| TMEM126B  | NM_001256547 | 97.93822536 | 1.687809728 | 1.05E-11    | 58.0268165  |
| LSM4      | NM_001252129 | 89.89704227 | 9.819340789 | 2.53E-06    | 9.155099533 |
| DISC1     | NM_001164539 | 35.61132799 | 0.176871407 | 0.000386263 | 201.3402202 |
| HEATR5B   | NM_019024    | 81.59073644 | 0.371407199 | 2.52E-10    | 219.680008  |
| ZSCAN22   | NM_181846    | 203.6525111 | 1.799645913 | 1.23E-25    | 113.1625447 |
| PDK4      | NM_002612    | 26.50965393 | 0.453755548 | 0.001095033 | 58.42276542 |
| IDS       | NM_006123    | 160.2651227 | 1.641197074 | 4.48E-19    | 97.65135785 |
| MON1B     | NM_014940    | 84.18275656 | 7.832077491 | 3.10E-06    | 10.74845808 |
| PPCDC     | NR_125369    | 146.7747767 | 4.839205589 | 4.69E-14    | 30.33034533 |
| FAM46C    | NM_017709    | 194.8159598 | 2.286546751 | 4.21E-22    | 85.2009519  |
| C11orf49  | NR_103471    | 89.10167405 | 0.341380063 | 2.50E-10    | 261.0043284 |
| IKBIP     | NM_201612    | 40.32433002 | 0.556228365 | 3.23E-05    | 72.49599732 |
| ARHGAP29  | NM_004815    | 175.0810825 | 2.933554688 | 9.08E-18    | 59.68222894 |
| LINGO1    | NM_001301187 | 34.81595977 | 0.748434682 | 0.000634716 | 46.51836776 |
| LOXL3     | NM_001289165 | 56.67181894 | 6.084190931 | 0.000103621 | 9.314602317 |
| EPHB3     | NM_004443    | 123.3873883 | 2.938742778 | 1.69E-12    | 41.98645395 |
| CFL2      | NR_028131    | 110.6924105 | 6.838885287 | 7.32E-10    | 16.18573873 |
| PARP14    | NM_017554    | 87.03989941 | 0.071236796 | 3.59E-14    | 1221.839049 |
| IST1      | NM_001270979 | 106.2445312 | 2.709090875 | 6.18E-11    | 39.21778046 |
| THTPA     | NM_001256321 | 89.89704227 | 18.0218436  | 0.000206398 | 4.988226747 |
| ZNF480    | NM_001297625 | 72.75418513 | 0.879660425 | 4.47E-08    | 82.70712546 |
| TTLL4     | NM_014640    | 155.0810825 | 0.637490701 | 1.54E-19    | 243.2679915 |
| MAPT      | NM_016835    | 87.83526763 | 3.986778419 | 2.59E-08    | 22.03164019 |
| CLPX      | NM_006660    | 95.87645073 | 2.221068806 | 3.98E-10    | 43.16680801 |
| UBA52     | NM_001033930 | 123.6525111 | 13.92612026 | 1.74E-08    | 8.879178753 |
| IBTK      | NM_015525    | 116.6718189 | 0.929766541 | 1.37E-12    | 125.4850694 |
| NUP210    | NM_024923    | 37.67310262 | 1.526019232 | 0.002284859 | 24.6871742  |
| SEC16A    | NM_014866    | 117.6731026 | 2.625600744 | 4.56E-12    | 44.8175919  |
| RPS27L    | NM_015920    | 177.9382254 | 3.984329828 | 1.39E-19    | 44.6595119  |
| CCDC9     | NM_015603    | 52.22393965 | 3.565145896 | 0.000248575 | 14.64847195 |
| TCERG1    | NM_001040006 | 77.67310262 | 0.488802635 | 8.48E-10    | 158.9048363 |
| STIM1     | NM_001277962 | 69.10167405 | 0.414723043 | 8.00E-08    | 166.6212554 |
| TK1       | NM_003258    | 106.7747767 | 13.62373272 | 9.89E-07    | 7.837409823 |
| MYEOV     | NM_001300923 | 115.3462052 | 26.22383937 | 6.07E-05    | 4.398524702 |
| MRI1      | NM_001031727 | 40.53024548 | 3.573890299 | 0.002742831 | 11.34065181 |
| ETV4      | NM_001986    | 69.10167405 | 7.214398442 | 4.03E-05    | 9.578300202 |
| MALL      | NM_005434    | 55.61132799 | 12.19489553 | 0.003419185 | 4.560213561 |
| MGRN1     | NR_102267    | 152.7541851 | 0.914255761 | 3.34E-17    | 167.0803638 |
| CNOT7     | NM_013354    | 109.3667968 | 4.958306151 | 2.39E-10    | 22.05729002 |
| MIEF1     | NM_019008    | 69.63191953 | 5.330742692 | 5.80E-06    | 13.06232988 |
| GOLM1     | NM_177937    | 55.34620525 | 2.469033175 | 4.68E-05    | 22.41614483 |
| ATP5S     | NM_001003803 | 109.3667968 | 4.919348577 | 9.15E-10    | 22.23196732 |
| DYSF      | NM_001130982 | 55.34620525 | 0.545643877 | 3.82E-06    | 101.4328348 |
| NUDT16    | NM_001171906 | 89.36679679 | 8.605329816 | 2.53E-05    | 10.3850519  |
| SLC35A1   | NM_006416    | 158.9987163 | 2.489513727 | 2.73E-17    | 63.86737884 |
| ZDHHC4    | NM_018106    | 212.2239396 | 4.59503693  | 3.17E-22    | 46.18546986 |
| C6orf203  | NM_001142470 | 166.2445312 | 4.322915154 | 9.15E-17    | 38.45657971 |
| ADCK4     | NM_024876    | 107.8352676 | 6.075581979 | 4.96E-09    | 17.748961   |
| KIRREL    | NM_001286349 | 51.95881691 | 2.141715881 | 9.71E-05    | 24.26036869 |
| PPP1R3D   | NM_006242    | 80.26512274 | 2.172695649 | 3.55E-09    | 36.9426444  |
| TOM1L2    | NM_001288786 | 60.79536822 | 1.192259548 | 1.04E-06    | 50.99172266 |
| PGF       | NM_002632    | 124.1827566 | 1.753633642 | 3.04E-14    | 70.8145382  |
| APOBEC3G  | NM_021822    | 34.81595977 | 2.652990308 | 0.002284859 | 13.12328947 |

|              |              |             |             |             |             |
|--------------|--------------|-------------|-------------|-------------|-------------|
| TM7SF2       | NR_102367    | 237.1428571 | 28.89947301 | 1.99E-14    | 8.205784826 |
| LRRC8E       | NM_001268285 | 160.7953682 | 7.182604509 | 2.59E-14    | 22.38677739 |
| LINC00491    | NR_103755    | 35.08108251 | 0.885564402 | 0.000461911 | 39.61437746 |
| C1orf109     | NM_017850    | 78.99871632 | 2.768736319 | 2.50E-08    | 28.53240873 |
| FYCO1        | NM_024513    | 89.10167405 | 2.124793556 | 1.20E-08    | 41.93427347 |
| NELFA        | NM_005663    | 81.3256137  | 10.46627095 | 2.14E-05    | 7.770256866 |
| IL17RD       | NM_017563    | 98.73359358 | 1.478421064 | 3.87E-10    | 66.78313505 |
| GUCD1        | NM_001284252 | 136.4066962 | 9.742843972 | 3.09E-11    | 14.00070622 |
| MIER3        | NM_001297598 | 40.53024548 | 2.581887164 | 0.000989936 | 15.69791509 |
| PLA1A        | NM_001206961 | 26.50965393 | 0.433480378 | 0.002268597 | 61.1553724  |
| SARNP        | NM_033082    | 61.85585918 | 2.537256467 | 5.72E-06    | 24.37903302 |
| EXD2         | NR_034164    | 139.2638391 | 1.519960555 | 3.15E-15    | 91.62332444 |
| RAF1         | NM_002880    | 75.87645073 | 1.904818248 | 1.82E-07    | 39.83395833 |
| FAM104B      | NM_001166704 | 51.95881691 | 0.861008599 | 5.81E-06    | 60.34645525 |
| IL1RAP       | NM_001167929 | 109.3667968 | 0.209174861 | 2.89E-14    | 522.8486657 |
| SEC14L4      | NM_001161368 | 190.162165  | 2.769862583 | 4.72E-22    | 68.65400695 |
| CWC27        | NM_001297645 | 47.57014489 | 0.175107022 | 3.55E-07    | 271.6632631 |
| TCAIM        | NM_001029840 | 173.8146761 | 5.168964433 | 1.43E-16    | 33.62659549 |
| GTF2F1       | NM_002096    | 58.46847084 | 1.354611693 | 1.81E-06    | 43.16253223 |
| EXTL3        | NR_073468    | 75.34620525 | 2.28328943  | 2.91E-07    | 32.99897256 |
| SMIM14       | NM_174921    | 137.9382254 | 1.743854251 | 5.46E-14    | 79.09962963 |
| RNF41        | NR_040053    | 125.9794085 | 3.258308047 | 8.51E-13    | 38.66405712 |
| CANT1        | NM_001159773 | 92.48906239 | 3.618637604 | 1.14E-08    | 25.55908397 |
| RGS20        | NR_104579    | 72.48906239 | 1.791276152 | 6.84E-07    | 40.467832   |
| KDM8         | NM_001145348 | 95.34620525 | 0.628361703 | 1.26E-12    | 151.7377726 |
| HELQ         | NM_001297757 | 83.91763382 | 0.783116793 | 2.52E-10    | 107.1585166 |
| ZNF317       | NM_001190791 | 107.0398994 | 1.359099992 | 1.97E-12    | 78.75792808 |
| IP6K2        | NM_001146178 | 101.060491  | 4.637035917 | 3.50E-09    | 21.7942006  |
| NDUFV2-AS1   | NR_110772    | 60.79536822 | 4.931267432 | 4.18E-05    | 12.3285482  |
| UBR5         | NM_015902    | 79.5289618  | 1.323212259 | 1.18E-07    | 60.10295118 |
| RASAL2-AS1   | NR_027982    | 95.87645073 | 11.91828151 | 1.92E-06    | 8.044486166 |
| TRAPPC5      | NM_174894    | 106.2445312 | 5.406442811 | 4.19E-09    | 19.65146676 |
| RNF32        | NM_001184996 | 149.3667968 | 3.660162863 | 2.36E-14    | 40.8087843  |
| ACY1         | NM_001198897 | 122.3861047 | 17.83857747 | 1.22E-07    | 6.860754723 |
| SERF1B       | NM_022978    | 323.9176338 | 8.08973999  | 2.01E-31    | 40.04054941 |
| ZSCAN16-AS1  | NR_103456    | 69.36679679 | 8.466434267 | 4.05E-05    | 8.193153647 |
| DHX15        | NM_001358    | 105.2432475 | 2.127974581 | 1.04E-10    | 49.45700408 |
| C9orf72      | NM_018325    | 106.5096539 | 0.318467479 | 4.65E-15    | 334.4443653 |
| TM9SF1       | NM_001014842 | 110.162165  | 7.570707478 | 2.95E-09    | 14.55110574 |
| SBDSP1       | NR_024111    | 93.28443061 | 5.644450251 | 1.41E-08    | 16.5267522  |
| TPGS2        | NM_001271953 | 112.2239396 | 2.479414788 | 1.72E-11    | 45.26226923 |
| AMOT         | NM_133265    | 48.57142857 | 0.984516232 | 1.12E-05    | 49.33532528 |
| STAT4        | NM_003151    | 49.89704227 | 0.196444538 | 3.64E-06    | 254.0006593 |
| HNRNPA1P10   | NR_002944    | 138.4684708 | 21.60115951 | 1.03E-07    | 6.410233247 |
| CYB561A3     | NM_001161454 | 92.48906239 | 12.19677777 | 5.14E-06    | 7.58307351  |
| NR4A1        | NM_002135    | 177.6731026 | 4.472533512 | 6.79E-19    | 39.72538208 |
| MMADHC       | NM_015702    | 106.7747767 | 2.266233264 | 5.66E-12    | 47.11552794 |
| ITM2C        | NM_001012514 | 135.611328  | 2.725004497 | 8.22E-15    | 49.76554281 |
| SRSF10       | NM_001300936 | 141.5907364 | 13.50538838 | 4.35E-10    | 10.48401812 |
| LOC100289092 | NR_046288    | 147.0398994 | 2.065017825 | 3.55E-12    | 71.20514778 |
| MOV10        | NM_001286072 | 78.46847084 | 4.370926076 | 1.02E-06    | 17.95236741 |
| 6-Sep        | NM_145799    | 43.1222656  | 0.795289532 | 4.95E-05    | 54.22209633 |
| UNG          | NM_080911    | 46.77477667 | 4.13517806  | 0.000969924 | 11.31142988 |
| RBM5         | NM_005778    | 70.42728775 | 3.445321305 | 5.17E-07    | 20.44142811 |
| PPP1R3F      | NM_033215    | 54.28571429 | 3.476116296 | 0.000139895 | 15.61677161 |
| AHSA2        | NM_152392    | 117.6731026 | 7.618576065 | 7.90E-10    | 15.44555067 |
| CAPG         | NM_001747    | 47.30502215 | 3.678100313 | 0.000519271 | 12.86126482 |
| IFI35        | NM_005533    | 66.77477667 | 7.273740574 | 3.47E-05    | 9.180252717 |
| HES6         | NM_018645    | 214.8159598 | 24.59800991 | 1.52E-12    | 8.733062576 |
| HARS         | NM_001289093 | 115.611328  | 6.49113609  | 7.45E-10    | 17.81064614 |
| USH1G        | NM_173477    | 117.9382254 | 4.575066022 | 5.46E-12    | 25.77847506 |
| ZNF138       | NM_001160183 | 95.61132799 | 1.341845332 | 3.39E-10    | 71.25361299 |
| CXorf57      | NM_018015    | 60.79536822 | 0.235020645 | 4.14E-08    | 258.6809695 |
| 2-Sep        | NM_001008491 | 115.8764507 | 6.052885238 | 1.69E-10    | 19.1440026  |

|               |              |             |             |             |             |
|---------------|--------------|-------------|-------------|-------------|-------------|
| PSMB1         | NM_002793    | 104.1827566 | 4.06901795  | 7.26E-10    | 25.60390685 |
| LOC100287015  | NR_040040    | 166.5096539 | 10.864693   | 2.23E-13    | 15.32575784 |
| ANAPC15       | NM_001278491 | 75.87645073 | 12.46015973 | 0.00012077  | 6.089524725 |
| FANCA         | NM_001286167 | 104.9781248 | 3.813016013 | 3.43E-10    | 27.53151952 |
| PGK1          | NM_000291    | 75.34620525 | 2.804930467 | 1.30E-07    | 26.86205813 |
| ATAD2         | NM_014109    | 168.6306359 | 1.1946045   | 1.89E-18    | 141.1602215 |
| MLLT11        | NM_006818    | 35.34620525 | 1.249761527 | 0.000995503 | 28.28235986 |
| NUDT22        | NM_001128613 | 135.8764507 | 26.1716706  | 9.53E-07    | 5.191737769 |
| LOC101928736  | NR_110941    | 153.0193079 | 9.606324435 | 9.03E-13    | 15.92901727 |
| CCT6A         | NM_001009186 | 118.4684708 | 8.894033925 | 1.89E-09    | 13.31999314 |
| YEATS2        | NM_018023    | 121.3256137 | 1.207796204 | 3.47E-12    | 100.4520575 |
| SH3YL1        | NM_015677    | 72.48906239 | 0.733195783 | 5.89E-09    | 98.8672658  |
| UNC5A         | NM_133369    | 29.10167405 | 0.01263346  | 5.89E-05    | 2303.53948  |
| BRCC3         | NM_001018055 | 51.69369417 | 1.856571651 | 6.79E-05    | 27.84363003 |
| THADA         | NR_073394    | 117.9382254 | 0.308072326 | 2.37E-13    | 382.8264192 |
| PGAP2         | NR_027017    | 123.3873883 | 7.168784985 | 2.64E-10    | 17.21175744 |
| APP           | NM_201414    | 120.7953682 | 0.984130496 | 5.94E-13    | 122.7432426 |
| DCAF8         | NR_028103    | 121.5907364 | 2.716340198 | 1.36E-12    | 44.76270555 |
| GABPB2        | NM_144618    | 58.2033481  | 0.552077262 | 2.94E-07    | 105.4260918 |
| DOPEY1        | NM_001199942 | 44.4478793  | 0.693481239 | 2.54E-05    | 64.09384532 |
| RHPN1-AS1     | NR_026785    | 116.9369417 | 14.32601194 | 2.88E-07    | 8.162560675 |
| ESCO2         | NM_001017420 | 130.4272878 | 1.207734825 | 1.15E-15    | 107.9933153 |
| NCBP2         | NM_007362    | 81.59073644 | 11.21151841 | 1.47E-05    | 7.277402888 |
| HDAC8         | NM_001166419 | 75.34620525 | 0.856947573 | 1.46E-08    | 87.92393793 |
| PIK3R4        | NM_014602    | 89.10167405 | 0.113969663 | 1.41E-13    | 781.8016781 |
| TNIK          | NM_001161565 | 69.10167405 | 1.015328787 | 1.92E-07    | 68.05842101 |
| ABHD11        | NM_148912    | 118.2033481 | 12.86048142 | 6.72E-08    | 9.191207097 |
| PDLIM3        | NM_001257963 | 114.8159598 | 1.063286985 | 2.77E-13    | 107.9820983 |
| PLCG2         | NM_002661    | 163.9176338 | 0.547120753 | 5.64E-19    | 299.6004684 |
| RAD50         | NM_005732    | 155.0810825 | 1.522236215 | 4.29E-16    | 101.8771469 |
| CD81-AS1      | NR_108080    | 32.75418513 | 0.106487354 | 0.000114198 | 307.5875563 |
| HOXC4         | NM_014620    | 43.65251108 | 5.927993978 | 0.003003631 | 7.3637914   |
| WDR20         | NM_001242417 | 87.03989941 | 1.365933551 | 1.23E-08    | 63.72191337 |
| CIPC          | NM_033426    | 106.5096539 | 0.43993108  | 4.65E-15    | 242.105318  |
| CKMT2-AS1     | NR_034122    | 84.18275656 | 0.739500108 | 4.33E-10    | 113.8373824 |
| CBWD5         | NM_001286836 | 174.0797988 | 17.96428467 | 3.19E-12    | 9.690327335 |
| TSC1          | NM_001162426 | 86.77477667 | 0.799021343 | 1.38E-10    | 108.6013251 |
| REV1          | NM_001037872 | 97.14285714 | 1.558119476 | 1.15E-09    | 62.3462184  |
| STAMBP        | NM_006463    | 107.0398994 | 1.280850499 | 1.04E-11    | 83.56939353 |
| FAM114A1      | NM_138389    | 71.95881691 | 0.67536176  | 1.49E-08    | 106.5485509 |
| PRDX6         | NM_004905    | 121.3256137 | 3.133538683 | 4.45E-13    | 38.71840304 |
| PMS2P5        | NR_027777    | 180.7953682 | 0.406290279 | 2.90E-26    | 444.9906321 |
| ZNF670-ZNF695 | NR_037894    | 123.9176338 | 0.373415529 | 3.29E-15    | 331.8491713 |
| CDC42EP3      | NM_006449    | 47.83526763 | 6.180463762 | 0.00087356  | 7.739753759 |
| SH3BP5L       | NM_030645    | 49.10167405 | 1.373960306 | 3.19E-05    | 35.73733086 |
| ZBTB24        | NM_001164313 | 115.0810825 | 14.10535468 | 2.89E-07    | 8.158680525 |
| C21orf33      | NM_198155    | 134.8159598 | 11.54100739 | 2.70E-10    | 11.68147245 |
| WDR47         | NM_014969    | 64.71300204 | 1.334041578 | 2.02E-06    | 48.50898436 |
| SPOP          | NM_001007229 | 38.46847084 | 0.776032871 | 0.000225777 | 49.5706719  |
| PPIA          | NM_021130    | 169.1016741 | 15.62983928 | 2.52E-12    | 10.8191563  |
| TGOLN2        | NM_001206840 | 220         | 7.597256799 | 4.18E-21    | 28.95782067 |
| CHCHD2        | NM_016139    | 129.1016741 | 7.460459766 | 5.66E-11    | 17.30478792 |
| API3          | NM_001039569 | 77.67310262 | 2.702946469 | 2.39E-07    | 28.73645613 |
| VWA8          | NM_015058    | 126.7747767 | 0.200872445 | 8.20E-15    | 631.1207923 |
| GINS1         | NM_021067    | 146.2445312 | 0.631085361 | 1.69E-18    | 231.7349446 |
| SON           | NM_032195    | 113.0193079 | 3.11923261  | 1.32E-11    | 36.23304896 |
| CDK18         | NM_212503    | 77.67310262 | 6.097053901 | 1.45E-06    | 12.73944825 |
| KLHL11        | NM_014851    | 212.2239396 | 6.444200994 | 5.79E-21    | 32.93254506 |
| LRRC16A       | NM_017640    | 138.4684708 | 0.919967271 | 1.05E-14    | 150.514562  |
| CAST          | NM_173060    | 90.16216501 | 0.738961384 | 4.69E-11    | 122.0120116 |
| GOPC          | NM_020399    | 147.8352676 | 1.460799397 | 8.58E-17    | 101.2016215 |
| AP2M1         | NM_001025205 | 163.6525111 | 6.969420184 | 1.67E-15    | 23.48151019 |
| PRMT2         | NM_001286676 | 124.4478793 | 0.980639829 | 2.40E-15    | 126.9047775 |
| COPS4         | NM_016129    | 47.03989941 | 0.588844959 | 8.70E-06    | 79.88503368 |

|           |              |             |             |             |             |
|-----------|--------------|-------------|-------------|-------------|-------------|
| ABI1      | NM_001178124 | 117.6731026 | 0.70735131  | 9.91E-14    | 166.3573686 |
| ANKRD46   | NM_001270377 | 182.6512274 | 1.718541989 | 5.60E-21    | 106.2826678 |
| ZFYVE19   | NM_001077268 | 129.1016741 | 7.129055456 | 1.04E-11    | 18.10922567 |
| CCNG1     | NM_004060    | 182.6512274 | 4.988054297 | 1.09E-18    | 36.61773039 |
| GPR63     | NM_001143957 | 121.3256137 | 1.214057071 | 1.94E-13    | 99.93402834 |
| TCEB3-AS1 | NR_038280    | 123.6525111 | 4.563935761 | 4.40E-12    | 27.09339429 |
| LEMD3     | NM_014319    | 98.99871632 | 0.887450247 | 8.25E-12    | 111.5541031 |
| LRRC27    | NM_001143758 | 49.10167405 | 0.927988831 | 2.75E-05    | 52.91192351 |
| DUSP3     | NM_004090    | 172.4890624 | 7.251613425 | 1.04E-15    | 23.78630138 |
| CENPK     | NM_022145    | 80          | 0.12030925  | 7.31E-13    | 664.9530292 |
| HMGXB4    | NM_001003681 | 63.1222656  | 0.845340914 | 7.57E-08    | 74.67078024 |
| FAM76A    | NM_001143913 | 81.3256137  | 0.940054256 | 7.23E-09    | 86.51161693 |
| INTS2     | NR_026641    | 170.9575332 | 1.48429467  | 9.29E-19    | 115.1776239 |
| KBTBD3    | NM_152433    | 80.26512274 | 1.176986866 | 5.67E-09    | 68.19542774 |
| IRAK4     | NM_016123    | 152.4890624 | 0.806825087 | 1.47E-19    | 188.9989105 |
| NFYA      | NM_002505    | 115.3462052 | 2.837906135 | 4.56E-12    | 40.64482747 |
| RTFDC1    | NM_001283035 | 36.14157347 | 1.198644661 | 0.001707128 | 30.15203307 |
| PIK3R2    | NM_005027    | 131.6936942 | 8.153855273 | 1.06E-10    | 16.15109537 |
| ZBTB5     | NM_014872    | 66.24453119 | 4.898431878 | 1.68E-05    | 13.52361998 |
| LINC01024 | NR_102741    | 180.2651227 | 11.12509367 | 6.82E-15    | 16.20347011 |
| DNAJC19   | NR_046073    | 112.7541851 | 7.175792691 | 2.95E-09    | 15.71313303 |
| SLC25A10  | NM_001270888 | 117.9382254 | 6.653815299 | 3.33E-10    | 17.72490219 |
| TGM2      | NM_198951    | 58.46847084 | 0.382025022 | 3.53E-08    | 153.0487991 |
| SRP14-AS1 | NR_040061    | 69.36679679 | 2.6460782   | 3.69E-07    | 26.21494587 |
| RAP2B     | NM_002886    | 124.713002  | 7.064832496 | 3.46E-11    | 17.65264811 |
| ARHGAP12  | NM_001270696 | 126.2445312 | 1.137826114 | 8.26E-13    | 110.9523939 |
| RTN3      | NM_201429    | 136.6718189 | 1.336578655 | 1.85E-14    | 102.2549765 |
| LONRF3    | NR_110311    | 65.97940845 | 0.047761826 | 2.21E-11    | 1381.425594 |
| LOC647323 | NR_033944    | 41.3256137  | 0.585439623 | 5.57E-05    | 70.58902763 |
| ANKMY2    | NM_020319    | 95.87645073 | 1.253219039 | 1.92E-10    | 76.50414473 |
| TMEM136   | NM_001198672 | 109.3667968 | 6.787989942 | 3.30E-09    | 16.1118089  |
| RASSF1    | NM_007182    | 160.2651227 | 25.74575701 | 3.46E-09    | 6.22491398  |
| TMPPE     | NM_001136238 | 37.93822536 | 2.373732008 | 0.000553378 | 15.98252256 |
| HSP90AB1  | NM_001271971 | 98.73359358 | 23.10817881 | 6.72E-05    | 4.272668755 |
| TMEM231   | NR_074083    | 71.48777871 | 1.445910273 | 4.92E-08    | 49.44136579 |
| ZNF562    | NM_001300885 | 85.773493   | 0.307758672 | 8.38E-12    | 278.7037407 |
| BAIAP3    | NM_001199099 | 124.9781248 | 3.781164889 | 7.07E-13    | 33.05281003 |
| METTL14   | NM_020961    | 89.89704227 | 0.963385824 | 1.77E-10    | 93.31364449 |
| MED7      | NM_001100816 | 78.2033481  | 6.285320712 | 1.99E-06    | 12.4422208  |
| PLEKHG5   | NM_001042664 | 83.65251108 | 8.055146672 | 2.32E-06    | 10.38497677 |
| DDHD1     | NM_001160148 | 132.7541851 | 0.963119732 | 5.07E-15    | 137.8376755 |
| TP73      | NM_001204186 | 89.36679679 | 0.312975876 | 1.29E-11    | 285.5389298 |
| 10-Sep    | NM_178584    | 54.81595977 | 2.019069269 | 4.25E-05    | 27.14912291 |
| C1orf115  | NM_024709    | 58.46847084 | 4.775270868 | 4.52E-05    | 12.24401138 |
| PSMD6     | NM_014814    | 108.5714286 | 3.381293022 | 3.09E-11    | 32.10944094 |
| KIN       | NM_012311    | 78.2033481  | 1.120608099 | 2.62E-08    | 69.78652766 |
| SSFA2     | NM_006751    | 57.67310262 | 9.685017712 | 0.002019796 | 5.954878384 |
| AK2       | NM_001625    | 101.8558592 | 3.892195004 | 1.41E-09    | 26.16925901 |
| RPE       | NM_001278285 | 64.18275656 | 2.288926446 | 1.67E-06    | 28.04055004 |
| R3HCC1    | NM_001136108 | 93.01930787 | 7.499201774 | 1.52E-07    | 12.40389453 |
| ZNF669    | NM_024804    | 135.611328  | 5.746697178 | 2.01E-12    | 23.59813364 |
| DEDD2     | NR_073050    | 87.30502215 | 3.614569832 | 2.75E-08    | 24.15364102 |
| IQCD      | NM_138451    | 49.63191953 | 4.379923329 | 0.000738221 | 11.33168684 |
| PLK2      | NM_006622    | 191.9588169 | 9.385155725 | 6.51E-17    | 20.45345038 |
| C18orf21  | NM_001201475 | 137.9382254 | 0.238325947 | 1.56E-20    | 578.7797213 |
| JARID2    | NM_004973    | 68.83655131 | 1.182335632 | 1.79E-07    | 58.22082111 |
| C3orf52   | NM_024616    | 136.1415735 | 1.804458533 | 1.82E-15    | 75.44732726 |
| TP53I13   | NM_138349    | 72.22393965 | 4.511694995 | 1.11E-06    | 16.00816095 |
| FANCI     | NM_018193    | 58.99871632 | 1.522982802 | 9.29E-06    | 38.73892484 |
| NR2F1-AS1 | NR_109824    | 44.4478793  | 1.154755607 | 4.01E-05    | 38.49115694 |
| DONSON    | NM_017613    | 125.7142857 | 4.783864266 | 3.70E-12    | 26.27881535 |
| DPYD      | NM_001160301 | 63.1222656  | 0.156550964 | 7.12E-08    | 403.205857  |
| NKD1      | NM_033119    | 57.93822536 | 0.752947454 | 1.18E-06    | 76.94856397 |
| DPP8      | NM_017743    | 123.9176338 | 0.627682489 | 2.11E-15    | 197.4208871 |



|              |              |             |             |             |             |
|--------------|--------------|-------------|-------------|-------------|-------------|
| PRDM10       | NM_020228    | 57.93822536 | 1.361792167 | 2.13E-05    | 42.54557101 |
| VRK2         | NM_001288836 | 108.6306359 | 1.899717304 | 1.22E-10    | 57.18252691 |
| SLC26A6      | NM_001281732 | 103.6525111 | 3.493538249 | 6.56E-11    | 29.66977995 |
| MRPL30       | NR_028356    | 135.611328  | 4.173594234 | 1.64E-13    | 32.49269584 |
| KHDRBS1      | NR_073499    | 117.6731026 | 5.181917028 | 1.78E-10    | 22.70841119 |
| C8orf58      | NM_001013842 | 94.28571429 | 8.115533093 | 1.75E-07    | 11.61793233 |
| CBFA2T2      | NM_001032999 | 114.8159598 | 0.607454816 | 3.58E-13    | 189.0115227 |
| PVR          | NM_001135768 | 189.6319195 | 3.996559063 | 8.58E-20    | 47.44879696 |
| ARMCX3       | NM_177948    | 40.26512274 | 3.00896658  | 0.001115905 | 13.38171152 |
| AURKAIP1     | NM_001127229 | 99.26383906 | 12.38007465 | 4.01E-06    | 8.01803235  |
| USP33        | NM_015017    | 117.4079799 | 1.464847349 | 2.87E-12    | 80.15031733 |
| NIPA2        | NM_001008860 | 157.9382254 | 3.169601434 | 6.96E-16    | 49.82904905 |
| RPL13A       | NM_012423    | 178.4684708 | 34.9562925  | 2.05E-08    | 5.105474811 |
| MLXIPL       | NM_032952    | 209.8970423 | 5.94207098  | 1.84E-19    | 35.32388674 |
| ZNF765       | NM_001040185 | 47.03989941 | 0.527217502 | 1.92E-05    | 89.22294726 |
| PTPRU        | NM_005704    | 49.10167405 | 2.061462047 | 0.000176565 | 23.8188591  |
| PON2         | NM_000305    | 158.4684708 | 2.259783822 | 1.17E-17    | 70.12550018 |
| SKAP2        | NM_003930    | 115.0810825 | 0.232693683 | 3.22E-14    | 494.5604071 |
| TPD52        | NM_001025253 | 190.162165  | 1.673980132 | 1.84E-19    | 113.5988184 |
| TSG101       | NM_006292    | 176.1415735 | 0.069282416 | 5.36E-31    | 2542.370543 |
| BCL2L11      | NM_001204108 | 178.2033481 | 3.573468085 | 3.49E-17    | 49.8684594  |
| TMEM25       | NM_001144037 | 81.59073644 | 3.20812134  | 6.52E-08    | 25.43255937 |
| GTF2H2B      | NR_033417    | 155.8764507 | 1.236597929 | 9.04E-19    | 126.0526539 |
| SMUG1        | NM_001243788 | 111.9588169 | 9.046729121 | 1.66E-08    | 12.37561282 |
| ZNF248       | NM_001267597 | 142.1209819 | 0.075410489 | 6.58E-24    | 1884.631487 |
| PDE8A        | NM_001243137 | 119.2638391 | 0.714773179 | 1.13E-13    | 166.8555041 |
| CCDC77       | NM_001130148 | 101.060491  | 1.249124137 | 1.26E-10    | 80.90508216 |
| SLC9A6       | NM_001177651 | 54.55083703 | 0.764723677 | 1.70E-06    | 71.33405001 |
| DTNB         | NM_183360    | 88.83655131 | 0.063435229 | 4.18E-12    | 1400.429262 |
| SLC30A9      | NM_006345    | 130.162165  | 1.149858856 | 1.03E-13    | 113.1983846 |
| MVD          | NM_002461    | 91.48777871 | 0.705391791 | 9.95E-13    | 129.6978217 |
| MRPL52       | NM_181307    | 69.89704227 | 3.15408348  | 1.47E-06    | 22.16080922 |
| HNRNPA2B1    | NM_031243    | 233.2844306 | 10.4480457  | 7.91E-21    | 22.32804462 |
| CANX         | NM_001024649 | 85.24324752 | 2.751350904 | 1.09E-08    | 30.98232486 |
| KRCC1        | NM_016618    | 161.3256137 | 2.734113323 | 1.33E-16    | 59.00472827 |
| NFYC         | NM_014223    | 69.89704227 | 1.92935782  | 1.47E-06    | 36.22813848 |
| MYO5A        | NM_000259    | 109.6319195 | 0.37919711  | 1.20E-12    | 289.1159153 |
| DFFA         | NM_004401    | 87.83526763 | 4.666145599 | 1.76E-08    | 18.82394489 |
| C1QTNF9B-AS1 | NM_001014442 | 51.95881691 | 5.455492202 | 0.000897332 | 9.524129993 |
| BCCIP        | NM_016567    | 82.6512274  | 7.513232807 | 2.54E-06    | 11.00075421 |
| CENPJ        | NR_047594    | 106.2445312 | 1.343900564 | 1.42E-11    | 79.05683951 |
| SCD          | NM_005063    | 110.162165  | 12.25525928 | 9.69E-08    | 8.988970571 |
| GPBP1        | NM_022913    | 94.28571429 | 0.950524768 | 6.43E-11    | 99.19332713 |
| LOC81691     | NM_001199053 | 183.9176338 | 1.538940264 | 5.05E-21    | 119.5092741 |
| RALA         | NM_005402    | 78.46847084 | 0.745366312 | 4.18E-09    | 105.2750434 |
| ADSL         | NM_000026    | 182.6512274 | 4.859881859 | 7.28E-18    | 37.58347069 |
| SHOX2        | NM_006884    | 80.53024548 | 3.205277844 | 5.39E-08    | 25.1242636  |
| KRIT1        | NM_194455    | 93.28443061 | 1.401032942 | 6.11E-10    | 66.58261046 |
| STX17        | NM_017919    | 200.2651227 | 1.411434434 | 3.17E-22    | 141.8876555 |
| STIP1        | NM_001282652 | 153.8146761 | 7.498473477 | 4.34E-13    | 20.51279858 |
| FBXO27       | NM_178820    | 63.1222656  | 11.53623765 | 0.001204423 | 5.471650943 |
| BCDIN3D-AS1  | NR_027499    | 123.9176338 | 3.90158877  | 6.10E-12    | 31.76081363 |
| LYN          | NM_002350    | 63.65251108 | 0.644126992 | 3.13E-07    | 98.81981641 |
| PHKB         | NM_001031835 | 124.4478793 | 0.372104974 | 1.21E-14    | 334.4429342 |
| PCID2        | NM_018386    | 160.5302455 | 0.390783642 | 5.80E-23    | 410.7905968 |
| CRABP2       | NM_001199723 | 84.4478793  | 13.22699016 | 2.62E-05    | 6.384512145 |
| MASTL        | NM_001172303 | 67.30502215 | 4.430864375 | 9.09E-06    | 15.1900434  |
| CD276        | NM_001024736 | 62.85714286 | 4.574322759 | 3.32E-05    | 13.74130033 |
| AGA          | NR_033655    | 93.54955335 | 6.046001923 | 4.08E-08    | 15.47296123 |
| RFWD3        | NM_018124    | 69.89704227 | 3.199773419 | 1.41E-06    | 21.84437243 |
| NDUFV1       | NM_001166102 | 47.03989941 | 1.951425065 | 0.000165225 | 24.10540904 |
| HIGD1A       | NM_001099669 | 135.3462052 | 0.484435728 | 3.02E-19    | 279.3893954 |
| RNF146       | NM_001242852 | 176.6718189 | 3.344536358 | 7.03E-19    | 52.82400908 |
| NFKB1        | NM_001165412 | 40.53024548 | 0.637422954 | 0.000117335 | 63.58454025 |

|              |              |             |             |             |             |
|--------------|--------------|-------------|-------------|-------------|-------------|
| PLOD2        | NM_000935    | 78.46847084 | 0.646805215 | 3.71E-09    | 121.317004  |
| C14orf169    | NM_024644    | 81.06049096 | 6.611183737 | 3.18E-06    | 12.26111604 |
| TRAPPC11     | NM_199053    | 92.22393965 | 0.199067087 | 1.71E-13    | 463.2807017 |
| FBXL4        | NR_103836    | 120.2651227 | 0.413389687 | 9.34E-16    | 290.9243422 |
| EMR2         | NM_001271052 | 197.9382254 | 2.257914205 | 9.55E-22    | 87.66419244 |
| COG6         | NM_001145079 | 112.7541851 | 0.25161201  | 2.28E-14    | 448.1271983 |
| NFE2L2       | NM_006164    | 144.1827566 | 4.704500914 | 1.73E-13    | 30.64783262 |
| YAP1         | NM_006106    | 37.93822536 | 0.816939312 | 0.000277132 | 46.43946592 |
| MDM1         | NM_001205029 | 41.06049096 | 2.962050865 | 0.001860845 | 13.86218294 |
| TMEM230      | NM_001009924 | 83.91763382 | 2.039047895 | 1.41E-09    | 41.15530294 |
| VPS13B       | NM_152564    | 273.8146761 | 0.153852253 | 4.94E-32    | 1779.724837 |
| CSRNP2       | NM_030809    | 158.2033481 | 6.877469697 | 3.70E-14    | 23.0031327  |
| NFAT5        | NM_173215    | 134.550837  | 3.056105097 | 5.43E-13    | 44.02690115 |
| YWHAZ        | NM_001135699 | 89.89704227 | 12.86307778 | 1.64E-05    | 6.988766128 |
| GLIPR2       | NM_001287010 | 82.38610466 | 2.881174829 | 1.87E-08    | 28.59462183 |
| CHIC2        | NM_012110    | 118.7335936 | 1.346241735 | 6.44E-13    | 88.19633986 |
| PSMG3-AS1    | NR_027329    | 186.7747767 | 1.894692428 | 4.53E-22    | 98.57788733 |
| NAA60        | NM_001083600 | 38.2033481  | 2.126267761 | 0.001719583 | 17.96732697 |
| LINC00673    | NR_036488    | 288.3655131 | 3.837146783 | 8.03E-27    | 75.15102481 |
| EXOSC3       | NM_016042    | 121.5907364 | 8.95117409  | 8.48E-10    | 13.58377518 |
| ARL13B       | NM_001174150 | 117.9382254 | 0.314674243 | 6.85E-16    | 374.794658  |
| TMEM168      | NM_001287497 | 97.93822536 | 0.642982253 | 3.55E-12    | 152.318707  |
| RNF4         | NM_002938    | 120.5302455 | 4.034377834 | 6.29E-11    | 29.87579509 |
| TOMM40       | NM_006114    | 89.36679679 | 6.101460316 | 1.97E-07    | 14.64678817 |
| CHMP1A       | NM_002768    | 127.5701449 | 3.550052134 | 1.12E-13    | 35.93472435 |
| LOC100507564 | NR_038953    | 75.34620525 | 7.23233147  | 5.57E-06    | 10.41796903 |
| CTDNEP1      | NM_015343    | 89.63191953 | 3.390043269 | 2.59E-09    | 26.43975679 |
| LTV1         | NM_032860    | 83.38738834 | 2.021491563 | 4.99E-09    | 41.25042611 |
| ACAD8        | NM_014384    | 130.9575332 | 0.320252534 | 9.55E-21    | 408.9195851 |
| TSPAN10      | NM_001290212 | 111.9588169 | 2.728164916 | 3.76E-12    | 41.03814115 |
| INSIG1       | NM_005542    | 123.6525111 | 4.350540447 | 8.86E-12    | 28.4223334  |
| SH3GLB2      | NM_020145    | 40.53024548 | 0.259644985 | 4.63E-06    | 156.0987035 |
| LOC102606465 | NR_109849    | 128.6306359 | 0.21221698  | 4.16E-19    | 606.1279161 |
| CAAP1        | NM_024828    | 127.3050222 | 0.461026028 | 1.37E-17    | 276.1341323 |
| ARID1B       | NM_017519    | 49.36679679 | 0.887287559 | 2.31E-05    | 55.63787781 |
| ROR1         | NM_005012    | 127.0398994 | 0.113456062 | 9.59E-16    | 1119.727733 |
| TMEM143      | NM_018273    | 63.65251108 | 5.226955879 | 3.64E-05    | 12.17774027 |
| FOS          | NM_005252    | 216.1415735 | 19.78242696 | 4.64E-15    | 10.92593815 |
| LOC148709    | NR_002929    | 58.99871632 | 1.152447313 | 4.89E-07    | 51.19428509 |
| TRIM7        | NM_203295    | 67.03989941 | 4.019502522 | 4.78E-06    | 16.67865589 |
| LOC101929231 | NR_110240    | 71.95881691 | 0.187531203 | 1.34E-08    | 383.7164994 |
| GLB1L        | NM_001286423 | 78.2033481  | 3.02849064  | 7.36E-08    | 25.82254905 |
| UBE3D        | NM_198920    | 139.5289618 | 0.583586331 | 3.43E-16    | 239.0888108 |
| CPNE1        | NM_152925    | 146.5096539 | 6.08584688  | 1.62E-12    | 24.07383177 |
| C1orf27      | NM_001164246 | 44.4478793  | 0.813879743 | 1.47E-05    | 54.61234253 |
| UBE3B        | NM_001270449 | 215.8764507 | 1.20350271  | 3.28E-30    | 179.3734645 |
| RNF7         | NM_183237    | 79.26383906 | 5.748865812 | 7.97E-07    | 13.78773512 |
| TOMM5        | NM_001001790 | 115.0810825 | 0.748916762 | 4.02E-15    | 153.663382  |
| CDK11B       | NM_033486    | 86.77477667 | 5.08863536  | 3.51E-07    | 17.05266157 |
| ABCC3        | NM_001144070 | 81.59073644 | 6.87030028  | 2.55E-06    | 11.87586177 |
| SCP2         | NM_001193617 | 83.65251108 | 0.380355128 | 4.33E-10    | 219.9326493 |
| PAPOLA       | NM_001252007 | 112.2239396 | 1.02407112  | 4.73E-13    | 109.5860799 |
| UBE2F        | NR_103500    | 38.2033481  | 0.145198648 | 4.52E-05    | 263.1109072 |
| DUS3L        | NM_001161619 | 75.61132799 | 1.433733818 | 5.69E-09    | 52.73735405 |
| SGSM1        | NM_001098497 | 226.5096539 | 0.593011349 | 5.13E-28    | 381.9651249 |
| TMOD1        | NM_001166116 | 47.03989941 | 1.547274892 | 0.000323004 | 30.40177259 |
| NOP16        | NM_001291307 | 81.85585918 | 7.045474014 | 7.49E-07    | 11.61821888 |
| LMBR1        | NM_022458    | 151.9588169 | 1.013702103 | 1.47E-16    | 149.9048059 |
| NCEH1        | NM_001146276 | 106.2445312 | 1.57333767  | 1.11E-10    | 67.52811757 |
| RUFY2        | NM_001278225 | 84.97812478 | 2.250757406 | 6.63E-09    | 37.75534606 |
| GPN3         | NM_016301    | 90.69241049 | 0.832948837 | 6.83E-12    | 108.8811298 |
| GULP1        | NR_045562    | 120.5302455 | 0.478305837 | 1.99E-13    | 251.9940928 |
| USP19        | NM_001199162 | 73.01930787 | 4.277922172 | 7.76E-07    | 17.06887244 |
| TMEM106A     | NM_001291586 | 60.53024548 | 4.321388312 | 1.65E-05    | 14.00712945 |

|              |              |             |             |             |             |
|--------------|--------------|-------------|-------------|-------------|-------------|
| TRIM41       | NM_033549    | 109.8970423 | 15.38278367 | 5.87E-07    | 7.144158339 |
| CTTNBP2NL    | NM_018704    | 103.6525111 | 0.125528471 | 5.85E-16    | 825.7291002 |
| ZMYND8       | NM_001281781 | 46.50965393 | 2.570203195 | 0.000387419 | 18.09571089 |
| ATG12        | NR_073603    | 91.95881691 | 8.007252255 | 8.40E-07    | 11.4844411  |
| LINC00173    | NR_027345    | 100         | 15.78204246 | 1.01E-05    | 6.336315484 |
| ZNF7         | NM_001282797 | 135.611328  | 7.89943697  | 3.87E-11    | 17.16721438 |
| TAF9B        | NM_015975    | 74.55083703 | 5.604120535 | 4.19E-06    | 13.30286109 |
| MKLN1        | NM_013255    | 126.5096539 | 0.236792459 | 5.03E-16    | 534.2638622 |
| SLC22A5      | NM_003060    | 132.2239396 | 4.026805851 | 9.61E-13    | 32.83593611 |
| TSPAN3       | NM_001168412 | 101.5907364 | 1.127952447 | 4.26E-12    | 90.06650654 |
| RNF111       | NM_001270528 | 136.1415735 | 1.044557127 | 2.46E-14    | 130.3342536 |
| ARAF         | NM_001256197 | 66.24453119 | 4.111174315 | 5.92E-06    | 16.11328689 |
| C21orf67     | NR_027129    | 186.5096539 | 7.206287753 | 1.59E-17    | 25.8815163  |
| ZNF219       | NM_001102454 | 63.65251108 | 7.835104064 | 0.00012883  | 8.124016038 |
| C14orf178    | NM_174943    | 50.42728775 | 2.068663621 | 1.05E-05    | 24.37674605 |
| LPCAT1       | NM_024830    | 69.10167405 | 2.992485895 | 1.65E-06    | 23.09172924 |
| METTL9       | NM_016025    | 80.79536822 | 0.72906596  | 7.69E-10    | 110.820382  |
| RABEP1       | NM_001291581 | 140.7953682 | 1.623551959 | 3.37E-14    | 86.72058041 |
| BMS1P6       | NR_024495    | 155.3462052 | 1.174913834 | 2.20E-20    | 132.2192324 |
| RPS10        | NM_001203245 | 87.83526763 | 10.58556029 | 4.87E-06    | 8.297649365 |
| FPGT         | NM_001199328 | 104.1827566 | 1.876774808 | 7.41E-12    | 55.51159155 |
| RHOD         | NM_014578    | 117.6731026 | 5.734953775 | 1.83E-10    | 20.51857909 |
| PFKP         | NM_002627    | 155.0810825 | 3.996940745 | 3.41E-14    | 38.79994536 |
| ACP1         | NM_007099    | 137.4079799 | 2.251738691 | 9.57E-16    | 61.02305761 |
| ACTR6        | NR_048569    | 39.5289618  | 0.091492359 | 1.05E-06    | 432.0465927 |
| IFT20        | NM_174887    | 34.34492157 | 0.582884181 | 0.000279437 | 58.92237716 |
| SMARCA5      | NM_003601    | 89.89704227 | 2.066596993 | 5.29E-09    | 43.50003535 |
| GPR89A       | NM_001097613 | 157.6731026 | 1.125504837 | 1.36E-17    | 140.091004  |
| PPARD        | NM_001171818 | 130.162165  | 2.582001233 | 4.78E-13    | 50.4113489  |
| ST3GAL4      | NM_001254757 | 54.81595977 | 0.87637588  | 1.87E-06    | 62.54845786 |
| RNF166       | NM_178841    | 127.5701449 | 2.087536568 | 1.73E-15    | 61.11037616 |
| CBR3-AS1     | NR_038892    | 129.3667968 | 5.298708523 | 3.58E-12    | 24.41477885 |
| CMC1         | NM_182523    | 166.5096539 | 0.293573383 | 2.44E-23    | 567.1823937 |
| NAA40        | NM_024771    | 69.89704227 | 0.469644779 | 4.70E-09    | 148.829595  |
| TNFRSF11A    | NM_003839    | 38.46847084 | 1.825224325 | 0.002122683 | 21.07602354 |
| SCN5A        | NM_001099405 | 63.1222656  | 0.160796566 | 1.57E-08    | 392.5597854 |
| SLC29A1      | NM_001078174 | 122.8571429 | 9.066910947 | 7.13E-10    | 13.55005509 |
| PIP4K2B      | NM_003559    | 103.3873883 | 4.969939349 | 3.37E-09    | 20.80254528 |
| GPN1         | NM_001145049 | 33.28443061 | 2.348400345 | 0.00315871  | 14.17323527 |
| RBM27        | NM_018989    | 112.2239396 | 0.998984625 | 1.05E-11    | 112.3380049 |
| RTBDN        | NM_031429    | 73.01930787 | 11.59232191 | 0.000134784 | 6.298937214 |
| EOGT         | NM_001278689 | 120.5302455 | 0.842152365 | 2.45E-14    | 143.1216613 |
| RANBP6       | NM_001243202 | 115.0810825 | 1.729873774 | 1.06E-13    | 66.52571084 |
| CENPO        | NM_001199803 | 69.63191953 | 5.25040316  | 9.52E-06    | 13.26220433 |
| PARP9        | NM_001146103 | 70.42728775 | 1.779913127 | 2.92E-07    | 39.5678231  |
| RBM4         | NM_001198843 | 104.4478793 | 4.970576333 | 3.58E-10    | 21.01323313 |
| SLC41A3      | NM_001008485 | 131.6936942 | 2.203283333 | 2.98E-13    | 59.77156555 |
| BTF3L4       | NM_001136497 | 67.30502215 | 2.210973799 | 7.63E-07    | 30.4413477  |
| C12orf4      | NM_020374    | 66.50965393 | 0.524972949 | 2.01E-08    | 126.6915831 |
| ARL4C        | NM_001282431 | 86.24453119 | 4.697747098 | 5.57E-08    | 18.35870033 |
| CHTOP        | NM_001206612 | 52.22393965 | 8.650344046 | 0.001428964 | 6.037209546 |
| MSTO1        | NM_001256533 | 99.26383906 | 7.769346092 | 4.04E-08    | 12.7763441  |
| FGFR1OP      | NM_194429    | 83.65251108 | 0.057422259 | 1.68E-14    | 1456.795891 |
| PCBP1-AS1    | NR_033872    | 110.4272878 | 1.145427213 | 3.26E-11    | 96.40707544 |
| LOC101927620 | NR_110062    | 169.6319195 | 4.457531263 | 3.88E-18    | 38.05512727 |
| BLMH         | NM_000386    | 115.611328  | 2.269654934 | 7.20E-12    | 50.93784358 |
| ZNF146       | NM_001099639 | 41.85585918 | 4.092985197 | 0.002449862 | 10.2262425  |
| C10orf2      | NM_001163813 | 123.7117184 | 5.333090145 | 1.13E-11    | 23.19700492 |
| POLR3D       | NM_001722    | 129.6319195 | 7.2189377   | 2.73E-11    | 17.95720159 |
| CDK13        | NM_003718    | 52.22393965 | 0.843978753 | 8.05E-06    | 61.87826346 |
| ZBTB4        | NM_020899    | 52.75418513 | 6.739333048 | 0.001689509 | 7.827805029 |
| TRPV6        | NM_018646    | 42.85714286 | 0.961220322 | 9.84E-05    | 44.58618057 |
| SRA1         | NR_045587    | 163.9176338 | 14.65905302 | 1.29E-11    | 11.18200703 |
| ALOX12P2     | NR_002710    | 37.67310262 | 1.165611182 | 0.001625524 | 32.32047118 |

|          |              |             |             |             |             |
|----------|--------------|-------------|-------------|-------------|-------------|
| C17orf62 | NM_001193654 | 128.8957586 | 6.582340846 | 1.12E-11    | 19.58205471 |
| LHPP     | NM_001167880 | 204.9781248 | 0.936200936 | 2.08E-23    | 218.9467207 |
| UTP23    | NM_032334    | 71.48777871 | 0.592865882 | 3.98E-10    | 120.580018  |
| ZMIZ2    | NM_001300959 | 85.71428571 | 6.774207688 | 9.35E-07    | 12.65303481 |
| DDX19B   | NM_001014449 | 110.162165  | 2.228547724 | 8.11E-12    | 49.43226649 |
| DUSP18   | NM_152511    | 113.5495533 | 6.066795145 | 1.24E-10    | 18.71656297 |
| RER1     | NM_007033    | 92.48906239 | 6.858330163 | 1.40E-07    | 13.48565324 |
| GPR161   | NM_001267612 | 38.46847084 | 1.130434213 | 0.000231235 | 34.02981829 |
| ENDOV    | NM_173627    | 128.1003904 | 6.977414308 | 4.40E-11    | 18.35929253 |
| UBE2E3   | NM_001278555 | 89.36679679 | 0.437778037 | 3.71E-11    | 204.137232  |
| CEP120   | NM_001166226 | 68.10039037 | 0.964120579 | 5.94E-08    | 70.63472338 |
| TMEM11   | NM_003876    | 79.26383906 | 3.204883797 | 1.59E-07    | 24.73220375 |
| BIRC3    | NM_182962    | 78.73359358 | 0.136255942 | 1.54E-13    | 577.8360352 |
| ANXA2    | NM_001002858 | 98.46847084 | 3.951237269 | 1.58E-08    | 24.92092075 |
| ANKHD1   | NM_017747    | 75.87645073 | 1.249615366 | 2.00E-07    | 60.71984451 |
| MRPL39   | NM_017446    | 141.3256137 | 0.498000983 | 6.13E-20    | 283.7858128 |
| INF2     | NM_032714    | 100.2651227 | 2.448431176 | 2.11E-10    | 40.95076216 |
| SPDYC    | NM_001008778 | 109.3667968 | 14.19700397 | 9.93E-07    | 7.703512446 |
| CAMSAP2  | NM_001297707 | 29.36679679 | 0.761282133 | 0.002365549 | 38.57544467 |
| LARP4    | NM_052879    | 87.03989941 | 1.039184884 | 6.17E-10    | 83.75785746 |
| SNHG17   | NR_027241    | 158.2033481 | 8.010298466 | 1.13E-13    | 19.74999418 |
| ZNF70    | NM_021916    | 77.67310262 | 2.184689098 | 3.59E-08    | 35.55338958 |
| DNAJA3   | NM_001135110 | 144.713002  | 3.388815992 | 2.31E-14    | 42.70311589 |
| ADAT3    | NM_138422    | 101.3256137 | 9.458128904 | 2.58E-07    | 10.71307176 |
| ZNF276   | NR_110129    | 118.4684708 | 15.62790539 | 1.48E-07    | 7.580572564 |
| GSTZ1    | NM_001513    | 61.06049096 | 4.2249136   | 2.23E-05    | 14.45248276 |
| TBC1D9B  | NM_198868    | 51.69369417 | 2.836914245 | 7.94E-05    | 18.22180359 |
| PPT1     | NM_001142604 | 101.5907364 | 3.825847562 | 1.27E-09    | 26.55378574 |
| ILF3     | NM_012218    | 94.81595977 | 5.904165507 | 3.42E-08    | 16.05916359 |
| FBXO25   | NM_012173    | 46.50965393 | 0.110305239 | 1.02E-06    | 421.6450124 |
| MST4     | NM_001042453 | 78.46847084 | 0.710122173 | 1.34E-09    | 110.4999587 |
| TNRC6B   | NM_015088    | 30.42728775 | 0.429799799 | 0.001054751 | 70.79409486 |
| ZNF408   | NM_024741    | 246.7747767 | 8.40444699  | 2.11E-23    | 29.36240504 |
| MELK     | NM_001256690 | 146.2445312 | 1.598551082 | 7.73E-15    | 91.48567903 |
| TRIM26   | NM_003449    | 72.22393965 | 0.857615369 | 4.47E-08    | 84.21483831 |
| PSMA3    | NM_002788    | 121.5907364 | 5.743679991 | 1.69E-10    | 21.16948309 |
| HEXA     | NM_000520    | 73.28443061 | 1.173350463 | 5.04E-08    | 62.45740971 |
| NUAK1    | NM_014840    | 29.89704227 | 0.581000995 | 0.001902027 | 51.45781592 |
| TTC39B   | NM_001168340 | 89.63191953 | 0.071767667 | 3.37E-13    | 1248.917841 |
| COQ9     | NM_020312    | 156.6718189 | 1.283669994 | 3.12E-20    | 122.0499191 |
| DNAJC8   | NM_014280    | 86.24453119 | 1.494461302 | 3.21E-09    | 57.70944423 |
| KIAA1244 | NM_020340    | 69.10167405 | 0.2099653   | 1.90E-08    | 329.1099724 |
| MYO5C    | NM_018728    | 123.1222656 | 1.658906424 | 2.57E-12    | 74.21893351 |
| ATP6V0D1 | NM_004691    | 116.1415735 | 1.523477009 | 9.88E-13    | 76.23454296 |
| P2RX4    | NM_001256796 | 73.54955335 | 5.212247333 | 2.20E-06    | 14.11091007 |
| TOMM70A  | NM_014820    | 67.30502215 | 1.475589237 | 5.05E-07    | 45.61230217 |
| MARK3    | NM_001128921 | 108.3655131 | 1.530119154 | 9.74E-11    | 70.82161728 |
| CEP131   | NM_001009811 | 81.85585918 | 0.410883369 | 9.80E-12    | 199.2192074 |
| SSH2     | NM_001282130 | 94.55083703 | 0.114419551 | 2.99E-12    | 826.3521099 |
| C3orf58  | NM_173552    | 152.2239396 | 2.468300905 | 1.80E-16    | 61.67154876 |
| SPATA33  | NR_073515    | 170.162165  | 7.830198717 | 1.39E-15    | 21.73152575 |
| CC2D1B   | NM_032449    | 116.1415735 | 3.884960905 | 7.95E-12    | 29.89517174 |
| SGPP1    | NM_030791    | 143.9176338 | 0.207129612 | 2.06E-22    | 694.8192105 |
| SNX2     | NM_003100    | 125.9794085 | 0.186620073 | 4.67E-19    | 675.05819   |
| SLC10A4  | NM_152679    | 55.61132799 | 2.766277183 | 2.36E-05    | 20.10331008 |
| PDE5A    | NM_033437    | 26.50965393 | 0.207516066 | 0.003388022 | 127.7474775 |
| ZNF35    | NM_003420    | 97.67310262 | 2.574354943 | 2.67E-10    | 37.94080644 |
| ATP2A2   | NM_170665    | 120.7953682 | 2.101089582 | 3.88E-12    | 57.49177439 |
| ARF6     | NM_001663    | 115.611328  | 11.38279776 | 2.92E-08    | 10.15667065 |
| BRMS1    | NM_015399    | 169.3667968 | 0.699110462 | 2.34E-24    | 242.2604237 |
| MRPS18A  | NM_018135    | 78.99871632 | 2.702097716 | 1.13E-07    | 29.23606939 |
| TCF12    | NM_207037    | 73.28443061 | 0.184105781 | 1.05E-08    | 398.0561088 |
| TESC     | NM_017899    | 97.93822536 | 0.677334655 | 4.02E-12    | 144.5935545 |
| SPRY1    | NM_001258039 | 66.77477667 | 5.053143072 | 1.11E-05    | 13.21450347 |

|               |              |             |             |             |             |
|---------------|--------------|-------------|-------------|-------------|-------------|
| BTRC          | NM_003939    | 88.36551311 | 1.451488261 | 1.93E-08    | 60.8792475  |
| SLC12A2       | NR_046207    | 139.2638391 | 0.851487667 | 2.26E-16    | 163.5535597 |
| TXLNG         | NM_018360    | 126.5096539 | 1.846686442 | 4.21E-13    | 68.50629921 |
| MPDU1         | NR_024603    | 87.30502215 | 18.15140053 | 0.000115037 | 4.809822911 |
| WDR35         | NM_001006657 | 83.65251108 | 0.298395576 | 6.38E-11    | 280.3409896 |
| ZNF658B       | NR_003528    | 195.8764507 | 6.921933057 | 9.08E-18    | 28.29794063 |
| FAM122C       | NM_001170783 | 35.34620525 | 0.72673466  | 0.000995503 | 48.63701596 |
| GIPC1         | NM_202470    | 66.77477667 | 3.58413326  | 8.93E-06    | 18.63066238 |
| TOMM20        | NM_014765    | 85.71428571 | 3.871569717 | 6.92E-08    | 22.13941424 |
| ZNF652        | NM_001145365 | 60.79536822 | 1.142705475 | 6.57E-07    | 53.20300772 |
| GTPBP3        | NM_032620    | 113.2844306 | 19.71862114 | 2.27E-06    | 5.745048288 |
| ZNF304        | NM_020657    | 40.79536822 | 2.022834753 | 0.000298828 | 20.16742502 |
| S1PR5         | NM_030760    | 107.3050222 | 0.418774141 | 1.39E-15    | 256.2360269 |
| RNF187        | NM_001010858 | 48.57142857 | 2.321876046 | 2.97E-05    | 20.9190446  |
| BNIP1         | NM_013980    | 40.26512274 | 0.513348141 | 1.49E-05    | 78.43628817 |
| ALG5          | NM_001142364 | 112.2239396 | 1.784167483 | 1.15E-11    | 62.8998907  |
| HN1L          | NM_144570    | 78.46847084 | 3.1646393   | 7.82E-08    | 24.79539164 |
| MUM1          | NM_032853    | 45.97940845 | 2.802973799 | 0.000218624 | 16.40379531 |
| KIAA1524      | NM_020890    | 98.73359358 | 1.299144477 | 6.17E-11    | 75.99893263 |
| MAPKAPK3      | NM_001243925 | 69.36679679 | 2.299722713 | 7.27E-07    | 30.16311332 |
| TYW5          | NM_001039693 | 241.5907364 | 3.426141971 | 1.69E-26    | 70.5139304  |
| PNPLA8        | NM_001256010 | 65.50837026 | 1.123794026 | 1.25E-06    | 58.2921503  |
| ARL8A         | NM_001256129 | 98.2033481  | 5.045014298 | 1.21E-08    | 19.46542513 |
| ZNF33A        | NM_001278176 | 80.26512274 | 1.380965897 | 3.19E-08    | 58.12245106 |
| COX5B         | NM_001862    | 140         | 12.15676687 | 3.32E-10    | 11.51621985 |
| RNF141        | NM_016422    | 149.3667968 | 2.323542889 | 1.41E-16    | 64.28407132 |
| ACBD5         | NR_073196    | 107.0398994 | 1.551541049 | 3.01E-11    | 68.9894086  |
| MAGEA2        | NM_005361    | 97.93822536 | 11.47305579 | 2.15E-06    | 8.536367918 |
| SMG1P1        | NR_027154    | 156.6718189 | 1.493742545 | 2.88E-17    | 104.8854232 |
| RPS6KB1       | NM_001272044 | 133.0193079 | 1.677510062 | 3.09E-14    | 79.29568403 |
| ZFYVE26       | NM_015346    | 60.26512274 | 0.590134824 | 2.72E-07    | 102.1209396 |
| SPATA6L       | NM_001039395 | 35.08108251 | 2.11925906  | 0.004235871 | 16.55346586 |
| NDUFC2        | NM_001204055 | 69.36679679 | 6.280851198 | 2.48E-05    | 11.04417134 |
| ISOC2         | NM_001136201 | 97.93822536 | 3.603391158 | 1.98E-09    | 27.17945987 |
| C2orf69       | NM_153689    | 138.7335936 | 0.953500412 | 5.96E-19    | 145.4992486 |
| PMPCB         | NM_004279    | 111.9588169 | 3.529929008 | 4.10E-11    | 31.71701659 |
| NCOA3         | NM_001174087 | 133.2844306 | 0.32426674  | 9.95E-17    | 411.0333079 |
| ZUFSP         | NM_145062    | 72.75418513 | 2.150801949 | 3.31E-07    | 33.82653859 |
| EPHX4         | NM_173567    | 54.81595977 | 0.892153467 | 1.03E-05    | 61.44229863 |
| CYP51A1       | NM_000786    | 138.4684708 | 2.399832925 | 1.69E-14    | 57.69921288 |
| TMEM171       | NM_173490    | 81.06049096 | 4.297536255 | 1.30E-07    | 18.86208426 |
| MEF2BNB-MEF2B | NR_027307    | 78.99871632 | 4.31875034  | 8.48E-07    | 18.29203128 |
| GTF3C5        | NM_001286709 | 164.713002  | 4.037627467 | 1.40E-16    | 40.79450207 |
| MRPL55        | NM_181441    | 61.3256137  | 9.41679155  | 0.001458596 | 6.512368185 |
| FAM96A        | NM_001014812 | 75.34620525 | 2.437405505 | 9.41E-08    | 30.91246208 |
| ZNF189        | NM_197977    | 57.93822536 | 2.192590651 | 3.36E-06    | 26.42455185 |
| REXO2         | NM_015523    | 86.24453119 | 2.883020414 | 9.24E-09    | 29.91464465 |
| STXBP5-AS1    | NR_034115    | 31.95881691 | 0.072297043 | 0.000651647 | 442.0487446 |
| POLD3         | NR_046409    | 29.69112681 | 1.200963748 | 0.002121421 | 24.72275025 |
| RALGPS1       | NM_001190730 | 111.9588169 | 0.219170415 | 1.74E-13    | 510.8299718 |
| CASP7         | NM_001267056 | 93.54955335 | 2.9534489   | 2.67E-09    | 31.67468154 |
| SERBP1        | NM_001018067 | 90.42728775 | 5.871712922 | 2.28E-07    | 15.40049538 |
| SPOCK3        | NM_001204356 | 51.69369417 | 0.014182662 | 1.22E-07    | 3644.851408 |
| ALCAM         | NM_001243281 | 81.85585918 | 0.893841381 | 3.42E-09    | 91.57761203 |
| FIP1L1        | NM_030917    | 104.1827566 | 0.3882602   | 2.75E-13    | 268.3323104 |
| KPTN          | NR_111923    | 47.83526763 | 4.183171717 | 0.000358436 | 11.43516711 |
| LINC01315     | NR_120595    | 121.3256137 | 4.846041796 | 1.99E-11    | 25.03602297 |
| NADSYN1       | NM_018161    | 109.1016741 | 0.096213955 | 8.06E-18    | 1133.948546 |
| NPTN          | NM_001161364 | 54.28571429 | 1.101836862 | 2.92E-06    | 49.26837734 |
| PBRM1         | NM_018313    | 97.93822536 | 0.448807254 | 1.42E-11    | 218.2189003 |
| CLCN2         | NM_004366    | 211.4285714 | 3.195034688 | 1.56E-23    | 66.1741083  |
| FLVCR1-AS1    | NR_027286    | 112.4890624 | 8.421308253 | 4.97E-08    | 13.35767069 |
| RNF19B        | NM_001300826 | 149.1016741 | 1.840706935 | 3.77E-17    | 81.00239706 |
| FAM111A       | NM_001142521 | 57.93822536 | 4.786752427 | 6.49E-05    | 12.10386922 |

|              |              |             |             |             |             |
|--------------|--------------|-------------|-------------|-------------|-------------|
| MAGEF1       | NM_022149    | 153.0193079 | 15.10199796 | 5.77E-10    | 10.13238833 |
| ZNF655       | NM_024061    | 117.9382254 | 4.614578411 | 2.39E-11    | 25.55774653 |
| RBKS         | NM_022128    | 58.46847084 | 0.066849323 | 1.43E-08    | 874.6307122 |
| TBC1D1       | NM_001253912 | 65.91763382 | 1.247249573 | 7.01E-07    | 51.24686768 |
| CAV2         | NM_198212    | 38.73359358 | 4.659557101 | 0.003048421 | 8.312720018 |
| PIGG         | NM_001289055 | 134.8159598 | 1.730482176 | 8.00E-16    | 77.90658673 |
| DENND1B      | NM_001300858 | 108.5714286 | 0.259112407 | 4.04E-13    | 419.0128521 |
| ZNF195       | NR_040083    | 101.3256137 | 3.794813399 | 1.91E-09    | 26.70107936 |
| TMEM147      | NM_032635    | 123.9176338 | 4.955235185 | 3.89E-11    | 25.00741724 |
| FIGNL1       | NM_001287494 | 64.18275656 | 0.13843883  | 4.14E-10    | 463.6181661 |
| ZFYVE28      | NM_001172656 | 83.38738834 | 1.047431273 | 3.21E-09    | 79.61132198 |
| PLA2G12A     | NM_030821    | 98.73359358 | 1.612858697 | 1.32E-11    | 61.21651807 |
| VDAC2        | NR_033675    | 71.95881691 | 6.434708443 | 2.20E-05    | 11.18291801 |
| KANSL3       | NM_001115016 | 66.24453119 | 2.80002613  | 2.54E-06    | 23.65854035 |
| CEP78        | NM_001098802 | 138.7335936 | 1.482384373 | 2.45E-16    | 93.58813823 |
| CAMK2D       | NM_172128    | 63.38738834 | 0.975391658 | 6.97E-07    | 64.98660081 |
| SSR1         | NR_120448    | 78.46847084 | 4.408002209 | 1.24E-06    | 17.80136831 |
| EPS15L1      | NR_047666    | 65.97940845 | 2.071450901 | 3.57E-06    | 31.85178486 |
| NOD1         | NM_006092    | 149.8970423 | 1.066955697 | 6.61E-17    | 140.490409  |
| ZBED8        | NM_022090    | 214.8159598 | 4.258037137 | 5.41E-24    | 50.44952706 |
| SLCO5A1      | NM_030958    | 35.61132799 | 0.215101294 | 0.000355038 | 165.5560844 |
| ACTR10       | NM_018477    | 92.75418513 | 1.039209367 | 2.96E-10    | 89.25456992 |
| BAHD1        | NM_014952    | 40.79536822 | 2.956185165 | 0.000970407 | 13.80000438 |
| HAUS2        | NM_001130447 | 157.9382254 | 2.491621083 | 4.03E-17    | 63.38773839 |
| ANKFY1       | NM_001257999 | 72.22393965 | 1.882345868 | 8.45E-07    | 38.36911212 |
| HSPBP1       | NM_012267    | 37.67310262 | 1.085875052 | 0.000767477 | 34.69377306 |
| GPATCH3      | NM_022078    | 87.83526763 | 2.936513116 | 2.91E-09    | 29.91141676 |
| EI24         | NM_004879    | 155.0810825 | 3.203331905 | 6.16E-17    | 48.41243028 |
| CTBP2        | NM_001329    | 72.22393965 | 4.840754729 | 9.05E-06    | 14.91997502 |
| ITGA2        | NR_073103    | 121.5907364 | 1.813455282 | 3.12E-12    | 67.04920582 |
| NFATC3       | NM_173163    | 138.4684708 | 0.455857281 | 1.38E-16    | 303.7539962 |
| AP2S1        | NM_021575    | 78.46847084 | 12.93418502 | 9.74E-05    | 6.066750298 |
| LINC00339    | NR_023919    | 68.36551311 | 14.31136117 | 0.000914767 | 4.777009839 |
| CPPED1       | NM_001099455 | 140.2651227 | 0.589602321 | 1.81E-16    | 237.8978469 |
| SNAPC2       | NM_003083    | 155.0810825 | 17.77796165 | 8.07E-10    | 8.723220667 |
| NUP50        | NM_007172    | 61.06049096 | 2.774432598 | 5.95E-06    | 22.00828054 |
| PDE4DIP      | NM_001198832 | 42.71043468 | 1.451922257 | 0.0006999   | 29.41647494 |
| EIF1         | NM_005801    | 200.0592073 | 27.28989862 | 1.85E-11    | 7.330888623 |
| USP21        | NM_001014443 | 106.7747767 | 1.829608195 | 2.24E-12    | 58.35936729 |
| KRT8         | NM_001256293 | 56.93694168 | 9.378631759 | 0.000676266 | 6.070921979 |
| GNA13        | NM_006572    | 157.9382254 | 1.053289503 | 2.25E-18    | 149.9475927 |
| FAM53B       | NM_014661    | 48.57142857 | 0.983884228 | 1.66E-05    | 49.36701616 |
| SCARB1       | NM_005505    | 137.6731026 | 2.827215336 | 1.42E-13    | 48.69565501 |
| ST6GAL1      | NM_173216    | 82.38610466 | 0.291813102 | 3.48E-10    | 282.3248994 |
| FGFR4        | NM_001291980 | 183.6525111 | 7.043700377 | 1.93E-17    | 26.07329972 |
| SLC22A18     | NM_002555    | 91.69369417 | 5.528673336 | 3.59E-08    | 16.58511701 |
| IFT122       | NM_052990    | 61.59073644 | 0.857448805 | 2.49E-07    | 71.83022018 |
| SDCBP        | NM_001007069 | 140.5302455 | 0.981517827 | 2.18E-17    | 143.1764575 |
| FRMD5        | NM_001286491 | 95.61132799 | 1.681027994 | 7.07E-09    | 56.87670184 |
| SPRED2       | NM_181784    | 75.61132799 | 2.453524518 | 5.48E-07    | 30.81743322 |
| CEBPA-AS1    | NR_026887    | 103.3873883 | 14.61214012 | 5.08E-06    | 7.075444631 |
| MINOS1-NBL1  | NM_001204089 | 95.34620525 | 2.524948527 | 2.71E-09    | 37.76164316 |
| HJURP        | NM_001282962 | 89.89704227 | 5.354015322 | 4.83E-08    | 16.79058368 |
| TMEM175      | NM_032326    | 96.67181894 | 0.674220616 | 3.55E-12    | 143.3830658 |
| LOC100129361 | NM_001271592 | 147.0398994 | 8.70811466  | 4.46E-12    | 16.88538853 |
| TMEM217      | NR_104442    | 58.46847084 | 3.583310164 | 2.30E-05    | 16.31688806 |
| LRCH4        | NM_002319    | 115.0810825 | 2.271710995 | 8.43E-13    | 50.65832878 |
| FADS1        | NM_013402    | 137.1428571 | 16.24813817 | 8.75E-09    | 8.440527506 |
| ATXN1        | NM_000332    | 46.50965393 | 0.0831008   | 1.52E-05    | 559.677573  |
| PHYKPL       | NR_103509    | 115.3462052 | 12.61879629 | 7.32E-08    | 9.140824737 |
| STEAP2       | NM_152999    | 104.1827566 | 2.109923031 | 3.22E-11    | 49.37751522 |
| CYFIP2       | NM_001291721 | 74.55083703 | 1.27648035  | 3.87E-07    | 58.40343491 |
| EEF1E1       | NM_004280    | 115.0810825 | 3.118534977 | 3.11E-11    | 36.90229013 |
| FBXO16       | NM_001258211 | 76.14157347 | 1.080910292 | 6.70E-08    | 70.44208386 |

|             |              |             |             |             |             |
|-------------|--------------|-------------|-------------|-------------|-------------|
| DNM1        | NM_001005336 | 95.61132799 | 4.853932488 | 3.74E-08    | 19.69770454 |
| NUDT2       | NM_001244390 | 98.46847084 | 2.608773489 | 4.90E-10    | 37.74512093 |
| VPS29       | NM_001282151 | 121.8558592 | 1.289136226 | 1.24E-15    | 94.52519967 |
| VCL         | NM_014000    | 170.4272878 | 2.583392982 | 5.76E-17    | 65.97033009 |
| PRMT1       | NM_198318    | 72.75418513 | 6.355539307 | 1.20E-05    | 11.44736609 |
| SCRN2       | NM_001145023 | 96.40669621 | 8.799375635 | 2.10E-07    | 10.95608373 |
| PPP1R15B    | NM_032833    | 141.5907364 | 1.697050613 | 1.62E-17    | 83.43341991 |
| ZNF707      | NM_001288808 | 110.6924105 | 0.424823352 | 6.61E-17    | 260.561031  |
| SMC6        | NM_001142286 | 151.6936942 | 0.300335148 | 1.16E-20    | 505.0813897 |
| SLC1A3      | NM_001166695 | 65.71428571 | 1.200173554 | 2.06E-06    | 54.75398578 |
| EML3        | NM_001300794 | 65.97940845 | 8.186365289 | 0.000202947 | 8.0596707   |
| KANTR       | NR_110456    | 77.40797988 | 0.100841586 | 2.28E-12    | 767.6196228 |
| SYF2        | NM_207170    | 43.91763382 | 0.560868422 | 2.50E-05    | 78.30291761 |
| PI4K2A      | NM_018425    | 61.06049096 | 2.180119179 | 6.92E-06    | 28.00786835 |
| COPS8       | NM_006710    | 63.65251108 | 3.869716549 | 1.37E-05    | 16.44888205 |
| PPAP2A      | NM_176895    | 163.1222656 | 0.523836455 | 3.42E-20    | 311.3992239 |
| RASSF6      | NM_001270392 | 92.48906239 | 0.286444369 | 4.59E-13    | 322.8866488 |
| N6AMT2      | NM_174928    | 177.9382254 | 2.127977761 | 2.13E-19    | 83.61846097 |
| SVIL-AS1    | NR_110925    | 108.1003904 | 1.255726595 | 1.59E-11    | 86.08592893 |
| SF3A1       | NM_001005409 | 135.8764507 | 3.272514875 | 9.55E-14    | 41.52049904 |
| CYCS        | NM_018947    | 58.2033481  | 8.533824586 | 0.000920015 | 6.82031222  |
| ELMO3       | NM_024712    | 119.2638391 | 8.401749934 | 1.09E-09    | 14.19511887 |
| GGA1        | NM_013365    | 69.10167405 | 5.333597391 | 8.69E-06    | 12.95592243 |
| ZNF200      | NM_001145448 | 70.42728775 | 4.209472123 | 1.64E-06    | 16.73066971 |
| METTL15     | NM_001113528 | 58.73359358 | 0.68231287  | 1.04E-06    | 86.08014913 |
| CKLF-CMTM1  | NM_001204099 | 58.2033481  | 3.251570903 | 1.55E-05    | 17.90007041 |
| TPM3        | NM_001278189 | 152.4890624 | 4.117489055 | 7.02E-15    | 37.03447911 |
| CAPN10-AS1  | NR_103792    | 81.85585918 | 5.451473153 | 7.16E-07    | 15.015365   |
| MED27       | NM_001253881 | 53.54955335 | 0.972756645 | 4.98E-06    | 55.04928046 |
| IFI27L1     | NM_145249    | 44.71300204 | 0.160211432 | 1.95E-07    | 279.0874621 |
| ELMO2       | NM_182764    | 97.93822536 | 2.096982446 | 4.78E-10    | 46.7043611  |
| EIF1AX      | NM_001412    | 86.77477667 | 1.504976229 | 5.74E-10    | 57.65856961 |
| ZNF286A     | NM_001288649 | 81.59073644 | 4.296569452 | 1.89E-07    | 18.98973992 |
| RASSF8      | NM_007211    | 31.69369417 | 1.092745814 | 0.001245276 | 29.00372049 |
| UNC45A      | NM_001039675 | 112.4890624 | 12.7551915  | 1.32E-07    | 8.819080635 |
| TMEM177     | NM_001105199 | 126.5096539 | 8.866620103 | 5.50E-10    | 14.26808101 |
| FAM222B     | NM_001288637 | 154.550837  | 1.205983778 | 1.75E-16    | 128.1533299 |
| INPP4B      | NM_001101669 | 38.2033481  | 0.139179672 | 0.00028857  | 274.4894246 |
| ECHDC1      | NM_001105545 | 112.2239396 | 1.517475768 | 9.89E-12    | 73.95435369 |
| GARS        | NM_002047    | 67.30502215 | 3.800636435 | 9.43E-06    | 17.708882   |
| CRLF3       | NR_073118    | 172.7541851 | 2.669968889 | 2.25E-18    | 64.70269592 |
| SLC44A2     | NM_020428    | 124.1827566 | 4.620167867 | 5.65E-12    | 26.87840791 |
| METTL4      | NM_022840    | 52.48906239 | 1.043109062 | 2.83E-05    | 50.31982206 |
| DKC1        | NM_001363    | 57.40797988 | 2.829532277 | 7.22E-06    | 20.28885846 |
| QDPR        | NM_000320    | 86.24453119 | 0.489728709 | 5.08E-11    | 176.1067498 |
| COMMD3-BM1I | NM_001204062 | 120.7953682 | 5.548922786 | 7.90E-11    | 21.76915644 |
| HMGB1       | NM_002128    | 117.4079799 | 6.902296139 | 1.98E-10    | 17.00998878 |
| TMEM63C     | NM_020431    | 106.2445312 | 1.475094032 | 9.28E-11    | 72.02559899 |
| MRPL49      | NR_037568    | 112.7541851 | 14.34122398 | 2.13E-07    | 7.86224281  |
| HMOX2       | NM_001286267 | 144.4478793 | 2.12394957  | 4.25E-16    | 68.00909085 |
| MC4R        | NM_005912    | 46.24453119 | 5.929941664 | 0.003970493 | 7.798479954 |
| SRP19       | NM_001204194 | 57.20206442 | 2.035380197 | 7.61E-06    | 28.10387195 |
| LAMTOR2     | NM_001145264 | 95.61132799 | 8.226283151 | 4.53E-07    | 11.62266436 |
| SERTAD2     | NM_014755    | 183.3873883 | 4.301311179 | 6.40E-19    | 42.63522929 |
| TMEM51      | NM_001136216 | 63.65251108 | 3.778283025 | 7.26E-06    | 16.84694097 |
| PICK1       | NM_001039584 | 67.30502215 | 2.183443152 | 2.87E-07    | 30.82517724 |
| CBX3        | NM_016587    | 134.550837  | 6.11654673  | 1.11E-12    | 21.99784339 |
| DIS3L2      | NM_001257281 | 82.12098192 | 0.623107319 | 4.62E-09    | 131.7926775 |
| AARSD1      | NM_001261434 | 123.1222656 | 4.855391211 | 1.92E-11    | 25.35784662 |
| NEK7        | NM_133494    | 98.2033481  | 1.257547382 | 1.88E-09    | 78.09117133 |
| SLC35B3     | NR_109914    | 117.9382254 | 1.092769836 | 1.57E-14    | 107.9259524 |
| PBLD        | NM_001033083 | 43.91763382 | 1.583390422 | 0.000476904 | 27.73645287 |
| NPEPL1      | NM_024663    | 23.1222656  | 0.263085078 | 0.002923898 | 87.88892833 |
| GCOM1       | NM_001285900 | 83.1222656  | 1.055105118 | 2.67E-09    | 78.78102777 |

|            |              |             |             |             |             |
|------------|--------------|-------------|-------------|-------------|-------------|
| GDI1       | NM_001493    | 49.10167405 | 5.099489093 | 0.001223677 | 9.628743812 |
| CLDND1     | NM_019895    | 101.3256137 | 12.1103443  | 1.34E-06    | 8.36686482  |
| NDRG4      | NM_001242836 | 64.4478793  | 8.654558239 | 0.000252253 | 7.446697742 |
| WDTC1      | NM_015023    | 31.95881691 | 0.048575985 | 8.52E-05    | 657.9139241 |
| NAA10      | NM_001256119 | 45.71428571 | 3.486399929 | 0.000336274 | 13.11217492 |
| TRIB3      | NM_021158    | 55.08108251 | 5.252097448 | 0.000179055 | 10.48744488 |
| NUTM2B-AS1 | NR_120613    | 54.55083703 | 1.385772928 | 4.73E-05    | 39.36491754 |
| SETD4      | NM_017438    | 97.93822536 | 3.246047466 | 4.47E-09    | 30.17153211 |
| QTRTD1     | NM_024638    | 50.16216501 | 0.56572722  | 9.12E-07    | 88.66846647 |
| SPECC1     | NM_001033555 | 69.63191953 | 0.428379676 | 5.11E-08    | 162.5472063 |
| FAM3A      | NM_001171134 | 92.48906239 | 2.403386572 | 6.22E-10    | 38.48280733 |
| ZNF2       | NM_001017396 | 100.7953682 | 1.792408373 | 1.48E-11    | 56.23460017 |
| EMX1       | NM_004097    | 63.65251108 | 2.600329746 | 1.73E-06    | 24.47863052 |
| MICAL2     | NM_001282668 | 57.40797988 | 1.886698028 | 2.42E-05    | 30.4277521  |
| EEFSEC     | NM_021937    | 95.34620525 | 1.50632719  | 5.97E-09    | 63.29714146 |
| CARHSP1    | NM_001278260 | 198.2033481 | 11.05726099 | 1.54E-16    | 17.92517588 |
| HM13       | NM_178580    | 141.5907364 | 6.360618444 | 5.72E-12    | 22.2605298  |
| GMIP       | NM_001288999 | 162.6512274 | 2.541445101 | 6.13E-19    | 63.99950459 |
| CDK16      | NM_006201    | 77.93822536 | 4.169427244 | 2.70E-07    | 18.69278939 |
| SLC33A1    | NM_004733    | 139.5289618 | 0.176845066 | 8.41E-22    | 788.9898462 |
| BCL7B      | NM_001707    | 69.10167405 | 1.238794544 | 1.18E-07    | 55.78138393 |
| CNOT1      | NR_049763    | 117.9382254 | 1.602256245 | 1.12E-11    | 73.60759286 |
| C14orf2    | NM_004894    | 135.3462052 | 3.333576143 | 2.32E-14    | 40.60090409 |
| BAMBI      | NM_012342    | 152.2239396 | 11.38158145 | 5.64E-12    | 13.37458597 |
| TSPAN13    | NM_014399    | 143.6525111 | 2.082556089 | 5.73E-16    | 68.9789398  |
| CRELD1     | NM_015513    | 113.8146761 | 5.125938596 | 1.30E-10    | 22.20367528 |
| ACADSB     | NM_001609    | 139.5289618 | 0.479080405 | 7.12E-18    | 291.2433077 |
| DCP1A      | NM_001290206 | 149.8970423 | 1.212846845 | 2.64E-16    | 123.5910724 |
| TYSND1     | NM_001040273 | 98.73359358 | 11.83525624 | 4.41E-07    | 8.342328344 |
| OXSM       | NR_026937    | 95.61132799 | 6.071234049 | 1.46E-08    | 15.7482527  |
| DNM3       | NM_001278252 | 134.550837  | 0.028902559 | 3.14E-21    | 4655.326149 |
| PLK4       | NM_001190801 | 81.59073644 | 2.043514669 | 3.58E-09    | 39.92667031 |
| STK16      | NR_026909    | 143.9176338 | 11.91075004 | 3.72E-11    | 12.08300345 |
| PPWD1      | NM_001278929 | 89.36679679 | 1.031698894 | 2.04E-10    | 86.62100665 |
| CAGE1      | NM_205864    | 144.4478793 | 0.550591301 | 3.92E-19    | 262.3504566 |
| MED15      | NM_001293234 | 87.30502215 | 2.517296987 | 1.45E-08    | 34.68205086 |
| CXorf56    | NM_022101    | 38.2033481  | 0.850089546 | 0.000110099 | 44.94038103 |
| SUPT5H     | NM_003169    | 98.2033481  | 1.897876612 | 2.01E-10    | 51.74380015 |
| METTTL22   | NM_024109    | 161.5907364 | 1.845860848 | 2.04E-19    | 87.54220917 |
| SPC25      | NM_020675    | 67.03989941 | 0.206886218 | 1.14E-10    | 324.0423653 |
| ZNF627     | NM_001290084 | 193.0193079 | 1.284518227 | 3.22E-24    | 150.2659159 |
| DCLK2      | NR_036614    | 71.95881691 | 0.868030767 | 5.83E-08    | 82.89892435 |
| TUBB4B     | NM_006088    | 169.3667968 | 22.75446077 | 8.55E-10    | 7.443234912 |
| PRKAG2     | NM_024429    | 69.10167405 | 1.483780779 | 1.15E-06    | 46.57135005 |
| USB1       | NM_024598    | 196.1415735 | 1.729190034 | 6.41E-24    | 113.4297386 |
| SGOL1      | NM_001012409 | 84.18275656 | 1.32313193  | 9.61E-10    | 63.62385688 |
| MAEA       | NM_001297431 | 77.67310262 | 1.9055939   | 1.11E-07    | 40.76057475 |
| C9orf16    | NM_024112    | 127.0398994 | 13.76522241 | 7.28E-09    | 9.229048078 |
| TWF1       | NR_073473    | 146.7747767 | 1.08841963  | 3.30E-19    | 134.8512767 |
| PPIL6      | NM_001111298 | 127.5701449 | 0.190404889 | 9.39E-20    | 669.9940605 |
| TMPO       | NM_001032283 | 115.0810825 | 1.496333862 | 1.04E-12    | 76.90869359 |
| FAM136A    | NM_032822    | 135.8764507 | 8.544454662 | 2.69E-11    | 15.90229641 |
| RABL2A     | NM_007082    | 101.060491  | 3.642634649 | 8.77E-10    | 27.74379006 |
| FOXN2      | NM_002158    | 89.10167405 | 1.206154711 | 4.11E-09    | 73.87250842 |
| IL6ST      | NM_001190981 | 165.5083703 | 0.88023772  | 2.05E-19    | 188.0269007 |
| SRRM1      | NM_005839    | 50.69241049 | 3.632401215 | 7.32E-05    | 13.95561985 |
| OSCAR      | NM_130771    | 47.03989941 | 2.049751844 | 5.00E-05    | 22.94907042 |
| TEAD2      | NM_001256660 | 97.40797988 | 5.153074847 | 7.37E-09    | 18.90288474 |
| KIAA1191   | NR_109798    | 164.4478793 | 6.308758014 | 8.02E-16    | 26.06660121 |
| UXS1       | NM_025076    | 149.3667968 | 1.226846088 | 1.55E-15    | 121.7486026 |
| SLC2A8     | NM_014580    | 95.08108251 | 1.200399121 | 2.50E-12    | 79.20789082 |
| CHD8       | NM_020920    | 44.4478793  | 0.997924831 | 2.03E-05    | 44.54030797 |
| IFNLR1     | NM_170743    | 97.93822536 | 1.084827562 | 4.80E-11    | 90.2799936  |
| AP3M2      | NM_001134296 | 69.63191953 | 2.939368633 | 4.65E-07    | 23.68941369 |



|              |              |             |             |             |             |
|--------------|--------------|-------------|-------------|-------------|-------------|
| MKNK1        | NM_001135553 | 173.0193079 | 2.449144506 | 1.09E-18    | 70.64479351 |
| PSTPIP2      | NM_024430    | 69.10167405 | 0.615296978 | 3.61E-08    | 112.3062139 |
| RFC2         | NM_181471    | 109.6319195 | 4.476751005 | 3.42E-10    | 24.4891707  |
| ACSF2        | NM_001288971 | 125.9794085 | 2.055558626 | 3.40E-13    | 61.28718826 |
| UQCR11       | NM_006830    | 109.8970423 | 8.072653021 | 4.94E-09    | 13.61349757 |
| DNLZ         | NM_001080849 | 103.1222656 | 22.41683148 | 0.000148974 | 4.600215945 |
| EEF1D        | NM_001130057 | 92.01802419 | 7.315271078 | 2.20E-07    | 12.57889465 |
| PTGR1        | NM_001146109 | 52.48906239 | 2.306154796 | 7.52E-05    | 22.76042462 |
| TK2          | NM_001272050 | 107.5701449 | 0.953040861 | 2.19E-12    | 112.8704437 |
| NEK4         | NM_001193533 | 143.9176338 | 0.939786458 | 3.04E-16    | 153.1386546 |
| TOR1B        | NM_014506    | 203.3873883 | 6.295260079 | 2.32E-20    | 32.30801997 |
| GNG5         | NM_005274    | 113.0193079 | 8.395501326 | 6.12E-09    | 13.46188911 |
| PYGB         | NM_002862    | 215.3462052 | 2.24838896  | 1.52E-23    | 95.7780033  |
| CLUL1        | NM_001289036 | 50.16216501 | 0.984048362 | 4.21E-06    | 50.97530462 |
| LOC100289495 | NR_040022    | 93.54955335 | 0.299563689 | 1.02E-14    | 312.2860242 |
| CCNJ         | NM_019084    | 87.30502215 | 1.121955631 | 7.75E-11    | 77.81503984 |
| UBE3C        | NM_014671    | 75.08108251 | 2.775532206 | 5.92E-07    | 27.05105794 |
| SNPH         | NM_014723    | 26.50965393 | 0.903581869 | 0.00387543  | 29.33840846 |
| CATIP-AS1    | NR_110573    | 178.2033481 | 34.47075926 | 4.84E-07    | 5.169696054 |
| MEPCE        | NM_001194991 | 212.4890624 | 39.63642229 | 3.34E-10    | 5.360954651 |
| ITPA         | NM_033453    | 69.89704227 | 3.733510338 | 3.33E-06    | 18.72153441 |
| TSPYL4       | NM_021648    | 89.89704227 | 6.500601639 | 3.55E-07    | 13.82903418 |
| APBB1        | NR_047512    | 33.28443061 | 1.207453621 | 0.002338344 | 27.56580463 |
| CPB2-AS1     | NR_046227    | 47.30502215 | 0.841539095 | 7.28E-06    | 56.21250684 |
| TAF1A-AS1    | NR_110614    | 55.61132799 | 0.595036619 | 8.47E-07    | 93.45866493 |
| STX6         | NM_001286210 | 77.93822536 | 1.362347745 | 6.86E-08    | 57.20876014 |
| SNX17        | NM_001267059 | 50.42728775 | 9.368329008 | 0.003354936 | 5.382740904 |
| SENP8        | NM_145204    | 107.0398994 | 1.489829337 | 2.52E-12    | 71.84708795 |
| C15orf40     | NM_001160113 | 89.89704227 | 3.323054    | 5.18E-09    | 27.0525373  |
| PQLC2        | NM_017765    | 103.6525111 | 0.667155139 | 5.58E-14    | 155.3649295 |
| SEC13        | NM_001278946 | 132.4890624 | 7.460517862 | 1.46E-11    | 17.75869515 |
| SUCO         | NM_014283    | 149.1016741 | 0.322038023 | 1.81E-20    | 462.9940044 |
| PRPF38A      | NM_032864    | 56.40669621 | 3.753321054 | 5.80E-05    | 15.02847622 |
| ADAM15       | NR_048577    | 143.6525111 | 5.35627783  | 5.23E-14    | 26.81946599 |
| C2CD3        | NM_001286577 | 55.08108251 | 1.158808661 | 4.71E-06    | 47.53250847 |
| ZNF629       | NM_001080417 | 47.30502215 | 5.267603154 | 0.000427353 | 8.980369396 |
| SLC38A3      | NM_006841    | 43.91763382 | 0.503168757 | 4.08E-05    | 87.28211597 |
| RAB5B        | NM_001252036 | 52.22393965 | 2.685023489 | 4.91E-05    | 19.4500867  |
| LMCD1        | NM_001278234 | 37.67310262 | 0.673937767 | 0.00018728  | 55.89997247 |
| C9orf69      | NM_001256526 | 77.40797988 | 14.00913828 | 0.000265796 | 5.525534713 |
| TANGO2       | NM_001283148 | 157.6731026 | 0.807390013 | 3.06E-19    | 195.2874077 |
| NFATC2       | NM_012340    | 44.71300204 | 0.72485343  | 3.30E-05    | 61.68557694 |
| CTNNBIP1     | NM_001012329 | 37.40797988 | 1.324172521 | 0.001929278 | 28.25008018 |
| RPL17        | NM_001199345 | 178.2033481 | 14.82105978 | 3.92E-13    | 12.02365761 |
| AVPII        | NM_021732    | 116.1415735 | 6.153890317 | 3.93E-10    | 18.87287025 |
| ARMC3        | NM_001282747 | 44.4478793  | 0.744665878 | 2.80E-05    | 59.68835234 |
| PEX1         | NM_001282677 | 126.5096539 | 0.266524596 | 4.67E-19    | 474.6640875 |
| MAP3K11      | NM_002419    | 101.8558592 | 4.88675263  | 8.71E-10    | 20.84326073 |
| PXMP4        | NM_183397    | 38.99871632 | 0.872655573 | 0.000256401 | 44.68970064 |
| SNX14        | NR_123729    | 109.3667968 | 1.23624545  | 4.01E-11    | 88.46689527 |
| PPP1R8       | NM_014110    | 127.3050222 | 2.849383104 | 3.12E-13    | 44.67809962 |
| NTMT1        | NM_001286798 | 171.4877787 | 9.216503691 | 6.37E-15    | 18.60659795 |
| PHOSPHO1     | NM_178500    | 129.8970423 | 3.22399926  | 3.58E-14    | 40.29065511 |
| PDCD10       | NM_145859    | 135.8764507 | 0.192200509 | 3.66E-21    | 706.9515652 |
| PTEN         | NM_000314    | 98.99871632 | 1.595680941 | 7.28E-10    | 62.04167373 |
| GNG10        | NM_001017998 | 138.7335936 | 5.96531008  | 3.81E-13    | 23.25672793 |
| ITGA3        | NM_002204    | 96.67181894 | 13.46861486 | 3.09E-06    | 7.177562054 |
| NOLC1        | NM_001284389 | 79.5289618  | 8.818474891 | 1.03E-05    | 9.018448517 |
| DHX33        | NM_020162    | 57.93822536 | 2.632212456 | 1.36E-05    | 22.0112268  |
| PRR14        | NM_024031    | 95.87645073 | 12.15166816 | 1.42E-06    | 7.889982633 |
| NEDD1        | NM_152905    | 121.8558592 | 0.480385423 | 6.12E-17    | 253.6626911 |
| FAM72C       | NM_001287385 | 95.93565801 | 7.778857816 | 5.73E-08    | 12.33287203 |
| FAM109A      | NM_144671    | 89.63191953 | 3.116876599 | 2.02E-09    | 28.75696765 |
| FAM134A      | NM_024293    | 72.22393965 | 4.585818347 | 3.51E-06    | 15.74941138 |

|              |              |             |             |             |             |
|--------------|--------------|-------------|-------------|-------------|-------------|
| SLC9A5       | NM_004594    | 73.01930787 | 5.661472296 | 2.28E-06    | 12.89758283 |
| HIP1         | NM_001243198 | 55.34620525 | 0.947809918 | 4.82E-06    | 58.39378148 |
| POLR3H       | NM_001282885 | 80.32433002 | 6.590390885 | 2.95E-06    | 12.18809801 |
| MAFB         | NM_005461    | 58.46847084 | 0.907021772 | 2.54E-07    | 64.46203682 |
| TRMT10C      | NM_017819    | 104.1827566 | 3.628688619 | 1.98E-10    | 28.71085604 |
| MED25        | NM_030973    | 152.2239396 | 1.0825423   | 4.33E-20    | 140.6170822 |
| ALG3         | NM_001006941 | 64.18275656 | 13.74932296 | 0.003079526 | 4.668066694 |
| LIMCH1       | NM_001289122 | 66.24453119 | 0.332102254 | 1.94E-07    | 199.4702848 |
| STARD3NL     | NM_032016    | 95.87645073 | 0.45919096  | 5.68E-13    | 208.7942905 |
| METTLL13     | NM_014955    | 41.85585918 | 0.336920419 | 1.57E-06    | 124.2306991 |
| SF3B6        | NM_016047    | 109.8970423 | 6.955251428 | 4.00E-09    | 15.80058513 |
| TGFBR3       | NM_001195683 | 103.9176338 | 1.019523997 | 2.85E-11    | 101.9275997 |
| STX1A        | NM_004603    | 91.69369417 | 7.355365836 | 2.62E-07    | 12.46623162 |
| ANAPC10      | NM_001256710 | 70.16216501 | 0.328180255 | 6.31E-09    | 213.7915491 |
| STAT6        | NM_001178078 | 73.01930787 | 12.10690814 | 0.000186996 | 6.031210201 |
| LONP1        | NM_004793    | 75.34620525 | 9.644805313 | 6.76E-05    | 7.812102246 |
| PRKAR1A      | NM_212472    | 165.5083703 | 3.118769611 | 1.10E-17    | 53.06848242 |
| APIP         | NM_015957    | 101.060491  | 1.442455628 | 5.47E-11    | 70.06142095 |
| CBX5         | NM_012117    | 83.91763382 | 3.989147822 | 4.28E-07    | 21.03648137 |
| PTER         | NM_030664    | 154.550837  | 2.248803449 | 9.38E-16    | 68.72580931 |
| NDUFB8       | NM_001284368 | 138.9987163 | 9.884386384 | 2.29E-11    | 14.06245273 |
| APOBEC3H     | NM_001166003 | 28.83655131 | 0.163990132 | 0.000553085 | 175.8432111 |
| LOC100289561 | NM_001242713 | 150.4272878 | 2.460359972 | 6.07E-17    | 61.14035729 |
| PSMD8        | NM_002812    | 66.77477667 | 6.630970238 | 3.93E-05    | 10.07013669 |
| KIF3C        | NM_002254    | 34.81595977 | 0.097310661 | 3.97E-05    | 357.7815576 |
| ZNF771       | NM_016643    | 149.1016741 | 11.21800245 | 6.66E-12    | 13.29128557 |
| FAM86B2      | NM_001137610 | 86.77477667 | 4.272887876 | 2.45E-08    | 20.30822694 |
| KHNYN        | NM_001290257 | 150.162165  | 13.2371454  | 2.81E-11    | 11.34399906 |
| DCLRE1B      | NM_022836    | 84.97812478 | 4.805761345 | 1.24E-07    | 17.68255198 |
| LOC101928103 | NR_110292    | 78.2033481  | 0.464712016 | 5.13E-09    | 168.2834646 |
| LRSAM1       | NM_001005373 | 90.16216501 | 3.244307998 | 6.07E-09    | 27.79087715 |
| PDXDC1       | NM_001285448 | 72.54826967 | 3.996956536 | 6.61E-06    | 18.1508778  |
| CCT3         | NM_001008800 | 107.8352676 | 4.438686466 | 5.49E-10    | 24.29440972 |
| CLN3         | NM_001286105 | 49.36679679 | 2.223056669 | 5.57E-05    | 22.20671991 |
| HMGA2        | NM_001300918 | 83.65251108 | 6.540828707 | 7.89E-07    | 12.78928326 |
| DUT          | NM_001025248 | 163.3873883 | 3.725024586 | 2.48E-17    | 43.86209663 |
| MBD1         | NM_001204141 | 67.83526763 | 5.325022794 | 5.43E-06    | 12.73896287 |
| DYNC1I2      | NM_001271787 | 84.71300204 | 0.333308514 | 1.58E-11    | 254.1579303 |
| C11orf80     | NM_024650    | 98.46847084 | 2.387736853 | 2.13E-09    | 41.23924742 |
| TOR2A        | NM_001252018 | 91.69369417 | 1.395184915 | 1.77E-11    | 65.72153496 |
| HOXA1        | NM_153620    | 57.40797988 | 8.567698641 | 0.001087555 | 6.700513439 |
| BRE          | NM_199194    | 105.7142857 | 0.277629259 | 6.18E-12    | 380.7750163 |
| GEMIN7       | NM_001007269 | 136.4066962 | 5.340206734 | 3.39E-13    | 25.54333624 |
| MPP2         | NM_001278376 | 66.77477667 | 1.053999161 | 2.79E-07    | 63.35372852 |
| UST          | NM_005715    | 34.55083703 | 0.004542421 | 5.15E-06    | 7606.260562 |
| ANKRD49      | NM_017704    | 52.48906239 | 2.710366003 | 4.38E-05    | 19.3660422  |
| ACACA        | NM_198834    | 144.4478793 | 1.947171406 | 6.07E-14    | 74.18344317 |
| ZBTB48       | NM_005341    | 104.1827566 | 11.76593428 | 2.51E-07    | 8.854609764 |
| SEC11C       | NM_033280    | 97.67310262 | 0.934351914 | 2.81E-12    | 104.5356692 |
| LINC00441    | NR_046414    | 147.0398994 | 4.534501297 | 6.12E-15    | 32.42691749 |
| ALDH4A1      | NM_170726    | 55.87645073 | 1.562319459 | 9.01E-06    | 35.76506097 |
| STMN3        | NM_015894    | 55.08108251 | 10.82240116 | 0.002780724 | 5.089543594 |
| MYADM        | NM_001290191 | 81.06049096 | 7.48586748  | 5.58E-06    | 10.82846994 |
| THEMIS2      | NM_001105556 | 141.3256137 | 6.414934661 | 5.34E-13    | 22.03071756 |
| VDAC3        | NM_005662    | 138.9987163 | 2.332241719 | 5.46E-16    | 59.59876079 |
| TFSM         | NM_001172695 | 92.48906239 | 1.545571558 | 5.14E-11    | 59.84133306 |
| MORN1        | NM_001301060 | 35.87645073 | 1.65808595  | 0.001707128 | 21.6372684  |
| RABAC1       | NM_006423    | 120.7953682 | 19.3488712  | 9.80E-07    | 6.243018881 |
| AMBRA1       | NM_001300731 | 95.61132799 | 0.689688237 | 1.42E-10    | 138.6297791 |
| NUMB         | NM_001005744 | 90.69241049 | 0.438390512 | 1.22E-10    | 206.8758517 |
| KLK8         | NM_144505    | 77.40797988 | 14.56573555 | 0.000163277 | 5.314388665 |
| LOC100128164 | NR_024409    | 112.2239396 | 2.439969345 | 3.28E-12    | 45.99399574 |
| KCTD14       | NM_023930    | 105.773493  | 6.036000978 | 3.48E-09    | 17.52377002 |
| CSDE1        | NM_001242893 | 83.38738834 | 1.932095217 | 1.91E-08    | 43.15904704 |

|           |              |             |             |             |             |
|-----------|--------------|-------------|-------------|-------------|-------------|
| PQLC3     | NM_152391    | 146.5096539 | 4.676609533 | 2.62E-14    | 31.32817758 |
| ITFG3     | NR_104317    | 61.06049096 | 3.617132125 | 1.01E-05    | 16.88091252 |
| CTSC      | NM_001114173 | 118.4684708 | 1.147974328 | 4.92E-15    | 103.1978398 |
| PPCS      | NM_001287509 | 183.3873883 | 5.921658276 | 4.59E-18    | 30.96892455 |
| SKP2      | NM_001243120 | 132.4890624 | 0.051161828 | 7.86E-22    | 2589.607676 |
| SMPD4     | NM_017951    | 55.61132799 | 5.048283288 | 0.000237091 | 11.01588893 |
| SACM1L    | NM_014016    | 105.9794085 | 0.619804601 | 1.57E-13    | 170.9884185 |
| SPRYD4    | NM_207344    | 61.3256137  | 8.929153519 | 0.001192249 | 6.868020979 |
| APOA1BP   | NM_144772    | 193.2844306 | 26.24191798 | 3.74E-11    | 7.365484137 |
| SLC22A15  | NM_018420    | 82.85714286 | 1.081467065 | 1.88E-09    | 76.61550275 |
| ARFIP2    | NM_001242856 | 140.5302455 | 17.09867417 | 3.30E-09    | 8.218780243 |
| CERCAM    | NM_016174    | 43.91763382 | 5.972554989 | 0.002458379 | 7.353240597 |
| LRRC20    | NM_018239    | 151.9588169 | 0.196594853 | 3.23E-22    | 772.9541979 |
| ZNF3      | NM_001278290 | 87.03989941 | 3.833044627 | 2.32E-08    | 22.70777094 |
| SH2B1     | NM_001145795 | 74.81595977 | 1.388787885 | 3.45E-09    | 53.8714087  |
| CALM3     | NM_005184    | 95.34620525 | 8.387646191 | 2.56E-07    | 11.36745674 |
| GABARAPL1 | NM_031412    | 69.10167405 | 2.874451412 | 1.16E-06    | 24.03995203 |
| NPM2      | NM_001286680 | 32.22393965 | 1.610036819 | 0.003838    | 20.01441163 |
| KIAA1958  | NM_133465    | 75.34620525 | 0.358514069 | 9.52E-09    | 210.1624781 |
| ACCS      | NM_032592    | 103.6525111 | 1.384975494 | 1.74E-12    | 74.84068241 |
| UCHL3     | NM_006002    | 173.0193079 | 0.430717899 | 5.27E-23    | 401.6998322 |
| CYP2S1    | NM_030622    | 122.6512274 | 3.642777801 | 9.19E-13    | 33.66969772 |
| CACNB2    | NM_201596    | 27.03989941 | 0.167109584 | 0.004526955 | 161.8093877 |
| ELP6      | NM_001031703 | 112.2239396 | 4.672325769 | 1.03E-10    | 24.01886024 |
| RPL21     | NM_000982    | 126.2445312 | 8.74218326  | 2.76E-10    | 14.44084703 |
| BAG1      | NM_001172415 | 138.9987163 | 5.354685355 | 1.53E-13    | 25.95833501 |
| NDUFA8    | NM_014222    | 129.6319195 | 0.7823174   | 6.94E-18    | 165.7024624 |
| ORAI2     | NM_001126340 | 48.57142857 | 3.713362746 | 0.000653389 | 13.08017339 |
| COPS7B    | NM_022730    | 96.14157347 | 1.277652195 | 2.27E-11    | 75.24862701 |
| ME2       | NM_001168335 | 136.6718189 | 0.609743738 | 1.92E-17    | 224.1463263 |
| ACOT9     | NM_001037171 | 77.40797988 | 0.830465409 | 1.57E-08    | 93.21036017 |
| FBXW8     | NM_153348    | 81.06049096 | 0.861888861 | 4.14E-09    | 94.04981856 |
| MSANTD2   | NM_001301087 | 78.46847084 | 1.736149311 | 5.22E-08    | 45.19684474 |
| RCAN2     | NM_001251974 | 37.14285714 | 0.100556508 | 0.000128167 | 369.3729821 |
| RUSC2     | NM_014806    | 93.01930787 | 0.47697173  | 5.22E-12    | 195.0205894 |
| G6PC3     | NR_028581    | 115.0810825 | 13.31448315 | 1.16E-07    | 8.643300774 |
| DPYSL2    | NM_001386    | 35.87645073 | 0.376025423 | 0.000140629 | 95.40964138 |
| INPP5J    | NM_001284285 | 80.79536822 | 2.210404923 | 2.80E-08    | 36.55229291 |
| CENPA     | NM_001042426 | 81.06049096 | 4.669940182 | 5.22E-07    | 17.35792918 |
| ENOPH1    | NM_021204    | 87.57014489 | 3.026578329 | 5.49E-09    | 28.93371173 |
| SIGMAR1   | NM_001282207 | 167.5701449 | 15.4897787  | 3.70E-12    | 10.81811097 |
| SLC39A1   | NM_001271957 | 121.3256137 | 10.40292231 | 5.60E-09    | 11.66264729 |
| FAM21C    | NM_001169106 | 70.16216501 | 1.158027258 | 3.63E-07    | 60.58766279 |
| SLC25A22  | NM_001191060 | 110.162165  | 20.10319361 | 7.21E-06    | 5.479834059 |
| P4HA1     | NM_001142595 | 104.1827566 | 0.671648746 | 2.39E-12    | 155.1149425 |
| ZNF621    | NM_001287245 | 163.6525111 | 3.794128288 | 1.05E-16    | 43.13309901 |
| RPL6      | NM_001024662 | 170.162165  | 8.202348116 | 1.01E-15    | 20.74554294 |
| CD47      | NM_198793    | 163.9176338 | 1.121924728 | 6.05E-19    | 146.1039495 |
| IL20RA    | NM_001278722 | 44.4478793  | 1.209603419 | 0.000190276 | 36.74582808 |
| MRPL18    | NM_014161    | 98.2033481  | 4.179458193 | 2.45E-09    | 23.49666956 |
| ZSWIM3    | NR_037628    | 58.2033481  | 0.96365093  | 2.23E-06    | 60.39878785 |
| BTN2A1    | NM_001197234 | 77.40797988 | 3.265247983 | 4.36E-07    | 23.70661594 |
| SEC11A    | NM_001271918 | 140.7953682 | 2.263490499 | 9.18E-15    | 62.20276527 |
| CRYBB2P1  | NR_033733    | 141.060491  | 2.57452752  | 7.64E-16    | 54.79082661 |
| RIOK2     | NM_018343    | 80.05920728 | 0.032685243 | 1.51E-14    | 2449.399193 |
| ADD1      | NM_001119    | 40          | 1.231209481 | 0.000136826 | 32.48837879 |
| POLR3B    | NM_018082    | 175.3462052 | 0.744369151 | 4.01E-20    | 235.5635038 |
| KTN1      | NR_073129    | 62.85714286 | 0.129548678 | 9.13E-09    | 485.2009594 |
| YWHAG     | NM_012479    | 296.1415735 | 5.519550461 | 1.15E-29    | 53.6532052  |
| ZFAND4    | NR_104256    | 85.97940845 | 1.337800943 | 2.60E-09    | 64.26920901 |
| SMIM19    | NM_001135675 | 157.6731026 | 3.81418194  | 1.24E-16    | 41.33864224 |
| LCORL     | NM_001166139 | 83.38738834 | 0.514492249 | 1.10E-09    | 162.0770546 |
| ZSCAN26   | NM_152736    | 121.3256137 | 3.275592072 | 5.04E-13    | 37.03929275 |
| SLC39A9   | NM_018375    | 80.79536822 | 1.009697652 | 2.87E-08    | 80.01936827 |

|              |              |             |             |             |             |
|--------------|--------------|-------------|-------------|-------------|-------------|
| PTBP2        | NM_021190    | 120.7953682 | 1.259061005 | 2.40E-12    | 95.94083826 |
| LOC101929378 | NR_110249    | 63.65251108 | 0.539858402 | 4.42E-07    | 117.9059377 |
| RPP14        | NR_049758    | 155.0810825 | 3.086551312 | 2.84E-17    | 50.24412906 |
| ATXN3        | NM_001164780 | 144.1827566 | 0.950333469 | 1.01E-16    | 151.7180666 |
| ARHGFE2      | NM_001162383 | 55.87645073 | 4.341342884 | 0.000119626 | 12.87077575 |
| EMC3-AS1     | NR_103821    | 95.87645073 | 2.039603645 | 6.76E-11    | 47.0073933  |
| LINC00115    | NR_024321    | 161.3256137 | 26.41253605 | 1.78E-07    | 6.107918353 |
| COG5         | NM_006348    | 43.91763382 | 0.949833321 | 8.95E-05    | 46.23720061 |
| EIF2A        | NM_032025    | 47.03989941 | 1.799026263 | 0.00022881  | 26.14742229 |
| SEPT7P9      | NR_027269    | 75.87645073 | 1.576462138 | 1.34E-08    | 48.1308424  |
| RPL8         | NM_033301    | 163.4465956 | 33.41134936 | 3.02E-07    | 4.891948358 |
| DUS4L        | NM_001270419 | 155.0810825 | 2.456355118 | 9.53E-18    | 63.13463446 |
| KRAS         | NM_004985    | 86.24453119 | 0.389136702 | 9.07E-12    | 221.630421  |
| NAF1         | NM_138386    | 67.83526763 | 0.655296785 | 7.41E-09    | 103.5183891 |
| MAP3K13      | NM_001242317 | 124.713002  | 0.827229788 | 6.32E-14    | 150.7598056 |
| MYD88        | NM_001172568 | 94.55083703 | 7.257744179 | 1.35E-07    | 13.02757919 |
| CXCL3        | NM_002090    | 129.3667968 | 6.609487185 | 3.83E-11    | 19.57289472 |
| GBX1         | NM_001098834 | 26.77477667 | 0.551531845 | 0.001747383 | 48.54620255 |
| EIF3C        | NM_001267574 | 191.7529015 | 11.56103827 | 2.62E-15    | 16.58613153 |
| LMNB1        | NM_005573    | 135.8764507 | 2.634331553 | 5.91E-14    | 51.57910005 |
| MRPL40       | NM_003776    | 184.1827566 | 9.648485285 | 4.68E-16    | 19.08929237 |
| GRB7         | NM_005310    | 106.5096539 | 10.11856034 | 1.02E-07    | 10.5261668  |
| BSCL2        | NM_001130702 | 154.8159598 | 5.863835833 | 1.38E-14    | 26.40182368 |
| GCH1         | NM_000161    | 205.2432475 | 2.435938383 | 7.66E-22    | 84.25633791 |
| LOC729683    | NR_046273    | 49.36679679 | 1.234065677 | 3.43E-05    | 40.00337884 |
| SMPD1        | NM_001007593 | 63.1222656  | 2.141849476 | 4.27E-07    | 29.47091582 |
| EIF6         | NM_001267810 | 80.79536822 | 7.610007145 | 2.86E-06    | 10.6169898  |
| SCAMP1-AS1   | NR_105014    | 121.060491  | 24.45058599 | 2.13E-05    | 4.951230658 |
| ORC5         | NM_181747    | 198.2033481 | 0.121484481 | 7.96E-32    | 1631.511673 |
| CDK5RAP1     | NM_001278169 | 143.1222656 | 1.965507412 | 1.72E-15    | 72.81695542 |
| LINC01123    | NR_046110    | 215.3462052 | 51.65930352 | 5.80E-09    | 4.168585145 |
| CRYBG3       | NM_153605    | 206.7747767 | 0.457268542 | 3.61E-26    | 452.1954991 |
| COL13A1      | NM_080802    | 115.0810825 | 0.389944956 | 9.06E-14    | 295.1213514 |
| OIP5         | NM_007280    | 132.7541851 | 1.899815321 | 3.07E-15    | 69.8774158  |
| RLIM         | NM_183353    | 66.77477667 | 1.443999781 | 7.87E-07    | 46.24292715 |
| ASH2L        | NM_001105214 | 47.57014489 | 1.868919903 | 0.000106183 | 25.45328177 |
| SCFD1        | NM_182835    | 166.7747767 | 0.737818489 | 1.10E-19    | 226.0376762 |
| ZNF774       | NM_001004309 | 115.8764507 | 2.710667715 | 1.95E-13    | 42.74830518 |
| C14orf159    | NM_001102368 | 78.73359358 | 2.824600386 | 1.49E-07    | 27.8742416  |
| RTCA         | NM_001130841 | 87.30502215 | 2.185296688 | 2.14E-09    | 39.95110715 |
| SNX21        | NM_152897    | 124.713002  | 5.385900108 | 2.92E-12    | 23.1554614  |
| ST7L         | NM_138728    | 61.06049096 | 1.189014777 | 8.57E-07    | 51.35385374 |
| CCDC63       | NM_001286243 | 87.03989941 | 1.506266411 | 1.13E-08    | 57.78519576 |
| HIPK1-AS1    | NR_110726    | 89.89704227 | 0.442174811 | 4.24E-13    | 203.3065659 |
| ZNF341       | NM_001282933 | 26.77477667 | 0.766521234 | 0.004097075 | 34.93024783 |
| GK5          | NR_033289    | 209.6319195 | 0.556013502 | 1.95E-26    | 377.0266707 |
| MIS12        | NM_001258218 | 69.36679679 | 10.68578474 | 0.000177951 | 6.491502351 |
| RASGRP1      | NM_005739    | 32.22393965 | 0.908449059 | 0.001059661 | 35.47137766 |
| PANK2        | NM_153640    | 49.89704227 | 1.714328277 | 9.87E-05    | 29.10588535 |
| DDX52        | NM_001291476 | 120.7953682 | 3.384252796 | 2.34E-11    | 35.69336438 |
| CHCHD4       | NM_001098502 | 103.1222656 | 1.305493695 | 3.00E-13    | 78.99101004 |
| CCDC120      | NM_001163323 | 86.24453119 | 3.921480424 | 2.07E-08    | 21.99285011 |
| PTPRG        | NM_002841    | 112.4890624 | 1.017943616 | 9.50E-12    | 110.5061819 |
| MFF          | NM_001277064 | 78.2033481  | 0.95509281  | 1.34E-08    | 81.88036522 |
| VAV2         | NM_001134398 | 123.6525111 | 0.520573426 | 6.09E-14    | 237.5313546 |
| BAHCC1       | NM_001291324 | 35.08108251 | 1.360335282 | 0.003718699 | 25.78855593 |
| ARL17A       | NM_001288811 | 38.46847084 | 2.682789666 | 0.002122683 | 14.3389813  |
| ZMAT1        | NM_001011657 | 105.7142857 | 1.00639717  | 1.11E-11    | 105.0423122 |
| ESR2         | NM_001291712 | 126.2445312 | 0.727051717 | 8.93E-15    | 173.6389973 |
| GM2A         | NM_001167607 | 57.93822536 | 3.262912963 | 6.38E-05    | 17.75659542 |
| ASNSD1       | NM_019048    | 123.3873883 | 0.845656827 | 9.96E-17    | 145.9071628 |
| C14orf166    | NM_016039    | 72.22393965 | 2.650072644 | 1.22E-07    | 27.25356975 |
| SETMAR       | NR_075073    | 47.03989941 | 4.677419025 | 0.001074381 | 10.05680679 |
| SPA17        | NM_017425    | 60.79536822 | 1.521981583 | 2.13E-06    | 39.94487772 |

|           |              |             |             |             |             |
|-----------|--------------|-------------|-------------|-------------|-------------|
| SDC1      | NM_002997    | 108.8365513 | 6.288754004 | 4.91E-09    | 17.30653659 |
| RREB1     | NM_001003700 | 49.36679679 | 2.049542663 | 0.000196677 | 24.08673783 |
| TM9SF2    | NM_004800    | 67.57014489 | 0.448184681 | 9.70E-09    | 150.7640662 |
| GCDH      | NM_013976    | 61.85585918 | 1.299317979 | 8.71E-08    | 47.60640597 |
| SEC1P     | NR_004401    | 88.83655131 | 3.564907183 | 1.13E-08    | 24.91973753 |
| DEK       | NM_003472    | 123.9176338 | 1.796928002 | 2.77E-13    | 68.96082297 |
| TRPM7     | NM_001301212 | 151.6936942 | 1.036710429 | 9.36E-16    | 146.3221455 |
| NXNL2     | NM_145283    | 72.75418513 | 0.278851179 | 2.62E-10    | 260.9068583 |
| PMS2P4    | NR_046299    | 143.9176338 | 0.932246764 | 2.69E-18    | 154.3771878 |
| SMARCC2   | NM_139067    | 74.55083703 | 5.783315924 | 2.67E-06    | 12.89067345 |
| ANAPC1    | NM_022662    | 123.6525111 | 0.950765978 | 5.00E-14    | 130.055675  |
| PDIK1L    | NM_001243533 | 82.12098192 | 3.096476533 | 4.61E-08    | 26.52078291 |
| MTMR12    | NM_001294344 | 135.8764507 | 0.402017823 | 5.45E-18    | 337.9861361 |
| EXOSC5    | NM_020158    | 43.91763382 | 5.332356663 | 0.001937223 | 8.236064576 |
| ARRB2     | NM_001257331 | 69.10167405 | 2.8773985   | 1.33E-06    | 24.01532984 |
| ISCA1     | NM_030940    | 130.162165  | 5.245169035 | 5.85E-12    | 24.81562827 |
| OASL      | NM_003733    | 54.81595977 | 2.248824848 | 1.62E-05    | 24.3753798  |
| FLAD1     | NM_025207    | 63.91763382 | 9.280313228 | 0.000386813 | 6.887443586 |
| TINAGL1   | NM_022164    | 100.2651227 | 4.421367097 | 3.74E-09    | 22.67740284 |
| LOC642846 | NR_024374    | 75.34620525 | 2.489252533 | 1.69E-07    | 30.26860643 |
| ICA1      | NM_001276478 | 97.93822536 | 0.382183976 | 1.08E-11    | 256.2593712 |
| TMEM263   | NM_152261    | 117.2020644 | 5.622597771 | 2.82E-10    | 20.84482462 |
| MPP3      | NM_001932    | 120.5302455 | 1.859205612 | 3.30E-13    | 64.82889504 |
| PSD       | NM_001270965 | 51.48777871 | 9.86538948  | 0.004932914 | 5.219031526 |
| SEPT7P2   | NR_024271    | 100.5302455 | 1.630288768 | 1.61E-10    | 61.66407293 |
| TRIM23    | NM_033228    | 87.57014489 | 0.175202839 | 4.70E-14    | 499.8214945 |
| HELLS     | NM_001289074 | 106.5096539 | 2.31153444  | 1.18E-10    | 46.07746788 |
| TBC1D13   | NM_018201    | 126.5096539 | 1.648699786 | 9.11E-15    | 76.73298378 |
| DBR1      | NM_016216    | 163.3873883 | 2.248198183 | 2.79E-19    | 72.67481558 |
| NOP14     | NM_001291979 | 77.93822536 | 5.666169386 | 1.26E-06    | 13.75501155 |
| FAM160A1  | NM_001109977 | 60.79536822 | 0.063188782 | 4.14E-08    | 962.1228058 |
| CETN3     | NM_001297765 | 154.550837  | 3.29307801  | 1.05E-16    | 46.93203033 |
| SZRD1     | NR_073500    | 45.97940845 | 2.291602099 | 0.000230714 | 20.06430718 |
| NMNAT1    | NM_022787    | 142.3861047 | 2.036788497 | 1.89E-15    | 69.90716262 |
| POLL      | NM_013274    | 124.9781248 | 6.748631248 | 4.37E-11    | 18.519033   |
| STRADA    | NM_001165969 | 181.8558592 | 3.241487812 | 2.52E-18    | 56.10258922 |
| RASSF5    | NM_182663    | 67.03989941 | 0.438302862 | 4.02E-08    | 152.953369  |
| METTL2B   | NM_018396    | 90.16216501 | 2.861802039 | 1.71E-09    | 31.5053815  |
| VAMP2     | NM_014232    | 67.83526763 | 6.668404887 | 1.89E-05    | 10.1726378  |
| TRAPPC1   | NM_021210    | 115.611328  | 7.13121275  | 4.00E-09    | 16.21201499 |
| KIF1B     | NM_015074    | 54.81595977 | 0.67203508  | 3.73E-06    | 81.56711068 |
| ZNF207    | NM_003457    | 161.3256137 | 4.16946547  | 1.88E-16    | 38.69215727 |
| MAP3K4    | NM_001291958 | 109.3667968 | 0.314078665 | 9.85E-14    | 348.2146637 |
| MYZAP     | NM_152451    | 83.1222656  | 0.621697019 | 6.96E-10    | 133.7022104 |
| NDUFC1    | NM_002494    | 102.3861047 | 7.428161355 | 3.56E-08    | 13.78350574 |
| C2orf68   | NM_001013649 | 129.6319195 | 11.12265781 | 9.28E-10    | 11.65476109 |
| CTNND1    | NM_001085462 | 72.48906239 | 2.922433015 | 7.80E-07    | 24.80435378 |
| CHEK2     | NM_145862    | 109.3667968 | 1.040214056 | 7.00E-12    | 105.1387416 |
| ALKBH5    | NM_017758    | 58.46847084 | 2.891480187 | 1.39E-05    | 20.22094812 |
| GEMIN2    | NM_001009183 | 110.6924105 | 0.475299566 | 2.43E-15    | 232.889778  |
| IMMP2L    | NM_001244606 | 200.7953682 | 0.070619193 | 5.90E-25    | 2843.354047 |
| FHL2      | NM_001450    | 77.67310262 | 2.554036604 | 1.13E-07    | 30.41189876 |
| HERC6     | NM_017912    | 52.75418513 | 0.901015025 | 4.69E-06    | 58.54972854 |
| ILK       | NM_004517    | 149.6319195 | 12.0494045  | 4.45E-11    | 12.41820038 |
| AREG      | NM_001657    | 298.2033481 | 24.15721398 | 3.68E-21    | 12.3442773  |
| RCAN1     | NM_004414    | 29.10167405 | 0.412370451 | 0.001848375 | 70.57167644 |
| TECR      | NM_138501    | 184.713002  | 3.341016692 | 9.66E-19    | 55.28646488 |
| DCLRE1C   | NM_001033855 | 130.4272878 | 1.501921891 | 2.76E-14    | 86.84026017 |
| CD99L2    | NM_001242614 | 86.50965393 | 0.399537982 | 2.50E-10    | 216.5242301 |
| ZNF133    | NM_001282997 | 58.2033481  | 0.432965631 | 5.52E-08    | 134.4294879 |
| MBD4      | NM_003925    | 64.71300204 | 3.318463093 | 2.79E-06    | 19.50089551 |
| KIAA0141  | NM_001142603 | 187.5701449 | 2.295799333 | 4.85E-22    | 81.70145456 |
| MAP2K7    | NM_001297556 | 75.08108251 | 6.350387837 | 5.59E-06    | 11.82307041 |
| DCAF6     | NM_001017977 | 63.38738834 | 1.374687753 | 6.43E-06    | 46.11038992 |

|          |              |             |             |             |             |
|----------|--------------|-------------|-------------|-------------|-------------|
| DYNC1LI2 | NM_006141    | 120.2651227 | 4.000018624 | 2.79E-11    | 30.0661407  |
| TRIP6    | NM_003302    | 44.4478793  | 6.715471214 | 0.002793869 | 6.618728289 |
| ARNT     | NM_001286036 | 49.63191953 | 0.318352571 | 2.96E-06    | 155.9023675 |
| CYB5A    | NM_001190807 | 52.75418513 | 1.117851349 | 3.58E-05    | 47.1924869  |
| GDA      | NM_001242506 | 109.6319195 | 1.793442128 | 9.96E-11    | 61.12933216 |
| ATXN7L3B | NM_001136262 | 171.4285714 | 9.083619745 | 1.43E-14    | 18.87227518 |
| PAK2     | NM_002577    | 83.65251108 | 0.683601454 | 8.24E-10    | 122.3702943 |
| TMEM138  | NM_016464    | 112.2239396 | 6.461670678 | 8.84E-10    | 17.36763528 |
| NKIRAS2  | NM_001144928 | 121.060491  | 4.47680776  | 4.98E-12    | 27.04169968 |
| NRF1     | NM_005011    | 63.38738834 | 1.442043032 | 6.70E-06    | 43.9566552  |
| ZNF160   | NM_198893    | 112.2239396 | 0.12966024  | 2.60E-18    | 865.5231516 |
| DUOX1    | NM_017434    | 127.5701449 | 4.894418544 | 6.82E-12    | 26.06441271 |
| CEBPZ    | NM_005760    | 119.2638391 | 2.557509287 | 7.32E-13    | 46.63280781 |
| CAPRIN2  | NR_038177    | 61.06049096 | 0.802687396 | 2.20E-07    | 76.07007564 |
| CYTH1    | NM_017456    | 57.93822536 | 0.706967769 | 1.30E-06    | 81.95313555 |
| GTF2H3   | NM_001271868 | 109.3667968 | 3.987399102 | 4.36E-10    | 27.42810389 |
| U2AF1    | NM_006758    | 101.060491  | 3.664748037 | 6.54E-10    | 27.57638177 |
| ITPKA    | NM_002220    | 68.83655131 | 4.064166098 | 1.95E-06    | 16.93743554 |
| LEPRE1   | NM_022356    | 135.611328  | 4.031256957 | 2.15E-13    | 33.63996129 |
| RBM6     | NM_005777    | 141.3256137 | 2.052508031 | 9.04E-14    | 68.85508438 |
| THAP5    | NM_001130475 | 135.611328  | 4.122939064 | 1.74E-13    | 32.89190694 |
| TINCR    | NR_027064    | 43.65251108 | 0.313951323 | 7.62E-06    | 139.0422905 |
| ZBTB6    | NM_006626    | 89.89704227 | 2.944418332 | 2.57E-09    | 30.53134172 |
| GEN1     | NM_001130009 | 58.46847084 | 1.116089137 | 5.78E-06    | 52.38691867 |
| B4GALT5  | NM_004776    | 40.26512274 | 3.660148768 | 0.001331066 | 11.0009525  |
| PEX14    | NM_004565    | 55.08108251 | 0.493066734 | 2.80E-06    | 111.7112122 |
| HNRNPUL2 | NM_001079559 | 138.9987163 | 5.117692534 | 2.74E-13    | 27.16042736 |
| HTRA2    | NM_013247    | 131.222656  | 14.70777667 | 1.28E-08    | 8.921991334 |
| IFT43    | NR_045664    | 58.99871632 | 0.463935616 | 3.14E-07    | 127.1700519 |
| TMTC4    | NM_001079669 | 74.81595977 | 1.301592918 | 2.20E-07    | 57.48030644 |
| NF2      | NM_181831    | 104.713002  | 2.058900149 | 1.73E-10    | 50.85870826 |
| LYSMD3   | NM_001286812 | 120.7953682 | 3.819989777 | 2.26E-12    | 31.62190877 |
| DDIT3    | NM_001195055 | 181.060491  | 20.84311048 | 1.20E-11    | 8.68682681  |
| LIFR     | NM_001127671 | 137.1428571 | 0.347562944 | 1.80E-18    | 394.5842319 |
| FAM178A  | NM_018121    | 172.7541851 | 1.696295549 | 7.49E-19    | 101.8420317 |
| TIMELESS | NM_003920    | 157.2020644 | 2.404339529 | 2.42E-17    | 65.3826394  |
| POMP     | NM_015932    | 143.9176338 | 3.540571664 | 1.11E-14    | 40.64813467 |
| MAP3K6   | NM_001297609 | 118.4684708 | 13.78053428 | 7.50E-08    | 8.596798095 |
| RPL7A    | NM_000972    | 161.3256137 | 17.1409496  | 7.34E-11    | 9.411708073 |
| DRG2     | NM_001388    | 116.4066962 | 3.67220305  | 1.56E-11    | 31.69941711 |
| AKAP17A  | NM_005088    | 68.57142857 | 2.366743171 | 8.48E-07    | 28.97290648 |
| ZNF485   | NM_145312    | 41.06049096 | 0.58566355  | 8.62E-05    | 70.10935021 |
| ZNF460   | NM_006635    | 68.83655131 | 0.214324583 | 3.10E-10    | 321.1789817 |
| ARF1     | NM_001024226 | 78.99871632 | 6.821172362 | 2.70E-06    | 11.58139864 |
| FBXL18   | NM_024963    | 59.79408454 | 0.862710711 | 1.80E-07    | 69.3095423  |
| SETD1A   | NM_014712    | 60.79536822 | 3.131453281 | 7.56E-06    | 19.41442607 |
| PLGRKT   | NM_018465    | 167.0398994 | 1.20480248  | 5.37E-18    | 138.6450494 |
| TADA2A   | NM_001291918 | 60.26512274 | 2.456666768 | 1.09E-05    | 24.53125654 |
| ARL2     | NM_001667    | 83.65251108 | 9.461779751 | 3.68E-06    | 8.841096842 |
| SH3BGRL  | NM_003022    | 29.10167405 | 0.05584293  | 0.000325278 | 521.1344396 |
| MYLK     | NM_053026    | 49.10167405 | 0.523683386 | 1.76E-05    | 93.76213833 |
| KAT8     | NM_032188    | 120.7953682 | 5.663354077 | 6.35E-11    | 21.32929825 |
| PECR     | NM_018441    | 152.7541851 | 1.311705751 | 2.55E-17    | 116.4546127 |
| PPA2     | NM_176867    | 172.7541851 | 1.397876483 | 6.51E-18    | 123.5832974 |
| NT5C2    | NM_012229    | 108.8365513 | 1.601972001 | 8.73E-11    | 67.93910956 |
| ADARB1   | NR_073200    | 25.71428571 | 0.024513445 | 0.000726545 | 1048.987009 |
| SARAF    | NM_001284239 | 103.3873883 | 2.030243688 | 1.22E-11    | 50.92363489 |
| NEDD4    | NM_006154    | 78.73359358 | 0.392395222 | 1.98E-09    | 200.6487063 |
| TMEM106C | NM_001143843 | 138.7335936 | 5.918085074 | 1.96E-13    | 23.44231147 |
| DNAJB14  | NM_001278310 | 80.79536822 | 1.193601574 | 2.55E-08    | 67.6904002  |
| NFS1     | NR_037570    | 118.9987163 | 0.837021028 | 7.48E-15    | 142.169327  |
| CXorf38  | NM_144970    | 69.10167405 | 1.508498615 | 1.74E-07    | 45.80824493 |
| TSPAN4   | NM_001025239 | 48.83655131 | 8.29540987  | 0.003106083 | 5.887177617 |
| RCN2     | NM_002902    | 75.34620525 | 3.456181288 | 9.88E-07    | 21.80042045 |

|            |              |             |             |             |             |
|------------|--------------|-------------|-------------|-------------|-------------|
| AMMECR1L   | NM_001199140 | 60.79536822 | 2.712386661 | 5.85E-06    | 22.41397552 |
| RBL1       | NM_002895    | 130.162165  | 0.739145297 | 1.19E-15    | 176.0982118 |
| CDPF1      | NM_207327    | 167.3050222 | 4.462947617 | 1.35E-17    | 37.48756125 |
| MTUS1      | NM_001001925 | 51.95881691 | 1.643761263 | 0.000100086 | 31.60971004 |
| CLK2       | NM_003993    | 68.83655131 | 5.193072902 | 1.73E-05    | 13.25545638 |
| C1orf216   | NM_152374    | 103.6525111 | 14.6980038  | 1.77E-06    | 7.052148883 |
| HLCS       | NM_001242785 | 33.28443061 | 0.629999423 | 0.000626331 | 52.8324779  |
| SERGEF     | NR_104040    | 89.36679679 | 0.708374474 | 7.57E-10    | 126.1575623 |
| KDM2A      | NM_012308    | 95.08108251 | 2.147256295 | 5.08E-09    | 44.2802672  |
| ZNF592     | NM_014630    | 62.85714286 | 0.252370298 | 1.33E-08    | 249.0671179 |
| ALDH3A2    | NM_000382    | 129.8970423 | 1.182592297 | 2.14E-15    | 109.8409339 |
| AARS       | NM_001605    | 155.3462052 | 4.206987636 | 8.93E-15    | 36.9257575  |
| SAMM50     | NM_015380    | 47.03989941 | 1.164263858 | 0.000176498 | 40.40312606 |
| VDAC1      | NM_003374    | 151.9588169 | 5.503211357 | 2.74E-14    | 27.61275318 |
| GCAT       | NM_014291    | 137.9382254 | 7.219229726 | 2.26E-12    | 19.10705582 |
| FLYWCH2    | NM_001142499 | 92.48906239 | 4.254372576 | 1.29E-08    | 21.73976556 |
| GLIPR1L2   | NM_152436    | 58.99871632 | 0.288168074 | 9.48E-09    | 204.7371714 |
| STX16      | NR_037942    | 138.7335936 | 3.013686501 | 4.99E-14    | 46.03451406 |
| CKLF       | NM_001040138 | 58.2033481  | 3.89372714  | 5.92E-05    | 14.94797812 |
| EAF1       | NM_033083    | 101.8558592 | 0.123085397 | 9.71E-17    | 827.5218784 |
| ZNF397     | NM_032347    | 164.1827566 | 4.324410276 | 5.03E-16    | 37.96650782 |
| ZSCAN32    | NM_001284529 | 112.7541851 | 2.35119694  | 1.46E-11    | 47.95607854 |
| DDX21      | NM_001256910 | 50.16216501 | 2.822977364 | 6.10E-05    | 17.76924096 |
| RRBP1      | NM_001042576 | 152.2239396 | 2.206269658 | 1.35E-15    | 68.99607176 |
| ULK1       | NM_003565    | 51.42857143 | 2.275795323 | 5.18E-05    | 22.59806535 |
| CDIP1      | NM_001199056 | 45.71428571 | 0.68262754  | 6.21E-06    | 66.96812397 |
| STRAP      | NM_007178    | 90.16216501 | 2.334547097 | 6.53E-10    | 38.6208379  |
| YBX1       | NM_004559    | 46.24453119 | 3.665578464 | 0.001144113 | 12.61588905 |
| TTC9       | NM_015351    | 42.85714286 | 2.335364009 | 0.000486081 | 18.35137593 |
| B9D2       | NM_030578    | 104.713002  | 4.298907332 | 4.62E-10    | 24.35805053 |
| NUP50-AS1  | NR_038956    | 168.8365513 | 1.48703552  | 2.86E-20    | 113.5390171 |
| CCDC71L    | NM_175884    | 83.91763382 | 12.10218391 | 2.58E-05    | 6.934090113 |
| UBE2B      | NM_003337    | 83.91763382 | 5.14324106  | 2.35E-07    | 16.31609968 |
| HMGB2      | NM_002129    | 98.99871632 | 12.27217294 | 1.93E-06    | 8.066926439 |
| CXADR      | NM_001207065 | 113.0193079 | 1.687657103 | 6.67E-12    | 66.96817006 |
| LMCD1-AS1  | NR_033378    | 62.12098192 | 0.400933231 | 4.03E-07    | 154.9409657 |
| PEX5       | NM_001131024 | 80.53024548 | 2.128897068 | 1.48E-08    | 37.82721425 |
| CCPG1      | NM_001204451 | 35.61132799 | 0.930877556 | 0.000432663 | 38.25565215 |
| PGAP1      | NM_024989    | 175.0810825 | 0.058553122 | 2.17E-29    | 2990.123802 |
| GPATCH4    | NM_015590    | 86.77477667 | 12.58589872 | 3.01E-05    | 6.894603125 |
| PPP2R5C    | NM_178587    | 78.46847084 | 0.573185928 | 3.71E-09    | 136.898809  |
| EML4       | NM_001145076 | 117.4079799 | 0.420825452 | 5.96E-14    | 278.9944838 |
| NME1-NME2  | NR_037149    | 262.1209819 | 25.03310625 | 5.14E-18    | 10.47097309 |
| MCMBP      | NM_024834    | 136.1415735 | 2.175026291 | 1.33E-14    | 62.59307026 |
| PSMB6      | NM_002798    | 104.1827566 | 8.852370576 | 1.28E-07    | 11.76891045 |
| LOC652276  | NR_015441    | 198.4684708 | 1.737823616 | 4.87E-24    | 114.2051869 |
| DBF4B      | NR_036623    | 61.59073644 | 1.483835015 | 2.65E-06    | 41.50780633 |
| RBPMS      | NM_001008711 | 58.73359358 | 0.676149697 | 9.25E-07    | 86.86477839 |
| ABCB10     | NM_012089    | 95.08108251 | 0.25308075  | 5.99E-14    | 375.6946448 |
| ATP1A1-AS1 | NR_024125    | 80.79536822 | 8.023258603 | 2.65E-06    | 10.07014384 |
| INO80      | NM_017553    | 57.67310262 | 1.155257112 | 2.17E-06    | 49.92230908 |
| ITPRIPL1   | NM_001163523 | 121.060491  | 3.969328184 | 4.19E-12    | 30.49898757 |
| LEPR       | NM_001003679 | 97.93822536 | 0.524875809 | 4.99E-11    | 186.5931399 |
| ATP6V1E1   | NM_001696    | 32.48906239 | 1.053005065 | 0.000822358 | 30.85366203 |
| ZBTB21     | NM_001098403 | 117.6731026 | 4.478280525 | 4.00E-11    | 26.27640273 |
| DGCR5      | NR_110533    | 117.4079799 | 0.317353291 | 2.04E-16    | 369.9598629 |
| SUPT4H1    | NR_073470    | 105.2432475 | 2.884271316 | 3.00E-11    | 36.48867807 |
| HDAC10     | NM_001159286 | 124.4478793 | 16.49389807 | 6.19E-08    | 7.545085991 |
| NKX3-1     | NM_006167    | 172.7541851 | 5.646165343 | 5.52E-17    | 30.59672798 |
| FAM86C1    | NM_018172    | 117.6731026 | 3.145201912 | 2.28E-12    | 37.41352889 |
| PPME1      | NM_016147    | 54.81595977 | 1.387155496 | 3.82E-05    | 39.51680971 |
| MAPK14     | NM_001315    | 83.91763382 | 0.746873447 | 7.98E-10    | 112.3585718 |
| TYW3       | NM_138467    | 74.55083703 | 1.151728097 | 5.04E-08    | 64.72954616 |
| ALS2       | NM_001135745 | 53.28443061 | 0.545068988 | 1.50E-07    | 97.75722306 |

|           |              |             |             |             |             |
|-----------|--------------|-------------|-------------|-------------|-------------|
| PRCP      | NM_199418    | 127.8352676 | 0.434630987 | 7.68E-17    | 294.1236856 |
| EFCAB11   | NM_001284268 | 67.30502215 | 0.526205697 | 2.24E-09    | 127.906297  |
| EP400     | NM_015409    | 89.63191953 | 0.776045636 | 4.07E-10    | 115.4982585 |
| LRIF1     | NM_018372    | 115.3462052 | 0.976241927 | 5.59E-15    | 118.1533    |
| WDR91     | NM_014149    | 120.2651227 | 1.488659846 | 7.40E-14    | 80.78751038 |
| SRSF3     | NM_003017    | 205.9794085 | 9.120915237 | 4.56E-18    | 22.58319512 |
| SNRPD3    | NM_004175    | 139.2638391 | 3.685953731 | 2.47E-14    | 37.78230798 |
| CYB561D2  | NR_111912    | 108.6306359 | 6.490029182 | 2.97E-09    | 16.73808126 |
| ALOX5     | NM_001256154 | 51.95881691 | 0.811105508 | 4.69E-06    | 64.05925791 |
| CLINT1    | NM_014666    | 95.08108251 | 0.931182138 | 3.84E-11    | 102.1079321 |
| ARL5A     | NM_001037174 | 158.7335936 | 1.648945548 | 4.90E-19    | 96.2636964  |
| HMMR      | NM_012485    | 71.69369417 | 0.802351892 | 4.47E-08    | 89.35442775 |
| SLC9A7    | NM_001257291 | 88.83655131 | 0.697001063 | 4.71E-10    | 127.4554028 |
| KIF3B     | NM_004798    | 62.12098192 | 1.055481893 | 2.09E-07    | 58.85556382 |
| RBM14     | NM_001198836 | 187.3050222 | 6.688038011 | 7.85E-18    | 28.00597452 |
| 2-Mar     | NM_001005416 | 72.22393965 | 3.380684641 | 3.01E-06    | 21.36370212 |
| PIGP      | NM_153681    | 103.6525111 | 2.782837787 | 7.49E-11    | 37.24705462 |
| COA6      | NM_001206641 | 110.4272878 | 6.783703987 | 2.88E-09    | 16.27831756 |
| SHC1      | NM_183001    | 120.7953682 | 9.728714676 | 2.27E-09    | 12.41637485 |
| FAM91A1   | NM_144963    | 67.83526763 | 1.702760924 | 7.99E-07    | 39.83839814 |
| SMIM12    | NM_138428    | 127.0398994 | 6.556875636 | 4.13E-11    | 19.37506619 |
| EIF2AK2   | NM_002759    | 94.28571429 | 2.418709379 | 2.03E-09    | 38.98182854 |
| AFTPH     | NM_017657    | 110.162165  | 0.202364885 | 3.34E-16    | 544.3739164 |
| RMND5A    | NM_022780    | 103.6525111 | 1.002314751 | 3.96E-11    | 103.4131355 |
| ADM2      | NM_024866    | 57.67310262 | 8.794847994 | 0.00068545  | 6.557600843 |
| SNRPB2    | NM_003092    | 121.060491  | 1.052696605 | 2.27E-15    | 115.0003623 |
| DCTPP1    | NM_024096    | 61.3256137  | 8.398737432 | 0.000457394 | 7.301765794 |
| RHOC      | NM_175744    | 99.5289618  | 23.24086371 | 0.000149624 | 4.282498407 |
| KIF14     | NM_014875    | 64.18275656 | 0.361397017 | 4.56E-08    | 177.5962542 |
| RNF185    | NR_024212    | 61.3256137  | 2.277278549 | 8.98E-06    | 26.92934236 |
| CHPF2     | NM_019015    | 86.24453119 | 7.283901039 | 7.24E-07    | 11.84043149 |
| DHRS4-AS1 | NR_023923    | 153.0193079 | 3.438347281 | 9.56E-17    | 44.50373839 |
| PTAR1     | NM_001099666 | 129.3667968 | 0.352919221 | 2.68E-18    | 366.5620606 |
| RTN4      | NM_020532    | 117.9382254 | 1.900732088 | 8.22E-12    | 62.04884219 |
| ZNF251    | NM_138367    | 142.1209819 | 0.999128713 | 2.16E-17    | 142.244918  |
| KIAA0556  | NM_015202    | 93.01930787 | 0.938079383 | 2.50E-10    | 99.15931374 |
| ARHGEF1   | NM_004706    | 67.30502215 | 6.346861456 | 4.50E-05    | 10.60445743 |
| C17orf53  | NM_001171251 | 53.54955335 | 3.940232511 | 0.000169555 | 13.59045518 |
| SERINC2   | NM_178865    | 86.50965393 | 3.437525584 | 6.61E-08    | 25.16625748 |
| PIH1D2    | NM_001082619 | 130.6924105 | 4.796675636 | 4.71E-13    | 27.24645576 |
| MAPRE1    | NM_012325    | 94.55083703 | 4.134806629 | 1.78E-08    | 22.86705172 |
| NRSN2-AS1 | NR_109990    | 120.5302455 | 13.7556385  | 3.11E-08    | 8.762242876 |
| LOC202181 | NR_026921    | 69.10167405 | 0.869146917 | 2.74E-08    | 79.50517076 |
| ECD       | NM_001135753 | 118.4684708 | 1.010837643 | 7.96E-14    | 117.1983173 |
| REXO4     | NM_001279350 | 169.6319195 | 3.336115124 | 2.32E-18    | 50.84714203 |
| RAC1      | NM_006908    | 34.55083703 | 2.389433932 | 0.003555657 | 14.45984196 |
| SIAE      | NM_170601    | 92.48906239 | 2.52286766  | 2.75E-09    | 36.66029093 |
| HAUS6     | NM_001270890 | 78.99871632 | 1.352035445 | 3.11E-08    | 58.42947138 |
| ARHGEF26  | NM_001251963 | 203.6525111 | 1.362272861 | 4.64E-21    | 149.4946548 |
| KIF24     | NM_194313    | 58.46847084 | 0.565549037 | 6.71E-07    | 103.3835566 |
| MPPE1     | NR_040243    | 90.16216501 | 2.871587685 | 1.62E-09    | 31.39801911 |
| SART1     | NM_005146    | 47.30502215 | 1.774300972 | 5.57E-05    | 26.66121639 |
| PAFAH1B2  | NR_110269    | 97.93822536 | 4.652774627 | 1.19E-08    | 21.04942388 |
| ZNF789    | NM_213603    | 93.01930787 | 4.865567591 | 6.48E-09    | 19.11787394 |
| ETF1      | NM_004730    | 74.34492157 | 3.080571813 | 2.79E-07    | 24.13348108 |
| FLVCR1    | NM_014053    | 109.6319195 | 1.078817649 | 3.10E-12    | 101.6222896 |
| ODF2L     | NM_020729    | 98.73359358 | 0.735321229 | 1.65E-11    | 134.2727364 |
| HOMEZ     | NM_020834    | 110.162165  | 6.921276015 | 7.73E-10    | 15.91645309 |
| AIFM1     | NM_145812    | 43.38738834 | 1.462363933 | 0.000391331 | 29.66935068 |
| PSMG3     | NM_001134340 | 223.6525111 | 18.71417086 | 1.46E-15    | 11.95097088 |
| GPATCH8   | NM_001002909 | 127.3050222 | 0.842217153 | 5.85E-15    | 151.15463   |
| POP1      | NM_001145860 | 191.9588169 | 3.100165542 | 3.11E-19    | 61.91889249 |
| SLC11A2   | NM_001174129 | 73.54955335 | 0.544444802 | 8.16E-10    | 135.0909277 |
| CCAR1     | NR_104262    | 73.28443061 | 1.358294203 | 2.32E-07    | 53.95328233 |



|             |              |             |             |             |             |
|-------------|--------------|-------------|-------------|-------------|-------------|
| PAAF1       | NM_001267806 | 114.8159598 | 0.565788294 | 4.46E-15    | 202.9309565 |
| CHST15      | NM_001270764 | 109.1016741 | 4.614625883 | 2.02E-09    | 23.6425827  |
| STOML1      | NM_001256672 | 55.61132799 | 5.388266967 | 0.000463572 | 10.32081898 |
| MED12       | NM_005120    | 46.50965393 | 0.322482399 | 1.33E-06    | 144.2238524 |
| SLC25A3     | NM_002635    | 129.3667968 | 6.391210234 | 1.12E-11    | 20.24136151 |
| KIF18B      | NM_001264573 | 109.8970423 | 2.675082475 | 9.57E-11    | 41.08173983 |
| SDCBP2-AS1  | NR_040049    | 99.5289618  | 5.840976322 | 1.19E-08    | 17.03978176 |
| ST3GAL6     | NM_001271145 | 107.5701449 | 2.992482858 | 1.03E-10    | 35.94678733 |
| EIF4E       | NM_001130678 | 123.3873883 | 1.048720078 | 9.07E-14    | 117.6552169 |
| SLC25A17    | NR_104237    | 81.59073644 | 1.014177879 | 7.95E-09    | 80.45012432 |
| PPP1CA      | NM_001008709 | 134.550837  | 20.73308915 | 1.28E-07    | 6.489666642 |
| FAM92A1     | NM_001283034 | 135.611328  | 5.982443086 | 1.30E-11    | 22.66821866 |
| ZNF124      | NM_001297569 | 117.9382254 | 2.50467607  | 2.28E-12    | 47.0872169  |
| GJC1        | NM_005497    | 69.63191953 | 1.942413116 | 5.72E-07    | 35.84815143 |
| ZSWIM7      | NM_001042698 | 141.3256137 | 3.687891014 | 4.99E-14    | 38.32152663 |
| DNMT3B      | NM_006892    | 137.4079799 | 2.010471942 | 1.33E-14    | 68.34613159 |
| MKL2        | NM_014048    | 106.7747767 | 0.32670728  | 1.27E-12    | 326.820929  |
| FAM156A     | NM_001242492 | 57.40797988 | 0.933749649 | 7.14E-07    | 61.48112609 |
| UBE2D3      | NM_181890    | 86.30373848 | 4.104909642 | 2.98E-07    | 21.02451601 |
| ERICH5      | NM_001170806 | 123.9176338 | 2.044241507 | 1.36E-13    | 60.61790322 |
| TRPM6       | NM_001177310 | 43.65251108 | 0.2337469   | 3.50E-05    | 186.751187  |
| LOC441242   | NR_103527    | 121.060491  | 1.52873802  | 2.24E-13    | 79.1898215  |
| PANX1       | NM_015368    | 116.4066962 | 2.3319622   | 5.64E-12    | 49.91791727 |
| EMC1        | NM_001271428 | 80.79536822 | 2.533205463 | 4.93E-08    | 31.89451838 |
| RBM7        | NM_001286045 | 92.75418513 | 1.510467846 | 1.30E-10    | 61.40758663 |
| P4HA2       | NM_001017974 | 147.0398994 | 0.990292135 | 1.01E-17    | 148.4813361 |
| DNM1L       | NM_012062    | 90.42728775 | 0.774490297 | 4.23E-11    | 116.7571603 |
| CD164       | NM_001142403 | 121.3256137 | 5.428752086 | 8.76E-11    | 22.34871141 |
| LINC00959   | NR_034125    | 125.9794085 | 1.668094559 | 1.62E-13    | 75.52294188 |
| PRKRA       | NM_001139517 | 75.61132799 | 1.573301945 | 2.94E-08    | 48.05900623 |
| TRAF5       | NM_004619    | 31.95881691 | 1.038357327 | 0.000938296 | 30.77824567 |
| MESDC2      | NM_015154    | 149.6319195 | 3.365365793 | 2.75E-16    | 44.46230477 |
| HNRNPH1     | NM_001257293 | 224.713002  | 11.96543347 | 4.69E-19    | 18.78018064 |
| IMP4        | NM_033416    | 77.20206442 | 5.088188534 | 7.47E-07    | 15.1727995  |
| C12orf45    | NM_152318    | 129.3667968 | 3.474254396 | 9.83E-14    | 37.2358446  |
| INTS1       | NM_001080453 | 75.34620525 | 1.906431307 | 1.34E-07    | 39.52211914 |
| MIER1       | NM_001146110 | 78.2033481  | 3.303977045 | 2.31E-07    | 23.66945867 |
| MCFD2       | NM_001171507 | 96.14157347 | 6.382234363 | 3.25E-08    | 15.06393655 |
| UBR4        | NM_020765    | 158.2033481 | 1.351972019 | 5.36E-16    | 117.0167325 |
| G2E3        | NM_017769    | 93.01930787 | 1.292296134 | 8.77E-10    | 71.97987012 |
| ZNF596      | NM_001287256 | 97.93822536 | 4.237131776 | 2.38E-09    | 23.11427412 |
| SLC44A3     | NM_001301079 | 61.59073644 | 1.795846388 | 5.28E-06    | 34.29621646 |
| RAD51       | NM_002875    | 86.50965393 | 1.59608466  | 5.12E-09    | 54.20116871 |
| ZNF227      | NM_001289167 | 67.03989941 | 0.162488082 | 1.14E-10    | 412.5834863 |
| POLR3E      | NM_001258035 | 100.7953682 | 2.38793836  | 2.52E-10    | 42.21020522 |
| OSGEPL1-AS1 | NR_102429    | 124.1827566 | 16.53822784 | 1.18E-07    | 7.508830918 |
| EPAS1       | NM_001430    | 115.0810825 | 1.763106159 | 1.88E-11    | 65.27178293 |
| TYW1        | NM_018264    | 140         | 0.718173021 | 1.69E-15    | 194.9390967 |
| MFSD5       | NM_032889    | 137.9382254 | 18.25375681 | 6.74E-08    | 7.556703356 |
| ANAPC16     | NM_001242547 | 244.713002  | 3.360694886 | 6.10E-27    | 72.8161914  |
| PLEKHB2     | NR_049789    | 78.46847084 | 3.946715682 | 1.49E-06    | 19.88196697 |
| INPP5K      | NM_130766    | 69.89704227 | 2.510581409 | 4.92E-07    | 27.8409782  |
| TECPR2      | NM_014844    | 109.3667968 | 0.776022583 | 2.19E-12    | 140.9324925 |
| TATDN3      | NM_001146171 | 172.2239396 | 2.449983558 | 1.42E-18    | 70.29595733 |
| FAM185A     | NR_026879    | 55.34620525 | 0.109585357 | 4.19E-08    | 505.0510995 |
| MSH6        | NM_000179    | 91.69369417 | 4.738149722 | 3.08E-08    | 19.35221543 |
| S100PBP     | NM_001256121 | 35.61132799 | 3.233955087 | 0.004177181 | 11.01169529 |
| UNC119      | NM_005148    | 115.0810825 | 7.800383636 | 1.71E-09    | 14.75325931 |
| SNHG4       | NR_036536    | 118.2033481 | 24.19282157 | 1.01E-05    | 4.885885168 |
| CCM2        | NM_031443    | 37.14285714 | 0.992899762 | 0.000248575 | 37.40846617 |
| VAT1        | NM_006373    | 57.7323099  | 8.978531283 | 0.001080058 | 6.4300394   |
| TMBIM4      | NM_001282606 | 153.8146761 | 4.666244254 | 8.60E-15    | 32.96327147 |
| CREM        | NM_181571    | 44.4478793  | 0.722585544 | 2.33E-05    | 61.51227307 |
| DERA        | NM_001300779 | 149.6319195 | 0.097855796 | 1.41E-22    | 1529.106351 |

|          |              |             |             |             |             |
|----------|--------------|-------------|-------------|-------------|-------------|
| BTBD8    | NM_183242    | 135.611328  | 0.436752052 | 5.72E-18    | 310.4995787 |
| ZNF77    | NM_021217    | 104.713002  | 1.552842556 | 2.28E-12    | 67.43310947 |
| CSNK1G3  | NM_001270574 | 66.77477667 | 0.599445337 | 1.01E-07    | 111.3942716 |
| LIFR-AS1 | NR_103553    | 93.01930787 | 1.12002433  | 4.48E-10    | 83.05114934 |
| GRAMD2   | NM_001012642 | 94.81595977 | 1.363149909 | 3.21E-10    | 69.55651694 |
| RAD52    | NM_001297422 | 159.2638391 | 2.204057579 | 7.28E-18    | 72.25938223 |
| CD44     | NM_001001391 | 63.91763382 | 5.708854664 | 5.23E-05    | 11.19622719 |
| VPS11    | NM_021729    | 80.26512274 | 1.934625953 | 3.87E-09    | 41.4887036  |
| CBLL1    | NM_024814    | 63.91763382 | 4.741635868 | 2.33E-05    | 13.48008063 |
| TBCA     | NM_001297738 | 111.6936942 | 1.629701213 | 3.06E-11    | 68.5363018  |
| GLMN     | NM_053274    | 235.611328  | 1.075533663 | 1.55E-28    | 219.064578  |
| TAB1     | NM_153497    | 95.87645073 | 0.075772029 | 1.32E-16    | 1265.327752 |
| IQUB     | NM_001282855 | 89.63191953 | 0.180459011 | 1.69E-12    | 496.6885225 |
| POLD1    | NR_046402    | 75.08108251 | 1.130289317 | 5.04E-08    | 66.42642848 |
| BTD      | NM_001281723 | 47.83526763 | 1.665451852 | 0.000117106 | 28.72209579 |
| UBAP1    | NM_001171202 | 103.1222656 | 0.144430518 | 2.49E-15    | 713.9922137 |
| NCOA4    | NM_001145261 | 62.85714286 | 4.811992143 | 3.09E-05    | 13.06260297 |
| TRIAP1   | NM_016399    | 76.14157347 | 6.494362941 | 7.22E-06    | 11.72425597 |
| ABCB9    | NM_001243013 | 84.71300204 | 2.268243062 | 9.94E-09    | 37.34740931 |
| BMS1P5   | NR_003611    | 121.060491  | 2.787325667 | 6.30E-12    | 43.43248885 |
| AIG1     | NM_001286589 | 51.42857143 | 0.359631232 | 3.78E-06    | 143.0036296 |
| FAN1     | NM_001146095 | 120.5302455 | 2.11976204  | 9.55E-14    | 56.86027167 |
| RNF207   | NM_207396    | 97.93822536 | 6.59057391  | 3.85E-08    | 14.86034854 |
| EPOR     | NR_033663    | 111.9588169 | 24.20138684 | 2.19E-05    | 4.626132281 |
| TIGD6    | NM_030953    | 78.2033481  | 13.84390825 | 0.000214807 | 5.648935741 |
| GTF3C6   | NM_138408    | 70.42728775 | 2.609401282 | 3.31E-07    | 26.98982645 |
| BTG2     | NM_006763    | 221.5907364 | 15.67352451 | 4.50E-17    | 14.13790091 |
| DES12    | NR_123735    | 184.4478793 | 0.484960351 | 2.39E-24    | 380.3359982 |
| RAD1     | NR_026591    | 75.61132799 | 1.175961615 | 2.12E-09    | 64.29744564 |
| MBOAT1   | NM_001080480 | 58.46847084 | 0.836546328 | 1.56E-06    | 69.89268721 |
| MEF2A    | NM_005587    | 103.3873883 | 1.2874662   | 4.31E-10    | 80.30299232 |
| AGTPBP1  | NM_001286717 | 100.5302455 | 0.208068421 | 1.68E-12    | 483.159553  |
| PSMB5    | NM_001144932 | 42.91635014 | 5.240733275 | 0.001730153 | 8.188997204 |
| PSMC4    | NM_153001    | 64.4478793  | 5.360271983 | 3.63E-05    | 12.02324798 |
| PEA15    | NM_001297577 | 146.7747767 | 7.712275349 | 4.38E-13    | 19.03131956 |
| RPL5     | NM_000969    | 161.5907364 | 8.414643818 | 4.01E-14    | 19.20351472 |
| PPP6R2   | NM_014678    | 126.7747767 | 2.070461747 | 1.81E-12    | 61.23019507 |
| ALDH5A1  | NM_170740    | 87.03989941 | 1.107041461 | 2.90E-09    | 78.62388399 |
| ZNF211   | NM_001265599 | 58.73359358 | 0.75955621  | 7.40E-08    | 77.32619757 |
| PPA1     | NM_021129    | 155.8764507 | 2.322948965 | 1.36E-17    | 67.10283052 |
| TTC4     | NM_001291333 | 171.6936942 | 0.849089191 | 1.03E-22    | 202.2092567 |
| IL6R     | NM_001206866 | 33.28443061 | 1.45896303  | 0.003075973 | 22.81375876 |
| ARAP3    | NM_022481    | 41.3256137  | 2.367503366 | 0.000908741 | 17.45535583 |
| YTHDC1   | NM_133370    | 123.3873883 | 3.770391878 | 2.08E-11    | 32.72534854 |
| UCK1     | NM_001261450 | 50.42728775 | 5.853411279 | 0.000802118 | 8.615025555 |
| EZH2     | NM_152998    | 46.24453119 | 0.369035497 | 1.06E-05    | 125.311878  |
| ANXA7    | NM_004034    | 141.3256137 | 1.582028091 | 1.07E-15    | 89.33192433 |
| FAM49B   | NM_001256763 | 144.713002  | 1.021279951 | 1.70E-15    | 141.6976822 |
| APLP1    | NM_001024807 | 72.22393965 | 5.106008149 | 1.73E-06    | 14.14489314 |
| AMD1     | NM_001287216 | 90.42728775 | 5.19572994  | 2.89E-08    | 17.40415472 |
| GNAS     | NM_001077489 | 68.83655131 | 4.467776329 | 6.09E-06    | 15.40734053 |
| LBX2     | NM_001009812 | 135.0810825 | 12.95469191 | 9.11E-10    | 10.42719375 |
| C17orf80 | NR_110105    | 54.07979883 | 1.876982913 | 1.03E-05    | 28.81208905 |
| KIF9     | NM_182902    | 56.14157347 | 0.847233269 | 7.35E-07    | 66.26459975 |
| TCP1     | NM_030752    | 129.3667968 | 6.587441875 | 3.59E-11    | 19.6383967  |
| MAPKAP1  | NM_001006620 | 138.4684708 | 0.739891017 | 4.74E-15    | 187.1471171 |
| CTNS     | NM_004937    | 76.40669621 | 7.82160731  | 8.33E-06    | 9.768669428 |
| HBEGF    | NM_001945    | 200.7953682 | 4.482285348 | 3.15E-21    | 44.79754247 |
| SCNM1    | NM_024041    | 66.77477667 | 6.216784493 | 4.36E-05    | 10.74104736 |
| WDR31    | NM_001012361 | 138.7335936 | 1.518039838 | 8.75E-17    | 91.38995572 |
| NMRK1    | NM_017881    | 149.3667968 | 0.520640719 | 1.19E-20    | 286.8903472 |
| PRKG2    | NM_001282480 | 49.36679679 | 0.185054018 | 1.08E-06    | 266.7696557 |
| PA2G4    | NM_006191    | 83.1222656  | 8.136811955 | 3.82E-06    | 10.21558149 |
| TMEM14B  | NM_030969    | 183.3873883 | 3.122256915 | 2.18E-21    | 58.73552155 |

|           |              |             |             |             |             |
|-----------|--------------|-------------|-------------|-------------|-------------|
| STAG3L4   | NR_040586    | 160.7953682 | 2.235775328 | 4.84E-18    | 71.91928733 |
| PIK3R1    | NM_181523    | 184.1827566 | 1.910848457 | 5.06E-19    | 96.38794532 |
| ELMOD1    | NM_001130037 | 32.48906239 | 0.204529051 | 0.000412909 | 158.8481552 |
| APOBEC3F  | NM_145298    | 61.3256137  | 4.709464388 | 3.98E-05    | 13.02178096 |
| FOXJ3     | NM_001198851 | 50.16216501 | 0.899871313 | 8.59E-06    | 55.74370946 |
| AGPAT5    | NM_018361    | 41.85585918 | 3.189851879 | 0.000637752 | 13.12156826 |
| EXOSC1    | NM_016046    | 58.99871632 | 1.20962826  | 2.87E-07    | 48.77425429 |
| LHX2      | NM_004789    | 57.93822536 | 0.592393268 | 9.01E-07    | 97.80365254 |
| H3F3AP4   | NR_002315    | 142.8571429 | 4.964643429 | 1.03E-13    | 28.77490497 |
| ADIPOR2   | NM_024551    | 65.97940845 | 1.023522071 | 1.73E-07    | 64.46310275 |
| MON1A     | NM_001142501 | 108.8365513 | 4.326513323 | 2.65E-10    | 25.15571852 |
| SPECC1L   | NM_001254732 | 194.550837  | 1.384468104 | 5.99E-20    | 140.5238853 |
| FNTA      | NR_033698    | 138.2033481 | 2.26821033  | 3.44E-15    | 60.93056992 |
| CSNK1A1   | NM_001892    | 103.3873883 | 2.418477616 | 2.57E-10    | 42.748954   |
| MAOA      | NM_001270458 | 27.03989941 | 0.517220351 | 0.004124413 | 52.27926424 |
| TEX2      | NM_018469    | 89.63191953 | 3.210683192 | 2.21E-08    | 27.91677477 |
| AFG3L1P   | NR_003227    | 175.611328  | 1.656006289 | 2.09E-21    | 106.0450852 |
| ATG4D     | NM_032885    | 135.0810825 | 8.279719791 | 9.58E-12    | 16.31469252 |
| EHHADH    | NM_001166415 | 164.4478793 | 0.194445199 | 1.94E-25    | 845.728669  |
| TMEM184B  | NM_012264    | 121.060491  | 3.125390923 | 5.01E-12    | 38.57345116 |
| SMAD6     | NR_027654    | 112.2239396 | 1.532951601 | 2.41E-11    | 73.20775134 |
| DTL       | NM_016448    | 67.30502215 | 0.26292572  | 3.13E-09    | 255.9849308 |
| POLR3F    | NM_001282526 | 58.99871632 | 1.643233444 | 1.78E-06    | 35.90403818 |
| GMNN      | NM_001251990 | 92.48906239 | 3.587354544 | 3.35E-09    | 25.78196865 |
| SURF4     | NM_033161    | 107.0398994 | 7.046807646 | 5.02E-09    | 15.18984266 |
| MGST3     | NM_004528    | 64.18275656 | 3.485407862 | 2.40E-05    | 18.4147047  |
| ATP5J     | NM_001003697 | 61.06049096 | 7.929735887 | 0.00020276  | 7.700192267 |
| NOP2      | NM_001258309 | 169.8970423 | 4.463908877 | 1.11E-17    | 38.06015018 |
| NDRG1     | NM_001135242 | 214.875167  | 0.409581859 | 5.14E-29    | 524.620811  |
| CCDC93    | NM_019044    | 190.162165  | 0.937411348 | 3.19E-21    | 202.8588254 |
| TTC14     | NM_133462    | 109.1016741 | 2.225433227 | 1.11E-12    | 49.02491468 |
| UBE2H     | NM_003344    | 102.1209819 | 2.391434349 | 6.57E-10    | 42.7028164  |
| TMEM120B  | NM_001080825 | 120.7953682 | 5.792731032 | 1.53E-10    | 20.85292197 |
| TMEM150A  | NM_001031738 | 107.0398994 | 16.91995928 | 2.29E-06    | 6.326250414 |
| TMED3     | NM_007364    | 133.0193079 | 5.249465884 | 5.81E-13    | 25.33958898 |
| MARVELD3  | NM_052858    | 134.8159598 | 4.721325074 | 1.86E-13    | 28.55468701 |
| MMP28     | NM_001032278 | 76.14157347 | 2.176406509 | 2.07E-08    | 34.98499621 |
| LAMB1     | NM_002291    | 63.65251108 | 2.532090505 | 6.58E-06    | 25.13832383 |
| FKBP7     | NM_181342    | 109.3667968 | 1.661360208 | 2.66E-13    | 65.82967153 |
| MBIP      | NM_016586    | 71.69369417 | 0.602528869 | 7.31E-09    | 118.9879819 |
| CASP8     | NM_001080125 | 41.59073644 | 0.564337351 | 1.30E-05    | 73.69835859 |
| DCAF5     | NM_001284206 | 72.22393965 | 1.519245654 | 7.40E-07    | 47.53934261 |
| CHORDC1   | NM_012124    | 95.87645073 | 2.782465716 | 2.48E-10    | 34.45737001 |
| ADAM22    | NM_021722    | 218.2033481 | 0.363211385 | 7.40E-26    | 600.7613114 |
| PPP1R3B   | NM_001201329 | 49.10167405 | 5.510735343 | 0.000645787 | 8.910185482 |
| CAPZA2    | NM_006136    | 109.3667968 | 1.202500741 | 1.26E-11    | 90.94946312 |
| ASB13     | NM_024701    | 123.6525111 | 1.720966518 | 5.54E-14    | 71.85061987 |
| ASAP1     | NM_018482    | 52.22393965 | 1.015084751 | 1.16E-05    | 51.44786145 |
| EWSR1     | NM_001163287 | 63.65251108 | 2.652775559 | 2.49E-06    | 23.99468393 |
| FBXL13    | NM_001111038 | 78.99871632 | 0.526826262 | 5.87E-09    | 149.9521228 |
| MTL5      | NM_001039656 | 66.24453119 | 3.306489829 | 6.41E-06    | 20.03469983 |
| CDK5RAP2  | NR_073556    | 71.95881691 | 0.735029378 | 5.36E-08    | 97.89923918 |
| PPHLN1    | NM_201438    | 72.48906239 | 0.855844946 | 2.01E-08    | 84.69882627 |
| SERPINB8  | NM_001276490 | 89.89704227 | 4.376596657 | 3.95E-08    | 20.54039916 |
| HNRNPDL   | NM_001207000 | 107.0398994 | 21.21247899 | 2.35E-05    | 5.046081576 |
| TXNDC5    | NM_030810    | 37.14285714 | 3.285532015 | 0.002029003 | 11.30497495 |
| POT1      | NR_003102    | 27.30502215 | 0.660624257 | 0.002224703 | 41.33215194 |
| THOC5     | NM_003678    | 118.4684708 | 1.510543209 | 1.14E-12    | 78.42772728 |
| DSTN      | NM_006870    | 93.01930787 | 2.414057324 | 1.19E-09    | 38.53235255 |
| CCNT2-AS1 | NR_036549    | 68.83655131 | 0.854596128 | 2.53E-08    | 80.54863471 |
| ANKS3     | NR_040252    | 81.59073644 | 2.527834003 | 2.55E-08    | 32.27693604 |
| BRF2      | NM_018310    | 122.6512274 | 7.745109745 | 1.62E-10    | 15.83595732 |
| SEPW1     | NM_003009    | 130.6924105 | 12.92539122 | 2.20E-09    | 10.11129244 |
| MROH8     | NM_152503    | 91.69369417 | 0.52440602  | 2.29E-11    | 174.8524818 |

|              |              |             |             |             |             |
|--------------|--------------|-------------|-------------|-------------|-------------|
| TAZ          | NM_000116    | 55.61132799 | 2.856347441 | 5.83E-05    | 19.46938499 |
| SYPL1        | NM_182715    | 67.03989941 | 0.418139119 | 1.85E-08    | 160.3291736 |
| WSB1         | NM_134265    | 240.7953682 | 4.71452428  | 5.32E-25    | 51.07522073 |
| ILDRI        | NM_175924    | 145.7142857 | 1.447572827 | 7.35E-17    | 100.6611087 |
| ARHGFE16     | NM_014448    | 43.1222656  | 0.228473057 | 2.20E-06    | 188.7411412 |
| YTHDF3       | NM_001277817 | 47.57014489 | 1.763413078 | 0.000119954 | 26.9761779  |
| TRIM52-AS1   | NR_102762    | 92.48906239 | 7.940031068 | 6.12E-07    | 11.64845094 |
| RAB3IP       | NM_175624    | 92.22393965 | 0.713122694 | 6.42E-11    | 129.3240847 |
| BICD2        | NM_015250    | 53.54955335 | 1.03826419  | 2.03E-06    | 51.57603805 |
| ABLIM3       | NM_001301027 | 32.75418513 | 0.970269022 | 0.001212451 | 33.75783869 |
| TNFRSF10B    | NR_027140    | 124.713002  | 2.96250455  | 8.81E-13    | 42.09715122 |
| SEC61A2      | NM_001142627 | 69.89704227 | 1.714070724 | 6.77E-07    | 40.77838871 |
| RGL3         | NM_001161616 | 86.24453119 | 6.686737432 | 1.09E-06    | 12.89784922 |
| KAT7         | NM_001199157 | 119.5289618 | 3.132425481 | 2.85E-12    | 38.15859708 |
| DCP2         | NM_001242377 | 157.9382254 | 1.622739671 | 1.67E-17    | 97.32813472 |
| ARMC7        | NM_024585    | 118.2033481 | 13.57128273 | 3.61E-08    | 8.709813985 |
| SLC39A6      | NM_001099406 | 129.8970423 | 2.072312598 | 4.16E-14    | 62.682166   |
| GATC         | NM_176818    | 113.0193079 | 6.835200439 | 7.71E-10    | 16.534893   |
| ASAH1        | NM_004315    | 83.91763382 | 7.249256545 | 2.40E-06    | 11.57603311 |
| MYO19        | NM_001163735 | 121.5907364 | 6.327067174 | 3.51E-10    | 19.21755105 |
| TMBIM6       | NM_001098576 | 64.18275656 | 0.056128365 | 2.31E-11    | 1143.499481 |
| FOXRED1      | NR_037647    | 52.75418513 | 3.033574873 | 0.000119534 | 17.39010486 |
| USP15        | NM_001252079 | 92.75418513 | 0.623215343 | 3.40E-11    | 148.8316777 |
| PTPRF        | NM_130440    | 71.69369417 | 2.24541707  | 8.94E-07    | 31.9288987  |
| VPS72        | NM_001271087 | 106.7747767 | 4.664396103 | 1.67E-09    | 22.89144711 |
| ZNF271       | NR_024566    | 104.1827566 | 1.350906849 | 2.82E-12    | 77.12060724 |
| NFIL3        | NM_001290000 | 63.91763382 | 4.730718911 | 2.02E-05    | 13.51118826 |
| GFOD2        | NM_030819    | 95.34620525 | 0.524639158 | 1.26E-12    | 181.7367305 |
| ZNF526       | NM_133444    | 121.060491  | 9.245883357 | 1.62E-09    | 13.09344779 |
| CST3         | NM_000099    | 168.8365513 | 10.20103664 | 4.31E-14    | 16.55092097 |
| SPATA24      | NM_194296    | 38.2033481  | 4.041608099 | 0.004760195 | 9.452511764 |
| NXPE3        | NM_001134456 | 61.59073644 | 1.61890687  | 3.39E-06    | 38.04464456 |
| PRMT5        | NM_001039619 | 80.26512274 | 10.99440185 | 3.55E-05    | 7.300544754 |
| YEATS4       | NM_006530    | 133.2844306 | 0.442394743 | 2.11E-18    | 301.2794177 |
| UBE2J1       | NM_016021    | 132.2239396 | 0.647436579 | 1.80E-17    | 204.2268601 |
| YKT6         | NM_006555    | 158.9987163 | 0.657594452 | 1.55E-22    | 241.788409  |
| FABP5        | NM_001444    | 198.9987163 | 19.76433384 | 1.08E-13    | 10.06857696 |
| ZNF143       | NM_001282656 | 137.9382254 | 1.61764266  | 2.15E-14    | 85.27113481 |
| TUG1         | NR_002323    | 70.16216501 | 5.34825217  | 8.30E-06    | 13.11870921 |
| FAM210A      | NM_152352    | 84.4478793  | 0.624270407 | 1.13E-10    | 135.2745194 |
| ADAM10       | NM_001110    | 56.14157347 | 0.424143644 | 1.13E-06    | 132.3645287 |
| TRAPPC12     | NM_016030    | 207.3050222 | 0.284665557 | 2.95E-29    | 728.2406228 |
| GATAD2A      | NM_017660    | 46.50965393 | 1.635436799 | 0.000346008 | 28.43867398 |
| RNF128       | NM_194463    | 88.83655131 | 0.893185228 | 1.63E-10    | 99.46039024 |
| GBF1         | NM_001199378 | 197.9382254 | 1.931392875 | 7.14E-20    | 102.4847031 |
| MLF2         | NM_005439    | 75.08108251 | 4.180502543 | 4.71E-07    | 17.95982223 |
| RPA1         | NM_002945    | 108.8365513 | 1.112229495 | 1.77E-11    | 97.85440126 |
| EIF3L        | NM_001242923 | 116.9369417 | 3.025425954 | 5.14E-12    | 38.65139767 |
| SGCE         | NM_003919    | 37.40797988 | 0.719396499 | 0.000205022 | 51.99911307 |
| KIAA0040     | NM_001162893 | 72.48906239 | 3.80267633  | 4.59E-06    | 19.06264328 |
| TMCO6        | NM_018502    | 107.3050222 | 7.67629337  | 8.01E-09    | 13.97875472 |
| TRIM3        | NM_001248006 | 69.63191953 | 3.443675164 | 6.16E-06    | 20.22023455 |
| DHFRL1       | NM_176815    | 70.16216501 | 7.689328006 | 1.99E-05    | 9.124615956 |
| GAR1         | NM_032993    | 36.14157347 | 0.32576723  | 6.63E-05    | 110.9429376 |
| C3orf18      | NM_001171740 | 75.34620525 | 3.99339055  | 4.04E-07    | 18.86772764 |
| LAS1L        | NM_031206    | 54.81595977 | 1.253224849 | 8.79E-06    | 43.73992408 |
| ULK2         | NM_001142610 | 124.4478793 | 0.530708286 | 1.51E-15    | 234.4939443 |
| SDHC         | NM_001035513 | 73.54955335 | 1.487120716 | 1.66E-07    | 49.45768864 |
| LOC100507634 | NR_038320    | 147.3050222 | 11.52503609 | 6.20E-11    | 12.7813068  |
| BTF3         | NM_001207    | 113.0193079 | 1.524533151 | 1.15E-14    | 74.13371614 |
| FAM174A      | NM_198507    | 55.61132799 | 0.965799498 | 1.78E-06    | 57.58061391 |
| HPS1         | NM_182639    | 184.713002  | 3.706560368 | 3.56E-19    | 49.83407356 |
| MOB4         | NM_001204094 | 55.08108251 | 0.873997676 | 1.00E-06    | 63.02200111 |
| CCDC90B      | NM_001286120 | 112.7541851 | 1.519277407 | 1.01E-12    | 74.21566637 |

|              |              |             |             |             |             |
|--------------|--------------|-------------|-------------|-------------|-------------|
| NDUFB3       | NM_001257102 | 172.4890624 | 2.010684455 | 8.06E-21    | 85.78624159 |
| SNX7         | NM_152238    | 118.4684708 | 0.447937012 | 1.12E-14    | 264.4757357 |
| NUDT3        | NM_006703    | 114.8159598 | 1.570060487 | 2.04E-11    | 73.12836715 |
| TMEM44       | NM_138399    | 51.69369417 | 2.332218851 | 7.22E-05    | 22.16502716 |
| DYNC1H1      | NM_001376    | 178.2033481 | 1.248101499 | 3.79E-19    | 142.7795321 |
| SMN1         | NM_022874    | 129.9562496 | 14.81026837 | 1.96E-08    | 8.77473968  |
| SCAMP1       | NM_001290229 | 111.9588169 | 0.913889799 | 1.05E-12    | 122.5080059 |
| AGO3         | NM_177422    | 215.8764507 | 0.424313814 | 5.96E-28    | 508.7660205 |
| RRAGC        | NM_001271851 | 64.18275656 | 0.136915543 | 1.77E-10    | 468.7762634 |
| ARHGAP8      | NM_181335    | 54.81595977 | 1.633361293 | 4.66E-05    | 33.56021721 |
| IQCE         | NM_152558    | 60.53024548 | 1.48679242  | 7.33E-06    | 40.71196805 |
| LOC100505666 | NR_040772    | 131.9588169 | 6.117013149 | 5.44E-12    | 21.57242656 |
| CEP162       | NM_001286206 | 21.59073644 | 0.038775023 | 0.002065881 | 556.8207323 |
| DHRS7        | NM_016029    | 180.5302455 | 3.709933622 | 4.26E-19    | 48.66131415 |
| NUPL1        | NM_014089    | 109.6319195 | 2.515488769 | 3.49E-11    | 43.58275055 |
| RPN2         | NM_002951    | 72.48906239 | 1.504893843 | 4.68E-07    | 48.1688876  |
| PALD1        | NM_014431    | 114.8159598 | 2.845097349 | 3.74E-11    | 40.35572273 |
| PTPMT1       | NM_001143984 | 120.7953682 | 4.527346659 | 3.86E-12    | 26.68127213 |
| RRM2B        | NM_015713    | 92.48906239 | 0.540275091 | 2.99E-11    | 171.188833  |
| UTP18        | NM_016001    | 145.5083703 | 2.729833089 | 1.64E-15    | 53.30302824 |
| MCPH1        | NM_001172574 | 89.63191953 | 0.546006449 | 7.15E-12    | 164.1590857 |
| RAD54L       | NM_003579    | 71.69369417 | 4.664627976 | 4.74E-06    | 15.36964888 |
| SLC25A5      | NM_001152    | 124.1827566 | 10.23672213 | 2.39E-09    | 12.13110555 |
| ECI2         | NR_028588    | 100.7953682 | 0.698471223 | 4.50E-13    | 144.3085484 |
| GPR107       | NM_001136557 | 96.14157347 | 1.870341423 | 1.40E-09    | 51.40322097 |
| ARF5         | NM_001662    | 121.5907364 | 10.7214022  | 4.58E-09    | 11.34093603 |
| TIPRL        | NM_001031800 | 49.63191953 | 4.380555632 | 0.000519271 | 11.33005119 |
| CCDC134      | NM_024821    | 169.8970423 | 3.801821518 | 3.46E-17    | 44.68832676 |
| FBXL20       | NM_032875    | 91.95881691 | 0.426928943 | 7.22E-11    | 215.3960712 |
| CUL3         | NM_001257197 | 63.1222656  | 0.669601139 | 2.82E-07    | 94.26845613 |
| MLKL         | NM_152649    | 98.73359358 | 1.315331278 | 2.42E-11    | 75.06367043 |
| FPGS         | NR_110170    | 155.0810825 | 5.611106443 | 1.72E-14    | 27.63823571 |
| ZDHHC20      | NM_153251    | 126.7747767 | 0.023217337 | 2.73E-22    | 5460.349686 |
| CHD2         | NM_001042572 | 152.7541851 | 4.39848184  | 4.05E-14    | 34.72884297 |
| PPL          | NM_002705    | 71.95881691 | 2.761705961 | 7.22E-07    | 26.05592989 |
| LYSMD4       | NM_001284417 | 89.63191953 | 2.653291102 | 2.57E-09    | 33.78141187 |
| GIGYF2       | NM_001103148 | 177.6731026 | 1.056495943 | 2.66E-18    | 168.1720634 |
| POLR2K       | NM_005034    | 108.1003904 | 3.818994279 | 5.17E-11    | 28.30598384 |
| SNX15        | NM_013306    | 92.75418513 | 2.302537502 | 1.51E-09    | 40.28346338 |
| ISL2         | NM_145805    | 114.8159598 | 4.541253794 | 2.94E-11    | 25.28287671 |
| SZT2         | NM_015284    | 135.3462052 | 3.400339827 | 2.35E-13    | 39.80372907 |
| RPS17        | NR_111943    | 139.2638391 | 30.98798151 | 1.92E-06    | 4.494124246 |
| ARSA         | NM_001085428 | 66.24453119 | 6.239255592 | 6.59E-05    | 10.61737738 |
| LOC100288798 | NR_125379    | 121.8558592 | 0.679171393 | 1.49E-13    | 179.4184213 |
| C16orf46     | NM_152337    | 149.8970423 | 1.397591642 | 3.38E-18    | 107.2538199 |
| NCOA6        | NM_014071    | 37.14285714 | 0.68978947  | 0.000249985 | 53.84665724 |
| CNOT8        | NM_001301083 | 129.8970423 | 3.445578755 | 4.01E-13    | 37.69962944 |
| LINC01431    | NR_109884    | 98.99871632 | 23.10193621 | 0.000359496 | 4.285299528 |
| TSPYL1       | NM_003309    | 61.06049096 | 11.73369971 | 0.001518136 | 5.203856625 |
| FAM195B      | NM_207368    | 49.63191953 | 7.300918104 | 0.002281641 | 6.798038113 |
| N4BP3        | NM_015111    | 111.9588169 | 4.940580317 | 3.30E-10    | 22.66106605 |
| ST6GALNAC2   | NM_006456    | 124.713002  | 13.99234102 | 2.54E-08    | 8.912947582 |
| SF3A2        | NM_007165    | 95.87645073 | 5.805678283 | 1.84E-08    | 16.51425485 |
| GGCT         | NM_001199816 | 110.4272878 | 3.635682898 | 2.35E-11    | 30.37319008 |
| IDUA         | NM_000203    | 138.4684708 | 3.70392605  | 3.83E-14    | 37.38424282 |
| GPR155       | NM_001033045 | 64.18275656 | 0.422421202 | 3.79E-08    | 151.9401874 |
| MAPK4        | NM_002747    | 32.22393965 | 0.705651237 | 0.001225315 | 45.66553274 |
| ING2         | NM_001564    | 40.79536822 | 3.671954964 | 0.00224436  | 11.10998599 |
| ARHGAP5      | NM_001173    | 40.26512274 | 0.905256558 | 0.000117335 | 44.47923893 |
| TUT1         | NM_022830    | 117.9382254 | 5.902694415 | 2.50E-10    | 19.98040506 |
| RPL22L1      | NM_001099645 | 164.4478793 | 27.0802318  | 7.45E-09    | 6.072617122 |
| UNK          | NM_001080419 | 117.9382254 | 2.533518387 | 3.73E-12    | 46.5511622  |
| RRM2         | NM_001165931 | 115.611328  | 9.899481667 | 1.11E-08    | 11.67852337 |
| NELFCD       | NM_198976    | 63.1222656  | 4.872934196 | 1.85E-05    | 12.95364621 |

|                |              |             |             |             |             |
|----------------|--------------|-------------|-------------|-------------|-------------|
| TMEM135        | NM_001168724 | 127.5701449 | 0.230663995 | 1.96E-15    | 553.0561662 |
| COMMD8         | NM_017845    | 141.3256137 | 1.521244133 | 2.55E-17    | 92.90133691 |
| PTPRS          | NM_130855    | 37.14285714 | 2.438310531 | 0.002522323 | 15.23302987 |
| TWF2           | NM_007284    | 151.9588169 | 6.34030022  | 5.10E-14    | 23.96713273 |
| DCAF10         | NM_001286810 | 184.4478793 | 0.712953083 | 2.25E-22    | 258.7097014 |
| EPHA2          | NM_004431    | 155.8764507 | 7.727984521 | 1.18E-13    | 20.17038858 |
| TNS4           | NM_032865    | 86.50965393 | 10.71571507 | 6.58E-06    | 8.073157354 |
| ERCC6L         | NM_017669    | 62.85714286 | 0.201394767 | 1.63E-09    | 312.1091164 |
| LINC01420      | NR_015367    | 74.81595977 | 0.318161586 | 1.60E-09    | 235.150826  |
| EDC3           | NM_001142444 | 47.57014489 | 1.539218907 | 0.000138835 | 30.90537978 |
| PRKCI          | NM_002740    | 149.6319195 | 0.963408311 | 2.94E-16    | 155.3151637 |
| ARRDC1         | NM_152285    | 160.7953682 | 17.35707907 | 9.52E-11    | 9.263964725 |
| BSG            | NM_198589    | 98.99871632 | 6.047086916 | 8.16E-09    | 16.37130699 |
| ATF7           | NR_073163    | 102.3861047 | 1.196154885 | 2.79E-10    | 85.59602603 |
| PRCC           | NM_005973    | 49.89704227 | 2.306019411 | 0.000119038 | 21.63773732 |
| CDC25A         | NM_201567    | 58.46847084 | 2.867586191 | 1.59E-05    | 20.389438   |
| TMEM237        | NM_001044385 | 49.89704227 | 3.103838858 | 0.000115037 | 16.07591262 |
| KIAA1841       | NM_001129993 | 90.69241049 | 0.066623024 | 3.54E-15    | 1361.277301 |
| C18orf25       | NM_001008239 | 92.22393965 | 0.876976988 | 1.25E-10    | 105.1611854 |
| ALDH1L2        | NR_027752    | 40.79536822 | 1.047510885 | 0.000112436 | 38.94505423 |
| ADAM17         | NM_003183    | 89.89704227 | 1.958684899 | 9.09E-09    | 45.89663316 |
| IKZF5          | NR_073479    | 121.060491  | 0.75833499  | 2.46E-16    | 159.639859  |
| HYAL3          | NM_001200031 | 129.3667968 | 17.30639403 | 4.20E-08    | 7.475086756 |
| ZNF664-FAM101A | NM_001204299 | 60.53024548 | 0.302221552 | 7.99E-07    | 200.2843445 |
| SORL1          | NM_003105    | 46.50965393 | 0.911718084 | 3.80E-05    | 51.01319667 |
| FUT4           | NM_002033    | 150.4272878 | 13.10060878 | 1.51E-11    | 11.48246545 |
| CNPY3          | NM_006586    | 72.22393965 | 7.41176018  | 1.26E-05    | 9.744505744 |
| TTC31          | NM_022492    | 61.06049096 | 2.056271719 | 1.23E-06    | 29.69475795 |
| C19orf48       | NM_001290152 | 90.69241049 | 19.61180062 | 0.000117594 | 4.62437959  |
| GTF2H2C        | NM_001098728 | 170.4272878 | 2.307874859 | 3.11E-19    | 73.84598306 |
| SP110          | NM_004510    | 38.73359358 | 0.880488917 | 7.62E-05    | 43.9910064  |
| PYGL           | NM_002863    | 232.2239396 | 4.090738169 | 2.07E-23    | 56.76822375 |
| OXA1L          | NM_005015    | 77.93822536 | 7.694207419 | 4.88E-06    | 10.12946768 |
| DCTN6          | NM_006571    | 34.55083703 | 1.522358347 | 0.002851844 | 22.6956006  |
| LOC100289230   | NR_036530    | 154.550837  | 25.88131189 | 9.31E-08    | 5.97152253  |
| LINC01135      | NR_034014    | 41.06049096 | 2.316564832 | 0.001313114 | 17.72473206 |
| XPC            | NM_001145769 | 129.8970423 | 1.951565275 | 3.82E-14    | 66.56043941 |
| TSNAX-DISC1    | NR_028396    | 99.26383906 | 0.423280033 | 2.73E-11    | 234.511036  |
| DISP2          | NM_033510    | 49.63191953 | 2.589390971 | 5.57E-05    | 19.16741044 |
| ELP2           | NM_001242878 | 115.0810825 | 1.333224383 | 1.62E-12    | 86.31786515 |
| KCTD17         | NM_001282686 | 50.16216501 | 2.889327844 | 0.000153047 | 17.36118839 |
| HOXB13         | NM_006361    | 95.61132799 | 4.779864993 | 4.76E-09    | 20.00293484 |
| LOC100507557   | NR_038244    | 78.2033481  | 0.231216121 | 1.41E-10    | 338.2261913 |
| PCBP2          | NM_001128911 | 48.83655131 | 7.757523081 | 0.003177866 | 6.29537944  |
| ZNF12          | NM_016265    | 74.07979883 | 3.182604309 | 8.70E-07    | 23.27647161 |
| ULK3           | NM_001284365 | 172.2239396 | 4.442458122 | 1.42E-18    | 38.76771259 |
| AAMDC          | NM_024684    | 134.8159598 | 0.662940185 | 3.40E-16    | 203.3606694 |
| DOLK           | NM_014908    | 161.060491  | 10.87283017 | 2.87E-12    | 14.81311567 |
| CD46           | NM_172353    | 107.0398994 | 3.125008052 | 1.26E-10    | 34.25267956 |
| COL6A4P1       | NR_027927    | 64.18275656 | 0.028752232 | 2.31E-11    | 2232.270418 |
| BBS12          | NM_001178007 | 38.46847084 | 2.383793804 | 0.00107983  | 16.1374993  |
| CDKN3          | NM_001130851 | 175.3462052 | 1.753856982 | 3.93E-20    | 99.97748225 |
| ELK1           | NM_001257168 | 89.10167405 | 0.778965752 | 1.38E-11    | 114.3845847 |
| TMEM67         | NR_024522    | 65.50837026 | 0.816334686 | 7.65E-08    | 80.24695185 |
| BABAM1         | NM_014173    | 32.48906239 | 1.938902541 | 0.004212891 | 16.75641849 |
| PSMD10         | NM_170750    | 35.34620525 | 1.930773045 | 0.001280391 | 18.30676336 |
| TRMU           | NR_104241    | 128.8365513 | 6.970649646 | 4.02E-11    | 18.48271795 |
| TMEM127        | NM_001193304 | 129.3667968 | 5.306688998 | 8.38E-12    | 24.37806264 |
| COMMD6         | NM_001287393 | 158.7335936 | 2.667333373 | 1.04E-18    | 59.51021915 |
| TBC1D24        | NM_001199107 | 34.28571429 | 1.402173635 | 0.002886788 | 24.4518321  |
| TRAF3IP2-AS1   | NR_034108    | 98.73359358 | 1.046327587 | 2.77E-11    | 94.36202848 |
| ZDHHC13        | NM_019028    | 149.6319195 | 1.233521471 | 1.95E-16    | 121.3046737 |
| AZI2           | NM_022461    | 107.8352676 | 3.209983814 | 2.32E-10    | 33.59371071 |
| FAM86B3P       | NR_024363    | 121.3256137 | 6.084070009 | 4.53E-11    | 19.94152163 |

|              |              |             |             |             |             |
|--------------|--------------|-------------|-------------|-------------|-------------|
| CHMP5        | NM_001195536 | 38.2033481  | 2.19075394  | 0.00131376  | 17.43844775 |
| CTNNB1       | NM_001098209 | 192.7541851 | 3.045226864 | 2.43E-19    | 63.29715117 |
| LETM1        | NM_012318    | 104.713002  | 3.070779889 | 1.29E-10    | 34.09980716 |
| TRIM11       | NM_145214    | 120         | 4.925137681 | 3.57E-11    | 24.3648011  |
| STAG3L5P     | NR_103720    | 200.5302455 | 4.664152393 | 1.02E-21    | 42.99393085 |
| AP2A1        | NM_014203    | 60.26512274 | 1.909286914 | 6.84E-06    | 31.56420457 |
| DUSP2        | NM_004418    | 157.6731026 | 18.2387885  | 1.19E-09    | 8.644932891 |
| ABCC5        | NM_001023587 | 66.24453119 | 1.152541343 | 6.19E-07    | 57.47692402 |
| GOLGA2P10    | NR_103496    | 54.28571429 | 3.233036449 | 3.84E-05    | 16.79093791 |
| SERINC5      | NM_178276    | 186.7747767 | 1.467820724 | 6.03E-19    | 127.246314  |
| UNC5B        | NM_170744    | 178.2033481 | 1.597417213 | 1.36E-18    | 111.5571728 |
| CA11         | NM_001217    | 61.59073644 | 11.26063436 | 0.001157609 | 5.469561879 |
| NFU1         | NR_045631    | 117.6731026 | 2.58597958  | 4.10E-12    | 45.50426598 |
| LOC101928600 | NR_109904    | 23.91763382 | 0.748569452 | 0.004865016 | 31.9511219  |
| SENP6        | NM_015571    | 161.060491  | 0.062971161 | 5.00E-26    | 2557.686524 |
| ZNF784       | NM_203374    | 60.26512274 | 1.490796863 | 2.71E-07    | 40.42477164 |
| KXD1         | NM_001171948 | 69.89704227 | 4.847525059 | 3.51E-06    | 14.41911933 |
| CACNB1       | NM_000723    | 128.5714286 | 4.168253441 | 1.87E-12    | 30.84539614 |
| WLS          | NM_001193334 | 101.8558592 | 1.300141823 | 2.73E-10    | 78.34211422 |
| TSPAN17      | NM_001006616 | 135.0810825 | 3.950307259 | 1.68E-13    | 34.19508247 |
| TFAP2A       | NM_003220    | 75.87645073 | 15.31887051 | 0.000363093 | 4.953136114 |
| NUBP2        | NM_012225    | 92.75418513 | 3.660515485 | 3.93E-09    | 25.3391047  |
| CTSB         | NM_147780    | 149.1016741 | 6.626706383 | 3.96E-13    | 22.50011777 |
| ZNF786       | NM_152411    | 190.4272878 | 5.2532106   | 1.37E-18    | 36.24969609 |
| FDX1L        | NM_001031734 | 106.2445312 | 7.17723356  | 1.19E-08    | 14.80299203 |
| AP1G2        | NM_001282475 | 92.75418513 | 14.93854056 | 1.22E-05    | 6.209052667 |
| ECE2         | NM_032331    | 109.3667968 | 7.022873336 | 4.37E-09    | 15.57294167 |
| RMND1        | NM_001271937 | 115.8764507 | 1.659858944 | 1.75E-12    | 69.8110229  |
| GLG1         | NR_027265    | 133.0193079 | 2.369189916 | 5.16E-13    | 56.1454812  |
| SENP5        | NM_152699    | 152.4890624 | 1.222702721 | 1.38E-16    | 124.7147485 |
| BBX          | NM_001276286 | 75.61132799 | 1.058878157 | 4.35E-08    | 71.40701458 |
| MTHFS        | NM_022764    | 123.6525111 | 3.15887417  | 4.07E-12    | 39.14432353 |
| ARHGAP22     | NR_045675    | 55.34620525 | 1.543044927 | 5.53E-05    | 35.86817485 |
| TRIM44       | NM_017583    | 67.57014489 | 0.769213534 | 9.24E-08    | 87.84315651 |
| RHOBTB3      | NM_014899    | 75.87645073 | 1.782917127 | 1.40E-07    | 42.55747481 |
| TAMM41       | NM_001284401 | 101.5907364 | 0.962644669 | 3.22E-11    | 105.5329549 |
| OSTF1        | NM_012383    | 218.2033481 | 1.025266821 | 5.98E-26    | 212.8259138 |
| HMGXB3       | NM_014983    | 101.060491  | 2.368193382 | 4.67E-10    | 42.67408722 |
| AJUBA        | NM_001289097 | 78.73359358 | 19.38048221 | 0.001344881 | 4.062519844 |
| CREB3L2      | NM_001253775 | 87.30502215 | 1.79585082  | 1.16E-08    | 48.61485217 |
| ETNK2        | NM_001297761 | 43.38738834 | 3.991424369 | 0.002306852 | 10.87015169 |
| LOC101927027 | NR_110205    | 101.060491  | 3.67430999  | 1.61E-09    | 27.50461753 |
| ALG8         | NM_001007027 | 79.5289618  | 1.704398034 | 2.95E-08    | 46.66102649 |
| PLA2G4C      | NM_001159323 | 92.22393965 | 0.07260958  | 7.82E-15    | 1270.134603 |
| E2F2         | NM_004091    | 98.73359358 | 5.367741134 | 4.71E-09    | 18.39388136 |
| APIB1        | NM_001166019 | 98.73359358 | 1.086976142 | 1.26E-10    | 90.83326651 |
| SFR1         | NM_001002759 | 186.7747767 | 7.64384947  | 2.99E-17    | 24.43464872 |
| MEGF11       | NM_032445    | 32.22393965 | 0.951456927 | 0.001398799 | 33.86799626 |
| ZSCAN31      | NM_001243242 | 84.4478793  | 5.018807559 | 2.51E-07    | 16.82628359 |
| ZNF302       | NM_018675    | 115.611328  | 1.801590305 | 5.22E-14    | 64.17181957 |
| CDK10        | NR_027702    | 174.6100443 | 22.07034971 | 1.04E-10    | 7.911521412 |
| ACBD7        | NM_001039844 | 33.54955335 | 0.342664337 | 2.87E-05    | 97.90792237 |
| ZFAND2B      | NM_001270999 | 114.550837  | 14.01222232 | 2.05E-07    | 8.175065627 |
| SFI1         | NM_014775    | 109.8970423 | 1.94019394  | 1.37E-10    | 56.64229747 |
| PTPN23       | NM_015466    | 149.1016741 | 2.224279883 | 1.74E-16    | 67.03368368 |
| PYCR2        | NM_001271681 | 135.611328  | 14.81152306 | 2.32E-09    | 9.155798998 |
| TCEANC2      | NM_153035    | 71.69369417 | 0.826341932 | 8.07E-09    | 86.76032454 |
| REPIN1       | NM_001099695 | 92.48906239 | 8.151391122 | 5.66E-07    | 11.3464145  |
| MROH1        | NM_001099280 | 113.2844306 | 1.120981286 | 3.17E-12    | 101.0582711 |
| MGST2        | NM_002413    | 60.79536822 | 0.479071515 | 5.47E-08    | 126.9024901 |
| VEGFA        | NM_001171627 | 197.6731026 | 8.638828102 | 8.23E-18    | 22.88193494 |
| CYFIP1       | NM_014608    | 41.06049096 | 1.610036502 | 0.001229847 | 25.50283233 |
| BTN2A2       | NM_001197238 | 33.28443061 | 0.556196291 | 0.000476506 | 59.84295674 |
| YME1L1       | NM_014263    | 76.93694168 | 1.33228422  | 5.38E-08    | 57.74814452 |

|              |              |             |             |             |             |
|--------------|--------------|-------------|-------------|-------------|-------------|
| STK25        | NM_001282308 | 46.24453119 | 8.95069745  | 0.004828982 | 5.166584107 |
| USP9X        | NM_001039591 | 27.30502215 | 1.276287091 | 0.002646389 | 21.39410667 |
| DDX54        | NM_024072    | 129.1016741 | 3.235441466 | 1.42E-12    | 39.90233648 |
| WDHD1        | NM_001008396 | 103.1222656 | 0.508266323 | 9.61E-13    | 202.8902192 |
| ORC3         | NM_012381    | 50.69241049 | 0.056928026 | 3.50E-08    | 890.4649221 |
| RELA         | NM_001243985 | 121.060491  | 5.37741608  | 1.48E-11    | 22.51276248 |
| SLC9A8       | NM_001260491 | 112.7541851 | 1.971695701 | 3.79E-11    | 57.1864031  |
| RALGPS2      | NM_152663    | 72.22393965 | 0.288053907 | 1.75E-08    | 250.7306371 |
| JMJD1C       | NM_001282948 | 78.2033481  | 1.220543071 | 1.50E-07    | 64.0725837  |
| ZFP64        | NM_018197    | 115.611328  | 3.023717456 | 1.15E-11    | 38.23483169 |
| SH3GLB1      | NM_001206653 | 121.3256137 | 1.280593639 | 2.40E-13    | 94.74169636 |
| CSTF3        | NM_001033506 | 112.4890624 | 1.391018289 | 1.75E-13    | 80.86814049 |
| DENND4C      | NM_017925    | 135.611328  | 1.145839571 | 1.33E-13    | 118.3510601 |
| TMEM123      | NM_052932    | 134.8159598 | 2.225531468 | 6.93E-14    | 60.57697306 |
| TIMM8A       | NM_001145951 | 117.6731026 | 16.19263329 | 9.20E-05    | 7.267076361 |
| AREL1        | NM_001039479 | 81.59073644 | 0.198699428 | 2.84E-12    | 410.6239117 |
| FBXO21       | NM_015002    | 167.3050222 | 2.327165892 | 4.14E-18    | 71.89217697 |
| SCAP         | NM_012235    | 113.5495533 | 1.250817874 | 3.84E-12    | 90.78024526 |
| SUCLG2       | NM_001177599 | 106.7747767 | 0.514226962 | 8.72E-12    | 207.6413423 |
| NME6         | NM_005793    | 72.75418513 | 4.635518515 | 3.51E-06    | 15.69494003 |
| KDM1B        | NM_153042    | 112.4890624 | 1.577533215 | 1.87E-11    | 71.30693753 |
| SF3B5        | NM_031287    | 137.6731026 | 27.14480879 | 0.000221626 | 5.071802263 |
| SPRY4        | NM_030964    | 172.4890624 | 9.060318825 | 2.99E-14    | 19.03785791 |
| HPS5         | NM_007216    | 138.9987163 | 1.525115026 | 1.51E-15    | 91.13982482 |
| ZKSCAN1      | NM_001287054 | 60.79536822 | 3.228233241 | 7.40E-06    | 18.83239645 |
| LOC100630923 | NR_038967    | 150.4272878 | 4.775406294 | 7.69E-14    | 31.50041661 |
| ZNF180       | NM_001288759 | 124.4478793 | 2.297668184 | 5.97E-14    | 54.16268553 |
| MARS         | NM_004990    | 44.18275656 | 3.957279257 | 0.002557727 | 11.1649327  |
| ZER1         | NM_006336    | 109.1016741 | 3.877109374 | 7.92E-10    | 28.13995261 |
| AP3S2        | NR_037582    | 140.7953682 | 2.141326458 | 1.94E-14    | 65.75147274 |
| CD99P1       | NR_033381    | 46.24453119 | 1.606773186 | 0.000170484 | 28.7809951  |
| RPARP-AS1    | NR_038937    | 130.162165  | 31.95631251 | 1.01E-05    | 4.07312843  |
| TARS2        | NR_073514    | 118.7335936 | 1.165685014 | 4.91E-15    | 101.8573561 |
| PPM1J        | NM_005167    | 143.3873883 | 11.56478511 | 4.96E-11    | 12.39862107 |
| SSBP1        | NR_046269    | 136.4066962 | 2.582832033 | 1.15E-15    | 52.81284051 |
| BRI3BP       | NM_080626    | 49.36679679 | 1.637376509 | 9.04E-05    | 30.14993591 |
| FRS2         | NM_001278355 | 135.3462052 | 0.840480368 | 1.23E-15    | 161.0343446 |
| UBE2F-SCLY   | NR_037904    | 38.2033481  | 1.707655961 | 0.002417337 | 22.37180614 |
| PREPL        | NM_001171606 | 117.4079799 | 1.523620406 | 1.09E-12    | 77.05855041 |
| EXOSC2       | NM_001282708 | 132.4890624 | 5.728547597 | 1.47E-12    | 23.12786272 |
| KLC2         | NM_022822    | 123.3873883 | 15.99585982 | 8.11E-08    | 7.713707778 |
| GGA3         | NM_001291641 | 122.6512274 | 6.367303312 | 1.75E-10    | 19.26266449 |
| MKS1         | NM_017777    | 161.060491  | 0.519868739 | 3.32E-23    | 309.809917  |
| FH           | NM_000143    | 141.5907364 | 0.64276847  | 9.32E-20    | 220.2826417 |
| WDR44        | NM_001184966 | 68.57142857 | 0.529903073 | 3.72E-08    | 129.4037195 |
| AMPD2        | NM_004037    | 60.26512274 | 3.000451894 | 1.65E-05    | 20.08534877 |
| SERPINB9     | NM_004155    | 209.8970423 | 1.771136703 | 2.39E-26    | 118.509792  |
| ATRAID       | NM_016085    | 104.4478793 | 4.399829208 | 1.98E-10    | 23.73907585 |
| CDS2         | NM_003818    | 58.2033481  | 1.345947493 | 1.68E-05    | 43.24340169 |
| PAPL         | NM_001004318 | 34.55083703 | 1.594264414 | 0.002920652 | 21.67196152 |
| TKT          | NR_047580    | 54.34492157 | 10.00944481 | 0.003292278 | 5.429364227 |
| STARD7-AS1   | NR_046322    | 224.4478793 | 2.679297644 | 2.39E-24    | 83.77116288 |
| RNH1         | NM_203384    | 93.01930787 | 6.078026002 | 4.57E-08    | 15.30419709 |
| SAE1         | NR_027280    | 133.0193079 | 4.006414192 | 4.58E-12    | 33.20158663 |
| PFKFB3       | NM_001145443 | 183.9176338 | 4.790477059 | 9.53E-17    | 38.39234205 |
| SEC31A       | NM_001077206 | 135.3462052 | 0.571896396 | 3.73E-17    | 236.6621054 |
| LOC100506368 | NR_038905    | 91.95881691 | 0.566101196 | 4.42E-12    | 162.4423647 |
| GPI          | NM_001289789 | 67.03989941 | 5.929488881 | 2.22E-05    | 11.3061852  |
| ACBD4        | NM_001135705 | 41.06049096 | 4.208256797 | 0.002797105 | 9.757125798 |
| EZH1         | NM_001991    | 97.67310262 | 0.689906879 | 2.87E-11    | 141.5743279 |
| GDI2         | NM_001494    | 98.46847084 | 3.581714173 | 1.52E-09    | 27.49199575 |
| PMF1-BGLAP   | NM_001199663 | 81.59073644 | 2.428872413 | 1.67E-08    | 33.59202238 |
| ARL15        | NM_019087    | 84.71300204 | 0.195738161 | 6.30E-10    | 432.7873605 |
| MOSPD3       | NM_023948    | 87.83526763 | 2.559522583 | 5.76E-09    | 34.31705124 |



|              |              |             |             |             |             |
|--------------|--------------|-------------|-------------|-------------|-------------|
| DCBLD2       | NM_080927    | 173.0193079 | 9.511006075 | 1.12E-13    | 18.19148327 |
| E2F6         | NM_001278277 | 50.16216501 | 4.699250262 | 0.000373475 | 10.67450385 |
| ORC1         | NM_004153    | 89.63191953 | 3.264395133 | 6.48E-09    | 27.45743572 |
| GOLGA4       | NM_001172713 | 144.4478793 | 0.563477136 | 1.55E-17    | 256.3509147 |
| SATB2        | NM_001172509 | 54.81595977 | 0.153550227 | 8.58E-07    | 356.9904173 |
| ILIR1        | NM_000877    | 68.57142857 | 0.865231934 | 1.86E-07    | 79.25207782 |
| MTMR10       | NM_017762    | 117.6731026 | 0.938237312 | 3.58E-13    | 125.419338  |
| ALDOC        | NM_005165    | 61.85585918 | 5.83460274  | 6.79E-05    | 10.60155454 |
| TSPO         | NR_046308    | 112.2239396 | 9.344128963 | 7.55E-09    | 12.01010175 |
| ABHD15       | NM_198147    | 95.61132799 | 9.875084422 | 6.79E-07    | 9.682077024 |
| BSPRY        | NM_017688    | 157.1428571 | 2.600916057 | 6.10E-17    | 60.41827329 |
| TAF15        | NM_139215    | 232.7541851 | 2.670717411 | 9.56E-25    | 87.15043537 |
| STXBP1       | NM_003165    | 171.4285714 | 1.283877681 | 1.52E-18    | 133.5240685 |
| LOC101929295 | NR_110303    | 69.89704227 | 10.05628533 | 0.000109149 | 6.950582646 |
| MBTD1        | NM_017643    | 45.50837026 | 1.143128621 | 3.02E-05    | 39.81036728 |
| PAPD4        | NM_173797    | 46.77477667 | 1.225006221 | 0.000263363 | 38.18329727 |
| PEX10        | NM_153818    | 64.4478793  | 7.830446427 | 0.000143597 | 8.230422096 |
| LRP6         | NM_002336    | 58.73359358 | 0.434169409 | 5.08E-07    | 135.2780558 |
| PNP          | NM_000270    | 226.5096539 | 4.121621352 | 7.43E-25    | 54.95644423 |
| MRPL43       | NM_176794    | 165.2432475 | 12.10537689 | 3.00E-13    | 13.65040089 |
| NT5C3B       | NR_033465    | 152.2239396 | 1.78856659  | 4.90E-19    | 85.10946167 |
| FARP1        | NM_005766    | 48.57142857 | 1.212018324 | 2.30E-05    | 40.07483022 |
| B4GALT3      | NM_001199874 | 89.89704227 | 14.52848205 | 1.75E-05    | 6.187641763 |
| AKIP1        | NR_045418    | 94.55083703 | 5.221387405 | 1.50E-08    | 18.10837421 |
| CFAP97       | NM_020827    | 157.1428571 | 2.703624249 | 1.34E-16    | 58.12303882 |
| NAA16        | NM_024561    | 124.1827566 | 0.927410429 | 1.54E-13    | 133.9026958 |
| ACP2         | NM_001131064 | 159.2638391 | 12.10277586 | 1.08E-12    | 13.15928188 |
| ARMC5        | NM_001105247 | 95.34620525 | 13.74495019 | 6.28E-06    | 6.936817081 |
| NDUFAF5      | NM_001039375 | 95.34620525 | 0.821850937 | 4.30E-11    | 116.0139886 |
| CCDC50       | NM_178335    | 61.06049096 | 1.408727791 | 8.48E-06    | 43.34442138 |
| TAF1A        | NM_001201536 | 83.38738834 | 0.494899298 | 1.59E-11    | 168.4936483 |
| POLD4        | NM_001256870 | 135.3462052 | 13.16468747 | 2.82E-09    | 10.28100406 |
| PPIE         | NR_036543    | 109.8970423 | 3.942721368 | 1.35E-10    | 27.8733981  |
| METTTL21B    | NM_206914    | 61.06049096 | 1.289726844 | 2.87E-07    | 47.34373891 |
| RABL6        | NM_001173989 | 65.71428571 | 3.06102004  | 1.69E-06    | 21.46810045 |
| URGCP        | NM_001290076 | 143.9176338 | 1.666696496 | 1.80E-15    | 86.34903486 |
| CAP1         | NM_001105530 | 93.01930787 | 4.271354407 | 2.00E-08    | 21.77747361 |
| MAU2         | NM_015329    | 83.91763382 | 2.064559852 | 1.87E-08    | 40.64674305 |
| EGLN2        | NM_080732    | 77.40797988 | 4.209546427 | 1.82E-07    | 18.3886747  |
| KIF9-AS1     | NR_033373    | 89.63191953 | 0.380451897 | 2.09E-11    | 235.5933041 |
| CLIC5        | NM_001256023 | 48.83655131 | 0.64603779  | 1.14E-05    | 75.59395454 |
| PLCB3        | NM_000932    | 168.8365513 | 8.290702515 | 1.42E-14    | 20.36456513 |
| EFHC1        | NM_018100    | 24.71300204 | 0.697194895 | 0.004244027 | 35.44633243 |
| DPH5         | NM_015958    | 90.42728775 | 1.412790448 | 7.24E-10    | 64.00615735 |
| INTS12       | NM_001142471 | 172.2239396 | 1.710965735 | 1.20E-20    | 100.6589063 |
| FKBP5        | NM_001145777 | 163.6525111 | 1.525811114 | 9.21E-17    | 107.2560749 |
| AADAT        | NM_001286682 | 100.5302455 | 0.988356522 | 9.20E-12    | 101.7145567 |
| LOC100507437 | NR_125384    | 64.18275656 | 3.551239425 | 2.68E-05    | 18.07333972 |
| SEC23B       | NM_032985    | 83.38738834 | 2.397173304 | 3.73E-08    | 34.78571541 |
| PDHB         | NR_033384    | 125.7142857 | 3.531338461 | 4.23E-13    | 35.59961389 |
| CCDC167      | NM_138493    | 75.87645073 | 4.321230749 | 5.79E-07    | 17.55899075 |
| POC1A        | NM_001161581 | 50.16216501 | 0.602488476 | 3.86E-06    | 83.25829794 |
| E2F8         | NM_001256372 | 40.79536822 | 2.123725142 | 0.000632218 | 19.20934466 |
| E2F3         | NM_001949    | 202.6512274 | 4.619664876 | 8.76E-19    | 43.86708405 |
| FAM98C       | NM_174905    | 84.4478793  | 2.564214953 | 5.14E-09    | 32.93322941 |
| GMPR2        | NM_001002002 | 67.03989941 | 3.954674085 | 9.55E-06    | 16.95206684 |
| WDR73        | NM_032856    | 106.2445312 | 4.884831874 | 1.15E-09    | 21.74988494 |
| LPAR3        | NM_012152    | 155.3462052 | 2.476227329 | 1.34E-15    | 62.73503383 |
| RAB3GAP1     | NM_012233    | 80.53024548 | 0.741446627 | 3.30E-09    | 108.6123297 |
| STX12        | NM_177424    | 124.1827566 | 0.683352998 | 1.51E-14    | 181.7256336 |
| TTK          | NM_003318    | 24.4478793  | 0.074880792 | 0.000538626 | 326.4906629 |
| FIZ1         | NM_032836    | 63.65251108 | 3.342486424 | 4.77E-06    | 19.04346136 |
| IDH3G        | NM_004135    | 46.24453119 | 1.648190774 | 4.07E-05    | 28.05775395 |
| SOGA1        | NM_080627    | 37.14285714 | 3.112885246 | 0.002446438 | 11.93197121 |

|          |              |             |             |             |             |
|----------|--------------|-------------|-------------|-------------|-------------|
| RNF24    | NM_001134337 | 106.7747767 | 0.340185884 | 7.34E-14    | 313.8718613 |
| STAM     | NM_003473    | 61.85585918 | 0.723191133 | 1.72E-07    | 85.53182746 |
| DNAJC10  | NM_001271581 | 198.2033481 | 0.702506611 | 3.40E-24    | 282.1373422 |
| RABGAP1L | NM_014857    | 115.8764507 | 0.031904536 | 8.39E-16    | 3631.974183 |
| BBS4     | NM_001252678 | 126.7747767 | 0.689074734 | 7.03E-15    | 183.9782687 |
| ATG10    | NM_031482    | 163.1222656 | 0.192996652 | 2.49E-20    | 845.20775   |
| AEBP2    | NM_001114176 | 114.550837  | 1.494764579 | 1.18E-11    | 76.6347013  |
| PML      | NM_033246    | 58.46847084 | 0.13004774  | 9.65E-09    | 449.5923622 |
| MRPS31P5 | NR_051965    | 98.99871632 | 2.199729362 | 8.95E-11    | 45.00495289 |
| AFAP1L1  | NM_001146337 | 63.1222656  | 0.508296261 | 8.98E-08    | 124.1840052 |
| CHCHD10  | NM_001301339 | 207.3050222 | 2.109130429 | 1.12E-23    | 98.28933257 |
| FOXJ2    | NM_018416    | 89.36679679 | 4.290182125 | 4.98E-08    | 20.83053684 |
| MCM8     | NM_001281520 | 98.46847084 | 1.933638668 | 5.02E-10    | 50.92392517 |
| EMC4     | NM_016454    | 86.77477667 | 1.272885313 | 3.34E-11    | 68.1717165  |
| FUS      | NM_001170634 | 277.9382254 | 11.5626957  | 1.59E-24    | 24.03749373 |
| MESP2    | NM_001039958 | 52.48906239 | 8.920340784 | 0.00329114  | 5.884199232 |
| TNK1     | NM_001251902 | 150.162165  | 19.0284196  | 2.27E-09    | 7.891468036 |
| CPSF2    | NM_017437    | 135.3462052 | 0.998456307 | 1.02E-15    | 135.5554612 |
| AMOTL2   | NM_001278685 | 67.03989941 | 6.360961912 | 7.22E-05    | 10.53927069 |
| ALDH3B1  | NM_001290059 | 98.99871632 | 7.674400517 | 3.44E-08    | 12.89986314 |
| CHP1     | NM_007236    | 58.73359358 | 1.838307712 | 8.14E-06    | 31.94981623 |
| SRP9     | NM_003133    | 104.713002  | 1.748491854 | 5.44E-12    | 59.88761217 |
| TRIM38   | NM_006355    | 52.48906239 | 3.711683671 | 0.000351807 | 14.14157752 |
| TARDBP   | NM_007375    | 136.1415735 | 4.282112242 | 1.66E-13    | 31.79308849 |
| PLEKHD1  | NM_001161498 | 37.14285714 | 0.338036971 | 6.81E-05    | 109.8780914 |
| KLHL28   | NM_017658    | 141.3256137 | 0.563956915 | 3.17E-18    | 250.5964726 |
| TRIT1    | NM_017646    | 127.3050222 | 0.276354267 | 2.66E-19    | 460.6587889 |
| MCUR1    | NM_001031713 | 160.7953682 | 2.389269948 | 6.27E-17    | 67.29895396 |
| WDR76    | NM_001167941 | 73.54955335 | 0.412922894 | 3.78E-10    | 178.1193398 |
| C3orf17  | NM_015412    | 96.40669621 | 3.038252034 | 1.45E-09    | 31.73097397 |
| CTU2     | NM_001012759 | 104.1827566 | 5.103850609 | 1.30E-09    | 20.41257955 |
| CCDC115  | NM_032357    | 80.79536822 | 8.235104374 | 7.36E-06    | 9.811092191 |
| CDK1     | NM_001170406 | 49.89704227 | 4.090570002 | 0.000339423 | 12.19806586 |
| PEX11A   | NM_003847    | 101.060491  | 0.15556924  | 7.35E-17    | 649.6174374 |
| VMA21    | NM_001017980 | 100.5302455 | 0.682179707 | 4.00E-14    | 147.366221  |
| FBXO28   | NM_001136115 | 123.6525111 | 1.243229934 | 1.36E-13    | 99.46069321 |
| MMS19    | NM_022362    | 61.59073644 | 5.933781204 | 4.27E-05    | 10.3796777  |
| UBR7     | NR_038150    | 133.0193079 | 1.737965749 | 6.15E-16    | 76.53735865 |
| PRSS23   | NR_120593    | 80.53024548 | 1.177619221 | 6.89E-09    | 68.38394284 |
| XRN1     | NM_001282857 | 87.03989941 | 0.105476271 | 4.61E-12    | 825.208351  |
| SPOCD1   | NM_001281987 | 117.4079799 | 1.85935268  | 3.05E-13    | 63.14454551 |
| SWAP70   | NM_001297714 | 85.97940845 | 1.912832739 | 2.49E-08    | 44.94873321 |
| SMC3     | NM_005445    | 161.5907364 | 1.705353613 | 1.33E-18    | 94.75497351 |
| WDR34    | NM_052844    | 118.9987163 | 7.437620029 | 3.93E-10    | 15.9995692  |
| PEX2     | NM_001079867 | 70.16216501 | 1.958012125 | 1.22E-07    | 35.83336595 |
| FAM86EP  | NR_024253    | 91.95881691 | 6.006212734 | 1.09E-07    | 15.31061602 |
| KIAA1731 | NM_033395    | 106.7747767 | 1.61702957  | 8.80E-11    | 66.03143113 |
| FBXO18   | NM_001258452 | 167.3050222 | 2.572089889 | 7.13E-18    | 65.0463356  |
| STRIP1   | NM_033088    | 106.7747767 | 1.547050976 | 1.97E-12    | 69.01826658 |
| ORMDL3   | NM_139280    | 100.5302455 | 6.643429708 | 1.44E-08    | 15.13228105 |
| DHX29    | NM_019030    | 130.6924105 | 0.636205136 | 7.36E-16    | 205.4249535 |
| ZYG11B   | NM_024646    | 147.0398994 | 0.234000315 | 3.73E-20    | 628.3747932 |
| ZNF57    | NM_173480    | 111.9588169 | 1.94644416  | 4.73E-13    | 57.51966544 |
| ACIN1    | NM_001164816 | 75.08108251 | 7.066100199 | 8.12E-06    | 10.62553324 |
| NUP107   | NM_020401    | 101.060491  | 0.896921526 | 5.82E-11    | 112.6748417 |
| VIPAS39  | NM_022067    | 144.1827566 | 0.040456607 | 1.19E-24    | 3563.886506 |
| PLEKHF2  | NM_024613    | 136.6718189 | 0.330367032 | 1.42E-20    | 413.6969064 |
| ACTN1    | NM_001130004 | 152.2239396 | 3.17504192  | 7.73E-15    | 47.94391491 |
| SLC30A5  | NM_001251969 | 90.42728775 | 2.212108044 | 6.22E-10    | 40.87833233 |
| TRAP1    | NM_016292    | 172.7541851 | 1.937942504 | 2.51E-18    | 89.14309107 |
| MYLK-AS1 | NR_038266    | 64.71300204 | 2.35672472  | 2.21E-06    | 27.45887184 |
| PIIG     | NM_004792    | 71.95881691 | 0.17248316  | 1.37E-10    | 417.1932906 |
| UBE4B    | NM_001105562 | 115.0810825 | 0.334082142 | 4.10E-14    | 344.4694226 |
| RNF170   | NM_001160224 | 105.9794085 | 0.653446814 | 1.97E-12    | 162.1852095 |

|              |              |             |             |             |             |
|--------------|--------------|-------------|-------------|-------------|-------------|
| COPG2        | NM_012133    | 95.08108251 | 0.26103939  | 2.15E-11    | 364.2403637 |
| PDSS2        | NM_020381    | 67.83526763 | 0.470622042 | 1.14E-07    | 144.1395887 |
| APBB2        | NM_001166050 | 75.61132799 | 1.534595768 | 6.94E-07    | 49.27116937 |
| SLC25A12     | NM_003705    | 89.36679679 | 1.251175478 | 9.76E-09    | 71.42626942 |
| TRAF3IP2     | NR_028338    | 49.36679679 | 1.065962363 | 9.56E-06    | 46.31195107 |
| CMPK1        | NM_001136140 | 123.6525111 | 2.400793103 | 9.06E-13    | 51.50485934 |
| DDX26B       | NM_182540    | 71.95881691 | 0.129070744 | 9.44E-11    | 557.5145424 |
| PIGT         | NR_047691    | 127.5701449 | 1.717988632 | 7.11E-16    | 74.2555233  |
| NXF1         | NM_006362    | 197.2020644 | 6.462963132 | 6.05E-19    | 30.51263954 |
| TMED7        | NM_181836    | 55.61132799 | 1.46784941  | 4.85E-06    | 37.88626246 |
| MDM4         | NM_001204172 | 116.4066962 | 2.266395476 | 2.95E-12    | 51.3620405  |
| PLRG1        | NM_001201564 | 87.57014489 | 1.476048067 | 1.31E-10    | 59.32743442 |
| NMU          | NM_001292045 | 140.7953682 | 1.050238297 | 1.92E-16    | 134.0604019 |
| SMAGP        | NM_001031628 | 74.55083703 | 2.181928869 | 1.01E-07    | 34.16740027 |
| PPP2R1B      | NM_002716    | 155.0810825 | 0.787238346 | 3.01E-20    | 196.9938116 |
| RAB10        | NM_016131    | 51.69369417 | 2.648830426 | 0.000101484 | 19.51566761 |
| TMEM116      | NM_138341    | 133.0193079 | 0.487675137 | 3.27E-17    | 272.7621275 |
| LOC100507316 | NR_120682    | 102.3861047 | 17.72061658 | 4.84E-05    | 5.777795833 |
| ICK          | NM_016513    | 100.7953682 | 0.638677476 | 1.29E-12    | 157.8188868 |
| PLA2R1       | NM_007366    | 26.24453119 | 0.009339285 | 0.000197112 | 2810.122066 |
| IL13RA1      | NM_001560    | 88.83655131 | 0.421323566 | 1.66E-11    | 210.851133  |
| PCCA         | NM_001178004 | 100.7953682 | 0.45932587  | 5.57E-11    | 219.4419581 |
| ELMOD2       | NM_153702    | 138.9987163 | 1.24863663  | 8.75E-17    | 111.3203898 |
| WARS         | NM_173701    | 48.36551311 | 1.808711509 | 0.000119038 | 26.74031369 |
| ZNF277       | NM_021994    | 38.73359358 | 0.404797557 | 9.95E-05    | 95.68633227 |
| GNPNAT1      | NM_198066    | 177.9382254 | 3.061338281 | 7.48E-20    | 58.12432636 |
| GNPDA2       | NM_001270880 | 135.611328  | 2.970708721 | 1.42E-13    | 45.64948662 |
| CREBZF       | NR_028027    | 135.3462052 | 4.627491132 | 3.27E-13    | 29.24829057 |
| JAK2         | NM_004972    | 138.2033481 | 0.331098413 | 3.02E-17    | 417.4086693 |
| SEPHS2       | NM_012248    | 99.26383906 | 15.45902235 | 1.42E-05    | 6.421094222 |
| NIP7         | NM_016101    | 78.2033481  | 7.908699271 | 8.72E-06    | 9.888269288 |
| TNFAIP8      | NM_001286817 | 73.81467609 | 1.171685043 | 2.70E-08    | 62.99873546 |
| MAT2A        | NM_005911    | 168.8957586 | 25.68573482 | 1.82E-09    | 6.575469216 |
| NCAPH        | NM_001281711 | 115.0810825 | 4.390856955 | 2.35E-10    | 26.20925338 |
| CDKN1C       | NM_001122631 | 78.46847084 | 14.10369195 | 0.000364427 | 5.563682979 |
| MCM9         | NM_153255    | 91.69369417 | 2.210652462 | 8.35E-10    | 41.4781137  |
| ACAD11       | NM_032169    | 121.3256137 | 0.317889728 | 1.09E-15    | 381.6594338 |
| PPIB         | NM_000942    | 117.6731026 | 12.88966771 | 2.78E-08    | 9.129258042 |
| PWWP2A       | NM_001130864 | 172.4890624 | 0.786139552 | 7.42E-23    | 219.4127773 |
| NR1D1        | NM_021724    | 96.93694168 | 12.8526666  | 2.98E-06    | 7.542165739 |
| ZC3H12A      | NM_025079    | 126.2445312 | 12.37794131 | 6.63E-09    | 10.19915413 |
| RPP40        | NM_006638    | 110.162165  | 2.054390738 | 3.32E-13    | 53.62279093 |
| TPGS1        | NM_033513    | 74.55083703 | 1.325177986 | 5.19E-09    | 56.25722568 |
| SLC25A29     | NM_152333    | 98.46847084 | 4.710685483 | 3.14E-09    | 20.90321487 |
| FLVCR2       | NM_017791    | 52.22393965 | 0.014854136 | 3.21E-09    | 3515.784327 |
| CLPSL2       | NM_001286550 | 41.3256137  | 4.774641012 | 0.004129037 | 8.655229492 |
| SYNRG        | NM_198882    | 103.6525111 | 0.653734365 | 2.63E-12    | 158.5544781 |
| RPS14        | NM_005617    | 155.8764507 | 8.116211348 | 4.31E-14    | 19.20556822 |
| RCL1         | NM_005772    | 72.48906239 | 0.290985126 | 1.61E-09    | 249.1160408 |
| CHID1        | NM_001142677 | 118.4684708 | 3.519263165 | 8.63E-11    | 33.66286216 |
| PARS2        | NM_152268    | 144.4478793 | 5.473633358 | 2.45E-14    | 26.38976158 |
| CDH22        | NM_021248    | 69.10167405 | 1.331170073 | 1.61E-06    | 51.91047746 |
| LOC102723809 | NR_110550    | 52.22393965 | 1.076480238 | 2.11E-05    | 48.51360743 |
| LINC01012    | NR_038293    | 44.71300204 | 2.270655533 | 0.000136822 | 19.69167114 |
| RCHY1        | NM_015436    | 86.24453119 | 2.071151714 | 7.80E-09    | 41.64085645 |
| MKRN1        | NM_001145125 | 93.01930787 | 2.267746701 | 3.39E-10    | 41.01838526 |
| STMN2        | NM_007029    | 41.3256137  | 0.580554132 | 6.56E-05    | 71.18304981 |
| NEMF         | NM_004713    | 108.1003904 | 1.525765002 | 3.71E-11    | 70.84996067 |
| FLNB         | NM_001164319 | 195.611328  | 1.090397716 | 3.59E-20    | 179.394477  |
| CRYZL1       | NM_145858    | 109.8970423 | 1.288459764 | 1.20E-11    | 85.29334428 |
| SAMD8        | NM_001174156 | 149.3667968 | 0.341016495 | 1.41E-20    | 438.0046097 |
| PROSC        | NM_007198    | 118.4684708 | 2.812935987 | 3.53E-12    | 42.1155943  |
| TLL1         | NM_012464    | 32.75418513 | 0.367971457 | 0.00112734  | 89.01284187 |
| NQO1         | NM_001286137 | 84.18275656 | 10.10584068 | 8.92E-06    | 8.330109212 |

|              |              |             |             |             |             |
|--------------|--------------|-------------|-------------|-------------|-------------|
| TMEM50B      | NM_006134    | 148.8365513 | 0.784900821 | 3.88E-19    | 189.62466   |
| TMEM246      | NM_032342    | 129.8970423 | 4.410109519 | 1.52E-12    | 29.45438015 |
| PIR          | NM_003662    | 43.91763382 | 0.575251406 | 5.00E-05    | 76.3451134  |
| PAF1         | NR_046384    | 106.2445312 | 18.98565469 | 1.37E-05    | 5.596042536 |
| ASL          | NM_001024944 | 175.8764507 | 1.743018827 | 2.01E-21    | 100.9033569 |
| GSTK1        | NM_015917    | 194.0797988 | 5.94895098  | 9.08E-20    | 32.62420542 |
| SRD5A3       | NM_024592    | 107.0398994 | 3.257590163 | 5.15E-10    | 32.85861451 |
| CDK20        | NM_001170640 | 35.34620525 | 0.456842992 | 0.000279437 | 77.37057563 |
| KIF1C        | NM_006612    | 66.24453119 | 2.843886165 | 1.82E-06    | 23.29366485 |
| TPRKB        | NM_016058    | 68.63063585 | 4.937459561 | 9.32E-06    | 13.89998946 |
| BDNF-AS      | NR_033312    | 180         | 0.656155484 | 1.34E-20    | 274.3252238 |
| ERBB2        | NM_001289937 | 76.93694168 | 4.013207269 | 1.02E-06    | 19.17093649 |
| NGFR         | NM_002507    | 197.4079799 | 4.544806183 | 8.80E-20    | 43.43595126 |
| TBCEL        | NM_152715    | 63.91763382 | 0.69647678  | 1.38E-07    | 91.77281376 |
| FAM63B       | NM_001040453 | 73.81467609 | 1.058443112 | 1.60E-08    | 69.73891676 |
| ARSG         | NM_014960    | 93.28443061 | 4.941657336 | 6.57E-08    | 18.87715482 |
| CEP63        | NM_001042384 | 81.85585918 | 0.477667378 | 3.48E-10    | 171.3658143 |
| PDRG1        | NM_030815    | 71.22265597 | 5.575423426 | 4.85E-06    | 12.77439407 |
| SP3          | NM_001172712 | 140.7953682 | 3.868405152 | 7.19E-13    | 36.39623118 |
| STEAP1B      | NM_001164460 | 52.22393965 | 0.499629089 | 2.24E-06    | 104.5254186 |
| ZNF74        | NM_001256525 | 141.8558592 | 4.220537847 | 4.87E-14    | 33.61084874 |
| PSMA5        | NM_001199772 | 124.1827566 | 1.91658833  | 8.40E-14    | 64.79365162 |
| ASB16-AS1    | NR_049730    | 145.2432475 | 4.297376113 | 5.81E-15    | 33.79812325 |
| DPM1         | NM_003859    | 113.2844306 | 3.397233165 | 4.19E-11    | 33.34608639 |
| STYK1        | NM_018423    | 46.50965393 | 0.992575029 | 2.13E-05    | 46.85757005 |
| NCOA7        | NM_001122842 | 145.2432475 | 0.413586421 | 6.31E-18    | 351.1799235 |
| HADHB        | NM_001281513 | 100.2651227 | 0.286575619 | 1.53E-14    | 349.8731787 |
| BDH1         | NM_203314    | 106.7747767 | 2.9969537   | 1.31E-10    | 35.62776985 |
| TTPAL        | NM_001039199 | 187.8352676 | 3.965326114 | 3.22E-19    | 47.36943752 |
| LGR4         | NM_018490    | 38.46847084 | 0.329811553 | 0.000159444 | 116.6377299 |
| IVNS1ABP     | NM_006469    | 169.3667968 | 3.939189664 | 1.54E-17    | 42.99533946 |
| DEF6         | NM_022047    | 70.69241049 | 3.637313507 | 3.01E-06    | 19.4353361  |
| FKBP1A       | NM_001199786 | 138.2033481 | 4.075075242 | 1.75E-13    | 33.91430585 |
| VWA8-AS1     | NR_039974    | 121.060491  | 1.057403842 | 3.06E-15    | 114.488416  |
| ACSS2        | NM_018677    | 107.3050222 | 2.514283695 | 5.59E-11    | 42.67816809 |
| TCEAL4       | NM_024863    | 57.93822536 | 6.629719334 | 0.000464864 | 8.739167142 |
| GTF3C2       | NM_001035521 | 53.54955335 | 2.070659551 | 2.51E-05    | 25.86110949 |
| ZNF28        | NR_036600    | 81.06049096 | 0.052150895 | 1.51E-14    | 1554.345143 |
| TMEM164      | NM_032227    | 75.08108251 | 0.723877306 | 2.34E-08    | 103.7207298 |
| GSTO2        | NM_001191014 | 113.2844306 | 1.378825942 | 1.70E-13    | 82.16006618 |
| LOC100288152 | NR_125375    | 132.2239396 | 14.93070443 | 6.09E-09    | 8.855840677 |
| KCTD5        | NM_018992    | 203.6525111 | 2.105526828 | 5.15E-23    | 96.72282887 |
| PELO         | NM_015946    | 95.34620525 | 8.118887045 | 4.90E-07    | 11.74375314 |
| DHRS4        | NM_021004    | 167.5701449 | 2.517253075 | 1.73E-19    | 66.56865237 |
| SULT1A1      | NM_177536    | 103.9176338 | 1.216338012 | 1.21E-12    | 85.43483206 |
| RPS19        | NM_001022    | 78.46847084 | 14.39317389 | 0.000283474 | 5.451783703 |
| ITGB4        | NM_001005731 | 68.36551311 | 7.117202379 | 5.74E-05    | 9.605672211 |
| SNAI1        | NM_005985    | 180.2651227 | 8.55349954  | 7.21E-16    | 21.07501402 |
| ENY2         | NM_001193557 | 194.0797988 | 2.627212295 | 7.93E-23    | 73.87290292 |
| MSLN         | NM_001177355 | 95.34620525 | 4.881778104 | 9.42E-09    | 19.53104038 |
| HEATR6       | NM_022070    | 152.7541851 | 1.122443232 | 3.60E-18    | 136.0907891 |
| G3BP2        | NM_203504    | 121.8558592 | 2.985350253 | 6.42E-12    | 40.81794391 |
| ST20         | NR_037652    | 103.9176338 | 2.769867441 | 6.14E-11    | 37.51718666 |
| EYA3         | NM_001990    | 90.69241049 | 1.634294586 | 7.01E-09    | 55.49330657 |
| ZNF37A       | NM_003421    | 56.14157347 | 0.640239105 | 1.41E-07    | 87.688448   |
| CABIN1       | NM_001199281 | 135.3462052 | 1.637275219 | 3.38E-13    | 82.66551868 |
| ZNF584       | NM_173548    | 89.63191953 | 0.929487649 | 4.54E-12    | 96.43153363 |
| ANKRD12      | NM_015208    | 75.34620525 | 0.575655617 | 1.49E-08    | 130.8876401 |
| SPCS3        | NM_021928    | 169.3667968 | 3.215810648 | 2.32E-18    | 52.66690591 |
| TSPAN6       | NM_003270    | 32.48906239 | 1.076905826 | 0.002135383 | 30.16889833 |
| RNF34        | NM_025126    | 156.4066962 | 3.613453072 | 5.22E-16    | 43.28455167 |
| FBXO41       | NM_001080410 | 88.57142857 | 13.42372079 | 1.09E-05    | 6.598128039 |
| RBBP6        | NM_018703    | 159.5289618 | 1.699596548 | 1.79E-18    | 93.86284176 |
| MZT1         | NM_001071775 | 61.3256137  | 2.024451783 | 3.06E-06    | 30.29245459 |

|            |              |             |             |             |             |
|------------|--------------|-------------|-------------|-------------|-------------|
| OSTC       | NM_021227    | 98.2033481  | 0.350691763 | 3.67E-14    | 280.0275296 |
| ECT2       | NM_001258316 | 79.5289618  | 1.30640916  | 5.08E-08    | 60.87599829 |
| FAHD1      | NM_031208    | 90.69241049 | 2.400451174 | 3.55E-09    | 37.78140187 |
| MAPK7      | NM_139034    | 71.69369417 | 6.274476225 | 1.36E-05    | 11.42624366 |
| PARP11     | NR_104461    | 23.91763382 | 0.102231596 | 0.003313529 | 233.9553979 |
| ZFP1       | NM_153688    | 151.6936942 | 0.633799825 | 6.50E-21    | 239.3400697 |
| 6-Mar      | NM_001270660 | 111.9588169 | 1.970626641 | 4.35E-11    | 56.81381475 |
| BIRC2      | NM_001256166 | 107.3050222 | 1.77514118  | 6.61E-12    | 60.44872565 |
| IQCC       | NM_001160042 | 97.67310262 | 15.02200092 | 6.06E-06    | 6.502003506 |
| NDUFS5     | NM_004552    | 138.7335936 | 3.58355069  | 3.15E-15    | 38.71400339 |
| HEXB       | NM_000521    | 174.8159598 | 1.532493043 | 2.07E-20    | 114.0729222 |
| ATP11B     | NM_014616    | 107.0398994 | 0.489855221 | 1.21E-12    | 218.5133381 |
| G3BP1      | NM_005754    | 132.2239396 | 1.7506132   | 1.06E-14    | 75.53007119 |
| CDAN1      | NM_138477    | 145.9794085 | 7.874268187 | 1.48E-12    | 18.53879052 |
| SERINC3    | NM_198941    | 60.79536822 | 4.06420607  | 5.38E-05    | 14.95873171 |
| FAM83B     | NM_001010872 | 75.34620525 | 0.508763803 | 6.11E-09    | 148.096631  |
| MRPS2      | NM_016034    | 97.93822536 | 17.3181484  | 1.51E-05    | 5.655236524 |
| FN3KRP     | NR_046408    | 89.63191953 | 0.242676169 | 1.01E-13    | 369.3478421 |
| TBC1D12    | NM_015188    | 143.6525111 | 0.262672952 | 9.86E-19    | 546.887336  |
| COL4A3     | NM_000091    | 78.73359358 | 0.995014478 | 6.36E-09    | 79.12808838 |
| C21orf88   | NR_026543    | 46.77477667 | 0.182006269 | 5.31E-07    | 256.9954156 |
| CPSF7      | NM_001136040 | 93.81467609 | 3.327645626 | 1.06E-08    | 28.19250805 |
| MAP3K7     | NM_145332    | 49.10167405 | 1.583779808 | 0.00014887  | 31.0028413  |
| DNAH14     | NM_001145154 | 169.8970423 | 0.485839328 | 1.38E-21    | 349.6980019 |
| RNASEH1    | NM_001286837 | 101.5907364 | 0.699449524 | 2.29E-14    | 145.2438425 |
| ZNF142     | NR_073600    | 59.26383906 | 1.29150618  | 1.78E-06    | 45.88738328 |
| PTGES2     | NM_025072    | 106.5096539 | 8.023677415 | 8.40E-09    | 13.27441875 |
| SSR3       | NM_007107    | 103.6525111 | 3.217190484 | 2.17E-10    | 32.21833198 |
| ATP6V1F    | NM_001198909 | 134.8159598 | 12.97120371 | 1.11E-09    | 10.39348103 |
| EIF2B2     | NM_014239    | 83.91763382 | 5.521443247 | 1.86E-07    | 15.19849613 |
| ZNF653     | NM_138783    | 83.18147288 | 3.944832799 | 1.83E-07    | 21.08618466 |
| TCEANC     | NM_001297564 | 43.38738834 | 1.05057679  | 8.83E-05    | 41.29863589 |
| SNHG1      | NR_003098    | 165.2432475 | 25.17767999 | 2.18E-09    | 6.563084748 |
| ANKRD10    | NM_017664    | 120.7953682 | 5.336523652 | 6.60E-11    | 22.63559128 |
| HS2ST1     | NM_001134492 | 109.8970423 | 1.034827153 | 5.98E-12    | 106.1984525 |
| MRPL21     | NM_181514    | 116.4066962 | 4.473048127 | 4.95E-11    | 26.02402051 |
| PTPRK      | NM_002844    | 135.3462052 | 0.318530448 | 7.59E-15    | 424.9082189 |
| MRPL12     | NM_002949    | 129.8970423 | 6.906054249 | 2.01E-11    | 18.80915463 |
| RPL9       | NM_000661    | 142.1209819 | 15.47426426 | 1.57E-09    | 9.184345023 |
| METTL21A   | NM_145280    | 53.01930787 | 1.012668283 | 3.50E-06    | 52.35604666 |
| SLC36A4    | NM_152313    | 138.2033481 | 0.066730125 | 2.94E-23    | 2071.078819 |
| TOP1       | NM_003286    | 144.1827566 | 1.913882567 | 1.97E-14    | 75.33521599 |
| HECTD2     | NM_001284274 | 100.2651227 | 0.561008449 | 4.96E-12    | 178.7230174 |
| ADAM9      | NR_027638    | 67.83526763 | 1.344819826 | 1.41E-06    | 50.44190033 |
| CAMTA2     | NM_015099    | 135.8764507 | 5.70153802  | 2.21E-12    | 23.83154339 |
| SLC27A4    | NM_005094    | 52.22393965 | 1.84639005  | 3.12E-05    | 28.28434851 |
| FAM200A    | NM_145111    | 64.71300204 | 1.615242026 | 1.61E-07    | 40.06396625 |
| CCDC127    | NM_145265    | 118.7335936 | 0.33243302  | 8.81E-19    | 357.165463  |
| CBX8       | NM_020649    | 82.12098192 | 14.11781037 | 0.000112707 | 5.816835599 |
| ZNF837     | NM_138466    | 155.8764507 | 5.671434131 | 2.47E-15    | 27.48448578 |
| MAP3K3     | NM_002401    | 35.08108251 | 1.763022932 | 0.004159164 | 19.89825649 |
| RAET1E-AS1 | NR_045126    | 38.2033481  | 3.26666122  | 0.002342395 | 11.69492198 |
| AHI1       | NM_001134831 | 163.6525111 | 0.338000062 | 1.15E-19    | 484.1789384 |
| NSRP1      | NM_032141    | 121.8558592 | 1.265416159 | 5.21E-13    | 96.29706267 |
| ATRN       | NM_139322    | 98.2033481  | 0.463415538 | 1.66E-11    | 211.9120748 |
| PTPRJ      | NM_001098503 | 31.95881691 | 0.417698611 | 0.001027433 | 76.51166665 |
| AIF1L      | NM_031426    | 137.1428571 | 3.364239914 | 1.33E-13    | 40.76488617 |
| CHRNA7     | NM_001190455 | 160.5302455 | 0.689207083 | 1.04E-18    | 232.9201912 |
| CEP76      | NR_073537    | 95.61132799 | 1.596059854 | 5.90E-10    | 59.90460054 |
| NOL12      | NM_024313    | 116.4066962 | 13.51022317 | 2.85E-08    | 8.616193436 |
| PLEKHM1    | NR_027782    | 283.4465956 | 11.42634353 | 2.39E-23    | 24.80641292 |
| AXL        | NM_001699    | 98.73359358 | 4.640852316 | 7.91E-09    | 21.27488376 |
| CEP57      | NM_014679    | 103.6525111 | 1.210197743 | 2.71E-11    | 85.64923517 |
| DNAJB6     | NM_058246    | 80.53024548 | 1.526784081 | 7.23E-08    | 52.74501251 |

|               |              |             |             |             |             |
|---------------|--------------|-------------|-------------|-------------|-------------|
| IGSF8         | NM_001206665 | 43.1222656  | 1.733882573 | 7.83E-05    | 24.87034951 |
| RBBP5         | NM_001193273 | 147.3050222 | 0.193374081 | 1.58E-22    | 761.7619758 |
| GRAMD1A       | NM_001136199 | 60.79536822 | 5.129803632 | 6.20E-05    | 11.85140262 |
| SNUPN         | NM_001042588 | 49.10167405 | 3.393947878 | 0.000135333 | 14.46742137 |
| PAOX          | NR_109764    | 29.63191953 | 0.340904502 | 0.000250304 | 86.9214673  |
| ATG101        | NM_001098673 | 120.5302455 | 2.888350118 | 3.65E-13    | 41.72979056 |
| PARN          | NM_001134477 | 181.060491  | 0.762728622 | 2.73E-20    | 237.385206  |
| ASNS          | NM_183356    | 109.3667968 | 2.087047654 | 2.62E-12    | 52.40263516 |
| CTPS1         | NR_125440    | 160.5302455 | 5.651989688 | 3.22E-14    | 28.40243071 |
| LOC100131691  | NR_027334    | 79.5289618  | 14.57222582 | 0.00019537  | 5.457571326 |
| AURKB         | NM_001284526 | 164.1827566 | 11.51076214 | 3.92E-13    | 14.26341319 |
| C2orf76       | NM_001017927 | 90.42728775 | 0.639895308 | 2.29E-11    | 141.3157538 |
| PHF12         | NM_001033561 | 63.65251108 | 2.008255996 | 3.96E-06    | 31.69541692 |
| UTP3          | NM_020368    | 95.61132799 | 9.000368024 | 9.87E-07    | 10.62304649 |
| ZDHHC2        | NM_016353    | 54.81595977 | 0.587409969 | 1.34E-06    | 93.31806179 |
| KIAA0100      | NM_014680    | 106.7747767 | 3.448178854 | 7.63E-10    | 30.96555637 |
| CCNB1IP1      | NM_182852    | 60.79536822 | 2.328300149 | 4.32E-06    | 26.11148234 |
| TMEM165       | NR_073070    | 124.9781248 | 2.266897333 | 1.02E-13    | 55.13179753 |
| RPLP1         | NM_001003    | 184.4478793 | 28.70028984 | 6.21E-10    | 6.426690474 |
| RPTOR         | NM_020761    | 67.30502215 | 0.70402875  | 1.72E-07    | 95.59982057 |
| TRMT5         | NM_020810    | 126.5096539 | 1.712775399 | 1.38E-15    | 73.86237216 |
| HAPI          | NM_177977    | 206.2445312 | 2.998593129 | 6.47E-24    | 68.78043213 |
| HNRNPAB       | NM_004499    | 178.7335936 | 21.65186087 | 9.63E-12    | 8.254883711 |
| SLC22A4       | NM_003059    | 44.97812478 | 1.339694579 | 0.00022077  | 33.57341703 |
| SNHG7         | NR_024543    | 210.162165  | 33.23420867 | 3.94E-11    | 6.3236699   |
| TAF4          | NM_003185    | 77.40797988 | 0.273216038 | 4.67E-10    | 283.3215081 |
| NDUFS1        | NM_001199982 | 69.10167405 | 1.247253417 | 3.55E-07    | 55.40307455 |
| CD59          | NM_203330    | 169.1016741 | 3.725802659 | 1.02E-16    | 45.3866427  |
| SUMO1         | NM_001005781 | 109.3667968 | 1.243855761 | 2.19E-12    | 87.92562626 |
| STAG2         | NM_001282418 | 60.26512274 | 0.615122095 | 6.87E-07    | 97.97261922 |
| BBS7          | NM_176824    | 184.4478793 | 0.384870036 | 8.43E-26    | 479.2471802 |
| SNRNP200      | NM_014014    | 143.3873883 | 2.272423197 | 8.54E-16    | 63.09889309 |
| HR            | NM_018411    | 48.83655131 | 4.446865989 | 0.000601473 | 10.9822404  |
| ERICH1        | NM_207332    | 92.22393965 | 1.333287984 | 2.45E-09    | 69.17030734 |
| NUBP1         | NM_001278506 | 155.611328  | 1.17611199  | 2.44E-19    | 132.309958  |
| NSMAF         | NM_003580    | 74.81595977 | 1.417403842 | 2.64E-07    | 52.7837992  |
| SUOX          | NM_001032387 | 129.3667968 | 4.317450591 | 2.52E-13    | 29.96370059 |
| SLMO2-ATP5E   | NR_037930    | 78.46847084 | 10.98809552 | 2.77E-05    | 7.141225767 |
| NOTCH2NL      | NM_203458    | 233.0193079 | 2.527372763 | 1.50E-24    | 92.19823498 |
| PRDX1         | NM_181696    | 181.3256137 | 10.15673987 | 1.62E-15    | 17.85273779 |
| DBI           | NM_001178017 | 49.36679679 | 7.067734561 | 0.001327222 | 6.984811946 |
| SMARCA4       | NM_001128849 | 54.55083703 | 1.211372155 | 3.86E-06    | 45.03226922 |
| BMP8A         | NM_181809    | 108.8365513 | 1.341696776 | 5.17E-12    | 81.11859048 |
| UEVLD         | NM_001040697 | 137.6731026 | 0.865241159 | 9.03E-16    | 159.1152955 |
| BCL2L2-PABPN1 | NM_001199864 | 121.060491  | 7.09579197  | 2.63E-10    | 17.06088502 |
| SH2D4A        | NM_001174160 | 91.95881691 | 1.143862099 | 2.70E-09    | 80.39327205 |
| CTPS2         | NM_175859    | 80.79536822 | 0.582244881 | 2.38E-09    | 138.7652701 |
| MAP3K8        | NM_005204    | 140.5302455 | 0.954147449 | 1.14E-17    | 147.283573  |
| ARAP1         | NM_001040118 | 55.08108251 | 1.975988852 | 4.08E-05    | 27.87519901 |
| CHKA          | NM_212469    | 57.14285714 | 1.776188915 | 1.97E-05    | 32.17161004 |
| FICD          | NM_007076    | 109.1016741 | 13.53855919 | 2.43E-07    | 8.058588251 |
| RNF103        | NM_001198951 | 157.9382254 | 2.331211945 | 2.27E-17    | 67.74940635 |
| MARS2         | NM_138395    | 143.6525111 | 12.18544585 | 8.39E-11    | 11.78885966 |
| KAT6A         | NM_001099413 | 54.28571429 | 0.537204211 | 2.44E-06    | 101.0522874 |
| ZNF600        | NM_198457    | 74.55083703 | 0.939366835 | 9.97E-09    | 79.36285831 |
| MAP3K14-AS1   | NR_110326    | 121.3256137 | 6.370106764 | 2.41E-10    | 19.04608795 |
| RAD51D        | NR_037711    | 78.46847084 | 0.961351763 | 3.41E-09    | 81.6230581  |
| CKAP5         | NM_001008938 | 75.87645073 | 1.581780702 | 1.91E-07    | 47.96900774 |
| NDUFV3        | NM_001001503 | 147.8352676 | 5.022489635 | 3.84E-14    | 29.43465858 |
| LOC100506990  | NR_040092    | 29.10167405 | 0.82123999  | 0.002430732 | 35.43626029 |
| BSDC1         | NM_001300958 | 91.69369417 | 1.781758795 | 7.97E-10    | 51.46246194 |
| ZNF646        | NM_014699    | 132.2239396 | 6.616140799 | 7.77E-12    | 19.98505529 |
| SOD2          | NM_001024465 | 138.2033481 | 4.314658678 | 2.61E-13    | 32.03111959 |
| NUDT12        | NM_001300741 | 109.6319195 | 0.633919664 | 2.70E-15    | 172.9429229 |

|            |              |             |             |             |             |
|------------|--------------|-------------|-------------|-------------|-------------|
| RPSA       | NM_002295    | 164.1827566 | 16.55128566 | 3.21E-11    | 9.91963766  |
| RDH11      | NM_001252650 | 143.9176338 | 4.563743805 | 2.40E-14    | 31.53499407 |
| RASGRP3    | NM_001139488 | 24.4478793  | 1.196612077 | 0.004928917 | 20.43091473 |
| PLIN3      | NM_001164189 | 48.57142857 | 7.914843521 | 0.003199155 | 6.136751591 |
| AK3        | NM_016282    | 151.9588169 | 2.327329161 | 8.75E-17    | 65.29322086 |
| MINA       | NM_153182    | 149.6319195 | 2.482097637 | 2.22E-16    | 60.28446154 |
| CCDC74A    | NM_138770    | 64.4478793  | 0.833156659 | 3.34E-08    | 77.35385492 |
| MBD3       | NM_001281453 | 62.85714286 | 11.3449064  | 0.0005635   | 5.540560726 |
| CYP4V2     | NM_207352    | 124.713002  | 3.683110123 | 2.04E-12    | 33.86078555 |
| LATS1      | NM_004690    | 126.7747767 | 1.536066105 | 2.75E-13    | 82.53210993 |
| SLC25A44   | NR_104408    | 46.77477667 | 2.697948946 | 0.000182088 | 17.33716153 |
| ABCD4      | NM_005050    | 78.99871632 | 4.787187762 | 3.51E-07    | 16.50211361 |
| TEX22      | NM_001195082 | 103.6525111 | 12.7868873  | 5.37E-07    | 8.106156618 |
| SAFB       | NM_002967    | 104.1827566 | 2.690770815 | 2.16E-10    | 38.71855454 |
| PAN2       | NM_001166279 | 58.46847084 | 3.037626218 | 9.86E-06    | 19.24807947 |
| FAM161A    | NM_032180    | 109.3667968 | 1.913689892 | 6.61E-12    | 57.14969665 |
| UBL7       | NM_201265    | 144.1827566 | 2.74215804  | 8.60E-16    | 52.58003166 |
| ADII       | NM_018269    | 118.7335936 | 2.639692213 | 2.96E-12    | 44.98009011 |
| EZR        | NM_001111077 | 123.1222656 | 14.03645864 | 2.18E-08    | 8.77160463  |
| UBL4A      | NM_014235    | 40.26512274 | 5.08280714  | 0.004129037 | 7.921827767 |
| HERC4      | NM_022079    | 84.4478793  | 0.778668136 | 1.10E-09    | 108.4516951 |
| CDC6       | NM_001254    | 76.40669621 | 1.327426738 | 3.98E-09    | 57.56000993 |
| AGRN       | NM_198576    | 78.2033481  | 2.3068191   | 9.09E-08    | 33.90094529 |
| RPP25L     | NM_148179    | 187.0398994 | 27.61315758 | 1.61E-09    | 6.773578824 |
| SNX1       | NM_003099    | 65.97940845 | 2.027638331 | 2.04E-06    | 32.54002819 |
| RAPGEF6    | NM_016340    | 138.4684708 | 0.35976421  | 2.65E-16    | 384.8867318 |
| NUSAP1     | NM_001243144 | 52.22393965 | 1.475626543 | 5.61E-05    | 35.39102755 |
| PAK4       | NM_005884    | 109.3667968 | 0.648148687 | 6.37E-14    | 168.7372033 |
| ERVMER34-1 | NM_001242690 | 147.0398994 | 4.476753109 | 1.20E-14    | 32.84521077 |
| ZNF711     | NM_021998    | 27.30502215 | 0.149680655 | 0.000250304 | 182.4218517 |
| ZCWPW1     | NM_017984    | 139.5289618 | 1.267704928 | 6.40E-17    | 110.0642261 |
| RPS6KA5    | NM_004755    | 84.4478793  | 0.050031685 | 6.53E-13    | 1687.887959 |
| PSMG4      | NM_001128592 | 132.2239396 | 7.101604802 | 1.06E-11    | 18.61888169 |
| MFGE8      | NM_001114614 | 161.5907364 | 8.353708396 | 3.10E-14    | 19.34359314 |
| ACBD3      | NM_022735    | 110.162165  | 0.555287144 | 8.55E-14    | 198.3877464 |
| NTHL1      | NM_002528    | 56.14157347 | 6.00399332  | 0.000231852 | 9.350705517 |
| CDCA7L     | NM_001127371 | 227.8352676 | 1.810243488 | 2.29E-26    | 125.8589075 |
| FOXM1      | NM_001243088 | 34.81595977 | 1.79593061  | 0.002576274 | 19.38602726 |
| EP300      | NM_001429    | 81.06049096 | 1.400781984 | 7.23E-08    | 57.86802794 |
| RNF216     | NM_207116    | 70.16216501 | 1.634640211 | 1.01E-06    | 42.92208435 |
| TMEM184A   | NM_001097620 | 93.01930787 | 8.537651112 | 5.02E-07    | 10.89518729 |
| TIFA       | NM_052864    | 135.611328  | 3.046287602 | 2.32E-14    | 44.51691557 |
| VPS26A     | NM_001035260 | 86.24453119 | 1.531745288 | 8.00E-09    | 56.30474717 |
| PRPSAP1    | NM_002766    | 97.7323099  | 1.54912068  | 2.89E-10    | 63.08889368 |
| DNM2       | NM_004945    | 112.7541851 | 3.316501476 | 1.08E-10    | 33.99793003 |
| PPM1B      | NM_002706    | 131.4285714 | 1.481930765 | 5.83E-14    | 88.68738981 |
| RWDD3      | NR_103484    | 151.6936942 | 0.86633396  | 1.44E-20    | 175.0984046 |
| EIF4ENIF1  | NM_019843    | 41.3256137  | 2.199316469 | 0.00109141  | 18.79020791 |
| RPAP3      | NM_001146076 | 129.8970423 | 0.267996344 | 2.66E-19    | 484.6970687 |
| FAM219A    | NM_001184943 | 52.48906239 | 0.684876294 | 3.23E-06    | 76.64020915 |
| IRS2       | NM_003749    | 34.28571429 | 2.159858038 | 0.003555657 | 15.87405917 |
| KDELR1     | NM_006801    | 114.550837  | 4.549847623 | 3.57E-11    | 25.1768513  |
| ATF7IP2    | NR_045816    | 73.54955335 | 0.040044558 | 3.61E-12    | 1836.692869 |
| SH3TC2     | NM_024577    | 47.03989941 | 0.988711715 | 2.76E-05    | 47.57696171 |
| HIST1H2BK  | NM_080593    | 57.93822536 | 1.609197634 | 9.01E-07    | 36.00441868 |
| JMJD4      | NM_023007    | 221.5907364 | 18.23715769 | 1.79E-16    | 12.15050833 |
| ZWINT      | NM_001005413 | 63.65251108 | 1.332876481 | 9.58E-08    | 47.75574632 |
| CYP20A1    | NM_177538    | 36.67181894 | 3.413889727 | 0.002421489 | 10.74194596 |
| NARF       | NM_012336    | 112.2831469 | 0.620792685 | 2.69E-14    | 180.8706025 |
| CDKN2AIPNL | NM_080656    | 126.7747767 | 6.309707135 | 4.13E-11    | 20.09202233 |
| EIF3K      | NM_001300992 | 55.87645073 | 5.36493492  | 9.73E-05    | 10.41512182 |
| MSH4       | NM_002440    | 80.79536822 | 0.178789095 | 1.07E-10    | 451.9032231 |
| SH3RF1     | NM_020870    | 90.42728775 | 1.795123697 | 1.03E-08    | 50.37384773 |
| VAX2       | NM_012476    | 115.3462052 | 1.889693772 | 1.91E-12    | 61.03962821 |

|              |              |             |             |             |             |
|--------------|--------------|-------------|-------------|-------------|-------------|
| DEPDC5       | NM_001242897 | 101.5907364 | 1.721916647 | 5.99E-10    | 58.99863773 |
| PRODH        | NM_001195226 | 78.73359358 | 2.859130243 | 3.11E-08    | 27.53760301 |
| DDX31        | NM_022779    | 106.7747767 | 2.560841176 | 2.16E-10    | 41.69519675 |
| LOC730101    | NR_024403    | 113.5495533 | 4.881500653 | 1.16E-10    | 23.26119802 |
| ACADVL       | NM_001033859 | 111.9588169 | 27.21454167 | 4.50E-05    | 4.113933583 |
| SWI5         | NM_001040011 | 127.3050222 | 7.022547015 | 6.66E-11    | 18.12804128 |
| MCU          | NM_001270679 | 104.1827566 | 0.754982447 | 1.74E-11    | 137.9936142 |
| LOC102723354 | NR_110546    | 69.63191953 | 2.687181133 | 2.04E-07    | 25.91262594 |
| DHCR24       | NM_014762    | 135.3462052 | 2.367434806 | 2.31E-14    | 57.169982   |
| TRIM36       | NM_001300759 | 169.6319195 | 0.866131101 | 1.29E-20    | 195.8501655 |
| IFT74        | NM_001099223 | 101.5907364 | 0.526276486 | 2.51E-12    | 193.0368147 |
| LOC158960    | NR_103768    | 28.83655131 | 1.136197784 | 0.002055408 | 25.37986935 |
| TMCC1-AS1    | NR_037893    | 50.42728775 | 1.998166953 | 2.22E-05    | 25.23677397 |
| TPI1         | NM_001159287 | 149.1016741 | 35.56492279 | 2.50E-06    | 4.192380086 |
| LRP11        | NM_032832    | 164.4478793 | 2.180756714 | 6.19E-18    | 75.40863143 |
| PTPN13       | NM_080684    | 170.9575332 | 0.679455154 | 2.89E-19    | 251.609738  |
| MAD2L2       | NM_006341    | 94.81595977 | 9.022733118 | 6.33E-07    | 10.50856304 |
| TARS         | NR_047678    | 36.93694168 | 1.714361266 | 0.001495598 | 21.54559976 |
| NSUN2        | NM_001193455 | 94.28571429 | 2.547781894 | 1.07E-09    | 37.00698027 |
| DUSP10       | NR_111940    | 52.22393965 | 0.750054741 | 2.14E-06    | 69.6268376  |
| TMEM219      | NM_194280    | 100.7953682 | 2.962505432 | 1.40E-10    | 34.0236906  |
| ZMYM6NB      | NM_001195156 | 132.7541851 | 9.032806395 | 8.97E-11    | 14.69689256 |
| MTMR14       | NM_001077526 | 80.79536822 | 0.916898616 | 1.62E-08    | 88.11810467 |
| F11R         | NM_016946    | 45.24324752 | 4.045686008 | 0.001349562 | 11.18308426 |
| IKBKB        | NR_040009    | 63.38738834 | 1.315561422 | 3.48E-06    | 48.18276615 |
| TBC1D31      | NM_145647    | 154.6100443 | 0.512537031 | 6.36E-20    | 301.6563391 |
| TOPORS       | NM_001195622 | 104.1827566 | 1.388508664 | 3.00E-13    | 75.03212568 |
| ZWILCH       | NM_001287823 | 83.1222656  | 1.481939965 | 1.35E-08    | 56.0901707  |
| PTPLAD1      | NM_016395    | 115.3462052 | 1.73291893  | 4.42E-12    | 66.56180116 |
| PARK7        | NM_007262    | 146.7747767 | 1.783730139 | 2.85E-17    | 82.28530397 |
| TIMM23       | NM_006327    | 81.3256137  | 3.801916329 | 5.33E-07    | 21.39069003 |
| PPP1R35      | NM_145030    | 115.611328  | 22.8279343  | 8.15E-05    | 5.064467351 |
| LOC100996437 | NR_110037    | 152.2239396 | 3.302188197 | 1.62E-16    | 46.0978995  |
| MAPK8IP3     | NM_001040439 | 109.1016741 | 2.406593862 | 7.59E-11    | 45.33447699 |
| HSPB8        | NM_014365    | 43.38738834 | 1.213709379 | 0.000148446 | 35.74775731 |
| PPFIBP1      | NM_177444    | 135.3462052 | 1.792807897 | 3.99E-13    | 75.49398095 |
| LINC00933    | NR_038274    | 46.77477667 | 0.805270418 | 1.21E-05    | 58.08580026 |
| PTP4A1       | NM_003463    | 67.03989941 | 15.06995802 | 0.002385317 | 4.448579043 |
| ASB3         | NM_016115    | 112.2239396 | 1.156966412 | 2.94E-11    | 96.9984422  |
| TM2D2        | NM_001024380 | 121.3256137 | 5.897294058 | 6.46E-11    | 20.57309887 |
| LOC100506127 | NM_001282456 | 124.713002  | 2.117897424 | 4.87E-14    | 58.88528908 |
| RPS20        | NM_001146227 | 172.7541851 | 19.67407676 | 4.23E-11    | 8.780802637 |
| H1FX-AS1     | NR_026991    | 132.4890624 | 1.68353111  | 5.72E-17    | 78.6971275  |
| SPTLC1       | NM_006415    | 97.93822536 | 1.873894821 | 1.36E-09    | 52.26452642 |
| KCNK1        | NM_002245    | 51.69369417 | 0.648871038 | 2.95E-06    | 79.66713132 |
| RBMX         | NM_001164803 | 157.9382254 | 6.598864485 | 1.92E-14    | 23.93415196 |
| DHRS12       | NM_001031719 | 152.7541851 | 4.377152249 | 1.51E-14    | 34.89807446 |
| LINC00511    | NR_033876    | 44.4478793  | 2.909184329 | 0.000298997 | 15.27846787 |
| RUFY1        | NM_025158    | 157.4079799 | 4.630356989 | 1.71E-14    | 33.99478274 |
| APOO         | NR_026545    | 57.14285714 | 0.489632221 | 5.15E-07    | 116.7056716 |
| DHX35        | NM_001190809 | 69.89704227 | 1.32091415  | 1.05E-06    | 52.91565865 |
| NSUN4        | NR_045790    | 77.93822536 | 4.647336345 | 1.03E-06    | 16.77051532 |
| CSPP1        | NM_024790    | 135.8764507 | 1.031942213 | 1.89E-15    | 131.6706004 |
| NME1         | NM_000269    | 233.5495533 | 7.891918126 | 1.44E-22    | 29.59350941 |
| LEO1         | NM_001286430 | 109.1016741 | 2.518304741 | 2.22E-11    | 43.32345974 |
| RNF8         | NM_183078    | 131.9588169 | 0.806707682 | 7.36E-16    | 163.5769931 |
| LOC101928580 | NR_120556    | 49.36679679 | 1.602255715 | 3.19E-05    | 30.81081023 |
| EFTUD1       | NM_001040610 | 107.0398994 | 0.195376354 | 4.61E-14    | 547.8651712 |
| EXOC1        | NM_001024924 | 84.4478793  | 0.818720217 | 1.38E-10    | 103.1462    |
| METTTL7B     | NM_152637    | 58.73359358 | 12.68529944 | 0.002515788 | 4.630051807 |
| CCDC43       | NM_144609    | 106.5096539 | 1.954269864 | 7.82E-12    | 54.50099595 |
| AGAP2        | NM_014770    | 75.34620525 | 7.889346362 | 1.20E-05    | 9.550373603 |
| C1orf43      | NM_001098616 | 66.50965393 | 5.005304574 | 9.55E-06    | 13.28783353 |
| SMARCAD1     | NM_001128429 | 91.95881691 | 0.761736994 | 7.22E-11    | 120.7225297 |



|           |              |             |             |             |             |
|-----------|--------------|-------------|-------------|-------------|-------------|
| KAT2A     | NM_021078    | 71.95881691 | 3.178586181 | 3.65E-07    | 22.63862384 |
| ANO10     | NM_018075    | 94.28571429 | 0.136102075 | 5.76E-12    | 692.7573618 |
| C11orf65  | NM_152587    | 84.18275656 | 0.26433252  | 4.79E-11    | 318.4729467 |
| TERF1     | NM_017489    | 144.1827566 | 0.294528483 | 2.09E-20    | 489.537565  |
| TMEM161B  | NM_001289008 | 93.28443061 | 0.589633223 | 1.11E-11    | 158.2075552 |
| ARPC1B    | NM_005720    | 166.7747767 | 10.75964086 | 5.00E-13    | 15.50003192 |
| FAM160A2  | NM_032127    | 81.85585918 | 1.77318806  | 4.99E-09    | 46.16310081 |
| DPYSL5    | NM_001253723 | 69.36679679 | 0.012378637 | 1.99E-12    | 5603.750924 |
| ELP5      | NM_203413    | 90.95753323 | 20.34566021 | 0.00012875  | 4.470611044 |
| TBCC      | NM_003192    | 109.3667968 | 11.60760982 | 6.07E-07    | 9.42199113  |
| FAM86B1   | NR_003494    | 89.10167405 | 2.780093483 | 4.76E-09    | 32.04988415 |
| XBP1      | NM_005080    | 183.3873883 | 12.91196839 | 1.99E-14    | 14.20289942 |
| IL27RA    | NM_004843    | 89.89704227 | 1.690405471 | 5.92E-10    | 53.18075681 |
| FKBP9     | NM_007270    | 165.5083703 | 2.394242211 | 1.31E-17    | 69.12766366 |
| PRPF6     | NM_012469    | 59.26383906 | 0.904630349 | 3.34E-07    | 65.51166358 |
| EIF5      | NM_001969    | 115.0810825 | 15.59477947 | 5.34E-07    | 7.379462    |
| FECH      | NM_000140    | 92.22393965 | 0.784532485 | 2.08E-10    | 117.5527354 |
| ZBTB37    | NM_001122770 | 86.77477667 | 1.444920277 | 5.74E-10    | 60.05506192 |
| POLDIP2   | NM_001290145 | 115.611328  | 7.215070491 | 1.77E-09    | 16.02358953 |
| CCNI      | NM_006835    | 55.87645073 | 4.282930084 | 0.00011137  | 13.046314   |
| NOTCH1    | NM_017617    | 35.08108251 | 1.593920074 | 0.003718699 | 22.00931093 |
| PPP1R21   | NM_001135629 | 143.6525111 | 0.997971012 | 1.09E-15    | 143.9445729 |
| FAM110A   | NM_001289147 | 86.50965393 | 11.86760924 | 1.61E-05    | 7.289560364 |
| ORC6      | NR_037620    | 101.060491  | 3.174163246 | 7.54E-11    | 31.83846675 |
| ZKSCAN3   | NM_001242895 | 81.3256137  | 3.705083076 | 2.67E-07    | 21.94974095 |
| FASTKD3   | NR_036553    | 72.48906239 | 1.156085553 | 4.41E-09    | 62.7021609  |
| ZNF451    | NM_001257273 | 107.0398994 | 4.374784505 | 4.89E-10    | 24.46746789 |
| LOC643770 | NR_038383    | 71.69369417 | 2.520333598 | 1.60E-07    | 28.44611294 |
| FAM45A    | NM_207009    | 269.6319195 | 1.779655409 | 8.12E-32    | 151.5079369 |
| ZDBF2     | NM_001285549 | 35.08108251 | 0.589672514 | 0.000257125 | 59.49248386 |
| ATXN7L1   | NM_020725    | 106.5096539 | 1.08298773  | 2.01E-11    | 98.34797849 |
| KIZ       | NM_001163022 | 106.7747767 | 0.442598724 | 7.03E-13    | 241.2451074 |
| SAC3D1    | NM_013299    | 86.77477667 | 20.96856988 | 0.000490229 | 4.138325941 |
| GMPR      | NM_006877    | 57.93822536 | 1.628488204 | 1.64E-05    | 35.57792143 |
| RBM23     | NM_018107    | 105.7142857 | 3.402258617 | 2.20E-10    | 31.07179601 |
| KIAA0226  | NM_014687    | 92.75418513 | 0.628638339 | 2.29E-11    | 147.54777   |
| MPV17L2   | NM_032683    | 76.14157347 | 17.36213112 | 0.000775655 | 4.385496972 |
| EDRF1     | NR_110859    | 90.16216501 | 1.444639088 | 1.25E-09    | 62.41155025 |
| DNA2      | NR_102264    | 30.16216501 | 0.987893537 | 0.000989936 | 30.53179709 |
| TCTN1     | NM_024549    | 120.7953682 | 0.37601811  | 2.46E-16    | 321.2488044 |
| FASN      | NM_004104    | 215.8764507 | 5.459484636 | 1.15E-21    | 39.54154378 |
| GNE       | NM_005476    | 75.87645073 | 2.211704506 | 1.13E-07    | 34.30677584 |
| PRRG1     | NM_000950    | 100         | 0.233371919 | 2.60E-13    | 428.5005679 |
| ZNF322    | NM_001242798 | 114.0797988 | 1.311516844 | 1.70E-13    | 86.98309848 |
| CEP70     | NM_001288966 | 118.7335936 | 0.149149123 | 1.46E-17    | 796.073023  |
| ARFIP1    | NM_001025593 | 75.87645073 | 0.691964245 | 7.47E-09    | 109.6537159 |
| UGP2      | NM_001001521 | 86.50965393 | 2.615440775 | 1.89E-08    | 33.07651038 |
| ASB6      | NM_001202403 | 78.2033481  | 18.85766236 | 0.00158932  | 4.147033    |
| RFX2      | NM_000635    | 63.38738834 | 0.958913442 | 4.03E-07    | 66.10334735 |
| TFEB      | NM_007162    | 51.95881691 | 2.588703953 | 7.99E-05    | 20.07136306 |
| TSGA10    | NM_025244    | 89.63191953 | 1.76671018  | 1.86E-08    | 50.73379922 |
| FITM2     | NM_001080472 | 87.03989941 | 4.312101406 | 7.89E-08    | 20.18503074 |
| CEBPA     | NM_004364    | 226.2445312 | 19.14085959 | 6.72E-16    | 11.81997758 |
| KLF5      | NM_001730    | 85.97940845 | 6.09121456  | 7.22E-07    | 14.11531438 |
| SMDT1     | NM_033318    | 126.7747767 | 5.105526864 | 3.38E-12    | 24.83089014 |
| ABHD6     | NM_020676    | 106.5096539 | 1.418356432 | 4.36E-11    | 75.09371516 |
| TEX264    | NR_103463    | 93.28443061 | 2.460655218 | 9.25E-10    | 37.91040286 |
| FOXRED2   | NM_001102371 | 118.4684708 | 0.27185714  | 6.94E-18    | 435.7747267 |
| PYGO2     | NM_138300    | 155.611328  | 9.876754889 | 6.45E-13    | 15.75530928 |
| ZFAND1    | NR_033193    | 167.0398994 | 1.91963098  | 4.27E-19    | 87.01667205 |
| CDNF      | NM_001029954 | 140.2651227 | 1.566754328 | 2.18E-17    | 89.52592009 |
| SPNS1     | NM_001142448 | 60.79536822 | 0.993722575 | 1.40E-07    | 61.17941742 |
| C10orf88  | NM_024942    | 100.7953682 | 1.088344293 | 5.19E-12    | 92.6134945  |
| ILVBL     | NM_006844    | 67.30502215 | 3.238366481 | 1.59E-06    | 20.78363352 |

|             |              |             |             |             |             |
|-------------|--------------|-------------|-------------|-------------|-------------|
| BCAS2       | NM_005872    | 116.4066962 | 0.383786686 | 6.94E-18    | 303.3109287 |
| UBE2K       | NM_001111112 | 152.7541851 | 2.505937034 | 3.24E-15    | 60.95691274 |
| NSUN5       | NM_001168347 | 49.36679679 | 3.244049774 | 0.000174979 | 15.21764468 |
| BCKDK       | NM_001271926 | 97.67310262 | 15.01329992 | 4.74E-06    | 6.505771756 |
| LUC7L3      | NM_006107    | 193.8146761 | 4.152303986 | 1.73E-19    | 46.6764179  |
| UPK3A       | NM_006953    | 64.18275656 | 3.149283418 | 7.26E-06    | 20.38011447 |
| SMAD5       | NM_005903    | 177.6731026 | 0.663486577 | 2.25E-22    | 267.7870343 |
| RPS13       | NM_001017    | 112.7541851 | 8.414253672 | 9.64E-09    | 13.40037863 |
| MRE11A      | NM_005590    | 49.89704227 | 0.93867659  | 1.21E-05    | 53.15679841 |
| FAM154B     | NM_001008226 | 52.75418513 | 1.778387604 | 3.21E-05    | 29.66405356 |
| RTF1        | NM_015138    | 175.0810825 | 2.543805345 | 5.10E-18    | 68.82644652 |
| TOR1AIP2    | NM_022347    | 98.46847084 | 1.959739257 | 4.80E-11    | 50.24570004 |
| PXYLP1      | NM_152282    | 100.2651227 | 1.669548735 | 3.49E-10    | 60.0552237  |
| LNPEP       | NM_005575    | 102.6512274 | 0.847379793 | 5.01E-12    | 121.1395743 |
| ISCA2       | NM_001272007 | 120.7953682 | 6.892941383 | 1.51E-09    | 17.52450246 |
| IP6K1       | NM_153273    | 69.89704227 | 0.345295468 | 4.75E-09    | 202.4267582 |
| FUT11       | NM_173540    | 141.060491  | 20.30318388 | 3.98E-08    | 6.947702969 |
| ELFN1-AS1   | NR_120510    | 111.6936942 | 3.547366046 | 2.01E-11    | 31.48637404 |
| ACP6        | NM_016361    | 149.1016741 | 1.858503795 | 1.34E-17    | 80.22672562 |
| UHRF1BP1    | NM_017754    | 175.0810825 | 0.872193524 | 1.25E-19    | 200.7365083 |
| ADAMTSL4    | NM_025008    | 45.97940845 | 4.659105457 | 0.000810875 | 9.868720268 |
| HGH1        | NM_016458    | 347.3050222 | 48.57145529 | 1.12E-18    | 7.150393581 |
| FAM134C     | NM_178126    | 130.162165  | 1.613739816 | 4.64E-15    | 80.65870576 |
| OGFR        | NM_007346    | 54.55083703 | 8.968914915 | 0.002154517 | 6.082211454 |
| ARHGEF10L   | NM_018125    | 40.79536822 | 0.872563604 | 0.000148978 | 46.75346078 |
| PHACTR2     | NM_001100164 | 115.3462052 | 0.780366069 | 5.85E-13    | 147.8103801 |
| MRPL35      | NM_016622    | 55.87645073 | 2.189718147 | 4.57E-06    | 25.51764518 |
| LEPROTL1    | NM_015344    | 86.77477667 | 1.053104696 | 5.08E-11    | 82.39900267 |
| RAB24       | NR_109790    | 61.3256137  | 8.457039772 | 0.0004102   | 7.251427846 |
| MTPN        | NM_145808    | 109.6319195 | 0.915220003 | 3.63E-12    | 119.7875037 |
| PITPNM1     | NM_004910    | 131.9588169 | 5.057886025 | 1.97E-12    | 26.08971737 |
| BPNT1       | NM_001286150 | 83.91763382 | 1.172091114 | 4.13E-09    | 71.59651054 |
| ZNF589      | NM_016089    | 150.162165  | 1.562379722 | 8.01E-18    | 96.11118405 |
| ST7         | NM_018412    | 38.99871632 | 0.795947275 | 0.000166358 | 48.9966076  |
| NAE1        | NM_001286500 | 149.6319195 | 2.006108975 | 5.57E-17    | 74.58813126 |
| GATS        | NM_178831    | 38.2033481  | 2.049030981 | 0.002249652 | 18.64459271 |
| PAICS       | NM_001079525 | 95.87645073 | 4.473976761 | 7.47E-09    | 21.42980526 |
| RAB4B-EGLN2 | NR_037791    | 78.46847084 | 5.548211044 | 1.42E-06    | 14.143022   |
| HEBP1       | NM_015987    | 112.4890624 | 2.606968106 | 5.19E-12    | 43.1493819  |
| UBE2J2      | NM_194315    | 49.36679679 | 5.384125725 | 0.000724327 | 9.168953199 |
| UBE2A       | NM_003336    | 78.2033481  | 3.416561766 | 1.33E-07    | 22.88948758 |
| NIT2        | NM_020202    | 123.9176338 | 3.573540323 | 3.46E-12    | 34.67643362 |
| DUSP4       | NM_001394    | 169.1016741 | 11.33038037 | 2.13E-13    | 14.92462464 |
| C12orf49    | NM_024738    | 155.8764507 | 0.189894493 | 2.71E-25    | 820.8581964 |
| BTAF1       | NM_003972    | 75.34620525 | 0.802813035 | 1.46E-08    | 93.85274273 |
| U2AF2       | NM_007279    | 130.162165  | 7.588563735 | 2.13E-11    | 17.15241112 |
| TSC22D1     | NM_006022    | 136.1415735 | 28.91488006 | 1.98E-06    | 4.708356846 |
| KNOP1       | NM_001012991 | 89.63191953 | 4.711702825 | 1.07E-07    | 19.02325398 |
| PLBD2       | NM_001159727 | 136.1415735 | 1.17547192  | 1.84E-16    | 115.8186522 |
| HIRIP3      | NM_003609    | 98.2033481  | 24.14310914 | 0.000342054 | 4.067551843 |
| PCYOX1L     | NM_001301054 | 123.6525111 | 8.345816045 | 3.48E-10    | 14.8161079  |
| TRAPPC3     | NR_073097    | 136.9369417 | 3.611015225 | 8.13E-14    | 37.92200618 |
| SLC35C2     | NM_001281460 | 131.4285714 | 4.331716054 | 1.56E-12    | 30.34099414 |
| SMIM11      | NM_058182    | 78.99871632 | 3.021444762 | 9.19E-08    | 26.14600714 |
| USP39       | NM_001256726 | 113.0193079 | 1.746230316 | 1.44E-12    | 64.72187936 |
| LINC00910   | NR_027412    | 155.7606562 | 4.633351227 | 5.08E-15    | 33.61727799 |
| PXK         | NM_001289100 | 51.42857143 | 0.928461927 | 6.47E-06    | 55.39114738 |
| ELF2        | NM_001276458 | 111.9588169 | 3.47360798  | 1.32E-10    | 32.23127582 |
| FNDC3B      | NM_022763    | 110.4272878 | 1.072418214 | 6.42E-12    | 102.9703583 |
| TUBB3       | NM_006086    | 281.3256137 | 6.622394817 | 2.32E-28    | 42.48094858 |
| NFE2        | NM_001136023 | 43.91763382 | 1.090791883 | 4.96E-05    | 40.26215677 |
| SREK1       | NM_139168    | 34.81595977 | 0.021516721 | 5.15E-06    | 1618.088571 |
| RBMS1       | NM_002897    | 52.48906239 | 1.024237306 | 1.02E-05    | 51.24697382 |
| ABCA2       | NM_001606    | 54.28571429 | 1.161961528 | 7.28E-06    | 46.71902898 |

|                       |              |             |             |             |             |
|-----------------------|--------------|-------------|-------------|-------------|-------------|
| TUBGCP2               | NM_001256618 | 95.08108251 | 0.182202208 | 5.00E-15    | 521.8437452 |
| IQGAP1                | NM_003870    | 94.55083703 | 0.964646132 | 1.02E-10    | 98.01608473 |
| APBA3                 | NM_004886    | 127.3050222 | 3.737015886 | 5.34E-13    | 34.06595692 |
| ARRDC3                | NM_020801    | 96.40669621 | 9.914507702 | 3.27E-07    | 9.723800627 |
| ZFX                   | NM_001178085 | 31.42857143 | 0.197128257 | 0.000358374 | 159.4320973 |
| ABHD12                | NM_001042472 | 69.89704227 | 1.768150885 | 1.51E-06    | 39.5311525  |
| WDR4                  | NR_048535    | 112.7541851 | 4.111068461 | 2.51E-10    | 27.42697822 |
| ZNF107                | NM_001013746 | 83.1222656  | 0.676589048 | 1.41E-10    | 122.8548789 |
| MTRF1L                | NM_001114184 | 101.3256137 | 5.591800005 | 1.46E-08    | 18.12039301 |
| PMS1                  | NR_110332    | 224.1827566 | 0.870873642 | 1.23E-25    | 257.422829  |
| SLC35D2               | NR_104627    | 32.22393965 | 1.21117688  | 0.00112734  | 26.60547784 |
| PRDM11                | NM_001256696 | 142.1209819 | 1.816112314 | 1.02E-14    | 78.25561273 |
| NIT1                  | NM_001185093 | 94.81595977 | 14.26680785 | 1.12E-05    | 6.64591272  |
| PLEKHJ1               | NM_018049    | 69.63191953 | 15.53043    | 0.001390586 | 4.483579625 |
| TCTN3                 | NM_001143973 | 46.30373848 | 2.1952208   | 0.000222794 | 21.09297547 |
| CEP95                 | NM_138363    | 121.8558592 | 5.624039361 | 2.72E-11    | 21.66696414 |
| NBN                   | NM_002485    | 170.4272878 | 0.073860789 | 2.17E-29    | 2307.412231 |
| CXorf40A              | NM_001171907 | 35.34620525 | 0.594644424 | 0.000279437 | 59.44090922 |
| DST                   | NM_001144769 | 67.30502215 | 0.74398659  | 1.86E-07    | 90.46537004 |
| KANSL1-AS1            | NR_034172    | 161.5907364 | 23.02844633 | 1.30E-09    | 7.017005582 |
| BAX                   | NM_001291431 | 89.63191953 | 9.607394698 | 2.99E-06    | 9.329471969 |
| ASHIL                 | NM_018489    | 41.06049096 | 0.837434897 | 0.00016159  | 49.03126335 |
| BARD1                 | NR_104212    | 95.34620525 | 0.297175475 | 1.73E-12    | 320.8414334 |
| FAM127B               | NM_001134321 | 100.2651227 | 15.48552884 | 3.52E-05    | 6.474762584 |
| SOCS2                 | NM_001270467 | 81.06049096 | 17.73356405 | 0.000331249 | 4.571020847 |
| JADE1                 | NM_001287443 | 78.2033481  | 1.903590513 | 1.45E-07    | 41.08202241 |
| PCMT1                 | NM_001252051 | 122.1209819 | 0.791930942 | 6.60E-14    | 154.2066049 |
| GALNT11               | NM_022087    | 154.550837  | 1.386056995 | 4.39E-16    | 111.5039552 |
| UBLCP1                | NM_145049    | 155.611328  | 3.000181451 | 3.75E-16    | 51.86730554 |
| SP2                   | NM_003110    | 84.97812478 | 5.328141872 | 2.00E-07    | 15.94892306 |
| HDHD1                 | NM_001178135 | 54.55083703 | 0.824523057 | 2.71E-06    | 66.16047494 |
| MAPKBP1               | NM_001265611 | 96.93694168 | 2.727991306 | 1.22E-09    | 35.53418277 |
| RACGAP1               | NM_001126104 | 54.81595977 | 2.353156432 | 3.14E-05    | 23.29465182 |
| LOC100499484-C9ORF174 | NR_036529    | 144.1827566 | 0.065055477 | 2.06E-22    | 2216.304673 |
| SACS                  | NM_001278055 | 155.3462052 | 0.812268067 | 1.05E-18    | 191.2499229 |
| AFAP1                 | NM_001134647 | 110.6924105 | 1.885622868 | 9.96E-11    | 58.70336659 |
| DYNLL1                | NM_001037495 | 160.7953682 | 14.89287479 | 2.88E-11    | 10.7967985  |
| LOC102288414          | NR_104414    | 166.2445312 | 9.724924694 | 9.91E-14    | 17.09468571 |
| AMZ2                  | NM_001289056 | 153.5495533 | 10.80278052 | 3.88E-12    | 14.21389179 |
| FKBP3                 | NM_002013    | 147.0398994 | 6.808742535 | 3.80E-13    | 21.59574968 |
| MPP6                  | NM_016447    | 63.38738834 | 0.280677712 | 7.57E-08    | 225.8369142 |
| FASTKD2               | NM_001136193 | 40.79536822 | 1.432953527 | 0.000713179 | 28.46942866 |
| CRBN                  | NM_001173482 | 66.77477667 | 0.294645449 | 1.15E-09    | 226.6275517 |
| PHLDB1                | NM_001144758 | 105.9794085 | 6.753111658 | 2.23E-08    | 15.69341865 |
| CLASP1                | NM_001142273 | 87.30502215 | 0.956475626 | 1.32E-09    | 91.27783273 |
| NDUFS8                | NM_002496    | 81.06049096 | 8.373506889 | 3.65E-06    | 9.680590467 |
| FAM160B2              | NM_022749    | 49.63191953 | 5.641578519 | 0.0006497   | 8.797523488 |
| BLCAP                 | NM_006698    | 129.1016741 | 3.24409194  | 2.19E-13    | 39.79593564 |
| EIF3J-AS1             | NR_034170    | 180.7953682 | 16.03842053 | 2.11E-12    | 11.27264171 |
| KDEL2                 | NM_006854    | 169.1016741 | 5.526950225 | 1.09E-15    | 30.59583806 |
| PLCXD2                | NM_153268    | 129.6319195 | 1.509357938 | 1.25E-12    | 85.88547243 |
| TAF6L                 | NM_006473    | 86.24453119 | 10.52883039 | 4.74E-06    | 8.191273677 |
| C1orf210              | NM_001164829 | 52.48906239 | 1.56259664  | 5.91E-06    | 33.59092234 |
| GOT2                  | NM_002080    | 153.8146761 | 1.620057805 | 2.58E-18    | 94.94394311 |
| RAB1A                 | NM_004161    | 60.53024548 | 2.663011852 | 9.51E-06    | 22.72999478 |
| MRRF                  | NM_138777    | 143.9176338 | 1.692975704 | 3.32E-15    | 85.00868236 |
| MKRN2OS               | NM_001195279 | 37.40797988 | 0.536392627 | 6.63E-05    | 69.73992181 |
| PPOX                  | NM_000309    | 61.06049096 | 7.575606361 | 0.000291136 | 8.06014569  |
| TRMT2A                | NM_022727    | 80.79536822 | 13.97160665 | 8.09E-05    | 5.782825859 |
| TRPC1                 | NM_003304    | 66.50965393 | 1.451822842 | 2.46E-06    | 45.81113618 |
| ATPAF2                | NM_145691    | 57.40797988 | 1.422920682 | 4.57E-06    | 40.34517216 |
| MRPS35                | NM_001190864 | 107.0398994 | 0.330138947 | 3.72E-15    | 324.2268158 |
| PMS2L2                | NR_003614    | 152.7541851 | 0.149448518 | 1.87E-25    | 1022.119105 |
| CENPU                 | NR_104593    | 51.69369417 | 0.307512889 | 4.04E-07    | 168.1025285 |

|               |              |             |             |             |             |
|---------------|--------------|-------------|-------------|-------------|-------------|
| EIF4H         | NM_022170    | 120.2651227 | 2.308603545 | 1.94E-13    | 52.09431607 |
| TMEM194A      | NM_015257    | 78.73359358 | 1.44760248  | 6.68E-09    | 54.38896013 |
| CHMP1B        | NM_020412    | 108.1003904 | 8.485906826 | 1.60E-08    | 12.7388142  |
| ANGEL2        | NM_144567    | 78.46847084 | 3.0417986   | 7.34E-08    | 25.79673449 |
| GCFC2         | NM_003203    | 148.1003904 | 0.930250656 | 1.72E-17    | 159.2048222 |
| ADH5          | NM_000671    | 120.7953682 | 2.247546024 | 7.14E-13    | 53.74544812 |
| UBE2C         | NM_001281742 | 70.69241049 | 8.841678558 | 6.81E-05    | 7.995360839 |
| PGAM5         | NM_001170543 | 75.08108251 | 5.940138196 | 5.94E-06    | 12.63961882 |
| RAI14         | NM_001145522 | 100.7953682 | 0.17309291  | 5.34E-13    | 582.3194508 |
| KANSL1L       | NM_152519    | 60.79536822 | 0.926511999 | 9.81E-07    | 65.61746454 |
| PDCD6IP       | NM_001162429 | 192.4890624 | 0.21751957  | 6.11E-29    | 884.9275585 |
| ARFGAP3       | NM_014570    | 89.63191953 | 2.613679396 | 1.14E-08    | 34.29338719 |
| LAMC2         | NM_018891    | 61.3256137  | 1.554241444 | 7.56E-06    | 39.45694149 |
| STAT3         | NM_139276    | 106.5096539 | 0.708834257 | 7.03E-13    | 150.2603082 |
| LUC7L2        | NM_001270643 | 87.30502215 | 1.643596958 | 6.67E-09    | 53.11826706 |
| MPZL2         | NM_144765    | 67.57014489 | 4.100988984 | 1.25E-06    | 16.47654874 |
| TOM1L1        | NM_005486    | 116.4066962 | 3.438365978 | 1.47E-11    | 33.85523732 |
| ZNF385A       | NM_001130968 | 49.36679679 | 7.619442635 | 0.002981989 | 6.479056167 |
| ARMC8         | NM_001267042 | 107.3050222 | 1.582881563 | 9.28E-11    | 67.79093562 |
| GSN           | NM_001127666 | 135.0810825 | 4.622655461 | 4.22E-12    | 29.22153374 |
| ZNF791        | NM_153358    | 106.5096539 | 2.504973858 | 9.57E-11    | 42.51926765 |
| LOC101927021  | NR_110068    | 153.0193079 | 1.902396836 | 3.22E-19    | 80.43500965 |
| BCS1L         | NM_001257342 | 95.08108251 | 18.03765537 | 7.10E-05    | 5.27125508  |
| ERCC1         | NM_001983    | 124.1827566 | 11.21523915 | 6.46E-09    | 11.07268021 |
| ESRP1         | NM_001034915 | 50.69241049 | 1.922579427 | 7.89E-05    | 26.36687451 |
| TSC22D4       | NM_030935    | 144.1827566 | 6.214627328 | 1.47E-13    | 23.20054751 |
| LCMT1         | NM_016309    | 67.83526763 | 2.062940513 | 1.35E-06    | 32.88280356 |
| EIF4E2        | NM_004846    | 183.3873883 | 4.412666078 | 2.96E-18    | 41.55931699 |
| C10orf32-ASMT | NR_037644    | 102.1209819 | 0.915808085 | 1.57E-11    | 111.5091509 |
| ARG2          | NM_001172    | 54.07979883 | 3.924603336 | 0.000217217 | 13.77968528 |
| MCCC1         | NR_120640    | 35.34620525 | 0.333913471 | 0.000302387 | 105.8543855 |
| TYRO3         | NM_006293    | 57.67310262 | 4.713888906 | 9.73E-05    | 12.23471825 |
| KRR1          | NM_007043    | 54.34492157 | 1.091289084 | 3.08E-06    | 49.79883184 |
| AKR1A1        | NM_006066    | 99.5289618  | 5.897179103 | 2.40E-08    | 16.87738494 |
| DHDDS         | NM_024887    | 89.89704227 | 2.643865424 | 6.48E-09    | 34.00212487 |
| LRRFIP1       | NM_001137552 | 86.24453119 | 2.521889208 | 2.69E-08    | 34.19838228 |
| MTF2          | NM_001164393 | 78.46847084 | 2.144834304 | 1.55E-07    | 36.58486378 |
| GDPGP1        | NM_001013657 | 146.5096539 | 2.91413244  | 9.68E-17    | 50.27556467 |
| THYN1         | NM_014174    | 38.99871632 | 4.656193579 | 0.001941519 | 8.375664728 |
| NDUFAB1       | NM_005003    | 124.1827566 | 4.441519926 | 2.01E-11    | 27.95951805 |
| TMEM169       | NM_001142311 | 64.4478793  | 2.184763988 | 7.87E-07    | 29.49878323 |
| SSR4          | NM_001204527 | 74.81595977 | 7.988048938 | 2.77E-05    | 9.365986656 |
| ASCC1         | NM_001198800 | 113.5495533 | 1.39686372  | 2.10E-11    | 81.2889273  |
| BCLAF1        | NM_001301038 | 110.6924105 | 3.442182566 | 2.08E-10    | 32.15762336 |
| ANXA6         | NM_001155    | 121.3256137 | 2.214381611 | 2.85E-12    | 54.78983979 |
| CD58          | NR_026665    | 113.5495533 | 1.875081133 | 8.30E-12    | 60.55714142 |
| ARMCX5        | NM_001168485 | 57.93822536 | 2.651597245 | 5.52E-06    | 21.85031134 |
| TMX1          | NM_030755    | 146.2445312 | 1.145235079 | 3.22E-19    | 127.6982638 |
| RPL28         | NM_001136136 | 161.5907364 | 33.35229225 | 2.58E-06    | 4.844966434 |
| HSCB          | NM_172002    | 123.9176338 | 5.043513082 | 2.99E-11    | 24.56970603 |
| NFKBID        | NM_139239    | 193.2844306 | 9.062132127 | 4.28E-17    | 21.32880297 |
| HNRNPU        | NM_004501    | 144.713002  | 8.057258364 | 1.81E-12    | 17.9605761  |
| ST13          | NM_001278589 | 38.73359358 | 2.488574852 | 0.000975331 | 15.56456843 |
| C1orf174      | NM_207356    | 95.08108251 | 0.374133026 | 2.55E-14    | 254.1371005 |
| CCT6P1        | NR_003110    | 100.2651227 | 5.563927721 | 9.07E-09    | 18.02056529 |
| FAM217B       | NM_001190827 | 201.060491  | 5.295935894 | 1.72E-20    | 37.96505377 |
| PDCD2         | NM_001199461 | 135.611328  | 10.46918556 | 3.75E-10    | 12.95337896 |
| DAPK1         | NM_001288730 | 76.67181894 | 0.051685808 | 3.25E-11    | 1483.421127 |
| IFIT5         | NM_012420    | 73.01930787 | 8.539613893 | 1.69E-05    | 8.550656831 |
| HERPUD1       | NM_001010989 | 184.1827566 | 3.194903436 | 1.75E-20    | 57.64892751 |
| HINFP         | NM_198971    | 77.93822536 | 2.174637472 | 1.13E-08    | 35.83964057 |
| ODF2          | NM_002540    | 66.77477667 | 2.038093588 | 1.95E-06    | 32.76335153 |
| H2AFV         | NM_012412    | 128.6306359 | 0.334511714 | 7.74E-20    | 384.5325307 |
| LOC493754     | NR_111973    | 112.4890624 | 2.968024592 | 4.86E-11    | 37.90031345 |

|           |              |             |             |             |             |
|-----------|--------------|-------------|-------------|-------------|-------------|
| RNF14     | NM_004290    | 63.91763382 | 5.772896028 | 3.09E-05    | 11.07202234 |
| TFRC      | NM_003234    | 141.5907364 | 5.009167075 | 1.76E-13    | 28.26632339 |
| FBXL2     | NM_012157    | 78.99871632 | 0.244263131 | 2.34E-10    | 323.4164567 |
| CSTB      | NM_000100    | 180.5302455 | 15.78483199 | 1.15E-12    | 11.43694438 |
| INTS8     | NR_073445    | 128.6306359 | 2.663742047 | 4.75E-13    | 48.28944905 |
| TOR3A     | NM_022371    | 101.8558592 | 6.075057285 | 6.77E-09    | 16.76623847 |
| EMID1     | NM_001267895 | 57.93822536 | 1.891463779 | 1.75E-05    | 30.63142208 |
| CAPN2     | NM_001748    | 78.2033481  | 6.258061867 | 2.24E-06    | 12.49641659 |
| C16orf13  | NR_109976    | 88.57142857 | 5.006899614 | 1.70E-07    | 17.68987505 |
| SCAMP3    | NM_052837    | 75.34620525 | 6.098567114 | 2.18E-06    | 12.35473905 |
| ATL2      | NR_024191    | 123.1222656 | 0.907804448 | 3.16E-13    | 135.6264181 |
| COA1      | NM_018224    | 107.0398994 | 1.364216719 | 1.07E-10    | 78.46253306 |
| SRP72     | NM_001267722 | 59.26383906 | 2.086133905 | 6.76E-06    | 28.408454   |
| COX18     | NM_001297733 | 163.6525111 | 3.222142827 | 4.53E-18    | 50.78996179 |
| FAM13B    | NM_001101801 | 183.3873883 | 1.847190222 | 6.44E-19    | 99.27910304 |
| ANLN      | NM_001284301 | 115.3462052 | 0.356551168 | 1.47E-15    | 323.5053351 |
| DYNLRB1   | NM_001281728 | 144.4478793 | 2.93070445  | 5.28E-15    | 49.28776741 |
| SNX9      | NM_016224    | 85.97940845 | 0.545723793 | 4.07E-10    | 157.551145  |
| SDF2      | NM_006923    | 103.9176338 | 3.311192696 | 1.89E-10    | 31.383747   |
| RMDN1     | NM_016033    | 152.4890624 | 2.794363289 | 3.42E-16    | 54.57023536 |
| ETV3      | NM_001145312 | 101.3256137 | 1.645944931 | 3.11E-12    | 61.56075565 |
| SLC25A38  | NM_017875    | 110.4272878 | 8.910137899 | 9.61E-09    | 12.39344318 |
| PSME4     | NM_014614    | 69.10167405 | 0.655211496 | 5.32E-08    | 105.464685  |
| OR51B5    | NM_001005567 | 121.3256137 | 7.631473804 | 1.88E-09    | 15.89805807 |
| TRIM21    | NM_003141    | 92.75418513 | 1.636442412 | 1.00E-10    | 56.6803845  |
| LFNG      | NM_001040168 | 45.71428571 | 6.839107877 | 0.00370824  | 6.684246913 |
| DDX39A    | NR_046366    | 89.89704227 | 11.46312312 | 6.95E-06    | 7.842281839 |
| TBCCD1    | NM_018138    | 187.3050222 | 1.614257196 | 1.12E-22    | 116.0317096 |
| REEP1     | NM_001164731 | 65.97940845 | 0.056360844 | 5.49E-10    | 1170.660397 |
| ZAK       | NM_016653    | 62.38610466 | 0.463087251 | 3.28E-07    | 134.7178194 |
| BLOC1S2   | NM_001282439 | 192.4890624 | 4.596696047 | 3.91E-20    | 41.87552547 |
| ZNF823    | NM_001080493 | 98.73359358 | 0.062750917 | 7.35E-17    | 1573.420724 |
| AFMID     | NR_027083    | 127.8352676 | 9.507982424 | 4.42E-10    | 13.44504669 |
| SGMS1     | NM_147156    | 74.07979883 | 0.530255114 | 3.03E-08    | 139.7059584 |
| DAP       | NM_001291963 | 97.93822536 | 2.166770882 | 1.58E-09    | 45.20008377 |
| PPP2R5E   | NM_006246    | 72.75418513 | 0.71669526  | 4.70E-08    | 101.5134175 |
| EPB41     | NM_203343    | 109.8970423 | 0.369218045 | 1.27E-12    | 297.6480802 |
| PSMC2     | NM_001204453 | 69.63191953 | 3.172504203 | 2.69E-06    | 21.94856652 |
| ZNF410    | NM_001242928 | 96.67181894 | 1.101403032 | 1.33E-10    | 87.7715206  |
| PLEKHH1   | NM_020715    | 81.06049096 | 2.178543995 | 7.23E-08    | 37.20856276 |
| PRKCD     | NM_006254    | 40.53024548 | 0.519066767 | 2.98E-05    | 78.08291359 |
| ATP2B4    | NM_001001396 | 89.63191953 | 0.879187922 | 4.20E-10    | 101.9485338 |
| ENAH      | NM_018212    | 80.79536822 | 1.005242733 | 7.09E-09    | 80.37398889 |
| MINOS1    | NR_033758    | 95.34620525 | 0.931769053 | 6.23E-11    | 102.328152  |
| GTSE1-AS1 | NR_024009    | 95.61132799 | 15.79871078 | 0.000102192 | 6.051843681 |
| CAD       | NM_004341    | 138.7335936 | 3.769314076 | 8.57E-14    | 36.80605828 |
| HIBADH    | NM_152740    | 143.9176338 | 0.46763177  | 2.36E-17    | 307.7584608 |
| LAMA5     | NM_005560    | 100.7953682 | 3.907009872 | 9.13E-09    | 25.79859574 |
| IPO8      | NM_006390    | 50.16216501 | 0.695615602 | 3.69E-06    | 72.11190328 |
| SRXN1     | NM_080725    | 83.65251108 | 7.230689208 | 1.72E-06    | 11.56909233 |
| NSA2      | NM_001271665 | 99.26383906 | 6.671500149 | 7.88E-09    | 14.8787884  |
| AGPAT2    | NM_006412    | 195.3462052 | 4.065433183 | 1.20E-20    | 48.05052659 |
| CCP110    | NM_001199022 | 55.34620525 | 0.464635855 | 2.11E-07    | 119.117379  |
| HEATR3    | NM_182922    | 98.46847084 | 0.222112662 | 8.81E-15    | 443.3266881 |
| RNF216P1  | NR_023385    | 121.5907364 | 0.680392925 | 2.67E-16    | 178.7066443 |
| TPT1-AS1  | NR_024458    | 49.89704227 | 3.903062217 | 0.000178833 | 12.78407555 |
| PDHX      | NM_003477    | 106.7747767 | 0.598476937 | 5.02E-13    | 178.410846  |
| RNF122    | NM_024787    | 104.1827566 | 3.074419733 | 4.21E-10    | 33.88696587 |
| LRIG2     | NM_014813    | 144.1827566 | 1.857182985 | 2.87E-15    | 77.63519143 |
| ZBTB8OS   | NM_178547    | 81.3256137  | 0.7850826   | 2.11E-09    | 103.588608  |
| ZDHHC21   | NM_178566    | 43.91763382 | 0.276653596 | 1.97E-05    | 158.7459349 |
| LRPPRC    | NM_133259    | 68.63063585 | 2.140461029 | 1.86E-06    | 32.06348301 |
| ARPC5     | NM_005717    | 83.65251108 | 4.28614597  | 4.12E-08    | 19.51695338 |
| TMCO4     | NM_181719    | 97.93822536 | 0.142990369 | 1.37E-13    | 684.9288235 |

|              |              |             |             |             |             |
|--------------|--------------|-------------|-------------|-------------|-------------|
| C12orf65     | NM_001194995 | 84.18275656 | 3.031758313 | 1.67E-08    | 27.76697476 |
| BFSP1        | NM_001161705 | 50.42728775 | 1.833037325 | 7.65E-05    | 27.5102351  |
| LOC100288181 | NR_038925    | 124.9781248 | 6.7030287   | 9.45E-11    | 18.64502307 |
| WDR55        | NM_017706    | 190.162165  | 6.31321603  | 6.63E-19    | 30.12128273 |
| POLR3C       | NM_006468    | 113.0193079 | 0.91528428  | 5.59E-15    | 123.4800054 |
| DTNBP1       | NM_001271669 | 120.7953682 | 0.89915795  | 1.46E-13    | 134.3427684 |
| DNTTIP1      | NM_052951    | 132.4890624 | 2.958045871 | 1.21E-13    | 44.78938738 |
| NEIL1        | NR_046311    | 61.59073644 | 4.453146172 | 3.60E-05    | 13.83083646 |
| PAX2         | NM_003989    | 38.46847084 | 2.217788724 | 0.002350776 | 17.34541727 |
| SUMF2        | NM_001042469 | 135.611328  | 3.097755548 | 3.01E-14    | 43.77728516 |
| ZDHHC7       | NM_001145548 | 135.0810825 | 2.741927802 | 3.63E-14    | 49.2650034  |
| BCL7C        | NM_004765    | 67.03989941 | 9.806134842 | 0.00015137  | 6.836526368 |
| RRM1         | NM_001033    | 60.53024548 | 1.537478531 | 6.04E-06    | 39.36981511 |
| KCTD20       | NM_001286580 | 95.08108251 | 2.697513898 | 2.16E-09    | 35.24767104 |
| ITGA1        | NM_181501    | 28.10039037 | 0.39878016  | 0.002181038 | 70.46586865 |
| ANAPC13      | NM_015391    | 76.14157347 | 2.233768749 | 2.65E-08    | 34.08659625 |
| SEC23IP      | NR_037771    | 172.7541851 | 2.245966102 | 2.60E-18    | 76.91753894 |
| ZC3H14       | NM_001160103 | 155.0810825 | 1.946162756 | 1.38E-16    | 79.68556692 |
| SBK1         | NM_001024401 | 60          | 2.929105787 | 8.01E-06    | 20.48406728 |
| CCDC82       | NM_024725    | 72.22393965 | 0.357853611 | 4.42E-10    | 201.8253762 |
| FLJ31306     | NR_029435    | 84.71300204 | 2.313262705 | 8.18E-09    | 36.62057139 |
| RCOR3        | NM_001136223 | 120.5302455 | 1.715774623 | 1.50E-12    | 70.24829711 |
| CHCHD7       | NM_024300    | 162.1209819 | 4.102732331 | 1.11E-17    | 39.51536899 |
| PANK1        | NM_148977    | 69.89704227 | 2.462888884 | 1.52E-06    | 28.38010383 |
| RGS9BP       | NM_207391    | 92.75418513 | 1.324080016 | 2.50E-11    | 70.05179747 |
| SNHG12       | NR_024127    | 219.2638391 | 28.24127426 | 5.81E-13    | 7.763949922 |
| HMGCR        | NM_001130996 | 58.2033481  | 1.785052926 | 7.91E-06    | 32.60595092 |
| VDR          | NM_000376    | 229.6319195 | 2.565774824 | 2.51E-24    | 89.49807964 |
| GOSR1        | NM_004871    | 75.08108251 | 0.754409445 | 3.21E-09    | 99.5229885  |
| PTDSS2       | NM_030783    | 69.63191953 | 0.539500696 | 5.36E-09    | 129.0673397 |
| PPP2R4       | NM_001271832 | 132.2239396 | 4.892141146 | 3.80E-12    | 27.027826   |
| CST6         | NM_001323    | 71.95881691 | 10.57260019 | 0.000720794 | 6.806160794 |
| VWA1         | NM_199121    | 100.2651227 | 13.87724492 | 1.59E-06    | 7.22514615  |
| ERCC5        | NM_000123    | 85.97940845 | 0.666776896 | 2.41E-10    | 128.947792  |
| SRPX         | NM_001170750 | 54.81595977 | 0.31964899  | 5.75E-07    | 171.4879805 |
| BLOC1S4      | NM_018366    | 118.4684708 | 12.73562986 | 5.13E-07    | 9.302128918 |
| NOTCH2       | NM_024408    | 213.8146761 | 2.457613428 | 3.33E-21    | 87.00093907 |
| GAMT         | NM_000156    | 167.0398994 | 16.92883045 | 2.41E-11    | 9.867184856 |
| MAX          | NM_001271069 | 43.65251108 | 2.498326349 | 0.000685268 | 17.47270171 |
| ATP5SL       | NM_001167869 | 102.6512274 | 11.03798722 | 1.98E-07    | 9.29981394  |
| RPL31        | NM_000993    | 167.5701449 | 17.26171758 | 8.65E-12    | 9.707617109 |
| ELL2         | NM_012081    | 72.48906239 | 2.284524927 | 8.04E-07    | 31.73047557 |
| SPRYD3       | NM_032840    | 71.42857143 | 5.520363089 | 2.86E-06    | 12.9391075  |
| FOSL1        | NM_001300856 | 75.87645073 | 16.6236841  | 0.000664304 | 4.564358314 |
| MED9         | NM_018019    | 58.46847084 | 2.459358602 | 6.75E-06    | 23.77386966 |
| C17orf89     | NM_001086521 | 70.42728775 | 10.27892503 | 0.000167009 | 6.851619946 |
| UBTF         | NR_045058    | 78.46847084 | 14.39943164 | 0.000340078 | 5.449414451 |
| FBXW11       | NM_012300    | 82.12098192 | 0.696334531 | 1.88E-09    | 117.9332322 |
| C11orf63     | NM_024806    | 32.75418513 | 0.577947247 | 0.000885111 | 56.67331279 |
| PTPN2        | NM_080423    | 166.2445312 | 0.94193618  | 4.64E-18    | 176.4923514 |
| IFT88        | NM_006531    | 98.46847084 | 0.35033261  | 4.68E-12    | 281.0713819 |
| STOM         | NR_073037    | 81.3256137  | 0.684478401 | 1.82E-09    | 118.8139956 |
| SEC24C       | NM_198597    | 74.81595977 | 3.608846797 | 1.75E-06    | 20.73126513 |
| PSMA7        | NM_002792    | 103.1222656 | 10.23729648 | 1.02E-07    | 10.07319323 |
| CARS2        | NM_024537    | 129.6319195 | 2.701166337 | 6.34E-13    | 47.99109102 |
| REL          | NM_002908    | 91.69369417 | 1.057895929 | 6.53E-10    | 86.6755336  |
| NGFRAP1      | NM_206917    | 68.83655131 | 9.867818603 | 0.000271106 | 6.975863064 |
| SVIL         | NM_003174    | 49.63191953 | 1.28494181  | 2.28E-05    | 38.62581103 |
| CAMK2G       | NM_172171    | 148.8365513 | 2.906869101 | 4.52E-15    | 51.2016696  |
| NUF2         | NM_145697    | 55.34620525 | 0.317371965 | 1.23E-07    | 174.3890807 |
| RPS23        | NM_001025    | 90.16216501 | 17.97688245 | 7.42E-05    | 5.015450551 |
| PSMD7        | NM_002811    | 83.91763382 | 8.281777754 | 3.82E-06    | 10.13280437 |
| HIBCH        | NM_014362    | 61.59073644 | 0.637130517 | 2.66E-07    | 96.66894736 |
| NHLRC3       | NM_001012754 | 44.71300204 | 2.662580257 | 0.000117365 | 16.79310959 |

|            |              |             |             |             |             |
|------------|--------------|-------------|-------------|-------------|-------------|
| ADAMTS7    | NM_014272    | 80.79536822 | 2.724547194 | 8.41E-08    | 29.65460404 |
| ALDH6A1    | NM_001278594 | 73.28443061 | 2.53894754  | 1.43E-07    | 28.864098   |
| PEX11B     | NR_073493    | 40.79536822 | 2.257221924 | 0.000256401 | 18.07326421 |
| COPA       | NM_004371    | 113.0193079 | 1.887664111 | 7.94E-12    | 59.87257331 |
| KIF22      | NM_001256269 | 78.73359358 | 5.154042892 | 2.91E-07    | 15.27608427 |
| CASS4      | NM_001164115 | 21.3256137  | 0.016640398 | 0.002143505 | 1281.556698 |
| PPAP2C     | NM_177526    | 88.57142857 | 4.991858485 | 9.09E-08    | 17.74317698 |
| CCDC6      | NM_005436    | 95.61132799 | 0.826016592 | 8.16E-11    | 115.749888  |
| CASZ1      | NM_017766    | 41.59073644 | 0.474495472 | 5.44E-05    | 87.65254648 |
| XPO6       | NM_001270940 | 97.67310262 | 2.159021698 | 2.21E-09    | 45.23951876 |
| GIT2       | NM_057170    | 126.2445312 | 2.036858493 | 7.60E-13    | 61.98002052 |
| ZMYM3      | NM_005096    | 48.83655131 | 1.587238632 | 3.64E-05    | 30.76824765 |
| LINC00674  | NR_027418    | 84.71300204 | 0.176248815 | 1.44E-13    | 480.6443779 |
| COL6A2     | NM_001849    | 101.8558592 | 0.385481969 | 5.40E-15    | 264.2298924 |
| ADAL       | NM_001159280 | 53.81467609 | 1.136767833 | 8.79E-06    | 47.34007644 |
| BAD        | NM_032989    | 84.4478793  | 9.158646004 | 3.88E-06    | 9.220563745 |
| ITCH       | NM_001257137 | 98.46847084 | 1.812381066 | 2.39E-09    | 54.33099733 |
| SRSF4      | NM_005626    | 79.26383906 | 4.406056678 | 6.74E-07    | 17.98974567 |
| GPATCH2L   | NM_017926    | 143.3873883 | 2.660496523 | 1.46E-14    | 53.89497302 |
| TCOF1      | NM_001135244 | 61.85585918 | 2.96962204  | 5.07E-06    | 20.82953937 |
| TMEM87A    | NM_001286487 | 73.28443061 | 0.634411785 | 3.84E-09    | 115.5155568 |
| EIF3J      | NM_001284336 | 151.6936942 | 3.835214823 | 4.03E-15    | 39.55285457 |
| WDR60      | NM_018051    | 89.63191953 | 0.033470281 | 4.60E-15    | 2677.955397 |
| LIN54      | NM_001115008 | 37.40797988 | 0.147177751 | 5.68E-05    | 254.1687159 |
| SORD       | NR_034039    | 186.7747767 | 1.985574684 | 2.86E-20    | 94.06585318 |
| POLR2G     | NM_002696    | 152.2239396 | 3.831233192 | 3.68E-16    | 39.73236084 |
| SOCS4      | NM_080867    | 120.7953682 | 1.975311139 | 9.99E-14    | 61.15257787 |
| PPP3R1     | NM_000945    | 120.2651227 | 1.971663124 | 3.83E-12    | 60.99679063 |
| GLUL       | NM_002065    | 77.40797988 | 12.84680305 | 8.44E-05    | 6.025466383 |
| EXTL2      | NM_001261442 | 79.26383906 | 1.847394781 | 1.21E-08    | 42.9057394  |
| DNAJC1     | NM_022365    | 103.9176338 | 0.129535143 | 2.75E-13    | 802.2350649 |
| SMARCB1    | NM_003073    | 122.1209819 | 2.116733143 | 7.55E-13    | 57.69314017 |
| LNP1       | NM_001085451 | 70.69241049 | 0.449819554 | 2.97E-09    | 157.1572642 |
| LINC01271  | NR_109950    | 83.91763382 | 5.439678901 | 5.08E-07    | 15.42694621 |
| DNAAF1     | NM_178452    | 52.22393965 | 1.725660211 | 4.63E-05    | 30.26316498 |
| VPS36      | NM_001282168 | 117.9382254 | 1.054868368 | 1.59E-13    | 111.8037368 |
| MVK        | NM_000431    | 43.91763382 | 2.528833952 | 0.000418366 | 17.36675268 |
| LGALS3     | NM_001177388 | 195.3462052 | 3.136369074 | 4.61E-21    | 62.28418933 |
| LSM5       | NM_001139499 | 135.3462052 | 6.956828252 | 6.15E-12    | 19.45515979 |
| TRAPPC10   | NM_003274    | 32.22393965 | 0.673495707 | 0.001027433 | 47.84579812 |
| DQX1       | NM_133637    | 37.67310262 | 1.300283502 | 0.000366321 | 28.97299134 |
| THAP3      | NM_138350    | 83.91763382 | 8.532518189 | 4.53E-06    | 9.835037202 |
| THOC7      | NM_001285404 | 35.34620525 | 1.980060845 | 0.003347353 | 17.85107025 |
| SLC25A32   | NR_102338    | 127.8352676 | 5.680067823 | 1.22E-11    | 22.50594035 |
| CASP2      | NM_032982    | 57.93822536 | 3.450159908 | 7.43E-05    | 16.79291016 |
| SMC1A      | NM_006306    | 44.18275656 | 1.130719698 | 0.000400723 | 39.07489772 |
| DUSP14     | NM_007026    | 37.40797988 | 1.922209806 | 0.001477526 | 19.46092449 |
| ERICH6-AS1 | NR_121674    | 44.18275656 | 0.041666405 | 1.30E-07    | 1060.392811 |
| HGSNAT     | NM_152419    | 92.75418513 | 0.626516699 | 1.97E-11    | 148.0474268 |
| IQCB1      | NM_001023570 | 172.4890624 | 0.330370519 | 1.56E-24    | 522.1079132 |
| RAB37      | NM_001006638 | 93.81467609 | 4.83456904  | 1.68E-08    | 19.40497184 |
| EPS8L2     | NM_022772    | 73.01930787 | 7.489525243 | 1.33E-05    | 9.749524236 |
| COG4       | NM_001195139 | 93.28443061 | 0.607785744 | 2.00E-12    | 153.4824263 |
| ATP2A3     | NM_174955    | 145.7142857 | 2.759135159 | 2.30E-15    | 52.81157947 |
| HNRNPH3    | NM_012207    | 156.1415735 | 5.306750872 | 6.00E-15    | 29.42319646 |
| SNX12      | NM_001256188 | 45.71428571 | 1.534700651 | 4.07E-05    | 29.78710257 |
| DGUOK-AS1  | NR_104029    | 94.61004431 | 3.703645296 | 9.71E-09    | 25.54511481 |
| PNPO       | NM_018129    | 189.8970423 | 10.19240022 | 1.75E-16    | 18.63123877 |
| POLR1B     | NM_001282776 | 122.1209819 | 4.298576044 | 2.10E-11    | 28.40963628 |
| PTRHD1     | NM_001013663 | 92.48906239 | 16.62682462 | 8.03E-05    | 5.562641363 |
| DCBLD1     | NM_173674    | 161.060491  | 1.275880496 | 4.80E-17    | 126.2347778 |
| ZC3HAV1    | NM_020119    | 141.5907364 | 1.443433917 | 2.87E-15    | 98.09298147 |
| PRDX5      | NM_012094    | 104.1827566 | 8.229541809 | 3.92E-08    | 12.65960596 |
| TRIM9      | NM_052978    | 69.89704227 | 1.183614844 | 9.62E-08    | 59.05387435 |

|           |              |             |             |             |             |
|-----------|--------------|-------------|-------------|-------------|-------------|
| CPM       | NM_001005502 | 92.22393965 | 0.515674795 | 2.46E-11    | 178.8412787 |
| SFPQ      | NM_005066    | 170.9575332 | 11.00323662 | 6.61E-14    | 15.53702235 |
| NEK3      | NM_152720    | 36.40669621 | 0.86698879  | 0.000110099 | 41.99211871 |
| ZNF169    | NM_003448    | 76.93694168 | 1.277075522 | 4.58E-08    | 60.24462953 |
| IQSEC1    | NM_014869    | 69.89704227 | 0.063284048 | 3.59E-11    | 1104.497026 |
| VRK1      | NM_003384    | 67.03989941 | 0.363378816 | 2.97E-08    | 184.4903899 |
| LEPREL4   | NM_006455    | 87.03989941 | 8.468524838 | 2.27E-06    | 10.27804737 |
| CGNL1     | NM_032866    | 71.69369417 | 0.52612586  | 3.49E-08    | 136.2671932 |
| UHMK1     | NM_175866    | 121.3256137 | 2.517888685 | 8.27E-13    | 48.18545571 |
| PKD1L2    | NM_001278425 | 41.06049096 | 0.440785229 | 7.11E-05    | 93.15305557 |
| LDHB      | NM_001174097 | 146.7747767 | 5.496989258 | 3.37E-13    | 26.70093933 |
| AUH       | NM_001698    | 78.73359358 | 0.577317093 | 3.13E-09    | 136.3784209 |
| PTGR2     | NM_001146154 | 130.162165  | 2.602003719 | 4.86E-14    | 50.02381974 |
| MMGT1     | NM_173470    | 60          | 1.411875517 | 5.67E-07    | 42.49666439 |
| YBX3      | NM_001145426 | 134.8159598 | 2.89290166  | 1.15E-13    | 46.60233067 |
| ATP10D    | NM_020453    | 70.69241049 | 0.071626994 | 9.44E-11    | 986.9520773 |
| UBA2      | NM_005499    | 121.8558592 | 3.424692549 | 1.86E-11    | 35.58154709 |
| NCAPG2    | NR_104054    | 109.8970423 | 0.688832876 | 2.64E-13    | 159.5409367 |
| E2F7      | NM_203394    | 180.7953682 | 2.728298727 | 2.98E-19    | 66.26670549 |
| GYS1      | NR_027763    | 101.3256137 | 5.557159961 | 5.13E-09    | 18.2333448  |
| TOX       | NM_014729    | 29.10167405 | 0.159246113 | 0.001996388 | 182.7465273 |
| RAD51B    | NM_133509    | 51.42857143 | 0.112634412 | 6.52E-06    | 456.597328  |
| SEL1L     | NM_001244984 | 69.36679679 | 1.495557703 | 4.51E-07    | 46.38189261 |
| SAYSD1    | NM_018322    | 131.9588169 | 3.191417066 | 1.06E-13    | 41.3480326  |
| GOSR2     | NM_001012511 | 186.0386157 | 4.189504605 | 1.37E-19    | 44.40587451 |
| CNN2      | NM_004368    | 95.61132799 | 10.77084816 | 2.33E-06    | 8.876861561 |
| FAM73A    | NM_198549    | 81.59073644 | 0.807724815 | 1.29E-09    | 101.0130367 |
| TPM2      | NM_001301227 | 109.6319195 | 11.69957893 | 1.57E-07    | 9.370586773 |
| MPI       | NM_001289155 | 157.9382254 | 14.05842962 | 2.34E-11    | 11.23441448 |
| B4GALNT1  | NM_001276468 | 40.79536822 | 4.285323551 | 0.002380547 | 9.519787183 |
| STOX1     | NM_001130160 | 123.1222656 | 0.941554235 | 1.54E-13    | 130.7649214 |
| PSCA      | NR_033343    | 63.18147288 | 8.417580149 | 0.000121099 | 7.505895015 |
| APLP2     | NM_001642    | 104.713002  | 1.016684734 | 3.73E-11    | 102.9945651 |
| STRN3     | NM_014574    | 117.9382254 | 1.548955784 | 1.42E-11    | 76.14047257 |
| SPIN3     | NR_027139    | 121.3256137 | 1.598438069 | 1.80E-14    | 75.90260519 |
| EPG5      | NM_020964    | 100.2651227 | 0.122248171 | 2.90E-14    | 820.1768718 |
| PGS1      | NR_111989    | 110.6924105 | 2.697348659 | 2.45E-11    | 41.03748698 |
| SLC12A9   | NM_001267814 | 84.18275656 | 2.928451755 | 3.41E-08    | 28.74650621 |
| MAST3     | NM_015016    | 123.6525111 | 3.364546666 | 2.82E-12    | 36.75161124 |
| CITED2    | NM_001168388 | 64.18275656 | 4.398811366 | 3.58E-05    | 14.59093178 |
| BRMS1L    | NM_032352    | 184.1827566 | 2.055704094 | 3.73E-20    | 89.59594775 |
| MRPL10    | NM_145255    | 185.773493  | 4.55131047  | 5.62E-20    | 40.81758303 |
| UGT8      | NM_001128174 | 98.99871632 | 0.515069754 | 1.54E-12    | 192.2044841 |
| GTF2H2C_2 | NM_001042490 | 170.4272878 | 2.38767904  | 3.31E-19    | 71.3778045  |
| TUFT1     | NM_001301317 | 173.0193079 | 0.366983996 | 2.23E-24    | 471.4628151 |
| ZNF780A   | NM_001142577 | 94.81595977 | 0.895133491 | 5.83E-12    | 105.9238212 |
| AGFG2     | NM_006076    | 81.06049096 | 3.037345667 | 4.70E-08    | 26.68793738 |
| LINC00920 | NR_046242    | 57.40797988 | 3.784132553 | 5.40E-05    | 15.17071061 |
| CPSF3     | NM_016207    | 35.08108251 | 2.032125513 | 0.003933777 | 17.26324594 |
| SLC46A3   | NM_181785    | 66.50965393 | 0.88649349  | 1.03E-07    | 75.02554133 |
| GCC2      | NR_028063    | 128.8365513 | 0.735403252 | 7.44E-15    | 175.1917074 |
| HNRNPC    | NM_001077442 | 178.7335936 | 6.835007057 | 1.61E-15    | 26.14973066 |
| CNKSR3    | NM_173515    | 110.4272878 | 1.443124569 | 3.63E-11    | 76.51958129 |
| EIF3CL    | NM_001099661 | 192.0180242 | 11.39000261 | 2.50E-15    | 16.8584706  |
| EFCAB2    | NM_001290327 | 132.2239396 | 0.740554807 | 2.27E-15    | 178.5471358 |
| ATAD3B    | NM_031921    | 106.2445312 | 2.139520438 | 1.26E-11    | 49.65810531 |
| ST3GAL5   | NM_003896    | 26.50965393 | 0.641094077 | 0.003591528 | 41.35064555 |
| YPEL1     | NM_013313    | 63.1222656  | 1.420787776 | 2.23E-06    | 44.42765252 |
| PABPC4    | NM_001135654 | 183.6525111 | 6.34581172  | 7.65E-17    | 28.94074378 |
| FXR1      | NM_001013438 | 103.9176338 | 2.629054314 | 4.06E-10    | 39.52662114 |
| HSPA2     | NM_021979    | 35.34620525 | 2.899092628 | 0.002863889 | 12.19216141 |
| INVS      | NM_183245    | 104.4478793 | 0.538189965 | 4.78E-12    | 194.0725136 |
| GNL2      | NM_013285    | 118.9987163 | 1.165185433 | 3.24E-14    | 102.1285651 |
| CLSPN     | NM_001190481 | 144.9781248 | 2.555322471 | 1.37E-15    | 56.73574527 |



|              |              |             |             |             |             |
|--------------|--------------|-------------|-------------|-------------|-------------|
| LAMTOR5-AS1  | NR_102697    | 87.57014489 | 5.397793929 | 6.76E-08    | 16.22332124 |
| CPTP         | NM_001029885 | 96.14157347 | 10.70481146 | 5.42E-07    | 8.981155232 |
| PRKAB2       | NM_005399    | 67.03989941 | 4.286870018 | 1.03E-05    | 15.63842597 |
| PARP16       | NM_017851    | 72.75418513 | 4.052224246 | 4.00E-06    | 17.95413598 |
| SLU7         | NM_006425    | 72.22393965 | 0.643658956 | 4.41E-09    | 112.208397  |
| RBMX2        | NM_016024    | 57.14285714 | 0.40595152  | 5.53E-08    | 140.762762  |
| GLS          | NM_014905    | 195.0810825 | 2.272747724 | 4.84E-20    | 85.83490392 |
| CYB5D2       | NM_144611    | 58.46847084 | 9.156660038 | 0.001530526 | 6.38534909  |
| SWT1         | NM_001105518 | 45.97940845 | 0.473282522 | 2.38E-05    | 97.15002422 |
| PDHA1        | NM_001173455 | 80.79536822 | 1.662351977 | 4.73E-09    | 48.60304516 |
| ENTPD6       | NM_001114089 | 95.87645073 | 3.178712242 | 6.48E-10    | 30.16204155 |
| BCAS4        | NM_198799    | 51.69369417 | 0.88338685  | 5.66E-06    | 58.5176179  |
| SLC35F5      | NM_025181    | 158.4684708 | 1.145085603 | 2.25E-18    | 138.3900649 |
| NFX1         | NM_002504    | 81.59073644 | 2.048843962 | 4.85E-08    | 39.82281617 |
| ULBP3        | NM_024518    | 121.060491  | 3.083730192 | 2.56E-13    | 39.25780903 |
| SMTN         | NM_006932    | 178.9987163 | 13.15218486 | 4.28E-14    | 13.60980842 |
| TAB3         | NM_152787    | 32.48906239 | 0.251704141 | 0.000438885 | 129.0763919 |
| SMN2         | NM_022876    | 129.9562496 | 14.80811211 | 1.96E-08    | 8.7760174   |
| GNPDA1       | NM_005471    | 80.79536822 | 5.409805448 | 1.35E-06    | 14.93498593 |
| MCOLN3       | NM_001253693 | 84.71300204 | 0.253411997 | 4.15E-13    | 334.2896272 |
| XYLT2        | NR_110010    | 66.24453119 | 5.3939451   | 1.12E-05    | 12.2812765  |
| SAP130       | NM_001145928 | 77.93822536 | 0.886598141 | 5.72E-09    | 87.90704807 |
| CHPT1        | NM_020244    | 83.1222656  | 1.193986779 | 3.85E-09    | 69.61740874 |
| BTN3A3       | NM_006994    | 26.24453119 | 0.440440921 | 0.001095033 | 59.58695019 |
| RAB4B        | NM_016154    | 78.46847084 | 3.458532166 | 4.84E-07    | 22.68837387 |
| TUBGCP5      | NM_052903    | 95.87645073 | 0.955724077 | 5.74E-11    | 100.3181284 |
| PAXBP1       | NM_013329    | 123.6525111 | 0.827057424 | 2.87E-15    | 149.508979  |
| CHST12       | NM_001243795 | 83.38738834 | 1.663916656 | 8.29E-09    | 50.11512328 |
| TFAM         | NR_073073    | 104.4478793 | 4.447721839 | 2.10E-10    | 23.48345582 |
| EIF3H        | NM_003756    | 127.5701449 | 0.689135594 | 3.14E-15    | 185.1161746 |
| LOC101928069 | NR_120586    | 189.8970423 | 17.53500129 | 1.55E-13    | 10.82959956 |
| BZW2         | NM_014038    | 155.3462052 | 0.693732266 | 1.96E-18    | 223.9281821 |
| RRP9         | NM_004704    | 70.16216501 | 1.689287736 | 8.06E-08    | 41.53357864 |
| DDX49        | NM_019070    | 78.46847084 | 5.623921556 | 1.73E-06    | 13.95262542 |
| ATXN10       | NM_001167621 | 128.8365513 | 1.131806447 | 4.02E-14    | 113.8326713 |
| KHDC1        | NM_001251874 | 197.6731026 | 1.883121025 | 4.06E-21    | 104.9710029 |
| RHBDF2       | NM_024599    | 167.8352676 | 7.434298086 | 6.63E-15    | 22.5758055  |
| TMEM56       | NM_152487    | 102.3861047 | 0.530851206 | 7.56E-13    | 192.8715683 |
| MYH10        | NM_005964    | 88.83655131 | 1.160110093 | 8.69E-10    | 76.57596624 |
| MLEC         | NM_014730    | 121.060491  | 2.606416586 | 6.40E-13    | 46.44709967 |
| AASDH        | NM_001286671 | 136.6718189 | 0.911674896 | 5.93E-16    | 149.9128906 |
| INO80B       | NM_031288    | 132.2239396 | 21.81499145 | 3.93E-07    | 6.061150195 |
| LCLAT1       | NM_001002257 | 53.01930787 | 0.275882719 | 1.99E-06    | 192.1806054 |
| POLR3K       | NM_016310    | 74.55083703 | 2.872304984 | 6.55E-08    | 25.95505611 |
| WASF2        | NM_001201404 | 98.46847084 | 1.443511461 | 9.66E-10    | 68.21454036 |
| CES2         | NM_198061    | 113.0193079 | 6.325986184 | 1.84E-10    | 17.86587965 |
| STK40        | NM_032017    | 111.9588169 | 4.385960939 | 5.45E-10    | 25.52663338 |
| MGAT1        | NM_002406    | 97.93822536 | 4.574987584 | 1.21E-08    | 21.40732047 |
| PACS1        | NM_018026    | 61.06049096 | 0.600925134 | 8.05E-07    | 101.6108122 |
| FMNL3        | NM_198900    | 34.81595977 | 0.514445426 | 0.000361579 | 67.67668245 |
| LYPLA1       | NM_001279356 | 83.38738834 | 1.809013919 | 2.74E-08    | 46.09549295 |
| ARHGAP17     | NM_001006634 | 51.69369417 | 0.667407188 | 5.13E-06    | 77.45450621 |
| GRINA        | NM_000837    | 123.1222656 | 8.599672444 | 4.24E-10    | 14.31708782 |
| SLC25A19     | NM_021734    | 201.3256137 | 3.751147367 | 3.52E-21    | 53.67040908 |
| LOC439933    | NR_122079    | 46.50965393 | 2.001459176 | 0.000207574 | 23.23787289 |
| DNAJC7       | NM_003315    | 138.7335936 | 2.54524072  | 8.62E-15    | 54.50706193 |
| KLHL22       | NR_033825    | 63.65251108 | 2.635600519 | 5.47E-06    | 24.15104664 |
| ACTR2        | NM_001005386 | 55.87645073 | 0.85608771  | 5.37E-07    | 65.26953966 |
| ZNF250       | NM_021061    | 130.4272878 | 2.231490732 | 7.84E-15    | 58.44850075 |
| GLT8D1       | NM_001278281 | 106.2445312 | 9.584044224 | 3.01E-08    | 11.08556354 |
| MTFR1L       | NM_001099625 | 137.6731026 | 6.491991996 | 6.14E-12    | 21.20660387 |
| DTX2         | NM_001102594 | 138.7335936 | 2.682309727 | 1.29E-14    | 51.72169051 |
| DHRS1        | NM_138452    | 43.38738834 | 3.975982494 | 0.001373531 | 10.91236906 |
| UBE2W        | NR_073121    | 135.3462052 | 1.935452241 | 1.60E-13    | 69.9300155  |

|              |              |             |             |             |             |
|--------------|--------------|-------------|-------------|-------------|-------------|
| PHF6         | NM_032335    | 68.83655131 | 1.674596933 | 6.90E-07    | 41.10634025 |
| ATP1B3       | NM_001679    | 169.6319195 | 2.049818208 | 3.21E-18    | 82.75461644 |
| ULK4P3       | NR_026859    | 54.55083703 | 2.870353717 | 3.01E-05    | 19.004918   |
| LMBR1L       | NM_001300750 | 71.22265597 | 3.915507624 | 1.59E-06    | 18.18989077 |
| MYO6         | NM_001300899 | 149.6319195 | 0.589747509 | 3.04E-17    | 253.7220033 |
| ZNF24        | NM_006965    | 78.46847084 | 1.572205038 | 3.41E-09    | 49.90982026 |
| L3HYPDH      | NM_144581    | 184.4478793 | 6.579106694 | 7.49E-18    | 28.03539871 |
| LRCH3        | NM_032773    | 181.3256137 | 0.078054105 | 6.43E-30    | 2323.075957 |
| TPCN1        | NM_017901    | 178.4684708 | 1.976636022 | 1.69E-18    | 90.28899043 |
| NUP54        | NR_103781    | 124.1827566 | 2.114095346 | 2.64E-13    | 58.7403765  |
| DCAF4        | NM_181341    | 34.55083703 | 2.608895603 | 0.003783074 | 13.24347244 |
| LACTB        | NM_032857    | 61.06049096 | 3.756665867 | 4.18E-05    | 16.25390522 |
| MRPS23       | NM_016070    | 102.1209819 | 1.275767165 | 1.99E-12    | 80.04672383 |
| TOP3B        | NM_001282112 | 192.2239396 | 5.324886303 | 3.96E-18    | 36.09916319 |
| BAK1         | NM_001188    | 112.4890624 | 5.687037237 | 6.10E-10    | 19.77990607 |
| SLC30A7      | NM_133496    | 98.2033481  | 1.077522042 | 5.74E-10    | 91.13813388 |
| POLG         | NM_002693    | 198.4684708 | 8.109249254 | 1.12E-17    | 24.47433352 |
| TAF5L        | NM_014409    | 34.55083703 | 0.646575366 | 0.000236985 | 53.43667397 |
| TRIM5        | NM_033093    | 38.46847084 | 1.713855794 | 0.00131376  | 22.44557037 |
| DBNL         | NM_001014436 | 118.9987163 | 2.274487044 | 6.40E-13    | 52.31892468 |
| HIF1A        | NM_181054    | 120.7953682 | 1.986498387 | 1.80E-12    | 60.80818841 |
| ATG3         | NM_001278712 | 61.3256137  | 0.692053683 | 6.97E-08    | 88.61395462 |
| TMEM69       | NM_016486    | 135.8764507 | 4.609089847 | 4.17E-14    | 29.48010458 |
| NCKIPSD      | NM_016453    | 201.3256137 | 0.744005683 | 3.06E-29    | 270.5968762 |
| MAPK1        | NM_138957    | 147.5701449 | 0.637422906 | 4.03E-18    | 231.5105771 |
| SLC25A15     | NM_014252    | 146.2445312 | 4.047422809 | 1.49E-14    | 36.13275363 |
| UBE4A        | NM_004788    | 92.22393965 | 0.73116785  | 1.36E-10    | 126.132378  |
| LOC100505915 | NR_125434    | 87.03989941 | 2.483790865 | 1.39E-08    | 35.04316754 |
| GPS1         | NM_004127    | 54.28571429 | 8.024382246 | 0.001363399 | 6.765095757 |
| TRIM32       | NM_001099679 | 72.22393965 | 1.719066434 | 4.04E-08    | 42.01346628 |
| PLEKHG3      | NM_015549    | 90.16216501 | 2.524355317 | 3.00E-09    | 35.71690736 |
| C11orf24     | NM_022338    | 127.3050222 | 6.24077878  | 2.54E-11    | 20.39889998 |
| TBRG1        | NM_032811    | 133.5495533 | 3.027536215 | 9.36E-15    | 44.11162868 |
| OS9          | NM_001261420 | 25.24324752 | 0.919942369 | 0.003212876 | 27.44003142 |
| SLC31A1      | NM_001859    | 75.61132799 | 0.917605614 | 5.34E-08    | 82.40068153 |
| ARHGEF39     | NM_032818    | 124.1827566 | 10.97878331 | 2.50E-09    | 11.31115836 |
| TFCP2L1      | NM_014553    | 177.9382254 | 0.409834491 | 1.92E-24    | 434.1709383 |
| DYRK2        | NM_003583    | 129.6319195 | 2.882197453 | 5.31E-14    | 44.97676569 |
| RTKN         | NM_033046    | 73.28443061 | 4.058928668 | 8.94E-07    | 18.05511666 |
| SF3B1        | NM_001005526 | 81.85585918 | 0.709143463 | 7.59E-11    | 115.4291952 |
| FOXO1        | NM_002015    | 135.3462052 | 1.140498627 | 6.93E-14    | 118.6728349 |
| FRAS1        | NM_025074    | 66.50965393 | 0.722083345 | 3.65E-07    | 92.10800159 |
| BTG3         | NM_006806    | 146.7747767 | 2.140067764 | 3.53E-16    | 68.58417249 |
| UBE2G2       | NM_003343    | 100.7953682 | 2.516433963 | 2.17E-10    | 40.05484337 |
| BBS1         | NM_024649    | 107.3050222 | 3.560716948 | 2.06E-10    | 30.13579111 |
| MARK2        | NM_004954    | 41.06049096 | 2.236254811 | 0.001204423 | 18.36127563 |
| UTP14A       | NM_001166221 | 57.40797988 | 3.853715315 | 9.45E-05    | 14.89678796 |
| TAF6         | NM_005641    | 119.5289618 | 7.371746509 | 5.85E-10    | 16.21446989 |
| EIF4EBP1     | NM_004095    | 97.67310262 | 2.707611311 | 4.32E-10    | 36.07353176 |
| APBB3        | NM_006051    | 82.91635014 | 11.18902456 | 1.23E-05    | 7.410507477 |
| GSDMD        | NM_001166237 | 145.9794085 | 11.96572407 | 5.16E-11    | 12.19979732 |
| WDR1         | NM_017491    | 88.83655131 | 6.867694697 | 8.57E-07    | 12.93542524 |
| OSER1-AS1    | NR_038337    | 118.7335936 | 3.059594671 | 1.29E-12    | 38.80696836 |
| C19orf12     | NM_001256047 | 89.36679679 | 6.472673543 | 3.47E-07    | 13.80678265 |
| JKAMP        | NM_001284203 | 78.73359358 | 1.249394963 | 3.47E-09    | 63.01737714 |
| ZMYM1        | NM_001289089 | 73.81467609 | 1.694526725 | 1.24E-07    | 43.56064439 |
| RBPJ         | NM_005349    | 75.08108251 | 1.744213655 | 4.44E-07    | 43.04580593 |
| RFT1         | NM_052859    | 123.9176338 | 1.127809219 | 5.54E-14    | 109.8746417 |
| LOC101928053 | NR_120540    | 105.9794085 | 0.491058348 | 2.57E-15    | 215.8183624 |
| IL4R         | NM_001257997 | 66.77477667 | 2.363323618 | 2.44E-06    | 28.25460558 |
| FBXW5        | NM_018998    | 69.10167405 | 15.39866372 | 0.001891504 | 4.487511079 |
| SIKE1        | NR_049741    | 144.4478793 | 3.092959566 | 1.28E-15    | 46.70215573 |
| GFPT2        | NM_005110    | 135.3462052 | 1.342889337 | 1.00E-14    | 100.787311  |
| AIMP2        | NM_006303    | 118.7335936 | 10.72225547 | 9.23E-09    | 11.07356507 |

|            |              |             |             |             |             |
|------------|--------------|-------------|-------------|-------------|-------------|
| ZNF557     | NM_001044387 | 177.9382254 | 4.691841255 | 1.87E-17    | 37.92503106 |
| FUNDC1     | NM_173794    | 37.67310262 | 0.977570006 | 0.000767477 | 38.53749848 |
| MIDI1P1    | NM_001098791 | 120.5302455 | 22.69207623 | 2.40E-06    | 5.311556522 |
| CYB5R2     | NM_016229    | 115.0810825 | 6.363033294 | 5.65E-10    | 18.08588407 |
| USP28      | NM_020886    | 128.8365513 | 0.793183161 | 1.36E-15    | 162.429761  |
| NUP43      | NR_104456    | 81.3256137  | 0.901148789 | 1.56E-09    | 90.24659934 |
| ZNF518B    | NM_053042    | 43.38738834 | 5.142164912 | 0.002368995 | 8.437572322 |
| CCDC112    | NM_001040440 | 80.53024548 | 0.79635689  | 2.41E-09    | 101.123311  |
| PRC1       | NM_001267580 | 58.46847084 | 4.093527897 | 0.00011035  | 14.28314948 |
| ARL8B      | NM_018184    | 72.75418513 | 0.635745745 | 7.62E-09    | 114.4391225 |
| RRN3       | NM_018427    | 149.3667968 | 0.624484811 | 1.64E-19    | 239.184035  |
| ZNF641     | NM_001172681 | 123.6525111 | 3.567078791 | 2.35E-12    | 34.66492284 |
| MATR3      | NM_018834    | 137.9382254 | 2.968870501 | 2.33E-14    | 46.46151636 |
| NFKBIB     | NR_040515    | 79.26383906 | 0.681916443 | 2.62E-11    | 116.236879  |
| POLI       | NM_007195    | 74.34492157 | 1.571377698 | 7.17E-08    | 47.31193631 |
| NAA30      | NM_001011713 | 77.67310262 | 0.828772544 | 2.89E-09    | 93.72065127 |
| PBDC1      | NM_016500    | 74.55083703 | 4.151189611 | 6.10E-07    | 17.95890913 |
| ZDHHC16    | NM_198044    | 178.7335936 | 8.500869756 | 8.13E-16    | 21.0253302  |
| ATRIIP     | NM_001271022 | 141.5907364 | 3.989436862 | 1.40E-14    | 35.49140927 |
| LSM6       | NM_007080    | 92.75418513 | 2.581436535 | 2.66E-09    | 35.93122816 |
| INIP       | NM_021218    | 75.34620525 | 2.020379029 | 1.30E-07    | 37.29310401 |
| CDC14A     | NM_033312    | 172.4890624 | 0.352033317 | 1.25E-21    | 489.9793693 |
| ZNF552     | NM_024762    | 123.3873883 | 5.583888578 | 2.40E-11    | 22.09703625 |
| KIAA0430   | NM_001184999 | 65.97940845 | 3.46913079  | 3.06E-06    | 19.01900287 |
| ZNF324B    | NM_207395    | 130.162165  | 5.77212015  | 7.76E-13    | 22.55014823 |
| FAM168A    | NM_015159    | 75.61132799 | 1.053016046 | 3.52E-08    | 71.80453544 |
| DHX40      | NM_001166301 | 58.2033481  | 2.022141213 | 1.56E-05    | 28.78302847 |
| ZDHHC8P1   | NR_003950    | 54.81595977 | 1.03657257  | 1.95E-06    | 52.88193162 |
| GTF2B      | NM_001514    | 141.3256137 | 0.92414715  | 7.48E-17    | 152.9254445 |
| FXR2       | NM_004860    | 106.2445312 | 3.924493929 | 5.82E-10    | 27.07216093 |
| SLC16A13   | NM_201566    | 95.08108251 | 8.974619701 | 6.99E-07    | 10.5944414  |
| TTLL13     | NR_104604    | 78.73359358 | 5.5423529   | 8.93E-07    | 14.20580663 |
| LPCAT4     | NM_153613    | 46.24453119 | 5.995617914 | 0.003212944 | 7.713055077 |
| COMMD5     | NM_014066    | 118.9987163 | 11.92265274 | 2.83E-08    | 9.980892582 |
| DNMBP      | NM_015221    | 54.55083703 | 2.943856447 | 5.74E-05    | 18.53039984 |
| TIMM8B     | NM_012459    | 101.060491  | 21.24959371 | 0.000117248 | 4.755878739 |
| MIDN       | NM_177401    | 223.1222656 | 25.31444163 | 2.24E-14    | 8.814030697 |
| MSRB1      | NM_016332    | 76.14157347 | 8.180409532 | 1.95E-05    | 9.307794819 |
| SNRPE      | NM_003094    | 58.46847084 | 1.635761096 | 1.24E-06    | 35.74389376 |
| MDH2       | NM_001282404 | 146.7747767 | 6.090073632 | 2.97E-13    | 24.10065716 |
| LENG1      | NM_024316    | 118.2033481 | 23.21022249 | 7.83E-06    | 5.092727921 |
| CDC40      | NM_015891    | 90.16216501 | 0.189862792 | 1.16E-13    | 474.8806433 |
| C15orf57   | NM_001080792 | 127.0398994 | 4.696035328 | 4.90E-12    | 27.05258597 |
| LYSMD2     | NM_153374    | 60.79536822 | 2.585994811 | 2.95E-06    | 23.50947031 |
| PITPNA-AS1 | NR_028514    | 161.060491  | 12.77800281 | 3.75E-10    | 12.60451209 |
| LINC00869  | NR_111952    | 40.26512274 | 1.59671999  | 0.000882863 | 25.21739753 |
| SLC20A2    | NM_001257181 | 43.65251108 | 0.500766614 | 4.95E-05    | 87.17136856 |
| TMCO3      | NM_017905    | 152.7541851 | 1.658741391 | 3.04E-16    | 92.09041626 |
| ZNF81      | NM_007137    | 48.83655131 | 0.466455914 | 7.09E-06    | 104.6970353 |
| SREBF2     | NM_004599    | 94.81595977 | 3.702751208 | 4.78E-09    | 25.60689456 |
| STX18      | NM_016930    | 93.01930787 | 1.133562756 | 1.47E-10    | 82.05924847 |
| LIAS       | NM_001278591 | 121.8558592 | 7.508177808 | 2.89E-10    | 16.22975138 |
| CUL9       | NM_015089    | 106.5096539 | 3.022897685 | 1.13E-10    | 35.23429009 |
| CDKN2A     | NM_058195    | 43.1222656  | 1.001048294 | 0.000213744 | 43.07710811 |
| TWSG1      | NM_020648    | 123.3873883 | 0.610192494 | 1.39E-15    | 202.2105966 |
| SDHAP1     | NR_003264    | 129.8970423 | 5.588327892 | 6.46E-12    | 23.24434872 |
| IFT22      | NM_001287525 | 69.10167405 | 4.995495426 | 1.15E-05    | 13.83279698 |
| RHNO1      | NM_001257098 | 112.7541851 | 3.584278211 | 1.34E-11    | 31.45798917 |
| LOC257396  | NR_034107    | 149.6319195 | 6.128983746 | 1.72E-14    | 24.41382221 |
| DIDO1      | NM_001193370 | 92.75418513 | 4.31759241  | 5.10E-08    | 21.48284885 |
| PTPN18     | NM_014369    | 187.8352676 | 11.45514858 | 2.65E-15    | 16.39745363 |
| CWC25      | NM_017748    | 47.30502215 | 0.551683107 | 1.46E-06    | 85.74672951 |
| ANAPC4     | NM_013367    | 181.5907364 | 2.05605296  | 2.12E-20    | 88.32006763 |
| VAMP1      | NM_199245    | 115.611328  | 9.704001325 | 9.87E-09    | 11.91377908 |

|              |              |             |             |             |             |
|--------------|--------------|-------------|-------------|-------------|-------------|
| CPVL         | NM_031311    | 63.38738834 | 0.736707068 | 4.00E-07    | 86.0415097  |
| NT5DC1       | NM_152729    | 216.1415735 | 0.510574683 | 1.07E-26    | 423.3299857 |
| SLMO2        | NM_016045    | 78.46847084 | 4.915139399 | 1.55E-06    | 15.9646481  |
| CCNJL        | NM_024565    | 63.91763382 | 1.208774838 | 3.17E-06    | 52.8780314  |
| CFLIP1       | NR_028492    | 84.71300204 | 0.267378877 | 2.52E-13    | 316.8275785 |
| FBXO3        | NM_033406    | 77.93822536 | 0.08150236  | 1.82E-13    | 956.2695583 |
| TMEM254-AS1  | NR_027432    | 84.97812478 | 1.64813181  | 4.23E-09    | 51.56027221 |
| ERMAP        | NM_001017922 | 117.1428571 | 0.900086461 | 1.91E-14    | 130.1462274 |
| COX7A2L      | NM_004718    | 69.63191953 | 0.434833298 | 1.19E-09    | 160.1347457 |
| ATRX         | NM_000489    | 100         | 0.057548354 | 3.86E-14    | 1737.669175 |
| RPAP2        | NM_024813    | 238.2033481 | 1.147198666 | 1.14E-26    | 207.6391432 |
| LETMD1       | NR_045018    | 140.2651227 | 6.573645491 | 2.34E-12    | 21.33749423 |
| KDM6A        | NM_001291416 | 49.10167405 | 0.539525584 | 1.69E-05    | 91.00898184 |
| RNF217-AS1   | NR_026876    | 27.57014489 | 1.087379433 | 0.002110281 | 25.35466835 |
| EDF1         | NM_003792    | 55.34620525 | 5.470184098 | 0.000173188 | 10.11779572 |
| MAN1B1       | NR_045720    | 124.1827566 | 1.024961792 | 1.86E-15    | 121.1584251 |
| SIN3A        | NM_015477    | 40.53024548 | 2.230728747 | 0.001236335 | 18.16906046 |
| TSEN15       | NR_125335    | 161.3256137 | 0.602166817 | 1.01E-22    | 267.9085081 |
| WHSC1L1      | NM_017778    | 58.46847084 | 0.888932625 | 9.79E-07    | 65.77379342 |
| C14orf93     | NM_001130706 | 55.87645073 | 5.643323591 | 0.000117106 | 9.901337363 |
| MANEAL       | NM_001113482 | 60.53024548 | 1.652987793 | 2.22E-06    | 36.61868874 |
| CALCOCO2     | NM_001261395 | 119.2638391 | 2.138717423 | 6.44E-13    | 55.76418736 |
| BPGM         | NM_199186    | 117.9382254 | 0.055840204 | 1.03E-20    | 2112.06651  |
| PITPNB       | NM_001284277 | 77.40797988 | 1.266991748 | 9.55E-08    | 61.09588323 |
| CCT2         | NM_001198842 | 80.79536822 | 4.007465479 | 2.18E-07    | 20.16121377 |
| C7orf49      | NM_001243751 | 113.8146761 | 15.86371653 | 4.48E-07    | 7.174527851 |
| TRAF4        | NM_004295    | 106.2445312 | 11.95816546 | 3.05E-07    | 8.884684828 |
| UPF3A        | NM_023011    | 73.28443061 | 3.606127883 | 1.50E-06    | 20.32219405 |
| PTPN6        | NM_080548    | 106.2445312 | 3.633617206 | 1.31E-10    | 29.23932962 |
| EPHX2        | NM_001256482 | 128.1003904 | 1.711092182 | 1.27E-13    | 74.86469268 |
| SNX22        | NR_073534    | 131.9588169 | 16.69420356 | 1.41E-08    | 7.904469143 |
| PEX19        | NR_036493    | 50.42728775 | 3.551066249 | 0.000130973 | 14.20060461 |
| CENPM        | NM_024053    | 90.16216501 | 4.827328861 | 2.27E-08    | 18.67744411 |
| NMT2         | NM_004808    | 175.0810825 | 1.732637285 | 8.92E-19    | 101.0488947 |
| SCAMP4       | NM_079834    | 101.3256137 | 4.757116746 | 2.83E-09    | 21.29979547 |
| SNAPIN       | NR_052020    | 140.7953682 | 17.46684796 | 1.18E-08    | 8.060719857 |
| RPS16        | NM_001020    | 124.713002  | 15.48704011 | 4.47E-08    | 8.052733198 |
| RASAL2       | NM_170692    | 92.75418513 | 0.182579894 | 9.25E-11    | 508.0197109 |
| GTF2IP1      | NR_002206    | 66.50965393 | 7.99753911  | 0.000136792 | 8.316264918 |
| MUL1         | NM_024544    | 90.16216501 | 1.800842279 | 1.30E-10    | 50.06666384 |
| DPH3         | NM_206831    | 65.97940845 | 2.735537358 | 1.34E-06    | 24.11935932 |
| ZNF354A      | NM_005649    | 151.9588169 | 0.689717525 | 2.57E-21    | 220.3203651 |
| SNX6         | NM_152233    | 181.3256137 | 1.738653228 | 2.88E-19    | 104.2908446 |
| HAX1         | NM_001018837 | 64.4478793  | 0.24285176  | 1.28E-09    | 265.3795029 |
| SYS1         | NM_001099791 | 81.59073644 | 3.837065642 | 7.08E-08    | 21.2638365  |
| POLD2        | NM_001127218 | 113.2844306 | 4.585891898 | 3.24E-11    | 24.70281313 |
| LOC100133315 | NR_029192    | 83.38738834 | 1.107077678 | 1.51E-08    | 75.32207537 |
| RNF113A      | NM_006978    | 71.95881691 | 10.06096641 | 0.000437153 | 7.152276824 |
| RETSAT       | NM_017750    | 115.0810825 | 5.14027075  | 1.76E-10    | 22.38813636 |
| BICD1        | NM_001714    | 34.81595977 | 0.618182768 | 0.000643394 | 56.31984839 |
| LOC100996447 | NR_104147    | 21.3256137  | 0.119552921 | 0.00460699  | 178.3780229 |
| COPS7A       | NM_001164093 | 84.4478793  | 3.565677046 | 3.73E-08    | 23.68354683 |
| MYNN         | NR_033702    | 137.9382254 | 2.842376711 | 8.81E-15    | 48.52918504 |
| NUDT4P1      | NR_002212    | 144.9781248 | 3.354944025 | 9.15E-15    | 43.21327679 |
| PLEKHA5      | NM_001143821 | 54.28571429 | 0.637485835 | 4.38E-06    | 85.15595371 |
| WBSCR16      | NM_001281441 | 106.2445312 | 2.63952858  | 1.16E-10    | 40.25132821 |
| M1AP         | NM_138804    | 93.01930787 | 0.977864418 | 6.74E-11    | 95.12495413 |
| TPP2         | NM_003291    | 85.97940845 | 0.903981154 | 5.10E-10    | 95.11194795 |
| MYBL2        | NM_002466    | 45.97940845 | 2.428332738 | 0.000295275 | 18.93455857 |
| ATP5J2       | NM_004889    | 123.6525111 | 8.166308202 | 5.65E-10    | 15.14178843 |
| SLC25A51     | NR_024872    | 95.61132799 | 3.857802398 | 1.31E-08    | 24.78388423 |
| XPNPEP1      | NM_001167604 | 104.713002  | 2.422948447 | 1.37E-10    | 43.21718119 |
| ATP6V1C2     | NM_001039362 | 29.89704227 | 1.017322236 | 0.002161945 | 29.38797681 |
| MMAA         | NM_172250    | 54.81595977 | 0.302624149 | 1.50E-07    | 181.1354444 |

|              |              |             |             |             |             |
|--------------|--------------|-------------|-------------|-------------|-------------|
| ACTN1-AS1    | NR_073422    | 46.24453119 | 3.559650472 | 0.000541592 | 12.99131236 |
| QSOX1        | NM_001004128 | 189.6319195 | 0.622995344 | 9.25E-25    | 304.3873785 |
| C2CD2L       | NM_001290474 | 54.81595977 | 1.560555815 | 3.08E-06    | 35.12592068 |
| RDH14        | NM_020905    | 83.91763382 | 8.209321868 | 1.72E-06    | 10.22223701 |
| TNFRSF10D    | NM_003840    | 163.9176338 | 3.647654814 | 2.22E-16    | 44.93781407 |
| ZRSR2        | NM_005089    | 100.7953682 | 0.925123184 | 1.04E-11    | 108.9534562 |
| PPM1H        | NM_020700    | 68.83655131 | 0.148224919 | 2.42E-08    | 464.4060655 |
| TDRKH        | NM_001083965 | 47.30502215 | 1.247928444 | 3.19E-05    | 37.90683863 |
| GTF2I        | NM_001518    | 70.42728775 | 0.795800176 | 3.03E-08    | 88.4987084  |
| PDIA5        | NR_028444    | 109.6319195 | 2.489656015 | 1.36E-10    | 44.03496662 |
| MAPK6        | NM_002748    | 78.2033481  | 2.013853029 | 1.09E-07    | 38.83269881 |
| ZNF544       | NM_014480    | 154.875167  | 2.548106831 | 8.94E-17    | 60.78048423 |
| CCDC173      | NM_001085447 | 47.30502215 | 0.326757683 | 1.87E-06    | 144.7709559 |
| S1PR2        | NM_004230    | 100.7953682 | 2.293479269 | 3.43E-11    | 43.94867204 |
| TMEM60       | NM_032936    | 75.87645073 | 8.87843939  | 1.95E-05    | 8.546147289 |
| DLG          | NM_001289752 | 78.99871632 | 0.849644364 | 3.10E-09    | 92.97856805 |
| SNX11        | NM_152244    | 128.3655131 | 4.809548816 | 5.49E-12    | 26.68972039 |
| RNF139-AS1   | NR_108047    | 175.8764507 | 9.537484725 | 3.95E-15    | 18.44054861 |
| DNAL4        | NM_005740    | 58.73359358 | 1.222628372 | 8.28E-07    | 48.03879487 |
| GTF2A1       | NM_001278940 | 157.9382254 | 2.94825939  | 1.98E-16    | 53.56998978 |
| CDC23        | NM_004661    | 69.63191953 | 2.299844387 | 5.32E-07    | 30.27679608 |
| KCNQ2        | NM_004518    | 80.79536822 | 1.319655558 | 4.70E-08    | 61.22458828 |
| USP46        | NM_022832    | 68.57142857 | 1.394105375 | 9.78E-07    | 49.18668975 |
| PTGES3       | NM_006601    | 84.97812478 | 6.655545189 | 1.08E-06    | 12.7680186  |
| PDCL         | NM_005388    | 87.03989941 | 5.449666055 | 2.43E-07    | 15.97160239 |
| ITGA6        | NM_001079818 | 148.3655131 | 1.789511541 | 2.31E-15    | 82.90838572 |
| LOC100288842 | NR_027442    | 177.9382254 | 3.508293719 | 2.86E-20    | 50.71930677 |
| ARL2BP       | NM_012106    | 138.4684708 | 5.007153647 | 3.46E-13    | 27.65412859 |
| CCDC13       | NM_144719    | 25.97940845 | 0.436939874 | 0.003388022 | 59.45762787 |
| UBAP2L       | NM_001287816 | 54.28571429 | 2.006863838 | 3.53E-05    | 27.05002365 |
| FAM213B      | NM_001195736 | 89.36679679 | 7.222907179 | 6.91E-07    | 12.37269074 |
| TBC1D23      | NM_001199198 | 30.42728775 | 0.585983713 | 0.000822358 | 51.92514246 |
| DUSP19       | NM_080876    | 80.26512274 | 3.096525966 | 2.37E-07    | 25.92102363 |
| WNK1         | NM_001184985 | 32.22393965 | 0.825006085 | 0.001243752 | 39.05903272 |
| SRSF2        | NM_003016    | 171.7529015 | 42.54832596 | 1.18E-06    | 4.036654735 |
| PDIA4        | NM_004911    | 50.69241049 | 3.187586543 | 6.15E-05    | 15.90306955 |
| IPO4         | NM_024658    | 97.93822536 | 8.400723273 | 1.09E-07    | 11.65830872 |
| EPM2A        | NM_001018041 | 106.7747767 | 1.092986397 | 5.90E-12    | 97.69085593 |
| JMY          | NM_152405    | 63.91763382 | 0.190364255 | 1.84E-08    | 335.7648938 |
| APPL2        | NM_018171    | 137.9382254 | 2.084747604 | 3.67E-14    | 66.16543178 |
| IFRD1        | NR_120333    | 187.5701449 | 2.070930272 | 4.34E-21    | 90.57289248 |
| TRAPPC6B     | NM_001079537 | 135.3462052 | 3.09024637  | 1.15E-13    | 43.79786886 |
| ST3GAL5-AS1  | NR_110569    | 44.4478793  | 2.442414836 | 0.000359496 | 18.19833332 |
| GTF3A        | NM_002097    | 86.77477667 | 7.891694495 | 2.34E-06    | 10.99570906 |
| USP3         | NM_001256702 | 57.40797988 | 1.14534098  | 1.67E-06    | 50.12304709 |
| MPP1         | NM_001166462 | 37.67310262 | 0.936098913 | 0.000119282 | 40.24478836 |
| RABGGTA      | NM_182836    | 104.4478793 | 7.196470979 | 1.49E-08    | 14.5137637  |
| PTPN4        | NM_002830    | 58.46847084 | 0.253636247 | 9.60E-07    | 230.5209591 |
| SH3GL1       | NM_003025    | 63.91763382 | 5.313264958 | 4.10E-05    | 12.0298224  |
| POLDIP3      | NR_103820    | 135.0810825 | 4.052061663 | 7.84E-13    | 33.33638373 |
| YES1         | NM_005433    | 118.4684708 | 0.742788009 | 5.40E-14    | 159.4916308 |
| YIPF5        | NM_001024947 | 66.77477667 | 2.453936143 | 3.77E-07    | 27.21129352 |
| MAGI1        | NM_004742    | 64.4478793  | 0.794769052 | 4.09E-07    | 81.09007158 |
| DARS2        | NM_018122    | 100.7953682 | 0.102015417 | 4.09E-17    | 988.0405455 |
| RNF44        | NM_014901    | 75.87645073 | 4.348981959 | 2.58E-07    | 17.44694539 |
| NFXL1        | NM_001278624 | 161.3256137 | 0.168503577 | 9.73E-25    | 957.4017141 |
| TIMM9        | NM_012460    | 64.4478793  | 2.251671456 | 7.03E-07    | 28.62223932 |
| A2M-AS1      | NR_026971    | 86.50965393 | 10.59729402 | 1.21E-05    | 8.163372065 |
| DIAPH2       | NM_007309    | 60          | 0.085768595 | 5.26E-07    | 699.556752  |
| HSD17B11     | NM_016245    | 67.03989941 | 1.031809053 | 1.09E-06    | 64.9731646  |
| CCNC         | NM_001013399 | 101.8558592 | 2.477263182 | 5.44E-11    | 41.11628506 |
| KIF4A        | NM_012310    | 60.53024548 | 0.308705719 | 2.62E-07    | 196.0774998 |
| NIPSNAP1     | NM_003634    | 110.162165  | 6.405885727 | 2.93E-09    | 17.19702313 |
| RALY         | NM_016732    | 102.3861047 | 4.284392418 | 7.20E-09    | 23.89746192 |

|              |              |             |             |             |             |
|--------------|--------------|-------------|-------------|-------------|-------------|
| LGMN         | NM_001008530 | 109.6319195 | 0.714460395 | 9.11E-13    | 153.4471614 |
| DCAF16       | NM_017741    | 181.8558592 | 1.076984063 | 1.50E-24    | 168.8565925 |
| RPL14        | NM_003973    | 132.4890624 | 11.14403266 | 6.94E-10    | 11.88878985 |
| PPAPDC1B     | NM_032483    | 154.8159598 | 7.396657135 | 9.82E-14    | 20.93053077 |
| LACC1        | NM_001128303 | 75.34620525 | 3.7536086   | 7.76E-07    | 20.07300528 |
| CAPN10       | NM_023085    | 112.4890624 | 2.654802759 | 4.28E-12    | 42.37190956 |
| MUT          | NM_000255    | 60.53024548 | 0.129146636 | 1.13E-09    | 468.69394   |
| POLH         | NM_006502    | 189.6319195 | 3.090413686 | 7.68E-19    | 61.36133825 |
| UQCRB        | NR_045639    | 69.69112681 | 7.090876808 | 2.02E-05    | 9.828280578 |
| TBC1D4       | NM_001286658 | 135.611328  | 0.633442482 | 3.20E-15    | 214.0862538 |
| SPTBN1       | NM_003128    | 82.85714286 | 1.404584407 | 7.49E-08    | 58.99050454 |
| DGKD         | NM_152879    | 71.42857143 | 1.420512901 | 7.80E-07    | 50.28364852 |
| MATN2        | NM_002380    | 107.0398994 | 1.284091595 | 2.45E-10    | 83.35846122 |
| LMTK2        | NM_014916    | 76.40669621 | 0.996254347 | 8.70E-09    | 76.69396516 |
| ENTPD4       | NM_004901    | 103.1222656 | 0.832026716 | 1.74E-12    | 123.9410509 |
| RNF145       | NM_001199380 | 63.65251108 | 1.71514508  | 3.89E-06    | 37.11202732 |
| POLE2        | NM_001197331 | 98.2033481  | 1.323742881 | 1.33E-10    | 74.18611991 |
| CARF         | NM_024744    | 55.08108251 | 0.089985667 | 4.19E-08    | 612.1095075 |
| NAA25        | NM_024953    | 55.08108251 | 1.928888741 | 4.43E-05    | 28.55586293 |
| HRH1         | NM_001098213 | 46.50965393 | 2.420659646 | 0.000375315 | 19.21362799 |
| CHAF1A       | NM_005483    | 42.12098192 | 3.480147981 | 0.000607662 | 12.10321577 |
| CFAP36       | NM_080667    | 43.91763382 | 2.304283358 | 0.000413984 | 19.05912902 |
| MRPS16       | NM_016065    | 143.6525111 | 21.86448603 | 2.44E-08    | 6.570129794 |
| PITX1        | NM_002653    | 46.24453119 | 5.789156297 | 0.002632549 | 7.988129673 |
| PDE12        | NM_177966    | 147.5701449 | 3.015646982 | 6.52E-17    | 48.93482088 |
| FBXO22       | NM_147188    | 192.7541851 | 3.407253706 | 1.08E-19    | 56.57171486 |
| NDUFB5       | NM_001199958 | 70.69241049 | 0.769060095 | 1.11E-08    | 91.92052861 |
| ERVK13-1     | NR_040023    | 91.95881691 | 5.1386797   | 1.01E-07    | 17.89541717 |
| CAMKMT       | NM_024766    | 155.611328  | 0.13802516  | 4.27E-19    | 1127.412769 |
| LOC101928436 | NM_001286997 | 37.40797988 | 0.007655328 | 1.52E-06    | 4886.528965 |
| MYCL         | NM_001033081 | 58.2033481  | 8.421585514 | 0.000891949 | 6.911210247 |
| PTOV1        | NM_017432    | 80          | 17.82673752 | 0.000443522 | 4.487641102 |
| SCML2        | NM_006089    | 40.53024548 | 0.327385551 | 7.62E-05    | 123.7997382 |
| ESPN         | NM_031475    | 203.6525111 | 13.74122835 | 6.86E-16    | 14.82054631 |
| MAGOHB       | NM_001300739 | 30.16216501 | 1.529198383 | 0.002908802 | 19.72416748 |
| SMS          | NM_001258423 | 74.55083703 | 1.597913092 | 2.03E-07    | 46.65512625 |
| PUS7L        | NM_001098615 | 63.65251108 | 0.670463125 | 2.74E-08    | 94.93812364 |
| PHLDA3       | NM_012396    | 103.3873883 | 11.49082361 | 4.06E-07    | 8.997387122 |
| C6orf132     | NM_001164446 | 75.61132799 | 3.889605685 | 2.70E-06    | 19.43932987 |
| MORC4        | NM_001085354 | 46.24453119 | 0.712870453 | 1.68E-05    | 64.8708766  |
| STIM2        | NM_001169118 | 86.50965393 | 0.478949203 | 5.77E-10    | 180.6238605 |
| SLC39A3      | NM_144564    | 98.73359358 | 2.193921399 | 9.34E-12    | 45.00325018 |
| VASP         | NM_003370    | 132.7541851 | 9.581129029 | 1.84E-10    | 13.85579765 |
| PHF14        | NR_033436    | 64.18275656 | 0.222498851 | 1.28E-07    | 288.4633173 |
| POMGNT1      | NM_017739    | 98.46847084 | 3.779542225 | 4.90E-10    | 26.05301515 |
| CMTM7        | NM_181472    | 160.7953682 | 2.620481626 | 1.89E-16    | 61.36099815 |
| ICT1         | NM_001545    | 176.4066962 | 6.880095021 | 1.25E-16    | 25.64015405 |
| RAB23        | NM_001278667 | 212.7541851 | 2.222323318 | 5.28E-23    | 95.73502802 |
| MRPL17       | NM_022061    | 157.9382254 | 13.41433707 | 8.46E-12    | 11.77383754 |
| TMC6         | NM_001127198 | 124.713002  | 8.165712728 | 3.43E-10    | 15.27276383 |
| SLC25A36     | NM_018155    | 129.3667968 | 0.083486547 | 3.17E-22    | 1549.552611 |
| PHLDA2       | NM_003311    | 166.7747767 | 25.80384791 | 1.10E-07    | 6.463174688 |
| RBP1         | NM_001130993 | 98.99871632 | 5.054984109 | 9.36E-09    | 19.58437736 |
| TMEM17       | NM_198276    | 47.30502215 | 2.281031866 | 0.00010272  | 20.73843109 |
| UAPI         | NM_003115    | 144.4478793 | 2.520970439 | 1.37E-15    | 57.29852167 |
| UBQLN4       | NM_020131    | 66.50965393 | 3.039324886 | 1.06E-06    | 21.88303535 |
| LOC101928794 | NR_111908    | 66.77477667 | 4.324809151 | 6.20E-06    | 15.43993604 |
| BTBD10       | NM_032320    | 150.6924105 | 0.367215601 | 1.44E-20    | 410.3649461 |
| STX3         | NM_001178040 | 42.38610466 | 3.441642101 | 0.000642194 | 12.31566311 |
| SERPINE1     | NM_000602    | 97.40797988 | 6.181151297 | 2.21E-08    | 15.75887326 |
| GPR108       | NM_001080452 | 69.63191953 | 8.189955492 | 7.93E-05    | 8.502112081 |
| OSR2         | NM_001142462 | 256.4066962 | 4.967434568 | 5.13E-28    | 51.61752866 |
| RAB3IL1      | NM_013401    | 71.95881691 | 1.088078751 | 3.23E-08    | 66.13383162 |
| ZC3H6        | NM_198581    | 79.26383906 | 0.835120202 | 1.36E-09    | 94.91309016 |

|          |              |             |             |             |             |
|----------|--------------|-------------|-------------|-------------|-------------|
| RGPD5    | NM_005054    | 258.7335936 | 4.548809951 | 2.61E-25    | 56.87940283 |
| PRKD2    | NM_001079880 | 68.83655131 | 6.625441317 | 1.29E-05    | 10.38973074 |
| ASAP3    | NM_001143778 | 71.95881691 | 1.592655295 | 4.34E-07    | 45.18166432 |
| ANGPTL4  | NR_104213    | 172.2239396 | 4.747481708 | 2.79E-17    | 36.27690431 |
| MPC1     | NM_016098    | 44.71300204 | 2.209342901 | 0.000147554 | 20.23814503 |
| HDAC2    | NR_033441    | 137.6731026 | 1.482122065 | 1.09E-15    | 92.88917958 |
| FAM115A  | NM_001206938 | 186.5096539 | 1.227400382 | 1.42E-21    | 151.9550235 |
| HERC3    | NM_001271602 | 29.36679679 | 0.803694339 | 0.002370584 | 36.53975817 |
| EIF2AK1  | NM_014413    | 149.3667968 | 3.151460415 | 1.57E-14    | 47.39605679 |
| ERAP1    | NM_016442    | 97.67310262 | 2.955705976 | 1.15E-09    | 33.04560854 |
| SLAIN2   | NM_020846    | 54.55083703 | 0.446316156 | 1.29E-06    | 122.2246525 |
| DAP3     | NM_004632    | 135.0810825 | 1.956417813 | 3.20E-14    | 69.04510971 |
| YOD1     | NM_001276320 | 66.50965393 | 9.348621308 | 0.000201047 | 7.114381013 |
| CYP24A1  | NM_001128915 | 50.42728775 | 5.500806316 | 0.000390939 | 9.167253827 |
| UAP1L1   | NM_207309    | 65.97940845 | 8.26804447  | 0.000138239 | 7.980050022 |
| CCDC113  | NM_001142302 | 61.3256137  | 1.327968497 | 3.75E-06    | 46.18002146 |
| BZW1     | NM_001207069 | 74.55083703 | 1.745106143 | 9.97E-09    | 42.71994419 |
| TCEA2    | NM_003195    | 110.162165  | 8.756969972 | 4.26E-09    | 12.57994093 |
| SGSM3    | NM_015705    | 130.162165  | 2.326891171 | 5.83E-14    | 55.93822634 |
| LUZP6    | NM_001128619 | 109.6319195 | 0.915220003 | 3.63E-12    | 119.7875037 |
| CEP55    | NM_001127182 | 132.7541851 | 1.694159842 | 8.51E-15    | 78.3598937  |
| EIF4G3   | NM_001198801 | 86.77477667 | 0.84856556  | 2.75E-09    | 102.260545  |
| LIMA1    | NM_016357    | 143.9176338 | 0.581987713 | 2.20E-17    | 247.2863785 |
| GRHPR    | NM_012203    | 137.9382254 | 10.64421815 | 1.69E-10    | 12.95898143 |
| PAWR     | NM_002583    | 134.8159598 | 1.593896681 | 1.20E-13    | 84.58262155 |
| CCDC12   | NR_102269    | 92.75418513 | 3.876947096 | 6.31E-08    | 23.92454239 |
| UNC119B  | NM_001080533 | 143.9176338 | 3.999220431 | 2.74E-14    | 35.98642193 |
| ZNF84    | NM_001289971 | 49.89704227 | 2.674634611 | 0.000111854 | 18.65564816 |
| ZNF181   | NM_001145665 | 32.75418513 | 2.063486006 | 0.003248733 | 15.87322862 |
| C11orf57 | NM_001301021 | 158.7335936 | 4.547232513 | 1.13E-16    | 34.90773633 |
| NAA35    | NM_024635    | 112.2239396 | 1.407383474 | 2.10E-11    | 79.73941838 |
| SLC3A2   | NM_001012664 | 112.4890624 | 11.95749694 | 1.59E-07    | 9.407408837 |
| THG1L    | NM_017872    | 86.50965393 | 1.036220305 | 9.25E-11    | 83.48577374 |
| RPRD2    | NM_001297673 | 80.53024548 | 0.265571359 | 3.18E-10    | 303.2339242 |
| MAVS     | NM_001206491 | 124.713002  | 11.45032772 | 1.47E-09    | 10.8916535  |
| PUS1     | NM_001002020 | 63.38738834 | 5.766746614 | 2.31E-05    | 10.99188027 |
| DDX42    | NM_203499    | 138.9987163 | 5.079819254 | 7.19E-13    | 27.3629256  |
| MICALL1  | NM_033386    | 45.97940845 | 2.394932488 | 0.000256124 | 19.19862405 |
| SETD9    | NM_153706    | 92.75418513 | 16.53497334 | 4.20E-05    | 5.609575729 |
| PAK1     | NM_002576    | 54.81595977 | 1.622630173 | 5.16E-05    | 33.7821647  |
| COMT     | NM_000754    | 100.7953682 | 6.804569223 | 4.82E-08    | 14.81289482 |
| STK4     | NM_006282    | 125.9794085 | 0.784227227 | 1.21E-14    | 160.6414623 |
| PSMC5    | NM_001199163 | 116.9369417 | 16.14112623 | 1.66E-07    | 7.244658149 |
| XRR1A1   | NM_001270380 | 98.99871632 | 0.38879001  | 1.82E-12    | 254.6328705 |
| MIEN1    | NM_032339    | 173.2844306 | 29.00750827 | 6.61E-08    | 5.973778547 |
| TUBA4B   | NR_003063    | 49.63191953 | 4.515861611 | 0.0006497   | 10.99057584 |
| LAMTOR3  | NR_024170    | 37.14285714 | 0.356499263 | 1.82E-05    | 104.1877528 |
| SMIM15   | NM_001048249 | 121.5907364 | 1.424377311 | 2.29E-15    | 85.36413455 |
| KREMEN2  | NM_024507    | 101.3256137 | 13.4685519  | 1.67E-06    | 7.523126054 |
| HOMER3   | NM_001145722 | 47.03989941 | 4.819317288 | 0.000946008 | 9.76069775  |
| DSCAS    | NR_110785    | 32.22393965 | 0.630133445 | 0.000822358 | 51.13827857 |
| TEP1     | NM_007110    | 200.5302455 | 0.231924264 | 6.75E-30    | 864.6367638 |
| IGBP1    | NM_001551    | 35.34620525 | 1.864620876 | 0.003388516 | 18.95624237 |
| CRYL1    | NM_015974    | 112.2239396 | 1.083328024 | 1.56E-12    | 103.5918366 |
| SNAI3    | NM_178310    | 46.50965393 | 3.549926385 | 0.000603196 | 13.10158265 |
| EEF1B2   | NM_021121    | 70.16216501 | 15.18381885 | 0.00079607  | 4.620851034 |
| ARMC2    | NM_001286609 | 98.46847084 | 0.31522684  | 3.71E-12    | 312.373372  |
| TOR1AIP1 | NM_001267578 | 67.03989941 | 2.867342169 | 2.25E-06    | 23.38050203 |
| GLE1     | NM_001003722 | 122.3861047 | 0.944584923 | 1.51E-14    | 129.5660154 |
| PRICKLE1 | NM_153026    | 28.83655131 | 0.771021804 | 0.002409353 | 37.40043557 |
| TRIM45   | NM_025188    | 64.4478793  | 3.891040816 | 4.78E-06    | 16.56314656 |
| MED1     | NM_004774    | 110.4272878 | 4.99631736  | 6.49E-10    | 22.1017361  |
| MRPL45   | NM_032351    | 55.87645073 | 2.712023519 | 1.31E-05    | 20.60323236 |
| TXNRD3   | NM_001173513 | 135.8764507 | 1.032929993 | 9.03E-16    | 131.5446852 |

|         |              |             |             |             |              |
|---------|--------------|-------------|-------------|-------------|--------------|
| IRAK2   | NM_001570    | 33.01930787 | 0.215457424 | 0.000192779 | 153.2521243  |
| MPC2    | NR_026550    | 66.77477667 | 2.337442338 | 7.87E-07    | 28.56745409  |
| NOM1    | NM_138400    | 90.16216501 | 3.734039407 | 2.02E-08    | 24.14601326  |
| ZNF48   | NM_001214907 | 75.08108251 | 10.87825277 | 6.37E-05    | 6.901943176  |
| MAP2K1  | NM_002755    | 117.4079799 | 2.616370178 | 2.06E-11    | 44.87437628  |
| RFC4    | NM_002916    | 77.93822536 | 5.339336795 | 7.50E-07    | 14.59698617  |
| RCE1    | NM_005133    | 149.1016741 | 18.39595097 | 1.56E-09    | 8.105135435  |
| ZC3H18  | NM_144604    | 64.18275656 | 1.04991022  | 2.27E-07    | 61.13166187  |
| GBAS    | NM_001483    | 77.67310262 | 0.650702245 | 3.66E-10    | 119.3681184  |
| B3GAT3  | NR_109991    | 135.8764507 | 9.145125458 | 1.09E-11    | 14.85780062  |
| ACVR2B  | NM_001106    | 45.97940845 | 4.034433625 | 0.001526476 | 11.39674431  |
| CAPRIN1 | NM_203364    | 162.8571429 | 2.68685924  | 3.62E-17    | 60.61245801  |
| SIRT3   | NM_012239    | 123.9176338 | 4.462142947 | 7.00E-12    | 27.77087944  |
| ICOSLG  | NM_001283052 | 107.3050222 | 4.077914326 | 7.79E-11    | 26.31370195  |
| ITSN2   | NM_006277    | 152.2239396 | 0.292613303 | 3.13E-19    | 520.2222109  |
| PXT1    | NM_152990    | 81.06049096 | 0.505099852 | 2.09E-10    | 160.4840917  |
| UNC13B  | NM_006377    | 130.6924105 | 0.03857428  | 1.75E-20    | 3388.071251  |
| CEMIP   | NM_001293304 | 37.93822536 | 0.925214148 | 0.000314345 | 41.00480462  |
| CLTCL1  | NM_001835    | 112.2239396 | 1.456184267 | 4.07E-11    | 77.06712825  |
| RPL19   | NM_000981    | 153.0193079 | 17.79257744 | 4.34E-10    | 8.600176584  |
| PAIP1   | NM_006451    | 161.8558592 | 1.190932034 | 4.74E-20    | 135.90668818 |
| LITAF   | NR_024320    | 38.99871632 | 2.624751991 | 0.00107253  | 14.85805762  |
| SNHG20  | NR_027058    | 116.6718189 | 6.923060343 | 6.61E-10    | 16.85263643  |
| ERLEC1  | NM_001127398 | 94.81595977 | 0.722992519 | 2.40E-11    | 131.1437633  |
| CNST    | NM_152609    | 95.08108251 | 0.123474104 | 1.21E-13    | 770.0487752  |
| LRTOMT  | NM_001145307 | 112.7541851 | 3.575184312 | 3.71E-11    | 31.53800624  |
| ZBED3   | NM_032367    | 130.162165  | 0.973607238 | 1.32E-17    | 133.69063    |
| GSKIP   | NM_016472    | 158.7335936 | 1.71874824  | 2.42E-19    | 92.35418539  |
| ANAPC7  | NM_001137664 | 61.85585918 | 2.475763762 | 2.99E-06    | 24.98455633  |
| IL4I1   | NM_001258017 | 106.7747767 | 3.221855785 | 1.15E-10    | 33.14076849  |
| DAGLB   | NM_139179    | 124.713002  | 3.445534837 | 8.03E-12    | 36.19554233  |
| SENP3   | NM_015670    | 46.77477667 | 6.204005179 | 0.00364738  | 7.539448361  |
| TPX2    | NM_012112    | 78.73359358 | 1.219731596 | 3.83E-08    | 64.54993362  |
| RABL2B  | NM_001130923 | 112.4890624 | 3.181856771 | 2.29E-11    | 35.35327656  |
| WDR6    | NM_018031    | 89.63191953 | 16.7019094  | 7.93E-05    | 5.366567222  |
| DMTF1   | NM_001142326 | 178.4684708 | 1.833613576 | 8.47E-20    | 97.33156056  |
| VMP1    | NM_030938    | 104.9781248 | 2.093841078 | 3.21E-10    | 50.13662491  |
| NADK2   | NM_001287340 | 26.77477667 | 0.238776718 | 0.002024804 | 112.1331128  |
| CCT7    | NM_006429    | 163.9176338 | 6.230526733 | 3.38E-15    | 26.30879231  |
| VWA9    | NM_001136043 | 112.4890624 | 3.003880803 | 1.46E-11    | 37.44791147  |
| MCEE    | NM_032601    | 89.63191953 | 1.84416655  | 6.96E-10    | 48.60294181  |
| PQLC1   | NM_001146345 | 77.40797988 | 1.181190478 | 5.22E-08    | 65.53386717  |
| RAB3D   | NM_004283    | 89.89704227 | 4.416767344 | 3.47E-08    | 20.35358335  |
| TSPAN14 | NM_001128309 | 100.2651227 | 2.396822314 | 7.01E-10    | 41.83252224  |
| BLOC1S3 | NM_212550    | 89.10167405 | 7.618910067 | 8.66E-07    | 11.69480585  |
| IL22RA1 | NM_021258    | 49.10167405 | 2.213950437 | 8.89E-05    | 22.17830771  |
| PIGM    | NM_145167    | 67.30502215 | 5.735430899 | 1.74E-05    | 11.73495476  |
| CD82    | NM_001024844 | 123.3873883 | 1.896485921 | 7.97E-13    | 65.06106213  |
| DDB2    | NM_001300734 | 81.06049096 | 4.366606059 | 4.67E-07    | 18.56372887  |
| ETFDH   | NM_004453    | 69.63191953 | 1.284489948 | 3.82E-07    | 54.20978157  |
| RNF138  | NM_016271    | 117.9382254 | 2.624630457 | 3.73E-12    | 44.93517366  |
| MEGF6   | NM_001409    | 54.81595977 | 1.287977682 | 4.44E-05    | 42.55971243  |
| ADSS    | NM_001126    | 92.22393965 | 2.022840232 | 2.40E-09    | 45.59131175  |
| PAQR5   | NM_017705    | 73.01930787 | 1.730151973 | 4.25E-07    | 42.20398497  |
| GRHL1   | NM_198182    | 55.61132799 | 0.445099295 | 5.30E-07    | 124.9413977  |
| IER5L   | NM_203434    | 193.2844306 | 33.72675532 | 1.27E-09    | 5.730893137  |
| PARL    | NM_001037639 | 112.4890624 | 1.791819114 | 1.54E-11    | 62.77925126  |
| HPSE    | NM_001098540 | 87.03989941 | 0.810748479 | 1.29E-09    | 107.3574625  |
| RBM8A   | NM_005105    | 118.4684708 | 13.12906921 | 6.78E-08    | 9.023371644  |
| SNRPD2  | NM_177542    | 72.22393965 | 13.85285299 | 0.000409919 | 5.213650912  |
| HPCAL4  | NM_001282397 | 105.5083703 | 1.189203245 | 8.30E-14    | 88.72189906  |
| CNOT4   | NM_001190849 | 124.4478793 | 0.309931906 | 9.59E-16    | 401.5329715  |
| KLF6    | NM_001160124 | 117.9382254 | 10.98978973 | 7.85E-09    | 10.73161801  |
| ASB7    | NM_198243    | 72.75418513 | 0.873607615 | 1.04E-08    | 83.28016368  |



|              |              |             |             |             |             |
|--------------|--------------|-------------|-------------|-------------|-------------|
| VPS51        | NM_013265    | 101.3256137 | 1.714892935 | 6.06E-12    | 59.08567912 |
| 11-Sep       | NM_018243    | 137.6731026 | 1.194181482 | 1.97E-14    | 115.286583  |
| GNL3         | NM_014366    | 107.8352676 | 9.688878461 | 3.87E-08    | 11.12979878 |
| C11orf54     | NM_001286068 | 41.85585918 | 3.36002878  | 0.000463975 | 12.45699425 |
| KDM5C        | NM_004187    | 51.42857143 | 0.843384632 | 2.03E-06    | 60.97878655 |
| C21orf91     | NM_001100421 | 135.0810825 | 2.088682927 | 6.52E-15    | 64.67285233 |
| CDC16        | NM_003903    | 138.4684708 | 1.275292878 | 8.17E-16    | 108.577781  |
| USP34        | NM_014709    | 40.26512274 | 1.354490797 | 0.000180327 | 29.72712907 |
| ZNF92        | NM_001287533 | 112.7541851 | 2.575879642 | 6.18E-12    | 43.77307981 |
| RET          | NM_020975    | 140.5302455 | 0.883745436 | 3.04E-16    | 159.0166576 |
| SMG1         | NM_015092    | 238.4684708 | 1.225112555 | 1.51E-25    | 194.6502547 |
| BMP2K        | NM_198892    | 103.6525111 | 0.712324029 | 8.07E-12    | 145.5131468 |
| SFXN3        | NM_030971    | 81.59073644 | 15.0826181  | 8.80E-05    | 5.40958711  |
| RIF1         | NM_001177663 | 77.20206442 | 1.199503594 | 8.94E-08    | 64.3616783  |
| ANKRD11      | NM_001256182 | 61.85585918 | 3.845915945 | 9.42E-06    | 16.08351822 |
| VKORC1L1     | NM_173517    | 65.71428571 | 1.047300572 | 1.56E-07    | 62.7463476  |
| MTRR         | NM_002454    | 75.87645073 | 0.957624153 | 1.23E-08    | 79.23406115 |
| FAM177A1     | NM_173607    | 149.8970423 | 0.908221933 | 2.83E-18    | 165.0445083 |
| LINC00471    | NR_024079    | 183.6525111 | 5.073006339 | 1.76E-19    | 36.20190846 |
| ENTPD2       | NM_001246    | 81.3256137  | 2.267397576 | 3.74E-09    | 35.86738142 |
| HMG20A       | NM_018200    | 106.7747767 | 0.598144961 | 2.39E-13    | 178.5098656 |
| RELL1        | NM_001085400 | 129.1016741 | 0.97345911  | 5.84E-14    | 132.6215685 |
| ACOX3        | NM_003501    | 61.59073644 | 1.151004099 | 3.69E-06    | 53.51044056 |
| MINK1        | NM_153827    | 173.2844306 | 2.656611574 | 5.42E-18    | 65.22761261 |
| DDAH1        | NM_012137    | 120.7953682 | 0.107399032 | 2.99E-17    | 1124.734236 |
| BECN1        | NM_003766    | 112.4890624 | 1.652888967 | 1.03E-12    | 68.05603077 |
| SLC7A8       | NM_012244    | 121.8558592 | 0.428893885 | 1.20E-16    | 284.1165694 |
| TXLNA        | NM_175852    | 101.3256137 | 8.201306775 | 3.65E-08    | 12.35481326 |
| RFK          | NM_018339    | 157.9382254 | 5.967190273 | 3.39E-15    | 26.46777095 |
| CCAR2        | NR_033902    | 72.75418513 | 4.910602102 | 2.61E-06    | 14.81573616 |
| DDIT4        | NM_019058    | 274.3449216 | 25.3826405  | 8.91E-18    | 10.80836809 |
| GORASP1      | NR_103866    | 75.34620525 | 7.560821759 | 7.43E-06    | 9.965346049 |
| C17orf96     | NM_001130677 | 130.9575332 | 17.25619277 | 2.97E-08    | 7.58901659  |
| TGFBR2       | NM_003242    | 67.30502215 | 2.440177764 | 1.78E-06    | 27.58201601 |
| IQGAP3       | NM_178229    | 58.73359358 | 1.029529009 | 4.10E-06    | 57.04899334 |
| NR2C1        | NM_001032287 | 59.26383906 | 1.740363566 | 6.76E-06    | 34.05256248 |
| SPG11        | NM_025137    | 116.9369417 | 2.28073551  | 1.66E-11    | 51.27159251 |
| COX14        | NM_001257133 | 76.14157347 | 5.603636387 | 1.55E-06    | 13.58788619 |
| ATIC         | NM_004044    | 117.6731026 | 1.915385752 | 1.37E-12    | 61.43571993 |
| LOC100652758 | NM_001278082 | 127.5701449 | 29.44895637 | 2.72E-05    | 4.331907158 |
| CPSF4        | NM_001081559 | 118.9987163 | 7.794759861 | 2.82E-10    | 15.26650191 |
| ERF          | NM_006494    | 146.2445312 | 18.57597843 | 5.32E-09    | 7.872776754 |
| SH3RF2       | NM_152550    | 58.73359358 | 1.349454607 | 1.19E-05    | 43.52394905 |
| RDH13        | NR_027382    | 115.3462052 | 8.22958392  | 7.22E-09    | 14.01604338 |
| RPS15        | NM_001018    | 146.2445312 | 12.45696488 | 2.85E-10    | 11.73998101 |
| RPS6KB2      | NM_003952    | 96.14157347 | 0.335332335 | 1.37E-14    | 286.7053468 |
| ZKSCAN5      | NM_014569    | 52.22393965 | 1.771723242 | 4.25E-05    | 29.47635298 |
| SMOX         | NM_175841    | 127.0398994 | 3.775314538 | 9.80E-12    | 33.65014971 |
| MFSD8        | NM_152778    | 47.03989941 | 2.297760769 | 0.000286281 | 20.47206134 |
| SH3TC1       | NM_018986    | 49.36679679 | 1.27988077  | 9.18E-05    | 38.57140287 |
| ALG1         | NM_019109    | 143.9176338 | 3.36023826  | 2.62E-15    | 42.82959204 |
| HSF2         | NM_004506    | 75.61132799 | 1.14045279  | 5.04E-08    | 66.29939324 |
| PHRF1        | NM_001286583 | 66.24453119 | 4.554381712 | 1.91E-05    | 14.54523037 |
| CCDC107      | NM_174923    | 114.3449216 | 15.75602618 | 4.24E-07    | 7.2572183   |
| ZMYND12      | NM_032257    | 60.79536822 | 0.364832092 | 9.48E-09    | 166.6393103 |
| CENPN        | NM_018455    | 132.4890624 | 8.591664821 | 1.04E-10    | 15.42065073 |
| GAD1         | NM_013445    | 64.97812478 | 2.271674736 | 1.17E-06    | 28.6036217  |
| FGF7         | NM_002009    | 28.83655131 | 0.189951187 | 0.000823879 | 151.8103245 |
| ZMYM2        | NM_001190965 | 100.2651227 | 1.605242459 | 9.62E-10    | 62.46104578 |
| LOC100129518 | NR_037166    | 118.4684708 | 19.30458602 | 2.21E-06    | 6.136804525 |
| RAB5A        | NM_004162    | 120.5302455 | 0.702201436 | 1.09E-14    | 171.6462531 |
| NOMO2        | NM_001004060 | 196.4066962 | 2.104203569 | 4.20E-21    | 93.34015925 |
| NDUFAF1      | NM_016013    | 133.5495533 | 2.005450855 | 2.40E-15    | 66.59328151 |
| PDDC1        | NM_182612    | 105.7142857 | 9.027455757 | 2.14E-08    | 11.71030782 |

|              |              |             |             |             |             |
|--------------|--------------|-------------|-------------|-------------|-------------|
| TMEM18       | NM_152834    | 92.48906239 | 3.572251876 | 2.04E-09    | 25.89096895 |
| ANKRD27      | NM_032139    | 50.69241049 | 1.816191257 | 8.25E-05    | 27.91138339 |
| TMEM120A     | NM_031925    | 66.77477667 | 4.07347958  | 2.96E-06    | 16.39256448 |
| LSM14A       | NM_001114093 | 101.060491  | 1.661958298 | 2.82E-10    | 60.8080787  |
| PTRH2        | NM_016077    | 84.97812478 | 12.38923518 | 1.34E-05    | 6.859029112 |
| POP7         | NM_005837    | 118.4684708 | 5.734507674 | 2.19E-09    | 20.65887389 |
| ALDH2        | NM_000690    | 131.4285714 | 1.365435875 | 1.06E-14    | 96.25393167 |
| GUSBP11      | NR_024448    | 138.2033481 | 2.538793137 | 9.92E-14    | 54.43663214 |
| MIR22HG      | NR_028505    | 80.79536822 | 11.0685009  | 4.79E-05    | 7.299576423 |
| BTBD1        | NM_025238    | 113.0193079 | 2.443974444 | 1.20E-11    | 46.24406288 |
| MBTPS2       | NM_015884    | 100.5302455 | 0.515224775 | 1.83E-13    | 195.119199  |
| STAM-AS1     | NR_110370    | 76.14157347 | 3.096414317 | 5.64E-08    | 24.59024074 |
| COPE         | NM_199442    | 129.8970423 | 1.936552825 | 3.69E-15    | 67.07642601 |
| UNC93B1      | NM_030930    | 72.48906239 | 5.24305528  | 2.23E-06    | 13.82572918 |
| HMCES        | NM_020187    | 123.3873883 | 1.462678468 | 2.20E-14    | 84.35715095 |
| CHRAC1       | NM_017444    | 176.4066962 | 27.51324098 | 8.98E-10    | 6.411701781 |
| ASCC2        | NM_001242906 | 113.2844306 | 2.202609739 | 9.04E-12    | 51.43191215 |
| ZNF148       | NM_021964    | 68.83655131 | 0.398283132 | 4.15E-08    | 172.8332079 |
| SLC18B1      | NM_052831    | 158.9987163 | 1.764136107 | 1.03E-18    | 90.1283726  |
| AHNAK2       | NM_138420    | 57.67310262 | 5.315081344 | 0.000143934 | 10.85084101 |
| FAM83F       | NM_138435    | 98.46847084 | 0.648189798 | 9.44E-12    | 151.9130217 |
| C12orf66     | NM_152440    | 103.6525111 | 1.40580816  | 1.33E-11    | 73.7316186  |
| HIATL2       | NR_002894    | 66.50965393 | 1.06223003  | 1.18E-07    | 62.6132307  |
| ARMC1        | NM_001286702 | 168.6306359 | 1.661775847 | 8.47E-20    | 101.4761624 |
| ZBTB8A       | NR_111980    | 43.91763382 | 1.265801102 | 0.000503255 | 34.69552503 |
| FCHO2        | NM_138782    | 72.48906239 | 0.056683182 | 9.44E-11    | 1278.846022 |
| PRRC1        | NM_130809    | 120.2651227 | 1.324395084 | 1.54E-13    | 90.80758768 |
| HOXA13       | NM_000522    | 37.40797988 | 2.572157362 | 0.001420846 | 14.54342586 |
| MAN2C1       | NM_001256496 | 224.4478793 | 9.500104285 | 1.72E-20    | 23.62583321 |
| CEP68        | NM_015147    | 89.89704227 | 6.187324424 | 1.11E-07    | 14.52922719 |
| TMEM8B       | NM_016446    | 74.81595977 | 2.338478316 | 5.94E-08    | 31.99343747 |
| PDPK1        | NM_031268    | 41.06049096 | 1.070659875 | 0.000114173 | 38.35063955 |
| BIRC5        | NM_001012271 | 114.0797988 | 5.094189578 | 1.23E-10    | 22.39410157 |
| ZNF622       | NM_033414    | 124.1827566 | 3.239916267 | 5.52E-13    | 38.32900184 |
| D2HGDH       | NM_001287249 | 186.2445312 | 2.813694653 | 2.95E-19    | 66.19216162 |
| STEAP3       | NM_001008410 | 176.4006962 | 3.896735523 | 3.01E-17    | 45.27037956 |
| RNF181       | NM_016494    | 92.22393965 | 12.95670138 | 1.60E-05    | 7.117856385 |
| ZNF749       | NM_001023561 | 94.81595977 | 0.610702886 | 1.10E-13    | 155.2571011 |
| SCFD2        | NM_152540    | 27.03989941 | 0.054667166 | 0.003332421 | 494.6277919 |
| SLC25A40     | NM_018843    | 106.5096539 | 0.632352439 | 9.58E-13    | 168.434005  |
| PRR13        | NM_018457    | 135.3462052 | 11.91707486 | 4.06E-10    | 11.35733449 |
| ZNF428       | NM_182498    | 145.773493  | 8.16615987  | 1.30E-12    | 17.85092324 |
| C7orf60      | NM_152556    | 94.81595977 | 0.621722288 | 4.81E-11    | 152.5053253 |
| P4HB         | NM_000918    | 133.2844306 | 7.19752644  | 6.30E-12    | 18.51808836 |
| SHMT1        | NM_004169    | 92.48906239 | 1.791268678 | 1.21E-09    | 51.63327172 |
| ELOVL7       | NM_024930    | 133.2844306 | 1.04203071  | 3.09E-14    | 127.9083517 |
| TMEM126A     | NM_032273    | 78.46847084 | 3.117373947 | 7.36E-08    | 25.17133722 |
| HES2         | NM_019089    | 140.7953682 | 10.20596658 | 3.70E-11    | 13.79539773 |
| SRSF7        | NM_001031684 | 169.6319195 | 14.55118231 | 9.35E-13    | 11.65760389 |
| CXCL1        | NM_001511    | 95.34620525 | 12.99871403 | 1.96E-05    | 7.335049069 |
| FBL          | NM_001436    | 140.2651227 | 6.556468489 | 2.13E-12    | 21.39339539 |
| HDAC11       | NM_001136041 | 77.40797988 | 3.199667898 | 9.09E-08    | 24.19250446 |
| TCEA1        | NM_201437    | 52.22393965 | 1.343770071 | 5.83E-05    | 38.8637467  |
| CA2          | NM_000067    | 95.87645073 | 3.020755642 | 1.45E-09    | 31.73922756 |
| LOC100288069 | NR_033908    | 94.81595977 | 0.315645649 | 2.55E-14    | 300.387349  |
| NDUFS3       | NM_004551    | 164.4478793 | 4.229417143 | 8.41E-18    | 38.8819248  |
| YWHAE        | NR_024058    | 123.9176338 | 3.659572611 | 3.58E-11    | 33.86123108 |
| EPHX1        | NM_001136018 | 55.34620525 | 2.341432948 | 3.06E-05    | 23.6377494  |
| ERI2         | NM_080663    | 147.8352676 | 0.739759903 | 8.50E-20    | 199.8422285 |
| PMS2P1       | NR_003613    | 200.2651227 | 5.027563828 | 1.71E-20    | 39.83343217 |
| FIBP         | NM_004214    | 166.5096539 | 11.8446763  | 3.38E-13    | 14.05776315 |
| HOMER1       | NM_001277077 | 57.67310262 | 0.221822025 | 4.03E-07    | 259.9971878 |
| RAN          | NM_001300796 | 102.8571429 | 8.886693242 | 4.65E-08    | 11.57428754 |
| ZADH2        | NM_175907    | 57.93822536 | 1.597189851 | 2.02E-06    | 36.27510237 |

|               |              |             |             |             |             |
|---------------|--------------|-------------|-------------|-------------|-------------|
| TRAF2         | NM_021138    | 40          | 2.732197597 | 0.001088362 | 14.64022955 |
| WBP5          | NM_016303    | 61.06049096 | 5.037595057 | 0.000106865 | 12.12096055 |
| DYNLT1        | NM_006519    | 109.8970423 | 9.228416753 | 3.25E-08    | 11.90854783 |
| KCTD7         | NM_001167961 | 69.63191953 | 3.425067593 | 2.88E-06    | 20.33008624 |
| ADAM19        | NM_033274    | 81.59073644 | 0.958111101 | 1.68E-09    | 85.15790743 |
| SDR42E1       | NM_145168    | 144.713002  | 1.489995362 | 4.91E-18    | 97.12312247 |
| JMJD6         | NM_015167    | 92.48906239 | 7.272742938 | 3.11E-07    | 12.71721869 |
| CRTAP         | NM_006371    | 114.550837  | 2.006311171 | 2.44E-12    | 57.09524958 |
| YIF1B         | NM_001145463 | 63.1222656  | 14.69080402 | 0.003987591 | 4.296719602 |
| ACOXL         | NM_001142807 | 106.5096539 | 0.328766649 | 6.46E-12    | 323.967331  |
| PARP3         | NM_005485    | 107.0398994 | 6.72056109  | 3.01E-09    | 15.92722661 |
| PIP5K1A       | NM_003557    | 132.4890624 | 2.671901942 | 1.73E-13    | 49.58604967 |
| CDC7          | NM_003503    | 122.1209819 | 2.432401014 | 1.45E-13    | 50.20594104 |
| LACTB2        | NM_016027    | 186.7747767 | 0.333391995 | 1.78E-27    | 560.2257389 |
| ABI2          | NM_001282925 | 104.9781248 | 0.808546992 | 2.65E-12    | 129.835527  |
| PCM1          | NM_006197    | 81.59073644 | 0.749887543 | 1.29E-09    | 108.8039629 |
| UIMC1         | NM_001199297 | 129.1016741 | 0.958752647 | 7.19E-15    | 134.6558724 |
| CSK           | NM_004383    | 60.26512274 | 1.931827593 | 3.18E-06    | 31.19591155 |
| CBLC          | NM_001130852 | 117.7323099 | 6.602506928 | 6.12E-10    | 17.83145572 |
| LOC101929099  | NR_110786    | 35.08108251 | 0.320320387 | 0.000117095 | 109.5187316 |
| IL17RA        | NM_001289905 | 104.1827566 | 4.186149671 | 2.21E-09    | 24.88748964 |
| LOXL2         | NM_002318    | 111.9588169 | 0.620627924 | 2.67E-13    | 180.3960353 |
| DFNB59        | NM_001042702 | 81.59073644 | 0.706471556 | 1.51E-11    | 115.4904762 |
| YIF1A         | NM_020470    | 126.7747767 | 7.471785009 | 9.92E-11    | 16.96713389 |
| WIBG          | NM_001143853 | 66.50965393 | 0.956314044 | 2.34E-07    | 69.54792137 |
| HNRNPD        | NM_031369    | 74.07979883 | 3.797160653 | 1.31E-06    | 19.50926116 |
| CFAP61        | NM_015585    | 25.24324752 | 0.028961006 | 0.001596169 | 871.6288265 |
| RPL23AP7      | NR_024528    | 101.5907364 | 1.658226743 | 2.41E-12    | 61.26468341 |
| NDUFAF7       | NM_144736    | 109.8970423 | 2.493492887 | 3.09E-11    | 44.0735335  |
| CGGBP1        | NM_001008390 | 124.1827566 | 2.642341219 | 6.60E-14    | 46.99724458 |
| KBTBD2        | NM_015483    | 83.1222656  | 3.494411071 | 1.65E-07    | 23.78720303 |
| ZSWIM8        | NM_015037    | 52.48906239 | 6.207500897 | 0.001398203 | 8.455747853 |
| LOC100294362  | NR_029376    | 99.26383906 | 0.239116263 | 2.90E-14    | 415.1279286 |
| OSGEP         | NM_017807    | 67.30502215 | 7.684245513 | 7.78E-05    | 8.758832866 |
| SYNJ2BP-COX16 | NM_001202547 | 83.38738834 | 1.700110788 | 4.60E-08    | 49.04820847 |
| H2AFJ         | NM_177925    | 78.2033481  | 2.885240154 | 2.96E-08    | 27.10462351 |
| THRB          | NM_000461    | 61.59073644 | 0.165398024 | 2.18E-07    | 372.3789142 |
| MED21         | NM_001271811 | 95.61132799 | 1.452390036 | 1.44E-11    | 65.83033871 |
| RHBDD3        | NM_012265    | 95.87645073 | 13.04393389 | 3.10E-06    | 7.350271134 |
| DPP9          | NM_139159    | 67.30502215 | 3.325229245 | 1.51E-06    | 20.24071641 |
| TMEM39B       | NM_018056    | 166.7747767 | 0.089442381 | 2.41E-27    | 1864.605734 |
| ARL6          | NM_177976    | 31.22265597 | 0.522654074 | 0.000487769 | 59.73866376 |
| TUBGCP3       | NM_001286277 | 132.7541851 | 1.264012729 | 1.57E-13    | 105.0259875 |
| DUSP1         | NM_004417    | 226.7747767 | 17.71665081 | 1.02E-16    | 12.80009293 |
| UBAP2         | NM_001282529 | 156.1415735 | 2.18204463  | 1.41E-15    | 71.55746097 |
| TCF7L1        | NM_031283    | 43.1222656  | 1.776520374 | 0.000714246 | 24.27344275 |
| WNT7B         | NM_058238    | 97.93822536 | 1.130739564 | 2.58E-10    | 86.61430846 |
| RCC2          | NM_001136204 | 63.65251108 | 2.30555148  | 3.17E-06    | 27.60836686 |
| DSG2          | NM_001943    | 105.7142857 | 1.637137002 | 4.63E-11    | 64.57265677 |
| STAT1         | NM_007315    | 141.8558592 | 3.392391107 | 1.48E-13    | 41.81589172 |
| GALK2         | NM_001289030 | 69.63191953 | 0.13324235  | 4.75E-09    | 522.5960048 |
| SNAP47        | NM_053052    | 158.4684708 | 2.536881127 | 1.26E-16    | 62.46586376 |
| MAST2         | NM_015112    | 71.69369417 | 0.367169412 | 3.17E-08    | 195.2605306 |
| AGTRAP        | NM_001040195 | 103.9176338 | 6.582978772 | 8.89E-09    | 15.78580722 |
| VANGL1        | NM_001172411 | 111.9588169 | 1.453924192 | 9.30E-12    | 77.00457664 |
| SNF8          | NM_007241    | 153.0193079 | 14.12590348 | 3.09E-11    | 10.83253245 |
| USP20         | NM_006676    | 63.91763382 | 1.43359896  | 2.85E-06    | 44.5854354  |
| CDKL1         | NM_001282236 | 33.28443061 | 1.677044978 | 0.004012704 | 19.84707091 |
| STRADB        | NM_001206864 | 115.611328  | 0.245673569 | 9.53E-17    | 470.5891987 |
| XRCC5         | NM_021141    | 84.4478793  | 2.399161958 | 3.23E-08    | 35.19890728 |
| PIAS1         | NM_016166    | 55.34620525 | 1.62546455  | 4.97E-05    | 34.04946927 |
| SLC50A1       | NM_001122837 | 198.9987163 | 28.15725564 | 3.65E-11    | 7.06740454  |
| DCTN5         | NM_001199743 | 75.87645073 | 3.596023195 | 1.03E-06    | 21.10010047 |
| DSCC1         | NM_024094    | 162.1209819 | 4.608391498 | 1.95E-16    | 35.17951589 |

|              |              |             |             |             |             |
|--------------|--------------|-------------|-------------|-------------|-------------|
| PTBP3        | NM_001244898 | 60.79536822 | 0.922279216 | 8.11E-07    | 65.91861466 |
| CILP2        | NM_153221    | 97.67310262 | 8.254921065 | 9.68E-08    | 11.83210619 |
| PAQR8        | NM_133367    | 160.7953682 | 2.349130467 | 4.12E-17    | 68.448888   |
| SENPI        | NR_051992    | 104.4478793 | 0.731996274 | 4.32E-13    | 142.689086  |
| NUDT9        | NM_001248011 | 60.79536822 | 2.002583647 | 6.59E-06    | 30.35846634 |
| OPTN         | NM_001008212 | 75.61132799 | 1.400375672 | 9.74E-08    | 53.99360292 |
| SNHG16       | NR_038111    | 136.9369417 | 12.78911005 | 2.42E-10    | 10.7073081  |
| WIP1         | NM_017983    | 131.9588169 | 3.442060961 | 1.60E-12    | 38.33715277 |
| CDC42EP4     | NM_012121    | 181.060491  | 8.816287139 | 4.25E-15    | 20.5370456  |
| KAT2B        | NM_003884    | 60.79536822 | 1.17044934  | 9.58E-07    | 51.94190482 |
| DNAJC11      | NM_018198    | 57.93822536 | 1.413713039 | 1.68E-05    | 40.9830169  |
| TBC1D15      | NM_022771    | 100.7953682 | 0.187055456 | 3.86E-14    | 538.8528631 |
| ZNF75D       | NM_007131    | 30.16216501 | 0.891907164 | 0.000953963 | 33.81760593 |
| PRPS2        | NM_002765    | 69.36679679 | 1.998788216 | 6.25E-07    | 34.70442553 |
| CD164L2      | NM_207397    | 66.50965393 | 5.205894884 | 2.87E-05    | 12.77583497 |
| CHCHD1       | NM_203298    | 97.93822536 | 8.149060326 | 1.42E-06    | 12.01834585 |
| MRPL19       | NM_014763    | 61.06049096 | 2.49339738  | 2.95E-06    | 24.48887267 |
| UPF1         | NM_002911    | 172.2239396 | 2.266483273 | 4.93E-19    | 75.98729791 |
| COL4A4       | NM_000092    | 50.42728775 | 1.478127605 | 9.83E-05    | 34.11565252 |
| GCLC         | NM_001197115 | 138.9987163 | 1.958963667 | 5.85E-15    | 70.95522938 |
| ZNF503-AS2   | NR_110302    | 49.36679679 | 9.017587095 | 0.004601697 | 5.474501801 |
| UBL3         | NM_007106    | 95.08108251 | 0.443142915 | 7.53E-12    | 214.5607643 |
| FLYWCH1      | NM_032296    | 109.1016741 | 3.03472535  | 4.71E-11    | 35.95108666 |
| ELMOD3       | NM_001135023 | 63.38738834 | 2.850794578 | 4.44E-06    | 22.23498979 |
| HEXDC        | NM_173620    | 203.6525111 | 6.189881148 | 3.04E-19    | 32.90087583 |
| HUWE1        | NM_031407    | 108.8365513 | 1.545275733 | 1.37E-10    | 70.43179998 |
| RGCC         | NM_014059    | 83.65251108 | 3.099700166 | 4.36E-08    | 26.98729122 |
| TMEM185A     | NM_001282302 | 63.1222656  | 1.302145377 | 1.21E-06    | 48.47559015 |
| MYH14        | NM_001077186 | 95.34620525 | 0.957593714 | 8.96E-11    | 99.56853706 |
| N4BP1        | NM_153029    | 51.69369417 | 0.730475442 | 4.21E-06    | 70.76718968 |
| DSC3         | NM_024423    | 35.61132799 | 0.595748609 | 0.000333882 | 59.77576353 |
| MBD2         | NM_015832    | 63.1222656  | 2.652098802 | 2.44E-06    | 23.80087256 |
| IPO7         | NM_006391    | 107.0398994 | 3.17385816  | 2.26E-10    | 33.725483   |
| SGSH         | NM_000199    | 132.7541851 | 4.087695477 | 3.52E-13    | 32.47653498 |
| PRORS1P      | NR_027258    | 72.75418513 | 4.2919288   | 2.50E-06    | 16.9513961  |
| PEX16        | NM_004813    | 92.22393965 | 4.252046883 | 1.67E-08    | 21.68930451 |
| COX7A2       | NR_029466    | 89.10167405 | 7.619900734 | 3.62E-07    | 11.69328541 |
| AKAP11       | NM_016248    | 60.79536822 | 1.180654255 | 5.37E-06    | 51.49294805 |
| ZNF488       | NM_153034    | 95.87645073 | 0.975990495 | 3.55E-12    | 98.23502506 |
| ZNF564       | NM_144976    | 152.4890624 | 1.189537726 | 7.49E-19    | 128.1918674 |
| SMYD4        | NM_052928    | 226.5096539 | 1.354125571 | 1.31E-26    | 167.2737438 |
| KIF23        | NM_004856    | 59.26383906 | 2.494583417 | 7.56E-06    | 23.75700835 |
| ATG16L1      | NM_001190266 | 80.79536822 | 2.669283198 | 6.90E-08    | 30.26856359 |
| NRGN         | NM_006176    | 71.95881691 | 8.838340052 | 4.20E-05    | 8.141666476 |
| THOC1        | NM_005131    | 61.3256137  | 1.098379358 | 5.16E-06    | 55.83281703 |
| LOC101928784 | NR_120339    | 90.16216501 | 0.441992436 | 3.25E-12    | 203.9902894 |
| QARS         | NM_005051    | 86.24453119 | 6.186620447 | 2.34E-07    | 13.94049173 |
| CRIP1        | NM_014171    | 57.93822536 | 0.374998681 | 9.30E-08    | 154.5024778 |
| DNASE2       | NM_001375    | 115.611328  | 6.223413339 | 1.72E-10    | 18.57683584 |
| TMX3         | NM_019022    | 78.2033481  | 0.753811298 | 8.48E-10    | 103.7439321 |
| CNOT2        | NM_001199303 | 46.24453119 | 0.222273643 | 9.19E-06    | 208.0522482 |
| TTC19        | NM_017775    | 133.0193079 | 4.616721202 | 9.93E-13    | 28.81250611 |
| SRSF5        | NM_001039465 | 147.8352676 | 12.41254513 | 4.46E-11    | 11.91014946 |
| COQ2         | NM_015697    | 106.7747767 | 1.892370397 | 4.72E-12    | 56.42382528 |
| DVL2         | NM_004422    | 152.7541851 | 7.042452576 | 4.43E-14    | 21.69048119 |
| CEP83        | NM_001042399 | 113.0193079 | 0.303013052 | 3.22E-14    | 372.984949  |
| CENPBD1      | NM_145039    | 181.3256137 | 6.076591751 | 1.70E-17    | 29.84001907 |
| RAB7A        | NM_004637    | 132.2239396 | 1.775611368 | 2.48E-13    | 74.46671159 |
| KLHL25       | NM_022480    | 78.73359358 | 2.230630609 | 4.07E-08    | 35.2965629  |
| ZBTB10       | NM_023929    | 69.89704227 | 2.083142896 | 8.46E-07    | 33.55364742 |
| WDR78        | NM_207014    | 60.79536822 | 0.247659118 | 8.58E-08    | 245.4800319 |
| ITPRIPL2     | NM_001034841 | 100.7953682 | 9.078910569 | 2.11E-07    | 11.10214353 |
| STARD8       | NM_014725    | 55.34620525 | 0.340958228 | 7.63E-07    | 162.3254719 |
| KIAA1467     | NM_020853    | 69.63191953 | 1.361369018 | 4.65E-07    | 51.14845322 |

|            |              |             |             |             |             |
|------------|--------------|-------------|-------------|-------------|-------------|
| IKBKAP     | NM_003640    | 61.3256137  | 1.410669893 | 8.21E-06    | 43.47268912 |
| SLC25A25   | NM_001006641 | 132.2239396 | 2.733384839 | 1.03E-13    | 48.37370053 |
| ZNF292     | NM_015021    | 87.83526763 | 0.593381192 | 1.69E-10    | 148.025028  |
| PTTG1      | NM_001282383 | 89.63191953 | 1.858747756 | 1.49E-10    | 48.22166925 |
| PDK1       | NR_103729    | 73.01930787 | 1.607878103 | 1.50E-07    | 45.41345996 |
| OPA1       | NM_130834    | 116.9369417 | 0.582681925 | 3.92E-14    | 200.6874362 |
| MKRN2      | NM_001271707 | 232.2239396 | 2.416431406 | 2.51E-26    | 96.10202013 |
| CD55       | NR_125349    | 49.36679679 | 1.049573637 | 7.27E-05    | 47.03509603 |
| ACVR1B     | NM_020328    | 52.75418513 | 1.700354688 | 5.94E-05    | 31.02540046 |
| GSTT2      | NM_000854    | 241.5907364 | 37.63971644 | 8.38E-13    | 6.418505752 |
| HBS1L      | NM_001145158 | 86.50965393 | 0.728149726 | 4.45E-10    | 118.8075074 |
| C1orf53    | NM_001024594 | 107.3050222 | 14.2915022  | 3.63E-07    | 7.508309528 |
| ADK        | NM_001123    | 118.2033481 | 0.100520746 | 2.52E-14    | 1175.909982 |
| TXNRD2     | NM_006440    | 97.93822536 | 1.037534438 | 3.10E-10    | 94.39515623 |
| NR2C2      | NM_001291694 | 35.34620525 | 1.840720276 | 0.004409316 | 19.2023773  |
| STYXL1     | NM_016086    | 126.7747767 | 3.506984001 | 1.47E-11    | 36.14923155 |
| FADS2      | NM_001281502 | 53.28443061 | 3.098798702 | 4.41E-05    | 17.1951894  |
| GPATCH2    | NM_018040    | 166.7747767 | 0.09243453  | 5.82E-24    | 1804.247571 |
| CCNDBP1    | NR_045999    | 94.55083703 | 4.068218454 | 2.48E-09    | 23.24133723 |
| PNN        | NM_002687    | 101.3256137 | 8.328821812 | 4.26E-08    | 12.16565992 |
| PUS7       | NM_019042    | 220.5302455 | 2.143271645 | 1.17E-23    | 102.8942113 |
| KIAA1715   | NM_030650    | 186.5096539 | 0.556683043 | 2.50E-24    | 335.0374259 |
| SLC25A27   | NM_004277    | 75.87645073 | 2.261722578 | 4.90E-08    | 33.54808033 |
| NOC3L      | NM_022451    | 103.9176338 | 0.595974135 | 5.04E-13    | 174.3660131 |
| EFTUD2     | NM_001258353 | 70.69241049 | 1.55854004  | 3.63E-07    | 45.35809711 |
| DNAJC9-AS1 | NR_038373    | 146.2445312 | 8.167141609 | 1.67E-12    | 17.90645224 |
| ZNF121     | NM_001008727 | 130.4272878 | 1.467565022 | 2.48E-16    | 88.87325999 |
| DDX19A     | NM_018332    | 82.6512274  | 2.321947929 | 1.20E-08    | 35.59564208 |
| CLTB       | NR_045724    | 73.54955335 | 0.621788124 | 4.27E-09    | 118.2871633 |
| URB1       | NM_014825    | 126.7747767 | 3.046754847 | 2.35E-12    | 41.60977271 |
| TIMM23B    | NM_001290117 | 112.2239396 | 1.318560021 | 7.49E-12    | 85.11098311 |
| NSMCE2     | NM_173685    | 72.48906239 | 0.864272497 | 7.72E-08    | 83.87292507 |
| ARMC9      | NM_001291656 | 81.85585918 | 0.388736134 | 6.71E-10    | 210.5692065 |
| NR6A1      | NM_001489    | 123.1222656 | 1.61661362  | 8.11E-12    | 76.16060143 |
| CYTH3      | NM_004227    | 45.71428571 | 0.930310797 | 3.16E-05    | 49.13872426 |
| SUPT7L     | NM_001282730 | 191.9588169 | 2.421345604 | 1.76E-22    | 79.27774399 |
| NMRAL1     | NM_020677    | 67.83526763 | 9.443155638 | 0.000144962 | 7.183538028 |
| RPS24      | NM_001142284 | 93.28443061 | 13.0311853  | 4.69E-06    | 7.158553001 |
| MED22      | NM_181491    | 69.36679679 | 11.50473957 | 0.00033514  | 6.029410431 |
| SUZ12      | NM_015355    | 112.4890624 | 2.062021738 | 2.78E-11    | 54.55280142 |
| DHX36      | NM_001114397 | 67.03989941 | 1.164643424 | 1.12E-06    | 57.56259643 |
| CD274      | NM_001267706 | 70.42728775 | 0.626037537 | 5.74E-09    | 112.4969089 |
| RBM12      | NM_006047    | 146.5096539 | 6.131522411 | 1.54E-13    | 23.89449864 |
| ITGA7      | NM_001144996 | 29.36679679 | 0.525162557 | 0.000823879 | 55.91944129 |
| C11orf30   | NM_001300943 | 52.75418513 | 0.354963591 | 2.95E-06    | 148.6185807 |
| ZNF507     | NM_001136156 | 59.26383906 | 0.672090704 | 1.40E-07    | 88.17833467 |
| NOL8       | NM_017948    | 153.8146761 | 3.93544471  | 2.88E-15    | 39.08444596 |
| CENPE      | NM_001286734 | 96.67181894 | 0.431970587 | 3.71E-12    | 223.7925958 |
| IARS       | NM_013417    | 75.34620525 | 2.206899524 | 4.19E-07    | 34.14120328 |
| CDADC1     | NR_036439    | 109.1016741 | 0.328444993 | 1.34E-15    | 332.1763963 |
| DERL1      | NM_024295    | 88.10039037 | 0.615691805 | 6.36E-11    | 143.0917055 |
| YPEL2      | NM_001005404 | 49.10167405 | 1.530560669 | 0.000143555 | 32.08084139 |
| IER5       | NM_016545    | 135.0810825 | 19.53776665 | 1.77E-07    | 6.913844604 |
| NTPCR      | NM_032324    | 47.30502215 | 0.335783681 | 6.04E-07    | 140.8794556 |
| TMEM132A   | NM_017870    | 109.3667968 | 2.639298037 | 1.16E-11    | 41.43783508 |
| WDYHV1     | NM_001283027 | 157.9382254 | 2.12089838  | 3.10E-18    | 74.46760619 |
| ABHD14A    | NM_015407    | 160.7953682 | 5.611077958 | 7.43E-16    | 28.6567696  |
| TRDMT1     | NM_004412    | 51.95881691 | 2.347495834 | 8.18E-05    | 22.1337206  |
| CREB1      | NM_134442    | 188.8365513 | 1.312683748 | 1.08E-20    | 143.8553281 |
| TRAPPC2L   | NM_016209    | 144.1827566 | 3.939080556 | 1.01E-14    | 36.60315003 |
| SESN2      | NM_031459    | 163.9176338 | 2.615186062 | 1.49E-17    | 62.67914785 |
| PKMYT1     | NM_182687    | 104.1827566 | 14.70689477 | 3.35E-06    | 7.083939758 |
| MISP       | NM_173481    | 89.63191953 | 3.101223108 | 8.12E-09    | 28.90211907 |
| GPR160     | NM_014373    | 83.65251108 | 1.022543768 | 7.25E-09    | 81.80824499 |

|              |              |             |             |             |             |
|--------------|--------------|-------------|-------------|-------------|-------------|
| LOC101927221 | NR_125415    | 173.2844306 | 3.257329054 | 4.58E-19    | 53.19831916 |
| URM1         | NM_001135947 | 94.81595977 | 1.530566372 | 6.97E-11    | 61.94828365 |
| RAB30-AS1    | NR_038903    | 104.1827566 | 7.858454905 | 2.70E-07    | 13.25740973 |
| NR2C2AP      | NM_176880    | 92.48906239 | 10.60944762 | 3.07E-06    | 8.717613365 |
| ATXN2L       | NM_145714    | 69.36679679 | 8.842699123 | 0.00014574  | 7.844527539 |
| FZD6         | NM_001164616 | 78.46847084 | 1.078572987 | 1.94E-08    | 72.75211953 |
| AGGF1        | NM_018046    | 78.46847084 | 0.814718417 | 1.03E-08    | 96.3136087  |
| MTX1         | NM_198883    | 58.2033481  | 8.313605537 | 0.00068545  | 7.00097543  |
| RBL2         | NM_005611    | 55.61132799 | 0.52942277  | 9.06E-07    | 105.041436  |
| CAPZA1       | NM_006135    | 83.38738834 | 1.631579657 | 2.15E-08    | 51.10837707 |
| ATP6V0A1     | NM_001130020 | 129.8970423 | 3.128578832 | 8.09E-13    | 41.5195043  |
| LOC729970    | NR_033998    | 29.36679679 | 1.005013554 | 0.001720332 | 29.22029926 |
| CHRNB1       | NM_000747    | 47.30502215 | 7.019969809 | 0.002385332 | 6.738636125 |
| CTH          | NM_001190463 | 101.060491  | 1.69277189  | 5.14E-11    | 59.70118688 |
| TCTEX1D2     | NM_152773    | 112.2239396 | 1.972260033 | 2.57E-12    | 56.90118837 |
| VWA3B        | NM_144992    | 40.53024548 | 0.438633331 | 0.00013333  | 92.40119839 |
| TELO2        | NM_016111    | 117.9382254 | 0.922610896 | 2.04E-15    | 127.8309479 |
| PLA2G4A      | NM_024420    | 54.81595977 | 0.131955562 | 4.85E-07    | 415.4122712 |
| PRRT3-AS1    | NR_046734    | 81.06049096 | 1.142695183 | 7.27E-10    | 70.93798257 |
| LOC374443    | NR_002814    | 66.50965393 | 1.651906743 | 1.03E-07    | 40.26235392 |
| OAS3         | NM_006187    | 78.46847084 | 0.399865516 | 7.41E-11    | 196.2371542 |
| FIRRE        | NR_026975    | 35.34620525 | 0.187112086 | 0.000266886 | 188.9039129 |
| ARRDC3-AS1   | NR_027435    | 68.10039037 | 4.426328176 | 1.05E-05    | 15.38530079 |
| LYPD6        | NM_001195685 | 132.7541851 | 1.153631937 | 2.80E-13    | 115.0749913 |
| SLC25A42     | NM_178526    | 52.22393965 | 1.427916661 | 5.55E-05    | 36.57352077 |
| MRPL38       | NM_032478    | 95.61132799 | 10.16714632 | 7.47E-07    | 9.403949251 |
| PTPLA        | NM_014241    | 159.2638391 | 0.660518462 | 1.03E-21    | 241.119436  |
| ZNF565       | NM_152477    | 70.69241049 | 0.96617087  | 7.45E-08    | 73.167607   |
| ATP6V0A2     | NM_012463    | 122.1209819 | 1.420108904 | 2.51E-13    | 85.99409635 |
| VCAN         | NM_001126336 | 29.89704227 | 0.900763553 | 0.002400129 | 33.19077706 |
| DENND5B-AS1  | NR_046909    | 61.06049096 | 1.695752017 | 3.52E-06    | 36.00791292 |
| LTBR         | NM_002342    | 97.93822536 | 10.16980141 | 5.12E-07    | 9.630298702 |
| PRDM1        | NM_001198    | 58.99871632 | 0.708776812 | 6.50E-07    | 83.24018974 |
| ZBED3-AS1    | NR_024398    | 82.12098192 | 0.714568843 | 3.69E-10    | 114.9238211 |
| PTK6         | NM_001256358 | 129.1016741 | 8.853668876 | 2.43E-10    | 14.58171475 |
| RPL12        | NM_000976    | 181.8558592 | 44.69255494 | 2.32E-07    | 4.069041464 |
| RAB35        | NM_006861    | 61.06049096 | 1.007319246 | 1.12E-06    | 60.61682153 |
| CYB561       | NM_001017916 | 84.4478793  | 5.437981624 | 4.02E-07    | 15.52926897 |
| SLC35D1      | NM_015139    | 110.162165  | 1.544076378 | 1.05E-11    | 71.34502319 |
| ARPIN        | NM_182616    | 50.16216501 | 4.929532414 | 0.000328766 | 10.17584647 |
| MAP7D1       | NM_018067    | 46.77477667 | 4.538549171 | 0.00138146  | 10.30610773 |
| HOXA11       | NM_005523    | 74.81595977 | 15.67385656 | 0.000585034 | 4.773296186 |
| SFXN4        | NM_213649    | 183.9176338 | 3.809887717 | 5.72E-19    | 48.27376749 |
| PRDM4        | NM_012406    | 71.69369417 | 2.245796187 | 2.79E-07    | 31.92350873 |
| FAM173B      | NR_047668    | 129.1016741 | 2.348900738 | 2.28E-14    | 54.9625925  |
| PEX7         | NM_000288    | 106.5096539 | 0.299503813 | 5.41E-14    | 355.6203601 |
| MYO1B        | NM_012223    | 138.2033481 | 0.434365017 | 2.94E-16    | 318.1732936 |
| PSMG1        | NM_001261824 | 169.6319195 | 2.045237064 | 4.46E-21    | 82.9399792  |
| MRPL11       | NM_016050    | 55.34620525 | 6.592946812 | 0.000709389 | 8.394759859 |
| POU2F1       | NR_037163    | 65.97940845 | 0.448146878 | 1.59E-07    | 147.2271964 |
| GTF2IRD2B    | NM_001003795 | 97.67310262 | 2.907121671 | 1.46E-09    | 33.59787229 |
| HNRNPK       | NM_031262    | 101.060491  | 6.763182647 | 1.39E-08    | 14.94274164 |
| PHAX         | NM_032177    | 69.63191953 | 0.091174978 | 6.66E-12    | 763.717428  |
| LEMD2        | NM_181336    | 129.3667968 | 5.303432718 | 1.22E-11    | 24.39303064 |
| WNT10B       | NM_003394    | 101.5907364 | 1.803976882 | 6.06E-12    | 56.31487713 |
| TMEM87B      | NM_032824    | 103.6525111 | 1.353986848 | 1.09E-10    | 76.55355827 |
| KLHL8        | NM_001292007 | 197.4079799 | 0.618259806 | 6.97E-25    | 319.2961567 |
| RPL27A       | NM_000990    | 209.6319195 | 41.30815495 | 5.50E-10    | 5.074831344 |
| INTS7        | NM_001199812 | 63.91763382 | 0.334031566 | 7.57E-08    | 191.3520766 |
| SUPT20H      | NM_001014286 | 158.2033481 | 1.142963421 | 4.64E-18    | 138.415058  |
| STAT2        | NM_005419    | 63.91763382 | 4.008679616 | 2.07E-05    | 15.94480975 |
| TSC2         | NM_001114382 | 118.7335936 | 0.358196316 | 1.46E-17    | 331.4763114 |
| SMG7         | NM_201569    | 54.55083703 | 0.853062626 | 2.58E-06    | 63.94704842 |
| WRAP73       | NM_017818    | 120.7953682 | 0.197216255 | 8.81E-19    | 612.502089  |

|              |              |             |             |             |             |
|--------------|--------------|-------------|-------------|-------------|-------------|
| RAB6A        | NM_002869    | 151.9588169 | 1.656738439 | 1.10E-15    | 91.72167029 |
| C5orf34      | NM_198566    | 67.03989941 | 0.812890959 | 2.13E-07    | 82.47096202 |
| ABTB1        | NM_172027    | 52.75418513 | 2.767858467 | 8.43E-05    | 19.05956744 |
| FAM126B      | NM_173822    | 58.73359358 | 0.123183334 | 2.02E-08    | 476.7982142 |
| AIDA         | NM_022831    | 63.1222656  | 2.300071119 | 4.33E-06    | 27.44361471 |
| WDR5B        | NM_019069    | 121.3256137 | 6.227636052 | 2.95E-11    | 19.48180862 |
| UCHL5        | NM_001199263 | 164.713002  | 2.219418171 | 3.99E-18    | 74.21449649 |
| TRIM65       | NM_173547    | 175.8764507 | 13.97891874 | 1.02E-13    | 12.58154897 |
| CLTA         | NM_001184762 | 130.4272878 | 3.155137566 | 2.15E-13    | 41.33806688 |
| NUDT7        | NM_001243657 | 115.0810825 | 1.875752347 | 2.77E-13    | 61.35195975 |
| NDE1         | NM_001143979 | 90.16216501 | 4.113420466 | 8.80E-08    | 21.91902475 |
| RASSF3       | NR_040718    | 118.2033481 | 2.789488294 | 1.78E-11    | 42.37456324 |
| POLRIE       | NM_022490    | 104.4478793 | 3.313348598 | 1.82E-10    | 31.52335959 |
| RABGEF1      | NM_014504    | 166.7747767 | 1.894097885 | 2.13E-17    | 88.0497138  |
| FTH1         | NM_002032    | 124.5662939 | 23.44832935 | 2.35E-06    | 5.312373944 |
| PRPSAP2      | NM_001243941 | 43.38738834 | 0.833555805 | 4.95E-05    | 52.05097018 |
| CA5BP1       | NR_026551    | 71.42857143 | 1.825209999 | 1.99E-07    | 39.13444012 |
| PRR15        | NM_175887    | 50.69241049 | 8.447645816 | 0.001700384 | 6.000773659 |
| ZNF587       | NM_001204817 | 39.26383906 | 1.215107783 | 0.000319591 | 32.31305043 |
| ANKH         | NM_054027    | 34.81595977 | 1.58140247  | 0.004590296 | 22.01587542 |
| ATP5A1       | NM_004046    | 118.7335936 | 4.628866823 | 3.74E-11    | 25.65068258 |
| ANP32E       | NM_001280559 | 52.75418513 | 3.181258203 | 4.63E-05    | 16.58280522 |
| DPY30        | NM_032574    | 123.1222656 | 0.799195754 | 5.70E-17    | 154.0577073 |
| CDK19        | NM_015076    | 91.95881691 | 0.443110029 | 1.57E-10    | 207.5304348 |
| MTCH1        | NM_014341    | 178.4684708 | 8.829238584 | 2.31E-15    | 20.21334786 |
| SIRT5        | NM_012241    | 118.9987163 | 2.987747602 | 2.55E-12    | 39.8289053  |
| CTNNAL1      | NM_003798    | 145.7142857 | 1.277580324 | 1.07E-15    | 114.0548919 |
| FAM171B      | NM_177454    | 129.8970423 | 0.558738327 | 1.77E-16    | 232.4827848 |
| HTR7         | NM_019860    | 54.81595977 | 1.404618771 | 4.49E-05    | 39.02550707 |
| ZYX          | NM_003461    | 80.26512274 | 10.41198527 | 1.02E-05    | 7.708916277 |
| CCDC58       | NM_001017928 | 52.22393965 | 1.858047095 | 3.58E-05    | 28.10689771 |
| ZC3H13       | NM_015070    | 78.99871632 | 0.719239148 | 1.98E-09    | 109.8365079 |
| TMEM14C      | NM_016462    | 93.01930787 | 6.650207883 | 1.19E-07    | 13.98742859 |
| SEMA7A       | NM_001146030 | 63.65251108 | 3.354043952 | 3.52E-06    | 18.97784048 |
| ITSN1        | NM_001001132 | 123.6525111 | 0.362653472 | 1.28E-14    | 340.9660198 |
| NOC2L        | NM_015658    | 61.3256137  | 3.237972498 | 2.64E-05    | 18.93951037 |
| PNISR        | NM_032870    | 95.87645073 | 1.639061846 | 7.32E-11    | 58.49471205 |
| ERCC4        | NM_005236    | 84.71300204 | 1.273766155 | 2.16E-09    | 66.50592943 |
| BLOC1S1      | NR_037657    | 60.79536822 | 3.207093816 | 8.07E-06    | 18.9565294  |
| CMAS         | NM_018686    | 126.7747767 | 1.581693378 | 2.85E-15    | 80.15129759 |
| CCDC142      | NM_032779    | 69.63191953 | 7.723411988 | 2.66E-05    | 9.015694053 |
| IRAK1BP1     | NM_001010844 | 66.24453119 | 1.998618433 | 1.35E-06    | 33.14516173 |
| PI4KB        | NM_001198773 | 72.22393965 | 4.073108035 | 4.81E-06    | 17.73189884 |
| MRPL20       | NM_017971    | 118.9987163 | 14.57251857 | 3.45E-08    | 8.165967724 |
| CHAMP1       | NM_001164145 | 172.4890624 | 2.493969782 | 1.66E-20    | 69.1624508  |
| SMARCA1      | NM_001282875 | 41.06049096 | 0.463734989 | 7.29E-05    | 88.54300825 |
| SLC6A6       | NR_103507    | 69.63191953 | 2.239456733 | 1.69E-06    | 31.0932194  |
| PTMS         | NM_002824    | 131.4285714 | 16.70658453 | 2.51E-08    | 7.866872562 |
| COA7         | NM_023077    | 109.3667968 | 3.464674379 | 2.62E-11    | 31.56625553 |
| PHF3         | NM_001290259 | 95.61132799 | 1.064879889 | 1.05E-09    | 89.78602088 |
| LOC100996255 | NR_102756    | 143.3873883 | 0.031299727 | 3.40E-26    | 4581.106672 |
| DOCK11       | NM_144658    | 31.95881691 | 0.643675614 | 0.001227255 | 49.65050131 |
| METTL17      | NM_022734    | 69.36679679 | 4.433906501 | 7.15E-06    | 15.64462326 |
| EMC9         | NM_016049    | 206.7747767 | 21.78140459 | 3.08E-13    | 9.493179187 |
| VAMP7        | NR_033714    | 112.4890624 | 2.071593045 | 2.70E-11    | 54.30075306 |
| ADAR         | NM_015840    | 67.57014489 | 2.380134278 | 5.86E-07    | 28.38921548 |
| SPAG9        | NM_001130527 | 76.40669621 | 1.354889103 | 2.34E-07    | 56.39332109 |
| FAM212B      | NM_019099    | 182.3861047 | 5.071979278 | 4.40E-18    | 35.95955241 |
| CBFB         | NM_001755    | 68.83655131 | 0.024874625 | 6.66E-12    | 2767.340233 |
| TMEM161A     | NM_017814    | 158.7335936 | 4.357919358 | 1.70E-15    | 36.42416955 |
| MRPL24       | NM_145729    | 75.08108251 | 10.02019526 | 0.000104667 | 7.492975991 |
| FAAH         | NM_001441    | 88.89575859 | 2.800266131 | 1.69E-08    | 31.7454679  |
| RAB31        | NM_006868    | 77.14285714 | 1.114340846 | 1.49E-08    | 69.22734407 |
| PITPNC1      | NM_181671    | 119.2638391 | 1.304942733 | 1.60E-11    | 91.39392563 |

|              |              |             |             |             |             |
|--------------|--------------|-------------|-------------|-------------|-------------|
| SLC2A6       | NM_001145099 | 167.0398994 | 11.03476098 | 1.39E-13    | 15.13760921 |
| NUB1         | NM_001243351 | 98.2033481  | 1.250784333 | 1.05E-10    | 78.51341392 |
| ZNF280A      | NM_080740    | 40.79536822 | 1.137527589 | 8.62E-05    | 35.86319013 |
| LINC01184    | NR_015360    | 156.6718189 | 1.788735993 | 1.00E-16    | 87.58800601 |
| DCTN4        | NM_016221    | 58.2033481  | 1.695562805 | 1.55E-05    | 34.32686064 |
| SLC43A1      | NM_003627    | 60.26512274 | 1.660928824 | 4.43E-06    | 36.28398874 |
| COX15        | NM_004376    | 123.9176338 | 5.876342487 | 1.36E-10    | 21.08754452 |
| SCAF1        | NM_021228    | 50.16216501 | 5.360651426 | 0.000345095 | 9.357475618 |
| CDK9         | NM_001261    | 89.36679679 | 9.477188631 | 1.32E-06    | 9.429673743 |
| SLC4A7       | NM_001258379 | 163.3873883 | 0.031921518 | 7.53E-28    | 5118.409092 |
| DHPS         | NM_001930    | 112.4890624 | 6.593154275 | 4.70E-10    | 17.06149404 |
| ASTE1        | NM_014065    | 77.93822536 | 4.305584723 | 3.76E-07    | 18.10165875 |
| RCBTB2       | NM_001286831 | 78.99871632 | 0.989942106 | 1.34E-08    | 79.80134984 |
| MXI1         | NM_130439    | 82.12098192 | 3.08266847  | 6.62E-08    | 26.6395763  |
| HNRNPLL      | NM_001142650 | 92.22393965 | 0.501089309 | 1.92E-12    | 184.0469115 |
| SLC19A2      | NM_006996    | 105.5083703 | 1.992383994 | 6.67E-12    | 52.95584113 |
| MYL6B        | NM_002475    | 55.34620525 | 6.275349323 | 0.000315174 | 8.819621411 |
| AP5S1        | NM_001204447 | 41.38482098 | 2.216986253 | 0.000805004 | 18.66715272 |
| KIAA0247     | NM_014734    | 65.71428571 | 0.885956417 | 1.58E-07    | 74.1732713  |
| NDUFAF4      | NM_014165    | 81.3256137  | 4.769988784 | 5.22E-07    | 17.049435   |
| BACH1        | NM_001186    | 74.55083703 | 0.866132156 | 4.05E-09    | 86.0732817  |
| IL7          | NM_000880    | 34.07979883 | 0.347164208 | 0.000276263 | 98.16622245 |
| ZNF490       | NM_020714    | 95.34620525 | 0.531696356 | 9.31E-12    | 179.3245416 |
| OGDHL        | NM_001143997 | 44.97812478 | 0.352180245 | 2.05E-06    | 127.7133668 |
| INTS6        | NM_001039938 | 140         | 30.629826   | 1.81E-06    | 4.570708303 |
| CEP85        | NM_022778    | 178.2033481 | 2.154687737 | 2.26E-19    | 82.70495305 |
| TM2D1        | NM_032027    | 92.48906239 | 1.307591734 | 9.95E-10    | 70.73237004 |
| CDCA5        | NM_080668    | 84.18275656 | 8.275935968 | 2.16E-06    | 10.17199225 |
| POC1B        | NM_172240    | 49.89704227 | 1.460882107 | 0.00016669  | 34.15542024 |
| SPATS2       | NM_001293286 | 103.9176338 | 2.235866195 | 7.69E-10    | 46.47757279 |
| MPHOSPH10    | NM_005791    | 99.26383906 | 4.186130662 | 2.02E-09    | 23.71255154 |
| NUDT18       | NM_024815    | 103.6525111 | 14.94838835 | 2.95E-06    | 6.934025839 |
| DNMT1        | NM_001379    | 86.77477667 | 3.563468221 | 3.09E-08    | 24.35121385 |
| PRMT6        | NM_018137    | 70.16216501 | 10.23475739 | 0.000108275 | 6.855283655 |
| RAD51C       | NM_002876    | 209.6319195 | 3.195380847 | 2.31E-23    | 65.60467423 |
| POLR2H       | NM_001278715 | 135.8764507 | 11.61165155 | 2.82E-10    | 11.70173339 |
| SNRNP35      | NM_022717    | 75.87645073 | 6.054078705 | 1.67E-06    | 12.5331127  |
| ELOVL6       | NM_001130721 | 63.91763382 | 1.869744312 | 7.48E-06    | 34.18522704 |
| ATP5J2-PTCD1 | NM_001198879 | 123.6525111 | 7.892606523 | 5.59E-10    | 15.66687896 |
| ACTB         | NM_001101    | 190.4272878 | 31.93184048 | 7.74E-10    | 5.963555024 |
| AMOTL1       | NM_001301007 | 75.87645073 | 0.626332623 | 4.77E-09    | 121.1440183 |
| ROCK2        | NM_004850    | 97.93822536 | 0.409833713 | 1.66E-11    | 238.9706417 |
| LOC440700    | NR_036683    | 75.61132799 | 1.222641454 | 2.74E-09    | 61.84260132 |
| C11orf73     | NR_024597    | 83.91763382 | 0.668977158 | 1.16E-10    | 125.4417027 |
| FAM169A      | NR_046462    | 89.89704227 | 1.032373866 | 3.42E-10    | 87.07799106 |
| ITPK1        | NM_001142593 | 60.26512274 | 1.352969461 | 1.37E-05    | 44.54285515 |
| CYBA         | NM_000101    | 186.7747767 | 18.28450462 | 6.50E-13    | 10.21492135 |
| C11orf52     | NM_080659    | 60.53024548 | 8.811360613 | 0.000587927 | 6.86956852  |
| MYO9B        | NM_001130065 | 37.40797988 | 1.585962767 | 0.002406093 | 23.58692187 |
| TMEM110      | NM_198563    | 137.9382254 | 0.038285954 | 2.21E-24    | 3602.841528 |
| ZNF594       | NM_032530    | 140.2651227 | 8.37538153  | 5.55E-12    | 16.74731142 |
| EPM2AIP1     | NM_014805    | 78.73359358 | 4.933752907 | 4.10E-07    | 15.95815499 |
| DAB2         | NM_001244871 | 77.93822536 | 0.144307594 | 1.09E-11    | 540.0840193 |
| ZNF497       | NM_198458    | 110.162165  | 6.3082884   | 1.22E-09    | 17.46308317 |
| SRCAP        | NM_006662    | 55.34620525 | 2.359287317 | 3.41E-05    | 23.4588661  |
| BACE2        | NM_138991    | 69.63191953 | 1.069922496 | 9.91E-08    | 65.0812744  |
| RPL3         | NM_001033853 | 204.4478793 | 26.91433046 | 3.12E-12    | 7.596246156 |
| FRMD8        | NM_001300833 | 103.3873883 | 2.166876061 | 3.96E-11    | 47.71264505 |
| TOP3A        | NM_004618    | 86.50965393 | 2.885420515 | 1.65E-08    | 29.98164513 |
| TXN2         | NM_012473    | 135.3462052 | 2.811488734 | 1.06E-14    | 48.14040463 |
| B4GALT1-AS1  | NR_108110    | 109.8970423 | 3.886645006 | 4.81E-11    | 28.27555439 |
| RPL4         | NM_000968    | 139.7940845 | 9.583421422 | 1.24E-11    | 14.58707474 |
| MPZL3        | NM_001286152 | 72.22393965 | 1.041266875 | 4.92E-08    | 69.36160303 |
| FAF2         | NM_014613    | 92.75418513 | 0.499818167 | 9.39E-12    | 185.575858  |



|          |              |             |             |             |             |
|----------|--------------|-------------|-------------|-------------|-------------|
| LARP4B   | NM_015155    | 60.26512274 | 2.617362477 | 1.51E-05    | 23.02513437 |
| CGRRF1   | NM_006568    | 116.1415735 | 1.074609329 | 5.23E-14    | 108.0779501 |
| ARCN1    | NM_001655    | 97.93822536 | 0.820921902 | 1.30E-11    | 119.3027316 |
| DSE      | NM_013352    | 107.3050222 | 1.264141649 | 2.28E-11    | 84.8837013  |
| AK6      | NM_016283    | 141.060491  | 2.89041796  | 6.12E-15    | 48.80280046 |
| CEPT1    | NM_001007794 | 86.50965393 | 1.97384685  | 1.09E-08    | 43.82794639 |
| ELOVL5   | NM_001242830 | 55.34620525 | 2.592824211 | 4.93E-05    | 21.34591501 |
| RCBTB1   | NM_018191    | 160.5302455 | 1.293764218 | 5.48E-18    | 124.0799855 |
| CISD1    | NM_018464    | 86.77477667 | 0.730041001 | 6.68E-11    | 118.8628811 |
| MOGS     | NM_001146158 | 124.1827566 | 14.67426217 | 3.28E-08    | 8.462623545 |
| TRIM13   | NM_001007278 | 174.8159598 | 6.372257593 | 3.22E-16    | 27.4339129  |
| MLX      | NM_198204    | 66.77477667 | 9.855947302 | 0.000457394 | 6.775074442 |
| KCTD18   | NM_152387    | 115.8764507 | 2.340577308 | 3.58E-13    | 49.50763658 |
| CACFD1   | NM_001242369 | 87.30502215 | 5.62605234  | 1.29E-07    | 15.51798968 |
| C20orf24 | NM_018840    | 104.713002  | 8.01143237  | 2.76E-08    | 13.07044698 |
| GOT1     | NM_002079    | 92.22393965 | 2.584901475 | 2.35E-09    | 35.67793222 |
| DAPK2    | NM_014326    | 29.36679679 | 1.231268652 | 0.002612756 | 23.85084421 |
| TIRAP    | NM_001039661 | 137.9382254 | 6.602108785 | 4.53E-12    | 20.89305551 |
| STARD3   | NM_006804    | 185.2432475 | 5.141495669 | 1.84E-17    | 36.02905836 |
| FAM86HP  | NR_024252    | 106.7747767 | 4.946622883 | 1.89E-09    | 21.58538849 |
| AASDHPPT | NM_015423    | 117.4079799 | 0.890088311 | 4.92E-15    | 131.9059901 |
| CTSV     | NM_001333    | 118.4684708 | 4.742159364 | 2.24E-11    | 24.98196744 |
| H2AFY    | NM_138609    | 85.71428571 | 1.789160638 | 1.61E-08    | 47.9075405  |
| ETFA     | NM_001127716 | 144.4478793 | 0.592047234 | 5.27E-18    | 243.9803298 |
| PSAT1    | NM_058179    | 117.9382254 | 0.96148084  | 5.23E-14    | 122.6631052 |
| CTDSPL2  | NM_016396    | 98.2033481  | 1.256158868 | 9.78E-10    | 78.17749061 |
| SEMA4B   | NM_198925    | 163.1222656 | 5.457089653 | 9.15E-15    | 29.89180606 |
| KDF1     | NM_152365    | 101.8558592 | 6.182364088 | 3.87E-09    | 16.4752282  |
| FAM86A   | NM_201598    | 123.1222656 | 6.001623566 | 3.36E-11    | 20.5148264  |
| SF3A3    | NM_006802    | 118.7335936 | 0.650229962 | 3.06E-15    | 182.6024646 |
| TXNDC9   | NM_005783    | 136.1415735 | 0.952351102 | 1.66E-18    | 142.9531327 |
| HHEX     | NM_002729    | 147.3050222 | 6.8710519   | 4.56E-14    | 21.43849651 |
| BMF      | NM_001003943 | 58.2033481  | 2.784941491 | 1.09E-05    | 20.89930732 |
| ZNF512   | NM_032434    | 119.2638391 | 1.05487173  | 8.22E-14    | 113.0600391 |
| RFC3     | NM_181558    | 72.75418513 | 1.336704537 | 8.69E-07    | 54.42802287 |
| DDX46    | NM_014829    | 39.26383906 | 2.048601075 | 0.001182022 | 19.16617126 |
| CLTC     | NM_004859    | 126.7747767 | 3.872470661 | 3.08E-11    | 32.7374402  |
| TIMM21   | NM_014177    | 33.28443061 | 0.251789208 | 1.90E-05    | 132.191649  |
| FBXO17   | NM_024907    | 60.79536822 | 1.123460719 | 2.95E-06    | 54.11436927 |
| NACA     | NR_045277    | 101.3256137 | 10.39398042 | 1.53E-07    | 9.748489955 |
| ZNF695   | NR_037892    | 91.69369417 | 0.926418928 | 9.95E-10    | 98.97649039 |
| UFSP2    | NR_028085    | 84.18275656 | 0.563559952 | 2.31E-10    | 149.3767544 |
| CECR5    | NM_033070    | 124.713002  | 3.640718083 | 1.88E-12    | 34.25505607 |
| C15orf41 | NM_001130010 | 78.2033481  | 0.564108189 | 1.15E-08    | 138.6318258 |
| CAPN5    | NM_004055    | 144.4478793 | 0.400380546 | 3.73E-20    | 360.7764678 |
| RNFT1    | NM_016125    | 190.9575332 | 4.542720886 | 2.13E-20    | 42.03593794 |
| ENO1     | NM_001428    | 90.69241049 | 15.51563056 | 2.47E-05    | 5.845228793 |
| SMAD3    | NM_005902    | 58.2033481  | 4.806073787 | 0.000177984 | 12.11037339 |
| GSPT1    | NM_002094    | 141.5907364 | 2.174292263 | 3.82E-15    | 65.12037911 |
| ARHGEF3  | NM_001128615 | 87.30502215 | 1.308631075 | 1.68E-09    | 66.71477076 |
| RAB8A    | NM_005370    | 33.28443061 | 3.198356379 | 0.003539403 | 10.40672979 |
| MPST     | NM_021126    | 126.2445312 | 4.158878937 | 1.40E-12    | 30.35542345 |
| FAM133B  | NM_001288584 | 49.89704227 | 0.689464741 | 2.74E-06    | 72.37069471 |
| PSMA6    | NM_001282232 | 53.01930787 | 1.223766019 | 1.03E-05    | 43.32471    |
| CD97     | NM_001025160 | 68.83655131 | 9.03552869  | 5.65E-05    | 7.618430938 |
| PPP2R3C  | NM_017917    | 73.28443061 | 1.867507782 | 1.47E-07    | 39.24183413 |
| ZCCHC3   | NM_033089    | 107.3050222 | 18.65660095 | 4.74E-06    | 5.751584785 |
| PTCD2    | NM_001284404 | 132.7541851 | 3.20671602  | 1.60E-12    | 41.39879687 |
| ACTR3    | NM_005721    | 34.81595977 | 1.048092288 | 0.000521184 | 33.21841041 |
| CHMP2B   | NM_001244644 | 152.4890624 | 1.643062765 | 8.01E-18    | 92.80781331 |
| UFD1L    | NM_005659    | 73.01930787 | 1.724754703 | 8.77E-08    | 42.33605378 |
| NMT1     | NM_021079    | 117.6731026 | 3.816125619 | 1.18E-10    | 30.83575185 |
| NT5E     | NM_002526    | 50.16216501 | 4.721219553 | 0.000493043 | 10.62483209 |
| FAM83D   | NM_030919    | 127.5701449 | 2.282366157 | 2.79E-14    | 55.89381199 |

|              |              |             |             |             |             |
|--------------|--------------|-------------|-------------|-------------|-------------|
| TIGD1        | NM_145702    | 163.6525111 | 16.14824092 | 7.27E-11    | 10.13438627 |
| NCKAP1       | NM_205842    | 126.2445312 | 0.824492748 | 1.44E-14    | 153.1178189 |
| ABCB8        | NM_001282293 | 104.713002  | 2.784618125 | 1.39E-10    | 37.60407974 |
| FAM35A       | NM_019054    | 92.22393965 | 0.781259686 | 1.07E-10    | 118.0451791 |
| SLC36A1      | NM_078483    | 81.59073644 | 0.467396044 | 4.09E-11    | 174.5644564 |
| SSH3         | NM_017857    | 112.2239396 | 9.925369298 | 2.39E-08    | 11.30677724 |
| PTTG1IP      | NM_004339    | 55.08108251 | 4.571423207 | 0.000204847 | 12.04900094 |
| DENND4B      | NM_014856    | 69.10167405 | 3.091634603 | 3.23E-06    | 22.35117759 |
| SMIM7        | NM_001300925 | 120.7953682 | 7.425918623 | 1.53E-10    | 16.26672394 |
| STK4-AS1     | NR_038341    | 81.3256137  | 8.150500642 | 7.02E-06    | 9.977989975 |
| ZBTB1        | NM_014950    | 103.9176338 | 1.813589929 | 2.87E-11    | 57.2994105  |
| CHST11       | NM_018413    | 60.26512274 | 0.854696409 | 1.33E-06    | 70.51056038 |
| POLR2J2      | NM_032959    | 57.40797988 | 1.088636357 | 6.51E-06    | 52.73384406 |
| CAMK1D       | NM_020397    | 29.36679679 | 0.2788107   | 0.002525241 | 105.3288012 |
| FXN          | NM_001161706 | 85.97940845 | 3.339015204 | 3.05E-08    | 25.74993021 |
| BAIAP2       | NM_006340    | 217.9382254 | 4.899251571 | 2.77E-20    | 44.48398336 |
| MCM2         | NR_073375    | 70.69241049 | 1.836698811 | 1.53E-07    | 38.48884209 |
| ST3GAL1      | NM_003033    | 137.6731026 | 1.241079047 | 4.79E-14    | 110.9301643 |
| USP16        | NM_001001992 | 72.22393965 | 1.348321316 | 1.28E-07    | 53.56582201 |
| RABGAP1      | NM_012197    | 180.7953682 | 1.285098579 | 2.49E-18    | 140.6859919 |
| TMBIM1       | NM_022152    | 107.8352676 | 6.833592068 | 3.52E-09    | 15.78017338 |
| KIAA0196     | NM_014846    | 69.89704227 | 2.081378642 | 1.37E-06    | 33.58208875 |
| PLXNB1       | NM_002673    | 57.67310262 | 0.343085777 | 2.71E-08    | 168.1011177 |
| LONRF1       | NM_152271    | 80.26512274 | 2.608841185 | 4.70E-08    | 30.76658065 |
| CS           | NM_004077    | 115.8764507 | 3.96666936  | 4.84E-11    | 29.21253077 |
| ZBTB43       | NM_014007    | 109.3667968 | 2.192179392 | 1.48E-11    | 49.88952875 |
| TBC1D9       | NM_015130    | 63.1222656  | 0.248924509 | 8.50E-08    | 253.5799539 |
| S100A16      | NM_080388    | 112.4890624 | 13.21691396 | 2.71E-07    | 8.510993018 |
| UQCRC2       | NM_003366    | 55.61132799 | 1.992403969 | 2.33E-05    | 27.91167296 |
| WBP11        | NM_016312    | 35.61132799 | 0.414581092 | 6.42E-05    | 85.89713488 |
| DARS         | NM_001293312 | 115.0810825 | 0.668410717 | 5.48E-14    | 172.171211  |
| VPS54        | NM_001005739 | 40.53024548 | 0.11391367  | 2.48E-05    | 355.797909  |
| RPL34        | NM_033625    | 70.16216501 | 6.803823836 | 1.09E-05    | 10.31216661 |
| PITRM1       | NM_001242307 | 157.4079799 | 2.772729377 | 8.27E-16    | 56.77004803 |
| NDNL2        | NM_138704    | 160.7953682 | 16.04091411 | 4.67E-10    | 10.02407762 |
| FBXO38       | NM_030793    | 78.73359358 | 1.37368262  | 4.14E-08    | 57.31570921 |
| RASGRF1      | NM_153815    | 29.63191953 | 0.927922405 | 0.001866514 | 31.93361791 |
| NBPF3        | NM_001256417 | 160.7953682 | 2.367260642 | 3.82E-17    | 67.92465745 |
| BLVRA        | NM_001253823 | 80.53024548 | 1.022956226 | 1.70E-08    | 78.72306112 |
| ZNF674       | NM_001146291 | 61.3256137  | 1.138738696 | 4.75E-06    | 53.85398241 |
| NDUFA11      | NR_034166    | 58.2033481  | 5.595390896 | 0.000251428 | 10.40201644 |
| GANAB        | NM_198335    | 69.89704227 | 5.93464523  | 8.50E-06    | 11.77779624 |
| HDGFRP2      | NM_001001520 | 28.83655131 | 0.657372677 | 0.001241532 | 43.86636729 |
| RAB19        | NM_001008749 | 35.87645073 | 0.768113749 | 7.93E-05    | 46.70721069 |
| PIGY         | NM_001042616 | 187.5701449 | 10.21949614 | 5.29E-16    | 18.35414802 |
| RNF6         | NM_183044    | 80.79536822 | 1.617247656 | 4.76E-09    | 49.95856258 |
| POLR3GL      | NM_032305    | 141.5907364 | 1.050304816 | 2.25E-18    | 134.8091852 |
| DDX11        | NM_152438    | 76.93694168 | 4.669658807 | 1.26E-06    | 16.47592359 |
| C19orf47     | NM_001256441 | 103.6525111 | 2.015929739 | 3.40E-11    | 51.41672802 |
| PET117       | NM_001164811 | 136.6718189 | 9.163923673 | 1.90E-11    | 14.91411581 |
| RMDN3        | NM_018145    | 78.46847084 | 2.462316798 | 3.49E-08    | 31.86773973 |
| EEF2         | NM_001961    | 157.9974326 | 14.84434171 | 2.67E-11    | 10.64361329 |
| LOC100133669 | NR_026913    | 46.77477667 | 1.957130332 | 0.000230714 | 23.89967388 |
| FRAT2        | NM_012083    | 115.0810825 | 1.180542838 | 2.86E-13    | 97.48149646 |
| IL17RE       | NM_001193380 | 81.3256137  | 3.775205678 | 1.47E-07    | 21.54203522 |
| NUDT4P2      | NR_104005    | 161.8558592 | 3.436824823 | 8.67E-17    | 47.09459094 |
| RBAK         | NM_021163    | 129.6319195 | 2.029952078 | 1.00E-14    | 63.85959595 |
| PSMC3        | NM_002804    | 107.0398994 | 2.066453059 | 1.01E-12    | 51.79885358 |
| DCUN1D3      | NM_173475    | 37.67310262 | 1.981940996 | 0.001937223 | 19.00818576 |
| SEMA4F       | NR_073399    | 122.3861047 | 2.006000986 | 1.36E-13    | 61.00999226 |
| NTAN1        | NM_001270766 | 100.7953682 | 1.843919386 | 1.48E-11    | 54.6636523  |
| CSGALNACT2   | NM_018590    | 97.93822536 | 0.205795954 | 1.38E-14    | 475.8996645 |
| LINC01481    | NR_120460    | 137.9382254 | 2.919964849 | 3.13E-14    | 47.23968695 |
| MPZL1        | NM_024569    | 137.9382254 | 0.346220725 | 7.20E-19    | 398.4112317 |

|              |              |             |             |             |             |
|--------------|--------------|-------------|-------------|-------------|-------------|
| FAM214B      | NM_025182    | 51.42857143 | 7.745315795 | 0.001329509 | 6.639957981 |
| C1orf123     | NM_017887    | 195.611328  | 6.502080862 | 4.91E-19    | 30.08441946 |
| AHNAK        | NM_001620    | 130.162165  | 5.758709735 | 2.78E-11    | 22.60266118 |
| LOC100506747 | NR_036557    | 110.9575332 | 2.019947035 | 1.01E-12    | 54.93091221 |
| MAP4         | NM_001134364 | 173.0193079 | 1.547653239 | 3.94E-17    | 111.7946213 |
| PNPLA3       | NM_025225    | 161.5907364 | 0.899218482 | 1.12E-21    | 179.7013069 |
| VBP1         | NM_003372    | 27.03989941 | 0.049147295 | 0.000197112 | 550.1808252 |
| C22orf29     | NM_024627    | 203.9176338 | 12.64218086 | 1.40E-16    | 16.1299412  |
| PRKAR2A-AS1  | NR_109996    | 110.6924105 | 6.945479248 | 2.65E-09    | 15.93733226 |
| UBIAD1       | NM_013319    | 166.2445312 | 2.524285794 | 4.27E-19    | 65.85804651 |
| C14orf119    | NM_017924    | 115.0810825 | 6.18527807  | 3.66E-10    | 18.60564411 |
| AP2A2        | NM_012305    | 141.060491  | 0.205146022 | 4.51E-20    | 687.6101707 |
| PSMD5-AS1    | NR_024408    | 92.48906239 | 3.800103694 | 4.11E-09    | 24.3385628  |
| BRK1         | NM_018462    | 124.4478793 | 1.860950436 | 5.93E-15    | 66.87329062 |
| IFNAR2       | NM_000874    | 146.5096539 | 2.51299014  | 7.38E-16    | 58.3009267  |
| ATP6V0B      | NM_004047    | 87.03989941 | 20.14502758 | 0.000433662 | 4.320664198 |
| AAR2         | NM_001271874 | 140.7953682 | 0.851412297 | 8.62E-19    | 165.3668484 |
| RNF169       | NM_001098638 | 81.3256137  | 0.908680083 | 3.13E-09    | 89.49862031 |
| CHD6         | NM_032221    | 21.59073644 | 0.028676823 | 0.002923898 | 752.8984874 |
| LOC101928414 | NR_120335    | 101.060491  | 0.838692098 | 3.72E-12    | 120.4977264 |
| COP55        | NM_006837    | 62.12098192 | 2.657581694 | 2.01E-06    | 23.3750037  |
| OXR1         | NM_181354    | 172.7541851 | 0.6345614   | 3.15E-21    | 272.2418748 |
| CCDC94       | NM_018074    | 90.16216501 | 0.735470306 | 1.55E-11    | 122.5911696 |
| SF3B4        | NM_005850    | 172.2239396 | 14.16620723 | 9.77E-13    | 12.15737825 |
| TSTD3        | NM_001195131 | 169.3667968 | 4.222998191 | 1.11E-17    | 40.10581799 |
| QPCTL        | NM_017659    | 61.59073644 | 4.964804584 | 1.54E-05    | 12.40547043 |
| DNAJC18      | NM_152686    | 74.28571429 | 0.243091997 | 2.06E-11    | 305.586836  |
| C20orf27     | NM_001258429 | 101.5907364 | 4.692521431 | 5.66E-10    | 21.64949866 |
| LYRM7        | NR_121658    | 66.50965393 | 0.253508252 | 1.15E-09    | 262.3569583 |
| METTL18      | NM_033418    | 87.03989941 | 4.802221472 | 2.12E-07    | 18.12492404 |
| HEXIM2       | NM_144608    | 57.93822536 | 9.957290445 | 0.001267945 | 5.818673833 |
| SYVN1        | NM_172230    | 96.67181894 | 17.66320606 | 3.60E-05    | 5.473061832 |
| NAA20        | NM_181528    | 55.34620525 | 2.687482372 | 1.66E-05    | 20.59407192 |
| LDHA         | NM_001165414 | 64.18275656 | 1.604180641 | 3.36E-07    | 40.00968152 |
| TMEM33       | NM_018126    | 89.63191953 | 1.542785576 | 8.06E-10    | 58.09745758 |
| LOC101929057 | NR_111915    | 128.8365513 | 1.794137378 | 1.22E-13    | 71.80974706 |
| PFN4         | NM_199346    | 80.53024548 | 3.831347159 | 2.61E-07    | 21.01878064 |
| STRA13       | NM_001271007 | 149.6319195 | 19.26742789 | 1.78E-09    | 7.766055769 |
| OSBPL10      | NM_017784    | 100         | 0.981609492 | 8.55E-11    | 101.8735055 |
| PDCD2L       | NM_032346    | 97.40797988 | 3.942497647 | 4.57E-09    | 24.70717515 |
| RPS7         | NM_001011    | 98.73359358 | 10.35750272 | 5.38E-07    | 9.532567476 |
| XRCC6        | NM_001288978 | 83.91763382 | 4.618406912 | 4.32E-07    | 18.17025555 |
| ZCCHC6       | NM_001185074 | 81.06049096 | 0.6806593   | 9.05E-10    | 119.0911385 |
| NOP10        | NM_018648    | 98.2033481  | 8.364611618 | 1.05E-06    | 11.74033567 |
| GLB1         | NM_000404    | 109.3667968 | 0.905178507 | 1.47E-12    | 120.8234574 |
| LOC100507217 | NR_037601    | 22.85714286 | 0.430186835 | 0.003313529 | 53.13305982 |
| ZC3H10       | NM_032786    | 97.93822536 | 15.98369117 | 1.43E-05    | 6.12738474  |
| LOXL1        | NM_005576    | 67.03989941 | 4.852461962 | 1.61E-05    | 13.81564656 |
| COPZ1        | NM_016057    | 119.2638391 | 3.042147243 | 9.45E-12    | 39.20383517 |
| CHSY1        | NM_014918    | 82.85714286 | 0.839556236 | 8.50E-10    | 98.69159363 |
| PAM          | NM_001177306 | 64.4478793  | 0.920271136 | 2.43E-07    | 70.03140351 |
| TRAPPC2      | NM_001011658 | 54.81595977 | 2.304264883 | 2.01E-05    | 23.78891427 |
| COX19        | NM_001031617 | 50.69241049 | 9.113594414 | 0.004106883 | 5.562285108 |
| SLC26A2      | NM_000112    | 137.4079799 | 3.264985831 | 1.18E-13    | 42.08532195 |
| EXOC8        | NM_175876    | 80.53024548 | 0.681500441 | 3.57E-11    | 118.1660945 |
| CIAPIN1      | NM_020313    | 153.5495533 | 1.940104726 | 1.34E-17    | 79.14498187 |
| FBXO7        | NM_001033024 | 70.95753323 | 0.103651197 | 2.02E-12    | 684.5799716 |
| PNO1         | NM_020143    | 89.36679679 | 0.768570875 | 2.48E-11    | 116.2765851 |
| SURF6        | NM_006753    | 126.2445312 | 2.977614744 | 7.60E-14    | 42.39787281 |
| MFSD2A       | NM_001287808 | 104.713002  | 1.947807318 | 1.46E-11    | 53.7594253  |
| FBXO8        | NM_012180    | 48.36551311 | 0.56532166  | 4.32E-06    | 85.55397129 |
| TBC1D19      | NM_018317    | 155.0810825 | 0.303619108 | 2.62E-19    | 510.7751076 |
| C8orf33      | NM_023080    | 80.53024548 | 3.704862    | 1.13E-07    | 21.73636845 |
| ATP6V0C      | NM_001694    | 97.40797988 | 7.953916709 | 4.46E-08    | 12.24654261 |

|                 |              |             |             |             |             |
|-----------------|--------------|-------------|-------------|-------------|-------------|
| NLRX1           | NM_024618    | 130.4272878 | 4.484151754 | 1.97E-12    | 29.08627872 |
| FARSB           | NM_005687    | 62.38610466 | 0.776539395 | 2.36E-07    | 80.33862167 |
| EPN1            | NM_001130072 | 91.95881691 | 0.884504768 | 2.44E-11    | 103.9664457 |
| FADS3           | NM_021727    | 86.77477667 | 4.815617908 | 8.49E-08    | 18.01944804 |
| ALMS1           | NM_015120    | 47.03989941 | 0.274606091 | 2.30E-05    | 171.2995487 |
| PIGC            | NM_002642    | 52.75418513 | 4.392521888 | 0.000439887 | 12.00999938 |
| C16orf72        | NM_014117    | 132.7541851 | 3.497777733 | 8.03E-13    | 37.95386536 |
| PLEKHA8         | NM_001197027 | 109.8970423 | 0.418518193 | 8.89E-14    | 262.5860574 |
| NBR2            | NR_003108    | 41.06049096 | 2.368164706 | 0.000733876 | 17.33852838 |
| KDM3B           | NM_016604    | 37.67310262 | 0.490999413 | 0.000178787 | 76.72738829 |
| HELZ            | NM_014877    | 132.2239396 | 0.145027492 | 6.51E-18    | 911.7163771 |
| GGTA1P          | NR_003191    | 61.06049096 | 0.891770347 | 2.62E-07    | 68.47109363 |
| GAN             | NM_022041    | 219.5289618 | 1.442426507 | 9.10E-25    | 152.1942094 |
| IFT172          | NM_015662    | 18.99871632 | 0.013594039 | 0.002143505 | 1397.576996 |
| CCDC186         | NM_018017    | 167.3050222 | 0.846406399 | 2.86E-20    | 197.6651196 |
| NUP62           | NM_001193357 | 103.9176338 | 3.724623618 | 9.75E-10    | 27.90017045 |
| GRB10           | NM_001001555 | 31.42857143 | 0.669781295 | 0.001252021 | 46.92363262 |
| CTR9            | NM_014633    | 110.9575332 | 3.270790817 | 1.32E-10    | 33.92376322 |
| SLTM            | NM_024755    | 191.9588169 | 0.919249686 | 5.03E-23    | 208.821194  |
| MTRF1           | NM_004294    | 69.89704227 | 0.580668617 | 8.93E-09    | 120.3733769 |
| GAS2L1          | NM_152236    | 94.81595977 | 7.634944361 | 6.77E-08    | 12.41868379 |
| RPL36A-HNRNPH2  | NM_001199974 | 71.95881691 | 6.519383112 | 2.39E-05    | 11.03767269 |
| RNF2            | NM_007212    | 89.10167405 | 0.545729934 | 2.32E-11    | 163.2706373 |
| UBXN7           | NM_015562    | 121.060491  | 0.247888089 | 9.89E-17    | 488.3675188 |
| TAOK2           | NM_001252043 | 89.89704227 | 4.421301178 | 2.37E-08    | 20.33271172 |
| MIR181A1HG      | NR_040073    | 52.22393965 | 0.238318801 | 2.24E-06    | 219.1347872 |
| TROVE2          | NM_004600    | 98.99871632 | 2.433736203 | 1.11E-10    | 40.67766925 |
| SCAMP2          | NM_005697    | 186.5096539 | 2.119212248 | 1.82E-20    | 88.00895433 |
| HCN3            | NM_020897    | 46.24453119 | 0.052847535 | 3.78E-08    | 875.0555992 |
| SLMO1           | NM_001142405 | 140.7953682 | 3.611212726 | 5.66E-14    | 38.98838947 |
| HNRNPR          | NM_001297622 | 57.93822536 | 1.806882591 | 1.33E-05    | 32.06529614 |
| EARS2           | NR_003501    | 87.03989941 | 2.180052694 | 8.38E-09    | 39.9255943  |
| LOC646903       | NR_036538    | 112.2239396 | 4.110124252 | 2.41E-10    | 27.30426935 |
| CSNK2A1         | NM_177560    | 134.8159598 | 3.143856387 | 1.82E-13    | 42.88235312 |
| LOC100507530    | NR_125386    | 121.5907364 | 1.585484332 | 1.88E-12    | 76.68996407 |
| RPRD1B          | NM_021215    | 108.1003904 | 1.441908318 | 2.22E-11    | 74.97036323 |
| DMAP1           | NM_001034024 | 112.7541851 | 6.021053363 | 6.10E-10    | 18.72665434 |
| CDC20           | NM_001255    | 135.0810825 | 17.8030089  | 4.03E-08    | 7.587542269 |
| CTC1            | NR_046431    | 123.6525111 | 7.323949133 | 1.95E-10    | 16.88331102 |
| TMEM199         | NM_152464    | 67.03989941 | 2.02077003  | 1.17E-07    | 33.17542245 |
| SMC5-AS1        | NR_039990    | 118.2033481 | 0.227054423 | 7.16E-18    | 520.5947831 |
| UBP1            | NM_001128161 | 91.69369417 | 1.984566257 | 3.14E-09    | 46.20339272 |
| NDUFA5          | NR_104169    | 44.4478793  | 1.294866062 | 0.000100681 | 34.32623699 |
| PSKH1           | NM_006742    | 112.4890624 | 1.736705359 | 4.50E-12    | 64.77152951 |
| DIS3            | NM_014953    | 81.59073644 | 2.694624329 | 1.59E-08    | 30.27907659 |
| CCT4            | NM_006430    | 164.1827566 | 7.053720884 | 7.37E-15    | 23.27604951 |
| ASPM            | NM_001206846 | 35.61132799 | 1.23949044  | 0.000526115 | 28.73061932 |
| PPIL2           | NM_014337    | 112.4890624 | 2.27519754  | 6.69E-12    | 49.44144868 |
| GBA             | NM_001171811 | 69.63191953 | 7.731592122 | 2.66E-05    | 9.006155321 |
| SEC24B-AS1      | NR_039978    | 124.4478793 | 3.988655924 | 3.49E-13    | 31.20045491 |
| RP2             | NM_006915    | 69.36679679 | 0.4238896   | 3.63E-09    | 163.643545  |
| NLE1            | NM_001014445 | 114.8159598 | 1.874018614 | 2.10E-13    | 61.26724619 |
| ZMYM5           | NM_001142684 | 123.3873883 | 2.318467391 | 5.95E-13    | 53.21937622 |
| CMTM8           | NM_178868    | 83.65251108 | 1.693407687 | 6.19E-08    | 49.39892012 |
| FAM83H          | NM_198488    | 70.16216501 | 14.18556869 | 0.000759293 | 4.946024127 |
| SLC7A6          | NM_003983    | 124.4478793 | 3.264493107 | 6.44E-12    | 38.12165479 |
| CNNM4           | NM_020184    | 60.26512274 | 1.185841403 | 5.37E-06    | 50.8205588  |
| TMEM41B         | NM_001165030 | 75.08108251 | 1.916601574 | 4.77E-08    | 39.17406911 |
| PRKCG           | NM_002739    | 55.34620525 | 1.836859013 | 1.80E-05    | 30.13089456 |
| SPECC1L-ADORA2A | NR_103546    | 194.550837  | 1.622147513 | 1.65E-19    | 119.9341215 |
| LOC100506804    | NR_040081    | 101.5907364 | 0.960183002 | 5.25E-14    | 105.8035148 |
| SCD5            | NM_024906    | 81.3256137  | 1.689053009 | 1.26E-07    | 48.14864498 |
| EML2            | NM_012155    | 69.10167405 | 8.522075062 | 5.71E-05    | 8.108550271 |
| CBWD6           | NM_001085457 | 24.4478793  | 0.660291838 | 0.003839443 | 37.02586933 |

|              |              |             |             |             |             |
|--------------|--------------|-------------|-------------|-------------|-------------|
| MRPL32       | NM_031903    | 101.8558592 | 3.052939552 | 2.98E-11    | 33.36320862 |
| CBR3         | NM_001236    | 58.46847084 | 5.075813361 | 6.49E-05    | 11.51903482 |
| ZNF296       | NM_145288    | 144.1827566 | 12.29331033 | 1.96E-10    | 11.7285542  |
| PLEKHO2      | NM_001195059 | 135.8764507 | 4.169115729 | 2.47E-13    | 32.59119189 |
| PAXBPI-AS1   | NR_038879    | 101.5907364 | 3.153583672 | 2.03E-10    | 32.214378   |
| OAT          | NM_000274    | 215.8764507 | 3.814110361 | 1.82E-22    | 56.59942433 |
| RC3H2        | NM_018835    | 137.9382254 | 1.933849063 | 1.58E-14    | 71.32833064 |
| ZNF575       | NM_174945    | 94.81595977 | 6.558451786 | 8.71E-08    | 14.45706439 |
| MKL1         | NM_001282662 | 143.3873883 | 0.620746145 | 4.51E-16    | 230.9919915 |
| SUSD1        | NM_001282643 | 51.95881691 | 1.478667759 | 9.32E-05    | 35.1389395  |
| ATG13        | NM_001205119 | 40.79536822 | 2.699236214 | 0.001199853 | 15.11367105 |
| EMP2         | NM_001424    | 124.713002  | 1.604042507 | 1.99E-13    | 77.74918777 |
| MAD2L1BP     | NM_001003690 | 75.61132799 | 13.25862955 | 0.000162637 | 5.70280116  |
| UBAC2        | NM_001144072 | 147.5701449 | 2.142157082 | 1.95E-14    | 68.88857317 |
| ABCC4        | NM_005845    | 115.3462052 | 0.732331233 | 1.60E-12    | 157.5055113 |
| TTC1         | NM_001282500 | 49.89704227 | 1.775151351 | 0.000138835 | 28.10861296 |
| OTUD6B       | NM_016023    | 46.77477667 | 2.935324728 | 0.000179245 | 15.93512848 |
| THAP9-AS1    | NR_034077    | 101.8558592 | 9.635893681 | 1.12E-07    | 10.57046316 |
| H3F3A        | NM_002107    | 134.2857143 | 5.509469124 | 1.94E-12    | 24.37362135 |
| TMEM141      | NM_032928    | 118.4684708 | 13.13654315 | 1.84E-07    | 9.018237862 |
| TMEM41A      | NM_080652    | 162.9163501 | 4.353077348 | 1.37E-16    | 37.42555831 |
| DAD1         | NM_001344    | 106.7747767 | 2.9068278   | 3.05E-10    | 36.73240522 |
| IQGAP2       | NM_006633    | 41.85585918 | 0.304695465 | 6.26E-05    | 137.3694852 |
| ANXA5        | NM_001154    | 189.8970423 | 1.688307834 | 9.20E-23    | 112.4777356 |
| MID2         | NM_012216    | 48.83655131 | 0.51071039  | 9.56E-06    | 95.62474598 |
| C18orf32     | NM_001035005 | 167.0398994 | 4.411245262 | 2.59E-17    | 37.86683567 |
| SH2B3        | NM_005475    | 86.77477667 | 4.35581598  | 2.24E-07    | 19.92158922 |
| CGN          | NM_020770    | 103.3873883 | 1.139664398 | 4.82E-12    | 90.71739762 |
| PPP5C        | NM_006247    | 90.16216501 | 0.884692041 | 3.47E-10    | 101.9136161 |
| DRAM1        | NM_018370    | 153.5495533 | 0.713969078 | 4.40E-19    | 215.0647108 |
| LOC728730    | NR_037875    | 164.4478793 | 0.306802516 | 5.86E-21    | 536.0056414 |
| ZNF224       | NM_013398    | 66.77477667 | 0.177721874 | 4.00E-10    | 375.7262701 |
| NDUFS7       | NM_024407    | 121.060491  | 5.276334956 | 3.03E-11    | 22.9440496  |
| TNIP2        | NM_001292016 | 157.6731026 | 3.359070043 | 2.55E-17    | 46.93951022 |
| CASP3        | NM_032991    | 71.69369417 | 0.666732203 | 9.10E-09    | 107.5299705 |
| ZNF576       | NM_024327    | 53.54955335 | 7.725895492 | 0.000940032 | 6.931177545 |
| UBXN2A       | NM_181713    | 98.46847084 | 0.612125615 | 2.85E-12    | 160.8631765 |
| LYPLAL1-AS1  | NR_038845    | 30.16216501 | 0.441916281 | 0.000855517 | 68.25312018 |
| ISOC1        | NM_016048    | 181.5907364 | 0.742721558 | 3.19E-26    | 244.4936929 |
| SGK3         | NM_001033578 | 95.34620525 | 1.565832628 | 4.21E-09    | 60.89169655 |
| INTS5        | NM_030628    | 245.773493  | 11.40165427 | 4.53E-22    | 21.55595032 |
| TMEM53       | NM_024587    | 87.03989941 | 2.665917662 | 4.58E-09    | 32.64913266 |
| ZNF398       | NM_170686    | 106.2445312 | 1.743086111 | 2.05E-11    | 60.95196933 |
| HSF2BP       | NM_007031    | 83.91763382 | 0.148558151 | 2.92E-11    | 564.8807105 |
| PGPEP1       | NM_017712    | 57.93822536 | 5.571138531 | 0.000129368 | 10.39971005 |
| SNX3         | NM_152827    | 135.611328  | 1.979545864 | 3.30E-14    | 68.50628241 |
| CBWD3        | NM_201453    | 70.42728775 | 0.11651424  | 6.15E-11    | 604.452192  |
| MAGEB2       | NM_002364    | 63.65251108 | 3.450296112 | 8.22E-06    | 18.44841979 |
| HSP90AA1     | NM_001017963 | 129.3667968 | 6.778202914 | 1.61E-10    | 19.08570729 |
| FOXA3        | NM_004497    | 60.26512274 | 5.276957962 | 0.000122466 | 11.42042881 |
| ZCCHC11      | NM_015269    | 105.7142857 | 0.250119006 | 1.10E-13    | 422.6559493 |
| MTERF1       | NM_001301135 | 85.773493   | 3.183192335 | 4.31E-09    | 26.94574627 |
| UBE2G1       | NM_003342    | 180.2651227 | 1.657215509 | 9.87E-19    | 108.7759086 |
| CREG2        | NM_153836    | 58.99871632 | 0.702003763 | 1.31E-07    | 84.04330492 |
| MIPEPP3      | NR_038939    | 98.73359358 | 1.336331896 | 4.20E-11    | 73.88403574 |
| HPRT1        | NM_000194    | 71.95881691 | 0.673095106 | 3.62E-09    | 106.9073542 |
| RHOG         | NM_001665    | 114.550837  | 8.243787778 | 4.23E-09    | 13.89541314 |
| TGFA         | NM_003236    | 100.5302455 | 1.597043228 | 7.39E-10    | 62.94772974 |
| TCP11L2      | NM_152772    | 32.22393965 | 1.09081329  | 0.000921484 | 29.54120558 |
| ZNF343       | NM_001282496 | 71.95881691 | 1.224449188 | 8.57E-08    | 58.76831607 |
| ZNF623       | NM_001082480 | 110.6924105 | 2.044977546 | 5.34E-13    | 54.12891241 |
| DCAF17       | NR_028482    | 147.8352676 | 1.280254566 | 1.15E-16    | 115.4733376 |
| ZC3H4        | NM_015168    | 81.85585918 | 3.98512897  | 4.30E-07    | 20.54032875 |
| LOC100270804 | NR_026885    | 53.81467609 | 10.82603747 | 0.004439934 | 4.970856255 |

|              |              |             |             |             |             |
|--------------|--------------|-------------|-------------|-------------|-------------|
| CCNT2        | NR_037649    | 61.3256137  | 1.168061694 | 3.98E-06    | 52.50203307 |
| UBE3A        | NM_000462    | 94.81595977 | 0.757225365 | 5.09E-11    | 125.2149811 |
| C19orf52     | NM_138358    | 109.6319195 | 13.59589636 | 1.77E-06    | 8.063603649 |
| TTC28-AS1    | NR_026963    | 81.59073644 | 0.631553921 | 5.49E-10    | 129.1904519 |
| RSL24D1      | NM_016304    | 46.77477667 | 1.571304756 | 8.74E-05    | 29.76811245 |
| ZBED5        | NM_001143667 | 126.5096539 | 2.585048874 | 3.62E-14    | 48.93897953 |
| RASA1        | NM_002890    | 81.3256137  | 1.055125786 | 5.50E-09    | 77.07670004 |
| CCDC3        | NM_031455    | 29.36679679 | 0.77512968  | 0.002299602 | 37.88630156 |
| SEC24D       | NM_014822    | 137.6731026 | 0.687694856 | 2.94E-16    | 200.1950448 |
| USP18        | NM_017414    | 115.8764507 | 1.741774628 | 3.05E-13    | 66.52780953 |
| GIN1         | NM_017676    | 93.01930787 | 0.532640038 | 9.31E-12    | 174.6382195 |
| RNGTT        | NM_001286426 | 84.18275656 | 0.088780755 | 1.41E-10    | 948.2095113 |
| WDR13        | NM_017883    | 49.36679679 | 4.469452877 | 0.000319823 | 11.04537807 |
| LOC101926941 | NR_120664    | 89.36679679 | 3.162423827 | 2.39E-08    | 28.25895632 |
| CCDC124      | NM_001136203 | 144.1827566 | 5.090978537 | 3.26E-14    | 28.32122656 |
| RANBP2       | NM_006267    | 165.2432475 | 0.934506795 | 5.70E-19    | 176.8240193 |
| POLM         | NM_001284330 | 137.9382254 | 5.341146207 | 1.66E-13    | 25.825585   |
| C17orf70     | NR_033338    | 187.8352676 | 6.044179936 | 3.12E-18    | 31.07704761 |
| EIF5B        | NM_015904    | 122.3861047 | 1.659286214 | 8.39E-13    | 73.7582845  |
| C4orf32      | NM_152400    | 134.8159598 | 1.365971888 | 4.94E-15    | 98.69599873 |
| KLHL9        | NM_018847    | 115.611328  | 4.511519093 | 6.11E-11    | 25.62580931 |
| RBM26        | NM_001286631 | 55.08108251 | 0.536776909 | 1.70E-06    | 102.6144783 |
| MYC          | NM_002467    | 155.611328  | 34.98252773 | 8.05E-07    | 4.448258548 |
| NOL10        | NM_001261394 | 57.67310262 | 1.207957965 | 2.06E-06    | 47.74429597 |
| NFKBIE       | NM_004556    | 84.4478793  | 9.299878446 | 1.65E-06    | 9.080535815 |
| C5orf63      | NM_001164479 | 71.95881691 | 0.261237548 | 9.44E-11    | 275.453576  |
| KATNAL1      | NM_032116    | 36.40669621 | 1.0223585   | 0.000283128 | 35.61049887 |
| FLCN         | NM_144997    | 93.28443061 | 3.291987116 | 8.70E-09    | 28.33681522 |
| NASP         | NM_002482    | 187.0398994 | 3.815831678 | 1.44E-18    | 49.0168108  |
| FOCAD        | NM_017794    | 60.53024548 | 0.917673393 | 1.40E-06    | 65.96055406 |
| RAP1B        | NM_015646    | 75.08108251 | 0.421912971 | 7.14E-10    | 177.9539564 |
| TAF1B        | NM_005680    | 118.2033481 | 0.584493354 | 2.34E-14    | 202.2321506 |
| SPG7         | NM_003119    | 212.7541851 | 4.42363215  | 1.57E-20    | 48.09490887 |
| SERPINB1     | NM_030666    | 47.57014489 | 3.284363025 | 0.000299227 | 14.4838267  |
| ZCCHC7       | NM_001289120 | 148.8365513 | 0.387295833 | 2.19E-17    | 384.2968052 |
| PROS1        | NM_000313    | 80.53024548 | 0.138928205 | 2.70E-11    | 579.6536831 |
| ARHGEF5      | NM_005435    | 232.5482697 | 2.83345576  | 5.92E-26    | 82.07231358 |
| ETS2         | NM_001256295 | 124.713002  | 6.855919884 | 6.17E-11    | 18.19055709 |
| DHDH         | NM_014475    | 209.1016741 | 0.494607855 | 1.90E-32    | 422.762542  |
| MCM4         | NM_005914    | 103.9176338 | 4.874490354 | 1.05E-09    | 21.31866642 |
| ARHGEF17     | NM_014786    | 39.26383906 | 2.093968757 | 0.001137205 | 18.75091924 |
| PLEKHA1      | NM_001001974 | 130.6924105 | 1.860660238 | 9.32E-14    | 70.23980402 |
| TMC7         | NM_001160364 | 30.42728775 | 1.070222461 | 0.00112734  | 28.43080653 |
| TRAFD1       | NM_001143906 | 136.1415735 | 2.949649944 | 9.96E-14    | 46.15516284 |
| NKAP         | NM_024528    | 61.06049096 | 0.943007755 | 6.50E-07    | 64.7507835  |
| TMEM131      | NM_015348    | 82.85714286 | 0.619504935 | 3.04E-09    | 133.7473492 |
| BTG1         | NM_001731    | 155.0810825 | 8.221929105 | 1.25E-13    | 18.86188515 |
| LINC00265    | NR_026999    | 84.71300204 | 0.181664792 | 1.42E-12    | 466.3149143 |
| GAS6-AS1     | NR_044995    | 109.3667968 | 8.831012028 | 4.54E-08    | 12.38440129 |
| TIGD3        | NM_145719    | 137.6731026 | 6.387749875 | 2.44E-12    | 21.55267587 |
| MAML1        | NM_014757    | 87.83526763 | 1.194406006 | 1.80E-09    | 73.53886972 |
| LLGL2        | NM_001015002 | 200.5302455 | 4.20446341  | 8.76E-20    | 47.69461069 |
| LOC100272217 | NR_027440    | 158.2033481 | 12.54568224 | 1.09E-11    | 12.61018293 |
| UGDH-AS1     | NR_047679    | 135.611328  | 1.819803167 | 6.20E-14    | 74.519778   |
| KCNG3        | NM_172344    | 109.6319195 | 0.210351229 | 2.92E-16    | 521.1850689 |
| TLCD2        | NM_001164407 | 80.79536822 | 5.966396911 | 6.41E-07    | 13.54173539 |
| MRPS15       | NM_031280    | 76.40669621 | 2.469791457 | 4.12E-08    | 30.93649708 |
| PRKRIP1      | NM_024653    | 103.6525111 | 3.553857341 | 1.64E-09    | 29.16619919 |
| CLDN23       | NM_194284    | 49.10167405 | 6.462915361 | 0.003376666 | 7.59744965  |
| FAM222A      | NM_032829    | 25.97940845 | 0.10168728  | 0.001095033 | 255.483365  |
| DNMT3A       | NM_175629    | 30.42728775 | 1.189287911 | 0.001242056 | 25.58445895 |
| C11orf31     | NM_170746    | 140.7953682 | 20.05363996 | 9.54E-08    | 7.020938267 |
| RPS15A       | NM_001019    | 110.6924105 | 12.59581585 | 1.01E-07    | 8.788030234 |
| ADPGK        | NR_023319    | 147.8352676 | 3.368801194 | 1.23E-14    | 43.88364261 |

|              |              |             |             |             |             |
|--------------|--------------|-------------|-------------|-------------|-------------|
| FBXL5        | NM_001193535 | 98.2033481  | 0.110838067 | 1.62E-15    | 886.007402  |
| CLDN12       | NM_001185072 | 40.53024548 | 3.595780718 | 0.003224724 | 11.27161211 |
| GART         | NM_001136006 | 83.91763382 | 4.898749604 | 4.18E-07    | 17.13041911 |
| CRTC3        | NM_001042574 | 169.1016741 | 1.005263025 | 5.59E-18    | 168.2163472 |
| NKTR         | NM_005385    | 123.3873883 | 1.177379179 | 1.12E-13    | 104.7983441 |
| EPN2         | NM_148921    | 169.1016741 | 2.201504915 | 4.83E-17    | 76.81185396 |
| CAMK1        | NM_003656    | 126.5096539 | 6.1377225   | 1.41E-11    | 20.61182367 |
| RAB40C       | NM_001172663 | 34.28571429 | 0.404196633 | 0.000180826 | 84.82434405 |
| PSMD4        | NM_002810    | 138.9987163 | 0.847603098 | 9.55E-19    | 163.9903354 |
| PRKX         | NM_005044    | 51.69369417 | 0.42276493  | 3.69E-06    | 122.2752656 |
| GOLGA7       | NM_016099    | 49.63191953 | 0.63091907  | 1.46E-05    | 78.66606335 |
| DTWD1        | NM_001144955 | 183.3873883 | 0.798161635 | 3.82E-25    | 229.762219  |
| SRSF11       | NM_001190987 | 69.10167405 | 3.04969073  | 1.37E-06    | 22.65858415 |
| ABHD10       | NM_001272069 | 115.3462052 | 5.913878497 | 3.73E-10    | 19.5043245  |
| PICALM       | NM_007166    | 61.3256137  | 1.161096287 | 9.39E-07    | 52.81699234 |
| TLN1         | NM_006289    | 86.50965393 | 1.3321735   | 2.90E-09    | 64.93872901 |
| LOC101929224 | NR_110787    | 89.10167405 | 2.615057925 | 2.77E-09    | 34.07254317 |
| ZNF165       | NM_003447    | 109.1016741 | 2.8370292   | 3.13E-12    | 38.45630987 |
| GDAP2        | NM_017686    | 74.81595977 | 1.12777155  | 1.66E-07    | 66.33964099 |
| C2orf42      | NM_017880    | 109.1016741 | 3.995656284 | 7.99E-10    | 27.30506988 |
| PEBP1        | NM_002567    | 103.9176338 | 3.162242693 | 4.06E-11    | 32.86200457 |
| C21orf2      | NM_001271441 | 95.87645073 | 6.334068079 | 1.66E-08    | 15.13663092 |
| MAP3K5       | NM_005923    | 51.95881691 | 0.564859057 | 8.33E-06    | 91.98545418 |
| RHBDD2       | NM_001040457 | 206.5096539 | 7.034646114 | 1.09E-19    | 29.35608282 |
| ACOX1        | NM_004035    | 84.71300204 | 4.396928762 | 1.91E-07    | 19.26640312 |
| RRP15        | NM_016052    | 98.73359358 | 0.963007293 | 5.82E-11    | 102.5263197 |
| LANCL3       | NM_198511    | 27.03989941 | 0.20032137  | 0.002928124 | 134.9826    |
| PDE3B        | NM_000922    | 103.6525111 | 0.133890933 | 2.43E-13    | 774.1563104 |
| KLHDC4       | NM_017566    | 88.89575859 | 0.331832981 | 4.18E-12    | 267.893078  |
| SEC63        | NM_007214    | 106.5096539 | 1.304771059 | 9.90E-11    | 81.63091384 |
| SNRK         | NM_017719    | 111.9588169 | 1.110505854 | 6.45E-12    | 100.8178538 |
| RNF13        | NM_007282    | 235.0810825 | 0.828697428 | 3.04E-27    | 283.6754099 |
| UBE2L3       | NR_046082    | 95.08108251 | 2.187378156 | 1.99E-09    | 43.46805889 |
| GOLGA8B      | NR_027410    | 50.16216501 | 2.002703269 | 7.55E-05    | 25.04722781 |
| MRPL37       | NM_016491    | 115.611328  | 0.705597343 | 1.96E-15    | 163.848871  |
| PPAT         | NM_002703    | 136.1415735 | 0.980833666 | 3.67E-16    | 138.801897  |
| CHAF1B       | NM_005441    | 106.5096539 | 0.215997212 | 1.05E-16    | 493.1066136 |
| DOCK7        | NM_001272002 | 47.03989941 | 0.691038858 | 2.58E-05    | 68.07127974 |
| OSBPL6       | NM_001201480 | 184.1827566 | 0.681514568 | 1.01E-20    | 270.2550541 |
| SLC25A24     | NM_013386    | 157.9382254 | 0.787600207 | 2.51E-18    | 200.5309597 |
| CPSF6        | NM_007007    | 101.060491  | 1.389937386 | 5.14E-11    | 72.7086644  |
| RPL36A       | NM_021029    | 71.95881691 | 10.79738172 | 0.00012058  | 6.664469108 |
| C9orf114     | NM_016390    | 99.26383906 | 6.485484985 | 7.88E-09    | 15.30553833 |
| NEIL2        | NM_145043    | 103.1222656 | 2.501243736 | 1.63E-10    | 41.22839534 |
| GAS8         | NM_001286209 | 85.97940845 | 7.731086612 | 1.23E-06    | 11.12125795 |
| SBF2         | NM_030962    | 141.5907364 | 0.022559062 | 1.25E-21    | 6276.445975 |
| SLC5A3       | NM_006933    | 117.6731026 | 0.987859799 | 6.05E-14    | 119.1192341 |
| ZHX1-C8orf76 | NM_001204180 | 94.81595977 | 2.607450185 | 2.03E-09    | 36.36347889 |
| EP300-AS1    | NR_110514    | 69.10167405 | 3.781139746 | 2.60E-06    | 18.27535576 |
| ZFP62        | NM_001172638 | 124.1827566 | 5.323164316 | 2.42E-11    | 23.32874756 |
| ALAD         | NM_000031    | 92.22393965 | 2.98803708  | 4.65E-09    | 30.86438929 |
| PIGO         | NM_032634    | 106.5096539 | 6.434395944 | 4.80E-09    | 16.55317063 |
| SAP30BP      | NM_013260    | 81.3256137  | 5.036805866 | 8.54E-07    | 16.14626727 |
| MCL1         | NM_182763    | 129.8970423 | 13.53490032 | 3.02E-09    | 9.597192387 |
| ATE1-AS1     | NR_120495    | 121.060491  | 1.139120067 | 1.09E-14    | 106.275444  |
| SLC44A1      | NM_001286730 | 72.75418513 | 0.383289635 | 1.80E-08    | 189.8151645 |
| KIAA1551     | NM_018169    | 86.50965393 | 1.806309442 | 5.30E-09    | 47.89304198 |
| CCDC51       | NM_001256968 | 72.75418513 | 6.907576631 | 8.30E-06    | 10.53251944 |
| CHERP        | NM_006387    | 65.50837026 | 3.166874982 | 1.62E-06    | 20.68549299 |
| RECQL5       | NM_004259    | 47.57014489 | 1.11494816  | 7.95E-05    | 42.66579076 |
| KIF21A       | NM_017641    | 127.3050222 | 0.751491551 | 1.13E-14    | 169.4031316 |
| CDC42SE2     | NM_001038702 | 193.0193079 | 1.526868936 | 5.58E-20    | 126.4151122 |
| COL12A1      | NM_080645    | 56.40669621 | 0.997506162 | 1.86E-06    | 56.54771702 |
| ACOT13       | NM_018473    | 163.6525111 | 2.49435979  | 1.08E-17    | 65.60902391 |

|                 |              |             |             |             |             |
|-----------------|--------------|-------------|-------------|-------------|-------------|
| AFF1            | NM_001166693 | 183.9176338 | 2.225632307 | 7.64E-18    | 82.63612691 |
| ARHGAP19-SLIT1  | NR_037909    | 100.7953682 | 0.792333823 | 2.24E-11    | 127.2132594 |
| SNRPA           | NM_004596    | 104.713002  | 8.858354566 | 3.89E-08    | 11.82081856 |
| COX11           | NR_027942    | 163.6525111 | 9.189464241 | 6.56E-14    | 17.8087108  |
| PPP6R3          | NM_001164162 | 63.38738834 | 2.326382943 | 8.06E-06    | 27.24718582 |
| RSPH3           | NM_031924    | 150.4272878 | 2.353760611 | 2.47E-16    | 63.90934024 |
| TAF11           | NM_001270488 | 101.5907364 | 4.633245116 | 1.49E-09    | 21.9264757  |
| RAB22A          | NM_020673    | 154.2857143 | 1.16332853  | 2.50E-17    | 132.6243708 |
| VPS13D          | NM_018156    | 75.34620525 | 0.57840667  | 2.95E-08    | 130.2651043 |
| NAAA            | NM_001042402 | 116.6718189 | 1.653621886 | 3.87E-13    | 70.55531855 |
| STK38           | NM_007271    | 184.9781248 | 1.377055655 | 4.11E-21    | 134.3287209 |
| TMEM117         | NM_032256    | 107.3050222 | 0.057567608 | 4.40E-14    | 1863.982655 |
| CRCP            | NR_024548    | 76.67181894 | 0.752777857 | 1.23E-08    | 101.8518521 |
| C11orf71        | NM_019021    | 124.1827566 | 4.798665167 | 3.58E-12    | 25.8786042  |
| PLEK2           | NM_016445    | 89.63191953 | 4.694679749 | 6.62E-08    | 19.09223298 |
| FAM189B         | NM_198264    | 69.36679679 | 3.305601511 | 9.23E-07    | 20.98462158 |
| NDUFB4          | NM_004547    | 88.36551311 | 0.923154652 | 6.11E-12    | 95.72124555 |
| ANKHD1-EIF4EBP3 | NM_020690    | 75.87645073 | 1.69583145  | 2.57E-07    | 44.7429199  |
| DEPDC1          | NM_001114120 | 60.26512274 | 3.109294461 | 6.41E-06    | 19.38225006 |
| PIN4            | NM_006223    | 29.89704227 | 0.666429867 | 0.000760067 | 44.8614982  |
| POLR2F          | NM_001301129 | 115.0810825 | 2.412928552 | 3.23E-12    | 47.69353091 |
| KBTBD4          | NR_024222    | 140.7953682 | 8.028635127 | 2.80E-12    | 17.5366505  |
| ZNF543          | NM_213598    | 98.46847084 | 2.381399263 | 1.19E-10    | 41.34899695 |
| LOC100506713    | NR_040089    | 39.26383906 | 3.742869911 | 0.001062464 | 10.49030289 |
| MRPL3           | NM_007208    | 90.42728775 | 0.687612248 | 1.21E-10    | 131.5091288 |
| MTHFD2L         | NM_001144978 | 120.7953682 | 1.010808688 | 2.02E-13    | 119.5036901 |
| SPTAN1          | NM_001130438 | 227.0398994 | 2.765907376 | 2.80E-23    | 82.08514189 |
| SETD6           | NM_001160305 | 149.6319195 | 22.61189323 | 1.65E-08    | 6.617398994 |
| MARVELD2        | NM_001244734 | 172.2239396 | 1.612773574 | 1.03E-20    | 106.7874266 |
| SARS2           | NM_001145901 | 40.05920728 | 5.564234166 | 0.004310671 | 7.199410752 |
| ARIH2           | NM_006321    | 124.4478793 | 2.242714575 | 9.49E-13    | 55.48984283 |
| MFNG            | NM_002405    | 33.28443061 | 1.850444275 | 0.002485253 | 17.98726449 |
| PIDD1           | NM_145887    | 95.61132799 | 8.810597195 | 4.80E-07    | 10.85185554 |
| AFG3L2          | NM_006796    | 175.3462052 | 2.208045678 | 7.84E-19    | 79.4123994  |
| SPAG5-AS1       | NR_040012    | 195.3462052 | 7.021947951 | 1.13E-17    | 27.81937528 |
| CLEC16A         | NM_001243403 | 125.9794085 | 1.669136872 | 3.04E-12    | 75.47578065 |
| KLF10           | NM_005655    | 66.83398396 | 6.545229345 | 2.74E-05    | 10.21109887 |
| PHF20           | NM_016436    | 37.40797988 | 1.221840505 | 0.000333685 | 30.61609084 |
| SLC52A2         | NM_001253816 | 198.4684708 | 13.23557514 | 3.15E-15    | 14.99507719 |
| XPNPEP3         | NM_022098    | 109.1016741 | 1.635638906 | 5.10E-11    | 66.70278731 |
| HSBP1           | NM_001537    | 84.97812478 | 9.596221063 | 3.24E-06    | 8.85537382  |
| MRPS25          | NM_022497    | 204.713002  | 4.815728695 | 3.99E-21    | 42.5092473  |
| STIL            | NM_001282937 | 146.5096539 | 0.531848447 | 3.30E-19    | 275.4725613 |
| UBE2M           | NM_003969    | 122.6512274 | 9.286819312 | 5.80E-10    | 13.20702205 |
| ATG7            | NM_001136031 | 52.48906239 | 0.857339404 | 1.04E-05    | 61.2232007  |
| PTK7            | NM_152882    | 134.8159598 | 0.882959536 | 5.79E-16    | 152.6864531 |
| SPIN4           | NM_001012968 | 74.81595977 | 3.514010597 | 1.66E-07    | 21.290761   |
| ADAT1           | NR_036460    | 104.4478793 | 1.077256682 | 1.12E-12    | 96.95728147 |
| LINC01234       | NR_110025    | 57.67310262 | 1.111007015 | 5.06E-06    | 51.91065568 |
| TOMM22          | NM_020243    | 103.9176338 | 12.86617196 | 7.97E-07    | 8.076810578 |
| AZIN1           | NM_015878    | 250.4272878 | 5.032776748 | 3.44E-24    | 49.75926815 |
| NEDD8-MDP1      | NM_001199823 | 124.1827566 | 7.93744905  | 8.68E-10    | 15.64517212 |
| HNRNPUL2-BSCL2  | NR_037946    | 141.8558592 | 8.966072618 | 3.35E-11    | 15.82140422 |
| PLCE1           | NM_001288989 | 83.65251108 | 0.107329988 | 2.17E-10    | 779.395514  |
| SCAF4           | NM_001145445 | 126.5096539 | 2.277287846 | 8.13E-13    | 55.55277263 |
| NDEL1           | NM_001025579 | 149.3667968 | 1.594870835 | 3.39E-17    | 93.65447879 |
| NOSIP           | NM_001270960 | 193.5495533 | 5.787756362 | 2.44E-18    | 33.4412061  |
| RHBDD1          | NM_001167608 | 112.2239396 | 1.275030394 | 5.82E-11    | 88.016678   |
| ZNF205          | NM_001042428 | 120.7953682 | 3.104374035 | 6.98E-13    | 38.91134472 |
| C1orf50         | NR_040733    | 142.3861047 | 2.340673776 | 1.03E-16    | 60.83124703 |
| DHX8            | NM_004941    | 87.03989941 | 0.158963546 | 1.44E-13    | 547.5462864 |
| UBE2D2          | NM_003339    | 91.95881691 | 1.88132384  | 4.26E-09    | 48.87984457 |
| AP4B1           | NM_001253852 | 89.63191953 | 3.62938738  | 6.10E-09    | 24.69615672 |
| TROAP           | NM_001100620 | 91.95881691 | 10.64164478 | 4.22E-05    | 8.641410121 |



|            |              |             |             |             |             |
|------------|--------------|-------------|-------------|-------------|-------------|
| BRAT1      | NM_152743    | 75.08108251 | 5.134902507 | 1.60E-06    | 14.62171529 |
| DOLPP1     | NM_001135917 | 78.2033481  | 3.487527885 | 1.23E-07    | 22.4237198  |
| NLRP2      | NM_001174082 | 49.10167405 | 2.207246845 | 0.000119038 | 22.24566508 |
| CBX1       | NM_006807    | 102.6512274 | 2.17693195  | 5.89E-11    | 47.15408186 |
| SLC25A37   | NM_016612    | 97.93822536 | 2.532073424 | 7.93E-10    | 38.67906216 |
| BLVRB      | NM_000713    | 141.5907364 | 7.331823423 | 8.36E-13    | 19.31180394 |
| KDELC2     | NM_153705    | 75.34620525 | 1.466518652 | 5.04E-08    | 51.37759766 |
| PSMD13     | NM_175932    | 96.14157347 | 4.96902989  | 3.95E-09    | 19.34815761 |
| CLK3       | NM_001130028 | 58.73359358 | 12.74375855 | 0.00276793  | 4.60881249  |
| ATP8B3     | NR_047593    | 49.63191953 | 2.409786159 | 0.000115037 | 20.59598498 |
| CDA        | NM_001785    | 39.26383906 | 0.968616442 | 0.000518475 | 40.53600307 |
| TMEM68     | NM_152417    | 161.3256137 | 0.669116442 | 5.81E-21    | 241.1024503 |
| PALB2      | NM_024675    | 121.5907364 | 2.402562691 | 5.76E-13    | 50.60876742 |
| ERMP1      | NM_024896    | 149.3667968 | 2.241835664 | 9.64E-16    | 66.62700536 |
| FNTB       | NM_002028    | 60.79536822 | 2.318382493 | 1.21E-05    | 26.22318293 |
| PPP1CC     | NM_001244974 | 140.7953682 | 5.326031717 | 1.44E-12    | 26.4353229  |
| ANKRD6     | NM_014942    | 65.71428571 | 0.526231849 | 1.81E-07    | 124.877059  |
| COQ10B     | NM_025147    | 152.7541851 | 2.918802301 | 5.50E-16    | 52.33454321 |
| NOB1       | NR_074074    | 152.7541851 | 6.273053585 | 1.24E-13    | 24.35084972 |
| ZC2HC1A    | NM_016010    | 229.3667968 | 1.154062212 | 2.41E-27    | 198.7473417 |
| ELAC2      | NM_173717    | 104.713002  | 4.095118691 | 7.91E-10    | 25.57019953 |
| NBPF1      | NM_017940    | 315.935658  | 2.953369017 | 5.24E-34    | 106.9746639 |
| NR1H2      | NM_007121    | 101.060491  | 6.831560259 | 1.54E-08    | 14.79317859 |
| DCP1B      | NM_152640    | 83.91763382 | 0.739922759 | 3.48E-10    | 113.414046  |
| TRPM4      | NM_001195227 | 174.550837  | 3.371487228 | 9.14E-17    | 51.77265261 |
| PPAN       | NM_020230    | 52.22393965 | 3.434404139 | 5.51E-05    | 15.20611365 |
| UFL1       | NM_015323    | 119.7940845 | 0.470603544 | 7.43E-16    | 254.5541486 |
| THAP1      | NM_199003    | 60.53024548 | 7.409723571 | 0.000421494 | 8.16902883  |
| MRPL42     | NR_038161    | 106.5096539 | 1.689084461 | 2.05E-11    | 63.05762465 |
| BPTF       | NM_004459    | 37.14285714 | 1.286738164 | 0.000330021 | 28.86590152 |
| CNIH4      | NM_001277200 | 55.61132799 | 2.233179747 | 1.97E-05    | 24.90230715 |
| COA5       | NM_001008215 | 118.2033481 | 2.629883238 | 1.59E-13    | 44.94623426 |
| MIR181A2HG | NR_038975    | 47.30502215 | 0.40919212  | 1.87E-06    | 115.6058972 |
| CDKN2B     | NM_078487    | 148.1003904 | 1.489952986 | 1.47E-19    | 99.39937151 |
| ABCF3      | NM_018358    | 58.46847084 | 2.851674953 | 1.80E-05    | 20.50320314 |
| WASF1      | NM_003931    | 55.61132799 | 1.431890552 | 3.78E-05    | 38.83769463 |
| ZNF775     | NM_173680    | 63.91763382 | 0.821583098 | 2.24E-07    | 77.79813628 |
| DDX23      | NM_004818    | 61.59073644 | 0.67317278  | 1.92E-07    | 91.49320687 |
| XPA        | NR_027302    | 141.3256137 | 4.740038966 | 1.07E-13    | 29.81528521 |
| PTPN1      | NM_002827    | 101.060491  | 2.27257075  | 7.28E-10    | 44.46967865 |
| RABIF      | NM_002871    | 115.611328  | 9.805263727 | 1.74E-08    | 11.7907413  |
| CDC26      | NM_139286    | 104.1827566 | 6.421763545 | 1.28E-08    | 16.22338721 |
| PPP2R3B    | NM_013239    | 28.83655131 | 0.282497738 | 0.000999748 | 102.0771052 |
| MCAT       | NM_173467    | 137.9382254 | 6.902635219 | 4.33E-12    | 19.98341517 |
| EXOC2      | NR_073064    | 78.2033481  | 0.057915197 | 4.37E-11    | 1350.307898 |
| FARP2      | NM_014808    | 140.5302455 | 2.118431457 | 9.65E-14    | 66.33693293 |
| ORAOV1     | NM_153451    | 90.95753323 | 3.47801087  | 2.04E-09    | 26.15217049 |
| MAPKAPK5   | NM_139078    | 93.01930787 | 1.111135592 | 4.29E-10    | 83.71553256 |
| EMC3       | NM_018447    | 67.30502215 | 1.992944914 | 3.55E-07    | 33.771642   |
| ZBTB49     | NM_145291    | 123.9176338 | 1.362855924 | 3.82E-14    | 90.92496986 |
| GNAQ       | NM_002072    | 29.10167405 | 0.079358157 | 0.001433935 | 366.7130804 |
| RNF135     | NM_001184992 | 157.6731026 | 2.617965288 | 2.65E-16    | 60.22734653 |
| MOB1A      | NM_018221    | 149.8970423 | 2.527444757 | 8.39E-16    | 59.30774229 |
| THUMPD2    | NR_028102    | 140         | 1.093799525 | 3.04E-16    | 127.9942044 |
| RPL36AL    | NM_001001    | 141.3256137 | 19.78637614 | 6.94E-08    | 7.142571875 |
| TUBA4A     | NM_006000    | 167.5701449 | 19.22227394 | 5.42E-11    | 8.717498535 |
| FDPS       | NM_001135822 | 64.18275656 | 7.202789642 | 0.000105021 | 8.910819244 |
| EIF3G      | NM_003755    | 67.03989941 | 12.64682115 | 0.00125943  | 5.300928877 |
| LRRC1      | NM_018214    | 87.03989941 | 0.725038112 | 7.63E-10    | 120.0487229 |
| RABGGTB    | NR_073562    | 152.7541851 | 16.62254555 | 4.67E-10    | 9.189578378 |
| TNPO1      | NM_153188    | 189.3667968 | 1.719311122 | 2.10E-20    | 110.1410876 |
| PCK2       | NM_001291556 | 126.5096539 | 12.93216978 | 7.46E-09    | 9.782554364 |
| PIN1       | NR_038830    | 50.16216501 | 3.358529277 | 0.000224518 | 14.93575338 |
| PEX13      | NM_002618    | 121.3256137 | 1.661978758 | 2.75E-13    | 73.00070058 |

|                |              |             |             |             |             |
|----------------|--------------|-------------|-------------|-------------|-------------|
| TAF12          | NM_005644    | 208.8365513 | 2.105856359 | 1.16E-23    | 99.16941886 |
| RPS3           | NM_001260506 | 155.611328  | 9.870825393 | 1.14E-12    | 15.76477364 |
| ARL5B          | NM_178815    | 115.0810825 | 1.756824506 | 1.49E-13    | 65.50516691 |
| COA3           | NM_001040431 | 93.28443061 | 13.19646928 | 6.56E-05    | 7.068893095 |
| IPO9           | NM_018085    | 84.4478793  | 4.80316362  | 2.73E-07    | 17.58172029 |
| SCARB2         | NM_001204255 | 138.7335936 | 1.638012419 | 5.20E-15    | 84.69630143 |
| RPS6KA4        | NM_003942    | 132.4890624 | 1.122987054 | 8.75E-17    | 117.9791539 |
| ARL6IP1        | NM_015161    | 169.8970423 | 3.092034008 | 3.92E-19    | 54.94669264 |
| TRMT61B        | NM_017910    | 100.5302455 | 1.505608977 | 1.04E-11    | 66.77048755 |
| IQCH           | NM_001031715 | 112.4890624 | 0.130058735 | 1.75E-14    | 864.9097067 |
| MRPS27         | NM_015084    | 90.69241049 | 1.459526106 | 5.19E-09    | 62.13825852 |
| TMEM256-PLSCR3 | NR_037719    | 144.1827566 | 18.62379527 | 9.06E-09    | 7.741856825 |
| PPP1CB         | NM_206876    | 63.38738834 | 0.929084414 | 1.48E-07    | 68.22565034 |
| RIC8A          | NM_021932    | 101.3256137 | 20.57807608 | 2.55E-05    | 4.923959525 |
| CTU1           | NM_145232    | 84.18275656 | 3.486996831 | 3.41E-08    | 24.14190796 |
| CBLN3          | NM_001039771 | 40.79536822 | 4.716089116 | 0.004129037 | 8.65025389  |
| DSTYK          | NM_199462    | 176.1415735 | 0.814408668 | 1.01E-20    | 216.2815555 |
| SLC25A21-AS1   | NR_033240    | 126.5096539 | 20.2742629  | 1.40E-06    | 6.239913854 |
| TMEM249        | NM_001252404 | 160.7953682 | 29.67330663 | 4.23E-07    | 5.41885575  |
| LOC727751      | NR_102748    | 34.28571429 | 1.603368827 | 0.003347353 | 21.38354801 |
| ARID1A         | NM_139135    | 57.67310262 | 2.77830248  | 2.65E-05    | 20.75839583 |
| FLJ31104       | NR_102755    | 143.6525111 | 5.126986476 | 7.30E-14    | 28.01889799 |
| GALNT5         | NM_014568    | 41.3256137  | 0.887373739 | 8.97E-05    | 46.57069718 |
| ARHGFE18       | NM_015318    | 73.54955335 | 0.578787239 | 4.94E-09    | 127.075285  |
| ALAS1          | NM_000688    | 218.4684708 | 6.632223891 | 1.07E-20    | 32.94045473 |
| HOXB6          | NM_018952    | 115.0810825 | 19.36569215 | 1.77E-06    | 5.942523594 |
| RAB28          | NM_001017979 | 105.9794085 | 0.315706059 | 1.95E-13    | 335.6901316 |
| SKAP1          | NM_003726    | 38.99871632 | 0.09785247  | 5.97E-05    | 398.546058  |
| ZNF649         | NM_023074    | 49.63191953 | 1.500941914 | 3.64E-05    | 33.06718206 |
| RPS19BP1       | NM_194326    | 102.1209819 | 6.256606152 | 3.74E-09    | 16.3221049  |
| LOC730102      | NR_037167    | 58.73359358 | 1.698005953 | 4.75E-06    | 34.58974539 |
| SMARCE1        | NM_003079    | 64.71300204 | 1.036898764 | 1.73E-07    | 62.41014483 |
| ZNF174         | NM_001032292 | 82.12098192 | 7.03352019  | 1.73E-06    | 11.6756588  |
| ZSCAN2         | NM_017894    | 114.2857143 | 2.750120569 | 4.79E-13    | 41.55661957 |
| SAP30          | NM_003864    | 123.9176338 | 3.555050727 | 1.81E-13    | 34.85678358 |
| CLNS1A         | NM_001293    | 135.8764507 | 0.971903418 | 8.46E-18    | 139.8044787 |
| ARF4           | NM_001660    | 108.6306359 | 4.473109921 | 4.51E-10    | 24.28525964 |
| CFAP221        | NM_001271049 | 31.69369417 | 0.228525063 | 0.000651647 | 138.6880447 |
| CSTF3-AS1      | NR_034027    | 24.71300204 | 0.496456339 | 0.002379481 | 49.77880252 |
| DCAF7          | NR_073585    | 139.7940845 | 2.568851223 | 1.09E-14    | 54.41891041 |
| MAPRE3         | NM_012326    | 46.77477667 | 2.976984581 | 0.000330052 | 15.71213266 |
| SDHD           | NM_001276506 | 79.26383906 | 3.468215971 | 4.58E-08    | 22.85435501 |
| MRPS28         | NM_014018    | 112.7541851 | 0.604786423 | 2.79E-13    | 186.4363698 |
| CKS2           | NM_001827    | 139.2638391 | 3.915848534 | 3.10E-15    | 35.56415368 |
| FAM46A         | NM_017633    | 147.3050222 | 4.766645175 | 3.00E-15    | 30.90329083 |
| VHL            | NM_000551    | 109.8970423 | 6.685554244 | 1.35E-09    | 16.43798528 |
| RFC5           | NM_001206801 | 49.63191953 | 4.377968799 | 0.000570953 | 11.33674583 |
| TMEM64         | NM_001146273 | 146.5096539 | 1.617464506 | 1.63E-17    | 90.57982628 |
| PSMB2          | NM_002794    | 113.2844306 | 2.244232213 | 6.34E-12    | 50.47803428 |
| PTPDC1         | NM_177995    | 170.4272878 | 0.441587379 | 7.70E-23    | 385.9423884 |
| MACROD1        | NM_014067    | 107.5701449 | 1.321828    | 1.26E-10    | 81.37983529 |
| PLAU           | NM_001145031 | 79.26383906 | 7.733769331 | 3.52E-06    | 10.24905653 |
| WWP1           | NM_007013    | 77.93822536 | 1.674904038 | 2.30E-07    | 46.5329497  |
| C14orf28       | NM_001017923 | 130.162165  | 0.867304346 | 3.98E-18    | 150.0766894 |
| LYRM9          | NM_001076680 | 112.4890624 | 1.630029416 | 1.04E-13    | 69.01044929 |
| SKA3           | NM_145061    | 114.8159598 | 0.055943548 | 1.91E-19    | 2052.353901 |
| ANKRD16        | NM_019046    | 178.4684708 | 2.08075951  | 1.24E-20    | 85.77083032 |
| SLC35C1        | NM_001145266 | 100.5302455 | 22.73326318 | 8.22E-05    | 4.422165208 |
| NELFB          | NM_015456    | 138.4684708 | 2.897939428 | 1.56E-14    | 47.78169948 |
| MSTO2P         | NR_024117    | 203.9768411 | 39.81241999 | 1.28E-09    | 5.123447435 |
| STX2           | NM_001980    | 65.71428571 | 0.696870808 | 3.59E-08    | 94.29909385 |
| TRIM2          | NM_015271    | 93.01930787 | 1.861008611 | 4.45E-09    | 49.98327645 |
| COQ10A         | NM_144576    | 201.5907364 | 12.00956957 | 9.96E-17    | 16.78584193 |
| GLRX           | NM_002064    | 58.73359358 | 5.192574329 | 0.000111406 | 11.31107421 |

|              |              |             |             |             |             |
|--------------|--------------|-------------|-------------|-------------|-------------|
| PYROXD2      | NM_032709    | 150.4272878 | 1.346872469 | 4.78E-18    | 111.6863632 |
| WBSCR22      | NM_001202560 | 120.7953682 | 2.108234541 | 2.23E-13    | 57.29693061 |
| LSM10        | NM_032881    | 127.3050222 | 3.192983821 | 1.36E-14    | 39.87023715 |
| ZNF805       | NM_001145078 | 78.73359358 | 0.142759472 | 1.54E-13    | 551.5122236 |
| GOLGA5       | NM_005113    | 104.4478793 | 0.578537618 | 4.61E-14    | 180.5377491 |
| RABEPK       | NM_001174152 | 191.9588169 | 1.595540676 | 7.75E-23    | 120.3095727 |
| NRD1         | NM_001101662 | 53.28443061 | 1.797361634 | 4.46E-05    | 29.64591521 |
| MFAP3        | NM_001135037 | 139.5289618 | 2.432508402 | 2.96E-15    | 57.36011506 |
| MRM1         | NM_024864    | 110.9575332 | 6.429956541 | 8.24E-10    | 17.25634264 |
| PIK3C3       | NM_002647    | 55.87645073 | 1.094863218 | 2.01E-06    | 51.03509719 |
| KGFLP1       | NR_047527    | 27.03989941 | 0.329952327 | 0.002764992 | 81.95092809 |
| CDH24        | NM_022478    | 115.611328  | 4.055162929 | 3.91E-11    | 28.50966287 |
| BUB3         | NM_004725    | 47.30502215 | 4.84244908  | 0.00047949  | 9.768821804 |
| BET1L        | NM_016526    | 160.7953682 | 17.00380934 | 9.28E-11    | 9.456432084 |
| CDKN1B       | NM_004064    | 47.83526763 | 6.502327236 | 0.001187386 | 7.356638    |
| CDK5RAP3     | NM_001278216 | 53.28443061 | 5.353561812 | 0.000128167 | 9.953080301 |
| CEBPZOS      | NR_037880    | 111.222656  | 8.754750677 | 1.40E-08    | 12.7042631  |
| CHCHD5       | NM_032309    | 91.95881691 | 11.2365365  | 3.18E-06    | 8.183911202 |
| ATP5O        | NM_001697    | 123.9176338 | 3.46237677  | 4.13E-13    | 35.78976005 |
| ZFP41        | NM_001271156 | 111.6936942 | 9.844190546 | 1.11E-08    | 11.34615321 |
| MERTK        | NM_006343    | 123.1222656 | 0.724623124 | 3.24E-14    | 169.9121399 |
| GALNT12      | NM_024642    | 43.91763382 | 1.380575497 | 0.000413984 | 31.81110625 |
| METAP2       | NM_006838    | 160.7953682 | 1.257606499 | 1.15E-18    | 127.8582517 |
| PANK3        | NM_024594    | 116.1415735 | 0.815741705 | 4.92E-15    | 142.3754269 |
| CSAD         | NM_001244705 | 83.1222656  | 4.14565368  | 2.04E-07    | 20.05046056 |
| EIF4A3       | NM_014740    | 288.3655131 | 7.897574312 | 4.69E-28    | 36.51317502 |
| INPP4A       | NM_001134224 | 152.2239396 | 0.945072581 | 4.37E-17    | 161.0711629 |
| TMEM106B     | NM_018374    | 126.7747767 | 2.004087371 | 3.61E-14    | 63.25810865 |
| TMEM86A      | NM_153347    | 61.85585918 | 4.77457055  | 2.60E-05    | 12.9552718  |
| CSPG4        | NM_001897    | 147.3050222 | 3.086222984 | 1.66E-14    | 47.72987011 |
| SLC10A3      | NM_001142391 | 165.9794085 | 8.420679211 | 2.63E-14    | 19.71092881 |
| CCDC125      | NM_001297696 | 158.4684708 | 1.146245709 | 5.58E-18    | 138.2500014 |
| ZNF620       | NM_001256168 | 45.97940845 | 1.377594677 | 5.00E-05    | 33.37658691 |
| SP5          | NM_001003845 | 61.59073644 | 1.149506967 | 1.91E-07    | 53.58013322 |
| LOC101928388 | NR_120334    | 112.2239396 | 3.238517632 | 1.06E-10    | 34.65287282 |
| PGAP3        | NM_001291733 | 74.81595977 | 2.199709241 | 4.77E-08    | 47.81174954 |
| COG7         | NM_153603    | 100.7953682 | 1.156100786 | 1.67E-10    | 87.18562382 |
| EXOC7        | NM_001282313 | 75.61132799 | 4.563872042 | 1.81E-06    | 16.5673637  |
| SLC16A1      | NM_003051    | 172.4890624 | 2.892891071 | 3.92E-18    | 59.62514942 |
| CD99         | NM_002414    | 37.67310262 | 1.069724099 | 0.000209605 | 35.21758804 |
| ZNF484       | NM_001261459 | 95.61132799 | 1.501071453 | 2.88E-10    | 63.69538757 |
| FGFR1OP2     | NM_001171887 | 146.5096539 | 0.585638607 | 7.77E-20    | 250.1707576 |
| NISCH        | NM_007184    | 102.8571429 | 4.365735324 | 3.21E-09    | 23.56009589 |
| HMGN3-AS1    | NR_040671    | 121.060491  | 18.67791535 | 4.99E-07    | 6.481477655 |
| ZFYVE1       | NM_021260    | 51.95881691 | 1.4015427   | 6.15E-05    | 37.0725893  |
| TMEM198B     | NR_036477    | 86.77477667 | 18.78715485 | 0.000309582 | 4.618835442 |
| ZNF687       | NM_020832    | 115.0810825 | 10.48584865 | 1.48E-08    | 10.97489448 |
| NAPG         | NM_003826    | 35.61132799 | 0.913437096 | 0.000266886 | 38.98607592 |
| C18orf8      | NR_075076    | 132.2239396 | 3.229293551 | 6.58E-13    | 40.94515954 |
| ARSD         | NM_001669    | 102.8571429 | 2.118167703 | 3.04E-11    | 48.55948976 |
| EEF1DP3      | NR_027062    | 46.24453119 | 0.01503258  | 9.75E-08    | 3076.287076 |
| SRP68        | NR_048541    | 170.6924105 | 3.61586064  | 4.37E-17    | 47.20657888 |
| SELK         | NM_021237    | 77.67310262 | 3.319520661 | 4.12E-08    | 23.39889115 |
| ZFYVE16      | NM_014733    | 178.9987163 | 0.571329921 | 4.51E-22    | 313.3018413 |
| USE1         | NM_018467    | 101.5907364 | 2.371031993 | 2.81E-11    | 42.8466325  |
| 10-Mar       | NM_001288780 | 31.95881691 | 1.080095595 | 0.001203586 | 29.58887812 |
| HELB         | NM_033647    | 121.8558592 | 0.695711336 | 5.13E-15    | 175.1529017 |
| ATF4         | NM_182810    | 178.7335936 | 38.59485399 | 9.22E-08    | 4.631021369 |
| CARKD        | NM_001242883 | 58.2033481  | 1.318399142 | 5.06E-06    | 44.14698574 |
| CCNT1        | NM_001277842 | 44.18275656 | 3.653977938 | 0.000547403 | 12.09168673 |
| CTSZ         | NM_001336    | 84.18275656 | 8.766540123 | 5.61E-06    | 9.602734417 |
| TMEM9B-AS1   | NR_073431    | 138.4684708 | 6.081003116 | 3.19E-12    | 22.7706627  |
| METTTL20     | NM_001135863 | 41.06049096 | 0.610264058 | 6.76E-05    | 67.28315462 |
| NEDD8        | NM_006156    | 124.1827566 | 4.04076642  | 1.80E-12    | 30.73247588 |

|              |              |             |             |             |             |
|--------------|--------------|-------------|-------------|-------------|-------------|
| RGS9         | NM_001081955 | 38.99871632 | 1.032070412 | 0.000129998 | 37.78687564 |
| LOC143666    | NR_026967    | 96.40669621 | 12.9664857  | 4.23E-06    | 7.435067481 |
| BUD31        | NM_003910    | 130.4272878 | 6.055244716 | 1.06E-11    | 21.53955684 |
| PCGF1        | NM_032673    | 67.83526763 | 15.41801513 | 0.002580566 | 4.399740633 |
| CDC42        | NM_001039802 | 74.55083703 | 2.418471464 | 2.34E-07    | 30.82560127 |
| LAMP2        | NM_013995    | 68.83655131 | 0.245157779 | 2.78E-10    | 280.7846915 |
| ABHD4        | NM_022060    | 82.91635014 | 1.511674521 | 7.19E-10    | 54.85066327 |
| PIGV         | NM_017837    | 116.1415735 | 9.070048492 | 1.34E-09    | 12.80495618 |
| ARMC10       | NM_001161010 | 103.9176338 | 3.080040371 | 7.97E-10    | 33.73904927 |
| NPEPPS       | NM_006310    | 128.8365513 | 2.20264101  | 8.38E-13    | 58.49185171 |
| UVRAG        | NM_003369    | 87.83526763 | 0.424510439 | 6.51E-10    | 206.909559  |
| HAUS5        | NM_015302    | 53.54955335 | 1.051577927 | 2.30E-06    | 50.92304808 |
| SOCS5        | NM_014011    | 43.1222656  | 0.452848639 | 2.59E-05    | 95.22445665 |
| SPIN1        | NM_006717    | 108.5714286 | 0.78774093  | 7.55E-13    | 137.8263137 |
| PUM1         | NM_014676    | 151.6936942 | 1.998740979 | 5.31E-15    | 75.89462354 |
| ANKRD29      | NM_173505    | 40.26512274 | 1.963897027 | 0.00112734  | 20.50266495 |
| HSPB11       | NM_016126    | 113.0193079 | 2.305502242 | 1.27E-12    | 49.02155626 |
| ACADM        | NM_001286043 | 120.5302455 | 2.813865515 | 2.07E-12    | 42.83440158 |
| ZC3H12C      | NM_033390    | 38.2033481  | 1.171602594 | 0.000269236 | 32.60777015 |
| NPHP3-ACAD11 | NR_037804    | 92.22393965 | 1.429361245 | 8.31E-09    | 64.52108589 |
| TGDS         | NM_014305    | 187.0398994 | 1.50672666  | 2.27E-22    | 124.1365832 |
| SPOPL        | NM_001001664 | 61.06049096 | 1.707427777 | 9.83E-06    | 35.76168302 |
| C8orf37      | NM_177965    | 172.7541851 | 3.211231386 | 5.26E-18    | 53.79686618 |
| C2orf70      | NM_001105519 | 38.46847084 | 0.337067346 | 1.82E-05    | 114.1269579 |
| MRPL44       | NM_022915    | 98.46847084 | 2.112393391 | 7.18E-11    | 46.61464634 |
| LOC100507283 | NR_103862    | 241.060491  | 1.199335153 | 7.11E-31    | 200.9951017 |
| UBXN1        | NM_001286077 | 81.85585918 | 18.92047509 | 0.001012651 | 4.326310983 |
| CCNH         | NM_001199189 | 137.4079799 | 1.300123947 | 1.87E-17    | 105.6883693 |
| EGFR         | NM_201284    | 120.2651227 | 2.927031772 | 1.68E-11    | 41.08774079 |
| SECISBP2     | NM_024077    | 184.4478793 | 1.164409164 | 2.25E-22    | 158.4046957 |
| POLE         | NM_006231    | 44.4478793  | 1.768046104 | 0.000288367 | 25.13954766 |
| LINC01521    | NR_120386    | 67.03989941 | 15.71825967 | 0.003317718 | 4.265096824 |
| CALM2        | NM_001743    | 151.9588169 | 3.97087559  | 6.42E-16    | 38.26833994 |
| TBC1D7       | NM_001258457 | 215.3462052 | 0.836108351 | 6.28E-30    | 257.5577735 |
| RPIA         | NM_144563    | 92.22393965 | 0.995260749 | 1.04E-09    | 92.66309331 |
| HSPE1-MOB4   | NM_001202485 | 47.30502215 | 5.133696171 | 0.000949244 | 9.214612742 |
| COA4         | NM_016565    | 146.5096539 | 4.43549283  | 8.05E-15    | 33.03120071 |
| C5orf51      | NM_175921    | 89.89704227 | 0.713373984 | 1.38E-11    | 126.0167097 |
| REEP3        | NM_001001330 | 85.97940845 | 0.492641041 | 2.29E-10    | 174.5274982 |
| NECAP2       | NM_001145278 | 106.5096539 | 2.718068    | 1.31E-10    | 39.18579444 |
| ARFGEF1      | NM_006421    | 92.75418513 | 0.977090966 | 3.18E-10    | 94.9289149  |
| SRRT         | NM_015908    | 83.38738834 | 6.819423149 | 1.09E-06    | 12.22792405 |
| ZFC3H1       | NM_144982    | 97.67310262 | 2.558996433 | 1.14E-09    | 38.16851847 |
| REEP4        | NM_025232    | 127.0398994 | 13.75151269 | 9.63E-09    | 9.23824908  |
| KIAA0319L    | NM_024874    | 157.9382254 | 1.083762803 | 2.04E-16    | 145.7313583 |
| KIAA1033     | NM_001293640 | 127.8352676 | 0.636645814 | 1.77E-16    | 200.7949551 |
| SH2D3A       | NM_005490    | 129.6319195 | 8.231781962 | 1.63E-10    | 15.74773483 |
| LOC642366    | NR_046243    | 95.08108251 | 2.030900832 | 1.81E-10    | 46.81719611 |
| SRPK1        | NM_003137    | 143.9176338 | 0.945883255 | 1.72E-15    | 152.1515822 |
| RIOK1        | NM_031480    | 84.4478793  | 1.21912977  | 1.29E-09    | 69.26898301 |
| TACC1        | NM_006283    | 143.9176338 | 1.62333936  | 4.23E-15    | 88.65529746 |
| SCRN1        | NM_001145514 | 43.65251108 | 1.017669514 | 5.44E-05    | 42.89458461 |
| ZNF778       | NM_182531    | 128.1003904 | 1.56164784  | 9.73E-16    | 82.02898703 |
| KCTD13       | NM_178863    | 73.54955335 | 6.413151016 | 1.11E-05    | 11.4685516  |
| HDAC5        | NM_005474    | 63.1222656  | 5.097121659 | 4.27E-05    | 12.38390406 |
| XK           | NM_021083    | 70.16216501 | 0.862022626 | 9.00E-09    | 81.39248659 |
| IFNAR1       | NM_000629    | 124.1827566 | 2.622827175 | 5.76E-13    | 47.34690785 |
| GTF2IRD2     | NM_001281447 | 78.46847084 | 2.966073882 | 5.38E-08    | 26.45533253 |
| NTN4         | NM_021229    | 35.87645073 | 0.303183718 | 0.000175863 | 118.3323794 |
| MED26        | NM_004831    | 66.77477667 | 2.325291057 | 2.49E-06    | 28.71673912 |
| NKAPP1       | NR_027131    | 83.38738834 | 2.615820053 | 7.99E-09    | 31.87810577 |
| TTC5         | NM_138376    | 30.69241049 | 0.826607665 | 0.002908802 | 37.13056605 |
| BBS5         | NM_152384    | 32.48906239 | 0.037702589 | 1.75E-05    | 861.7196768 |
| NR1D2        | NM_001145425 | 100.7953682 | 1.290378874 | 3.92E-11    | 78.11300251 |

|              |              |             |             |             |             |
|--------------|--------------|-------------|-------------|-------------|-------------|
| SYN2         | NM_133625    | 215.0810825 | 0.533721493 | 2.13E-25    | 402.9837381 |
| TBCB         | NM_001281    | 123.3873883 | 6.575793055 | 1.47E-10    | 18.76387947 |
| AKIRIN1      | NM_001136275 | 154.8159598 | 4.278303995 | 2.39E-15    | 36.1862925  |
| EML1         | NM_001008707 | 29.36679679 | 0.689617715 | 0.002413563 | 42.58416824 |
| NINL         | NM_025176    | 132.7541851 | 0.893302203 | 5.89E-15    | 148.6106098 |
| FAM84B       | NM_174911    | 142.3861047 | 6.585638642 | 2.82E-13    | 21.62069807 |
| COMMD10      | NM_016144    | 99.5289618  | 0.357613277 | 9.46E-12    | 278.3145037 |
| SYNM         | NM_145728    | 135.611328  | 1.192993751 | 4.64E-16    | 113.6731252 |
| L3MBTL3      | NM_001007102 | 66.50965393 | 0.91977078  | 1.94E-07    | 72.31111861 |
| MB21D2       | NM_178496    | 115.3462052 | 0.377912034 | 3.22E-14    | 305.21972   |
| LONP2        | NM_001300948 | 43.65251108 | 1.515159198 | 0.00063496  | 28.81051123 |
| METTL5       | NM_001293187 | 150.4272878 | 4.246635877 | 2.99E-15    | 35.42269507 |
| SLC39A11     | NM_001159770 | 130.162165  | 1.56143993  | 1.69E-12    | 83.360341   |
| CHMP2A       | NM_198426    | 135.0810825 | 22.51821739 | 3.64E-07    | 5.998746711 |
| MORN2        | NM_001145450 | 30.42728775 | 1.599181202 | 0.002135383 | 19.02679178 |
| VPS39        | NM_001301138 | 75.87645073 | 1.845017782 | 1.05E-07    | 41.12505118 |
| TFG          | NM_001195478 | 93.01930787 | 0.736817506 | 5.54E-11    | 126.2447039 |
| COPS6        | NM_006833    | 115.3462052 | 18.67890584 | 2.02E-06    | 6.175212093 |
| TANK         | NM_133484    | 44.18275656 | 1.846114002 | 0.000585888 | 23.93284299 |
| TRRAP        | NM_001244580 | 24.97812478 | 0.863634765 | 0.004993507 | 28.92209275 |
| IQSEC2       | NM_001111125 | 215.3462052 | 1.758732022 | 1.84E-11    | 65.58486671 |
| GTF2E2       | NM_002095    | 163.9176338 | 0.305589048 | 9.28E-23    | 536.3989156 |
| ATG16L2      | NM_033388    | 190.162165  | 11.9342687  | 4.07E-15    | 15.934128   |
| AHSA1        | NM_012111    | 173.2844306 | 3.703948405 | 5.42E-19    | 46.78370529 |
| GPHN         | NM_020806    | 98.2033481  | 0.177187851 | 5.46E-11    | 554.2329648 |
| ZBTB44       | NM_014155    | 57.40797988 | 0.846262945 | 1.26E-06    | 67.83704783 |
| TRMT12       | NM_017956    | 113.0193079 | 6.955446571 | 1.20E-09    | 16.24903688 |
| CTC-436P18.1 | NR_109908    | 118.4684708 | 1.983918727 | 7.15E-12    | 59.71437702 |
| RRP7A        | NM_015703    | 84.4478793  | 15.7838056  | 5.74E-05    | 5.350286326 |
| SQSTM1       | NM_003900    | 191.4877787 | 8.82707537  | 4.95E-17    | 21.69323028 |
| BRD9         | NM_023924    | 117.6731026 | 3.571812218 | 3.91E-11    | 32.94492975 |
| VCP          | NM_007126    | 93.01930787 | 7.105312115 | 9.96E-08    | 13.09151609 |
| RUVBL2       | NM_006666    | 63.65251108 | 3.827068576 | 2.31E-05    | 16.63218461 |
| FAM89A       | NM_198552    | 120.2651227 | 0.670516958 | 3.64E-16    | 179.3617913 |
| LOC100131564 | NR_034089    | 136.4066962 | 1.009131947 | 1.84E-16    | 135.1723098 |
| GATAD1       | NM_021167    | 140         | 4.930055843 | 1.26E-13    | 28.39724426 |
| FOXO3        | NM_001455    | 89.36679679 | 1.133026817 | 6.51E-10    | 78.87438802 |
| SMEK1        | NM_001284280 | 155.0810825 | 2.352491694 | 3.36E-16    | 65.92205315 |
| METTL1       | NM_005371    | 121.5907364 | 4.679275548 | 7.11E-12    | 25.98494899 |
| RARS2        | NM_020320    | 93.28443061 | 1.083440775 | 9.74E-10    | 86.10016603 |
| EIF4A2       | NM_001967    | 187.0398994 | 25.96326596 | 4.88E-11    | 7.204020468 |
| GAPDH        | NM_001289745 | 232.4890624 | 44.00422538 | 5.79E-11    | 5.283334962 |
| RAB2B        | NM_032846    | 40.26512274 | 2.492598088 | 0.000713179 | 16.15387693 |
| TRMT13       | NM_019083    | 92.22393965 | 0.113776771 | 1.08E-14    | 810.569141  |
| OTUD1        | NM_001145373 | 61.3256137  | 5.862264347 | 9.01E-05    | 10.46107955 |
| UBA5         | NM_024818    | 203.6525111 | 0.368771655 | 5.70E-31    | 552.2455651 |
| PEX3         | NM_003630    | 100.7953682 | 0.553444788 | 3.11E-12    | 182.1236201 |
| ENPP1        | NM_006208    | 29.36679679 | 0.269102652 | 0.001361831 | 109.128604  |
| RAD51AP2     | NM_001099218 | 80.53024548 | 0.41827665  | 3.18E-12    | 192.5286661 |
| FAM120C      | NM_017848    | 57.67310262 | 0.087523239 | 3.53E-08    | 658.9461625 |
| TSEN2        | NM_001145395 | 96.14157347 | 1.785424645 | 4.54E-10    | 53.84801521 |
| CMTR1        | NM_015050    | 97.93822536 | 1.196225056 | 2.01E-10    | 81.87274199 |
| LYAR         | NM_001145725 | 97.93822536 | 3.712929629 | 4.26E-09    | 26.37761422 |
| LOC101928222 | NR_110235    | 120.5302455 | 3.638817097 | 2.26E-12    | 33.12346905 |
| SLC29A2      | NM_001532    | 125.9794085 | 20.03556156 | 1.82E-07    | 6.287790242 |
| FAM72B       | NM_001100910 | 64.4478793  | 1.738207243 | 3.28E-07    | 37.07721248 |
| SEMA6A       | NM_001300780 | 89.10167405 | 0.279872066 | 4.02E-11    | 318.3657282 |
| SMEK2        | NM_001122964 | 69.89704227 | 0.451222695 | 1.32E-08    | 154.9058658 |
| PLAGL2       | NM_002657    | 88.83655131 | 2.39062537  | 6.10E-09    | 37.16038173 |
| CCDC22       | NM_014008    | 108.8365513 | 1.10152936  | 4.12E-14    | 98.80494819 |
| CMBL         | NM_138809    | 54.55083703 | 0.619829047 | 4.00E-07    | 88.0094879  |
| CPT2         | NM_000098    | 47.03989941 | 6.908181091 | 0.004807164 | 6.809303171 |
| CTBP1-AS2    | NR_033339    | 53.28443061 | 6.033583826 | 0.000587772 | 8.831306922 |
| NPLOC4       | NM_017921    | 186.5096539 | 4.045473835 | 2.69E-17    | 46.10329013 |

|              |              |             |             |             |             |
|--------------|--------------|-------------|-------------|-------------|-------------|
| NDOR1        | NM_001144026 | 84.18275656 | 11.30693417 | 2.91E-05    | 7.445232747 |
| ARPC1A       | NM_006409    | 132.2239396 | 1.579842646 | 1.49E-14    | 83.69437296 |
| ENTPD7       | NM_020354    | 161.8558592 | 1.088618235 | 7.48E-19    | 148.6800918 |
| PPP2R5D      | NM_001270476 | 126.5096539 | 4.748684469 | 7.75E-12    | 26.64098968 |
| ZNF212       | NM_012256    | 76.40669621 | 0.306266801 | 4.35E-11    | 249.4775663 |
| UQCRC1       | NM_003365    | 138.2033481 | 3.654012999 | 3.22E-14    | 37.82234714 |
| VWDE         | NM_001135924 | 107.5701449 | 1.359807361 | 3.26E-11    | 79.10689997 |
| EFNA3        | NM_004952    | 169.3667968 | 21.69937273 | 2.60E-10    | 7.805147132 |
| KIF20B       | NM_001284259 | 64.97812478 | 0.267781746 | 1.07E-08    | 242.6533018 |
| SOAT1        | NM_003101    | 109.8970423 | 0.579607001 | 7.98E-14    | 189.6061334 |
| CYB5D1       | NM_144607    | 64.18275656 | 6.420303518 | 0.000103634 | 9.996841485 |
| SCRN3        | NM_001193528 | 55.34620525 | 0.988397861 | 1.18E-05    | 55.9958772  |
| CRAT         | NM_001257363 | 73.28443061 | 5.751431033 | 8.12E-06    | 12.74194721 |
| LRBA         | NM_006726    | 200.2651227 | 0.498246914 | 3.44E-21    | 401.9395144 |
| MINPP1       | NM_004897    | 90.69241049 | 3.154163018 | 5.49E-09    | 28.75324134 |
| ECSIT        | NM_001142464 | 50.16216501 | 2.69285438  | 5.04E-05    | 18.6278788  |
| LRRC42       | NM_052940    | 83.38738834 | 1.938306448 | 5.29E-09    | 43.02074547 |
| HMGN1        | NM_004965    | 77.40797988 | 4.690474897 | 6.88E-07    | 16.50322869 |
| PFAS         | NM_012393    | 90.42728775 | 2.284498639 | 6.19E-10    | 39.58299042 |
| TNFRSF18     | NM_004195    | 101.060491  | 15.59729527 | 1.12E-05    | 6.479359994 |
| TRIM6        | NM_001198644 | 27.03989941 | 0.174469548 | 0.000538626 | 154.9834895 |
| BAG3         | NM_004281    | 170.162165  | 3.661870531 | 1.58E-17    | 46.46864589 |
| EXOC3        | NM_007277    | 46.77477667 | 0.662254247 | 4.73E-06    | 70.62963636 |
| CTTNBP2      | NM_033427    | 83.91763382 | 0.936360992 | 3.13E-09    | 89.6210271  |
| ENO4         | NM_001242699 | 130.162165  | 3.701419811 | 1.50E-12    | 35.16546938 |
| CBY1         | NM_015373    | 98.2033481  | 2.270995199 | 5.74E-11    | 43.24242876 |
| GMPPA        | NM_013335    | 147.5701449 | 2.615962759 | 2.03E-17    | 56.41140892 |
| ZNF274       | NM_016324    | 68.83655131 | 0.605622186 | 3.13E-09    | 113.6625323 |
| GLTP         | NM_016433    | 97.40797988 | 0.219736289 | 1.62E-15    | 443.294916  |
| VPS13A       | NM_001018038 | 126.2445312 | 0.993331648 | 8.90E-14    | 127.0920256 |
| LOC101928131 | NR_121677    | 23.91763382 | 0.098941206 | 0.000654913 | 241.7358234 |
| C4orf3       | NM_001001701 | 143.3873883 | 10.61408452 | 1.39E-11    | 13.5091621  |
| MMS22L       | NM_198468    | 69.63191953 | 1.017116887 | 1.13E-07    | 68.46009582 |
| CHD1L        | NM_001256338 | 107.3050222 | 0.822021045 | 2.85E-12    | 130.5380474 |
| C5orf45      | NM_001017987 | 171.222656  | 6.58673354  | 7.74E-16    | 25.99507858 |
| SMCHD1       | NM_015295    | 131.9588169 | 0.616653371 | 2.72E-15    | 213.9918846 |
| BCAT2        | NM_001190    | 144.1827566 | 5.48206512  | 2.22E-13    | 26.30081062 |
| PSMD11       | NM_002815    | 101.3256137 | 1.00628376  | 2.65E-11    | 100.6928838 |
| TBC1D22B     | NM_017772    | 114.8159598 | 0.59267597  | 2.70E-14    | 193.7246752 |
| DGCR6L       | NM_033257    | 180.5302455 | 2.624218185 | 4.34E-21    | 68.79391604 |
| MEF2D        | NM_005920    | 54.28571429 | 3.637957612 | 4.11E-05    | 14.92203046 |
| SLC35E2      | NM_182838    | 102.3861047 | 5.585941655 | 1.01E-08    | 18.32924706 |
| BACH2        | NM_001170794 | 43.38738834 | 0.501938459 | 7.96E-05    | 86.43965721 |
| RAB11FIP2    | NM_014904    | 80.53024548 | 1.602280651 | 3.03E-08    | 50.25976282 |
| GAK          | NM_005255    | 170.6924105 | 0.053408496 | 2.17E-29    | 3195.978596 |
| BANF1        | NM_003860    | 166.7747767 | 31.46474411 | 1.46E-07    | 5.300369711 |
| GATA6        | NM_005257    | 101.060491  | 2.095098547 | 1.40E-10    | 48.23662882 |
| SP100        | NM_001080391 | 77.93822536 | 0.039603371 | 2.28E-12    | 1967.969465 |
| USP4         | NM_001251877 | 121.5907364 | 0.935083045 | 3.50E-15    | 130.0320191 |
| RWDD1        | NM_015952    | 82.12098192 | 0.59794609  | 1.38E-10    | 137.3384377 |
| TRA2A        | NM_001282758 | 153.2844306 | 4.063529398 | 2.88E-15    | 37.72199377 |
| LDLR         | NM_001195799 | 83.91763382 | 6.747712651 | 2.97E-06    | 12.43645635 |
| LAP3         | NM_015907    | 87.03989941 | 2.405371452 | 7.80E-09    | 36.1856375  |
| RAP1GDS1     | NM_001100429 | 68.57142857 | 0.301511459 | 3.72E-08    | 227.4256138 |
| TBC1D8       | NM_001102426 | 183.1222656 | 3.563594271 | 9.18E-18    | 51.386957   |
| SLC25A20     | NM_000387    | 22.12098192 | 0.132904958 | 0.002923898 | 166.4421123 |
| DNAL1        | NM_001201366 | 53.54955335 | 0.071931593 | 1.12E-08    | 744.4510933 |
| ZFAS1        | NR_036659    | 164.713002  | 28.53653632 | 1.13E-08    | 5.77200401  |
| MAPK1IP1L    | NM_144578    | 149.8970423 | 4.713564745 | 4.86E-14    | 31.80120575 |
| GTF2IRD1P1   | NR_003934    | 114.3449216 | 0.487928199 | 7.59E-15    | 234.3478442 |
| DPF2         | NM_006268    | 106.7747767 | 1.401144654 | 1.12E-12    | 76.20539135 |
| RIMKLA       | NM_173642    | 74.55083703 | 1.904108397 | 1.91E-07    | 39.15262238 |
| SLC38A10     | NM_001037984 | 201.8558592 | 1.551684654 | 3.73E-23    | 130.0881971 |
| LYRM1        | NM_001128301 | 108.3655131 | 4.955690295 | 4.73E-10    | 21.86688567 |

|           |              |             |             |             |             |
|-----------|--------------|-------------|-------------|-------------|-------------|
| TLK2      | NM_006852    | 46.50965393 | 1.68757975  | 0.000356693 | 27.55997394 |
| LARP6     | NM_197958    | 117.9382254 | 9.342678628 | 6.45E-09    | 12.62359865 |
| SNX19     | NM_014758    | 97.14285714 | 2.108435065 | 4.90E-10    | 46.07344032 |
| ZNF511    | NM_145806    | 95.08108251 | 2.274758987 | 5.38E-11    | 41.79831052 |
| TTC17     | NM_018259    | 107.0398994 | 0.6897334   | 3.47E-12    | 155.1902508 |
| SOWAHB    | NM_001029870 | 53.54955335 | 1.176675647 | 4.45E-06    | 45.5091881  |
| PYCR1     | NM_001282281 | 138.4684708 | 20.26324914 | 4.44E-08    | 6.833478178 |
| RBM25     | NM_021239    | 183.3873883 | 1.925168873 | 1.37E-19    | 95.25781916 |
| SLC27A6   | NM_014031    | 67.03989941 | 0.248135923 | 7.02E-09    | 270.1740991 |
| LINC00659 | NR_046224    | 120.7953682 | 14.3611395  | 1.42E-07    | 8.411266265 |
| FASTK     | NM_001258461 | 118.4684708 | 19.60130502 | 2.34E-06    | 6.043907317 |
| SPATA5    | NM_145207    | 78.46847084 | 0.094950103 | 1.43E-09    | 826.4179617 |
| BBS2      | NM_031885    | 155.8764507 | 2.16728215  | 2.16E-17    | 71.92254628 |
| PAFAH1B3  | NM_001145940 | 89.10167405 | 11.94620838 | 1.07E-05    | 7.458573568 |
| CHMP4C    | NM_152284    | 202.3861047 | 2.651802055 | 3.42E-22    | 76.32021564 |
| PPP2R2A   | NM_002717    | 48.57142857 | 1.418501843 | 0.000148321 | 34.2413574  |
| MSMO1     | NM_001017369 | 107.0398994 | 3.076023999 | 9.57E-11    | 34.79813533 |
| CEP164    | NM_014956    | 141.060491  | 1.215997633 | 8.36E-15    | 116.003919  |
| ART5      | NM_001297668 | 85.97940845 | 3.462951739 | 1.78E-08    | 24.82835885 |
| MTFP1     | NM_016498    | 68.83655131 | 13.07285202 | 0.001255321 | 5.26561084  |
| DRAM2     | NM_178454    | 78.99871632 | 2.794693126 | 2.79E-08    | 28.26740281 |
| RAB11A    | NM_004663    | 136.1415735 | 3.093059566 | 5.18E-14    | 44.01517998 |
| N4BP2L2   | NM_033111    | 46.50965393 | 1.677023828 | 0.000335774 | 27.73344849 |
| TRIM68    | NM_018073    | 132.4890624 | 2.997313842 | 3.98E-14    | 44.20259918 |
| TM9SF4    | NM_014742    | 67.57014489 | 2.381841464 | 1.35E-06    | 28.3688675  |
| FNBP1L    | NM_017737    | 124.4478793 | 1.392704533 | 9.35E-13    | 89.35698588 |
| SLC35B4   | NM_032826    | 55.61132799 | 1.93179834  | 2.09E-05    | 28.78733604 |
| STRN4     | NM_013403    | 43.65251108 | 3.906137018 | 0.002498978 | 11.17536607 |
| PPAP2B    | NM_003713    | 89.63191953 | 1.191299401 | 6.38E-09    | 75.23878501 |
| AIP       | NM_003977    | 36.14157347 | 3.571389663 | 0.004760195 | 10.11975082 |
| PFKFB4    | NM_004567    | 61.59073644 | 0.672718316 | 4.95E-08    | 91.55501638 |
| PTPN14    | NM_005401    | 109.3667968 | 0.117852103 | 1.25E-14    | 928.000387  |
| WDR24     | NM_032259    | 150.162165  | 7.079868146 | 1.32E-13    | 21.20974034 |
| SETD7     | NM_030648    | 116.4066962 | 2.532705231 | 6.05E-12    | 45.9614071  |
| ZSCAN9    | NM_006299    | 76.40669621 | 3.022078698 | 5.96E-08    | 25.28282809 |
| ELL3      | NM_025165    | 146.2445312 | 26.94377168 | 3.10E-07    | 5.427767608 |
| PPP2R5B   | NM_006244    | 70.16216501 | 4.295366956 | 1.03E-06    | 16.33438207 |
| LMAN2L    | NR_024519    | 78.2033481  | 1.749393623 | 5.38E-08    | 44.70311718 |
| TFCP2     | NM_005653    | 75.61132799 | 0.676380954 | 6.83E-09    | 111.7880797 |
| IMMP1L    | NM_144981    | 55.87645073 | 0.423724456 | 4.47E-07    | 131.8697797 |
| IRF5      | NM_001242452 | 109.8970423 | 3.822554198 | 3.62E-11    | 28.74963612 |
| THOC2     | NM_001081550 | 52.22393965 | 0.532620857 | 5.53E-06    | 98.05087238 |
| PVRL3     | NM_015480    | 29.10167405 | 0.827785779 | 0.00205032  | 35.15604493 |
| SERINC1   | NM_020755    | 63.65251108 | 0.853839949 | 5.62E-07    | 74.54852764 |
| CHMP4B    | NM_176812    | 137.9382254 | 1.733967283 | 5.51E-15    | 79.55065051 |
| UBE2T     | NM_014176    | 107.3050222 | 3.903785336 | 1.71E-10    | 27.48742897 |
| GLTSCR1   | NM_015711    | 135.0810825 | 2.594698453 | 2.88E-13    | 52.06041664 |
| ARMCX6    | NM_001009584 | 43.38738834 | 4.130961387 | 0.001586723 | 10.50297601 |
| C5orf56   | NR_045116    | 75.87645073 | 1.175744991 | 8.14E-08    | 64.53478546 |
| GNAI3     | NM_006496    | 167.0398994 | 1.063769801 | 1.60E-19    | 157.0263597 |
| ZNF799    | NM_001080821 | 109.3667968 | 0.693350353 | 1.57E-15    | 157.7367002 |
| RHOB      | NM_004040    | 170.4272878 | 21.54182473 | 2.86E-10    | 7.911460143 |
| ZNF8      | NM_021089    | 73.54955335 | 0.151957591 | 3.13E-11    | 484.0136839 |
| SMIM20    | NM_001145432 | 117.9382254 | 0.647324946 | 1.80E-16    | 182.193234  |
| MRC2      | NM_006039    | 84.71300204 | 0.12328558  | 4.15E-13    | 687.1282249 |
| LOC414300 | NR_121211    | 173.0193079 | 3.211426683 | 5.00E-20    | 53.87615067 |
| CACYBP    | NM_014412    | 55.61132799 | 6.231653151 | 0.000653551 | 8.924008868 |
| RBBP4     | NM_001135255 | 84.18275656 | 3.416469646 | 3.43E-08    | 24.64027645 |
| TERF2IP   | NM_018975    | 72.48906239 | 4.071870981 | 8.93E-07    | 17.80239667 |
| SURF2     | NM_017503    | 95.34620525 | 15.75992829 | 2.99E-05    | 6.049913649 |
| NDUFB6    | NM_182739    | 91.95881691 | 2.273056826 | 4.89E-10    | 40.45601318 |
| SETD3     | NM_199123    | 66.24453119 | 1.108293825 | 1.33E-07    | 59.77163248 |
| SNX16     | NM_152836    | 86.77477667 | 1.479520529 | 5.86E-09    | 58.65060672 |
| SLC25A30  | NM_001286807 | 98.73359358 | 1.570411945 | 2.65E-11    | 62.87114277 |

|                |              |             |             |             |             |
|----------------|--------------|-------------|-------------|-------------|-------------|
| GGNBP2         | NM_024835    | 194.8159598 | 3.661973929 | 4.14E-19    | 53.19971238 |
| SNHG21         | NR_110097    | 112.7541851 | 2.16048811  | 9.24E-13    | 52.18921807 |
| COBL           | NM_015198    | 74.55083703 | 0.092691088 | 1.60E-09    | 804.2934685 |
| LIN7B          | NM_022165    | 68.83655131 | 14.43149088 | 0.001700384 | 4.76988496  |
| SCOC           | NM_001153484 | 61.3256137  | 2.42005264  | 7.24E-06    | 25.34061148 |
| BCL2L2         | NM_001199839 | 132.2239396 | 4.886885101 | 5.55E-13    | 27.05689553 |
| ATP6V1A        | NM_001690    | 132.7541851 | 0.330837966 | 2.41E-18    | 401.2664777 |
| ITPR3          | NM_002224    | 123.3873883 | 4.628096099 | 6.98E-11    | 26.66050698 |
| BRD8           | NM_006696    | 49.36679679 | 2.760612299 | 1.00E-04    | 17.88255338 |
| WASH2P         | NR_024077    | 59.79408454 | 3.800354107 | 3.21E-05    | 15.73381923 |
| DCTN3          | NM_001281426 | 52.48906239 | 5.088378927 | 0.00065497  | 10.3154783  |
| HINT1          | NM_005340    | 146.7747767 | 3.583758976 | 6.24E-16    | 40.95553793 |
| FYTTD1         | NM_001011537 | 108.8365513 | 2.661973268 | 2.76E-11    | 40.88566652 |
| RABEP2         | NM_024816    | 63.38738834 | 3.52811287  | 2.02E-05    | 17.96637202 |
| NAPIL4         | NM_005969    | 46.77477667 | 3.241520859 | 0.000322475 | 14.42988607 |
| SPRYD7         | NM_001127482 | 64.97812478 | 2.445819253 | 1.12E-06    | 26.56701827 |
| E2F4           | NM_001950    | 127.3050222 | 8.48338148  | 7.82E-11    | 15.00640074 |
| C7orf55-LUC7L2 | NM_001244584 | 64.4478793  | 4.123684084 | 2.57E-05    | 15.62871403 |
| PHB            | NM_001281496 | 124.4478793 | 3.267590919 | 6.02E-13    | 38.08551387 |
| VAPA           | NM_194434    | 118.2033481 | 1.927322811 | 2.48E-12    | 61.33033213 |
| WAPAL          | NM_015045    | 104.1827566 | 1.476163567 | 2.36E-10    | 70.57670226 |
| LDB1           | NM_001113407 | 92.48906239 | 9.630372645 | 9.82E-07    | 9.603892372 |
| NAPEPLD        | NM_198990    | 95.61132799 | 0.422334334 | 8.78E-13    | 226.3877696 |
| VRK3           | NM_016440    | 65.24324752 | 3.458241896 | 3.07E-06    | 18.86601617 |
| LOC100507501   | NR_039999    | 218.4684708 | 6.681527334 | 3.33E-21    | 32.69738488 |
| RHOA           | NM_001664    | 80.53024548 | 2.171356836 | 6.70E-08    | 37.08752249 |
| POLR2D         | NM_004805    | 190.162165  | 5.542147557 | 5.61E-19    | 34.31199965 |
| NDFIP2         | NM_001161407 | 101.3256137 | 1.249566407 | 2.77E-10    | 81.08861851 |
| HERC1          | NM_003922    | 69.36679679 | 0.587182553 | 1.06E-07    | 118.1349759 |
| VGLL4          | NM_001284390 | 122.6512274 | 1.992219228 | 6.52E-12    | 61.56512581 |
| ZNF335         | NM_022095    | 95.34620525 | 6.397014944 | 1.37E-07    | 14.90479639 |
| PCYT1A         | NM_005017    | 166.2445312 | 0.229292405 | 1.06E-25    | 725.0328737 |
| MYBBP1A        | NM_014520    | 83.91763382 | 4.298952248 | 1.28E-07    | 19.52048522 |
| NSMF           | NM_001130971 | 66.77477667 | 8.339799343 | 0.000224547 | 8.006760586 |
| RP9P           | NR_003500    | 121.060491  | 3.569478068 | 1.45E-11    | 33.91546009 |
| EID2           | NM_153232    | 98.46847084 | 13.5977421  | 2.81E-05    | 7.241530992 |
| PARG           | NM_003631    | 72.75418513 | 0.488721015 | 6.21E-08    | 148.8664961 |
| PFDN5          | NM_002624    | 53.54955335 | 9.82442458  | 0.003342648 | 5.450655446 |
| PTGES          | NM_004878    | 118.9987163 | 3.786171059 | 2.78E-12    | 31.42983095 |
| TMEM214        | NM_001083590 | 157.9382254 | 2.532837936 | 2.10E-18    | 62.35623019 |
| VCPKMT         | NM_024558    | 66.24453119 | 1.569362759 | 3.45E-07    | 42.2111018  |
| LZTR1          | NM_006767    | 88.10039037 | 7.208741341 | 3.97E-07    | 12.22132772 |
| DLG1           | NM_004087    | 127.0398994 | 1.112909122 | 1.47E-13    | 114.1511889 |
| LRIG3          | NM_153377    | 87.57014489 | 1.256751067 | 2.40E-09    | 69.6797856  |
| ITGAX          | NM_001286375 | 34.28571429 | 0.238374945 | 6.42E-05    | 143.831032  |
| ESRRA          | NM_001282450 | 109.6319195 | 12.53013725 | 3.60E-07    | 8.749458794 |
| RBM18          | NR_027125    | 146.7747767 | 2.743446626 | 4.66E-15    | 53.5001393  |
| TMEM52         | NM_178545    | 107.3050222 | 24.83447562 | 0.000214189 | 4.320808855 |
| ZNF333         | NM_032433    | 81.06049096 | 1.11215912  | 7.23E-09    | 72.88569548 |
| PSAP           | NM_002778    | 200.5302455 | 1.776873432 | 1.75E-23    | 112.8556721 |
| ETFB           | NM_001985    | 63.1222656  | 4.86090437  | 2.73E-05    | 12.98570406 |
| DPH6           | NM_001141972 | 144.713002  | 1.489950057 | 1.63E-17    | 97.12607571 |
| TNFRSF12A      | NM_016639    | 243.3873883 | 51.75039709 | 6.57E-10    | 4.703101851 |
| SEPSECS-AS1    | NR_037934    | 95.87645073 | 1.118297039 | 7.90E-11    | 85.73433299 |
| ACER2          | NM_001010887 | 166.2445312 | 0.272634931 | 6.58E-24    | 609.769741  |
| TESK2          | NM_007170    | 104.4478793 | 1.161448929 | 1.06E-11    | 89.92894706 |
| ZNF204P        | NR_024553    | 41.06049096 | 1.546693529 | 0.00048588  | 26.54727016 |
| TBC1D2         | NM_001267571 | 75.61132799 | 1.632490862 | 2.20E-07    | 46.31653981 |
| TSTD1          | NM_001113205 | 133.0193079 | 21.37327694 | 1.03E-06    | 6.223627206 |
| SAMD13         | NM_001010971 | 44.4478793  | 3.28043054  | 0.000332213 | 13.54940419 |
| CHKB-CPT1B     | NR_027928    | 98.2033481  | 7.181168223 | 3.91E-08    | 13.67512152 |
| RPP38          | NM_006414    | 181.3256137 | 13.82644468 | 1.31E-13    | 13.11440634 |
| LIPE-AS1       | NR_073180    | 204.1827566 | 1.660911469 | 6.04E-20    | 122.9341602 |
| NDUFA4         | NM_002489    | 127.8352676 | 3.920788194 | 1.61E-13    | 32.60448188 |



|                |              |             |             |             |             |
|----------------|--------------|-------------|-------------|-------------|-------------|
| UGDH           | NM_001184701 | 175.8764507 | 1.755877884 | 4.64E-21    | 100.1643977 |
| TVP23C-CDRT4   | NM_001204478 | 112.2239396 | 1.767002643 | 6.43E-11    | 63.51090652 |
| LOC100996579   | NR_110164    | 75.34620525 | 2.827361387 | 1.02E-07    | 26.64894753 |
| NXPH4          | NM_007224    | 97.67310262 | 5.113967677 | 8.16E-09    | 19.0992804  |
| LOC101927151   | NR_110689    | 81.59073644 | 1.48078023  | 5.17E-10    | 55.09982831 |
| ASUN           | NM_018164    | 57.93822536 | 2.658238003 | 1.57E-05    | 21.79572533 |
| MRPS36         | NM_033281    | 115.3462052 | 3.981831905 | 8.72E-12    | 28.96812522 |
| ZNF764         | NM_033410    | 78.46847084 | 2.630116444 | 3.97E-08    | 29.83459954 |
| COMMD4         | NR_104313    | 72.75418513 | 3.133580653 | 3.31E-07    | 23.21758818 |
| LOC101926911   | NR_110104    | 72.48906239 | 0.719012299 | 6.81E-10    | 100.8175555 |
| ILF3-AS1       | NR_024333    | 111.6936942 | 5.504454347 | 6.53E-10    | 20.29151068 |
| CDC42EP1       | NM_152243    | 129.6319195 | 18.37998678 | 8.37E-08    | 7.052884264 |
| POLR1C         | NM_203290    | 112.7541851 | 12.9775996  | 1.16E-07    | 8.688369851 |
| TPP1           | NM_000391    | 67.30502215 | 4.975032229 | 7.57E-06    | 13.52856003 |
| DLEU1          | NR_109974    | 89.10167405 | 1.185659946 | 1.78E-09    | 75.14943418 |
| RAB18          | NM_001256412 | 95.87645073 | 0.981514146 | 5.25E-11    | 97.68218939 |
| ZNF225         | NM_013362    | 41.06049096 | 0.50687745  | 1.49E-05    | 81.00674229 |
| TUBGCP4        | NM_014444    | 130.162165  | 2.425395717 | 4.86E-14    | 53.66636219 |
| RECQL4         | NM_004260    | 102.1209819 | 25.03604332 | 9.92E-05    | 4.078958509 |
| EDC4           | NM_014329    | 167.0398994 | 2.829174115 | 1.52E-18    | 59.04192978 |
| FAM57A         | NM_024792    | 100         | 9.545123211 | 9.40E-08    | 10.47655413 |
| PSME3          | NM_005789    | 124.1827566 | 8.473953916 | 2.77E-10    | 14.65464148 |
| SNRNP40        | NM_004814    | 120.5302455 | 1.978548992 | 6.44E-13    | 60.9185044  |
| PMAIP1         | NM_021127    | 169.1016741 | 8.304054091 | 2.39E-15    | 20.3637491  |
| LOC100507642   | NR_108065    | 37.93822536 | 2.54380974  | 0.00266652  | 14.91393981 |
| SNAPC1         | NM_003082    | 141.3256137 | 0.825861022 | 1.78E-17    | 171.1251772 |
| HSPD1          | NM_002156    | 143.6525111 | 8.106243475 | 3.13E-12    | 17.72121841 |
| ZMYND15        | NM_001267822 | 57.67310262 | 2.513490711 | 8.76E-06    | 22.94542103 |
| ZNF816-ZNF321P | NM_001202473 | 72.22393965 | 0.951234969 | 9.14E-08    | 75.92649768 |
| OMA1           | NM_145243    | 55.08108251 | 0.342016158 | 5.30E-07    | 161.0481882 |
| C10orf32       | NM_001136200 | 102.1209819 | 1.275625374 | 1.44E-12    | 80.05562137 |
| PTGES2-AS1     | NR_024425    | 149.1016741 | 9.841033917 | 9.68E-12    | 15.15101719 |
| HMGCL          | NM_000191    | 129.3667968 | 2.45633266  | 2.74E-13    | 52.66664362 |
| PIM2           | NM_006875    | 55.34620525 | 4.128147599 | 4.36E-05    | 13.40703159 |
| RAB2A          | NM_001242644 | 123.1222656 | 1.080762658 | 1.09E-12    | 113.9216503 |
| RALBP1         | NM_006788    | 163.1222656 | 1.241004529 | 4.20E-18    | 131.4437311 |
| SYTL1          | NM_001193308 | 81.3256137  | 15.49147259 | 0.000175247 | 5.249701938 |
| AVL9           | NM_015060    | 123.9176338 | 0.085212086 | 2.62E-19    | 1454.226028 |
| VPS33B         | NM_001289149 | 101.060491  | 3.369985727 | 1.97E-09    | 29.98840326 |
| STK17A         | NM_004760    | 180.5302455 | 1.370728567 | 6.49E-21    | 131.7038616 |
| NABP1          | NM_001254736 | 192.2239396 | 6.42027393  | 6.15E-19    | 29.94014613 |
| LUC7L          | NM_018032    | 120.5302455 | 1.296070621 | 1.94E-13    | 92.99666511 |
| TRPC4AP        | NM_015638    | 121.3256137 | 0.677624653 | 1.70E-14    | 179.0454542 |
| GSS            | NM_000178    | 152.7541851 | 5.396819461 | 1.36E-13    | 28.30448308 |
| DZIP3          | NM_014648    | 132.4890624 | 1.049583008 | 1.01E-13    | 126.2301899 |
| PIAS3          | NM_006099    | 54.81595977 | 1.556862128 | 3.50E-06    | 35.20925764 |
| ALKBH2         | NM_001001655 | 69.89704227 | 11.69495692 | 0.000246592 | 5.976682323 |
| C8orf59        | NM_001293320 | 110.6924105 | 6.441079479 | 4.70E-10    | 17.18538187 |
| CYP39A1        | NM_001278739 | 56.40669621 | 0.187943659 | 1.58E-07    | 300.1255614 |
| TEF            | NM_003216    | 51.95881691 | 0.897267709 | 7.61E-06    | 57.90781989 |
| PIGU           | NM_080476    | 80.26512274 | 1.695901738 | 1.12E-07    | 47.32887581 |
| KIAA0020       | NM_014878    | 97.93822536 | 1.554205962 | 2.39E-10    | 63.01495923 |
| COPB1          | NM_001144062 | 110.4272878 | 1.676153615 | 6.45E-12    | 65.88136478 |
| MOCOS          | NM_017947    | 171.9588169 | 0.89755094  | 2.70E-19    | 191.5866936 |
| UBA1           | NM_003334    | 60          | 4.625162684 | 5.12E-05    | 12.97251667 |
| NCDN           | NM_014284    | 155.611328  | 7.693801502 | 1.69E-13    | 20.22554493 |
| MTA2           | NM_004739    | 121.060491  | 5.873850511 | 9.66E-11    | 20.61007354 |
| NDST2          | NM_003635    | 170.162165  | 5.225508642 | 4.10E-17    | 32.56375153 |
| HNRNPA1L2      | NM_001011724 | 124.1827566 | 1.43547246  | 1.95E-14    | 86.51002374 |
| OPA3           | NM_001017989 | 71.95881691 | 2.537456814 | 6.99E-07    | 28.35863709 |
| TMEM38A        | NM_024074    | 85.97940845 | 4.682608932 | 1.49E-07    | 18.36143263 |
| RBM43          | NM_198557    | 64.4478793  | 1.191448533 | 8.86E-08    | 54.09203799 |
| SLC35F3        | NM_173508    | 47.03989941 | 0.295883904 | 3.43E-05    | 158.9809339 |
| DIP2A          | NM_001146116 | 111.6936942 | 1.593626216 | 4.63E-11    | 70.08776153 |

|               |              |             |             |             |             |
|---------------|--------------|-------------|-------------|-------------|-------------|
| NDUFC2-KCTD14 | NM_001203261 | 69.36679679 | 3.360069066 | 1.79E-06    | 20.64445564 |
| FLJ38576      | NR_046264    | 115.8764507 | 18.18709618 | 1.19E-06    | 6.371355249 |
| GPR19         | NM_006143    | 41.59073644 | 0.218281483 | 3.72E-06    | 190.5371717 |
| DUS2          | NM_001271763 | 55.61132799 | 1.10643671  | 2.44E-05    | 50.26164398 |
| ALG10         | NM_032834    | 49.89704227 | 2.559379012 | 0.000114504 | 19.49576129 |
| NIPSNAP3A     | NM_015469    | 171.9588169 | 2.96352991  | 5.49E-19    | 58.02499794 |
| TMEM63B       | NM_018426    | 34.81595977 | 2.355410551 | 0.003466736 | 14.78127019 |
| ECI1          | NM_001178029 | 121.5907364 | 7.470724354 | 2.60E-10    | 16.2756288  |
| NCK1          | NM_006153    | 187.0398994 | 0.349161062 | 2.20E-25    | 535.6837288 |
| YTHDF2        | NM_016258    | 40.53024548 | 2.982345827 | 0.001052145 | 13.59005556 |
| TMED10        | NM_006827    | 67.83526763 | 0.74737333  | 1.50E-08    | 90.76490277 |
| PTDSS1        | NM_014754    | 284.9781248 | 2.863775558 | 2.55E-30    | 99.51133356 |
| TM4SF19       | NM_138461    | 42.12098192 | 3.637418472 | 0.001860964 | 11.57991093 |
| SRF           | NM_003131    | 123.6525111 | 8.378807599 | 2.44E-10    | 14.75776948 |
| DGCR2         | NR_033674    | 118.2033481 | 2.99030017  | 1.92E-11    | 39.52892398 |
| ERRFI1        | NM_018948    | 153.5495533 | 10.02345268 | 2.65E-12    | 15.31902811 |
| DNAJC27       | NM_016544    | 113.0193079 | 1.966927434 | 1.27E-12    | 57.45982588 |
| GOLPH3        | NM_022130    | 138.7335936 | 1.954843856 | 6.54E-15    | 70.96914322 |
| RBM34         | NM_015014    | 164.713002  | 0.143127142 | 9.02E-27    | 1150.815976 |
| SIRT7         | NM_016538    | 138.7335936 | 12.24364517 | 2.43E-10    | 11.33106944 |
| GTF2H5        | NM_207118    | 232.7541851 | 0.711078768 | 2.79E-32    | 327.3254606 |
| KANK1         | NM_001256877 | 34.81595977 | 0.336686435 | 0.000535461 | 103.4076699 |
| DNAJC16       | NM_015291    | 96.67181894 | 1.832069224 | 4.54E-10    | 52.76646629 |
| ZBTB34        | NM_001099270 | 25.71428571 | 0.948602249 | 0.003147074 | 27.10755297 |
| CCRN4L        | NM_012118    | 133.0193079 | 4.509903431 | 9.58E-13    | 29.49493485 |
| PGD           | NM_002631    | 107.3050222 | 1.600295698 | 1.03E-12    | 67.05324665 |
| ALDH18A1      | NM_001017423 | 69.89704227 | 1.107243869 | 5.05E-07    | 63.1270529  |
| SUSD3         | NM_001287007 | 83.38738834 | 2.070406498 | 9.36E-09    | 40.27585327 |
| DGUOK         | NM_080918    | 130.4272878 | 3.250121969 | 9.61E-13    | 40.12996712 |
| PABPC1        | NM_002568    | 153.2844306 | 10.83496984 | 6.33E-12    | 14.14719495 |
| PRKDC         | NM_006904    | 169.3667968 | 1.872757041 | 1.38E-16    | 90.43714323 |
| ZCCHC24       | NM_153367    | 83.65251108 | 0.23314967  | 1.26E-11    | 358.7931782 |
| TTYH2         | NM_032646    | 128.8365513 | 2.795356795 | 3.62E-13    | 46.08948366 |
| TRAPPC4       | NM_016146    | 64.4478793  | 8.619563059 | 9.77E-05    | 7.476931123 |
| USP3-AS1      | NR_034080    | 200.2651227 | 9.19295864  | 1.37E-17    | 21.78462132 |
| PCOLCE-AS1    | NR_038910    | 43.65251108 | 1.760393933 | 0.000204934 | 24.7970129  |
| MANEA         | NM_024641    | 92.22393965 | 0.797962103 | 8.16E-11    | 115.5743353 |
| ARPC2         | NM_005731    | 38.2033481  | 3.569586149 | 0.002198961 | 10.70245863 |
| DENND1A       | NM_020946    | 103.1222656 | 0.389925412 | 2.92E-11    | 264.4666453 |
| IPP           | NM_001145349 | 161.8558592 | 0.325780048 | 1.12E-23    | 496.8255738 |
| DDX17         | NM_006386    | 116.6718189 | 5.949328195 | 5.10E-10    | 19.61092331 |
| LIG3          | NM_002311    | 69.89704227 | 3.232880924 | 7.14E-07    | 21.62066711 |
| KRTCAP3       | NM_173853    | 117.9382254 | 13.1285205  | 1.56E-07    | 8.983359959 |
| USP8          | NM_005154    | 152.7541851 | 0.242836834 | 1.08E-21    | 629.040424  |
| SFXN5         | NM_144579    | 103.1222656 | 1.965246021 | 5.80E-10    | 52.47295479 |
| NCBP2-AS2     | NR_024388    | 98.2033481  | 8.039510294 | 7.56E-07    | 12.21509078 |
| RPUSD1        | NM_058192    | 95.08108251 | 10.82008618 | 2.46E-06    | 8.787460736 |
| ANAPC2        | NM_013366    | 92.48906239 | 0.289108874 | 7.90E-14    | 319.9108391 |
| ZNF436        | NM_030634    | 118.4684708 | 3.906374241 | 8.06E-12    | 30.32696397 |
| GYG1          | NM_001184721 | 120.7953682 | 2.577919598 | 1.33E-12    | 46.85769421 |
| AMIGO3        | NM_198722    | 74.81595977 | 16.29581896 | 0.001038015 | 4.591113828 |
| FSD1L         | NM_001287191 | 92.48906239 | 0.307669226 | 1.05E-11    | 300.6120038 |
| MED8          | NM_201542    | 88.10039037 | 3.300411693 | 4.85E-09    | 26.6937578  |
| TCF25         | NM_014972    | 200.7953682 | 3.092300157 | 1.68E-20    | 64.93398378 |
| MNAT1         | NM_001177963 | 155.611328  | 0.416128009 | 5.48E-18    | 373.9506226 |
| C4orf27       | NM_017867    | 110.162165  | 1.099667371 | 3.21E-13    | 100.1777155 |
| TNRC18        | NM_001080495 | 37.93822536 | 2.443978233 | 0.002485836 | 15.52314372 |
| PPP4R2        | NM_174907    | 49.36679679 | 1.041963843 | 1.20E-05    | 47.3786083  |
| MTMR3         | NM_021090    | 133.0193079 | 0.730292726 | 2.08E-15    | 182.1451908 |
| EBLN3         | NR_036592    | 75.34620525 | 2.372094609 | 1.41E-07    | 31.76357509 |
| DPH2          | NM_001384    | 57.40797988 | 3.676786107 | 2.42E-05    | 15.61363055 |
| ZFP36L2       | NM_006887    | 140.7953682 | 11.89909376 | 1.74E-10    | 11.83244465 |
| NUDT8         | NM_001243750 | 102.1209819 | 6.994453315 | 3.01E-08    | 14.60028073 |
| USO1          | NM_001290049 | 87.57014489 | 1.737079607 | 1.06E-08    | 50.41228078 |

|              |              |             |             |             |             |
|--------------|--------------|-------------|-------------|-------------|-------------|
| PHF5A        | NM_032758    | 73.01930787 | 1.584434585 | 3.16E-08    | 46.08540394 |
| KIAA0907     | NM_014949    | 135.611328  | 2.732189992 | 5.72E-14    | 49.63466244 |
| TRIM35       | NM_171982    | 116.1415735 | 3.52016948  | 2.96E-11    | 32.99317664 |
| GPC2         | NM_152742    | 88.83655131 | 4.283537317 | 2.95E-08    | 20.73906324 |
| SDC4         | NM_002999    | 140         | 6.073735357 | 2.04E-12    | 23.05006586 |
| ADCK2        | NM_052853    | 115.3462052 | 1.383574508 | 1.13E-13    | 83.36826431 |
| STAM2        | NM_005843    | 74.55083703 | 0.455064333 | 1.45E-09    | 163.8248299 |
| NUTM2A-AS1   | NR_024397    | 109.3667968 | 1.678570869 | 9.21E-11    | 65.15470916 |
| LOC101927051 | NR_109952    | 54.81595977 | 5.545991197 | 0.000182852 | 9.883888707 |
| C4orf29      | NM_001039717 | 124.1827566 | 0.653070393 | 1.72E-15    | 190.1521764 |
| PPM1F        | NM_014634    | 100.5302455 | 3.08781168  | 3.32E-10    | 32.55711678 |
| NDC80        | NM_006101    | 77.93822536 | 0.472721176 | 2.78E-10    | 164.8714492 |
| SREBF1       | NM_004176    | 167.0398994 | 14.18402303 | 7.00E-12    | 11.77662354 |
| ICE2         | NM_001018089 | 157.9382254 | 0.685450165 | 6.79E-19    | 230.4153291 |
| ACO1         | NM_002197    | 135.3462052 | 1.092940863 | 1.11E-14    | 123.8367142 |
| CLP1         | NM_006831    | 64.18275656 | 3.186517444 | 4.99E-06    | 20.14197558 |
| RNF144A      | NM_014746    | 91.69369417 | 0.021048883 | 1.41E-15    | 4356.226163 |
| GPN2         | NM_018066    | 92.48906239 | 3.825630502 | 3.85E-09    | 24.1761619  |
| NUMA1        | NR_104476    | 112.4890624 | 3.343997967 | 7.59E-11    | 33.63909413 |
| TBXA2R       | NM_201636    | 66.77477667 | 0.850415568 | 2.49E-08    | 78.52017201 |
| TXNDC16      | NM_020784    | 113.2844306 | 0.746844534 | 3.03E-13    | 151.684086  |
| TIAM1        | NM_003253    | 77.14285714 | 1.318816741 | 2.77E-08    | 58.49399294 |
| METAP1D      | NM_199227    | 115.3462052 | 0.521045013 | 2.24E-14    | 221.374742  |
| PSMD9        | NR_048555    | 112.7541851 | 0.915056623 | 1.49E-13    | 123.2209923 |
| ZDHHC12      | NM_032799    | 156.1415735 | 10.53588481 | 9.27E-13    | 14.81997728 |
| CNTROB       | NM_001037144 | 87.30502215 | 3.587590755 | 2.37E-08    | 24.33527905 |
| TMEM183B     | NM_001079809 | 97.93822536 | 2.718068428 | 8.47E-10    | 36.03228835 |
| KDM4A        | NM_014663    | 38.2033481  | 3.720232906 | 0.002385317 | 10.26907429 |
| CSNK1E       | NM_001289912 | 97.67310262 | 4.327836635 | 2.88E-08    | 22.56857429 |
| MAN2B1       | NM_001173498 | 78.2033481  | 0.768309909 | 1.62E-09    | 101.7862027 |
| METTL2A      | NM_181725    | 128.1003904 | 5.884581215 | 4.07E-11    | 21.76882019 |
| POMK         | NM_032237    | 130.162165  | 1.152335653 | 8.58E-16    | 112.9550792 |
| PRPF4B       | NM_003913    | 78.99871632 | 1.794965844 | 3.99E-08    | 44.01126439 |
| IL18         | NM_001562    | 126.5096539 | 2.1891742   | 1.95E-14    | 57.78875612 |
| COPS3        | NM_001199125 | 49.10167405 | 2.547673156 | 0.000128161 | 19.27314496 |
| FANCF        | NM_022725    | 41.06049096 | 0.623863606 | 8.32E-05    | 65.81645497 |
| LHFPL2       | NM_005779    | 111.6936942 | 0.947335351 | 2.10E-12    | 117.903015  |
| UQC2         | NM_032340    | 133.0193079 | 9.771127927 | 5.74E-11    | 13.61350592 |
| TTLL7        | NM_024686    | 93.81467609 | 0.453770822 | 2.71E-11    | 206.74462   |
| HECTD1       | NM_015382    | 51.48777871 | 0.376921951 | 3.13E-06    | 136.6006374 |
| RANGAP1      | NM_002883    | 98.99871632 | 4.477725122 | 7.37E-09    | 22.10915445 |
| CEP19        | NM_032898    | 171.9588169 | 4.980721459 | 6.93E-18    | 34.52488125 |
| MRPS21       | NM_031901    | 147.5701449 | 4.965935933 | 2.64E-14    | 29.71648182 |
| DGKA         | NM_201444    | 66.24453119 | 2.944882948 | 1.30E-06    | 22.49479262 |
| REST         | NM_005612    | 114.550837  | 2.023349303 | 1.35E-12    | 56.61446437 |
| SEC23A       | NM_006364    | 95.08108251 | 0.656413169 | 1.45E-11    | 144.849444  |
| IMPDH1       | NM_001142575 | 83.38738834 | 3.139937423 | 4.61E-08    | 26.55702236 |
| LIPA         | NM_000235    | 55.61132799 | 0.599430176 | 5.75E-07    | 92.77365444 |
| CCDC110      | NM_001145411 | 63.1222656  | 1.301550514 | 1.10E-06    | 48.49774553 |
| C9orf91      | NM_153045    | 45.97940845 | 0.448180623 | 4.73E-06    | 102.5912458 |
| PRDX3        | NM_006793    | 213.8146761 | 5.34842819  | 3.17E-22    | 39.97710514 |
| TPT1         | NM_001286273 | 136.1415735 | 28.75580489 | 1.64E-06    | 4.734403158 |
| RPP25        | NM_017793    | 187.8352676 | 45.30618487 | 2.18E-07    | 4.145907853 |
| XRCC3        | NM_001100118 | 115.0810825 | 10.25542246 | 9.14E-09    | 11.22148629 |
| C19orf40     | NM_152266    | 87.03989941 | 3.930811076 | 1.67E-08    | 22.14298722 |
| MTHFD1L      | NM_001242767 | 86.24453119 | 2.041922498 | 4.79E-08    | 42.23692686 |
| RPS5         | NM_001009    | 132.4890624 | 11.17005267 | 6.52E-10    | 11.86109558 |
| GDPD1        | NM_001165994 | 106.2445312 | 0.567155899 | 8.47E-14    | 187.3286189 |
| VPS8         | NM_015303    | 111.7529015 | 0.300478198 | 3.47E-13    | 371.9168385 |
| AURKA        | NM_198437    | 47.03989941 | 1.565240452 | 0.000133046 | 30.05282629 |
| OSR1         | NM_145260    | 37.93822536 | 0.637469427 | 0.000100196 | 59.5137959  |
| PFKL         | NM_002626    | 45.71428571 | 3.485459651 | 0.000267429 | 13.11571221 |
| CCNL1        | NM_020307    | 172.2239396 | 13.92448487 | 4.24E-13    | 12.36842449 |
| ULBP1        | NM_025218    | 57.67310262 | 3.071094198 | 2.82E-05    | 18.77933365 |

|              |              |             |             |             |             |
|--------------|--------------|-------------|-------------|-------------|-------------|
| NGLY1        | NM_018297    | 103.6525111 | 0.594054308 | 5.26E-13    | 174.4832244 |
| MAP3K1       | NM_005921    | 97.40797988 | 1.291395434 | 7.21E-10    | 75.42846856 |
| HAGH         | NM_001286249 | 87.30502215 | 2.066488689 | 6.96E-10    | 42.24800389 |
| SNX24        | NM_014035    | 102.8571429 | 0.693483921 | 1.10E-11    | 148.3194342 |
| RNF213       | NM_001256071 | 109.3667968 | 0.904497893 | 2.91E-12    | 120.9143743 |
| RPUSD3       | NM_001142547 | 146.7747767 | 12.6491482  | 6.04E-11    | 11.60353048 |
| PGM3         | NM_015599    | 152.2239396 | 2.50124392  | 9.80E-16    | 60.85929421 |
| ANKRD54      | NM_138797    | 106.2445312 | 2.775372576 | 4.20E-11    | 38.28117785 |
| FAM98A       | NM_015475    | 91.95881691 | 3.589797308 | 8.12E-09    | 25.61671566 |
| GNB2         | NM_005273    | 84.4478793  | 13.0329414  | 2.13E-05    | 6.479571782 |
| STX5         | NM_001244666 | 101.5907364 | 4.430066716 | 1.72E-09    | 22.93210079 |
| NECAB3       | NM_031231    | 115.611328  | 10.41690984 | 9.02E-09    | 11.0984284  |
| C5orf55      | NM_138464    | 124.9781248 | 13.1709688  | 6.31E-08    | 9.488909028 |
| SNRPA1       | NM_003090    | 90.42728775 | 2.002152759 | 1.07E-10    | 45.16502916 |
| PRSS8        | NM_002773    | 95.34620525 | 15.20867005 | 8.72E-06    | 6.26920072  |
| CASP8AP2     | NM_001137668 | 129.3667968 | 3.301967532 | 4.34E-13    | 39.17870044 |
| AKAP8L       | NM_001291478 | 55.87645073 | 4.882613914 | 0.000137397 | 11.44396254 |
| HADH         | NM_005327    | 92.48906239 | 2.01329935  | 2.55E-09    | 45.93905144 |
| LOC101927814 | NR_110930    | 63.1222656  | 2.24049668  | 3.13E-06    | 28.17333592 |
| PODXL        | NM_001018111 | 105.9794085 | 2.93611452  | 1.73E-10    | 36.09512085 |
| MUS81        | NM_025128    | 61.06049096 | 11.72238266 | 0.001693857 | 5.208880545 |
| CCDC102A     | NM_033212    | 85.97940845 | 3.298742604 | 7.54E-08    | 26.06429746 |
| SLC1A1       | NM_004170    | 100.7953682 | 0.245095055 | 2.19E-13    | 411.2501098 |
| GSTA4        | NM_001512    | 72.22393965 | 1.352247105 | 3.62E-08    | 53.41031189 |
| CHAC1        | NM_024111    | 46.24453119 | 7.280745618 | 0.004745339 | 6.351620235 |
| DHRS13       | NM_144683    | 55.61132799 | 11.79277684 | 0.004818881 | 4.715711045 |
| CLASP2       | NM_015097    | 183.6525111 | 0.10003023  | 3.46E-26    | 1835.970093 |
| GTPBP8       | NM_138485    | 143.3873883 | 6.059741504 | 4.09E-13    | 23.66229455 |
| SS18         | NM_001007559 | 178.4684708 | 1.06544841  | 7.89E-20    | 167.5055021 |
| REV3L        | NM_001286432 | 96.14157347 | 1.257600178 | 2.10E-09    | 76.44844134 |
| ZNF33B       | NM_006955    | 175.0810825 | 1.564188438 | 1.57E-19    | 111.9309402 |
| CASC4        | NM_138423    | 140.7953682 | 0.381557164 | 1.39E-17    | 369.0020303 |
| PCGF6        | NM_001011663 | 118.9987163 | 0.874460555 | 8.22E-14    | 136.0824289 |
| YLPM1        | NM_019589    | 174.8159598 | 0.538494472 | 7.83E-23    | 324.6383555 |
| NOXA1        | NM_001256067 | 80.26512274 | 13.39130394 | 5.02E-05    | 5.993824283 |
| HEIH         | NR_045680    | 101.3256137 | 22.22860995 | 0.000186301 | 4.558342331 |
| FAM171A2     | NM_198475    | 114.550837  | 5.462938595 | 1.03E-10    | 20.96872133 |
| MED24        | NM_001267797 | 44.18275656 | 2.198937411 | 0.000483098 | 20.09277587 |
| COQ3         | NM_017421    | 121.060491  | 1.883140453 | 1.20E-13    | 64.28649057 |
| G6PD         | NM_001042351 | 61.06049096 | 6.896687543 | 0.000237496 | 8.853596829 |
| NUDT21       | NM_007006    | 63.91763382 | 0.357188331 | 2.39E-09    | 178.9465898 |
| CUL4A        | NM_003589    | 154.550837  | 1.266195465 | 3.33E-17    | 122.0592249 |
| MTPAP        | NM_018109    | 49.89704227 | 1.409454584 | 9.47E-05    | 35.40166731 |
| ATP6AP2      | NM_005765    | 24.18275656 | 0.449457323 | 0.004601697 | 53.80434435 |
| IL15RA       | NM_172200    | 55.87645073 | 0.191922206 | 6.14E-09    | 291.1411438 |
| SLC52A3      | NM_033409    | 74.81595977 | 3.857931221 | 2.79E-07    | 19.39276661 |
| LOC150776    | NR_026922    | 64.4478793  | 2.724956113 | 1.64E-06    | 23.65097882 |
| CALB2        | NM_001740    | 49.63191953 | 1.503892459 | 8.27E-05    | 33.00230628 |
| MRV11-AS1    | NR_034094    | 124.713002  | 1.921397147 | 4.76E-13    | 64.90745664 |
| TMEM179B     | NM_199337    | 167.5701449 | 23.87420939 | 9.09E-10    | 7.018877239 |
| ANKRD18A     | NM_147195    | 66.77477667 | 0.578865501 | 2.39E-08    | 115.3545627 |
| HSPA5        | NM_005347    | 177.9382254 | 7.265690617 | 1.86E-16    | 24.49020124 |
| SMAP1        | NM_021940    | 146.5096539 | 0.563325753 | 9.34E-17    | 260.0798086 |
| FLII         | NM_002018    | 87.83526763 | 4.588858469 | 2.37E-08    | 19.14098424 |
| CASP9        | NR_102733    | 40          | 1.865882636 | 0.000862041 | 21.43757556 |
| UBQLN1       | NM_053067    | 52.48906239 | 2.378593997 | 7.49E-05    | 22.0672643  |
| MRPL27       | NM_016504    | 150.6924105 | 3.991599122 | 5.09E-16    | 37.75239093 |
| LAMTOR5      | NM_006402    | 56.93694168 | 7.687152131 | 0.000833253 | 7.406766604 |
| TBC1D20      | NR_111901    | 109.3667968 | 3.03946604  | 2.06E-10    | 35.98224009 |
| SUPT16H      | NM_007192    | 61.85585918 | 4.245137577 | 3.33E-05    | 14.57099047 |
| B3GNT3       | NM_014256    | 169.3667968 | 3.011865705 | 1.82E-18    | 56.23318347 |
| MREG         | NM_018000    | 38.2033481  | 1.878249951 | 0.00220614  | 20.33986375 |
| FZD2         | NM_001466    | 28.83655131 | 1.418447196 | 0.002582849 | 20.32966147 |
| TMEM39A      | NM_018266    | 67.83526763 | 1.682667419 | 5.32E-07    | 40.31412677 |

|              |              |             |             |             |             |
|--------------|--------------|-------------|-------------|-------------|-------------|
| SUFU         | NM_016169    | 98.2033481  | 2.442982533 | 2.71E-09    | 40.19813763 |
| SERPINE2     | NM_006216    | 106.2445312 | 1.118048003 | 3.24E-11    | 95.02680644 |
| ENOX2        | NM_182314    | 69.10167405 | 0.194263786 | 3.61E-08    | 355.7105291 |
| SMARCD1      | NM_003076    | 57.93822536 | 1.582664154 | 3.13E-06    | 36.60803539 |
| CLCN6        | NM_001286    | 41.3256137  | 0.293013261 | 1.73E-05    | 141.0366669 |
| ZC3HAV1L     | NM_080660    | 152.2239396 | 8.484721353 | 9.70E-13    | 17.94094742 |
| MAFF         | NM_012323    | 84.18275656 | 5.323002804 | 8.48E-07    | 15.81489991 |
| HMGCS1       | NM_001098272 | 109.3667968 | 1.525534541 | 1.99E-12    | 71.69080336 |
| LOC101927755 | NR_110815    | 50.69241049 | 0.240121149 | 1.66E-07    | 211.1118104 |
| TMEM30A      | NM_001143958 | 100.2651227 | 1.362666024 | 3.65E-11    | 73.58011497 |
| AK4          | NM_203464    | 82.12098192 | 0.869407197 | 1.10E-09    | 94.45629413 |
| GOLGA1       | NM_002077    | 109.8970423 | 1.273913655 | 1.96E-11    | 86.26726138 |
| MDFIC        | NM_001166345 | 49.63191953 | 0.22654607  | 3.18E-06    | 219.0809111 |
| SLC35G2      | NM_025246    | 71.42857143 | 1.629372793 | 2.59E-07    | 43.83807791 |
| MPHOSPH9     | NM_022782    | 164.1827566 | 0.469625637 | 1.70E-21    | 349.6034788 |
| SPINT1       | NM_181642    | 129.3667968 | 5.13114999  | 4.50E-12    | 25.21204741 |
| PRPS1        | NM_002764    | 66.50965393 | 1.88190708  | 7.03E-07    | 35.34162479 |
| LLPH-AS1     | NR_125724    | 170.6924105 | 11.34398322 | 5.75E-14    | 15.04695548 |
| ACAT2        | NM_005891    | 89.36679679 | 3.983155202 | 2.68E-08    | 22.43618244 |
| LAMC1        | NM_002293    | 86.24453119 | 1.173764023 | 1.40E-09    | 73.47689099 |
| EIF3A        | NM_003750    | 156.1415735 | 5.63419296  | 1.51E-14    | 27.71321014 |
| TRMT2B       | NM_001167972 | 35.08108251 | 1.705032869 | 0.003589065 | 20.57501832 |
| PNMA1        | NM_006029    | 108.1003904 | 15.35840081 | 2.55E-06    | 7.038518641 |
| BCDIN3D      | NM_181708    | 146.5096539 | 8.585112489 | 9.30E-13    | 17.06554854 |
| SLC25A6      | NM_001636    | 70.16216501 | 13.18014646 | 0.000500077 | 5.323322108 |
| LINC00941    | NR_040245    | 135.3462052 | 11.60837077 | 2.87E-10    | 11.65936271 |
| MAP2K4       | NM_003010    | 127.8352676 | 1.28075304  | 5.10E-13    | 99.81258183 |
| JUN          | NM_002228    | 110.4272878 | 12.148153   | 1.38E-07    | 9.090047497 |
| FAM227A      | NM_001291030 | 41.59073644 | 1.100656454 | 6.03E-05    | 37.78720989 |
| VPS53        | NM_018289    | 92.75418513 | 0.130488583 | 3.81E-12    | 710.8222249 |
| E4F1         | NM_001288776 | 84.4478793  | 5.35483828  | 3.13E-07    | 15.77038836 |
| TTYH3        | NM_025250    | 46.24453119 | 3.034315509 | 0.00027386  | 15.24051506 |
| LINC01273    | NR_109943    | 123.1222656 | 5.785345234 | 8.21E-12    | 21.28174908 |
| MCM3         | NM_001270472 | 33.81467609 | 3.643729441 | 0.003635942 | 9.280237909 |
| CD2AP        | NM_012120    | 117.6731026 | 0.710257045 | 2.06E-13    | 165.6767835 |
| EPPK1        | NM_031308    | 34.81595977 | 3.137159652 | 0.002815774 | 11.09792412 |
| WDR59        | NM_030581    | 92.48906239 | 1.689043406 | 6.82E-09    | 54.75825076 |
| WHAMM        | NM_001080435 | 115.3462052 | 0.08693757  | 8.78E-19    | 1326.770525 |
| UQCC1        | NM_199487    | 81.06049096 | 1.713829179 | 1.08E-07    | 47.2978824  |
| RFXAP        | NM_000538    | 78.46847084 | 1.561616276 | 1.99E-09    | 50.2482409  |
| RBFA         | NM_024805    | 117.9382254 | 1.93497493  | 6.34E-13    | 60.95077695 |
| LZTS3        | NM_001282533 | 83.38738834 | 2.190436407 | 9.13E-09    | 38.06884696 |
| GTF3C1       | NM_001286242 | 108.8365513 | 1.346207141 | 4.86E-11    | 80.84680877 |
| CUL7         | NM_014780    | 155.0810825 | 4.761770527 | 6.16E-15    | 32.56794539 |
| CRK          | NM_005206    | 182.8571429 | 3.131266531 | 1.21E-18    | 58.39718243 |
| FLJ21408     | NR_037184    | 38.99871632 | 2.379925791 | 0.000790941 | 16.3865262  |
| ZNF678       | NR_102302    | 80.53024548 | 0.276827488 | 3.48E-10    | 290.9040792 |
| LYRM2        | NR_028495    | 97.40797988 | 1.881441621 | 5.26E-12    | 51.77305467 |
| TDG          | NM_003211    | 155.3462052 | 4.620547256 | 2.43E-15    | 33.62073725 |
| SLC16A1-AS1  | NR_103744    | 109.8970423 | 1.224114922 | 3.57E-14    | 89.77673608 |
| PDK3         | NM_005391    | 140.5302455 | 0.108386787 | 1.49E-22    | 1296.562514 |
| TBX3         | NM_016569    | 151.6936942 | 1.716545635 | 1.71E-18    | 88.37148927 |
| ERO1L        | NM_014584    | 151.9588169 | 1.046540814 | 2.33E-17    | 145.2010423 |
| CDC42BPG     | NM_017525    | 69.36679679 | 4.578942348 | 6.44E-06    | 15.14908717 |
| PLA2G10      | NM_003561    | 34.55083703 | 3.016188448 | 0.003485432 | 11.45513207 |
| ERLIN2       | NM_001003790 | 92.22393965 | 2.661959929 | 8.26E-10    | 34.64512693 |
| ATG14        | NM_014924    | 87.83526763 | 1.316637144 | 2.32E-09    | 66.71182566 |
| RBM45        | NM_152945    | 166.5096539 | 1.850259949 | 1.08E-19    | 89.99257323 |
| FAM53C       | NM_016605    | 126.7747767 | 9.055737348 | 2.10E-10    | 13.99938755 |
| CUTC         | NM_015960    | 161.8558592 | 4.326049443 | 2.13E-16    | 37.41424164 |
| COLGALT1     | NM_024656    | 52.48906239 | 1.378293724 | 3.02E-05    | 38.08263905 |
| TMEM65       | NM_194291    | 143.1222656 | 0.381252072 | 7.77E-20    | 375.4006239 |
| DPCD         | NM_015448    | 54.87516705 | 1.330247848 | 9.29E-06    | 41.25183675 |
| FAM46B       | NM_052943    | 81.85585918 | 2.073799504 | 2.88E-09    | 39.47144312 |

|              |              |             |             |             |             |
|--------------|--------------|-------------|-------------|-------------|-------------|
| CFAP99       | NM_001193282 | 18.73359358 | 0.015684115 | 0.002143505 | 1194.431014 |
| FBXO31       | NM_001282683 | 155.611328  | 3.678088837 | 2.55E-14    | 42.30765892 |
| CNP          | NM_033133    | 173.0193079 | 13.63498372 | 6.13E-13    | 12.68936666 |
| DHODH        | NM_001361    | 104.4478793 | 3.305157854 | 1.47E-10    | 31.60147984 |
| TMEM194B     | NM_001142645 | 137.4079799 | 1.897750551 | 1.20E-15    | 72.40571201 |
| PSME2        | NM_002818    | 157.4079799 | 8.836144422 | 3.40E-13    | 17.81410221 |
| MEAF6        | NR_073091    | 92.48906239 | 0.87030917  | 4.34E-11    | 106.2715017 |
| RAB3A        | NM_002866    | 111.9588169 | 7.254951842 | 1.15E-09    | 15.43205515 |
| METTL6       | NM_152396    | 69.36679679 | 1.252184147 | 7.92E-08    | 55.39664191 |
| USP11        | NM_004651    | 77.93822536 | 1.281816241 | 3.41E-09    | 60.80296289 |
| POM121       | NM_001257190 | 99.26383906 | 4.813250083 | 1.28E-08    | 20.62303794 |
| CHTF18       | NM_022092    | 69.36679679 | 4.992560405 | 1.38E-05    | 13.89403255 |
| FAM24B       | NM_001204364 | 59.5289618  | 1.381867941 | 3.41E-06    | 43.07861846 |
| PEG10        | NM_001040152 | 24.18275656 | 0.350324992 | 0.002507659 | 69.02949289 |
| B9D1         | NM_015681    | 78.46847084 | 5.939082604 | 5.34E-06    | 13.21222082 |
| FLJ22447     | NR_039985    | 26.77477667 | 0.627215624 | 0.004266239 | 42.68831268 |
| CCDC38       | NM_182496    | 69.10167405 | 0.46776377  | 1.60E-08    | 147.7277175 |
| CDC42SE1     | NM_020239    | 132.4890624 | 7.197424021 | 8.82E-12    | 18.40784453 |
| MRPL15       | NM_014175    | 113.2844306 | 4.909159223 | 1.76E-10    | 23.07613696 |
| C8orf76      | NM_032847    | 167.5701449 | 3.828512792 | 1.54E-17    | 43.76899177 |
| CHURC1       | NM_145165    | 50.16216501 | 2.911384348 | 4.91E-05    | 17.22966088 |
| FAM175B      | NM_032182    | 86.83398396 | 1.032737328 | 1.52E-09    | 84.08138413 |
| HARS2        | NM_001278731 | 115.0810825 | 6.071352737 | 3.76E-10    | 18.95476799 |
| VAMP4        | NR_033704    | 102.6512274 | 1.434590633 | 4.36E-11    | 71.5543689  |
| LINC00886    | NR_038387    | 58.73359358 | 1.156979218 | 7.17E-06    | 50.7646055  |
| GPD2         | NM_000408    | 106.2445312 | 1.201750294 | 1.96E-10    | 88.40815907 |
| SETDB1       | NM_012432    | 35.08108251 | 3.064341538 | 0.004075762 | 11.44816336 |
| IRF6         | NM_006147    | 138.2033481 | 2.653282389 | 1.84E-14    | 52.08768907 |
| CAP2         | NM_006366    | 54.55083703 | 0.486999248 | 2.89E-06    | 112.0142119 |
| RNPS1        | NM_001286627 | 121.8558592 | 8.752966816 | 7.23E-10    | 13.92166356 |
| APIG1        | NM_001030007 | 80.53024548 | 1.773467814 | 8.41E-08    | 45.40834903 |
| GPR162       | NM_019858    | 62.85714286 | 14.56292943 | 0.002723747 | 4.316243044 |
| NEO1         | NM_002499    | 52.22393965 | 0.369092497 | 6.82E-06    | 141.4928237 |
| C1orf204     | NM_001134233 | 46.50965393 | 5.609514811 | 0.00139434  | 8.291207974 |
| INCA1        | NM_001167987 | 112.4890624 | 4.585371457 | 9.77E-11    | 24.53215916 |
| PMF1         | NM_001199654 | 81.59073644 | 1.651446559 | 5.92E-09    | 49.40561716 |
| URGCP-MRPS24 | NM_001204871 | 37.14285714 | 3.37537936  | 0.0022094   | 11.00405412 |
| LOC100507419 | NR_123723    | 89.10167405 | 1.570644213 | 1.07E-10    | 56.72938104 |
| VPS9D1       | NM_004913    | 213.8146761 | 29.24009686 | 1.36E-12    | 7.312379201 |
| SMAD2        | NM_005901    | 100.7953682 | 0.971154969 | 1.64E-11    | 103.7891701 |
| CSNK1D       | NR_110578    | 137.4079799 | 10.99807136 | 1.23E-10    | 12.49382509 |
| LOC101927795 | NR_110275    | 101.8558592 | 4.294348748 | 2.44E-09    | 23.71858113 |
| SNRPG        | NM_003096    | 113.2844306 | 4.427881452 | 9.71E-11    | 25.58434137 |
| PPP3CA       | NM_001130692 | 78.2033481  | 1.806823314 | 3.58E-07    | 43.28223325 |
| CPE          | NM_001873    | 80.53024548 | 0.767104453 | 3.47E-09    | 104.9795047 |
| LAMTOR1      | NM_017907    | 126.7747767 | 9.921571549 | 9.09E-10    | 12.77769112 |
| LSM8         | NM_016200    | 66.77477667 | 4.678404766 | 1.27E-05    | 14.27297979 |
| UBE2D1       | NM_003338    | 144.4478793 | 0.947478623 | 8.53E-18    | 152.4550272 |
| ZNF561-AS1   | NR_122038    | 152.2239396 | 0.594403901 | 2.10E-21    | 256.0951222 |
| FAM149B1     | NM_173348    | 117.9382254 | 1.480341125 | 4.28E-12    | 79.66962706 |
| CSTF1        | NM_001033522 | 86.24453119 | 1.349446429 | 1.09E-10    | 63.91104479 |
| MYPOP        | NM_001012643 | 140.2651227 | 2.389175437 | 3.11E-16    | 58.70859065 |
| ZNF561       | NM_152289    | 118.9987163 | 2.758026444 | 6.40E-13    | 43.14632899 |
| MED23        | NM_004830    | 98.2033481  | 2.004085546 | 4.66E-10    | 49.00157495 |
| ANKLE1       | NM_001278444 | 83.1222656  | 7.278636577 | 1.31E-06    | 11.42003241 |
| PIM3         | NM_001001852 | 83.38738834 | 14.66651439 | 7.27E-05    | 5.685562782 |
| PTPN11       | NM_080601    | 169.1016741 | 1.855267831 | 7.84E-18    | 91.14677204 |
| KIAA1462     | NM_020848    | 111.6936942 | 0.93586538  | 1.21E-12    | 119.3480351 |
| C21orf119    | NR_026845    | 203.6525111 | 42.33890442 | 1.42E-06    | 4.810056232 |
| FBXW2        | NM_012164    | 161.060491  | 2.847651389 | 4.86E-16    | 56.55906181 |
| LRPAP1       | NM_002337    | 138.2033481 | 1.123324698 | 9.77E-17    | 123.0306325 |
| PPARGC1B     | NM_001172698 | 110.162165  | 1.187842259 | 3.47E-11    | 92.74140921 |
| GSR          | NM_000637    | 115.8764507 | 2.69349691  | 6.74E-12    | 43.02082185 |
| ORMDL1       | NM_001128150 | 212.7541851 | 7.008349804 | 2.82E-20    | 30.35724401 |

|               |              |             |             |             |             |
|---------------|--------------|-------------|-------------|-------------|-------------|
| EEF1G         | NM_001404    | 92.75418513 | 7.800689894 | 1.82E-07    | 11.89051051 |
| SERPINB5      | NM_002639    | 86.77477667 | 1.64039507  | 2.90E-09    | 52.89870608 |
| IWS1          | NM_017969    | 104.4478793 | 1.648763199 | 3.61E-11    | 63.34923012 |
| VPS35         | NM_018206    | 89.63191953 | 1.322975547 | 8.06E-10    | 67.75024657 |
| SLC9B2        | NM_178833    | 66.24453119 | 0.590353028 | 2.77E-08    | 112.2117243 |
| TXNDC11       | NM_015914    | 160.5302455 | 1.023964135 | 4.03E-18    | 156.7733088 |
| ROPN1B        | NM_001012337 | 97.46718716 | 1.772199347 | 1.30E-11    | 54.9978688  |
| SIRT1         | NM_012238    | 126.5096539 | 2.518184071 | 2.07E-13    | 50.23844578 |
| SEC22B        | NM_004892    | 113.2844306 | 0.075487164 | 8.78E-19    | 1500.711171 |
| TMEM201       | NM_001010866 | 42.85714286 | 1.811504744 | 0.000239068 | 23.65831114 |
| SPATA5L1      | NM_024063    | 103.9176338 | 1.703599329 | 5.46E-12    | 60.99886989 |
| STYX          | NM_001130701 | 105.2432475 | 1.062923769 | 9.06E-12    | 99.01297775 |
| BTBD7         | NM_001002860 | 109.3667968 | 1.6817584   | 8.08E-11    | 65.03121778 |
| PELP1         | NM_014389    | 129.3667968 | 1.799734612 | 2.61E-14    | 71.88104062 |
| NIFK          | NM_032390    | 120.7953682 | 5.15687323  | 1.60E-11    | 23.42414925 |
| ARHGAP19      | NM_032900    | 100.7953682 | 0.609406056 | 1.97E-12    | 165.3993543 |
| FRYL          | NM_015030    | 110.4272878 | 0.196284223 | 1.46E-13    | 562.5887109 |
| GAS5          | NR_002578    | 187.3050222 | 28.45547832 | 2.30E-10    | 6.582388813 |
| ENTPD3-AS1    | NR_040100    | 48.83655131 | 0.110580246 | 3.55E-07    | 441.6390188 |
| FAM86JP       | NR_024250    | 97.67310262 | 0.847767455 | 4.42E-13    | 115.2121399 |
| NAPA-AS1      | NR_038452    | 88.83655131 | 2.268588709 | 8.06E-10    | 39.15939057 |
| LOC101927204  | NR_110184    | 81.85585918 | 1.381910785 | 1.07E-09    | 59.23382323 |
| HAUS8         | NM_001011699 | 83.91763382 | 4.304003581 | 2.46E-07    | 19.49757528 |
| STEAP1        | NM_012449    | 85.50837026 | 2.13972992  | 3.27E-09    | 39.96222583 |
| PARD6B        | NM_032521    | 105.773493  | 3.60553894  | 4.12E-10    | 29.33638902 |
| ERCC8         | NM_001290285 | 41.06049096 | 0.105715505 | 1.03E-05    | 388.4055692 |
| DNPEP         | NM_012100    | 131.4285714 | 4.56885669  | 1.76E-12    | 28.76618383 |
| ZFHX2         | NM_033400    | 50.16216501 | 3.426166972 | 7.14E-05    | 14.64089912 |
| WFDC3         | NM_080614    | 38.73359358 | 2.225485929 | 0.000656274 | 17.4045556  |
| SRSF6         | NR_034009    | 215.0810825 | 10.01374717 | 4.66E-19    | 21.47858129 |
| ADPRH         | NM_001291949 | 47.30502215 | 1.493210986 | 1.87E-05    | 31.68006572 |
| TXN           | NM_003329    | 120.5302455 | 7.602863233 | 7.09E-10    | 15.85327025 |
| SLC7A1        | NM_003045    | 71.42857143 | 2.305046102 | 8.69E-07    | 30.98791446 |
| DIMT1         | NM_014473    | 158.2033481 | 3.174875372 | 2.55E-17    | 49.82978214 |
| RWDD2B        | NM_016940    | 103.9176338 | 1.549781467 | 9.90E-13    | 67.05308847 |
| VSIG10        | NM_019086    | 129.8970423 | 1.734694491 | 5.02E-14    | 74.88179791 |
| ZBTB8B        | NM_001145720 | 29.10167405 | 0.634688678 | 0.000944092 | 45.85188782 |
| SRSF8         | NM_032102    | 105.9794085 | 23.88523182 | 8.35E-05    | 4.43702658  |
| TRNAU1AP      | NR_003109    | 127.0398994 | 6.846534493 | 1.04E-10    | 18.55535812 |
| EIF2S1        | NM_004094    | 120         | 3.3067486   | 1.16E-11    | 36.28942339 |
| MFI2          | NM_005929    | 81.06049096 | 7.304029884 | 4.45E-06    | 11.09805029 |
| RAB8B         | NM_016530    | 83.91763382 | 0.569102604 | 3.69E-10    | 147.4560707 |
| MPHOSPH6      | NM_005792    | 184.4478793 | 2.35835746  | 6.16E-21    | 78.21031479 |
| IPO9-AS1      | NR_046696    | 75.08108251 | 1.577190522 | 4.71E-07    | 47.60432011 |
| HDCC3         | NR_104447    | 158.4684708 | 35.95668416 | 2.98E-06    | 4.407204795 |
| MAN2A1        | NM_002372    | 135.3462052 | 1.092537512 | 9.65E-15    | 123.8824331 |
| RAB5C         | NM_201434    | 30.42728775 | 0.68272951  | 0.000533537 | 44.56711963 |
| LOC102723582  | NR_125405    | 137.9382254 | 3.187602739 | 1.13E-13    | 43.27334259 |
| PSPH          | NM_004577    | 112.7541851 | 4.776451953 | 5.09E-10    | 23.60626386 |
| PFDN2         | NM_012394    | 113.5495533 | 2.755230911 | 8.08E-12    | 41.21235461 |
| JMJD7-PLA2G4B | NM_001198588 | 141.8558592 | 0.50403815  | 1.21E-20    | 281.4387346 |
| THEM4         | NM_053055    | 203.1222656 | 3.277570442 | 1.26E-20    | 61.97342489 |
| CLIP1         | NM_001247997 | 72.22393965 | 1.329274994 | 8.76E-07    | 54.33333206 |
| RBCK1         | NM_031229    | 123.1222656 | 6.656607819 | 1.59E-10    | 18.49624748 |
| ANP32A        | NM_006305    | 95.08108251 | 3.877305238 | 2.50E-08    | 24.52246513 |
| SERP1         | NM_014445    | 83.91763382 | 7.132203262 | 6.94E-07    | 11.76601826 |
| LRRC28        | NM_001284400 | 125.7142857 | 0.215466526 | 9.98E-17    | 583.4515844 |
| TACC3         | NM_006342    | 54.81595977 | 3.850902972 | 0.000182852 | 14.23457308 |
| ZBTB9         | NM_152735    | 131.6936942 | 13.52800105 | 8.47E-09    | 9.734896806 |
| PSMC6         | NM_002806    | 86.77477667 | 2.721099935 | 4.58E-09    | 31.88959566 |
| ARFGAP2       | NM_001242832 | 72.48906239 | 4.98318462  | 2.01E-06    | 14.54673425 |
| LINC01461     | NR_125761    | 66.77477667 | 1.805048712 | 6.76E-07    | 36.99333776 |
| PDE6D         | NM_001291018 | 144.4478793 | 0.98983988  | 5.95E-17    | 145.9305512 |
| GOLGB1        | NM_004487    | 149.8970423 | 0.93137528  | 2.94E-16    | 160.9416155 |

|               |              |             |             |             |             |
|---------------|--------------|-------------|-------------|-------------|-------------|
| ILF2          | NM_001267809 | 115.611328  | 6.096904576 | 6.75E-10    | 18.96229907 |
| TRIM14        | NM_033219    | 76.40669621 | 2.660022176 | 1.06E-07    | 28.72408241 |
| MTHFS         | NM_006441    | 187.3050222 | 1.209838994 | 7.36E-22    | 154.8181395 |
| VAMP8         | NM_003761    | 97.93822536 | 2.880039663 | 4.10E-10    | 34.00585992 |
| SNAI2         | NM_003068    | 35.61132799 | 0.199709772 | 5.67E-05    | 178.3154008 |
| ITGB1         | NM_002211    | 71.95881691 | 1.398303735 | 3.93E-07    | 51.46150661 |
| IMPAD1        | NM_017813    | 71.42857143 | 0.478786788 | 9.99E-10    | 149.1865966 |
| MICU1         | NM_001195518 | 49.63191953 | 0.586879047 | 1.81E-05    | 84.56924783 |
| RSBN1         | NM_018364    | 63.65251108 | 0.258458246 | 9.13E-09    | 246.2777338 |
| ZC3H7B        | NM_017590    | 78.73359358 | 1.316162894 | 3.91E-08    | 59.82055406 |
| WDR33         | NM_001006623 | 86.77477667 | 1.605186603 | 1.70E-08    | 54.05899632 |
| PDXP          | NM_020315    | 100.5302455 | 5.135205938 | 2.35E-09    | 19.57667262 |
| FBXO36        | NM_174899    | 75.87645073 | 1.057646127 | 8.04E-09    | 71.74086759 |
| PTCD3         | NM_017952    | 136.6718189 | 3.523326248 | 3.84E-13    | 38.79056588 |
| OFD1          | NM_003611    | 88.57142857 | 0.142317414 | 2.43E-14    | 622.3513071 |
| UBALD1        | NM_145253    | 61.06049096 | 4.329911016 | 4.92E-05    | 14.10201982 |
| DDX47         | NM_016355    | 33.28443061 | 1.466206684 | 0.00205111  | 22.70104957 |
| CYB5RL        | NM_001031672 | 92.75418513 | 0.436274955 | 4.98E-12    | 212.6048817 |
| VAPB          | NR_036633    | 40.79536822 | 1.973509513 | 0.00112494  | 20.67148294 |
| HID1          | NM_030630    | 91.75290145 | 0.591896044 | 6.83E-12    | 155.0152301 |
| COX4I1        | NM_001861    | 123.4465956 | 13.02189814 | 7.57E-09    | 9.479923306 |
| RIOK3         | NM_003831    | 52.48906239 | 3.48221248  | 7.18E-05    | 15.07348064 |
| LMBRD1        | NM_018368    | 29.36679679 | 0.021603518 | 0.000178833 | 1359.352559 |
| YTHDC2        | NM_022828    | 109.8970423 | 0.399800835 | 5.01E-14    | 274.8794719 |
| PSEN1         | NM_007318    | 129.3667968 | 0.861191314 | 2.99E-15    | 150.2184179 |
| HERPUD2       | NM_022373    | 110.162165  | 0.636521096 | 4.45E-14    | 173.0691501 |
| TMED8         | NM_213601    | 118.2033481 | 1.699949485 | 7.09E-13    | 69.53344741 |
| ZHX2          | NM_014943    | 56.14157347 | 0.49739479  | 1.58E-06    | 112.8712536 |
| ALG12         | NM_024105    | 102.1209819 | 3.989525465 | 4.41E-10    | 25.59727537 |
| BCKDHA        | NM_000709    | 81.06049096 | 1.658582219 | 1.41E-08    | 48.87336306 |
| PFKFB2        | NM_006212    | 155.611328  | 2.268903187 | 1.28E-16    | 68.58438424 |
| RELL2         | NM_173828    | 118.4684708 | 12.56371967 | 1.98E-08    | 9.429410552 |
| SYMPK         | NM_004819    | 44.18275656 | 3.925613124 | 0.000652458 | 11.25499512 |
| UROD          | NM_000374    | 53.54955335 | 10.6693858  | 0.003261258 | 5.018991193 |
| RPLP0         | NM_053275    | 186.5096539 | 29.5423211  | 6.84E-10    | 6.313303998 |
| KIF2A         | NM_001243952 | 98.46847084 | 0.879518798 | 1.91E-11    | 111.9572101 |
| SLC16A5       | NM_004695    | 221.5907364 | 7.206154716 | 7.45E-21    | 30.75020523 |
| ZNF394        | NM_032164    | 90.95753323 | 0.467805718 | 3.96E-13    | 194.4344196 |
| KIF11         | NM_004523    | 81.06049096 | 1.235339893 | 3.91E-08    | 65.61796591 |
| DENR          | NM_003677    | 169.8970423 | 3.302319543 | 3.03E-18    | 51.44778998 |
| PPP4R1L       | NR_003505    | 117.6731026 | 0.778677853 | 3.49E-14    | 151.1191081 |
| TRIP10        | NM_001288963 | 74.55083703 | 12.85633524 | 0.000163277 | 5.798762685 |
| WDR92         | NR_046234    | 62.85714286 | 0.847109897 | 3.78E-07    | 74.20187518 |
| POMZP3        | NM_152992    | 173.5495533 | 5.834178346 | 8.75E-17    | 29.74704287 |
| OCRL          | NM_000276    | 49.10167405 | 0.856877646 | 8.03E-06    | 57.30301671 |
| SAR1B         | NM_016103    | 101.060491  | 0.366916632 | 2.31E-13    | 275.4317526 |
| TBC1D10A      | NM_001204240 | 100.5302455 | 3.36351982  | 3.95E-09    | 29.88840586 |
| KIAA0355      | NM_014686    | 43.91763382 | 0.508438762 | 4.36E-05    | 86.37743043 |
| ZNF318        | NM_014345    | 54.81595977 | 0.836126713 | 8.10E-07    | 65.55939295 |
| ITGB3BP       | NR_045147    | 172.2239396 | 0.076575074 | 2.28E-28    | 2249.086176 |
| SYCE2         | NM_001105578 | 32.48906239 | 1.440891038 | 0.004835826 | 22.54789677 |
| PES1          | NM_001243225 | 57.93822536 | 3.246365482 | 5.56E-05    | 17.84710492 |
| FAM161B       | NM_152445    | 95.61132799 | 4.579748334 | 8.08E-09    | 20.87698297 |
| HDDC2         | NM_016063    | 57.93822536 | 1.845069584 | 9.01E-06    | 31.40164786 |
| OPRL1         | NM_000913    | 23.65251108 | 0.100537769 | 0.001117675 | 235.2599562 |
| FKBP1A-SDCBP2 | NR_037661    | 138.2033481 | 4.709074634 | 3.03E-12    | 29.34830277 |
| LINC00240     | NR_026775    | 51.69369417 | 0.484437389 | 2.34E-06    | 106.7087211 |
| SMO           | NM_005631    | 43.65251108 | 0.574542551 | 9.68E-06    | 75.97785573 |
| BMP8B         | NM_001720    | 120.5302455 | 2.760477719 | 9.95E-13    | 43.66282135 |
| NET1          | NR_073040    | 78.73359358 | 2.942083086 | 7.21E-08    | 26.76117271 |
| TMED5         | NM_016040    | 52.48906239 | 2.599024432 | 6.10E-05    | 20.19567871 |
| RBM20         | NM_001134363 | 89.36679679 | 0.352946138 | 2.00E-10    | 253.2023648 |
| ARL6IP6       | NM_152522    | 49.89704227 | 3.403862717 | 0.000163665 | 14.65894674 |
| LINC01351     | NR_110717    | 40.53024548 | 4.872943132 | 0.003793138 | 8.317405802 |



|                |              |             |             |             |             |
|----------------|--------------|-------------|-------------|-------------|-------------|
| KIAA1429       | NM_183009    | 38.73359358 | 1.167505287 | 0.000763362 | 33.17637531 |
| TMEM259        | NM_001033026 | 58.46847084 | 3.224359505 | 3.84E-05    | 18.13335974 |
| PPIL4          | NM_139126    | 64.4478793  | 1.45387019  | 1.20E-06    | 44.32849627 |
| USP46-AS1      | NR_125363    | 115.0810825 | 22.54011963 | 1.68E-05    | 5.105610989 |
| MIP            | NM_021933    | 95.08108251 | 4.848530021 | 3.14E-08    | 19.61029056 |
| LOC339874      | NR_038976    | 87.03989941 | 3.184615444 | 2.61E-08    | 27.33136887 |
| TTC13          | NM_001122835 | 69.89704227 | 0.445077796 | 1.32E-08    | 157.0445501 |
| ITPR1-AS1      | NR_108075    | 109.6319195 | 10.20006861 | 9.29E-08    | 10.74815511 |
| TPST2          | NM_003595    | 132.4890624 | 1.545825693 | 7.35E-14    | 85.7076338  |
| ATXN2          | NM_002973    | 70.16216501 | 1.477609789 | 9.15E-07    | 47.48355454 |
| MCAM           | NM_006500    | 40.53024548 | 2.905749467 | 0.002098821 | 13.94829318 |
| BMPR2          | NM_001204    | 43.91763382 | 0.447901919 | 6.03E-05    | 98.05189911 |
| TNKS           | NM_003747    | 61.06049096 | 0.66884687  | 1.03E-06    | 91.29218316 |
| ERCC6L2        | NM_001010895 | 98.73359358 | 0.442976871 | 1.68E-12    | 222.8865662 |
| MTBP           | NM_022045    | 99.5289618  | 0.26676835  | 1.26E-13    | 373.0913417 |
| RPP30          | NM_001104546 | 59.5289618  | 1.731226275 | 5.66E-06    | 34.38543109 |
| RALGAPB        | NM_020336    | 95.87645073 | 1.407266024 | 1.27E-09    | 68.12958539 |
| SNRPB          | NM_198216    | 174.8159598 | 6.028704109 | 2.81E-17    | 28.99726983 |
| PARVA          | NM_018222    | 138.4684708 | 1.606395216 | 1.51E-13    | 86.19825899 |
| ARMCX5-GPRASP2 | NM_001199818 | 49.36679679 | 0.3104963   | 6.48E-06    | 158.9931886 |
| IFRD2          | NM_006764    | 46.24453119 | 5.526436172 | 0.001922204 | 8.367875745 |
| RMND5B         | NM_022762    | 173.2844306 | 5.869780859 | 9.95E-17    | 29.52144803 |
| C17orf97       | NM_001013672 | 47.03989941 | 3.670520888 | 0.000262672 | 12.81559235 |
| MECR           | NM_016011    | 123.9176338 | 2.627291959 | 7.55E-13    | 47.16553613 |
| PTMA           | NM_002823    | 166.2445312 | 34.98170718 | 8.26E-08    | 4.752327561 |
| BCL2L1         | NM_001191    | 77.93822536 | 4.96160203  | 1.97E-06    | 15.70827827 |
| DPP7           | NM_013379    | 103.3873883 | 5.449263672 | 3.14E-09    | 18.97272633 |
| C9orf41        | NM_152420    | 124.713002  | 1.434892312 | 8.63E-14    | 86.91453774 |
| ZBTB39         | NM_014830    | 89.36679679 | 1.282504311 | 5.04E-11    | 69.68147867 |
| AGAP11         | NM_133447    | 80.53024548 | 3.305674202 | 7.67E-08    | 24.36121667 |
| BLOC1S5        | NM_001199322 | 80.53024548 | 0.250558007 | 2.08E-11    | 321.4035996 |
| TMEM151A       | NM_153266    | 58.2033481  | 1.633616912 | 1.66E-06    | 35.62851711 |
| PMPCA          | NM_015160    | 144.713002  | 5.327536275 | 4.31E-14    | 27.16321289 |
| UNC13A         | NM_001080421 | 44.18275656 | 2.235931721 | 0.000657365 | 19.76033353 |
| TNS3           | NM_022748    | 58.2033481  | 0.22402438  | 1.18E-06    | 259.8080983 |
| SMG8           | NM_018149    | 150.6924105 | 9.161654524 | 3.16E-13    | 16.44816557 |
| SLC25A28       | NM_031212    | 41.06049096 | 2.705227763 | 0.000469199 | 15.17820108 |
| STKLD1         | NR_103997    | 74.28571429 | 4.346760977 | 2.12E-06    | 17.08990089 |
| GSTM4          | NM_000850    | 38.99871632 | 2.870789651 | 0.00131376  | 13.58466522 |
| NDUFB9         | NM_005005    | 229.8970423 | 4.619077715 | 9.25E-25    | 49.77120033 |
| NSD1           | NM_022455    | 66.24453119 | 1.270260147 | 2.96E-07    | 52.15036568 |
| DEXI           | NM_014015    | 98.2033481  | 1.745263222 | 9.44E-12    | 56.26850257 |
| CDX2           | NM_001265    | 167.0398994 | 7.309397198 | 1.77E-15    | 22.85275993 |
| ZNHIT6         | NM_017953    | 91.95881691 | 0.891588002 | 4.46E-11    | 103.1404827 |
| NIN            | NM_182946    | 65.97940845 | 0.998403878 | 1.81E-07    | 66.08488802 |
| GGH            | NM_003878    | 89.89704227 | 2.018741194 | 1.41E-09    | 44.53123685 |
| RBMS2          | NM_002898    | 28.57142857 | 1.153643064 | 0.002325575 | 24.76626389 |
| DNAJB12        | NM_017626    | 91.95881691 | 4.987423687 | 3.01E-08    | 18.43814015 |
| LGALS8         | NM_006499    | 43.91763382 | 5.414588749 | 0.002798059 | 8.110982357 |
| LNX2           | NM_153371    | 121.3256137 | 0.578966882 | 4.20E-15    | 209.5553606 |
| HLTF           | NM_003071    | 110.4272878 | 0.807196489 | 1.44E-12    | 136.8034788 |
| INTS10         | NM_018142    | 212.7541851 | 2.238754086 | 4.87E-23    | 95.03240505 |
| EVA1C          | NM_001286556 | 85.97940845 | 2.517864984 | 3.48E-08    | 34.14774382 |
| GTF3C3         | NM_012086    | 119.2638391 | 1.588520496 | 2.92E-13    | 75.07856485 |
| GFPT1          | NM_002056    | 112.2239396 | 0.471940429 | 1.75E-14    | 237.7925958 |
| OLFML2A        | NM_182487    | 49.63191953 | 0.758330263 | 4.55E-06    | 65.44895012 |
| ALDH16A1       | NM_153329    | 186.7747767 | 3.436549601 | 1.82E-20    | 54.34950702 |
| SLC26A11       | NM_001166348 | 46.50965393 | 1.200847248 | 0.000147554 | 38.73069953 |
| UTP20          | NM_014503    | 35.87645073 | 0.145522539 | 6.81E-05    | 246.5353543 |
| PSPC1          | NR_003272    | 102.1209819 | 1.304329113 | 2.79E-10    | 78.29387609 |
| KLHL24         | NM_017644    | 78.46847084 | 1.650871449 | 8.78E-08    | 47.53154516 |
| ENGASE         | NM_001042573 | 104.4478793 | 1.389302078 | 2.43E-13    | 75.18010728 |
| WDR82          | NM_025222    | 97.40797988 | 3.299639674 | 3.95E-09    | 29.52079302 |
| GLI4           | NM_138465    | 147.5701449 | 26.93952687 | 8.39E-08    | 5.477829867 |

|              |              |             |             |             |             |
|--------------|--------------|-------------|-------------|-------------|-------------|
| LOC100419583 | NR_125376    | 62.6512274  | 12.0136153  | 0.001707403 | 5.215018613 |
| MST1R        | NM_002447    | 191.6936942 | 10.13581691 | 5.54E-16    | 18.91250561 |
| GTF2H1       | NM_001142307 | 58.46847084 | 0.158896271 | 1.43E-08    | 367.9662874 |
| NFYB         | NM_006166    | 49.10167405 | 1.371068969 | 4.95E-05    | 35.81269445 |
| RNF20        | NM_019592    | 95.87645073 | 0.553070453 | 2.18E-12    | 173.3530514 |
| UQCR10       | NM_013387    | 89.63191953 | 5.429046748 | 7.46E-08    | 16.5096975  |
| CCDC138      | NM_144978    | 97.93822536 | 0.900387962 | 2.52E-11    | 108.7733616 |
| GOLPH3L      | NM_018178    | 23.91763382 | 0.139463455 | 0.003313529 | 171.4974991 |
| MEF2BNB      | NM_001145784 | 78.99871632 | 7.576481078 | 2.85E-06    | 10.42683477 |
| PKIA         | NM_181839    | 38.46847084 | 0.584209678 | 0.000207328 | 65.84702769 |
| UBR3         | NM_172070    | 96.40669621 | 0.31962805  | 2.66E-11    | 301.6215132 |
| SAMD3        | NM_001258275 | 27.03989941 | 0.465777542 | 0.00490775  | 58.05324861 |
| PCCB         | NM_000532    | 107.5701449 | 0.783411578 | 5.00E-13    | 137.3098738 |
| TMEM209      | NM_032842    | 98.99871632 | 0.790545861 | 1.32E-11    | 125.2283027 |
| USP12-AS2    | NR_046548    | 69.10167405 | 0.813068466 | 6.65E-09    | 84.98875175 |
| ESCO1        | NM_052911    | 113.0193079 | 0.464314317 | 8.05E-15    | 243.411206  |
| RIN1         | NM_004292    | 116.1415735 | 7.418459936 | 1.01E-09    | 15.6557526  |
| TRIM52       | NM_032765    | 109.1016741 | 10.60474166 | 4.23E-08    | 10.28800866 |
| LOC100289361 | NR_034032    | 97.67310262 | 5.987358974 | 0.000162833 | 16.31321974 |
| THEM6        | NM_016647    | 181.5907364 | 17.31681121 | 5.36E-13    | 10.48638425 |
| ERMARD       | NM_001278533 | 91.75290145 | 1.320130526 | 3.47E-10    | 69.50290114 |
| GABARAPL2    | NM_007285    | 72.22393965 | 3.75939851  | 1.08E-06    | 19.21156787 |
| SEMA4C       | NM_017789    | 81.3256137  | 12.94830498 | 4.64E-05    | 6.280792258 |
| PRELID1      | NM_001271828 | 154.8159598 | 16.93550833 | 2.89E-10    | 9.14150061  |
| ZNF581       | NM_016535    | 55.08108251 | 11.07214279 | 0.004439934 | 4.974744593 |
| GALT         | NM_001258332 | 108.1003904 | 13.47805264 | 6.51E-07    | 8.020475455 |
| OSGEPL1      | NM_022353    | 77.67310262 | 3.524988781 | 4.00E-07    | 22.03499286 |
| ETAA1        | NM_019002    | 75.08108251 | 2.185870684 | 2.48E-08    | 34.34836427 |
| LAMTOR4      | NM_001008395 | 117.9382254 | 10.57725901 | 6.67E-09    | 11.15016899 |
| TMEM189      | NM_001162505 | 112.2239396 | 6.683608586 | 3.69E-09    | 16.79092038 |
| PLOD3        | NM_001084    | 82.85714286 | 4.023732403 | 5.67E-08    | 20.59211065 |
| UHRF2        | NR_046386    | 106.5096539 | 0.315759703 | 8.47E-14    | 337.3123709 |
| ARHGAP44     | NM_014859    | 106.2445312 | 0.114462831 | 2.70E-14    | 928.2011495 |
| ZCCHC9       | NM_001131035 | 151.6936942 | 1.050879308 | 2.45E-20    | 144.3493015 |
| GATB         | NM_004564    | 53.01930787 | 1.141877144 | 3.48E-06    | 46.43170954 |
| 3-Mar        | NM_178450    | 146.7747767 | 1.020923733 | 3.38E-16    | 143.7666418 |
| PHIP         | NM_017934    | 92.22393965 | 0.197242496 | 6.62E-12    | 467.5662768 |
| PTS          | NM_000317    | 170.162165  | 6.579032083 | 2.34E-16    | 25.86431604 |
| PAXIP1-AS1   | NR_028090    | 132.4890624 | 15.15525847 | 1.36E-08    | 8.7421183   |
| CSEIL        | NM_001256135 | 149.8970423 | 2.604937638 | 1.84E-15    | 57.54342832 |
| EMD          | NM_000117    | 63.38738834 | 12.09502646 | 0.002207008 | 5.240781287 |
| ZC3H8        | NM_032494    | 151.9588169 | 1.257860578 | 1.14E-17    | 120.807361  |
| DOCK1        | NM_001290223 | 106.5096539 | 0.165860287 | 4.78E-12    | 642.1648976 |
| LOC101929340 | NR_120579    | 83.91763382 | 12.22643375 | 5.13E-05    | 6.863623156 |
| RHOV         | NM_133639    | 161.060491  | 22.45400517 | 8.09E-09    | 7.172907004 |
| CEP104       | NM_014704    | 81.06049096 | 0.831947434 | 8.94E-09    | 97.43463066 |
| LOC101929234 | NR_110304    | 118.4684708 | 13.17525595 | 9.26E-08    | 8.991739616 |
| TMEM167B     | NM_020141    | 49.89704227 | 2.926736505 | 0.00013848  | 17.04869645 |
| SPIDR        | NM_001282916 | 146.2445312 | 0.478930044 | 7.14E-16    | 305.35677   |
| NDUFA7       | NM_005001    | 116.4066962 | 4.626453756 | 2.43E-11    | 25.16110661 |
| RBM4B        | NM_001286135 | 103.9176338 | 7.673890971 | 4.92E-08    | 13.54171361 |
| HDAC7        | NM_015401    | 43.1222656  | 4.531005178 | 0.002832561 | 9.517152134 |
| PLD1         | NM_002662    | 95.87645073 | 0.328650153 | 1.78E-11    | 291.7279963 |
| APEX2        | NM_001271748 | 83.38738834 | 5.066543573 | 2.12E-07    | 16.45843702 |
| FASTKD5      | NM_021826    | 121.3256137 | 3.565410355 | 1.53E-12    | 34.02851331 |
| MAST1        | NM_014975    | 57.93822536 | 2.898973679 | 1.80E-05    | 19.98577144 |
| CYP4F22      | NM_173483    | 38.46847084 | 0.38909712  | 7.93E-05    | 98.86598719 |
| ACLY         | NM_001096    | 137.9382254 | 2.689259128 | 4.29E-14    | 51.29227746 |
| ZNHIT1       | NM_006349    | 72.22393965 | 4.816457897 | 3.09E-06    | 14.99523949 |
| PLSCR1       | NM_021105    | 106.2445312 | 2.817123136 | 4.63E-11    | 37.71383999 |
| PNPLA6       | NM_001166112 | 75.08108251 | 3.427826448 | 1.64E-06    | 21.90340837 |
| KLHDC10      | NM_014997    | 35.08108251 | 0.428294552 | 0.000302387 | 81.90877587 |
| ADAMTSL5     | NM_213604    | 110.162165  | 14.01999318 | 1.50E-07    | 7.857504894 |
| KDM4A-AS1    | NR_033827    | 127.3050222 | 7.232004807 | 1.20E-11    | 17.60300574 |

|           |              |             |             |             |             |
|-----------|--------------|-------------|-------------|-------------|-------------|
| PAGR1     | NM_024516    | 122.3861047 | 28.04934401 | 1.65E-05    | 4.363243027 |
| SGTB      | NM_019072    | 152.4890624 | 1.824678091 | 3.55E-16    | 83.57039148 |
| PRPF38B   | NM_018061    | 170.9575332 | 3.798490105 | 4.52E-19    | 45.00670754 |
| MGEA5     | NM_001142434 | 157.4671872 | 4.396630047 | 3.72E-15    | 35.81542806 |
| EXOSC4    | NM_019037    | 148.1003904 | 12.42034967 | 7.97E-11    | 11.92401135 |
| RNPEP     | NM_020216    | 149.3667968 | 5.034162941 | 1.43E-13    | 29.67063215 |
| LINC00346 | NR_027701    | 48.10039037 | 3.948494603 | 0.000222026 | 12.18195672 |
| H2AFZ     | NM_002106    | 140.2651227 | 15.9616956  | 5.32E-09    | 8.787607926 |
| PRMT3     | NM_001145166 | 93.01930787 | 0.714490708 | 6.59E-11    | 130.1896677 |
| SETDB2    | NM_031915    | 111.222656  | 0.608096326 | 1.53E-14    | 182.9030223 |
| HNRNPA1   | NM_002136    | 121.5907364 | 22.35389766 | 2.85E-06    | 5.439352828 |
| APOL2     | NM_145637    | 55.34620525 | 0.785317352 | 1.61E-06    | 70.47622865 |
| ASRGL1    | NM_001083926 | 69.63191953 | 0.389849418 | 5.36E-09    | 178.6123469 |
| FBXW4     | NM_022039    | 118.4684708 | 1.830454656 | 8.84E-12    | 64.7207897  |
| SMURF1    | NM_001199847 | 77.14285714 | 1.409048552 | 1.93E-07    | 54.7481895  |
| F2R       | NM_001992    | 75.08108251 | 0.995644236 | 8.64E-09    | 75.40954874 |
| PRR12     | NM_020719    | 43.38738834 | 6.004980237 | 0.002950919 | 7.22523416  |
| ATG4B     | NM_178326    | 34.07979883 | 3.037209227 | 0.004012704 | 11.22076099 |
| MBNL2     | NM_144778    | 55.61132799 | 1.462854922 | 5.18E-05    | 38.01561395 |
| APELH     | NM_001640    | 155.3462052 | 13.67148421 | 4.25E-11    | 11.36279009 |
| TIGD4     | NM_145720    | 92.48906239 | 0.531363883 | 1.69E-13    | 174.0597458 |
| DENND5A   | NM_001243254 | 43.1222656  | 0.949689313 | 6.95E-05    | 45.40670828 |
| HAS2-AS1  | NR_002835    | 83.91763382 | 10.46555772 | 9.97E-06    | 8.018457887 |
| HTT       | NM_002111    | 60.26512274 | 0.852829981 | 1.00E-06    | 70.66487356 |
| PPP3CC    | NM_001243975 | 138.4684708 | 0.491954918 | 3.74E-17    | 281.465772  |
| EMC6      | NM_001014764 | 89.63191953 | 10.18185805 | 9.64E-05    | 8.803100481 |
| ZFYVE21   | NM_024071    | 109.3667968 | 4.269722402 | 1.69E-10    | 25.61449821 |
| BCAR3     | NM_001261408 | 40.79536822 | 1.937506416 | 0.001410898 | 21.05560419 |
| C1orf52   | NR_024113    | 121.5907364 | 1.447201655 | 1.83E-15    | 84.01782574 |
| TCHP      | NM_032300    | 70.42728775 | 0.802723926 | 9.10E-09    | 87.73537879 |
| C16orf71  | NM_139170    | 63.91763382 | 4.83869427  | 2.02E-05    | 13.20968638 |
| TMEM115   | NM_007024    | 86.24453119 | 3.699373655 | 8.08E-09    | 23.31327928 |
| EIF4A1    | NM_001204510 | 103.6525111 | 19.54309556 | 1.09E-05    | 5.303791857 |
| STK3      | NM_001256313 | 155.3462052 | 0.218598209 | 2.51E-18    | 710.6472009 |
| RPUSD2    | NM_152260    | 95.34620525 | 7.346556475 | 4.81E-08    | 12.97835327 |
| ZNF706    | NM_016096    | 147.0398994 | 4.277832268 | 1.75E-15    | 34.37252566 |
| RNF168    | NM_152617    | 126.5096539 | 1.140376076 | 1.15E-14    | 110.9367836 |
| ZMAT3     | NM_152240    | 120.7953682 | 0.412497967 | 1.62E-16    | 292.8386993 |
| CCZ1      | NM_015622    | 138.4684708 | 1.986882598 | 1.43E-15    | 69.69131996 |
| GSG2      | NM_031965    | 61.59073644 | 2.867719681 | 6.64E-06    | 21.47725136 |
| SH3D21    | NM_001162530 | 75.08108251 | 7.857648073 | 1.03E-05    | 9.555159738 |
| POLR2L    | NM_021128    | 137.6731026 | 26.55430736 | 1.19E-06    | 5.184586469 |
| PGRMC1    | NM_001282621 | 66.24453119 | 3.774435586 | 2.79E-06    | 17.55084427 |
| SCYL3     | NM_020423    | 96.40669621 | 2.33324292  | 6.11E-10    | 41.31875657 |
| NSDHL     | NM_015922    | 43.65251108 | 0.464971451 | 1.42E-05    | 93.88213186 |
| RPS2      | NM_002952    | 227.5701449 | 38.4226038  | 2.86E-11    | 5.922819445 |
| POMT2     | NM_013382    | 143.6525111 | 1.085818115 | 1.74E-16    | 132.2988713 |
| RAP1A     | NM_001291896 | 29.63191953 | 0.225882035 | 0.001323281 | 131.1831618 |
| ZNF691    | NM_015911    | 69.89704227 | 2.753201842 | 2.44E-07    | 25.3875474  |
| ERGIC2    | NM_016570    | 41.3256137  | 0.597924237 | 4.91E-05    | 69.11513392 |
| EMP1      | NM_001423    | 46.24453119 | 2.434563379 | 0.000176498 | 18.99499992 |
| MMAB      | NM_052845    | 86.77477667 | 2.822689864 | 4.40E-09    | 30.74187418 |
| RSAD1     | NM_018346    | 188.6306359 | 11.71592543 | 1.34E-15    | 16.1003616  |
| SERPINH1  | NM_001235    | 109.6319195 | 14.12409021 | 4.41E-07    | 7.762051776 |
| NUP153    | NM_001278210 | 114.550837  | 1.849133205 | 2.13E-11    | 61.94839654 |
| SSR2      | NM_003145    | 65.71428571 | 4.828688335 | 7.45E-06    | 13.60913796 |
| RRP1      | NM_003683    | 95.61132799 | 3.784164843 | 3.56E-09    | 25.26616359 |
| ZNF638    | NM_001252613 | 107.0398994 | 1.661681978 | 1.82E-10    | 64.41659767 |
| SLC25A13  | NR_027662    | 106.7747767 | 1.426674772 | 3.32E-10    | 74.84170797 |
| RDH10     | NM_172037    | 130.6924105 | 1.886044384 | 9.90E-15    | 69.29445117 |
| RGS16     | NM_002928    | 166.7747767 | 6.435454237 | 1.18E-15    | 25.91499691 |
| TTLL1     | NM_012263    | 87.83526763 | 1.36973966  | 3.14E-09    | 64.12551977 |
| ZNF22     | NM_006963    | 51.95881691 | 8.666350971 | 0.002245212 | 5.995466498 |
| WBP2      | NM_012478    | 41.3256137  | 5.181641877 | 0.00341678  | 7.975389786 |

|           |              |             |             |             |             |
|-----------|--------------|-------------|-------------|-------------|-------------|
| KLC1      | NM_005552    | 144.4478793 | 2.653057722 | 5.90E-15    | 54.44581099 |
| ZNF214    | NM_013249    | 41.85585918 | 1.230990474 | 0.000213744 | 34.00177342 |
| EIF1AD    | NM_001242484 | 198.4684708 | 5.717616372 | 2.18E-20    | 34.71175013 |
| AGPAT4    | NM_020133    | 63.65251108 | 0.727384538 | 3.82E-07    | 87.50874918 |
| CORO1A    | NM_007074    | 51.95881691 | 8.630249946 | 0.002731446 | 6.020546014 |
| ANXA9     | NM_003568    | 27.57014489 | 0.742645027 | 0.004960312 | 37.12425708 |
| ZSWIM4    | NM_023072    | 52.22393965 | 4.001143266 | 0.000437326 | 13.05225436 |
| TMEM245   | NM_032012    | 131.6936942 | 1.50313824  | 2.48E-13    | 87.61249678 |
| UBXN8     | NM_001282189 | 43.38738834 | 1.20677255  | 0.000222328 | 35.95324431 |
| PEX11G    | NM_001270539 | 141.5907364 | 5.846217445 | 9.55E-14    | 24.2192046  |
| DGCR14    | NM_022719    | 78.73359358 | 1.788065152 | 3.10E-09    | 44.03284383 |
| INCENP    | NM_020238    | 40.79536822 | 0.621402569 | 3.49E-05    | 65.65046598 |
| NIPA1     | NM_144599    | 63.38738834 | 1.911512586 | 3.56E-06    | 33.16085324 |
| ACAD10    | NM_001136538 | 133.5495533 | 0.984214056 | 1.00E-14    | 135.6915729 |
| KCTD6     | NM_001128214 | 46.50965393 | 0.827847309 | 1.55E-05    | 56.18144004 |
| CLN6      | NM_017882    | 132.7541851 | 2.990952868 | 2.28E-13    | 44.38524811 |
| ARRDC4    | NM_183376    | 72.75418513 | 4.355911497 | 1.73E-06    | 16.70240205 |
| TLDC1     | NM_020947    | 90.95753323 | 3.845822972 | 2.93E-08    | 23.65099327 |
| NSL1      | NM_001297737 | 158.2033481 | 0.919570157 | 6.14E-18    | 172.0405419 |
| MFS11     | NM_001242534 | 89.89704227 | 5.732303513 | 1.36E-07    | 15.68253357 |
| ZNF644    | NM_032186    | 118.7335936 | 1.559200552 | 4.96E-12    | 76.15030245 |
| TTI1      | NM_014657    | 69.36679679 | 0.939700505 | 2.85E-08    | 73.81798393 |
| KANSL2    | NM_017822    | 189.6319195 | 2.085270725 | 7.99E-21    | 90.93875304 |
| SLC35B1   | NM_005827    | 132.4890624 | 0.753771723 | 4.49E-18    | 175.7681514 |
| CNOT3     | NM_014516    | 41.59073644 | 4.286835735 | 0.002224885 | 9.701966441 |
| PPIEL     | NR_003929    | 89.10167405 | 1.322179415 | 1.49E-09    | 67.3900025  |
| P2RY1     | NM_002563    | 107.0398994 | 3.683842723 | 6.24E-11    | 29.05658777 |
| TRNP1     | NM_001013642 | 197.1428571 | 27.95293357 | 2.60E-11    | 7.052671471 |
| PPFIA1    | NM_003626    | 105.9794085 | 1.825885845 | 2.34E-10    | 58.04273511 |
| GRPEL2    | NM_152407    | 115.8764507 | 6.37467045  | 3.51E-10    | 18.17763783 |
| ZNF579    | NM_152600    | 51.95881691 | 5.827219487 | 0.001052342 | 8.916571106 |
| STK39     | NM_013233    | 54.28571429 | 2.375898027 | 6.20E-05    | 22.84850346 |
| TMEM167A  | NM_174909    | 102.3861047 | 2.01002564  | 2.39E-11    | 50.93771077 |
| CSNK1G1   | NM_022048    | 33.01930787 | 0.745901626 | 0.000623721 | 44.26764433 |
| CHD4      | NM_001273    | 121.060491  | 4.61621037  | 5.38E-11    | 26.22508102 |
| SYAP1     | NM_032796    | 126.5096539 | 0.736403358 | 3.93E-15    | 171.7939667 |
| PPP1R14C  | NM_030949    | 89.10167405 | 0.391233961 | 5.82E-11    | 227.7452442 |
| TRMT44    | NM_152544    | 73.54955335 | 0.490427636 | 3.78E-10    | 149.9702462 |
| DYNLL2    | NM_080677    | 114.550837  | 6.881464401 | 3.49E-10    | 16.64628782 |
| TNRC6A    | NM_014494    | 63.38738834 | 1.708883364 | 5.95E-06    | 37.09286993 |
| MTMR9     | NM_015458    | 186.2445312 | 0.93865996  | 6.97E-23    | 198.4153359 |
| ZNF721    | NM_133474    | 101.3256137 | 2.367369696 | 5.60E-10    | 42.80092538 |
| SLC27A2   | NM_003645    | 115.8764507 | 2.126954325 | 4.84E-12    | 54.47999018 |
| FAM151B   | NM_205548    | 47.30502215 | 0.196091394 | 9.12E-07    | 241.2396648 |
| TOB1      | NM_005749    | 210.162165  | 14.10940956 | 1.26E-16    | 14.89517787 |
| NXT2      | NM_001242617 | 95.34620525 | 0.441404139 | 1.29E-13    | 216.0065954 |
| ZMYM6     | NM_007167    | 64.71300204 | 1.614840065 | 1.53E-06    | 40.07393885 |
| FAM228B   | NR_111929    | 52.22393965 | 3.609568302 | 0.000105739 | 14.46819544 |
| HAUS4     | NM_001166270 | 217.9382254 | 1.710559414 | 3.02E-28    | 127.4075741 |
| TRAPPC8   | NM_014939    | 75.87645073 | 0.02720567  | 4.99E-13    | 2788.994036 |
| FKBP14    | NM_017946    | 35.61132799 | 2.18071588  | 0.002619399 | 16.33010898 |
| RNF219    | NM_024546    | 51.69369417 | 1.257036215 | 4.63E-05    | 41.12347245 |
| SUGT1     | NM_006704    | 78.46847084 | 1.751095268 | 5.88E-08    | 44.81108041 |
| WDR53     | NM_182627    | 81.3256137  | 4.594314399 | 2.37E-07    | 17.70136013 |
| EXOC5     | NM_006544    | 146.5096539 | 0.274483053 | 5.91E-21    | 533.7657539 |
| C2CD2     | NM_015500    | 57.67310262 | 0.535753931 | 5.37E-07    | 107.6484917 |
| UHRF1BP1L | NM_015054    | 141.3256137 | 0.108097172 | 2.17E-21    | 1307.394181 |
| EXOC4     | NM_021807    | 77.67310262 | 0.077619173 | 4.18E-09    | 1000.694802 |
| LRRC23    | NM_201650    | 30.16216501 | 2.892883589 | 0.004645456 | 10.4263321  |
| PTGFRN    | NM_020440    | 80.79536822 | 1.685134831 | 8.04E-08    | 47.94593687 |
| SMPDL3B   | NM_001009568 | 62.12098192 | 0.622473072 | 1.34E-07    | 99.79705903 |
| RNF31     | NM_017999    | 107.0398994 | 2.322137053 | 1.92E-11    | 46.09542717 |
| ZNF776    | NM_173632    | 49.36679679 | 2.06605588  | 3.64E-05    | 23.89422148 |
| HTR7P1    | NR_002774    | 166.2445312 | 5.805391611 | 1.02E-16    | 28.6362303  |

|           |              |             |             |             |             |
|-----------|--------------|-------------|-------------|-------------|-------------|
| ATP2C2    | NM_001286527 | 162.1209819 | 1.91502676  | 1.24E-16    | 84.65729319 |
| UBOX5     | NM_199415    | 121.3256137 | 1.429321271 | 6.73E-13    | 84.88337518 |
| TAPT1-AS1 | NR_027697    | 40.26512274 | 2.205310346 | 0.000914767 | 18.25825685 |
| FANCC     | NM_001243744 | 75.34620525 | 0.741714533 | 2.81E-08    | 101.5838329 |
| RAB17     | NR_033308    | 109.3667968 | 3.147751223 | 5.84E-11    | 34.74442199 |
| ZNF473    | NM_015428    | 38.2033481  | 2.052442928 | 0.001495598 | 18.61359826 |
| SEC24B    | NM_001300813 | 114.8159598 | 0.797404636 | 2.52E-13    | 143.9870732 |
| CHMP3     | NR_036454    | 86.77477667 | 0.395787857 | 2.50E-11    | 219.2456772 |
| PURA      | NM_005859    | 40.26512274 | 2.004970916 | 0.000805004 | 20.08264679 |
| ACTN4     | NM_004924    | 209.1016741 | 6.040752042 | 3.30E-19    | 34.61517251 |
| SNRNP25   | NM_024571    | 106.7747767 | 5.81870137  | 1.31E-09    | 18.3502761  |
| GPR37     | NM_005302    | 49.63191953 | 0.431425664 | 6.04E-07    | 115.0416483 |
| TCP11L1   | NM_018393    | 61.3256137  | 2.447813847 | 7.40E-06    | 25.0532179  |
| TMA16     | NM_018352    | 169.6319195 | 1.530566261 | 1.29E-20    | 110.829517  |
| ANKZF1    | NM_001282792 | 92.48906239 | 3.024942078 | 2.84E-09    | 30.57548211 |
| ALS2CL    | NM_001190707 | 126.2445312 | 2.061893275 | 3.07E-14    | 61.22748093 |
| EXOC6B    | NM_015189    | 167.8352676 | 0.195633531 | 3.13E-19    | 857.9064496 |
| NENF      | NR_026598    | 106.2445312 | 3.958311497 | 1.31E-10    | 26.84087174 |
| ZNF23     | NM_145911    | 118.4684708 | 0.399850158 | 1.55E-17    | 296.2821658 |
| KIAA1324L | NM_001291991 | 60.53024548 | 0.178724965 | 1.50E-07    | 338.6781781 |
| OTUD3     | NM_015207    | 122.3861047 | 2.250154343 | 2.27E-13    | 54.39009331 |
| SMARCD2   | NM_001098426 | 84.71300204 | 15.96743176 | 5.57E-05    | 5.305361771 |
| RINT1     | NM_021930    | 129.3667968 | 1.594753682 | 2.12E-14    | 81.12023708 |
| PSMA4     | NM_001102668 | 141.5907364 | 2.31593919  | 1.40E-16    | 61.13750181 |
| ZP3       | NM_007155    | 30.16216501 | 1.003399022 | 0.000885111 | 30.05999046 |
| CIAO1     | NM_004804    | 82.12098192 | 6.603106423 | 4.25E-07    | 12.43671943 |
| BPHL      | NR_026650    | 154.8159598 | 1.384696754 | 3.77E-18    | 111.8049561 |
| TULP3     | NM_001160408 | 149.3667968 | 2.712493548 | 2.07E-15    | 55.06623117 |
| RSRC2     | NR_036434    | 146.7747767 | 2.563181313 | 1.93E-15    | 57.26273671 |
| TMCO1     | NM_001256165 | 75.61132799 | 0.541708688 | 1.05E-09    | 139.5793156 |
| IFIH1     | NM_022168    | 69.36679679 | 0.875768478 | 2.64E-08    | 79.20677498 |
| REEP5     | NM_005669    | 115.0810825 | 1.841549896 | 4.71E-12    | 62.49142788 |
| ARAP2     | NM_015230    | 51.69369417 | 0.44571343  | 6.08E-06    | 115.9796648 |
| SND1      | NM_014390    | 224.1827566 | 2.09748859  | 2.35E-21    | 106.8815142 |
| STOML2    | NM_001287033 | 144.1827566 | 8.6831966   | 6.49E-12    | 16.60480157 |
| MYLIP     | NM_013262    | 273.0193079 | 3.489541812 | 7.51E-31    | 78.23929976 |
| IMMT      | NM_001100169 | 64.18275656 | 2.900179807 | 5.63E-06    | 22.13061286 |
| NCOA5     | NM_020967    | 164.713002  | 3.594361984 | 1.03E-16    | 45.82537951 |
| COQ4      | NM_016035    | 123.9176338 | 5.023844987 | 1.15E-11    | 24.66589517 |
| SLC37A2   | NM_001145290 | 66.24453119 | 1.28521292  | 5.09E-07    | 51.54362374 |
| NHSL1     | NM_020464    | 26.50965393 | 0.544374234 | 0.004721553 | 48.69748107 |
| TRAM1     | NM_014294    | 145.2432475 | 2.487670499 | 9.37E-16    | 58.38524337 |
| LPAR1     | NM_001401    | 43.91763382 | 0.436129192 | 5.49E-05    | 100.6986796 |
| ZNF770    | NM_014106    | 220         | 2.608648673 | 2.74E-26    | 84.33485209 |
| ETS1      | NM_005238    | 95.34620525 | 1.133089687 | 7.41E-10    | 84.14709471 |
| MMP15     | NM_002428    | 38.73359358 | 5.491413923 | 0.00473099  | 7.053482788 |
| MGC72080  | NR_002822    | 117.6731026 | 4.803478857 | 1.73E-11    | 24.49747488 |
| SNHG15    | NR_003697    | 182.3861047 | 20.0555924  | 3.31E-12    | 9.094027294 |
| DNAJC9    | NM_015190    | 178.9987163 | 10.86430601 | 2.52E-15    | 16.4758537  |
| YWHAB     | NM_139323    | 96.14157347 | 5.269286952 | 8.21E-09    | 18.24565152 |
| CEP192    | NM_032142    | 163.3873883 | 1.050811897 | 5.34E-17    | 155.4868087 |
| TOMM6     | NM_001134493 | 78.99871632 | 11.29578447 | 3.93E-05    | 6.99364586  |
| TEX30     | NM_001286775 | 233.5495533 | 5.186466669 | 2.07E-25    | 45.03057057 |
| TSNAX     | NM_005999    | 99.26383906 | 1.153667756 | 3.65E-11    | 86.04196361 |
| GNPAT     | NM_014236    | 200.2651227 | 2.062521834 | 6.77E-23    | 97.09721342 |
| MRPS22    | NM_020191    | 101.8558592 | 7.917961908 | 5.28E-08    | 12.86389861 |
| PLEKHF1   | NM_024310    | 82.38610466 | 2.242466046 | 7.99E-09    | 36.73906447 |
| HIST2H2BA | NR_027337    | 31.95881691 | 2.840359707 | 0.004328186 | 11.25167944 |
| IRGQ      | NM_001007561 | 81.59073644 | 4.503014036 | 7.37E-08    | 18.11913882 |
| RPN1      | NM_002950    | 115.3462052 | 1.196228638 | 2.77E-13    | 96.42488198 |
| ZNF483    | NM_001007169 | 47.30502215 | 0.023132778 | 1.10E-08    | 2044.934753 |
| COG8      | NM_032382    | 100.7953682 | 21.40570054 | 3.55E-05    | 4.7088096   |
| DPH7      | NM_138778    | 114.875167  | 1.941081469 | 6.61E-13    | 59.1810127  |
| GLCE      | NM_015554    | 139.7940845 | 0.166764253 | 6.38E-20    | 838.2736831 |

|              |              |             |             |             |             |
|--------------|--------------|-------------|-------------|-------------|-------------|
| FAM175A      | NM_139076    | 131.6936942 | 3.184861349 | 3.60E-13    | 41.34989871 |
| MRPL4        | NM_146388    | 133.2844306 | 9.256770188 | 4.48E-11    | 14.39858913 |
| TFIP11       | NM_012143    | 50.16216501 | 4.077888111 | 0.000335935 | 12.30101554 |
| WDR41        | NM_018268    | 99.79408454 | 1.580946194 | 2.88E-10    | 63.12301134 |
| EBPL         | NR_103802    | 81.85585918 | 1.489525428 | 6.25E-09    | 54.95432146 |
| ACTA2        | NM_001141945 | 61.59073644 | 2.516126365 | 5.45E-06    | 24.47839556 |
| LOC100499484 | NR_036526    | 144.1827566 | 0.399354757 | 7.77E-20    | 361.0392865 |
| LOC100996325 | NR_103444    | 60          | 2.563421795 | 9.97E-06    | 23.40621435 |
| FAM86FP      | NR_024254    | 78.73359358 | 4.659175593 | 1.71E-07    | 16.8986105  |
| MCM10        | NM_018518    | 106.2445312 | 1.217142162 | 1.95E-11    | 87.29015762 |
| SAFB2        | NM_014649    | 75.08108251 | 4.488652041 | 2.68E-06    | 16.72686629 |
| ANKRD13A     | NM_033121    | 129.3667968 | 1.180613276 | 1.00E-14    | 109.5759293 |
| RRAGB        | NM_016656    | 35.08108251 | 0.055891681 | 1.11E-05    | 627.6619662 |
| SLC41A1      | NM_173854    | 83.91763382 | 3.35848754  | 1.56E-07    | 24.98673371 |
| LINC01311    | NR_103767    | 112.7541851 | 25.56115679 | 0.000364807 | 4.411153457 |
| ZDHHC3       | NM_001135179 | 81.59073644 | 2.558521455 | 4.57E-08    | 31.88979959 |
| ZNF273       | NM_021148    | 104.4478793 | 0.153059843 | 2.66E-16    | 682.39897   |
| NIPAL3       | NM_020448    | 35.61132799 | 0.314861684 | 0.000204298 | 113.1014974 |
| VIMP         | NM_018445    | 113.0193079 | 3.020470078 | 3.52E-12    | 37.41778762 |
| ABCA7        | NM_019112    | 110.4272878 | 9.485234114 | 2.44E-08    | 11.64202026 |
| DCAF13       | NM_015420    | 124.9781248 | 2.365920492 | 9.66E-14    | 52.82431307 |
| STX7         | NM_003569    | 93.01930787 | 0.531994205 | 2.99E-12    | 174.8502275 |
| ZFP91-CNTF   | NR_024091    | 51.95881691 | 0.857002977 | 3.13E-06    | 60.6285139  |
| MALSU1       | NM_138446    | 106.7747767 | 7.264308399 | 1.31E-08    | 14.69854676 |
| ORC2         | NR_033915    | 89.63191953 | 1.078087107 | 2.14E-09    | 83.139775   |
| UBA6         | NM_018227    | 112.2239396 | 0.453817736 | 4.03E-14    | 247.2885714 |
| LPAR2        | NM_004720    | 79.26383906 | 9.156174887 | 9.64E-06    | 8.656872552 |
| BATF2        | NM_138456    | 32.75418513 | 1.065010097 | 0.001919256 | 30.75481182 |
| BMI1         | NM_005180    | 40.53024548 | 5.756735511 | 0.003683626 | 7.040491161 |
| AKAP12       | NM_005100    | 44.4478793  | 3.473239296 | 0.000391345 | 12.7972407  |
| LAMA3        | NM_001127718 | 55.34620525 | 0.541897998 | 1.57E-06    | 102.133991  |
| DDHD2        | NM_001164232 | 33.81467609 | 1.733843168 | 0.003210937 | 19.50273054 |
| ATR          | NM_001184    | 93.28443061 | 0.785728067 | 8.96E-11    | 118.7235565 |
| HECTD3       | NM_024602    | 78.73359358 | 1.11503519  | 1.05E-10    | 70.61085988 |
| DNAJC2       | NM_001129887 | 117.9382254 | 2.831865645 | 2.72E-12    | 41.64682939 |
| LOC100507291 | NR_121608    | 98.46847084 | 1.144306603 | 2.39E-10    | 86.05077571 |
| MTF1         | NM_005955    | 56.67181894 | 0.903130097 | 7.14E-07    | 62.75044884 |
| SNAI3-AS1    | NR_024402    | 211.9588169 | 6.443808637 | 5.79E-21    | 32.8934065  |
| OGFRL1       | NM_024576    | 88.83655131 | 2.789885655 | 6.59E-09    | 31.84236284 |
| CCDC84       | NR_104051    | 109.3667968 | 7.532974265 | 3.93E-09    | 14.51840839 |
| AMZ2P1       | NR_026903    | 140.0592073 | 7.847483916 | 8.71E-12    | 17.84765777 |
| RBM28        | NM_001166135 | 184.4478793 | 1.207403346 | 5.74E-23    | 152.7640948 |
| DYNLL1-AS1   | NR_038854    | 38.46847084 | 1.806386603 | 0.000366321 | 21.29581275 |
| SEPSECS      | NM_016955    | 55.87645073 | 0.278053399 | 4.47E-08    | 200.9558267 |
| USP27X-AS1   | NR_026742    | 74.55083703 | 4.765658451 | 2.37E-06    | 15.64334452 |
| ANKRD40      | NM_052855    | 112.2239396 | 6.387783257 | 9.58E-10    | 17.56852653 |
| SLC25A23     | NM_024103    | 90.16216501 | 0.575472247 | 3.53E-12    | 156.6750881 |
| CRKL         | NM_005207    | 76.67181894 | 3.770040791 | 1.21E-06    | 20.33713246 |
| THNSL1       | NM_024838    | 135.0810825 | 5.656756904 | 2.87E-12    | 23.87959829 |
| POLA2        | NM_002689    | 135.8764507 | 2.867871917 | 1.68E-14    | 47.37884211 |
| RWDD2A       | NM_033411    | 120.7953682 | 12.30142773 | 1.35E-08    | 9.819621824 |
| SLC16A10     | NM_018593    | 67.03989941 | 0.887375088 | 2.04E-07    | 75.54854794 |
| BOLA3-AS1    | NR_045634    | 34.81595977 | 1.184683292 | 0.000375231 | 29.38841123 |
| DSP          | NM_001008844 | 160.2651227 | 2.564076658 | 5.54E-17    | 62.50402938 |
| ATPIF1       | NM_178190    | 136.1415735 | 14.60994463 | 4.51E-09    | 9.318418167 |
| WDFY1        | NM_020830    | 67.57014489 | 1.326951956 | 9.46E-07    | 50.92131979 |
| ITM2B        | NM_021999    | 214.550837  | 1.969987301 | 1.63E-24    | 108.9097564 |
| PVRL2        | NM_002856    | 83.65251108 | 3.676636763 | 2.72E-07    | 22.75245461 |
| TSNAXIP1     | NM_001288994 | 63.91763382 | 0.808958273 | 2.59E-07    | 79.01227538 |
| ZNF79        | NM_001286696 | 99.5289618  | 0.874265341 | 1.35E-12    | 113.8429687 |
| TMED4        | NM_182547    | 152.2239396 | 15.80144514 | 3.75E-10    | 9.633545432 |
| ITGB3        | NM_000212    | 43.65251108 | 0.584206589 | 3.07E-05    | 74.72101809 |
| CMC4         | NM_001018024 | 60          | 1.68315405  | 5.67E-07    | 35.64736097 |
| OPHN1        | NM_002547    | 52.22393965 | 0.190661341 | 5.84E-06    | 273.9094327 |

|              |              |             |             |             |             |
|--------------|--------------|-------------|-------------|-------------|-------------|
| TSPAN15      | NM_012339    | 110.162165  | 1.139001908 | 4.72E-12    | 96.71815671 |
| BIN3         | NM_018688    | 60.53024548 | 1.422343977 | 6.23E-06    | 42.55668563 |
| DLL4         | NM_019074    | 149.6319195 | 3.213123547 | 2.47E-16    | 46.56899037 |
| EID1         | NM_014335    | 110.162165  | 1.43993313  | 2.59E-12    | 76.50505619 |
| JAK1         | NM_002227    | 177.6731026 | 1.553153366 | 4.85E-18    | 114.3950794 |
| PTRF         | NM_012232    | 152.4890624 | 5.317380082 | 5.43E-14    | 28.67748027 |
| BDKRB2       | NM_000623    | 54.55083703 | 0.317295693 | 1.50E-07    | 171.9242907 |
| RPL21P28     | NR_026911    | 126.2445312 | 8.942390607 | 3.03E-10    | 14.1175371  |
| PARP2        | NM_001042618 | 269.8970423 | 3.26088938  | 8.12E-32    | 82.76792337 |
| TBPL1        | NM_001253676 | 66.24453119 | 2.162883736 | 1.60E-06    | 30.6278743  |
| ZNF767P      | NR_027788    | 115.611328  | 1.578442392 | 1.15E-11    | 73.24393248 |
| ST3GAL4-AS1  | NR_033839    | 97.67310262 | 5.978279463 | 2.73E-08    | 16.33799544 |
| FAM60A       | NM_001135811 | 132.7541851 | 3.167921127 | 2.03E-13    | 41.90577347 |
| BRWD1        | NM_001007246 | 100.7953682 | 2.293074491 | 2.65E-11    | 43.95642994 |
| DLG1-AS1     | NR_038289    | 87.03989941 | 17.47813749 | 0.000243129 | 4.979929895 |
| MKNK2        | NM_017572    | 111.6936942 | 11.7793166  | 6.72E-08    | 9.482187967 |
| TJAP1        | NM_001146016 | 126.2445312 | 4.11047798  | 6.06E-12    | 30.71285914 |
| PHACTR4      | NM_023923    | 30.69241049 | 0.874364619 | 0.000969121 | 35.10253026 |
| NINJ1        | NM_004148    | 180.7953682 | 3.95426464  | 3.13E-19    | 45.72161569 |
| RFTN1        | NM_015150    | 26.50965393 | 0.254855166 | 0.00419737  | 104.0185071 |
| PDZD8        | NM_173791    | 165.2432475 | 1.43039573  | 2.01E-17    | 115.5227494 |
| ATG9A        | NM_024085    | 77.93822536 | 3.468488747 | 1.52E-07    | 22.47036997 |
| UNC50        | NM_014044    | 115.611328  | 6.681067863 | 1.06E-09    | 17.30431877 |
| PRPF39       | NM_017922    | 158.4684708 | 0.274325646 | 2.58E-23    | 577.6655337 |
| GCC1         | NM_024523    | 173.5495533 | 5.655701352 | 1.13E-17    | 30.68577044 |
| F2RL1        | NM_005242    | 196.1415735 | 6.817345681 | 2.63E-18    | 28.77095906 |
| TSPYL2       | NM_022117    | 92.48906239 | 2.021288528 | 5.50E-11    | 45.75747653 |
| THAP11       | NM_020457    | 68.83655131 | 6.218207684 | 3.78E-05    | 11.07015957 |
| TPRN         | NM_001128228 | 166.5096539 | 7.515773252 | 7.08E-15    | 22.15469365 |
| OPLAH        | NM_017570    | 153.2844306 | 2.485242956 | 7.24E-18    | 61.6778453  |
| HMG20B       | NM_006339    | 97.67310262 | 20.29372809 | 8.95E-05    | 4.812969909 |
| ALG2         | NM_033087    | 135.8764507 | 1.928538413 | 1.56E-16    | 70.45566209 |
| TMEM70       | NM_017866    | 224.9781248 | 6.744044037 | 5.33E-23    | 33.35952783 |
| GTF2E1       | NM_005513    | 70.42728775 | 1.314671765 | 2.13E-07    | 53.5702444  |
| LOC100996348 | NR_121631    | 106.7747767 | 1.353684646 | 1.73E-12    | 78.87714247 |
| BCKDHB       | NM_183050    | 169.8970423 | 0.615424877 | 5.64E-19    | 276.0646322 |
| ZBTB3        | NM_024784    | 95.34620525 | 4.598883766 | 7.62E-09    | 20.73246685 |
| XPOT         | NM_007235    | 98.2033481  | 3.580350957 | 1.21E-08    | 27.42841394 |
| RARA         | NM_001145302 | 103.6525111 | 6.210143583 | 5.04E-09    | 16.6908397  |
| SSBP4        | NM_032627    | 55.34620525 | 8.98462614  | 0.002696695 | 6.160101086 |
| ZDHHC24      | NM_207340    | 112.2239396 | 6.298162832 | 6.10E-10    | 17.81851988 |
| LOH12CR1     | NM_001300742 | 128.6306359 | 0.161814404 | 2.68E-18    | 794.9269821 |
| STX8         | NR_033656    | 47.57014489 | 0.288498262 | 1.44E-05    | 164.8888437 |
| SERTAD3      | NM_203344    | 137.6731026 | 14.61610269 | 1.54E-09    | 9.419275815 |
| EXOSC10      | NM_001001998 | 104.4478793 | 1.064755204 | 3.16E-12    | 98.0956739  |
| POLR2J4      | NR_003655    | 58.73359358 | 2.792917035 | 1.32E-05    | 21.02948024 |
| EIF4G2       | NM_001418    | 145.5083703 | 8.026875771 | 1.02E-12    | 18.12764697 |
| GTSF1        | NM_144594    | 109.8970423 | 1.163540055 | 1.17E-13    | 94.45058791 |
| UBXN2B       | NM_001077619 | 112.2239396 | 0.188789926 | 2.13E-17    | 594.4381772 |
| GRWD1        | NM_031485    | 58.2033481  | 4.212524511 | 3.41E-05    | 13.81673815 |
| GMCL1        | NM_178439    | 65.24324752 | 0.195439959 | 1.57E-09    | 333.8275752 |
| SPATA2L      | NM_152339    | 178.7335936 | 34.2536596  | 5.67E-09    | 5.217941548 |
| TAF2         | NM_003184    | 158.9987163 | 0.054927295 | 2.16E-26    | 2894.712284 |
| IREB2        | NM_004136    | 52.22393965 | 1.418985205 | 6.53E-05    | 36.80372386 |
| MRPS30       | NM_016640    | 84.4478793  | 0.319634364 | 1.35E-12    | 264.2015027 |
| SOCS3        | NM_003955    | 198.7335936 | 15.84529565 | 5.60E-15    | 12.54211963 |
| C16orf70     | NM_025187    | 118.7335936 | 0.660589077 | 7.48E-15    | 179.7389597 |
| OVOL1        | NM_004561    | 64.18275656 | 3.517936573 | 7.99E-06    | 18.24443256 |
| RALGAPA2     | NM_020343    | 97.67310262 | 0.131141401 | 4.35E-12    | 744.7922758 |
| MRPS17       | NM_015969    | 111.6936942 | 10.61978238 | 2.61E-08    | 10.51751252 |
| GPR3         | NM_005281    | 106.7747767 | 9.439836248 | 6.26E-08    | 11.31108357 |
| GGPS1        | NM_001037277 | 74.55083703 | 6.12979074  | 8.77E-06    | 12.16205254 |
| PIM1         | NM_001243186 | 112.2239396 | 1.523143333 | 6.97E-14    | 73.679172   |
| STAU1        | NM_017452    | 63.38738834 | 1.279935019 | 4.12E-06    | 49.52391128 |

|                 |              |             |             |             |             |
|-----------------|--------------|-------------|-------------|-------------|-------------|
| PPIC            | NM_000943    | 135.8764507 | 4.774286478 | 2.99E-13    | 28.46005395 |
| COIL            | NM_004645    | 99.5289618  | 1.052119255 | 4.41E-12    | 94.59855555 |
| UQCRH           | NM_001297565 | 81.59073644 | 6.735118545 | 1.03E-06    | 12.11422425 |
| LPAR5           | NM_020400    | 78.99871632 | 2.390601448 | 1.14E-08    | 33.04554023 |
| PLXNA3          | NM_017514    | 57.67310262 | 1.183704118 | 1.81E-06    | 48.72256651 |
| PLA2G7          | NM_001168357 | 67.83526763 | 3.011237615 | 9.67E-07    | 22.52737124 |
| PRICKLE3        | NM_006150    | 80          | 11.78697257 | 4.52E-05    | 6.787154166 |
| GAA             | NM_001079804 | 169.6319195 | 3.87131808  | 7.15E-18    | 43.81761355 |
| SETD8           | NM_020382    | 70.42728775 | 3.755951195 | 3.30E-06    | 18.75085274 |
| RPL37           | NM_000997    | 136.1415735 | 18.54668687 | 1.90E-08    | 7.340479432 |
| PTCD1           | NM_015545    | 93.54955335 | 4.501200428 | 1.22E-08    | 20.78324546 |
| TRIM33          | NM_015906    | 60.79536822 | 1.062257786 | 9.15E-07    | 57.23221707 |
| OPN3            | NM_014322    | 80.26512274 | 0.059161092 | 1.54E-13    | 1356.721465 |
| CCSAP           | NM_145257    | 97.14285714 | 5.712702759 | 5.54E-08    | 17.0047106  |
| PPP1R2          | NM_001291504 | 169.3667968 | 3.027933563 | 2.18E-17    | 55.9347797  |
| DPY19L3         | NM_001172774 | 61.3256137  | 1.420519427 | 9.40E-06    | 43.17126014 |
| FGFR3           | NM_001163213 | 134.550837  | 5.081118561 | 1.56E-12    | 26.48055451 |
| ZNF213          | NM_001134655 | 100.7953682 | 3.874328419 | 7.47E-10    | 26.01621683 |
| ABHD3           | NM_138340    | 206.5096539 | 3.173186798 | 2.37E-20    | 65.07957681 |
| C8orf44-SGK3    | NM_001204173 | 67.57014489 | 1.784586264 | 2.18E-06    | 37.86319902 |
| DHX34           | NM_014681    | 118.4684708 | 0.791945661 | 2.31E-14    | 149.5916661 |
| TMEM216         | NM_016499    | 129.8970423 | 6.935917108 | 3.00E-11    | 18.72817109 |
| RRP36           | NM_033112    | 72.48906239 | 7.093478293 | 8.52E-06    | 10.21911387 |
| TAX1BP1         | NM_006024    | 135.3462052 | 0.458143138 | 3.73E-17    | 295.4234039 |
| POP5            | NM_015918    | 132.2239396 | 14.75208932 | 1.36E-08    | 8.963065284 |
| NAGPA-AS1       | NR_038913    | 50.42728775 | 1.83002943  | 8.56E-06    | 27.55545181 |
| THUMPD3         | NM_015453    | 177.9382254 | 1.35457925  | 1.78E-22    | 131.3605131 |
| NUP85           | NM_024844    | 124.1827566 | 4.311859181 | 1.54E-11    | 28.80028112 |
| METAP1          | NM_015143    | 157.9382254 | 1.410239272 | 5.34E-17    | 111.9939209 |
| C6orf120        | NM_001029863 | 103.6525111 | 6.456497755 | 5.96E-09    | 16.05398391 |
| CSRP2           | NM_001300965 | 117.9382254 | 3.203834939 | 1.04E-11    | 36.81157975 |
| RSG1            | NM_030907    | 86.77477667 | 4.291506326 | 2.26E-08    | 20.22012088 |
| SUCLG1          | NM_003849    | 36.40669621 | 1.349242158 | 0.00153028  | 26.98307046 |
| NAT10           | NM_001144030 | 95.87645073 | 0.986171211 | 6.76E-11    | 97.22089805 |
| ATP6V1B1-AS1    | NR_110274    | 42.12098192 | 1.581370582 | 5.89E-05    | 26.63574396 |
| MRPL48          | NM_016055    | 149.8970423 | 0.573844665 | 5.92E-19    | 261.2153626 |
| MRS2            | NM_020662    | 138.9987163 | 1.710678588 | 1.15E-16    | 81.25355478 |
| NGRN            | NR_028052    | 155.3462052 | 5.159707234 | 3.57E-15    | 30.10756196 |
| TATDN1          | NR_027427    | 141.5907364 | 3.82835669  | 2.60E-13    | 36.98472946 |
| ENTPD5          | NM_001249    | 160.5302455 | 0.874773509 | 5.63E-19    | 183.5106388 |
| GADD45GIP1      | NM_052850    | 164.1827566 | 13.7360041  | 8.96E-12    | 11.9527306  |
| LDHD            | NM_153486    | 84.97812478 | 3.319583957 | 6.51E-09    | 25.59902864 |
| TASP1           | NM_017714    | 101.3256137 | 0.030854725 | 1.76E-15    | 3283.957736 |
| AGO1            | NM_012199    | 169.6319195 | 1.870692749 | 7.49E-19    | 90.67866417 |
| HGS             | NM_004712    | 87.03989941 | 9.8000264   | 4.94E-06    | 8.881598463 |
| TTC38           | NM_017931    | 135.8764507 | 3.523713076 | 1.43E-13    | 38.56058873 |
| TRMT11          | NM_001031712 | 138.7335936 | 0.220614498 | 3.68E-21    | 628.8507556 |
| MRPS31          | NM_005830    | 115.0810825 | 0.481420002 | 1.68E-14    | 239.0450791 |
| DNAJC14         | NM_032364    | 60.79536822 | 10.17030837 | 0.000689555 | 5.977731057 |
| OSBPL11         | NM_022776    | 107.8352676 | 1.155908348 | 1.77E-11    | 93.29049987 |
| RPF2            | NM_032194    | 92.75418513 | 1.364549273 | 1.21E-09    | 67.97422925 |
| RPL7L1          | NM_198486    | 103.1222656 | 4.369371631 | 3.60E-10    | 23.6011661  |
| PPM1G           | NM_177983    | 143.1222656 | 2.17726441  | 4.61E-16    | 65.73490337 |
| EEF1A2          | NM_001958    | 40          | 5.638676917 | 0.003825145 | 7.093862725 |
| USP5            | NM_003481    | 78.99871632 | 2.599955198 | 7.67E-08    | 30.38464524 |
| CDCA7           | NM_031942    | 91.95881691 | 4.488512862 | 1.06E-08    | 20.48759127 |
| TMED9           | NM_017510    | 151.9588169 | 0.793629787 | 1.82E-20    | 191.4731774 |
| FZD1            | NM_003505    | 58.99871632 | 8.257184362 | 0.000280299 | 7.145137342 |
| PHOSPHO2-KLHL23 | NM_001199290 | 161.3256137 | 2.858736367 | 1.82E-16    | 56.4324908  |
| MAP4K3          | NM_001270425 | 108.1003904 | 0.146696717 | 2.48E-14    | 736.8971355 |
| USP48           | NM_001032730 | 138.2033481 | 0.926743845 | 1.09E-15    | 149.1278835 |
| CENPV           | NM_181716    | 126.7747767 | 6.432775682 | 6.61E-11    | 19.70763212 |
| E2F5            | NM_001083588 | 43.65251108 | 1.925172182 | 0.000463975 | 22.674601   |
| CSF1            | NM_172210    | 43.38738834 | 3.730378436 | 0.001860964 | 11.63082756 |



|              |              |             |             |             |             |
|--------------|--------------|-------------|-------------|-------------|-------------|
| HMG2N        | NM_005517    | 75.61132799 | 10.6817851  | 0.000138601 | 7.078529222 |
| FAM21A       | NM_001291398 | 75.61132799 | 0.376161504 | 1.18E-09    | 201.0076181 |
| LEPROT       | NM_001198681 | 87.03989941 | 1.614123322 | 4.43E-10    | 53.92394634 |
| RASA2        | NM_006506    | 155.611328  | 0.155504269 | 3.74E-22    | 1000.688466 |
| ACAA1        | NM_001130410 | 61.85585918 | 4.928054532 | 1.96E-05    | 12.55178058 |
| CKAP2        | NM_001098525 | 92.48906239 | 4.089174597 | 2.02E-08    | 22.61802723 |
| RB1CC1       | NM_001083617 | 73.28443061 | 1.023834569 | 1.67E-08    | 71.57839052 |
| SLC25A16     | NM_152707    | 96.14157347 | 0.631655923 | 1.04E-12    | 152.2056074 |
| GPC1         | NM_002081    | 83.65251108 | 2.318417703 | 1.71E-08    | 36.08172546 |
| MED17        | NM_004268    | 158.2033481 | 3.553258049 | 1.01E-15    | 44.52346155 |
| RNF215       | NM_001017981 | 57.67310262 | 8.129097174 | 0.001069172 | 7.094650413 |
| ALDH1B1      | NM_000692    | 141.3256137 | 4.614966008 | 1.38E-14    | 30.62332712 |
| GFM2         | NM_170681    | 96.67181894 | 2.626121322 | 4.43E-10    | 36.81163477 |
| EEF1A1       | NM_001402    | 1497.526394 | 215.2865666 | 1.24E-79    | 6.955967658 |
| CAMKK1       | NM_032294    | 51.69369417 | 2.693506849 | 6.44E-05    | 19.19196685 |
| RAET1K       | NR_024045    | 126.5096539 | 3.806621901 | 1.66E-13    | 33.23410027 |
| EFHD2        | NM_024329    | 161.5907364 | 3.029252351 | 1.78E-17    | 53.34343848 |
| SEL1L3       | NM_001297592 | 31.69369417 | 1.218614494 | 0.001259588 | 26.00797407 |
| MOB3A        | NM_130807    | 107.3050222 | 4.230666496 | 3.70E-10    | 25.36362114 |
| MLST8        | NM_001199174 | 86.24453119 | 6.144273868 | 4.86E-07    | 14.03657015 |
| ADAP2        | NM_018404    | 75.08108251 | 0.098343134 | 3.61E-12    | 763.4603432 |
| FAM53A       | NM_001174070 | 35.61132799 | 0.019742229 | 5.15E-06    | 1803.814928 |
| L3MBTL1      | NM_032107    | 163.9176338 | 5.426366222 | 1.68E-15    | 30.20762461 |
| LOC553103    | NR_110997    | 129.3667968 | 0.696366831 | 5.34E-15    | 185.7739213 |
| CLK1         | NM_001162407 | 140.5302455 | 5.530389978 | 1.35E-13    | 25.41054899 |
| FAM86C2P     | NR_024249    | 131.9588169 | 1.690726995 | 1.12E-15    | 78.04856566 |
| GTF2A2       | NM_004492    | 132.4890624 | 0.404928049 | 2.62E-19    | 327.1916155 |
| EME1         | NM_001166131 | 149.8970423 | 14.23500904 | 1.20E-10    | 10.53016839 |
| CCNK         | NM_001099402 | 100.7953682 | 0.555808828 | 1.05E-12    | 181.3489874 |
| SLC9A3R1     | NM_004252    | 244.1827566 | 9.521452655 | 3.42E-21    | 25.64553597 |
| FAM110C      | NM_001077710 | 72.48906239 | 1.655350396 | 5.18E-08    | 43.79076634 |
| HERC5        | NM_016323    | 98.46847084 | 0.271615329 | 4.31E-14    | 362.5291377 |
| AGPS         | NM_003659    | 121.5907364 | 0.107552935 | 1.07E-17    | 1130.519929 |
| NDUFS6       | NM_004553    | 84.4478793  | 2.324377649 | 1.18E-09    | 36.33139363 |
| KATNA1       | NM_007044    | 121.8558592 | 1.342273389 | 2.77E-13    | 90.78318932 |
| SEC14L2      | NM_001291932 | 115.3462052 | 11.81091863 | 7.86E-08    | 9.766065522 |
| TERF2        | NM_005652    | 66.50965393 | 5.627500358 | 1.96E-05    | 11.81868498 |
| NFE2L3       | NM_004289    | 137.1428571 | 4.635103153 | 7.02E-13    | 29.58787596 |
| MIATNB       | NR_110543    | 88.10039037 | 1.137051797 | 5.49E-10    | 77.48142221 |
| ZNF766       | NM_001010851 | 58.2033481  | 2.194853608 | 9.23E-06    | 26.51810029 |
| MCM8-AS1     | NR_110101    | 95.34620525 | 2.628862921 | 1.45E-09    | 36.26899085 |
| CTTN         | NM_005231    | 103.9176338 | 4.672009508 | 3.54E-09    | 22.24259896 |
| LSM1         | NR_045493    | 92.48906239 | 2.851697966 | 2.88E-09    | 32.43297975 |
| PCTP         | NM_021213    | 159.2638391 | 2.946667599 | 1.33E-16    | 54.04879706 |
| PLA2G16      | NM_007069    | 75.61132799 | 1.709771389 | 1.47E-07    | 44.22306307 |
| SPATA20      | NM_001258372 | 133.5495533 | 4.842385855 | 1.10E-13    | 27.57928784 |
| USF1         | NM_007122    | 103.3873883 | 4.208504182 | 2.44E-10    | 24.56630286 |
| LMAN1        | NM_005570    | 86.50965393 | 1.040872841 | 1.08E-09    | 83.11260558 |
| PPP1R37      | NM_019121    | 75.87645073 | 1.776256215 | 1.12E-07    | 42.71706417 |
| EDEM1        | NM_014674    | 127.3050222 | 1.553056926 | 1.31E-14    | 81.9706091  |
| RERE         | NM_012102    | 141.3256137 | 0.889821099 | 7.49E-15    | 158.8247502 |
| SHANK3       | NM_033517    | 51.42857143 | 1.055109039 | 4.91E-06    | 48.74242331 |
| WDR90        | NM_145294    | 40.79536822 | 2.523178116 | 0.000733876 | 16.16824748 |
| XRN2         | NM_012255    | 108.5714286 | 0.256559906 | 8.40E-15    | 423.1815882 |
| MESDC1       | NM_022566    | 129.8970423 | 18.60180386 | 1.81E-07    | 6.983034725 |
| DTYMK        | NR_033255    | 104.1827566 | 5.031145132 | 2.50E-09    | 20.70756335 |
| C4orf33      | NM_001099783 | 65.97940845 | 0.049531292 | 1.25E-10    | 1332.075258 |
| TTC9C        | NM_173810    | 78.46847084 | 3.814845766 | 1.82E-07    | 20.56923809 |
| FNIP1        | NM_133372    | 107.8352676 | 0.627423037 | 1.71E-12    | 171.8701121 |
| DEPDC1B      | NM_018369    | 121.5907364 | 0.50276256  | 3.89E-15    | 241.8452487 |
| AVEN         | NM_020371    | 51.69369417 | 0.481641038 | 6.31E-06    | 107.3282593 |
| PRKCQ-AS1    | NR_036502    | 107.3050222 | 4.507615245 | 9.87E-11    | 23.80527537 |
| LOC100270746 | NR_026776    | 91.95881691 | 11.95242299 | 0.000153908 | 7.693738499 |
| SIRT6        | NM_016539    | 106.7747767 | 6.292668159 | 5.69E-09    | 16.96812449 |

|              |              |             |             |             |             |
|--------------|--------------|-------------|-------------|-------------|-------------|
| DEPDC1-AS1   | NR_110671    | 81.3256137  | 1.789366006 | 3.75E-08    | 45.44940132 |
| UROS         | NM_000375    | 212.7541851 | 3.769247674 | 1.42E-21    | 56.44473473 |
| MRTO4        | NM_016183    | 101.060491  | 9.725624529 | 3.00E-07    | 10.39115695 |
| LINC00936    | NR_028138    | 154.8159598 | 37.01710665 | 3.28E-06    | 4.182281485 |
| FBXL6        | NM_024555    | 172.7541851 | 31.06448439 | 1.22E-08    | 5.561147675 |
| GSK3B        | NM_002093    | 147.0398994 | 0.611759577 | 3.38E-16    | 240.3556967 |
| ISG20        | NM_002201    | 47.30502215 | 2.338095967 | 6.91E-05    | 20.23228422 |
| CLCN7        | NM_001114331 | 67.30502215 | 0.279860553 | 2.78E-10    | 240.4948516 |
| VPS16        | NM_080413    | 49.10167405 | 0.93951561  | 3.86E-05    | 52.26275492 |
| FAM173A      | NM_023933    | 209.3667968 | 25.98879497 | 3.23E-11    | 8.056040959 |
| WDR62        | NM_001083961 | 87.03989941 | 1.560271714 | 8.79E-09    | 55.78509092 |
| ANKLE2       | NM_015114    | 57.67310262 | 4.359618912 | 0.000127769 | 13.22893211 |
| LINC01185    | NR_033980    | 72.22393965 | 1.272110709 | 1.41E-07    | 56.77488536 |
| CRY1         | NM_004075    | 61.3256137  | 0.290622054 | 1.60E-07    | 211.015003  |
| NDUFA13      | NM_015965    | 93.28443061 | 1.168230504 | 3.40E-12    | 79.85104846 |
| EDEM2        | NM_018217    | 99.79408454 | 1.941254323 | 1.07E-10    | 51.40701214 |
| PERP         | NM_022121    | 157.9382254 | 1.579153317 | 1.42E-18    | 100.0144974 |
| TMF1         | NM_007114    | 103.9176338 | 0.525363624 | 3.92E-13    | 197.8013496 |
| ZMAT5        | NM_019103    | 127.0398994 | 1.106836309 | 1.15E-14    | 114.7774954 |
| PXN-AS1      | NR_038924    | 44.71300204 | 5.508429412 | 0.001055396 | 8.117196155 |
| IKBKE        | NM_001193322 | 59.5289618  | 2.930418583 | 6.92E-06    | 20.31414971 |
| AUP1         | NM_181575    | 80.79536822 | 11.73191438 | 7.77E-05    | 6.886801728 |
| DDIT4L       | NM_145244    | 123.3873883 | 8.987362356 | 4.98E-10    | 13.72898782 |
| EFR3A        | NM_015137    | 210.9575332 | 0.658419192 | 4.51E-26    | 320.4000368 |
| ERBB3        | NM_001005915 | 140         | 6.774658987 | 4.32E-13    | 20.66524681 |
| OAZ2         | NM_001301302 | 108.8365513 | 9.462940584 | 2.51E-08    | 11.50134573 |
| EFNA4        | NM_182690    | 220.2651227 | 4.937971501 | 4.80E-24    | 44.60639813 |
| TFAP2E       | NM_178548    | 120.5302455 | 2.903052872 | 4.46E-12    | 41.51844654 |
| FAM24B-CUZD1 | NR_037915    | 59.5289618  | 1.416535387 | 6.04E-06    | 42.02433795 |
| SOX4         | NM_003107    | 114.8159598 | 14.75788835 | 3.60E-07    | 7.779972109 |
| KLHL12       | NM_021633    | 207.5701449 | 0.663115825 | 2.97E-28    | 313.0224569 |
| DUSP5        | NM_004419    | 69.63191953 | 14.85183706 | 0.001516981 | 4.688438155 |
| ELF3         | NM_001114309 | 178.9987163 | 7.217465254 | 9.42E-17    | 24.80077285 |
| ESYT1        | NM_015292    | 135.3462052 | 7.119871067 | 5.16E-12    | 19.00964273 |
| FBXO45       | NM_001105573 | 49.89704227 | 1.655387399 | 5.77E-05    | 30.14221463 |
| LINC01057    | NR_104131    | 97.93822536 | 0.237899214 | 3.42E-12    | 411.6794824 |
| TSC22D2      | NM_014779    | 80.53024548 | 1.753144821 | 4.85E-08    | 45.93473654 |
| FRY-AS1      | NR_103839    | 35.34620525 | 1.566306891 | 0.000995503 | 22.56658988 |
| SH3BGRL2     | NM_031469    | 51.95881691 | 0.310789848 | 1.31E-06    | 167.1831217 |
| AMACR        | NM_014324    | 174.0797988 | 2.049682167 | 6.53E-20    | 84.93014266 |
| UGGT2        | NM_020121    | 150.4272878 | 0.409005334 | 1.55E-17    | 367.7880835 |
| BRPF1        | NM_004634    | 80.79536822 | 1.073352465 | 9.22E-10    | 75.27384609 |
| DNAJB9       | NM_012328    | 59.5289618  | 11.27054331 | 0.001431886 | 5.281818291 |
| WDR36        | NM_139281    | 89.89704227 | 0.804913402 | 4.10E-10    | 111.685359  |
| CENPH        | NM_022909    | 121.8558592 | 0.261499981 | 7.26E-19    | 465.9880229 |
| SNF          | NM_006142    | 224.713002  | 44.85669363 | 7.33E-09    | 5.009575692 |
| CBX2         | NM_032647    | 175.8764507 | 12.98217691 | 6.89E-14    | 13.54753151 |
| CNBP         | NM_001127193 | 162.6512274 | 5.954006349 | 1.51E-15    | 27.31794658 |
| VPS28        | NM_183057    | 167.5701449 | 8.350245948 | 5.55E-15    | 20.06768973 |
| EID2B        | NM_152361    | 75.08108251 | 9.960025769 | 0.0002027   | 7.538241793 |
| KLHL7        | NR_033329    | 153.2844306 | 4.148844881 | 9.40E-16    | 36.94629108 |
| ZNF680       | NM_001130022 | 106.2445312 | 1.156839267 | 7.23E-12    | 91.84035692 |
| CDCA4        | NM_017955    | 106.5096539 | 6.20959117  | 2.19E-09    | 17.15244225 |
| DOCK6        | NM_020812    | 37.67310262 | 2.122323463 | 0.00220614  | 17.75087694 |
| POLR3G       | NM_006467    | 177.6731026 | 1.44853803  | 1.12E-20    | 122.6568436 |
| MDP1         | NM_001199822 | 97.93822536 | 19.71316861 | 9.02E-05    | 4.968162517 |
| PDLIM7       | NM_213636    | 178.9987163 | 15.94961044 | 2.83E-13    | 11.22276416 |
| PRKCH        | NM_006255    | 112.4890624 | 0.508704863 | 1.21E-12    | 221.128341  |
| TMOD3        | NM_014547    | 149.6319195 | 1.450445031 | 1.35E-15    | 103.1627648 |
| CNNM2        | NM_199077    | 178.4684708 | 4.262465121 | 1.20E-18    | 41.86977858 |
| GHITM        | NM_014394    | 38.99871632 | 1.563709129 | 0.000397819 | 24.9398789  |
| LNX1         | NM_001126328 | 37.14285714 | 1.225489835 | 0.000315174 | 30.30858035 |
| PRUNE        | NM_021222    | 70.42728775 | 1.18095333  | 8.00E-08    | 59.63596186 |
| ABCD1        | NM_000033    | 100.7953682 | 2.207353166 | 3.65E-11    | 45.6634533  |

|              |              |             |             |             |             |
|--------------|--------------|-------------|-------------|-------------|-------------|
| ACVR2A       | NM_001278579 | 63.38738834 | 0.441286726 | 1.04E-07    | 143.6421824 |
| ARPC4        | NM_005718    | 113.0193079 | 4.113865803 | 1.77E-11    | 27.47277458 |
| ARHGAP4      | NM_001164741 | 72.75418513 | 1.824054095 | 9.14E-08    | 39.88597999 |
| LINC011106   | NR_027244    | 109.3667968 | 11.18590007 | 6.31E-08    | 9.777201304 |
| SIL1         | NM_001037633 | 172.7541851 | 0.948206778 | 1.22E-18    | 182.1904136 |
| ARHGAP1      | NM_004308    | 127.0398994 | 0.782730016 | 1.85E-16    | 162.3036    |
| RRAS2        | NM_001177315 | 51.69369417 | 0.401341115 | 2.34E-06    | 128.8023883 |
| RGP1         | NM_001080496 | 109.6319195 | 2.17272031  | 1.48E-12    | 50.45836733 |
| MYH9         | NM_002473    | 203.6525111 | 2.633139906 | 2.04E-20    | 77.34207764 |
| SH3PXD2B     | NM_001017995 | 51.69369417 | 1.250139818 | 8.82E-06    | 41.35033012 |
| GPAM         | NM_020918    | 172.7541851 | 0.72423417  | 1.44E-22    | 238.5336018 |
| CCZ1B        | NM_198097    | 129.1016741 | 1.205531281 | 1.83E-15    | 107.0911026 |
| PLAA         | NM_001031689 | 60.53024548 | 2.196101689 | 8.34E-06    | 27.56258773 |
| SOX18        | NM_018419    | 62.85714286 | 3.137951593 | 1.29E-05    | 20.03126594 |
| FTSJ3        | NM_017647    | 173.2844306 | 21.57588727 | 6.44E-11    | 8.031393029 |
| C10orf35     | NM_145306    | 75.08108251 | 2.138313382 | 2.68E-08    | 35.11229137 |
| MDN1         | NM_014611    | 92.48906239 | 1.427610497 | 8.83E-09    | 64.78592204 |
| TTL          | NM_153712    | 25.71428571 | 0.67581642  | 0.003681967 | 38.04921714 |
| FKBP1B       | NM_004116    | 86.24453119 | 3.090792318 | 2.07E-08    | 27.90369663 |
| LOC100129917 | NR_036512    | 104.1827566 | 7.826055853 | 8.01E-08    | 13.31229402 |
| VTA1         | NM_001286371 | 69.89704227 | 0.773624112 | 3.94E-08    | 90.35013408 |
| MTIF2        | NM_001005369 | 87.57014489 | 1.812751035 | 2.23E-09    | 48.30787196 |
| DFNB31       | NM_015404    | 101.3256137 | 1.683689282 | 7.61E-10    | 60.18070838 |
| MTSS1        | NM_001282974 | 44.18275656 | 0.693369166 | 7.02E-05    | 63.72183643 |
| RAET1L       | NM_130900    | 35.61132799 | 0.877064794 | 0.000279437 | 40.60284739 |
| UTP15        | NM_032175    | 73.28443061 | 0.27662238  | 1.32E-10    | 264.9258917 |
| TACO1        | NM_016360    | 166.5096539 | 4.624602882 | 1.67E-17    | 36.00517886 |
| SELO         | NM_031454    | 86.50965393 | 4.664757453 | 7.08E-08    | 18.54537022 |
| RAB3B        | NM_002867    | 107.0398994 | 0.849769513 | 1.64E-12    | 125.9634499 |
| USP36        | NM_025090    | 79.26383906 | 3.614696844 | 9.36E-08    | 21.9282121  |
| PLK1         | NM_005030    | 112.4890624 | 5.287912544 | 2.99E-10    | 21.2728674  |
| NCAPG        | NM_022346    | 69.36679679 | 0.789060449 | 1.29E-07    | 87.9106244  |
| TSTD2        | NM_139246    | 77.93822536 | 3.05481349  | 1.21E-07    | 25.51325167 |
| SPAG4        | NM_003116    | 131.6936942 | 32.74522648 | 1.80E-05    | 4.0217677   |
| ZNF860       | NM_001137674 | 94.55083703 | 2.784943496 | 4.45E-10    | 33.95072006 |
| MYSM1        | NM_001085487 | 109.8970423 | 1.476097692 | 1.15E-11    | 74.45106303 |
| SMPD2        | NM_003080    | 164.4478793 | 18.92484205 | 9.31E-11    | 8.689524535 |
| FAM114A2     | NM_018691    | 141.3256137 | 0.434613929 | 2.38E-18    | 325.1750674 |
| GNL3L        | NM_019067    | 80.53024548 | 1.828627029 | 3.11E-08    | 44.03863895 |
| ERN1         | NM_001433    | 204.713002  | 2.337123175 | 3.32E-21    | 87.59187546 |
| CERS6        | NM_001256126 | 78.73359358 | 0.712363383 | 9.05E-09    | 110.5244815 |
| PRMT7        | NM_001290018 | 158.2033481 | 1.377033503 | 7.89E-18    | 114.8870727 |
| SNRNP27      | NM_006857    | 126.5096539 | 1.100128262 | 2.87E-16    | 114.9953677 |
| RPL29        | NM_000992    | 138.7335936 | 15.78142441 | 6.09E-09    | 8.790942436 |
| SNHG5        | NR_003038    | 200.7953682 | 21.70312212 | 5.80E-12    | 9.251911644 |
| ARVCF        | NM_001670    | 100.5302455 | 5.060642421 | 9.50E-09    | 19.86511536 |
| ZNF131       | NR_123720    | 117.9382254 | 1.701619125 | 2.87E-12    | 69.30941456 |
| RNF25        | NM_022453    | 90.69241049 | 2.780538277 | 5.34E-10    | 32.61685381 |
| OSMR-AS1     | NR_109951    | 124.4478793 | 0.656561159 | 1.72E-14    | 189.5449914 |
| SLC20A1      | NM_005415    | 197.6731026 | 6.468935408 | 3.31E-18    | 30.55728496 |
| LOC100288911 | NR_037631    | 57.14285714 | 1.246738412 | 0.000271857 | 45.83387869 |
| POMGNT2      | NM_032806    | 169.6319195 | 1.856663873 | 5.82E-20    | 91.36382842 |
| PSMD3        | NM_002809    | 90.42728775 | 4.037896194 | 1.29E-08    | 22.3946539  |
| RPL32        | NM_001007073 | 160.5302455 | 12.27952203 | 2.00E-12    | 13.0730044  |
| TRIM37       | NM_001005207 | 123.3873883 | 0.848731338 | 4.30E-14    | 145.3786172 |
| YWHAQ        | NM_006826    | 98.46847084 | 2.312348701 | 7.69E-10    | 42.58374648 |
| VPS4B        | NM_004869    | 103.9176338 | 1.324525229 | 1.69E-11    | 78.45651525 |
| HEMK1        | NM_016173    | 72.75418513 | 5.153413649 | 2.69E-06    | 14.11766842 |
| FAM212A      | NM_203370    | 123.1222656 | 12.71210449 | 7.03E-08    | 9.685435306 |
| STX10        | NM_001271611 | 55.08108251 | 7.636095308 | 0.001475077 | 7.21325236  |
| QRICH1       | NM_198880    | 79.26383906 | 2.708667366 | 1.02E-07    | 29.26303911 |
| SNAPC5       | NM_006049    | 98.2033481  | 7.528170596 | 5.97E-08    | 13.04478251 |
| LOC101929655 | NR_120365    | 55.08108251 | 0.209947936 | 6.69E-07    | 262.3559129 |
| ZZZ3         | NM_015534    | 95.34620525 | 0.860150834 | 8.80E-11    | 110.848239  |

|            |              |             |             |             |             |
|------------|--------------|-------------|-------------|-------------|-------------|
| SERAC1     | NR_073096    | 114.8159598 | 0.024566079 | 7.06E-21    | 4673.760132 |
| COPS2      | NM_004236    | 67.83526763 | 0.416446713 | 1.22E-09    | 162.8906303 |
| IDE        | NM_004969    | 144.1827566 | 0.928694513 | 2.29E-16    | 155.2531587 |
| RASA3      | NM_007368    | 92.48906239 | 0.445885116 | 8.36E-11    | 207.42801   |
| TRAM2      | NM_012288    | 175.0810825 | 3.075928857 | 1.57E-17    | 56.91974381 |
| SESN1      | NM_014454    | 35.08108251 | 0.791976438 | 0.000544036 | 44.29561391 |
| MTOR       | NM_004958    | 97.40797988 | 0.43745849  | 1.72E-11    | 222.6679377 |
| MRPS6      | NM_032476    | 117.6731026 | 1.55547485  | 4.19E-12    | 75.65091947 |
| TRIM72     | NM_001008274 | 71.95881691 | 13.95957263 | 0.000807473 | 5.154800852 |
| EIF3I      | NM_003757    | 98.46847084 | 9.527024013 | 1.53E-07    | 10.33570092 |
| BEND3      | NM_001080450 | 70.16216501 | 0.037178325 | 2.02E-12    | 1887.179274 |
| EMB        | NM_198449    | 98.46847084 | 0.882383726 | 6.76E-11    | 111.5937068 |
| CAV1       | NM_001753    | 70.42728775 | 4.513914688 | 5.21E-06    | 15.60226381 |
| COMMD3     | NM_012071    | 120.7953682 | 2.544786341 | 4.28E-14    | 47.46778394 |
| TNS1       | NM_022648    | 26.77477667 | 0.433446201 | 0.004443528 | 61.77185687 |
| ARHGAP10   | NM_024605    | 63.91763382 | 0.259063664 | 3.24E-07    | 246.7255845 |
| SORBS3     | NM_001018003 | 49.10167405 | 4.899980358 | 0.00044307  | 10.02078998 |
| NPRL2      | NM_006545    | 121.8558592 | 15.0585876  | 6.43E-08    | 8.092117427 |
| IL17RB     | NM_018725    | 126.2445312 | 4.145572126 | 1.96E-12    | 30.45286087 |
| VMAC       | NM_001017921 | 73.01930787 | 6.121932824 | 6.87E-06    | 11.9274925  |
| SEMA3G     | NM_020163    | 103.1222656 | 0.452925727 | 1.94E-15    | 227.6803002 |
| MS4A10     | NM_206893    | 21.06049096 | 0.202254417 | 0.00460699  | 104.1287071 |
| TSPAN5     | NM_005723    | 70.42728775 | 2.88366189  | 1.28E-06    | 24.42286594 |
| GOLGA2     | NM_004486    | 72.22393965 | 7.389476208 | 2.36E-05    | 9.773891628 |
| ID2        | NM_002166    | 133.0193079 | 27.88267737 | 4.13E-06    | 4.770679161 |
| PARP4      | NM_006437    | 178.2033481 | 1.886031607 | 2.69E-18    | 94.48587575 |
| ANGEL1     | NM_015305    | 129.8970423 | 0.086981121 | 2.57E-21    | 1493.39352  |
| CHADL      | NM_138481    | 21.06049096 | 0.312534988 | 0.00460699  | 67.38602646 |
| PER1       | NM_002616    | 73.54955335 | 4.83173477  | 8.23E-07    | 15.22218351 |
| KIF15      | NM_020242    | 69.36679679 | 0.296697912 | 8.93E-09    | 233.7960393 |
| TAF7       | NM_005642    | 161.3256137 | 2.714451822 | 1.08E-17    | 59.43211531 |
| DMWD       | NM_004943    | 55.61132799 | 8.813385934 | 0.002210197 | 6.309870962 |
| POM121C    | NM_001099415 | 129.8970423 | 3.840192177 | 1.37E-11    | 33.82566191 |
| ZNF326     | NM_182975    | 186.7747767 | 0.536030127 | 5.46E-28    | 348.4408193 |
| TFPT       | NM_013342    | 75.34620525 | 17.25393624 | 0.001169667 | 4.366899482 |
| NRBF2      | NM_001282405 | 155.3462052 | 3.057755998 | 3.24E-16    | 50.80399004 |
| MIPEP      | NM_005932    | 64.18275656 | 0.398302542 | 2.23E-07    | 161.1407154 |
| EED        | NM_152991    | 153.2844306 | 2.821445815 | 1.65E-15    | 54.32832691 |
| TMEM185B   | NM_024121    | 89.89704227 | 6.408432729 | 2.12E-07    | 14.02792946 |
| C19orf68   | NM_199341    | 40.79536822 | 5.503590433 | 0.004979808 | 7.412500751 |
| SLC35E1    | NM_024881    | 37.40797988 | 0.831082868 | 8.47E-05    | 45.01113103 |
| SYNE4      | NM_001039876 | 135.8764507 | 9.355279479 | 2.69E-11    | 14.52403972 |
| SLC25A39   | NM_016016    | 133.5495533 | 6.52403235  | 1.53E-12    | 20.47040023 |
| TMEM170A   | NM_145254    | 223.6525111 | 3.295210098 | 1.82E-24    | 67.87200344 |
| DSCR3      | NM_006052    | 40.26512274 | 2.24683509  | 0.001052145 | 17.92081801 |
| SLCO4A1    | NM_016354    | 95.08108251 | 6.248839891 | 1.72E-07    | 15.21579752 |
| CFAP43     | NM_025145    | 124.4478793 | 0.43602783  | 8.68E-16    | 285.4126977 |
| C12orf10   | NM_021640    | 111.9588169 | 5.973619801 | 6.59E-10    | 18.74220667 |
| FHOD1      | NM_013241    | 156.1415735 | 12.89814691 | 4.24E-12    | 12.10573694 |
| ARHGAP23   | NM_001199417 | 49.10167405 | 3.408508096 | 0.00019537  | 14.40562049 |
| ZBTB2      | NM_020861    | 75.61132799 | 5.425898071 | 2.51E-06    | 13.93526509 |
| GPAA1      | NM_003801    | 120.7953682 | 10.30007568 | 2.83E-09    | 11.72761948 |
| DCUN1D5    | NM_032299    | 100.2651227 | 0.886459364 | 2.22E-11    | 113.10741   |
| OTUD6B-AS1 | NR_110439    | 58.73359358 | 2.788961445 | 1.19E-05    | 21.05930639 |
| WDR18      | NM_024100    | 67.57014489 | 1.377317456 | 2.40E-08    | 49.05923801 |
| EPS8       | NM_004447    | 127.0398994 | 1.14496351  | 8.14E-14    | 110.9554133 |
| YARS       | NM_003680    | 127.5701449 | 3.001704754 | 3.18E-13    | 42.49923139 |
| GATA2-AS1  | NR_125398    | 121.3256137 | 4.657483281 | 3.74E-11    | 26.04960799 |
| KMT2E      | NM_182931    | 80.79536822 | 1.71165438  | 9.97E-08    | 47.2030856  |
| FBXO30     | NM_032145    | 129.1016741 | 0.254197665 | 2.86E-20    | 507.8790714 |
| CRTC1      | NM_015321    | 63.1222656  | 1.425664235 | 5.43E-06    | 44.27568851 |
| NOL6       | NM_022917    | 60.26512274 | 4.587706155 | 3.15E-05    | 13.13622118 |
| ADPRHL2    | NM_017825    | 144.4478793 | 8.924763702 | 1.28E-12    | 16.18506485 |
| DDX60      | NM_017631    | 75.34620525 | 0.111230358 | 9.26E-11    | 677.3888598 |

|           |              |             |             |             |             |
|-----------|--------------|-------------|-------------|-------------|-------------|
| ZBTB33    | NM_006777    | 75.08108251 | 3.672300475 | 1.89E-07    | 20.44524489 |
| PEX26     | NM_017929    | 36.40669621 | 3.087016783 | 0.001379572 | 11.79348826 |
| ADPRM     | NM_020233    | 137.9382254 | 1.924779684 | 4.28E-16    | 71.66442294 |
| FUOM      | NM_001098483 | 77.40797988 | 8.263564301 | 1.72E-05    | 9.367383984 |
| RIPK2     | NM_003821    | 207.8352676 | 1.008655223 | 5.58E-27    | 206.0518429 |
| SH3BP1    | NM_018957    | 60.53024548 | 4.096616963 | 3.72E-05    | 14.77566637 |
| NFRKB     | NM_001143835 | 152.4890624 | 2.374985002 | 9.84E-17    | 64.20632647 |
| C16orf74  | NM_206967    | 109.6319195 | 4.469171443 | 1.01E-09    | 24.5307035  |
| KEAP1     | NM_203500    | 84.18275656 | 6.86061921  | 1.46E-06    | 12.27043128 |
| JRKL      | NM_001261833 | 106.3037385 | 4.664347985 | 3.41E-10    | 22.79069632 |
| NECAP1    | NR_024260    | 89.10167405 | 2.419734468 | 6.59E-09    | 36.82291393 |
| COX8A     | NM_004074    | 138.4684708 | 9.023879108 | 1.20E-10    | 15.34467264 |
| MED11     | NM_001001683 | 197.9382254 | 7.111491711 | 4.72E-18    | 27.83357324 |
| SNRPF     | NM_003095    | 89.36679679 | 1.410486333 | 7.49E-11    | 63.35885339 |
| MARCKSL1  | NR_052852    | 191.4285714 | 41.72580336 | 4.77E-08    | 4.587774375 |
| CRYM-AS1  | NR_026675    | 86.24453119 | 6.142986748 | 6.84E-07    | 14.03951119 |
| NYAP1     | NM_173564    | 35.08108251 | 2.445316455 | 0.002172578 | 14.34623418 |
| CLCN3     | NM_001829    | 115.611328  | 0.91986806  | 3.30E-13    | 125.6825115 |
| ENPP5     | NM_001290072 | 132.7541851 | 3.909870527 | 3.90E-13    | 33.95360133 |
| WDSUB1    | NM_152528    | 84.4478793  | 1.178962572 | 5.12E-09    | 71.62897387 |
| PHYH      | NM_001037537 | 61.59073644 | 2.186715038 | 1.84E-06    | 28.16587227 |
| H2AFY2    | NM_018649    | 107.0398994 | 2.269678277 | 1.26E-10    | 47.16082472 |
| SDCCAG8   | NM_006642    | 152.2239396 | 0.642442049 | 6.53E-17    | 236.9457914 |
| STX18-AS1 | NR_037888    | 187.0398994 | 0.220065411 | 9.56E-25    | 849.9286591 |
| ZSCAN21   | NM_145914    | 107.5701449 | 2.883355212 | 3.09E-11    | 37.30728162 |
| ZNF41     | NM_153380    | 48.83655131 | 1.975493489 | 0.000115037 | 24.72119072 |
| CPNE7     | NM_014427    | 63.38738834 | 6.305075243 | 0.000143272 | 10.05339126 |
| HRSP12    | NM_005836    | 235.0810825 | 2.3169234   | 3.55E-28    | 101.4626044 |
| TCTA      | NM_022171    | 92.48906239 | 17.81673574 | 5.78E-05    | 5.191133983 |
| OGFRP1    | NR_036498    | 89.63191953 | 6.094805825 | 1.19E-07    | 14.70627976 |
| RPS4X     | NM_001007    | 77.93822536 | 10.04623751 | 2.40E-05    | 7.757951699 |
| NAMPT     | NM_005746    | 77.67310262 | 3.181629128 | 1.40E-07    | 24.41299708 |
| ZNF264    | NM_003417    | 113.0193079 | 1.609615595 | 9.05E-13    | 70.21509251 |
| ZBTB17    | NM_001287603 | 74.28571429 | 1.86692525  | 1.30E-07    | 39.79040634 |
| HSPA4L    | NM_014278    | 136.6718189 | 0.907893192 | 6.64E-16    | 150.5373321 |
| MOSPD1    | NM_019556    | 77.14285714 | 1.696074121 | 3.34E-08    | 45.48318744 |
| GLRX3     | NM_001199868 | 58.73359358 | 1.193328177 | 4.54E-06    | 49.21830784 |
| COL6A1    | NM_001848    | 160         | 0.922563578 | 3.12E-21    | 173.4297818 |
| C10orf54  | NM_022153    | 120.7953682 | 1.603257857 | 7.40E-14    | 75.34369327 |
| CAMK2N1   | NM_018584    | 58.2033481  | 2.050924411 | 1.66E-06    | 28.37908008 |
| LARP1B    | NM_178043    | 112.2239396 | 1.537314629 | 1.32E-11    | 72.9999816  |
| GPR124    | NM_032777    | 52.22393965 | 2.406119431 | 7.46E-05    | 21.70463318 |
| MKKS      | NR_072977    | 103.9176338 | 2.641838759 | 8.42E-11    | 39.33534303 |
| ZNF445    | NM_181489    | 103.6525111 | 0.458814405 | 1.85E-14    | 225.9138114 |
| GJB5      | NM_005268    | 72.22393965 | 5.713393426 | 4.59E-06    | 12.64116336 |
| TTC37     | NM_014639    | 111.9588169 | 0.198177694 | 1.18E-15    | 564.941567  |
| LRR1      | NM_203467    | 98.99871632 | 3.88177821  | 1.00E-09    | 25.50344481 |
| SEC62     | NM_003262    | 61.06049096 | 1.84336193  | 5.16E-06    | 33.12452642 |
| TP53RK    | NM_033550    | 78.73359358 | 3.593459164 | 7.10E-08    | 21.91025137 |
| PTK2      | NM_001199649 | 97.67310262 | 1.689898877 | 3.78E-09    | 57.7981937  |
| IAH1      | NM_001039613 | 89.63191953 | 4.731302862 | 2.44E-08    | 18.94444768 |
| SLC25A11  | NM_003562    | 73.01930787 | 17.20108467 | 0.001120129 | 4.245040896 |
| KTI12     | NM_138417    | 94.81595977 | 8.114569157 | 1.02E-06    | 11.6846573  |
| EFR3B     | NM_014971    | 52.22393965 | 0.123053898 | 5.58E-07    | 424.398905  |
| SRD5A1    | NM_001047    | 114.550837  | 2.683242492 | 6.67E-12    | 42.69119819 |
| ZNF275    | NM_001080485 | 77.40797988 | 0.644156857 | 7.75E-10    | 120.1694573 |
| SDHAP2    | NR_003265    | 96.93694168 | 7.029391077 | 1.04E-07    | 13.79023312 |
| TDP2      | NM_016614    | 144.1827566 | 2.42690176  | 7.55E-16    | 59.4102155  |
| CHPF      | NM_024536    | 120.2651227 | 16.38591021 | 1.18E-07    | 7.33954484  |
| TIMM13    | NM_012458    | 121.060491  | 19.84243596 | 1.82E-06    | 6.101090167 |
| RILPL2    | NM_145058    | 109.1016741 | 2.024415616 | 2.85E-12    | 53.89292257 |
| AKTIP     | NM_022476    | 74.55083703 | 0.295853661 | 3.13E-11    | 251.9855148 |
| UBE2N     | NM_003348    | 95.34620525 | 1.962470148 | 6.11E-10    | 48.58479266 |
| LAD1      | NM_005558    | 107.3050222 | 6.722466576 | 3.57E-09    | 15.96215034 |

|              |              |             |             |             |             |
|--------------|--------------|-------------|-------------|-------------|-------------|
| CD40         | NM_001250    | 89.63191953 | 0.879061629 | 6.80E-12    | 101.9631805 |
| SMURF2       | NM_022739    | 145.9794085 | 3.748171238 | 4.28E-14    | 38.94683545 |
| KTN1-AS1     | NR_027123    | 129.1016741 | 11.77565648 | 2.73E-09    | 10.96343751 |
| CALM1        | NM_006888    | 198.2033481 | 8.707481385 | 9.87E-18    | 22.76241996 |
| LARS         | NM_020117    | 49.63191953 | 1.213053887 | 0.000126453 | 40.91485139 |
| KDM1A        | NM_001009999 | 156.4066962 | 1.266050565 | 2.72E-17    | 123.5390596 |
| TMEM206      | NM_001198862 | 115.8764507 | 1.641705743 | 2.03E-12    | 70.58295998 |
| ADA          | NM_000022    | 88.83655131 | 2.281458321 | 3.62E-09    | 38.93849407 |
| SIAH2        | NM_005067    | 184.1827566 | 3.729183551 | 2.93E-19    | 49.38956586 |
| TSR1         | NM_018128    | 77.93822536 | 11.62992177 | 9.92E-05    | 6.701526195 |
| NRAS         | NM_002524    | 58.2033481  | 5.377407093 | 7.33E-05    | 10.8236827  |
| PHF11        | NM_001040443 | 66.50965393 | 1.496709716 | 8.98E-07    | 44.43724338 |
| TTL3         | NM_001025930 | 63.91763382 | 4.88770716  | 3.18E-05    | 13.07722245 |
| LOC100505938 | NR_125740    | 103.1222656 | 0.515959057 | 7.56E-13    | 199.8652105 |
| GCN1L1       | NM_006836    | 129.3667968 | 2.105742054 | 4.08E-13    | 61.43525344 |
| KLHL11       | NM_018143    | 141.3256137 | 1.756172644 | 3.49E-17    | 80.47364488 |
| MBLAC2       | NM_203406    | 149.3667968 | 4.06167136  | 1.69E-15    | 36.77471257 |
| MRPL54       | NM_172251    | 81.59073644 | 6.986588798 | 7.49E-07    | 11.67819358 |
| AP3B1        | NM_003664    | 129.6319195 | 0.384778359 | 1.10E-14    | 336.9002352 |
| USP37        | NM_020935    | 118.2033481 | 1.196148131 | 7.47E-12    | 98.81999149 |
| SESTD1       | NM_178123    | 52.22393965 | 0.767294103 | 8.08E-06    | 68.06248014 |
| KCTD11       | NM_001002914 | 106.7747767 | 16.04055307 | 2.87E-06    | 6.656552066 |
| CASP6        | NM_001226    | 138.4684708 | 1.448975829 | 1.23E-16    | 95.56299568 |
| PAFAH1B1     | NM_000430    | 132.2239396 | 1.382344209 | 1.48E-13    | 95.65196485 |
| TIMP1        | NM_003254    | 43.1222656  | 5.640713288 | 0.003669503 | 7.644824935 |
| FDXACB1      | NR_038364    | 67.03989941 | 6.835263471 | 7.55E-05    | 9.807946643 |
| MYO15A       | NM_016239    | 38.99871632 | 2.850191242 | 0.00125842  | 13.68284196 |
| MED18        | NM_017638    | 66.77477667 | 5.967574794 | 2.31E-05    | 11.18960029 |
| FCHSD1       | NM_033449    | 95.61132799 | 4.747781143 | 2.59E-08    | 20.1381077  |
| SGCB         | NM_000232    | 74.55083703 | 1.33783192  | 1.47E-08    | 55.7251146  |
| LOC148413    | NR_015434    | 98.73359358 | 21.36306251 | 8.26E-05    | 4.62169661  |
| RPS9         | NM_001013    | 235.0810825 | 19.65433075 | 8.21E-17    | 11.96077778 |
| PHC1         | NM_004426    | 60          | 2.369244508 | 5.66E-06    | 25.32452847 |
| DOHH         | NM_031304    | 107.0398994 | 0.320181237 | 9.86E-17    | 334.3103434 |
| KCTD21       | NM_001029859 | 106.7747767 | 1.568317137 | 1.12E-12    | 68.08238854 |
| HSDL2        | NM_032303    | 49.89704227 | 0.890300638 | 1.32E-05    | 56.04516063 |
| ACTR1A       | NM_005736    | 102.3861047 | 6.924520018 | 2.05E-08    | 14.7860219  |
| C9orf43      | NM_152786    | 87.30502215 | 1.85872523  | 5.92E-10    | 46.97037558 |
| KLF3         | NM_016531    | 109.3667968 | 3.718945213 | 6.16E-10    | 29.40801505 |
| ZNF777       | NM_015694    | 117.9382254 | 1.321358047 | 1.44E-13    | 89.25531246 |
| ESYT2        | NM_020728    | 43.65251108 | 0.619317489 | 4.95E-05    | 70.48486733 |
| TMEM205      | NM_198536    | 47.57014489 | 5.513939708 | 0.00064112  | 8.62725155  |
| PMS2P3       | NR_028059    | 78.46847084 | 0.700752064 | 1.29E-09    | 111.9775094 |
| GMFB         | NM_004124    | 113.0193079 | 0.458521213 | 9.53E-17    | 246.4865414 |
| STAT5B       | NM_012448    | 71.69369417 | 0.37345961  | 4.33E-09    | 191.9717483 |
| MYL6         | NM_021019    | 152.2239396 | 30.51164619 | 3.57E-07    | 4.989043812 |
| DPY19L4      | NM_181787    | 236.1415735 | 0.234811748 | 2.91E-36    | 1005.66337  |
| PRPF8        | NM_006445    | 71.48777871 | 1.470317642 | 1.93E-07    | 48.62063588 |
| RUNDC1       | NM_173079    | 55.34620525 | 4.21305726  | 0.00012401  | 13.13682721 |
| EXOSC7       | NR_023353    | 92.75418513 | 2.733784893 | 2.95E-09    | 33.92885276 |
| ERI3         | NM_024066    | 103.3873883 | 2.199763414 | 6.63E-10    | 46.9993217  |
| SLC7A5P2     | NR_002594    | 273.5495533 | 29.59953495 | 6.08E-17    | 9.241684163 |
| USP14        | NM_005151    | 49.36679679 | 0.812313159 | 8.03E-06    | 60.77310975 |
| BRX1         | NM_018321    | 67.83526763 | 1.672264445 | 3.46E-08    | 40.56491653 |
| ARGLU1       | NM_018011    | 144.4478793 | 0.980123888 | 1.01E-18    | 147.3771644 |
| TRAM2-AS1    | NR_103447    | 126.5096539 | 2.00072065  | 4.55E-15    | 63.2320429  |
| SNRPD1       | NM_006938    | 118.2033481 | 4.98151063  | 2.01E-10    | 23.72841431 |
| PBX4         | NR_038198    | 61.06049096 | 2.870492689 | 1.16E-05    | 21.27178069 |
| WDFY3        | NM_014991    | 26.50965393 | 0.319214875 | 0.004844016 | 83.04642417 |
| SMIM8        | NM_001042493 | 183.9176338 | 0.762662083 | 5.48E-26    | 241.1521931 |
| PLEKHA3      | NM_019091    | 64.97812478 | 0.307041802 | 5.49E-10    | 211.6263141 |
| C5orf30      | NM_033211    | 189.8970423 | 2.218112376 | 8.61E-22    | 85.61200251 |
| ABRACL       | NM_021243    | 104.1827566 | 4.770309932 | 6.11E-10    | 21.8398297  |
| HIF1AN       | NM_017902    | 206.7747767 | 5.534297306 | 1.56E-20    | 37.36242656 |

|              |              |             |             |             |             |
|--------------|--------------|-------------|-------------|-------------|-------------|
| CLN8         | NM_018941    | 89.36679679 | 3.345623556 | 3.31E-08    | 26.71155176 |
| C17orf85     | NM_001114118 | 136.6718189 | 0.993957653 | 2.84E-16    | 137.5026577 |
| PKN2         | NM_006256    | 161.3256137 | 1.519121049 | 4.68E-16    | 106.1966812 |
| CCDC74B      | NM_207310    | 36.14157347 | 2.624315896 | 0.00285394  | 13.77180755 |
| MANBA        | NM_005908    | 172.4890624 | 0.914784744 | 1.08E-19    | 188.556995  |
| ZDHHC1       | NM_013304    | 76.14157347 | 2.712619519 | 5.38E-08    | 28.06938936 |
| LOC101928489 | NR_110889    | 61.59073644 | 7.908585873 | 0.000404354 | 7.787831785 |
| SELM         | NM_080430    | 198.2033481 | 15.55937233 | 1.22E-14    | 12.73851823 |
| SLC46A1      | NM_080669    | 149.6319195 | 6.817477228 | 2.28E-13    | 21.948283   |
| SEH1L        | NM_001013437 | 209.6319195 | 1.87400774  | 4.60E-24    | 111.8628888 |
| VPS41        | NM_014396    | 63.91763382 | 0.176779913 | 8.03E-08    | 361.566157  |
| PCSK5        | NM_001190482 | 158.9987163 | 0.340361898 | 7.25E-18    | 467.1460497 |
| PARD6G       | NM_032510    | 63.65251108 | 1.16508562  | 3.82E-07    | 54.63333338 |
| AP5Z1        | NM_014855    | 69.89704227 | 2.695239399 | 4.23E-07    | 25.93351904 |
| PGM2         | NM_018290    | 183.9176338 | 1.088710327 | 1.21E-22    | 168.9316517 |
| TIMMDC1      | NM_016589    | 121.5907364 | 2.242397935 | 1.20E-13    | 54.22353211 |
| LOC101926926 | NR_125388    | 26.77477667 | 0.461690877 | 0.002928124 | 57.9928649  |
| PPP6C        | NM_001123369 | 87.03989941 | 1.300917374 | 4.58E-09    | 66.90655465 |
| TRIP4        | NM_016213    | 141.3256137 | 0.791264744 | 5.54E-16    | 178.6072421 |
| IGF2BP2      | NM_001291869 | 114.550837  | 2.247361441 | 5.88E-11    | 50.97125675 |
| PRRC2C       | NM_015172    | 101.5907364 | 1.435466251 | 3.22E-10    | 70.77194353 |
| ADORA2B      | NM_000676    | 67.30502215 | 8.507567655 | 5.77E-05    | 7.911194466 |
| HSPA4        | NM_002154    | 133.2844306 | 3.262712478 | 1.47E-13    | 40.85080481 |
| C14orf132    | NM_001282463 | 109.3667968 | 1.510068077 | 2.08E-11    | 72.42507704 |
| H2AFX        | NM_002105    | 207.3050222 | 47.10205819 | 1.03E-07    | 4.401188189 |
| CYSTM1       | NM_032412    | 84.4478793  | 2.394925466 | 2.40E-08    | 35.26117221 |
| LOC100506314 | NR_038920    | 26.24453119 | 0.75531946  | 0.004125752 | 34.74626641 |
| CSTF2        | NM_001325    | 43.38738834 | 0.256829864 | 1.57E-06    | 168.9343588 |
| GINS2        | NM_016095    | 81.59073644 | 1.180226315 | 1.38E-10    | 69.13143301 |
| FGD6         | NM_018351    | 143.3873883 | 0.657358216 | 1.10E-16    | 218.126715  |
| PP7080       | NR_024158    | 152.2239396 | 9.78324371  | 2.41E-12    | 15.55965937 |
| CUL1         | NM_003592    | 109.1016741 | 1.869577179 | 1.05E-10    | 58.356336   |
| ATP6V1H      | NM_015941    | 73.54955335 | 0.743590338 | 1.69E-08    | 98.9113892  |
| FUBP1        | NM_003902    | 56.40669621 | 2.353614805 | 1.36E-05    | 23.96598461 |
| MLH3         | NM_001040108 | 67.57014489 | 1.508748813 | 5.19E-07    | 44.78554967 |
| ZNF468       | NR_102299    | 81.85585918 | 1.582335283 | 2.16E-09    | 51.73104591 |
| DEPTOR       | NM_001283012 | 71.69369417 | 0.765062249 | 5.19E-08    | 93.70962206 |
| FKBP4        | NM_002014    | 178.4684708 | 7.769310071 | 7.74E-16    | 22.97095485 |
| HSBP1L1      | NM_001136180 | 75.87645073 | 18.06215466 | 0.000570953 | 4.200852676 |
| RAB3GAP2     | NM_012414    | 89.89704227 | 1.125900443 | 6.51E-10    | 79.84457488 |
| RTCA-AS1     | NR_110435    | 115.0810825 | 17.99573484 | 6.04E-06    | 6.394908768 |
| SF3B3        | NM_012426    | 87.30502215 | 5.644823841 | 1.56E-07    | 15.4663856  |
| TOB2         | NM_016272    | 211.9588169 | 14.65899031 | 2.63E-16    | 14.45930534 |
| CCNL2        | NM_030937    | 123.9176338 | 5.143526076 | 2.22E-11    | 24.09196182 |
| ANKRD18DP    | NR_003291    | 87.03989941 | 1.23107757  | 7.22E-10    | 70.70220555 |
| LOC729732    | NR_047662    | 84.97812478 | 1.092862348 | 1.36E-09    | 77.75739087 |
| SLC37A3      | NM_001287498 | 106.5096539 | 1.063991822 | 2.89E-11    | 100.1038276 |
| CAMLG        | NM_001745    | 132.2239396 | 3.757054793 | 6.95E-14    | 35.19350846 |
| SDE2         | NM_152608    | 102.6512274 | 1.930527233 | 5.46E-12    | 53.17263889 |
| ALKBH3       | NM_139178    | 96.67181894 | 0.736032015 | 2.27E-11    | 131.341867  |
| LOC100093631 | NR_003580    | 54.81595977 | 2.770771302 | 4.25E-05    | 19.78364642 |
| UMPS         | NR_033434    | 151.222656  | 3.233193306 | 4.68E-16    | 46.77191918 |
| TEN1-CDK3    | NR_037709    | 70.69241049 | 6.341383381 | 2.56E-05    | 11.14779004 |
| NSMCE4A      | NM_001167865 | 168.3655131 | 5.133976128 | 2.90E-16    | 32.79437008 |
| CNNM3        | NM_017623    | 166.2445312 | 5.194176599 | 8.38E-16    | 32.00594512 |
| TRAF1        | NM_001190945 | 58.99871632 | 0.425650573 | 1.61E-08    | 138.6083329 |
| PSMD14       | NM_005805    | 134.8159598 | 0.793100238 | 8.15E-16    | 169.9860287 |
| SNRNP48      | NM_152551    | 150.4272878 | 1.206867947 | 2.51E-19    | 124.6427069 |
| RPL10A       | NM_007104    | 181.8558592 | 39.27451722 | 8.94E-08    | 4.630377967 |
| FTX          | NR_028379    | 100.5302455 | 0.710859575 | 5.08E-11    | 141.4206814 |
| DDX56        | NM_001257189 | 115.0810825 | 15.66797704 | 4.11E-07    | 7.344986669 |
| IFI30        | NM_006332    | 187.0398994 | 9.646592429 | 1.86E-16    | 19.38921964 |
| TOMM7        | NM_019059    | 86.24453119 | 2.587821601 | 5.51E-09    | 33.32707755 |
| PDP1         | NM_001161779 | 137.4079799 | 21.46485246 | 6.04E-08    | 6.401533863 |

|              |              |             |             |             |             |
|--------------|--------------|-------------|-------------|-------------|-------------|
| DAPK3        | NM_001348    | 118.4684708 | 3.888805963 | 3.82E-12    | 30.46397068 |
| CLN5         | NM_006493    | 180.5302455 | 7.103316091 | 3.19E-17    | 25.41492497 |
| DENND6B      | NM_001001794 | 37.40797988 | 0.749788944 | 0.000413933 | 49.89134636 |
| TRAK2        | NM_015049    | 98.2033481  | 0.291044243 | 3.99E-13    | 337.4172504 |
| LOC100507002 | NR_110801    | 62.12098192 | 2.849636975 | 5.47E-06    | 21.79961253 |
| TPR          | NM_003292    | 130.4272878 | 0.901328693 | 9.90E-15    | 144.7055761 |
| PRRG4        | NM_024081    | 129.6319195 | 0.91353337  | 4.27E-16    | 141.9016796 |
| MRPS7        | NM_015971    | 133.5495533 | 5.650663353 | 4.37E-13    | 23.63431424 |
| ZBTB47       | NM_145166    | 40.53024548 | 3.598835218 | 0.00341678  | 11.26204536 |
| LOC100129973 | NR_102751    | 58.2033481  | 1.001876645 | 3.60E-06    | 58.09432567 |
| AATF         | NM_012138    | 107.3050222 | 1.215535475 | 5.75E-11    | 88.27798477 |
| CYTH2        | NM_004228    | 69.10167405 | 12.20444445 | 0.00051687  | 5.662008976 |
| KNTC1        | NM_014708    | 93.01930787 | 1.444617012 | 2.46E-09    | 64.39028968 |
| YTHDF3-AS1   | NR_102684    | 169.6319195 | 30.33465399 | 1.94E-05    | 5.592017618 |
| POLB         | NM_002690    | 135.8764507 | 0.977453938 | 9.77E-17    | 139.0105922 |
| C9orf163     | NM_152571    | 106.5096539 | 23.75412618 | 7.91E-05    | 4.483838013 |
| DTX3L        | NM_138287    | 76.93694168 | 3.605055586 | 1.82E-07    | 21.34140233 |
| WDR37        | NM_014023    | 62.85714286 | 0.016710884 | 2.31E-11    | 3761.449315 |
| ECHDC2       | NM_001198962 | 97.93822536 | 0.273542806 | 6.77E-14    | 358.0361946 |
| ZNF780B      | NM_001005851 | 64.4478793  | 0.630612468 | 1.03E-07    | 102.1988662 |
| RNF149       | NM_173647    | 138.7335936 | 1.931578323 | 1.24E-15    | 71.82395449 |
| GXYLT1       | NM_173601    | 160.5302455 | 0.092123892 | 2.16E-26    | 1742.547373 |
| C7orf73      | NM_001130929 | 213.0193079 | 2.621459086 | 4.89E-25    | 81.25982549 |
| PYROXD1      | NM_024854    | 100         | 0.832383562 | 8.06E-12    | 120.1369231 |
| CKAP2L       | NM_152515    | 50.16216501 | 1.219633263 | 2.53E-05    | 41.12889221 |
| FANCE        | NM_021922    | 118.2033481 | 3.228599474 | 3.53E-12    | 36.61133846 |
| SHCBP1       | NM_024745    | 95.34620525 | 0.249542056 | 4.01E-14    | 382.0847141 |
| TTF2         | NM_003594    | 58.46847084 | 2.140691842 | 1.62E-05    | 27.31288534 |
| ELMSAN1      | NM_001043318 | 49.10167405 | 4.165107451 | 0.000963748 | 11.78881328 |
| LINC00476    | NR_023389    | 132.7541851 | 15.03868213 | 1.04E-08    | 8.827514536 |
| ZNF184       | NM_007149    | 69.63191953 | 1.433746365 | 1.86E-07    | 48.566414   |
| A3GALT2      | NM_001080438 | 32.75418513 | 0.631955244 | 0.000238767 | 51.8299127  |
| MAML3        | NM_018717    | 47.83526763 | 0.389643706 | 1.89E-05    | 122.7666889 |
| PELI1        | NM_020651    | 115.3462052 | 1.58391799  | 4.42E-12    | 72.82334437 |
| RAB6B        | NM_016577    | 123.6525111 | 1.175161542 | 4.51E-13    | 105.2217135 |
| CDC37        | NM_007065    | 139.2638391 | 4.59361914  | 8.71E-14    | 30.31680137 |
| ANKRD34A     | NM_001039888 | 129.8970423 | 0.611587502 | 1.74E-18    | 212.3932255 |
| PDIA3        | NM_005313    | 202.1209819 | 2.641274728 | 2.51E-22    | 76.52402825 |
| SAP30L       | NM_001131063 | 72.22393965 | 3.249114926 | 1.36E-06    | 22.22880424 |
| TMEM242      | NM_018452    | 54.07979883 | 4.14401317  | 0.000232603 | 13.05010303 |
| C6orf106     | NM_022758    | 41.3256137  | 1.779204891 | 0.001249587 | 23.2270122  |
| VPS9D1-AS1   | NR_036480    | 228.3655131 | 18.34036037 | 3.15E-17    | 12.45152813 |
| FBXO5        | NM_012177    | 68.36551311 | 2.802837158 | 1.59E-06    | 24.39153945 |
| ZNF503       | NR_120651    | 92.75418513 | 3.456104321 | 1.21E-08    | 26.83778512 |
| NUP98        | NM_005387    | 69.63191953 | 2.85004504  | 1.90E-06    | 24.43186636 |
| PREB         | NM_013388    | 132.7541851 | 5.43554617  | 1.94E-12    | 24.4233387  |
| FAM133DP     | NR_034169    | 189.6319195 | 1.21222051  | 7.61E-24    | 156.4335184 |
| TIMM10B      | NM_012192    | 118.7335936 | 2.937602386 | 2.84E-13    | 40.41853797 |
| IRF9         | NM_006084    | 62.12098192 | 7.223972116 | 0.00015782  | 8.599283182 |
| N4BP2        | NM_018177    | 115.3462052 | 0.29810274  | 5.21E-15    | 386.9344009 |
| MFAP1        | NM_005926    | 116.1415735 | 2.373245816 | 3.53E-12    | 48.93786084 |
| CLPP         | NM_006012    | 50.42728775 | 8.575313725 | 0.003293699 | 5.880518121 |
| MTM1         | NM_000252    | 75.08108251 | 0.422729407 | 4.72E-09    | 177.6102662 |
| CCT6P3       | NR_033416    | 151.6936942 | 2.925986881 | 5.41E-15    | 51.84360024 |
| NUDC         | NM_006600    | 112.4890624 | 5.693888623 | 2.23E-09    | 19.75610516 |
| SLC9A1       | NM_003047    | 241.8558592 | 2.354733818 | 1.47E-26    | 102.7104879 |
| LOC102723373 | NR_119378    | 46.77477667 | 0.127139667 | 5.31E-07    | 367.9007318 |
| C3orf38      | NM_173824    | 127.3050222 | 5.761126982 | 6.84E-12    | 22.09724288 |
| MSX1         | NM_002448    | 146.5096539 | 14.59627692 | 3.93E-10    | 10.03746741 |
| BUD13        | NM_032725    | 103.9176338 | 1.481265403 | 8.42E-12    | 70.1546351  |
| ME1          | NM_002395    | 71.95881691 | 0.119567006 | 3.29E-09    | 601.8283755 |
| C15orf61     | NM_001143936 | 207.8352676 | 7.963661544 | 1.24E-19    | 26.09795337 |
| IFI6         | NM_002038    | 89.89704227 | 4.169978498 | 1.24E-08    | 21.55815487 |
| NHP2L1       | NM_001003796 | 153.0193079 | 6.058124903 | 1.21E-14    | 25.25852641 |



|           |              |             |             |             |             |
|-----------|--------------|-------------|-------------|-------------|-------------|
| PRPF19    | NM_014502    | 125.2432475 | 3.037688084 | 3.11E-13    | 41.22979189 |
| C5orf24   | NM_001135586 | 223.9176338 | 3.562062204 | 4.05E-25    | 62.86179774 |
| CCNF      | NM_001761    | 95.61132799 | 7.391658504 | 1.97E-07    | 12.93503047 |
| ALDH1A3   | NM_001293815 | 121.3256137 | 6.985826772 | 6.96E-10    | 17.36739511 |
| THAP7     | NM_030573    | 158.4684708 | 37.00352562 | 2.19E-06    | 4.282523575 |
| PCYOX1    | NM_016297    | 200.7953682 | 2.907034356 | 4.81E-22    | 69.07223776 |
| GCHFR     | NM_005258    | 43.1222656  | 2.631738862 | 0.000291394 | 16.38546522 |
| SRBD1     | NM_018079    | 95.87645073 | 0.213724046 | 6.60E-12    | 448.5992689 |
| RSL1D1    | NM_015659    | 107.0398994 | 5.818133726 | 4.74E-09    | 18.39763478 |
| GHDC      | NM_032484    | 45.773493   | 2.180199854 | 0.000165225 | 20.99509038 |
| YIPF2     | NM_024029    | 54.55083703 | 5.436705804 | 0.000292545 | 10.03380337 |
| BCAM      | NM_001013257 | 135.3462052 | 7.632489195 | 1.78E-11    | 17.73290493 |
| TNFRSF1A  | NM_001065    | 91.95881691 | 17.80534987 | 6.50E-05    | 5.164673404 |
| KCNN4     | NM_002250    | 68.83655131 | 5.863790512 | 2.89E-05    | 11.73925828 |
| FAM73B    | NM_032809    | 26.24453119 | 0.779869709 | 0.003332421 | 33.65245616 |
| PSEN2     | NM_000447    | 132.7541851 | 2.893804084 | 3.12E-13    | 45.87531888 |
| SCAF8     | NM_014892    | 80.79536822 | 1.984525891 | 1.13E-07    | 40.71268034 |
| PRR19     | NM_199285    | 112.2239396 | 5.752601424 | 1.55E-10    | 19.50838088 |
| C19orf66  | NM_018381    | 81.85585918 | 5.475134317 | 2.12E-07    | 14.95047508 |
| TMEM45A   | NM_018004    | 47.57014489 | 0.593236959 | 8.90E-06    | 80.18742629 |
| IL12A     | NM_000882    | 75.87645073 | 1.132443492 | 2.04E-09    | 67.0024167  |
| SLC4A1AP  | NM_018158    | 165.9794085 | 2.090759224 | 7.42E-19    | 79.38714633 |
| PAPSS2    | NM_001015880 | 66.77477667 | 0.596540743 | 7.65E-08    | 111.9366572 |
| PCF11     | NM_015885    | 116.4066962 | 4.284182144 | 5.73E-11    | 27.17127617 |
| GSTCD     | NM_024751    | 120.5302455 | 0.062460873 | 1.40E-18    | 1929.691967 |
| KBTBD7    | NM_032138    | 87.30502215 | 4.785054525 | 4.65E-08    | 18.24535576 |
| C1QL4     | NM_001008223 | 104.1827566 | 4.454937782 | 4.84E-10    | 23.38590608 |
| ASS1      | NM_000050    | 40.26512274 | 1.10916049  | 0.000106905 | 36.30234136 |
| ZDHHC5    | NM_015457    | 147.0398994 | 2.260103149 | 4.77E-16    | 65.05893303 |
| SMG9      | NM_019108    | 129.3667968 | 4.367157826 | 2.03E-12    | 29.62265207 |
| LCOR      | NM_032440    | 32.22393965 | 1.181461427 | 0.001279722 | 27.27464386 |
| JUP       | NM_021991    | 193.2844306 | 3.840210852 | 1.02E-19    | 50.33172346 |
| DDX60L    | NM_001012967 | 67.03989941 | 1.542730137 | 3.27E-06    | 43.45536385 |
| SNX8      | NM_013321    | 77.40797988 | 0.611287258 | 1.43E-09    | 126.6311032 |
| SDHA      | NM_001294332 | 78.2033481  | 2.442754507 | 1.09E-07    | 32.01441156 |
| RPL23     | NM_000978    | 154.8159598 | 10.94022581 | 6.13E-12    | 14.15107534 |
| CCDC88A   | NM_001254943 | 108.8365513 | 0.098419013 | 6.65E-16    | 1105.848837 |
| PEX12     | NM_000286    | 106.7747767 | 15.93847036 | 1.67E-06    | 6.699185947 |
| BNIP3L    | NM_004331    | 75.87645073 | 0.599192281 | 2.89E-09    | 126.631222  |
| MPLKIP    | NM_138701    | 155.611328  | 7.70161242  | 7.10E-13    | 20.20503233 |
| MYO5B     | NM_001080467 | 81.59073644 | 0.369756563 | 2.82E-09    | 220.6606846 |
| TBCE      | NM_001287801 | 138.2033481 | 1.09356349  | 1.10E-14    | 126.3788974 |
| RIC1      | NM_001206557 | 204.1827566 | 0.890340421 | 2.94E-23    | 229.3311095 |
| PIGZ      | NM_025163    | 114.8159598 | 2.444325976 | 1.19E-12    | 46.97244184 |
| BDP1      | NM_018429    | 121.8558592 | 0.877379014 | 3.56E-14    | 138.886225  |
| GLOD4     | NM_016080    | 127.3050222 | 2.118042837 | 1.10E-14    | 60.10502713 |
| GADD45A   | NM_001924    | 163.3873883 | 26.0993615  | 6.25E-09    | 6.260206339 |
| RND1      | NM_014470    | 124.1827566 | 2.329082344 | 1.13E-13    | 53.31831951 |
| UBE2V2    | NM_003350    | 117.9382254 | 1.712915028 | 2.72E-12    | 68.85235019 |
| EPB41L5   | NM_001184937 | 105.2432475 | 0.365468703 | 1.10E-12    | 287.96788   |
| PPIL3     | NM_130906    | 97.67310262 | 0.416624303 | 6.77E-14    | 234.4392826 |
| RAPGEF5   | NM_012294    | 31.69369417 | 0.636149412 | 0.001275714 | 49.82114827 |
| NOMO1     | NM_014287    | 138.7335936 | 2.376675884 | 2.43E-14    | 58.37295464 |
| WDR89     | NM_080666    | 121.5907364 | 1.439758008 | 1.83E-13    | 84.45220362 |
| STK11IP   | NM_052902    | 44.71300204 | 2.614522231 | 0.000176498 | 17.1017869  |
| PRKG1-AS1 | NR_038277    | 47.30502215 | 1.109945432 | 2.75E-05    | 42.61923225 |
| EXOG      | NM_001145464 | 118.2033481 | 1.088124318 | 6.05E-14    | 108.6303708 |
| DNAJA1    | NM_001539    | 198.7335936 | 6.648308844 | 4.18E-19    | 29.89235281 |
| ARPC3     | NM_001287222 | 75.61132799 | 4.410042199 | 1.08E-06    | 17.14526178 |
| RNF144B   | NM_182757    | 100.7953682 | 0.244293224 | 1.02E-13    | 412.5999352 |
| BLOC1S6   | NM_012388    | 177.9382254 | 2.220629638 | 6.49E-20    | 80.12962736 |
| ZC3H15    | NM_018471    | 75.34620525 | 3.084943881 | 1.56E-07    | 24.42384956 |
| TM7SF3    | NM_016551    | 145.9794085 | 1.390167714 | 1.67E-16    | 105.0084871 |
| LLPH      | NM_032338    | 109.8970423 | 9.429813812 | 2.86E-08    | 11.65421126 |

|                |              |             |             |             |             |
|----------------|--------------|-------------|-------------|-------------|-------------|
| XRCC1          | NM_006297    | 67.03989941 | 0.132998237 | 1.14E-10    | 504.0660757 |
| RAPH1          | NM_203365    | 72.48906239 | 0.371074659 | 6.74E-09    | 195.3489969 |
| MRPL16         | NM_017840    | 130.9575332 | 12.68164889 | 8.43E-10    | 10.32653832 |
| KLHL23         | NM_144711    | 100.5302455 | 0.140164678 | 3.13E-16    | 717.2295265 |
| HYOU1          | NM_006389    | 115.0810825 | 4.405457666 | 1.16E-10    | 26.12238983 |
| LOC100506746   | NR_038841    | 38.73359358 | 1.938953826 | 0.000339663 | 19.97654254 |
| TFB1M          | NM_016020    | 138.2033481 | 1.11141224  | 3.22E-15    | 124.3493126 |
| CIR1           | NM_004882    | 44.4478793  | 0.021463829 | 3.78E-08    | 2070.82715  |
| NUP133         | NM_018230    | 135.3462052 | 1.386069595 | 2.78E-14    | 97.64748159 |
| C5orf22        | NM_018356    | 123.6525111 | 1.690492468 | 2.20E-14    | 73.14585153 |
| CLOCK          | NM_004898    | 131.9588169 | 2.061544341 | 5.72E-13    | 64.00969133 |
| RBM12B         | NM_203390    | 167.3050222 | 7.891631895 | 5.34E-15    | 21.20030741 |
| TNFSF9         | NM_003811    | 193.8146761 | 10.40736296 | 6.36E-17    | 18.622842   |
| FAM207A        | NM_058190    | 79.26383906 | 1.401879027 | 1.85E-08    | 56.54114053 |
| ACSL3          | NM_004457    | 149.8970423 | 0.834383319 | 1.41E-16    | 179.6500947 |
| BAG4           | NM_001204878 | 98.99871632 | 3.030624155 | 3.81E-10    | 32.66611472 |
| KPNA1          | NM_002264    | 161.5907364 | 0.917873673 | 6.82E-18    | 176.0489937 |
| AZIN2          | NM_052998    | 95.08108251 | 1.338917044 | 3.39E-10    | 71.01342306 |
| TBC1D25        | NM_002536    | 94.55083703 | 0.984413099 | 2.03E-11    | 96.04792652 |
| HMOX1          | NM_002133    | 118.4684708 | 2.0263454   | 2.84E-13    | 58.4641053  |
| APOPT1         | NM_032374    | 58.73359358 | 0.670437584 | 8.28E-07    | 87.60486436 |
| MMD            | NM_012329    | 173.5495533 | 0.522591634 | 1.39E-24    | 332.094014  |
| MIB1           | NM_020774    | 32.22393965 | 0.199933198 | 0.000651647 | 161.1735316 |
| C2orf44        | NM_025203    | 141.3256137 | 1.892754767 | 7.64E-16    | 74.66662675 |
| WIPF2          | NM_133264    | 84.97812478 | 1.288175805 | 9.36E-09    | 65.96780071 |
| HPS6           | NM_024747    | 147.5701449 | 9.900794846 | 9.18E-12    | 14.90487857 |
| MYL9           | NM_006097    | 106.2445312 | 3.697292965 | 1.52E-10    | 28.73576214 |
| C9orf142       | NM_183241    | 120.7953682 | 13.97255986 | 3.65E-07    | 8.645185237 |
| SAT1           | NM_002970    | 94.55083703 | 14.25411101 | 1.06E-05    | 6.633232825 |
| FAM206A        | NM_017832    | 71.95881691 | 5.210671767 | 3.73E-06    | 13.80989249 |
| ATP5H          | NM_006356    | 176.1415735 | 10.16178272 | 4.72E-15    | 17.33372759 |
| FAM118B        | NM_024556    | 167.8352676 | 2.591170137 | 9.41E-18    | 64.77199826 |
| DUSP12         | NM_007240    | 162.6512274 | 3.849120103 | 1.11E-17    | 42.2567296  |
| SCRIB          | NM_015356    | 40.79536822 | 1.712643608 | 0.000679953 | 23.8201153  |
| CDKAL1         | NM_017774    | 63.91763382 | 0.095496546 | 2.40E-07    | 669.3188038 |
| LOC101929567   | NR_110257    | 100.7953682 | 0.721705122 | 1.05E-12    | 139.6628141 |
| FAM72D         | NM_207418    | 42.38610466 | 3.66879111  | 0.001991629 | 11.5531529  |
| UBTD2          | NM_152277    | 140.2651227 | 0.980140944 | 2.18E-15    | 143.1070946 |
| RANBP9         | NM_005493    | 49.10167405 | 1.243063259 | 0.000146591 | 39.50054329 |
| MYO1E          | NM_004998    | 155.8764507 | 1.607659425 | 2.43E-15    | 96.95862714 |
| HABP4          | NM_014282    | 135.0810825 | 1.855882856 | 1.37E-14    | 72.7853496  |
| FAM195A        | NM_138418    | 71.42857143 | 11.26446697 | 0.000164031 | 6.341052057 |
| BLOC1S5-TXNDC5 | NR_037616    | 80.53024548 | 0.612188222 | 4.61E-09    | 131.5449115 |
| COPG1          | NM_016128    | 123.9176338 | 2.868736233 | 4.40E-12    | 43.19589664 |
| NCAPH2         | NM_014551    | 86.24453119 | 1.311940288 | 8.64E-11    | 65.73815287 |
| SIMC1          | NM_198567    | 83.91763382 | 0.37664729  | 2.89E-10    | 222.8016399 |
| SIX1           | NM_005982    | 49.63191953 | 5.489244946 | 0.000909672 | 9.041666025 |
| PLEKHN1        | NM_001160184 | 116.4066962 | 6.766248403 | 3.33E-10    | 17.20402345 |
| UBE2O          | NM_022066    | 152.7541851 | 2.423813919 | 1.43E-15    | 63.02224109 |
| COL4A3BP       | NM_001130105 | 29.89704227 | 0.850915697 | 0.00248492  | 35.13514014 |
| FAM117B        | NM_173511    | 103.3873883 | 0.271796845 | 4.29E-13    | 380.3847987 |
| TMED2          | NM_006815    | 151.9588169 | 2.883331478 | 3.87E-17    | 52.70251376 |
| SRGAP3         | NM_014850    | 93.01930787 | 0.015955903 | 1.12E-15    | 5829.773989 |
| LOC100506023   | NR_037845    | 94.81595977 | 0.280728653 | 3.84E-11    | 337.7494912 |
| TPIIIP2        | NR_002187    | 140.7953682 | 8.02043486  | 3.57E-11    | 17.55458035 |
| SLC35A5        | NM_017945    | 83.91763382 | 2.904121226 | 1.32E-08    | 28.89605057 |
| PKP2           | NM_004572    | 154.550837  | 0.075130781 | 1.15E-24    | 2057.09079  |
| MLXIP          | NM_014938    | 120.7953682 | 0.731567903 | 4.96E-14    | 165.1184637 |
| CERS5          | NM_147190    | 49.10167405 | 1.55464814  | 1.00E-04    | 31.58378593 |
| TMEM14A        | NM_014051    | 168.1003904 | 1.306992697 | 1.83E-21    | 128.6161666 |
| LOC101927415   | NR_110049    | 44.97812478 | 6.799810218 | 0.004745339 | 6.614614722 |
| PLCG1          | NM_002660    | 80.53024548 | 3.383777077 | 7.61E-08    | 23.79892163 |
| DDX11-AS1      | NR_038927    | 89.36679679 | 1.265724717 | 3.05E-09    | 70.60523953 |
| EDEM3          | NM_025191    | 134.550837  | 0.969316956 | 6.09E-15    | 138.8099489 |

|              |              |             |             |             |             |
|--------------|--------------|-------------|-------------|-------------|-------------|
| CYP2R1       | NM_024514    | 120.5302455 | 5.813940683 | 7.63E-11    | 20.73124788 |
| CFDP1        | NM_006324    | 121.060491  | 1.417529312 | 6.67E-12    | 85.40246042 |
| DHRS7B       | NM_015510    | 116.4066962 | 0.966330377 | 8.91E-13    | 120.4626275 |
| NUDT19       | NM_001105570 | 99.5289618  | 3.537381806 | 1.71E-09    | 28.13633565 |
| MCCC2        | NM_022132    | 148.8365513 | 0.825095864 | 7.24E-17    | 180.3869801 |
| MOSPD2       | NM_152581    | 34.81595977 | 0.685057571 | 0.000341049 | 50.82194732 |
| CD9          | NM_001769    | 109.3667968 | 4.211998087 | 7.70E-10    | 25.9655381  |
| FAM168B      | NM_001009993 | 155.0810825 | 2.724423462 | 3.26E-16    | 56.9225323  |
| PAPD5        | NM_001040284 | 177.9382254 | 0.611075817 | 1.50E-22    | 291.188459  |
| GNAI1        | NM_002069    | 140.7953682 | 2.404295748 | 5.02E-14    | 58.55992066 |
| PSMB4        | NM_002796    | 90.42728775 | 10.09044147 | 4.71E-06    | 8.961678045 |
| GALK1        | NM_000154    | 136.9369417 | 11.80359095 | 1.64E-10    | 11.60129509 |
| OTULIN       | NM_138348    | 154.550837  | 0.754048636 | 9.33E-20    | 204.961364  |
| MTERF2       | NM_001033050 | 135.8764507 | 5.092844203 | 1.09E-13    | 26.67987579 |
| USH1C        | NM_153676    | 137.6731026 | 2.954690144 | 5.03E-14    | 46.59476828 |
| MED10        | NM_032286    | 75.34620525 | 2.9063367   | 6.55E-08    | 25.9248026  |
| PIPF         | NM_005729    | 103.9176338 | 3.895574629 | 3.18E-10    | 26.67581646 |
| RIPK4        | NM_020639    | 160.5302455 | 2.797394845 | 1.33E-16    | 57.38562283 |
| ACVR1        | NM_001111067 | 29.36679679 | 1.256481117 | 0.002619399 | 23.37225478 |
| NEIL3        | NM_018248    | 123.6525111 | 0.736559338 | 2.47E-14    | 167.8785466 |
| RBM26-AS1    | NR_038991    | 81.85585918 | 1.67467897  | 2.16E-09    | 48.8785377  |
| RAVER1       | NM_133452    | 81.06049096 | 4.981076524 | 3.57E-07    | 16.27368915 |
| PHGDH        | NM_006623    | 38.46847084 | 2.24389857  | 0.001841839 | 17.14358722 |
| DVL3         | NM_004423    | 29.10167405 | 0.698467324 | 0.000823879 | 41.66504722 |
| TBC1D8B      | NM_198881    | 63.38738834 | 0.01500155  | 2.31E-11    | 4225.389226 |
| 5-Mar        | NM_017824    | 110.6924105 | 1.639326797 | 1.65E-11    | 67.52308977 |
| INPP5B       | NM_001297434 | 97.93822536 | 0.314364067 | 3.99E-13    | 311.5439574 |
| MAD2L1       | NM_002358    | 76.14157347 | 2.909050106 | 4.12E-08    | 26.174033   |
| TOP2A        | NM_001067    | 98.73359358 | 0.947542103 | 8.06E-12    | 104.1996902 |
| SYDE2        | NM_032184    | 38.2033481  | 1.679589933 | 0.001841839 | 22.74564009 |
| FAM212B-AS1  | NR_038952    | 36.67181894 | 1.473069857 | 0.000413933 | 24.89482679 |
| CMC2         | NM_020188    | 178.4684708 | 0.873820143 | 4.88E-23    | 204.2393647 |
| LOC389906    | NR_034031    | 120.2651227 | 3.967263081 | 1.88E-11    | 30.31438054 |
| THAP9        | NM_024672    | 104.713002  | 3.32002374  | 2.41E-10    | 31.53983532 |
| DERL2        | NM_016041    | 63.65251108 | 1.242795217 | 1.62E-07    | 51.21721601 |
| NDFIP1       | NM_030571    | 150.162165  | 0.449638248 | 4.33E-20    | 333.9621699 |
| TRIM24       | NM_003852    | 135.0810825 | 0.411377867 | 1.09E-16    | 328.3625428 |
| AAAS         | NM_001173466 | 115.3462052 | 2.955726214 | 4.84E-12    | 39.0246582  |
| P4HTM        | NM_177938    | 89.63191953 | 10.26133813 | 2.67E-06    | 8.734915311 |
| LOC100506022 | NR_104622    | 61.3256137  | 9.153074594 | 0.000877542 | 6.700001521 |
| VPS37A       | NM_152415    | 149.8970423 | 1.700444751 | 4.01E-16    | 88.15166868 |
| MCIDAS       | NM_001190787 | 78.73359358 | 6.480586065 | 7.97E-07    | 12.14914713 |
| C2orf15      | NM_144706    | 43.91763382 | 2.935776569 | 0.001166714 | 14.95946057 |
| PIGF         | NM_002643    | 95.34620525 | 2.391021604 | 1.05E-09    | 39.87676444 |
| DHX9         | NM_001357    | 141.060491  | 2.618010993 | 1.59E-14    | 53.88078635 |
| DPAGT1       | NM_001382    | 55.08108251 | 9.806869422 | 0.001628033 | 5.616581616 |
| AP2B1        | NM_001282    | 101.060491  | 0.611740403 | 1.31E-11    | 165.2015961 |
| KLHL42       | NM_020782    | 72.75418513 | 0.256418095 | 3.80E-11    | 283.7326483 |
| SPINT2       | NM_001166103 | 138.4684708 | 4.083713186 | 2.90E-13    | 33.90749167 |
| MRPL13       | NM_014078    | 244.1827566 | 0.980104762 | 1.90E-30    | 249.1394451 |
| NCAPD2       | NM_014865    | 61.59073644 | 3.155195417 | 4.84E-06    | 19.52041896 |
| TIAL1        | NM_001033925 | 196.4066962 | 2.591287879 | 5.79E-22    | 75.79501211 |
| METTL3       | NM_019852    | 133.2844306 | 5.880593039 | 1.43E-12    | 22.66513423 |
| EPHB4        | NM_004444    | 54.81595977 | 2.081545061 | 2.01E-05    | 26.33426524 |
| APC          | NM_001127511 | 126.7747767 | 0.757750305 | 1.98E-14    | 167.3041578 |
| FAU          | NM_001997    | 92.75418513 | 19.87360678 | 0.00035245  | 4.667204407 |
| CETN4P       | NR_024041    | 47.30502215 | 2.183393309 | 5.57E-05    | 21.6658272  |
| RAB14        | NM_016322    | 35.61132799 | 2.119918482 | 0.003131679 | 16.79844215 |
| CTCF         | NM_001191022 | 43.91763382 | 1.677973759 | 0.000590202 | 26.17301586 |
| KDM5B        | NM_006618    | 84.71300204 | 0.872564303 | 4.58E-10    | 97.08511075 |
| CTSO         | NM_001334    | 72.48906239 | 1.173054968 | 9.73E-08    | 61.79511137 |
| ICAM5        | NM_003259    | 92.75418513 | 17.21609502 | 3.64E-05    | 5.387643658 |
| ABT1         | NM_013375    | 60.05920728 | 6.238563753 | 0.000111218 | 9.627088807 |
| TP53BP2      | NM_001031685 | 60.79536822 | 1.134636393 | 6.76E-06    | 53.58136632 |

|                        |              |             |             |             |             |
|------------------------|--------------|-------------|-------------|-------------|-------------|
| WHAMMP2                | NR_026589    | 78.46847084 | 1.338133268 | 9.34E-09    | 58.64025111 |
| SNED1                  | NM_001080437 | 34.55083703 | 0.437254593 | 0.000397555 | 79.01766513 |
| IPMK                   | NM_152230    | 78.73359358 | 0.60089788  | 9.54E-10    | 131.0265791 |
| C9orf40                | NM_017998    | 124.1827566 | 7.374392156 | 1.62E-10    | 16.83972779 |
| TMEM54                 | NM_033504    | 58.2033481  | 1.844219306 | 5.52E-06    | 31.55988439 |
| CDCP1                  | NM_022842    | 156.4066962 | 4.114602678 | 1.58E-14    | 38.01258796 |
| SAAL1                  | NM_138421    | 90.42728775 | 2.640609861 | 1.39E-09    | 34.24484968 |
| HSD17B12               | NM_016142    | 101.3256137 | 0.465842441 | 1.21E-11    | 217.5104817 |
| TM9SF3                 | NM_020123    | 123.3873883 | 1.298473783 | 5.38E-13    | 95.02493616 |
| PIH1D1                 | NM_017916    | 68.10039037 | 7.536769809 | 4.57E-05    | 9.035752995 |
| MBOAT2                 | NM_138799    | 48.57142857 | 0.124756946 | 2.30E-06    | 389.3284498 |
| RYK                    | NM_002958    | 46.77477667 | 0.524468425 | 1.93E-05    | 89.18511478 |
| NICN1                  | NM_032316    | 67.03989941 | 10.64681674 | 0.00054945  | 6.296708308 |
| RAB1B                  | NM_030981    | 55.61132799 | 5.971048147 | 0.00048885  | 9.313495154 |
| HARBI1                 | NM_173811    | 101.3256137 | 2.900398422 | 2.98E-10    | 34.93506717 |
| STAG3L5P-PVRIG2P-PILRB | NR_036569    | 203.1222656 | 8.415348618 | 2.32E-17    | 24.13711836 |
| DDX58                  | NM_014314    | 61.85585918 | 1.103293766 | 2.86E-07    | 56.06472284 |
| UBE2Z                  | NM_023079    | 200.7953682 | 10.21034558 | 1.47E-16    | 19.66587385 |
| PKN3                   | NM_013355    | 77.20206442 | 6.285250468 | 5.34E-06    | 12.28305297 |
| DDX5                   | NM_004396    | 178.4684708 | 12.26309898 | 6.20E-14    | 14.55329286 |
| BMS1                   | NM_014753    | 197.9382254 | 1.589465851 | 3.12E-22    | 124.5312853 |
| COQ6                   | NM_182476    | 152.7541851 | 4.232829879 | 2.48E-15    | 36.08795758 |
| STAG3L1                | NR_040583    | 315.8764507 | 14.42563981 | 8.10E-28    | 21.89687631 |
| ABHD17B                | NM_001025780 | 136.6718189 | 0.541899943 | 2.37E-17    | 252.208587  |
| RBM14-RBM4             | NM_001198846 | 187.3050222 | 8.556292589 | 5.97E-16    | 21.89090897 |
| ZNF500                 | NM_021646    | 98.2033481  | 3.126747241 | 1.31E-09    | 31.40751092 |
| PRPF31                 | NM_015629    | 75.34620525 | 3.049882409 | 6.57E-07    | 24.70462632 |
| HEATR5A                | NM_015473    | 191.9588169 | 0.219768645 | 1.37E-26    | 873.4586176 |
| HNRNPM                 | NM_005968    | 102.3861047 | 3.509819644 | 2.97E-09    | 29.17132932 |
| PIGW                   | NM_178517    | 132.2239396 | 8.066292811 | 4.86E-11    | 16.39215718 |
| LRRCC1                 | NM_033402    | 113.5495533 | 0.1192187   | 8.18E-19    | 952.4475059 |
| TBC1D32                | NR_104452    | 87.57014489 | 0.447314222 | 4.91E-10    | 195.7687474 |
| ERLIN1                 | NM_001100626 | 154.6100443 | 0.825658014 | 1.93E-19    | 187.2567598 |
| PROSER3                | NM_001039887 | 75.34620525 | 2.549351169 | 1.89E-07    | 29.55505157 |
| TAF13                  | NM_005645    | 124.1827566 | 2.658876261 | 9.10E-14    | 46.70497774 |
| ITGB1BP1               | NM_022334    | 123.1222656 | 5.089464999 | 4.72E-11    | 24.19159295 |
| CNTNAP3                | NM_033655    | 29.10167405 | 0.667309431 | 0.002554847 | 43.61046422 |
| ABHD5                  | NM_016006    | 189.3667968 | 0.9146125   | 1.63E-24    | 207.0459312 |
| FBXL12                 | NM_017703    | 203.9176338 | 0.750717349 | 9.52E-30    | 271.6303735 |
| TTC7A                  | NM_001288953 | 98.99871632 | 3.110715537 | 1.82E-09    | 31.82506248 |
| ARHGAP42               | NM_152432    | 55.34620525 | 0.715865429 | 5.01E-06    | 77.31370028 |
| TICAM1                 | NM_182919    | 91.22265597 | 4.309034411 | 1.25E-08    | 21.17009225 |
| CYR61                  | NM_001554    | 195.3462052 | 7.348673045 | 3.98E-18    | 26.58251416 |
| SUPV3L1                | NM_003171    | 66.50965393 | 1.485339963 | 7.03E-07    | 44.77739479 |
| PRPF40B                | NM_001031698 | 37.40797988 | 2.186455029 | 0.001495598 | 17.10896377 |
| MNX1-AS1               | NR_038835    | 141.5907364 | 10.41706455 | 4.00E-11    | 13.59219153 |
| POLR3A                 | NM_007055    | 58.73359358 | 2.390501258 | 1.02E-05    | 24.56957234 |
| BMS1P4                 | NR_026592    | 217.6731026 | 1.768682465 | 2.90E-26    | 123.0707642 |
| SAP18                  | NM_005870    | 122.6512274 | 5.837177596 | 4.02E-11    | 21.01207739 |
| ELK3                   | NM_005230    | 37.14285714 | 2.603554869 | 0.002358832 | 14.26620871 |
| TMEM80                 | NM_174940    | 75.08108251 | 10.62844628 | 0.000109907 | 7.064163524 |
| VTI1B                  | NM_006370    | 63.91763382 | 3.907378348 | 2.52E-05    | 16.35818908 |
| MRPL1                  | NM_020236    | 84.97812478 | 0.346758023 | 5.73E-11    | 245.0646249 |
| OVCA2                  | NM_080822    | 99.26383906 | 16.97272417 | 6.50E-05    | 5.848432938 |
| APOOL                  | NM_198450    | 31.42857143 | 0.489211264 | 0.000885111 | 64.24335197 |
| NFATC2IP               | NM_032815    | 92.75418513 | 4.068299043 | 1.06E-08    | 22.79925447 |
| ABHD17C                | NM_021214    | 106.2445312 | 1.654816207 | 6.92E-11    | 64.20322134 |
| CCDC92                 | NM_025140    | 37.40797988 | 1.785596067 | 0.001755036 | 20.94985566 |
| PAPOLG                 | NM_022894    | 109.3667968 | 0.471711135 | 6.73E-15    | 231.8512089 |
| TMEM5                  | NM_014254    | 172.2239396 | 1.463801275 | 1.03E-20    | 117.6552737 |
| STARD7                 | NM_020151    | 216.6718189 | 6.925215922 | 1.24E-20    | 31.28737377 |
| TTC3                   | NM_001001894 | 201.060491  | 1.276404796 | 6.02E-21    | 157.5209461 |
| LASP1                  | NR_073384    | 135.0810825 | 5.62047799  | 4.07E-12    | 24.0337357  |
| DUS1L                  | NM_022156    | 88.83655131 | 17.605084   | 7.65E-05    | 5.046073697 |

|              |              |             |             |             |             |
|--------------|--------------|-------------|-------------|-------------|-------------|
| KIAA0753     | NM_014804    | 35.34620525 | 0.939497152 | 0.000472894 | 37.62247194 |
| KHK          | NM_006488    | 91.95881691 | 3.308453701 | 4.94E-09    | 27.79510467 |
| TTC27        | NM_001193509 | 51.95881691 | 0.164357975 | 2.34E-06    | 316.1320096 |
| GNG7         | NM_052847    | 97.67310262 | 1.01277825  | 1.09E-10    | 96.4407585  |
| SDAD1        | NM_001288984 | 92.75418513 | 3.197143231 | 4.44E-09    | 29.01158267 |
| PIAS4        | NM_015897    | 51.69369417 | 1.96560957  | 4.84E-05    | 26.29906516 |
| SFT2D2       | NM_199344    | 117.9382254 | 5.77300407  | 2.44E-10    | 20.4292642  |
| C10orf25     | NM_001039380 | 54.55083703 | 2.458114908 | 2.37E-05    | 22.19214279 |
| ZNF267       | NM_001265588 | 112.7541851 | 0.052284957 | 1.08E-19    | 2156.532025 |
| NOL7         | NM_016167    | 156.1415735 | 4.323061125 | 1.86E-16    | 36.11828955 |
| HS3ST1       | NM_005114    | 141.060491  | 7.403269544 | 5.66E-12    | 19.05380996 |
| GNB1L        | NM_053004    | 170.162165  | 3.279323237 | 2.32E-17    | 51.8894152  |
| PDXK         | NM_003681    | 161.060491  | 3.430458886 | 1.76E-15    | 46.95013009 |
| NCLN         | NM_020170    | 87.03989941 | 3.245178248 | 7.08E-08    | 26.82130002 |
| FAM3C        | NM_001040020 | 121.060491  | 2.154649999 | 1.71E-12    | 56.18568725 |
| ZNF425       | NM_001001661 | 147.0398994 | 3.253780184 | 7.05E-15    | 45.1904834  |
| MTMR6        | NM_004685    | 98.73359358 | 0.207461236 | 2.95E-15    | 475.9134547 |
| MSX2         | NM_002449    | 158.9987163 | 5.071773277 | 5.03E-16    | 31.34972871 |
| MRFAP1L1     | NM_203462    | 55.87645073 | 10.34236384 | 0.002328911 | 5.402676948 |
| GRPEL1       | NM_025196    | 118.2033481 | 8.784369314 | 3.10E-09    | 13.45609957 |
| ANXA3        | NM_005139    | 97.93822536 | 3.186729292 | 1.68E-09    | 30.73314875 |
| P2RY2        | NM_176072    | 74.07979883 | 3.647234802 | 1.52E-06    | 20.31122284 |
| LANCL1       | NM_001136574 | 135.8764507 | 0.94411587  | 4.72E-16    | 143.9192529 |
| TBX18        | NM_001080508 | 24.18275656 | 0.389986875 | 0.004865016 | 62.00915488 |
| ARL3         | NM_004311    | 70.16216501 | 3.059311111 | 6.17E-07    | 22.93397515 |
| KATNBL1      | NM_024713    | 124.4478793 | 0.12597028  | 1.59E-19    | 987.9146016 |
| FOXD1        | NM_004472    | 60.53024548 | 6.441420062 | 0.000215071 | 9.397034334 |
| TIMM22       | NM_013337    | 129.6319195 | 5.730896956 | 3.76E-12    | 22.61983081 |
| ANTXR1       | NM_053034    | 69.36679679 | 0.174075025 | 9.70E-09    | 398.487933  |
| SCPEP1       | NM_021626    | 138.4684708 | 3.477783339 | 1.88E-13    | 39.8151516  |
| UQCRFS1      | NM_006003    | 59.26383906 | 3.833558107 | 3.96E-05    | 15.45922545 |
| AUNIP        | NM_001287490 | 135.3462052 | 2.608728995 | 1.06E-14    | 51.88204888 |
| YWHAH        | NM_003405    | 120.5302455 | 7.465503471 | 7.26E-10    | 16.14495874 |
| TLR5         | NM_003268    | 95.87645073 | 0.973751009 | 3.58E-11    | 98.46095131 |
| ATP6V0E2-AS1 | NR_027040    | 44.18275656 | 0.622097432 | 1.23E-05    | 71.02224549 |
| GTF2F2       | NM_004128    | 81.85585918 | 0.433593461 | 1.04E-09    | 188.7848102 |
| POP4         | NR_027368    | 52.22393965 | 1.123432174 | 4.97E-06    | 46.48606374 |
| UGCG         | NM_003358    | 131.6936942 | 2.656965878 | 6.47E-14    | 49.56544428 |
| TPMT         | NM_000367    | 79.79408454 | 0.816651994 | 2.11E-09    | 97.70879781 |
| RPL13AP5     | NR_026712    | 183.9176338 | 34.52873083 | 4.58E-09    | 5.326510108 |
| SHISA4       | NR_030775    | 121.060491  | 10.95623216 | 5.13E-09    | 11.04946383 |
| MIS18A       | NM_018944    | 69.36679679 | 1.640434141 | 4.08E-08    | 42.28563347 |
| MLLT4-AS1    | NR_027906    | 77.40797988 | 11.17967692 | 0.000113798 | 6.923990776 |
| CFAP20       | NM_013242    | 83.91763382 | 3.820765551 | 9.45E-08    | 21.96356534 |
| GPRC5A       | NM_003979    | 77.93822536 | 6.803771644 | 6.82E-06    | 11.45515009 |
| MGA          | NM_001164273 | 76.40669621 | 0.236239674 | 5.23E-10    | 323.4287242 |
| ERP29        | NM_006817    | 101.060491  | 11.11500328 | 4.83E-07    | 9.092259211 |
| FAM71E1      | NM_138411    | 154.3449216 | 1.639682507 | 5.82E-20    | 94.13098019 |
| C11orf58     | NM_014267    | 61.85585918 | 0.922761845 | 2.96E-07    | 67.0333949  |
| LINC00612    | NR_034140    | 153.8146761 | 2.753435998 | 1.24E-17    | 55.86281148 |
| CLCC1        | NM_001048210 | 155.0810825 | 0.803355072 | 1.20E-19    | 193.0417669 |
| CDR2L        | NM_014603    | 234.0797988 | 4.224883047 | 5.90E-25    | 55.40503635 |
| LRP4-AS1     | NR_038909    | 105.2432475 | 3.184615848 | 5.29E-10    | 33.04739175 |
| C19orf44     | NM_032207    | 35.08108251 | 3.753561703 | 0.003862317 | 9.346078546 |
| ERCC6-PGBD3  | NM_001277058 | 126.5096539 | 1.940862483 | 2.15E-14    | 65.1821832  |
| 2-Mar        | NM_017898    | 132.4890624 | 3.181153068 | 1.25E-12    | 41.64812556 |
| TMEM2        | NM_013390    | 180.5302455 | 1.532002525 | 4.34E-19    | 117.8393916 |
| IL15         | NM_172175    | 39.26383906 | 0.658193246 | 0.000108862 | 59.65396835 |
| FUT10        | NM_032664    | 147.0398994 | 0.838832236 | 3.76E-17    | 175.2911882 |
| MAGEA3       | NM_005362    | 45.71428571 | 1.639870555 | 4.36E-05    | 27.87676477 |
| RSPRY1       | NM_133368    | 118.4684708 | 2.103415947 | 4.37E-12    | 56.32194194 |
| POLE4        | NM_019896    | 120.2651227 | 2.042065984 | 5.02E-14    | 58.89384755 |
| LOC101927746 | NR_110115    | 175.3462052 | 11.40017371 | 1.16E-13    | 15.38101171 |
| SPR          | NM_003124    | 120.0592073 | 3.33677672  | 5.17E-13    | 35.98059366 |

|            |              |             |             |             |             |
|------------|--------------|-------------|-------------|-------------|-------------|
| SDHAF2     | NM_017841    | 129.8970423 | 2.786554231 | 1.12E-13    | 46.61565198 |
| MAOB       | NM_000898    | 68.57142857 | 0.458667943 | 3.50E-08    | 149.5012452 |
| CSRNP1     | NM_033027    | 101.8558592 | 5.743992224 | 4.02E-09    | 17.73259002 |
| ITFG1      | NM_030790    | 121.8558592 | 0.041864047 | 3.41E-18    | 2910.751996 |
| CDK2AP2    | NR_073484    | 110.162165  | 11.3647686  | 2.76E-07    | 9.693304715 |
| PPRC1      | NM_001288727 | 143.9176338 | 9.383140606 | 9.44E-12    | 15.3378959  |
| GPRIN1     | NM_052899    | 68.57142857 | 4.927662697 | 4.72E-06    | 13.91560924 |
| ZNF449     | NM_152695    | 49.10167405 | 0.202951594 | 1.09E-07    | 241.9378582 |
| TMEM97     | NM_014573    | 64.71300204 | 3.784271004 | 3.67E-06    | 17.10052001 |
| AAMP       | NM_001087    | 130.4272878 | 8.163504435 | 1.95E-11    | 15.97687473 |
| NOL11      | NM_015462    | 111.4877787 | 1.445965262 | 6.71E-13    | 77.10266743 |
| STK35      | NM_080836    | 127.3050222 | 4.16629476  | 8.36E-12    | 30.55593266 |
| WASH7P     | NR_024540    | 46.50965393 | 1.96896056  | 0.000109248 | 23.62142486 |
| SIK2       | NM_015191    | 66.24453119 | 1.238081882 | 2.46E-07    | 53.50577548 |
| TRMT6      | NM_001281467 | 106.5096539 | 2.282670913 | 1.46E-11    | 46.66010038 |
| PTPLB      | NM_198402    | 123.6525111 | 1.141007164 | 8.17E-13    | 108.3713713 |
| PHC3       | NM_024947    | 78.99871632 | 0.547131667 | 1.20E-09    | 144.3870298 |
| RPS6       | NM_001010    | 132.7541851 | 12.44912629 | 1.66E-09    | 10.66373511 |
| MPV17      | NM_002437    | 89.89704227 | 3.674884746 | 1.35E-08    | 24.4625474  |
| GCA        | NM_012198    | 81.85585918 | 1.554492823 | 1.76E-09    | 52.65759866 |
| PWP1       | NM_007062    | 82.12098192 | 2.336665403 | 1.24E-08    | 35.14451912 |
| TMEM192    | NM_001100389 | 122.3861047 | 2.251266281 | 4.19E-13    | 54.36322912 |
| C1orf145   | NR_073154    | 71.42857143 | 5.637803187 | 7.61E-06    | 12.6695752  |
| C9orf3     | NM_032823    | 118.4684708 | 0.550129418 | 7.31E-13    | 215.3465475 |
| VPS18      | NM_020857    | 58.46847084 | 2.965228118 | 2.53E-05    | 19.71803467 |
| PFN2       | NM_002628    | 72.22393965 | 7.827968658 | 2.72E-05    | 9.226396119 |
| B2M        | NM_004048    | 161.8558592 | 1.697321265 | 2.58E-20    | 95.35958954 |
| ANKRD13D   | NR_030767    | 51.95881691 | 2.23074733  | 2.22E-05    | 23.29211211 |
| POLR2C     | NM_032940    | 89.89704227 | 7.360968384 | 8.03E-07    | 12.21266518 |
| SUGP1      | NM_172231    | 109.3667968 | 1.794258433 | 1.83E-11    | 60.95375938 |
| CDC123     | NM_006023    | 103.9176338 | 2.987494543 | 3.43E-10    | 34.78420874 |
| STRIP2     | NM_020704    | 146.5096539 | 1.047273042 | 1.30E-16    | 139.8963288 |
| ZNF554     | NM_001102651 | 123.3873883 | 4.170877631 | 2.75E-12    | 29.58307561 |
| KCTD21-AS1 | NR_102281    | 52.75418513 | 1.097253903 | 3.02E-05    | 48.07837548 |
| GJB2       | NM_004004    | 108.8365513 | 14.20950909 | 4.82E-07    | 7.659416709 |
| DDX18      | NM_006773    | 44.18275656 | 0.974847048 | 0.000128496 | 45.3227577  |
| CEP85L     | NM_206921    | 86.77477667 | 0.735074686 | 1.09E-09    | 118.0489253 |
| EME2       | NM_001257370 | 118.4684708 | 13.14351491 | 9.97E-08    | 9.013454291 |
| ELAC1      | NM_018696    | 138.7335936 | 1.728468669 | 5.46E-17    | 80.26387522 |
| SGTA       | NM_003021    | 110.4272878 | 1.967254058 | 3.09E-12    | 56.13270299 |
| LIN9       | NM_001270409 | 61.3256137  | 0.781996585 | 4.71E-07    | 78.42184333 |
| DDIAS      | NM_145018    | 67.30502215 | 1.056523206 | 2.23E-07    | 63.70425351 |
| PCSK4      | NM_017573    | 47.57014489 | 1.749435147 | 1.87E-05    | 27.1917167  |
| VSNL1      | NM_003385    | 51.95881691 | 1.035945509 | 7.91E-06    | 50.15593623 |
| GOLGA3     | NM_001172557 | 69.89704227 | 1.397454889 | 5.86E-07    | 50.0173872  |
| ZNFX1      | NM_021035    | 107.0398994 | 3.672459893 | 9.51E-10    | 29.14664899 |
| PPAPDC2    | NM_203453    | 138.2033481 | 11.56436695 | 2.68E-10    | 11.95079235 |
| ARIH1      | NM_005744    | 152.4890624 | 1.271423748 | 1.12E-15    | 119.9356726 |
| GDE1       | NM_016641    | 141.8558592 | 2.567312136 | 2.88E-15    | 55.25462105 |
| FOSL2      | NM_005253    | 118.2033481 | 1.150955093 | 1.91E-14    | 102.700226  |
| MAP4K5     | NM_006575    | 84.71300204 | 0.64100863  | 4.97E-10    | 132.1557902 |
| GINS3      | NM_001126130 | 64.4478793  | 1.14062926  | 7.49E-08    | 56.50203933 |
| RRAGD      | NM_021244    | 52.48906239 | 0.544955583 | 1.72E-06    | 96.31805602 |
| FUCA1      | NM_000147    | 90.42728775 | 2.165385655 | 6.89E-10    | 41.76036151 |
| TRUB1      | NM_139169    | 99.79408454 | 0.545228116 | 1.26E-13    | 183.031802  |
| MFN1       | NM_033540    | 77.67310262 | 1.07140997  | 3.64E-08    | 72.49615443 |
| TOR1A      | NM_000113    | 129.3667968 | 6.134708265 | 4.28E-12    | 21.08768522 |
| KITLG      | NM_003994    | 124.1827566 | 9.356307978 | 8.81E-10    | 13.27262386 |
| GANC       | NM_198141    | 40.79536822 | 0.521434062 | 8.10E-05    | 78.23686869 |
| ITGA5      | NM_002205    | 153.0193079 | 3.222722862 | 6.36E-16    | 47.48137349 |
| NANP       | NM_152667    | 149.1016741 | 3.381369513 | 7.25E-16    | 44.09505482 |
| TRA2B      | NM_004593    | 154.550837  | 7.512065677 | 1.10E-13    | 20.57368022 |
| ABCB6      | NM_005689    | 137.6731026 | 7.483718712 | 2.86E-12    | 18.39634918 |
| TAF9       | NM_003187    | 141.060491  | 3.784023607 | 8.61E-15    | 37.27790986 |

|              |              |             |             |             |             |
|--------------|--------------|-------------|-------------|-------------|-------------|
| ABCE1        | NM_002940    | 67.57014489 | 3.002696275 | 9.67E-07    | 22.50315673 |
| KCNMB4       | NM_014505    | 31.95881691 | 0.126774471 | 0.000238767 | 252.0918968 |
| MZT2A        | NM_001085365 | 83.1222656  | 10.18540319 | 1.64E-05    | 8.160920491 |
| GPR180       | NM_180989    | 187.3050222 | 0.539737999 | 2.94E-26    | 347.0295266 |
| TP53INP1     | NM_001135733 | 66.50965393 | 0.573710768 | 5.11E-08    | 115.9288924 |
| SNAP29       | NM_004782    | 129.6319195 | 0.663742243 | 1.62E-16    | 195.3046094 |
| METTL8       | NM_024770    | 152.2239396 | 0.907865188 | 1.73E-17    | 167.6724051 |
| FER          | NM_005246    | 43.1222656  | 0.264823723 | 6.86E-05    | 162.8338469 |
| HPS3         | NM_032383    | 144.713002  | 1.960639022 | 8.95E-16    | 73.80910022 |
| CDK11A       | NM_024011    | 78.2033481  | 0.546517601 | 7.75E-10    | 143.093924  |
| RAD23A       | NR_072976    | 46.24453119 | 6.346753326 | 0.003212944 | 7.286328745 |
| RAB11B-AS1   | NR_038237    | 77.93822536 | 4.353634415 | 5.56E-07    | 17.90187644 |
| MTAP         | NM_002451    | 175.3462052 | 9.632283843 | 7.19E-14    | 18.20401144 |
| GGA2         | NM_015044    | 121.3256137 | 2.681732784 | 2.80E-12    | 45.24149998 |
| SIRT4        | NM_012240    | 58.99871632 | 3.121728427 | 1.58E-05    | 18.89937504 |
| 1-Mar        | NM_022746    | 44.18275656 | 3.369191119 | 0.000523591 | 13.11375787 |
| C12orf75     | NM_001145199 | 88.83655131 | 1.414821473 | 2.14E-09    | 62.78993711 |
| PARGP1       | NR_029388    | 78.2033481  | 0.230094251 | 5.82E-10    | 339.8752801 |
| LOC100506083 | NR_039997    | 58.46847084 | 3.475695085 | 1.82E-05    | 16.8220944  |
| MTERF3       | NM_001286643 | 246.5096539 | 3.161356602 | 5.96E-28    | 77.97590875 |
| TBK1         | NM_013254    | 127.3050222 | 0.681719788 | 2.14E-15    | 186.7409814 |
| NUDT6        | NM_007083    | 69.36679679 | 1.098716679 | 1.98E-07    | 63.13438043 |
| PLOD1        | NM_000302    | 130.162165  | 3.874575319 | 2.79E-12    | 33.59391786 |
| ZNF282       | NM_003575    | 158.2033481 | 0.261737337 | 1.23E-23    | 604.4355374 |
| RITA1        | NM_032848    | 137.6731026 | 4.568541962 | 7.28E-14    | 30.13501983 |
| AIFM2        | NM_001198696 | 115.611328  | 4.079910837 | 4.80E-11    | 28.33672906 |
| ZNF365       | NM_199451    | 60.53024548 | 0.403833462 | 8.90E-07    | 149.8891281 |
| ASCC3        | NM_022091    | 130.6924105 | 2.667604847 | 2.15E-13    | 48.99241754 |
| MFSD9        | NM_032718    | 177.9382254 | 0.664829682 | 1.56E-25    | 267.6448272 |
| TADA1        | NM_053053    | 35.61132799 | 3.551678766 | 0.003555657 | 10.02661849 |
| FA2H         | NM_024306    | 50.16216501 | 1.12107675  | 5.47E-06    | 44.74463057 |
| INTS3        | NM_023015    | 103.1222656 | 0.809290772 | 9.30E-12    | 127.4230093 |
| STAG3L3      | NR_040582    | 131.9588169 | 3.511011166 | 4.77E-14    | 37.5842772  |
| COG1         | NM_018714    | 176.1415735 | 9.049687087 | 1.33E-15    | 19.46383027 |
| CCDC176      | NM_025057    | 58.2033481  | 1.464002036 | 1.27E-05    | 39.75633002 |
| LINC00893    | NR_027455    | 28.83655131 | 0.210893089 | 0.000178833 | 136.7354023 |
| LOC389641    | NR_033928    | 151.4877787 | 5.449410181 | 4.88E-15    | 27.7989312  |
| BLM          | NM_001287246 | 95.34620525 | 0.079452475 | 1.59E-14    | 1200.040719 |
| GAS6-AS2     | NR_044993    | 47.03989941 | 3.265815631 | 0.000443059 | 14.40372168 |
| MEIG1        | NM_001080836 | 183.1222656 | 6.882906542 | 4.48E-17    | 26.6053686  |
| PIGH         | NM_004569    | 149.8970423 | 2.59428284  | 1.63E-16    | 57.77976092 |
| SUGP2        | NM_014884    | 118.2033481 | 3.945979187 | 1.04E-10    | 29.95539066 |
| VPRBP        | NM_001171904 | 55.08108251 | 0.985143538 | 3.39E-06    | 55.91173306 |
| ALG14        | NM_144988    | 37.93822536 | 0.222622431 | 9.53E-05    | 170.4151067 |
| KIAA2018     | NM_001009899 | 60.26512274 | 2.05657659  | 8.55E-06    | 29.30361214 |
| ABCA11P      | NR_002451    | 146.7747767 | 1.325909646 | 2.47E-16    | 110.6974198 |
| AK7          | NM_152327    | 63.38738834 | 1.164433105 | 4.06E-07    | 54.43626436 |
| PMM1         | NM_002676    | 103.9176338 | 1.790295136 | 1.64E-11    | 58.04497356 |
| PKN2-AS1     | NR_110682    | 35.61132799 | 0.315965785 | 0.000423115 | 112.7062791 |
| RND3         | NM_001254738 | 101.3256137 | 6.672495173 | 2.94E-08    | 15.18556568 |
| COX6B1       | NM_001863    | 63.91763382 | 5.579248668 | 7.31E-05    | 11.45631565 |
| EEPDI        | NM_030636    | 125.9794085 | 0.795021888 | 2.73E-14    | 158.4603019 |
| MND1         | NM_032117    | 93.01930787 | 0.741402491 | 1.94E-11    | 125.4639807 |
| ENDOG        | NM_004435    | 120.7953682 | 15.78319999 | 2.36E-07    | 7.653414283 |
| EEF2K        | NM_013302    | 118.2033481 | 1.13638449  | 2.87E-12    | 104.0170375 |
| LSM11        | NM_173491    | 50.16216501 | 2.249450162 | 2.22E-05    | 22.299745   |
| PTPN21       | NM_007039    | 34.55083703 | 0.925359619 | 0.000537701 | 37.33774017 |
| PDLIM1       | NM_020992    | 61.3256137  | 1.110572119 | 5.26E-06    | 55.21983907 |
| C12orf73     | NM_001135570 | 107.3050222 | 5.283802416 | 7.22E-10    | 20.30829575 |
| NUFIP1       | NM_012345    | 60.79536822 | 1.91971849  | 8.34E-06    | 31.66889757 |
| TMEM203      | NM_053045    | 56.93694168 | 1.478772255 | 1.62E-05    | 38.50284688 |
| KCNK5        | NM_003740    | 141.8558592 | 2.707186393 | 4.65E-15    | 52.39973855 |
| WEE2-AS1     | NR_015392    | 35.34620525 | 1.491615974 | 0.003131679 | 23.69658535 |
| NEK8         | NM_178170    | 47.03989941 | 2.789613772 | 0.000144022 | 16.86251333 |

|              |              |             |             |             |             |
|--------------|--------------|-------------|-------------|-------------|-------------|
| LOC100132057 | NR_111930    | 164.713002  | 5.160035912 | 4.64E-16    | 31.92090227 |
| POLQ         | NM_199420    | 90.16216501 | 1.097495512 | 2.66E-10    | 82.15265029 |
| C12orf29     | NM_001009894 | 158.9987163 | 5.327975139 | 1.35E-15    | 29.84224066 |
| NPAT         | NM_002519    | 84.97812478 | 1.145222046 | 8.00E-09    | 74.20231308 |
| YBEY         | NM_001006114 | 120.7953682 | 4.40164397  | 4.98E-12    | 27.44323917 |
| PRPF4        | NM_004697    | 169.6319195 | 3.612099197 | 3.33E-18    | 46.96214315 |
| ZNF574       | NM_022752    | 101.060491  | 4.897531246 | 2.70E-09    | 20.63498646 |
| DPY19L2P3    | NR_036482    | 111.9588169 | 9.470282156 | 1.12E-08    | 11.82212051 |
| UACA         | NM_018003    | 127.8352676 | 0.167351725 | 2.68E-18    | 763.8718272 |
| LMO4         | NM_006769    | 49.10167405 | 8.167824082 | 0.002973092 | 6.011597894 |
| ZNF658       | NM_033160    | 104.713002  | 0.629440149 | 4.28E-14    | 166.3589497 |
| MAN2B2       | NM_015274    | 118.4684708 | 1.476323908 | 1.20E-12    | 80.24558175 |
| MIR31HG      | NR_027054    | 135.0810825 | 7.015751241 | 7.20E-11    | 19.25397265 |
| NUP155       | NM_001278312 | 49.63191953 | 1.769359055 | 0.000160826 | 28.05079013 |
| RBX1         | NM_014248    | 112.2239396 | 4.927509954 | 1.78E-10    | 22.7749798  |
| RHEB         | NM_005614    | 68.10039037 | 2.359749907 | 1.27E-06    | 28.85915587 |
| PLIN2        | NM_001122    | 35.61132799 | 2.934387072 | 0.002576274 | 12.13586589 |
| GALNT6       | NM_007210    | 73.28443061 | 1.948929356 | 1.72E-07    | 37.60240482 |
| RAB4A        | NM_001271998 | 98.46847084 | 2.649742498 | 5.62E-10    | 37.16152454 |
| METTL10      | NM_212554    | 204.1827566 | 1.183726783 | 1.56E-25    | 172.4914563 |
| ACTL6A       | NM_178042    | 129.1016741 | 3.33664389  | 1.10E-12    | 38.69207452 |
| METTL16      | NM_024086    | 78.2033481  | 1.333429801 | 1.53E-07    | 58.64826782 |
| BCR          | NM_021574    | 61.3256137  | 2.481001228 | 1.53E-05    | 24.71809083 |
| LOC283335    | NR_033854    | 183.3873883 | 26.10712151 | 1.18E-10    | 7.024420071 |
| SCLY         | NM_016510    | 58.46847084 | 2.697491106 | 1.78E-05    | 21.67513016 |
| EIF2B5       | NM_003907    | 115.3462052 | 5.761114427 | 1.30E-10    | 20.02150916 |
| LINC00263    | NR_026762    | 141.3256137 | 5.741550582 | 4.17E-13    | 24.61453778 |
| LOC100507373 | NR_045214    | 110.4272878 | 6.176652708 | 3.92E-09    | 17.87817657 |
| CDH15        | NM_004933    | 57.67310262 | 4.466183443 | 0.000104208 | 12.91328566 |
| NSMCE1       | NM_145080    | 75.61132799 | 1.285636395 | 1.07E-07    | 58.81237359 |
| C21orf59     | NM_021254    | 184.9781248 | 4.793143851 | 6.64E-19    | 38.5922331  |
| SYNJ2        | NM_003898    | 120.7953682 | 1.814353    | 7.41E-12    | 66.57765506 |
| CLDN3        | NM_001306    | 60.79536822 | 1.98142815  | 2.28E-05    | 30.68260044 |
| PRH1         | NM_001291315 | 135.0810825 | 0.428407231 | 3.13E-15    | 315.3099967 |
| FEM1C        | NM_020177    | 75.08108251 | 1.901924551 | 7.17E-08    | 39.47637275 |
| PXMP2        | NM_018663    | 60.53024548 | 2.912149867 | 4.32E-06    | 20.78541567 |
| NBEAL2       | NM_015175    | 55.34620525 | 5.3030441   | 0.000240621 | 10.43668584 |
| CXCL16       | NM_001100812 | 108.8365513 | 11.72720108 | 8.14E-08    | 9.280692858 |
| SNX30        | NM_001012994 | 46.77477667 | 0.482386572 | 2.28E-05    | 96.96533723 |
| ATP5G1       | NM_001002027 | 128.3655131 | 17.27115309 | 4.86E-08    | 7.432364965 |
| ARHGAP31-AS1 | NR_046748    | 41.59073644 | 0.64388066  | 1.82E-05    | 64.59385883 |
| SLC39A13     | NM_152264    | 72.22393965 | 11.78923474 | 0.000206007 | 6.126261904 |
| C8orf44      | NM_019607    | 67.57014489 | 3.296933644 | 2.51E-06    | 20.49484527 |
| HEXA-AS1     | NR_027262    | 86.77477667 | 6.372310761 | 7.36E-07    | 13.61747409 |
| LRRC8C       | NM_032270    | 109.1016741 | 0.547443956 | 1.97E-13    | 199.2928645 |
| FIG4         | NM_014845    | 118.2033481 | 0.606816203 | 9.91E-14    | 194.7926694 |
| MYEOV2       | NM_138336    | 92.48906239 | 0.124061596 | 2.66E-15    | 745.5092113 |
| ARRB1        | NM_020251    | 73.01930787 | 3.140870124 | 5.38E-07    | 23.24811437 |
| WDR43        | NM_015131    | 98.46847084 | 1.675044379 | 5.38E-10    | 58.78558926 |
| SPTSSA       | NM_138288    | 112.2239396 | 3.238079814 | 1.38E-10    | 34.65755822 |
| CNIH1        | NM_005776    | 70.42728775 | 2.328222285 | 8.57E-08    | 30.24938306 |
| PPM1D        | NM_003620    | 137.4671872 | 1.556656744 | 1.74E-14    | 88.30924845 |
| TALDO1       | NM_006755    | 87.03989941 | 8.371784655 | 9.55E-07    | 10.39681537 |
| COMMD7       | NM_053041    | 35.34620525 | 1.227784236 | 0.003131679 | 28.78861302 |
| EXOSC9       | NM_001034194 | 53.81467609 | 2.614216641 | 1.53E-05    | 20.58539268 |
| JAGN1        | NM_032492    | 157.4079799 | 7.014010437 | 9.15E-15    | 22.44193693 |
| UTP6         | NM_018428    | 129.6319195 | 0.377287711 | 1.65E-17    | 343.5890319 |
| RAB21        | NM_014999    | 80.26512274 | 1.25575518  | 1.08E-08    | 63.91781138 |
| DNAJA2       | NM_005880    | 109.6319195 | 2.888265032 | 5.84E-11    | 37.95770759 |
| SF3B2        | NM_006842    | 90.16216501 | 4.1419529   | 1.25E-08    | 21.76803242 |
| RCN1         | NM_002901    | 92.75418513 | 6.934608258 | 1.61E-07    | 13.37554793 |
| RTKN2        | NM_145307    | 95.87645073 | 0.167798874 | 4.31E-14    | 571.3772003 |
| CISD2        | NM_001008388 | 209.6319195 | 4.234557217 | 8.10E-21    | 49.50503885 |
| TDRD3        | NM_001146071 | 148.8365513 | 0.101290454 | 2.12E-21    | 1469.40353  |



|              |              |             |             |             |             |
|--------------|--------------|-------------|-------------|-------------|-------------|
| MCOLN1       | NM_020533    | 98.2033481  | 6.189018185 | 1.96E-08    | 15.86735491 |
| AKR7A2       | NM_003689    | 206.5096539 | 6.501809362 | 3.96E-20    | 31.76187465 |
| PNKP         | NM_007254    | 115.611328  | 14.53717177 | 1.87E-07    | 7.95280745  |
| ANKRD36      | NM_001164315 | 113.8146761 | 0.217737498 | 8.05E-15    | 522.7150915 |
| HSF1         | NM_005526    | 169.8970423 | 5.668353805 | 1.19E-15    | 29.97290715 |
| ACAT1        | NM_000019    | 120.7953682 | 5.805206889 | 3.28E-10    | 20.80810737 |
| SVIP         | NM_148893    | 157.6731026 | 0.439497416 | 2.08E-23    | 358.7577466 |
| LRP10        | NM_014045    | 135.3462052 | 7.805171187 | 8.82E-12    | 17.34058126 |
| DICER1-AS1   | NR_015415    | 95.34620525 | 0.79026569  | 7.41E-12    | 120.6508222 |
| DEAF1        | NM_021008    | 35.08108251 | 3.232494198 | 0.004334065 | 10.85263588 |
| DNAJC25      | NR_037148    | 241.3256137 | 0.880740617 | 1.13E-32    | 274.003048  |
| ERV3-1       | NM_001007253 | 157.6731026 | 2.838363514 | 2.01E-17    | 55.55070795 |
| POLR1D       | NM_152705    | 134.8159598 | 1.655749631 | 1.30E-14    | 81.42291398 |
| ZNF664       | NM_001204298 | 60.53024548 | 3.512599977 | 1.10E-05    | 17.23231961 |
| PGLS         | NM_012088    | 112.7541851 | 5.576929849 | 2.01E-10    | 20.21796727 |
| HP1BP3       | NM_016287    | 124.1827566 | 1.760066682 | 3.44E-13    | 70.55571121 |
| PIGX         | NM_017861    | 143.1222656 | 2.294285135 | 3.44E-15    | 62.38207423 |
| SNX18        | NM_001145427 | 121.8558592 | 0.631804032 | 5.09E-16    | 192.8697081 |
| RPF1         | NM_025065    | 47.30502215 | 4.811414803 | 0.000675875 | 9.831832026 |
| INSIG2       | NM_016133    | 74.55083703 | 0.659002873 | 3.45E-09    | 113.1267254 |
| GDAP1        | NM_018972    | 168.3655131 | 0.503765009 | 1.39E-25    | 334.2143859 |
| LOC100130950 | NR_034082    | 32.48906239 | 0.938749375 | 0.000855517 | 34.6088778  |
| EREG         | NM_001432    | 167.0398994 | 13.16114491 | 1.06E-12    | 12.69189729 |
| SLX4         | NM_032444    | 127.5701449 | 0.552227284 | 4.97E-17    | 231.0102173 |
| TMEM181      | NM_020823    | 38.2033481  | 2.377756558 | 0.002429763 | 16.06697203 |
| TRIM56       | NM_030961    | 66.77477667 | 8.141497552 | 8.83E-05    | 8.201780599 |
| PLEKHM1P     | NR_024386    | 175.8764507 | 3.387914943 | 4.02E-17    | 51.91288851 |
| NGDN         | NM_015514    | 35.87645073 | 0.31175948  | 6.63E-05    | 115.0773369 |
| C12orf5      | NM_020375    | 127.0398994 | 0.577213201 | 5.60E-16    | 220.091812  |
| TIA1         | NM_022037    | 115.0810825 | 2.462467152 | 6.67E-12    | 46.73405792 |
| DRG1         | NM_004147    | 127.0398994 | 2.694753757 | 2.83E-13    | 47.14341675 |
| CDR2         | NM_001802    | 132.2239396 | 1.148689402 | 7.36E-16    | 115.1085223 |
| LOC645513    | NR_037630    | 42.12098192 | 1.480378184 | 0.000446323 | 28.45285238 |
| NAGPA        | NM_016256    | 52.75418513 | 0.512257237 | 7.90E-07    | 102.9837772 |
| NANS         | NM_018946    | 165.9794085 | 2.28738487  | 7.03E-18    | 72.56295634 |
| ZNF391       | NM_001076781 | 50.42728775 | 2.167015944 | 2.00E-05    | 23.27038151 |
| ZNF624       | NM_020787    | 93.01930787 | 0.549809444 | 9.31E-12    | 169.1846308 |
| TTC21A       | NM_001105513 | 69.36679679 | 0.855744705 | 1.18E-07    | 81.06015309 |
| UBE2S        | NM_014501    | 181.3256137 | 20.85963835 | 8.53E-12    | 8.692653759 |
| AMDHD1       | NM_152435    | 86.77477667 | 1.802632173 | 2.75E-09    | 48.13781646 |
| ANKIB1       | NM_019004    | 46.50965393 | 0.468976067 | 2.61E-05    | 99.17276649 |
| LAPTM4B      | NM_018407    | 213.2844306 | 1.547883656 | 2.19E-23    | 137.790996  |
| IL10RB       | NM_000628    | 101.060491  | 2.580301975 | 1.94E-10    | 39.16614875 |
| BNIP2        | NM_004330    | 60.79536822 | 2.243957714 | 5.26E-06    | 27.09292062 |
| DHX30        | NM_138615    | 133.0193079 | 5.991461783 | 3.90E-12    | 22.20147815 |
| ATP6V1C1     | NM_001695    | 115.611328  | 2.343264011 | 1.14E-11    | 49.33773037 |
| C11orf91     | NM_001166692 | 46.50965393 | 3.956702837 | 0.000530464 | 11.75464923 |
| C2orf47      | NM_024520    | 175.3462052 | 10.19425628 | 1.59E-14    | 17.20049021 |
| EFNA1        | NM_182685    | 132.4890624 | 10.6843097  | 4.55E-10    | 12.40033901 |
| AP1M2        | NM_005498    | 34.87516705 | 2.667281816 | 0.002741311 | 13.07517145 |
| ZSCAN25      | NM_145115    | 118.4684708 | 2.440915235 | 1.36E-12    | 48.5344469  |
| TIMM44       | NM_006351    | 60.79536822 | 4.627485883 | 4.32E-05    | 13.13788302 |
| FAM199X      | NM_207318    | 114.550837  | 0.44779105  | 1.96E-15    | 255.8131456 |
| DEPDC4       | NM_152317    | 103.6525111 | 2.577577262 | 9.89E-11    | 40.21315389 |
| GEMIN4       | NM_015721    | 146.5096539 | 9.694125992 | 1.25E-11    | 15.11324013 |
| STX16-NPEPL1 | NR_037945    | 138.7335936 | 2.140340359 | 2.01E-14    | 64.81847293 |
| SKIV2L2      | NM_015360    | 64.4478793  | 0.655926229 | 1.31E-07    | 98.25476783 |
| GFM1         | NM_024996    | 84.71300204 | 0.355508509 | 7.35E-12    | 238.2868477 |
| SLC30A3      | NM_003459    | 181.8558592 | 5.443219062 | 6.67E-19    | 33.40961609 |
| C22orf23     | NM_032561    | 50.16216501 | 6.063344324 | 0.001081834 | 8.273019366 |
| INO80B-WBP1  | NR_037849    | 132.2239396 | 28.00074067 | 3.10E-06    | 4.722158646 |
| LRRC29       | NM_001004055 | 30.42728775 | 1.46173803  | 0.004835826 | 20.81582823 |
| EIF2D        | NM_006893    | 121.3256137 | 1.576251271 | 2.82E-14    | 76.97098549 |
| PCNP         | NM_020357    | 101.3256137 | 2.170631071 | 3.65E-11    | 46.68025583 |

|              |              |             |             |             |             |
|--------------|--------------|-------------|-------------|-------------|-------------|
| ACO2         | NM_001098    | 72.75418513 | 5.351033465 | 7.24E-06    | 13.5962867  |
| PGBD2        | NM_170725    | 154.8159598 | 3.922419781 | 7.11E-16    | 39.46950311 |
| RIC8B        | NM_018157    | 161.060491  | 1.060984801 | 6.68E-17    | 151.8028259 |
| ORAI1        | NM_032790    | 113.0193079 | 5.2969389   | 3.29E-10    | 21.33672107 |
| FNDC3A       | NR_103528    | 97.67310262 | 0.123946321 | 1.19E-12    | 788.027444  |
| TMEM50A      | NM_014313    | 141.5907364 | 1.015282975 | 2.69E-18    | 139.4593822 |
| HAUS3        | NM_024511    | 126.2445312 | 1.027633218 | 4.63E-17    | 122.849796  |
| PPIH         | NM_006347    | 87.03989941 | 3.325926226 | 4.57E-08    | 26.1701233  |
| BMPR1A       | NM_004329    | 88.57142857 | 0.758797818 | 5.79E-10    | 116.7259927 |
| GPATCH1      | NM_018025    | 58.46847084 | 2.239243498 | 1.85E-05    | 26.11081416 |
| PANK4        | NM_018216    | 43.1222656  | 0.827298978 | 0.000108466 | 52.12416157 |
| RSF1         | NM_016578    | 76.14157347 | 0.662059351 | 8.70E-09    | 115.0071718 |
| C1orf106     | NM_018265    | 46.77477667 | 2.215991818 | 0.000190276 | 21.10782914 |
| CCDC24       | NM_152499    | 75.61132799 | 12.70703617 | 0.000216234 | 5.950351204 |
| PINX1        | NM_017884    | 98.99871632 | 0.388930246 | 4.67E-13    | 254.5410578 |
| WDFY2        | NM_052950    | 89.89704227 | 0.352694173 | 1.63E-10    | 254.8866668 |
| DNAJC13      | NM_015268    | 87.30502215 | 0.23058819  | 1.66E-11    | 378.6187934 |
| LINC01144    | NR_024270    | 157.4079799 | 8.033941784 | 6.85E-13    | 19.59287036 |
| IPO5P1       | NR_103742    | 41.06049096 | 2.102055254 | 0.00066831  | 19.53349745 |
| CIB1         | NM_001277764 | 91.95881691 | 14.9518187  | 3.56E-05    | 6.150343231 |
| EMC7         | NM_020154    | 101.060491  | 0.795234548 | 4.50E-13    | 127.0826213 |
| MAK          | NM_001242957 | 38.73359358 | 1.05693706  | 0.000121724 | 36.64702    |
| LOC100130238 | NR_024563    | 41.3256137  | 1.890181688 | 0.000805004 | 21.86330232 |
| ZNF598       | NM_178167    | 54.28571429 | 3.13922743  | 8.35E-05    | 17.29269876 |
| DGAT1        | NM_012079    | 149.6319195 | 20.00717392 | 2.45E-09    | 7.478913318 |
| RRP1B        | NM_015056    | 146.5096539 | 2.594232708 | 1.27E-15    | 56.47513944 |
| XPO5         | NM_020750    | 160.7953682 | 3.102314772 | 1.92E-16    | 51.83077155 |
| RAB11FIP5    | NM_015470    | 77.67310262 | 0.421572667 | 1.41E-10    | 184.2460594 |
| LINC01504    | NR_110952    | 40.79536822 | 0.336283048 | 2.23E-05    | 121.3125921 |
| PM20D2       | NM_001010853 | 177.9382254 | 1.077201343 | 6.58E-24    | 165.1856698 |
| SHQ1         | NM_018130    | 128.8365513 | 0.621657047 | 1.36E-15    | 207.2469892 |
| ARID3B       | NM_006465    | 135.0810825 | 1.211407164 | 9.46E-15    | 111.5075811 |
| LOC643339    | NR_040096    | 86.50965393 | 0.404661984 | 1.49E-09    | 213.7825081 |
| KARS         | NM_001130089 | 104.1827566 | 1.753375305 | 6.82E-12    | 59.41840077 |
| CFL1         | NM_005507    | 127.3050222 | 24.4874911  | 1.60E-06    | 5.198777678 |
| ADD3-AS1     | NR_038943    | 167.3050222 | 0.909203542 | 1.49E-19    | 184.0127259 |
| ABHD14A-ACY1 | NR_037192    | 160.7953682 | 16.40463118 | 4.88E-11    | 9.801827697 |
| SMARCC1      | NM_003074    | 142.1209819 | 1.884433872 | 6.74E-14    | 75.41839701 |
| AP1AR        | NM_018569    | 157.6731026 | 1.282510378 | 2.00E-18    | 122.9409955 |
| MSN          | NM_002444    | 66.24453119 | 0.977448424 | 1.21E-07    | 67.7729173  |
| EMP3         | NM_001425    | 81.06049096 | 7.749484505 | 2.34E-06    | 10.46011395 |
| LY6E         | NM_002346    | 120.5302455 | 16.1936043  | 2.16E-07    | 7.443077108 |
| DSC2         | NM_004949    | 83.91763382 | 1.253301956 | 6.25E-09    | 66.9572352  |
| PLA2G15      | NM_012320    | 81.06049096 | 1.62336555  | 3.10E-09    | 49.93360304 |
| SBDS         | NM_016038    | 144.713002  | 0.679886864 | 1.51E-21    | 212.8486514 |
| CPEB4        | NM_030627    | 74.07979883 | 0.866453431 | 9.05E-09    | 85.49772688 |
| NAGK         | NM_017567    | 213.2844306 | 7.170525344 | 1.72E-20    | 29.74460313 |
| STK38L       | NM_015000    | 146.7747767 | 0.843684395 | 3.48E-16    | 173.9688177 |
| PTPRE        | NM_130435    | 101.5907364 | 1.119671546 | 1.57E-11    | 90.73262316 |
| MRPS5        | NM_031902    | 168.8365513 | 1.101178143 | 1.11E-20    | 153.3235584 |
| NUP160       | NM_015231    | 117.9382254 | 0.655403509 | 1.35E-14    | 179.9475036 |
| ZFR          | NM_016107    | 114.550837  | 1.431794808 | 1.30E-11    | 80.00506526 |
| C9orf78      | NM_016520    | 161.5907364 | 0.826685114 | 6.08E-23    | 195.4683032 |
| RTTN         | NM_173630    | 115.3462052 | 0.36992587  | 1.74E-13    | 311.8089724 |
| ANO9         | NM_001012302 | 45.71428571 | 0.682884859 | 4.73E-06    | 66.94288955 |
| CPSF1        | NM_013291    | 225.5083703 | 6.611850231 | 1.02E-21    | 34.10669667 |
| LUZP1        | NM_033631    | 160.7953682 | 1.378299877 | 5.92E-17    | 116.6621074 |
| RELT         | NM_152222    | 204.4478793 | 3.407835142 | 1.45E-22    | 59.99347702 |
| MCM5         | NM_006739    | 35.87645073 | 2.599815354 | 0.001743834 | 13.79961491 |
| C15orf52     | NM_207380    | 95.61132799 | 12.4540405  | 1.95E-06    | 7.677133213 |
| GRAMD1C      | NM_017577    | 109.6319195 | 0.197609374 | 6.73E-15    | 554.7910887 |
| MSRB2        | NM_012228    | 118.2033481 | 1.921568678 | 3.87E-13    | 61.51398566 |
| CEP72        | NM_018140    | 37.14285714 | 0.12068393  | 1.36E-05    | 307.7697006 |
| CERS2        | NM_181746    | 57.40797988 | 6.724428879 | 0.000307479 | 8.53722761  |

|              |              |             |             |             |             |
|--------------|--------------|-------------|-------------|-------------|-------------|
| LOC101927124 | NR_110045    | 49.89704227 | 0.981608322 | 5.37E-05    | 50.83192671 |
| WDR25        | NM_001161476 | 96.40669621 | 1.159556017 | 9.82E-11    | 83.14104262 |
| CCT5         | NM_012073    | 86.77477667 | 6.862162687 | 6.99E-07    | 12.64539776 |
| NUP214       | NM_005085    | 106.7747767 | 1.231343877 | 1.24E-10    | 86.71401924 |
| DIS3L        | NM_001143688 | 109.6319195 | 3.694244851 | 6.91E-10    | 29.67640857 |
| AHCY         | NM_000687    | 133.2844306 | 8.332743843 | 1.01E-10    | 15.99526316 |
| ARV1         | NM_022786    | 87.30502215 | 1.452175212 | 4.10E-10    | 60.12017106 |
| RNMT         | NM_003799    | 83.65251108 | 0.559063869 | 4.09E-11    | 149.6296142 |
| AK8          | NM_152572    | 27.83526763 | 0.044407089 | 0.000476506 | 626.8203583 |
| GLUD1        | NM_005271    | 69.63191953 | 1.353690532 | 5.59E-07    | 51.43858058 |
| PITHD1       | NM_020362    | 157.4079799 | 4.039144644 | 8.10E-17    | 38.97062219 |
| NFE2L1       | NM_003204    | 195.3462052 | 19.66447831 | 1.48E-13    | 9.93396327  |
| C6orf165     | NM_001031743 | 49.63191953 | 0.858743464 | 8.56E-06    | 57.79597936 |
| RRS1         | NM_015169    | 69.63191953 | 16.58299034 | 0.003361406 | 4.198996569 |
| SIAH1        | NM_003031    | 106.2445312 | 3.189982491 | 4.00E-10    | 33.30567848 |
| RPL26        | NM_000987    | 110.4272878 | 11.45592492 | 4.38E-08    | 9.639316642 |
| NOA1         | NM_032313    | 98.46847084 | 3.972968417 | 1.77E-09    | 24.78460952 |
| SIPA1L3      | NM_015073    | 90.69241049 | 1.514786142 | 1.26E-08    | 59.8714287  |
| GNG12        | NM_018841    | 158.2033481 | 1.793150775 | 1.01E-15    | 88.22646168 |
| HIVEP2       | NM_006734    | 31.69369417 | 0.191211463 | 0.000810753 | 165.7520617 |
| ZBTB26       | NM_020924    | 64.18275656 | 0.687866331 | 5.11E-08    | 93.3070186  |
| RPS10-NUDT3  | NM_001202470 | 111.222656  | 2.919713884 | 1.14E-10    | 38.09368328 |
| IFT140       | NM_014714    | 64.4478793  | 1.62621971  | 3.03E-06    | 39.63048713 |
| FOXN3        | NM_001085471 | 75.34620525 | 0.52294445  | 3.86E-08    | 144.0807055 |
| CLMN         | NM_024734    | 51.42857143 | 1.068343323 | 8.72E-06    | 48.13861827 |
| NUP188       | NM_015354    | 175.3462052 | 1.773711199 | 7.49E-19    | 98.85837408 |
| DDX55        | NM_020936    | 167.0398994 | 3.208202359 | 6.41E-18    | 52.06650976 |
| SLC25A4      | NM_001151    | 146.2445312 | 2.277811498 | 1.35E-17    | 64.20396567 |
| IL10RA       | NM_001558    | 77.93822536 | 1.355585879 | 3.98E-09    | 57.49412604 |
| NUDT14       | NM_177533    | 97.14285714 | 5.648180841 | 7.28E-09    | 17.19896368 |
| NARFL        | NM_022493    | 70.42728775 | 6.564179898 | 1.24E-05    | 10.72903072 |
| RGPD8        | NM_001164463 | 91.42857143 | 0.595175254 | 1.97E-11    | 153.6162178 |
| DENND2C      | NM_001256404 | 115.0810825 | 0.457766155 | 1.65E-14    | 251.3970973 |
| SPAG7        | NM_004890    | 84.4478793  | 6.455356483 | 2.26E-07    | 13.08183049 |
| BMP7         | NM_001719    | 77.93822536 | 1.168068008 | 1.37E-07    | 66.72404758 |
| LARS2        | NM_015340    | 84.18275656 | 0.662865505 | 2.01E-09    | 126.9982461 |
| TMEM260      | NM_017799    | 87.03989941 | 0.698935693 | 2.07E-10    | 124.5320567 |
| UQCRQ        | NM_014402    | 169.6319195 | 18.80096249 | 1.95E-10    | 9.022512523 |
| HDAC1        | NM_004964    | 109.8970423 | 2.941875453 | 4.94E-11    | 37.35611654 |
| SNAPC3       | NM_001039697 | 86.50965393 | 2.285805261 | 1.07E-08    | 37.84646723 |
| ABTB2        | NM_145804    | 141.3256137 | 1.771968684 | 1.30E-13    | 79.75627049 |
| RNASEH2B     | NM_001142279 | 116.1415735 | 1.306607332 | 1.82E-12    | 88.88789355 |
| TTLL12       | NM_015140    | 102.8571429 | 6.146224926 | 1.41E-08    | 16.73501118 |
| POLRMT       | NM_005035    | 101.8558592 | 6.305185255 | 9.94E-09    | 16.1543008  |
| CMTM6        | NM_017801    | 166.5096539 | 4.21256656  | 5.70E-17    | 39.52688974 |
| BMP1         | NR_033404    | 77.93822536 | 2.607548277 | 1.09E-07    | 29.88946592 |
| NUPL2        | NM_007342    | 80.79536822 | 2.990664139 | 1.82E-07    | 27.01586152 |
| KCTD9        | NM_017634    | 63.1222656  | 2.126537553 | 2.75E-06    | 29.68311822 |
| B4GALT1      | NM_001497    | 146.2445312 | 1.999223778 | 2.43E-15    | 73.15065615 |
| ZKSCAN2      | NM_001012981 | 83.65251108 | 0.359887062 | 2.42E-11    | 232.4410069 |
| AEN          | NM_022767    | 67.30502215 | 8.468470226 | 0.000115726 | 7.947719052 |
| THRAP3       | NM_005119    | 152.2239396 | 2.734544433 | 3.55E-15    | 55.66702    |
| FARSA        | NM_004461    | 149.3667968 | 6.413605672 | 1.54E-13    | 23.28905212 |
| INPP5E       | NM_019892    | 112.4890624 | 5.701515953 | 3.46E-10    | 19.72967599 |
| ZNF672       | NM_024836    | 183.1222656 | 7.33236203  | 2.38E-17    | 24.97452592 |
| SRPR         | NM_001177842 | 73.28443061 | 9.758433247 | 6.65E-05    | 7.509856219 |
| CSTF2T       | NM_015235    | 123.6525111 | 1.169352069 | 4.17E-16    | 105.7444668 |
| PTRH1        | NM_001002913 | 92.75418513 | 6.285208786 | 3.74E-07    | 14.75753444 |
| MICALL2      | NM_182924    | 230.162165  | 2.166753336 | 5.64E-27    | 106.2244424 |
| CCDC101      | NM_138414    | 220.2651227 | 0.647843881 | 4.52E-30    | 339.9972268 |
| ADO          | NM_032804    | 89.63191953 | 10.37865394 | 3.45E-06    | 8.636179608 |
| EFCAB14      | NM_014774    | 56.40669621 | 1.010816547 | 7.91E-06    | 55.80309938 |
| AKAP10       | NM_007202    | 101.3256137 | 0.638793116 | 2.63E-12    | 158.6203907 |
| OSMR         | NM_001168355 | 97.93822536 | 1.316661944 | 1.57E-10    | 74.38372912 |

|            |              |             |             |             |             |
|------------|--------------|-------------|-------------|-------------|-------------|
| TUBA1B     | NM_006082    | 166.5096539 | 31.85184305 | 3.03E-08    | 5.227630114 |
| TRIP13     | NM_004237    | 92.75418513 | 1.498367242 | 2.96E-10    | 61.90350572 |
| PDCL3      | NM_024065    | 155.0810825 | 3.469168807 | 5.64E-16    | 44.70266255 |
| ZNF555     | NM_001172775 | 37.14285714 | 0.293892093 | 1.82E-05    | 126.382635  |
| HECA       | NM_016217    | 83.1222656  | 1.680352534 | 1.79E-08    | 49.46715878 |
| DDX20      | NM_007204    | 60.79536822 | 3.411868576 | 2.09E-05    | 17.81878958 |
| LOC93622   | NR_015433    | 83.65251108 | 15.20522568 | 0.000167267 | 5.501563266 |
| TTC23L     | NM_144725    | 86.77477667 | 0.409240055 | 2.87E-11    | 212.0388158 |
| NCAPD3     | NM_015261    | 153.0193079 | 1.164450253 | 7.29E-17    | 131.4090554 |
| ZFAND2A    | NM_182491    | 58.46847084 | 1.138076793 | 2.87E-07    | 51.37480283 |
| GGN        | NM_152657    | 57.14285714 | 11.28047695 | 0.001915523 | 5.065641939 |
| SOX13      | NM_005686    | 198.4684708 | 2.983497277 | 1.19E-20    | 66.52208882 |
| ATP5C1     | NM_001001973 | 121.8558592 | 4.175104341 | 4.56E-12    | 29.18630272 |
| TTC32      | NM_001008237 | 100.2651227 | 10.36164101 | 4.52E-07    | 9.676567892 |
| BBS10      | NM_024685    | 118.2033481 | 1.486143184 | 8.93E-15    | 79.53698496 |
| RPL7       | NM_000971    | 160.0592073 | 5.829951154 | 1.55E-15    | 27.45463951 |
| ZNF330     | NM_001292002 | 84.18275656 | 0.958588286 | 1.38E-10    | 87.8195131  |
| COX16      | NM_001204090 | 118.7335936 | 0.97609559  | 3.24E-14    | 121.6413585 |
| FAM220A    | NM_001037163 | 72.48906239 | 0.689366761 | 7.31E-09    | 105.1531151 |
| NOL9       | NM_024654    | 81.85585918 | 1.097974302 | 3.58E-09    | 74.55170764 |
| MED20      | NM_004275    | 104.9781248 | 1.275051838 | 3.05E-13    | 82.33243672 |
| ZNF213-AS1 | NR_110900    | 69.36679679 | 7.818922544 | 9.32E-05    | 8.871656728 |
| CIDCEP     | NR_002786    | 53.01930787 | 2.023902359 | 3.93E-06    | 26.19657397 |
| TMEM241    | NM_032933    | 98.73359358 | 0.525814736 | 9.46E-12    | 187.7725875 |
| C10orf111  | NM_153244    | 118.9987163 | 0.366097216 | 4.00E-14    | 325.0467665 |
| XRCC6BP1   | NM_033276    | 224.4478793 | 2.496769143 | 1.91E-26    | 89.8953273  |
| XPO1       | NM_003400    | 101.3256137 | 3.930560453 | 9.50E-09    | 25.7789226  |
| CCDC159    | NM_001080503 | 72.75418513 | 2.971679929 | 3.31E-07    | 24.48251053 |
| CAPN7      | NM_014296    | 169.6319195 | 0.467444732 | 2.02E-22    | 362.8919268 |
| YARS2      | NM_001040436 | 98.99871632 | 8.66038001  | 6.68E-08    | 11.43122082 |
| ZBED5-AS1  | NR_034137    | 129.8970423 | 0.044311425 | 4.81E-22    | 2931.457137 |
| ALG6       | NM_013339    | 159.2638391 | 0.365794919 | 4.51E-22    | 435.3910638 |
| C9orf89    | NM_032310    | 84.18275656 | 2.732708069 | 5.67E-08    | 30.80561642 |
| STT3B      | NM_178862    | 157.6731026 | 2.068890731 | 8.31E-16    | 76.21142105 |
| TTC33      | NM_012382    | 41.59073644 | 0.105999486 | 1.57E-06    | 392.3673402 |
| HIF1A-AS1  | NR_047116    | 167.0398994 | 2.414741866 | 2.52E-19    | 69.17505417 |
| RCCD1      | NM_033544    | 98.2033481  | 8.594885016 | 9.98E-08    | 11.42578963 |
| MPP5       | NM_001256550 | 98.2033481  | 1.603562348 | 1.29E-09    | 61.24074205 |
| CXCR4      | NM_003467    | 43.91763382 | 1.946729568 | 0.000198049 | 22.55969937 |
| IMPACT     | NM_018439    | 158.2033481 | 0.603098603 | 1.26E-21    | 262.31755   |
| CNOT11     | NM_017546    | 121.3256137 | 2.008664622 | 3.92E-13    | 60.40113036 |
| ARHGEF35   | NM_001003702 | 179.2638391 | 9.428464937 | 6.19E-16    | 19.01304616 |
| LENG8      | NM_052925    | 161.5907364 | 10.73615544 | 2.78E-13    | 15.05108019 |
| SDHB       | NM_003000    | 55.08108251 | 2.928904238 | 3.57E-05    | 18.80603736 |
| OLA1       | NM_001011708 | 101.060491  | 1.556292532 | 1.23E-09    | 64.93669338 |
| PSMD1      | NR_034059    | 83.91763382 | 1.455898038 | 4.92E-08    | 57.63977397 |
| OAF        | NM_178507    | 57.14285714 | 3.532416943 | 7.43E-05    | 16.17670226 |
| SRP54      | NM_003136    | 92.22393965 | 0.390950924 | 1.27E-12    | 235.8964619 |
| ECHS1      | NM_004092    | 66.24453119 | 1.108547783 | 4.12E-08    | 59.75793935 |
| MEGF8      | NM_001271938 | 136.1415735 | 0.768546056 | 3.67E-16    | 177.1417241 |
| DR1        | NM_001938    | 157.9382254 | 1.863550819 | 1.78E-18    | 84.75123067 |
| LOC145783  | NR_015419    | 69.89704227 | 4.175440756 | 8.78E-06    | 16.74003928 |
| ZSWIM1     | NM_080603    | 78.46847084 | 4.143619254 | 6.33E-07    | 18.93718173 |
| AP5M1      | NR_026895    | 49.89704227 | 2.16990861  | 7.95E-05    | 22.99499713 |
| LANCL2     | NM_018697    | 50.16216501 | 0.934079905 | 5.13E-06    | 53.70222051 |
| MTG1       | NM_138384    | 74.55083703 | 1.094479028 | 2.70E-08    | 68.11536366 |
| USP32      | NM_032582    | 55.61132799 | 0.864488683 | 4.74E-06    | 64.32857833 |
| OAZ1       | NM_004152    | 224.1827566 | 8.081584772 | 1.58E-21    | 27.73994988 |
| PDS5B      | NM_015032    | 54.81595977 | 0.345472115 | 2.44E-06    | 158.6697085 |
| CDH1       | NM_004360    | 177.9382254 | 2.144296795 | 5.07E-18    | 82.982088   |
| ZNF519     | NR_033354    | 60.79536822 | 0.926630881 | 3.85E-07    | 65.60904613 |
| DNAJC28    | NM_001040192 | 137.6731026 | 8.518704219 | 1.09E-11    | 16.16127278 |
| DGAT2      | NM_001253891 | 36.14157347 | 1.303416212 | 0.001420326 | 27.72834427 |
| ELOVL3     | NM_152310    | 51.22265597 | 5.506007823 | 0.000975277 | 9.303048165 |

|             |              |             |             |             |             |
|-------------|--------------|-------------|-------------|-------------|-------------|
| RRN3P2      | NR_003369    | 65.71428571 | 1.342609722 | 1.09E-06    | 48.94518835 |
| YIPF3       | NM_015388    | 101.8558592 | 4.759419667 | 8.27E-10    | 21.40089891 |
| DNPH1       | NM_006443    | 63.91763382 | 7.339396102 | 9.76E-05    | 8.708841018 |
| VPS26B      | NM_052875    | 140.7953682 | 1.556103558 | 7.48E-17    | 90.47943337 |
| MAN1A1      | NM_005907    | 163.9176338 | 1.55768436  | 3.25E-16    | 105.2316105 |
| TMEM223     | NM_001080501 | 175.3462052 | 36.43271958 | 2.19E-07    | 4.812877196 |
| MACC1       | NM_182762    | 22.85714286 | 0.034219293 | 0.001595149 | 667.9606928 |
| ADAMTS14    | NM_080722    | 46.24453119 | 1.734803203 | 0.000323004 | 26.65693211 |
| CTGF        | NM_001901    | 56.40669621 | 7.036407078 | 0.000281854 | 8.016406041 |
| POLG2       | NM_007215    | 131.222656  | 1.880399688 | 1.15E-15    | 69.78444893 |
| CACUL1      | NM_153810    | 50.16216501 | 2.506651636 | 9.12E-05    | 20.01162199 |
| LMNTD2      | NM_173573    | 123.6525111 | 7.313160488 | 1.23E-10    | 16.9082179  |
| GGCX        | NM_000821    | 75.08108251 | 11.24473516 | 5.66E-05    | 6.676998741 |
| UTP11L      | NM_016037    | 125.9794085 | 4.054704249 | 2.70E-12    | 31.06993771 |
| NOL4L       | NM_080616    | 37.40797988 | 1.707868158 | 0.001811178 | 21.9033183  |
| SDHAF1      | NM_001042631 | 113.2844306 | 25.43797049 | 0.000200258 | 4.45335962  |
| PPTC7       | NM_139283    | 38.46847084 | 2.224397438 | 0.002098063 | 17.29388381 |
| CLHC1       | NM_152385    | 57.93822536 | 0.321184876 | 1.58E-07    | 180.3890212 |
| TRNT1       | NM_182916    | 180.7953682 | 2.308151921 | 3.03E-20    | 78.32905911 |
| PLL         | NM_015993    | 57.40797988 | 1.253648464 | 5.78E-06    | 45.79272541 |
| SCYL1       | NM_001048218 | 78.2033481  | 5.50965943  | 3.21E-06    | 14.19386245 |
| ARID2       | NM_152641    | 42.38610466 | 0.506387477 | 6.16E-05    | 83.70290857 |
| LINC00888   | NR_038302    | 101.060491  | 2.485816614 | 2.34E-11    | 40.65484573 |
| CDK12       | NM_016507    | 109.8970423 | 0.341186289 | 1.51E-14    | 322.102751  |
| SYS1-DBNDD2 | NR_003189    | 88.10039037 | 3.086487182 | 1.04E-08    | 28.54390289 |
| SMIM13      | NM_001135575 | 95.08108251 | 0.336761868 | 2.21E-13    | 282.3392178 |
| ZNF443      | NM_005815    | 53.54955335 | 1.664470049 | 4.39E-06    | 32.17213394 |
| DGCR6       | NM_005675    | 101.8558592 | 5.003765753 | 1.72E-09    | 20.35584082 |
| MTHFD1      | NM_005956    | 41.3256137  | 2.495072245 | 0.001230968 | 16.56289263 |
| SHB         | NM_003028    | 134.8159598 | 1.814515476 | 3.47E-13    | 74.29860011 |
| FBXL8       | NM_018378    | 107.0398994 | 11.11590471 | 2.58E-07    | 9.629436578 |
| THOP1       | NM_003249    | 115.8764507 | 3.092945093 | 2.48E-11    | 37.46476165 |
| ALMS1P      | NR_003683    | 20.53024548 | 0.050173258 | 0.003404233 | 409.1870079 |
| CLCF1       | NM_001166212 | 55.08108251 | 5.970778835 | 0.000543786 | 9.225108487 |
| DGCR8       | NM_001190326 | 43.38738834 | 4.793473334 | 0.002765437 | 9.051346553 |
| ACTR8       | NM_022899    | 121.8558592 | 2.207892179 | 1.42E-13    | 55.19103711 |
| ACTR5       | NM_024855    | 104.4478793 | 1.109282878 | 9.58E-13    | 94.15801992 |
| RECQL       | NM_032941    | 57.7323099  | 0.825880723 | 3.84E-06    | 69.90393203 |
| NDUFV2      | NM_021074    | 167.3050222 | 2.606692203 | 1.63E-17    | 64.18288357 |
| NUAK2       | NM_030952    | 203.6525111 | 3.093132658 | 1.00E-22    | 65.84021236 |
| TSR2        | NM_058163    | 43.65251108 | 3.844081007 | 0.00074051  | 11.35577294 |
| KIAA1804    | NM_032435    | 177.4079799 | 0.539042893 | 1.42E-22    | 329.116629  |
| TLL2        | NM_012465    | 87.30502215 | 0.729204517 | 4.59E-10    | 119.726387  |
| PRKAA1      | NM_006251    | 80          | 1.263452112 | 1.70E-08    | 63.31858503 |
| CAT         | NM_001752    | 109.8970423 | 0.537003083 | 7.16E-14    | 204.6488105 |
| PFDN1       | NM_002622    | 55.34620525 | 0.79194416  | 1.65E-06    | 69.88649961 |
| MIA3        | NM_198551    | 60          | 3.086853924 | 1.13E-05    | 19.43726573 |
| DDX27       | NM_017895    | 58.46847084 | 2.084121951 | 9.44E-06    | 28.05424645 |
| LIN7C       | NM_018362    | 117.9382254 | 0.970219351 | 4.63E-16    | 121.5583107 |
| CERS4       | NM_024552    | 129.3667968 | 1.575789215 | 9.13E-14    | 82.09651112 |
| ARL6IP5     | NM_006407    | 57.14285714 | 2.513009181 | 9.65E-06    | 22.7388175  |
| LRRCS56     | NM_198075    | 79.26383906 | 2.045817756 | 7.79E-09    | 38.74433039 |
| CUEDC2      | NM_024040    | 109.8970423 | 14.53669741 | 3.81E-07    | 7.559973159 |
| NARS        | NM_004539    | 81.85585918 | 2.926867034 | 1.20E-08    | 27.96705769 |
| SOCS1       | NM_003745    | 174.550837  | 27.82461858 | 1.52E-08    | 6.273251744 |
| ITGB5       | NM_002213    | 46.50965393 | 2.898035798 | 0.000384683 | 16.04868165 |
| NKIRAS1     | NM_020345    | 127.0398994 | 1.393631579 | 5.33E-15    | 91.15744887 |
| ZNF286B     | NM_001145045 | 53.28443061 | 1.201037288 | 9.29E-06    | 44.36534247 |
| KPNA4       | NM_002268    | 69.89704227 | 0.695109916 | 3.06E-08    | 100.5553808 |
| LPP-AS2     | NR_036497    | 103.1222656 | 18.04732876 | 1.78E-05    | 5.713990529 |
| CENPT       | NM_025082    | 97.93822536 | 14.00372213 | 2.33E-06    | 6.993728127 |
| KBTBD8      | NM_032505    | 63.38738834 | 0.280599145 | 6.05E-09    | 225.9001477 |
| 7-Sep       | NM_001011553 | 63.65251108 | 0.416367581 | 1.33E-07    | 152.8757617 |
| OTUD7B      | NM_020205    | 137.6731026 | 1.421061547 | 1.63E-14    | 96.88046441 |

|              |              |             |             |             |             |
|--------------|--------------|-------------|-------------|-------------|-------------|
| CLUHP3       | NR_024034    | 64.18275656 | 4.865779918 | 3.43E-05    | 13.1906411  |
| CCDC130      | NM_030818    | 153.2844306 | 5.318088215 | 7.75E-15    | 28.82322075 |
| GSTP1        | NM_000852    | 129.6319195 | 26.58441768 | 3.42E-06    | 4.87623694  |
| MRPS26       | NM_030811    | 166.5096539 | 10.9533811  | 5.25E-13    | 15.20166717 |
| CINP         | NM_032630    | 124.1827566 | 0.712853723 | 2.15E-17    | 174.2051033 |
| YAEID1       | NM_020192    | 158.4684708 | 2.884335903 | 5.02E-18    | 54.94105963 |
| CDS1         | NM_001263    | 55.87645073 | 1.054371239 | 1.23E-06    | 52.99504449 |
| THOC6        | NM_001142350 | 115.3462052 | 18.55924503 | 2.85E-06    | 6.215026799 |
| HEATR2       | NR_075098    | 41.3256137  | 1.728902334 | 0.001069186 | 23.90280405 |
| NOP58        | NM_015934    | 144.4478793 | 4.057784618 | 7.26E-14    | 35.59771966 |
| ZNF800       | NM_176814    | 82.12098192 | 1.948347452 | 5.60E-09    | 42.1490437  |
| DIAPH1       | NM_005219    | 116.1415735 | 1.567055567 | 9.78E-12    | 74.11452146 |
| TMEM19       | NM_018279    | 156.1415735 | 0.94166028  | 1.95E-21    | 165.8151849 |
| SOWAHC       | NM_023016    | 157.9382254 | 7.701845266 | 7.09E-14    | 20.50654355 |
| LOC101928068 | NR_111907    | 118.2033481 | 12.71135241 | 5.31E-08    | 9.299037919 |
| TXNL1        | NR_024546    | 89.36679679 | 1.178338294 | 9.91E-10    | 75.84137531 |
| SDSL         | NM_138432    | 62.12098192 | 4.24966109  | 1.85E-05    | 14.61786731 |
| EIF2AK3      | NM_004836    | 75.61132799 | 0.692444258 | 5.87E-09    | 109.1948226 |
| PDXDC2P      | NR_003610    | 95.87645073 | 1.182085897 | 7.44E-10    | 81.1078543  |
| BET1         | NM_005868    | 69.63191953 | 0.739772429 | 6.65E-09    | 94.12613507 |
| FLJ30679     | NR_026674    | 122.1209819 | 12.21287069 | 3.31E-08    | 9.99936747  |
| LRRRC8A      | NM_019594    | 112.7541851 | 2.926577259 | 1.72E-11    | 38.52766394 |
| PMVK         | NM_006556    | 56.40669621 | 9.688749111 | 0.001457987 | 5.821876029 |
| TYMS         | NM_001071    | 107.0398994 | 10.38141849 | 5.56E-08    | 10.31072002 |
| MRPS14       | NR_037606    | 50.42728775 | 3.872276588 | 0.000183805 | 13.02264614 |
| EIF2AK4      | NM_001013703 | 164.713002  | 1.100607221 | 1.01E-17    | 149.6564796 |
| SLX4IP       | NM_001009608 | 94.81595977 | 0.257861162 | 1.54E-11    | 367.701592  |
| EVPL         | NM_001988    | 140.32433   | 5.746533693 | 1.28E-12    | 24.41895193 |
| FANCL        | NM_018062    | 157.6731026 | 0.487709828 | 2.13E-20    | 323.2928551 |
| MIR17HG      | NR_027349    | 91.42857143 | 9.31117161  | 1.35E-06    | 9.819233847 |
| SFMBT1       | NM_016329    | 109.6319195 | 0.775079679 | 2.28E-12    | 141.4459991 |
| ERII         | NM_153332    | 64.97812478 | 0.860021533 | 2.79E-07    | 75.55406726 |
| LOC101928438 | NR_109802    | 129.8970423 | 0.287800629 | 1.96E-15    | 451.3438436 |
| ATM          | NM_000051    | 87.57014489 | 0.928194652 | 6.21E-10    | 94.34459105 |
| SIX4         | NM_017420    | 57.40797988 | 6.802509134 | 0.000409927 | 8.439235986 |
| M6PR         | NM_001207024 | 140.5302455 | 7.423920305 | 1.40E-12    | 18.92938498 |
| DIP2B        | NM_173602    | 97.93822536 | 0.659966141 | 8.64E-11    | 148.3988636 |
| B3GNT4       | NM_030765    | 137.4079799 | 25.5094821  | 3.67E-07    | 5.386545259 |
| SLC38A2      | NM_018976    | 141.3256137 | 22.20657595 | 6.68E-08    | 6.36413349  |
| PFDN4        | NM_002623    | 61.06049096 | 1.475506466 | 6.50E-07    | 41.38273358 |
| COX5A        | NM_004255    | 144.1827566 | 3.265088658 | 4.47E-15    | 44.15891012 |
| FAHD2A       | NM_016044    | 141.3256137 | 4.000301003 | 1.99E-14    | 35.32874491 |
| AARS2        | NM_020745    | 116.6718189 | 1.75631815  | 2.37E-13    | 66.42977466 |
| B3GALNT2     | NM_001277155 | 181.3256137 | 2.169431955 | 5.19E-20    | 83.58207009 |
| HUS1         | NM_004507    | 109.1016741 | 1.783995738 | 6.02E-13    | 61.15579298 |
| CBL          | NM_005188    | 151.9588169 | 0.702155183 | 3.09E-18    | 216.4177101 |
| CBX3P2       | NR_033754    | 143.6525111 | 3.193349239 | 5.64E-16    | 44.98490467 |
| RSBN1L       | NM_198467    | 118.4684708 | 1.357788891 | 4.65E-12    | 87.2510238  |
| NAPRT        | NM_001286829 | 144.4478793 | 19.87692187 | 7.09E-09    | 7.267115112 |
| GINM1        | NM_138785    | 115.3462052 | 1.808976874 | 5.56E-13    | 63.7632282  |
| ASF1A        | NM_014034    | 77.67310262 | 5.109450933 | 6.26E-07    | 15.20184921 |
| SETX         | NM_015046    | 124.9781248 | 0.918651273 | 1.09E-14    | 136.0452312 |
| CYP51A1-AS1  | NR_122109    | 100.7953682 | 0.949599299 | 3.92E-11    | 106.1451586 |
| HACE1        | NR_104424    | 106.5096539 | 0.548983288 | 1.77E-12    | 194.0125616 |
| TMOD2        | NM_014548    | 85.71428571 | 1.670355706 | 1.46E-08    | 51.31498962 |
| ANKRD13C     | NM_030816    | 126.5096539 | 1.427771499 | 7.73E-13    | 88.60637293 |
| PSMD5        | NM_001270427 | 108.3655131 | 0.927929453 | 3.17E-13    | 116.78206   |
| LINC01136    | NR_034151    | 138.2033481 | 2.197843626 | 1.21E-16    | 62.88133808 |
| ARL4D        | NM_001661    | 98.46847084 | 10.73829375 | 2.85E-06    | 9.169843287 |
| FKBP10       | NM_021939    | 67.57014489 | 8.894357381 | 0.00011682  | 7.596967605 |
| SLC39A14     | NM_001135153 | 59.26383906 | 1.497526869 | 7.33E-06    | 39.5744746  |
| IRF2BP1      | NM_015649    | 109.1016741 | 17.66581226 | 8.60E-06    | 6.175865136 |
| INTS4        | NM_033547    | 36.14157347 | 0.492334124 | 0.000218032 | 73.40862976 |
| TRADD        | NM_003789    | 106.5096539 | 12.44997781 | 2.18E-07    | 8.55500753  |

|              |              |             |             |             |             |
|--------------|--------------|-------------|-------------|-------------|-------------|
| PEAK1        | NM_024776    | 120.5302455 | 0.025923024 | 7.65E-19    | 4649.544251 |
| NUDCD2       | NM_145266    | 173.5495533 | 4.766698716 | 4.51E-18    | 36.40875241 |
| AMER1        | NM_152424    | 51.95881691 | 1.160974068 | 1.69E-05    | 44.75450259 |
| SAV1         | NM_021818    | 153.2844306 | 0.42386139  | 2.32E-21    | 361.6381068 |
| GABPB1       | NM_002041    | 121.8558592 | 0.986974102 | 2.27E-13    | 123.4640899 |
| C5orf28      | NM_022483    | 136.1415735 | 0.256910972 | 1.02E-19    | 529.9173195 |
| NCBP1        | NM_002486    | 77.93822536 | 4.74440717  | 1.57E-06    | 16.42738968 |
| RELB         | NM_006509    | 42.85714286 | 1.050290734 | 0.000306025 | 40.80502805 |
| LOC100288974 | NR_033857    | 33.01930787 | 1.848198114 | 0.003104586 | 17.86567555 |
| DNAJC17      | NM_018163    | 109.3667968 | 2.464605226 | 3.11E-11    | 44.37497561 |
| ANKRD50      | NM_001167882 | 167.0398994 | 1.221710703 | 4.30E-19    | 136.7262307 |
| LOC100130987 | NR_024469    | 80.79536822 | 5.918696248 | 1.24E-06    | 13.65087256 |
| MTHFD2       | NR_027405    | 223.6525111 | 6.716137634 | 2.85E-21    | 33.30076351 |
| GADD45B      | NM_015675    | 161.5907364 | 23.71029844 | 5.56E-09    | 6.815213095 |
| SPSB1        | NM_025106    | 37.40797988 | 0.639750446 | 0.000200386 | 58.47276871 |
| ARPC5L       | NM_030978    | 143.6525111 | 5.519614545 | 9.22E-14    | 26.02582298 |
| INADL        | NM_176877    | 105.9794085 | 0.254877097 | 4.60E-12    | 415.8059307 |
| FUCA2        | NM_032020    | 42.6512274  | 3.228547783 | 0.000396103 | 13.21065391 |
| MANBAL       | NM_001003897 | 164.713002  | 3.392003479 | 6.58E-17    | 48.55920788 |
| COX20        | NM_198076    | 97.40797988 | 15.60519289 | 4.89E-06    | 6.242023445 |
| CCDC18       | NM_206886    | 124.713002  | 0.81985129  | 8.57E-15    | 152.1166139 |
| LINC00467    | NR_026761    | 137.6731026 | 1.726279002 | 9.35E-15    | 79.7513626  |
| RRAGA        | NM_006570    | 123.9176338 | 11.75378738 | 3.56E-08    | 10.54278334 |
| CACNB4       | NM_001145798 | 26.50965393 | 0.163809094 | 0.004038595 | 161.8326146 |
| SUPT6H       | NM_003170    | 62.38610466 | 1.426123977 | 2.39E-06    | 43.74521827 |
| RNF43        | NM_017763    | 59.79408454 | 2.712480533 | 1.20E-05    | 22.04406034 |
| DCAF15       | NM_138353    | 70.42728775 | 2.729929064 | 3.31E-07    | 25.79821164 |
| SLC27A3      | NM_024330    | 84.4478793  | 20.16025024 | 0.000592596 | 4.188830907 |
| DNAJC27-AS1  | NR_034113    | 123.3873883 | 0.987950729 | 2.04E-13    | 124.8922489 |
| SLC35A4      | NM_080670    | 112.2239396 | 10.60076199 | 5.66E-08    | 10.5864031  |
| RFC1         | NM_001204747 | 70.16216501 | 1.033221461 | 2.98E-08    | 67.90622112 |
| GUF1         | NM_021927    | 130.162165  | 3.019520169 | 2.15E-13    | 43.10690365 |
| RPS11        | NM_001015    | 137.9382254 | 27.03028194 | 7.67E-07    | 5.103099763 |
| KIAA1161     | NM_020702    | 113.2844306 | 1.237675295 | 1.75E-14    | 91.53000876 |
| JAG1         | NM_000214    | 188.8365513 | 5.908319997 | 4.44E-17    | 31.96112455 |
| NMD3         | NM_015938    | 115.0810825 | 3.087830413 | 6.58E-11    | 37.26923669 |
| RPL24        | NM_000986    | 152.2239396 | 10.07338958 | 3.80E-12    | 15.11149137 |
| PKD2         | NM_000297    | 97.40797988 | 0.909352822 | 1.48E-11    | 107.1179167 |
| HEYL         | NM_014571    | 135.8764507 | 2.232677133 | 2.54E-15    | 60.85808319 |
| FBXL3        | NM_012158    | 123.3873883 | 1.609692758 | 1.51E-14    | 76.65275731 |
| COX10        | NM_001303    | 112.2239396 | 0.029833421 | 1.04E-18    | 3761.685275 |
| DCUN1D2      | NM_001014283 | 166.7747767 | 3.159445111 | 1.30E-16    | 52.78609718 |
| GAL          | NM_015973    | 93.28443061 | 3.112359835 | 1.15E-09    | 29.97225113 |
| NPC1         | NM_000271    | 120.32433   | 3.814426139 | 7.39E-11    | 31.54454317 |
| ARHGFE37     | NM_001001669 | 83.91763382 | 1.745586763 | 2.47E-08    | 48.07416945 |
| C10orf76     | NM_024541    | 163.4465956 | 1.106318042 | 1.00E-17    | 147.739248  |
| UBASH3B      | NM_032873    | 167.5701449 | 1.974430701 | 1.12E-16    | 84.870107   |
| XYLB         | NM_005108    | 98.73359358 | 0.489185868 | 7.70E-13    | 201.8324733 |
| PPIL1        | NM_016059    | 109.6319195 | 1.522621529 | 6.96E-13    | 72.00208156 |
| BCL7A        | NM_020993    | 48.83655131 | 2.173698068 | 0.000128161 | 22.46703534 |
| CDC37L1      | NM_017913    | 164.713002  | 1.341207365 | 1.85E-20    | 122.8094971 |
| GPATCH11     | NM_174931    | 63.91763382 | 0.854406171 | 1.09E-07    | 74.80942433 |
| LRWD1        | NM_152892    | 149.6319195 | 9.00025479  | 1.01E-12    | 16.62529817 |
| CTC-338M12.4 | NR_109909    | 141.060491  | 11.67549617 | 5.63E-11    | 12.08175558 |
| NPDC1        | NM_015392    | 112.7541851 | 3.481711717 | 8.80E-12    | 32.38469876 |
| RBBP9        | NM_006606    | 133.8146761 | 2.974213541 | 2.75E-14    | 44.99161686 |
| CTBS         | NM_004388    | 211.9588169 | 3.428849542 | 2.93E-23    | 61.81630728 |
| ANP32B       | NM_006401    | 72.48906239 | 5.441598834 | 5.47E-06    | 13.32128012 |
| HSPA12A      | NM_025015    | 174.8159598 | 2.808889339 | 8.95E-18    | 62.23668457 |
| SMYD5        | NM_006062    | 124.1827566 | 3.0850323   | 3.00E-13    | 40.25330838 |
| PCOLCE2      | NM_013363    | 88.83655131 | 1.708661103 | 8.27E-09    | 51.99190825 |
| APPBP2       | NM_006380    | 233.8146761 | 1.798855323 | 3.34E-25    | 129.9797005 |
| PRKAB1       | NM_006253    | 102.1209819 | 4.756823542 | 3.72E-09    | 21.4683141  |
| SLC7A5       | NM_003486    | 291.9588169 | 5.69660142  | 3.09E-28    | 51.25140332 |

|              |              |             |             |             |             |
|--------------|--------------|-------------|-------------|-------------|-------------|
| NUMBL        | NM_004756    | 89.10167405 | 5.853186641 | 8.42E-08    | 15.22276317 |
| CRACR2A      | NM_032680    | 93.01930787 | 0.465400668 | 1.64E-11    | 199.8693047 |
| RNF139       | NM_007218    | 161.8558592 | 6.675950028 | 9.81E-15    | 24.24461814 |
| THUMPD1      | NM_017736    | 67.03989941 | 4.248928273 | 3.49E-06    | 15.77807275 |
| MGME1        | NM_052865    | 64.4478793  | 2.047703849 | 7.59E-07    | 31.47324225 |
| C17orf59     | NM_017622    | 74.34492157 | 6.23816965  | 7.04E-06    | 11.91774603 |
| LOC100288846 | NR_038935    | 72.75418513 | 2.874711812 | 3.59E-06    | 25.30834041 |
| TIMM17A      | NM_006335    | 111.222656  | 2.566691151 | 8.46E-12    | 43.33308896 |
| SEC61A1      | NM_013336    | 137.9382254 | 7.453116251 | 4.35E-12    | 18.50745657 |
| PABPC1L      | NM_001124756 | 183.3873883 | 2.267451278 | 7.98E-20    | 80.87820458 |
| ATP1A3       | NM_001256214 | 121.060491  | 0.532998245 | 5.27E-16    | 227.1311251 |
| GNB2L1       | NM_006098    | 144.9781248 | 15.68172179 | 7.59E-10    | 9.245038694 |
| REEP6        | NM_138393    | 133.0193079 | 6.927273679 | 7.32E-12    | 19.20225965 |
| PREP         | NM_002726    | 140.2651227 | 1.903238245 | 6.82E-14    | 73.69814215 |
| MEMO1        | NM_015955    | 54.81595977 | 0.75173635  | 3.56E-06    | 72.91912888 |
| EFNB1        | NM_004429    | 95.08108251 | 2.102616577 | 4.45E-10    | 45.22036188 |
| CCS          | NM_005125    | 227.0398994 | 4.461984242 | 7.13E-24    | 50.88316926 |
| TNKS2        | NM_025235    | 138.7335936 | 1.964038615 | 1.74E-14    | 70.63689713 |
| IGF1R        | NM_001291858 | 40.53024548 | 1.112610607 | 0.000178615 | 36.42805957 |
| LOC100507250 | NR_038930    | 91.95881691 | 0.808727945 | 2.41E-12    | 113.7079749 |
| RAD51AP1     | NM_006479    | 37.67310262 | 1.489197408 | 0.00116542  | 25.29758809 |
| BAG2         | NM_004282    | 152.4890624 | 6.580765522 | 1.44E-13    | 23.1719337  |
| BRAP         | NM_006768    | 95.87645073 | 1.647611989 | 3.42E-10    | 58.19115869 |
| SGPL1        | NM_003901    | 71.69369417 | 2.862590536 | 8.37E-07    | 25.04503989 |
| KRTCAP2      | NM_173852    | 97.67310262 | 12.60191309 | 2.50E-06    | 7.750656737 |
| CERK         | NM_022766    | 100.2651227 | 0.229244472 | 1.07E-14    | 437.3720415 |
| INO80E       | NM_173618    | 103.3873883 | 5.103133939 | 1.59E-09    | 20.25958745 |
| SLC25A30-AS1 | NR_047031    | 115.611328  | 8.975504482 | 1.39E-08    | 12.88076099 |
| LOC100133091 | NR_029411    | 94.55083703 | 2.98440188  | 4.21E-09    | 31.68167051 |
| NARS2        | NM_001243251 | 101.060491  | 0.572149896 | 1.11E-11    | 176.6328922 |
| PIGS         | NM_033198    | 131.6936942 | 4.984366066 | 5.48E-12    | 26.42135277 |
| ANKRD36B     | NM_025190    | 109.1016741 | 0.848090268 | 7.86E-13    | 128.6439405 |
| SRP14        | NM_003134    | 121.3256137 | 3.575153059 | 7.38E-13    | 33.93578169 |
| ISY1         | NM_001199469 | 46.77477667 | 0.242821094 | 1.33E-06    | 192.6306152 |
| PSMF1        | NM_006814    | 129.6319195 | 0.990631711 | 1.10E-14    | 130.8578335 |
| WWTR1-AS1    | NR_040250    | 155.611328  | 7.39231774  | 5.06E-14    | 21.05041118 |
| ADCK3        | NM_020247    | 120.7953682 | 0.491158788 | 2.04E-16    | 245.9395436 |
| PPP2CA       | NM_002715    | 75.08108251 | 2.974910761 | 2.09E-07    | 25.2380957  |
| TYK2         | NM_003331    | 123.9176338 | 0.265268712 | 6.81E-18    | 467.1400288 |
| ACYP2        | NM_138448    | 78.73359358 | 0.193700695 | 5.61E-10    | 406.4703729 |
| SUMO2        | NM_006937    | 99.26383906 | 4.678694912 | 1.41E-09    | 21.21613846 |
| HCFC2        | NM_013320    | 115.0810825 | 0.328607767 | 1.17E-16    | 350.2080417 |
| NUTF2        | NM_005796    | 89.36679679 | 5.23988091  | 7.26E-08    | 17.05511982 |
| PDX1         | NM_000209    | 77.67310262 | 3.273992995 | 2.28E-07    | 23.7242727  |
| TCEB3        | NM_003198    | 126.7747767 | 5.75253332  | 3.62E-11    | 22.03807777 |
| EXOSC8       | NM_181503    | 93.28443061 | 3.984893642 | 7.42E-09    | 23.40951578 |
| KBTBD6       | NM_152903    | 129.6319195 | 3.264235883 | 4.07E-14    | 39.71279166 |
| TUBE1        | NM_016262    | 132.7541851 | 2.187934329 | 1.51E-14    | 60.67558034 |
| LOC403323    | NR_122076    | 26.50965393 | 0.147283234 | 0.001095033 | 179.9909817 |
| TUBA1C       | NM_032704    | 255.611328  | 14.52753923 | 1.22E-20    | 17.59495011 |
| PRMT9        | NM_138364    | 64.18275656 | 1.144077924 | 2.12E-06    | 56.09998693 |
| DBIL5P       | NR_024120    | 51.95881691 | 2.921681197 | 7.64E-05    | 17.78387627 |
| PROSER2      | NM_153256    | 138.2033481 | 0.667754412 | 9.77E-17    | 206.9673304 |
| SLFN5        | NM_144975    | 155.0810825 | 2.202376496 | 1.16E-16    | 70.4153367  |
| FCF1         | NM_015962    | 48.83655131 | 1.480828355 | 5.97E-05    | 32.97921136 |
| ZNF862       | NM_001099220 | 115.611328  | 3.323865612 | 6.92E-11    | 34.78219082 |
| DUSP23       | NM_017823    | 87.03989941 | 3.245084817 | 5.64E-08    | 26.82207225 |
| CYBRD1       | NM_001256909 | 106.2445312 | 2.710831026 | 6.47E-11    | 39.19260559 |
| BOLA1        | NM_016074    | 84.4478793  | 12.44514615 | 0.000229562 | 6.785607683 |
| DLG5         | NM_004747    | 38.2033481  | 0.544808579 | 0.000247198 | 70.12251561 |
| CDC42EP2     | NM_006779    | 186.7747767 | 5.165364962 | 6.66E-19    | 36.15906679 |
| PTGER4       | NM_000958    | 123.9176338 | 2.077977391 | 6.51E-14    | 59.63377386 |
| LOC400684    | NR_046201    | 114.550837  | 4.356224729 | 2.50E-11    | 26.29589706 |
| ISL1         | NM_002202    | 92.22393965 | 3.867539862 | 4.65E-09    | 23.8456339  |



|              |              |             |             |             |             |
|--------------|--------------|-------------|-------------|-------------|-------------|
| MTX2         | NM_006554    | 157.6731026 | 1.548646263 | 8.75E-17    | 101.8135041 |
| TNFRSF21     | NM_014452    | 155.611328  | 1.77929276  | 4.96E-16    | 87.45684323 |
| FBXL16       | NM_153350    | 78.2033481  | 12.42268164 | 9.74E-05    | 6.295206653 |
| PSMC1        | NM_002802    | 81.59073644 | 4.797190434 | 1.47E-07    | 17.00802534 |
| FAM188A      | NM_024948    | 117.4079799 | 0.172101978 | 4.14E-17    | 682.2000626 |
| C20orf194    | NM_001009984 | 44.71300204 | 0.094628591 | 4.25E-06    | 472.5104896 |
| AP1M1        | NM_001130524 | 58.73359358 | 1.305994612 | 4.21E-06    | 44.97230926 |
| VPS37C       | NM_017966    | 89.63191953 | 3.462905432 | 5.85E-08    | 25.8834442  |
| TWISTNB      | NM_001002926 | 138.7335936 | 0.159279286 | 2.19E-23    | 871.0083819 |
| FAM229B      | NM_001033564 | 87.30502215 | 0.990578517 | 3.22E-11    | 88.13538821 |
| FAM32A       | NM_014077    | 39.79408454 | 2.814711888 | 0.001597489 | 14.13788911 |
| LOC100147773 | NR_125374    | 96.40669621 | 7.124927032 | 3.55E-08    | 13.53090295 |
| U2SURP       | NM_001080415 | 47.30502215 | 0.319182896 | 2.51E-06    | 148.2066327 |
| LRRC73       | NM_001012974 | 88.83655131 | 8.973010201 | 1.89E-06    | 9.900417955 |
| FUT2         | NM_001097638 | 106.7747767 | 8.930975727 | 1.95E-08    | 11.95555558 |
| KDSR         | NM_002035    | 169.1016741 | 1.937415264 | 7.49E-19    | 87.28210066 |
| MEA1         | NM_014623    | 105.9794085 | 25.66267451 | 0.000377672 | 4.129710191 |
| CCDC136      | NM_001201372 | 97.93822536 | 2.027214323 | 2.39E-10    | 48.31172721 |
| TONSL        | NM_013432    | 208.8365513 | 8.239410767 | 2.79E-19    | 25.34605413 |
| FLJ37035     | NR_033847    | 142.3861047 | 2.209843571 | 1.80E-16    | 64.43266236 |
| VTI1A        | NM_145206    | 213.8146761 | 1.026001941 | 1.06E-22    | 208.3959762 |
| INPP1        | NM_002194    | 76.14157347 | 1.534197619 | 2.90E-08    | 49.62957347 |
| PYCRL        | NM_023078    | 134.8159598 | 13.03712904 | 8.70E-10    | 10.34092394 |
| IRF2BPL      | NM_024496    | 98.46847084 | 18.31941078 | 4.74E-05    | 5.375089409 |
| SBF2-AS1     | NR_036485    | 81.59073644 | 2.223822321 | 3.36E-08    | 36.68941339 |
| MKLN1-AS     | NR_125364    | 44.97812478 | 1.273708323 | 8.28E-05    | 35.31273524 |
| MRPL45P2     | NR_033934    | 69.36679679 | 0.969777237 | 3.01E-07    | 71.52858839 |
| KCTD10       | NM_031954    | 103.6525111 | 2.499109807 | 6.85E-11    | 41.475773   |
| TGFB1        | NM_000660    | 152.2239396 | 5.080682317 | 6.91E-14    | 29.96131821 |
| DNAJC30      | NM_032317    | 98.2033481  | 2.516312315 | 1.69E-10    | 39.02669295 |
| GRIPAP1      | NM_020137    | 63.1222656  | 1.874368588 | 2.18E-06    | 33.676549   |
| MAK16        | NM_032509    | 57.20206442 | 1.714297755 | 3.84E-06    | 33.36763654 |
| PWP2         | NM_005049    | 113.0193079 | 1.621700563 | 3.09E-13    | 69.69184721 |
| IRF7         | NM_001572    | 153.8146761 | 17.52000324 | 4.71E-10    | 8.779374864 |
| IPPK         | NM_022755    | 71.22265597 | 1.467502212 | 4.05E-07    | 48.53325288 |
| EEA1         | NM_003566    | 67.30502215 | 0.374452947 | 4.15E-08    | 179.7422687 |
| NUDT5        | NM_014142    | 98.46847084 | 4.546476247 | 9.25E-09    | 21.65819538 |
| C1orf213     | NR_033690    | 150.4272878 | 21.53069118 | 9.54E-09    | 6.986644623 |
| LPPR2        | NM_001170635 | 137.6731026 | 0.361550382 | 1.57E-20    | 380.7853888 |
| LSM3         | NM_014463    | 29.89704227 | 0.409997603 | 0.00055061  | 72.9200417  |
| KLHDC2       | NM_014315    | 135.3462052 | 6.870857986 | 3.58E-12    | 19.69858866 |
| USP47        | NM_001282659 | 135.611328  | 1.459481968 | 1.47E-13    | 92.91743988 |
| MBTPS1       | NM_003791    | 124.9781248 | 0.401025933 | 4.54E-17    | 311.6459923 |
| LOXL4        | NM_032211    | 38.99871632 | 2.836924517 | 0.000831882 | 13.74682904 |
| C9orf156     | NM_016481    | 95.34620525 | 2.971541008 | 3.40E-09    | 32.0864511  |
| KANK2        | NM_001136191 | 131.9588169 | 2.291593742 | 3.04E-14    | 57.58386162 |
| CUL5         | NM_003478    | 61.06049096 | 0.347429555 | 2.00E-07    | 175.749271  |
| C15orf39     | NM_015492    | 200.7953682 | 4.629960014 | 4.20E-21    | 43.36870461 |
| RPL32P3      | NR_003111    | 52.48906239 | 6.491074558 | 0.001440558 | 8.08634409  |
| LOC220729    | NR_003266    | 38.2033481  | 2.112340431 | 0.001109099 | 18.08579126 |
| ZNF18        | NM_144680    | 172.4890624 | 0.87414249  | 1.05E-23    | 197.3237366 |
| CHUK         | NM_001278    | 127.8352676 | 3.919273557 | 5.86E-12    | 32.61708216 |
| ESD          | NM_001984    | 135.0810825 | 2.364181828 | 5.68E-15    | 57.13650317 |
| BTN2A3P      | NR_027795    | 58.2033481  | 2.872617149 | 2.38E-05    | 20.26143586 |
| PJA1         | NM_001032396 | 86.24453119 | 3.478635783 | 8.08E-09    | 24.79263038 |
| PMM2         | NM_000303    | 92.75418513 | 2.883134432 | 5.24E-09    | 32.17130082 |
| TICRR        | NM_152259    | 69.89704227 | 0.921587172 | 2.96E-08    | 75.84420051 |
| ACTR3C       | NM_001164458 | 38.46847084 | 0.012837006 | 1.52E-06    | 2996.685576 |
| ZC3HC1       | NM_016478    | 106.7747767 | 0.89662659  | 1.51E-12    | 119.0849991 |
| FAM103A1     | NM_031452    | 115.0810825 | 1.713770601 | 2.46E-14    | 67.15080911 |
| CYB5R1       | NM_016243    | 72.48906239 | 5.028487262 | 2.30E-06    | 14.41567983 |
| WDR77        | NM_024102    | 71.95881691 | 0.244757761 | 3.84E-11    | 294.000144  |
| MSL3P1       | NR_024322    | 118.4684708 | 10.90512857 | 1.33E-08    | 10.86355562 |
| PLXNB2       | NM_012401    | 64.18275656 | 7.539973227 | 0.000184198 | 8.512332156 |

|              |              |             |             |             |             |
|--------------|--------------|-------------|-------------|-------------|-------------|
| SLC48A1      | NM_017842    | 117.9382254 | 8.687781795 | 9.70E-10    | 13.57518273 |
| RIN3         | NM_024832    | 67.57014489 | 0.688545423 | 9.76E-08    | 98.13462212 |
| ASB1         | NM_001040445 | 115.611328  | 3.724495434 | 6.41E-11    | 31.04080272 |
| NT5DC3       | NM_001031701 | 134.550837  | 1.285579195 | 2.31E-14    | 104.6616479 |
| SLC6A17      | NM_001010898 | 152.4890624 | 0.962031457 | 1.14E-17    | 158.5073557 |
| CTDSP2       | NM_005730    | 69.10167405 | 3.909926442 | 7.26E-06    | 17.6733949  |
| ADPRHL1      | NM_199162    | 120.5302455 | 1.137497358 | 2.11E-14    | 105.9609015 |
| TRIM28       | NM_005762    | 134.550837  | 8.816588752 | 6.78E-11    | 15.26109937 |
| C15orf56     | NM_001039905 | 85.24324752 | 10.12911307 | 1.83E-05    | 8.415667484 |
| SMG5         | NM_015327    | 189.3667968 | 3.265480605 | 2.76E-19    | 57.99048279 |
| EIF2S2       | NM_003908    | 115.8764507 | 6.801099641 | 7.06E-10    | 17.03789929 |
| FUK          | NM_145059    | 118.2033481 | 5.969397579 | 6.34E-10    | 19.80155393 |
| GALNS        | NM_000512    | 186.5096539 | 3.608139393 | 2.83E-18    | 51.69136599 |
| XAB2         | NM_020196    | 61.06049096 | 6.048114068 | 0.000148198 | 10.09579024 |
| NDUFA6-AS1   | NR_034118    | 92.22393965 | 0.349725875 | 2.45E-13    | 263.7035069 |
| ZBTB40       | NM_014870    | 49.63191953 | 0.637802759 | 8.90E-06    | 77.81703482 |
| ERCC6        | NM_000124    | 126.5096539 | 0.489871802 | 5.64E-16    | 258.2505331 |
| IDH3A        | NM_005530    | 130.6924105 | 1.837641053 | 1.51E-15    | 71.11966197 |
| ULBP2        | NM_025217    | 92.48906239 | 2.76781635  | 3.16E-10    | 33.41589567 |
| LAMB2        | NM_002292    | 44.4478793  | 3.877509748 | 0.000868564 | 11.46299615 |
| UBE2D4       | NM_015983    | 192.7541851 | 3.184073935 | 5.61E-20    | 60.53696901 |
| CAPNS1       | NM_001749    | 149.8970423 | 8.563272806 | 2.12E-12    | 17.50464404 |
| AGPAT6       | NM_178819    | 170.162165  | 2.448159957 | 2.42E-18    | 69.50614667 |
| GOLT1A       | NM_198447    | 24.4478793  | 0.629284204 | 0.001747383 | 38.85029873 |
| BUB1B        | NM_001211    | 84.4478793  | 0.310792823 | 1.10E-11    | 271.7175981 |
| SMU1         | NM_018225    | 64.71300204 | 2.028019357 | 1.45E-06    | 31.90945975 |
| DECR2        | NM_020664    | 97.40797988 | 1.114941396 | 7.52E-12    | 87.36600888 |
| SMAD4        | NM_005359    | 131.9588169 | 0.593745542 | 2.53E-17    | 222.248097  |
| TATDN2       | NM_014760    | 182.1209819 | 1.674512612 | 1.34E-21    | 108.7605913 |
| NKD2         | NM_033120    | 34.28571429 | 0.622858383 | 0.000204298 | 55.04576192 |
| RUSC1-AS1    | NM_001039517 | 135.3462052 | 25.3334843  | 5.86E-07    | 5.342581528 |
| POLR2J       | NM_006234    | 90.16216501 | 2.57879561  | 7.75E-10    | 34.96289688 |
| GNS          | NM_002076    | 72.48906239 | 0.901927913 | 1.34E-07    | 80.37123734 |
| TAX1BP3      | NM_014604    | 167.3050222 | 22.06944722 | 2.90E-10    | 7.580843349 |
| TMTC2        | NM_152588    | 66.50965393 | 0.074096477 | 3.38E-08    | 897.6088527 |
| LMAN2        | NM_006816    | 152.7541851 | 3.176013092 | 6.42E-16    | 48.09620764 |
| CNPPD1       | NM_015680    | 112.4890624 | 4.645019496 | 4.89E-11    | 24.21713461 |
| ACOT8        | NM_005469    | 106.2445312 | 1.627455104 | 8.10E-13    | 65.28261882 |
| FBF1         | NM_001080542 | 241.5907364 | 0.53065212  | 8.44E-36    | 455.2714056 |
| USP24        | NM_015306    | 121.3256137 | 0.879008075 | 1.59E-13    | 138.0255962 |
| LYRM5        | NM_001001660 | 115.3462052 | 7.852226559 | 1.65E-09    | 14.68961757 |
| PRIM1        | NM_000946    | 89.89704227 | 2.194633638 | 1.19E-09    | 40.96220923 |
| FAM96B       | NR_024525    | 113.0193079 | 5.259468921 | 1.36E-10    | 21.48873005 |
| MAGOH        | NM_002370    | 39.5289618  | 3.863586664 | 0.003224724 | 10.23115702 |
| RPAP1        | NM_015540    | 101.060491  | 2.627842828 | 1.45E-10    | 38.45758578 |
| CLIP2        | NM_003388    | 112.2239396 | 1.494932391 | 4.50E-11    | 75.06957526 |
| PDSS1        | NM_014317    | 106.7747767 | 2.463896015 | 1.02E-10    | 43.33574795 |
| YRDC         | NM_024640    | 74.55083703 | 8.893464418 | 4.73E-05    | 8.382654219 |
| KLF3-AS1     | NR_026804    | 55.08108251 | 1.865775836 | 3.41E-05    | 29.52181149 |
| LOC101060553 | NR_120398    | 165.2432475 | 0.866676018 | 2.65E-23    | 190.6632284 |
| STXBP3       | NM_007269    | 163.9176338 | 1.321638639 | 6.08E-18    | 124.0260605 |
| PATL1        | NM_152716    | 34.28571429 | 0.598661153 | 0.00021542  | 57.27065157 |
| RBM15B       | NM_013286    | 89.10167405 | 11.32943168 | 3.63E-06    | 7.864619918 |
| TRIM4        | NM_033017    | 154.0797988 | 3.571770213 | 2.27E-15    | 43.13821709 |
| FAHD2B       | NM_199336    | 135.8764507 | 2.383908414 | 4.28E-16    | 56.99734516 |
| MAP1S        | NM_018174    | 75.08108251 | 2.792972593 | 4.71E-07    | 26.8821408  |
| CDCA2        | NM_152562    | 84.18275656 | 2.360465086 | 3.29E-08    | 35.66363131 |
| TANC1        | NM_033394    | 207.0398994 | 1.730008034 | 3.59E-20    | 119.6756866 |
| SDF2L1       | NM_022044    | 112.4890624 | 13.0904119  | 3.14E-07    | 8.593240857 |
| MAP1LC3B     | NM_022818    | 83.91763382 | 6.399488097 | 8.98E-07    | 13.11317914 |
| TTC12        | NM_017868    | 117.4079799 | 0.23702487  | 1.84E-17    | 495.3403416 |
| MKI67        | NM_001145966 | 49.89704227 | 5.375679335 | 0.000833302 | 9.281997522 |
| PI4K2B       | NM_018323    | 117.9382254 | 1.65979668  | 1.50E-12    | 71.05582675 |
| C1GALT1      | NM_020156    | 163.1222656 | 1.189342931 | 4.50E-18    | 137.1532645 |

|           |              |             |             |             |             |
|-----------|--------------|-------------|-------------|-------------|-------------|
| C10orf107 | NM_173554    | 24.4478793  | 0.088088002 | 0.001596169 | 277.5392637 |
| NLN       | NM_020726    | 152.2239396 | 1.380711566 | 1.25E-15    | 110.2503545 |
| TIPIN     | NM_001289986 | 109.8970423 | 1.544983487 | 7.98E-13    | 71.13153196 |
| PBK       | NM_001278945 | 53.01930787 | 1.127838434 | 1.13E-05    | 47.0096658  |
| CEP135    | NM_025009    | 58.46847084 | 0.18155047  | 9.37E-08    | 322.0507826 |
| SPAG5     | NM_006461    | 55.61132799 | 1.902943971 | 1.53E-05    | 29.22383887 |
| FAM227B   | NM_152647    | 75.34620525 | 0.103296609 | 1.92E-09    | 729.4160577 |
| RLF       | NM_012421    | 118.7335936 | 0.750157667 | 1.51E-14    | 158.2781844 |
| MRPL51    | NM_016497    | 109.8970423 | 11.20173135 | 2.98E-06    | 9.810719331 |
| POLR2A    | NM_000937    | 304.1827566 | 4.865324475 | 5.11E-31    | 62.52054887 |
| STARD5    | NM_181900    | 109.6319195 | 3.525699564 | 2.39E-11    | 31.0950827  |
| FAR1      | NM_032228    | 121.5907364 | 0.192484118 | 2.24E-18    | 631.6923056 |
| FGF9      | NM_002010    | 89.10167405 | 2.47650697  | 4.51E-09    | 35.97876974 |
| PPP2CB    | NM_001009552 | 55.34620525 | 2.846776416 | 2.92E-05    | 19.44171131 |
| TST       | NM_001270483 | 75.34620525 | 15.82846339 | 0.0004564   | 4.760171811 |
| PLCD3     | NM_133373    | 74.55083703 | 5.315982705 | 1.94E-06    | 14.02390511 |
| OBFC1     | NM_024928    | 170.4272878 | 4.099194536 | 1.40E-16    | 41.57579892 |
| ATP5B     | NM_001686    | 201.5907364 | 5.910377815 | 1.24E-20    | 34.10792723 |
| SMNDC1    | NM_005871    | 50.16216501 | 4.093130045 | 0.000224518 | 12.25520921 |
| CYB5B     | NM_030579    | 124.713002  | 6.41160093  | 1.98E-10    | 19.45114853 |
| FERMT1    | NM_017671    | 83.1222656  | 2.68291786  | 3.80E-08    | 30.98203893 |
| MPHOSPH8  | NM_017520    | 66.50965393 | 1.334993515 | 1.01E-06    | 49.8202075  |
| LOC344967 | NR_027277    | 123.9176338 | 2.086017552 | 7.72E-14    | 59.40392673 |
| OGFOD1    | NM_018233    | 67.30502215 | 1.668332767 | 3.28E-07    | 40.34268432 |
| ZMYM4     | NM_005095    | 48.83655131 | 0.2351445   | 6.28E-06    | 207.6874064 |
| GRHL2     | NM_024915    | 124.4478793 | 1.294398614 | 2.08E-12    | 96.14339663 |
| CHKB      | NM_005198    | 98.2033481  | 15.02176041 | 1.15E-05    | 6.537406097 |
| BEND6     | NM_152731    | 26.50965393 | 0.698306389 | 0.00419737  | 37.96278305 |
| MTERF4    | NM_182501    | 121.060491  | 5.283912835 | 2.32E-11    | 22.91114459 |
| MCC       | NM_001085377 | 56.14157347 | 0.80540661  | 2.94E-06    | 69.70587623 |
| DDI2      | NM_032341    | 161.8558592 | 1.642966885 | 2.76E-18    | 98.51437704 |
| TVP23C    | NM_145301    | 112.2239396 | 1.514923429 | 1.32E-11    | 74.07895178 |
| ATP1B1    | NM_001677    | 115.0810825 | 4.449288228 | 1.03E-10    | 25.8650545  |
| FAM8A1    | NM_016255    | 80          | 3.722975141 | 9.71E-08    | 21.48819076 |
| RAB25     | NM_020387    | 84.97812478 | 5.735375544 | 2.09E-07    | 14.81648832 |
| POLR2E    | NM_002695    | 70.95753323 | 9.952136514 | 5.89E-05    | 7.129879411 |
| DDX59     | NM_001031725 | 81.85585918 | 1.109337744 | 1.76E-09    | 73.7880412  |
| POR       | NM_000941    | 172.7541851 | 2.377284542 | 1.11E-17    | 72.66870334 |
| HSPA9     | NM_004134    | 44.97812478 | 4.206614849 | 0.001244534 | 10.69223744 |
| WDR75     | NM_032168    | 121.3256137 | 0.60149075  | 2.39E-15    | 201.7081952 |
| HEBP2     | NM_014320    | 126.7747767 | 0.992342807 | 6.27E-17    | 127.7530061 |
| SETD5     | NM_001292043 | 48.83655131 | 2.346610604 | 0.000177103 | 20.81152758 |
| RBM15     | NM_001201545 | 83.91763382 | 5.430808127 | 2.26E-07    | 15.45214485 |
| CLIC3     | NM_004669    | 98.46847084 | 13.6797273  | 1.22E-05    | 7.198131126 |
| CWC22     | NM_020943    | 78.46847084 | 0.495077466 | 8.48E-10    | 158.4973591 |
| CREG1     | NM_003851    | 134.0797988 | 3.695965236 | 1.86E-13    | 36.27734307 |
| ANKS1A    | NM_015245    | 85.97940845 | 1.236243575 | 2.37E-09    | 69.54892237 |
| SLC2A12   | NM_145176    | 29.63191953 | 0.87551826  | 0.002087333 | 33.84500458 |
| CASC10    | NM_001010911 | 61.85585918 | 5.539531026 | 3.10E-05    | 11.16626279 |
| HIATL1    | NM_032558    | 108.8365513 | 0.431187372 | 7.98E-14    | 252.411268  |
| RANBP10   | NM_020850    | 107.0398994 | 1.214330059 | 7.22E-11    | 88.14728633 |
| TMEM59    | NM_004872    | 49.36679679 | 1.209136436 | 4.30E-05    | 40.82814424 |
| RPL30     | NM_000989    | 147.5701449 | 6.491019776 | 1.02E-13    | 22.73450859 |
| MRPS24    | NM_032014    | 78.46847084 | 6.857641176 | 3.67E-06    | 11.44248712 |
| EPCAM     | NM_002354    | 113.0193079 | 4.087468329 | 3.24E-11    | 27.65019782 |
| RHPN1     | NM_052924    | 198.4684708 | 10.00972072 | 8.90E-17    | 19.82757326 |
| PAPLN     | NM_173462    | 86.77477667 | 1.654156057 | 5.49E-09    | 52.45863974 |
| CCND1     | NM_053056    | 135.3462052 | 17.68499903 | 1.25E-08    | 7.653164415 |
| EIF4EBP2  | NM_004096    | 161.060491  | 5.150276696 | 9.70E-15    | 31.27220157 |
| TPTE2P1   | NR_026730    | 35.34620525 | 0.18894074  | 6.42E-05    | 187.0756156 |
| IFT46     | NM_001168618 | 38.2033481  | 0.43870755  | 3.40E-05    | 87.08158347 |
| C7orf43   | NM_018275    | 143.1222656 | 17.59021166 | 5.47E-09    | 8.136472056 |
| LIPT2     | NM_001144869 | 203.6525111 | 13.44530212 | 5.85E-15    | 15.14674116 |
| LINC00637 | NR_038436    | 157.4079799 | 4.672594356 | 2.38E-16    | 33.68749091 |

|              |              |             |             |             |             |
|--------------|--------------|-------------|-------------|-------------|-------------|
| NAA15        | NM_057175    | 47.30502215 | 1.654159714 | 0.000163665 | 28.5976147  |
| LOC642852    | NR_026943    | 92.48906239 | 11.75464687 | 3.29E-06    | 7.868297826 |
| FAM58A       | NM_001130997 | 31.69369417 | 2.056464488 | 0.004212891 | 15.41173911 |
| CDK7         | NM_001799    | 73.54955335 | 0.074865914 | 1.63E-12    | 982.4170893 |
| CATSPER2P1   | NR_002318    | 138.4684708 | 1.179778726 | 4.56E-18    | 117.3681706 |
| MCM6         | NM_005915    | 92.75418513 | 3.689897131 | 3.96E-08    | 25.13733631 |
| C9orf85      | NM_182505    | 49.89704227 | 0.282702145 | 2.08E-06    | 176.5004023 |
| ALKBH4       | NM_017621    | 53.28443061 | 3.821983075 | 6.97E-05    | 13.94156634 |
| MYCBP        | NM_012333    | 79.26383906 | 2.141215554 | 2.21E-08    | 37.01815024 |
| STARD9       | NM_020759    | 94.81595977 | 1.088829876 | 1.75E-10    | 87.0806008  |
| ZFAND3       | NM_021943    | 72.48906239 | 0.807244877 | 8.24E-08    | 89.79810772 |
| DCAF12       | NM_015397    | 115.8764507 | 2.134748451 | 2.32E-12    | 54.28107966 |
| ARL1         | NM_001177    | 68.63063585 | 1.357484167 | 6.25E-08    | 50.55722748 |
| LINC00657    | NR_027451    | 235.3462052 | 5.651627752 | 4.47E-25    | 41.64219859 |
| SREK1IP1     | NM_173829    | 126.5096539 | 0.569554162 | 2.40E-15    | 222.1204975 |
| JMJD7        | NM_001114632 | 141.8558592 | 0.560299677 | 4.61E-21    | 253.178549  |
| KCNK6        | NM_004823    | 115.611328  | 3.685413455 | 1.68E-11    | 31.36997501 |
| IMPA2        | NM_014214    | 172.2239396 | 1.651433852 | 4.65E-19    | 104.2875193 |
| KRII         | NM_023008    | 138.7335936 | 9.703448107 | 5.40E-11    | 14.29734998 |
| WDR3         | NM_006784    | 95.87645073 | 1.055891677 | 3.21E-11    | 90.80140777 |
| SLC31A2      | NM_001860    | 72.48906239 | 4.336199626 | 1.73E-06    | 16.71718755 |
| TMED7-TICAM2 | NM_001164468 | 55.61132799 | 2.678196238 | 4.01E-05    | 20.76447095 |
| THUMPD3-AS1  | NR_027007    | 166.5096539 | 14.25156904 | 2.39E-12    | 11.68360153 |
| ZNF674-AS1   | NR_015378    | 43.91763382 | 2.587952379 | 0.000860369 | 16.97003166 |
| TUFM         | NM_003321    | 81.59073644 | 7.551535522 | 2.28E-06    | 10.80452263 |
| TMEM104      | NM_017728    | 90.95753323 | 2.329589963 | 5.19E-09    | 39.044439   |
| RNF114       | NM_018683    | 168.8365513 | 0.449458098 | 1.39E-25    | 375.6446977 |
| TOMM20L      | NM_207377    | 33.54955335 | 0.490134872 | 5.16E-05    | 68.44963553 |
| MIS18BP1     | NM_018353    | 121.060491  | 2.156246864 | 1.98E-12    | 56.14407746 |
| FAM118A      | NM_001104595 | 115.8764507 | 7.231386963 | 1.21E-09    | 16.02409763 |
| ANKRA2       | NM_023039    | 126.7747767 | 1.341719462 | 2.59E-15    | 94.48679864 |
| LINC00884    | NR_033929    | 72.48906239 | 4.058540582 | 6.64E-06    | 17.86086918 |
| BTC          | NM_001729    | 43.91763382 | 0.326286693 | 1.19E-05    | 134.5982989 |
| CCDC157      | NM_001017437 | 135.8764507 | 6.801620467 | 3.84E-12    | 19.97707037 |
| ELL          | NM_006532    | 84.4478793  | 1.935168424 | 2.24E-08    | 43.63851654 |
| ALDH9A1      | NM_000696    | 149.6319195 | 1.513224161 | 5.06E-17    | 98.88285117 |
| ATF6         | NM_007348    | 64.4478793  | 0.333591973 | 1.08E-07    | 193.1937351 |
| ZFHX4        | NM_024721    | 30.42728775 | 0.194749493 | 0.000799029 | 156.2380847 |
| MED16        | NM_005481    | 120.5302455 | 4.544613239 | 2.34E-11    | 26.52156281 |
| ATXN1L       | NM_001137675 | 70.95753323 | 3.330447657 | 8.48E-07    | 21.30570438 |
| DEGS1        | NM_003676    | 152.2239396 | 1.095197216 | 1.44E-20    | 138.9922632 |
| SRSF9        | NM_003769    | 107.3050222 | 6.342983357 | 2.22E-09    | 16.91712182 |
| RAB11B       | NM_004218    | 57.93822536 | 0.42110108  | 1.44E-07    | 137.5874536 |
| GTF2H2       | NM_001515    | 218.4684708 | 2.098341548 | 3.28E-24    | 104.1148287 |
| SYNGR2       | NM_004710    | 157.9382254 | 27.39716325 | 2.53E-08    | 5.764765642 |
| FNBP1        | NM_015033    | 115.0810825 | 0.634660084 | 3.78E-13    | 181.3271158 |
| ENTPD1-AS1   | NR_038444    | 66.50965393 | 0.874851695 | 3.44E-07    | 76.02391846 |
| GABRE        | NM_004961    | 88.57142857 | 1.33340219  | 2.97E-10    | 66.42514108 |
| POLR2J3      | NM_001097615 | 106.7747767 | 2.271867759 | 3.97E-11    | 46.99867598 |
| EMC8         | NM_006067    | 159.7940845 | 5.467589329 | 6.73E-15    | 29.22569252 |
| GCSH         | NR_033249    | 155.8764507 | 6.622210631 | 5.22E-14    | 23.53843141 |
| FSCN1        | NM_003088    | 276.6718189 | 11.87658965 | 1.24E-24    | 32.29556102 |
| FLOT2        | NM_004475    | 147.0398994 | 3.985558131 | 5.59E-15    | 36.89317646 |
| GPD1L        | NM_015141    | 58.73359358 | 0.854449158 | 3.95E-07    | 68.738547   |
| CCDC97       | NM_052848    | 195.611328  | 7.957334254 | 7.28E-18    | 24.58251994 |
| HNRNPUL1     | NM_144732    | 74.55083703 | 3.962152841 | 2.88E-06    | 18.81573983 |
| PDCD7        | NM_005707    | 118.4684708 | 2.621296239 | 2.28E-12    | 45.19461368 |
| LOC646626    | NR_045484    | 109.8970423 | 17.18704916 | 6.95E-06    | 6.394177455 |
| TMEM198      | NM_001005209 | 35.87645073 | 3.760889682 | 0.004266239 | 9.539352057 |
| KLHL7-AS1    | NR_046220    | 110.4272878 | 8.114151312 | 7.07E-09    | 13.60922215 |
| UBFD1        | NM_019116    | 41.3256137  | 4.577240616 | 0.004147449 | 9.028499301 |
| FAM122A      | NM_138333    | 114.8159598 | 0.373020497 | 2.66E-16    | 307.8006719 |
| PDS5A        | NM_001100399 | 89.10167405 | 1.633406589 | 1.74E-08    | 54.54959875 |
| PCIF1        | NM_022104    | 163.6525111 | 7.348991643 | 1.28E-14    | 22.26870284 |

|                |              |             |             |             |             |
|----------------|--------------|-------------|-------------|-------------|-------------|
| PDP2           | NM_020786    | 89.63191953 | 0.742444764 | 2.90E-12    | 120.725371  |
| C7orf25        | NM_024054    | 99.26383906 | 11.14905349 | 1.13E-06    | 8.903342253 |
| CIT            | NM_007174    | 70.16216501 | 0.164242066 | 5.09E-09    | 427.1875444 |
| IMPDH2         | NM_000884    | 196.4066962 | 30.7030721  | 1.10E-10    | 6.39697212  |
| KIAA0922       | NM_015196    | 120.5302455 | 1.55233736  | 9.98E-12    | 77.64436299 |
| EMC10          | NM_206538    | 148.6306359 | 3.226238851 | 3.20E-16    | 46.06932181 |
| MSH3           | NM_002439    | 190.162165  | 0.743588782 | 2.10E-21    | 255.735656  |
| A4GALT         | NM_017436    | 100.5302455 | 2.699822924 | 1.83E-10    | 37.23586631 |
| DAK            | NM_015533    | 197.6731026 | 7.017617497 | 2.40E-18    | 28.16812155 |
| TMEM189-UBE2V1 | NM_199203    | 112.2239396 | 6.756260921 | 8.08E-09    | 16.610362   |
| NUP205         | NM_015135    | 87.03989941 | 0.751284811 | 4.32E-10    | 115.8547306 |
| SLC25A53       | NM_001012755 | 37.40797988 | 0.394777424 | 0.000110099 | 94.75714071 |
| IBA57          | NM_001010867 | 132.7541851 | 1.928703892 | 7.12E-15    | 68.83077577 |
| COMMD2         | NM_016094    | 84.4478793  | 2.653817212 | 1.39E-08    | 31.82128706 |
| CASC3          | NM_007359    | 37.67310262 | 1.746167352 | 0.001639942 | 21.57473772 |
| ZFYVE20        | NM_022340    | 61.06049096 | 1.050213008 | 2.01E-06    | 58.14105375 |
| PRR14L         | NM_173566    | 146.7747767 | 2.714780334 | 1.01E-14    | 54.06506553 |
| VAC14          | NM_018052    | 89.89704227 | 1.103055619 | 5.61E-10    | 81.49819529 |
| KLF2           | NM_016270    | 94.81595977 | 20.42004448 | 0.000119067 | 4.643278806 |
| ATP6V1G1       | NM_004888    | 95.34620525 | 2.306351273 | 3.41E-10    | 41.34071266 |
| HILPDA         | NM_001098786 | 147.8352676 | 4.600582361 | 7.56E-15    | 32.13403349 |
| LOC728613      | NR_003713    | 89.10167405 | 0.504908201 | 3.41E-12    | 176.4710375 |
| EIF4B          | NM_001300821 | 50.42728775 | 7.193259946 | 0.001871543 | 7.010352487 |
| HTATSF1        | NM_014500    | 60.53024548 | 0.472521261 | 7.40E-08    | 128.1005755 |
| LOC100131655   | NR_040024    | 111.6936942 | 2.148708189 | 3.66E-12    | 51.98178828 |
| DIO3           | NM_001362    | 57.40797988 | 9.267626769 | 0.002011442 | 6.194463946 |
| ZDHHC6         | NM_022494    | 178.9987163 | 0.802718157 | 1.08E-24    | 222.9907405 |
| SLC35E2B       | NM_001290264 | 121.8558592 | 3.650475785 | 1.13E-11    | 33.38081564 |
| TOP2B          | NM_001068    | 37.40797988 | 0.749034154 | 0.00020276  | 49.94162108 |
| DIEXF          | NM_014388    | 55.34620525 | 2.056471589 | 2.36E-05    | 26.91318739 |
| NAV1           | NM_001167738 | 50.16216501 | 0.467865966 | 3.23E-06    | 107.2148193 |
| LINC00568      | NR_051960    | 92.48906239 | 5.731556443 | 4.79E-08    | 16.13681437 |
| ZPR1           | NM_003904    | 129.1016741 | 2.573218086 | 4.45E-14    | 50.17129125 |
| ARHGAP5-AS1    | NR_027263    | 118.2033481 | 23.03824521 | 6.28E-05    | 5.130744423 |
| SAP30L-AS1     | NR_037897    | 95.61132799 | 1.090897947 | 5.07E-10    | 87.64461265 |
| ZDHHC23        | NM_173570    | 60.26512274 | 0.552587957 | 1.04E-07    | 109.0597832 |
| CHRNA5         | NM_000745    | 127.0398994 | 1.809971561 | 3.91E-14    | 70.18889257 |
| KPNA6          | NM_012316    | 83.1222656  | 1.377169153 | 2.51E-08    | 60.35733912 |
| LOC100131347   | NR_036551    | 113.0193079 | 2.277976369 | 1.27E-12    | 49.61390706 |
| ZNF487         | NR_026693    | 34.81595977 | 0.941882769 | 0.000402956 | 36.96421776 |
| CPNE3          | NM_003909    | 149.3667968 | 2.578423887 | 1.43E-15    | 57.92949621 |
| TRIM62         | NM_018207    | 65.97940845 | 1.949840303 | 1.48E-06    | 33.8383653  |
| LOC285074      | NR_026846    | 84.4478793  | 1.972176894 | 1.11E-08    | 42.81962717 |
| FANCG          | NM_004629    | 136.1415735 | 12.67714013 | 5.39E-10    | 10.73913928 |
| OIP5-AS1       | NR_026757    | 126.5096539 | 4.647175654 | 1.13E-11    | 27.22291201 |
| TMX4           | NM_021156    | 160.7953682 | 1.380849162 | 1.29E-18    | 116.446729  |
| BRIP1          | NM_032043    | 120.0592073 | 0.25472378  | 6.12E-15    | 471.3309731 |
| C9orf41-AS1    | NR_121183    | 44.18275656 | 2.035304474 | 0.000518882 | 21.70818034 |
| ING3           | NM_019071    | 83.38738834 | 1.887629249 | 6.58E-09    | 44.17572381 |
| PIBF1          | NM_006346    | 86.77477667 | 0.287298488 | 4.19E-10    | 302.0370112 |
| ZNF696         | NM_030895    | 208.3655131 | 5.043128861 | 1.23E-21    | 41.31671406 |
| LOC102724301   | NR_120587    | 39.79408454 | 5.921066764 | 0.003712217 | 6.720762681 |
| LOC101927919   | NR_110854    | 53.54955335 | 1.486426078 | 4.45E-06    | 36.02570901 |
| MYL12A         | NM_006471    | 57.67310262 | 8.822957458 | 0.001142821 | 6.536708683 |
| PGM2L1         | NM_173582    | 134.8159598 | 0.366916564 | 2.47E-18    | 367.4294731 |
| BCL9L          | NM_182557    | 77.14285714 | 12.9498142  | 0.000105766 | 5.957062856 |
| BOK            | NM_032515    | 115.611328  | 6.844749533 | 6.02E-10    | 16.89051257 |
| ORMDL2         | NM_014182    | 99.26383906 | 16.78839968 | 1.28E-05    | 5.912644503 |
| HSDL1          | NM_031463    | 129.3667968 | 3.534284926 | 9.40E-13    | 36.6033864  |
| LINC01278      | NR_015353    | 43.65251108 | 0.303475634 | 3.65E-05    | 143.8418976 |
| EGR1           | NM_001964    | 137.6731026 | 30.50072723 | 3.39E-06    | 4.513764593 |
| ATP13A1        | NM_020410    | 86.24453119 | 2.082032417 | 1.76E-09    | 41.42324129 |
| ANKRD32        | NM_032290    | 90.95753323 | 0.055989745 | 3.54E-15    | 1624.539169 |
| LRRC57         | NM_153260    | 190.162165  | 4.992758102 | 1.84E-20    | 38.08759831 |

|              |              |             |             |             |             |
|--------------|--------------|-------------|-------------|-------------|-------------|
| DHTKD1       | NM_018706    | 92.75418513 | 1.466786958 | 1.96E-09    | 63.23630343 |
| EIF2B1       | NM_001414    | 78.46847084 | 7.644529248 | 4.43E-06    | 10.26465702 |
| MRPL47       | NM_177988    | 78.46847084 | 0.470791712 | 1.29E-10    | 166.6734328 |
| MTHFR        | NM_005957    | 70.69241049 | 6.421025036 | 2.15E-05    | 11.00952108 |
| CCNE2        | NM_057749    | 180.5894528 | 4.864646938 | 3.41E-18    | 37.12282825 |
| SNHG22       | NR_117096    | 111.6936942 | 2.792951626 | 1.68E-11    | 39.99127415 |
| SLC5A6       | NR_028323    | 152.7541851 | 4.541355168 | 3.27E-15    | 33.63625602 |
| PNPT1        | NM_033109    | 78.73359358 | 0.410230941 | 1.63E-10    | 191.9250495 |
| PCNXL2       | NM_014801    | 99.26383906 | 0.435516588 | 3.22E-11    | 227.9220628 |
| B3GNT5       | NM_032047    | 55.34620525 | 2.641969745 | 2.05E-05    | 20.94884143 |
| TVP23B       | NM_016078    | 143.3873883 | 4.224819641 | 5.21E-14    | 33.93929221 |
| FAM83G       | NM_001039999 | 94.81595977 | 2.290917939 | 8.32E-10    | 41.38775909 |
| CCNB1        | NM_031966    | 56.40669621 | 4.680929313 | 5.80E-05    | 12.05032002 |
| SLC27A1      | NM_198580    | 83.91763382 | 5.870309561 | 4.49E-07    | 14.29526551 |
| NXT1         | NM_013248    | 59.26383906 | 7.811427886 | 0.000235712 | 7.586812543 |
| AKAP8        | NM_005858    | 151.6936942 | 3.639703957 | 3.56E-15    | 41.67748145 |
| GNPTAB       | NM_024312    | 87.30502215 | 1.000492135 | 3.02E-10    | 87.26207743 |
| NEAT1        | NR_028272    | 195.611328  | 47.334553   | 7.44E-08    | 4.132527205 |
| FAF1         | NM_007051    | 106.7747767 | 0.589302755 | 2.08E-11    | 181.188321  |
| XXYLT1       | NM_152531    | 167.5701449 | 1.21173683  | 6.53E-17    | 138.2892231 |
| PDCD5        | NM_004708    | 161.3256137 | 5.249819116 | 5.03E-16    | 30.72974709 |
| RSRP1        | NM_020317    | 197.9382254 | 12.97789346 | 9.32E-16    | 15.25195333 |
| KIF5B        | NM_004521    | 258.7335936 | 2.134425369 | 1.15E-29    | 121.2193208 |
| SOD1         | NM_000454    | 160.7953682 | 6.521232315 | 2.90E-15    | 24.65720595 |
| ETV5         | NM_004454    | 117.9382254 | 2.839104822 | 1.13E-11    | 41.5406379  |
| HNRNPA3      | NM_194247    | 44.97812478 | 7.114924475 | 0.00412567  | 6.32165878  |
| ZFP91        | NM_053023    | 51.95881691 | 0.989269131 | 3.32E-06    | 52.5224282  |
| SLC17A5      | NM_012434    | 73.01930787 | 0.912534466 | 7.32E-09    | 80.01813695 |
| LRRC3        | NM_030891    | 34.28571429 | 3.486186934 | 0.00458429  | 9.834732026 |
| DTD2         | NM_080664    | 127.0398994 | 3.174227019 | 7.72E-14    | 40.02231052 |
| RPL23A       | NM_000984    | 127.0398994 | 20.55796845 | 4.35E-07    | 6.179594046 |
| PRDX4        | NM_006406    | 72.48906239 | 1.375246498 | 4.92E-08    | 52.70986873 |
| KCTD3        | NM_016121    | 56.14157347 | 0.367577144 | 1.76E-07    | 152.7341248 |
| ARF3         | NM_001659    | 149.6319195 | 3.799216566 | 3.92E-15    | 39.3849408  |
| UBAC2-AS1    | NR_036532    | 158.7335936 | 11.83268774 | 9.69E-13    | 13.41483838 |
| SLC8B1       | NM_024959    | 227.8352676 | 3.502306102 | 1.05E-23    | 65.05292827 |
| SLC35G1      | NM_153226    | 212.4890624 | 2.12751649  | 2.74E-26    | 99.876576   |
| FABP5P3      | NR_002935    | 46.50965393 | 2.926381844 | 0.000311949 | 15.89322802 |
| MED29        | NM_017592    | 120.5302455 | 11.32071873 | 4.14E-09    | 10.64687219 |
| XKR8         | NM_018053    | 181.8558592 | 3.455072969 | 1.62E-20    | 52.63444819 |
| LOC100134868 | NR_004846    | 64.18275656 | 1.425497245 | 2.59E-07    | 45.02481978 |
| DDA1         | NM_024050    | 52.22393965 | 3.980246466 | 0.000248575 | 13.12078036 |
| PPP1R15A     | NM_014330    | 162.3861047 | 10.6857032  | 4.12E-13    | 15.19657636 |
| SNW1         | NM_012245    | 53.54955335 | 3.577694305 | 4.39E-05    | 14.96761567 |
| DNAJC24      | NM_181706    | 104.713002  | 0.597206401 | 1.95E-13    | 175.3380438 |
| JPH1         | NM_020647    | 59.26383906 | 2.340301241 | 1.28E-05    | 25.32316696 |
| TUBG1        | NM_001070    | 67.03989941 | 15.33334292 | 0.001704412 | 4.37216462  |
| C5orf42      | NM_023073    | 152.7541851 | 0.324307082 | 3.13E-19    | 471.0171116 |
| ZNF202       | NM_003455    | 97.67310262 | 0.86516467  | 1.67E-12    | 112.8953897 |
| NHLRC2       | NM_198514    | 81.59073644 | 1.583549562 | 2.39E-08    | 51.52395503 |
| USP53        | NM_019050    | 203.6525111 | 0.390146994 | 7.58E-28    | 521.9891842 |
| SRRD         | NM_001013694 | 109.3667968 | 2.207174688 | 6.71E-13    | 49.55058492 |
| LRRC59       | NM_018509    | 198.9987163 | 7.626618865 | 2.23E-18    | 26.09265257 |
| ANKRD39      | NM_016466    | 181.8558592 | 1.937605446 | 1.00E-22    | 93.85598062 |
| MANF         | NM_006010    | 113.2844306 | 10.85959244 | 2.71E-08    | 10.43173869 |
| TMEM62       | NM_024956    | 98.2033481  | 0.77410328  | 6.76E-11    | 126.8607829 |
| TMLHE        | NM_001184797 | 74.81595977 | 0.387941586 | 5.40E-09    | 192.8536731 |
| NAT9         | NM_015654    | 133.8146761 | 10.33769381 | 9.70E-11    | 12.94434509 |
| F3           | NM_001993    | 100         | 5.530708473 | 9.07E-09    | 18.08086622 |
| CAND1        | NM_018448    | 95.34620525 | 1.273311454 | 4.29E-10    | 74.88050546 |
| GALNT7       | NM_017423    | 80          | 0.848848023 | 5.54E-09    | 94.2453747  |
| ADCK5        | NM_174922    | 267.5701449 | 5.381926546 | 6.66E-28    | 49.71642452 |
| SCOC-AS1     | NR_033939    | 47.30502215 | 0.508256721 | 8.03E-06    | 93.07308731 |
| TAF5         | NM_006951    | 109.8970423 | 3.644930396 | 1.75E-10    | 30.15065593 |

|                |              |             |             |             |             |
|----------------|--------------|-------------|-------------|-------------|-------------|
| HSP90B1        | NM_003299    | 101.8558592 | 3.284935715 | 3.83E-10    | 31.00695661 |
| GPCPD1         | NM_019593    | 71.69369417 | 0.673475941 | 1.14E-08    | 106.4532373 |
| SPPL2B         | NM_001077238 | 115.8764507 | 1.361112547 | 1.02E-13    | 85.13362911 |
| LINC00839      | NR_026827    | 43.91763382 | 0.405697515 | 3.72E-06    | 108.2521637 |
| GTF3C4         | NM_012204    | 74.81595977 | 3.096808071 | 9.17E-07    | 24.15905605 |
| SHPK           | NM_013276    | 112.7541851 | 2.154440287 | 3.86E-12    | 52.33572069 |
| NABP2          | NM_024068    | 87.03989941 | 3.195927584 | 9.86E-09    | 27.23462817 |
| ASNA1          | NM_004317    | 61.59073644 | 1.026059096 | 8.71E-08    | 60.02650012 |
| LIMD2          | NM_030576    | 54.81595977 | 10.11210525 | 0.003655647 | 5.420825675 |
| LOC101927592   | NR_104646    | 31.95881691 | 0.072674096 | 0.000300008 | 439.7552727 |
| HAT1           | NR_027862    | 93.01930787 | 0.497539523 | 5.76E-12    | 186.9586304 |
| PIGB           | NM_004855    | 116.1415735 | 2.155206537 | 1.75E-12    | 53.88883685 |
| DNTTIP2        | NM_014597    | 87.57014489 | 0.44530329  | 2.44E-13    | 196.6528135 |
| MTG2           | NM_015666    | 75.34620525 | 2.10028027  | 5.94E-08    | 35.8743575  |
| SP4            | NM_003112    | 51.42857143 | 0.080605934 | 1.22E-07    | 638.0246298 |
| ACSL4          | NM_004458    | 86.50965393 | 1.510080166 | 2.01E-08    | 57.2881201  |
| RNF10          | NM_014868    | 81.3256137  | 2.083093035 | 4.93E-08    | 39.04079767 |
| MRPS10         | NM_018141    | 80.79536822 | 3.253143647 | 6.74E-08    | 24.83608994 |
| SSSCA1         | NM_006396    | 46.50965393 | 4.316366893 | 0.001895872 | 10.77518549 |
| SCAF11         | NM_004719    | 135.8764507 | 1.447552885 | 1.79E-14    | 93.866312   |
| CCDC23         | NM_199342    | 120         | 4.706840454 | 1.27E-11    | 25.49480934 |
| PLCG1-AS1      | NR_109889    | 60.53024548 | 4.841102008 | 7.39E-05    | 12.5034022  |
| KLHL35         | NM_001039548 | 67.03989941 | 11.67470612 | 0.000674362 | 5.742320085 |
| UBQLN2         | NM_013444    | 97.67310262 | 3.453020924 | 1.62E-09    | 28.28627592 |
| SART3          | NM_014706    | 24.71300204 | 0.816129192 | 0.003591528 | 30.28074754 |
| LOC101927572   | NM_001290056 | 99.5289618  | 2.839638796 | 2.52E-10    | 35.04986689 |
| UCP2           | NM_003355    | 95.61132799 | 0.262045556 | 3.29E-15    | 364.8652901 |
| CCDC147-AS1    | NR_108036    | 69.36679679 | 0.632094004 | 1.83E-08    | 109.7412669 |
| ZNF263         | NM_005741    | 36.40669621 | 1.612628892 | 0.000461319 | 22.57599153 |
| NCL            | NM_005381    | 187.0398994 | 8.852407624 | 1.03E-16    | 21.12870389 |
| PDZD7          | NM_001195263 | 70.95753323 | 6.489840445 | 2.39E-05    | 10.93363294 |
| ZNF252P-AS1    | NR_026974    | 196.1415735 | 13.94140607 | 4.33E-15    | 14.06899508 |
| GLYR1          | NM_032569    | 101.8558592 | 2.595622689 | 1.94E-10    | 39.24139653 |
| ZNF792         | NM_175872    | 39.26383906 | 1.610293991 | 0.000191356 | 24.38302527 |
| NUDCD3         | NM_015332    | 107.8352676 | 1.849815191 | 1.11E-10    | 58.29515734 |
| C15orf38-AP3S2 | NM_001199058 | 50.16216501 | 3.599072924 | 0.000103156 | 13.93752393 |
| TMEM63A        | NM_014698    | 161.3256137 | 5.79490963  | 4.54E-14    | 27.83919405 |
| RARS           | NM_002887    | 175.3462052 | 1.065686847 | 9.47E-22    | 164.5382092 |
| LOC154761      | NR_015421    | 75.08108251 | 1.852027196 | 7.17E-08    | 40.53994599 |
| HIAT1          | NM_033055    | 132.2239396 | 2.090919526 | 6.24E-14    | 63.23722076 |
| ESAM           | NM_138961    | 101.060491  | 5.769551758 | 4.42E-09    | 17.5161772  |
| SDF4           | NM_016176    | 92.22393965 | 3.11947529  | 5.22E-09    | 29.56392697 |
| SDHAP3         | NR_003263    | 91.95881691 | 0.477330365 | 3.53E-12    | 192.6523507 |
| RAD18          | NM_020165    | 58.2033481  | 0.467117514 | 6.04E-07    | 124.6010828 |
| PLD2           | NM_002663    | 126.2445312 | 3.930000252 | 9.04E-13    | 32.12328832 |
| PDCD11         | NM_014976    | 141.5907364 | 5.00647392  | 4.17E-13    | 28.28152881 |
| KDEL1C1        | NM_024089    | 64.71300204 | 0.961717947 | 6.25E-08    | 67.28896164 |
| DESI1          | NM_015704    | 186.2445312 | 5.835346    | 1.58E-17    | 31.91662177 |
| MGAT2          | NM_002408    | 153.0193079 | 6.018842279 | 3.31E-14    | 25.42337891 |
| GREB1L         | NM_001142966 | 93.01930787 | 0.39880322  | 1.05E-10    | 233.2461302 |
| ASF1B          | NM_018154    | 164.713002  | 4.534770804 | 2.56E-16    | 36.32223306 |
| FAM66C         | NR_026788    | 55.87645073 | 1.154716096 | 3.13E-06    | 48.38977384 |
| POLR2B         | NM_000938    | 63.91763382 | 0.915771595 | 1.53E-07    | 69.79647997 |
| IARS2          | NM_018060    | 178.4684708 | 1.006064691 | 7.89E-21    | 177.3926393 |
| CDCA8          | NM_001256875 | 84.4478793  | 1.460670656 | 5.06E-10    | 57.81445596 |
| C10orf10       | NM_007021    | 164.713002  | 11.45980304 | 5.96E-13    | 14.37310934 |
| LRRC41         | NM_006369    | 106.5096539 | 7.30724892  | 1.21E-08    | 14.57588965 |
| SLC2A1-AS1     | NR_033967    | 44.4478793  | 2.596212995 | 0.000212213 | 17.12027456 |
| CIRH1A         | NM_032830    | 94.81595977 | 1.18771639  | 1.98E-10    | 79.83047178 |
| MYO9A          | NM_006901    | 169.3667968 | 0.039093804 | 3.40E-26    | 4332.318105 |
| BOK-AS1        | NR_033346    | 146.2445312 | 5.825416426 | 9.56E-14    | 25.10456258 |
| LOC100505549   | NM_001242804 | 63.91763382 | 1.735460092 | 2.90E-06    | 36.83036799 |
| SAT2           | NM_133491    | 123.1222656 | 20.94224406 | 5.56E-06    | 5.879134311 |
| FANCM          | NM_020937    | 89.63191953 | 1.20915397  | 4.11E-09    | 74.12779657 |

|              |              |             |             |             |             |
|--------------|--------------|-------------|-------------|-------------|-------------|
| NUP88        | NM_002532    | 136.4066962 | 3.240095903 | 2.47E-13    | 42.09958603 |
| TMEM101      | NM_032376    | 78.73359358 | 11.88135914 | 3.58E-05    | 6.626648742 |
| MTFMT        | NM_139242    | 175.0810825 | 3.406635376 | 6.88E-18    | 51.39413621 |
| FAM64A       | NM_019013    | 83.38738834 | 4.420942902 | 1.06E-07    | 18.86190122 |
| ARFGEF2      | NM_006420    | 106.5096539 | 1.771175168 | 2.29E-10    | 60.13501987 |
| WBP4         | NM_007187    | 163.9176338 | 0.815825205 | 3.55E-22    | 200.9224928 |
| NDUFB7       | NM_004146    | 78.46847084 | 9.325330381 | 3.21E-05    | 8.414551296 |
| GPSM2        | NM_013296    | 97.93822536 | 0.298273302 | 1.06E-13    | 328.3506263 |
| ITGB8        | NM_002214    | 43.1222656  | 0.500897053 | 3.73E-05    | 86.09007646 |
| ZNF517       | NM_213605    | 175.0810825 | 3.182529611 | 9.64E-20    | 55.01318256 |
| FTSJ2        | NM_013393    | 103.6525111 | 1.543744011 | 1.01E-12    | 67.1435875  |
| LINC00998    | NR_024412    | 44.18275656 | 3.908897383 | 0.002409799 | 11.30312521 |
| RAB33B       | NM_031296    | 175.0810825 | 1.798829102 | 3.29E-20    | 97.3305815  |
| RHOF         | NM_019034    | 108.6306359 | 12.9608969  | 1.68E-07    | 8.381413467 |
| CDK4         | NM_000075    | 75.08108251 | 12.01908038 | 0.000190129 | 6.246824226 |
| FAM126A      | NM_032581    | 129.3667968 | 0.320613542 | 1.08E-17    | 403.4976066 |
| SCO1         | NM_004589    | 106.7747767 | 1.990005469 | 2.83E-12    | 53.65551922 |
| KIAA0195     | NM_014738    | 53.01930787 | 2.401867936 | 3.61E-05    | 22.07419778 |
| LIX1L        | NM_153713    | 49.63191953 | 0.512991353 | 1.08E-06    | 96.75001199 |
| ARHGAP31     | NM_020754    | 41.3256137  | 2.078766336 | 0.00130898  | 19.87987442 |
| ARID5A       | NM_212481    | 105.2794085 | 1.487034184 | 5.64E-13    | 71.26897929 |
| ZNF852       | NM_001287349 | 117.9382254 | 2.676715611 | 5.45E-13    | 44.06079781 |
| FAM219B      | NM_020447    | 73.54955335 | 15.84420484 | 0.000981397 | 4.642047618 |
| LINC01232    | NR_110731    | 52.75418513 | 9.229149587 | 0.004355822 | 5.716039667 |
| LGALS1       | NM_014181    | 63.65251108 | 10.09689079 | 0.000324264 | 6.304169512 |
| NFKBIA       | NM_020529    | 188.8365513 | 16.11186803 | 1.08E-13    | 11.72033876 |
| ICMT         | NM_012405    | 117.6731026 | 7.620202452 | 2.00E-09    | 15.44225411 |
| MMP11        | NM_005940    | 100.5302455 | 6.433856312 | 1.03E-08    | 15.62519282 |
| UBA6-AS1     | NR_015439    | 57.93822536 | 0.282377955 | 9.65E-09    | 205.1797047 |
| RNF220       | NM_018150    | 46.50965393 | 1.056317655 | 4.28E-05    | 44.02998825 |
| C7orf26      | NM_024067    | 84.97812478 | 1.245867524 | 3.86E-10    | 68.20799412 |
| KISS1R       | NM_032551    | 37.93822536 | 3.948954632 | 0.002473264 | 9.607156551 |
| PIGL         | NM_004278    | 133.5495533 | 1.506064624 | 1.33E-13    | 88.67451714 |
| SLC7A6OS     | NM_032178    | 104.713002  | 4.303350307 | 5.40E-10    | 24.33290217 |
| LOC100996654 | NR_110040    | 123.9176338 | 0.878951362 | 2.77E-14    | 140.9834937 |
| DDX1         | NM_004939    | 138.2033481 | 2.376021091 | 1.28E-14    | 58.16587597 |
| TAF1D        | NM_024116    | 132.4890624 | 9.646957924 | 1.36E-10    | 13.73376596 |
| ASAH2B       | NM_001079516 | 179.5289618 | 0.9312391   | 1.86E-24    | 192.7850342 |
| RNF11        | NM_014372    | 121.060491  | 1.714777325 | 3.92E-13    | 70.59837401 |
| FASTKD1      | NR_104020    | 63.38738834 | 0.296194701 | 9.13E-09    | 214.0058152 |
| VPS37B       | NM_024667    | 121.5907364 | 4.751496907 | 1.97E-11    | 25.58998539 |
| ALKBH1       | NM_006020    | 41.59073644 | 0.559853125 | 1.64E-05    | 74.28865634 |
| MTMR4        | NM_004687    | 47.0991067  | 3.398144259 | 0.000268754 | 13.86024345 |
| KDM4D        | NM_018039    | 57.93822536 | 0.323120426 | 2.01E-08    | 179.3084579 |
| KIAA1468     | NM_020854    | 133.0193079 | 0.982949532 | 2.65E-15    | 135.3266913 |
| KIAA0368     | NM_001080398 | 77.93822536 | 1.353900999 | 1.97E-07    | 57.56567533 |
| ZNF346       | NM_012279    | 87.30502215 | 2.497310475 | 7.16E-09    | 34.95961877 |
| ARHGEF26-AS1 | NR_037901    | 109.6319195 | 0.114811298 | 2.92E-16    | 954.8878996 |
| BRCA2        | NM_000059    | 155.0810825 | 0.622391225 | 2.62E-19    | 249.1697767 |
| PRKAR2A      | NM_004157    | 150.6924105 | 0.423535099 | 1.59E-19    | 355.7967472 |
| MTMR9LP      | NR_026850    | 81.3256137  | 14.94276029 | 0.000153872 | 5.442475963 |
| RGS2         | NM_002923    | 190.6924105 | 10.66730651 | 1.69E-16    | 17.87634117 |
| CWF19L1      | NM_018294    | 84.18275656 | 1.672532221 | 1.12E-08    | 50.33251706 |
| WDR45B       | NM_019613    | 95.34620525 | 2.680285561 | 1.17E-09    | 35.57315185 |
| EHD2         | NM_014601    | 149.6319195 | 5.997606986 | 4.49E-13    | 24.94860365 |
| CCDC137      | NM_199287    | 185.773493  | 14.01631798 | 3.45E-14    | 13.25408665 |
| TRIM25       | NM_005082    | 215.3462052 | 2.453519079 | 4.32E-24    | 87.7703406  |
| MZT2B        | NM_025029    | 77.67310262 | 10.82978728 | 6.25E-05    | 7.172172508 |
| TBL2         | NM_012453    | 112.4890624 | 6.279002817 | 1.79E-09    | 17.91511577 |
| KLHL20       | NM_014458    | 156.4066962 | 0.75229031  | 3.44E-18    | 207.9073651 |
| MFS1D2       | NM_174983    | 80.79536822 | 1.740527553 | 2.41E-09    | 46.42004552 |
| MRPL41       | NM_032477    | 146.2445312 | 14.66114731 | 3.63E-06    | 9.974971813 |
| VASN         | NM_138440    | 124.713002  | 10.15176182 | 1.44E-09    | 12.28486289 |
| KIAA1919     | NM_153369    | 117.9382254 | 3.473873469 | 7.10E-12    | 33.95006365 |



|             |              |             |             |             |             |
|-------------|--------------|-------------|-------------|-------------|-------------|
| PPID        | NM_005038    | 141.3256137 | 1.988456723 | 2.54E-16    | 71.0730146  |
| PKP3        | NM_007183    | 107.5701449 | 2.005201968 | 1.75E-12    | 53.64554125 |
| WWTR1       | NM_015472    | 96.40669621 | 2.100672627 | 2.58E-09    | 45.89325104 |
| RPRD1A      | NM_018170    | 65.773493   | 1.938790298 | 2.86E-06    | 33.92501658 |
| USP22       | NM_015276    | 124.713002  | 6.664843621 | 2.19E-10    | 18.71206725 |
| HEATR1      | NM_018072    | 35.34620525 | 1.427700128 | 0.003692713 | 24.75744349 |
| ATP5D       | NM_001687    | 95.08108251 | 12.83564879 | 8.86E-06    | 7.407579004 |
| FAM216A     | NM_013300    | 53.01930787 | 3.282799944 | 2.74E-05    | 16.15063628 |
| SLC35F2     | NM_017515    | 100.5302455 | 1.895639494 | 4.98E-10    | 53.03236496 |
| AK1         | NM_000476    | 74.81595977 | 4.416084462 | 6.33E-07    | 16.94169584 |
| RAB20       | NM_017817    | 152.4890624 | 1.471064831 | 2.33E-17    | 103.6589681 |
| NR4A2       | NM_006186    | 130.9575332 | 0.103947986 | 2.57E-21    | 1259.837139 |
| ESPL1       | NM_012291    | 59.5289618  | 3.094052005 | 6.92E-06    | 19.23980648 |
| UFC1        | NM_016406    | 66.24453119 | 10.90498433 | 0.000409373 | 6.0747021   |
| PER2        | NM_022817    | 31.69369417 | 0.24091193  | 0.000300008 | 131.5571802 |
| ARC         | NM_015193    | 209.1016741 | 25.76352305 | 6.58E-13    | 8.116191007 |
| ABCA3       | NM_001089    | 40.26512274 | 0.044022934 | 1.96E-06    | 914.639694  |
| DOCK5       | NM_024940    | 132.4890624 | 1.186633907 | 3.39E-14    | 111.6511686 |
| PEX6        | NM_000287    | 104.1827566 | 8.582054464 | 7.82E-08    | 12.13960561 |
| RNF223      | NM_001205252 | 135.611328  | 6.816725756 | 4.31E-12    | 19.8939099  |
| MALT1       | NM_173844    | 120.2651227 | 0.738999284 | 1.41E-14    | 162.7405132 |
| FAM162A     | NM_014367    | 187.5701449 | 1.508003921 | 1.87E-23    | 124.3830618 |
| SUDS3       | NM_022491    | 49.36679679 | 0.947630218 | 6.89E-06    | 52.0950006  |
| TUSC2       | NM_007275    | 93.54955335 | 5.370906607 | 1.60E-08    | 17.41783282 |
| CDC73       | NM_024529    | 144.713002  | 1.809762467 | 1.72E-14    | 79.96242859 |
| ERO1LB      | NM_019891    | 87.83526763 | 0.176349067 | 6.98E-13    | 498.0761688 |
| COG2        | NM_007357    | 86.77477667 | 0.836644172 | 1.47E-10    | 103.7176611 |
| CCDC57      | NM_198082    | 110.162165  | 4.778015682 | 1.27E-09    | 23.05604928 |
| BIK         | NM_001197    | 120         | 10.16467812 | 2.70E-09    | 11.8055878  |
| TMEM57      | NM_001282564 | 43.91763382 | 1.36742076  | 0.000528207 | 32.11713256 |
| DDRGK1      | NM_023935    | 222.1209819 | 6.127584214 | 5.14E-22    | 36.24935605 |
| RHOT2       | NM_138769    | 46.50965393 | 0.420193314 | 1.32E-06    | 110.6863255 |
| CHD9        | NM_025134    | 77.67310262 | 0.534887086 | 1.29E-08    | 145.2140175 |
| FAM105A     | NM_019018    | 51.95881691 | 1.075000551 | 3.02E-05    | 48.33375839 |
| GINS4       | NM_032336    | 138.2033481 | 3.031875775 | 9.77E-15    | 45.5834468  |
| OSGIN1      | NM_182981    | 205.773493  | 1.665298813 | 5.04E-27    | 123.5655075 |
| STAG3L2     | NR_040584    | 143.9176338 | 4.069882405 | 3.10E-15    | 35.3616197  |
| SELT        | NM_016275    | 156.1415735 | 1.638475383 | 1.04E-18    | 95.29686872 |
| CC2D1A      | NM_017721    | 77.67310262 | 1.184736392 | 1.13E-08    | 65.56150649 |
| SRFBP1      | NM_152546    | 49.10167405 | 0.33480899  | 3.18E-06    | 146.6557815 |
| PTPN9       | NM_002833    | 73.28443061 | 1.17884762  | 2.45E-08    | 62.16616074 |
| MRPS9       | NM_182640    | 103.3873883 | 0.770155754 | 1.11E-12    | 134.2421813 |
| FRAT1       | NM_005479    | 126.7747767 | 1.99616843  | 1.62E-14    | 63.50905804 |
| CDKL2       | NM_003948    | 34.55083703 | 0.289875563 | 0.000180826 | 119.1919618 |
| GRB2        | NM_002086    | 176.4066962 | 2.909197318 | 8.60E-18    | 60.63758381 |
| AP3S1       | NM_001284    | 101.8558592 | 0.781136273 | 1.95E-12    | 130.3944813 |
| TOR4A       | NM_017723    | 90.42728775 | 5.356898549 | 2.98E-08    | 16.8805302  |
| FBXL14      | NM_152441    | 61.06049096 | 0.857493375 | 1.34E-06    | 71.20811981 |
| WBSCR27     | NM_152559    | 175.0810825 | 11.57340402 | 8.74E-14    | 15.12788132 |
| ZCCHC8      | NM_017612    | 107.0398994 | 3.453249288 | 7.07E-10    | 30.99686425 |
| RTN4RL2     | NM_178570    | 71.69369417 | 4.159130573 | 2.31E-06    | 17.23766371 |
| POFUT1      | NM_172236    | 132.7541851 | 3.622679402 | 1.22E-13    | 36.64530321 |
| KPNA2       | NM_002266    | 157.4671872 | 6.582772853 | 1.59E-14    | 23.92110296 |
| LOC646719   | NR_046262    | 184.1827566 | 8.703459431 | 1.78E-16    | 21.16201701 |
| TMEM184C    | NM_018241    | 138.7335936 | 1.71415323  | 4.57E-16    | 80.93418436 |
| NDUFA6      | NM_002490    | 61.06049096 | 14.97690064 | 0.004598388 | 4.076977768 |
| ZNF496      | NM_032752    | 58.2033481  | 2.352597093 | 1.36E-05    | 24.74004082 |
| BAIAP2L1    | NM_018842    | 132.4890624 | 3.043646543 | 8.75E-13    | 43.52971363 |
| CHURC1-FNTB | NM_001202559 | 50.16216501 | 3.088701564 | 0.000111218 | 16.24053472 |
| TUBB6       | NM_032525    | 132.4890624 | 4.346244679 | 3.94E-13    | 30.48357195 |
| RBM42       | NM_024321    | 49.89704227 | 2.441229794 | 2.97E-05    | 20.43930579 |
| NOP56       | NR_027700    | 209.8970423 | 20.309072   | 2.15E-14    | 10.33513704 |
| RUVBL1      | NM_003707    | 123.9176338 | 2.287140405 | 6.94E-13    | 54.18016032 |
| BNIP3       | NM_004052    | 66.50965393 | 1.781302929 | 2.57E-07    | 37.33764362 |

|                |              |             |             |             |             |
|----------------|--------------|-------------|-------------|-------------|-------------|
| PROSER1        | NM_025138    | 84.18275656 | 0.307026319 | 1.92E-12    | 274.1874278 |
| MSH2           | NM_001258281 | 81.59073644 | 0.436683927 | 2.01E-10    | 186.8416292 |
| HADHA          | NM_000182    | 70.42728775 | 1.819138474 | 4.90E-07    | 38.71463813 |
| FSTL1          | NM_007085    | 50.16216501 | 0.613128214 | 2.65E-06    | 81.81349979 |
| TMEM221        | NM_001190844 | 49.89704227 | 2.837225484 | 6.36E-05    | 17.58656214 |
| TOPBP1         | NM_007027    | 67.03989941 | 0.782905585 | 6.74E-08    | 85.62960941 |
| TFAP2C         | NM_003222    | 146.5096539 | 3.065205608 | 6.21E-16    | 47.7976595  |
| EAF2           | NM_018456    | 97.67310262 | 0.036027444 | 4.18E-17    | 2711.075001 |
| CPOX           | NM_000097    | 118.9987163 | 10.66559075 | 8.75E-09    | 11.15725505 |
| C16orf58       | NM_022744    | 66.77477667 | 3.746395111 | 9.70E-06    | 17.82374114 |
| CRTC2          | NM_181715    | 117.4079799 | 3.368683476 | 1.21E-12    | 34.85277876 |
| XPO4           | NM_022459    | 86.50965393 | 0.708635539 | 7.11E-10    | 122.0791919 |
| PIK3CD         | NM_005026    | 61.85585918 | 3.527087156 | 7.41E-06    | 17.53737757 |
| C1QBP          | NM_001212    | 150.4272878 | 6.867887944 | 3.88E-14    | 21.90299099 |
| SPTLC2         | NM_004863    | 80.53024548 | 0.18722001  | 1.07E-10    | 430.1369571 |
| DHRS11         | NM_024308    | 72.22393965 | 4.128812353 | 8.04E-07    | 17.49266701 |
| OSTM1          | NM_014028    | 138.4684708 | 0.535719598 | 3.38E-18    | 258.471916  |
| SMG1P3         | NR_027155    | 170.162165  | 1.772819566 | 1.20E-18    | 95.98391638 |
| MED19          | NM_153450    | 68.10039037 | 6.108101273 | 1.56E-05    | 11.14919143 |
| USPL1          | NM_005800    | 82.38610466 | 1.794476023 | 1.75E-08    | 45.91095317 |
| CCDC174        | NM_016474    | 120.5302455 | 2.601307885 | 2.60E-12    | 46.33447896 |
| XRCC2          | NM_005431    | 123.3873883 | 1.37324439  | 2.77E-14    | 89.85100482 |
| PRDX2          | NM_005809    | 155.0810825 | 15.66420508 | 1.25E-10    | 9.900348068 |
| ABCA1          | NM_005502    | 35.08108251 | 0.179571406 | 0.000285154 | 195.3600698 |
| ADM            | NM_001124    | 203.3873883 | 25.08379395 | 5.63E-12    | 8.108318413 |
| TTPA           | NM_000370    | 83.65251108 | 0.381608155 | 5.38E-11    | 219.210491  |
| COTL1          | NM_021149    | 150.162165  | 3.00816104  | 1.51E-15    | 49.91826002 |
| TMEM43         | NM_024334    | 80.79536822 | 5.390702181 | 4.35E-07    | 14.98791169 |
| ZZEF1          | NM_015113    | 30.16216501 | 0.774274598 | 0.001193983 | 38.95538492 |
| LOC101929431   | NR_120660    | 107.5701449 | 2.384814053 | 5.16E-12    | 45.10630283 |
| NOMO3          | NM_001004067 | 138.9987163 | 1.304512424 | 3.48E-15    | 106.5522365 |
| TMEM42         | NM_144638    | 92.48906239 | 7.413480844 | 1.79E-07    | 12.47579434 |
| DENND3         | NM_014957    | 71.95881691 | 1.623807137 | 5.47E-07    | 44.31487906 |
| EEF1E1-BLOC1S5 | NR_037618    | 115.0810825 | 1.626523469 | 1.61E-11    | 70.75279556 |
| HOXA9          | NM_152739    | 113.2844306 | 21.31282589 | 6.68E-06    | 5.315317226 |
| SFXN1          | NM_022754    | 98.73359358 | 2.272376739 | 4.00E-10    | 43.44948259 |
| ZNF75A         | NM_153028    | 89.63191953 | 2.8995381   | 6.59E-09    | 30.91248207 |
| FAM76B         | NM_144664    | 109.3667968 | 0.694441947 | 2.19E-14    | 157.4887537 |
| MAF1           | NM_032272    | 127.5701449 | 14.87601329 | 9.93E-09    | 8.575560027 |
| PIK3AP1        | NM_152309    | 78.2033481  | 1.383262079 | 2.04E-07    | 56.53545287 |
| SFT2D1         | NM_145169    | 58.2033481  | 2.486072397 | 1.03E-05    | 23.41176716 |
| HDAC3          | NM_003883    | 166.7747767 | 1.978479374 | 1.08E-19    | 84.2944227  |
| HMGN4          | NM_006353    | 86.24453119 | 2.894466597 | 4.31E-09    | 29.79634703 |
| PCGF3          | NM_006315    | 115.3462052 | 2.471471502 | 1.94E-11    | 46.67106424 |
| DDX24          | NM_020414    | 131.9588169 | 2.797931247 | 4.31E-14    | 47.16299482 |
| IER3IP1        | NM_016097    | 83.91763382 | 3.278672969 | 1.25E-07    | 25.59499975 |
| SMYD2          | NM_020197    | 148.8365513 | 0.326556548 | 2.12E-21    | 455.7757374 |
| NPHP3          | NM_153240    | 92.22393965 | 1.557508289 | 1.30E-09    | 59.2124872  |
| KLF13          | NM_015995    | 80.26512274 | 3.306987978 | 9.87E-08    | 24.27136817 |
| FAM50A         | NM_004699    | 49.10167405 | 0.890488841 | 3.26E-06    | 55.14013405 |
| CALR           | NM_004343    | 183.3873883 | 6.466021081 | 7.55E-18    | 28.36170592 |
| CYP2U1         | NM_183075    | 98.46847084 | 0.14425586  | 3.17E-15    | 682.5959859 |
| PLD6           | NM_178836    | 75.08108251 | 0.734924676 | 7.18E-10    | 102.1616023 |
| MET            | NM_000245    | 55.08108251 | 3.519228864 | 5.85E-05    | 15.65146361 |
| ZNF396         | NM_145756    | 49.10167405 | 1.889453794 | 2.97E-05    | 25.98723198 |
| RPS3A          | NM_001267699 | 155.3462052 | 9.317005788 | 3.92E-13    | 16.67340439 |
| PRH1-PRR4      | NR_037918    | 135.0810825 | 0.373962306 | 2.99E-15    | 361.215771  |
| LOC389831      | NM_001242480 | 256.6718189 | 2.780201384 | 2.71E-27    | 92.32130464 |
| MOAP1          | NM_022151    | 146.5096539 | 9.084959189 | 4.13E-12    | 16.12661663 |
| GNPTG          | NM_032520    | 67.03989941 | 2.20305726  | 2.57E-07    | 30.43039355 |
| ZBTB7C         | NM_001039360 | 57.67310262 | 0.812053234 | 1.49E-06    | 71.02133231 |
| DUSP11         | NM_003584    | 149.3667968 | 2.116932365 | 8.21E-17    | 70.55813366 |
| SLC25A33       | NM_032315    | 160.5302455 | 2.455937742 | 3.98E-17    | 65.36413474 |
| SCAND2P        | NR_003654    | 81.06049096 | 7.786738629 | 8.32E-06    | 10.41006958 |

|               |              |             |             |             |             |
|---------------|--------------|-------------|-------------|-------------|-------------|
| FAM210B       | NM_080821    | 91.42857143 | 4.773965248 | 3.28E-08    | 19.15149497 |
| SPCS1         | NM_014041    | 109.1016741 | 13.67514916 | 1.24E-06    | 7.978097556 |
| PCSK7         | NM_004716    | 89.36679679 | 4.057938204 | 6.09E-08    | 22.02271013 |
| FOSB          | NM_001114171 | 86.50965393 | 11.59733493 | 8.11E-06    | 7.459442576 |
| LAPTM4A       | NM_014713    | 109.3667968 | 0.746912025 | 2.19E-14    | 146.4252726 |
| CYSRT1        | NM_199001    | 43.38738834 | 5.252202773 | 0.002938975 | 8.260798414 |
| TSEN54        | NM_207346    | 95.34620525 | 11.11874465 | 1.34E-06    | 8.575267103 |
| SLC35F6       | NM_017877    | 121.8558592 | 7.037813835 | 9.44E-11    | 17.31444764 |
| TTBK2         | NM_173500    | 93.54955335 | 0.521277895 | 7.36E-11    | 179.461961  |
| ZNF280C       | NM_017666    | 101.060491  | 0.268922834 | 6.47E-14    | 375.7973599 |
| AHR           | NM_001621    | 178.2033481 | 1.366517473 | 2.24E-20    | 130.4069298 |
| DKFZP434I0714 | NR_033797    | 93.01930787 | 8.510327783 | 2.29E-07    | 10.93016747 |
| LOC100379224  | NR_033341    | 29.89704227 | 1.199929067 | 0.00453202  | 24.91567468 |
| FBXO46        | NM_001080469 | 75.61132799 | 6.304774244 | 1.11E-05    | 11.99270982 |
| MORC3         | NM_015358    | 61.3256137  | 2.126504604 | 9.72E-06    | 28.83869312 |
| CA8           | NM_004056    | 109.6319195 | 0.031835096 | 1.20E-18    | 3443.743921 |
| CTSD          | NM_001909    | 35.08108251 | 2.67355307  | 0.002338344 | 13.12152091 |
| PYURF         | NM_032906    | 187.5701449 | 10.21949614 | 5.29E-16    | 18.35414802 |
| THOC3         | NM_032361    | 124.4478793 | 4.959098    | 1.55E-12    | 25.09486187 |
| FAM102A       | NM_001035254 | 107.5701449 | 4.928430608 | 1.02E-09    | 21.82645013 |
| OXSR1         | NM_005109    | 143.6525111 | 1.748987147 | 1.37E-14    | 82.13468652 |
| RBM33         | NM_053043    | 115.0810825 | 1.283592401 | 2.25E-11    | 89.65547195 |
| H3F3B         | NM_005324    | 219.7940845 | 29.51286665 | 7.92E-13    | 7.447398693 |
| APPL1         | NM_012096    | 115.8764507 | 0.621826022 | 3.28E-14    | 186.3486678 |
| SPIRE2        | NM_032451    | 78.2033481  | 3.405967786 | 1.74E-07    | 22.96068343 |
| TYMSOS        | NM_001012716 | 169.3667968 | 12.19126695 | 1.41E-13    | 13.89246888 |
| MEX3C         | NM_016626    | 37.67310262 | 3.659874372 | 0.001944616 | 10.29355076 |
| NUDT16L1      | NM_032349    | 73.01930787 | 14.49166404 | 0.000523636 | 5.03871106  |
| RPL11         | NM_000975    | 89.89704227 | 15.02759347 | 3.32E-05    | 5.982131634 |
| MAGEE1        | NM_020932    | 94.28571429 | 5.300212514 | 2.41E-08    | 17.78904412 |
| ARSJ          | NM_024590    | 68.83655131 | 0.092962527 | 1.84E-10    | 740.4763386 |
| POLA1         | NM_016937    | 54.28571429 | 0.562134703 | 4.57E-06    | 96.57065113 |
| GPR157        | NM_024980    | 145.7142857 | 2.449156977 | 2.47E-15    | 59.4956906  |
| FAM188B       | NM_032222    | 66.50965393 | 0.734764571 | 1.54E-07    | 90.51831915 |
| DECR1         | NM_001359    | 132.4890624 | 1.567591494 | 3.49E-14    | 84.5175946  |
| RNMTL1        | NM_018146    | 106.2445312 | 8.355113735 | 1.81E-08    | 12.71610831 |
| CCDC122       | NM_144974    | 92.22393965 | 1.04760186  | 5.20E-10    | 88.03338669 |
| TMTC3         | NM_181783    | 78.73359358 | 0.785716567 | 9.05E-10    | 100.2061008 |
| SPDL1         | NM_017785    | 46.50965393 | 0.144021208 | 1.95E-07    | 322.9361463 |
| USP45         | NM_001080481 | 197.9382254 | 0.866495959 | 1.20E-22    | 228.4352551 |
| TNFRSF10A     | NM_003844    | 115.8764507 | 2.329805588 | 1.75E-12    | 49.73653222 |
| SMKR1         | NM_001195243 | 83.91763382 | 2.780256873 | 1.62E-08    | 30.18341025 |
| VPS4A         | NM_013245    | 127.0398994 | 10.85963803 | 2.28E-09    | 11.69835487 |
| EHD4          | NM_139265    | 161.3256137 | 2.007579877 | 1.29E-16    | 80.358254   |
| B4GALT7       | NM_007255    | 181.5907364 | 11.69583255 | 6.37E-15    | 15.52610604 |
| LRRC58        | NM_001099678 | 210.162165  | 1.095053864 | 3.09E-28    | 191.9194771 |
| BFAR          | NM_016561    | 35.87645073 | 3.632683712 | 0.002198961 | 9.876018274 |
| SNX27         | NM_030918    | 103.9176338 | 0.584504761 | 1.46E-12    | 177.7874891 |
| APLF          | NM_173545    | 108.8365513 | 0.119778594 | 6.65E-16    | 908.6477624 |
| TXNDC17       | NM_032731    | 138.4684708 | 21.39363267 | 6.74E-08    | 6.472415087 |
| WIPF3         | NM_001080529 | 81.06049096 | 1.164121901 | 5.40E-09    | 69.63230476 |
| SARS          | NR_034072    | 134.3449216 | 12.25995739 | 4.48E-10    | 10.95802516 |
| DKK1          | NM_012242    | 244.1827566 | 23.98692743 | 2.75E-16    | 10.17982638 |
| ITFG2         | NM_018463    | 104.713002  | 2.969860676 | 3.81E-11    | 35.25855704 |
| C14orf142     | NM_032490    | 116.6718189 | 2.066193968 | 6.84E-14    | 56.46702136 |
| TUBB2A        | NM_001069    | 117.9382254 | 10.76427115 | 9.99E-09    | 10.95645248 |
| SAPCD2        | NM_178448    | 143.3873883 | 11.46064688 | 5.90E-11    | 12.51128229 |
| MAP3K14       | NM_003954    | 132.2239396 | 3.395728557 | 3.38E-13    | 38.93831248 |
| ROR2          | NM_004560    | 106.7747767 | 0.706995962 | 9.63E-12    | 151.0260064 |
| IFT57         | NM_018010    | 35.34620525 | 0.872185687 | 0.000454151 | 40.52600928 |
| LOC389247     | NR_033995    | 82.85714286 | 0.298083337 | 1.01E-12    | 277.9663692 |
| SIX5          | NM_175875    | 143.6525111 | 17.58101645 | 6.26E-09    | 8.170887701 |
| PAK1IP1       | NM_017906    | 103.3873883 | 1.113468603 | 3.00E-13    | 92.85164219 |
| TOE1          | NM_025077    | 147.0398994 | 19.98593132 | 1.38E-08    | 7.357170253 |

|              |              |             |             |             |             |
|--------------|--------------|-------------|-------------|-------------|-------------|
| ATP6V1B2     | NM_001693    | 107.3050222 | 2.625653391 | 1.05E-11    | 40.8679312  |
| LOC100288748 | NR_034034    | 174.875167  | 32.63157117 | 3.16E-08    | 5.359078978 |
| CCDC109B     | NM_017918    | 129.8970423 | 0.249522038 | 6.53E-17    | 520.5834448 |
| COX6A1       | NM_004373    | 110.4272878 | 4.159774137 | 4.81E-11    | 26.54646241 |
| ARHGAP18     | NM_033515    | 89.10167405 | 2.981350887 | 2.28E-08    | 29.88634261 |
| MYH7B        | NM_020884    | 109.8970423 | 3.160899128 | 6.95E-11    | 34.76765244 |
| C6orf57      | NM_145267    | 153.0193079 | 1.962944135 | 3.27E-17    | 77.95398001 |
| TRUB2        | NM_015679    | 97.93822536 | 1.547977257 | 5.45E-12    | 63.26851699 |
| ZBTB25       | NM_006977    | 93.54955335 | 3.188141076 | 3.40E-09    | 29.34297797 |
| TMEM261      | NM_033428    | 63.38738834 | 4.003139992 | 2.24E-05    | 15.8344171  |
| C11orf1      | NM_022761    | 61.3256137  | 7.496947185 | 0.000291136 | 8.180078129 |
| KLHL26       | NM_018316    | 60.53024548 | 1.043356378 | 2.60E-06    | 58.0149283  |
| C19orf24     | NM_017914    | 123.3873883 | 21.30237418 | 1.66E-06    | 5.792189513 |
| ATG2A        | NM_015104    | 130.6924105 | 0.377674898 | 2.62E-19    | 346.0447366 |
| FAHD2CP      | NR_003698    | 141.5907364 | 4.473780134 | 3.56E-14    | 31.64901542 |
| FMNL2        | NM_052905    | 121.5907364 | 1.432883555 | 8.76E-12    | 84.8573745  |
| C6orf147     | NR_027005    | 141.3256137 | 3.312466405 | 1.56E-13    | 42.66476891 |
| DYRK3        | NM_003582    | 137.6731026 | 0.493909129 | 1.42E-20    | 278.7417656 |
| ERGIC1       | NM_001031711 | 43.38738834 | 2.347002744 | 0.00070143  | 18.48629638 |
| LDLRAP1      | NM_015627    | 192.4890624 | 3.969032522 | 7.52E-20    | 48.49772869 |
| PPP5D1       | NM_001205281 | 26.24453119 | 0.874726115 | 0.004922171 | 30.00314125 |
| IFT52        | NM_016004    | 107.0398994 | 0.760094263 | 3.41E-13    | 140.8245065 |
| IDII         | NM_004508    | 67.03989941 | 5.692052681 | 3.15E-05    | 11.77780727 |
| ZXDB         | NM_007157    | 51.95881691 | 6.80019172  | 0.000693742 | 7.640787062 |
| IFNGR1       | NM_000416    | 110.9575332 | 0.60257226  | 5.52E-15    | 184.1397964 |
| KIF18A       | NM_031217    | 35.87645073 | 0.119009357 | 3.96E-05    | 301.4590744 |
| THAP2        | NM_031435    | 80.53024548 | 4.240111876 | 2.67E-07    | 18.99248129 |
| BSN-AS2      | NR_038866    | 33.01930787 | 1.384096657 | 0.000581095 | 23.85621532 |
| HDHD2        | NM_032124    | 163.9176338 | 1.345184058 | 9.10E-19    | 121.8551713 |
| FAM86DP      | NR_024241    | 132.2239396 | 3.129482539 | 3.18E-14    | 42.25105525 |
| NUCKS1       | NM_022731    | 40.53024548 | 2.697317337 | 0.001059083 | 15.02613168 |
| PSMA2        | NM_002787    | 61.06049096 | 0.665541235 | 1.83E-07    | 91.74561651 |
| GPR89B       | NM_016334    | 164.4478793 | 0.627220795 | 4.47E-20    | 262.1849922 |
| C11orf84     | NM_138471    | 49.10167405 | 2.920850975 | 7.27E-05    | 16.81074264 |
| SLBP         | NM_006527    | 101.060491  | 2.713401384 | 6.54E-10    | 37.24494708 |
| SBF1         | NM_002972    | 34.55083703 | 3.540915715 | 0.003979482 | 9.75599391  |
| ARL2-SNX15   | NR_037650    | 83.65251108 | 5.141153653 | 3.07E-07    | 16.27115561 |
| SMG7-AS1     | NR_040063    | 104.713002  | 3.289632798 | 3.81E-11    | 31.83121293 |
| GMPS         | NM_003875    | 125.9794085 | 1.085042222 | 1.30E-13    | 116.1055357 |
| PRR34-AS1    | NR_027034    | 49.36679679 | 6.650734174 | 0.001112282 | 7.422758977 |
| BMS1P20      | NR_027293    | 95.34620525 | 0.143237805 | 2.55E-14    | 665.6497253 |
| IRF1         | NM_002198    | 206.2445312 | 2.182024317 | 2.84E-26    | 94.51981338 |
| TMEM144      | NM_018342    | 75.34620525 | 1.599544589 | 1.59E-07    | 47.10478579 |
| NIPAL1       | NM_207330    | 187.8352676 | 1.348265855 | 1.76E-23    | 139.3161941 |
| REXO1        | NM_020695    | 46.50965393 | 2.548379593 | 0.000253051 | 18.25067744 |
| UCK2         | NM_012474    | 131.6936942 | 2.251303172 | 3.64E-13    | 58.49665021 |
| ST14         | NM_021978    | 112.2239396 | 1.546254461 | 8.40E-12    | 72.57792458 |
| TOX4         | NM_014828    | 41.06049096 | 2.890246601 | 0.00087604  | 14.2065701  |
| SPTY2D1      | NM_194285    | 95.34620525 | 2.147929633 | 4.87E-10    | 44.38981788 |
| MTCP1        | NM_001018025 | 60          | 2.147204422 | 3.64E-06    | 27.94331057 |
| WNT9A        | NM_003395    | 120.2651227 | 3.643029202 | 1.53E-11    | 33.01239603 |
| ZNF740       | NM_001004304 | 71.95881691 | 9.651082925 | 6.52E-05    | 7.456035501 |
| NEU3         | NM_006656    | 129.6319195 | 2.345374243 | 8.34E-14    | 55.27131541 |
| SQLE         | NM_003129    | 94.34492157 | 0.550124682 | 2.50E-12    | 171.4973435 |
| HNRNPA0      | NM_006805    | 166.5096539 | 15.29774522 | 6.18E-12    | 10.88458799 |
| PAPSS1       | NM_005443    | 109.1016741 | 1.708100209 | 9.81E-11    | 63.87311087 |
| TMSB4X       | NM_021109    | 83.91763382 | 8.76299568  | 7.06E-06    | 9.576363709 |
| ATP6AP1      | NM_001183    | 55.87645073 | 0.994970994 | 2.87E-07    | 56.15887404 |
| MED28        | NM_025205    | 115.3462052 | 1.590557065 | 5.22E-14    | 72.51937561 |
| RNF126       | NM_194460    | 94.81595977 | 2.244389845 | 1.04E-09    | 42.24576224 |
| DDX50        | NM_024045    | 155.611328  | 2.088637325 | 1.22E-16    | 74.50375712 |
| ARPP19       | NM_006628    | 126.7747767 | 2.10456415  | 1.95E-14    | 60.23801967 |
| RNF123       | NM_022064    | 134.550837  | 7.018518088 | 2.13E-11    | 19.17083284 |
| FLJ36777     | NR_027441    | 137.6731026 | 3.321635882 | 5.98E-15    | 41.4473794  |

|              |              |             |             |             |             |
|--------------|--------------|-------------|-------------|-------------|-------------|
| CBX6         | NM_014292    | 71.42857143 | 5.875488774 | 6.47E-06    | 12.1570433  |
| SPPL2A       | NM_032802    | 214.8159598 | 0.706939491 | 5.76E-27    | 303.8675339 |
| ATP6V0E1     | NM_003945    | 88.10039037 | 2.508017629 | 8.92E-09    | 35.12750044 |
| LRRK1        | NM_024652    | 43.1222656  | 0.069611318 | 5.54E-06    | 619.4720488 |
| ISY1-RAB43   | NM_001204890 | 46.77477667 | 1.509530869 | 0.000287331 | 30.9863002  |
| RNASEH2A     | NM_006397    | 93.01930787 | 6.264701951 | 6.77E-08    | 14.84816175 |
| THBS1        | NM_003246    | 123.9176338 | 2.629962595 | 4.13E-13    | 47.11764116 |
| ZNF572       | NM_152412    | 135.611328  | 7.799305887 | 7.32E-12    | 17.387615   |
| TRIP11       | NM_004239    | 60.26512274 | 1.051244842 | 6.02E-07    | 57.32738971 |
| MCOLN2       | NM_153259    | 121.060491  | 1.117723456 | 8.60E-13    | 108.3098778 |
| C19orf43     | NM_024038    | 149.6319195 | 7.49382746  | 3.05E-13    | 19.96735584 |
| PDAP1        | NM_014891    | 89.89704227 | 10.45004507 | 2.23E-06    | 8.602550672 |
| ST7-OT4      | NR_002329    | 61.59073644 | 1.483905194 | 3.16E-07    | 41.50584329 |
| TEFM         | NM_024683    | 113.8146761 | 6.163531121 | 2.98E-10    | 18.46582322 |
| VPS25        | NM_032353    | 122.3861047 | 5.172347162 | 5.75E-12    | 23.66161838 |
| THAP6        | NM_144721    | 122.1209819 | 2.691738979 | 3.73E-13    | 45.3688054  |
| FADD         | NM_003824    | 115.8764507 | 21.44048287 | 2.71E-06    | 5.40456348  |
| RPS8         | NM_001012    | 196.1415735 | 18.39931644 | 8.61E-14    | 10.66026415 |
| USP35        | NM_020798    | 58.2033481  | 0.550241855 | 7.98E-08    | 105.7777549 |
| ZNF720       | NM_001130913 | 145.9794085 | 0.02218827  | 1.12E-26    | 6579.125363 |
| VEZFI        | NM_007146    | 48.57142857 | 2.146239532 | 6.16E-05    | 22.63094489 |
| KLC3         | NM_177417    | 104.4478793 | 11.89808329 | 1.70E-07    | 8.778546661 |
| WDR61        | NM_025234    | 111.9588169 | 4.290190579 | 6.22E-11    | 26.09646701 |
| KIAA1279     | NM_015634    | 102.3861047 | 0.093017449 | 1.26E-17    | 1100.719334 |
| IK           | NM_006083    | 55.34620525 | 0.179355701 | 9.07E-08    | 308.5834729 |
| CPNE2        | NM_152727    | 43.1222656  | 1.301252785 | 0.000467315 | 33.13903807 |
| BOP1         | NM_015201    | 154.8159598 | 3.687074675 | 2.52E-15    | 41.98883218 |
| SETD2        | NM_014159    | 94.81595977 | 0.336048027 | 1.64E-11    | 282.1500265 |
| TEN1         | NM_001113324 | 70.69241049 | 4.082984035 | 3.01E-06    | 17.31390813 |
| APOBEC3C     | NM_014508    | 81.85585918 | 5.592777903 | 3.58E-07    | 14.63599317 |
| NRBP1        | NM_013392    | 155.0810825 | 8.341111984 | 2.00E-13    | 18.59237507 |
| GET4         | NM_015949    | 118.2033481 | 3.492534508 | 1.26E-11    | 33.84457558 |
| GTPBP4       | NM_012341    | 89.89704227 | 1.207052496 | 5.92E-10    | 74.47649754 |
| SLC45A1      | NM_001080397 | 83.91763382 | 1.997030424 | 8.29E-09    | 42.02120949 |
| MAP6D1       | NM_024871    | 92.22393965 | 5.366329396 | 4.45E-08    | 17.18566507 |
| LOC101926913 | NR_110185    | 54.81595977 | 0.842220341 | 2.19E-06    | 65.08505801 |
| CDK17        | NM_002595    | 92.48906239 | 1.115941149 | 3.00E-10    | 82.87987451 |
| MKX-AS1      | NR_121652    | 35.34620525 | 0.159127862 | 2.87E-05    | 222.1245535 |
| IPO13        | NM_014652    | 107.0398994 | 2.304889058 | 9.70E-12    | 46.44036947 |
| TUBG2        | NM_016437    | 162.3861047 | 12.13957525 | 1.81E-12    | 13.37658866 |
| YY1          | NM_003403    | 85.97940845 | 4.254695713 | 1.97E-07    | 20.20812163 |
| SLC16A9      | NM_194298    | 92.48906239 | 0.351283519 | 2.31E-12    | 263.2889312 |
| LRRC40       | NM_017768    | 77.67310262 | 0.511145338 | 8.48E-10    | 151.9589378 |
| MDGA1        | NM_153487    | 63.38738834 | 1.998647054 | 5.17E-06    | 31.71514861 |
| CRISPLD2     | NM_031476    | 173.8146761 | 1.20720175  | 8.60E-19    | 143.9814647 |
| CHST3        | NM_004273    | 50.42728775 | 2.857933532 | 8.22E-05    | 17.6446678  |
| NTSR1        | NM_002531    | 109.3667968 | 14.34996583 | 3.86E-07    | 7.621397718 |
| KCNQ1OT1     | NR_002728    | 117.9382254 | 1.650798808 | 8.53E-12    | 71.44312488 |
| HIST2H2BC    | NR_036461    | 97.67310262 | 15.2255476  | 0.002547409 | 6.415079783 |
| NAGLU        | NM_000263    | 89.89704227 | 10.62690425 | 4.79E-06    | 8.459381973 |
| GBA2         | NM_020944    | 121.8558592 | 8.451307113 | 4.16E-10    | 14.41858136 |
| KDM5A        | NM_001042603 | 76.14157347 | 1.516738483 | 1.94E-07    | 50.20085818 |
| TSTA3        | NM_003313    | 173.2844306 | 9.530269886 | 2.19E-15    | 18.18253131 |
| PHF13        | NM_153812    | 71.95881691 | 6.843868968 | 1.18E-05    | 10.51434755 |
| TRIM6-TRIM34 | NM_001003819 | 27.03989941 | 0.743216629 | 0.00372169  | 36.38225836 |
| RRP7B        | NR_002184    | 132.7541851 | 6.372828801 | 5.89E-12    | 20.83128062 |
| CEP250       | NM_007186    | 87.30502215 | 0.436830428 | 1.13E-11    | 199.8602127 |
| PHKA2        | NM_000292    | 80.53024548 | 0.396189698 | 5.22E-10    | 203.2618364 |
| RPL18A       | NM_000980    | 130.4272878 | 13.18333903 | 4.01E-09    | 9.893342459 |
| LOC101927211 | NR_110742    | 37.67310262 | 0.884117741 | 0.00020276  | 42.61095651 |
| RECK         | NM_021111    | 150.162165  | 0.853628046 | 9.30E-17    | 175.9105336 |
| PRRX2        | NM_016307    | 49.10167405 | 2.600928489 | 0.000164031 | 18.87851752 |
| CXCL2        | NM_002089    | 106.5096539 | 6.664257405 | 1.69E-08    | 15.98222389 |
| CEP83-AS1    | NR_027035    | 121.5907364 | 4.997714779 | 8.17E-12    | 24.32926684 |

|              |              |             |             |             |             |
|--------------|--------------|-------------|-------------|-------------|-------------|
| FUBP3        | NM_003934    | 100.7953682 | 1.971573006 | 4.12E-10    | 51.12433977 |
| ZMPSTE24     | NM_005857    | 117.9382254 | 1.488924412 | 4.80E-13    | 79.21035107 |
| ATAD5        | NM_024857    | 74.55083703 | 1.432412943 | 2.14E-07    | 52.0456321  |
| L3MBTL2      | NM_031488    | 47.57014489 | 2.64874623  | 0.000110779 | 17.95949508 |
| LINC00662    | NR_027301    | 107.3050222 | 11.6000667  | 2.84E-07    | 9.250379758 |
| SP140L       | NM_138402    | 44.18275656 | 0.052412642 | 1.04E-06    | 842.9789977 |
| LATS2        | NM_014572    | 98.73359358 | 2.581922204 | 1.03E-09    | 38.24034412 |
| B3GNT2       | NM_006577    | 172.4890624 | 3.060404058 | 9.82E-18    | 56.36153237 |
| PHLPP1       | NM_194449    | 46.24453119 | 0.682000784 | 3.91E-05    | 67.80715259 |
| CWC15        | NM_016403    | 75.61132799 | 0.648222155 | 3.76E-10    | 116.6441589 |
| VAMP3        | NM_004781    | 35.08108251 | 1.013983273 | 0.00089422  | 34.59729903 |
| PARP1        | NM_001618    | 158.2033481 | 1.654761389 | 2.29E-17    | 95.60493083 |
| SFXN2        | NM_178858    | 96.40669621 | 2.004200617 | 1.26E-10    | 48.10231838 |
| DYNC1L1      | NM_016141    | 122.8571429 | 1.071638155 | 6.05E-14    | 114.6442409 |
| WFDC21P      | NR_030732    | 31.95881691 | 1.98762396  | 0.001919256 | 16.07890504 |
| DARS-AS1     | NR_110200    | 130.9575332 | 2.718159628 | 9.70E-14    | 48.17875003 |
| ATP8B1       | NM_005603    | 41.06049096 | 1.185188213 | 0.000160663 | 34.64470073 |
| DOT1L        | NM_032482    | 54.55083703 | 3.076307204 | 4.92E-05    | 17.73257136 |
| PUS3         | NM_031307    | 84.4478793  | 5.345926162 | 1.93E-07    | 15.79667895 |
| LOC100130691 | NR_026966    | 84.18275656 | 0.923631439 | 1.88E-09    | 91.14323418 |
| WWC2         | NM_024949    | 72.22393965 | 1.057468298 | 7.65E-08    | 68.29891712 |
| LSM7         | NM_016199    | 92.48906239 | 5.696469767 | 2.27E-08    | 16.23620702 |
| DENND6A      | NM_152678    | 173.2844306 | 0.210459382 | 2.39E-26    | 823.3628203 |
| LOC101926895 | NR_120372    | 83.91763382 | 2.558642445 | 6.68E-08    | 32.79771818 |
| SEMA3C       | NM_006379    | 49.36679679 | 0.407454195 | 1.21E-05    | 121.1591324 |
| LGALS3BP     | NM_005567    | 153.8146761 | 6.237668146 | 8.62E-15    | 24.65900277 |
| AAK1         | NM_014911    | 120.7953682 | 0.53538129  | 7.98E-14    | 225.6249339 |
| AKIRIN2      | NM_018064    | 109.3667968 | 3.857653432 | 3.70E-10    | 28.35060192 |
| ILKAP        | NM_030768    | 106.2445312 | 3.062480461 | 7.22E-11    | 34.69231316 |
| LINC00482    | NR_038080    | 71.22265597 | 9.386937355 | 3.78E-05    | 7.587422103 |
| KLHL18       | NM_025010    | 89.10167405 | 0.153283806 | 3.37E-13    | 581.2856328 |
| SLC25A43     | NM_145305    | 97.40797988 | 1.133387211 | 2.39E-10    | 85.94413182 |
| TXNL4A       | NM_006701    | 137.6731026 | 3.218032951 | 1.18E-14    | 42.78175666 |
| BHLHE40      | NM_003670    | 46.50965393 | 3.457959777 | 0.000360501 | 13.45002745 |
| RPS12        | NM_001016    | 209.1016741 | 18.64480652 | 1.08E-14    | 11.21500906 |
| C19orf10     | NM_019107    | 55.61132799 | 2.586056824 | 1.13E-05    | 21.50429467 |
| FEM1B        | NM_015322    | 157.4079799 | 5.749648255 | 9.70E-15    | 27.37697558 |
| EAPP         | NM_018453    | 109.8970423 | 0.275085752 | 4.38E-16    | 399.5010338 |
| GFER         | NM_005262    | 123.1222656 | 9.031670096 | 7.71E-10    | 13.6322811  |
| DLAT         | NM_001931    | 123.1222656 | 2.887765832 | 1.04E-12    | 42.63582048 |
| FAM127A      | NM_001078171 | 105.7142857 | 5.70188093  | 2.66E-08    | 18.54024786 |
| ORAI3        | NM_152288    | 137.9382254 | 22.7124699  | 9.09E-08    | 6.073237563 |
| RAD51-AS1    | NR_040058    | 103.9176338 | 23.31874985 | 0.000311579 | 4.456398155 |
| ANXA4        | NM_001153    | 151.9588169 | 2.7258455   | 3.85E-15    | 55.74740641 |
| TGS1         | NM_024831    | 201.5907364 | 2.608491005 | 1.08E-21    | 77.28251163 |
| KIAA1377     | NM_020802    | 59.26383906 | 0.35522427  | 1.60E-07    | 166.8349942 |
| DCPS         | NM_014026    | 172.4890624 | 3.625427452 | 1.02E-16    | 47.57757938 |
| ACAA2        | NM_006111    | 109.3667968 | 0.076531984 | 3.56E-19    | 1429.033862 |
| JPX          | NR_024582    | 52.22393965 | 0.505511877 | 5.13E-06    | 103.309026  |
| NKX2-8       | NM_014360    | 101.060491  | 6.821448169 | 4.15E-08    | 14.81510794 |
| FNBP4        | NM_015308    | 89.10167405 | 2.580482188 | 9.16E-09    | 34.52907928 |
| INO80D       | NM_017759    | 55.61132799 | 0.717909026 | 2.44E-06    | 77.46291791 |
| PGAM1        | NM_002629    | 92.48906239 | 8.756480918 | 3.22E-07    | 10.56235527 |
| TRMT61A      | NM_152307    | 72.48906239 | 5.605712753 | 6.00E-06    | 12.93128378 |
| NT5M         | NM_020201    | 125.9794085 | 0.793749845 | 6.12E-15    | 158.7142464 |
| OARD1        | NM_145063    | 109.3667968 | 10.52878741 | 6.84E-08    | 10.38740669 |
| ANKRD52      | NM_173595    | 115.611328  | 2.103008796 | 5.08E-13    | 54.97424843 |
| ETHE1        | NM_014297    | 183.9176338 | 4.521923168 | 5.54E-18    | 40.6724367  |
| CCDC25       | NM_018246    | 121.5907364 | 1.206734145 | 5.54E-14    | 100.760169  |
| LOC284080    | NR_038230    | 162.3861047 | 23.8452041  | 1.02E-09    | 6.810011103 |
| TRIM59       | NM_173084    | 175.8764507 | 4.488137817 | 3.55E-18    | 39.18695412 |
| PLK3         | NM_004073    | 204.4478793 | 16.51313869 | 2.87E-15    | 12.38092183 |
| CBR4         | NM_032783    | 127.5701449 | 2.339507662 | 1.55E-14    | 54.5286288  |
| ZNF215       | NM_013250    | 89.63191953 | 0.839325524 | 2.33E-10    | 106.7904133 |

|              |              |             |             |             |             |
|--------------|--------------|-------------|-------------|-------------|-------------|
| EIF3E        | NM_001568    | 88.36551311 | 3.393175874 | 1.14E-08    | 26.04212584 |
| HS3ST3B1     | NM_006041    | 91.95881691 | 0.66752231  | 8.41E-12    | 137.7614134 |
| SLC35E3      | NM_018656    | 166.7747767 | 1.254016256 | 1.45E-21    | 132.9925158 |
| CDKN2AIP     | NM_017632    | 55.08108251 | 0.996166263 | 7.53E-07    | 55.29306156 |
| MTCH2        | NM_014342    | 103.9176338 | 3.377948606 | 1.03E-09    | 30.76353312 |
| PAFAH2       | NM_000437    | 32.75418513 | 0.862705284 | 0.000759886 | 37.9668303  |
| SNTB2        | NM_006750    | 126.5096539 | 0.428060387 | 1.64E-15    | 295.5416052 |
| ANKDD1A      | NM_182703    | 155.8764507 | 1.859500927 | 3.78E-17    | 83.82703576 |
| GLB1L2       | NM_138342    | 54.28571429 | 1.01960147  | 1.75E-05    | 53.24209105 |
| CNTNAP3B     | NM_001201380 | 46.24453119 | 0.662889831 | 3.74E-05    | 69.76201628 |
| TMEM238      | NM_001190764 | 80.26512274 | 9.216131926 | 1.15E-05    | 8.709198543 |
| PARM1        | NM_015393    | 147.0398994 | 0.707726802 | 3.24E-17    | 207.7636441 |
| ELOF1        | NM_032377    | 116.6718189 | 2.491276607 | 1.81E-13    | 46.83214165 |
| MFSD6        | NM_017694    | 74.28571429 | 0.971254806 | 1.60E-08    | 76.48426947 |
| CCDC28A      | NM_015439    | 33.54955335 | 1.780781331 | 0.002619399 | 18.83979396 |
| DNAJB2       | NM_001039550 | 106.2445312 | 8.112192726 | 8.04E-09    | 13.09689436 |
| UXT-AS1      | NR_028119    | 51.95881691 | 3.541886293 | 0.000688262 | 14.66981507 |
| SMC5         | NM_015110    | 186.5096539 | 0.617056964 | 3.17E-23    | 302.2567847 |
| S100A11      | NM_005620    | 120.2651227 | 11.24794929 | 9.50E-09    | 10.69218216 |
| PXDC1        | NM_183373    | 89.63191953 | 1.780078398 | 1.72E-09    | 50.35279325 |
| STRN         | NM_003162    | 149.1016741 | 0.245313559 | 8.82E-20    | 607.8003795 |
| VCPIP1       | NM_025054    | 87.57014489 | 1.483378156 | 1.88E-09    | 59.03426886 |
| C1orf74      | NM_152485    | 177.9382254 | 3.566691768 | 3.67E-18    | 49.88887096 |
| FAM208B      | NM_017782    | 74.55083703 | 1.62789736  | 3.13E-07    | 45.7957847  |
| FZD4         | NM_012193    | 189.1016741 | 2.213390237 | 2.94E-23    | 85.43530685 |
| FRMPD1       | NM_014907    | 31.95881691 | 0.464600141 | 0.000885111 | 68.78778999 |
| STAMBPL1     | NM_020799    | 107.5701449 | 1.776503197 | 1.71E-11    | 60.55161909 |
| DPY19L1      | NM_015283    | 188.5714286 | 0.391305073 | 1.20E-24    | 481.9038683 |
| PSMB7        | NM_002799    | 75.08108251 | 1.724908855 | 2.59E-07    | 43.52756511 |
| KCNG1        | NM_002237    | 221.060491  | 4.649020811 | 1.44E-22    | 47.54990351 |
| EIF3M        | NM_006360    | 113.0193079 | 2.888517438 | 1.23E-11    | 39.12709904 |
| GPBP1L1      | NM_021639    | 85.24324752 | 1.552104577 | 1.15E-08    | 54.92107219 |
| TRIM8        | NM_030912    | 94.07979883 | 11.51313588 | 2.73E-06    | 8.171518152 |
| LINC00574    | NR_026780    | 33.01930787 | 1.738668634 | 0.001919395 | 18.99114484 |
| DYM          | NM_017653    | 115.3462052 | 0.21691044  | 2.94E-13    | 531.7688047 |
| SRGAP1       | NM_020762    | 29.89704227 | 0.695152084 | 0.002670838 | 43.00791574 |
| EIF2S3       | NM_001415    | 54.55083703 | 3.075077627 | 2.77E-05    | 17.73966177 |
| C7orf13      | NR_026865    | 52.22393965 | 4.548010612 | 0.000369506 | 11.48280954 |
| C1RL-AS1     | NR_026947    | 135.0810825 | 6.829651611 | 1.66E-11    | 19.77861979 |
| DNAJC4       | NM_005528    | 93.01930787 | 22.70002628 | 0.000254953 | 4.097762122 |
| ENPP4        | NM_014936    | 111.9588169 | 0.910878717 | 1.11E-14    | 122.9129794 |
| LOC100506100 | NR_046240    | 101.060491  | 6.651754976 | 3.11E-08    | 15.19305677 |
| NPC2         | NM_006432    | 69.63191953 | 1.60209892  | 7.07E-08    | 43.46293396 |
| BAZ1B        | NM_032408    | 120         | 2.401826545 | 6.58E-12    | 49.96197591 |
| WDR83OS      | NM_016145    | 189.8970423 | 22.74634616 | 7.69E-11    | 8.348463571 |
| ERP44        | NM_015051    | 95.87645073 | 0.028964783 | 1.32E-16    | 3310.104207 |
| KAZALD1      | NM_030929    | 236.9369417 | 34.90724562 | 4.72E-13    | 6.787614934 |
| APMAP        | NM_020531    | 220.2651227 | 1.576250756 | 3.03E-27    | 139.7398998 |
| NUFIP2       | NM_020772    | 194.8159598 | 4.165898068 | 3.34E-19    | 46.76445669 |
| RHPN2        | NM_033103    | 60          | 0.470978706 | 2.72E-07    | 127.3942946 |
| ZNF321P      | NR_037805    | 79.26383906 | 1.318755476 | 1.56E-09    | 60.10503124 |
| EHHADH-AS1   | NR_038990    | 23.38738834 | 0.300907761 | 0.004008311 | 77.72278197 |
| SOX9         | NM_000346    | 144.9781248 | 8.693987793 | 1.43E-12    | 16.67567614 |
| ZSCAN16      | NM_025231    | 76.67181894 | 7.34960287  | 4.88E-06    | 10.43210365 |
| SPEN         | NM_015001    | 57.40797988 | 1.732301624 | 2.28E-05    | 33.13971372 |
| DBF4         | NM_006716    | 92.22393965 | 1.679570862 | 8.73E-10    | 54.90922814 |
| RALB         | NM_002881    | 70.16216501 | 0.981150146 | 1.34E-07    | 71.51012034 |
| HOTTIP       | NR_037843    | 72.48906239 | 2.852625839 | 1.85E-07    | 25.41134607 |
| SNHG11       | NR_003239    | 137.9382254 | 10.24965226 | 5.38E-11    | 13.45784442 |
| RABL3        | NM_173825    | 58.73359358 | 0.679617531 | 2.41E-07    | 86.42153995 |
| DDB1         | NM_001923    | 86.50965393 | 2.477244057 | 9.74E-09    | 34.92173236 |
| ZW10         | NM_004724    | 75.87645073 | 0.592073175 | 4.15E-10    | 128.1538397 |
| PNPLA5       | NM_138814    | 60.58945276 | 0.273378952 | 9.45E-09    | 221.6317402 |
| HIP1R        | NM_003959    | 42.85714286 | 4.692558834 | 0.002651507 | 9.133000645 |

|               |              |             |             |             |             |
|---------------|--------------|-------------|-------------|-------------|-------------|
| CHAC2         | NM_001008708 | 123.6525111 | 4.265176076 | 8.13E-13    | 28.99118556 |
| LINC01267     | NR_110135    | 37.93822536 | 2.622693158 | 0.001858747 | 14.4653694  |
| UBXN4         | NM_014607    | 67.30502215 | 1.461042333 | 5.99E-07    | 46.06644218 |
| EPRS          | NM_004446    | 72.48906239 | 1.214140453 | 4.68E-07    | 59.70401714 |
| PNRC2         | NM_017761    | 128.8365513 | 9.16077457  | 1.76E-10    | 14.06393644 |
| NHEJ1         | NM_024782    | 201.060491  | 0.989427787 | 1.44E-22    | 203.2088584 |
| C1orf228      | NM_001145636 | 61.3256137  | 3.180011735 | 1.16E-05    | 19.28471302 |
| MED31         | NM_016060    | 67.03989941 | 5.494699842 | 2.65E-05    | 12.20083014 |
| TAF8          | NM_138572    | 169.6319195 | 1.41839777  | 2.45E-20    | 119.5940399 |
| ATXN7L2       | NM_153340    | 89.89704227 | 1.694862357 | 3.42E-10    | 53.04091032 |
| NAA50         | NM_025146    | 152.2239396 | 2.27971165  | 5.82E-17    | 66.77333058 |
| MYO10         | NM_012334    | 177.6731026 | 0.667822135 | 1.30E-19    | 266.048538  |
| GPR125        | NM_145290    | 60          | 0.771956669 | 7.68E-07    | 77.72456977 |
| SPC24         | NM_182513    | 93.28443061 | 5.192396607 | 1.33E-08    | 17.96558269 |
| HINT2         | NM_032593    | 136.6718189 | 17.75405928 | 3.87E-08    | 7.698060303 |
| PCNX          | NM_014982    | 62.85714286 | 0.550895866 | 4.09E-07    | 114.099863  |
| SCAI          | NM_173690    | 57.14285714 | 0.145551175 | 3.59E-07    | 392.596329  |
| MAL2          | NM_052886    | 51.69369417 | 1.899041839 | 5.55E-05    | 27.22093485 |
| ARPC4-TTLL3   | NM_001198793 | 113.0193079 | 5.902820543 | 3.72E-10    | 19.14666167 |
| ZBTB11        | NM_014415    | 132.7541851 | 4.852111868 | 1.91E-12    | 27.36008335 |
| EIF3F         | NM_003754    | 50.42728775 | 1.680552953 | 6.70E-06    | 30.00636645 |
| LRRC47        | NM_020710    | 88.57142857 | 2.968285553 | 1.22E-08    | 29.83925467 |
| RAB38         | NM_022337    | 103.3873883 | 0.567662192 | 3.87E-13    | 182.1283675 |
| RAC2          | NM_002872    | 114.550837  | 6.562664571 | 8.65E-10    | 17.45492792 |
| DNAJC25-GNG10 | NM_004125    | 241.3256137 | 4.219814667 | 2.23E-24    | 57.18867598 |
| GBAP1         | NR_002188    | 116.4066962 | 5.571089016 | 1.30E-10    | 20.89478303 |
| SEC61B        | NM_006808    | 38.46847084 | 2.20418573  | 0.000726981 | 17.45246343 |
| PISD          | NM_014338    | 129.1016741 | 9.7336701   | 7.39E-10    | 13.26341172 |
| TUBBP5        | NR_027156    | 32.75418513 | 0.06305143  | 3.57E-05    | 519.4836215 |
| DNAJC3        | NM_006260    | 175.0810825 | 0.606452285 | 3.64E-21    | 288.6972097 |
| CNOT6         | NM_015455    | 44.97812478 | 0.98979075  | 2.82E-05    | 45.44205406 |
| TMEM180       | NM_024789    | 164.9781248 | 8.0602812   | 1.64E-14    | 20.46803588 |
| FLJ27354      | NR_033981    | 73.54955335 | 3.913482403 | 2.41E-07    | 18.79388886 |
| PCNXL4        | NM_022495    | 173.2844306 | 1.190164229 | 1.29E-20    | 145.5970751 |
| FBXO42        | NM_018994    | 102.6512274 | 1.278960143 | 2.48E-10    | 80.26147491 |
| EGLN3         | NM_022073    | 183.6525111 | 2.502229261 | 7.98E-20    | 73.39555729 |
| WASL          | NM_003941    | 180.2651227 | 0.991458638 | 1.20E-20    | 181.8180969 |
| TTLL5         | NM_015072    | 129.1016741 | 0.062217231 | 2.68E-18    | 2075.014779 |
| TPPP          | NM_007030    | 48.83655131 | 2.598770414 | 0.000128161 | 18.79217612 |
| GEMIN6        | NM_024775    | 66.77477667 | 3.419748283 | 2.05E-06    | 19.52622566 |
| LOC401052     | NM_001008737 | 107.3050222 | 12.42448975 | 2.32E-07    | 8.636573762 |
| UVSSA         | NM_020894    | 95.87645073 | 1.322911296 | 1.57E-10    | 72.47383176 |
| TMEM183A      | NM_138391    | 95.34620525 | 2.358321647 | 1.45E-09    | 40.42968667 |
| LPCAT3        | NM_005768    | 163.3873883 | 3.584442232 | 7.92E-16    | 45.58237454 |
| USP12         | NM_182488    | 65.97940845 | 1.099595239 | 1.98E-07    | 60.00335952 |
| LOC100128568  | NR_046376    | 95.34620525 | 2.669488564 | 1.69E-09    | 35.7170308  |
| DNAH17-AS1    | NR_102401    | 115.611328  | 4.528032185 | 4.49E-11    | 25.53235561 |
| LRP4          | NM_002334    | 61.06049096 | 0.680712049 | 2.82E-07    | 89.70091111 |
| COG3          | NM_031431    | 120.5302455 | 0.760493839 | 1.08E-14    | 158.4894437 |
| PDZD11        | NM_016484    | 77.40797988 | 2.609516368 | 2.13E-08    | 29.66372651 |
| ITPKB         | NM_002221    | 41.06049096 | 1.0101273   | 0.00013775  | 40.6488281  |
| C17orf67      | NM_001085430 | 118.2033481 | 1.537080437 | 9.39E-13    | 76.9012117  |
| CCNG2         | NM_004354    | 75.87645073 | 4.344359032 | 3.76E-07    | 17.46551106 |
| LOC646762     | NR_024278    | 109.6319195 | 0.862381176 | 1.16E-12    | 127.1269859 |
| COMMD1        | NM_152516    | 94.81595977 | 0.011794427 | 4.34E-16    | 8039.047354 |
| PAM16         | NM_016069    | 78.73359358 | 4.815130742 | 9.25E-07    | 16.35128884 |
| ANO8          | NM_020959    | 57.67310262 | 11.84127886 | 0.004153982 | 4.870513001 |
| CRADD         | NM_003805    | 80.53024548 | 0.776151666 | 5.68E-09    | 103.7558109 |
| SYNJ2BP       | NM_018373    | 83.38738834 | 1.273217688 | 1.32E-08    | 65.49342591 |
| LARP1         | NM_015315    | 75.34620525 | 2.805216227 | 5.44E-07    | 26.85932175 |
| ENDOD1        | NM_015036    | 142.6512274 | 1.813768969 | 1.28E-15    | 78.64906162 |
| MSANTD4       | NM_032424    | 115.3462052 | 3.035892857 | 5.82E-12    | 37.99416207 |



**Sheet2: Pausing genes in HMBA treated HCT116 cells expressing shGFP**

| Symbol      | Gene ID      | Promoter RPK | Gene Body RPK | pValue      | Pause Ratio(TR) |
|-------------|--------------|--------------|---------------|-------------|-----------------|
| ATP5G3      | NM_001689    | 67.58707355  | 0.389407526   | 9.44E-09    | 173.5638603     |
| CPSF3L      | NM_001256460 | 39.05669588  | 2.813043277   | 0.001283916 | 13.88414327     |
| NPM1        | NM_002520    | 31.51110656  | 0.448189952   | 0.000606125 | 70.30748101     |
| CD320       | NM_016579    | 69.07743799  | 1.074244077   | 1.18E-07    | 64.30329893     |
| PLSCR3      | NM_020360    | 55.4766238   | 3.689446985   | 0.000327741 | 15.0365689      |
| MMP24-AS1   | NR_102706    | 72.94399974  | 4.144419932   | 7.30E-06    | 17.60053299     |
| SERTAD1     | NM_013376    | 64.8617269   | 3.011151416   | 5.22E-06    | 21.54050658     |
| ANAPC11     | NM_016476    | 38.8691617   | 0.127865724   | 1.83E-05    | 303.9842156     |
| NUDT1       | NM_198949    | 58.90026912  | 1.255368213   | 1.10E-06    | 46.91871954     |
| ZNF324      | NM_014347    | 36.77426566  | 1.514903443   | 0.000702013 | 24.27498982     |
| CIRBP       | NR_023313    | 89.36392766  | 20.71070229   | 0.000880877 | 4.314867088     |
| SLC35A2     | NM_001282647 | 34.2364532   | 1.206247767   | 0.001758366 | 28.38260441     |
| TMC4        | NM_001145303 | 34.49183545  | 1.238634892   | 0.002762003 | 27.84665254     |
| PSMC3IP     | NM_001256016 | 43.17863987  | 0.395498708   | 1.41E-05    | 109.1751729     |
| UBA52       | NM_001033930 | 85.49736591  | 5.124971914   | 2.31E-07    | 16.68250428     |
| TK1         | NM_003258    | 43.6215563   | 1.591853233   | 0.000369804 | 27.40300135     |
| DDTL        | NM_001084393 | 67.58707355  | 11.17866471   | 0.000589174 | 6.04607753      |
| TM7SF2      | NR_102367    | 120.9688013  | 11.99748831   | 6.73E-08    | 10.08284386     |
| SLX1A       | NM_001015000 | 170.176747   | 22.01985185   | 2.52E-09    | 7.728332969     |
| LRRC75A-AS1 | NR_027162    | 68.37913931  | 14.67085255   | 0.002360905 | 4.660883824     |
| HNRNPA1P10  | NR_002944    | 74.78351352  | 4.755894078   | 7.58E-06    | 15.72438585     |
| HCP5        | NR_040662    | 45.20568784  | 1.001499013   | 0.000137069 | 45.13802535     |
| CYB561A3    | NM_001161454 | 33.35062034  | 1.272134347   | 0.002900842 | 26.21627221     |
| NR4A1       | NM_002135    | 88.5718619   | 1.912468941   | 2.89E-09    | 46.31283678     |
| HES6        | NM_018645    | 93.13672232  | 13.6690243    | 5.74E-05    | 6.813706689     |
| HARS        | NM_001289093 | 42.82949054  | 0.29178903    | 6.10E-06    | 146.7823878     |
| NUDT22      | NM_001128613 | 64.8617269   | 4.927435546   | 6.01E-05    | 13.16338414     |
| ABHD11      | NM_148912    | 57.31613758  | 5.294208554   | 0.000328143 | 10.82619564     |
| C21orf33    | NM_198155    | 34.93475188  | 1.943895633   | 0.003603263 | 17.97151621     |
| PPIA        | NM_021130    | 61.18269933  | 4.609075725   | 0.000159813 | 13.27439664     |
| LINC01024   | NR_102741    | 73.38691617  | 0.286758932   | 4.89E-10    | 255.9185013     |
| DNAJC19     | NR_046073    | 46.25313586  | 1.273630772   | 3.82E-05    | 36.31596916     |
| RASSF1      | NM_007182    | 42.57410829  | 4.11171402    | 0.003128863 | 10.35434568     |
| BAIAP3      | NM_001199099 | 62.13638026  | 2.20591305    | 4.44E-06    | 28.1681004      |
| C8orf58     | NM_001013842 | 37.66009852  | 0.380880373   | 0.000104768 | 98.87644846     |
| AURKAIP1    | NM_001127229 | 49.58301409  | 2.012531269   | 0.0002026   | 24.63713973     |
| RPL13A      | NM_012423    | 83.91323438  | 17.37115735   | 0.000782131 | 4.830607006     |
| FOS         | NM_005252    | 125.6952769  | 15.60745124   | 1.90E-07    | 8.05354282      |
| RPS10       | NM_001203245 | 38.17086302  | 0.373969134   | 0.000169112 | 102.0695549     |
| MSTO1       | NM_001256533 | 29.04114216  | 0.229200646   | 0.001164973 | 126.7061971     |
| SRA1        | NR_045587    | 77.85800951  | 1.420728991   | 2.95E-08    | 54.80145051     |
| SPDYC       | NM_001008778 | 46.69605229  | 1.057217083   | 5.44E-05    | 44.16884008     |
| ZNF276      | NR_110129    | 57.66528692  | 4.137630863   | 0.00020574  | 13.93678867     |
| COX5B       | NM_001862    | 65.04926108  | 0.576214748   | 2.99E-07    | 112.8906563     |
| FLVCR1-AS1  | NR_027286    | 42.4803412   | 0.838074112   | 0.000622471 | 50.68804848     |
| MAGEF1      | NM_022149    | 59.15565137  | 1.480535904   | 1.93E-05    | 39.9555669      |
| SNAPC2      | NM_003083    | 47.83726739  | 5.410874362   | 0.00294632  | 8.840949575     |
| EIF1        | NM_005801    | 111.1148628  | 16.86282301   | 7.43E-06    | 6.589339323     |
| PRMT1       | NM_198318    | 30.27612436  | 0.27334336    | 0.000152807 | 110.7622456     |
| UNC45A      | NM_001039675 | 42.4803412   | 0.602900909   | 3.08E-05    | 70.45990566     |
| TMEM177     | NM_001105199 | 59.24941846  | 0.792601052   | 1.19E-06    | 74.75314132     |
| MRPL49      | NR_037568    | 51.95921139  | 4.895168727   | 0.000944841 | 10.6143862      |
| CARHSP1     | NM_001278260 | 78.99922461  | 1.914231356   | 3.53E-08    | 41.26942355     |
| BAMBI       | NM_012342    | 80.93250549  | 0.542867197   | 4.73E-10    | 149.0834332     |
| TYSND1      | NM_001040273 | 32.90770391  | 0.91359419    | 0.001393417 | 36.0200451      |
| STK16       | NR_026909    | 48.18641673  | 4.858203209   | 0.001623155 | 9.918567556     |
| C9orf16     | NM_024112    | 48.53556607  | 1.46812828    | 4.90E-05    | 33.05948582     |
| EEF1D       | NM_001130057 | 39.91660971  | 0.172907414   | 7.43E-06    | 230.8553971     |
| CATIP-AS1   | NR_110573    | 40.19791098  | 2.252141993   | 0.002824498 | 17.84874627     |
| MEPCE       | NM_001194991 | 107.5296023  | 6.431374526   | 1.96E-08    | 16.71953668     |

|              |              |             |             |             |             |
|--------------|--------------|-------------|-------------|-------------|-------------|
| RPL17        | NM_001199345 | 59.5985678  | 1.632069342 | 1.82E-06    | 36.51717868 |
| POLR3H       | NM_001282885 | 24.73166399 | 0.089519626 | 0.000783015 | 276.2708597 |
| ALG3         | NM_001006941 | 49.67678118 | 3.421109938 | 0.000506768 | 14.52066203 |
| PSMD8        | NM_002812    | 33.35062034 | 0.486806167 | 0.000622471 | 68.50903418 |
| ZNF771       | NM_016643    | 38.3583972  | 0.395456445 | 0.000248034 | 96.99777982 |
| KHNYN        | NM_001290257 | 53.44957584 | 1.445704199 | 1.25E-05    | 36.97130844 |
| ZBTB48       | NM_005341    | 50.81799628 | 4.598551863 | 0.000445886 | 11.05086945 |
| STMN3        | NM_015894    | 21.58931994 | 0.103942127 | 0.001340871 | 207.7051977 |
| APOA1BP      | NM_144772    | 62.92844603 | 4.573172147 | 4.61E-05    | 13.76034927 |
| ARFIP2       | NM_001242856 | 42.92325763 | 1.636637525 | 0.000173197 | 26.22648996 |
| SIGMAR1      | NM_001282207 | 82.32910284 | 3.321892791 | 1.11E-07    | 24.78379286 |
| DCXR         | NM_016286    | 104.0121899 | 12.97882456 | 1.83E-05    | 8.013991513 |
| LINC00115    | NR_024321    | 67.93622288 | 7.372662416 | 0.000392081 | 9.214611907 |
| RPL8         | NM_033301    | 74.15306291 | 6.587627928 | 1.77E-05    | 11.25641334 |
| FGF18        | NM_003862    | 26.94624613 | 0.033657789 | 0.000453324 | 800.5946589 |
| NOP14        | NM_001291979 | 29.57782568 | 0.312939309 | 0.001164973 | 94.51617255 |
| C2orf68      | NM_001013649 | 45.90398652 | 0.501795267 | 9.38E-06    | 91.4795128  |
| ILK          | NM_004517    | 35.63305056 | 1.286877141 | 0.001571561 | 27.68955126 |
| ACAP3        | NM_030649    | 24.66381592 | 0.554095378 | 0.00273407  | 44.51186001 |
| DDIT3        | NM_001195055 | 100.6823116 | 10.04861815 | 8.96E-07    | 10.01951812 |
| RPL7A        | NM_000972    | 63.37136246 | 5.742297703 | 0.000122452 | 11.03588942 |
| GCAT         | NM_014291    | 50.11969761 | 4.800530019 | 0.000454785 | 10.44045083 |
| RBM14        | NM_001198836 | 95.67453478 | 0.690218728 | 7.76E-12    | 138.6148055 |
| CHPF2        | NM_019015    | 37.21718209 | 0.61595979  | 0.000248034 | 60.42144747 |
| PSMG3        | NM_001134340 | 78.65007527 | 3.578554535 | 1.06E-06    | 21.9781687  |
| SLC25A3      | NM_002635    | 72.94399974 | 0.993617286 | 4.55E-09    | 73.41257118 |
| PPP1CA       | NM_001008709 | 53.98625936 | 5.96754044  | 0.001226448 | 9.046651614 |
| HNRNPH1      | NM_001257293 | 108.5770503 | 2.085665217 | 1.59E-11    | 52.05871462 |
| OSGEPL1-AS1  | NR_102429    | 35.9821999  | 0.875130191 | 0.000541407 | 41.11639648 |
| MFSD5        | NM_032889    | 43.27240697 | 1.946149083 | 0.000821993 | 22.23488804 |
| UNC119       | NM_005148    | 69.52035442 | 2.790828797 | 1.33E-06    | 24.91028991 |
| BTG2         | NM_006763    | 100.2393952 | 3.237948612 | 1.54E-09    | 30.95768562 |
| LBX2         | NM_001009812 | 45.55483718 | 3.040813261 | 0.000687497 | 14.98113606 |
| ATG4D        | NM_032885    | 60.39063357 | 0.676511292 | 2.71E-07    | 89.26773921 |
| SURF4        | NM_033161    | 43.97070564 | 0.199242867 | 2.60E-06    | 220.688983  |
| SEPW1        | NM_003009    | 70.12488601 | 3.32645258  | 4.46E-06    | 21.08098171 |
| CST3         | NM_000099    | 60.83355    | 0.351799621 | 8.47E-08    | 172.9210221 |
| ARF5         | NM_001662    | 46.6022852  | 0.209748337 | 1.41E-05    | 222.1819052 |
| ST6GALNAC2   | NM_006456    | 25.26834751 | 0.088734153 | 0.000783015 | 284.7646217 |
| RPL22L1      | NM_001099645 | 68.28537222 | 3.173128432 | 6.65E-06    | 21.51988918 |
| ARRDC1       | NM_152285    | 61.53184867 | 6.617354719 | 0.000201616 | 9.298556793 |
| BSG          | NM_198589    | 44.66900432 | 0.232729107 | 5.27E-06    | 191.935615  |
| HYAL3        | NM_001200031 | 42.13119186 | 2.378839248 | 0.001235362 | 17.71081921 |
| FUT4         | NM_002033    | 32.11563815 | 1.629037938 | 0.003490154 | 19.71448141 |
| LOC100289230 | NR_036530    | 79.0929917  | 5.278236453 | 9.16E-06    | 14.98473826 |
| DOLK         | NM_014908    | 57.31613758 | 4.380961238 | 0.000142599 | 13.08300495 |
| DUSP2        | NM_004418    | 42.92325763 | 1.909956115 | 0.000821993 | 22.47342612 |
| NUBP2        | NM_012225    | 45.11192075 | 2.561632604 | 0.000592344 | 17.61061312 |
| ZFP36        | NM_003407    | 87.08149745 | 20.58509118 | 0.001310207 | 4.230318763 |
| CDK10        | NR_027702    | 58.96811719 | 13.67029046 | 0.004313116 | 4.313596507 |
| KLC2         | NM_022822    | 37.21718209 | 1.587801769 | 0.001323324 | 23.43943862 |
| ACP2         | NM_001131064 | 82.67825218 | 1.342988491 | 1.96E-09    | 61.56288956 |
| PLCB3        | NM_000932    | 75.66934638 | 0.583550093 | 9.01E-09    | 129.6706954 |
| FUS          | NM_001170634 | 124.2986795 | 1.141588636 | 1.35E-15    | 108.8821976 |
| TNK1         | NM_001251902 | 51.16714562 | 6.004249523 | 0.001838411 | 8.521821991 |
| NXF1         | NM_006362    | 97.42028148 | 2.553121381 | 3.09E-09    | 38.15732468 |
| NIP7         | NM_016101    | 36.77426566 | 2.235908506 | 0.002334867 | 16.44712454 |
| MAT2A        | NM_005911    | 88.63970996 | 5.651527208 | 8.96E-07    | 15.68420477 |
| CDKN1C       | NM_001122631 | 41.68827543 | 2.643710508 | 0.001393417 | 15.76885037 |
| PPIB         | NM_000942    | 65.74755976 | 1.765882516 | 1.53E-06    | 37.23212568 |
| ZC3H12A      | NM_025079    | 34.93475188 | 2.102856523 | 0.003273375 | 16.61299832 |
| PAF1         | NR_046384    | 47.48811805 | 1.589044552 | 0.000104791 | 29.88469894 |

|              |              |             |             |             |             |
|--------------|--------------|-------------|-------------|-------------|-------------|
| LOC100288152 | NR_125375    | 30.71904079 | 1.687024621 | 0.004516165 | 18.20900561 |
| SNAI1        | NM_005985    | 93.92878809 | 2.631910855 | 3.17E-09    | 35.68843827 |
| FBXO41       | NM_001080410 | 50.2134647  | 0.68524007  | 1.23E-05    | 73.27864627 |
| IQCC         | NM_001160042 | 39.49961231 | 2.179136198 | 0.000855458 | 18.12627055 |
| CDAN1        | NM_138477    | 52.84504425 | 1.149629086 | 2.42E-05    | 45.96703832 |
| SNHG1        | NR_003098    | 89.87469216 | 5.247700729 | 1.92E-07    | 17.12648964 |
| CBX8         | NM_020649    | 26.75871195 | 0.216166898 | 0.003128863 | 123.7872784 |
| LOC100131691 | NR_027334    | 44.22608789 | 2.296342467 | 0.000634338 | 19.25936071 |
| AURKB        | NM_001284526 | 64.51257756 | 1.507052106 | 6.04E-07    | 42.80713143 |
| RPLP1        | NM_001003    | 81.9799535  | 13.92906613 | 0.000275998 | 5.885531216 |
| HNRNPAB      | NM_004499    | 96.81574989 | 7.470545796 | 2.45E-07    | 12.95966219 |
| SNHG7        | NR_024543    | 108.227901  | 17.11992979 | 9.55E-06    | 6.321749111 |
| PRDX1        | NM_181696    | 85.05444949 | 0.811775531 | 1.76E-10    | 104.7758232 |
| MARS2        | NM_138395    | 42.13119186 | 3.788497267 | 0.002975096 | 11.12081886 |
| MAP3K14-AS1  | NR_110326    | 47.39435096 | 0.619831888 | 4.51E-05    | 76.4632344  |
| ZNF646       | NM_014699    | 66.0967091  | 1.775776097 | 4.67E-07    | 37.22130803 |
| RCC1         | NM_001048199 | 58.01443626 | 10.83239785 | 0.00362953  | 5.355641205 |
| MBD3         | NM_001281453 | 27.38916256 | 0.692862956 | 0.001517149 | 39.53041844 |
| RPP25L       | NM_148179    | 53.1004265  | 4.664076587 | 0.000608965 | 11.38498168 |
| JMJD4        | NM_023007    | 80.8387384  | 3.526381391 | 1.92E-07    | 22.92399189 |
| SWI5         | NM_001040011 | 47.7435003  | 1.055271227 | 4.51E-05    | 45.24287131 |
| TP11         | NM_001159287 | 72.5948504  | 13.07519887 | 0.00143678  | 5.552102963 |
| CCND3        | NM_001760    | 29.22867635 | 0.116125087 | 0.001164973 | 251.6999309 |
| RPS20        | NM_001146227 | 107.8787516 | 6.277572414 | 7.54E-09    | 17.18478809 |
| RBMX         | NM_001164803 | 61.53184867 | 1.240489432 | 8.03E-07    | 49.60288019 |
| ARPC1B       | NM_005720    | 40.19791098 | 1.274151072 | 0.000969685 | 31.54877931 |
| TBCC         | NM_003192    | 59.24941846 | 5.475681163 | 0.0004965   | 10.82046538 |
| EIF5         | NM_001969    | 61.53184867 | 1.700741745 | 1.34E-06    | 36.17941927 |
| ASB6         | NM_001202403 | 55.03370737 | 8.668968594 | 0.003411781 | 6.34835699  |
| CEBPA        | NM_004364    | 117.1022396 | 6.954194298 | 2.52E-09    | 16.83908078 |
| PYGO2        | NM_138300    | 93.04295523 | 0.853443782 | 3.86E-11    | 109.0206024 |
| ISCA2        | NM_001272007 | 34.14268611 | 1.420956611 | 0.004950598 | 24.02795824 |
| FUT11        | NM_173540    | 66.44585844 | 5.649138068 | 8.14E-05    | 11.76212329 |
| HGH1         | NM_016458    | 129.910988  | 5.315420921 | 7.79E-11    | 24.44039521 |
| TSC22D1      | NM_006022    | 49.23386475 | 1.72540982  | 0.000104791 | 28.53459172 |
| TUBB3        | NM_006086    | 131.8442689 | 7.504877554 | 4.89E-10    | 17.56781079 |
| BAX          | NM_001291431 | 40.19791098 | 1.404066118 | 0.000305312 | 28.62964248 |
| SOCS2        | NM_001270467 | 27.64454481 | 0.759630236 | 0.004592544 | 36.39210697 |
| LOC102288414 | NR_104414    | 65.74755976 | 1.513701278 | 1.59E-06    | 43.4349635  |
| EIF3J-AS1    | NR_034170    | 42.13119186 | 2.977820736 | 0.001393417 | 14.14833047 |
| PGAM5        | NM_001170543 | 47.83726739 | 0.176471105 | 1.82E-06    | 271.0770551 |
| PDCD2        | NM_001199461 | 59.94771714 | 1.188824386 | 2.33E-06    | 50.42604933 |
| CSTB         | NM_000100    | 64.60634465 | 3.933062155 | 1.65E-05    | 16.42647436 |
| SRXN1        | NM_080725    | 47.83726739 | 2.731875036 | 0.00035399  | 17.5107817  |
| WDR55        | NM_017706    | 83.12116861 | 0.69770722  | 3.56E-10    | 119.1347405 |
| CHCHD7       | NM_024300    | 81.53703707 | 1.108911875 | 1.54E-09    | 73.52887001 |
| SNHG12       | NR_024127    | 90.66675793 | 15.86146636 | 8.75E-05    | 5.716164941 |
| KAT5         | NM_182710    | 51.61006205 | 5.569260365 | 0.001561266 | 9.266950847 |
| GAMT         | NM_000156    | 51.95921139 | 2.190491062 | 5.66E-05    | 23.7203485  |
| ATP5SL       | NM_001167869 | 26.31579552 | 0.308699879 | 0.001146127 | 85.24718433 |
| RPL31        | NM_000993    | 66.35209135 | 3.230927107 | 9.16E-06    | 20.53654854 |
| RPS23        | NM_001025    | 37.47256434 | 2.706558683 | 0.00441315  | 13.84509583 |
| LSM5         | NM_001139499 | 34.49183545 | 0.288245771 | 0.000442812 | 119.6612021 |
| ELOVL1       | NM_001256401 | 59.24941846 | 6.587951718 | 0.000536357 | 8.993602412 |
| PABPC4       | NM_001135654 | 78.65007527 | 0.468880082 | 5.23E-10    | 167.740278  |
| SMTN         | NM_006932    | 91.4588237  | 3.19140122  | 9.45E-08    | 28.65788956 |
| LOC101928069 | NR_120586    | 57.66528692 | 3.971936451 | 6.81E-05    | 14.51817964 |
| INO80B       | NM_031288    | 40.98997675 | 1.912442735 | 0.000667791 | 21.43330935 |
| GRINA        | NM_000837    | 64.25719532 | 2.278550641 | 5.46E-06    | 28.20090727 |
| POLG         | NM_002693    | 88.47809481 | 1.02357176  | 8.60E-10    | 86.44053914 |
| FBXW5        | NM_018998    | 38.3583972  | 2.604071899 | 0.003400444 | 14.73016056 |
| COMMD5       | NM_014066    | 49.23386475 | 2.690637366 | 0.000348275 | 18.29821639 |

|          |              |             |             |             |             |
|----------|--------------|-------------|-------------|-------------|-------------|
| TIMM8B   | NM_012459    | 42.4803412  | 3.515550023 | 0.004310868 | 12.08355475 |
| MIDN     | NM_177401    | 123.6003809 | 17.6450415  | 5.21E-07    | 7.004822339 |
| MSRB1    | NM_016332    | 36.68049857 | 0.384362579 | 0.000104768 | 95.43202315 |
| LENG1    | NM_024316    | 49.32763184 | 3.998819682 | 0.001061695 | 12.33554793 |
| C7orf49  | NM_001243751 | 60.20309939 | 5.675683455 | 0.000145942 | 10.60719821 |
| TRAF4    | NM_004295    | 80.58335615 | 1.651755977 | 1.55E-08    | 48.78647772 |
| SNX22    | NR_073534    | 50.91176337 | 6.03073203  | 0.001313256 | 8.442053655 |
| SNAPIN   | NR_052020    | 42.13119186 | 5.917209242 | 0.004678458 | 7.120111887 |
| RPS16    | NM_001020    | 56.08115539 | 6.800976285 | 0.00143678  | 8.246044838 |
| WWC2-AS2 | NR_024008    | 33.001471   | 1.774376855 | 0.002070835 | 18.59890751 |
| SRSF2    | NM_003016    | 74.94512868 | 10.00573272 | 0.0002026   | 7.490218937 |
| IPO4     | NM_024658    | 46.69605229 | 0.927935494 | 4.74E-05    | 50.32251982 |
| SH3GL1   | NM_003025    | 32.20940524 | 0.824691895 | 0.001517149 | 39.05628932 |
| RPL14    | NM_003973    | 65.30464333 | 1.593813973 | 6.04E-07    | 40.9738178  |
| MRPS16   | NM_016065    | 58.10820335 | 0.892447134 | 1.19E-06    | 65.11108743 |
| PDE12    | NM_177966    | 42.38657411 | 0.363342133 | 1.41E-05    | 116.6574702 |
| ESPN     | NM_031475    | 103.7568076 | 3.588101563 | 1.61E-08    | 28.91690935 |
| PHLDA2   | NM_003311    | 85.84651525 | 9.959179081 | 0.000112579 | 8.619838498 |
| ANGPTL4  | NR_104213    | 95.76830188 | 0.723501612 | 9.89E-13    | 132.3677795 |
| GRHRP    | NM_012203    | 56.96698825 | 1.582274169 | 9.69E-06    | 36.00323468 |
| SLC3A2   | NM_001012664 | 48.18641673 | 0.137795438 | 5.67E-07    | 349.6952968 |
| RCE1     | NM_005133    | 52.05297848 | 5.30928311  | 0.001620287 | 9.804144439 |
| RPL19    | NM_000981    | 71.70901754 | 2.85334694  | 1.48E-06    | 25.13154518 |
| METTTL23 | NM_001206983 | 56.08115539 | 5.085258533 | 0.000374189 | 11.02818176 |
| IER5L    | NM_203434    | 84.61153306 | 14.54247676 | 0.000159813 | 5.818234021 |
| RBM8A    | NM_005105    | 49.67678118 | 0.491812057 | 3.48E-06    | 101.0076521 |
| DDIT4    | NM_019058    | 109.9736477 | 10.782932   | 6.64E-07    | 10.19886314 |
| ERF      | NM_006494    | 54.33540869 | 7.966773912 | 0.003255631 | 6.820252375 |
| RDH13    | NR_027382    | 60.73978291 | 3.241169212 | 1.79E-05    | 18.74008388 |
| RPS15    | NM_001018    | 76.01849572 | 7.245639668 | 1.93E-05    | 10.49161968 |
| TMEM120A | NM_031925    | 35.63305056 | 2.352642796 | 0.00302865  | 15.14596717 |
| MIR22HG  | NR_028505    | 48.9784825  | 2.47498604  | 0.000173569 | 19.78939748 |
| CHRAC1   | NM_017444    | 59.85395005 | 6.286558285 | 0.000202999 | 9.520940924 |
| PRR13    | NM_018457    | 40.19791098 | 0.730137841 | 6.53E-05    | 55.05523575 |
| P4HB     | NM_000918    | 50.37507985 | 0.247639396 | 2.00E-07    | 203.4211062 |
| SRSF7    | NM_001031684 | 83.56408504 | 1.250685776 | 3.17E-09    | 66.81461216 |
| DUSP1    | NM_004417    | 88.12894547 | 4.147535162 | 2.02E-07    | 21.24851075 |
| SNF8     | NM_007241    | 63.7205118  | 0.787124675 | 4.63E-07    | 80.95351828 |
| SLC50A1  | NM_001122837 | 80.04667263 | 4.312604893 | 2.22E-06    | 18.56109581 |
| CILP2    | NM_153221    | 31.51110656 | 0.101894336 | 5.25E-05    | 309.252779  |
| COX7A2   | NR_029466    | 46.34690295 | 1.501580534 | 5.66E-05    | 30.86541273 |
| QARS     | NM_005051    | 21.2401706  | 0.063188142 | 0.003848688 | 336.1417163 |
| SRSF5    | NM_001039465 | 88.38432772 | 4.393508006 | 2.21E-07    | 20.11702894 |
| RPL12    | NM_000976    | 94.88246902 | 12.70483327 | 1.54E-05    | 7.468218353 |
| RPL27A   | NM_000990    | 82.42286993 | 11.24684527 | 4.73E-05    | 7.328532397 |
| FTH1     | NM_002032    | 50.85992533 | 1.666154023 | 1.93E-05    | 30.52534437 |
| MRPL20   | NM_017971    | 42.38657411 | 4.086886043 | 0.001731657 | 10.37136188 |
| PTMS     | NM_002824    | 41.08374384 | 0.811119282 | 6.53E-05    | 50.65068083 |
| EMC9     | NM_016049    | 92.69380589 | 8.350699533 | 4.34E-06    | 11.10012467 |
| SLC2A6   | NM_001145099 | 35.9821999  | 2.030733136 | 0.001323324 | 17.71882246 |
| DHPS     | NM_001930    | 49.32763184 | 1.45572183  | 2.34E-05    | 33.88534185 |
| NUDT18   | NM_024815    | 59.24941846 | 3.539924755 | 6.45E-05    | 16.73747963 |
| ACTB     | NM_001101    | 80.04667263 | 17.10549344 | 0.000902371 | 4.679588632 |
| CYBA     | NM_000101    | 64.16342823 | 2.686327416 | 1.02E-05    | 23.88518534 |
| RPL3     | NM_001033853 | 88.82724414 | 8.660795435 | 2.41E-06    | 10.25624549 |
| RPL4     | NM_000968    | 59.41103362 | 0.419116924 | 2.92E-08    | 141.752886  |
| MOGS     | NM_001146158 | 45.11192075 | 4.538327632 | 0.002585238 | 9.940208026 |
| STK4-AS1 | NR_038341    | 30.27612436 | 0.735302494 | 0.00339551  | 41.17506007 |
| BAIAP2   | NM_006340    | 94.62708677 | 0.865475846 | 5.20E-10    | 109.3353295 |
| NDNL2    | NM_138704    | 56.96698825 | 4.984620855 | 0.001050482 | 11.42854991 |
| PIGY     | NM_001042616 | 76.62302731 | 0.661490932 | 1.55E-08    | 115.8338288 |
| EEF2     | NM_001961    | 68.79613672 | 5.173856518 | 4.44E-05    | 13.29687758 |

|                |              |             |             |             |             |
|----------------|--------------|-------------|-------------|-------------|-------------|
| FAM214B        | NM_025182    | 21.68308703 | 0.353686888 | 0.003724389 | 61.3058831  |
| C22orf29       | NM_024627    | 91.55259079 | 1.867720254 | 1.54E-09    | 49.01836373 |
| SF3B4          | NM_005850    | 54.68455803 | 0.832688413 | 5.34E-06    | 65.67229368 |
| ZC3H10         | NM_032786    | 60.39063357 | 0.791868588 | 4.58E-07    | 76.26345393 |
| ATP6V0C        | NM_001694    | 55.12747446 | 1.488542771 | 2.41E-05    | 37.034525   |
| RPL36A-HNRNPH2 | NM_001199974 | 28.08746124 | 0.497907616 | 0.001517149 | 56.41098937 |
| CDC20          | NM_001255    | 58.10820335 | 5.876872814 | 0.000761653 | 9.887606077 |
| ZNF296         | NM_145288    | 72.50108331 | 3.037969912 | 2.17E-06    | 23.8649774  |
| ZNF575         | NM_174945    | 34.93475188 | 0.757462157 | 0.001368939 | 46.12078839 |
| C12orf57       | NM_138425    | 102.5218254 | 17.05783619 | 4.38E-05    | 6.010247976 |
| INTS5          | NM_030628    | 79.16083977 | 2.785928539 | 5.89E-08    | 28.41452631 |
| C19orf52       | NM_138358    | 43.6215563  | 3.008184503 | 0.002679417 | 14.50095772 |
| MYC            | NM_002467    | 65.65379267 | 2.151974082 | 1.28E-06    | 30.5086354  |
| BTG1           | NM_001731    | 70.66156953 | 0.120391366 | 1.25E-09    | 586.9322035 |
| GAS6-AS1       | NR_044995    | 38.70754654 | 2.742913412 | 0.001840042 | 14.11183684 |
| C11orf31       | NM_170746    | 76.36764506 | 6.578096896 | 1.65E-05    | 11.60938282 |
| TRIM47         | NM_033452    | 55.82577314 | 1.493423439 | 4.67E-06    | 37.38107469 |
| MCL1           | NM_182763    | 57.66528692 | 2.661019494 | 2.11E-05    | 21.67037373 |
| SLC52A2        | NM_001253816 | 73.64229842 | 1.440549424 | 1.90E-07    | 51.1209801  |
| RPL36AL        | NM_001001    | 51.95921139 | 5.69623985  | 0.002690547 | 9.121668462 |
| TUBA4A         | NM_006000    | 75.4818122  | 8.049131339 | 7.88E-05    | 9.377634557 |
| RABGGTB        | NR_073562    | 50.81799628 | 0.929576676 | 8.05E-06    | 54.66789089 |
| TMEM256-PLSCR3 | NR_037719    | 63.37136246 | 5.536810926 | 6.34E-05    | 11.44546261 |
| TMEM249        | NM_001252404 | 61.53184867 | 3.943766708 | 0.000173197 | 15.6023044  |
| COQ10A         | NM_144576    | 46.6022852  | 2.685548469 | 0.000338944 | 17.35298608 |
| BETIL          | NM_016526    | 48.9784825  | 4.733049255 | 0.001473975 | 10.34818779 |
| SLC10A3        | NM_001142391 | 65.39841042 | 2.433625221 | 3.06E-06    | 26.87283558 |
| ZNF687         | NM_020832    | 40.98997675 | 0.586078809 | 0.000134586 | 69.93935988 |
| BUD31          | NM_003910    | 48.09264964 | 1.786678842 | 7.20E-05    | 26.91734435 |
| SRRT           | NM_015908    | 38.3583972  | 0.523149755 | 0.000513668 | 73.32202073 |
| REEP4          | NM_025232    | 45.11192075 | 4.8878838   | 0.002585238 | 9.22933576  |
| NPM3           | NM_006993    | 66.00294201 | 8.770495056 | 0.000497051 | 7.525566298 |
| COPS6          | NM_006833    | 55.03370737 | 2.69767686  | 8.75E-05    | 20.40040755 |
| RRP7A          | NM_015703    | 55.73200605 | 3.084542919 | 0.000101294 | 18.0681571  |
| SQSTM1         | NM_003900    | 84.8669153  | 2.69464073  | 1.58E-07    | 31.49470516 |
| NT5C           | NM_001252377 | 75.4818122  | 15.08210274 | 0.003152595 | 5.004727359 |
| EIF4A2         | NM_001967    | 77.06594374 | 3.654119572 | 1.34E-06    | 21.09015379 |
| GAPDH          | NM_001289745 | 92.69380589 | 19.0914586  | 0.000347855 | 4.855250081 |
| NDOR1          | NM_001144026 | 46.25313586 | 0.462756788 | 2.88E-05    | 99.9512855  |
| EFNA3          | NM_004952    | 58.10820335 | 5.067867693 | 0.00012427  | 11.46600639 |
| C5orf45        | NM_001017987 | 52.56374298 | 1.061662509 | 4.82E-05    | 49.51078382 |
| BANF1          | NM_003860    | 57.31613758 | 10.75226357 | 0.004179544 | 5.330611291 |
| ZFAS1          | NR_036659    | 70.91695178 | 7.992436246 | 0.00014846  | 8.873008128 |
| LINC00659      | NR_046224    | 56.96698825 | 5.706819211 | 0.000365772 | 9.982266153 |
| FASTK          | NM_001258461 | 51.95921139 | 4.50262389  | 0.000660938 | 11.53976274 |
| WDR24          | NM_032259    | 72.85023265 | 2.55270582  | 4.34E-07    | 28.53843638 |
| RHOB           | NM_004040    | 77.76424242 | 5.270349328 | 1.36E-05    | 14.75504517 |
| NSMF           | NM_001130971 | 32.20940524 | 0.670522822 | 0.003135168 | 48.03625495 |
| ESRRA          | NM_001282450 | 27.64454481 | 0.174699656 | 0.000277058 | 158.2404077 |
| TMEM52         | NM_178545    | 50.02593052 | 2.47150991  | 0.000145942 | 20.24103982 |
| TNFRSF12A      | NM_016639    | 120.5258849 | 27.4331757  | 0.000119489 | 4.393435386 |
| RPP38          | NM_006414    | 62.23014735 | 3.677368146 | 1.53E-05    | 16.9224687  |
| ILF3-AS1       | NR_024333    | 42.57410829 | 0.923718031 | 0.000342113 | 46.08993963 |
| RECQL4         | NM_004260    | 50.72422919 | 7.419081431 | 0.001709034 | 6.836995882 |
| PMAIP1         | NM_021127    | 81.72457126 | 1.83290074  | 9.44E-09    | 44.58755975 |
| PNRC1          | NM_006813    | 64.95549399 | 3.835416395 | 1.41E-05    | 16.93570849 |
| UBA1           | NM_003334    | 39.94252874 | 0.15928328  | 7.43E-06    | 250.7641016 |
| LGALS1         | NM_002305    | 64.06966113 | 6.939232321 | 0.000254731 | 9.232960964 |
| ECI1           | NM_001178029 | 35.19013413 | 0.538957252 | 0.001017099 | 65.2929968  |
| SIRT7          | NM_016538    | 70.56780244 | 0.973840168 | 4.50E-08    | 72.46343368 |
| KRTCAP3        | NM_173853    | 37.56633143 | 1.213355684 | 0.002070835 | 30.96069185 |
| NCPB2-AS2      | NR_024388    | 58.45735269 | 2.863021722 | 0.000275998 | 20.41806118 |

|            |              |             |             |             |             |
|------------|--------------|-------------|-------------|-------------|-------------|
| ZFP36L2    | NM_006887    | 40.98997675 | 0.377057052 | 1.83E-05    | 108.7102775 |
| SREBF1     | NM_004176    | 63.37136246 | 0.183212054 | 5.07E-09    | 345.8907911 |
| TPT1       | NM_001286273 | 51.51629496 | 6.401410102 | 0.001760719 | 8.047647962 |
| XRCC3      | NM_001100118 | 48.9784825  | 2.75364312  | 0.000209087 | 17.78679384 |
| RPS5       | NM_001009    | 59.5985678  | 2.598323523 | 1.93E-05    | 22.93731603 |
| CCNL1      | NM_020307    | 50.11969761 | 0.135272742 | 6.75E-07    | 370.5084768 |
| RPUSD3     | NM_001142547 | 41.33912609 | 2.30465664  | 0.002355476 | 17.93721692 |
| ANKRD54    | NM_138797    | 40.64082741 | 0.204820884 | 7.43E-06    | 198.4213066 |
| NECAB3     | NM_031231    | 38.26463011 | 2.205543819 | 0.002567973 | 17.34929489 |
| HEIH       | NR_045680    | 34.84098479 | 0.482774919 | 0.00286492  | 72.16817484 |
| TMEM179B   | NM_199337    | 67.49330646 | 8.579882635 | 0.000163904 | 7.866460338 |
| MAFF       | NM_012323    | 26.85247904 | 0.373559104 | 0.001786166 | 71.88281258 |
| PNMA1      | NM_006029    | 41.94365768 | 3.545751817 | 0.002026621 | 11.82927059 |
| JUN        | NM_002228    | 37.82171368 | 3.73226186  | 0.003725235 | 10.13372456 |
| EPPK1      | NM_031308    | 25.80503103 | 0.713860803 | 0.002982824 | 36.14854735 |
| FAM53C     | NM_016605    | 69.86950376 | 0.946810653 | 7.91E-08    | 73.79458984 |
| CNP        | NM_033133    | 55.73200605 | 0.619430078 | 9.98E-07    | 89.97303818 |
| RAB3A      | NM_002866    | 36.07596699 | 1.077385039 | 0.000608965 | 33.48474841 |
| CHTF18     | NM_022092    | 21.58931994 | 0.067608196 | 0.001340871 | 319.3299231 |
| VPS9D1     | NM_004913    | 127.5347907 | 4.267224153 | 3.51E-11    | 29.88706149 |
| CSNK1D     | NR_110578    | 51.70382914 | 0.579862248 | 3.74E-06    | 89.16571022 |
| LAMTOR1    | NM_017907    | 41.33912609 | 0.85579486  | 0.000134586 | 48.30494786 |
| GAS5       | NR_002578    | 107.0866859 | 6.182673812 | 1.39E-08    | 17.3204489  |
| SHARPIN    | NM_030974    | 62.92844603 | 12.81315979 | 0.004467837 | 4.911235563 |
| RELL2      | NM_173828    | 40.54706032 | 1.383965488 | 0.000667791 | 29.29773948 |
| RPLP0      | NM_053275    | 84.35615081 | 15.28176128 | 0.000155145 | 5.520054217 |
| PTMA       | NM_002823    | 87.43064679 | 15.38236304 | 0.000104935 | 5.683824166 |
| GLI4       | NM_138465    | 70.91695178 | 14.19340194 | 0.001492071 | 4.996473156 |
| MEF2BNB    | NM_001145784 | 42.38657411 | 0.74123405  | 0.000173197 | 57.18379252 |
| TRIM52     | NM_032765    | 61.18269933 | 0.227152826 | 8.47E-08    | 269.3459742 |
| PRELID1    | NM_001271828 | 62.32391444 | 7.596414496 | 0.000573104 | 8.204385698 |
| LAMTOR4    | NM_001008395 | 40.98997675 | 0.256684289 | 1.83E-05    | 159.690244  |
| RHOV       | NM_133639    | 53.89249226 | 2.277040293 | 9.68E-05    | 23.66778156 |
| RBM4B      | NM_001286135 | 41.33912609 | 1.724813398 | 0.000859708 | 23.96730344 |
| PAGR1      | NM_024516    | 54.49702385 | 4.265465418 | 0.000138706 | 12.77633705 |
| EXOSC4     | NM_019037    | 69.33282024 | 0.704774167 | 1.14E-07    | 98.37593866 |
| H2AFZ      | NM_002106    | 74.52813128 | 5.267740932 | 7.11E-06    | 14.14802517 |
| HNRNPA1    | NM_002136    | 68.28537222 | 5.07606763  | 4.82E-05    | 13.45241577 |
| APEH       | NM_001640    | 43.6215563  | 0.759409499 | 9.06E-05    | 57.44141515 |
| ZFYVE21    | NM_024071    | 39.84876165 | 0.092047806 | 4.32E-06    | 432.9137575 |
| POLR2L     | NM_021128    | 66.88877487 | 14.26439864 | 0.003557666 | 4.689210989 |
| RPS2       | NM_002952    | 114.2831258 | 22.39986895 | 4.43E-05    | 5.10195511  |
| TRNP1      | NM_001013642 | 70.75533662 | 6.900879746 | 2.23E-05    | 10.25308935 |
| HTR7P1     | NR_002774    | 74.87728062 | 2.013072929 | 2.22E-07    | 37.19551316 |
| SNRNP25    | NM_024571    | 29.92697502 | 0.402411605 | 0.001164973 | 74.36906546 |
| SMARCD2    | NM_001098426 | 38.96292879 | 0.350408333 | 9.78E-05    | 111.1929286 |
| MGC72080   | NR_002822    | 38.3583972  | 0.254631113 | 5.33E-05    | 150.6430096 |
| ABCA7      | NM_019112    | 53.79872517 | 0.779428923 | 1.78E-05    | 69.02325994 |
| ATPIF1     | NM_178190    | 62.92844603 | 3.432819257 | 5.66E-05    | 18.33141838 |
| TMED4      | NM_182547    | 60.39063357 | 5.470958091 | 0.000201616 | 11.03840179 |
| MKNK2      | NM_017572    | 101.9172938 | 5.071605557 | 2.98E-08    | 20.09566649 |
| TPRN       | NM_001128228 | 82.07372059 | 3.042365016 | 9.37E-08    | 26.97694726 |
| ZBTB3      | NM_024784    | 27.64454481 | 0.864210031 | 0.00286492  | 31.98822488 |
| SERTAD3    | NM_203344    | 52.05297848 | 3.467303147 | 0.000325946 | 15.01252595 |
| SPATA2L    | NM_152339    | 73.99144776 | 13.92684267 | 0.000589525 | 5.312865917 |
| SOCS3      | NM_003955    | 96.81574989 | 3.373788516 | 8.73E-09    | 28.69644894 |
| POP5       | NM_015918    | 44.41362207 | 3.380725876 | 0.000783163 | 13.13730356 |
| GADD45GIP1 | NM_052850    | 58.80650203 | 2.329739233 | 1.28E-05    | 25.24166705 |
| HMG2       | NM_005517    | 41.68827543 | 3.470523679 | 0.001152829 | 12.01209941 |
| EEF1A1     | NM_001402    | 651.675755  | 81.8984079  | 2.43E-37    | 7.957123609 |
| MLST8      | NM_001199174 | 39.49961231 | 2.423418579 | 0.00123671  | 16.29912911 |
| SLC9A3R1   | NM_004252    | 117.0084725 | 0.030847016 | 2.90E-19    | 3793.186093 |

|                        |              |             |             |             |             |
|------------------------|--------------|-------------|-------------|-------------|-------------|
| NFE2L3                 | NM_004289    | 45.64860427 | 1.796500116 | 0.00048702  | 25.4097419  |
| MESDC1                 | NM_022566    | 41.68827543 | 1.801355529 | 0.000280178 | 23.14272488 |
| FBXL6                  | NM_024555    | 65.65379267 | 7.132371283 | 0.00025462  | 9.205044167 |
| FAM173A                | NM_023933    | 93.48587166 | 11.39597477 | 4.59E-05    | 8.203411602 |
| SOX4                   | NM_003107    | 49.77054827 | 0.697385656 | 3.48E-06    | 71.36732427 |
| RNF40                  | NM_014771    | 19.91142131 | 0.092417669 | 0.003848688 | 215.4503725 |
| MDP1                   | NM_001199822 | 48.9784825  | 4.148257297 | 0.001415882 | 11.80700207 |
| PDLIM7                 | NM_213636    | 92.6000388  | 8.415267398 | 1.39E-06    | 11.00381419 |
| FTSJ3                  | NM_017647    | 80.04667263 | 5.723695455 | 2.93E-06    | 13.98513832 |
| LOC100129917           | NR_036512    | 73.64229842 | 8.401021622 | 0.000272055 | 8.765874168 |
| RPL29                  | NM_000992    | 59.15565137 | 2.216940731 | 1.70E-05    | 26.68346093 |
| SNHG5                  | NR_003038    | 100.3331623 | 6.841446572 | 6.86E-07    | 14.66548942 |
| KRT19                  | NM_002276    | 46.95143453 | 7.122562476 | 0.004296191 | 6.591930178 |
| RPL32                  | NM_001007073 | 63.46512955 | 1.390758798 | 1.84E-06    | 45.63345538 |
| TRIM72                 | NM_001008274 | 26.94624613 | 0.474639074 | 0.001786166 | 56.77207712 |
| ID2                    | NM_002166    | 75.13266286 | 10.72383669 | 0.000347855 | 7.006136426 |
| FHOD1                  | NM_013241    | 51.51629496 | 2.281793309 | 9.44E-05    | 22.57710844 |
| GPAA1                  | NM_003801    | 70.66156953 | 4.434347518 | 1.06E-05    | 15.93505453 |
| COX8A                  | NM_004074    | 61.08893224 | 3.128251904 | 9.06E-05    | 19.52813716 |
| MARCKSL1               | NR_052852    | 76.46141215 | 9.981996743 | 0.000156513 | 7.659931587 |
| TCTA                   | NM_022171    | 44.76277141 | 5.594288965 | 0.003128863 | 8.001512201 |
| RPS4X                  | NM_001007    | 55.82577314 | 2.226658609 | 1.32E-05    | 25.07154573 |
| CHPF                   | NM_024536    | 67.68084064 | 1.846518978 | 2.38E-07    | 36.65320608 |
| RPS9                   | NM_001013    | 117.4513889 | 5.487371126 | 7.59E-10    | 21.40394484 |
| SLC7A5P2               | NR_002594    | 128.3268565 | 8.828842657 | 3.31E-09    | 14.53495791 |
| SELM                   | NM_080430    | 60.73978291 | 6.941428718 | 0.000754517 | 8.750328696 |
| GNG13                  | NM_016541    | 51.26091271 | 4.279113808 | 0.000944841 | 11.97932914 |
| H2AFX                  | NM_002105    | 126.4873427 | 25.69643382 | 3.63E-05    | 4.922369522 |
| RTCA-AS1               | NR_110435    | 38.70754654 | 2.901754493 | 0.004255015 | 13.33935956 |
| TOB2                   | NM_016272    | 104.5488734 | 3.506785997 | 9.71E-10    | 29.81330297 |
| RPL10A                 | NM_007104    | 89.17639348 | 12.45753937 | 5.04E-05    | 7.158427589 |
| DDX56                  | NM_001257189 | 35.28390122 | 1.659735337 | 0.002620553 | 21.25875159 |
| CYTH2                  | NM_004228    | 39.49961231 | 3.122652631 | 0.001366194 | 12.64937762 |
| LINC00476              | NR_023389    | 58.80650203 | 1.912841157 | 5.70E-06    | 30.74301378 |
| MSX1                   | NM_002448    | 101.4743774 | 3.947455102 | 1.81E-09    | 25.70627779 |
| THAP7                  | NM_030573    | 69.07743799 | 12.42782884 | 0.001340516 | 5.558286879 |
| KLF16                  | NM_031918    | 22.82430213 | 0.238554189 | 0.002982824 | 95.67764124 |
| RPL23                  | NM_000978    | 76.01849572 | 2.675790635 | 1.30E-07    | 28.40973234 |
| GADD45A                | NM_001924    | 105.6900885 | 15.14870515 | 9.80E-06    | 6.976839767 |
| MRPL16                 | NM_017840    | 52.21459364 | 1.446958514 | 2.72E-05    | 36.0857572  |
| TNFSF9                 | NM_003811    | 75.03889577 | 3.000007155 | 9.92E-07    | 25.0129056  |
| C9orf142               | NM_183241    | 47.83726739 | 3.556431073 | 0.001588574 | 13.45091931 |
| SAT1                   | NM_002970    | 52.84504425 | 1.726929523 | 8.91E-05    | 30.60057954 |
| TPIIIP2                | NR_002187    | 52.40212782 | 1.120290102 | 2.06E-05    | 46.77549834 |
| DOK4                   | NM_018110    | 35.37766831 | 0.492865751 | 0.000164358 | 71.77952255 |
| STAG3L5P-PVRIG2P-PILRB | NR_036569    | 88.22271256 | 0.250443285 | 2.06E-12    | 352.2662325 |
| RBM14-RBM4             | NM_001198846 | 95.67453478 | 0.976171682 | 6.33E-10    | 98.00994699 |
| DUS1L                  | NM_022156    | 45.99775361 | 2.263149692 | 0.000144286 | 20.32466247 |
| RPL13AP5               | NR_026712    | 106.3883872 | 16.420353   | 8.47E-06    | 6.479056033 |
| RPS6                   | NM_001010    | 85.05444949 | 0.424182156 | 1.63E-10    | 200.5139731 |
| EME2                   | NM_001257370 | 51.95921139 | 3.822082102 | 0.00027856  | 13.59447809 |
| ENDOG                  | NM_004435    | 56.96698825 | 8.735370869 | 0.001207421 | 6.521416103 |
| LOC283335              | NR_033854    | 52.05297848 | 3.026104917 | 0.000359058 | 17.20131321 |
| SLX1B                  | NM_024044    | 170.176747  | 22.01985185 | 2.52E-09    | 7.728332969 |
| HSF1                   | NM_005526    | 79.34837395 | 0.759028624 | 7.32E-09    | 104.5393697 |
| UBE2S                  | NM_014501    | 96.46660055 | 8.91650642  | 1.36E-06    | 10.81887861 |
| C2orf47                | NM_024520    | 92.69380589 | 0.176487723 | 1.50E-13    | 525.2139028 |
| EFNA1                  | NM_182685    | 43.6215563  | 1.856393281 | 0.000218586 | 23.49801454 |
| INO80B-WBP1            | NR_037849    | 40.98997675 | 2.250407392 | 0.002171164 | 18.21446948 |
| CIB1                   | NM_001277764 | 30.36989145 | 1.18383937  | 0.001528375 | 25.65372653 |
| ABHD14A-ACY1           | NR_037192    | 46.69605229 | 0.752149166 | 6.63E-05    | 62.08349936 |
| CPSF1                  | NM_013291    | 100.4947775 | 5.815035399 | 1.09E-07    | 17.28188576 |

|              |              |             |             |             |             |
|--------------|--------------|-------------|-------------|-------------|-------------|
| NFE2L1       | NM_003204    | 71.01071887 | 0.921666478 | 3.89E-08    | 77.04600369 |
| UQCRQ        | NM_014402    | 80.14043972 | 6.611414759 | 9.53E-06    | 12.12152658 |
| INPP5E       | NM_019892    | 33.35062034 | 0.37188772  | 8.14E-05    | 89.67927289 |
| SRPR         | NM_001177842 | 38.96292879 | 1.792578088 | 0.000348275 | 21.73569399 |
| MICALL2      | NM_182924    | 108.227901  | 0.576957012 | 3.06E-13    | 187.5839944 |
| TUBA1B       | NM_006082    | 76.36764506 | 14.53256898 | 0.000598157 | 5.254930849 |
| TTC32        | NM_001008237 | 35.72681765 | 0.199436441 | 5.33E-05    | 179.1388645 |
| LENG8        | NM_052925    | 61.43808158 | 2.090399998 | 2.77E-06    | 29.39058632 |
| OAZ1         | NM_004152    | 110.1611818 | 4.878458554 | 1.25E-09    | 22.58114538 |
| TMEM223      | NM_001080501 | 99.54109653 | 10.78940718 | 6.58E-06    | 9.225817036 |
| GPS2         | NM_004489    | 59.15565137 | 9.05115569  | 0.002762003 | 6.53570145  |
| SOCS1        | NM_003745    | 145.2834679 | 10.582169   | 1.54E-09    | 13.72908218 |
| MRPS26       | NM_030811    | 60.39063357 | 3.062911092 | 3.79E-05    | 19.71674389 |
| THOC6        | NM_001142350 | 60.73978291 | 2.332078737 | 1.66E-05    | 26.04533969 |
| SOWAHC       | NM_023016    | 67.23792421 | 0.975019738 | 4.31E-08    | 68.96057752 |
| LOC101928068 | NR_111907    | 33.35062034 | 0.15879734  | 0.000148229 | 210.0200188 |
| MIR17HG      | NR_027349    | 30.81280788 | 0.174929628 | 0.000414507 | 176.14402   |
| ARL4D        | NM_001661    | 39.40584522 | 0.967662825 | 0.000855458 | 40.72270238 |
| IRF2BP1      | NM_015649    | 52.05297848 | 5.554143351 | 0.001226448 | 9.371918439 |
| GADD45B      | NM_015675    | 68.28537222 | 15.22239911 | 0.003480965 | 4.485848237 |
| ARPC5L       | NM_030978    | 82.07372059 | 0.867493139 | 1.54E-09    | 94.6102245  |
| RRAGA        | NM_006570    | 61.88099801 | 1.219566195 | 8.04E-06    | 50.74017161 |
| LRWD1        | NM_152892    | 74.43436419 | 4.586176873 | 7.74E-06    | 16.23015558 |
| CTC-338M12.4 | NR_109909    | 37.91548077 | 0.156351073 | 1.23E-05    | 242.5022095 |
| GNB2L1       | NM_006098    | 53.00665941 | 2.91637002  | 8.96E-05    | 18.17556039 |
| SLC25A30-AS1 | NR_047031    | 40.54706032 | 0.635385557 | 0.000104768 | 63.81489145 |
| UQCC3        | NM_001085372 | 81.28165483 | 13.72417722 | 0.000660938 | 5.922515683 |
| TUBA1C       | NM_032704    | 119.2909027 | 2.322094955 | 2.42E-12    | 51.37210363 |
| LRRRC73      | NM_001012974 | 40.29167807 | 0.769765026 | 0.000206927 | 52.34282764 |
| IRF7         | NM_001572    | 69.33282024 | 13.01709618 | 0.002421482 | 5.32628931  |
| C1orf213     | NR_033690    | 62.92844603 | 1.51116684  | 1.59E-06    | 41.64228882 |
| TRIM28       | NM_005762    | 80.23420681 | 3.928126683 | 7.15E-07    | 20.42556498 |
| TAX1BP3      | NM_014604    | 62.57929669 | 7.325750753 | 0.000420253 | 8.542373171 |
| POLR2A       | NM_000937    | 147.8212804 | 2.106043749 | 1.04E-15    | 70.1890834  |
| POLR2E       | NM_002695    | 30.53150661 | 1.114752356 | 0.003490154 | 27.3886002  |
| DPH1         | NM_001383    | 23.87175015 | 0.324004128 | 0.003724389 | 73.67730244 |
| OXLD1        | NM_001039842 | 48.09264964 | 1.280594774 | 0.0002026   | 37.55493199 |
| C7orf43      | NM_018275    | 68.82205574 | 2.55225216  | 2.19E-06    | 26.96522578 |
| LIPT2        | NM_001144869 | 82.07372059 | 3.015626228 | 3.58E-07    | 27.21614497 |
| KRI1         | NM_023008    | 47.7435003  | 1.906578742 | 0.000104768 | 25.04145213 |
| THUMPD3-AS1  | NR_027007    | 75.22642995 | 3.308891329 | 9.92E-07    | 22.73463299 |
| TUFM         | NM_003321    | 36.33134923 | 2.40012766  | 0.003055923 | 15.13725701 |
| FSCN1        | NM_003088    | 133.2408662 | 3.898373854 | 4.97E-12    | 34.17857579 |
| IMPDH2       | NM_000884    | 91.80797304 | 16.04456467 | 6.60E-05    | 5.722060707 |
| EMC10        | NM_206538    | 60.90139806 | 0.315681689 | 2.92E-08    | 192.9202743 |
| KLF2         | NM_016270    | 81.72457126 | 14.52064128 | 0.000286232 | 5.628165428 |
| ZNF696       | NM_030895    | 74.24683001 | 1.708682932 | 1.90E-07    | 43.45266675 |
| BOK          | NM_032515    | 35.9821999  | 0.047245482 | 5.95E-06    | 761.6008584 |
| NEAT1        | NR_028272    | 109.0199667 | 24.30879933 | 0.000104791 | 4.484794384 |
| RSRP1        | NM_020317    | 99.1919472  | 6.039240569 | 3.48E-08    | 16.42457293 |
| RPL23A       | NM_000984    | 74.78351352 | 3.036240574 | 6.72E-07    | 24.63029911 |
| MED29        | NM_017592    | 71.45363529 | 2.039748657 | 8.02E-07    | 35.03060785 |
| PPP1R15A     | NM_014330    | 73.89768067 | 6.580566383 | 4.07E-05    | 11.22968395 |
| MANF         | NM_006010    | 65.21087624 | 1.367472635 | 1.92E-07    | 47.68715261 |
| ESAM         | NM_138961    | 51.61006205 | 0.309548768 | 1.28E-06    | 166.7267565 |
| ASF1B        | NM_018154    | 68.63452156 | 0.271370274 | 9.01E-09    | 252.9183485 |
| C10orf10     | NM_007021    | 59.50480071 | 2.850954683 | 5.04E-05    | 20.87188585 |
| NDUFB7       | NM_004146    | 29.13490926 | 0.73996244  | 0.003718625 | 39.37349748 |
| TAF1D        | NM_024116    | 67.58707355 | 1.665809964 | 3.24E-07    | 40.57309959 |
| CCDC137      | NM_199287    | 72.31354913 | 0.75853713  | 3.17E-09    | 95.33290635 |
| VASN         | NM_138440    | 80.04667263 | 2.678136319 | 2.49E-07    | 29.8889463  |
| ARC          | NM_015193    | 99.98401296 | 2.262998695 | 2.46E-10    | 44.18209042 |



|           |              |             |             |             |             |
|-----------|--------------|-------------|-------------|-------------|-------------|
| RNF223    | NM_001205252 | 39.40584522 | 1.228586331 | 0.000342113 | 32.07413611 |
| LOC646719 | NR_046262    | 70.2186531  | 0.281236921 | 1.25E-09    | 249.6779326 |
| NOP56     | NR_027700    | 77.06594374 | 6.57787554  | 1.59E-05    | 11.71593218 |
| PRDX2     | NM_005809    | 59.24941846 | 2.075213756 | 5.70E-06    | 28.55099542 |
| ADM       | NM_001124    | 76.01849572 | 7.031258586 | 2.32E-05    | 10.81150619 |
| CALR      | NM_004343    | 112.5373791 | 3.898346796 | 5.70E-10    | 28.86797533 |
| SPCS1     | NM_014041    | 38.3583972  | 1.732742221 | 0.001209187 | 22.13739398 |
| PYURF     | NM_032906    | 76.62302731 | 0.661490932 | 1.55E-08    | 115.8338288 |
| H3F3B     | NM_005324    | 143.8609515 | 17.53010666 | 4.50E-08    | 8.206507486 |
| VPS4A     | NM_013245    | 41.68827543 | 0.487177627 | 9.06E-05    | 85.57099731 |
| B4GALT7   | NM_007255    | 55.73200605 | 1.388298718 | 4.34E-06    | 40.14410251 |
| TXNDC17   | NM_032731    | 62.23014735 | 4.464372988 | 9.82E-05    | 13.9392805  |
| TUBB2A    | NM_001069    | 84.35615081 | 5.687579309 | 4.84E-07    | 14.83164387 |
| SAPCD2    | NM_178448    | 68.02998997 | 1.72856539  | 9.92E-07    | 39.35633002 |
| SIX5      | NM_175875    | 33.001471   | 0.373698329 | 0.000280178 | 88.31045909 |
| TOE1      | NM_025077    | 49.67678118 | 3.570410487 | 0.000253776 | 13.91346495 |
| COX6A1    | NM_004373    | 58.3635856  | 0.369936669 | 1.28E-06    | 157.7664246 |
| C19orf24  | NM_017914    | 87.43064679 | 7.493173832 | 1.73E-06    | 11.6680393  |
| ID1I      | NM_004508    | 48.53556607 | 0.527477328 | 8.44E-06    | 92.01450657 |
| HNRNPA0   | NM_006805    | 72.94399974 | 0.476187672 | 2.65E-09    | 153.1833016 |
| RNF123    | NM_022064    | 56.26868957 | 0.89507276  | 1.41E-05    | 62.86493357 |
| PDAP1     | NM_014891    | 42.82949054 | 1.705881917 | 0.000433307 | 25.10694914 |
| RPS8      | NM_001012    | 70.91695178 | 6.634307359 | 5.98E-05    | 10.68942814 |
| KLC3      | NM_177417    | 46.6022852  | 0.09715415  | 2.25E-06    | 479.6736432 |
| INTS6-AS1 | NR_103812    | 63.37136246 | 8.49376277  | 0.002421482 | 7.460929175 |
| TUBG2     | NM_016437    | 61.34431449 | 1.293229761 | 8.96E-07    | 47.43496967 |
| RPL18A    | NM_000980    | 70.91695178 | 5.973702218 | 1.76E-05    | 11.87152442 |
| RPS12     | NM_001016    | 119.3846698 | 5.885125318 | 1.25E-09    | 20.28583307 |
| GFER      | NM_005262    | 51.70382914 | 1.276194678 | 1.35E-05    | 40.51406109 |
| FAM127A   | NM_001078171 | 55.91954023 | 5.60712582  | 0.001617876 | 9.972941936 |
| LINC00896 | NR_026919    | 30.02074211 | 0.974688111 | 0.00339551  | 30.80035733 |
| IMP3      | NM_018285    | 53.1004265  | 5.586377807 | 0.003359071 | 9.505341087 |
| PLK3      | NM_004073    | 78.55630818 | 4.561917884 | 1.62E-06    | 17.22001802 |
| WDR83OS   | NM_016145    | 73.64229842 | 11.81393245 | 0.001007866 | 6.23351274  |
| KAZALD1   | NM_030929    | 58.26981851 | 0.674352272 | 1.19E-06    | 86.4085745  |
| PNRC2     | NM_017761    | 64.25719532 | 0.537698789 | 8.12E-08    | 119.5040729 |
| HINT2     | NM_032593    | 35.09636704 | 0.866520645 | 0.001368939 | 40.50263226 |
| EXOSC6    | NM_058219    | 39.05669588 | 0.867012886 | 0.000442812 | 45.0474226  |

**Sheet3: Pausing genes in HMBA treated HCT116 cells expressing shBrd4**

| Symbol   | Gene ID      | Promoter RPK | Gene Body RPK | pValue      | Pause Ratio(TR) |
|----------|--------------|--------------|---------------|-------------|-----------------|
| APTX     | NR_036579    | 68.29546324  | 3.253199529   | 2.13E-06    | 20.99332139     |
| MPV17L   | NM_173803    | 34.58488231  | 2.358409563   | 0.003717262 | 14.66449376     |
| NUDT15   | NM_018283    | 96.22565948  | 5.989519418   | 3.57E-08    | 16.06567285     |
| CALU     | NM_001199672 | 112.5950864  | 4.653963327   | 1.41E-09    | 24.19337637     |
| LMLN     | NR_026787    | 93.55404248  | 2.623347524   | 1.26E-08    | 35.66208504     |
| NUDT4    | NM_001301022 | 54.98609113  | 3.541303129   | 5.91E-05    | 15.52707834     |
| AGFG1    | NM_004504    | 63.82653061  | 3.963050704   | 1.60E-05    | 16.10540348     |
| TMEM222  | NM_032125    | 105.9891132  | 17.60410414   | 9.03E-06    | 6.020704739     |
| MGST1    | NM_001260512 | 81.11897176  | 1.377316812   | 7.87E-09    | 58.89637812     |
| C2orf72  | NM_001144994 | 70.48121666  | 5.383385634   | 2.11E-05    | 13.09235887     |
| CHCHD3   | NM_017812    | 76.26160134  | 2.716331822   | 9.05E-07    | 28.07521553     |
| OCIAD1   | NM_001079840 | 61.64077717  | 2.774418555   | 7.69E-06    | 22.21754791     |
| MUTYH    | NM_001293190 | 142.759749   | 16.26675109   | 4.41E-09    | 8.77616853      |
| ENSA     | NM_207044    | 114.8295527  | 7.068841436   | 5.32E-09    | 16.24446577     |
| RBM10    | NM_001204466 | 119.6869232  | 6.483514586   | 2.62E-09    | 18.46019186     |
| AFF4     | NM_014423    | 122.7956908  | 5.992902821   | 4.05E-10    | 20.49018556     |
| TFDP1    | NR_026580    | 145.382653   | 11.58488317   | 1.56E-10    | 12.54934132     |
| WRNIP1   | NM_020135    | 86.02505507  | 8.499291076   | 2.44E-06    | 10.12143887     |
| PUF60    | NM_078480    | 140.5252827  | 35.08282006   | 9.52E-06    | 4.005529842     |
| EPT1     | NM_033505    | 75.82445064  | 4.717274613   | 3.82E-06    | 16.07378346     |
| CHST7    | NM_019886    | 48.76855577  | 4.657283369   | 0.001188746 | 10.47145984     |
| TAF1C    | NM_139353    | 90.00812411  | 14.29938758   | 2.70E-05    | 6.294543985     |
| IDNK     | NR_046422    | 113.08095    | 8.295623565   | 2.59E-08    | 13.63139842     |
| YY1AP1   | NM_001198906 | 76.26160134  | 6.520116472   | 1.59E-05    | 11.69635568     |
| CLPTM1   | NM_001282175 | 58.09485881  | 11.92006576   | 0.003129601 | 4.87370288      |
| FDXR     | NM_024417    | 267.7411932  | 33.22983332   | 1.89E-15    | 8.057253572     |
| GORAB    | NR_027397    | 40.80241766  | 2.820441665   | 0.001354744 | 14.46667668     |
| ST3GAL3  | NR_073021    | 119.2497724  | 6.39912466    | 1.08E-09    | 18.63532573     |
| ATP5G3   | NM_001689    | 90.4452748   | 12.24115015   | 1.11E-05    | 7.388625555     |
| GUSB     | NM_000181    | 57.65770813  | 10.54837793   | 0.002776569 | 5.466026011     |
| PDCD6    | NR_073609    | 90.8824255   | 11.61859942   | 9.41E-06    | 7.822149834     |
| GMDS     | NM_001500    | 62.95222924  | 1.325143817   | 1.94E-06    | 47.50596005     |
| ARNTL2   | NM_001248005 | 113.0322371  | 4.082834281   | 1.94E-09    | 27.68474773     |
| NPM1     | NM_002520    | 73.58998434  | 11.85319098   | 0.000121307 | 6.20845344      |
| GPR126   | NM_001032394 | 66.06099693  | 3.119301971   | 9.16E-06    | 21.17813458     |
| FERMT2   | NM_001134999 | 131.1989796  | 1.477192842   | 1.19E-12    | 88.81641983     |
| ZNF384   | NM_001135734 | 61.64077717  | 10.11862055   | 0.000989403 | 6.091816259     |
| C1orf131 | NM_001300830 | 126.3416091  | 0.847957544   | 7.50E-16    | 148.9952063     |
| RAE1     | NM_003610    | 54.11178977  | 3.625831452   | 6.41E-05    | 14.92396723     |
| LIPT1    | NM_001204830 | 120.1240738  | 6.646538584   | 4.83E-10    | 18.07317783     |
| PIEZO1   | NM_001142864 | 185.3107694  | 26.63209913   | 4.90E-10    | 6.958173612     |
| PLSCR3   | NM_020360    | 140.9624333  | 20.13999304   | 7.56E-08    | 6.999130192     |
| WTAP     | NM_001270531 | 152.9603533  | 6.368271704   | 8.13E-13    | 24.01913116     |
| NEK2     | NM_002497    | 119.6869232  | 0.751421385   | 4.22E-16    | 159.2806986     |
| GPRC5B   | NM_016235    | 52.31447414  | 4.590564397   | 0.000657868 | 11.39608763     |
| CDC27    | NM_001293091 | 139.6509813  | 5.304566764   | 8.23E-12    | 26.32655738     |
| SERF1A   | NM_021967    | 196.8228258  | 21.82160142   | 4.76E-12    | 9.019632521     |
| PRKAG1   | NM_002733    | 118.8126218  | 11.34311886   | 3.63E-08    | 10.47442271     |
| VARS2    | NM_001167733 | 56.29754319  | 6.871696753   | 0.000609883 | 8.192669905     |
| MYO1C    | NM_001080950 | 81.11897176  | 17.43184287   | 0.000398323 | 4.653493745     |
| PHF7     | NM_016483    | 113.0322371  | 12.53928815   | 9.86E-08    | 9.01424672      |
| ELP4     | NM_001288725 | 44.34833603  | 1.128809803   | 8.13E-05    | 39.28769569     |
| ZNF281   | NM_001281293 | 74.02713503  | 8.474059083   | 7.80E-05    | 8.73573506      |
| FIS1     | NM_016068    | 117.9383204  | 14.04936258   | 1.67E-07    | 8.394567352     |
| FN1      | NM_212476    | 42.55102041  | 2.710525594   | 0.001066259 | 15.6984389      |
| ITPR2    | NM_002223    | 105.066099   | 1.922030451   | 2.31E-09    | 54.66411779     |
| FAM200B  | NM_001145191 | 125.0301571  | 6.761662665   | 1.54E-10    | 18.49103738     |
| SLC43A3  | NM_199329    | 101.5201806  | 6.452140947   | 4.30E-08    | 15.73434019     |
| CCNB2    | NM_004701    | 115.7038541  | 8.799764202   | 2.61E-08    | 13.14851756     |
| OGT      | NM_181673    | 77.13590271  | 2.336247568   | 2.94E-07    | 33.01700717     |

|              |              |             |             |             |             |
|--------------|--------------|-------------|-------------|-------------|-------------|
| NEDD4L       | NM_015277    | 62.95222924 | 4.058824986 | 1.95E-05    | 15.50996396 |
| PPIP5K1      | NM_001130859 | 47.8942544  | 5.861379698 | 0.001544805 | 8.171157111 |
| PLAGL1       | NM_001289049 | 65.18669554 | 4.536595301 | 4.74E-05    | 14.36907884 |
| MOCS2        | NM_176806    | 95.30264523 | 1.945073546 | 1.90E-10    | 48.99693661 |
| TDP1         | NM_001008744 | 130.7618289 | 3.649743501 | 4.81E-12    | 35.82767636 |
| ST6GALNAC4   | NM_175040    | 55.86039251 | 10.42184699 | 0.002018124 | 5.359932128 |
| TBCK         | NM_001163437 | 72.27853228 | 2.164710944 | 2.86E-06    | 33.3894613  |
| FAS          | NR_028036    | 68.73261391 | 3.160576955 | 1.80E-06    | 21.74685663 |
| CLYBL        | NR_104592    | 114.392402  | 2.632876428 | 3.61E-10    | 43.44769118 |
| ATF2         | NR_045768    | 62.51507855 | 3.596418642 | 1.59E-05    | 17.38259218 |
| TPM4         | NM_001145160 | 108.1748666 | 10.21438548 | 1.68E-07    | 10.59044295 |
| CCT8         | NM_001282909 | 51.87732345 | 4.628684431 | 0.00054264  | 11.20779008 |
| BIRC6        | NM_016252    | 47.01995303 | 2.750951733 | 0.000675263 | 17.09224937 |
| NDC1         | NM_018087    | 93.11689181 | 3.675813536 | 1.48E-08    | 25.33232192 |
| MRPS18C      | NM_001297767 | 50.5658714  | 4.876490259 | 0.000826077 | 10.3693166  |
| ERGIC3       | NM_198398    | 86.02505507 | 9.049084822 | 8.40E-06    | 9.506492288 |
| CTSL         | NM_145918    | 50.12872071 | 2.398856044 | 6.17E-05    | 20.89692745 |
| NR1H3        | NM_001251934 | 62.51507855 | 13.2544046  | 0.002761774 | 4.716551248 |
| HDAC11-AS1   | NR_046690    | 33.27343024 | 1.715561575 | 0.002952174 | 19.39506616 |
| LINC00909    | NR_024484    | 51.00302207 | 9.390284485 | 0.004518548 | 5.431467188 |
| CHDH         | NM_018397    | 61.64077717 | 7.635558319 | 0.000308955 | 8.072857883 |
| TCEB1        | NM_001204857 | 71.8413816  | 9.470328656 | 0.00020439  | 7.585943869 |
| KPNA3        | NM_002267    | 73.58998434 | 3.415590599 | 1.30E-06    | 21.54531763 |
| RFXANK       | NM_001278727 | 131.6848432 | 17.95360668 | 1.34E-07    | 7.334729201 |
| PRADC1       | NM_032319    | 51.00302207 | 7.630158606 | 0.003529416 | 6.684398674 |
| SIK3         | NM_025164    | 109.049168  | 2.847168553 | 1.16E-09    | 38.30091755 |
| KDELR3       | NM_016657    | 62.51507855 | 12.54389298 | 0.002412233 | 4.983706307 |
| TNPO3        | NM_012470    | 129.0132262 | 4.687895396 | 1.14E-10    | 27.5205002  |
| ATG5         | NM_004849    | 50.5658714  | 2.796767899 | 0.000191292 | 18.08011005 |
| ZGPAT        | NM_181485    | 69.60691528 | 10.09283687 | 0.000362393 | 6.896665051 |
| CFLAR        | NM_001202517 | 79.37036901 | 8.124770125 | 1.29E-05    | 9.768937188 |
| LOC644656    | NR_036539    | 160.4893408 | 30.24648284 | 3.56E-06    | 5.306049687 |
| AKAP1        | NM_003488    | 94.42834386 | 13.81207807 | 1.13E-05    | 6.836650025 |
| ZNF518A      | NM_014803    | 159.6150394 | 5.476441267 | 3.26E-14    | 29.14575938 |
| EPC1         | NR_104159    | 203.0403612 | 36.01653988 | 4.30E-09    | 5.637419972 |
| B4GALT4      | NM_003778    | 78.49606764 | 4.581490203 | 2.59E-06    | 17.1333047  |
| AGPAT9       | NM_032717    | 40.80241766 | 2.649246258 | 0.001926948 | 15.40151941 |
| LOC100507053 | NR_037884    | 58.96916018 | 1.886618772 | 3.07E-05    | 31.25653209 |
| CENPBD1P1    | NR_026052    | 74.07584791 | 10.01767401 | 5.96E-05    | 7.39451572  |
| STK33        | NM_001289059 | 35.50789655 | 1.004941923 | 0.001065164 | 35.3332822  |
| LAX1         | NM_017773    | 37.69364998 | 2.886617158 | 0.001821155 | 13.05807037 |
| FGD5-AS1     | NR_046254    | 130.7618289 | 2.312476216 | 1.15E-14    | 56.54623734 |
| TMEM9B       | NM_001286095 | 69.1697646  | 7.822855155 | 7.76E-05    | 8.842010139 |
| ZNF101       | NM_033204    | 64.74954487 | 7.480593445 | 0.000120507 | 8.655669547 |
| ZFP90        | NM_133458    | 58.96916018 | 8.508089552 | 0.00054227  | 6.930951987 |
| LINC01128    | NR_047526    | 76.26160134 | 5.763727082 | 8.71E-06    | 13.23129986 |
| SCAMP5       | NM_001178111 | 55.42324183 | 10.23776517 | 0.004745324 | 5.413607453 |
| UPF3B        | NM_080632    | 33.71058093 | 3.015341293 | 0.004844575 | 11.17969001 |
| SPCS2        | NM_014752    | 125.9044585 | 2.944275415 | 1.39E-11    | 42.76245961 |
| ALG13        | NM_001257230 | 88.2108085  | 1.288367602 | 2.00E-08    | 68.46711169 |
| UBE2E1       | NM_182666    | 42.11386972 | 2.642521202 | 0.00108587  | 15.93700353 |
| DCUN1D4      | NM_001287757 | 41.23956835 | 2.645787067 | 0.001947804 | 15.58688107 |
| NUDT1        | NM_198949    | 151.6001885 | 17.48015666 | 1.93E-09    | 8.672701932 |
| DDX12P       | NR_033399    | 65.18669554 | 11.29989067 | 0.000645217 | 5.768789935 |
| DCLRE1A      | NM_001271816 | 52.36318702 | 4.417007266 | 0.000568772 | 11.85490172 |
| HOOK2        | NM_001100176 | 95.30264523 | 15.80710378 | 2.21E-05    | 6.029102266 |
| DAG1         | NM_004393    | 112.5950864 | 9.69036494  | 1.27E-07    | 11.61928236 |
| VPS13C       | NM_017684    | 50.5658714  | 0.1094408   | 3.06E-06    | 462.0385768 |
| NDUFA9       | NM_005002    | 68.73261391 | 1.138923466 | 7.83E-07    | 60.34875564 |
| BOD1         | NM_001159651 | 98.8485636  | 6.394364692 | 1.99E-08    | 15.45869971 |
| CCDC14       | NM_022757    | 59.40631088 | 3.492880522 | 2.31E-05    | 17.00782792 |
| ANKRD28      | NM_015199    | 36.38219793 | 2.253908913 | 0.00385244  | 16.14182264 |

|              |              |             |             |             |             |
|--------------|--------------|-------------|-------------|-------------|-------------|
| CD109        | NM_133493    | 47.45710371 | 2.564901266 | 0.000342898 | 18.50250703 |
| APAF1        | NM_013229    | 110.4093329 | 1.932315568 | 1.98E-10    | 57.138355   |
| CCNA2        | NM_001237    | 107.737716  | 1.411909179 | 4.09E-13    | 76.30640666 |
| RHOT1        | NM_001288755 | 95.73979591 | 3.744016102 | 8.67E-09    | 25.57141671 |
| TARBP1       | NM_005646    | 93.99119317 | 2.962264083 | 1.45E-08    | 31.7295118  |
| TEC          | NM_003215    | 130.3246782 | 2.694889692 | 5.37E-12    | 48.35993049 |
| PRPF40A      | NM_017892    | 80.2446704  | 3.024901192 | 2.85E-07    | 26.52803027 |
| SLC37A4      | NM_001164278 | 72.27853228 | 15.71276355 | 0.00239371  | 4.599988542 |
| FAM124A      | NM_001242312 | 70.04406598 | 3.373939941 | 2.00E-06    | 20.76031797 |
| MEIS3        | NM_001301059 | 70.91836734 | 13.80122755 | 0.00057605  | 5.138555036 |
| LINC00883    | NR_028301    | 48.76855577 | 1.950426105 | 3.59E-05    | 25.00405201 |
| NCK1-AS1     | NR_110175    | 75.82445064 | 5.080513169 | 2.00E-06    | 14.92456532 |
| KDM3A        | NM_001146688 | 74.02713503 | 4.206017993 | 6.74E-06    | 17.60028967 |
| CTNBL1       | NM_001281495 | 41.67671904 | 1.293063121 | 0.000148762 | 32.23100122 |
| LOC554206    | NR_038379    | 73.15283366 | 8.038588543 | 0.000326321 | 9.100208732 |
| LOC283922    | NR_026950    | 104.1917976 | 5.984316599 | 1.40E-08    | 17.41080972 |
| SEC14L1      | NM_001039573 | 63.38937993 | 9.065910695 | 0.000385199 | 6.992058721 |
| TBC1D14      | NM_001113361 | 143.6340504 | 8.47341662  | 6.48E-11    | 16.95113751 |
| RBM39        | NR_040724    | 136.1050629 | 10.45893899 | 5.88E-10    | 13.0132763  |
| LOC100507506 | NR_103764    | 54.11178977 | 5.342341388 | 0.000351958 | 10.12885285 |
| SC5D         | NM_006918    | 47.01995303 | 4.522611549 | 0.001991569 | 10.39663754 |
| LRCH1        | NM_001164211 | 66.06099693 | 1.393866857 | 7.92E-06    | 47.39405101 |
| DSN1         | NM_001145318 | 78.93321834 | 7.640970841 | 8.03E-06    | 10.33026038 |
| PACSIN3      | NM_016223    | 90.00812411 | 19.35327955 | 0.00024089  | 4.650794399 |
| NQO2         | NM_001290222 | 116.1410048 | 6.929528759 | 1.93E-09    | 16.76030345 |
| ZSWIM5       | NM_020883    | 81.11897176 | 3.845991216 | 4.88E-07    | 21.0918245  |
| SRR          | NM_021947    | 106.8634146 | 7.948967357 | 3.27E-08    | 13.44368518 |
| RPL22        | NM_000983    | 165.3467113 | 7.668898035 | 8.76E-14    | 21.56068714 |
| HHLA3        | NM_001036645 | 53.67463907 | 2.858579124 | 2.69E-05    | 18.77668476 |
| SLC35A2      | NM_001282647 | 67.37244898 | 9.326711521 | 0.000181845 | 7.223601677 |
| GLYCTK       | NR_026699    | 98.46012576 | 16.49123748 | 2.36E-05    | 5.970451029 |
| RBAK-RBAKDN  | NM_001204513 | 57.22055744 | 8.406453689 | 0.000939477 | 6.806741529 |
| API5         | NM_001142930 | 66.93529829 | 2.475798622 | 3.64E-06    | 27.03584116 |
| PHOSPHO2     | NM_001199288 | 164.4724099 | 7.045900196 | 1.33E-14    | 23.34299455 |
| MOB1B        | NM_173468    | 61.64077717 | 0.954716591 | 7.24E-07    | 64.56447677 |
| ZCCHC17      | NM_001282571 | 108.6120173 | 2.567389597 | 3.78E-10    | 42.30445486 |
| SAR1A        | NM_020150    | 140.5252827 | 7.647281859 | 1.36E-11    | 18.37584717 |
| METRNL       | NM_001004431 | 109.4863187 | 25.95418868 | 0.000117355 | 4.218445047 |
| OGDH         | NM_001003941 | 173.7987129 | 6.938717501 | 6.58E-14    | 25.04767096 |
| TBRG4        | NM_199122    | 128.5760755 | 14.15133144 | 1.95E-08    | 9.085793525 |
| OSGIN2       | NM_004337    | 69.1697646  | 7.026327188 | 8.99E-05    | 9.844370003 |
| PMS2         | NM_000535    | 110.8464837 | 4.011914759 | 1.22E-09    | 27.62932174 |
| MTDH         | NM_178812    | 104.6289483 | 4.725349672 | 1.25E-08    | 22.14205414 |
| SSB          | NM_003142    | 84.22773945 | 5.507751099 | 1.72E-06    | 15.29258275 |
| ENOSF1       | NM_001126123 | 106.377551  | 7.940033213 | 6.21E-08    | 13.39762041 |
| CCDC47       | NM_020198    | 116.5781554 | 8.165731373 | 4.04E-09    | 14.2765112  |
| GEM          | NM_181702    | 128.5760755 | 9.263921741 | 5.80E-10    | 13.8792273  |
| XIAP         | NM_001167    | 84.22773945 | 2.851741824 | 1.22E-07    | 29.53554166 |
| ZNF76        | NM_003427    | 137.4165149 | 7.794260853 | 7.32E-11    | 17.6304742  |
| ETNK1        | NM_018638    | 99.33442714 | 1.770719086 | 1.54E-09    | 56.09835457 |
| INO80C       | NM_001098817 | 114.8295527 | 4.668913745 | 5.91E-10    | 24.59449006 |
| CHTF8        | NM_001039690 | 176.8587677 | 10.50114279 | 9.91E-14    | 16.84185914 |
| CARS         | NM_001014437 | 82.4791367  | 10.72512917 | 3.02E-05    | 7.690269776 |
| ZC3H11A      | NM_014827    | 75.82445064 | 4.898088823 | 4.20E-06    | 15.4804156  |
| SH3BP4       | NM_014521    | 66.06099693 | 9.92698253  | 0.000750233 | 6.65469056  |
| MATN1-AS1    | NR_034182    | 80.2446704  | 11.67302403 | 6.16E-05    | 6.874368643 |
| RBBP8        | NM_203291    | 93.99119317 | 3.021963272 | 1.53E-08    | 31.1026921  |
| ATP2C1       | NM_001199183 | 73.58998434 | 1.550216    | 1.00E-06    | 47.47079397 |
| PDLIM5       | NR_046186    | 137.8536657 | 5.605123452 | 2.02E-12    | 24.5942247  |
| SKP1         | NM_170679    | 179.5303847 | 6.328416709 | 6.86E-16    | 28.3689259  |
| SCMH1        | NM_001172218 | 80.2446704  | 4.256957429 | 3.21E-06    | 18.85024028 |
| GLTSCR2      | NM_015710    | 196.8228258 | 22.81589158 | 7.44E-12    | 8.62656737  |

|           |              |             |             |             |             |
|-----------|--------------|-------------|-------------|-------------|-------------|
| HCCS      | NM_005333    | 74.02713503 | 1.806888339 | 3.39E-08    | 40.96940216 |
| CMTR2     | NM_018348    | 39.49096561 | 2.926590879 | 0.002822269 | 13.49384565 |
| TPD52L2   | NR_045090    | 129.4503768 | 14.29051915 | 5.15E-08    | 9.058479644 |
| DLST      | NM_001933    | 93.11689181 | 10.46203457 | 2.14E-06    | 8.900457286 |
| PSMA1     | NM_148976    | 84.66489013 | 0.974382098 | 4.44E-09    | 86.89085142 |
| MPND      | NM_001300862 | 120.1240738 | 19.33699857 | 2.27E-06    | 6.212136459 |
| RNF138P1  | NR_001575    | 39.05381491 | 0.248771946 | 1.13E-05    | 156.9864111 |
| MTIF3     | NM_152912    | 83.35343807 | 6.160212329 | 2.39E-06    | 13.53093589 |
| EIF3D     | NM_003753    | 125.9044585 | 11.38640392 | 1.29E-08    | 11.05743827 |
| CLASRP    | NM_007056    | 150.2887363 | 14.81570563 | 7.73E-10    | 10.14387975 |
| TMC4      | NM_001145303 | 86.89935644 | 20.51510987 | 0.000801854 | 4.235870878 |
| AKR1E2    | NM_001271021 | 50.5658714  | 5.320452694 | 0.000653116 | 9.504054318 |
| BANK1     | NM_017935    | 65.18669554 | 1.55561759  | 9.13E-06    | 41.90406175 |
| SMG1P5    | NR_002453    | 113.08095   | 2.063661724 | 7.08E-11    | 54.7962627  |
| USP10     | NR_073577    | 155.5832575 | 8.257337182 | 4.94E-12    | 18.84181959 |
| CRB3      | NM_174881    | 61.2036265  | 10.78010979 | 0.003106343 | 5.677458548 |
| MADD      | NM_003682    | 94.42834386 | 8.275753753 | 7.73E-07    | 11.41024089 |
| PSMC3IP   | NM_001256016 | 89.57097344 | 16.93920116 | 9.05E-05    | 5.287792062 |
| CCDC61    | NM_001267723 | 108.6120173 | 9.740212877 | 1.15E-07    | 11.15088743 |
| ZNF619    | NM_001145083 | 86.46220574 | 2.506866739 | 2.11E-08    | 34.49014835 |
| DHRS4L1   | NR_102689    | 104.6289483 | 7.476339816 | 1.79E-08    | 13.99467532 |
| PRPF3     | NM_004698    | 78.93321834 | 2.890285673 | 1.34E-07    | 27.30983275 |
| SECISBP2L | NM_014701    | 44.78548671 | 2.329884118 | 0.000514721 | 19.22219494 |
| SLC35A3   | NM_012243    | 124.5930065 | 2.062084487 | 3.18E-12    | 60.42090284 |
| TRMT10B   | NM_001286953 | 54.54894044 | 7.415992078 | 0.001544638 | 7.35558235  |
| LSM4      | NM_001252129 | 93.55404248 | 20.08472516 | 0.000212064 | 4.657969761 |
| ZSCAN22   | NM_181846    | 101.5201806 | 2.343138138 | 3.40E-10    | 43.32658794 |
| IDS       | NM_006123    | 81.11897176 | 1.09663415  | 5.28E-09    | 73.97086051 |
| PPCDC     | NR_125369    | 129.4503768 | 14.36907378 | 5.31E-08    | 9.008957626 |
| FAM46C    | NM_017709    | 123.2328415 | 8.086432474 | 8.49E-10    | 15.23945719 |
| C11orf49  | NR_103471    | 45.22263741 | 3.097339339 | 0.000674189 | 14.60047882 |
| ARHGAP29  | NM_004815    | 62.51507855 | 5.241423713 | 8.83E-05    | 11.92711789 |
| EPHB3     | NM_004443    | 77.13590271 | 15.65665045 | 0.000624425 | 4.926718072 |
| PARP14    | NM_017554    | 86.46220574 | 4.040773657 | 5.54E-07    | 21.39743848 |
| IST1      | NM_001270979 | 70.04406598 | 3.786793666 | 9.19E-06    | 18.49693228 |
| ATE1      | NM_001288734 | 139.6509813 | 1.599528416 | 6.78E-13    | 87.30759637 |
| SYK       | NM_001174168 | 38.56795136 | 2.536985418 | 0.003660264 | 15.20227554 |
| TTLL4     | NM_014640    | 129.8875276 | 7.203313796 | 5.16E-10    | 18.03163533 |
| CLPX      | NM_006660    | 82.4791367  | 5.652254554 | 1.00E-06    | 14.59225445 |
| UBA52     | NM_001033930 | 147.6171194 | 35.04634692 | 5.26E-06    | 4.212054391 |
| IBTK      | NM_015525    | 77.62176628 | 3.282523296 | 6.29E-07    | 23.64698108 |
| NUP210    | NM_024923    | 144.5083517 | 10.73902254 | 2.08E-10    | 13.45637847 |
| SEC16A    | NM_014866    | 109.049168  | 12.28443449 | 7.94E-07    | 8.877019783 |
| RPS27L    | NM_015920    | 133.4334458 | 1.577306874 | 3.73E-16    | 84.5957423  |
| CCDC9     | NM_015603    | 94.42834386 | 12.47724817 | 6.82E-06    | 7.568042456 |
| TCERG1    | NM_001040006 | 73.58998434 | 1.734319105 | 6.58E-07    | 42.43162872 |
| STIM1     | NM_001277962 | 48.76855577 | 2.244459418 | 0.000363429 | 21.72841949 |
| ETV4      | NM_001986    | 59.40631088 | 11.82833059 | 0.001634352 | 5.022374917 |
| MGRN1     | NR_102267    | 111.2836343 | 10.71314577 | 1.33E-07    | 10.38757772 |
| CNOT7     | NM_013354    | 90.8824255  | 5.250196437 | 6.28E-08    | 17.3102905  |
| MIEF1     | NM_019008    | 72.71568297 | 15.17776357 | 0.001525748 | 4.79093528  |
| ATP5S     | NM_001003803 | 90.8824255  | 6.102111864 | 2.99E-07    | 14.89360201 |
| SLC35A1   | NM_006416    | 113.9552513 | 2.972211193 | 4.96E-11    | 38.34022683 |
| ZDHHC4    | NM_018106    | 165.3467113 | 13.3347557  | 5.80E-12    | 12.39968058 |
| C6orf203  | NM_001142470 | 119.6869232 | 6.257931262 | 1.13E-09    | 19.12563724 |
| TOM1L2    | NM_001288786 | 73.15283366 | 6.719370908 | 1.01E-05    | 10.88685751 |
| PGF       | NM_002632    | 72.27853228 | 15.85760702 | 0.001481079 | 4.557972221 |
| ATAD2B    | NR_125717    | 128.5760755 | 2.227980865 | 1.11E-11    | 57.70968572 |
| LRRC8E    | NM_001268285 | 76.69875203 | 16.72709197 | 0.000550779 | 4.585301028 |
| FYCO1     | NM_024513    | 45.22263741 | 6.781851768 | 0.002812387 | 6.668184288 |
| GUCD1     | NM_001284252 | 141.8854476 | 16.02986392 | 7.27E-09    | 8.851319532 |
| MIER3     | NM_001297598 | 133.8705966 | 3.6399589   | 3.81E-12    | 36.7780517  |

|              |              |             |             |             |             |
|--------------|--------------|-------------|-------------|-------------|-------------|
| SARNP        | NM_033082    | 60.76647581 | 6.145288291 | 0.000159252 | 9.888303516 |
| EXD2         | NR_034164    | 67.42116185 | 3.912603127 | 2.22E-05    | 17.23179164 |
| RAF1         | NM_002880    | 75.38729997 | 5.189706201 | 8.73E-06    | 14.52631364 |
| SEC14L4      | NM_001161368 | 114.392402  | 10.36551124 | 2.58E-08    | 11.03586686 |
| CWC27        | NM_001297645 | 39.49096561 | 0.839224072 | 0.000121111 | 47.05652153 |
| TCAIM        | NM_001029840 | 56.34625608 | 4.260050043 | 0.000168472 | 13.2266653  |
| GTF2F1       | NM_002096    | 75.82445064 | 9.827209553 | 4.73E-05    | 7.715766132 |
| SMIM14       | NM_174921    | 69.60691528 | 4.724677507 | 2.84E-05    | 14.73262782 |
| RNF41        | NR_040053    | 109.4863187 | 10.38180358 | 1.03E-07    | 10.54598249 |
| CANT1        | NM_001159773 | 140.0881319 | 21.4678904  | 6.87E-08    | 6.525472663 |
| KDM8         | NM_001145348 | 115.2667034 | 6.369739361 | 2.53E-09    | 18.09598428 |
| HELQ         | NM_001297757 | 86.89935644 | 3.014348374 | 5.96E-08    | 28.82857111 |
| ZNF317       | NM_001190791 | 79.37036901 | 4.307326485 | 1.00E-06    | 18.4268291  |
| IP6K2        | NM_001146178 | 97.53711154 | 10.07550534 | 1.24E-06    | 9.680617323 |
| TRPM2-AS     | NR_109964    | 97.09996085 | 7.237959906 | 3.20E-07    | 13.415377   |
| UBR5         | NM_015902    | 116.6268684 | 5.481190631 | 1.67E-09    | 21.27765229 |
| RASAL2-AS1   | NR_027982    | 43.47403467 | 1.299449364 | 9.40E-05    | 33.45573585 |
| TRAPPC5      | NM_174894    | 84.22773945 | 16.9620088  | 0.000924712 | 4.965670073 |
| RNF32        | NM_001184996 | 119.2497724 | 6.733728995 | 2.35E-09    | 17.70932161 |
| SERF1B       | NM_022978    | 200.3687442 | 21.54909177 | 2.70E-12    | 9.298245436 |
| ZSCAN16-AS1  | NR_103456    | 66.06099693 | 6.760919787 | 0.000116589 | 9.771007349 |
| DHX15        | NM_001358    | 74.07584791 | 2.310613715 | 7.65E-07    | 32.05894929 |
| TM9SF1       | NM_001014842 | 93.11689181 | 22.27331765 | 0.000268596 | 4.180647592 |
| SBDSP1       | NR_024111    | 64.31239418 | 8.496152649 | 0.000282592 | 7.569590242 |
| TPGS2        | NM_001271953 | 30.60181325 | 0.469829674 | 0.000865077 | 65.13384515 |
| HNRNPA1P10   | NR_002944    | 146.742818  | 21.94155248 | 4.58E-08    | 6.687895861 |
| CYB561A3     | NM_001161454 | 90.4452748  | 16.52063905 | 4.12E-05    | 5.47468379  |
| NR4A1        | NM_002135    | 151.6001885 | 20.22045682 | 7.08E-09    | 7.497367137 |
| MMADHC       | NM_015702    | 79.8075197  | 3.494738906 | 5.37E-07    | 22.83647558 |
| ITM2C        | NM_001012514 | 82.91628738 | 17.18364784 | 0.000531445 | 4.82530183  |
| SRSF10       | NM_001300936 | 89.57097344 | 21.12315839 | 0.000546481 | 4.240415746 |
| CPEB2        | NM_001177383 | 45.27135028 | 0.178201709 | 6.06E-06    | 254.0455455 |
| BRD7         | NM_013263    | 81.11897176 | 3.146622059 | 2.37E-07    | 25.77969971 |
| UNG          | NM_080911    | 76.26160134 | 6.271459674 | 7.76E-06    | 12.16010392 |
| RBM5         | NM_005778    | 57.22055744 | 8.597693939 | 0.000966884 | 6.655337797 |
| PPP1R3F      | NM_033215    | 63.82653061 | 5.54484413  | 5.06E-05    | 11.51096931 |
| AHSA2        | NM_152392    | 155.1461068 | 11.34444736 | 3.27E-11    | 13.67595105 |
| HARS         | NM_001289093 | 58.09485881 | 11.19725607 | 0.002687631 | 5.18831207  |
| ZNF138       | NM_001160183 | 61.64077717 | 0.988026931 | 3.01E-06    | 62.38775001 |
| 2-Sep        | NM_001008491 | 110.8464837 | 6.875188317 | 1.59E-08    | 16.12268327 |
| PSMB1        | NM_002793    | 125.4673077 | 3.98812122  | 7.50E-12    | 31.4602543  |
| LOC100287015 | NR_040040    | 122.7956908 | 5.848112327 | 2.07E-10    | 20.99749183 |
| PAQR3        | NM_001040202 | 143.1968996 | 0.51278865  | 2.52E-19    | 279.2513048 |
| FANCA        | NM_001286167 | 124.1558557 | 15.81694188 | 2.61E-07    | 7.849548707 |
| ATAD2        | NM_014109    | 176.0331791 | 9.713150136 | 3.52E-13    | 18.12318112 |
| MLLT11       | NM_006818    | 62.07792787 | 11.38526343 | 0.001902031 | 5.452480588 |
| NUDT22       | NM_001128613 | 103.754647  | 19.67814211 | 6.58E-05    | 5.272583477 |
| LOC101928736 | NR_110941    | 125.0301571 | 19.80746635 | 9.32E-07    | 6.312274113 |
| CCT6A        | NM_001009186 | 65.18669554 | 10.10093987 | 0.000440481 | 6.453527729 |
| SUN2         | NM_015374    | 91.75672686 | 15.46729726 | 5.04E-05    | 5.932305127 |
| DEDD         | NM_001039712 | 51.44017277 | 7.393466757 | 0.001994874 | 6.957517286 |
| YEATS2       | NM_018023    | 75.82445064 | 3.181211276 | 7.36E-07    | 23.83508798 |
| UNC5A        | NM_133369    | 94.86549455 | 11.49216591 | 3.68E-06    | 8.254796815 |
| BRCC3        | NM_001018055 | 42.11386972 | 3.858137601 | 0.00105999  | 10.91559557 |
| THADA        | NR_073394    | 119.2497724 | 4.18161385  | 1.10E-09    | 28.51764335 |
| TSSC1        | NM_003310    | 84.66489013 | 1.313372731 | 9.35E-08    | 64.46371861 |
| PGAP2        | NR_027017    | 59.40631088 | 11.80677641 | 0.001813289 | 5.031543649 |
| APP          | NM_201414    | 83.79058876 | 0.855916605 | 1.50E-08    | 97.89573924 |
| DCAF8        | NR_028103    | 114.392402  | 6.717780914 | 1.01E-08    | 17.02830197 |
| GABPB2       | NM_144618    | 101.0830299 | 3.809199184 | 2.20E-08    | 26.53655664 |
| DOPEY1       | NM_001199942 | 47.01995303 | 2.441978101 | 0.000597554 | 19.25486269 |
| ESCO2        | NM_001017420 | 103.3174962 | 3.991601685 | 6.66E-09    | 25.88371896 |

|               |              |             |             |             |             |
|---------------|--------------|-------------|-------------|-------------|-------------|
| PIK3R4        | NM_014602    | 52.31447414 | 0.917255989 | 1.02E-05    | 57.03366866 |
| TNIK          | NM_001161565 | 59.40631088 | 3.156537029 | 3.54E-05    | 18.82008997 |
| PDLIM3        | NM_001257963 | 66.49814761 | 4.104723543 | 3.40E-05    | 16.20039618 |
| PLCG2         | NM_002661    | 111.7207851 | 4.652718373 | 5.32E-09    | 24.01193799 |
| MAP4K4        | NM_001242559 | 52.75162482 | 2.348854681 | 0.000195502 | 22.45844549 |
| ZNHIT3        | NM_001281433 | 68.29546324 | 11.60676547 | 0.000666507 | 5.884108146 |
| RAD50         | NM_005732    | 133.4334458 | 5.130873026 | 3.31E-11    | 26.00599258 |
| CD81-AS1      | NR_108080    | 79.37036901 | 7.750432977 | 1.22E-05    | 10.24076581 |
| WDR20         | NM_001242417 | 82.91628738 | 4.764733405 | 1.36E-06    | 17.40208325 |
| CIPC          | NM_033426    | 58.96916018 | 5.345518249 | 9.52E-05    | 11.03151415 |
| CKMT2-AS1     | NR_034122    | 36.8193486  | 3.554830107 | 0.0036246   | 10.35755507 |
| CBWD5         | NM_001286836 | 73.63869723 | 12.34196614 | 0.000439211 | 5.966528866 |
| TSC1          | NM_001162426 | 76.26160134 | 4.274946607 | 3.76E-06    | 17.83919388 |
| REV1          | NM_001037872 | 131.1989796 | 2.581964667 | 3.10E-12    | 50.81362314 |
| STAMPB        | NM_006463    | 125.4673077 | 5.018552465 | 7.59E-11    | 25.00069664 |
| FAM114A1      | NM_138389    | 94.86549455 | 2.956117863 | 1.32E-08    | 32.09124228 |
| PRDX6         | NM_004905    | 90.00812411 | 4.347811399 | 1.90E-08    | 20.70193848 |
| PMS2P5        | NR_027777    | 101.5201806 | 2.012864488 | 1.75E-10    | 50.43567573 |
| ZNF670-ZNF695 | NR_037894    | 47.8942544  | 3.223655835 | 0.000354865 | 14.85712398 |
| CDC42EP3      | NM_006449    | 56.78340675 | 6.083544881 | 0.000235986 | 9.333934058 |
| ZBTB24        | NM_001164313 | 122.7956908 | 15.16240859 | 3.17E-07    | 8.098692902 |
| WDR47         | NM_014969    | 35.94504724 | 3.838037286 | 0.003705444 | 9.3654763   |
| PPIA          | NM_021130    | 179.9675353 | 20.8150825  | 3.80E-11    | 8.646015952 |
| TGOLN2        | NM_001206840 | 180.8418367 | 12.18769654 | 1.26E-13    | 14.83806526 |
| INPP5F        | NM_014937    | 122.7956908 | 4.566581136 | 3.76E-10    | 26.89007097 |
| CHCHD2        | NM_016139    | 80.68182108 | 8.252229516 | 1.81E-05    | 9.776972504 |
| AP1S3         | NM_001039569 | 116.1410048 | 5.279019983 | 1.18E-09    | 22.00048591 |
| VWA8          | NM_015058    | 125.9044585 | 1.722159552 | 3.04E-11    | 73.10847496 |
| GIN51         | NM_021067    | 91.31957618 | 5.497888984 | 1.73E-07    | 16.60993455 |
| SON           | NM_032195    | 61.2036265  | 8.642314551 | 0.000466418 | 7.081855924 |
| KLHL21        | NM_014851    | 144.071201  | 22.66327714 | 8.62E-08    | 6.357033013 |
| LRRC16A       | NM_017640    | 61.64077717 | 2.548346006 | 1.86E-05    | 24.18854309 |
| CAST          | NM_173060    | 86.02505507 | 3.174327473 | 8.80E-08    | 27.10024589 |
| 3-Sep         | NM_145733    | 52.75162482 | 6.435577058 | 0.002430731 | 8.19687564  |
| GOPC          | NM_020399    | 63.87524348 | 1.618652624 | 6.20E-06    | 39.46198371 |
| AP2M1         | NM_001025205 | 133.4334458 | 19.78546593 | 8.30E-08    | 6.744013325 |
| ABI1          | NM_001178124 | 45.22263741 | 2.674870763 | 0.000619771 | 16.90647564 |
| PPP1R9A       | NM_017650    | 74.02713503 | 0.473040458 | 8.93E-08    | 156.4921853 |
| MLLT10        | NM_001195626 | 63.38937993 | 3.457689856 | 1.82E-05    | 18.33287038 |
| ANKRD46       | NM_001270377 | 66.54686048 | 5.628152634 | 4.20E-05    | 11.82392604 |
| ZFYVE19       | NM_001077268 | 94.86549455 | 16.67962069 | 4.19E-05    | 5.687509105 |
| CCNG1         | NM_004060    | 187.108085  | 12.13034172 | 4.00E-14    | 15.42479918 |
| GPR63         | NM_001143957 | 43.91118534 | 1.97319554  | 0.00082309  | 22.25384381 |
| TCEB3-AS1     | NR_038280    | 62.51507855 | 8.118847497 | 0.000256654 | 7.69999419  |
| LEMD3         | NM_014319    | 50.12872071 | 3.453749049 | 0.000178562 | 14.51429157 |
| DUSP3         | NM_004090    | 111.7207851 | 10.23932012 | 1.32E-07    | 10.91095735 |
| CENPK         | NM_022145    | 56.73469387 | 3.089115098 | 4.06E-05    | 18.36600194 |
| HMGXB4        | NM_001003681 | 91.75672686 | 1.575754529 | 3.75E-09    | 58.2303431  |
| FAM76A        | NM_001143913 | 58.09485881 | 6.186378983 | 0.000252728 | 9.390769459 |
| INTS2         | NR_026641    | 113.08095   | 5.533466797 | 1.81E-09    | 20.43582335 |
| KBTBD3        | NM_152433    | 56.29754319 | 2.359785652 | 2.29E-05    | 23.85705801 |
| IRAK4         | NM_016123    | 65.62384623 | 2.902663145 | 3.99E-06    | 22.60815085 |
| NFYA          | NM_002505    | 90.4452748  | 4.964009257 | 1.17E-07    | 18.22020672 |
| RTFDC1        | NM_001283035 | 35.94504724 | 1.216637522 | 0.002629402 | 29.54458217 |
| PIK3R2        | NM_005027    | 84.66489013 | 18.55711477 | 0.000361337 | 4.562395135 |
| ZBTB5         | NM_014872    | 94.86549455 | 5.059391082 | 5.72E-08    | 18.75037786 |
| LINC01024     | NR_102741    | 226.5016248 | 15.53875356 | 6.29E-17    | 14.57656329 |
| FAM160B1      | NM_020940    | 130.3246782 | 2.383037545 | 5.61E-13    | 54.68847037 |
| DNAJC19       | NR_046073    | 72.27853228 | 11.24063395 | 0.000258667 | 6.430111737 |
| NANOS1        | NM_199461    | 148.4914208 | 22.66808489 | 3.84E-08    | 6.550682227 |
| RAP2B         | NM_002886    | 71.40423091 | 10.03884362 | 0.00010194  | 7.112794425 |
| ARHGAP12      | NM_001270696 | 126.7787599 | 3.2640819   | 2.08E-11    | 38.84055725 |

|              |              |             |             |             |             |
|--------------|--------------|-------------|-------------|-------------|-------------|
| RTN3         | NM_201429    | 70.52992954 | 2.331746534 | 1.85E-06    | 30.24768281 |
| TMEM136      | NM_001198672 | 62.51507855 | 7.527898512 | 0.000142561 | 8.30445289  |
| TMPPE        | NM_001136238 | 55.42324183 | 9.337357777 | 0.0026627   | 5.935645088 |
| ZNF562       | NM_001300885 | 48.38011797 | 3.58069804  | 0.000233944 | 13.51136494 |
| METTL14      | NM_020961    | 47.45710371 | 5.156397037 | 0.001246067 | 9.203539482 |
| MED7         | NM_001100816 | 72.71568297 | 0.986001007 | 7.09E-09    | 73.74808186 |
| DDHD1        | NM_001160148 | 75.82445064 | 3.565802235 | 7.71E-07    | 21.26434548 |
| TP73         | NM_001204186 | 90.8824255  | 12.57944643 | 2.27E-05    | 7.224676064 |
| PSMD6        | NM_014814    | 56.73469387 | 4.981608955 | 0.000129406 | 11.38882927 |
| MXD1         | NM_002357    | 73.58998434 | 6.284819217 | 5.95E-06    | 11.70916486 |
| SSFA2        | NM_006751    | 52.31447414 | 5.912483385 | 0.000814199 | 8.848138883 |
| AK2          | NM_001625    | 85.58790438 | 5.429998712 | 3.98E-07    | 15.76204875 |
| ARHGEF40     | NM_018071    | 58.5320095  | 10.27043822 | 0.002707045 | 5.699076151 |
| RPE          | NM_001278285 | 79.37036901 | 2.830493799 | 6.08E-08    | 28.04117396 |
| R3HCC1       | NM_001136108 | 96.66281017 | 23.61158667 | 0.000229478 | 4.093871857 |
| ZNF669       | NM_024804    | 72.27853228 | 7.607064721 | 2.82E-05    | 9.501500899 |
| IQCD         | NM_138451    | 47.8942544  | 7.509795952 | 0.004549931 | 6.37757067  |
| PLK2         | NM_006622    | 123.2328415 | 5.034178897 | 2.51E-11    | 24.47923365 |
| C18orf21     | NM_001201475 | 112.1579357 | 1.758430558 | 1.86E-12    | 63.78297693 |
| FAIM         | NM_018147    | 90.00812411 | 1.563133309 | 1.21E-09    | 57.58186047 |
| C3orf52      | NM_024616    | 46.58280234 | 4.977235982 | 0.00235994  | 9.359170935 |
| FANCI        | NM_018193    | 103.3174962 | 3.940940178 | 1.81E-08    | 26.2164589  |
| DONSON       | NM_017613    | 131.1989796 | 10.38232477 | 1.29E-09    | 12.6367632  |
| DPYD         | NM_001160301 | 45.65978809 | 0.318999502 | 4.53E-05    | 143.1343555 |
| NBPF11       | NM_183372    | 42.11386972 | 2.590719276 | 0.000953566 | 16.25566695 |
| NKD1         | NM_033119    | 90.8824255  | 6.579271489 | 2.86E-07    | 13.81344814 |
| DPP8         | NM_017743    | 86.89935644 | 3.978660957 | 6.90E-07    | 21.84135753 |
| VRK2         | NM_001288836 | 51.92603633 | 3.037641801 | 0.000186935 | 17.09419337 |
| SLC26A6      | NM_001281732 | 80.2446704  | 19.34565991 | 0.001759921 | 4.147941748 |
| MRPL30       | NR_028356    | 51.00302207 | 5.388033576 | 0.000608212 | 9.465980742 |
| KHDRBS1      | NR_073499    | 66.49814761 | 7.956231387 | 0.000202001 | 8.357995686 |
| CBFA2T2      | NM_001032999 | 55.86039251 | 3.83231638  | 6.03E-05    | 14.57614324 |
| PVR          | NM_001135768 | 125.9044585 | 12.58605794 | 1.83E-08    | 10.00348632 |
| USP33        | NM_015017    | 98.8485636  | 2.882921216 | 2.88E-09    | 34.28763958 |
| NIPA2        | NM_001008860 | 94.42834386 | 3.626840416 | 4.12E-08    | 26.03597981 |
| MLXIPL       | NM_032952    | 111.2836343 | 16.14404334 | 1.55E-06    | 6.893169942 |
| TSR3         | NM_001001410 | 136.9793643 | 29.96320905 | 6.82E-06    | 4.571585241 |
| PON2         | NM_000305    | 86.46220574 | 2.959735951 | 3.25E-08    | 29.21281059 |
| SKAP2        | NM_003930    | 73.15283366 | 2.564674093 | 1.50E-06    | 28.5232474  |
| TPD52        | NM_001025253 | 86.02505507 | 5.303375666 | 9.62E-07    | 16.22081114 |
| TSG101       | NM_006292    | 92.67974111 | 2.747661012 | 1.36E-08    | 33.73041314 |
| BCL2L11      | NM_001204108 | 136.5422136 | 9.59644029  | 6.55E-10    | 14.2284232  |
| TMEM25       | NM_001144037 | 64.74954487 | 11.47936534 | 0.000526619 | 5.640516087 |
| GTF2H2B      | NR_033417    | 43.47403467 | 2.609599628 | 0.000845902 | 16.65927379 |
| SMUG1        | NM_001243788 | 62.95222924 | 12.18385215 | 0.001952843 | 5.166857613 |
| PDE8A        | NM_001243137 | 67.42116185 | 3.900053922 | 5.31E-06    | 17.28723838 |
| LINC00854    | NR_047479    | 65.18669554 | 12.18508279 | 0.00105048  | 5.349712977 |
| MAPK13       | NM_002754    | 95.30264523 | 10.3800761  | 1.43E-06    | 9.181305059 |
| CCDC77       | NM_001130148 | 76.26160134 | 3.911350655 | 3.57E-06    | 19.49751072 |
| SLC9A6       | NM_001177651 | 31.47611462 | 0.88840868  | 0.001540453 | 35.42976936 |
| DTNB         | NM_183360    | 49.20570646 | 2.79867373  | 0.000376757 | 17.58179452 |
| SLC30A9      | NM_006345    | 82.4791367  | 1.578553398 | 1.22E-07    | 52.24982367 |
| MRPL52       | NM_181307    | 51.00302207 | 7.572420259 | 0.003455411 | 6.735366016 |
| HNRNPA2B1    | NM_031243    | 174.2358636 | 18.729      | 3.25E-11    | 9.302998753 |
| TGFBR1       | NM_004612    | 52.31447414 | 2.716816464 | 0.000143145 | 19.25579988 |
| CANX         | NM_001024649 | 98.89727652 | 7.286429394 | 1.58E-07    | 13.57280379 |
| KRCC1        | NM_016618    | 157.3805731 | 5.990520182 | 3.65E-13    | 26.27160386 |
| NFYC         | NM_014223    | 58.09485881 | 6.225567572 | 0.000297302 | 9.331656615 |
| MYO5A        | NM_000259    | 93.99119317 | 1.544808434 | 1.74E-08    | 60.84326776 |
| C1QTNF9B-AS1 | NM_001014442 | 70.04406598 | 14.83072824 | 0.001171321 | 4.722901321 |
| BCCIP        | NM_016567    | 105.5519625 | 9.923985776 | 2.60E-07    | 10.63604532 |
| SCN8A        | NM_014191    | 77.13590271 | 2.219287153 | 8.10E-07    | 34.75706269 |



|              |              |             |             |             |             |
|--------------|--------------|-------------|-------------|-------------|-------------|
| CENPJ        | NR_047594    | 59.40631088 | 2.635712311 | 1.78E-05    | 22.53899662 |
| NDUF6F6      | NM_152416    | 172.8756986 | 3.251799933 | 1.57E-16    | 53.16307957 |
| SCD          | NM_005063    | 78.93321834 | 14.70952067 | 0.000354055 | 5.366131237 |
| LOC81691     | NM_001199053 | 111.7207851 | 3.261395317 | 1.41E-10    | 34.25551772 |
| RALA         | NM_005402    | 65.18669554 | 1.683600652 | 5.82E-06    | 38.71862098 |
| ADSL         | NM_000026    | 126.8274728 | 7.825114957 | 3.53E-10    | 16.20774563 |
| RGS19        | NM_005873    | 69.1697646  | 9.821640337 | 0.000423261 | 7.042587819 |
| KRIT1        | NM_194455    | 60.76647581 | 4.426089385 | 0.00013586  | 13.72915694 |
| STX17        | NM_017919    | 127.2159105 | 3.616617177 | 6.35E-12    | 35.17538746 |
| STIP1        | NM_001282652 | 137.9023785 | 16.74661742 | 3.04E-08    | 8.234640767 |
| BCDIN3D-AS1  | NR_027499    | 44.34833603 | 4.035240169 | 0.00145691  | 10.99025936 |
| LYN          | NM_002350    | 108.6120173 | 2.826585237 | 8.18E-10    | 38.42516967 |
| PHKB         | NM_001031835 | 71.8413816  | 0.304465214 | 7.23E-08    | 235.9592439 |
| PCID2        | NM_018386    | 105.5032497 | 5.872457231 | 6.16E-09    | 17.96577574 |
| MASTL        | NM_001172303 | 57.65770813 | 5.16425234  | 0.000226818 | 11.16477359 |
| CD276        | NM_001024736 | 63.82653061 | 9.917735293 | 0.001056633 | 6.435595298 |
| RFWD3        | NM_018124    | 111.2836343 | 6.614658645 | 1.76E-08    | 16.82379096 |
| HIGD1A       | NM_001099669 | 54.98609113 | 5.196719944 | 0.000350461 | 10.58092253 |
| RNF146       | NM_001242852 | 66.98401118 | 5.099871162 | 2.87E-05    | 13.13445165 |
| NFKB1        | NM_001165412 | 116.1410048 | 3.077853364 | 1.22E-10    | 37.7344178  |
| PLOD2        | NM_000935    | 40.36526697 | 1.053042896 | 0.000230204 | 38.33202533 |
| FBXL4        | NR_103836    | 109.4863187 | 0.572945391 | 8.71E-13    | 191.0938117 |
| EMR2         | NM_001271052 | 69.60691528 | 5.112357832 | 2.32E-05    | 13.61542317 |
| COG6         | NM_001145079 | 54.54894044 | 1.525819465 | 8.93E-05    | 35.75058628 |
| NFE2L2       | NM_006164    | 93.55404248 | 10.40953035 | 2.81E-06    | 8.987345188 |
| YAP1         | NM_006106    | 55.42324183 | 3.871025487 | 0.000106807 | 14.31745722 |
| RHBG         | NM_020407    | 76.26160134 | 8.214759375 | 1.21E-05    | 9.283485719 |
| B3GALTL      | NM_194318    | 84.22773945 | 1.708541856 | 1.65E-07    | 49.2980252  |
| TMEM230      | NM_001009924 | 104.6289483 | 3.597473787 | 3.93E-10    | 29.08400574 |
| VPS13B       | NM_152564    | 173.3615622 | 2.304339508 | 2.13E-15    | 75.23264764 |
| CSRNP2       | NM_030809    | 132.9962952 | 10.85444267 | 5.91E-10    | 12.25270603 |
| NFAT5        | NM_173215    | 116.5781554 | 4.732462815 | 1.44E-09    | 24.63371821 |
| YWHAZ        | NM_001135699 | 75.82445064 | 18.02110741 | 0.001723413 | 4.207535582 |
| CHIC2        | NM_012110    | 50.5658714  | 2.955122092 | 0.000154628 | 17.11126303 |
| PSMG3-AS1    | NR_027329    | 150.7258871 | 13.33187757 | 3.74E-10    | 11.30567591 |
| NAA60        | NM_001083600 | 54.98609113 | 11.16269541 | 0.004901652 | 4.925879379 |
| LINC00673    | NR_036488    | 318.3070646 | 10.52108099 | 7.67E-26    | 30.25421675 |
| EXOSC3       | NM_016042    | 117.9383204 | 16.1506521  | 6.88E-07    | 7.302387524 |
| ARL13B       | NM_001174150 | 83.79058876 | 0.561332158 | 1.23E-09    | 149.2709575 |
| TMEM168      | NM_001287497 | 51.87732345 | 1.967282085 | 8.35E-05    | 26.37004822 |
| PARD3        | NM_001184787 | 88.64795919 | 2.442033897 | 9.24E-08    | 36.30087169 |
| RNF4         | NM_002938    | 123.2328415 | 8.929695217 | 2.13E-09    | 13.80034127 |
| TOMM40       | NM_006114    | 119.2497724 | 20.26740039 | 1.86E-06    | 5.883821807 |
| ANKEF1       | NM_198798    | 111.7207851 | 0.274807595 | 1.54E-15    | 406.5418386 |
| CHMP1A       | NM_002768    | 156.5062718 | 22.11804907 | 6.46E-09    | 7.075952822 |
| LOC100507564 | NR_038953    | 65.62384623 | 13.24794233 | 0.001753003 | 4.953512373 |
| CTDNEP1      | NM_015343    | 140.0881319 | 14.38114227 | 3.32E-09    | 9.741099092 |
| LTV1         | NM_032860    | 77.13590271 | 3.439934359 | 1.25E-06    | 22.42365541 |
| FGFR1        | NM_001174065 | 51.44017277 | 8.296366778 | 0.003085515 | 6.200325293 |
| ACAD8        | NM_014384    | 63.43809281 | 1.88813485  | 1.19E-06    | 33.598285   |
| INSIG1       | NM_005542    | 55.42324183 | 6.110298475 | 0.001040586 | 9.070463915 |
| SH3GLB2      | NM_020145    | 123.2328415 | 16.42373481 | 1.41E-07    | 7.503338483 |
| LOC102606465 | NR_109849    | 55.4719547  | 0.464273165 | 1.82E-06    | 119.4812857 |
| CAAP1        | NM_024828    | 93.11689181 | 1.651515844 | 3.72E-09    | 56.38268148 |
| CMPK2        | NM_001256478 | 52.31447414 | 1.990520475 | 7.68E-05    | 26.28180659 |
| ROR1         | NM_005012    | 58.09485881 | 2.276056571 | 6.29E-05    | 25.52434748 |
| TMEM143      | NM_018273    | 76.69875203 | 9.323156265 | 7.23E-05    | 8.22669382  |
| FOS          | NM_005252    | 188.4195371 | 32.81152862 | 5.36E-09    | 5.742479702 |
| TMEM254      | NR_072985    | 36.8193486  | 0.839279683 | 0.000677782 | 43.87017744 |
| TRIM7        | NM_203295    | 58.09485881 | 10.98283439 | 0.002206634 | 5.289605282 |
| LOC101929231 | NR_110240    | 80.68182108 | 0.73417482  | 2.41E-08    | 109.8945631 |
| GLB1L        | NM_001286423 | 125.9044585 | 13.66502782 | 2.00E-08    | 9.213626212 |

|           |              |             |             |             |             |
|-----------|--------------|-------------|-------------|-------------|-------------|
| UBE3D     | NM_198920    | 45.70850097 | 1.484925522 | 0.000602866 | 30.78167915 |
| CPNE1     | NM_152925    | 144.071201  | 12.88779815 | 1.04E-09    | 11.17888404 |
| TCEB2     | NM_007108    | 129.8875276 | 24.79801699 | 3.72E-06    | 5.23781912  |
| UBE3B     | NM_001270449 | 203.0403612 | 7.0334548   | 2.36E-18    | 28.86779926 |
| RNF7      | NM_183237    | 85.1507537  | 10.19367045 | 1.74E-05    | 8.353296693 |
| TOMM5     | NM_001001790 | 126.3416091 | 4.462639153 | 6.90E-12    | 28.31096237 |
| ZBED1     | NM_001171136 | 53.18877551 | 8.856380137 | 0.001357764 | 6.005701504 |
| CDK11B    | NM_033486    | 79.8075197  | 15.05794497 | 0.000179    | 5.300027319 |
| ABCC3     | NM_001144070 | 82.4791367  | 17.92921835 | 0.000677782 | 4.600263943 |
| SCP2      | NM_001193617 | 58.96916018 | 2.313295256 | 2.83E-05    | 25.49141102 |
| PAPOLA    | NM_001252007 | 133.4334458 | 3.852418053 | 4.66E-12    | 34.63628402 |
| DUS3L     | NM_001161619 | 129.0132262 | 20.68811485 | 4.07E-07    | 6.236103535 |
| SGSM1     | NM_001098497 | 76.69875203 | 3.960335345 | 8.04E-07    | 19.36673169 |
| LMBR1     | NM_022458    | 130.3246782 | 3.531480022 | 9.41E-12    | 36.90369969 |
| NCEH1     | NM_001146276 | 66.49814761 | 4.704754886 | 4.99E-05    | 14.13424275 |
| RUFY2     | NM_001278225 | 131.2476924 | 4.762453376 | 1.18E-11    | 27.55884039 |
| SUV39H2   | NM_001193427 | 101.0830299 | 2.632818207 | 5.06E-10    | 38.39347117 |
| C2orf43   | NM_001282720 | 77.13590271 | 1.290291226 | 5.08E-07    | 59.78177731 |
| GPN3      | NM_016301    | 42.59973328 | 4.500979831 | 0.003231011 | 9.464546584 |
| GULP1     | NR_045562    | 77.13590271 | 2.468022668 | 8.93E-07    | 31.25413057 |
| ZEB1      | NM_001174093 | 62.95222924 | 1.699728895 | 1.61E-05    | 37.03662944 |
| TRIM41    | NM_033549    | 153.8346547 | 26.68098627 | 1.09E-07    | 5.765703455 |
| CTTNBP2NL | NM_018704    | 69.60691528 | 0.95568979  | 1.21E-07    | 72.83421461 |
| CUL2      | NM_001198777 | 54.98609113 | 1.262811219 | 6.60E-05    | 43.54260583 |
| ZNF7      | NM_001282797 | 121.9213894 | 22.5757354  | 4.03E-06    | 5.400550072 |
| TAF9B     | NM_015975    | 52.75162482 | 3.697042843 | 0.000290766 | 14.26859981 |
| PHF2      | NM_005392    | 46.09693877 | 5.572176141 | 0.002829867 | 8.272699499 |
| MKLN1     | NM_013255    | 126.3416091 | 2.991061056 | 2.51E-11    | 42.23972923 |
| SLC22A5   | NM_003060    | 87.33650713 | 9.565248781 | 7.14E-06    | 9.130604873 |
| TSPAN3    | NM_001168412 | 75.38729997 | 4.980320923 | 4.96E-06    | 15.13703658 |
| RNF111    | NM_001270528 | 85.58790438 | 3.541976337 | 1.18E-07    | 24.16388373 |
| ARAF      | NM_001256197 | 80.68182108 | 4.055163145 | 2.15E-07    | 19.89607278 |
| MAP3K15   | NM_001001671 | 42.11386972 | 1.86670308  | 0.001129025 | 22.56056154 |
| C21orf67  | NR_027129    | 136.9793643 | 12.88562118 | 1.13E-09    | 10.63040441 |
| TARSL2    | NM_152334    | 120.1240738 | 2.076942754 | 1.98E-11    | 57.83696906 |
| C14orf178 | NM_174943    | 71.40423091 | 3.211933142 | 1.10E-06    | 22.23092068 |
| LPCAT1    | NM_024830    | 66.49814761 | 11.89289538 | 0.000727288 | 5.591417856 |
| DBT       | NM_001918    | 29.2903612  | 1.057619705 | 0.003281966 | 27.69460615 |
| METTL9    | NM_016025    | 51.87732345 | 3.399817236 | 0.000164774 | 15.25885654 |
| RABEP1    | NM_001291581 | 58.96916018 | 3.25773766  | 2.96E-05    | 18.10126117 |
| BMS1P6    | NR_024495    | 104.6289483 | 3.40614766  | 7.88E-10    | 30.71767836 |
| RPS10     | NM_001203245 | 106.4262639 | 16.53535135 | 5.23E-06    | 6.436286813 |
| RHOD      | NM_014578    | 119.6869232 | 15.14565594 | 1.71E-07    | 7.902392849 |
| PFKP      | NM_002627    | 87.33650713 | 7.838483886 | 2.48E-06    | 11.14201527 |
| LOC151484 | NR_038238    | 48.33140508 | 5.807223527 | 0.001143305 | 8.322635569 |
| ACPI      | NM_007099    | 77.57305339 | 5.049922226 | 1.18E-06    | 15.36123725 |
| GPR89A    | NM_001097613 | 109.049168  | 2.724231984 | 3.65E-10    | 40.02932521 |
| PPARD     | NM_001171818 | 100.2087285 | 8.629967389 | 2.81E-07    | 11.61171578 |
| ST3GAL4   | NM_001254757 | 52.31447414 | 5.470591248 | 0.0008683   | 9.562855597 |
| RNF166    | NM_178841    | 110.4093329 | 21.13919534 | 7.64E-06    | 5.222967628 |
| CBR3-AS1  | NR_038892    | 94.42834386 | 7.723835853 | 4.31E-07    | 12.22557621 |
| CMC1      | NM_182523    | 94.42834386 | 1.123780462 | 3.80E-09    | 84.0273942  |
| TNFRSF11A | NM_003839    | 61.64077717 | 4.238070011 | 8.13E-05    | 14.54453961 |
| SCN5A     | NM_001099405 | 105.9404003 | 5.722949729 | 1.50E-08    | 18.51150287 |
| PIP4K2B   | NM_003559    | 176.421617  | 12.7761275  | 9.92E-13    | 13.80869258 |
| GPN1      | NM_001145049 | 64.31239418 | 3.129628568 | 3.10E-06    | 20.54952937 |
| RBM27     | NM_018989    | 105.066099  | 2.40551171  | 8.94E-10    | 43.67723446 |
| RANBP6    | NM_001243202 | 94.42834386 | 1.64470421  | 9.47E-11    | 57.41357216 |
| RP9       | NM_203288    | 141.399584  | 1.60239831  | 8.90E-16    | 88.24246945 |
| MAD1L1    | NM_001013836 | 90.4452748  | 7.465164291 | 1.84E-06    | 12.11564425 |
| CENPO     | NM_001199803 | 93.99119317 | 8.528910679 | 5.36E-07    | 11.02030455 |
| PARP9     | NM_001146103 | 50.12872071 | 3.369214784 | 0.000138816 | 14.87845802 |

|              |              |             |             |             |             |
|--------------|--------------|-------------|-------------|-------------|-------------|
| SLC41A3      | NM_001008485 | 98.8485636  | 4.934326149 | 4.00E-08    | 20.03283946 |
| BTF3L4       | NM_001136497 | 47.01995303 | 4.142162445 | 0.002296056 | 11.35154733 |
| C12orf4      | NM_020374    | 80.2446704  | 2.284771893 | 1.77E-07    | 35.12152379 |
| ARL4C        | NM_001282431 | 59.40631088 | 11.5172957  | 0.004523481 | 5.158008654 |
| SLC30A6      | NM_001193513 | 71.8413816  | 1.925067997 | 1.29E-06    | 37.31888002 |
| CHTOP        | NM_001206612 | 136.9793643 | 12.32239217 | 2.74E-09    | 11.11629645 |
| FGFR1OP      | NM_194429    | 108.6120173 | 5.168556264 | 4.09E-09    | 21.01399536 |
| PCBP1-AS1    | NR_033872    | 160.0521901 | 6.594491194 | 2.63E-13    | 24.2705897  |
| LOC101927620 | NR_110062    | 168.4554789 | 2.347909792 | 6.83E-19    | 71.7469979  |
| BLMH         | NM_000386    | 75.82445064 | 5.562341042 | 3.89E-06    | 13.63175146 |
| POLR3D       | NM_001722    | 79.8075197  | 18.79528946 | 0.001307812 | 4.246144751 |
| CDK13        | NM_003718    | 69.60691528 | 1.859236583 | 4.24E-06    | 37.43843894 |
| SRA1         | NR_045587    | 101.0830299 | 22.14040834 | 0.000123342 | 4.565544968 |
| LHPP         | NM_001167880 | 134.7936109 | 12.34605564 | 2.15E-09    | 10.9179494  |
| ZMIZ2        | NM_001300959 | 99.28571429 | 20.610957   | 8.94E-05    | 4.817132669 |
| DDX19B       | NM_001014449 | 114.392402  | 5.76664625  | 1.03E-09    | 19.83690294 |
| RER1         | NM_007033    | 122.3585401 | 22.44427224 | 3.62E-06    | 5.451659951 |
| ENDOV        | NM_173627    | 141.4482969 | 24.42478647 | 1.61E-07    | 5.791178445 |
| UBE2E3       | NM_001278555 | 73.15283366 | 1.589767083 | 7.70E-07    | 46.01481214 |
| HMGB3        | NM_001301229 | 84.66489013 | 10.07547891 | 1.43E-05    | 8.403063607 |
| ANXA2        | NM_001002858 | 178.6560833 | 6.680697932 | 1.07E-14    | 26.74212861 |
| ANKHD1       | NM_017747    | 50.5658714  | 4.15383879  | 0.000200388 | 12.17328692 |
| MRPL39       | NM_017446    | 97.09996085 | 0.660102018 | 6.88E-12    | 147.0984155 |
| INF2         | NM_032714    | 95.30264523 | 19.58053062 | 7.94E-05    | 4.867214636 |
| SPDYC        | NM_001008778 | 83.79058876 | 19.41074049 | 0.000884739 | 4.316712636 |
| GRSF1        | NM_001098477 | 54.98609113 | 5.604625927 | 0.000377747 | 9.810840517 |
| CAMSAP2      | NM_001297707 | 55.42324183 | 2.610082725 | 9.96E-05    | 21.23428553 |
| LARP4        | NM_052879    | 58.09485881 | 5.09242994  | 0.00028782  | 11.40808209 |
| RFWD2        | NM_001286644 | 79.37036901 | 0.747685759 | 2.46E-08    | 106.1547155 |
| HERC2P2      | NR_002824    | 39.00510204 | 1.12250277  | 0.000238364 | 34.74833479 |
| SNHG17       | NR_027241    | 132.9962952 | 20.69503112 | 1.59E-07    | 6.426484427 |
| ZNF70        | NM_021916    | 70.04406598 | 9.646331357 | 0.000110917 | 7.261212931 |
| DNAJA3       | NM_001135110 | 113.9552513 | 10.96376689 | 5.10E-08    | 10.39380466 |
| ADAT3        | NM_138422    | 114.8295527 | 18.30208976 | 3.00E-06    | 6.274122476 |
| TBC1D9B      | NM_198868    | 123.6699922 | 10.42942127 | 1.18E-08    | 11.85780006 |
| PPT1         | NM_001142604 | 50.5658714  | 8.221154608 | 0.00270704  | 6.150701916 |
| ILF3         | NM_012218    | 172.8756986 | 15.05297807 | 1.10E-11    | 11.48448485 |
| MST4         | NM_001042453 | 51.00302207 | 2.015133762 | 0.000129178 | 25.30999333 |
| ZNF408       | NM_024741    | 154.2718054 | 21.07862626 | 1.32E-08    | 7.318873796 |
| MELK         | NM_001256690 | 148.05427   | 6.360728229 | 2.28E-12    | 23.27630811 |
| PSMA3        | NM_002788    | 61.2036265  | 11.13561738 | 0.001777115 | 5.496204156 |
| HEXA         | NM_000520    | 60.76647581 | 6.162815509 | 0.000134211 | 9.860180907 |
| NUAK1        | NM_014840    | 65.18669554 | 2.89077339  | 7.36E-06    | 22.54991546 |
| TTLL6        | NM_001130918 | 48.76855577 | 5.915067509 | 0.001539619 | 8.244801212 |
| TTC39B       | NM_001168340 | 47.8942544  | 0.494180023 | 2.25E-05    | 96.91661371 |
| COQ9         | NM_020312    | 155.6319704 | 5.60853444  | 5.49E-14    | 27.7491334  |
| DNAJC8       | NM_014280    | 116.1410048 | 5.067042202 | 4.13E-10    | 22.92086786 |
| KIAA1244     | NM_020340    | 77.13590271 | 2.63798699  | 8.06E-07    | 29.24044091 |
| CCDC126      | NM_138771    | 62.51507855 | 0.503269499 | 1.13E-07    | 124.2178967 |
| MYO5C        | NM_018728    | 134.3077472 | 5.596816272 | 4.03E-11    | 23.99716923 |
| TOMM70A      | NM_014820    | 43.47403467 | 2.663649232 | 0.00087665  | 16.32123109 |
| MARK3        | NM_001128921 | 119.735636  | 5.232367814 | 8.06E-10    | 22.88364279 |
| SSH2         | NM_001282130 | 113.0322371 | 2.775033801 | 3.45E-10    | 40.73184155 |
| C3orf58      | NM_173552    | 51.87732345 | 3.246757293 | 9.65E-05    | 15.97819571 |
| SPATA33      | NR_073515    | 135.6679122 | 21.37726127 | 4.12E-07    | 6.346365445 |
| SGPP1        | NM_030791    | 101.0830299 | 4.14942383  | 2.20E-08    | 24.36073875 |
| SNX2         | NM_003100    | 56.29754319 | 2.698141798 | 4.33E-05    | 20.8653019  |
| TSN          | NM_004622    | 47.01995303 | 2.221653751 | 0.000177638 | 21.16439297 |
| PDE5A        | NM_033437    | 37.69364998 | 1.667659133 | 0.003616464 | 22.60273051 |
| ZNF35        | NM_003420    | 84.22773945 | 7.047878036 | 2.15E-06    | 11.95079413 |
| ATP2A2       | NM_170665    | 133.4334458 | 8.423210482 | 2.66E-10    | 15.84116248 |
| ARF6         | NM_001663    | 125.4673077 | 18.37531627 | 6.56E-07    | 6.828035279 |

|               |              |             |             |             |             |
|---------------|--------------|-------------|-------------|-------------|-------------|
| BRMS1         | NM_015399    | 133.4334458 | 16.27811446 | 4.29E-08    | 8.197106991 |
| MRPS18A       | NM_018135    | 99.7715779  | 9.786983356 | 4.88E-07    | 10.19431364 |
| TCF12         | NM_207037    | 39.49096561 | 2.138258776 | 0.002221876 | 18.46874946 |
| ZFAND5        | NM_001278243 | 66.93529829 | 6.462475424 | 9.88E-05    | 10.35753235 |
| BTRC          | NM_003939    | 52.36318702 | 5.295070816 | 0.000977733 | 9.889043762 |
| SLC12A2       | NR_046207    | 102.8803456 | 2.79079578  | 2.38E-09    | 36.86416122 |
| TXLNG         | NM_018360    | 97.97426223 | 3.547801535 | 6.18E-09    | 27.61548561 |
| WDR35         | NM_001006657 | 48.33140508 | 2.355681157 | 0.000303459 | 20.51695534 |
| ZNF658B       | NR_003528    | 121.4842387 | 8.594462483 | 4.19E-09    | 14.13517587 |
| TOMM20        | NM_014765    | 92.19387756 | 3.032375757 | 2.86E-08    | 30.40318382 |
| RRNAD1        | NM_015997    | 208.3348823 | 18.8051773  | 4.42E-14    | 11.07859176 |
| ZNF652        | NM_001145365 | 129.8875276 | 4.601561216 | 8.40E-11    | 28.22683899 |
| GTPBP3        | NM_032620    | 113.9552513 | 21.16997193 | 1.41E-05    | 5.382872104 |
| RNF187        | NM_001010858 | 92.19387756 | 14.90612376 | 2.68E-05    | 6.184966597 |
| BNIP1         | NM_013980    | 42.11386972 | 3.958458595 | 0.003383191 | 10.63895673 |
| ALG5          | NM_001142364 | 115.7038541 | 3.614689563 | 8.92E-10    | 32.00934745 |
| HN1L          | NM_144570    | 86.46220574 | 10.35261637 | 1.25E-05    | 8.351725073 |
| MUM1          | NM_032853    | 116.5781554 | 11.19970393 | 2.29E-08    | 10.40903904 |
| KIAA1524      | NM_020890    | 64.74954487 | 3.325040846 | 5.52E-06    | 19.47330811 |
| TYW5          | NM_001039693 | 195.9485244 | 3.802117596 | 2.04E-19    | 51.53668172 |
| ARL8A         | NM_001256129 | 79.8075197  | 16.46663884 | 0.000302702 | 4.846618699 |
| ZNF33A        | NM_001278176 | 102.394482  | 0.625515349 | 1.53E-12    | 163.6961941 |
| COX5B         | NM_001862    | 113.4693878 | 16.84364462 | 2.63E-06    | 6.736629176 |
| RNF141        | NM_016422    | 105.066099  | 4.363498834 | 3.81E-09    | 24.07840657 |
| ACBD5         | NR_073196    | 68.73261391 | 2.517321236 | 2.56E-06    | 27.30387085 |
| SMG1P1        | NR_027154    | 141.4482969 | 0.944955686 | 2.28E-15    | 149.6877568 |
| RPS6KB1       | NM_001272044 | 132.1219938 | 6.270431215 | 4.87E-11    | 21.07063921 |
| ZFYVE26       | NM_015346    | 70.48121666 | 4.562406813 | 1.45E-05    | 15.44825342 |
| LMF1          | NM_022773    | 108.6120173 | 8.418284787 | 5.61E-08    | 12.90191768 |
| C2orf69       | NM_153689    | 100.2087285 | 4.688370365 | 6.04E-09    | 21.37389343 |
| IRF2BP2       | NM_001077397 | 52.31447414 | 9.385602722 | 0.004125773 | 5.573906726 |
| PMPCB         | NM_004279    | 70.04406598 | 2.555220011 | 3.67E-07    | 27.41214677 |
| NCOA3         | NM_001174087 | 50.12872071 | 2.795579777 | 0.000193876 | 17.931422   |
| ZUFSP         | NM_145062    | 58.09485881 | 5.021972892 | 0.000227361 | 11.56813469 |
| EPHX4         | NM_173567    | 73.58998434 | 1.041276836 | 1.14E-07    | 70.67283336 |
| CYP51A1       | NM_000786    | 65.18669554 | 6.039760126 | 3.27E-05    | 10.79292789 |
| WDR70         | NM_018034    | 54.54894044 | 1.312421322 | 1.24E-05    | 41.563589   |
| MEF2BNB-MEF2B | NR_027307    | 117.5011696 | 13.98611683 | 1.71E-07    | 8.401271852 |
| GTF3C5        | NM_001286709 | 85.58790438 | 13.73401597 | 5.10E-05    | 6.231819198 |
| FAM96A        | NM_001014812 | 44.34833603 | 2.232407745 | 0.000298138 | 19.86569709 |
| ZNF189        | NM_197977    | 83.79058876 | 2.489777748 | 5.13E-08    | 33.65384273 |
| REXO2         | NM_015523    | 55.86039251 | 3.592215624 | 7.59E-05    | 15.55040074 |
| STXBP5-AS1    | NR_034115    | 34.58488231 | 0.454306432 | 0.001031162 | 76.12677223 |
| RALGPS1       | NM_001190730 | 45.22263741 | 5.1791533   | 0.002952818 | 8.731666121 |
| CASP7         | NM_001267056 | 56.78340675 | 6.596334622 | 0.000279003 | 8.608327202 |
| SERBP1        | NM_001018067 | 60.76647581 | 7.314359604 | 0.000482813 | 8.307832689 |
| FIP1L1        | NM_030917    | 40.36526697 | 2.571044942 | 0.001973109 | 15.69994608 |
| FAM204A       | NM_022063    | 88.69667206 | 3.947738792 | 1.96E-07    | 22.4677155  |
| NADSYN1       | NM_018161    | 52.31447414 | 5.640424638 | 0.000842272 | 9.274917669 |
| NPTN          | NM_001161364 | 124.1071429 | 4.690226103 | 2.94E-10    | 26.4608017  |
| PBRM1         | NM_018313    | 211.44365   | 4.619015098 | 3.43E-18    | 45.77678261 |
| CLCN2         | NM_004366    | 120.5612245 | 14.25240066 | 1.64E-07    | 8.459011742 |
| FLVCR1-AS1    | NR_027286    | 86.89935644 | 9.203196612 | 2.29E-05    | 9.442301421 |
| RNF19B        | NM_001300826 | 148.05427   | 6.084617658 | 2.51E-12    | 24.33255109 |
| FAM111A       | NM_001142521 | 69.60691528 | 6.345580809 | 4.83E-05    | 10.96935291 |
| PIP4K2A       | NM_005028    | 101.9573313 | 3.939046348 | 3.81E-09    | 25.88376025 |
| ZNF655        | NM_024061    | 101.5201806 | 15.32739016 | 5.44E-06    | 6.623448579 |
| RBKS          | NM_022128    | 47.45710371 | 4.959230457 | 0.001630448 | 9.569449156 |
| TBC1D1        | NM_001253912 | 37.2564993  | 3.13109242  | 0.003971183 | 11.89888202 |
| PHYHIPL       | NM_032439    | 24.38427789 | 0.338683567 | 0.004651855 | 71.99722771 |
| CAV2          | NM_198212    | 86.02505507 | 7.186124214 | 3.06E-06    | 11.97099473 |
| PIGG          | NM_001289055 | 109.049168  | 2.93881697  | 5.45E-10    | 37.10648507 |

|              |              |             |             |             |             |
|--------------|--------------|-------------|-------------|-------------|-------------|
| DENND1B      | NM_001300858 | 74.46428571 | 0.929328054 | 9.65E-08    | 80.12701799 |
| ZNF195       | NR_040083    | 90.00812411 | 8.917983423 | 3.31E-06    | 10.09287861 |
| SLC26A5      | NM_206884    | 28.36734694 | 0.986388628 | 0.003549361 | 28.75879359 |
| TMEM147      | NM_032635    | 108.1748666 | 2.236268947 | 8.46E-11    | 48.37292348 |
| FIGNL1       | NM_001287494 | 65.18669554 | 3.662065395 | 3.23E-06    | 17.80052744 |
| ZFYVE28      | NM_001172656 | 62.95222924 | 9.595858105 | 0.000408533 | 6.560354327 |
| PLA2G12A     | NM_030821    | 68.29546324 | 5.883464214 | 1.57E-05    | 11.6080358  |
| VDAC2        | NR_033675    | 94.86549455 | 12.26383712 | 8.35E-06    | 7.735384415 |
| KANSL3       | NM_001115016 | 123.2328415 | 7.887488137 | 1.87E-09    | 15.62383858 |
| CEP78        | NM_001098802 | 93.11689181 | 2.282765332 | 2.50E-09    | 40.79126773 |
| SRM          | NM_003132    | 140.9624333 | 27.59772363 | 1.19E-06    | 5.107755814 |
| CAMK2D       | NM_172128    | 66.49814761 | 3.028199076 | 1.03E-05    | 21.95963539 |
| SSR1         | NR_120448    | 43.91118534 | 6.197459456 | 0.004341672 | 7.085352579 |
| EPS15L1      | NR_047666    | 91.75672686 | 8.862247914 | 1.62E-06    | 10.35366284 |
| NOD1         | NM_006092    | 118.375471  | 7.511063736 | 6.77E-09    | 15.76014732 |
| ZBED8        | NM_022090    | 165.7838619 | 7.866069736 | 9.83E-14    | 21.07581899 |
| RNF182       | NM_001165032 | 55.42324183 | 1.78968746  | 6.41E-05    | 30.96811206 |
| CDIPT        | NM_001286586 | 69.60691528 | 16.7478264  | 0.003395894 | 4.15617607  |
| ACTR10       | NM_018477    | 65.18669554 | 2.737009745 | 4.32E-06    | 23.81675683 |
| HAUS2        | NM_001130447 | 126.3416091 | 4.144653673 | 1.39E-11    | 30.48303166 |
| ANKFY1       | NM_001257999 | 112.1579357 | 6.278130651 | 4.73E-09    | 17.86486168 |
| GPATCH3      | NM_022078    | 78.05891695 | 12.62220873 | 0.000142898 | 6.184251793 |
| EI24         | NM_004879    | 140.5252827 | 7.336069793 | 3.55E-11    | 19.15539065 |
| CTBP2        | NM_001329    | 112.1579357 | 13.08934214 | 6.60E-07    | 8.568645733 |
| ITGA2        | NR_073103    | 47.01995303 | 3.051418287 | 0.000624499 | 15.40921257 |
| NFATC3       | NM_173163    | 111.2836343 | 3.166829518 | 5.00E-10    | 35.14039315 |
| LINC00339    | NR_023919    | 112.6437993 | 11.12912096 | 1.10E-07    | 10.12153608 |
| CPPED1       | NM_001099455 | 84.66489013 | 0.477504948 | 1.64E-09    | 177.3068333 |
| SNAPC2       | NM_003083    | 97.97426223 | 23.51316027 | 0.000390438 | 4.166784095 |
| PDE4DIP      | NM_001198832 | 44.00861116 | 3.425526829 | 0.001218725 | 12.84725339 |
| EIF1         | NM_005801    | 282.4107303 | 41.40514485 | 4.91E-14    | 6.820667608 |
| CTDSPL       | NM_005808    | 44.78548671 | 4.770729876 | 0.002832922 | 9.3875545   |
| USP21        | NM_001014443 | 104.6289483 | 10.23433312 | 1.13E-07    | 10.22332838 |
| GNA13        | NM_006572    | 165.3467113 | 7.694164662 | 2.56E-13    | 21.48988468 |
| FAM53B       | NM_014661    | 63.82653061 | 11.73553807 | 0.001272022 | 5.438739175 |
| SCARB1       | NM_005505    | 94.86549455 | 10.30478767 | 3.76E-06    | 9.205963051 |
| FGFR4        | NM_001291980 | 69.60691528 | 12.26031069 | 0.000779376 | 5.677418547 |
| SDCBP        | NM_001007069 | 105.5032497 | 1.660180568 | 4.96E-11    | 63.54926186 |
| CREBBP       | NM_004380    | 63.38937993 | 6.34898058  | 0.000102308 | 9.984182364 |
| FRMD5        | NM_001286491 | 136.1050629 | 4.539213476 | 3.49E-11    | 29.98428331 |
| SPRED2       | NM_181784    | 111.2836343 | 5.558366561 | 4.88E-09    | 20.02092397 |
| CEBPA-AS1    | NR_026887    | 109.049168  | 18.71903274 | 3.52E-05    | 5.825577075 |
| MINOS1-NBL1  | NM_001204089 | 83.35343807 | 8.656465021 | 7.66E-06    | 9.629038859 |
| HJURP        | NM_001282962 | 90.00812411 | 13.16821078 | 1.37E-05    | 6.835258458 |
| LOC100129361 | NM_001271592 | 175.1101649 | 3.367285778 | 3.64E-19    | 52.00335714 |
| TMEM217      | NR_104442    | 93.55404248 | 6.031567477 | 1.10E-07    | 15.51073462 |
| ZNF226       | NM_001146220 | 36.8193486  | 0.393553934 | 0.000176913 | 93.55604247 |
| LRCH4        | NM_002319    | 168.8926296 | 18.01881174 | 1.22E-10    | 9.37312804  |
| USP38        | NM_032557    | 81.11897176 | 3.938373312 | 1.55E-06    | 20.59707532 |
| PHYKPL       | NR_103509    | 129.4503768 | 20.70553534 | 6.58E-07    | 6.251969566 |
| STEAP2       | NM_152999    | 47.45710371 | 2.921554406 | 0.000206467 | 16.24378571 |
| CYFIP2       | NM_001291721 | 98.8485636  | 3.720743235 | 5.99E-09    | 26.5668866  |
| POGK         | NM_017542    | 63.38937993 | 9.427308354 | 0.000819873 | 6.724016819 |
| EEF1E1       | NM_004280    | 66.06099693 | 3.67865428  | 2.30E-05    | 17.9579248  |
| NUDT2        | NM_001244390 | 86.46220574 | 4.347211797 | 1.23E-07    | 19.88911739 |
| VPS29        | NM_001282151 | 99.7715779  | 5.451188342 | 1.76E-08    | 18.30272074 |
| VCL          | NM_014000    | 92.67974111 | 5.667105695 | 2.97E-07    | 16.3539814  |
| PPP1R15B     | NM_032833    | 132.1219938 | 7.448563478 | 4.54E-11    | 17.73791607 |
| ZNF707       | NM_001288808 | 109.9721823 | 12.14525649 | 2.40E-07    | 9.054743503 |
| SMC6         | NM_001142286 | 127.2159105 | 1.513362248 | 2.25E-12    | 84.06177085 |
| EML3         | NM_001300794 | 98.8485636  | 17.83235332 | 2.08E-05    | 5.543214729 |
| KANTR        | NR_110456    | 63.38937993 | 1.929394761 | 8.52E-06    | 32.85454133 |

|             |              |             |             |             |             |
|-------------|--------------|-------------|-------------|-------------|-------------|
| SYF2        | NM_207170    | 65.62384623 | 5.234032535 | 6.16E-05    | 12.53791332 |
| CACTIN      | NM_021231    | 147.1799686 | 18.01877213 | 2.94E-09    | 8.168146395 |
| PI4K2A      | NM_018425    | 97.53711154 | 5.584725918 | 4.49E-08    | 17.46497733 |
| COPS8       | NM_006710    | 34.14773161 | 2.851505668 | 0.004025039 | 11.97533359 |
| PPAP2A      | NM_176895    | 59.84346156 | 1.946264001 | 2.57E-05    | 30.74786439 |
| N6AMT2      | NM_174928    | 97.97426223 | 4.908899041 | 4.94E-08    | 19.95850015 |
| SVIL-AS1    | NR_110925    | 70.52992954 | 4.527847977 | 1.36E-05    | 15.57692085 |
| SF3A1       | NM_001005409 | 178.2189327 | 11.65288701 | 5.08E-13    | 15.29397243 |
| CYCS        | NM_018947    | 118.8126218 | 15.05695137 | 1.65E-07    | 7.890881685 |
| GGA1        | NM_013365    | 70.04406598 | 17.46535258 | 0.00176285  | 4.010458172 |
| CKLF-CMTM1  | NM_001204099 | 69.1697646  | 6.529443318 | 8.79E-05    | 10.59351636 |
| TPM3        | NM_001278189 | 122.3585401 | 7.753677593 | 1.09E-09    | 15.78071033 |
| ELMO2       | NM_182764    | 62.51507855 | 5.564084102 | 7.71E-05    | 11.23546615 |
| RDX         | NM_001260494 | 126.3416091 | 1.900426749 | 3.82E-12    | 66.48065187 |
| EIF1AX      | NM_001412    | 62.07792787 | 2.370985793 | 3.13E-06    | 26.18232807 |
| RASSF8      | NM_007211    | 56.29754319 | 2.1429289   | 5.12E-05    | 26.27130708 |
| TMEM177     | NM_001105199 | 66.06099693 | 14.35886632 | 0.003135226 | 4.600711189 |
| FAM222B     | NM_001288637 | 98.8485636  | 6.785458113 | 2.62E-07    | 14.5677067  |
| ECHDC1      | NM_001105545 | 73.15283366 | 3.373341677 | 9.79E-07    | 21.68556899 |
| GARS        | NM_002047    | 57.65770813 | 4.236526284 | 0.000227819 | 13.6096661  |
| PCLO        | NM_033026    | 46.58280234 | 0.813397193 | 8.22E-05    | 57.26944071 |
| CRLF3       | NR_073118    | 93.55404248 | 7.599966127 | 6.30E-07    | 12.3097973  |
| SLC44A2     | NM_020428    | 129.0132262 | 14.32007128 | 3.84E-08    | 9.009258657 |
| METTL4      | NM_022840    | 69.1697646  | 1.940787117 | 1.43E-06    | 35.64005757 |
| DKC1        | NM_001363    | 45.65978809 | 4.133340367 | 0.001641954 | 11.04670413 |
| QDPR        | NM_000320    | 87.77365781 | 3.391484849 | 1.16E-07    | 25.88059854 |
| COMMD3-BMI1 | NM_001204062 | 108.6120173 | 9.827124698 | 6.97E-08    | 11.05226815 |
| HMGB1       | NM_002128    | 155.5832575 | 14.89498988 | 3.95E-10    | 10.44534161 |
| TMEM63C     | NM_020431    | 52.31447414 | 9.169308419 | 0.00319277  | 5.705389299 |
| GMEB2       | NM_012384    | 105.9404003 | 12.89746112 | 1.34E-06    | 8.214050759 |
| SRP19       | NM_001204194 | 66.1097098  | 7.663312004 | 0.00022669  | 8.6267804   |
| LAMTOR2     | NM_001145264 | 58.09485881 | 4.801760297 | 0.000101124 | 12.09865866 |
| SERTAD2     | NM_014755    | 98.41141291 | 8.878988918 | 1.06E-06    | 11.08362831 |
| TMEM51      | NM_001136216 | 51.87732345 | 8.90318809  | 0.003155107 | 5.826825507 |
| PICK1       | NM_001039584 | 75.38729997 | 15.40739031 | 0.000982623 | 4.892931149 |
| CBX3        | NM_016587    | 166.2210125 | 8.460263049 | 3.13E-13    | 19.64726292 |
| DIS3L2      | NM_001257281 | 81.60483533 | 4.612490088 | 1.96E-06    | 17.69214324 |
| ARHGAP33    | NM_052948    | 66.06099693 | 14.48234308 | 0.003694898 | 4.561485429 |
| AARSD1      | NM_001261434 | 98.8485636  | 10.24765973 | 4.18E-07    | 9.645964658 |
| NEK7        | NM_133494    | 86.89935644 | 2.56254564  | 1.22E-07    | 33.91133999 |
| SLC35B3     | NR_109914    | 119.2497724 | 2.184140491 | 9.35E-13    | 54.59803201 |
| PBLD        | NM_001033083 | 86.89935644 | 4.147160587 | 5.46E-07    | 20.95394056 |
| NPEPL1      | NM_024663    | 52.75162482 | 7.176404696 | 0.002572788 | 7.350703738 |
| CLDND1      | NM_019895    | 93.55404248 | 13.60694521 | 1.14E-05    | 6.875462568 |
| SETD4       | NM_017438    | 101.5201806 | 4.206305797 | 5.69E-09    | 24.13523541 |
| SPECC1      | NM_001033555 | 72.71568297 | 2.573738771 | 2.62E-06    | 28.2529384  |
| FAM3A       | NM_001171134 | 72.71568297 | 8.425753415 | 0.000102981 | 8.630169837 |
| ZNF2        | NM_001017396 | 90.8824255  | 2.91186499  | 2.36E-08    | 31.21107119 |
| MICAL2      | NM_001282668 | 105.9404003 | 6.967144348 | 8.88E-08    | 15.20571342 |
| EEFSEC      | NM_021937    | 101.0830299 | 8.434394797 | 3.41E-07    | 11.98462158 |
| CARHSP1     | NM_001278260 | 157.8177238 | 21.84584837 | 8.05E-09    | 7.224151751 |
| HM13        | NM_178580    | 103.754647  | 10.37880687 | 6.47E-07    | 9.996779811 |
| CDK16       | NM_006201    | 62.51507855 | 11.50169557 | 0.002168368 | 5.435292402 |
| BRPF3       | NM_015695    | 148.05427   | 11.53143654 | 2.85E-10    | 12.83918699 |
| SLC33A1     | NM_004733    | 116.6268684 | 3.30408181  | 1.29E-10    | 35.29781497 |
| BCL7B       | NM_001707    | 165.7838619 | 8.632829558 | 4.01E-13    | 19.20388452 |
| CNOT1       | NR_049763    | 168.8926296 | 3.180540863 | 1.51E-15    | 53.10185809 |
| C14orf2     | NM_004894    | 111.7207851 | 7.852941277 | 9.62E-09    | 14.22661664 |
| BAMBI       | NM_012342    | 112.1579357 | 13.74229505 | 5.55E-07    | 8.161514162 |
| TSPAN13     | NM_014399    | 119.2497724 | 1.860635921 | 1.72E-12    | 64.09086866 |
| ACADSB      | NM_001609    | 152.086052  | 6.295822183 | 3.94E-12    | 24.15666255 |
| DCPIA       | NM_001290206 | 72.27853228 | 3.145204138 | 1.96E-06    | 22.9805536  |

|              |              |             |             |             |             |
|--------------|--------------|-------------|-------------|-------------|-------------|
| TYSND1       | NM_001040273 | 82.4791367  | 18.42199194 | 0.000426135 | 4.477210552 |
| CHN1         | NR_038133    | 39.05381491 | 1.451992223 | 0.002066095 | 26.8967108  |
| DNM3         | NM_001278252 | 91.75672686 | 1.739193188 | 3.86E-08    | 52.75821427 |
| PLK4         | NM_001190801 | 47.01995303 | 3.994968509 | 0.001776749 | 11.76979316 |
| STK16        | NR_026909    | 150.7258871 | 24.2259107  | 8.02E-08    | 6.22168095  |
| PPWD1        | NM_001278929 | 73.15283366 | 5.311974286 | 4.78E-06    | 13.77130794 |
| CAGE1        | NM_205864    | 57.65770813 | 4.335168275 | 0.000265447 | 13.2999931  |
| MED15        | NM_001293234 | 57.65770813 | 9.52927719  | 0.001133507 | 6.050585682 |
| SUPT5H       | NM_003169    | 90.4452748  | 10.03685495 | 4.57E-06    | 9.011316319 |
| METTL22      | NM_024109    | 89.57097344 | 6.539131117 | 1.25E-06    | 13.69768733 |
| SPC25        | NM_020675    | 61.64077717 | 3.124074726 | 5.38E-06    | 19.73089077 |
| ZNF627       | NM_001290084 | 125.0301571 | 8.205180242 | 2.30E-09    | 15.23795376 |
| DCLK2        | NR_036614    | 66.49814761 | 2.239399084 | 8.92E-06    | 29.69463911 |
| PRKAG2       | NM_024429    | 70.04406598 | 4.724023925 | 1.51E-05    | 14.8272039  |
| USB1         | NM_024598    | 60.76647581 | 6.871202551 | 0.00044866  | 8.84364496  |
| SPPL3        | NM_139015    | 120.1240738 | 3.692209151 | 8.71E-11    | 32.53447161 |
| SGOL1        | NM_001012409 | 65.18669554 | 1.440005109 | 6.25E-07    | 45.26837796 |
| CABLES1      | NM_001100619 | 63.82653061 | 3.97130763  | 1.72E-05    | 16.07191801 |
| MAEA         | NM_001297431 | 98.41141291 | 12.02865016 | 1.97E-06    | 8.181417832 |
| CDK5R1       | NM_003885    | 56.73469387 | 11.78554881 | 0.003415275 | 4.813920402 |
| SUMF1        | NM_001164675 | 95.30264523 | 0.008575543 | 3.86E-16    | 11113.30716 |
| TWF1         | NR_073473    | 143.6340504 | 1.786578861 | 2.81E-16    | 80.39614344 |
| PPIL6        | NM_001111298 | 64.31239418 | 1.668088622 | 3.82E-06    | 38.5545428  |
| TMPO         | NM_001032283 | 112.1579357 | 4.519570653 | 1.40E-09    | 24.81605982 |
| FAM136A      | NM_032822    | 132.1219938 | 20.60190321 | 2.30E-07    | 6.413096523 |
| RABL2A       | NM_007082    | 93.99119317 | 9.605880894 | 1.52E-06    | 9.784755215 |
| FOXN2        | NM_002158    | 77.13590271 | 2.31004004  | 4.41E-07    | 33.39158689 |
| IL6ST        | NM_001190981 | 91.36828904 | 1.692849181 | 9.81E-09    | 53.97308281 |
| OSCAR        | NM_130771    | 54.54894044 | 6.262901664 | 0.000770447 | 8.70985102  |
| TEAD2        | NM_001256660 | 113.0322371 | 14.75301784 | 7.04E-07    | 7.66163495  |
| KIAA1191     | NR_109798    | 89.57097344 | 9.466953019 | 4.84E-06    | 9.461436353 |
| UXS1         | NM_025076    | 129.8875276 | 4.033105926 | 1.01E-10    | 32.20533503 |
| SLC2A8       | NM_014580    | 80.2446704  | 14.72244742 | 0.000275251 | 5.450498013 |
| CHD8         | NM_020920    | 43.47403467 | 3.226398068 | 0.00102128  | 13.47447951 |
| IFNLR1       | NM_170743    | 73.15283366 | 6.758403585 | 3.11E-05    | 10.82398125 |
| AP3M2        | NM_001134296 | 47.8942544  | 6.120113544 | 0.001172783 | 7.825713371 |
| MKNK1        | NM_001135553 | 78.93321834 | 6.823165924 | 1.14E-05    | 11.56841549 |
| PSTPIP2      | NM_024430    | 52.31447414 | 2.360268818 | 0.000167736 | 22.16462538 |
| RFC2         | NM_181471    | 118.8126218 | 12.06344422 | 5.61E-08    | 9.848980075 |
| ACSF2        | NM_001288971 | 95.30264523 | 13.32346891 | 1.22E-05    | 7.152990399 |
| UQCR11       | NM_006830    | 86.46220574 | 19.05709086 | 0.000613369 | 4.537009682 |
| TK2          | NM_001272050 | 99.7715779  | 8.602520676 | 2.08E-07    | 11.59794689 |
| NEK4         | NM_001193533 | 125.9044585 | 5.374761407 | 1.50E-10    | 23.42512513 |
| TOR1B        | NM_014506    | 137.4165149 | 11.2044781  | 8.01E-10    | 12.264428   |
| GNG5         | NM_005274    | 64.74954487 | 10.39596152 | 0.000342369 | 6.228336334 |
| PYGB         | NM_002862    | 150.7258871 | 7.603637075 | 5.14E-12    | 19.82286708 |
| LOC100289495 | NR_040022    | 46.14565165 | 2.224258338 | 0.000115479 | 20.74653419 |
| CCNJ         | NM_019084    | 64.74954487 | 4.559806189 | 2.14E-05    | 14.20006513 |
| UBE3C        | NM_014671    | 87.33650713 | 6.02020567  | 5.52E-07    | 14.5072298  |
| MEPCE        | NM_001194991 | 179.0932339 | 33.98180038 | 1.72E-08    | 5.270269142 |
| ITPA         | NM_033453    | 54.54894044 | 10.36456904 | 0.004134611 | 5.26302061  |
| STX6         | NM_001286210 | 41.23956835 | 3.696332681 | 0.001930846 | 11.15688763 |
| RSRC1        | NM_016625    | 123.2328415 | 1.673325766 | 5.73E-11    | 73.64545742 |
| CCDC7        | NM_145023    | 78.93321834 | 1.619213969 | 2.95E-07    | 48.74786154 |
| P4HA3        | NM_001288748 | 48.33140508 | 3.070172973 | 0.000275251 | 15.74224173 |
| SENP8        | NM_145204    | 36.8193486  | 2.642126816 | 0.00259253  | 13.93549635 |
| C15orf40     | NM_001160113 | 90.00812411 | 10.36812225 | 3.40E-06    | 8.681236768 |
| PQLC2        | NM_017765    | 69.60691528 | 6.558360616 | 6.67E-05    | 10.61346263 |
| SEC13        | NM_001278946 | 93.99119317 | 20.58346569 | 0.000160512 | 4.566344393 |
| SUCO         | NM_014283    | 119.6869232 | 2.594519707 | 3.47E-11    | 46.13066644 |
| ADAM15       | NR_048577    | 97.97426223 | 17.10120879 | 3.70E-05    | 5.729084034 |
| C2CD3        | NM_001286577 | 41.23956835 | 4.156991773 | 0.002203096 | 9.920531625 |

|              |              |             |             |             |             |
|--------------|--------------|-------------|-------------|-------------|-------------|
| ZNF629       | NM_001080417 | 107.3005653 | 15.32169324 | 2.78E-06    | 7.003179319 |
| RAB5B        | NM_001252036 | 58.96916018 | 10.95499881 | 0.001701204 | 5.382854093 |
| RASIP1       | NM_017805    | 59.40631088 | 11.65930597 | 0.001675092 | 5.095184142 |
| TANGO2       | NM_001283148 | 109.049168  | 9.617958769 | 1.85E-07    | 11.33807814 |
| CTNNBIP1     | NM_001012329 | 63.38937993 | 10.98806498 | 0.001202055 | 5.768930201 |
| RPL17        | NM_001199345 | 140.0881319 | 27.73898203 | 1.69E-06    | 5.050226132 |
| LOC654342    | NR_027238    | 68.73261391 | 3.641530349 | 1.19E-05    | 18.87465085 |
| PEX1         | NM_001282677 | 58.96916018 | 3.117809196 | 2.01E-05    | 18.91365266 |
| MAP3K11      | NM_002419    | 113.9552513 | 18.25875842 | 2.11E-06    | 6.241128159 |
| PXMP4        | NM_183397    | 53.67463907 | 4.426868432 | 0.000284598 | 12.12474233 |
| SNX14        | NR_123729    | 55.42324183 | 3.167183435 | 9.70E-05    | 17.49922067 |
| UXT          | NM_004182    | 51.87732345 | 4.741990074 | 0.000273587 | 10.93998989 |
| PPP1R8       | NM_014110    | 82.4791367  | 4.955903416 | 5.48E-07    | 16.64260373 |
| NTMT1        | NM_001286798 | 122.8444037 | 16.94486118 | 2.21E-07    | 7.249655362 |
| PDCD10       | NM_145859    | 100.2087285 | 1.516031327 | 7.20E-10    | 66.09937851 |
| PTEN         | NM_000314    | 138.7766799 | 5.587351636 | 1.23E-11    | 24.8376492  |
| GNG10        | NM_001017998 | 93.11689181 | 10.78121214 | 3.01E-06    | 8.636959426 |
| LOC102724691 | NR_110603    | 102.8316327 | 0.325221661 | 1.92E-12    | 316.1893713 |
| DHX33        | NM_020162    | 73.15283366 | 6.791788852 | 2.86E-05    | 10.7707756  |
| NEDD1        | NM_152905    | 82.04198601 | 1.494000344 | 4.37E-08    | 54.91430195 |
| FAM72C       | NM_001287385 | 95.40007096 | 9.952233249 | 1.63E-06    | 9.585795325 |
| FAM134A      | NM_024293    | 105.066099  | 15.36889006 | 3.78E-06    | 6.836284115 |
| HIP1         | NM_001243198 | 58.5320095  | 6.203658746 | 0.000322817 | 9.435078861 |
| MAFB         | NM_005461    | 29.72751187 | 0.379468378 | 0.000894647 | 78.33989238 |
| TRMT10C      | NM_017819    | 79.37036901 | 6.863574451 | 3.04E-06    | 11.56399913 |
| MED25        | NM_030973    | 97.97426223 | 9.546905543 | 9.68E-07    | 10.26241035 |
| LIMCH1       | NM_001289122 | 59.40631088 | 0.978012766 | 3.10E-06    | 60.74185628 |
| STARD3NL     | NM_032016    | 54.11178977 | 0.46676771  | 1.42E-06    | 115.9287341 |
| METTL13      | NM_014955    | 46.58280234 | 3.693047526 | 0.001596596 | 12.61364822 |
| SF3B6        | NM_016047    | 54.54894044 | 7.489631773 | 0.000945404 | 7.283260659 |
| OTUD5        | NM_001136157 | 38.56795136 | 3.839112081 | 0.003328941 | 10.04606027 |
| STX1A        | NM_004603    | 116.5781554 | 23.29787883 | 1.28E-05    | 5.003809844 |
| ANAPC10      | NM_001256710 | 36.38219793 | 1.759306329 | 0.003516326 | 20.67985394 |
| MRVII        | NM_001206880 | 52.31447414 | 7.460536573 | 0.003239112 | 7.012159732 |
| POFUT2       | NR_004858    | 45.22263741 | 4.937748721 | 0.002167691 | 9.158553819 |
| STAT6        | NM_001178078 | 68.29546324 | 15.39283887 | 0.002481903 | 4.436833506 |
| PRKAR1A      | NM_212472    | 155.1948196 | 5.813202418 | 2.75E-13    | 26.6969578  |
| APIP         | NM_015957    | 79.8075197  | 3.527963162 | 1.24E-06    | 22.62141526 |
| CBX5         | NM_012117    | 90.4452748  | 8.790611694 | 1.29E-06    | 10.28884883 |
| PTER         | NM_030664    | 88.2108085  | 0.41007187  | 1.06E-10    | 215.1106061 |
| NDUFB8       | NM_001284368 | 128.1389248 | 22.53633945 | 1.35E-06    | 5.685880134 |
| LOC100289561 | NM_001242713 | 60.76647581 | 4.999608948 | 8.27E-05    | 12.15424575 |
| ZNF771       | NM_016643    | 84.22773945 | 17.10573485 | 0.000470179 | 4.923947447 |
| KHNYN        | NM_001290257 | 146.3056673 | 16.02288471 | 2.47E-09    | 9.131044124 |
| LOC101928103 | NR_110292    | 40.80241766 | 0.343790518 | 0.000171932 | 118.6839529 |
| GPR98        | NR_003149    | 53.23748838 | 0.976452664 | 1.27E-05    | 54.52132023 |
| LRSAM1       | NM_001005373 | 78.93321834 | 10.37325434 | 5.04E-05    | 7.60930136  |
| UBE2I        | NM_194259    | 127.6530613 | 24.39688897 | 1.67E-06    | 5.23234997  |
| CCT3         | NM_001008800 | 56.78340675 | 9.178760543 | 0.000977448 | 6.18639156  |
| HMGA2        | NM_001300918 | 97.97426223 | 5.408501204 | 9.30E-08    | 18.11486372 |
| DUT          | NM_001025248 | 105.5032497 | 5.880128904 | 6.74E-09    | 17.94233619 |
| C11orf80     | NM_024650    | 93.55404248 | 5.363799886 | 1.52E-07    | 17.44174736 |
| TOR2A        | NM_001252018 | 105.9404003 | 20.93661534 | 4.35E-05    | 5.060053815 |
| BRE          | NM_199194    | 74.46428571 | 3.790421252 | 1.80E-06    | 19.64538524 |
| USP43        | NM_153210    | 48.38011797 | 1.409640443 | 0.000259422 | 34.32089239 |
| GEMIN7       | NM_001007269 | 99.33442714 | 14.39514776 | 6.66E-06    | 6.900549325 |
| MPP2         | NM_001278376 | 54.98609113 | 7.655078063 | 0.00156084  | 7.18295629  |
| MORF4L1      | NM_001265603 | 59.40631088 | 4.792581051 | 0.000105154 | 12.39547339 |
| UST          | NM_005715    | 81.11897176 | 2.786315053 | 5.08E-07    | 29.1133523  |
| ANKRD49      | NM_017704    | 62.07792787 | 5.761287624 | 5.78E-05    | 10.77500932 |
| ACACA        | NM_198834    | 107.3005653 | 3.052674735 | 1.28E-09    | 35.14968825 |
| ZBTB48       | NM_005341    | 136.1050629 | 24.67220691 | 5.61E-07    | 5.516533781 |



|              |              |             |             |             |             |
|--------------|--------------|-------------|-------------|-------------|-------------|
| SEC11C       | NM_033280    | 70.04406598 | 3.121508903 | 3.91E-06    | 22.43916905 |
| CES3         | NM_001185177 | 55.42324183 | 10.1245382  | 0.004054886 | 5.474150103 |
| ZKSCAN8      | NM_001278122 | 54.98609113 | 5.065298979 | 0.000306977 | 10.85544829 |
| THEMIS2      | NM_001105556 | 79.37036901 | 17.0968587  | 0.000855323 | 4.642394863 |
| VDAC3        | NM_005662    | 64.31239418 | 4.225803429 | 1.59E-05    | 15.21897439 |
| TSFM         | NM_001172695 | 104.6289483 | 6.893048783 | 1.52E-08    | 15.17890727 |
| AMBRA1       | NM_001300731 | 61.64077717 | 4.627516071 | 0.000101733 | 13.32048905 |
| NUMB         | NM_001005744 | 70.96708023 | 1.973952037 | 2.52E-06    | 35.95177538 |
| LOC100128164 | NR_024409    | 66.06099693 | 1.153238363 | 1.65E-07    | 57.28303795 |
| KCTD14       | NM_023930    | 55.4719547  | 10.30746419 | 0.003135226 | 5.381726646 |
| CSDE1        | NM_001242893 | 126.7787599 | 5.773910399 | 1.04E-10    | 21.95717479 |
| PQLC3        | NM_152391    | 83.79058876 | 9.920726217 | 2.13E-05    | 8.446013621 |
| CTSC         | NM_001114173 | 29.72751187 | 0.663362828 | 0.001209537 | 44.81335191 |
| PPCS         | NM_001287509 | 183.5134537 | 11.84249382 | 1.17E-13    | 15.4961832  |
| SKP2         | NM_001243120 | 47.8942544  | 1.617722596 | 0.000158068 | 29.60597479 |
| SACM1L       | NM_014016    | 74.02713503 | 4.135689795 | 7.02E-06    | 17.89958597 |
| SPRYD4       | NM_207344    | 68.73261391 | 12.35445915 | 0.001167136 | 5.563385097 |
| SLC22A15     | NM_018420    | 88.64795919 | 1.710981302 | 3.42E-08    | 51.8111794  |
| ASXL1        | NM_001164603 | 83.35343807 | 10.28623556 | 1.55E-05    | 8.103395807 |
| ARFIP2       | NM_001242856 | 70.04406598 | 17.43812306 | 0.002600032 | 4.016720478 |
| LRRC20       | NM_018239    | 98.41141291 | 7.551020152 | 4.76E-07    | 13.03286323 |
| R3HCC1L      | NM_001256619 | 58.5320095  | 1.747411813 | 4.67E-05    | 33.49640254 |
| ZNF3         | NM_001278290 | 93.55404248 | 11.62696774 | 4.95E-06    | 8.046297588 |
| SH2B1        | NM_001145795 | 119.6869232 | 19.3396245  | 1.48E-06    | 6.188689092 |
| GABARAPL1    | NM_031412    | 48.76855577 | 4.909555319 | 0.000747829 | 9.933395715 |
| PPP1R12C     | NM_017607    | 102.394482  | 17.18789928 | 7.22E-06    | 5.957358739 |
| KIAA1958     | NM_133465    | 90.4452748  | 2.04235779  | 3.33E-08    | 44.28473564 |
| ZNF547       | NM_173631    | 40.80241766 | 3.357260971 | 0.001269639 | 12.15348405 |
| ACCS         | NM_032592    | 108.6120173 | 7.858300112 | 1.34E-08    | 13.82131196 |
| UCHL3        | NM_006002    | 128.5760755 | 1.494202264 | 6.53E-13    | 86.04998042 |
| CYP2S1       | NM_030622    | 94.91420746 | 13.55819154 | 6.85E-06    | 7.000506458 |
| MIR137HG     | NR_046105    | 27.05589488 | 0.405450796 | 0.004743706 | 66.73040267 |
| CDKN2B-AS1   | NR_047532    | 55.86039251 | 4.036750415 | 5.89E-05    | 13.83796043 |
| ELP6         | NM_001031703 | 80.2446704  | 10.38780273 | 3.33E-05    | 7.724893558 |
| PSIP1        | NM_021144    | 41.23956835 | 3.161731177 | 0.001768388 | 13.04335063 |
| SH3BP2       | NM_001145856 | 101.0830299 | 9.43780911  | 6.44E-07    | 10.71043382 |
| RPL21        | NM_000982    | 119.6869232 | 11.71304631 | 4.24E-08    | 10.21825749 |
| BAG1         | NM_001172415 | 71.40423091 | 7.571036142 | 3.09E-05    | 9.431236302 |
| NDUFA8       | NM_014222    | 65.62384623 | 0.799540387 | 1.12E-07    | 82.07696233 |
| ORAI2        | NM_001126340 | 67.37244898 | 12.44966566 | 0.001039591 | 5.41158701  |
| LETM2        | NM_001286821 | 45.65978809 | 5.125555458 | 0.001215779 | 8.908261449 |
| COPS7B       | NM_022730    | 106.8634146 | 5.719296851 | 2.31E-08    | 18.68471202 |
| POC1B-GALNT4 | NM_001199781 | 61.64077717 | 14.26230797 | 0.004507088 | 4.321935643 |
| ME2          | NM_001168335 | 74.07584791 | 4.781716611 | 8.19E-06    | 15.49147596 |
| ACOT9        | NM_001037171 | 56.29754319 | 2.258191163 | 3.10E-05    | 24.93037087 |
| BAZ2B        | NR_110586    | 81.11897176 | 2.624845069 | 5.08E-08    | 30.90428945 |
| FBXW8        | NM_153348    | 79.8075197  | 3.773579691 | 4.29E-07    | 21.14902195 |
| MSANTD2      | NM_001301087 | 43.91118534 | 4.050850117 | 0.00402291  | 10.83999261 |
| RUSC2        | NM_014806    | 71.8413816  | 5.949917297 | 1.58E-05    | 12.07434961 |
| QSOX2        | NM_181701    | 116.1410048 | 9.721934046 | 3.15E-08    | 11.94628602 |
| LDLRAD3      | NM_174902    | 76.26160134 | 1.444622625 | 7.71E-07    | 52.78998129 |
| INPP5J       | NM_001284285 | 80.2446704  | 12.35741973 | 9.11E-05    | 6.493642862 |
| CENPA        | NM_001042426 | 76.26160134 | 12.682979   | 0.000126735 | 6.012909217 |
| ENOPH1       | NM_021204    | 82.04198601 | 4.280095844 | 7.13E-07    | 19.16825908 |
| SIGMAR1      | NM_001282207 | 163.5981085 | 23.20968974 | 1.18E-08    | 7.048698638 |
| SLC39A1      | NM_001271957 | 111.2836343 | 19.69106672 | 5.88E-06    | 5.651478201 |
| FAM21C       | NM_001169106 | 61.2036265  | 0.685396141 | 7.51E-07    | 89.2967188  |
| P4HA1        | NM_001142595 | 97.09996085 | 3.865437724 | 9.30E-09    | 25.12004274 |
| ZNF621       | NM_001287245 | 90.8824255  | 11.13397958 | 1.06E-05    | 8.162618302 |
| RPL6         | NM_001024662 | 181.764851  | 18.24264895 | 9.00E-12    | 9.963731226 |
| CD47         | NM_198793    | 111.7207851 | 3.326532659 | 1.73E-10    | 33.58475522 |
| MRPL18       | NM_014161    | 58.5320095  | 7.86985717  | 0.000487095 | 7.43749324  |

|           |              |             |             |             |             |
|-----------|--------------|-------------|-------------|-------------|-------------|
| ZSWIM3    | NR_037628    | 44.34833603 | 3.902080415 | 0.001910541 | 11.36530551 |
| SEC11A    | NM_001271918 | 105.066099  | 4.592443546 | 7.44E-09    | 22.87803822 |
| CRYBB2P1  | NR_033733    | 111.7207851 | 6.796117181 | 3.19E-09    | 16.43891388 |
| ADD1      | NM_0011119   | 99.28571429 | 4.758360951 | 4.14E-08    | 20.86552813 |
| POLR3B    | NM_018082    | 90.4452748  | 2.455393878 | 3.37E-08    | 36.83534263 |
| YWHAG     | NM_012479    | 199.0572922 | 10.26592889 | 8.90E-16    | 19.3900907  |
| ZFAND4    | NR_104256    | 56.29754319 | 1.346884365 | 1.58E-05    | 41.79834933 |
| SMIM19    | NM_001135675 | 144.5083517 | 7.963277461 | 4.42E-12    | 18.14684374 |
| LCORL     | NM_001166139 | 80.68182108 | 1.518090956 | 3.00E-07    | 53.1468953  |
| ZSCAN26   | NM_152736    | 111.2836343 | 6.375425297 | 1.78E-09    | 17.45509187 |
| SLC39A9   | NM_018375    | 101.5201806 | 3.859607288 | 1.59E-08    | 26.30324098 |
| PTBP2     | NM_021190    | 66.06099693 | 2.672551495 | 7.72E-06    | 24.71832519 |
| RPP14     | NR_049758    | 122.7956908 | 8.175440395 | 1.88E-09    | 15.02007047 |
| ATXN3     | NM_001164780 | 93.55404248 | 2.94513451  | 7.87E-09    | 31.76562638 |
| ARHGEF2   | NM_001162383 | 71.8413816  | 10.89595194 | 0.000224575 | 6.593401106 |
| EMC3-AS1  | NR_103821    | 71.8413816  | 6.488944661 | 4.11E-05    | 11.07135064 |
| ACSL1     | NM_001995    | 62.51507855 | 3.618462987 | 1.45E-05    | 17.27669422 |
| DENND5B   | NM_144973    | 109.4863187 | 3.451221202 | 1.15E-09    | 31.72393547 |
| COG5      | NM_006348    | 47.8942544  | 2.014211418 | 0.000373377 | 23.77816646 |
| SEPT7P9   | NR_027269    | 36.38219793 | 1.153686716 | 0.001395184 | 31.53559578 |
| DUS4L     | NM_001270419 | 83.79058876 | 4.204414271 | 2.50E-07    | 19.92919426 |
| KRAS      | NM_004985    | 52.31447414 | 0.218118398 | 6.58E-07    | 239.8443896 |
| MYD88     | NM_001172568 | 74.02713503 | 11.88838385 | 0.000303072 | 6.226845968 |
| CXCL3     | NM_002090    | 48.33140508 | 3.829377859 | 0.000916846 | 12.621216   |
| ZCCHC10   | NM_001300818 | 82.91628738 | 2.402421046 | 4.47E-08    | 34.51363678 |
| GBX1      | NM_001098834 | 40.80241766 | 3.262877242 | 0.001365613 | 12.50504222 |
| FAM107B   | NM_001282697 | 45.65978809 | 4.359748532 | 0.002728388 | 10.47303251 |
| MRPL40    | NM_003776    | 114.8295527 | 6.50322433  | 1.75E-09    | 17.6573261  |
| BSCL2     | NM_001130702 | 130.3246782 | 13.20327378 | 1.59E-08    | 9.870633632 |
| GCH1      | NM_000161    | 123.7187051 | 4.594578318 | 2.38E-10    | 26.92710768 |
| MFS1      | NM_022736    | 51.00302207 | 1.835388923 | 7.68E-05    | 27.7886727  |
| IMPA1     | NM_005536    | 113.08095   | 2.10697607  | 9.62E-12    | 53.66978372 |
| EIF6      | NM_001267810 | 129.8875276 | 15.11307962 | 6.12E-08    | 8.594378564 |
| SLC23A2   | NM_005116    | 49.20570646 | 4.010368515 | 0.000367392 | 12.26962217 |
| ORC5      | NM_181747    | 104.6289483 | 1.538993683 | 9.40E-11    | 67.98530067 |
| CDK5RAP1  | NM_001278169 | 105.9404003 | 4.982964921 | 7.32E-09    | 21.26051498 |
| CRYBG3    | NM_153605    | 111.7207851 | 1.595687382 | 2.33E-10    | 70.014206   |
| CYB5R4    | NM_016230    | 84.71360301 | 0.708680614 | 1.73E-09    | 119.5370684 |
| COL13A1   | NM_080802    | 55.42324183 | 7.754071133 | 0.001970662 | 7.147631338 |
| KIF27     | NM_017576    | 91.75672686 | 0.761491565 | 3.17E-10    | 120.4960515 |
| OIP5      | NM_007280    | 111.2836343 | 5.207374119 | 9.07E-10    | 21.37039355 |
| RLIM      | NM_183353    | 54.98609113 | 1.835699508 | 4.36E-05    | 29.95375381 |
| ASH2L     | NM_001105214 | 50.12872071 | 7.052668731 | 0.002805055 | 7.107766241 |
| SCFD1     | NM_182835    | 86.89935644 | 2.376846786 | 9.85E-08    | 36.56077326 |
| ZNF774    | NM_001004309 | 57.65770813 | 6.676456536 | 0.000487095 | 8.63597446  |
| RTCA      | NM_001130841 | 82.4791367  | 2.238341031 | 3.33E-08    | 36.84833346 |
| SNX21     | NM_152897    | 89.13382275 | 11.22809599 | 1.21E-05    | 7.938462841 |
| ST7L      | NM_138728    | 86.89935644 | 1.945411247 | 7.56E-08    | 44.66888766 |
| CCDC63    | NM_001286243 | 43.91118534 | 5.200918174 | 0.004633868 | 8.442967928 |
| HIPK1-AS1 | NR_110726    | 65.18669554 | 2.99738011  | 1.61E-06    | 21.74789087 |
| ZNF341    | NM_001282933 | 69.1697646  | 7.39580817  | 0.000120511 | 9.352563372 |
| GK5       | NR_033289    | 101.0830299 | 3.13789035  | 3.36E-09    | 32.21369093 |
| PANK2     | NM_153640    | 75.82445064 | 6.220192514 | 3.60E-06    | 12.19004886 |
| DDX52     | NM_001291476 | 73.15283366 | 5.291263387 | 6.04E-06    | 13.82521117 |
| CHCHD4    | NM_001098502 | 70.48121666 | 7.813399983 | 3.31E-05    | 9.020556585 |
| PTPRG     | NM_002841    | 69.1697646  | 1.270954007 | 5.59E-07    | 54.42349937 |
| FGF18     | NM_003862    | 59.40631088 | 13.78259862 | 0.004927957 | 4.310240217 |
| MFF       | NM_001277064 | 79.8075197  | 2.831715418 | 1.36E-07    | 28.18345346 |
| VAV2      | NM_001134398 | 122.7956908 | 9.389950408 | 3.98E-09    | 13.07735244 |
| ZMAT1     | NM_001011657 | 56.73469387 | 1.92349432  | 3.25E-05    | 29.49563889 |
| ZFAT      | NM_020863    | 65.62384623 | 0.800289518 | 6.72E-07    | 82.00013212 |
| ESR2      | NM_001291712 | 119.6869232 | 3.839606022 | 7.63E-11    | 31.17166774 |

|           |              |             |             |             |             |
|-----------|--------------|-------------|-------------|-------------|-------------|
| ASNSD1    | NM_019048    | 98.41141291 | 0.871334663 | 7.76E-12    | 112.9433008 |
| C14orf166 | NM_016039    | 76.69875203 | 4.702366979 | 1.28E-06    | 16.31066915 |
| TM9SF2    | NM_004800    | 39.49096561 | 2.859276474 | 0.001916982 | 13.81152399 |
| GCDH      | NM_013976    | 92.67974111 | 13.49771126 | 2.44E-05    | 6.866330102 |
| DEK       | NM_003472    | 101.0830299 | 5.532506908 | 2.70E-08    | 18.27074626 |
| TRPM7     | NM_001301212 | 130.7618289 | 2.757546493 | 5.33E-12    | 47.41962802 |
| PMS2P4    | NR_046299    | 90.4452748  | 2.658905123 | 5.02E-09    | 34.01598425 |
| ANAPC1    | NM_022662    | 115.7038541 | 1.973143144 | 1.48E-10    | 58.63936152 |
| PDIK1L    | NM_001243533 | 88.69667206 | 7.196229706 | 7.25E-07    | 12.32543647 |
| MTMR12    | NM_001294344 | 82.4791367  | 3.188762849 | 1.84E-07    | 25.86555997 |
| SLC1A4    | NM_001193493 | 65.18669554 | 8.289263872 | 0.000190053 | 7.863990886 |
| ARRB2     | NM_001257331 | 77.13590271 | 17.96655218 | 0.001273924 | 4.293305803 |
| CLK4      | NM_020666    | 86.89935644 | 1.591539276 | 5.90E-09    | 54.60082434 |
| ISCA1     | NM_030940    | 71.8413816  | 5.701581049 | 7.41E-06    | 12.60025614 |
| OASL      | NM_003733    | 38.13080067 | 3.606296827 | 0.002726869 | 10.57339495 |
| LOC642846 | NR_024374    | 58.5320095  | 7.379713611 | 0.000933081 | 7.931474388 |
| ICA1      | NM_001276478 | 73.15283366 | 1.381669363 | 1.05E-06    | 52.94525274 |
| TMEM263   | NM_152261    | 55.4719547  | 4.353190756 | 0.000287103 | 12.74282654 |
| MPP3      | NM_001932    | 73.58998434 | 7.737435875 | 3.27E-05    | 9.510900707 |
| HELLS     | NM_001289074 | 115.7038541 | 5.031893774 | 1.52E-09    | 22.99409711 |
| SLC26A4   | NM_000441    | 28.8532105  | 0.927063355 | 0.003077731 | 31.12323481 |
| TBC1D13   | NM_018201    | 129.8875276 | 10.75833725 | 2.01E-09    | 12.07319724 |
| DBR1      | NM_016216    | 151.6001885 | 2.82629772  | 5.02E-16    | 53.63914333 |
| QPRT      | NM_014298    | 49.20570646 | 5.01166669  | 0.001093922 | 9.818232038 |
| FAM160A1  | NM_001109977 | 41.23956835 | 2.481632133 | 0.002198085 | 16.61792165 |
| CETN3     | NM_001297765 | 95.30264523 | 3.903178054 | 1.61E-08    | 24.4166789  |
| NMNAT1    | NM_022787    | 84.71360301 | 5.420682618 | 6.02E-07    | 15.62784782 |
| STRADA    | NM_001165969 | 113.9552513 | 11.27280611 | 6.08E-08    | 10.10886289 |
| METTL2B   | NM_018396    | 78.93321834 | 7.732752398 | 9.04E-06    | 10.20764849 |
| KIF1B     | NM_015074    | 80.68182108 | 3.232404323 | 4.56E-07    | 24.9603122  |
| CEP112    | NM_001199165 | 73.15283366 | 3.397197564 | 1.81E-06    | 21.53328803 |
| ZNF207    | NM_003457    | 82.91628738 | 5.862183438 | 3.20E-06    | 14.14426694 |
| SNX5      | NM_152227    | 56.34625608 | 10.12636763 | 0.002895318 | 5.56431073  |
| MAP3K4    | NM_001291958 | 73.15283366 | 1.76921385  | 1.10E-06    | 41.34764921 |
| C2orf68   | NM_001013649 | 93.99119317 | 15.69911656 | 3.51E-05    | 5.987037091 |
| YIPF4     | NM_032312    | 63.38937993 | 2.893216292 | 7.45E-06    | 21.90965815 |
| ALKBH5    | NM_017758    | 65.18669554 | 8.347506636 | 0.000173183 | 7.80912174  |
| GEMIN2    | NM_001009183 | 56.78340675 | 1.215018346 | 7.98E-06    | 46.73460854 |
| IMMP2L    | NM_001244606 | 48.33140508 | 0.621648894 | 4.61E-05    | 77.74711023 |
| SNX13     | NM_015132    | 90.4452748  | 1.864460375 | 2.85E-08    | 48.51016197 |
| FHL2      | NM_001450    | 48.76855577 | 3.403577343 | 0.000269925 | 14.32861688 |
| AREG      | NM_001657    | 239.3738462 | 22.44126142 | 2.77E-15    | 10.66668409 |
| TECR      | NM_138501    | 128.1389248 | 11.66203925 | 3.42E-09    | 10.98769452 |
| DCLRE1C   | NM_001033855 | 46.58280234 | 4.630273053 | 0.002551908 | 10.0604871  |
| KIAA0141  | NM_001142603 | 67.85831254 | 9.892262489 | 0.000306009 | 6.859736346 |
| DCAF6     | NM_001017977 | 91.31957618 | 3.331476421 | 3.72E-08    | 27.41114288 |
| DYNC1LI2  | NM_006141    | 109.4863187 | 8.602259004 | 2.86E-08    | 12.72762406 |
| ARNT      | NM_001286036 | 58.5320095  | 4.479555203 | 0.000271544 | 13.066478   |
| GDA       | NM_001242506 | 90.4452748  | 1.764918822 | 2.02E-08    | 51.24613874 |
| ATXN7L3B  | NM_001136262 | 131.1989796 | 16.17639468 | 3.36E-08    | 8.11052043  |
| PAK2      | NM_002577    | 126.3416091 | 2.430827441 | 1.08E-11    | 51.97473378 |
| RBM19     | NM_016196    | 52.31447414 | 4.654370977 | 0.000947536 | 11.23985913 |
| TMEM138   | NM_016464    | 101.5201806 | 10.28045256 | 3.26E-07    | 9.87506922  |
| NKIRAS2   | NM_001144928 | 143.6340504 | 26.67442015 | 6.92E-07    | 5.384711254 |
| NRF1      | NM_005011    | 91.31957618 | 6.456214015 | 3.18E-07    | 14.14444688 |
| ZNF160    | NM_198893    | 48.33140508 | 2.033470667 | 0.000204791 | 23.76793817 |
| DUOX1     | NM_017434    | 92.67974111 | 11.13570295 | 5.12E-06    | 8.322756228 |
| CEBPZ     | NM_005760    | 81.60483533 | 5.060517976 | 8.15E-07    | 16.12578707 |
| LINC00426 | NR_024464    | 41.67671904 | 5.942358843 | 0.004341672 | 7.013497525 |
| CAPRN2    | NR_038177    | 54.98609113 | 1.567233091 | 5.10E-05    | 35.08482014 |
| GTF2H3    | NM_001271868 | 87.33650713 | 4.038286668 | 1.70E-07    | 21.6271192  |
| U2AF1     | NM_006758    | 147.1799686 | 7.115286891 | 3.77E-12    | 20.68503644 |

|           |              |             |             |             |             |
|-----------|--------------|-------------|-------------|-------------|-------------|
| LEPRE1    | NM_022356    | 93.55404248 | 10.22775874 | 2.02E-06    | 9.147071697 |
| ISPD      | NM_001101426 | 55.42324183 | 1.697621314 | 0.000109303 | 32.64758835 |
| RBM6      | NM_005777    | 79.37036901 | 5.451366093 | 3.10E-06    | 14.55972093 |
| THAP5     | NM_001130475 | 82.91628738 | 5.777686389 | 6.84E-07    | 14.35112289 |
| TINCR     | NR_027064    | 48.33140508 | 7.652046278 | 0.003321486 | 6.316141242 |
| ZBTB6     | NM_006626    | 86.46220574 | 6.448943821 | 8.14E-07    | 13.40718855 |
| B4GALT5   | NM_004776    | 141.399584  | 6.660250601 | 7.83E-11    | 21.23036991 |
| PEX14     | NM_004565    | 136.9793643 | 4.199921162 | 2.41E-11    | 32.61474656 |
| HNRNPUL2  | NM_001079559 | 85.58790438 | 10.90727898 | 9.32E-06    | 7.846861217 |
| HTRA2     | NM_013247    | 141.0111462 | 19.60572545 | 4.01E-08    | 7.192345244 |
| TMTC4     | NM_001079669 | 73.58998434 | 4.431427607 | 7.98E-06    | 16.60638306 |
| RALGAPA1P | NR_104269    | 66.49814761 | 2.107856314 | 9.60E-06    | 31.54776119 |
| NF2       | NM_181831    | 89.13382275 | 5.440621038 | 4.63E-07    | 16.38302358 |
| LYSMD3    | NM_001286812 | 87.33650713 | 7.829502597 | 8.21E-07    | 11.15479637 |
| DDIT3     | NM_001195055 | 211.0064993 | 27.64482702 | 5.44E-12    | 7.632766129 |
| LIFR      | NM_001127671 | 74.46428571 | 1.204162612 | 5.79E-07    | 61.83906142 |
| ACSBG2    | NM_030924    | 44.78548671 | 4.462794069 | 0.002597545 | 10.03530211 |
| FAM178A   | NM_018121    | 125.4673077 | 7.039891437 | 1.08E-09    | 17.82233559 |
| TIMELESS  | NM_003920    | 105.1148118 | 8.700202518 | 5.53E-08    | 12.08188104 |
| POMP      | NM_015932    | 122.3585401 | 4.293564834 | 2.58E-11    | 28.49812331 |
| RPL7A     | NM_000972    | 189.2938384 | 47.24773983 | 7.42E-07    | 4.006410446 |
| ABLIM2    | NM_032432    | 69.60691528 | 8.048842834 | 0.000140594 | 8.64806491  |
| AKAP17A   | NM_005088    | 88.64795919 | 17.48849325 | 0.000171461 | 5.068930635 |
| ZNF485    | NM_145312    | 30.16466256 | 1.252695552 | 0.004314352 | 24.07980336 |
| ZNF460    | NM_006635    | 105.9404003 | 0.399403427 | 6.47E-15    | 265.2465982 |
| ARF1      | NM_001024226 | 121.0470881 | 18.68002528 | 7.46E-07    | 6.480028064 |
| CARD8     | NM_001184902 | 49.69157001 | 5.770604237 | 0.001500191 | 8.611155431 |
| FBXL18    | NM_024963    | 105.5519625 | 12.27321781 | 1.29E-06    | 8.600186532 |
| PLGRKT    | NM_018465    | 100.6458792 | 2.721239084 | 3.42E-09    | 36.98531297 |
| TADA2A    | NM_001291918 | 162.6750942 | 3.899128312 | 2.76E-14    | 41.72088765 |
| ARL2      | NM_001667    | 94.42834386 | 17.35104469 | 4.71E-05    | 5.442228152 |
| MYLK      | NM_053026    | 73.58998434 | 4.770314109 | 1.06E-05    | 15.42665381 |
| KAT8      | NM_032188    | 154.7089561 | 14.01711841 | 1.18E-10    | 11.03714413 |
| PECR      | NM_018441    | 79.37036901 | 3.187549371 | 2.11E-07    | 24.90012225 |
| PPA2      | NM_176867    | 104.1917976 | 3.045325615 | 2.53E-09    | 34.21368049 |
| NT5C2     | NM_012229    | 222.9557065 | 5.438540815 | 1.98E-19    | 40.9955012  |
| ADARB1    | NR_073200    | 85.10204081 | 5.551548016 | 9.94E-07    | 15.32942534 |
| SARAF     | NM_001284239 | 45.22263741 | 4.443423585 | 0.001956477 | 10.17743111 |
| NEDD4     | NM_006154    | 64.74954487 | 1.579103926 | 7.87E-06    | 41.00397941 |
| TMEM106C  | NM_001143843 | 82.4791367  | 7.153948366 | 2.19E-06    | 11.52917696 |
| DNAJB14   | NM_001278310 | 55.42324183 | 3.25617195  | 8.23E-05    | 17.02098129 |
| NFS1      | NR_037570    | 113.9552513 | 7.691565915 | 7.61E-09    | 14.81561136 |
| CXorf38   | NM_144970    | 41.67671904 | 2.407381467 | 0.000613192 | 17.31205445 |
| AMMECR1L  | NM_001199140 | 76.69875203 | 4.892806194 | 2.33E-06    | 15.67582058 |
| RBL1      | NM_002895    | 100.2087285 | 3.167426416 | 4.68E-09    | 31.6372712  |
| CDPF1     | NM_207327    | 153.3975041 | 18.82817765 | 1.78E-09    | 8.147230547 |
| MTUS1     | NM_001001925 | 62.95222924 | 3.279540024 | 1.73E-05    | 19.19544472 |
| CLK2      | NM_003993    | 162.6750942 | 17.24718867 | 2.69E-10    | 9.431977427 |
| C1orf216  | NM_152374    | 108.6120173 | 24.29252854 | 5.04E-05    | 4.471005031 |
| SERGEF    | NR_104040    | 58.96916018 | 2.302935461 | 3.22E-05    | 25.60608458 |
| KDM2A     | NM_012308    | 58.96916018 | 5.807230808 | 0.000177638 | 10.15443714 |
| ZNF592    | NM_014630    | 127.6530613 | 5.161086154 | 7.43E-11    | 24.73375903 |
| ALDH3A2   | NM_000382    | 61.64077717 | 2.064445516 | 5.28E-06    | 29.8582727  |
| ITPR1     | NM_001099952 | 70.04406598 | 2.107336796 | 2.98E-06    | 33.23819245 |
| MED14OS   | NM_001289773 | 48.33140508 | 7.654723861 | 0.004163894 | 6.313931888 |
| PCDHA5    | NM_018908    | 27.49304557 | 1.100255409 | 0.003978722 | 24.98787584 |
| AARS      | NM_001605    | 157.8177238 | 8.237104292 | 1.16E-12    | 19.15936938 |
| NCSTN     | NM_001290184 | 97.09996085 | 4.288196002 | 8.62E-09    | 22.6435454  |
| BCAS3     | NM_001099432 | 89.57097344 | 3.979999966 | 9.65E-08    | 22.5052699  |
| SAMM50    | NM_015380    | 61.64077717 | 4.540908546 | 7.16E-05    | 13.57454715 |
| VDAC1     | NM_003374    | 162.2379435 | 10.90797587 | 2.68E-12    | 14.87333171 |
| GCAT      | NM_014291    | 108.6120173 | 19.51385644 | 1.09E-05    | 5.565891994 |

|              |              |             |             |             |             |
|--------------|--------------|-------------|-------------|-------------|-------------|
| FLYWCH2      | NM_001142499 | 65.62384623 | 13.14647446 | 0.001577184 | 4.991744854 |
| STX16        | NR_037942    | 153.3975041 | 4.410000715 | 3.95E-14    | 34.7840089  |
| CKLF         | NM_001040138 | 69.1697646  | 7.800200681 | 6.44E-05    | 8.867690388 |
| EAF1         | NM_033083    | 60.76647581 | 2.550916976 | 6.21E-06    | 23.82142437 |
| ZNF397       | NM_032347    | 132.5591446 | 5.137233235 | 2.51E-11    | 25.80360644 |
| ZSCAN32      | NM_001284529 | 51.00302207 | 8.824487633 | 0.002581432 | 5.779714834 |
| DDX21        | NM_001256910 | 86.02505507 | 3.994509929 | 3.19E-07    | 21.53582206 |
| RRBP1        | NM_001042576 | 105.066099  | 9.589871483 | 3.90E-07    | 10.95594442 |
| CDIP1        | NM_001199056 | 56.73469387 | 10.48378718 | 0.002930135 | 5.411660207 |
| YBX1         | NM_004559    | 130.3246782 | 8.42183966  | 6.05E-10    | 15.47460928 |
| TTC9         | NM_015351    | 60.28061224 | 6.709918504 | 0.000537593 | 8.983806913 |
| B9D2         | NM_030578    | 67.85831254 | 10.91693869 | 0.000666507 | 6.215873742 |
| NUP50-AS1    | NR_038956    | 127.2159105 | 1.637651187 | 9.83E-14    | 77.68193343 |
| SPIB         | NM_001243999 | 66.93529829 | 9.297801908 | 0.0004161   | 7.199045425 |
| CXADR        | NM_001207065 | 71.8413816  | 2.272432625 | 1.46E-06    | 31.61430653 |
| PEX5         | NM_001131024 | 62.95222924 | 6.046926246 | 5.99E-05    | 10.41061635 |
| PGAP1        | NM_024989    | 80.2446704  | 1.456917592 | 2.10E-07    | 55.07838663 |
| GPATCH4      | NM_015590    | 76.26160134 | 17.67083698 | 0.001006558 | 4.315675677 |
| EML4         | NM_001145076 | 144.9455024 | 1.434777738 | 1.29E-13    | 101.0229658 |
| NME1-NME2    | NR_037149    | 138.3395291 | 23.71114239 | 3.72E-07    | 5.834367948 |
| MCMBP        | NM_024834    | 181.3277003 | 6.941233913 | 8.61E-15    | 26.12326607 |
| LOC652276    | NR_015441    | 121.9213894 | 13.34911577 | 4.04E-08    | 9.133293287 |
| DBF4B        | NR_036623    | 50.5658714  | 9.016011425 | 0.003010015 | 5.608452453 |
| RBPMS        | NM_001008711 | 39.9281163  | 3.578905896 | 0.002205485 | 11.15651472 |
| ABCB10       | NM_012089    | 119.2497724 | 3.861917076 | 2.11E-10    | 30.87838762 |
| ATP1A1-AS1   | NR_024125    | 62.51507855 | 10.60235221 | 0.000835257 | 5.896340484 |
| INO80        | NM_017553    | 133.8705966 | 3.919978226 | 4.16E-12    | 34.15085209 |
| LEPR         | NM_001003679 | 62.51507855 | 1.492973837 | 1.56E-05    | 41.87285606 |
| ATP6V1E1     | NM_001696    | 37.2564993  | 0.674788478 | 0.000208583 | 55.21211533 |
| ZBTB21       | NM_001098403 | 80.68182108 | 5.314704053 | 1.29E-06    | 15.18086807 |
| DGCR5        | NR_110533    | 77.57305339 | 4.799352912 | 4.23E-06    | 16.16323176 |
| SUPT4H1      | NR_073470    | 109.5350315 | 11.69189754 | 3.82E-07    | 9.368456334 |
| NKX3-1       | NM_006167    | 90.00812411 | 13.00512959 | 2.29E-05    | 6.920970952 |
| FAM86C1      | NM_018172    | 94.86549455 | 7.191577938 | 1.97E-07    | 13.19119328 |
| MAPK14       | NM_001315    | 58.5320095  | 5.154941461 | 0.000290877 | 11.35454397 |
| TYW3         | NM_138467    | 49.20570646 | 2.170977343 | 0.00020145  | 22.6652326  |
| SUCLA2       | NM_003850    | 66.49814761 | 1.464494789 | 3.86E-06    | 45.40688579 |
| EFCAB11      | NM_001284268 | 71.8413816  | 2.579840219 | 9.13E-07    | 27.84722134 |
| EP400        | NM_015409    | 101.0830299 | 7.276063433 | 3.00E-07    | 13.8925438  |
| LRIF1        | NM_018372    | 79.8075197  | 2.034503172 | 2.06E-08    | 39.22703134 |
| WDR91        | NM_014149    | 127.2159105 | 4.557473724 | 1.74E-11    | 27.9136904  |
| SRSF3        | NM_003017    | 180.4046861 | 13.88173831 | 8.50E-13    | 12.9958282  |
| SNRPD3       | NM_004175    | 138.3395291 | 11.2044128  | 1.26E-09    | 12.34687901 |
| MTMR2        | NM_201278    | 121.9213894 | 1.423042695 | 7.92E-12    | 85.67655058 |
| CLINT1       | NM_014666    | 76.69875203 | 1.462291191 | 3.20E-07    | 52.45107986 |
| ARL5A        | NM_001037174 | 142.759749  | 3.368530263 | 2.45E-13    | 42.38042642 |
| POGZ         | NM_145796    | 81.55612244 | 6.171697072 | 1.38E-06    | 13.21453751 |
| HMMR         | NM_012485    | 38.56795136 | 0.617060778 | 0.000159979 | 62.50267845 |
| KLHL36       | NM_024731    | 88.2108085  | 13.21512053 | 2.00E-05    | 6.674990841 |
| SLC9A7       | NM_001257291 | 70.48121666 | 1.866487836 | 2.36E-06    | 37.76141225 |
| KIF3B        | NM_004798    | 63.87524348 | 4.567571654 | 8.11E-05    | 13.98450825 |
| RBM14        | NM_001198836 | 174.6730143 | 22.01898129 | 2.43E-10    | 7.932838127 |
| PIGP         | NM_153681    | 87.33650713 | 7.106228974 | 1.10E-06    | 12.29013411 |
| COA6         | NM_001206641 | 67.85831254 | 6.766719267 | 4.50E-05    | 10.0282441  |
| FAM91A1      | NM_144963    | 88.69667206 | 3.069973946 | 3.04E-08    | 28.89166931 |
| SMIM12       | NM_138428    | 150.2887363 | 12.29485827 | 6.37E-11    | 12.22370629 |
| EIF2AK2      | NM_002759    | 127.6530613 | 3.667372215 | 3.98E-11    | 34.80777346 |
| AFTPH        | NM_017657    | 68.29546324 | 2.79755824  | 3.61E-06    | 24.41252599 |
| RMND5A       | NM_022780    | 62.51507855 | 3.481342809 | 1.32E-05    | 17.95717399 |
| SNRPB2       | NM_003092    | 76.26160134 | 1.786135228 | 1.45E-08    | 42.69643203 |
| DCTPP1       | NM_024096    | 61.64077717 | 10.70781518 | 0.001462456 | 5.756615715 |
| LOC101929089 | NR_120572    | 72.71568297 | 13.64960333 | 0.000486323 | 5.327311073 |

|            |              |             |             |             |             |
|------------|--------------|-------------|-------------|-------------|-------------|
| KIF14      | NM_014875    | 36.8193486  | 2.203821705 | 0.003410315 | 16.70704509 |
| RNF185     | NR_024212    | 82.91628738 | 5.716588915 | 1.22E-06    | 14.50450411 |
| CHPF2      | NM_019015    | 130.3246782 | 20.01945655 | 2.33E-07    | 6.509900898 |
| DHRS4-AS1  | NR_023923    | 107.3005653 | 6.018680538 | 6.45E-09    | 17.82792168 |
| PIK3R3     | NM_003629    | 37.2564993  | 3.200600453 | 0.003731724 | 11.64047179 |
| PTAR1      | NM_001099666 | 105.066099  | 1.079014781 | 6.71E-11    | 97.37225177 |
| RTN4       | NM_020532    | 73.15283366 | 3.851162155 | 1.27E-06    | 18.99500221 |
| ZNF251     | NM_138367    | 85.1507537  | 8.982793834 | 3.54E-06    | 9.479317378 |
| KIAA0556   | NM_015202    | 47.01995303 | 4.100588435 | 0.000685479 | 11.46663553 |
| MAP2       | NM_001039538 | 41.23956835 | 0.677920929 | 0.000284245 | 60.83241658 |
| ARHGEF1    | NM_004706    | 82.4791367  | 16.12897261 | 0.000245749 | 5.113725386 |
| SERINC2    | NM_178865    | 108.6120173 | 13.48237732 | 5.64E-07    | 8.055850592 |
| RPA3OS     | NR_034084    | 87.33650713 | 0.847432163 | 3.38E-09    | 103.0601751 |
| PIH1D2     | NM_001082619 | 99.33442714 | 6.584262258 | 2.47E-08    | 15.08664498 |
| MAPRE1     | NM_012325    | 141.399584  | 8.44541148  | 3.50E-11    | 16.74277024 |
| ECD        | NM_001135753 | 107.737716  | 5.0588028   | 2.96E-09    | 21.29707764 |
| REXO4      | NM_001279350 | 168.4554789 | 9.259784298 | 2.42E-13    | 18.19216015 |
| RAC1       | NM_006908    | 98.8485636  | 8.716779922 | 1.67E-07    | 11.34003204 |
| SIAE       | NM_170601    | 44.34833603 | 5.770827802 | 0.002530466 | 7.68491758  |
| HAUS6      | NM_001270890 | 43.03688397 | 3.559259542 | 0.001033778 | 12.09152731 |
| ARHGEF26   | NM_001251963 | 80.2446704  | 1.581955568 | 3.00E-07    | 50.7249837  |
| KIF24      | NM_194313    | 72.27853228 | 4.84396653  | 1.52E-05    | 14.92135254 |
| MPPE1      | NR_040243    | 100.2087285 | 5.934520204 | 9.97E-08    | 16.88573382 |
| PAFAH1B2   | NR_110269    | 122.7956908 | 7.456125095 | 1.32E-09    | 16.46910282 |
| ZNF789     | NM_213603    | 86.02505507 | 7.782847329 | 1.63E-06    | 11.05315978 |
| LRP5       | NM_001291902 | 59.84346156 | 9.628845527 | 0.000689169 | 6.215019381 |
| ETF1       | NM_004730    | 80.29338327 | 7.922219564 | 1.10E-05    | 10.13521307 |
| ORC4       | NM_181742    | 48.33140508 | 3.38221088  | 0.00033791  | 14.28988517 |
| FLVCR1     | NM_014053    | 76.26160134 | 3.157122018 | 3.88E-07    | 24.15541778 |
| PRKAR2B    | NM_002736    | 73.58998434 | 2.122375143 | 1.16E-06    | 34.67341039 |
| ODF2L      | NM_020729    | 54.11178977 | 1.740174741 | 5.63E-05    | 31.09560696 |
| HOMEZ      | NM_020834    | 78.93321834 | 8.583718699 | 2.11E-05    | 9.195690249 |
| LOC730183  | NM_001256932 | 160.4893408 | 17.94752476 | 8.42E-07    | 8.942143443 |
| PSMG3      | NM_001134340 | 236.2650786 | 29.07472926 | 2.29E-13    | 8.12613168  |
| GPATCH8    | NM_001002909 | 86.02505507 | 5.035100064 | 8.96E-07    | 17.08507358 |
| POPI       | NM_001145860 | 112.5950864 | 5.209689932 | 2.18E-09    | 21.61262721 |
| CCAR1      | NR_104262    | 60.76647581 | 4.057314495 | 0.000150181 | 14.97701889 |
| PAAF1      | NM_001267806 | 80.68182108 | 2.15195477  | 1.67E-07    | 37.49234055 |
| CHST15     | NM_001270764 | 109.049168  | 9.513129288 | 5.32E-08    | 11.46301755 |
| SLC25A3    | NM_002635    | 101.5201806 | 16.42837554 | 8.83E-06    | 6.179562937 |
| KCNC4      | NM_004978    | 84.22773945 | 13.65739009 | 8.10E-05    | 6.167191452 |
| KIF18B     | NM_001264573 | 121.9213894 | 16.04615466 | 1.52E-07    | 7.598168658 |
| KIAA0101   | NM_014736    | 74.51299858 | 6.433956628 | 1.85E-05    | 11.58120934 |
| LOC645166  | NR_027355    | 61.64077717 | 1.844378888 | 3.37E-06    | 33.42088633 |
| SDCBP2-AS1 | NR_040049    | 77.62176628 | 7.982130157 | 2.22E-05    | 9.724442568 |
| ST3GAL6    | NM_001271145 | 121.0470881 | 5.069737167 | 5.00E-10    | 23.87640307 |
| EIF4E      | NM_001130678 | 123.2328415 | 4.056100486 | 1.60E-10    | 30.38209776 |
| SLC25A17   | NR_104237    | 50.5658714  | 4.675347944 | 0.000815692 | 10.81542422 |
| FAM92A1    | NM_001283034 | 118.375471  | 9.423759315 | 2.36E-08    | 12.56138522 |
| ZNF124     | NM_001297569 | 90.8824255  | 8.076734757 | 5.77E-07    | 11.25237218 |
| GJC1       | NM_005497    | 118.8126218 | 6.355937204 | 1.84E-09    | 18.69317112 |
| ZSWIM7     | NM_001042698 | 93.55404248 | 1.64051825  | 5.03E-10    | 57.02712693 |
| DNMT3B     | NM_006892    | 130.7618289 | 7.54781599  | 3.17E-10    | 17.32445904 |
| MKL2       | NM_014048    | 132.9962952 | 2.045315716 | 3.26E-12    | 65.02482437 |
| DIP2C      | NM_014974    | 56.29754319 | 3.53791212  | 6.49E-05    | 15.91264601 |
| ERICH5     | NM_001170806 | 93.99119317 | 8.941140393 | 5.53E-07    | 10.51221534 |
| LOC441242  | NR_103527    | 86.89935644 | 5.436699718 | 5.34E-07    | 15.98384332 |
| PANX1      | NM_015368    | 88.69667206 | 3.997996677 | 3.07E-07    | 22.18527909 |
| EMC1       | NM_001271428 | 58.96916018 | 8.344148932 | 0.000578753 | 7.067126997 |
| FAM20C     | NM_020223    | 54.98609113 | 6.07141975  | 0.000540029 | 9.056545815 |
| P4HA2      | NM_001017974 | 65.18669554 | 8.950013008 | 0.000193854 | 7.283419084 |
| DNM1L      | NM_012062    | 57.22055744 | 2.894719528 | 4.66E-05    | 19.76721989 |

|             |              |             |             |             |             |
|-------------|--------------|-------------|-------------|-------------|-------------|
| CD164       | NM_001142403 | 61.64077717 | 6.445207168 | 0.000210296 | 9.563816269 |
| DPP3        | NM_005700    | 107.3005653 | 9.62447135  | 1.41E-07    | 11.14872302 |
| LINC00959   | NR_034125    | 70.48121666 | 1.776744658 | 9.48E-07    | 39.66873707 |
| SIRPA       | NM_001040023 | 47.8942544  | 6.229888618 | 0.00150296  | 7.687818729 |
| PRKRA       | NM_001139517 | 65.18669554 | 4.092502688 | 2.14E-05    | 15.92832076 |
| MESDC2      | NM_015154    | 104.6289483 | 9.14563472  | 1.07E-07    | 11.44031568 |
| HNRNPH1     | NM_001257293 | 181.3277003 | 17.53324684 | 5.68E-12    | 10.34193507 |
| C12orf45    | NM_152318    | 83.79058876 | 8.442885553 | 6.82E-06    | 9.924401821 |
| LOC146513   | NR_038438    | 34.58488231 | 1.064908428 | 0.000937232 | 32.47686037 |
| MIER1       | NM_001146110 | 111.7207851 | 4.171220123 | 2.66E-09    | 26.78371838 |
| UBR4        | NM_020765    | 118.8126218 | 5.277125004 | 8.67E-10    | 22.51464987 |
| G2E3        | NM_017769    | 43.47403467 | 2.350812782 | 0.000980023 | 18.49319308 |
| RAD51       | NM_002875    | 62.51507855 | 3.796580782 | 6.21E-05    | 16.46615261 |
| POLR3E      | NM_001258035 | 90.8824255  | 8.843967548 | 1.15E-06    | 10.27620522 |
| OSGEPL1-AS1 | NR_102429    | 68.73261391 | 7.724647886 | 8.11E-05    | 8.897831322 |
| EPAS1       | NM_001430    | 58.96916018 | 7.162186289 | 0.000653116 | 8.233402177 |
| TYW1        | NM_018264    | 81.55612244 | 2.172322435 | 2.43E-07    | 37.54328599 |
| ANAPC16     | NM_001242547 | 167.1440268 | 5.319430615 | 5.23E-15    | 31.42141309 |
| ZMYND19     | NM_138462    | 85.10204081 | 14.58286169 | 7.66E-05    | 5.83575725  |
| TECPR2      | NM_014844    | 97.97426223 | 7.393320615 | 5.39E-07    | 13.25172643 |
| TATDN3      | NM_001146171 | 90.8824255  | 5.213862074 | 1.03E-07    | 17.43092245 |
| FAM185A     | NR_026879    | 40.80241766 | 2.313796079 | 0.001819855 | 17.63440522 |
| MSH6        | NM_000179    | 120.1240738 | 7.066318765 | 1.42E-09    | 16.9995266  |
| S100PBP     | NM_001256121 | 51.00302207 | 6.159134852 | 0.000831272 | 8.280874391 |
| UNC119      | NM_005148    | 140.5252827 | 23.23463776 | 3.97E-07    | 6.048094408 |
| CCM2        | NM_031443    | 92.19387756 | 3.672714193 | 2.85E-08    | 25.10238279 |
| TMBIM4      | NM_001282606 | 127.2646234 | 7.971428448 | 4.14E-10    | 15.96509637 |
| KATNB1      | NM_005886    | 62.51507855 | 11.85394115 | 0.001013019 | 5.273780065 |
| CREM        | NM_181571    | 75.38729997 | 2.063103115 | 9.50E-07    | 36.54073296 |
| DERA        | NM_001300779 | 37.2564993  | 0.681265114 | 0.000441987 | 54.68722608 |
| BTBD8       | NM_183242    | 72.27853228 | 3.127737162 | 2.01E-06    | 23.10888944 |
| ZNF77       | NM_021217    | 64.31239418 | 11.41520081 | 0.001308801 | 5.633925784 |
| CSNK1G3     | NM_001270574 | 37.2564993  | 2.487033945 | 0.003686222 | 14.98029384 |
| KDM4E       | NM_001161630 | 30.60181325 | 0.342128799 | 0.001592987 | 89.44530043 |
| LIFR-AS1    | NR_103553    | 47.01995303 | 1.093270772 | 4.17E-05    | 43.00851559 |
| GRAMD2      | NM_001012642 | 116.1410048 | 9.112014942 | 2.93E-08    | 12.74591904 |
| RAD52       | NM_001297422 | 88.69667206 | 7.008063281 | 1.68E-06    | 12.65637431 |
| VPS11       | NM_021729    | 81.11897176 | 11.95630584 | 0.000101121 | 6.78461833  |
| CBLL1       | NM_024814    | 51.44017277 | 8.452425931 | 0.002507629 | 6.08584721  |
| TBCA        | NM_001297738 | 113.0322371 | 3.959756439 | 1.77E-09    | 28.5452499  |
| CTSS        | NM_004079    | 38.13080067 | 3.806237678 | 0.003328941 | 10.01797678 |
| GLMN        | NM_053274    | 132.5591446 | 0.906150169 | 3.90E-14    | 146.2882744 |
| TAB1        | NM_153497    | 78.93321834 | 9.177670342 | 1.17E-05    | 8.600572411 |
| POLD1       | NR_046402    | 101.5201806 | 13.57132764 | 2.19E-06    | 7.480489995 |
| UBAP1       | NM_001171202 | 95.30264523 | 4.643306815 | 1.24E-07    | 20.52473572 |
| NCOA4       | NM_001145261 | 106.377551  | 5.878511974 | 2.84E-08    | 18.09599972 |
| GUSBP4      | NR_125727    | 42.16258261 | 1.370179999 | 0.000289277 | 30.77156478 |
| TRIAP1      | NM_016399    | 89.13382275 | 8.109343567 | 3.69E-06    | 10.99149666 |
| BMS1P5      | NR_003611    | 65.62384623 | 2.433293413 | 2.68E-06    | 26.96914638 |
| AIG1        | NM_001286589 | 56.73469387 | 2.717376829 | 5.52E-05    | 20.87847856 |
| KIAA0895    | NM_001199706 | 62.07792787 | 0.056096937 | 3.09E-10    | 1106.618848 |
| FAN1        | NM_001146095 | 87.77365781 | 0.454269276 | 6.85E-13    | 193.2194457 |
| RNF207      | NM_207396    | 76.69875203 | 15.53076452 | 0.000560534 | 4.938504601 |
| TIGD6       | NM_030953    | 58.5320095  | 10.64765147 | 0.001900453 | 5.497175568 |
| GTF3C6      | NM_138408    | 64.31239418 | 9.114461754 | 0.000339273 | 7.056082511 |
| BTG2        | NM_006763    | 234.9536265 | 27.47258449 | 1.42E-13    | 8.552294256 |
| DES12       | NR_123735    | 107.3005653 | 1.54335878  | 1.07E-10    | 69.52405796 |
| PEMT        | NM_001267551 | 76.26160134 | 9.38250517  | 2.55E-05    | 8.128063876 |
| MBOAT1      | NM_001080480 | 51.00302207 | 1.148336679 | 1.64E-05    | 44.41469387 |
| MEF2A       | NM_005587    | 94.86549455 | 3.691125284 | 2.17E-08    | 25.70096847 |
| AGTPBP1     | NM_001286717 | 41.67671904 | 1.724447751 | 0.001151422 | 24.16815413 |
| PEA15       | NM_001297577 | 76.26160134 | 18.5361494  | 0.001241271 | 4.114209466 |

|          |              |             |             |             |             |
|----------|--------------|-------------|-------------|-------------|-------------|
| RPL5     | NM_000969    | 171.1270958 | 18.74778784 | 4.60E-11    | 9.127855364 |
| PPP6R2   | NM_014678    | 93.99119317 | 9.58976204  | 9.27E-07    | 9.801201821 |
| ALDH5A1  | NM_170740    | 36.8193486  | 2.583577539 | 0.003161081 | 14.25130388 |
| CCDC66   | NR_024460    | 62.95222924 | 1.527040521 | 8.65E-06    | 41.22498938 |
| PPA1     | NM_021129    | 75.38729997 | 5.621985933 | 5.89E-06    | 13.40937186 |
| TTC4     | NM_001291333 | 159.1291758 | 2.873831991 | 1.39E-15    | 55.3717741  |
| ARAP3    | NM_022481    | 65.18669554 | 11.79147714 | 0.000643209 | 5.528289183 |
| YTHDC1   | NM_133370    | 66.49814761 | 4.387021423 | 3.79E-05    | 15.15792635 |
| EZH2     | NM_152998    | 116.1410048 | 4.812098652 | 1.05E-09    | 24.1352086  |
| ANXA7    | NM_004034    | 136.1050629 | 4.075653393 | 3.84E-12    | 33.39466086 |
| FAM49B   | NM_001256763 | 106.8634146 | 4.785338598 | 1.37E-08    | 22.33142179 |
| APLP1    | NM_001024807 | 90.8824255  | 12.96026534 | 9.42E-06    | 7.012389264 |
| GNAS     | NM_001077489 | 84.66489013 | 9.924271367 | 1.08E-05    | 8.531093821 |
| LBX2     | NM_001009812 | 144.071201  | 31.00623501 | 2.33E-06    | 4.646523544 |
| TCP1     | NM_030752    | 83.79058876 | 11.71444248 | 4.82E-05    | 7.152759418 |
| MAPKAP1  | NM_001006620 | 150.2887363 | 3.967803017 | 1.85E-13    | 37.87706589 |
| HBEGF    | NM_001945    | 204.3518133 | 9.432717306 | 5.55E-17    | 21.66415113 |
| WDR31    | NM_001012361 | 82.4791367  | 5.941948111 | 7.92E-07    | 13.88082413 |
| NMRK1    | NM_017881    | 73.15283366 | 1.916072363 | 2.33E-07    | 38.1785339  |
| PRKG2    | NM_001282480 | 30.60181325 | 0.512987348 | 0.00122925  | 59.65412867 |
| ODC1     | NM_001287189 | 65.18669554 | 7.341413305 | 0.000221929 | 8.879311494 |
| TMEM14B  | NM_030969    | 80.68182108 | 7.035230015 | 2.81E-06    | 11.46825632 |
| STAG3L4  | NR_040586    | 94.42834386 | 5.698155217 | 2.25E-07    | 16.5717395  |
| PIK3R1   | NM_181523    | 132.5591446 | 2.727865218 | 3.17E-12    | 48.5944627  |
| FOXJ3    | NM_001198851 | 96.66281017 | 3.777505347 | 1.22E-08    | 25.58905979 |
| CEP152   | NM_001194998 | 32.83627956 | 0.494172874 | 0.001268755 | 66.44694863 |
| AGPAT5   | NM_018361    | 53.67463907 | 4.496823702 | 0.000459674 | 11.93612261 |
| H3F3AP4  | NR_002315    | 148.9285714 | 7.508914039 | 8.54E-13    | 19.8335699  |
| ZNF616   | NM_178523    | 30.60181325 | 0.576015304 | 0.000676243 | 53.12673643 |
| WDR48    | NM_020839    | 66.06099693 | 3.665337712 | 6.30E-06    | 18.02316788 |
| ADIPOR2  | NM_024551    | 176.8587677 | 2.950569495 | 1.43E-16    | 59.94055317 |
| MON1A    | NM_001142501 | 70.48121666 | 15.1560059  | 0.001651265 | 4.650381976 |
| SPECC1L  | NM_001254732 | 141.399584  | 5.273834537 | 1.48E-11    | 26.8115321  |
| FNTA     | NR_033698    | 104.6289483 | 2.48818172  | 1.50E-10    | 42.05036451 |
| CSNK1A1  | NM_001892    | 62.95222924 | 6.443842782 | 8.82E-05    | 9.769361446 |
| SUPT3H   | NM_003599    | 57.22055744 | 1.505455248 | 6.23E-05    | 38.00880665 |
| TEX2     | NM_018469    | 143.6340504 | 10.54456994 | 3.71E-10    | 13.62161294 |
| AFG3L1P  | NR_003227    | 217.6611853 | 16.50839603 | 6.25E-15    | 13.18487786 |
| ATG4D    | NM_032885    | 154.7089561 | 17.99764935 | 1.32E-09    | 8.596064582 |
| EHHADH   | NM_001166415 | 86.02505507 | 3.474850135 | 8.61E-08    | 24.75647919 |
| TMEM184B | NM_012264    | 97.53711154 | 12.95679499 | 7.39E-06    | 7.527873336 |
| NRP1     | NR_045259    | 38.13080067 | 2.521850223 | 0.003828701 | 15.12016864 |
| SMAD6    | NR_027654    | 115.7038541 | 11.9879323  | 8.47E-08    | 9.651693992 |
| MIPOL1   | NM_001195297 | 40.80241766 | 0.486747389 | 0.000272773 | 83.82668    |
| POLR3F   | NM_001282526 | 64.31239418 | 3.726261832 | 1.71E-05    | 17.25922575 |
| GMNN     | NM_001251990 | 143.6340504 | 8.954272176 | 6.43E-11    | 16.04084034 |
| SURF4    | NM_033161    | 100.6458792 | 16.39118854 | 8.57E-06    | 6.140242911 |
| ATP5J    | NM_001003697 | 72.71568297 | 2.406220324 | 9.38E-07    | 30.21987731 |
| SSU72    | NM_014188    | 104.1917976 | 18.86910209 | 2.34E-05    | 5.521820652 |
| NDRG1    | NM_001135242 | 93.60275532 | 5.162105556 | 1.18E-07    | 18.13266976 |
| CCDC93   | NM_019044    | 71.8413816  | 1.642365994 | 1.72E-06    | 43.74261392 |
| TTC14    | NM_133462    | 66.49814761 | 8.017850547 | 0.000298002 | 8.293762427 |
| UBE2H    | NM_003344    | 78.05891695 | 5.844518556 | 5.52E-06    | 13.35591909 |
| TMEM120B | NM_001080825 | 62.51507855 | 11.19643797 | 0.001217478 | 5.583479202 |
| TMED3    | NM_007364    | 54.11178977 | 9.510859455 | 0.003729155 | 5.689474229 |
| SLC9B1   | NR_047515    | 45.65978809 | 2.54391438  | 0.000629865 | 17.94863398 |
| MARVELD3 | NM_052858    | 84.22773945 | 7.677710328 | 7.81E-06    | 10.97042424 |
| LAMB1    | NM_002291    | 58.96916018 | 4.79868321  | 0.00016004  | 12.28861286 |
| METTL25  | NM_032230    | 54.98609113 | 0.817063358 | 7.05E-06    | 67.29721827 |
| MBIP     | NM_016586    | 45.65978809 | 2.932245732 | 0.000367702 | 15.57161038 |
| DCAF5    | NM_001284206 | 73.15283366 | 4.964471699 | 9.17E-06    | 14.73527056 |
| ADAM22   | NM_021722    | 122.3585401 | 1.205533791 | 2.11E-12    | 101.4973956 |



|            |              |             |             |             |             |
|------------|--------------|-------------|-------------|-------------|-------------|
| DYRK4      | NM_001282285 | 33.71058093 | 1.126322067 | 0.001415238 | 29.9297882  |
| CAPZA2     | NM_006136    | 136.9793643 | 4.361581938 | 8.77E-12    | 31.40589039 |
| ASB13      | NM_024701    | 69.60691528 | 7.23097859  | 9.38E-05    | 9.626209568 |
| ASAP1      | NM_018482    | 55.42324183 | 4.579730159 | 0.000573333 | 12.10185751 |
| ZNF266     | NM_006631    | 38.13080067 | 2.776517339 | 0.002663337 | 13.73331985 |
| CDC5L      | NM_001253    | 51.44017277 | 3.497473446 | 0.000169825 | 14.70780939 |
| CDK5RAP2   | NR_073556    | 38.13080067 | 2.211963733 | 0.003845963 | 17.23843845 |
| PPHLN1     | NM_201438    | 72.71568297 | 2.131347954 | 1.68E-06    | 34.11722747 |
| SERPINB8   | NM_001276490 | 82.91628738 | 4.427723163 | 4.25E-07    | 18.72661961 |
| HNRNPDL    | NM_001207000 | 136.1050629 | 23.01524488 | 3.86E-07    | 5.91369171  |
| TXNDC5     | NM_030810    | 117.0153061 | 7.745327957 | 3.98E-09    | 15.10785686 |
| THOC5      | NM_003678    | 97.09996085 | 4.917147428 | 5.02E-08    | 19.74721366 |
| DSTN       | NM_006870    | 54.11178977 | 3.889941075 | 0.000395715 | 13.91069652 |
| BRF2       | NM_018310    | 98.46012576 | 10.06484207 | 7.48E-07    | 9.782580304 |
| SETD1B     | NM_015048    | 59.40631088 | 12.62526553 | 0.004680764 | 4.705351402 |
| SEPW1      | NM_003009    | 141.8854476 | 26.18587559 | 3.00E-07    | 5.418396154 |
| MROH8      | NM_152503    | 120.1240738 | 4.342546522 | 5.30E-10    | 27.66212709 |
| SYPL1      | NM_182715    | 79.37036901 | 2.176458567 | 4.47E-08    | 36.46766827 |
| C11orf74   | NM_001276725 | 37.69364998 | 0.867782223 | 0.000366978 | 43.4367621  |
| WSB1       | NM_134265    | 154.7089561 | 4.696776991 | 1.01E-13    | 32.93938725 |
| ILDR1      | NM_175924    | 63.82653061 | 5.34558563  | 7.14E-05    | 11.94004456 |
| PLEKHG4    | NM_001129731 | 81.60483533 | 13.60653354 | 0.000144342 | 5.997474309 |
| YTHDF3     | NM_001277817 | 110.4093329 | 3.21689704  | 1.43E-10    | 34.32168688 |
| GTF2IRD1   | NM_016328    | 102.8316327 | 10.38315344 | 8.17E-07    | 9.903699605 |
| TRIM52-AS1 | NR_102762    | 108.1748666 | 13.57881124 | 1.02E-06    | 7.96644601  |
| RAB3IP     | NM_175624    | 41.23956835 | 3.181296296 | 0.002039775 | 12.96313343 |
| SEC61A2    | NM_001142627 | 107.737716  | 5.347154946 | 3.96E-09    | 20.14860558 |
| RGL3       | NM_001161616 | 119.6869232 | 12.485098   | 6.34E-08    | 9.586382356 |
| KAT7       | NM_001199157 | 152.086052  | 7.459421095 | 3.80E-12    | 20.3884524  |
| DCP2       | NM_001242377 | 101.5201806 | 4.754008373 | 1.41E-08    | 21.3546491  |
| SLC39A6    | NM_001099406 | 75.82445064 | 5.65264174  | 2.03E-06    | 13.41398485 |
| GATC       | NM_176818    | 86.02505507 | 12.2070065  | 3.88E-05    | 7.047186799 |
| ASAH1      | NM_004315    | 58.5320095  | 4.816868418 | 0.000209202 | 12.15146531 |
| MYO19      | NM_001163735 | 89.57097344 | 13.20014799 | 3.33E-05    | 6.785603732 |
| TMBIM6     | NM_001098576 | 58.09485881 | 6.402724835 | 0.000815966 | 9.073458614 |
| USP15      | NM_001252079 | 61.64077717 | 3.629238911 | 1.49E-05    | 16.98449143 |
| VPS72      | NM_001271087 | 86.89935644 | 8.698510848 | 7.20E-06    | 9.990141756 |
| FBXO44     | NM_033182    | 102.394482  | 10.9914305  | 4.71E-07    | 9.315846735 |
| FSIP1      | NM_152597    | 30.16466256 | 1.171824459 | 0.002072391 | 25.74162225 |
| ZNF271     | NR_024566    | 75.82445064 | 3.792740565 | 1.45E-06    | 19.99199506 |
| GFOD2      | NM_030819    | 69.1697646  | 5.69620378  | 2.43E-05    | 12.14313379 |
| ZNF526     | NM_133444    | 101.0830299 | 14.30734141 | 3.94E-06    | 7.065116225 |
| CST3       | NM_000099    | 98.8485636  | 18.4181486  | 5.39E-05    | 5.36691096  |
| NXPE3      | NM_001134456 | 71.8413816  | 3.26428444  | 1.69E-06    | 22.0083093  |
| YEATS4     | NM_006530    | 149.414435  | 3.38868523  | 9.24E-14    | 44.09215519 |
| UBE2J1     | NM_016021    | 136.9793643 | 1.785579303 | 6.73E-15    | 76.71424285 |
| YKT6       | NM_006555    | 131.6848432 | 6.803097135 | 1.49E-10    | 19.35660194 |
| FABP5      | NM_001444    | 160.0521901 | 24.27139897 | 1.01E-08    | 6.594271316 |
| ZNF143     | NM_001282656 | 108.6120173 | 5.460633765 | 6.39E-09    | 19.89000215 |
| TUG1       | NR_002323    | 71.8413816  | 12.50438351 | 0.00043586  | 5.745295761 |
| FAM210A    | NM_152352    | 64.74954487 | 1.088804836 | 3.10E-06    | 59.46845817 |
| FOXP4      | NM_001012426 | 109.9234694 | 12.45101052 | 8.81E-07    | 8.82847775  |
| C16orf59   | NM_025108    | 115.7038541 | 24.92788549 | 3.89E-05    | 4.641543069 |
| IFFO2      | NM_001136265 | 73.58998434 | 12.7807014  | 0.000450916 | 5.757898727 |
| TRAPPC12   | NM_016030    | 107.3005653 | 4.150287859 | 6.88E-09    | 25.85376458 |
| ZNF16      | NM_006958    | 90.4452748  | 13.18741585 | 1.49E-05    | 6.858453226 |
| GATAD2A    | NM_017660    | 94.42834386 | 7.680488212 | 9.21E-07    | 12.29457572 |
| GBF1       | NM_001199378 | 172.438548  | 8.427619515 | 2.45E-13    | 20.46112163 |
| MLF2       | NM_005439    | 112.1579357 | 10.80587261 | 6.83E-08    | 10.37935017 |
| ADAMTS17   | NM_139057    | 80.68182108 | 1.757150561 | 4.76E-07    | 45.91628222 |
| RPA1       | NM_002945    | 88.2108085  | 4.741455553 | 4.06E-07    | 18.60416227 |
| EIF3L      | NM_001242923 | 102.0060442 | 7.937201719 | 1.07E-07    | 12.85163812 |

|              |              |             |             |             |             |
|--------------|--------------|-------------|-------------|-------------|-------------|
| THEGL        | NM_001256475 | 31.47611462 | 0.840792196 | 0.001597855 | 37.43625925 |
| TRIM3        | NM_001248006 | 79.8075197  | 8.219057522 | 9.31E-06    | 9.710057326 |
| ETV6         | NM_001987    | 38.13080067 | 2.43537513  | 0.003924917 | 15.65705431 |
| SMYD3        | NM_001167740 | 55.42324183 | 1.22160441  | 1.33E-05    | 45.36922211 |
| LAS1L        | NM_031206    | 38.13080067 | 2.1945683   | 0.002358236 | 17.3750804  |
| ULK2         | NM_001142610 | 86.02505507 | 3.572348749 | 1.13E-07    | 24.080811   |
| SDHC         | NM_001035513 | 49.69157001 | 5.733043481 | 0.001511415 | 8.667572499 |
| LOC100507634 | NR_038320    | 125.0301571 | 0.827259695 | 4.22E-14    | 151.1377357 |
| BTF3         | NM_001207    | 107.3005653 | 6.839403677 | 6.48E-09    | 15.6885849  |
| HPS1         | NM_182639    | 142.3225982 | 8.577810732 | 4.01E-11    | 16.591949   |
| CEP350       | NM_014810    | 103.3174962 | 2.896050571 | 3.18E-09    | 35.67530803 |
| MOB4         | NM_001204094 | 112.1579357 | 0.577436816 | 4.01E-13    | 194.2341268 |
| CCDC90B      | NM_001286120 | 114.8295527 | 3.003145647 | 1.97E-10    | 38.23642481 |
| ATAD3A       | NM_018188    | 118.8126218 | 12.2616674  | 5.61E-08    | 9.689760606 |
| NDUFB3       | NM_001257102 | 44.34833603 | 1.506610845 | 0.000131724 | 29.4358269  |
| SNX7         | NM_152238    | 68.73261391 | 0.468038701 | 7.67E-08    | 146.8524156 |
| NUDT3        | NM_006703    | 105.5032497 | 4.090298538 | 1.30E-08    | 25.79353284 |
| TMEM44       | NM_138399    | 59.84346156 | 9.9373833   | 0.00190366  | 6.022054272 |
| DYNC1H1      | NM_001376    | 111.7207851 | 6.488018151 | 4.46E-09    | 17.21955495 |
| SMN1         | NM_022874    | 134.8423237 | 22.50695801 | 2.67E-07    | 5.991139437 |
| SCAMP1       | NM_001290229 | 55.86039251 | 3.083289589 | 5.58E-05    | 18.11714109 |
| AGO3         | NM_177422    | 103.754647  | 3.52666013  | 3.09E-09    | 29.42008675 |
| ARHGAP8      | NM_181335    | 70.04406598 | 6.51660604  | 1.75E-05    | 10.74855002 |
| LOC100505666 | NR_040772    | 94.86549455 | 15.04414162 | 2.79E-05    | 6.305809725 |
| DHRS7        | NM_016029    | 66.49814761 | 5.62151596  | 2.97E-05    | 11.82921975 |
| NUPL1        | NM_014089    | 54.98609113 | 4.208096311 | 0.000417833 | 13.0667378  |
| RPN2         | NM_002951    | 69.1697646  | 6.219578149 | 2.79E-05    | 11.1212952  |
| PALD1        | NM_014431    | 70.04406598 | 10.09825455 | 0.000266172 | 6.93625474  |
| PTPMT1       | NM_001143984 | 87.33650713 | 12.04655911 | 1.07E-05    | 7.249913135 |
| RRM2B        | NM_015713    | 62.07792787 | 3.13999222  | 9.29E-06    | 19.77008971 |
| UTP18        | NM_016001    | 105.5519625 | 4.424152238 | 5.45E-09    | 23.85812169 |
| MCPH1        | NM_001172574 | 97.53711154 | 0.64399674  | 7.12E-11    | 151.4559089 |
| RAD54L       | NM_003579    | 105.9404003 | 11.12785677 | 2.85E-07    | 9.520287915 |
| SLC25A5      | NM_001152    | 75.82445064 | 17.28481151 | 0.00227894  | 4.386767573 |
| ECI2         | NR_028588    | 44.78548671 | 5.666483693 | 0.002130157 | 7.903576386 |
| MRPL23       | NM_021134    | 94.42834386 | 20.35347062 | 0.000156121 | 4.639422221 |
| GPR107       | NM_001136557 | 99.7715779  | 5.371493423 | 4.38E-08    | 18.57427163 |
| CCDC134      | NM_024821    | 82.91628738 | 10.86727041 | 2.33E-05    | 7.629909285 |
| FBXL20       | NM_032875    | 80.68182108 | 3.041017538 | 4.29E-07    | 26.5311923  |
| MLKL         | NM_152649    | 64.74954487 | 4.395272273 | 3.15E-05    | 14.73163455 |
| FPGS         | NR_110170    | 101.5201806 | 14.65862395 | 3.53E-06    | 6.925628282 |
| ZDHHC20      | NM_153251    | 111.7207851 | 1.397121902 | 1.08E-10    | 79.96495147 |
| CHD2         | NM_001042572 | 125.4673077 | 6.649439104 | 9.55E-10    | 18.86885582 |
| TREX2        | NM_080701    | 42.11386972 | 4.87898609  | 0.004356825 | 8.631684727 |
| PPL          | NM_002705    | 119.6869232 | 12.70763229 | 1.03E-07    | 9.418506961 |
| GIGYF2       | NM_001103148 | 105.5032497 | 4.644158568 | 1.66E-08    | 22.717409   |
| SZT2         | NM_015284    | 93.99119317 | 10.94421613 | 3.56E-06    | 8.588206959 |
| LOC100288798 | NR_125379    | 99.7715779  | 4.031893299 | 7.84E-09    | 24.74558985 |
| EFCAB5       | NM_001145053 | 123.2328415 | 3.102668053 | 4.26E-11    | 39.71834543 |
| NCOA6        | NM_014071    | 106.377551  | 3.875442271 | 1.65E-09    | 27.44913834 |
| ADRBK2       | NM_005160    | 42.11386972 | 2.010383009 | 0.001148585 | 20.94818228 |
| CNOT8        | NM_001301083 | 47.45710371 | 4.804107994 | 0.001066682 | 9.878442318 |
| KMT2C        | NM_170606    | 49.64285714 | 0.919033897 | 4.13E-05    | 54.01635057 |
| SF3A2        | NM_007165    | 110.8464837 | 20.92119966 | 8.82E-06    | 5.298285254 |
| GGCT         | NM_001199816 | 67.85831254 | 4.018477424 | 3.08E-06    | 16.88657304 |
| IDUA         | NM_000203    | 118.375471  | 22.63914986 | 1.17E-05    | 5.228794886 |
| MAPK4        | NM_002747    | 48.33140508 | 2.779843768 | 0.000359297 | 17.3863746  |
| ARHGAP5      | NM_001173    | 120.1240738 | 3.039316825 | 4.52E-11    | 39.52338    |
| TUT1         | NM_022830    | 101.5201806 | 13.49796088 | 1.40E-06    | 7.521149414 |
| RPL22L1      | NM_001099645 | 93.11689181 | 21.40189396 | 0.0002455   | 4.350871563 |
| UNK          | NM_001080419 | 140.5252827 | 14.9229012  | 8.27E-09    | 9.416753537 |
| RRM2         | NM_001165931 | 100.6458792 | 20.20004352 | 5.39E-05    | 4.982458532 |

|                |              |             |             |             |             |
|----------------|--------------|-------------|-------------|-------------|-------------|
| ZFP37          | NM_001282518 | 43.47403467 | 2.643578277 | 0.000521578 | 16.44514749 |
| NELFCD         | NM_198976    | 120.1240738 | 8.85682298  | 4.18E-09    | 13.56288525 |
| TMEM135        | NM_001168724 | 71.40423091 | 1.493867459 | 2.66E-06    | 47.79823705 |
| COMMD8         | NM_017845    | 93.55404248 | 0.944476264 | 9.60E-12    | 99.05388418 |
| TWF2           | NM_007284    | 119.6869232 | 24.2029122  | 1.33E-05    | 4.945145534 |
| DCAF10         | NM_001286810 | 121.4842387 | 3.76671924  | 2.12E-10    | 32.25200259 |
| EPHA2          | NM_004431    | 128.5760755 | 19.86716846 | 2.41E-07    | 6.471786647 |
| ZNF430         | NM_001172671 | 62.51507855 | 0.577963664 | 1.04E-07    | 108.1643751 |
| ERCC6L         | NM_017669    | 39.00510204 | 2.13645664  | 0.001482802 | 18.25691255 |
| LINC01420      | NR_015367    | 38.13080067 | 1.408630322 | 0.003267188 | 27.06941635 |
| EDC3           | NM_001142444 | 50.12872071 | 4.827277054 | 0.000865729 | 10.38447144 |
| PRKCI          | NM_002740    | 90.4452748  | 2.615250174 | 2.37E-08    | 34.58379458 |
| ATF7           | NR_073163    | 84.71360301 | 4.589481034 | 8.96E-07    | 18.45820963 |
| PRCC           | NM_005973    | 79.37036901 | 6.034178875 | 1.88E-06    | 13.15346639 |
| CDC25A         | NM_201567    | 100.6458792 | 7.122925146 | 1.48E-07    | 14.12985215 |
| TMEM237        | NM_001044385 | 43.91118534 | 5.245318473 | 0.003903534 | 8.371500332 |
| KIAA1841       | NM_001129993 | 81.60483533 | 3.995831041 | 1.12E-06    | 20.42249396 |
| C18orf25       | NM_001008239 | 69.60691528 | 3.487513742 | 4.52E-06    | 19.95889348 |
| ADAM17         | NM_003183    | 75.82445064 | 4.312836624 | 4.20E-06    | 17.58110897 |
| IKZF5          | NR_073479    | 72.71568297 | 1.620272919 | 1.68E-07    | 44.87866342 |
| ZNF664-FAM101A | NM_001204299 | 130.3246782 | 4.704990303 | 1.12E-10    | 27.6992448  |
| SORL1          | NM_003105    | 41.23956835 | 3.028111266 | 0.002179176 | 13.61890787 |
| WDR27          | NM_001202550 | 115.2667034 | 2.313753151 | 3.10E-10    | 49.81806435 |
| FUT4           | NM_002033    | 99.7715779  | 19.42974984 | 3.53E-05    | 5.134990348 |
| TTC31          | NM_022492    | 58.5320095  | 8.24914924  | 0.000653116 | 7.095520738 |
| CETN2          | NM_004344    | 41.23956835 | 1.705587612 | 0.00050541  | 24.17909703 |
| GTF2H2C        | NM_001098728 | 96.22565948 | 1.667176899 | 6.56E-10    | 57.717726   |
| PYGL           | NM_002863    | 97.97426223 | 4.148670945 | 3.67E-08    | 23.61581902 |
| DCTN6          | NM_006571    | 88.2108085  | 4.783749576 | 1.94E-07    | 18.4396794  |
| LOC100289230   | NR_036530    | 109.4863187 | 13.91388985 | 3.71E-06    | 7.868850471 |
| XPC            | NM_001145769 | 150.2887363 | 8.481628545 | 3.49E-12    | 17.71932542 |
| TSNAX-DISC1    | NR_028396    | 81.60483533 | 3.922650584 | 2.87E-07    | 20.80349335 |
| ELP2           | NM_001242878 | 62.51507855 | 2.545005906 | 9.59E-06    | 24.56382455 |
| LOC100507557   | NR_038244    | 44.34833603 | 1.163067324 | 5.30E-05    | 38.13049779 |
| PCBP2          | NM_001128911 | 141.399584  | 14.16893435 | 1.53E-09    | 9.979549656 |
| KRT12          | NM_000223    | 30.16466256 | 1.162736947 | 0.002256669 | 25.94280903 |
| ULK3           | NM_001284365 | 119.2497724 | 18.40968362 | 8.16E-07    | 6.477556861 |
| SGOL2          | NM_001160046 | 83.35343807 | 1.228120234 | 4.18E-08    | 67.87074733 |
| CD4            | NM_001195014 | 51.00302207 | 6.239464705 | 0.000781071 | 8.174262454 |
| AAMDC          | NM_024684    | 52.31447414 | 4.899913598 | 0.000828527 | 10.67661155 |
| CD46           | NM_172353    | 82.91628738 | 3.590980088 | 1.23E-07    | 23.09015516 |
| COL6A4P1       | NR_027927    | 43.91118534 | 1.415932798 | 0.000671926 | 31.01219592 |
| CDKN3          | NM_001130851 | 132.9962952 | 7.265147719 | 5.97E-11    | 18.30606897 |
| PASK           | NM_001252124 | 70.96708023 | 8.657098167 | 6.26E-05    | 8.197559836 |
| ELK1           | NM_001257168 | 70.04406598 | 6.54904382  | 3.28E-05    | 10.69531185 |
| BABAM1         | NM_014173    | 69.1697646  | 13.27239971 | 0.000836726 | 5.21154924  |
| WFS1           | NM_001145853 | 79.8075197  | 9.434170389 | 4.30E-05    | 8.459410463 |
| TNFAIP3        | NM_006290    | 33.71058093 | 2.408529557 | 0.004078631 | 13.99633267 |
| TRMU           | NR_104241    | 183.9506044 | 13.99511297 | 8.25E-13    | 13.14391708 |
| TMEM127        | NM_001193304 | 101.5201806 | 12.70393624 | 1.28E-06    | 7.9912382   |
| COMMD6         | NM_001287393 | 75.38729997 | 2.557154841 | 6.75E-07    | 29.48092886 |
| TBC1D24        | NM_001199107 | 95.73979591 | 12.6844354  | 6.03E-06    | 7.547816906 |
| TRAF3IP2-AS1   | NR_034108    | 117.9383204 | 4.016576132 | 1.25E-09    | 29.36289927 |
| ZDHHC13        | NM_019028    | 196.8228258 | 1.982801541 | 2.76E-20    | 99.26501557 |
| FAM86B3P       | NR_024363    | 51.00302207 | 7.102097213 | 0.001947645 | 7.181402977 |
| CTNNB1         | NM_001098209 | 168.0183282 | 2.407107459 | 3.31E-17    | 69.80092539 |
| LETM1          | NM_012318    | 92.67974111 | 10.94511225 | 5.55E-06    | 8.467683018 |
| TRIM11         | NM_145214    | 92.19387756 | 19.08248936 | 0.000120106 | 4.83133389  |
| SLC12A7        | NM_006598    | 101.0830299 | 11.14322919 | 1.19E-06    | 9.071251085 |
| STAG3L5P       | NR_103720    | 119.6869232 | 3.404371905 | 5.37E-12    | 35.15682966 |
| AP2A1          | NM_014203    | 91.75672686 | 12.19684999 | 1.91E-05    | 7.522985602 |
| DUSP2          | NM_004418    | 158.6920252 | 33.00145663 | 7.99E-07    | 4.808636993 |

|         |              |             |             |             |             |
|---------|--------------|-------------|-------------|-------------|-------------|
| NEK1    | NM_001199399 | 93.99119317 | 2.81138884  | 2.25E-08    | 33.43229931 |
| ABCC5   | NM_001023587 | 70.04406598 | 5.70451961  | 1.17E-05    | 12.27869668 |
| SERINC5 | NM_178276    | 104.6289483 | 3.979683685 | 1.92E-09    | 26.29076996 |
| UNC5B   | NM_170744    | 97.53711154 | 10.25583915 | 2.20E-06    | 9.510397941 |
| MBD6    | NM_052897    | 133.8705966 | 29.28359403 | 5.48E-06    | 4.571522077 |
| NFU1    | NR_045631    | 91.31957618 | 5.452417571 | 1.74E-07    | 16.74845607 |
| SENP7   | NM_001282804 | 29.72751187 | 0.967661215 | 0.003791933 | 30.72099141 |
| SENP6   | NM_015571    | 132.9962952 | 1.761349199 | 1.35E-12    | 75.50819298 |
| ALDH7A1 | NM_001201377 | 56.29754319 | 2.705272884 | 4.12E-05    | 20.81030107 |
| TAOK3   | NM_016281    | 55.42324183 | 1.655953761 | 0.000102575 | 33.46907572 |
| ZNF784  | NM_203374    | 70.48121666 | 9.948585888 | 0.000117106 | 7.084546231 |
| CACNB1  | NM_000723    | 141.8367347 | 12.09464328 | 5.98E-10    | 11.72723588 |
| WLS     | NM_001193334 | 60.76647581 | 4.356557602 | 0.000166071 | 13.94827783 |
| C3orf33 | NM_173657    | 51.44017277 | 3.131719092 | 0.000144874 | 16.42553858 |
| TSPAN17 | NM_001006616 | 94.42834386 | 13.37091376 | 1.80E-05    | 7.062220694 |
| CTSB    | NM_147780    | 94.86549455 | 11.61235744 | 2.53E-06    | 8.169357088 |
| ZNF786  | NM_152411    | 145.8685166 | 9.123123838 | 3.50E-11    | 15.98887829 |
| FDX1L   | NM_001031734 | 77.13590271 | 11.89765892 | 0.000229312 | 6.483284084 |
| NMI     | NM_004688    | 26.1815935  | 0.388067028 | 0.001974192 | 67.46667875 |
| ECE2    | NM_032331    | 62.51507855 | 11.17953189 | 0.001912183 | 5.591922735 |
| RMND1   | NM_001271937 | 39.9281163  | 3.440021001 | 0.00188377  | 11.60693969 |
| GLG1    | NR_027265    | 121.4842387 | 5.017731829 | 5.02E-10    | 24.21098672 |
| SENP5   | NM_152699    | 86.89935644 | 3.72713008  | 9.35E-08    | 23.31535379 |
| BBX     | NM_001276286 | 51.00302207 | 1.788062675 | 0.00019832  | 28.52418026 |
| MTHFSD  | NM_022764    | 140.5252827 | 8.100632657 | 2.35E-11    | 17.3474454  |
| TRIM44  | NM_017583    | 89.13382275 | 2.140216303 | 5.69E-08    | 41.64710952 |
| RHOBTB3 | NM_014899    | 36.38219793 | 3.905620069 | 0.003676085 | 9.315344883 |
| TAMM41  | NM_001284401 | 78.93321834 | 4.164898877 | 2.08E-06    | 18.95201316 |
| OSTF1   | NM_012383    | 125.9044585 | 2.161269579 | 3.77E-12    | 58.25486081 |
| HMGXB3  | NM_014983    | 104.6289483 | 5.963779759 | 1.05E-08    | 17.54406643 |
| ETNK2   | NM_001297761 | 70.04406598 | 12.71426667 | 0.000611257 | 5.509092095 |
| DOCK4   | NM_014705    | 32.39912887 | 0.730253455 | 0.002167049 | 44.36696416 |
| PLA2G4C | NM_001159323 | 62.51507855 | 4.497498733 | 8.30E-05    | 13.8999658  |
| E2F2    | NM_004091    | 132.1219938 | 18.21719235 | 1.18E-07    | 7.252599156 |
| AP1B1   | NM_001166019 | 107.3005653 | 8.66678853  | 4.47E-08    | 12.38066037 |
| SFR1    | NM_001002759 | 125.9044585 | 9.343236126 | 2.88E-09    | 13.47546576 |
| MEGF11  | NM_032445    | 48.33140508 | 5.759575716 | 0.001740721 | 8.391487059 |
| FAM132B | NM_001291832 | 78.01020409 | 18.24114111 | 0.001221837 | 4.276607676 |
| ZNF302  | NM_018675    | 79.37036901 | 8.713610172 | 1.44E-05    | 9.108781257 |
| ACBD7   | NM_001039844 | 53.23748838 | 3.543845183 | 0.000186935 | 15.02252091 |
| PTPN23  | NM_015466    | 126.7787599 | 8.579910445 | 8.11E-10    | 14.77623347 |
| TCEANC2 | NM_153035    | 45.65978809 | 5.452085745 | 0.002589383 | 8.374737711 |
| REPIN1  | NM_001099695 | 104.6289483 | 21.25644177 | 2.86E-05    | 4.92222308  |
| MROH1   | NM_001099280 | 71.40423091 | 12.2699588  | 0.000262381 | 5.819435261 |
| MGST2   | NM_002413    | 48.33140508 | 3.774800825 | 0.000280234 | 12.80369676 |
| CYFIP1  | NM_014608    | 69.1697646  | 4.95791107  | 3.02E-05    | 13.95139276 |
| YME1L1  | NM_014263    | 70.09277885 | 4.615260957 | 1.20E-05    | 15.18717566 |
| DDX54   | NM_024072    | 148.05427   | 13.25071844 | 2.55E-10    | 11.17330133 |
| WDHD1   | NM_001008396 | 173.3128494 | 2.987610777 | 2.25E-16    | 58.0105182  |
| ORC3    | NM_012381    | 53.23748838 | 1.982516719 | 8.04E-05    | 26.85348773 |
| RELA    | NM_001243985 | 108.1748666 | 22.28718367 | 3.36E-05    | 4.853680404 |
| SLC9A8  | NM_001260491 | 82.91628738 | 6.748409486 | 1.60E-06    | 12.28678958 |
| ZFP64   | NM_018197    | 75.82445064 | 4.257567444 | 3.17E-06    | 17.80933635 |
| SH3GLB1 | NM_001206653 | 90.00812411 | 0.531507334 | 1.69E-11    | 169.3450275 |
| CSTF3   | NM_001033506 | 40.80241766 | 3.210117649 | 0.001386776 | 12.71056769 |
| DENND4C | NM_017925    | 79.37036901 | 2.379435139 | 3.85E-07    | 33.35681133 |
| TMEM123 | NM_052932    | 55.86039251 | 3.06885148  | 4.48E-05    | 18.2023773  |
| AREL1   | NM_001039479 | 110.8464837 | 3.963410982 | 2.00E-09    | 27.96744627 |
| FBXO21  | NM_015002    | 121.4842387 | 5.763517519 | 2.28E-10    | 21.07814165 |
| NME6    | NM_005793    | 93.55404248 | 13.20215944 | 1.03E-05    | 7.08626819  |
| KDM1B   | NM_153042    | 44.34833603 | 5.072548224 | 0.002705776 | 8.742812107 |
| MAPK12  | NM_002969    | 130.7618289 | 28.23117337 | 4.36E-06    | 4.631824092 |

|              |              |             |             |             |             |
|--------------|--------------|-------------|-------------|-------------|-------------|
| HSPG2        | NM_005529    | 95.73979591 | 12.44005541 | 2.38E-06    | 7.696090797 |
| SPRY4        | NM_030964    | 97.53711154 | 10.94250336 | 3.24E-06    | 8.913601245 |
| HPS5         | NM_007216    | 53.67463907 | 2.202905914 | 6.29E-05    | 24.36537972 |
| ZKSCAN1      | NM_001287054 | 122.7956908 | 6.090058204 | 6.83E-10    | 20.16330333 |
| LOC100630923 | NR_038967    | 60.76647581 | 9.241413421 | 0.000646023 | 6.57545259  |
| ZNF180       | NM_001288759 | 82.4791367  | 5.93681038  | 8.23E-07    | 13.89283663 |
| ZER1         | NM_006336    | 94.86549455 | 11.55330622 | 3.17E-06    | 8.211112281 |
| AP3S2        | NR_037582    | 101.5201806 | 5.011502214 | 1.96E-08    | 20.25743505 |
| CD99P1       | NR_033381    | 59.40631088 | 2.085774711 | 1.09E-05    | 28.48165267 |
| TARS2        | NR_073514    | 68.29546324 | 8.323687331 | 8.63E-05    | 8.204952988 |
| SSBP1        | NR_046269    | 85.1507537  | 7.025653436 | 1.12E-06    | 12.11997638 |
| BRI3BP       | NM_080626    | 108.6120173 | 8.453337252 | 2.93E-08    | 12.84841881 |
| FRS2         | NM_001278355 | 101.0830299 | 4.023425702 | 4.28E-08    | 25.12362286 |
| PREPL        | NM_001171606 | 88.2108085  | 3.890435516 | 2.58E-07    | 22.67376188 |
| EXOSC2       | NM_001282708 | 115.2667034 | 8.244778439 | 8.23E-09    | 13.98057015 |
| KLC2         | NM_022822    | 101.9573313 | 24.40372751 | 0.000102215 | 4.1779409   |
| GGA3         | NM_001291641 | 105.5519625 | 21.62578878 | 3.67E-05    | 4.880837576 |
| MKS1         | NM_017777    | 93.99119317 | 9.668965197 | 1.30E-06    | 9.72091545  |
| FH           | NM_000143    | 125.0301571 | 1.582459872 | 5.46E-14    | 79.01000168 |
| WDR44        | NM_001184966 | 39.00510204 | 1.386043928 | 0.001835707 | 28.14131734 |
| SERPINB9     | NM_004155    | 143.1968996 | 8.241431006 | 2.85E-11    | 17.37524703 |
| ATRAID       | NM_016085    | 132.1219938 | 9.174665769 | 2.67E-10    | 14.40074191 |
| PAPL         | NM_001004318 | 70.48121666 | 6.262789734 | 1.08E-05    | 11.25396503 |
| STARD7-AS1   | NR_046322    | 217.2240347 | 6.419820225 | 5.08E-19    | 33.83646692 |
| RNH1         | NM_203384    | 93.11689181 | 19.81543384 | 0.000181748 | 4.69921035  |
| SAE1         | NR_027280    | 103.754647  | 10.26252529 | 7.23E-07    | 10.1100503  |
| PFKFB3       | NM_001145443 | 58.5320095  | 8.853511405 | 0.00113822  | 6.61116328  |
| SEC31A       | NM_001077206 | 86.89935644 | 3.379186115 | 9.25E-08    | 25.71606106 |
| AAGAB        | NM_024666    | 84.71360301 | 3.603216828 | 7.83E-08    | 23.51054823 |
| EZH1         | NM_001991    | 101.9573313 | 4.808572507 | 1.41E-08    | 21.20324298 |
| GDI2         | NM_001494    | 43.91118534 | 4.92414277  | 0.004468407 | 8.917528876 |
| PMF1-BGLAP   | NM_001199663 | 89.57097344 | 9.014383398 | 1.85E-06    | 9.936450392 |
| DCBLD2       | NM_080927    | 188.8566877 | 9.030093381 | 6.97E-15    | 20.91414559 |
| ORC1         | NM_004153    | 93.99119317 | 7.711316692 | 5.31E-07    | 12.18873468 |
| GOLGA4       | NM_001172713 | 100.2087285 | 2.891468349 | 5.09E-09    | 34.65669219 |
| IL1R1        | NM_000877    | 67.37244898 | 0.507812469 | 1.17E-08    | 132.6719077 |
| MTMR10       | NM_017762    | 66.49814761 | 2.561428141 | 5.61E-06    | 25.96135591 |
| SH3BGR       | NM_001001713 | 54.11178977 | 0.299694058 | 1.13E-06    | 180.5567654 |
| BSPRY        | NM_017688    | 70.91836734 | 8.093430943 | 4.92E-05    | 8.762460302 |
| TAF15        | NM_139215    | 178.6560833 | 5.352921688 | 3.57E-16    | 33.37543377 |
| STXBP1       | NM_003165    | 138.2908163 | 7.573564564 | 1.53E-10    | 18.25967352 |
| LOC101929295 | NR_110303    | 47.45710371 | 5.571583731 | 0.002541385 | 8.517704481 |
| PAPD4        | NM_173797    | 44.34833603 | 4.474050474 | 0.002691986 | 9.912345934 |
| ZNF689       | NR_104166    | 65.18669554 | 5.444317599 | 4.08E-05    | 11.97334549 |
| LRP6         | NM_002336    | 57.65770813 | 2.345188331 | 5.52E-05    | 24.58553429 |
| PNP          | NM_000270    | 151.1630377 | 6.700846812 | 1.97E-13    | 22.55879622 |
| MRPL43       | NM_176794    | 95.3513581  | 19.09491496 | 0.000102215 | 4.993547147 |
| NT5C3B       | NR_033465    | 105.066099  | 10.11730066 | 3.48E-07    | 10.38479556 |
| FARP1        | NM_005766    | 88.64795919 | 3.681270277 | 8.72E-08    | 24.08080703 |
| B4GALT3      | NM_001199874 | 93.55404248 | 19.23649762 | 0.000112057 | 4.86336153  |
| AKIP1        | NR_045418    | 109.4863187 | 7.650218227 | 1.61E-08    | 14.31152883 |
| CFAP97       | NM_020827    | 92.19387756 | 3.557970239 | 1.75E-08    | 25.9119305  |
| NAA16        | NM_024561    | 58.09485881 | 3.596920412 | 4.99E-05    | 16.15127725 |
| ACP2         | NM_001131064 | 145.431366  | 27.82287929 | 8.95E-07    | 5.227042265 |
| ARMCS        | NM_001105247 | 69.1697646  | 16.20835256 | 0.00195408  | 4.267538254 |
| NDUFAF5      | NM_001039375 | 58.5320095  | 1.433293089 | 1.70E-05    | 40.8374323  |
| CCDC50       | NM_178335    | 58.5320095  | 1.035300989 | 2.70E-06    | 56.53622487 |
| DLGAP5       | NM_001146015 | 48.33140508 | 5.346515437 | 0.001452763 | 9.039795294 |
| TAF1A        | NM_001201536 | 38.13080067 | 1.715099189 | 0.002495009 | 22.23241718 |
| LRRRC8D      | NM_001134479 | 47.01995303 | 3.489878998 | 0.000642852 | 13.47323304 |
| PPIE         | NR_036543    | 61.64077717 | 8.951052717 | 0.0008683   | 6.886427677 |
| METTL21B     | NM_206914    | 79.8075197  | 7.270599212 | 3.28E-06    | 10.97674585 |

|           |              |             |             |             |             |
|-----------|--------------|-------------|-------------|-------------|-------------|
| RABL6     | NM_001173989 | 159.5663266 | 13.58259975 | 2.42E-11    | 11.74784868 |
| URGCP     | NM_001290076 | 93.99119317 | 5.552636637 | 1.11E-07    | 16.92730847 |
| EIF1B-AS1 | NR_033965    | 61.64077717 | 2.021946056 | 1.49E-05    | 30.48586632 |
| MAU2      | NM_015329    | 125.9044585 | 11.66219481 | 6.27E-09    | 10.79594884 |
| KIF9-AS1  | NR_033373    | 97.53711154 | 4.235229805 | 6.76E-08    | 23.02994549 |
| PLCB3     | NM_000932    | 137.8536657 | 21.88658401 | 1.17E-07    | 6.298546433 |
| INTS12    | NM_001142471 | 119.2497724 | 1.118467082 | 1.23E-13    | 106.618938  |
| FKBP5     | NM_001145777 | 122.7956908 | 5.058906757 | 4.14E-10    | 24.27316745 |
| AADAT     | NM_001286682 | 101.9573313 | 1.503865222 | 8.43E-11    | 67.79685424 |
| TPRA1     | NM_001136053 | 90.8824255  | 11.59730433 | 1.25E-05    | 7.836512942 |
| SEC23B    | NM_032985    | 105.5032497 | 3.415371903 | 7.84E-10    | 30.89070609 |
| PDHB      | NR_033384    | 106.377551  | 5.434980071 | 4.11E-09    | 19.57275825 |
| MEGF9     | NM_001080497 | 91.75672686 | 2.697095542 | 3.02E-08    | 34.02056969 |
| E2F8      | NM_001256372 | 66.06099693 | 3.836396972 | 1.80E-05    | 17.21954151 |
| E2F3      | NM_001949    | 158.740738  | 7.893812239 | 1.70E-12    | 20.10951531 |
| FAM98C    | NM_174905    | 61.2036265  | 10.83883797 | 0.002427708 | 5.64669632  |
| GMPR2     | NM_001002002 | 51.00302207 | 6.347801231 | 0.001193358 | 8.034754116 |
| WDR73     | NM_032856    | 101.9573313 | 10.4518429  | 7.05E-07    | 9.754962091 |
| XPO7      | NM_015024    | 93.55404248 | 3.785911619 | 1.70E-08    | 24.71110049 |
| LPAR3     | NM_012152    | 58.5320095  | 5.08154618  | 0.000287936 | 11.51854326 |
| RAB3GAP1  | NM_012233    | 55.86039251 | 2.538601848 | 5.33E-05    | 22.00439291 |
| STX12     | NM_177424    | 58.09485881 | 4.621472151 | 0.000255649 | 12.57063916 |
| FIZ1      | NM_032836    | 136.9793643 | 11.85271117 | 9.30E-10    | 11.55679593 |
| SOGA1     | NM_080627    | 85.10204081 | 9.733531765 | 1.84E-05    | 8.743182112 |
| RNF24     | NM_001134337 | 79.8075197  | 3.5279166   | 3.60E-07    | 22.62171382 |
| DNAJC10   | NM_001271581 | 97.53711154 | 1.966795318 | 3.41E-09    | 49.59189735 |
| CDC42BPB  | NM_006035    | 70.91836734 | 7.591806443 | 7.85E-05    | 9.341435122 |
| ATG10     | NM_031482    | 137.8536657 | 2.796874199 | 2.99E-12    | 49.28847558 |
| AEBP2     | NM_001114176 | 113.0322371 | 2.037948227 | 9.65E-11    | 55.46374319 |
| PML       | NM_033246    | 43.91118534 | 4.697889869 | 0.004442113 | 9.347001859 |
| MRPS31P5  | NR_051965    | 71.40423091 | 4.652402042 | 8.73E-06    | 15.34782039 |
| CHCHD10   | NM_001301339 | 135.6679122 | 23.75337364 | 3.62E-06    | 5.711521836 |
| FOXJ2     | NM_018416    | 115.7038541 | 7.01726673  | 4.60E-09    | 16.48845036 |
| MCM8      | NM_001281520 | 111.2836343 | 3.695375091 | 1.50E-09    | 30.11430005 |
| EMC4      | NM_016454    | 83.35343807 | 6.143192443 | 1.46E-06    | 13.56842372 |
| FUS       | NM_001170634 | 243.3569153 | 16.86233939 | 2.85E-17    | 14.43197825 |
| TNK1      | NM_001251902 | 156.9434224 | 21.67186387 | 3.07E-09    | 7.241805473 |
| CPSF2     | NM_017437    | 118.8126218 | 3.235292688 | 1.73E-11    | 36.7239175  |
| AMOTL2    | NM_001278685 | 65.18669554 | 13.4204416  | 0.001667006 | 4.857269043 |
| ALDH3B1   | NM_001290059 | 96.22565948 | 16.26272184 | 1.70E-05    | 5.91694677  |
| LYRM4     | NR_104417    | 82.91628738 | 1.856963237 | 1.88E-07    | 44.65155031 |
| SRP9      | NM_003133    | 74.95014928 | 7.694748565 | 1.71E-05    | 9.740428637 |
| OXNAD1    | NM_138381    | 69.60691528 | 2.561907224 | 2.37E-06    | 27.16995941 |
| TARDBP    | NM_007375    | 188.4195371 | 10.62669783 | 4.85E-15    | 17.73077018 |
| PLEKHD1   | NM_001161498 | 49.64285714 | 7.065556697 | 0.004935393 | 7.026036202 |
| KLHL28    | NM_017658    | 72.27853228 | 0.633174301 | 8.64E-09    | 114.1526625 |
| TRIT1     | NM_017646    | 89.57097344 | 3.806554818 | 2.45E-07    | 23.53071944 |
| MCUR1     | NM_001031713 | 90.8824255  | 4.905079817 | 1.09E-07    | 18.52822561 |
| SHKBP1    | NM_138392    | 69.1697646  | 14.85684216 | 0.00238708  | 4.655751463 |
| WDR76     | NM_001167941 | 81.60483533 | 4.29229123  | 9.32E-07    | 19.01195211 |
| C3orf17   | NM_015412    | 46.14565165 | 4.075170957 | 0.001753003 | 11.32361124 |
| CDKL5     | NM_003159    | 39.00510204 | 1.115318408 | 0.000293559 | 34.97216736 |
| PEX11A    | NM_003847    | 51.44017277 | 0.581143614 | 1.78E-06    | 88.51542288 |
| VMA21     | NM_001017980 | 66.49814761 | 1.381116075 | 2.28E-07    | 48.14812367 |
| FBXO28    | NM_001136115 | 172.438548  | 2.679343341 | 4.80E-17    | 64.35851104 |
| UBR7      | NR_038150    | 50.5658714  | 7.141098896 | 0.002540987 | 7.080965007 |
| AKT2      | NM_001243028 | 88.2108085  | 12.66251786 | 3.56E-05    | 6.966292917 |
| PRSS23    | NR_120593    | 59.40631088 | 2.619205956 | 3.00E-05    | 22.68103841 |
| SPOCD1    | NM_001281987 | 63.38937993 | 10.04466873 | 0.001016332 | 6.310748677 |
| SWAP70    | NM_001297714 | 59.84346156 | 5.206415161 | 0.000165781 | 11.4941778  |
| SMC3      | NM_005445    | 135.6679122 | 6.849561557 | 1.15E-10    | 19.80680239 |
| FAM86EP   | NR_024253    | 62.95222924 | 10.06210082 | 0.000806488 | 6.256370348 |

|           |              |             |             |             |             |
|-----------|--------------|-------------|-------------|-------------|-------------|
| KIAA1731  | NM_033395    | 108.1748666 | 3.014236986 | 4.70E-10    | 35.88797668 |
| FBXO18    | NM_001258452 | 125.0301571 | 9.758992167 | 6.54E-09    | 12.81178988 |
| STRIP1    | NM_033088    | 72.71568297 | 9.477229079 | 0.000180656 | 7.672673348 |
| DHX29     | NM_019030    | 99.33442714 | 3.295683377 | 2.62E-09    | 30.14076772 |
| ZYG11B    | NM_024646    | 132.5591446 | 3.452085734 | 5.18E-12    | 38.3997255  |
| ZNF57     | NM_173480    | 55.86039251 | 6.577884809 | 0.000730516 | 8.492151221 |
| ACIN1     | NM_001164816 | 73.15283366 | 17.00105963 | 0.000899767 | 4.30283966  |
| NUP107    | NM_020401    | 97.53711154 | 2.901532605 | 4.77E-09    | 33.61572135 |
| VIPAS39   | NM_022067    | 107.737716  | 2.448901359 | 7.72E-11    | 43.9943061  |
| PLEKHF2   | NM_024613    | 70.52992954 | 2.691553695 | 6.45E-07    | 26.20416961 |
| ACTN1     | NM_001130004 | 80.2446704  | 12.06663743 | 5.75E-05    | 6.650126919 |
| SLC30A5   | NM_001251969 | 74.95014928 | 5.848555772 | 1.02E-05    | 12.81515509 |
| TRAP1     | NM_016292    | 107.737716  | 9.345167643 | 4.58E-08    | 11.52870875 |
| PPIG      | NM_004792    | 84.22773945 | 3.389113938 | 1.40E-07    | 24.85243665 |
| UBE4B     | NM_001105562 | 66.06099693 | 4.014098416 | 9.66E-06    | 16.45724396 |
| RNF170    | NM_001160224 | 56.29754319 | 2.753745168 | 3.90E-05    | 20.44399164 |
| COPG2     | NM_012133    | 66.06099693 | 0.850414987 | 6.48E-07    | 77.68089452 |
| PDSS2     | NM_020381    | 56.78340675 | 1.987566685 | 6.03E-05    | 28.56930899 |
| APBB2     | NM_001166050 | 43.91118534 | 3.713536142 | 0.001265723 | 11.82462851 |
| SLC25A12  | NM_003705    | 48.33140508 | 3.287397246 | 0.000346986 | 14.70202761 |
| CMPK1     | NM_001136140 | 119.2497724 | 5.407903922 | 3.75E-10    | 22.05101535 |
| DDX26B    | NM_182540    | 55.86039251 | 1.380696177 | 3.00E-05    | 40.45813512 |
| PIGT      | NR_047691    | 113.9552513 | 8.053083707 | 6.48E-09    | 14.15051122 |
| NXF1      | NM_006362    | 133.4821588 | 21.16478312 | 1.46E-07    | 6.306804943 |
| MDM4      | NM_001204172 | 88.69667206 | 6.637424426 | 1.86E-06    | 13.36311593 |
| NMU       | NM_001292045 | 94.42834386 | 2.690158337 | 5.60E-09    | 35.10140744 |
| SMAGP     | NM_001031628 | 66.93529829 | 4.680510746 | 2.98E-05    | 14.30085346 |
| JADE3     | NM_014735    | 55.86039251 | 2.321746868 | 5.50E-05    | 24.05963944 |
| PPP2R1B   | NM_002716    | 62.51507855 | 3.855726357 | 5.38E-05    | 16.21356724 |
| TMEM116   | NM_138341    | 117.9383204 | 4.945038829 | 1.12E-09    | 23.84982696 |
| SIM2      | NM_005069    | 54.98609113 | 5.645174822 | 0.000478393 | 9.740369937 |
| IL13RA1   | NM_001560    | 70.48121666 | 1.571879308 | 1.22E-06    | 44.83882211 |
| RBP7      | NM_052960    | 51.00302207 | 2.430492065 | 6.94E-05    | 20.98464867 |
| LINC00535 | NR_033858    | 109.9721823 | 1.171144293 | 6.34E-11    | 93.90147992 |
| PCCA      | NM_001178004 | 48.33140508 | 2.759353731 | 0.000384573 | 17.51548    |
| ELMOD2    | NM_153702    | 78.49606764 | 3.964350252 | 2.31E-06    | 19.80048751 |
| WARS      | NM_173701    | 84.27645233 | 7.880345606 | 6.55E-06    | 10.69451221 |
| GNPNAT1   | NM_198066    | 76.69875203 | 3.994114248 | 1.15E-06    | 19.20294395 |
| CREBZF    | NR_028027    | 168.4554789 | 12.70754605 | 2.70E-12    | 13.25633433 |
| JAK2      | NM_004972    | 76.26160134 | 1.158929547 | 4.19E-08    | 65.8034835  |
| NCAPH     | NM_001281711 | 122.7956908 | 8.954013012 | 1.93E-09    | 13.7140398  |
| CDKN1C    | NM_001122631 | 90.00812411 | 19.56595739 | 0.00030822  | 4.600241242 |
| MCM9      | NM_153255    | 109.4863187 | 4.29216873  | 1.36E-09    | 25.50839112 |
| ACAD11    | NM_032169    | 54.54894044 | 1.333303789 | 7.64E-05    | 40.91261187 |
| PPIB      | NM_000942    | 105.5032497 | 17.99118275 | 1.36E-05    | 5.864164192 |
| PWWP2A    | NM_001130864 | 79.8075197  | 1.189922347 | 2.06E-08    | 67.0695192  |
| TPGS1     | NM_033513    | 155.5832575 | 15.29335139 | 4.35E-10    | 10.17326115 |
| PDIA6     | NM_001282707 | 86.89935644 | 2.225229297 | 1.93E-08    | 39.05186606 |
| SYNRG     | NM_198882    | 94.42834386 | 3.184206978 | 1.60E-08    | 29.65521541 |
| RPS14     | NM_005617    | 178.2189327 | 24.4883972  | 6.76E-10    | 7.277688744 |
| CHID1     | NM_001142677 | 104.1917976 | 16.59509492 | 8.37E-06    | 6.278469515 |
| GKAP1     | NM_025211    | 70.04406598 | 0.405516458 | 1.71E-08    | 172.7280473 |
| PRKCDBP   | NM_145040    | 75.38729997 | 15.99232347 | 0.002811162 | 4.713967931 |
| LINC01012 | NR_038293    | 35.94504724 | 2.133887278 | 0.001935954 | 16.84486693 |
| RCHY1     | NM_015436    | 52.31447414 | 4.003581897 | 0.00070358  | 13.06691745 |
| NEMF      | NM_004713    | 66.98401118 | 4.982542517 | 4.87E-05    | 13.44374101 |
| FLNB      | NM_001164319 | 104.1917976 | 5.462159588 | 3.11E-08    | 19.07520202 |
| CRYZL1    | NM_145858    | 40.36526697 | 1.961888399 | 0.001672532 | 20.57470088 |
| RNF130    | NM_018434    | 72.71568297 | 2.782821743 | 2.44E-06    | 26.13019793 |
| SAMD8     | NM_001174156 | 126.3416091 | 2.601032584 | 7.76E-12    | 48.57363569 |
| PROSC     | NM_007198    | 93.55404248 | 8.629931859 | 1.46E-06    | 10.84064672 |
| TMEM50B   | NM_006134    | 70.48121666 | 2.672459035 | 9.37E-07    | 26.37317008 |

|                |              |             |             |             |             |
|----------------|--------------|-------------|-------------|-------------|-------------|
| TMEM246        | NM_032342    | 82.91628738 | 2.508998552 | 5.13E-08    | 33.04756287 |
| PDE9A          | NM_001001573 | 56.29754319 | 5.475814966 | 0.00030724  | 10.28112592 |
| ASL            | NM_001024944 | 86.02505507 | 13.00170037 | 4.05E-05    | 6.616446513 |
| GSTK1          | NM_015917    | 102.0060442 | 8.931884507 | 1.25E-07    | 11.42043922 |
| SRD5A3         | NM_024592    | 68.73261391 | 5.464716214 | 1.83E-05    | 12.57752667 |
| CDK20          | NM_001170640 | 47.8942544  | 6.922336875 | 0.002878163 | 6.91879856  |
| KIF1C          | NM_006612    | 105.5032497 | 12.80875026 | 1.18E-06    | 8.236810578 |
| BDNF-AS        | NR_033312    | 173.75      | 0.284244208 | 7.32E-21    | 611.270152  |
| ERBB2          | NM_001289937 | 70.09277885 | 14.31051737 | 0.000679669 | 4.89799055  |
| NGFR           | NM_002507    | 137.8536657 | 19.74634216 | 1.17E-07    | 6.98122541  |
| TBCEL          | NM_152715    | 79.8075197  | 1.953420234 | 1.96E-07    | 40.8552744  |
| FAM63B         | NM_001040453 | 49.25441934 | 3.33579835  | 0.000333887 | 14.76540671 |
| ARSG           | NM_014960    | 71.40423091 | 10.1202899  | 0.000279506 | 7.05555193  |
| CEP63          | NM_001042384 | 35.94504724 | 3.510689036 | 0.003752349 | 10.23874427 |
| PDRG1          | NM_030815    | 66.54686048 | 15.7530621  | 0.002954428 | 4.224376192 |
| SP3            | NM_001172712 | 154.7089561 | 8.981214692 | 4.09E-12    | 17.22583876 |
| ZNF74          | NM_001256525 | 71.40423091 | 9.542543381 | 0.000150843 | 7.482725313 |
| PSMA5          | NM_001199772 | 107.737716  | 2.571190467 | 6.47E-11    | 41.90188063 |
| ASB16-AS1      | NR_049730    | 56.34625608 | 10.95962497 | 0.002230931 | 5.141257683 |
| DPM1           | NM_003859    | 71.40423091 | 4.604263928 | 7.86E-06    | 15.50828363 |
| ZNF703         | NM_025069    | 97.97426223 | 23.72235849 | 0.000424711 | 4.130038853 |
| STYK1          | NM_018423    | 51.87732345 | 2.954146101 | 0.0001553   | 17.56085233 |
| PDE4B          | NM_002600    | 30.60181325 | 1.162027781 | 0.002240425 | 26.3348379  |
| NCOA7          | NM_001122842 | 56.34625608 | 2.170665428 | 5.35E-05    | 25.95805662 |
| HADHB          | NM_001281513 | 84.66489013 | 3.294182355 | 6.17E-08    | 25.70133678 |
| BDH1           | NM_203314    | 65.62384623 | 9.863113537 | 0.000679709 | 6.653461504 |
| TTPAL          | NM_001039199 | 159.6150394 | 5.32800624  | 3.62E-14    | 29.95774259 |
| TRAF3          | NM_145726    | 60.28061224 | 5.587393091 | 0.000176448 | 10.78868289 |
| TGFB2          | NM_003238    | 30.60181325 | 0.667326716 | 0.001640459 | 45.85731772 |
| LGR4           | NM_018490    | 47.45710371 | 1.331397473 | 0.000278947 | 35.64457997 |
| IVNS1ABP       | NM_006469    | 151.1630377 | 5.373256658 | 4.11E-13    | 28.13248042 |
| FKBP1A         | NM_001199786 | 108.1748666 | 10.36857287 | 1.27E-07    | 10.4329562  |
| VWA8-AS1       | NR_039974    | 104.6289483 | 1.159072926 | 3.34E-12    | 90.26951276 |
| ACSS2          | NM_018677    | 93.11689181 | 5.900764584 | 1.16E-07    | 15.78047903 |
| GSTO2          | NM_001191014 | 156.5062718 | 4.265070231 | 9.75E-15    | 36.69488737 |
| KCTD5          | NM_018992    | 151.1630377 | 15.49251532 | 6.69E-10    | 9.757165612 |
| DHRS4          | NM_021004    | 110.4093329 | 5.909825906 | 3.19E-09    | 18.68233255 |
| SULT1A1        | NM_177536    | 58.5320095  | 10.96681047 | 0.002680764 | 5.337195317 |
| SORBS1         | NM_015385    | 59.40631088 | 3.710674006 | 3.46E-05    | 16.00957421 |
| HS6ST1         | NM_004807    | 70.04406598 | 9.77925479  | 0.000246027 | 7.162515701 |
| SNAI1          | NM_005985    | 166.2210125 | 36.46713449 | 3.11E-07    | 4.558104574 |
| ENY2           | NM_001193557 | 133.9193095 | 6.605811119 | 4.48E-11    | 20.27295468 |
| MSLN           | NM_001177355 | 79.8075197  | 18.5029918  | 0.000671268 | 4.313222455 |
| SNX25          | NM_031953    | 62.95222924 | 2.895641543 | 1.69E-05    | 21.74033916 |
| HEATR6         | NM_022070    | 111.2836343 | 7.082573909 | 1.52E-08    | 15.71231529 |
| G3BP2          | NM_203504    | 50.12872071 | 6.02815276  | 0.000768641 | 8.315768147 |
| ST20           | NR_037652    | 97.53711154 | 5.270818092 | 2.81E-08    | 18.50511815 |
| EYA3           | NM_001990    | 46.14565165 | 6.016887855 | 0.0028705   | 7.669355449 |
| CABIN1         | NM_001199281 | 90.4452748  | 8.378430043 | 1.71E-06    | 10.79501462 |
| ZNF584         | NM_173548    | 76.26160134 | 7.160203884 | 6.01E-06    | 10.65075836 |
| ANKRD12        | NM_015208    | 37.2564993  | 2.515860903 | 0.003811762 | 14.80864831 |
| SPCS3          | NM_021928    | 69.60691528 | 5.157259785 | 8.53E-06    | 13.49687978 |
| RNF34          | NM_025126    | 148.9772843 | 7.351154198 | 2.68E-12    | 20.26583585 |
| FBXO41         | NM_001080410 | 127.6530613 | 22.24712643 | 1.40E-06    | 5.737957289 |
| RBBP6          | NM_018703    | 116.6268684 | 4.456659794 | 3.46E-10    | 26.16912077 |
| TMEM110-MUSTN1 | NM_001198974 | 87.33650713 | 5.348957971 | 4.16E-07    | 16.32776096 |
| OSTC           | NM_021227    | 37.2564993  | 2.868853585 | 0.002383047 | 12.98654609 |
| ECT2           | NM_001258316 | 49.25441934 | 3.42947299  | 0.000322474 | 14.36209572 |
| ZFP1           | NM_153688    | 127.2159105 | 2.651419934 | 2.30E-12    | 47.98029497 |
| 6-Mar          | NM_001270660 | 59.40631088 | 4.597359449 | 0.000161412 | 12.92183297 |
| BIRC2          | NM_001256166 | 71.8413816  | 3.990817791 | 8.78E-06    | 18.00166917 |
| NDUFS5         | NM_004552    | 82.4791367  | 6.218188523 | 9.56E-07    | 13.26417435 |



|              |              |             |             |             |             |
|--------------|--------------|-------------|-------------|-------------|-------------|
| HEXB         | NM_000521    | 109.049168  | 3.908796156 | 2.28E-09    | 27.89840239 |
| ATP11B       | NM_014616    | 132.5591446 | 2.925314117 | 5.58E-12    | 45.31449933 |
| G3BP1        | NM_005754    | 112.1579357 | 4.661365252 | 1.37E-09    | 24.06117728 |
| GLRX5        | NM_016417    | 136.9793643 | 7.757946501 | 2.00E-11    | 17.65665234 |
| SERINC3      | NM_198941    | 69.60691528 | 4.107649458 | 1.46E-05    | 16.94568049 |
| FAM83B       | NM_001010872 | 69.1697646  | 1.850542788 | 3.51E-06    | 37.37809524 |
| PVRL1        | NM_002855    | 69.1697646  | 9.565775932 | 0.000128777 | 7.230962244 |
| FN3KRP       | NR_046408    | 132.9962952 | 14.86265597 | 2.22E-08    | 8.948353209 |
| HSD17B4      | NM_000414    | 69.60691528 | 1.338997314 | 2.66E-06    | 51.98435767 |
| TBC1D12      | NM_015188    | 44.78548671 | 2.52736661  | 0.000628863 | 17.72021777 |
| COL4A3       | NM_000091    | 39.9281163  | 2.721543445 | 0.002131148 | 14.67112949 |
| CPSF7        | NM_001136040 | 109.5350315 | 8.57348655  | 2.55E-08    | 12.77601952 |
| MAP3K7       | NM_145332    | 55.86039251 | 2.774963433 | 4.77E-05    | 20.13013643 |
| DNAH14       | NM_001145154 | 68.73261391 | 1.827109284 | 3.41E-06    | 37.61822816 |
| RNASEH1      | NM_001286837 | 89.57097344 | 6.006339675 | 5.40E-07    | 14.91273859 |
| ZNF142       | NR_073600    | 60.32932513 | 7.60957996  | 0.000481699 | 7.928075589 |
| SSR3         | NM_007107    | 105.066099  | 6.185164233 | 1.27E-08    | 16.9867921  |
| ZNF431       | NM_133473    | 43.03688397 | 0.902574993 | 6.48E-05    | 47.68233589 |
| EIF2B2       | NM_014239    | 58.5320095  | 12.71484541 | 0.004917684 | 4.603438549 |
| ALG11        | NR_036571    | 69.60691528 | 3.684602763 | 8.53E-06    | 18.89129433 |
| TCEANC       | NM_001297564 | 31.03896394 | 1.332979351 | 0.00479741  | 23.28540491 |
| ANKRD10      | NM_017664    | 126.3416091 | 9.334734263 | 5.09E-09    | 13.53456945 |
| HS2ST1       | NM_001134492 | 111.2836343 | 2.208352479 | 4.65E-10    | 50.39215223 |
| MRPL21       | NM_181514    | 99.33442714 | 10.29054116 | 3.65E-07    | 9.652983799 |
| PTPRK        | NM_002844    | 72.71568297 | 1.031086946 | 2.71E-07    | 70.52332808 |
| MRPL12       | NM_002949    | 164.4724099 | 24.31119281 | 7.93E-09    | 6.765295769 |
| RPL9         | NM_000661    | 109.9721823 | 20.49670494 | 1.39E-05    | 5.365359095 |
| METTL21A     | NM_145280    | 96.66281017 | 5.376729351 | 8.13E-08    | 17.9779944  |
| SLC36A4      | NM_152313    | 83.35343807 | 1.269457204 | 4.28E-08    | 65.6606917  |
| TOP1         | NM_003286    | 82.91628738 | 2.05789323  | 1.50E-07    | 40.29183155 |
| HECTD2       | NM_001284274 | 77.57305339 | 2.393223862 | 6.24E-07    | 32.4136219  |
| ADAM9        | NR_027638    | 42.59973328 | 3.040344133 | 0.001147826 | 14.01148404 |
| CAMTA2       | NM_015099    | 86.02505507 | 18.52449917 | 0.000376683 | 4.643853217 |
| SLC27A4      | NM_005094    | 73.15283366 | 14.25417496 | 0.000377828 | 5.132028608 |
| CCDC127      | NM_145265    | 57.65770813 | 2.955350205 | 7.84E-05    | 19.50960263 |
| ZNF837       | NM_138466    | 117.9383204 | 16.67657887 | 9.47E-07    | 7.072093221 |
| MAP3K3       | NM_002401    | 97.97426223 | 7.793818227 | 4.61E-07    | 12.57076562 |
| RAET1E-AS1   | NR_045126    | 72.71568297 | 8.502087822 | 7.03E-05    | 8.552685469 |
| AHI1         | NM_001134831 | 76.69875203 | 2.826444888 | 8.52E-07    | 27.13612155 |
| NSRP1        | NM_032141    | 64.31239418 | 5.83697493  | 5.07E-05    | 11.01810355 |
| ATRN         | NM_139322    | 72.71568297 | 3.495968387 | 2.77E-06    | 20.79986857 |
| AIF1L        | NM_031426    | 109.9234694 | 12.93193455 | 6.36E-07    | 8.500156641 |
| CHRNA7       | NM_001190455 | 109.049168  | 0.369229202 | 1.66E-12    | 295.3427504 |
| CEP76        | NR_073537    | 97.09996085 | 2.999912617 | 3.29E-09    | 32.36759641 |
| NOL12        | NM_024313    | 138.3395291 | 27.78167281 | 3.04E-06    | 4.979524815 |
| PLEKHM1      | NR_027782    | 160.9752043 | 35.51172222 | 7.04E-07    | 4.53301598  |
| CEP57        | NM_014679    | 76.69875203 | 0.745259011 | 3.00E-09    | 102.9155647 |
| DNAJB6       | NM_058246    | 77.13590271 | 7.269870448 | 2.40E-05    | 10.61035451 |
| RBBP5        | NM_001193273 | 82.4791367  | 3.988468495 | 7.77E-07    | 20.67940033 |
| ARHGAP26     | NM_015071    | 38.56795136 | 3.730092834 | 0.004055128 | 10.339676   |
| GRAMD1A      | NM_001136199 | 73.15283366 | 14.18302336 | 0.000401783 | 5.157774318 |
| NFIC         | NM_005597    | 105.9404003 | 14.54998481 | 1.77E-06    | 7.281134771 |
| SNUPN        | NM_001042588 | 48.76855577 | 6.980830161 | 0.004574145 | 6.986068225 |
| JHDM1D-AS1   | NR_024451    | 41.23956835 | 3.61453901  | 0.00355948  | 11.40935766 |
| ATG101       | NM_001098673 | 94.86549455 | 8.348730016 | 3.91E-07    | 11.36286529 |
| PARN         | NM_001134477 | 125.9044585 | 3.518477171 | 3.05E-11    | 35.78379292 |
| ASNS         | NM_183356    | 101.5201806 | 2.286848471 | 9.00E-11    | 44.39305092 |
| CTPS1        | NR_125440    | 70.04406598 | 12.05021442 | 0.000232789 | 5.812682125 |
| LOC100131691 | NR_027334    | 116.6268684 | 24.85253412 | 1.15E-05    | 4.692755588 |
| AURKB        | NM_001284526 | 143.1968996 | 27.61489025 | 8.11E-07    | 5.185495879 |
| C2orf76      | NM_001017927 | 74.95014928 | 1.754990311 | 6.63E-07    | 42.70687354 |
| PHF12        | NM_001033561 | 83.79058876 | 7.103653344 | 6.50E-06    | 11.79542198 |

|               |              |             |             |             |             |
|---------------|--------------|-------------|-------------|-------------|-------------|
| ZDHC2         | NM_016353    | 77.13590271 | 1.048329685 | 1.83E-07    | 73.57981348 |
| KIAA0100      | NM_014680    | 118.8126218 | 10.51174213 | 1.56E-08    | 11.30284784 |
| TMEM165       | NR_073070    | 109.9721823 | 4.705099802 | 2.30E-09    | 23.37297548 |
| RPLP1         | NM_001003    | 199.4944428 | 36.10524082 | 4.64E-09    | 5.525359706 |
| RPTOR         | NM_020761    | 107.3005653 | 10.30802422 | 3.07E-07    | 10.40942114 |
| TRMT5         | NM_020810    | 69.60691528 | 5.772735427 | 3.33E-05    | 12.0578738  |
| HAP1          | NM_177977    | 187.059372  | 16.14135114 | 6.67E-13    | 11.58882986 |
| HNRNPAB       | NM_004499    | 203.0403612 | 36.91107373 | 1.36E-09    | 5.500798019 |
| NDUFS1        | NM_001199982 | 41.67671904 | 1.14694738  | 0.000541569 | 36.33708029 |
| CD59          | NM_203330    | 133.8705966 | 7.373708373 | 1.12E-10    | 18.15512492 |
| SUMO1         | NM_001005781 | 129.8875276 | 4.425638205 | 2.31E-11    | 29.34888067 |
| STAG2         | NM_001282418 | 49.20570646 | 1.228425929 | 3.65E-05    | 40.05590023 |
| BBS7          | NM_176824    | 54.11178977 | 0.738757872 | 2.43E-06    | 73.24698905 |
| SNRNP200      | NM_014014    | 137.4165149 | 9.434083185 | 4.17E-10    | 14.56596388 |
| ERICH1        | NM_207332    | 87.33650713 | 2.566793195 | 3.65E-08    | 34.02553322 |
| NUBP1         | NM_001278506 | 75.82445064 | 6.739236384 | 1.48E-05    | 11.25119321 |
| NSMAF         | NM_003580    | 144.5083517 | 2.876624961 | 1.16E-13    | 50.23538128 |
| SLMO2-ATP5E   | NR_037930    | 79.37036901 | 12.60859561 | 0.000104223 | 6.294941283 |
| NOTCH2NL      | NM_203458    | 171.1270958 | 5.246649109 | 1.13E-14    | 32.61645524 |
| PRDX1         | NM_181696    | 139.6509813 | 16.55850882 | 7.78E-09    | 8.433789708 |
| SMARCA4       | NM_001128849 | 127.2159105 | 10.99365063 | 5.64E-09    | 11.57176218 |
| UEVLD         | NM_001040697 | 109.049168  | 2.722041698 | 3.23E-10    | 40.06153472 |
| BCL2L2-PABPN1 | NM_001199864 | 65.62384623 | 13.33734413 | 0.001668642 | 4.92030839  |
| SH2D4A        | NM_001174160 | 84.22773945 | 1.841218025 | 1.21E-07    | 45.74566309 |
| MAP3K8        | NM_005204    | 59.40631088 | 3.374684532 | 1.62E-05    | 17.60351532 |
| CHKA          | NM_212469    | 102.8316327 | 6.495034957 | 2.38E-08    | 15.83234476 |
| RNF103        | NM_001198951 | 76.69875203 | 7.050943337 | 1.31E-05    | 10.87780008 |
| OCIAD2        | NM_001286774 | 76.69875203 | 3.074196168 | 1.67E-07    | 24.94920553 |
| KAT6A         | NM_001099413 | 85.10204081 | 2.694580679 | 1.10E-07    | 31.58266571 |
| ZNF600        | NM_198457    | 49.20570646 | 1.723982735 | 0.00011435  | 28.54187891 |
| MAP3K14-AS1   | NR_110326    | 79.37036901 | 17.97171302 | 0.000981526 | 4.41640532  |
| RAD51D        | NR_037711    | 75.82445064 | 3.289894783 | 1.15E-06    | 23.04768257 |
| CKAP5         | NM_001008938 | 100.2087285 | 4.251347288 | 4.28E-08    | 23.57105213 |
| NDUFV3        | NM_001001503 | 124.1558557 | 3.467874738 | 7.23E-12    | 35.80171289 |
| BSDC1         | NM_001300958 | 88.2108085  | 9.919809018 | 7.85E-06    | 8.892389797 |
| ZNF646        | NM_014699    | 136.9793643 | 16.78057838 | 3.47E-08    | 8.162970379 |
| SOD2          | NM_001024465 | 111.7207851 | 7.206891275 | 3.98E-09    | 15.50193846 |
| NUDT12        | NM_001300741 | 69.1697646  | 2.017090357 | 3.48E-07    | 34.29185229 |
| RPSA          | NM_002295    | 157.3805731 | 14.00251078 | 7.99E-11    | 11.23945381 |
| MTO1          | NM_012123    | 73.15283366 | 1.961275558 | 4.34E-07    | 37.29860057 |
| RDH11         | NM_001252650 | 79.8075197  | 7.792447937 | 7.31E-06    | 10.2416494  |
| SYNJ1         | NM_003895    | 63.43809281 | 1.769511941 | 1.25E-05    | 35.85061584 |
| AK3           | NM_016282    | 123.2328415 | 4.625444407 | 9.05E-11    | 26.64237868 |
| MINA          | NM_153182    | 118.8126218 | 1.763275186 | 1.35E-12    | 67.38178062 |
| MBD3          | NM_001281453 | 198.5714286 | 28.00055494 | 4.03E-11    | 7.091696181 |
| LATS1         | NM_004690    | 147.1799686 | 3.606475674 | 5.73E-13    | 40.80991581 |
| KIAA1586      | NM_001286276 | 105.066099  | 2.901355198 | 3.87E-11    | 36.21276673 |
| ABCD4         | NM_005050    | 71.40423091 | 14.1340221  | 0.000597704 | 5.05193995  |
| TEX22         | NM_001195082 | 126.3416091 | 17.10548589 | 2.16E-07    | 7.386028666 |
| SAFB          | NM_002967    | 82.91628738 | 8.649891109 | 6.97E-06    | 9.585818635 |
| FAM161A       | NM_032180    | 69.60691528 | 4.843246925 | 1.79E-05    | 14.37195261 |
| UBL7          | NM_201265    | 104.1917976 | 10.70050882 | 2.66E-07    | 9.737088148 |
| ADI1          | NM_018269    | 107.3005653 | 4.469991743 | 1.13E-09    | 24.00464507 |
| WDR5          | NM_017588    | 113.4693878 | 11.32494183 | 4.22E-08    | 10.01942345 |
| EZR           | NM_001111077 | 155.5832575 | 17.28962571 | 7.16E-10    | 8.998648097 |
| CDC6          | NM_001254    | 106.4262639 | 10.77292157 | 5.84E-07    | 9.879053069 |
| GLCCI1        | NM_138426    | 104.6289483 | 1.384232315 | 6.88E-10    | 75.58626334 |
| AGRN          | NM_198576    | 93.99119317 | 20.46878148 | 0.000105905 | 4.591929092 |
| RPP25L        | NM_148179    | 153.8346547 | 37.17692069 | 1.08E-05    | 4.137907387 |
| SNX1          | NM_003099    | 49.20570646 | 6.388617989 | 0.001527519 | 7.702089332 |
| RAPGEF6       | NM_016340    | 61.64077717 | 2.056465166 | 1.68E-05    | 29.97414116 |
| TRMT10A       | NM_152292    | 33.27343024 | 0.492907265 | 0.000138016 | 67.50444274 |

|              |              |             |             |             |             |
|--------------|--------------|-------------|-------------|-------------|-------------|
| PAK4         | NM_005884    | 87.33650713 | 11.06764286 | 1.01E-05    | 7.891156973 |
| ERVMER34-1   | NM_001242690 | 47.45710371 | 1.536539304 | 2.46E-05    | 30.88570763 |
| ZCWPW1       | NM_017984    | 98.89727652 | 4.630500965 | 1.44E-08    | 21.35779201 |
| MFGE8        | NM_001114614 | 110.8464837 | 17.50582391 | 3.18E-06    | 6.331977531 |
| ACBD3        | NM_022735    | 61.2036265  | 5.905177246 | 0.00014369  | 10.36440126 |
| CDCA7L       | NM_001127371 | 127.7017741 | 3.938131819 | 3.51E-11    | 32.4269933  |
| FOXM1        | NM_001243088 | 148.05427   | 7.024259554 | 1.41E-12    | 21.07756254 |
| ALOX15P1     | NR_045985    | 44.78548671 | 4.549854197 | 0.001697852 | 9.843279537 |
| EP300        | NM_001429    | 83.35343807 | 5.443025423 | 1.54E-06    | 15.31380649 |
| RNF216       | NM_207116    | 68.29546324 | 5.994119506 | 3.27E-05    | 11.39374401 |
| TIFA         | NM_052864    | 125.0673077 | 6.367979958 | 2.24E-10    | 19.70284275 |
| VPS26A       | NM_001035260 | 109.049168  | 3.93984046  | 3.47E-09    | 27.67857459 |
| DNM2         | NM_004945    | 139.6509813 | 10.40634225 | 6.37E-10    | 13.41979515 |
| PPM1B        | NM_002706    | 70.91836734 | 4.444242115 | 1.38E-05    | 15.9573591  |
| RWDD3        | NR_103484    | 95.30264523 | 3.690485593 | 8.06E-09    | 25.82387678 |
| EIF4ENIF1    | NM_019843    | 51.00302207 | 5.995040547 | 0.00085892  | 8.507535799 |
| RPAP3        | NM_001146076 | 100.6458792 | 3.261462259 | 2.11E-09    | 30.85912735 |
| FAM219A      | NM_001184943 | 79.8075197  | 7.886010995 | 1.30E-05    | 10.12013802 |
| IRS2         | NM_003749    | 92.19387756 | 3.536555646 | 8.85E-08    | 26.06883272 |
| KDELR1       | NM_006801    | 116.5781554 | 16.68191741 | 5.87E-07    | 6.988294724 |
| ATF7IP2      | NR_045816    | 49.69157001 | 0.317594952 | 1.06E-05    | 156.4620903 |
| SH3TC2       | NM_024577    | 43.91118534 | 2.541664844 | 0.001067029 | 17.27654433 |
| HIST1H2BK    | NM_080593    | 44.78548671 | 5.903627531 | 0.004803848 | 7.586096257 |
| CCSER1       | NM_001145065 | 71.40423091 | 0.992253297 | 3.11E-07    | 71.96169681 |
| NARF         | NM_012336    | 132.1707067 | 14.06133355 | 8.38E-09    | 9.399585482 |
| CDKN2AIPNL   | NM_080656    | 122.3585401 | 13.19355615 | 4.22E-08    | 9.274113717 |
| PDE7A        | NM_001242318 | 79.8075197  | 1.980916856 | 3.31E-07    | 40.28817236 |
| MSH4         | NM_002440    | 83.79058876 | 2.335603875 | 1.84E-07    | 35.87534241 |
| ZNF783       | NM_001195220 | 43.47403467 | 3.934242769 | 0.003553981 | 11.05016574 |
| VAX2         | NM_012476    | 76.26160134 | 8.01097424  | 1.86E-05    | 9.519641314 |
| EIF2B3       | NM_001261418 | 37.2564993  | 3.840363576 | 0.003897349 | 9.701294828 |
| ADCK1        | NM_020421    | 44.39704891 | 1.591975063 | 0.000581265 | 27.88803037 |
| DEPDC5       | NM_001242897 | 61.2036265  | 2.978915024 | 3.15E-05    | 20.54561006 |
| TPTE2P5      | NR_038258    | 43.03688397 | 0.657204004 | 0.000106253 | 65.48481706 |
| DDX31        | NM_022779    | 101.0830299 | 5.78756249  | 4.28E-08    | 17.46556173 |
| MCU          | NM_001270679 | 114.8295527 | 3.275087466 | 3.29E-10    | 35.06152245 |
| DHCR24       | NM_014762    | 115.2667034 | 10.11156236 | 5.52E-08    | 11.39949488 |
| TRIM36       | NM_001300759 | 37.2564993  | 2.063219368 | 0.003037408 | 18.05745908 |
| IFT74        | NM_001099223 | 71.8413816  | 0.901917052 | 1.10E-07    | 79.65408949 |
| MRPL36       | NM_032479    | 79.37036901 | 17.86802513 | 0.002045189 | 4.442033658 |
| LRP11        | NM_032832    | 68.29546324 | 5.962391431 | 2.49E-05    | 11.45437431 |
| PTPN13       | NM_080684    | 56.34625608 | 2.261445877 | 5.87E-05    | 24.91603122 |
| MAD2L2       | NM_006341    | 80.68182108 | 16.51749727 | 0.000546481 | 4.884627481 |
| TMEM219      | NM_194280    | 83.79058876 | 7.604681623 | 8.75E-06    | 11.01829017 |
| ZMYM6NB      | NM_001195156 | 114.8295527 | 21.4818523  | 8.39E-06    | 5.345421387 |
| MTMR14       | NM_001077526 | 69.60691528 | 8.340924357 | 0.000120203 | 8.345227975 |
| IKKBK        | NR_040009    | 52.31447414 | 7.478989857 | 0.003078561 | 6.994858282 |
| TBC1D31      | NM_145647    | 129.4990898 | 4.077262201 | 8.12E-11    | 31.76128574 |
| TOPORS       | NM_001195622 | 58.09485881 | 0.131361377 | 3.86E-08    | 442.2522069 |
| PTPLAD1      | NM_016395    | 83.35343807 | 4.053200254 | 9.93E-07    | 20.56484577 |
| ZNF567       | NM_001300979 | 71.8413816  | 1.928322103 | 6.88E-07    | 37.25590319 |
| PARK7        | NM_007262    | 140.0881319 | 8.457562996 | 1.28E-10    | 16.5636522  |
| TIMM23       | NM_006327    | 68.73261391 | 4.533638277 | 1.80E-05    | 15.1605862  |
| LOC100996437 | NR_110037    | 144.071201  | 11.27732933 | 2.46E-10    | 12.77529429 |
| MAPK8IP3     | NM_001040439 | 98.41141291 | 13.88290849 | 7.81E-06    | 7.088674032 |
| HSPB8        | NM_014365    | 38.13080067 | 1.274931376 | 0.00128108  | 29.90812006 |
| AKAP9        | NM_147185    | 56.78340675 | 2.014214638 | 5.49E-05    | 28.19133853 |
| PPFIBP1      | NM_177444    | 76.26160134 | 3.367344029 | 8.43E-07    | 22.64740421 |
| SLC13A5      | NM_001143838 | 43.91118534 | 5.724926775 | 0.004186456 | 7.670174147 |
| PTP4A1       | NM_003463    | 97.09996085 | 17.58904434 | 3.78E-05    | 5.520479624 |
| ASB3         | NM_016115    | 41.23956835 | 3.633458832 | 0.002137766 | 11.34994788 |
| TM2D2        | NM_001024380 | 54.54894044 | 0.738452292 | 6.56E-07    | 73.86928175 |

|           |              |             |             |             |             |
|-----------|--------------|-------------|-------------|-------------|-------------|
| RPS20     | NM_001146227 | 182.2020017 | 25.42490115 | 3.69E-10    | 7.166281617 |
| H1FX-AS1  | NR_026991    | 147.1799686 | 18.99704468 | 1.18E-08    | 7.747519215 |
| SPTLC1    | NM_006415    | 83.79058876 | 5.080933376 | 1.49E-06    | 16.49118037 |
| KCNK1     | NM_002245    | 113.0322371 | 3.175781219 | 1.11E-10    | 35.59194708 |
| RBMX      | NM_001164803 | 69.60691528 | 7.997390811 | 5.70E-05    | 8.703703112 |
| DHRS12    | NM_001031719 | 100.6458792 | 6.767575281 | 1.51E-07    | 14.8717783  |
| DEF8      | NM_001242822 | 87.33650713 | 19.75152435 | 0.000444336 | 4.421760344 |
| RUFY1     | NM_025158    | 208.772033  | 11.19517228 | 5.03E-16    | 18.64839841 |
| DHX35     | NM_001190809 | 86.46220574 | 1.829297519 | 5.79E-08    | 47.26525065 |
| ADNP-AS1  | NR_110009    | 88.2108085  | 8.701860464 | 4.01E-06    | 10.13700563 |
| FLT3      | NM_004119    | 31.47611462 | 1.230041428 | 0.001904198 | 25.5894752  |
| CSPP1     | NM_024790    | 100.2087285 | 4.234668931 | 4.75E-08    | 23.66388735 |
| NME1      | NM_000269    | 134.7936109 | 16.51155834 | 1.59E-08    | 8.163591107 |
| LEO1      | NM_001286430 | 116.1410048 | 4.205626153 | 3.23E-10    | 27.61562738 |
| RNF8      | NM_183078    | 119.6869232 | 5.092475306 | 3.07E-10    | 23.50270075 |
| EFTUD1    | NM_001040610 | 68.73261391 | 1.840634093 | 4.05E-06    | 37.3418129  |
| EXOC1     | NM_001024924 | 82.4791367  | 2.590030829 | 1.06E-07    | 31.84484747 |
| CCDC43    | NM_144609    | 83.79058876 | 0.889599487 | 3.21E-10    | 94.18911544 |
| SMARCAD1  | NM_001128429 | 59.40631088 | 2.649556674 | 2.59E-05    | 22.42122671 |
| KAT2A     | NM_021078    | 112.5950864 | 26.32134471 | 5.12E-05    | 4.277710262 |
| ANO10     | NM_018075    | 63.82653061 | 1.628065397 | 1.66E-05    | 39.20391081 |
| C11orf65  | NM_152587    | 82.91628738 | 1.758060352 | 1.18E-07    | 47.16350452 |
| TERF1     | NM_017489    | 90.00812411 | 1.36403878  | 2.84E-09    | 65.98648472 |
| TMEM161B  | NM_001289008 | 53.67463907 | 2.947118517 | 9.04E-05    | 18.21258248 |
| ARPC1B    | NM_005720    | 125.9044585 | 21.82512315 | 1.00E-06    | 5.768785707 |
| FAM160A2  | NM_032127    | 67.85831254 | 5.945287278 | 1.77E-05    | 11.41379876 |
| DPYSL5    | NM_001253723 | 76.69875203 | 5.820158305 | 5.31E-06    | 13.17812128 |
| UGGT1     | NM_020120    | 55.4719547  | 2.130185895 | 9.12E-05    | 26.04089851 |
| LOC255187 | NR_122044    | 37.2564993  | 4.026977767 | 0.003528359 | 9.251727091 |
| FAM86B1   | NR_003494    | 52.31447414 | 4.059035153 | 0.000380534 | 12.88840135 |
| XBP1      | NM_005080    | 116.1410048 | 17.02485521 | 9.44E-07    | 6.821849778 |
| DNAJC21   | NM_194283    | 71.8413816  | 4.142836701 | 8.57E-06    | 17.34110871 |
| IL27RA    | NM_004843    | 72.27853228 | 6.924312042 | 4.42E-05    | 10.43837017 |
| FKBP9     | NM_007270    | 105.5519625 | 4.683830448 | 8.02E-09    | 22.53539355 |
| EIF5      | NM_001969    | 101.5201806 | 22.15905068 | 0.000101532 | 4.581431852 |
| FECH      | NM_000140    | 58.96916018 | 2.25863844  | 1.64E-05    | 26.10827795 |
| ZBTB37    | NM_001122770 | 93.99119317 | 6.449295603 | 2.55E-07    | 14.57386961 |
| POLDIP2   | NM_001290145 | 79.37036901 | 12.32730389 | 8.60E-05    | 6.43858298  |
| CCNI      | NM_006835    | 68.29546324 | 7.805076468 | 9.74E-05    | 8.750133778 |
| NOTCH1    | NM_017617    | 136.9793643 | 19.52845586 | 6.21E-08    | 7.014346924 |
| PPP1R21   | NM_001135629 | 83.79058876 | 1.059378443 | 5.45E-08    | 79.094104   |
| ORC6      | NR_037620    | 143.6340504 | 2.686657507 | 3.47E-15    | 53.46198762 |
| FAM111B   | NM_001142704 | 47.8942544  | 3.072691299 | 0.00018071  | 15.58707001 |
| FASTKD3   | NR_036553    | 40.80241766 | 0.813006467 | 0.000186642 | 50.18707639 |
| ZNF451    | NM_001257273 | 58.09485881 | 6.559855181 | 0.000769822 | 8.856119108 |
| FAM45A    | NM_207009    | 154.2718054 | 6.068239157 | 1.02E-12    | 25.42282883 |
| ATXN7L1   | NM_020725    | 69.60691528 | 5.410945779 | 3.39E-05    | 12.86409403 |
| CORO1C    | NM_001276471 | 68.73261391 | 3.622585787 | 4.45E-06    | 18.97335714 |
| GMPR      | NM_006877    | 87.33650713 | 5.122956913 | 3.80E-07    | 17.04806591 |
| RBM23     | NM_018107    | 95.73979591 | 7.348651038 | 1.63E-07    | 13.02821367 |
| KIAA0226  | NM_014687    | 51.00302207 | 6.89355819  | 0.000910415 | 7.398649676 |
| EDRF1     | NR_110859    | 54.11178977 | 6.475185727 | 0.000479688 | 8.356793465 |
| PELI3     | NM_001243136 | 73.58998434 | 17.60108399 | 0.001998171 | 4.180991602 |
| DNA2      | NR_102264    | 47.01995303 | 4.316469687 | 0.00258865  | 10.89315029 |
| TCTN1     | NM_024549    | 73.15283366 | 4.733560389 | 5.77E-06    | 15.45408269 |
| FASN      | NM_004104    | 227.8617898 | 40.47028657 | 4.04E-11    | 5.630347822 |
| GNE       | NM_005476    | 89.57097344 | 4.684589759 | 3.00E-07    | 19.12034523 |
| PRRG1     | NM_000950    | 42.55102041 | 0.787736402 | 0.00010811  | 54.01682635 |
| ZNF322    | NM_001242798 | 48.81726865 | 4.864549187 | 0.001218342 | 10.03531196 |
| CEP70     | NM_001288966 | 47.01995303 | 2.446094866 | 0.000590465 | 19.22245685 |
| ZSCAN20   | NM_145238    | 55.86039251 | 4.26499376  | 0.0001784   | 13.09741483 |
| ARFIP1    | NM_001025593 | 82.4791367  | 3.588005202 | 2.35E-07    | 22.98746297 |

|              |              |             |             |             |             |
|--------------|--------------|-------------|-------------|-------------|-------------|
| UGP2         | NM_001001521 | 97.97426223 | 3.976693935 | 4.54E-08    | 24.6371141  |
| RFX2         | NM_000635    | 48.76855577 | 6.553172418 | 0.001673134 | 7.441976596 |
| TSGA10       | NM_025244    | 47.8942544  | 3.566767972 | 0.000365383 | 13.42791423 |
| FITM2        | NM_001080472 | 43.91118534 | 3.139385651 | 0.000879024 | 13.98719056 |
| CEBPA        | NM_004364    | 197.6971272 | 30.65291005 | 5.52E-10    | 6.44953862  |
| KLF5         | NM_001730    | 56.29754319 | 6.181219717 | 0.000192131 | 9.107837251 |
| RPGR         | NM_000328    | 26.6187442  | 0.341718155 | 0.004232265 | 77.89678074 |
| ABHD6        | NM_020676    | 73.15283366 | 4.013535167 | 6.97E-06    | 18.22653362 |
| TEX264       | NR_103463    | 106.8634146 | 12.26801057 | 1.20E-06    | 8.710737084 |
| FOXRED2      | NM_001102371 | 121.9213894 | 12.86587716 | 2.93E-08    | 9.476337133 |
| PYGO2        | NM_138300    | 157.3805731 | 25.71901335 | 2.86E-08    | 6.119230587 |
| ZFAND1       | NR_033193    | 107.737716  | 3.642576942 | 6.05E-10    | 29.57733432 |
| CDNF         | NM_001029954 | 49.20570646 | 1.431580051 | 7.92E-05    | 34.37160669 |
| SPNS1        | NM_001142448 | 58.96916018 | 12.16260712 | 0.00346772  | 4.848398014 |
| C10orf88     | NM_024942    | 108.6120173 | 7.904782065 | 1.98E-08    | 13.74003944 |
| BCAS2        | NM_005872    | 56.78340675 | 3.602785275 | 0.000102753 | 15.76097448 |
| UBE2K        | NM_001111112 | 100.6458792 | 5.103012653 | 4.25E-08    | 19.72283552 |
| LUC7L3       | NM_006107    | 113.08095   | 8.125849561 | 8.69E-09    | 13.91620028 |
| UPK3A        | NM_006953    | 61.64077717 | 12.26223466 | 0.002191058 | 5.026879592 |
| SMAD5        | NM_005903    | 98.41141291 | 3.153194467 | 4.59E-09    | 31.21006774 |
| RPS13        | NM_001017    | 168.0183282 | 27.30088925 | 2.01E-08    | 6.154317049 |
| PCMTD2       | NM_018257    | 144.5083517 | 4.365654252 | 1.01E-13    | 33.1011902  |
| ZNF14        | NM_021030    | 40.36526697 | 0.951322545 | 0.000625058 | 42.43068472 |
| MRE11A       | NM_005590    | 36.8193486  | 2.172234485 | 0.003464077 | 16.94998807 |
| FAM154B      | NM_001008226 | 72.27853228 | 6.58145135  | 4.42E-05    | 10.98215704 |
| GALNT10      | NM_198321    | 123.6699922 | 2.877435154 | 5.45E-11    | 42.97924562 |
| RTF1         | NM_015138    | 115.7038541 | 5.219929882 | 1.81E-09    | 22.16578704 |
| YAF2         | NR_034000    | 63.82653061 | 0.867708365 | 6.16E-07    | 73.5575836  |
| PXYLP1       | NM_152282    | 56.29754319 | 7.101819547 | 0.001070546 | 7.927199898 |
| IP6K1        | NM_153273    | 118.375471  | 4.371291367 | 7.94E-10    | 27.08020607 |
| ACP6         | NM_016361    | 59.40631088 | 5.502675223 | 0.000109536 | 10.79589626 |
| KAT6B        | NM_001256468 | 40.80241766 | 3.696110509 | 0.002218359 | 11.0392851  |
| UHRF1BP1     | NM_017754    | 186.6222214 | 4.846317748 | 5.02E-16    | 38.5080449  |
| TMEM161B-AS1 | NR_039994    | 59.84346156 | 1.101024985 | 2.52E-06    | 54.35250098 |
| MSRB3        | NM_198080    | 52.31447414 | 2.441342195 | 0.000195415 | 21.42857083 |
| FAM134C      | NM_178126    | 86.02505507 | 7.323027728 | 2.91E-06    | 11.74719778 |
| NPHP4        | NM_015102    | 54.11178977 | 5.461442344 | 0.000543759 | 9.907966863 |
| ARHGEF10L    | NM_018125    | 80.2446704  | 9.221607143 | 1.57E-05    | 8.701809691 |
| PHACTR2      | NM_001100164 | 40.80241766 | 2.617689088 | 0.002128078 | 15.58719018 |
| LEPROTL1     | NM_015344    | 97.53711154 | 4.284327052 | 5.18E-09    | 22.76602844 |
| PHKG2        | NM_001172432 | 79.37036901 | 19.53964204 | 0.00086725  | 4.062017556 |
| MTPN         | NM_145808    | 58.5320095  | 0.296216602 | 2.40E-07    | 197.5986798 |
| ZNF589       | NM_016089    | 93.11689181 | 5.448110315 | 6.91E-08    | 17.09159441 |
| NAE1         | NM_001286500 | 140.0881319 | 4.49953519  | 1.18E-12    | 31.13391184 |
| PAICS        | NM_001079525 | 64.74954487 | 5.543333367 | 3.34E-05    | 11.68061536 |
| HEBP1        | NM_015987    | 58.5320095  | 4.791918426 | 0.000197293 | 12.21473412 |
| UBE2J2       | NM_194315    | 94.42834386 | 22.01600863 | 0.000231955 | 4.289076438 |
| UBE2A        | NM_003336    | 54.98609113 | 4.925074134 | 0.000194762 | 11.1645205  |
| NIT2         | NM_020202    | 97.53711154 | 5.951559351 | 1.46E-07    | 16.38849683 |
| DUSP4        | NM_001394    | 91.31957618 | 9.023667756 | 2.85E-06    | 10.12000648 |
| C12orf49     | NM_024738    | 149.8515857 | 5.781200753 | 1.20E-12    | 25.92049508 |
| BTAF1        | NM_003972    | 86.89935644 | 2.355641633 | 9.40E-08    | 36.88988819 |
| U2AF2        | NM_007279    | 128.5760755 | 23.15916822 | 1.79E-06    | 5.551843414 |
| KNOP1        | NM_001012991 | 69.1697646  | 10.81498843 | 0.000254987 | 6.395731726 |
| PLBD2        | NM_001159727 | 74.95014928 | 9.228106577 | 3.45E-05    | 8.121942313 |
| PCYOX1L      | NM_001301054 | 87.33650713 | 16.04549205 | 6.21E-05    | 5.44305571  |
| TRAPPC3      | NR_073097    | 77.1846156  | 4.86037926  | 1.04E-06    | 15.88036889 |
| SLC35C2      | NM_001281460 | 134.744898  | 12.35048531 | 1.76E-09    | 10.91008933 |
| USP39        | NM_001256726 | 103.754647  | 7.41823609  | 8.92E-08    | 13.98643097 |
| LINC00910    | NR_027412    | 127.7030394 | 9.569883291 | 1.28E-09    | 13.34426299 |
| PXK          | NM_001289100 | 53.18877551 | 4.341185013 | 0.000509777 | 12.25213285 |
| ELF2         | NM_001276458 | 98.41141291 | 6.465021585 | 2.14E-07    | 15.22213215 |

|                       |              |             |             |             |             |
|-----------------------|--------------|-------------|-------------|-------------|-------------|
| FNDC3B                | NM_022763    | 145.8685166 | 3.372652275 | 6.26E-13    | 43.25038715 |
| TUBB3                 | NM_006086    | 231.8448589 | 39.05292919 | 3.58E-11    | 5.936682949 |
| CD83                  | NM_004233    | 77.13590271 | 0.903733374 | 7.87E-09    | 85.35249993 |
| WAC                   | NM_100486    | 84.22773945 | 4.313689678 | 1.44E-06    | 19.52568352 |
| SREK1                 | NM_139168    | 77.13590271 | 2.377390033 | 2.67E-07    | 32.44562383 |
| RBMS1                 | NM_002897    | 65.62384623 | 2.549022095 | 9.58E-06    | 25.74471455 |
| TBP                   | NM_001172085 | 77.13590271 | 4.003969476 | 1.36E-06    | 19.26485783 |
| TUBGCP2               | NM_001256618 | 87.33650713 | 4.629669635 | 2.12E-07    | 18.86452253 |
| IQGAP1                | NM_003870    | 105.9404003 | 4.729755936 | 1.45E-08    | 22.3987034  |
| APBA3                 | NM_004886    | 117.9383204 | 12.90395197 | 1.60E-07    | 9.139705471 |
| ARRDC3                | NM_020801    | 56.78340675 | 11.15263445 | 0.002535935 | 5.09147924  |
| ZFX                   | NM_001178085 | 95.73979591 | 2.544044982 | 5.02E-09    | 37.63290216 |
| ABHD12                | NM_001042472 | 47.45710371 | 5.360365607 | 0.001614313 | 8.853333372 |
| WDR4                  | NR_048535    | 114.8295527 | 13.34954242 | 2.32E-07    | 8.601759453 |
| ZNF107                | NM_001013746 | 88.2108085  | 3.15959813  | 3.04E-08    | 27.91836331 |
| MTRF1L                | NM_001114184 | 97.09996085 | 9.717125954 | 8.15E-07    | 9.992662574 |
| PMS1                  | NR_110332    | 157.3805731 | 3.080300905 | 1.41E-14    | 51.09259712 |
| SLC35D2               | NR_104627    | 97.97426223 | 5.486699887 | 7.31E-08    | 17.8566833  |
| PRDM11                | NM_001256696 | 70.96708023 | 7.45574819  | 7.30E-05    | 9.518438447 |
| ZMYND11               | NM_001202464 | 127.6530613 | 1.436916491 | 3.61E-12    | 88.83819075 |
| CEP95                 | NM_138363    | 174.2358636 | 10.77597684 | 2.28E-13    | 16.16891594 |
| NBN                   | NM_002485    | 149.414435  | 2.017148203 | 8.16E-15    | 74.07211568 |
| CXorf40A              | NM_001171907 | 54.98609113 | 6.875603268 | 0.000770447 | 7.997275146 |
| DST                   | NM_001144769 | 86.02505507 | 2.315499898 | 1.58E-07    | 37.15182848 |
| UBAC1                 | NM_016172    | 94.86549455 | 8.124700517 | 5.08E-07    | 11.67618355 |
| BAX                   | NM_001291431 | 140.0881319 | 31.22316532 | 4.91E-06    | 4.486672972 |
| ASH1L                 | NM_018489    | 51.44017277 | 3.770852098 | 0.000207422 | 13.64152489 |
| BARD1                 | NR_104212    | 86.89935644 | 1.715266707 | 5.92E-08    | 50.66229998 |
| PKIB                  | NM_181794    | 48.76855577 | 0.800414298 | 3.83E-05    | 60.92914117 |
| PCMT1                 | NM_001252051 | 81.60483533 | 4.02238553  | 1.17E-06    | 20.28767126 |
| UBE2R2                | NM_017811    | 101.5201806 | 7.148409349 | 1.60E-07    | 14.20178611 |
| GALNT11               | NM_022087    | 84.66489013 | 3.465402552 | 1.11E-07    | 24.43147336 |
| UBLCP1                | NM_145049    | 97.09996085 | 5.829856258 | 1.60E-07    | 16.6556355  |
| SP2                   | NM_003110    | 106.4262639 | 12.4212357  | 1.21E-06    | 8.568089877 |
| HDHD1                 | NM_001178135 | 45.65978809 | 1.625122818 | 0.000529416 | 28.09620761 |
| PIKFYVE               | NM_001178000 | 140.5252827 | 1.274041068 | 4.44E-15    | 110.2988642 |
| RACGAP1               | NM_001126104 | 84.22773945 | 5.151937442 | 9.66E-07    | 16.34875043 |
| LOC100499484-C9ORF174 | NR_036529    | 107.737716  | 5.209592054 | 9.01E-09    | 20.68064349 |
| SACS                  | NM_001278055 | 37.2564993  | 0.666622971 | 0.000250334 | 55.88841203 |
| AFAP1                 | NM_001134647 | 46.14565165 | 4.955938048 | 0.002905826 | 9.31118412  |
| BBS9                  | NM_014451    | 31.03896394 | 0.355863879 | 0.002014085 | 87.22145107 |
| COPB2                 | NR_023350    | 100.2087285 | 0.097940083 | 4.72E-16    | 1023.163608 |
| AMZ2                  | NM_001289056 | 156.069121  | 14.16309855 | 9.80E-11    | 11.01941927 |
| FKBP3                 | NM_002013    | 68.73261391 | 7.34615391  | 7.76E-05    | 9.35627197  |
| MPP6                  | NM_016447    | 84.22773945 | 1.414051416 | 1.27E-07    | 59.56483514 |
| CRBN                  | NM_001173482 | 33.71058093 | 0.836860537 | 0.000463234 | 40.28219692 |
| VWA5A                 | NM_014622    | 38.13080067 | 1.618595065 | 0.002427871 | 23.55796178 |
| CLASP1                | NM_001142273 | 78.93321834 | 3.238987249 | 5.16E-07    | 24.36972185 |
| BLCAP                 | NM_006698    | 109.049168  | 15.09189345 | 1.08E-06    | 7.225678366 |
| EIF3J-AS1             | NR_034170    | 108.6120173 | 26.40057239 | 0.000193322 | 4.114002368 |
| KDEL2                 | NM_006854    | 98.41141291 | 10.09851802 | 1.22E-06    | 9.745134155 |
| PLCXD2                | NM_153268    | 62.07792787 | 4.4975097   | 1.00E-04    | 13.80273352 |
| TAF6L                 | NM_006473    | 66.49814761 | 14.96801688 | 0.003936517 | 4.442682564 |
| BAZ2A                 | NM_001300905 | 70.91836734 | 7.094731215 | 5.76E-05    | 9.995920239 |
| GOT2                  | NM_002080    | 95.3513581  | 3.932410894 | 4.06E-08    | 24.24755721 |
| MRRF                  | NM_138777    | 51.44017277 | 2.256128114 | 0.000143145 | 22.80020025 |
| TRPC1                 | NM_003304    | 73.15283366 | 3.118415228 | 1.19E-06    | 23.45833647 |
| ATPAF2                | NM_145691    | 88.2108085  | 8.487514624 | 1.38E-06    | 10.39300813 |
| RHOBTB1               | NM_014836    | 56.29754319 | 0.867733799 | 2.45E-06    | 64.878818   |
| MRPS35                | NM_001190864 | 93.55404248 | 3.044989696 | 7.68E-09    | 30.72392744 |
| PMS2L2                | NR_003614    | 97.09996085 | 0.369666934 | 1.42E-13    | 262.6687753 |
| CENPU                 | NR_104593    | 88.2108085  | 1.439475369 | 7.05E-09    | 61.27983182 |

|               |              |             |             |             |             |
|---------------|--------------|-------------|-------------|-------------|-------------|
| EIF4H         | NM_022170    | 176.8587677 | 7.902737332 | 3.05E-14    | 22.37943136 |
| TMEM194A      | NM_015257    | 86.02505507 | 3.169899897 | 1.69E-07    | 27.13809832 |
| MSL1          | NM_001012241 | 50.5658714  | 8.135706906 | 0.002288597 | 6.215301507 |
| ANGEL2        | NM_144567    | 72.27853228 | 4.928184417 | 8.29E-06    | 14.66636111 |
| GCFC2         | NM_003203    | 102.4431948 | 1.750144063 | 4.22E-10    | 58.53414983 |
| ADH5          | NM_000671    | 101.5201806 | 4.461741421 | 3.00E-09    | 22.75348816 |
| PGAM5         | NM_001170543 | 144.071201  | 18.10034143 | 2.02E-08    | 7.959584717 |
| RAI14         | NM_001145522 | 94.42834386 | 1.040698432 | 8.16E-10    | 90.73554927 |
| KANSL1L       | NM_152519    | 101.5201806 | 2.266606414 | 2.65E-09    | 44.78950556 |
| PDCD6IP       | NM_001162429 | 172.0013972 | 1.589847406 | 2.88E-17    | 108.1873623 |
| LAMC2         | NM_018891    | 65.18669554 | 3.768442018 | 7.16E-06    | 17.29804923 |
| STAT3         | NM_139276    | 62.51507855 | 6.502998771 | 9.38E-05    | 9.613269317 |
| LUC7L2        | NM_001270643 | 110.8464837 | 4.192640595 | 2.66E-09    | 26.43834623 |
| GSN           | NM_001127666 | 69.60691528 | 12.1239581  | 0.00043958  | 5.741269865 |
| ZNF791        | NM_153358    | 55.42324183 | 6.444271973 | 0.001331707 | 8.600388384 |
| LOC101927021  | NR_110068    | 117.9383204 | 14.24049806 | 1.77E-07    | 8.281895754 |
| PTPN12        | NM_002835    | 35.94504724 | 1.607685533 | 0.003456673 | 22.35825757 |
| BCS1L         | NM_001257342 | 66.06099693 | 15.95281226 | 0.0044314   | 4.141025159 |
| ERCC1         | NM_001983    | 82.91628738 | 17.77249649 | 0.000567896 | 4.665427134 |
| ESRP1         | NM_001034915 | 49.69157001 | 5.968074401 | 0.001579884 | 8.326231657 |
| TSC22D4       | NM_030935    | 79.37036901 | 18.17583042 | 0.000839262 | 4.366808403 |
| LCMT1         | NM_016309    | 46.14565165 | 4.872796786 | 0.002684206 | 9.470054608 |
| EIF4E2        | NM_004846    | 101.9573313 | 7.221126045 | 4.48E-08    | 14.11931195 |
| C10orf32-ASMT | NR_037644    | 127.7017741 | 5.563758422 | 6.43E-11    | 22.95242971 |
| MCCC1         | NR_120640    | 40.80241766 | 2.991099866 | 0.002021113 | 13.64127561 |
| TYRO3         | NM_006293    | 73.58998434 | 11.65598273 | 0.00011435  | 6.313494626 |
| AKR1A1        | NM_006066    | 56.34625608 | 9.85486379  | 0.002655783 | 5.717608815 |
| DHDDS         | NM_024887    | 58.09485881 | 6.401018326 | 0.000259037 | 9.075877595 |
| LRRFIP1       | NM_001137552 | 70.04406598 | 6.934619766 | 7.13E-05    | 10.10063541 |
| MTF2          | NM_001164393 | 93.55404248 | 4.862003279 | 1.13E-07    | 19.24187153 |
| GDPGP1        | NM_001013657 | 83.79058876 | 7.225219699 | 4.74E-06    | 11.59696068 |
| NDUFAB1       | NM_005003    | 72.27853228 | 8.096033248 | 3.92E-05    | 8.927647661 |
| TBCD          | NM_005993    | 95.78850885 | 11.69673774 | 2.49E-06    | 8.189335434 |
| SSR4          | NM_001204527 | 87.77365781 | 13.73728117 | 4.83E-05    | 6.389449028 |
| SET           | NM_001248001 | 59.84346156 | 9.12689211  | 0.000813189 | 6.55682798  |
| ASCC1         | NM_001198800 | 92.24259043 | 4.145959201 | 2.68E-07    | 22.24879357 |
| BCLAF1        | NM_001301038 | 70.96708023 | 6.458113621 | 5.43E-05    | 10.98882497 |
| ANXA6         | NM_001155    | 54.54894044 | 5.529372787 | 0.000487929 | 9.865303452 |
| TMX1          | NM_030755    | 73.58998434 | 1.745068729 | 8.16E-08    | 42.17024986 |
| HSCB          | NM_172002    | 93.99119317 | 5.911649781 | 1.76E-07    | 15.89931688 |
| NFKBID        | NM_139239    | 74.95014928 | 12.68376723 | 0.000287906 | 5.909139448 |
| HNRNPU        | NM_004501    | 138.7766799 | 12.57895937 | 4.92E-10    | 11.0324452  |
| C1orf174      | NM_207356    | 80.2446704  | 7.882202136 | 1.72E-05    | 10.18048878 |
| CCT6P1        | NR_003110    | 102.394482  | 6.207436924 | 1.74E-08    | 16.49545267 |
| FAM217B       | NM_001190827 | 115.2667034 | 1.326724643 | 9.47E-14    | 86.88065303 |
| MED4          | NM_001270629 | 71.8413816  | 1.473958455 | 1.56E-07    | 48.7404386  |
| ZNF34         | NM_001286769 | 111.7694979 | 8.569999747 | 3.08E-08    | 13.0419488  |
| PDCD2         | NM_001199461 | 139.6509813 | 20.37553031 | 1.20E-07    | 6.853857503 |
| HERPUD1       | NM_001010989 | 157.3805731 | 9.300233377 | 3.13E-12    | 16.92221762 |
| HINFP         | NM_198971    | 90.8824255  | 8.257732756 | 1.93E-06    | 11.00573586 |
| H2AFV         | NM_012412    | 168.9413424 | 6.322202067 | 2.02E-14    | 26.72191439 |
| LOC493754     | NR_111973    | 132.9962952 | 8.904667768 | 2.55E-10    | 14.93557072 |
| TFRC          | NM_003234    | 167.5811775 | 8.541348066 | 5.44E-13    | 19.61999163 |
| FBXL2         | NM_012157    | 53.67463907 | 2.928891497 | 1.00E-04    | 18.32592266 |
| CSTB          | NM_000100    | 179.9675353 | 34.13604493 | 3.26E-08    | 5.272067566 |
| INTS8         | NR_073445    | 151.2117506 | 5.603842042 | 5.88E-13    | 26.98358545 |
| TOR3A         | NM_022371    | 78.49606764 | 12.24172428 | 0.00017587  | 6.412174121 |
| EMID1         | NM_001267895 | 83.79058876 | 9.121089025 | 7.48E-06    | 9.186467594 |
| CAPN2         | NM_001748    | 111.7207851 | 10.36164667 | 1.30E-07    | 10.78214579 |
| C16orf13      | NR_109976    | 67.37244898 | 14.68789772 | 0.002378352 | 4.586936147 |
| ATL2          | NR_024191    | 141.399584  | 4.937618236 | 8.84E-12    | 28.63720466 |
| COA1          | NM_018224    | 75.82445064 | 5.544259921 | 5.10E-06    | 13.67620778 |

|              |              |             |             |             |             |
|--------------|--------------|-------------|-------------|-------------|-------------|
| SRP72        | NM_001267722 | 42.59973328 | 2.332726338 | 0.00081531  | 18.26177919 |
| FAM13B       | NM_001101801 | 155.1461068 | 4.056738994 | 4.11E-13    | 38.24404454 |
| ANLN         | NM_001284301 | 111.7207851 | 2.41676181  | 1.64E-10    | 46.22747041 |
| DYNLRB1      | NM_001281728 | 100.2087285 | 8.655707846 | 1.42E-07    | 11.57718471 |
| LPIN2        | NM_014646    | 27.49304557 | 1.16648488  | 0.003668376 | 23.5691401  |
| SNX9         | NM_016224    | 98.8485636  | 4.392981771 | 4.66E-08    | 22.50147366 |
| SDF2         | NM_006923    | 111.7207851 | 9.769722132 | 3.26E-08    | 11.43541071 |
| RMDN1        | NM_016033    | 101.0830299 | 4.840493604 | 2.12E-08    | 20.88279382 |
| ETV3         | NM_001145312 | 93.55404248 | 8.032616862 | 1.04E-06    | 11.64677017 |
| AHCYL2       | NM_015328    | 70.04406598 | 3.732451637 | 3.00E-06    | 18.76623538 |
| PSME4        | NM_014614    | 70.04406598 | 1.734119324 | 1.87E-06    | 40.39172219 |
| TRIM21       | NM_003141    | 47.45710371 | 2.506507638 | 0.000319408 | 18.9335564  |
| CDK2         | NM_001798    | 94.4770567  | 7.60298799  | 1.87E-07    | 12.42630619 |
| TBCCD1       | NM_018138    | 114.392402  | 4.98281714  | 3.56E-10    | 22.95737507 |
| REEP1        | NM_001164731 | 84.66489013 | 4.826507452 | 9.19E-07    | 17.54164703 |
| TAPT1        | NM_153365    | 109.049168  | 0.521731509 | 4.05E-13    | 209.0139585 |
| NRDE2        | NM_017970    | 56.73469387 | 3.351716111 | 4.55E-05    | 16.92705825 |
| ZAK          | NM_016653    | 70.52992954 | 3.11588576  | 2.87E-06    | 22.63559545 |
| PRPF18       | NM_003675    | 57.65770813 | 0.883450669 | 1.34E-06    | 65.26420793 |
| LINC01003    | NR_027387    | 133.4334458 | 29.22476752 | 4.02E-05    | 4.565765862 |
| BLOC1S2      | NM_001282439 | 239.3738462 | 8.182152131 | 1.86E-21    | 29.25560933 |
| ZNF823       | NM_001080493 | 47.01995303 | 5.261950569 | 0.001991569 | 8.935840884 |
| AFMID        | NR_027083    | 60.32932513 | 13.31808989 | 0.003665474 | 4.529878204 |
| DAP          | NM_001291963 | 105.066099  | 5.039533504 | 1.27E-08    | 20.84837791 |
| PPP2R5E      | NM_006246    | 58.09485881 | 2.06698197  | 5.52E-05    | 28.10612751 |
| EPB41        | NM_203343    | 36.8193486  | 3.602092022 | 0.003982043 | 10.22165685 |
| PSMC2        | NM_001204453 | 76.26160134 | 5.519601944 | 7.65E-06    | 13.81650382 |
| PLEKHH1      | NM_020715    | 83.35343807 | 8.085015109 | 7.32E-06    | 10.30962057 |
| PRKCD        | NM_006254    | 137.4165149 | 11.78093094 | 2.46E-09    | 11.66431716 |
| ENAH         | NM_018212    | 129.8875276 | 3.794303482 | 1.58E-11    | 34.2322453  |
| MINOS1       | NR_033758    | 83.35343807 | 5.837894537 | 9.82E-07    | 14.27799655 |
| GTSE1-AS1    | NR_024009    | 93.55404248 | 19.41783538 | 0.00065341  | 4.817943949 |
| CAD          | NM_004341    | 121.4842387 | 12.33321481 | 3.71E-08    | 9.850168067 |
| HIBADH       | NM_152740    | 104.6289483 | 2.395981742 | 1.38E-09    | 43.66850816 |
| LAMA5        | NM_005560    | 97.97426223 | 18.35492298 | 6.99E-05    | 5.337764824 |
| IPO8         | NM_006390    | 36.38219793 | 1.166424431 | 0.000425855 | 31.19121734 |
| SRXN1        | NM_080725    | 115.7038541 | 21.92780522 | 8.23E-06    | 5.276581626 |
| AGPAT2       | NM_006412    | 104.6289483 | 20.67028997 | 2.78E-05    | 5.061803604 |
| CCP110       | NM_001199022 | 54.98609113 | 5.275479103 | 0.000402446 | 10.42295686 |
| HEATR3       | NM_182922    | 51.00302207 | 1.327827021 | 7.96E-05    | 38.41089333 |
| RNF216P1     | NR_023385    | 50.5658714  | 3.575527235 | 0.000114199 | 14.14221402 |
| PDHX         | NM_003477    | 79.8075197  | 2.487122669 | 2.85E-07    | 32.08829251 |
| RNF122       | NM_024787    | 43.91118534 | 2.467242769 | 0.000596528 | 17.79767516 |
| LRIG2        | NM_014813    | 129.0132262 | 3.282008718 | 3.49E-12    | 39.30922713 |
| ZBTB8OS      | NM_178547    | 36.8193486  | 3.411806327 | 0.003082994 | 10.79174639 |
| ZDHHC21      | NM_178566    | 62.07792787 | 1.787697542 | 1.14E-05    | 34.72507313 |
| LRPPRC       | NM_133259    | 112.2066486 | 4.757431334 | 4.30E-09    | 23.58555293 |
| ARPC5        | NM_005717    | 58.96916018 | 10.95135263 | 0.001231414 | 5.38464628  |
| TMCO4        | NM_181719    | 112.1579357 | 7.342832316 | 3.08E-08    | 15.27447869 |
| C12orf65     | NM_001194995 | 51.00302207 | 6.847438936 | 0.002585684 | 7.448481476 |
| LOC100288181 | NR_038925    | 145.431366  | 15.27599197 | 1.86E-09    | 9.520256769 |
| WDR55        | NM_017706    | 82.4791367  | 10.91789893 | 2.22E-05    | 7.55448802  |
| POLR3C       | NM_006468    | 71.8413816  | 3.186760411 | 3.82E-06    | 22.54370343 |
| DTNBP1       | NM_001271669 | 62.51507855 | 2.874370256 | 1.65E-05    | 21.74913911 |
| DNTTIP1      | NM_052951    | 136.5422136 | 7.355936224 | 2.18E-11    | 18.56218019 |
| SUMF2        | NM_001042469 | 111.2836343 | 5.743223993 | 3.42E-09    | 19.37650951 |
| ZDHHC7       | NM_001145548 | 154.7089561 | 10.86301261 | 1.77E-11    | 14.2418095  |
| RRM1         | NM_001033    | 45.22263741 | 5.389134376 | 0.002565602 | 8.391447356 |
| KCTD20       | NM_001286580 | 58.96916018 | 6.617141355 | 0.00015397  | 8.911576317 |
| ITGA1        | NM_181501    | 31.52482751 | 1.169787078 | 0.002047778 | 26.94920137 |
| SEC23IP      | NR_037771    | 136.1050629 | 4.233523187 | 7.30E-12    | 32.14936044 |
| ZC3H14       | NM_001160103 | 90.8824255  | 1.868486425 | 8.73E-09    | 48.63959636 |



|           |              |             |             |             |             |
|-----------|--------------|-------------|-------------|-------------|-------------|
| SBK1      | NM_001024401 | 131.1989796 | 12.02458123 | 7.71E-09    | 10.91089802 |
| CCDC82    | NM_024725    | 108.6120173 | 2.487872529 | 1.24E-10    | 43.65658452 |
| FLJ31306  | NR_029435    | 89.13382275 | 6.101602646 | 2.93E-07    | 14.60826408 |
| RCOR3     | NM_001136223 | 105.5032497 | 2.752362617 | 6.32E-10    | 38.33188586 |
| CHCHD7    | NM_024300    | 131.2476924 | 11.81600111 | 2.11E-09    | 11.10762357 |
| RGS9BP    | NM_207391    | 54.54894044 | 8.825122051 | 0.003195438 | 6.181097568 |
| HMGCR     | NM_001130996 | 97.53711154 | 3.483347915 | 1.47E-08    | 28.00096744 |
| VDR       | NM_000376    | 125.9044585 | 9.279403046 | 1.49E-09    | 13.56816358 |
| GOSR1     | NM_004871    | 115.7038541 | 3.626610293 | 8.92E-10    | 31.90413217 |
| PTDSS2    | NM_030783    | 69.1697646  | 9.323183907 | 0.000116332 | 7.419114038 |
| PPP2R4    | NM_001271832 | 105.066099  | 14.51776252 | 1.38E-06    | 7.237072435 |
| NMNAT3    | NM_178177    | 27.93019625 | 0.720670289 | 0.003492771 | 38.75585918 |
| ERCC5     | NM_000123    | 45.65978809 | 3.418474007 | 0.000465207 | 13.35677498 |
| NOTCH2    | NM_024408    | 120.1727867 | 3.189490542 | 8.49E-11    | 37.67773727 |
| ATP5SL    | NM_001167869 | 91.36828904 | 13.41491186 | 2.35E-05    | 6.810949636 |
| RPL31     | NM_000993    | 113.9552513 | 25.09553948 | 3.19E-05    | 4.54085681  |
| ELL2      | NM_012081    | 40.80241766 | 2.915187735 | 0.001991569 | 13.99649744 |
| SPRYD3    | NM_032840    | 85.10204081 | 17.7268483  | 0.000336588 | 4.800742882 |
| MED9      | NM_018019    | 82.91628738 | 7.152990384 | 3.11E-06    | 11.59183543 |
| ZNF708    | NM_001297561 | 73.15283366 | 0.598975289 | 3.25E-09    | 122.1299692 |
| MEX3B     | NM_032246    | 83.35343807 | 7.465441464 | 5.67E-06    | 11.16523899 |
| PTPN2     | NM_080423    | 130.3246782 | 4.495557894 | 5.97E-11    | 28.98965629 |
| IFT88     | NM_006531    | 75.82445064 | 1.676341374 | 5.61E-07    | 45.23210594 |
| SEC24C    | NM_198597    | 87.77365781 | 9.783887124 | 7.52E-06    | 8.971245958 |
| CDK6      | NM_001145306 | 85.10204081 | 3.599561814 | 1.50E-07    | 23.64233349 |
| PSMA7     | NM_002792    | 109.4863187 | 20.8290083  | 2.25E-05    | 5.256434541 |
| CARS2     | NM_024537    | 97.53711154 | 8.661930722 | 4.57E-07    | 11.26043542 |
| REL       | NM_002908    | 74.02713503 | 1.91280582  | 5.20E-07    | 38.70081022 |
| NGFRAP1   | NM_206917    | 74.02713503 | 17.23271073 | 0.004236656 | 4.295733631 |
| SVIL      | NM_003174    | 76.26160134 | 4.007340357 | 9.47E-07    | 19.03047771 |
| CAMK2G    | NM_172171    | 91.75672686 | 12.4766303  | 2.15E-05    | 7.354287549 |
| NUF2      | NM_145697    | 37.2564993  | 1.181442289 | 0.002133379 | 31.53476022 |
| RPS23     | NM_001025    | 178.2189327 | 21.92836932 | 1.15E-10    | 8.12732265  |
| PSMD7     | NM_002811    | 104.6289483 | 12.57042643 | 1.34E-06    | 8.323420758 |
| NHLRC3    | NM_001012754 | 43.03688397 | 3.442830138 | 0.002388942 | 12.50043779 |
| COPA      | NM_004371    | 100.2087285 | 3.328622345 | 2.86E-09    | 30.10516609 |
| KIF22     | NM_001256269 | 135.6679122 | 21.09752069 | 1.60E-07    | 6.430514479 |
| PPAP2C    | NM_177526    | 74.46428571 | 12.19462749 | 0.000250132 | 6.106319012 |
| CCDC6     | NM_005436    | 47.45710371 | 1.674751075 | 0.00030724  | 28.33681042 |
| XPO6      | NM_001270940 | 91.31957618 | 5.669560607 | 2.91E-07    | 16.10699356 |
| GIT2      | NM_057170    | 101.9573313 | 7.500943816 | 1.38E-07    | 13.59260032 |
| AP4E1     | NM_007347    | 93.55404248 | 2.304784693 | 1.28E-08    | 40.59122867 |
| LINC00674 | NR_027418    | 57.22055744 | 5.217548941 | 0.000233626 | 10.96694216 |
| COL6A2    | NM_001849    | 64.31239418 | 9.606147767 | 0.000641341 | 6.694920351 |
| ADAL      | NM_001159280 | 45.70850097 | 3.179885532 | 0.000404914 | 14.37425986 |
| ITCH      | NM_001257137 | 107.737716  | 4.401480741 | 8.65E-09    | 24.47760705 |
| SRSF4     | NM_005626    | 56.78340675 | 8.480359157 | 0.000993164 | 6.695872864 |
| GPATCH2L  | NM_017926    | 148.05427   | 3.492361891 | 5.54E-13    | 42.39373658 |
| TMEM87A   | NM_001286487 | 43.03688397 | 3.946172678 | 0.001102776 | 10.90598093 |
| EIF3J     | NM_001284336 | 116.5781554 | 8.492192084 | 3.77E-09    | 13.72768707 |
| WDR60     | NM_018051    | 44.34833603 | 2.887691169 | 0.000603224 | 15.35771432 |
| LIN54     | NM_001115008 | 59.84346156 | 1.677799466 | 2.15E-05    | 35.66782729 |
| ADNP      | NM_001282531 | 74.46428571 | 5.712641852 | 7.13E-06    | 13.03499986 |
| SORD      | NR_034039    | 44.34833603 | 3.492370231 | 0.000559814 | 12.69863534 |
| POLR2G    | NM_002696    | 66.06099693 | 9.95800478  | 0.000632724 | 6.63395915  |
| SOCS4     | NM_080867    | 90.8824255  | 4.61209936  | 7.51E-08    | 19.70521847 |
| PPP3R1    | NM_000945    | 130.7618289 | 2.843513527 | 2.66E-12    | 45.98600559 |
| GLUL      | NM_002065    | 81.11897176 | 13.37822425 | 8.84E-05    | 6.063508147 |
| DNAJC1    | NM_022365    | 90.4452748  | 2.205049325 | 3.96E-08    | 41.01734767 |
| SMARCB1   | NM_003073    | 102.8803456 | 10.05603527 | 6.02E-07    | 10.23070652 |
| LINC01271 | NR_109950    | 54.98609113 | 9.1464879   | 0.003509715 | 6.01171638  |
| AP4M1     | NM_004722    | 94.86549455 | 20.5259162  | 0.0002476   | 4.621742271 |

|           |              |             |             |             |             |
|-----------|--------------|-------------|-------------|-------------|-------------|
| VPS36     | NM_001282168 | 126.3416091 | 2.67288645  | 2.21E-12    | 47.267855   |
| LGALS3    | NM_001177388 | 172.0013972 | 9.920961275 | 4.09E-13    | 17.33717051 |
| SAA2      | NM_001127380 | 33.71058093 | 3.178645488 | 0.003717262 | 10.60532892 |
| TRAPPC10  | NM_003274    | 122.7956908 | 5.195253256 | 3.86E-10    | 23.63613183 |
| SPTSSB    | NM_001040100 | 47.45710371 | 0.987076546 | 8.29E-05    | 48.07844325 |
| THOC7     | NM_001285404 | 93.99119317 | 3.47475699  | 3.90E-08    | 27.04971699 |
| LINC01494 | NR_110238    | 45.22263741 | 6.066909766 | 0.002431504 | 7.4539822   |
| CASP2     | NM_032982    | 58.96916018 | 7.216694464 | 0.000450062 | 8.171214741 |
| SMC1A     | NM_006306    | 54.54894044 | 3.502157835 | 8.34E-05    | 15.57580869 |
| DUSP14    | NM_007026    | 123.6699922 | 5.140368965 | 6.20E-11    | 24.05858277 |
| HGSNAT    | NM_152419    | 75.82445064 | 0.175338643 | 1.46E-10    | 432.4457492 |
| IQCB1     | NM_001023570 | 86.89935644 | 4.02646066  | 6.59E-07    | 21.58207015 |
| STRBP     | NM_018387    | 83.79058876 | 3.126171594 | 2.32E-07    | 26.80293971 |
| EPS8L2    | NM_022772    | 93.11689181 | 20.2110135  | 9.24E-05    | 4.607235149 |
| COG4      | NM_001195139 | 113.9552513 | 4.399581549 | 9.60E-10    | 25.90138405 |
| ATP2A3    | NM_174955    | 85.10204081 | 15.0492748  | 5.80E-05    | 5.65489314  |
| HNRNPH3   | NM_012207    | 78.49606764 | 9.999170215 | 4.05E-05    | 7.850258167 |
| SNX12     | NM_001256188 | 39.00510204 | 1.321766895 | 0.00032683  | 29.50981915 |
| POLR1B    | NM_001282776 | 70.96708023 | 5.208349285 | 1.13E-05    | 13.62563767 |
| PTRHD1    | NM_001013663 | 62.07792787 | 2.621198361 | 3.00E-06    | 23.68303322 |
| DCBLD1    | NM_173674    | 115.2667034 | 2.173797794 | 1.14E-10    | 53.02549467 |
| CNKSR1    | NM_001297647 | 66.93529829 | 9.287009076 | 0.000420688 | 7.207411745 |
| ELOVL1    | NM_001256401 | 158.2548744 | 39.09030105 | 5.20E-06    | 4.04844348  |
| ZC3HAV1   | NM_020119    | 89.57097344 | 3.613157765 | 4.77E-08    | 24.79021932 |
| TRIM9     | NM_052978    | 43.91118534 | 2.186604673 | 0.001078143 | 20.0819041  |
| SFPQ      | NM_005066    | 148.5401337 | 13.49122922 | 1.58E-10    | 11.010126   |
| NEK3      | NM_152720    | 39.05381491 | 0.079980456 | 2.33E-06    | 488.2919791 |
| VRK1      | NM_003384    | 90.00812411 | 3.502414141 | 2.95E-08    | 25.69888097 |
| CGNL1     | NM_032866    | 27.93019625 | 1.048547849 | 0.003924154 | 26.63702593 |
| UHMK1     | NM_175866    | 121.9213894 | 4.6310491   | 9.15E-11    | 26.32694813 |
| LDHB      | NM_001174097 | 115.2667034 | 6.557007692 | 4.03E-09    | 17.57916244 |
| AUH       | NM_001698    | 64.74954487 | 3.203246341 | 9.26E-06    | 20.21372632 |
| C15orf48  | NM_197955    | 41.67671904 | 1.622297921 | 0.000144314 | 25.68992939 |
| PTGR2     | NM_001146154 | 71.8413816  | 6.286048318 | 1.22E-05    | 11.42870337 |
| MMGT1     | NM_173470    | 39.00510204 | 2.871866727 | 0.000932801 | 13.58179392 |
| YBX3      | NM_001145426 | 130.3246782 | 6.795630798 | 1.08E-10    | 19.1777161  |
| UBA2      | NM_005499    | 160.0521901 | 5.305706608 | 4.78E-14    | 30.16604609 |
| NCAPG2    | NR_104054    | 111.2836343 | 4.189537039 | 3.03E-09    | 26.56227485 |
| E2F7      | NM_203394    | 179.5303847 | 5.787122666 | 6.12E-15    | 31.02239145 |
| GYS1      | NR_027763    | 65.18669554 | 12.71739575 | 0.001757205 | 5.12578965  |
| RAD51B    | NM_133509    | 46.09693877 | 4.140068521 | 0.000711221 | 11.13434199 |
| SEL1L     | NM_001244984 | 101.5201806 | 0.506401887 | 3.03E-12    | 200.4735432 |
| SAYS1D1   | NM_018322    | 80.68182108 | 3.133955105 | 1.65E-07    | 25.7444087  |
| GOSR2     | NM_001012511 | 154.3205183 | 11.54441458 | 1.70E-11    | 13.3675482  |
| FAM73A    | NM_198549    | 89.57097344 | 3.606210464 | 6.12E-08    | 24.83797724 |
| TPM2      | NM_001301227 | 97.53711154 | 19.10938419 | 7.09E-05    | 5.10414729  |
| STOX1     | NM_001130160 | 102.394482  | 4.696709026 | 1.90E-08    | 21.80132544 |
| APLP2     | NM_001642    | 64.31239418 | 4.322585851 | 4.80E-05    | 14.87822253 |
| STRN3     | NM_014574    | 136.9793643 | 2.607865554 | 1.50E-12    | 52.52547012 |
| SPIN3     | NR_027139    | 72.27853228 | 1.826612965 | 2.35E-07    | 39.56970286 |
| EPG5      | NM_020964    | 70.48121666 | 1.088901253 | 1.34E-07    | 64.72691299 |
| PGS1      | NR_111989    | 120.6099374 | 15.59800578 | 3.71E-07    | 7.732394711 |
| MAST3     | NM_015016    | 66.06099693 | 11.07342765 | 0.00070819  | 5.965722543 |
| BRMS1L    | NM_032352    | 93.55404248 | 1.647505003 | 2.88E-09    | 56.78528581 |
| MRPL10    | NM_145255    | 179.5790976 | 16.56587594 | 3.06E-12    | 10.84030197 |
| PITPNA    | NM_006224    | 152.0373391 | 10.26243932 | 3.72E-11    | 14.81493184 |
| UGT8      | NM_001128174 | 35.94504724 | 1.413483683 | 0.003183056 | 25.4301112  |
| GTF2H2C_2 | NM_001042490 | 85.58790438 | 1.707169446 | 1.39E-08    | 50.13439328 |
| TUFT1     | NM_001301317 | 164.0352591 | 5.600737671 | 3.15E-14    | 29.28815252 |
| ZNF414    | NM_032370    | 103.3174962 | 25.64256214 | 0.000321093 | 4.029140912 |
| ZNF780A   | NM_001142577 | 73.58998434 | 5.393436216 | 3.62E-06    | 13.64435981 |
| SLC46A3   | NM_181785    | 30.60181325 | 0.869633547 | 0.000716746 | 35.18932011 |

|              |              |             |             |             |             |
|--------------|--------------|-------------|-------------|-------------|-------------|
| GCC2         | NR_028063    | 59.84346156 | 1.72545548  | 1.74E-05    | 34.68270394 |
| HNRNPC       | NM_001077442 | 128.5760755 | 9.386251587 | 4.16E-09    | 13.69834106 |
| CNKS3        | NM_173515    | 57.22055744 | 3.55016405  | 5.59E-05    | 16.11772207 |
| EFCAB2       | NM_001290327 | 136.9793643 | 3.304911955 | 1.71E-12    | 41.44720529 |
| ATAD3B       | NM_031921    | 126.7787599 | 19.07419403 | 3.43E-07    | 6.646611632 |
| YPEL1        | NM_013313    | 88.2108085  | 7.893244795 | 1.95E-06    | 11.17548116 |
| REPS1        | NM_001286612 | 54.98609113 | 2.826468376 | 9.29E-05    | 19.45399128 |
| PABPC4       | NM_001135654 | 144.071201  | 15.82235816 | 7.49E-09    | 9.105545429 |
| INVS         | NM_183245    | 64.74954487 | 2.672162164 | 9.50E-06    | 24.2311435  |
| NPNT         | NM_001033047 | 44.34833603 | 1.870743614 | 0.000523994 | 23.70626082 |
| GNL2         | NM_013285    | 71.40423091 | 4.038782951 | 8.40E-06    | 17.67964057 |
| CLSPN        | NM_001190481 | 127.7017741 | 5.806708415 | 4.90E-11    | 21.99211068 |
| LAMTOR5-AS1  | NR_102697    | 74.95014928 | 9.769640998 | 5.50E-05    | 7.671740374 |
| PARP16       | NM_017851    | 61.64077717 | 9.245075603 | 0.000321912 | 6.667417317 |
| AGAP1        | NM_001037131 | 113.4693878 | 4.688008923 | 3.81E-09    | 24.20417487 |
| RBMX2        | NM_016024    | 53.18877551 | 1.94669183  | 1.27E-05    | 27.32264794 |
| GLS          | NM_014905    | 154.7089561 | 4.044533258 | 3.57E-13    | 38.25137445 |
| PDHA1        | NM_001173455 | 44.78548671 | 2.519995507 | 0.000283168 | 17.77205022 |
| ENTPD6       | NM_001114089 | 71.8413816  | 6.1527709   | 1.16E-05    | 11.67626469 |
| SLC35F5      | NM_025181    | 118.375471  | 1.714106854 | 8.44E-12    | 69.05956344 |
| ULBP3        | NM_024518    | 93.99119317 | 21.3626903  | 0.000198662 | 4.399782604 |
| SMTN         | NM_006932    | 149.414435  | 26.6753943  | 1.79E-07    | 5.601208116 |
| SMN2         | NM_022876    | 134.8423237 | 22.50368117 | 2.67E-07    | 5.992011828 |
| GNPDA1       | NM_005471    | 87.33650713 | 8.922567162 | 3.53E-06    | 9.788271194 |
| MCOLN3       | NM_001253693 | 43.03688397 | 3.125953109 | 0.000856912 | 13.76760382 |
| XYLT2        | NR_110010    | 87.77365781 | 21.11027294 | 0.000535333 | 4.157864659 |
| ARHGEF12     | NM_015313    | 36.8193486  | 3.757308279 | 0.003917895 | 9.799395169 |
| SAP130       | NM_001145928 | 76.69875203 | 3.554939109 | 6.86E-07    | 21.57526463 |
| CHPT1        | NM_020244    | 105.9404003 | 2.959620068 | 2.54E-10    | 35.79527031 |
| TUBGCP5      | NM_052903    | 100.2087285 | 3.240720677 | 1.84E-09    | 30.92174196 |
| PAXBP1       | NM_013329    | 108.6120173 | 2.374769387 | 6.97E-11    | 45.73581667 |
| CHST12       | NM_001243795 | 91.31957618 | 6.08747078  | 1.50E-07    | 15.00123442 |
| EIF3H        | NM_003756    | 103.3174962 | 2.962393708 | 2.58E-09    | 34.87635554 |
| LOC101928069 | NR_120586    | 114.8295527 | 24.60004408 | 2.41E-05    | 4.667859633 |
| BZW2         | NM_014038    | 175.5473156 | 3.373430168 | 1.40E-15    | 52.03822426 |
| RRP9         | NM_004704    | 89.57097344 | 10.00407869 | 9.06E-06    | 8.953445512 |
| DDX49        | NM_019070    | 90.00812411 | 17.69815008 | 8.90E-05    | 5.08573629  |
| ATXN10       | NM_001167621 | 152.0373391 | 4.811232651 | 1.49E-12    | 31.6004962  |
| KHDC1        | NM_001251874 | 130.3246782 | 4.373478999 | 4.04E-11    | 29.79885766 |
| RHBDF2       | NM_024599    | 145.431366  | 23.06564734 | 1.12E-07    | 6.305106632 |
| TMEM56       | NM_152487    | 52.80033771 | 1.739338431 | 0.000146166 | 30.35656361 |
| MYH10        | NM_005964    | 66.93529829 | 3.707063279 | 9.62E-06    | 18.05615207 |
| MLEC         | NM_014730    | 115.2667034 | 11.70550654 | 1.06E-07    | 9.847220446 |
| AASDH        | NM_001286671 | 45.70850097 | 2.707114155 | 0.000512142 | 16.88458571 |
| LCLAT1       | NM_001002257 | 43.47403467 | 2.133669412 | 0.001178619 | 20.3752439  |
| POLR3K       | NM_016310    | 70.48121666 | 6.189749025 | 1.03E-05    | 11.38676486 |
| WASF2        | NM_001201404 | 157.3805731 | 5.312529849 | 2.76E-13    | 29.62441202 |
| HBPI         | NM_001244262 | 47.8942544  | 3.176112023 | 0.000247792 | 15.07952303 |
| RB1          | NM_000321    | 47.45710371 | 1.20703442  | 3.89E-05    | 39.31710888 |
| STK40        | NM_032017    | 109.049168  | 12.4773681  | 8.21E-07    | 8.739757227 |
| PACS1        | NM_018026    | 90.4452748  | 5.349559029 | 3.18E-07    | 16.9070524  |
| VPS33A       | NM_022916    | 54.11178977 | 3.752408312 | 7.47E-05    | 14.42054949 |
| FMNL3        | NM_198900    | 52.31447414 | 7.486623449 | 0.003115347 | 6.987726108 |
| LYPLA1       | NM_001279356 | 73.58998434 | 2.266243207 | 7.34E-07    | 32.47223604 |
| ARHGAP17     | NM_001006634 | 81.11897176 | 4.254317023 | 2.65E-06    | 19.06744874 |
| RAB9A        | NM_001195328 | 47.45710371 | 1.140719335 | 6.73E-05    | 41.60278717 |
| SLC25A19     | NM_021734    | 175.1101649 | 15.83187214 | 1.44E-11    | 11.0606101  |
| LOC439933    | NR_122079    | 76.69875203 | 1.371013504 | 7.32E-08    | 55.9431047  |
| DNAJC7       | NM_003315    | 125.0301571 | 7.637990539 | 9.26E-10    | 16.36950929 |
| KLHL22       | NR_033825    | 94.42834386 | 7.92699173  | 7.29E-07    | 11.91225462 |
| ACTR2        | NM_001005386 | 43.47403467 | 3.360881996 | 0.000985531 | 12.93530529 |
| ZNF250       | NM_021061    | 64.31239418 | 10.14029531 | 0.000592743 | 6.342260479 |

|              |              |             |             |             |             |
|--------------|--------------|-------------|-------------|-------------|-------------|
| MTFR1L       | NM_001099625 | 77.13590271 | 12.19684088 | 0.000167854 | 6.324252603 |
| DTX2         | NM_001102594 | 117.9383204 | 12.06328153 | 1.57E-07    | 9.77663666  |
| UBE2W        | NR_073121    | 115.2667034 | 4.2782081   | 2.00E-09    | 26.94275282 |
| PHF6         | NM_032335    | 63.38937993 | 1.568820298 | 5.89E-06    | 40.40576222 |
| ATP1B3       | NM_001679    | 129.4503768 | 5.118998113 | 6.12E-11    | 25.28822514 |
| MYO6         | NM_001300899 | 93.99119317 | 1.644160183 | 1.53E-08    | 57.1666886  |
| ZNF24        | NM_006965    | 97.09996085 | 6.475746852 | 6.92E-08    | 14.99440344 |
| L3HYPDH      | NM_144581    | 93.11689181 | 4.186373646 | 8.52E-09    | 22.24285257 |
| MARK1        | NM_018650    | 56.34625608 | 1.651837221 | 4.91E-05    | 34.11126433 |
| LRCH3        | NM_032773    | 157.3805731 | 3.097854612 | 1.07E-14    | 50.80308565 |
| TPCN1        | NM_017901    | 118.375471  | 9.07533949  | 9.13E-09    | 13.04364108 |
| NUP54        | NR_103781    | 93.55404248 | 6.368573857 | 4.84E-07    | 14.68995172 |
| MRPS23       | NM_016070    | 56.78340675 | 7.434710704 | 0.000605294 | 7.637608108 |
| TOP3B        | NM_001282112 | 151.1630377 | 17.07693683 | 2.71E-09    | 8.851882464 |
| POLG         | NM_002693    | 189.2938384 | 23.52198823 | 2.95E-11    | 8.047527131 |
| TAF5L        | NM_014409    | 187.4965228 | 4.223743134 | 9.78E-18    | 44.39108081 |
| HIF1A        | NM_181054    | 97.97426223 | 3.179770738 | 4.98E-09    | 30.81173779 |
| ATG3         | NM_001278712 | 97.09996085 | 1.853154052 | 6.56E-10    | 52.39713383 |
| NCKIPSD      | NM_016453    | 129.0132262 | 17.05151819 | 9.46E-08    | 7.566084421 |
| MAPK1        | NM_138957    | 138.7766799 | 4.285102995 | 9.20E-12    | 32.38584465 |
| SLC25A15     | NM_014252    | 116.1410048 | 5.093119384 | 2.24E-10    | 22.80351117 |
| UBE4A        | NM_004788    | 58.96916018 | 5.475568877 | 0.000137724 | 10.76950386 |
| LOC100505915 | NR_125434    | 72.27853228 | 5.5171974   | 5.86E-06    | 13.1005884  |
| C11orf24     | NM_022338    | 100.2087285 | 14.18340981 | 5.70E-06    | 7.06520716  |
| TBRG1        | NM_032811    | 74.51299858 | 6.454578395 | 1.47E-05    | 11.54420847 |
| C18orf54     | NM_001288980 | 62.51507855 | 2.164244425 | 4.52E-06    | 28.88540584 |
| SLC31A1      | NM_001859    | 54.54894044 | 3.859396621 | 8.27E-05    | 14.13405923 |
| ARHGEF39     | NM_032818    | 132.5591446 | 28.9563438  | 6.91E-06    | 4.577896488 |
| TFCP2L1      | NM_014553    | 136.9793643 | 4.560527847 | 1.22E-11    | 30.03585744 |
| DYRK2        | NM_003583    | 79.8075197  | 3.278793026 | 3.00E-07    | 24.3405177  |
| SF3B1        | NM_001005526 | 46.58280234 | 4.019541735 | 0.001685391 | 11.58908289 |
| FOXO1        | NM_002015    | 125.9044585 | 0.983249625 | 1.70E-13    | 128.0493329 |
| FRAS1        | NM_025074    | 69.60691528 | 1.807745714 | 5.62E-06    | 38.50481556 |
| LOC101593348 | NR_103497    | 76.26160134 | 9.188913264 | 8.93E-05    | 8.299305821 |
| BTG3         | NM_006806    | 62.07792787 | 2.777473456 | 4.63E-06    | 22.35050266 |
| UBE2G2       | NM_003343    | 51.87732345 | 4.554164715 | 0.000721149 | 11.39118295 |
| BBS1         | NM_024649    | 89.57097344 | 11.27180163 | 7.31E-06    | 7.946464673 |
| TMEM72-AS1   | NR_033842    | 51.87732345 | 2.630116356 | 0.000191    | 19.7243454  |
| UTP14A       | NM_001166221 | 45.65978809 | 5.607054027 | 0.002243317 | 8.143275929 |
| TAF6         | NM_005641    | 84.71360301 | 18.0719405  | 0.000308753 | 4.687576469 |
| EIF4EBP1     | NM_004095    | 84.22773945 | 4.385040358 | 7.13E-07    | 19.2079736  |
| MRPL22       | NM_001014990 | 54.98609113 | 1.400137262 | 2.87E-05    | 39.271929   |
| WDR1         | NM_017491    | 77.57305339 | 11.99157424 | 8.49E-05    | 6.468963276 |
| OSER1-AS1    | NR_038337    | 64.74954487 | 4.635544301 | 1.86E-05    | 13.96805654 |
| C19orf12     | NM_001256047 | 87.33650713 | 8.855367641 | 4.87E-06    | 9.862550112 |
| JKAMP        | NM_001284203 | 32.83627956 | 0.500302944 | 0.000453257 | 65.63279299 |
| SLC35E4      | NM_001001479 | 73.15283366 | 8.811884844 | 7.01E-05    | 8.301610263 |
| ZMYM1        | NM_001289089 | 63.43809281 | 3.236330602 | 9.83E-06    | 19.60185797 |
| ACBD6        | NM_032360    | 113.9552513 | 2.136260972 | 2.74E-10    | 53.34331939 |
| RBPJ         | NM_005349    | 55.42324183 | 3.231602382 | 0.00010272  | 17.1503902  |
| RFT1         | NM_052859    | 72.71568297 | 6.043382278 | 1.33E-05    | 12.03228252 |
| KIF3A        | NM_001300792 | 93.55404248 | 2.225935038 | 4.74E-09    | 42.02909829 |
| LOC101928053 | NR_120540    | 123.6699922 | 5.584608616 | 1.24E-10    | 22.14479129 |
| IL4R         | NM_001257997 | 51.44017277 | 7.925166791 | 0.003034034 | 6.490736931 |
| CENPC        | NM_001812    | 101.0830299 | 0.544559566 | 8.36E-12    | 185.6234584 |
| SIKE1        | NR_049741    | 93.11689181 | 3.120198853 | 3.32E-09    | 29.84325558 |
| GFPT2        | NM_005110    | 118.8126218 | 8.657360409 | 4.05E-09    | 13.72388536 |
| AIMP2        | NM_006303    | 100.2087285 | 12.64695454 | 2.09E-06    | 7.923546194 |
| ZNF557       | NM_001044387 | 158.2548744 | 10.10054692 | 1.37E-11    | 15.66795102 |
| MRPL50       | NM_019051    | 42.55102041 | 1.669687396 | 0.000173856 | 25.48442332 |
| FUNDC1       | NM_173794    | 48.76855577 | 1.622781851 | 9.74E-05    | 30.05244097 |
| PHKA1        | NM_002637    | 35.02203299 | 0.487784587 | 0.000808513 | 71.79815419 |

|            |              |             |             |             |             |
|------------|--------------|-------------|-------------|-------------|-------------|
| USP28      | NM_020886    | 105.9404003 | 2.343444786 | 7.73E-10    | 45.20712457 |
| NUP43      | NR_104456    | 75.82445064 | 6.917840249 | 1.37E-05    | 10.96071142 |
| ZNF518B    | NM_053042    | 45.22263741 | 3.982874868 | 0.001753003 | 11.3542702  |
| CCDC112    | NM_001040440 | 52.31447414 | 1.979910664 | 8.73E-05    | 26.42264376 |
| PRC1       | NM_001267580 | 51.00302207 | 7.931619561 | 0.00277043  | 6.430341456 |
| ARL8B      | NM_018184    | 72.27853228 | 1.689649654 | 1.15E-06    | 42.77723023 |
| RRN3       | NM_018427    | 119.2497724 | 1.769990976 | 2.03E-12    | 67.37309628 |
| ZNF641     | NM_001172681 | 94.42834386 | 10.56280781 | 4.03E-06    | 8.939701027 |
| RNF217     | NM_001286398 | 39.49096561 | 1.886921715 | 0.002000968 | 20.92877796 |
| MATR3      | NM_018834    | 129.8875276 | 7.854675699 | 4.78E-10    | 16.53633231 |
| NFKBIB     | NR_040515    | 63.87524348 | 10.48047188 | 0.000651326 | 6.094691555 |
| POLI       | NM_007195    | 41.28828123 | 1.66400086  | 0.001185394 | 24.81265618 |
| NAA30      | NM_001011713 | 105.5032497 | 4.282322528 | 2.20E-09    | 24.63692283 |
| PBDC1      | NM_016500    | 45.65978809 | 4.889271687 | 0.002804644 | 9.338770887 |
| ZDHHC16    | NM_198044    | 117.9383204 | 16.98862281 | 8.03E-07    | 6.942194296 |
| ATRIP      | NM_001271022 | 142.759749  | 11.07169204 | 3.61E-10    | 12.89412209 |
| LSM6       | NM_007080    | 100.6458792 | 4.108405705 | 3.09E-09    | 24.49755123 |
| INIP       | NM_021218    | 40.80241766 | 3.060085081 | 0.001640618 | 13.33375268 |
| CDC14A     | NM_033312    | 83.35343807 | 1.811436384 | 1.82E-07    | 46.01510646 |
| ZNF552     | NM_024762    | 62.95222924 | 7.84927143  | 0.000465865 | 8.02013662  |
| PRKCQ      | NM_001282644 | 60.28061224 | 0.092271074 | 8.30E-08    | 653.2991267 |
| ZNF324B    | NM_207395    | 75.38729997 | 18.7877558  | 0.003482244 | 4.012576103 |
| FAM168A    | NM_015159    | 51.00302207 | 4.133470878 | 0.000206663 | 12.33903022 |
| DHX40      | NM_001166301 | 51.44017277 | 5.543286835 | 0.000819312 | 9.27972416  |
| ARNTL      | NM_001297719 | 48.33140508 | 6.284980705 | 0.001661243 | 7.68998464  |
| GTF2B      | NM_001514    | 82.91628738 | 2.412196787 | 6.92E-08    | 34.37376578 |
| FXR2       | NM_004860    | 101.9573313 | 12.36719787 | 1.72E-06    | 8.244174011 |
| SLC16A13   | NM_201566    | 94.42834386 | 10.00277446 | 1.94E-06    | 9.440215233 |
| TTLL13     | NR_104604    | 61.2036265  | 13.31652628 | 0.003564145 | 4.59606546  |
| LPCAT4     | NM_153613    | 77.13590271 | 13.02792797 | 0.000125695 | 5.920811269 |
| MSANTD3    | NM_001198805 | 105.9404003 | 3.218254746 | 1.44E-09    | 32.91858746 |
| DNMBP      | NM_015221    | 166.2210125 | 6.582500968 | 8.77E-14    | 25.25195413 |
| TIMP2      | NM_003255    | 113.4693878 | 16.20659862 | 1.21E-06    | 7.001431354 |
| SNRPE      | NM_003094    | 114.8295527 | 7.059893461 | 3.84E-09    | 16.26505462 |
| MDH2       | NM_001282404 | 115.2667034 | 10.79778798 | 3.25E-08    | 10.67502933 |
| CDC40      | NM_015891    | 64.74954487 | 1.690974563 | 3.95E-06    | 38.29125895 |
| C15orf57   | NM_001080792 | 43.91118534 | 5.892421615 | 0.003231011 | 7.452145859 |
| PITPNA-AS1 | NR_028514    | 125.9044585 | 9.053062492 | 8.09E-08    | 13.90738864 |
| SLC20A2    | NM_001257181 | 80.2446704  | 4.288970166 | 2.86E-06    | 18.70954268 |
| TMCO3      | NM_017905    | 104.1917976 | 8.078829542 | 1.36E-07    | 12.89689268 |
| ITGA2B     | NM_000419    | 58.09485881 | 9.876278175 | 0.002574722 | 5.882262304 |
| STX18      | NM_016930    | 82.4791367  | 2.715980547 | 2.04E-07    | 30.36808816 |
| CUL9       | NM_015089    | 69.60691528 | 9.949583892 | 0.000399315 | 6.995962448 |
| CDKN2A     | NM_058195    | 49.20570646 | 4.248544215 | 0.001180796 | 11.58178048 |
| TWSG1      | NM_020648    | 62.95222924 | 3.134807481 | 1.35E-05    | 20.0816891  |
| SDHAP1     | NR_003264    | 111.2836343 | 12.76922037 | 3.92E-07    | 8.714990507 |
| IFT22      | NM_001287525 | 62.95222924 | 5.790749775 | 0.000105905 | 10.87117069 |
| RHNO1      | NM_001257098 | 118.375471  | 7.354067191 | 4.11E-09    | 16.09659906 |
| DIDO1      | NM_001193370 | 97.09996085 | 10.70997444 | 1.72E-06    | 9.066311167 |
| PTPN18     | NM_014369    | 85.1507537  | 16.45902312 | 0.000138439 | 5.173499854 |
| ANAPC4     | NM_013367    | 93.11689181 | 3.407968232 | 7.80E-09    | 27.32328633 |
| VAMP1      | NM_199245    | 93.55404248 | 16.6553932  | 4.83E-05    | 5.617041961 |
| NT5DC1     | NM_152729    | 149.414435  | 1.829944476 | 8.68E-14    | 81.64970959 |
| SLMO2      | NM_016045    | 79.37036901 | 5.734578242 | 2.20E-06    | 13.84066372 |
| CCNJL      | NM_024565    | 44.34833603 | 6.122746553 | 0.002727013 | 7.243209504 |
| RGL1       | NM_001297672 | 52.31447414 | 0.687722924 | 1.29E-05    | 76.06911486 |
| ERMAP      | NM_001017922 | 124.1071429 | 5.611187237 | 1.03E-10    | 22.11780459 |
| COX7A2L    | NM_004718    | 58.5320095  | 3.618767378 | 7.59E-05    | 16.17457089 |
| C19orf60   | NM_001100419 | 112.1579357 | 27.71291713 | 0.000113749 | 4.04713568  |
| MON2       | NM_001278472 | 129.8875276 | 2.069238366 | 7.26E-12    | 62.77069366 |
| ATRX       | NM_000489    | 67.37244898 | 0.885883359 | 3.96E-07    | 76.05115084 |
| RPAP2      | NM_024813    | 132.9962952 | 2.52696995  | 1.57E-12    | 52.63073873 |

|              |              |             |             |             |             |
|--------------|--------------|-------------|-------------|-------------|-------------|
| LETMD1       | NR_045018    | 116.5781554 | 7.215966914 | 3.81E-09    | 16.15558342 |
| RNF217-AS1   | NR_026876    | 35.94504724 | 1.926045148 | 0.003138851 | 18.66261924 |
| MAN1B1       | NR_045720    | 65.18669554 | 14.90845953 | 0.001768269 | 4.372463527 |
| SIN3A        | NM_015477    | 41.67671904 | 4.39633877  | 0.004703945 | 9.479869777 |
| TSEN15       | NR_125335    | 132.5591446 | 2.81762957  | 1.18E-12    | 47.04633497 |
| WHSC1L1      | NM_017778    | 90.00812411 | 2.50994248  | 1.84E-08    | 35.8606322  |
| MANEAL       | NM_001113482 | 59.40631088 | 13.12132464 | 0.003167806 | 4.52746293  |
| BPGM         | NM_199186    | 83.79058876 | 2.112202461 | 4.37E-08    | 39.66977139 |
| CCT2         | NM_001198842 | 119.2497724 | 4.568907577 | 3.29E-11    | 26.10028117 |
| C7orf49      | NM_001243751 | 123.7187051 | 28.23473622 | 2.43E-05    | 4.381790718 |
| TRAF4        | NM_004295    | 208.3348823 | 28.97049718 | 1.26E-11    | 7.191277423 |
| UPF3A        | NM_023011    | 74.95014928 | 8.629146565 | 3.01E-05    | 8.685696635 |
| PRKXP1       | NR_073405    | 20.83835952 | 0.075746066 | 0.003228011 | 275.1081441 |
| PTPN6        | NM_080548    | 94.86549455 | 18.26209455 | 7.55E-05    | 5.194666708 |
| SNX22        | NR_073534    | 119.6869232 | 28.56010027 | 4.82E-05    | 4.190703886 |
| CENPM        | NM_024053    | 75.38729997 | 15.9525313  | 0.0007012   | 4.725726503 |
| NMT2         | NM_004808    | 101.5201806 | 4.870941882 | 1.90E-08    | 20.84200203 |
| SCAMP4       | NM_079834    | 114.8295527 | 18.33261285 | 2.46E-06    | 6.263676305 |
| SNAPIN       | NR_052020    | 108.6120173 | 25.34902158 | 0.000134884 | 4.284663098 |
| RASAL2       | NM_170692    | 47.45710371 | 2.331818432 | 0.00037861  | 20.35197211 |
| MUL1         | NM_024544    | 125.0301571 | 11.74330608 | 1.41E-08    | 10.64692994 |
| ZNF354A      | NM_005649    | 109.049168  | 2.019725558 | 9.60E-12    | 53.99207213 |
| SNX6         | NM_152233    | 118.375471  | 5.354850428 | 1.05E-09    | 22.10621428 |
| SYS1         | NM_001099791 | 64.74954487 | 8.62869194  | 0.000429739 | 7.503981521 |
| POLD2        | NM_001127218 | 92.67974111 | 14.62012892 | 2.66E-05    | 6.33918768  |
| LOC100133315 | NR_029192    | 66.49814761 | 6.533856692 | 5.08E-05    | 10.17747262 |
| RNF113A      | NM_006978    | 59.40631088 | 9.524711564 | 0.003846354 | 6.237071903 |
| BICD1        | NM_001714    | 52.31447414 | 1.995285166 | 0.000199225 | 26.2190463  |
| PATZ1        | NM_032050    | 127.2159105 | 8.851835441 | 1.27E-09    | 14.37169854 |
| MYNN         | NR_033702    | 129.8875276 | 3.246162383 | 1.32E-12    | 40.01264022 |
| NUDT4P1      | NR_002212    | 95.78850885 | 4.949661491 | 2.48E-08    | 19.35253734 |
| PLEKHA5      | NM_001143821 | 63.82653061 | 1.109447198 | 1.52E-06    | 57.53003    |
| WBSCR16      | NM_001281441 | 169.3297803 | 6.928894971 | 1.15E-14    | 24.43820855 |
| FAM120A      | NM_001286723 | 46.09693877 | 4.169681717 | 0.002696228 | 11.05526558 |
| M1AP         | NM_138804    | 75.38729997 | 4.294869626 | 8.55E-06    | 17.55287274 |
| TPP2         | NM_003291    | 63.38937993 | 1.806454059 | 1.14E-05    | 35.09050209 |
| MYBL2        | NM_002466    | 116.5781554 | 8.001186216 | 6.63E-09    | 14.57010902 |
| ATP5J2       | NM_004889    | 112.1579357 | 11.13418957 | 6.39E-08    | 10.07329137 |
| XPNPEP1      | NM_001167604 | 60.76647581 | 3.823418155 | 2.61E-05    | 15.89323306 |
| MMAA         | NM_172250    | 52.31447414 | 2.693451478 | 0.000131063 | 19.4228389  |
| ACTN1-AS1    | NR_073422    | 48.76855577 | 4.567909487 | 0.000547855 | 10.67634022 |
| QSOX1        | NM_001004128 | 93.99119317 | 10.40332858 | 3.08E-06    | 9.034723112 |
| C2CD2L       | NM_001290474 | 59.40631088 | 14.06168859 | 0.003674936 | 4.224692539 |
| RDH14        | NM_020905    | 54.98609113 | 5.900921143 | 0.000525368 | 9.318221646 |
| TNFRSF10D    | NM_003840    | 154.2718054 | 9.449012577 | 9.97E-12    | 16.32676474 |
| PPM1H        | NM_020700    | 74.02713503 | 2.668260856 | 1.64E-06    | 27.74358993 |
| OSBPL8       | NM_020841    | 98.8485636  | 3.576044581 | 7.10E-09    | 27.64187117 |
| GTF2I        | NM_001518    | 74.95014928 | 3.94452922  | 1.41E-06    | 19.00103792 |
| CEP41        | NM_001257160 | 58.96916018 | 7.325495773 | 0.000479279 | 8.049852462 |
| PDIA5        | NR_028444    | 86.89935644 | 6.644660713 | 9.32E-07    | 13.07807279 |
| MAPK6        | NM_002748    | 62.07792787 | 2.540892082 | 9.94E-06    | 24.4315484  |
| ZNF544       | NM_014480    | 79.41908188 | 8.46129029  | 1.10E-05    | 9.386166786 |
| S1PR2        | NM_004230    | 69.60691528 | 11.73804599 | 0.000701762 | 5.930025777 |
| TMEM60       | NM_032936    | 36.38219793 | 2.135803726 | 0.00251648  | 17.03442946 |
| DLG          | NM_001289752 | 39.49096561 | 2.778669845 | 0.001561271 | 14.21218346 |
| SNX11        | NM_152244    | 141.0111462 | 8.281874538 | 4.70E-11    | 17.02647698 |
| RNF139-AS1   | NR_108047    | 96.66281017 | 12.73998147 | 3.09E-06    | 7.587358773 |
| DNAL4        | NM_005740    | 89.57097344 | 9.925075528 | 5.02E-06    | 9.024714541 |
| GTF2A1       | NM_001278940 | 129.8875276 | 2.74992166  | 1.84E-12    | 47.23317375 |
| CDC23        | NM_004661    | 47.8942544  | 4.817508825 | 0.001218342 | 9.941705587 |
| KCNQ2        | NM_004518    | 73.15283366 | 13.10104053 | 0.000466346 | 5.583742261 |
| USP46        | NM_022832    | 46.09693877 | 3.283631852 | 0.000587446 | 14.03840042 |

|              |              |             |             |             |             |
|--------------|--------------|-------------|-------------|-------------|-------------|
| LACE1        | NM_145315    | 61.64077717 | 2.165053982 | 1.72E-05    | 28.47078072 |
| ITGA6        | NM_001079818 | 126.8274728 | 3.737747747 | 1.54E-11    | 33.93152276 |
| LOC100288842 | NR_027442    | 144.071201  | 2.670484561 | 1.02E-15    | 53.94946037 |
| ARL2BP       | NM_012106    | 72.27853228 | 9.212129381 | 9.59E-05    | 7.846017929 |
| ZNRF1        | NM_032268    | 92.19387756 | 6.279861269 | 2.98E-07    | 14.68087806 |
| LOC101927045 | NR_110032    | 54.98609113 | 1.606298899 | 6.29E-05    | 34.23154382 |
| UBAP2L       | NM_001287816 | 88.64795919 | 5.86961624  | 3.85E-07    | 15.10285435 |
| WNK1         | NM_001184985 | 105.066099  | 3.434979287 | 1.87E-09    | 30.58711282 |
| IPO4         | NM_024658    | 136.9793643 | 25.1645183  | 5.27E-07    | 5.443353322 |
| EPM2A        | NM_001018041 | 72.71568297 | 2.101672253 | 2.11E-06    | 34.59896416 |
| JMY          | NM_152405    | 44.34833603 | 3.075528579 | 0.000611209 | 14.41974441 |
| APPL2        | NM_018171    | 119.2497724 | 6.814252014 | 3.91E-09    | 17.50005315 |
| IFRD1        | NR_120333    | 206.1491289 | 4.399250994 | 4.03E-20    | 46.86005167 |
| PPARA        | NM_005036    | 42.11386972 | 5.945491529 | 0.004868133 | 7.083328521 |
| TRAPPC6B     | NM_001079537 | 108.1748666 | 5.345859484 | 1.74E-09    | 20.23526188 |
| GTF3A        | NM_002097    | 65.62384623 | 13.37082357 | 0.001371987 | 4.907988345 |
| USP3         | NM_001256702 | 66.93529829 | 4.124779402 | 4.97E-05    | 16.22760681 |
| RABGGTA      | NM_182836    | 96.66281017 | 22.61321546 | 0.000175206 | 4.274615892 |
| SLC19A1      | NM_194255    | 106.377551  | 12.96752144 | 1.13E-06    | 8.203383471 |
| SH3GL1       | NM_003025    | 115.2667034 | 20.03729122 | 3.39E-06    | 5.752609078 |
| POLDIP3      | NR_103820    | 136.9793643 | 12.46138033 | 2.58E-09    | 10.9923107  |
| YES1         | NM_005433    | 82.91628738 | 1.077629661 | 5.91E-09    | 76.94321189 |
| YIPF5        | NM_001024947 | 33.71058093 | 2.357012663 | 0.003510789 | 14.30224855 |
| DARS2        | NM_018122    | 66.06099693 | 4.739687726 | 3.62E-05    | 13.93783741 |
| NFXL1        | NM_001278624 | 100.6458792 | 2.336466057 | 2.39E-09    | 43.07611442 |
| SPAST        | NM_014946    | 37.69364998 | 1.406378006 | 0.003314175 | 26.80193363 |
| MAGI3        | NM_152900    | 59.40631088 | 1.586182046 | 3.16E-05    | 37.45239144 |
| CCNC         | NM_001013399 | 92.67974111 | 4.866669605 | 1.01E-07    | 19.04377092 |
| LGMN         | NM_001008530 | 72.71568297 | 4.641564401 | 1.21E-05    | 15.66620146 |
| DCAF16       | NM_017741    | 96.22565948 | 2.190437676 | 3.05E-10    | 43.92987783 |
| RPL14        | NM_003973    | 132.9962952 | 16.70227489 | 5.14E-08    | 7.962765317 |
| PPAPDC1B     | NM_032483    | 105.5032497 | 3.701246863 | 2.55E-10    | 28.50478597 |
| LACC1        | NM_001128303 | 115.2667034 | 2.29875996  | 1.08E-11    | 50.14299246 |
| CAPN10       | NM_023085    | 79.8075197  | 15.7287579  | 0.000308827 | 5.073987419 |
| CBWD2        | NM_172003    | 30.60181325 | 0.350769309 | 0.000865077 | 87.24199212 |
| POLH         | NM_006502    | 79.8075197  | 4.708680043 | 1.94E-06    | 16.94902159 |
| TBC1D4       | NM_001286658 | 65.18669554 | 2.005766166 | 8.89E-06    | 32.49964859 |
| SPTBN1       | NM_003128    | 74.46428571 | 4.023409429 | 1.67E-06    | 18.50775742 |
| LRFN3        | NM_024509    | 55.86039251 | 9.065808012 | 0.001726254 | 6.16165624  |
| DGKD         | NM_152879    | 70.91836734 | 6.498685865 | 1.77E-05    | 10.91272433 |
| MATN2        | NM_002380    | 79.37036901 | 6.641497571 | 3.30E-06    | 11.9506735  |
| LMTK2        | NM_014916    | 95.78850885 | 3.829678776 | 1.00E-08    | 25.01215231 |
| ENTPD4       | NM_004901    | 95.30264523 | 5.592916952 | 6.76E-08    | 17.03988206 |
| POLE2        | NM_001197331 | 118.8126218 | 4.495345642 | 2.31E-10    | 26.43014158 |
| NAA25        | NM_024953    | 80.2446704  | 4.926988892 | 2.64E-06    | 16.28675691 |
| HRH1         | NM_001098213 | 44.78548671 | 5.58908265  | 0.002869072 | 8.013029958 |
| CHAF1A       | NM_005483    | 95.78850885 | 11.73350374 | 1.82E-06    | 8.163674806 |
| CFAP36       | NM_080667    | 40.80241766 | 3.551467882 | 0.001599214 | 11.48888826 |
| PXDN         | NM_012293    | 48.76855577 | 1.994157573 | 0.000317082 | 24.45571826 |
| MRPS16       | NM_016065    | 94.42834386 | 23.1405534  | 0.000418037 | 4.080643286 |
| TSNARE1      | NM_145003    | 53.18877551 | 9.830657726 | 0.001999928 | 5.410500192 |
| PITX1        | NM_002653    | 101.9573313 | 18.86733594 | 2.16E-05    | 5.403907135 |
| PDE12        | NM_177966    | 138.7766799 | 11.75232524 | 6.05E-10    | 11.80844446 |
| G6PC         | NM_001270397 | 37.69364998 | 3.2036983   | 0.002221824 | 11.76566782 |
| FBXO22       | NM_147188    | 136.1050629 | 6.575729699 | 4.55E-11    | 20.6980927  |
| NDUFB5       | NM_001199958 | 63.87524348 | 0.693659535 | 3.36E-07    | 92.08443082 |
| ERVK13-1     | NR_040023    | 116.1410048 | 10.23869762 | 1.17E-08    | 11.34333771 |
| CAMKMT       | NM_024766    | 58.09485881 | 2.079008065 | 6.25E-05    | 27.94354664 |
| SCML2        | NM_006089    | 34.58488231 | 0.844532441 | 0.000915759 | 40.95151427 |
| ESPN         | NM_031475    | 193.7140581 | 27.96473579 | 8.16E-11    | 6.927083438 |
| SMS          | NM_001258423 | 56.29754319 | 2.28063142  | 3.81E-05    | 24.68506866 |
| STIM2        | NM_001169118 | 58.96916018 | 3.1251523   | 3.22E-05    | 18.86921165 |

|          |              |             |             |             |             |
|----------|--------------|-------------|-------------|-------------|-------------|
| SLC39A3  | NM_144564    | 96.66281017 | 14.74786055 | 7.05E-06    | 6.554361552 |
| VASP     | NM_003370    | 100.6458792 | 15.74002226 | 9.99E-06    | 6.394265369 |
| PHF14    | NR_033436    | 36.8193486  | 1.405259644 | 0.003705444 | 26.20110009 |
| POMGNT1  | NM_017739    | 100.6458792 | 15.11924473 | 5.54E-06    | 6.656806013 |
| CMTM7    | NM_181472    | 83.79058876 | 5.968400697 | 1.42E-06    | 14.03903541 |
| ICT1     | NM_001545    | 166.7068761 | 13.21922101 | 9.41E-12    | 12.61094553 |
| RAB23    | NM_001278667 | 51.00302207 | 6.156063182 | 0.00080344  | 8.285006272 |
| MRPL17   | NM_022061    | 122.7956908 | 17.56442196 | 4.75E-07    | 6.991160375 |
| TMC6     | NM_001127198 | 106.8634146 | 26.66505508 | 0.000192418 | 4.007620247 |
| SLC25A36 | NM_018155    | 108.6120173 | 1.375934391 | 2.79E-11    | 78.93691593 |
| UBXN11   | NM_001077262 | 58.96916018 | 13.37913487 | 0.004620668 | 4.407546585 |
| TMEM17   | NM_198276    | 47.01995303 | 3.672935665 | 0.000704678 | 12.80173608 |
| UAP1     | NM_003115    | 68.29546324 | 4.52373173  | 2.03E-05    | 15.09715149 |
| BTBD10   | NM_032320    | 53.23748838 | 2.033109912 | 8.02E-05    | 26.18524855 |
| SERPINE1 | NM_000602    | 66.93529829 | 13.46257041 | 0.001431348 | 4.9719553   |
| GPR108   | NM_001080452 | 62.07792787 | 15.04807147 | 0.00491015  | 4.125307883 |
| PHF21A   | NM_001101802 | 40.36526697 | 1.938891517 | 0.002113804 | 20.81873411 |
| OSR2     | NM_001142462 | 120.6099374 | 14.53856187 | 2.02E-07    | 8.295864373 |
| TFDP2    | NM_001178138 | 92.19387756 | 2.400183727 | 3.82E-08    | 38.41117516 |
| ZC3H6    | NM_198581    | 102.8803456 | 3.291243836 | 1.75E-09    | 31.25880387 |
| RGPD5    | NM_005054    | 234.9536265 | 15.45937246 | 1.66E-16    | 15.1981348  |
| PRKD2    | NM_001079880 | 63.38937993 | 13.35178311 | 0.003106349 | 4.747634034 |
| ASAP3    | NM_001143778 | 77.13590271 | 7.32694668  | 2.20E-05    | 10.52770084 |
| ANGPTL4  | NR_104213    | 140.5252827 | 15.35530013 | 6.03E-09    | 9.151581637 |
| HDAC2    | NR_033441    | 109.049168  | 3.720898747 | 1.99E-09    | 29.3072119  |
| FAM115A  | NM_001206938 | 101.5201806 | 3.690216584 | 1.21E-08    | 27.51062933 |
| EIF2AK1  | NM_014413    | 112.1579357 | 7.399818595 | 1.62E-08    | 15.15684935 |
| ERAP1    | NM_016442    | 98.41141291 | 3.682076497 | 3.95E-08    | 26.72715056 |
| SLAIN2   | NM_020846    | 95.30264523 | 2.185926324 | 1.07E-08    | 43.59828792 |
| DAP3     | NM_004632    | 108.6120173 | 5.282491474 | 4.87E-09    | 20.56075582 |
| SLC38A7  | NM_018231    | 74.02713503 | 7.615534569 | 2.34E-05    | 9.720543497 |
| C16orf95 | NM_001195125 | 153.3975041 | 10.91864064 | 1.73E-11    | 14.04913938 |
| CCDC113  | NM_001142302 | 43.91118534 | 5.726776649 | 0.004319187 | 7.667696513 |
| BZW1     | NM_001207069 | 144.9455024 | 5.74937621  | 2.52E-13    | 25.21064844 |
| TCEA2    | NM_003195    | 128.5760755 | 23.66927855 | 2.64E-06    | 5.43219242  |
| SGSM3    | NM_015705    | 82.4791367  | 7.748860901 | 6.31E-06    | 10.64403372 |
| LUZP6    | NM_001128619 | 58.5320095  | 0.296216602 | 2.40E-07    | 197.5986798 |
| GSE1     | NM_001134473 | 93.55404248 | 20.86304773 | 0.000116086 | 4.484198268 |
| CEP55    | NM_001127182 | 114.8295527 | 6.328663434 | 6.51E-09    | 18.1443608  |
| EIF4G3   | NM_001198801 | 136.5422136 | 3.624159071 | 3.73E-12    | 37.67555755 |
| LIMA1    | NM_016357    | 79.8075197  | 4.080999207 | 2.72E-06    | 19.55587729 |
| PAWR     | NM_002583    | 119.6869232 | 3.760255493 | 6.80E-11    | 31.82946568 |
| UNC119B  | NM_001080533 | 175.5473156 | 8.648780288 | 7.00E-14    | 20.29734943 |
| RPS6KC1  | NM_001287221 | 39.9281163  | 0.977290481 | 0.000285965 | 40.85593495 |
| C11orf57 | NM_001301021 | 93.11689181 | 10.07306079 | 1.01E-06    | 9.244150686 |
| NAA35    | NM_024635    | 97.97426223 | 3.851453777 | 8.67E-09    | 25.43825472 |
| SLC3A2   | NM_001012664 | 86.89935644 | 13.16668404 | 5.31E-05    | 6.599942415 |
| THG1L    | NM_017872    | 55.42324183 | 6.363177851 | 0.0008102   | 8.709994144 |
| MAVS     | NM_001206491 | 103.3174962 | 23.15151276 | 6.32E-05    | 4.462667182 |
| PUS1     | NM_001002020 | 80.68182108 | 15.23833713 | 0.000330683 | 5.294660459 |
| DDX42    | NM_203499    | 181.3277003 | 8.924587012 | 9.50E-14    | 20.31776934 |
| SETD9    | NM_153706    | 47.45710371 | 5.726801366 | 0.002503262 | 8.286842982 |
| PAK1     | NM_002576    | 48.76855577 | 3.69965696  | 0.000365383 | 13.18191289 |
| COMT     | NM_000754    | 147.6171194 | 17.97966491 | 5.24E-09    | 8.210226394 |
| STK4     | NM_006282    | 81.11897176 | 2.703292456 | 3.67E-07    | 30.00747165 |
| PSMC5    | NM_001199163 | 151.6489013 | 32.54714649 | 1.82E-06    | 4.659360886 |
| XRR1A1   | NM_001270380 | 67.85831254 | 3.557964815 | 4.77E-06    | 19.07222698 |
| SOS1     | NM_005633    | 52.75162482 | 2.62169513  | 0.000188768 | 20.12118962 |
| TUBA4B   | NR_003063    | 58.5320095  | 10.06298283 | 0.002659675 | 5.816566568 |
| LAMTOR3  | NR_024170    | 60.28061224 | 1.702492854 | 3.60E-06    | 35.40726301 |
| SMIM15   | NM_001048249 | 78.93321834 | 2.002418222 | 2.42E-08    | 39.41894729 |
| SPEF1    | NM_015417    | 66.93529829 | 10.7752739  | 0.000488897 | 6.211934742 |



|           |              |             |             |             |             |
|-----------|--------------|-------------|-------------|-------------|-------------|
| TEP1      | NM_007110    | 109.049168  | 6.414179259 | 3.23E-08    | 17.00126604 |
| CRYL1     | NM_015974    | 76.69875203 | 3.921255893 | 8.05E-07    | 19.5597416  |
| ARMC2     | NM_001286609 | 47.45710371 | 4.85623239  | 0.001646873 | 9.772412006 |
| TOR1AIP1  | NM_001267578 | 111.2836343 | 6.848204001 | 1.56E-08    | 16.25004662 |
| STON2     | NM_001256430 | 30.16466256 | 0.991704185 | 0.002006957 | 30.41699634 |
| GLE1      | NM_001003722 | 98.89727652 | 6.438383533 | 1.60E-07    | 15.36057552 |
| PRICKLE1  | NM_153026    | 45.65978809 | 0.193627068 | 1.82E-05    | 235.8130425 |
| TRIM45    | NM_025188    | 57.65770813 | 5.303713166 | 0.000112817 | 10.87119652 |
| TOB2P1    | NR_002936    | 45.65978809 | 5.780727428 | 0.00221765  | 7.898623254 |
| MED1      | NM_004774    | 43.03688397 | 5.835655137 | 0.004555386 | 7.374816188 |
| TXNRD3    | NM_001173513 | 96.66281017 | 2.903670435 | 3.96E-09    | 33.28986961 |
| IRAK2     | NM_001570    | 50.5658714  | 5.479672405 | 0.000905484 | 9.227900441 |
| MPC2      | NR_026550    | 44.34833603 | 2.527294967 | 0.00030724  | 17.54774833 |
| NOM1      | NM_138400    | 110.8464837 | 8.832000815 | 5.81E-08    | 12.5505518  |
| MAP2K1    | NM_002755    | 130.7618289 | 6.473801617 | 8.01E-11    | 20.19861539 |
| RFC4      | NM_002916    | 80.2446704  | 9.156285883 | 2.88E-05    | 8.763888702 |
| ZC3H18    | NM_144604    | 79.37036901 | 12.83456764 | 0.000169457 | 6.184109292 |
| KMT2A     | NM_005933    | 95.30264523 | 3.528141927 | 1.66E-08    | 27.01213477 |
| GBAS      | NM_001483    | 140.9624333 | 3.206686406 | 8.97E-13    | 43.95890819 |
| ACVR2B    | NM_001106    | 56.29754319 | 9.226376909 | 0.001033778 | 6.101803964 |
| CAPRIN1   | NM_203364    | 198.5714286 | 6.201411336 | 9.00E-17    | 32.02036082 |
| SIRT3     | NM_012239    | 125.9044585 | 10.81726192 | 3.31E-09    | 11.63921697 |
| ITSN2     | NM_006277    | 73.15283366 | 2.757608462 | 1.44E-06    | 26.52763605 |
| ZIC2      | NM_007129    | 70.48121666 | 15.49040078 | 0.001949847 | 4.5499931   |
| CEMIP     | NM_001293304 | 48.33140508 | 5.375547485 | 0.00169037  | 8.990973519 |
| MBNL1-AS1 | NR_027037    | 74.02713503 | 14.40148465 | 0.000580953 | 5.140243303 |
| CLTCL1    | NM_001835    | 69.60691528 | 5.796549646 | 3.10E-05    | 12.00833591 |
| RPL19     | NM_000981    | 153.3975041 | 34.05536478 | 1.23E-06    | 4.504356512 |
| PAIP1     | NM_006451    | 152.9603533 | 2.723554716 | 9.20E-15    | 56.16202695 |
| LINC01124 | NR_027433    | 37.69364998 | 0.883629617 | 0.000402576 | 42.65774851 |
| LITAF     | NR_024320    | 110.4093329 | 5.963180963 | 2.35E-09    | 18.51517397 |
| SNHG20    | NR_027058    | 70.52992954 | 17.44277835 | 0.002495848 | 4.043503169 |
| ERLEC1    | NM_001127398 | 62.95222924 | 1.690037115 | 4.63E-06    | 37.24902173 |
| CNST      | NM_152609    | 41.23956835 | 1.915707644 | 0.001947804 | 21.5270678  |
| SLC25A46  | NM_138773    | 113.0322371 | 1.512210613 | 1.40E-12    | 74.7463588  |
| LRTOMT    | NM_001145307 | 82.91628738 | 9.788111235 | 1.68E-05    | 8.471122302 |
| ZBED3     | NM_032367    | 71.8413816  | 4.601230608 | 2.86E-06    | 15.61351467 |
| GSKIP     | NM_016472    | 103.754647  | 2.539591658 | 1.92E-10    | 40.85485422 |
| AAED1     | NM_153698    | 59.84346156 | 1.778454866 | 2.91E-06    | 33.64913144 |
| ANAPC7    | NM_001137664 | 96.22565948 | 6.931054091 | 2.42E-07    | 13.88326483 |
| IL4I1     | NM_001258017 | 111.7207851 | 14.28231085 | 4.79E-07    | 7.82231855  |
| DAGLB     | NM_139179    | 57.22055744 | 9.98632133  | 0.003063695 | 5.729893476 |
| SENP3     | NM_015670    | 90.4452748  | 14.91765149 | 3.02E-05    | 6.06297009  |
| PTPRH     | NM_001161440 | 52.75162482 | 9.377708094 | 0.002850259 | 5.625215062 |
| TPX2      | NM_012112    | 50.5658714  | 2.87420912  | 0.000160205 | 17.59296881 |
| RABL2B    | NM_001130923 | 97.53711154 | 9.160057916 | 7.98E-07    | 10.64808896 |
| DMTF1     | NM_001142326 | 75.82445064 | 5.382469408 | 3.83E-06    | 14.08729802 |
| NADK2     | NM_001287340 | 40.80241766 | 1.588262134 | 0.001516232 | 25.68997697 |
| CCT7      | NM_006429    | 143.6340504 | 14.00018095 | 2.12E-09    | 10.25944242 |
| VWA9      | NM_001136043 | 79.8075197  | 3.596910236 | 1.21E-06    | 22.18779854 |
| MCEE      | NM_032601    | 72.71568297 | 5.803928996 | 8.46E-06    | 12.52869961 |
| ERICH2    | NR_110644    | 46.09693877 | 5.114427171 | 0.001141228 | 9.013118621 |
| PQLC1     | NM_001146345 | 98.8485636  | 6.641267754 | 1.97E-07    | 14.88399012 |
| TSPAN14   | NM_001128309 | 74.02713503 | 7.870143359 | 4.15E-05    | 9.406071994 |
| CD82      | NM_001024844 | 62.95222924 | 9.154739763 | 0.000368778 | 6.876462998 |
| DDB2      | NM_001300734 | 101.0830299 | 11.05397876 | 7.61E-07    | 9.144492866 |
| RNF138    | NM_016271    | 90.8824255  | 3.693108313 | 1.18E-07    | 24.60865423 |
| MEGF6     | NM_001409    | 77.13590271 | 15.34941631 | 0.000303255 | 5.025331331 |
| FRA10AC1  | NM_145246    | 70.04406598 | 0.938866438 | 2.07E-07    | 74.60493117 |
| PARL      | NM_001037639 | 111.7207851 | 4.435657649 | 2.46E-09    | 25.18697201 |
| HPSE      | NM_001098540 | 40.36526697 | 3.261009637 | 0.001813289 | 12.37815016 |
| RBM8A     | NM_005105    | 100.6458792 | 16.38422886 | 9.87E-06    | 6.142851158 |

|           |              |             |             |             |             |
|-----------|--------------|-------------|-------------|-------------|-------------|
| CYB561D1  | NM_182580    | 75.82445064 | 11.95573951 | 8.79E-05    | 6.342096244 |
| HPCAL4    | NM_001282397 | 41.72543191 | 3.98014219  | 0.002737795 | 10.48340233 |
| CNOT4     | NM_001190849 | 93.11689181 | 2.351029042 | 1.75E-08    | 39.60686582 |
| KLF6      | NM_001160124 | 69.60691528 | 13.95847024 | 0.001932257 | 4.986715168 |
| ASB7      | NM_198243    | 61.64077717 | 4.496626194 | 7.66E-05    | 13.70822802 |
| QRSL1     | NM_018292    | 61.64077717 | 2.343091535 | 8.08E-06    | 26.30745587 |
| VPS51     | NM_013265    | 129.0132262 | 14.55300812 | 3.12E-08    | 8.865055604 |
| MRGBP     | NM_018270    | 126.7787599 | 21.84900853 | 2.71E-06    | 5.80249487  |
| 11-Sep    | NM_018243    | 109.049168  | 4.737032127 | 6.96E-09    | 23.02056754 |
| GNL3      | NM_014366    | 102.8803456 | 14.72232833 | 2.57E-06    | 6.988048578 |
| KDM5C     | NM_004187    | 46.09693877 | 5.314951627 | 0.002434388 | 8.673068357 |
| C21orf91  | NM_001100421 | 112.1579357 | 3.964243253 | 8.94E-10    | 28.29239493 |
| CDC16     | NM_003903    | 104.1917976 | 4.37366728  | 1.04E-08    | 23.82252488 |
| USP34     | NM_014709    | 63.38937993 | 4.888823969 | 0.00010489  | 12.96618171 |
| CEP170B   | NM_015005    | 118.8126218 | 18.93813263 | 1.10E-06    | 6.273724243 |
| ZNF92     | NM_001287533 | 65.18669554 | 3.806347201 | 2.73E-05    | 17.12578809 |
| UBA3      | NM_003968    | 138.2908163 | 3.237501317 | 6.78E-13    | 42.71529267 |
| RET       | NM_020975    | 116.1410048 | 8.024038757 | 7.00E-09    | 14.47413307 |
| SMG1      | NM_015092    | 160.9264914 | 2.621056587 | 9.01E-15    | 61.39756471 |
| BMP2K     | NM_198892    | 83.79058876 | 1.78108358  | 1.71E-07    | 47.04472587 |
| RIF1      | NM_001177663 | 55.4719547  | 4.111645697 | 0.000475706 | 13.49142382 |
| ANKRD11   | NM_001256182 | 184.8736186 | 14.69086766 | 7.13E-13    | 12.58425458 |
| VKORC1L1  | NM_173517    | 113.4693878 | 2.670030945 | 1.49E-10    | 42.4974055  |
| ASPSCR1   | NM_001251888 | 124.5930065 | 23.61650578 | 3.85E-06    | 5.275674888 |
| MTRR      | NM_002454    | 36.38219793 | 0.885535209 | 0.000230479 | 41.08498177 |
| FAM177A1  | NM_173607    | 97.09996085 | 4.051575307 | 3.33E-08    | 23.96597706 |
| LINC00471 | NR_024079    | 90.8824255  | 9.225964435 | 2.26E-06    | 9.85072359  |
| KLHL32    | NR_104421    | 27.93019625 | 0.39027979  | 0.003483487 | 71.56454676 |
| HMG20A    | NM_018200    | 97.53711154 | 2.10558409  | 3.84E-09    | 46.32306636 |
| RELL1     | NM_001085400 | 105.5032497 | 3.631784267 | 1.19E-09    | 29.04997706 |
| MINK1     | NM_153827    | 99.7715779  | 11.83829402 | 1.22E-06    | 8.427867876 |
| MLLT4     | NM_001207008 | 63.38937993 | 2.517742166 | 1.61E-05    | 25.17707364 |
| DDAH1     | NM_012137    | 140.5252827 | 3.464095046 | 1.20E-12    | 40.56623183 |
| BECN1     | NM_003766    | 164.9095605 | 7.002868463 | 5.59E-14    | 23.54885878 |
| TXLNA     | NM_175852    | 146.742818  | 15.28333927 | 1.33E-09    | 9.601489268 |
| CCAR2     | NR_033902    | 97.09996085 | 19.5176159  | 4.88E-05    | 4.974990867 |
| SSH1      | NM_018984    | 116.5781554 | 9.5431742   | 4.39E-08    | 12.21586791 |
| IQGAP3    | NM_178229    | 86.02505507 | 10.58186979 | 1.66E-05    | 8.129475868 |
| NR2C1     | NM_001032287 | 56.78340675 | 4.412414751 | 0.000238506 | 12.86900937 |
| SPG11     | NM_025137    | 94.91420746 | 4.49490232  | 1.43E-07    | 21.11596665 |
| ZNF670    | NM_033213    | 47.8942544  | 3.9136746   | 0.000296644 | 12.23766902 |
| KCTD2     | NR_110834    | 84.22773945 | 14.64746648 | 0.000216872 | 5.750328193 |
| ATIC      | NM_004044    | 87.77365781 | 3.331200993 | 2.60E-08    | 26.34895282 |
| CPSF4     | NM_001081559 | 71.40423091 | 17.70235867 | 0.003764692 | 4.033599829 |
| RDH13     | NR_027382    | 79.8075197  | 14.17929746 | 0.000127871 | 5.62845373  |
| ZKSCAN5   | NM_014569    | 44.78548671 | 6.008010702 | 0.002410078 | 7.454295429 |
| L2HGDH    | NM_024884    | 94.86549455 | 2.777907885 | 1.13E-08    | 34.1499785  |
| SMOX      | NM_175841    | 100.6458792 | 12.1502254  | 3.81E-06    | 8.28345779  |
| MFSD8     | NM_152778    | 36.8193486  | 3.771738641 | 0.003513475 | 9.761903489 |
| ALG1      | NM_019109    | 161.3636422 | 9.969074146 | 4.55E-12    | 16.18642211 |
| PHRF1     | NM_001286583 | 133.8705966 | 16.11928148 | 2.36E-08    | 8.304997762 |
| ZMYND12   | NM_032257    | 58.96916018 | 8.180590278 | 0.000527716 | 7.20842362  |
| CENPN     | NM_018455    | 111.7207851 | 8.787049953 | 3.61E-08    | 12.71425401 |
| ZMYM2     | NM_001190965 | 81.11897176 | 3.564353497 | 4.35E-07    | 22.75839695 |
| RAB5A     | NM_004162    | 52.31447414 | 0.518255069 | 2.45E-06    | 100.9434877 |
| NOMO2     | NM_001004060 | 102.8803456 | 4.492927769 | 1.77E-08    | 22.89828612 |
| NDUFAF1   | NM_016013    | 127.7017741 | 7.441660619 | 4.92E-10    | 17.16038673 |
| PDDC1     | NM_182612    | 117.0153061 | 21.72904222 | 7.72E-06    | 5.385203128 |
| TMEM18    | NM_152834    | 93.99119317 | 8.537654469 | 6.35E-07    | 11.00901817 |
| SCARA3    | NM_016240    | 68.29546324 | 9.256507511 | 0.000114587 | 7.378102719 |
| DPH6-AS1  | NR_038251    | 41.23956835 | 0.19557475  | 0.000186483 | 210.8634596 |
| LSM14A    | NM_001114093 | 136.5422136 | 3.821752307 | 7.22E-12    | 35.72764603 |

|              |              |             |             |             |             |
|--------------|--------------|-------------|-------------|-------------|-------------|
| ALDH2        | NM_000690    | 95.73979591 | 7.152338512 | 3.41E-07    | 13.38580322 |
| GUSBP11      | NR_024448    | 93.99119317 | 8.458080225 | 8.47E-07    | 11.11259183 |
| MIR22HG      | NR_028505    | 186.6222214 | 33.91070084 | 1.13E-08    | 5.503343098 |
| BTBD1        | NM_025238    | 114.392402  | 3.961075848 | 1.05E-09    | 28.87912435 |
| BAG5         | NM_001015049 | 47.01995303 | 5.466224021 | 0.003415275 | 8.601907431 |
| MBTPS2       | NM_015884    | 55.86039251 | 1.309832407 | 2.22E-05    | 42.64697698 |
| SSX2IP       | NM_001166294 | 101.5201806 | 5.074782766 | 1.54E-08    | 20.00483277 |
| COPE         | NM_199442    | 129.0132262 | 14.47037507 | 4.04E-08    | 8.915679483 |
| HMCES        | NM_020187    | 84.22773945 | 3.929979453 | 5.54E-07    | 21.43210682 |
| CHRCAC1      | NM_017444    | 219.8956517 | 26.57122199 | 5.07E-13    | 8.275707147 |
| ASCC2        | NM_001242906 | 113.9552513 | 9.142805738 | 1.32E-08    | 12.46392569 |
| ZNF148       | NM_021964    | 63.38937993 | 2.746660975 | 1.66E-05    | 23.07870557 |
| KIAA0391     | NM_014672    | 61.64077717 | 2.41904086  | 1.62E-05    | 25.48149483 |
| SLC18B1      | NM_052831    | 82.04198601 | 0.459447231 | 5.55E-10    | 178.5667221 |
| AHNAK2       | NM_138420    | 187.059372  | 14.11569099 | 2.63E-13    | 13.25187496 |
| FAM83F       | NM_138435    | 82.91628738 | 9.279512244 | 2.49E-05    | 8.935414405 |
| C12orf66     | NM_152440    | 105.066099  | 2.173455331 | 1.07E-10    | 48.34058352 |
| HIATL2       | NR_002894    | 108.6120173 | 4.542423646 | 5.56E-09    | 23.91058734 |
| ARMC1        | NM_001286702 | 73.20154654 | 3.382852056 | 6.29E-07    | 21.63900322 |
| PRRC1        | NM_130809    | 42.11386972 | 2.385641213 | 0.000838238 | 17.65306094 |
| MAN2C1       | NM_001256496 | 178.2189327 | 26.79339331 | 1.79E-09    | 6.651599917 |
| TMEM8B       | NM_016446    | 77.13590271 | 12.39514222 | 0.000200953 | 6.223075246 |
| PDPK1        | NM_031268    | 125.9044585 | 10.97297634 | 8.28E-09    | 11.47404811 |
| FHOD3        | NM_025135    | 45.65978809 | 1.461362269 | 0.000674371 | 31.24467426 |
| BIRC5        | NM_001012271 | 137.4652279 | 18.39456126 | 5.85E-08    | 7.473145237 |
| ZNF622       | NM_033414    | 82.91628738 | 2.819351772 | 1.06E-07    | 29.40969914 |
| D2HGDH       | NM_001287249 | 165.7838619 | 14.19619232 | 4.91E-11    | 11.67805128 |
| C17orf75     | NM_022344    | 155.5832575 | 2.195265964 | 4.50E-17    | 70.87216768 |
| STEAP3       | NM_001008410 | 78.05891695 | 11.63391027 | 8.40E-05    | 6.7096028   |
| ZNF749       | NM_001023561 | 77.13590271 | 3.539302939 | 4.02E-07    | 21.79409449 |
| ZNF428       | NM_182498    | 133.4821588 | 17.74376433 | 3.42E-08    | 7.52276441  |
| C7orf60      | NM_152556    | 48.76855577 | 2.588799293 | 0.000338809 | 18.83829152 |
| P4HB         | NM_000918    | 160.0521901 | 34.83089566 | 4.50E-07    | 4.595121286 |
| SHMT1        | NM_004169    | 72.71568297 | 7.745905549 | 6.02E-05    | 9.387628407 |
| ELOVL7       | NM_024930    | 67.85831254 | 2.35549889  | 3.85E-06    | 28.80846721 |
| TMEM126A     | NM_032273    | 51.00302207 | 7.95180415  | 0.00176289  | 6.414018896 |
| HES2         | NM_019089    | 151.1630377 | 21.61090767 | 1.97E-08    | 6.994756537 |
| SRSF7        | NM_001031684 | 136.5422136 | 19.93788105 | 1.12E-07    | 6.848381396 |
| FBL          | NM_001436    | 166.2210125 | 8.740394952 | 3.65E-13    | 19.0175631  |
| TCEA1        | NM_201437    | 37.69364998 | 3.421228251 | 0.003538944 | 11.01757826 |
| CA2          | NM_000067    | 82.4791367  | 2.162317752 | 1.23E-08    | 38.14385588 |
| WDR45        | NM_001029896 | 47.45710371 | 7.096941116 | 0.002153875 | 6.686980057 |
| LOC100288069 | NR_033908    | 48.76855577 | 2.416339545 | 0.000104301 | 20.182824   |
| NDUFS3       | NM_004551    | 132.1219938 | 17.89431113 | 1.39E-07    | 7.38346354  |
| YWHAE        | NR_024058    | 150.7258871 | 8.678174516 | 6.76E-12    | 17.36838626 |
| EPHX1        | NM_001136018 | 161.3636422 | 11.14642977 | 5.33E-12    | 14.47671098 |
| ERI2         | NM_080663    | 109.9721823 | 2.284526521 | 4.04E-11    | 48.13784444 |
| PMS2P1       | NR_003613    | 120.1240738 | 5.251785297 | 3.22E-10    | 22.87299785 |
| FIBP         | NM_004214    | 105.066099  | 19.57822077 | 2.23E-05    | 5.366478406 |
| HOMER1       | NM_001277077 | 45.22263741 | 2.84166308  | 0.000642131 | 15.91414469 |
| RAN          | NM_001300796 | 138.2908163 | 13.1928808  | 1.65E-09    | 10.48223041 |
| TRAF2        | NM_021138    | 88.64795919 | 15.81574344 | 0.00010221  | 5.605045349 |
| DYNLT1       | NM_006519    | 82.91628738 | 10.19515038 | 3.08E-05    | 8.132914603 |
| KCTD7        | NM_001167961 | 76.26160134 | 6.94425286  | 9.39E-06    | 10.98197357 |
| SDR42E1      | NM_145168    | 160.0521901 | 5.456188314 | 1.07E-14    | 29.33406636 |
| CRTAP        | NM_006371    | 74.02713503 | 3.723407697 | 4.69E-06    | 19.88155503 |
| YIF1B        | NM_001145463 | 66.93529829 | 15.4057248  | 0.00369066  | 4.344832792 |
| ACOXL        | NM_001142807 | 48.33140508 | 4.531335048 | 0.001733148 | 10.66604093 |
| LCA5         | NM_181714    | 25.74444283 | 0.444487892 | 0.00455413  | 57.91933429 |
| PARP3        | NM_005485    | 97.09996085 | 19.006651   | 6.38E-05    | 5.108735928 |
| PIP5K1A      | NM_003557    | 90.4452748  | 7.378584845 | 1.22E-06    | 12.25780779 |
| ABI2         | NM_001282925 | 46.14565165 | 2.655179789 | 0.000609809 | 17.37948287 |

|              |              |             |             |             |             |
|--------------|--------------|-------------|-------------|-------------|-------------|
| PCM1         | NM_006197    | 54.11178977 | 4.005332295 | 0.000105154 | 13.5099377  |
| UIMC1        | NM_001199297 | 112.5950864 | 4.379565884 | 3.95E-09    | 25.70918885 |
| CSK          | NM_004383    | 81.11897176 | 13.02976135 | 0.000129167 | 6.225668265 |
| IL17RA       | NM_001289905 | 93.55404248 | 5.407874362 | 7.08E-08    | 17.29959615 |
| LOXL2        | NM_002318    | 109.049168  | 6.031091964 | 8.63E-09    | 18.08116485 |
| DFNB59       | NM_001042702 | 61.2036265  | 1.066255657 | 4.53E-07    | 57.40051752 |
| WIBG         | NM_001143853 | 101.5201806 | 5.14746492  | 7.63E-09    | 19.72236473 |
| DHX57        | NM_198963    | 38.56795136 | 2.425779816 | 0.003536342 | 15.89919708 |
| BEX2         | NM_001168399 | 55.86039251 | 5.234123088 | 0.000803654 | 10.6723498  |
| HNRNPD       | NM_031369    | 84.27645233 | 9.634950948 | 1.94E-05    | 8.746951882 |
| PGBD1        | NM_001184743 | 109.049168  | 5.190977914 | 1.46E-09    | 21.00744211 |
| RPL23AP7     | NR_024528    | 36.38219793 | 2.615731601 | 0.00216453  | 13.90899506 |
| NDUFAF7      | NM_144736    | 114.8295527 | 4.667460184 | 1.91E-10    | 24.60214939 |
| CGGBP1       | NM_001008390 | 79.37036901 | 3.971814046 | 5.36E-07    | 19.98340509 |
| B4GALT6      | NM_004775    | 45.22263741 | 0.977021846 | 4.38E-05    | 46.28620905 |
| KBTBD2       | NM_015483    | 63.38937993 | 3.862534667 | 4.69E-05    | 16.41134265 |
| LOC100294362 | NR_029376    | 106.4262639 | 8.080549162 | 7.92E-08    | 13.17067216 |
| CRNDE        | NR_110453    | 34.58488231 | 2.489806926 | 0.003183329 | 13.89058804 |
| HYKK         | NM_001083612 | 75.82445064 | 2.947543751 | 2.52E-07    | 25.72462262 |
| RHBDD3       | NM_012265    | 110.8464837 | 22.98530564 | 1.80E-05    | 4.822493353 |
| DPP9         | NM_139159    | 100.2087285 | 16.62310973 | 1.44E-05    | 6.028278113 |
| TMEM39B      | NM_018056    | 115.2667034 | 7.208761569 | 6.88E-09    | 15.98980661 |
| TUBGCP3      | NM_001286277 | 139.6509813 | 4.589405533 | 1.02E-11    | 30.42899135 |
| COBLL1       | NM_001278461 | 72.71568297 | 0.483248069 | 7.90E-08    | 150.4727853 |
| DUSP1        | NM_004417    | 168.4554789 | 22.21629001 | 9.91E-10    | 7.582520701 |
| UBAP2        | NM_001282529 | 110.4093329 | 6.304527799 | 5.21E-09    | 17.51270459 |
| TCF7L1       | NM_031283    | 56.29754319 | 5.618170237 | 0.000318025 | 10.02061896 |
| RCC2         | NM_001136204 | 66.06099693 | 14.25893469 | 0.001873626 | 4.632954589 |
| DSG2         | NM_001943    | 109.9234694 | 2.958317594 | 3.06E-10    | 37.15742678 |
| STAT1        | NM_007315    | 92.67974111 | 6.449723904 | 2.07E-07    | 14.36956721 |
| GALK2        | NM_001289030 | 37.2564993  | 0.70785577  | 0.00048202  | 52.63289627 |
| SNAP47       | NM_053052    | 107.737716  | 12.30844239 | 8.17E-07    | 8.753155973 |
| MAST2        | NM_015112    | 38.56795136 | 4.213794774 | 0.00400342  | 9.15278352  |
| VANGL1       | NM_001172411 | 105.5032497 | 4.718467478 | 9.10E-09    | 22.35964328 |
| SNF8         | NM_007241    | 160.4893408 | 19.71272851 | 1.11E-09    | 8.141406741 |
| PLEKHO1      | NM_016274    | 62.51507855 | 10.36059442 | 0.000676577 | 6.033927785 |
| USP20        | NM_006676    | 62.07792787 | 10.21924351 | 0.001150127 | 6.074610885 |
| CYP4F11      | NM_001128932 | 54.98609113 | 6.795554651 | 0.001452556 | 8.091479496 |
| STRADB       | NM_001206864 | 75.82445064 | 3.652546313 | 2.09E-06    | 20.75933996 |
| XRCC5        | NM_021141    | 47.01995303 | 4.361428363 | 0.002760398 | 10.78086102 |
| GRK4         | NM_182982    | 51.87732345 | 4.886326338 | 0.000888722 | 10.61683561 |
| PIAS1        | NM_016166    | 54.98609113 | 3.585186768 | 0.000106887 | 15.33702278 |
| DSCC1        | NM_024094    | 106.4262639 | 6.611099868 | 2.68E-08    | 16.09811771 |
| PTBP3        | NM_001244898 | 37.69364998 | 3.781009649 | 0.003853249 | 9.969202271 |
| MLYCD        | NM_012213    | 47.8942544  | 8.379357579 | 0.00422627  | 5.715742997 |
| PAIP2B       | NM_020459    | 38.61666424 | 2.118196159 | 0.001623931 | 18.23091978 |
| PAQR8        | NM_133367    | 90.8824255  | 4.666725896 | 1.67E-07    | 19.47455829 |
| SENPI        | NR_051992    | 160.4893408 | 3.083274334 | 3.25E-15    | 52.05159303 |
| ZNF367       | NM_153695    | 121.4842387 | 2.893691389 | 3.62E-12    | 41.98244469 |
| SNHG16       | NR_038111    | 91.36828904 | 21.44272157 | 0.000537983 | 4.261039753 |
| WIP1         | NM_017983    | 73.58998434 | 8.982989739 | 3.62E-05    | 8.192148324 |
| CDC42EP4     | NM_012121    | 186.1850708 | 19.688668   | 1.92E-11    | 9.456458445 |
| KAT2B        | NM_003884    | 51.87732345 | 0.860897402 | 1.42E-05    | 60.25958882 |
| TBC1D15      | NM_022771    | 80.2446704  | 2.353392999 | 2.91E-07    | 34.09743737 |
| ZSCAN12      | NR_028077    | 41.67671904 | 4.869958524 | 0.003704498 | 8.557920736 |
| CD164L2      | NM_207397    | 112.1579357 | 26.10456825 | 0.00012999  | 4.296486907 |
| MSL2         | NM_018133    | 79.8075197  | 5.192456949 | 2.12E-06    | 15.36989531 |
| CHCHD1       | NM_203298    | 115.7038541 | 19.98736231 | 2.56E-05    | 5.788850591 |
| MRPL19       | NM_014763    | 79.8075197  | 3.865599739 | 4.81E-07    | 20.64557251 |
| UPF1         | NM_002911    | 154.7089561 | 16.82961273 | 5.50E-10    | 9.192662872 |
| GCLC         | NM_001197115 | 96.22565948 | 5.693549178 | 5.83E-08    | 16.9008217  |
| LAMP1        | NM_005561    | 65.18669554 | 10.80078596 | 0.000615816 | 6.035365923 |

|              |              |             |             |             |             |
|--------------|--------------|-------------|-------------|-------------|-------------|
| UBL3         | NM_007106    | 69.60691528 | 1.532558393 | 2.86E-06    | 45.41876879 |
| FLYWCH1      | NM_032296    | 52.31447414 | 9.097779685 | 0.002986463 | 5.750246318 |
| HEXDC        | NM_173620    | 197.2599765 | 21.72169888 | 2.05E-12    | 9.081240729 |
| HUWE1        | NM_031407    | 84.66489013 | 2.850663926 | 1.24E-07    | 29.70006017 |
| CMTM4        | NM_181521    | 56.29754319 | 5.652699385 | 0.000294192 | 9.959408657 |
| MYH14        | NM_001077186 | 65.62384623 | 6.520071324 | 5.58E-05    | 10.06489699 |
| N4BP1        | NM_153029    | 88.2108085  | 2.859877839 | 4.26E-08    | 30.84425751 |
| DSC3         | NM_024423    | 86.46220574 | 0.505442515 | 1.64E-10    | 171.0623923 |
| MBD2         | NM_015832    | 45.65978809 | 2.161039244 | 0.000298138 | 21.12862513 |
| IGHMBP2      | NM_002180    | 139.2138305 | 8.472585295 | 4.52E-11    | 16.43109225 |
| IPO7         | NM_006391    | 86.46220574 | 8.282269261 | 4.31E-06    | 10.43943429 |
| SGSH         | NM_000199    | 121.9213894 | 18.36652124 | 8.79E-07    | 6.638240736 |
| PRORSD1P     | NR_027258    | 51.00302207 | 8.31696214  | 0.003701557 | 6.132410033 |
| RMI1         | NM_024945    | 78.05891695 | 2.753406662 | 1.60E-07    | 28.3499412  |
| PEX16        | NM_004813    | 87.33650713 | 14.12795288 | 4.29E-05    | 6.181823218 |
| UBR1         | NM_174916    | 49.69157001 | 2.762686717 | 0.000357    | 17.98668293 |
| COX7A2       | NR_029466    | 62.95222924 | 9.84136686  | 0.000465865 | 6.396695716 |
| AKAP11       | NM_016248    | 90.8824255  | 1.095777133 | 3.20E-09    | 82.93878635 |
| ZNF564       | NM_144976    | 108.1748666 | 6.144123697 | 1.66E-08    | 17.6062319  |
| SMYD4        | NM_052928    | 175.9844663 | 5.230202421 | 1.40E-15    | 33.64773523 |
| ATG16L1      | NM_001190266 | 76.69875203 | 6.592354013 | 1.94E-05    | 11.63450141 |
| NRGN         | NM_006176    | 70.04406598 | 10.95209515 | 0.000301527 | 6.395494657 |
| LOC101928784 | NR_120339    | 68.29546324 | 0.736710769 | 5.40E-08    | 92.70322372 |
| TMX3         | NM_019022    | 58.5320095  | 1.784137044 | 2.65E-05    | 32.80690218 |
| ZNF808       | NM_001039886 | 37.69364998 | 2.253629369 | 0.002663337 | 16.7257538  |
| CNOT2        | NM_001199303 | 45.22263741 | 2.23448895  | 0.000598833 | 20.23846993 |
| FNIP2        | NM_020840    | 52.75162482 | 2.880057391 | 0.000191419 | 18.3161714  |
| TTC19        | NM_017775    | 103.754647  | 7.047160529 | 7.80E-08    | 14.72290102 |
| SRSF5        | NM_001039465 | 198.6201414 | 21.16893609 | 1.90E-12    | 9.382622752 |
| EP400NL      | NR_003290    | 88.64795919 | 4.639849505 | 2.88E-07    | 19.1057833  |
| DVL2         | NM_004422    | 111.2836343 | 18.74661525 | 6.29E-06    | 5.936198764 |
| CEP83        | NM_001042399 | 71.8413816  | 3.323153708 | 2.76E-06    | 21.61843475 |
| CENPBD1      | NM_145039    | 224.753022  | 20.41734343 | 8.90E-15    | 11.0079464  |
| IGLL1        | NM_020070    | 52.31447414 | 1.922016756 | 7.09E-05    | 27.21853177 |
| RAB7A        | NM_004637    | 129.8875276 | 5.561052051 | 1.17E-10    | 23.35664661 |
| KLHL25       | NM_022480    | 54.11178977 | 6.643110957 | 0.000458397 | 8.145549596 |
| WDR78        | NM_207014    | 44.78548671 | 2.581627375 | 0.000587929 | 17.3477734  |
| SAMD4A       | NM_015589    | 47.8942544  | 4.188789571 | 0.000379677 | 11.43391273 |
| ITPRIPL2     | NM_001034841 | 126.3416091 | 14.95578558 | 6.41E-08    | 8.447674545 |
| SLC25A25     | NM_001006641 | 168.8926296 | 13.20610284 | 7.02E-12    | 12.78898337 |
| ZNF292       | NM_015021    | 109.9721823 | 3.415479061 | 8.10E-10    | 32.19817201 |
| OPA1         | NM_130834    | 87.82237075 | 2.275060216 | 4.76E-08    | 38.60221813 |
| MKRN2        | NM_001271707 | 147.6171194 | 9.470179746 | 3.09E-11    | 15.58757314 |
| ACVR1B       | NM_020328    | 82.91628738 | 5.666566724 | 1.19E-06    | 14.63254408 |
| HBS1L        | NM_001145158 | 58.96916018 | 2.185012852 | 2.53E-05    | 26.98801525 |
| C1orf53      | NM_001024594 | 114.392402  | 5.859081504 | 9.07E-10    | 19.52394789 |
| ADK          | NM_001123    | 76.26160134 | 2.593999104 | 9.70E-07    | 29.39923966 |
| TXNRD2       | NM_006440    | 140.5252827 | 9.368166005 | 4.65E-10    | 15.0002981  |
| RFESD        | NM_001131065 | 74.07584791 | 3.352149023 | 7.19E-07    | 22.09801754 |
| NR2C2        | NM_001291694 | 83.35343807 | 4.418529722 | 1.52E-06    | 18.86451904 |
| JRK          | NM_001077527 | 218.0983361 | 17.27478537 | 5.10E-15    | 12.62524144 |
| STYXL1       | NM_016086    | 118.8126218 | 9.457084993 | 2.10E-08    | 12.56334503 |
| FADS2        | NM_001281502 | 64.31239418 | 12.46365234 | 0.000713949 | 5.159995836 |
| GPATCH2      | NM_018040    | 83.35343807 | 0.665039042 | 8.95E-09    | 125.3361574 |
| CCNDBP1      | NR_045999    | 49.20570646 | 3.750559042 | 0.00068574  | 13.11956589 |
| PNN          | NM_002687    | 104.1917976 | 18.31320464 | 2.65E-05    | 5.689435554 |
| PUS7         | NM_019042    | 144.5083517 | 4.76190227  | 1.94E-12    | 30.34676975 |
| KIAA1715     | NM_030650    | 115.7038541 | 1.300047301 | 3.57E-11    | 88.99972644 |
| SLC25A27     | NM_004277    | 50.5658714  | 3.931208189 | 0.000608212 | 12.86267961 |
| NOC3L        | NM_022451    | 51.44017277 | 2.706308994 | 0.000109949 | 19.00750169 |
| EFTUD2       | NM_001258353 | 81.60483533 | 5.264774535 | 1.19E-06    | 15.50015766 |
| DNAJC9-AS1   | NR_038373    | 94.86549455 | 9.972057697 | 2.52E-06    | 9.513131335 |

|              |              |             |             |             |             |
|--------------|--------------|-------------|-------------|-------------|-------------|
| ZNF121       | NM_001008727 | 106.8634146 | 4.066535183 | 1.40E-09    | 26.27873849 |
| DDX19A       | NM_018332    | 102.0060442 | 6.4450731   | 6.16E-08    | 15.82698017 |
| URB1         | NM_014825    | 90.4452748  | 5.985653436 | 2.66E-07    | 15.11034272 |
| TIMM23B      | NM_001290117 | 94.42834386 | 2.278225786 | 2.46E-08    | 41.44819378 |
| NSMCE2       | NM_173685    | 97.53711154 | 6.048224711 | 1.11E-07    | 16.12656874 |
| ARMC9        | NM_001291656 | 53.67463907 | 4.858375595 | 0.000543962 | 11.04785705 |
| NR6A1        | NM_001489    | 102.394482  | 5.391655652 | 3.41E-08    | 18.99128738 |
| CYTH3        | NM_004227    | 99.28571429 | 5.387691109 | 4.87E-08    | 18.42824919 |
| SUPT7L       | NM_001282730 | 137.4165149 | 7.17784645  | 4.05E-11    | 19.14453254 |
| RPS24        | NM_001142284 | 99.7715779  | 18.91191793 | 4.02E-05    | 5.27559279  |
| SUZ12        | NM_015355    | 132.9962952 | 6.502079418 | 2.05E-10    | 20.45442491 |
| FAXC         | NM_032511    | 69.60691528 | 2.373013436 | 3.51E-06    | 29.33271014 |
| DHX36        | NM_001114397 | 75.82445064 | 2.893390297 | 4.18E-07    | 26.20609143 |
| RBM12        | NM_006047    | 144.071201  | 14.44726717 | 1.76E-09    | 9.972211307 |
| HAUS1        | NM_138443    | 77.62176628 | 2.621836524 | 1.56E-07    | 29.60587571 |
| C11orf30     | NM_001300943 | 72.27853228 | 3.390328032 | 2.53E-06    | 21.31903804 |
| ZNF507       | NM_001136156 | 92.24259043 | 1.696942757 | 5.30E-09    | 54.35810375 |
| NOL8         | NM_017948    | 98.89727652 | 8.316148911 | 1.55E-07    | 11.89219645 |
| CENPE        | NM_001286734 | 95.3513581  | 3.551345518 | 1.70E-08    | 26.84936107 |
| MTFR2        | NM_001099286 | 53.67463907 | 2.606508263 | 3.70E-05    | 20.59254514 |
| IARS         | NM_013417    | 90.4452748  | 3.524918642 | 2.94E-08    | 25.6588262  |
| CDADC1       | NR_036439    | 80.68182108 | 2.303783666 | 1.58E-07    | 35.02143985 |
| DERL1        | NM_024295    | 77.62176628 | 3.676935868 | 2.11E-06    | 21.11044877 |
| YPEL2        | NM_001005404 | 52.31447414 | 8.083513591 | 0.003138436 | 6.471749388 |
| TMEM132A     | NM_017870    | 76.69875203 | 11.99714976 | 0.000163995 | 6.393081154 |
| WDYHV1       | NM_001283027 | 151.1630377 | 6.885453253 | 1.39E-12    | 21.95397052 |
| ABHD14A      | NM_015407    | 122.7956908 | 13.04747462 | 5.33E-08    | 9.411452748 |
| TRDMT1       | NM_004412    | 73.58998434 | 4.14213712  | 7.20E-06    | 17.76618741 |
| CREB1        | NM_134442    | 70.48121666 | 3.343722586 | 2.20E-06    | 21.07866752 |
| TRAPPC2L     | NM_016209    | 90.00812411 | 11.20596647 | 5.09E-06    | 8.032160758 |
| SESN2        | NM_031459    | 147.1799686 | 13.72706629 | 8.73E-10    | 10.72188081 |
| MISP         | NM_173481    | 79.8075197  | 12.29381739 | 9.80E-05    | 6.491679286 |
| GPR160       | NM_014373    | 55.42324183 | 3.200999132 | 7.99E-05    | 17.31435703 |
| LOC101927221 | NR_125415    | 85.58790438 | 4.642077291 | 1.16E-07    | 18.43741476 |
| URM1         | NM_001135947 | 105.5032497 | 13.31446848 | 9.43E-07    | 7.923955044 |
| RAB30-AS1    | NR_038903    | 125.4673077 | 16.50845616 | 1.12E-06    | 7.600184205 |
| ATXN2L       | NM_145714    | 165.3467113 | 21.3856476  | 1.32E-09    | 7.731667253 |
| FZD6         | NM_001164616 | 182.2020017 | 6.880096744 | 2.46E-15    | 26.4824767  |
| LOC644936    | NR_004845    | 34.58488231 | 2.188184377 | 0.004141995 | 15.8052871  |
| AGGF1        | NM_018046    | 65.18669554 | 3.290210313 | 4.98E-06    | 19.81231877 |
| RBL2         | NM_005611    | 43.91118534 | 1.877040362 | 0.000897754 | 23.39384183 |
| CAPZA1       | NM_006135    | 38.13080067 | 4.029541647 | 0.00358662  | 9.462813394 |
| ATP6V0A1     | NM_001130020 | 75.82445064 | 6.581777056 | 4.85E-06    | 11.52036145 |
| TCTEX1D2     | NM_152773    | 58.96916018 | 7.651309222 | 0.000523994 | 7.707067964 |
| TELO2        | NM_016111    | 76.69875203 | 18.51524581 | 0.001506933 | 4.142464691 |
| PRRT3-AS1    | NR_046734    | 54.98609113 | 8.746598906 | 0.002805055 | 6.286568267 |
| LOC374443    | NR_002814    | 55.42324183 | 3.024666398 | 0.0001152   | 18.32375361 |
| OAS3         | NM_006187    | 82.91628738 | 7.293167884 | 5.75E-06    | 11.36903588 |
| LEKR1        | NM_001004316 | 129.4503768 | 3.614197286 | 1.77E-11    | 35.8171861  |
| LYPD6        | NM_001195685 | 47.45710371 | 2.234317137 | 0.00034022  | 21.24009297 |
| SLC25A42     | NM_178526    | 51.87732345 | 9.689013484 | 0.003087992 | 5.354242054 |
| BAP1         | NM_004656    | 91.31957618 | 19.93340709 | 0.00024849  | 4.581232689 |
| PTPLA        | NM_014241    | 120.6099374 | 2.299883757 | 2.26E-12    | 52.44175365 |
| ATP6V0A2     | NM_012463    | 88.69667206 | 5.637767184 | 3.70E-07    | 15.73258866 |
| RPL12        | NM_000976    | 170.6899452 | 40.54088077 | 6.88E-07    | 4.210316647 |
| CYB561       | NM_001017916 | 103.754647  | 20.5001901  | 4.50E-05    | 5.061155359 |
| SLC35D1      | NM_015139    | 50.5658714  | 3.863108827 | 0.000168394 | 13.08942452 |
| DAZAP1       | NM_170711    | 105.9404003 | 19.07835853 | 1.35E-05    | 5.552909606 |
| MAP7D1       | NM_018067    | 104.6289483 | 16.05436585 | 3.98E-06    | 6.517164815 |
| SFXN4        | NM_213649    | 111.7207851 | 3.051807379 | 3.30E-10    | 36.60807226 |
| PRDM4        | NM_012406    | 137.8536657 | 5.607085171 | 2.79E-11    | 24.58562006 |
| FAM173B      | NR_047668    | 140.9624333 | 3.654775477 | 4.15E-13    | 38.5693825  |

|              |              |             |             |             |             |
|--------------|--------------|-------------|-------------|-------------|-------------|
| PEX7         | NM_000288    | 94.42834386 | 2.434739734 | 1.28E-08    | 38.78375275 |
| MYO1B        | NM_012223    | 76.26160134 | 3.177316391 | 8.42E-07    | 24.00189089 |
| PSMG1        | NM_001261824 | 83.35343807 | 4.876248152 | 5.53E-07    | 17.09376461 |
| MRPL11       | NM_016050    | 76.26160134 | 17.08916517 | 0.001303428 | 4.462570324 |
| GTF2IRD2B    | NM_001003795 | 144.5083517 | 6.225956529 | 2.27E-12    | 23.21062652 |
| HNRNPK       | NM_031262    | 108.1748666 | 9.784187049 | 5.24E-08    | 11.05609144 |
| PHAX         | NM_032177    | 97.53711154 | 3.891025093 | 1.94E-08    | 25.06720188 |
| LEMD2        | NM_181336    | 129.8875276 | 14.38761633 | 3.58E-08    | 9.027730835 |
| TMEM87B      | NM_032824    | 69.60691528 | 3.264348759 | 3.78E-06    | 21.32336966 |
| KLHL8        | NM_001292007 | 130.7618289 | 3.750753188 | 2.79E-11    | 34.86281885 |
| RPL27A       | NM_000990    | 157.8177238 | 33.39111418 | 7.28E-07    | 4.726338957 |
| INTS7        | NM_001199812 | 58.5320095  | 3.403798838 | 5.42E-05    | 17.19608364 |
| SUPT20H      | NM_001014286 | 104.6289483 | 3.571001447 | 7.62E-10    | 29.2996096  |
| SMG7         | NM_201569    | 77.57305339 | 3.333226805 | 6.51E-07    | 23.27265978 |
| WRAP73       | NM_017818    | 58.96916018 | 8.697903589 | 0.000485926 | 6.779698071 |
| RAB6A        | NM_002869    | 101.9573313 | 4.206320256 | 2.11E-08    | 24.23907954 |
| C5orf34      | NM_198566    | 36.8193486  | 2.50704637  | 0.002782389 | 14.68634527 |
| FAM126B      | NM_173822    | 54.11178977 | 3.901970199 | 0.000103123 | 13.86781216 |
| AIDA         | NM_022831    | 59.84346156 | 3.319564976 | 2.17E-05    | 18.02750119 |
| FAM72A       | NM_001123168 | 21.76137377 | 0.406231498 | 0.004336431 | 53.56889822 |
| WDR5B        | NM_019069    | 72.27853228 | 8.776464142 | 0.000112013 | 8.235495652 |
| UCHL5        | NM_001199263 | 121.0470881 | 4.529016732 | 2.61E-10    | 26.72701277 |
| TRIM65       | NM_173547    | 213.6781163 | 25.39291976 | 1.37E-12    | 8.414869905 |
| CBLB         | NM_170662    | 41.23956835 | 1.445322738 | 0.002069791 | 28.53312085 |
| CLTA         | NM_001184762 | 89.13382275 | 9.310524937 | 6.15E-06    | 9.573447615 |
| NUDT7        | NM_001243657 | 37.69364998 | 1.342283932 | 0.001601353 | 28.08172629 |
| NDE1         | NM_001143979 | 132.1219938 | 7.03754235  | 4.71E-10    | 18.77388259 |
| BCL3         | NM_005178    | 109.4863187 | 18.65904367 | 1.30E-05    | 5.867734738 |
| RASSF3       | NR_040718    | 86.89935644 | 4.751110818 | 8.16E-07    | 18.29032405 |
| POLR1E       | NM_022490    | 82.4791367  | 8.927973361 | 1.66E-05    | 9.238282123 |
| RABGEF1      | NM_014504    | 122.3585401 | 6.283230602 | 3.61E-10    | 19.4738261  |
| FTH1         | NM_002032    | 186.3312094 | 16.63618793 | 2.26E-12    | 11.20035492 |
| PRPSAP2      | NM_001243941 | 91.31957618 | 3.699027311 | 2.79E-08    | 24.68745659 |
| ANKRD26      | NM_014915    | 61.2036265  | 1.243784733 | 1.93E-05    | 49.20757174 |
| CA5BP1       | NR_026551    | 56.73469387 | 1.320962265 | 1.27E-05    | 42.94951899 |
| ANKH         | NM_054027    | 73.58998434 | 1.670811811 | 1.22E-06    | 44.04444823 |
| ATP5A1       | NM_004046    | 132.1219938 | 8.110031806 | 2.74E-10    | 16.29118072 |
| DPY30        | NM_032574    | 63.38937993 | 2.615944321 | 3.25E-06    | 24.2319301  |
| CDK19        | NM_015076    | 84.22773945 | 3.793726918 | 2.68E-07    | 22.20184565 |
| MTCH1        | NM_014341    | 125.4673077 | 17.98267022 | 2.69E-07    | 6.977123319 |
| SIRT5        | NM_012241    | 96.22565948 | 6.146974378 | 5.45E-08    | 15.65415009 |
| CTNNAL1      | NM_003798    | 131.1989796 | 3.740393094 | 3.49E-11    | 35.07625436 |
| FAM171B      | NM_177454    | 72.27853228 | 1.422128037 | 1.15E-06    | 50.8242088  |
| ZYX          | NM_003461    | 120.1240738 | 17.57629749 | 4.04E-07    | 6.834435629 |
| CCDC58       | NM_001017928 | 55.42324183 | 4.535502351 | 0.000342358 | 12.21986839 |
| USP13        | NM_003940    | 59.40631088 | 0.847013687 | 1.93E-06    | 70.13618762 |
| ZC3H13       | NM_015070    | 53.67463907 | 2.956320651 | 9.59E-05    | 18.15589221 |
| PNISR        | NM_032870    | 54.11178977 | 3.845048703 | 0.000324699 | 14.07310907 |
| ERCC4        | NM_005236    | 46.58280234 | 3.67043175  | 0.000490289 | 12.69136862 |
| OSBPL5       | NM_001144063 | 70.48121666 | 10.83052471 | 0.000264161 | 6.507645616 |
| CMAS         | NM_018686    | 51.44017277 | 2.214175851 | 6.62E-05    | 23.23219845 |
| IRAK1BP1     | NM_001010844 | 38.13080067 | 1.168279197 | 0.002102732 | 32.63843161 |
| CHAMP1       | NM_001164145 | 200.3687442 | 8.846327249 | 1.28E-16    | 22.64993579 |
| OGFOD3       | NR_033265    | 197.2599765 | 17.73652862 | 5.13E-13    | 11.12167893 |
| FGGY         | NM_018291    | 44.34833603 | 0.1988227   | 5.62E-05    | 223.0546919 |
| COA7         | NM_023077    | 83.79058876 | 5.000016953 | 1.29E-06    | 16.75806093 |
| PHF3         | NM_001290259 | 58.09485881 | 2.774852819 | 4.88E-05    | 20.93619468 |
| LOC100996255 | NR_102756    | 98.41141291 | 2.373534123 | 2.54E-09    | 41.46197519 |
| DOCK11       | NM_144658    | 38.13080067 | 1.381224293 | 0.00368917  | 27.60652333 |
| METTL17      | NM_022734    | 55.42324183 | 5.984407098 | 0.000655302 | 9.26127533  |
| EMC9         | NM_016049    | 157.8177238 | 28.07400916 | 2.55E-07    | 5.621488648 |
| ADAR         | NM_015840    | 50.12872071 | 7.397374436 | 0.002680745 | 6.776555809 |

|              |              |             |             |             |             |
|--------------|--------------|-------------|-------------|-------------|-------------|
| SPAG9        | NM_001130527 | 265.9925904 | 6.025701716 | 2.01E-23    | 44.14300657 |
| FAM212B      | NM_019099    | 63.43809281 | 13.12352244 | 0.002643945 | 4.833922682 |
| KIAA1143     | NM_020696    | 89.57097344 | 5.119063284 | 3.89E-07    | 17.49753196 |
| CBFB         | NM_001755    | 123.6699922 | 2.640152367 | 1.60E-11    | 46.84199054 |
| TMEM161A     | NM_017814    | 61.2036265  | 11.13738771 | 0.001627624 | 5.495330511 |
| RAD21-AS1    | NR_033886    | 105.066099  | 6.541972591 | 1.75E-08    | 16.06030865 |
| TBC1D22A     | NM_001284303 | 77.13590271 | 4.309376317 | 6.19E-06    | 17.89955136 |
| MRPL24       | NM_145729    | 83.79058876 | 11.32603726 | 3.35E-05    | 7.398049896 |
| RAB31        | NM_006868    | 88.64795919 | 4.552395854 | 5.38E-07    | 19.47281432 |
| PRR21        | NM_001080835 | 41.67671904 | 1.076025258 | 0.001573421 | 38.73210106 |
| PITPNC1      | NM_181671    | 67.42116185 | 5.504703045 | 3.43E-05    | 12.24791988 |
| ATP11A       | NM_032189    | 58.96916018 | 5.341476661 | 0.000181654 | 11.03986106 |
| NUB1         | NM_001243351 | 86.89935644 | 7.960420357 | 3.43E-06    | 10.9164281  |
| LINC01184    | NR_015360    | 52.80033771 | 3.058571795 | 0.000162493 | 17.26306958 |
| DCTN4        | NM_016221    | 47.8942544  | 4.902505521 | 0.001469739 | 9.769342266 |
| SLC43A1      | NM_003627    | 42.11386972 | 6.526807874 | 0.004356683 | 6.452445136 |
| COX15        | NM_004376    | 108.1748666 | 7.433806442 | 1.89E-08    | 14.55174647 |
| SCAF1        | NM_021228    | 82.4791367  | 17.14567188 | 0.000219551 | 4.810493125 |
| CDK9         | NM_001261    | 112.1579357 | 25.25881085 | 6.40E-05    | 4.440349008 |
| SLC4A7       | NM_001258379 | 140.9624333 | 1.909248932 | 4.01E-13    | 73.83135375 |
| DHPS         | NM_001930    | 104.6289483 | 13.48212236 | 2.33E-06    | 7.760569552 |
| ASTE1        | NM_014065    | 90.8824255  | 3.091634312 | 1.07E-08    | 29.39624041 |
| CCNYL1       | NM_152523    | 52.75162482 | 5.837580624 | 0.000835238 | 9.036556103 |
| RCBTB2       | NM_001286831 | 96.22565948 | 2.655340034 | 3.09E-09    | 36.23854506 |
| HNRNPLL      | NM_001142650 | 76.69875203 | 4.029570518 | 3.00E-06    | 19.03397687 |
| MAP2K5       | NM_001206804 | 51.00302207 | 3.041288396 | 0.000206116 | 16.77020244 |
| SLC19A2      | NM_006996    | 55.90910538 | 3.989527572 | 0.000163787 | 14.01396641 |
| PLEKHH2      | NM_172069    | 56.78340675 | 2.737569194 | 5.54E-05    | 20.7422727  |
| AP5S1        | NM_001204447 | 74.56171144 | 11.10400473 | 0.000303072 | 6.714848675 |
| KIAA0247     | NM_014734    | 92.19387756 | 5.01140385  | 2.71E-07    | 18.3968166  |
| BACH1        | NM_001186    | 123.6699922 | 1.285931504 | 9.54E-13    | 96.17152377 |
| ZNF490       | NM_020714    | 47.8942544  | 4.765356117 | 0.001339203 | 10.05050897 |
| OGDHL        | NM_001143997 | 46.14565165 | 5.997944714 | 0.002388303 | 7.693577359 |
| C1orf21      | NM_030806    | 73.15283366 | 0.594486622 | 7.42E-08    | 123.0521108 |
| CEP85        | NM_022778    | 132.9962952 | 8.243362008 | 1.83E-10    | 16.13374435 |
| TM2D1        | NM_032027    | 40.80241766 | 1.399457023 | 0.00137622  | 29.15589189 |
| CDCA5        | NM_080668    | 111.2836343 | 16.29577961 | 1.13E-06    | 6.828984988 |
| POC1B        | NM_172240    | 61.64077717 | 2.809578247 | 1.53E-05    | 21.93951253 |
| PDGFC        | NM_016205    | 27.93019625 | 1.250512267 | 0.004054886 | 22.33500381 |
| SPATS2       | NM_001293286 | 154.2718054 | 6.161528306 | 9.24E-13    | 25.0379123  |
| DNMT1        | NM_001379    | 115.2667034 | 12.39305454 | 3.10E-07    | 9.30091149  |
| RAD51C       | NM_002876    | 147.1799686 | 8.090344995 | 5.76E-12    | 18.19205099 |
| POLR2H       | NM_001278715 | 89.57097344 | 12.17792918 | 2.11E-05    | 7.355189219 |
| SNRNP35      | NM_022717    | 100.2087285 | 8.006920491 | 1.16E-07    | 12.5152646  |
| ATP5J2-PTCD1 | NM_001198879 | 112.1579357 | 15.84326687 | 1.82E-06    | 7.079217729 |
| AMOTL1       | NM_001301007 | 50.5658714  | 3.412531649 | 0.000189287 | 14.81770035 |
| ROCK2        | NM_004850    | 115.7038541 | 3.399035597 | 3.07E-10    | 34.04020076 |
| C11orf73     | NR_024597    | 54.98609113 | 2.279009096 | 6.45E-05    | 24.12719248 |
| FAM169A      | NR_046462    | 136.1050629 | 3.783512094 | 1.33E-11    | 35.97320677 |
| ITPK1        | NM_001142593 | 113.0322371 | 9.523217804 | 2.06E-08    | 11.86912233 |
| CYBA         | NM_000101    | 175.5473156 | 41.45118112 | 7.07E-07    | 4.235037722 |
| SLC16A6      | NM_001174166 | 61.64077717 | 8.09647874  | 0.000292833 | 7.613282163 |
| MYO9B        | NM_001130065 | 137.8536657 | 8.749053323 | 2.13E-10    | 15.75640936 |
| TMEM110      | NM_198563    | 87.33650713 | 5.227762578 | 3.98E-07    | 16.70628798 |
| ZNF594       | NM_032530    | 148.4914208 | 8.53654536  | 3.85E-12    | 17.39479081 |
| ZNF497       | NM_198458    | 89.57097344 | 13.30655239 | 4.06E-05    | 6.731343388 |
| LOC400794    | NR_026744    | 42.11386972 | 0.189572274 | 3.17E-05    | 222.1520522 |
| BACE2        | NM_138991    | 54.98609113 | 0.831150281 | 6.91E-06    | 66.15661741 |
| SIVA1        | NM_006427    | 136.1050629 | 18.16977908 | 6.39E-08    | 7.490738456 |
| FUT8-AS1     | NR_024334    | 72.71568297 | 12.98749086 | 0.001145791 | 5.598901571 |
| FRMD8        | NM_001300833 | 98.41141291 | 15.62077378 | 1.96E-05    | 6.300034448 |
| TOP3A        | NM_004618    | 83.79058876 | 8.31590033  | 6.60E-06    | 10.07594914 |



|             |              |             |             |             |             |
|-------------|--------------|-------------|-------------|-------------|-------------|
| TXN2        | NM_012473    | 200.3687442 | 12.48855905 | 5.53E-15    | 16.04418439 |
| B4GALT1-AS1 | NR_108110    | 82.91628738 | 4.035726038 | 1.84E-07    | 20.5455689  |
| RPL4        | NM_000968    | 123.2815543 | 24.33353912 | 9.57E-06    | 5.0663224   |
| MPZL3       | NM_001286152 | 90.8824255  | 3.434024658 | 5.84E-08    | 26.4652804  |
| FAF2        | NM_014613    | 90.00812411 | 3.228158948 | 2.19E-08    | 27.88218473 |
| GAREM       | NM_001242409 | 47.8942544  | 1.359802499 | 0.000332585 | 35.22147844 |
| LARP4B      | NM_015155    | 81.11897176 | 5.853607846 | 3.08E-06    | 13.85794435 |
| NVL         | NM_001243147 | 111.7207851 | 2.442585567 | 3.09E-10    | 45.73873955 |
| ARCN1       | NM_001655    | 126.3416091 | 3.77452429  | 2.87E-11    | 33.47219396 |
| DSE         | NM_013352    | 82.4791367  | 2.072932875 | 1.11E-07    | 39.78861915 |
| ABCD3       | NM_001122674 | 90.00812411 | 3.090862384 | 2.07E-08    | 29.12071549 |
| AK6         | NM_016283    | 175.5473156 | 7.570908807 | 2.31E-14    | 23.18708627 |
| CEPT1       | NM_001007794 | 58.96916018 | 2.91966552  | 2.05E-05    | 20.19723142 |
| RCBTB1      | NM_018191    | 66.49814761 | 3.496077055 | 6.80E-06    | 19.02079004 |
| CISD1       | NM_018464    | 44.34833603 | 0.713241077 | 7.50E-05    | 62.17860617 |
| TRIM13      | NM_001007278 | 84.22773945 | 7.212618863 | 4.10E-06    | 11.67783035 |
| KCTD18      | NM_152387    | 128.5760755 | 4.581198494 | 8.69E-12    | 28.06603462 |
| SFTA3       | NM_001101341 | 29.72751187 | 0.372257666 | 0.001576074 | 79.85735311 |
| C20orf24    | NM_018840    | 110.4093329 | 11.42094551 | 1.77E-07    | 9.667267285 |
| GOT1        | NM_002079    | 44.78548671 | 5.641281234 | 0.002464012 | 7.938885664 |
| TIRAP       | NM_001039661 | 165.3467113 | 8.715531409 | 3.54E-13    | 18.97150082 |
| ZDHHC17     | NM_015336    | 113.0322371 | 2.155631384 | 1.18E-10    | 52.43579116 |
| CLPTM1L     | NM_030782    | 66.06099693 | 8.328673889 | 0.00017429  | 7.931754539 |
| STARD3      | NM_006804    | 123.7187051 | 17.25713653 | 5.86E-07    | 7.16913289  |
| FAM86HP     | NR_024252    | 62.07792787 | 11.46434957 | 0.000857068 | 5.414866976 |
| H2AFY       | NM_138609    | 173.75      | 8.030096936 | 7.04E-14    | 21.63734777 |
| ETFA        | NM_001127716 | 117.9383204 | 4.179484328 | 1.11E-09    | 28.21839039 |
| PSAT1       | NM_058179    | 73.15283366 | 1.450864259 | 2.02E-07    | 50.42017764 |
| CTDSPL2     | NM_016396    | 44.34833603 | 4.422022638 | 0.002770474 | 10.02897083 |
| SEMA4B      | NM_198925    | 95.30264523 | 13.10047642 | 1.01E-05    | 7.274746518 |
| KDF1        | NM_152365    | 124.5930065 | 15.13729349 | 1.21E-07    | 8.230864163 |
| FAM86A      | NM_201598    | 63.38937993 | 12.16694888 | 0.002388303 | 5.209965175 |
| SF3A3       | NM_006802    | 75.38729997 | 5.272553277 | 5.95E-06    | 14.2980632  |
| TXNDC9      | NM_005783    | 135.2307615 | 2.331190698 | 8.77E-14    | 58.00930899 |
| HHEX        | NM_002729    | 93.11689181 | 15.31566788 | 2.70E-05    | 6.079845329 |
| RFC3        | NM_181558    | 61.64077717 | 2.812423077 | 1.66E-05    | 21.91732022 |
| DDX46       | NM_014829    | 56.78340675 | 6.197585925 | 0.000292759 | 9.162181443 |
| CLTC        | NM_004859    | 104.6289483 | 7.204309731 | 8.22E-08    | 14.52310522 |
| ZNF843      | NM_001136509 | 48.33140508 | 1.932057833 | 3.21E-05    | 25.0155064  |
| FBXO17      | NM_024907    | 55.42324183 | 5.314872767 | 0.000425788 | 10.4279527  |
| NACA        | NR_045277    | 100.6458792 | 13.38555836 | 6.51E-06    | 7.518989983 |
| TUBA8       | NM_018943    | 37.2564993  | 3.349468393 | 0.002754166 | 11.12310819 |
| CECR5       | NM_033070    | 57.22055744 | 6.879214936 | 0.000819873 | 8.317890627 |
| CAPN5       | NM_004055    | 82.4791367  | 10.22329593 | 3.02E-05    | 8.067763791 |
| RNFT1       | NM_016125    | 98.89727652 | 10.17480229 | 3.52E-07    | 9.719822925 |
| FKRP        | NM_024301    | 123.2328415 | 15.54271943 | 7.96E-08    | 7.928653801 |
| ENO1        | NM_001428    | 124.1558557 | 22.02243643 | 1.58E-06    | 5.637698451 |
| GSPT1       | NM_002094    | 71.8413816  | 4.266047521 | 1.20E-05    | 16.84026754 |
| ARHGEF3     | NM_001128615 | 54.11178977 | 3.818341722 | 0.000117183 | 14.17154192 |
| MPST        | NM_021126    | 70.04406598 | 7.477598977 | 2.46E-05    | 9.367186739 |
| FAM133B     | NM_001288584 | 72.27853228 | 2.871451796 | 9.48E-07    | 25.17142457 |
| PSMA6       | NM_001282232 | 71.8413816  | 4.753256516 | 8.46E-06    | 15.1141394  |
| CPT1A       | NM_001031847 | 88.64795919 | 6.967446195 | 2.55E-06    | 12.7231638  |
| PPP2R3C     | NM_017917    | 64.31239418 | 3.107982115 | 4.98E-06    | 20.69265259 |
| PTCD2       | NM_001284404 | 79.37036901 | 4.130549117 | 1.61E-06    | 19.21545218 |
| ACTR3       | NM_005721    | 52.31447414 | 2.336439171 | 0.000156603 | 22.39068528 |
| CHMP2B      | NM_001244644 | 69.1697646  | 1.793389264 | 9.89E-07    | 38.5692978  |
| UFD1L       | NM_005659    | 110.8464837 | 7.162749093 | 1.24E-08    | 15.47541066 |
| NMT1        | NM_021079    | 109.049168  | 11.59145354 | 2.09E-07    | 9.407721612 |
| FAM83D      | NM_030919    | 71.40423091 | 8.461998297 | 5.57E-05    | 8.438223266 |
| TIGD1       | NM_145702    | 158.2548744 | 18.94897562 | 2.48E-09    | 8.351632171 |
| NCKAP1      | NM_205842    | 45.22263741 | 3.966249223 | 0.000650854 | 11.4018648  |

|              |              |             |             |             |             |
|--------------|--------------|-------------|-------------|-------------|-------------|
| FAM35A       | NM_019054    | 83.79058876 | 1.80255976  | 1.35E-07    | 46.48422238 |
| SLC36A1      | NM_078483    | 57.65770813 | 4.199763346 | 0.000237682 | 13.72879931 |
| DENND4B      | NM_014856    | 137.4165149 | 16.80563926 | 2.70E-08    | 8.176809748 |
| SMIM7        | NM_001300925 | 87.33650713 | 18.32694513 | 0.000138379 | 4.765469995 |
| ZBTB1        | NM_014950    | 129.4503768 | 4.914626155 | 2.31E-11    | 26.33982173 |
| CHST11       | NM_018413    | 49.20570646 | 5.445523036 | 0.001730687 | 9.035992711 |
| POLR2J2      | NM_032959    | 66.93529829 | 5.884527504 | 4.08E-05    | 11.37479572 |
| CAMK1D       | NM_020397    | 62.51507855 | 2.963124857 | 1.94E-05    | 21.09768625 |
| BAIAP2       | NM_006340    | 232.7191601 | 28.72915295 | 1.94E-13    | 8.10045324  |
| MCM2         | NR_073375    | 99.33442714 | 9.233430501 | 6.60E-07    | 10.75812799 |
| ST3GAL1      | NM_003033    | 59.40631088 | 4.725338797 | 0.000170202 | 12.57186277 |
| USP16        | NM_001001992 | 97.97426223 | 4.573283114 | 2.95E-08    | 21.42317888 |
| RABGAP1      | NM_012197    | 101.5201806 | 4.014581222 | 3.72E-09    | 25.28786317 |
| TMBIM1       | NM_022152    | 81.60483533 | 17.62507469 | 0.000586623 | 4.630041957 |
| KIAA0196     | NM_014846    | 100.6458792 | 5.440014022 | 3.90E-08    | 18.50103305 |
| PLXNB1       | NM_002673    | 98.41141291 | 13.15299129 | 5.63E-06    | 7.482055659 |
| LONRF1       | NM_152271    | 52.75162482 | 1.864819808 | 9.19E-05    | 28.28778663 |
| CS           | NM_004077    | 96.66281017 | 9.849045355 | 1.39E-06    | 9.814434465 |
| ZBTB43       | NM_014007    | 55.42324183 | 4.714579457 | 0.000403288 | 11.75571275 |
| TBC1D9       | NM_015130    | 63.38937993 | 2.438923739 | 1.57E-05    | 25.99071833 |
| WBP11        | NM_016312    | 82.91628738 | 2.491779207 | 1.65E-08    | 33.27593678 |
| DARS         | NM_001293312 | 119.2497724 | 1.989627586 | 2.31E-11    | 59.93572529 |
| VPS54        | NM_001005739 | 59.40631088 | 1.552866838 | 2.48E-05    | 38.2558951  |
| RPL34        | NM_033625    | 64.74954487 | 8.635304157 | 0.000342369 | 7.498235579 |
| PITRM1       | NM_001242307 | 123.6699922 | 4.580190764 | 1.07E-10    | 27.00105707 |
| NDNL2        | NM_138704    | 126.3416091 | 18.85409219 | 1.94E-06    | 6.701017894 |
| FBXO38       | NM_030793    | 93.11689181 | 2.002125057 | 6.13E-09    | 46.50902874 |
| BLVRA        | NM_001253823 | 55.86039251 | 3.616146014 | 4.50E-05    | 15.44749363 |
| GANAB        | NM_198335    | 65.18669554 | 12.34625583 | 0.001687577 | 5.27987565  |
| CHRNA1       | NM_000079    | 40.36526697 | 1.683046472 | 0.000817899 | 23.9834536  |
| PIGY         | NM_001042616 | 110.4093329 | 9.494475092 | 8.85E-08    | 11.628798   |
| RNF6         | NM_183044    | 73.15283366 | 2.375376786 | 2.55E-07    | 30.79630739 |
| POLR3GL      | NM_032305    | 54.11178977 | 5.644963232 | 0.000287103 | 9.585853361 |
| DDX11        | NM_152438    | 84.27645233 | 9.166262036 | 2.35E-05    | 9.194200645 |
| C19orf47     | NM_001256441 | 108.6120173 | 8.875478304 | 1.23E-07    | 12.23731427 |
| PET117       | NM_001164811 | 120.1727867 | 8.939750156 | 6.12E-09    | 13.44252184 |
| RMDN3        | NM_018145    | 75.82445064 | 9.945550999 | 5.95E-05    | 7.623956747 |
| ARMS2        | NM_001099667 | 33.27343024 | 1.20276093  | 0.001670559 | 27.66420941 |
| FRAT2        | NM_012083    | 97.97426223 | 7.616621306 | 8.42E-07    | 12.86321826 |
| NUDT4P2      | NR_104005    | 96.22565948 | 5.090537174 | 2.58E-08    | 18.90284978 |
| RBAK         | NM_021163    | 83.35343807 | 7.527955071 | 4.56E-06    | 11.07252066 |
| PSMC3        | NM_002804    | 86.46220574 | 17.98843041 | 0.000228711 | 4.806545307 |
| POGLUT1      | NR_024265    | 80.68182108 | 1.930526159 | 4.87E-08    | 41.79265881 |
| PUS10        | NM_144709    | 39.49096561 | 3.537022329 | 0.002045157 | 11.16503147 |
| SEMA4F       | NR_073399    | 42.16258261 | 6.208912238 | 0.00427938  | 6.79065527  |
| NTAN1        | NM_001270766 | 83.79058876 | 6.141915343 | 3.00E-06    | 13.64242001 |
| CSGALNACT2   | NM_018590    | 97.97426223 | 1.015866649 | 4.54E-10    | 96.44401887 |
| LINC01481    | NR_120460    | 73.15283366 | 4.944749204 | 3.92E-06    | 14.79404326 |
| MPZL1        | NM_024569    | 76.69875203 | 3.292942106 | 5.95E-07    | 23.29186167 |
| C1orf123     | NM_017887    | 224.753022  | 12.80345287 | 4.09E-18    | 17.55409453 |
| AHNAK        | NM_001620    | 57.65770813 | 11.94701974 | 0.003040727 | 4.82611642  |
| LOC100506747 | NR_036557    | 63.43809281 | 4.387684951 | 4.69E-05    | 14.4582151  |
| MAP4         | NM_001134364 | 78.93321834 | 4.285470009 | 3.26E-06    | 18.41880078 |
| VBP1         | NM_003372    | 54.54894044 | 1.354397903 | 2.13E-05    | 40.2754171  |
| C22orf29     | NM_024627    | 129.4503768 | 21.09666486 | 7.45E-07    | 6.136058834 |
| UBIAD1       | NM_013319    | 130.3246782 | 8.875048274 | 3.93E-10    | 14.68439091 |
| C14orf119    | NM_017924    | 76.69875203 | 6.296486893 | 5.89E-06    | 12.18119776 |
| AP2A2        | NM_012305    | 97.53711154 | 8.341485494 | 4.94E-07    | 11.69301458 |
| PSMD5-AS1    | NR_024408    | 86.89935644 | 6.470040581 | 8.86E-07    | 13.43103731 |
| BRK1         | NM_018462    | 75.38729997 | 3.368213592 | 9.47E-07    | 22.38198318 |
| IFNAR2       | NM_000874    | 87.33650713 | 6.277926594 | 3.00E-07    | 13.9116802  |
| AMFR         | NM_001144    | 98.8485636  | 3.826925138 | 2.93E-08    | 25.8297615  |

|                |              |             |             |             |             |
|----------------|--------------|-------------|-------------|-------------|-------------|
| AAR2           | NM_001271874 | 90.8824255  | 6.800805927 | 5.91E-07    | 13.36347875 |
| RNF169         | NM_001098638 | 82.91628738 | 5.174100972 | 1.55E-06    | 16.02525498 |
| CHD6           | NM_032221    | 32.83627956 | 0.484783356 | 0.001858219 | 67.73392514 |
| LOC101928414   | NR_120335    | 47.8942544  | 2.355492935 | 0.000186878 | 20.33300703 |
| COP5           | NM_006837    | 46.14565165 | 3.732822779 | 0.001776749 | 12.362133   |
| OXR1           | NM_181354    | 107.737716  | 2.21431797  | 4.78E-10    | 48.65503395 |
| CCDC94         | NM_018074    | 75.38729997 | 10.94787402 | 0.000115153 | 6.886021871 |
| TSTD3          | NM_001195131 | 154.7089561 | 6.622272565 | 4.00E-13    | 23.36191309 |
| C20orf27       | NM_001258429 | 68.29546324 | 10.58472733 | 0.000280961 | 6.452264771 |
| LYRM7          | NR_121658    | 62.51507855 | 2.318234513 | 7.20E-06    | 26.9666758  |
| DTWD2          | NM_173666    | 114.392402  | 0.814548039 | 3.70E-12    | 140.4366551 |
| HEXIM2         | NM_144608    | 129.8875276 | 18.01242798 | 2.16E-07    | 7.210994969 |
| HNRNPH2        | NM_019597    | 41.23956835 | 1.018844743 | 0.000121397 | 40.47679358 |
| NAA20          | NM_181528    | 65.62384623 | 5.591438582 | 2.44E-05    | 11.736487   |
| TMEM33         | NM_018126    | 108.1748666 | 2.942585643 | 6.69E-10    | 36.76184138 |
| LOC101929057   | NR_111915    | 105.9404003 | 3.800104028 | 6.60E-09    | 27.87828953 |
| PFN4           | NM_199346    | 91.31957618 | 7.261291726 | 6.50E-07    | 12.57621641 |
| MYO18A         | NM_203318    | 80.68182108 | 13.82144132 | 0.000181185 | 5.837439033 |
| PDCD2L         | NM_032346    | 63.38937993 | 4.562118264 | 4.99E-05    | 13.89472527 |
| FAM20B         | NM_014864    | 102.8316327 | 3.860484257 | 1.27E-08    | 26.63697759 |
| RPS7           | NM_001011    | 86.02505507 | 18.01043871 | 0.000431672 | 4.776399758 |
| CASD1          | NM_022900    | 87.33650713 | 0.997793887 | 4.56E-09    | 87.52960734 |
| XRCC6          | NM_001288978 | 62.07792787 | 9.820996163 | 0.001129039 | 6.320940039 |
| ZCCHC6         | NM_001185074 | 101.0830299 | 3.012206895 | 3.16E-09    | 33.5577978  |
| GLB1           | NM_000404    | 83.79058876 | 4.324305306 | 1.50E-06    | 19.37665887 |
| LOC100507217   | NR_037601    | 205.6632653 | 2.553904426 | 1.18E-23    | 80.5289592  |
| LOXL1          | NM_005576    | 100.6458792 | 11.35147867 | 8.05E-07    | 8.866323248 |
| COPZ1          | NM_016057    | 53.23748838 | 5.604539709 | 0.000396571 | 9.498993878 |
| CHSY1          | NM_014918    | 81.55612244 | 3.641744562 | 1.85E-07    | 22.39479487 |
| PAM            | NM_001177306 | 36.38219793 | 2.766994375 | 0.003866073 | 13.14863458 |
| TRAPPC2        | NM_001011658 | 73.58998434 | 2.818004142 | 3.19E-07    | 26.1142215  |
| NDRG3          | NM_022477    | 55.86039251 | 3.227427685 | 5.34E-05    | 17.30802297 |
| SLC26A2        | NM_000112    | 70.48121666 | 3.830008564 | 7.41E-06    | 18.40236529 |
| EXOC8          | NM_175876    | 94.86549455 | 14.05883229 | 1.96E-05    | 6.747750637 |
| CIAPIN1        | NM_020313    | 131.2476924 | 7.170547145 | 7.50E-11    | 18.30372073 |
| FBXO7          | NM_001033024 | 45.70850097 | 0.739388926 | 1.06E-05    | 61.81929341 |
| MAPK9          | NM_139068    | 127.2159105 | 7.531799271 | 6.90E-10    | 16.89050729 |
| PNO1           | NM_020143    | 51.87732345 | 0.409112648 | 3.08E-07    | 126.8044969 |
| SURF6          | NM_006753    | 80.68182108 | 13.92036778 | 0.000144255 | 5.795954703 |
| MFSD2A         | NM_001287808 | 53.67463907 | 11.76154078 | 0.004315368 | 4.563572075 |
| TBC1D19        | NM_018317    | 97.97426223 | 2.59760816  | 1.08E-08    | 37.71710596 |
| ATP6V0C        | NM_001694    | 155.5832575 | 25.5282274  | 3.50E-08    | 6.094557803 |
| NLRX1          | NM_024618    | 160.0521901 | 16.76764027 | 2.54E-10    | 9.545301991 |
| PTBP1          | NM_002819    | 186.6222214 | 31.14781711 | 1.65E-09    | 5.991502413 |
| SLC25A14       | NM_001282196 | 109.4863187 | 0.432064643 | 1.70E-13    | 253.4026345 |
| EPN1           | NM_001130072 | 91.31957618 | 13.33955158 | 1.50E-05    | 6.845775561 |
| FADS3          | NM_021727    | 65.62384623 | 14.75146378 | 0.004033329 | 4.44863284  |
| ERAL1          | NM_005702    | 124.1071429 | 6.718573336 | 3.77E-10    | 18.47224651 |
| ALMS1          | NM_015120    | 43.91118534 | 2.41692034  | 0.001204006 | 18.16823857 |
| PIGC           | NM_002642    | 68.73261391 | 7.811942245 | 7.29E-05    | 8.798402723 |
| C16orf72       | NM_014117    | 175.1101649 | 8.889424692 | 1.26E-13    | 19.69870615 |
| HMBX1          | NM_024567    | 56.29754319 | 3.177021144 | 5.90E-05    | 17.72022931 |
| KDM3B          | NM_016604    | 77.13590271 | 5.556796847 | 5.01E-06    | 13.88136094 |
| HELZ           | NM_014877    | 154.7089561 | 3.419577869 | 7.00E-14    | 45.24212112 |
| GAN            | NM_022041    | 152.086052  | 5.496905328 | 6.85E-13    | 27.6675771  |
| NUP62          | NM_001193357 | 104.6289483 | 17.56004978 | 1.19E-05    | 5.958351462 |
| GRB10          | NM_001001555 | 46.09693877 | 3.503241314 | 0.000674823 | 13.1583681  |
| CTR9           | NM_014633    | 120.1727867 | 5.383492722 | 1.91E-10    | 22.32245735 |
| SLTM           | NM_024755    | 116.1410048 | 4.220252164 | 6.56E-10    | 27.51992067 |
| CCDC132        | NM_001257998 | 30.60181325 | 1.243340056 | 0.00199865  | 24.61258536 |
| GAS2L1         | NM_152236    | 105.5032497 | 20.58508939 | 3.14E-05    | 5.125226694 |
| RPL36A-HNRNPH2 | NM_001199974 | 59.40631088 | 7.529358183 | 0.000493631 | 7.889956811 |

|                 |              |             |             |             |             |
|-----------------|--------------|-------------|-------------|-------------|-------------|
| RNF2            | NM_007212    | 77.13590271 | 2.650508068 | 4.47E-07    | 29.10230821 |
| UBXN7           | NM_015562    | 62.07792787 | 5.894959389 | 9.29E-05    | 10.53067948 |
| TAOK2           | NM_001252043 | 93.55404248 | 16.95330782 | 7.17E-05    | 5.518335625 |
| MIR181A1HG      | NR_040073    | 30.60181325 | 1.23135339  | 0.001997492 | 24.85217771 |
| TROVE2          | NM_004600    | 124.5930065 | 4.10491073  | 2.34E-11    | 30.35218417 |
| CRELD2          | NM_001284318 | 79.37036901 | 13.60087789 | 0.000227661 | 5.835679848 |
| SCAMP2          | NM_005697    | 151.1630377 | 9.686649453 | 1.92E-11    | 15.60529659 |
| SLMO1           | NM_001142405 | 90.8824255  | 7.246403207 | 7.41E-07    | 12.54172903 |
| HNRNPR          | NM_001297622 | 87.33650713 | 6.733352591 | 1.82E-06    | 12.97073129 |
| EARS2           | NR_003501    | 86.46220574 | 3.313281159 | 4.62E-08    | 26.09564405 |
| LOC646903       | NR_036538    | 133.4334458 | 11.11251846 | 2.39E-09    | 12.00748924 |
| CSNK2A1         | NM_177560    | 126.7787599 | 4.669441339 | 1.30E-10    | 27.15073404 |
| LOC100507530    | NR_125386    | 82.4791367  | 4.759293937 | 1.51E-06    | 17.33012035 |
| RPRD1B          | NM_021215    | 98.89727652 | 3.961678209 | 2.81E-08    | 24.96348045 |
| DMAP1           | NM_001034024 | 104.1917976 | 19.13169647 | 2.48E-05    | 5.446030244 |
| ZNF235          | NM_004234    | 44.34833603 | 1.725411128 | 0.000211953 | 25.70305437 |
| CDC20           | NM_001255    | 140.5252827 | 29.34581844 | 2.05E-06    | 4.788596473 |
| TMEM199         | NM_152464    | 86.46220574 | 6.9505087   | 2.55E-06    | 12.43969463 |
| SMC5-AS1        | NR_039990    | 40.80241766 | 2.285781228 | 0.001646214 | 17.85053493 |
| UBP1            | NM_001128161 | 159.1291758 | 5.080520561 | 6.91E-14    | 31.32143132 |
| TSPAN33         | NM_178562    | 51.87732345 | 8.736619515 | 0.00274352  | 5.937917219 |
| PSKH1           | NM_006742    | 129.4503768 | 10.61898088 | 3.17E-09    | 12.19047084 |
| SLC29A3         | NR_033414    | 79.37036901 | 5.84108196  | 2.19E-06    | 13.58829915 |
| CCT4            | NM_006430    | 157.3805731 | 10.09616979 | 3.33E-12    | 15.58814644 |
| PPIL2           | NM_014337    | 104.6289483 | 12.27685253 | 1.18E-06    | 8.522457038 |
| SEC24B-AS1      | NR_039978    | 78.93321834 | 2.253160902 | 1.70E-08    | 35.03221553 |
| RP2             | NM_006915    | 37.69364998 | 2.728455729 | 0.003261163 | 13.81501249 |
| NLE1            | NM_001014445 | 84.22773945 | 5.313591153 | 1.18E-06    | 15.85137754 |
| ZMYM5           | NM_001142684 | 94.86549455 | 5.366299127 | 9.07E-08    | 17.67801092 |
| CMTM8           | NM_178868    | 97.97426223 | 5.103258915 | 9.21E-08    | 19.19837184 |
| WEE1            | NM_001143976 | 49.20570646 | 2.477909041 | 0.00011752  | 19.85775331 |
| SLC7A6          | NM_003983    | 78.93321834 | 5.773353345 | 1.97E-06    | 13.67198812 |
| CNNM4           | NM_020184    | 180.4046861 | 9.682674968 | 1.26E-13    | 18.63169906 |
| SSRP1           | NM_003146    | 81.11897176 | 18.51470013 | 0.000754248 | 4.381327875 |
| SPECC1L-ADORA2A | NR_103546    | 141.399584  | 6.685673429 | 1.77E-11    | 21.14963967 |
| EML2            | NM_012155    | 62.95222924 | 11.93627865 | 0.001096733 | 5.274024768 |
| MRPL32          | NM_031903    | 67.85831254 | 4.395404779 | 8.17E-06    | 15.43846721 |
| ZNF296          | NM_145288    | 100.6458792 | 25.05356321 | 0.000483128 | 4.017228144 |
| PLEKHO2         | NM_001195059 | 160.4893408 | 10.28468768 | 3.03E-12    | 15.60468785 |
| PAXBP1-AS1      | NR_038879    | 75.38729997 | 5.644324052 | 1.49E-05    | 13.35630259 |
| OAT             | NM_000274    | 195.9485244 | 8.427811892 | 2.95E-16    | 23.2502252  |
| RC3H2           | NM_018835    | 158.2548744 | 4.038770656 | 7.83E-14    | 39.18392202 |
| SOBP            | NM_018013    | 62.95222924 | 4.01623275  | 1.81E-05    | 15.67444746 |
| MKL1            | NM_001282662 | 119.6869232 | 4.598732229 | 9.94E-10    | 26.02606919 |
| SUSD1           | NM_001282643 | 87.77365781 | 5.394720738 | 5.42E-07    | 16.27028758 |
| EMP2            | NM_001424    | 60.76647581 | 6.587787714 | 0.000156565 | 9.224109588 |
| UBAC2           | NM_001144072 | 184.8736186 | 5.424209801 | 1.52E-15    | 34.08305088 |
| ABCC4           | NM_005845    | 79.8075197  | 1.454343766 | 4.14E-07    | 54.87527884 |
| TTC1            | NM_001282500 | 36.8193486  | 2.315012581 | 0.003303353 | 15.90459979 |
| SEC22C          | NM_032970    | 97.09996085 | 5.400842977 | 4.16E-08    | 17.97866764 |
| THAP9-AS1       | NR_034077    | 67.85831254 | 11.95104996 | 0.000588768 | 5.67802099  |
| H3F3A           | NM_002107    | 131.1989796 | 8.182085679 | 8.57E-11    | 16.03490659 |
| TMEM41A         | NM_080652    | 115.752567  | 10.5152087  | 2.23E-08    | 11.00810933 |
| DAD1            | NM_001344    | 83.35343807 | 3.870485104 | 4.88E-07    | 21.5356566  |
| ANXA5           | NM_001154    | 150.2887363 | 3.454170877 | 3.90E-14    | 43.50935192 |
| MID2            | NM_012216    | 31.47611462 | 1.283450249 | 0.001947802 | 24.5246083  |
| C18orf32        | NM_001035005 | 164.4724099 | 6.981140915 | 2.53E-14    | 23.55953158 |
| SH2B3           | NM_005475    | 72.71568297 | 10.72409564 | 0.000243259 | 6.780588819 |
| PPP5C           | NM_006247    | 78.93321834 | 10.79786156 | 4.89E-05    | 7.31007875  |
| DRAM1           | NM_018370    | 113.5181006 | 2.781814959 | 6.08E-11    | 40.80720761 |
| LOC728730       | NR_037875    | 89.57097344 | 1.801077912 | 5.50E-08    | 49.73187048 |
| NDUFS7          | NM_024407    | 140.0881319 | 27.47592255 | 1.27E-06    | 5.098577917 |

|              |              |             |             |             |             |
|--------------|--------------|-------------|-------------|-------------|-------------|
| PTENP1-AS    | NR_103745    | 35.02203299 | 3.124444932 | 0.003785106 | 11.20904152 |
| TNIP2        | NM_001292016 | 126.7787599 | 15.167221   | 5.32E-08    | 8.358733609 |
| CASP3        | NM_032991    | 42.11386972 | 2.540010242 | 0.000658396 | 16.58019681 |
| UBXN2A       | NM_181713    | 121.9213894 | 3.245764555 | 1.68E-11    | 37.56322659 |
| ISOC1        | NM_016048    | 93.11689181 | 4.379088662 | 2.74E-08    | 21.2639887  |
| SGK3         | NM_001033578 | 86.89935644 | 4.311259461 | 9.37E-07    | 20.15637361 |
| INTS5        | NM_030628    | 161.8495057 | 27.45746813 | 2.25E-08    | 5.894553166 |
| ZNF398       | NM_170686    | 101.9573313 | 5.288711127 | 1.21E-08    | 19.27829462 |
| HSF2BP       | NM_007031    | 101.0830299 | 2.700697818 | 5.03E-09    | 37.42848579 |
| PGPEP1       | NM_017712    | 101.5201806 | 12.81444305 | 2.00E-06    | 7.92232485  |
| SNX3         | NM_152827    | 51.00302207 | 5.304086154 | 0.000838217 | 9.615798195 |
| HSP90AA1     | NM_001017963 | 73.15283366 | 12.25412024 | 0.00015372  | 5.969652021 |
| STAU2        | NM_014393    | 70.04406598 | 2.891691323 | 2.84E-06    | 24.22252522 |
| FOXA3        | NM_004497    | 109.4863187 | 13.30894363 | 8.07E-07    | 8.226522085 |
| TMEM52B      | NM_001079815 | 34.58488231 | 1.862403776 | 0.004132369 | 18.57002372 |
| ZCCHC11      | NM_015269    | 113.4693878 | 2.073563149 | 1.76E-10    | 54.72193496 |
| UBE2G1       | NM_003342    | 120.1240738 | 5.153712962 | 7.14E-10    | 23.30825847 |
| MIPEPP3      | NR_038939    | 75.38729997 | 6.155505557 | 6.62E-06    | 12.24713377 |
| RHOG         | NM_001665    | 120.1240738 | 13.17041215 | 1.33E-07    | 9.120752822 |
| TGFA         | NM_003236    | 80.68182108 | 5.417353578 | 2.93E-06    | 14.89321676 |
| ZNF623       | NM_001082480 | 159.6150394 | 10.97770951 | 7.83E-12    | 14.53992194 |
| DCAF17       | NR_028482    | 106.4262639 | 2.834621555 | 5.55E-10    | 37.54514026 |
| HSD11B2      | NM_000196    | 117.0153061 | 20.48850231 | 4.06E-06    | 5.711266952 |
| CCNT2        | NR_037649    | 72.27853228 | 3.101595282 | 1.42E-06    | 23.30366335 |
| UBE3A        | NM_000462    | 77.13590271 | 1.433618135 | 4.31E-07    | 53.80505507 |
| RSL24D1      | NM_016304    | 37.2564993  | 2.260376151 | 0.001971585 | 16.48243337 |
| ZBED5        | NM_001143667 | 87.33650713 | 15.72320393 | 8.12E-05    | 5.554625348 |
| RASA1        | NM_002890    | 58.09485881 | 3.546229799 | 5.75E-05    | 16.38214727 |
| CCDC3        | NM_031455    | 69.60691528 | 4.381293592 | 2.91E-05    | 15.88729763 |
| SEC24D       | NM_014822    | 77.13590271 | 2.373170884 | 6.47E-07    | 32.50330738 |
| USP18        | NM_017414    | 57.65770813 | 3.137571524 | 3.00E-05    | 18.37653984 |
| GIN1         | NM_017676    | 57.65770813 | 3.439137343 | 3.68E-05    | 16.7651659  |
| RNGTT        | NM_001286426 | 54.54894044 | 2.602397478 | 0.000114486 | 20.96103339 |
| SMARCAL1     | NM_001127207 | 45.22263741 | 3.317885181 | 0.000591468 | 13.62995853 |
| LOC101926941 | NR_120664    | 48.33140508 | 6.420276278 | 0.001687234 | 7.527932287 |
| CCDC124      | NM_001136203 | 100.6458792 | 14.99980801 | 6.22E-06    | 6.709811163 |
| RANBP2       | NM_006267    | 102.4431948 | 1.14528562  | 3.41E-10    | 89.44772643 |
| POLM         | NM_001284330 | 101.5201806 | 17.58903291 | 1.19E-05    | 5.771788655 |
| C17orf70     | NR_033338    | 127.7017741 | 30.50532085 | 2.37E-05    | 4.186213113 |
| EIF5B        | NM_015904    | 98.89727652 | 3.544803368 | 3.50E-09    | 27.89922775 |
| C4orf32      | NM_152400    | 77.13590271 | 5.010529596 | 3.67E-06    | 15.39476042 |
| KLHL9        | NM_018847    | 107.737716  | 3.912241026 | 1.38E-10    | 27.53861924 |
| RBM26        | NM_001286631 | 87.33650713 | 1.905536259 | 3.55E-08    | 45.83303346 |
| RMI2         | NM_152308    | 80.2446704  | 19.52600201 | 0.001380938 | 4.10963137  |
| NOL10        | NM_001261394 | 91.31957618 | 3.886155935 | 3.72E-08    | 23.49869066 |
| C5orf63      | NM_001164479 | 41.67671904 | 1.868644636 | 0.000671926 | 22.30318072 |
| KATNAL1      | NM_032116    | 74.51299858 | 3.036931992 | 1.30E-06    | 24.53561647 |
| FLCN         | NM_144997    | 96.22565948 | 10.62095214 | 1.34E-06    | 9.059984287 |
| NASP         | NM_002482    | 171.5642466 | 9.717017728 | 4.11E-13    | 17.65605985 |
| RAP1B        | NM_015646    | 108.6120173 | 4.692802385 | 4.30E-09    | 23.14438334 |
| TAF1B        | NM_005680    | 129.4503768 | 3.600727304 | 9.05E-12    | 35.95117482 |
| SPG7         | NM_003119    | 214.115267  | 18.95475084 | 4.07E-14    | 11.29612669 |
| SERPINB1     | NM_030666    | 64.31239418 | 5.77357738  | 6.43E-05    | 11.13908933 |
| ZCCHC7       | NM_001289120 | 109.4863187 | 3.05886859  | 1.16E-09    | 35.79307692 |
| ARHGEF5      | NM_005435    | 138.8253928 | 12.16317889 | 1.13E-09    | 11.41357814 |
| RGS5         | NM_001254748 | 30.16466256 | 0.487148114 | 0.001775542 | 61.92092654 |
| ETS2         | NM_001256295 | 60.76647581 | 6.794492451 | 0.00043958  | 8.943490077 |
| DHDH         | NM_014475    | 101.9573313 | 9.994551096 | 6.47E-07    | 10.20129171 |
| KCNS3        | NM_002252    | 29.2903612  | 1.000580191 | 0.003095382 | 29.27337704 |
| PLEKHA1      | NM_001001974 | 46.14565165 | 5.104483408 | 0.002652451 | 9.040219738 |
| TRAFD1       | NM_001143906 | 85.58790438 | 5.602143576 | 4.50E-07    | 15.27770633 |
| NKAP         | NM_024528    | 33.71058093 | 2.866445109 | 0.004742173 | 11.76041391 |

|              |              |             |             |             |             |
|--------------|--------------|-------------|-------------|-------------|-------------|
| TMEM131      | NM_015348    | 138.2908163 | 3.009107081 | 2.82E-12    | 45.95742609 |
| BTG1         | NM_001731    | 66.06099693 | 11.83266247 | 0.000806463 | 5.582935969 |
| DENND4A      | NM_001144823 | 62.95222924 | 2.870477727 | 1.63E-05    | 21.93092413 |
| TIGD3        | NM_145719    | 140.9624333 | 31.30227921 | 1.13E-05    | 4.503264199 |
| MAML1        | NM_014757    | 63.87524348 | 5.940938811 | 8.12E-05    | 10.7517087  |
| LLGL2        | NM_001015002 | 179.9675353 | 20.83148813 | 7.96E-11    | 8.639206867 |
| PDCD4        | NM_014456    | 40.80241766 | 3.121171639 | 0.001587548 | 13.0727888  |
| LOC100272217 | NR_027440    | 93.99119317 | 8.860130065 | 2.20E-06    | 10.60833108 |
| PPM1E        | NM_014906    | 36.38219793 | 3.440222815 | 0.003973211 | 10.57553533 |
| UGDH-AS1     | NR_047679    | 90.00812411 | 4.855844585 | 2.20E-07    | 18.5360389  |
| KCNG3        | NM_172344    | 37.2564993  | 2.102698419 | 0.003167806 | 17.71842265 |
| PRKRIP1      | NM_024653    | 112.1579357 | 9.047823604 | 7.72E-08    | 12.39612316 |
| RPS15A       | NM_001019    | 109.9721823 | 15.80505343 | 2.27E-06    | 6.958039262 |
| ADPGK        | NR_023319    | 78.05891695 | 6.384298721 | 1.65E-05    | 12.22670185 |
| CASC2        | NR_026939    | 105.9891132 | 1.521830969 | 1.09E-09    | 69.6457855  |
| FBXL5        | NM_001193535 | 69.1697646  | 1.52560803  | 1.75E-06    | 45.3391456  |
| GART         | NM_001136006 | 104.6289483 | 5.201067715 | 6.95E-09    | 20.11682101 |
| CRTC3        | NM_001042574 | 130.3246782 | 4.967097198 | 7.24E-11    | 26.23759371 |
| NKTR         | NM_005385    | 130.3246782 | 4.524072649 | 2.58E-11    | 28.80693753 |
| EPN2         | NM_148921    | 137.4165149 | 8.147631795 | 1.80E-10    | 16.8658229  |
| CAMK1        | NM_003656    | 119.2497724 | 15.46477674 | 1.42E-07    | 7.711056839 |
| CCDC15       | NM_025004    | 59.40631088 | 1.550036775 | 2.07E-05    | 38.32574287 |
| PSMD4        | NM_002810    | 110.4093329 | 3.122698243 | 4.52E-11    | 35.35702918 |
| PRKX         | NM_005044    | 59.84346156 | 1.633820392 | 2.38E-05    | 36.6279316  |
| GOLGA7       | NM_016099    | 65.62384623 | 1.882022662 | 1.36E-06    | 34.86878642 |
| DTWD1        | NM_001144955 | 155.1461068 | 0.16072571  | 6.89E-24    | 965.2849393 |
| PIGA         | NM_020473    | 58.96916018 | 0.542241289 | 3.50E-07    | 108.7507746 |
| SRSF11       | NM_001190987 | 48.76855577 | 4.510652435 | 0.001419886 | 10.81186291 |
| ABHD10       | NM_001272069 | 108.1748666 | 7.420046367 | 8.51E-09    | 14.5787319  |
| PICALM       | NM_007166    | 58.09485881 | 2.723561493 | 5.34E-05    | 21.33047444 |
| TLN1         | NM_006289    | 80.2446704  | 9.729256283 | 4.43E-05    | 8.247770237 |
| LOC101929224 | NR_110787    | 112.5950864 | 5.054519036 | 9.62E-10    | 22.27612273 |
| ZNF165       | NM_003447    | 70.04406598 | 8.073449777 | 8.69E-05    | 8.675853311 |
| C2orf42      | NM_017880    | 123.2328415 | 7.020033741 | 1.53E-09    | 17.55445145 |
| PEBP1        | NM_002567    | 69.1697646  | 8.86382844  | 0.000187879 | 7.803599209 |
| C21orf2      | NM_001271441 | 100.2087285 | 24.75342375 | 0.000384232 | 4.048277505 |
| MAP3K5       | NM_005923    | 55.86039251 | 2.466035392 | 5.99E-05    | 22.6519022  |
| RHBDD2       | NM_001040457 | 158.2548744 | 16.55424768 | 6.69E-10    | 9.559774476 |
| ACOX1        | NM_004035    | 60.76647581 | 6.421667491 | 0.00014305  | 9.462725359 |
| RRP15        | NM_016052    | 50.5658714  | 1.948173895 | 0.000126697 | 25.95552252 |
| GMD5-AS1     | NR_046229    | 48.33140508 | 1.152515375 | 3.78E-05    | 41.9355838  |
| PDE3B        | NM_000922    | 34.14773161 | 0.488301806 | 0.000948683 | 69.93161035 |
| SEC63        | NM_007214    | 44.78548671 | 2.632868056 | 0.000594285 | 17.01015234 |
| SNRK         | NM_017719    | 116.1410048 | 3.582341331 | 7.79E-11    | 32.42041839 |
| RNF13        | NM_007282    | 161.8007928 | 3.584564873 | 9.75E-15    | 45.13819629 |
| UBE2L3       | NR_046082    | 172.438548  | 7.72647396  | 9.97E-14    | 22.31788379 |
| MRPL37       | NM_016491    | 114.8295527 | 6.436655337 | 2.70E-09    | 17.8399412  |
| PPAT         | NM_002703    | 85.58790438 | 2.935420148 | 4.97E-08    | 29.15695201 |
| CHAF1B       | NM_005441    | 115.7038541 | 4.366076552 | 5.84E-10    | 26.50064715 |
| DOCK7        | NM_001272002 | 82.91628738 | 2.055933968 | 1.59E-07    | 40.33022884 |
| OSBPL6       | NM_001201480 | 54.54894044 | 2.552800449 | 0.000108159 | 21.36827439 |
| SLC25A24     | NM_013386    | 66.06099693 | 1.126231604 | 3.35E-06    | 58.65667121 |
| CPSF6        | NM_007007    | 90.4452748  | 5.050454302 | 1.40E-07    | 17.90834436 |
| NEIL2        | NM_145043    | 63.38937993 | 2.199789161 | 2.90E-06    | 28.81611614 |
| GAS8         | NM_001286209 | 88.2108085  | 20.55307666 | 0.00061473  | 4.291854205 |
| SBF2         | NM_030962    | 96.66281017 | 2.998820837 | 1.54E-08    | 32.23360629 |
| SLC5A3       | NM_006933    | 105.5032497 | 3.880021656 | 3.72E-09    | 27.19140742 |
| SCLT1        | NM_144643    | 54.98609113 | 1.440603629 | 9.87E-05    | 38.16878566 |
| ZHX1-C8orf76 | NM_001204180 | 123.2328415 | 8.166584734 | 2.03E-09    | 15.08988708 |
| EP300-AS1    | NR_110514    | 52.31447414 | 7.140302501 | 0.002028608 | 7.326646753 |
| ZFP62        | NM_001172638 | 121.9213894 | 8.36391525  | 1.88E-09    | 14.57707136 |
| ALAD         | NM_000031    | 66.06099693 | 7.929097984 | 0.00012719  | 8.331464317 |

|                 |              |             |             |             |             |
|-----------------|--------------|-------------|-------------|-------------|-------------|
| PIGO            | NM_032634    | 133.4334458 | 14.14545516 | 9.51E-09    | 9.432955274 |
| SAP30BP         | NM_013260    | 79.37036901 | 15.69618389 | 0.000447747 | 5.056666611 |
| ATE1-AS1        | NR_120495    | 136.5422136 | 3.332890984 | 5.74E-13    | 40.96810075 |
| SLC44A1         | NM_001286730 | 93.55404248 | 0.760582657 | 4.55E-10    | 123.0031235 |
| KIAA1551        | NM_018169    | 73.15283366 | 3.261259212 | 6.47E-07    | 22.43085535 |
| CCDC51          | NM_001256968 | 100.6458792 | 14.26721451 | 3.99E-06    | 7.054346815 |
| CHERP           | NM_006387    | 94.91420746 | 16.72708147 | 3.29E-05    | 5.674283802 |
| KIF21A          | NM_017641    | 71.8413816  | 1.369662568 | 1.98E-06    | 52.4518836  |
| CDC42SE2        | NM_001038702 | 128.5760755 | 2.916874893 | 1.06E-11    | 44.08007894 |
| ACOT13          | NM_018473    | 73.15283366 | 5.186597312 | 6.42E-06    | 14.10420537 |
| AFF1            | NM_001166693 | 90.4452748  | 3.710085249 | 4.37E-08    | 24.3782201  |
| ARHGAP19-SLIT1  | NR_037909    | 105.066099  | 4.538431219 | 1.56E-08    | 23.15031206 |
| SNRPA           | NM_004596    | 85.58790438 | 16.03027988 | 0.000120021 | 5.339139744 |
| COX11           | NR_027942    | 126.3416091 | 9.313791777 | 1.84E-09    | 13.56500254 |
| PPP6R3          | NM_001164162 | 80.68182108 | 6.3302514   | 3.24E-06    | 12.7454371  |
| RSPH3           | NM_031924    | 128.1389248 | 4.903094837 | 1.31E-11    | 26.13429457 |
| DIRC2           | NM_032839    | 93.55404248 | 1.596609321 | 7.61E-09    | 58.59545054 |
| TAF11           | NM_001270488 | 54.11178977 | 4.882766094 | 0.00019863  | 11.08219987 |
| RAB22A          | NM_020673    | 159.5663266 | 2.880283327 | 2.09E-15    | 55.39952443 |
| VPS13D          | NM_018156    | 76.26160134 | 3.688762503 | 9.38E-07    | 20.67403398 |
| ZNF697          | NM_001080470 | 52.75162482 | 3.696828473 | 0.000625232 | 14.26942721 |
| STK38           | NM_007271    | 106.4262639 | 3.458151955 | 7.89E-10    | 30.7754735  |
| CRCP            | NR_024548    | 88.25952138 | 4.707584813 | 2.78E-07    | 18.74836565 |
| C11orf71        | NM_019021    | 72.27853228 | 2.73311267  | 7.90E-07    | 26.44550042 |
| FAM189B         | NM_198264    | 97.97426223 | 14.24143291 | 7.61E-06    | 6.879522785 |
| PRELID2         | NM_182960    | 91.75672686 | 0.748779704 | 2.64E-10    | 122.5416854 |
| PRPH2           | NM_000322    | 63.38937993 | 9.4697347   | 0.00100527  | 6.69389185  |
| ANKHD1-EIF4EBP3 | NM_020690    | 50.5658714  | 4.540249705 | 0.000947536 | 11.13724458 |
| DNAH2           | NM_020877    | 43.91118534 | 6.62231879  | 0.004952762 | 6.630786999 |
| DEPDC1          | NM_001114120 | 42.11386972 | 5.760623956 | 0.00398409  | 7.310643784 |
| POLR2F          | NM_001301129 | 94.42834386 | 10.86268291 | 1.67E-06    | 8.692911745 |
| KBTBD4          | NR_024222    | 115.7038541 | 11.47403859 | 9.65E-08    | 10.08396941 |
| ZNF543          | NM_213598    | 100.6458792 | 3.942375777 | 6.66E-09    | 25.52924553 |
| ZNF700          | NM_144566    | 108.6120173 | 2.702954517 | 6.23E-11    | 40.18270253 |
| FGF2            | NM_002006    | 38.13080067 | 2.914906819 | 0.003584995 | 13.08131032 |
| ING5            | NM_032329    | 78.01020409 | 10.55208949 | 7.18E-05    | 7.392867938 |
| MRPL3           | NM_007208    | 89.13382275 | 1.858132032 | 1.22E-08    | 47.96958517 |
| MTHFD2L         | NM_001144978 | 158.2548744 | 4.673867045 | 4.06E-13    | 33.85951566 |
| SPTAN1          | NM_001130438 | 224.753022  | 8.489942621 | 1.63E-18    | 26.47285524 |
| MARVELD2        | NM_001244734 | 83.79058876 | 4.44630664  | 6.47E-07    | 18.84498653 |
| GNRHR2          | NR_002328    | 66.06099693 | 14.36226574 | 0.002625565 | 4.599622239 |
| ARIH2           | NM_006321    | 114.392402  | 5.810209907 | 1.97E-09    | 19.68817027 |
| AFG3L2          | NM_006796    | 161.3636422 | 6.093692719 | 5.99E-13    | 26.48043635 |
| NOS1AP          | NM_001164757 | 57.65770813 | 2.577326002 | 6.19E-05    | 22.37113508 |
| SPAG5-AS1       | NR_040012    | 129.4503768 | 9.965306978 | 1.28E-09    | 12.99010428 |
| CLEC16A         | NM_001243403 | 81.11897176 | 7.291010951 | 1.56E-05    | 11.12588807 |
| FAT1            | NM_005245    | 43.47403467 | 6.661069715 | 0.004993269 | 6.526584548 |
| CYP4F3          | NM_000896    | 50.5658714  | 6.619519819 | 0.00239371  | 7.638903241 |
| PHF20           | NM_016436    | 148.4914208 | 3.944007305 | 2.58E-13    | 37.64988483 |
| XPNPEP3         | NM_022098    | 73.58998434 | 5.152329453 | 8.57E-06    | 14.28285691 |
| MRPS25          | NM_022497    | 163.5981085 | 11.72257201 | 4.39E-12    | 13.95582031 |
| STIL            | NM_001282937 | 80.2446704  | 1.60655173  | 1.55E-07    | 49.94838878 |
| INHBE           | NM_031479    | 47.8942544  | 3.989482569 | 0.000451617 | 12.00512938 |
| ATG7            | NM_001136031 | 58.5320095  | 3.413824882 | 6.32E-05    | 17.14558055 |
| PTK7            | NM_152882    | 119.6869232 | 7.067448577 | 4.80E-09    | 16.93495494 |
| ADAT1           | NR_036460    | 61.2036265  | 4.880432804 | 0.000106177 | 12.54061452 |
| SEPT7-AS1       | NR_120511    | 56.29754319 | 1.498105858 | 2.49E-05    | 37.57914896 |
| AZIN1           | NM_015878    | 167.1440268 | 8.795462054 | 7.24E-13    | 19.00343902 |
| NEDD8-MDP1      | NM_001199823 | 100.6458792 | 10.11927414 | 5.60E-07    | 9.945958356 |
| HNRNPUL2-BSCL2  | NR_037946    | 85.58790438 | 14.92014121 | 5.67E-05    | 5.736400424 |
| PLCE1           | NM_001288989 | 51.87732345 | 1.99523934  | 0.000203378 | 26.00055162 |
| SCAF4           | NM_001145445 | 112.1579357 | 4.888905908 | 2.95E-09    | 22.94131607 |

|          |              |             |             |             |             |
|----------|--------------|-------------|-------------|-------------|-------------|
| NDEL1    | NM_001025579 | 115.7038541 | 4.704604661 | 6.95E-10    | 24.59374644 |
| NOSIP    | NM_001270960 | 109.9721823 | 10.7768177  | 1.35E-07    | 10.20451355 |
| FLJ37453 | NR_024279    | 116.5781554 | 21.92100891 | 9.89E-06    | 5.318101731 |
| RHBDD1   | NM_001167608 | 105.066099  | 3.991358265 | 2.01E-09    | 26.3233947  |
| ZNF205   | NM_001042428 | 129.8875276 | 24.91857376 | 2.23E-06    | 5.212478404 |
| C1orf50  | NR_040733    | 130.8105418 | 6.933618598 | 3.60E-11    | 18.86612884 |
| DHX8     | NM_004941    | 75.82445064 | 2.306161466 | 2.70E-07    | 32.87907276 |
| UBE2D2   | NM_003339    | 94.86549455 | 6.573296914 | 1.41E-07    | 14.43195033 |
| CBX1     | NM_006807    | 87.82237075 | 7.069797064 | 1.61E-06    | 12.42219118 |
| SLC25A37 | NM_016612    | 51.87732345 | 9.200194434 | 0.003032494 | 5.638720336 |
| KDEL2    | NM_153705    | 140.0881319 | 2.87232049  | 2.47E-13    | 48.77176222 |
| TMEM68   | NM_152417    | 118.375471  | 3.713627174 | 2.70E-10    | 31.87597071 |
| PALB2    | NM_024675    | 89.57097344 | 3.224396871 | 2.53E-08    | 27.77914041 |
| ERMP1    | NM_024896    | 62.51507855 | 4.078827567 | 7.33E-05    | 15.32672748 |
| FNTB     | NM_002028    | 41.23956835 | 4.021108949 | 0.002069791 | 10.25576996 |
| PPP1CC   | NM_001244974 | 154.7089561 | 8.304300657 | 5.26E-12    | 18.62998012 |
| ANKRD6   | NM_014942    | 92.19387756 | 3.275257332 | 4.21E-08    | 28.14859054 |
| COQ10B   | NM_025147    | 43.91118534 | 4.547744033 | 0.003660264 | 9.655597374 |
| NOB1     | NR_074074    | 104.1917976 | 13.54884755 | 3.83E-06    | 7.690085613 |
| ZC2HC1A  | NM_016010    | 108.6120173 | 1.836542006 | 1.43E-10    | 59.13941361 |
| ELAC2    | NM_173717    | 53.67463907 | 8.304881896 | 0.001610014 | 6.463022562 |
| NBPF1    | NM_017940    | 176.9561934 | 13.3993332  | 1.66E-12    | 13.20634323 |
| DCP1B    | NM_152640    | 62.07792787 | 2.137931207 | 1.02E-05    | 29.03644779 |
| TRPM4    | NM_001195227 | 134.3077472 | 9.095791094 | 2.35E-10    | 14.76592259 |
| UFL1     | NM_015323    | 87.82237075 | 0.210828347 | 5.81E-13    | 416.5586466 |
| THAP1    | NM_199003    | 73.58998434 | 6.290173821 | 5.33E-06    | 11.69919726 |
| MRPL42   | NR_038161    | 112.1579357 | 3.694899109 | 1.09E-09    | 30.35480331 |
| BPTF     | NM_004459    | 173.75      | 5.125906998 | 1.39E-14    | 33.89644019 |
| CNIH4    | NM_001277200 | 36.8193486  | 3.033464312 | 0.002741012 | 12.13772269 |
| EPHB2    | NM_017449    | 113.4693878 | 9.072064126 | 2.10E-08    | 12.50756015 |
| COA5     | NM_001008215 | 122.3585401 | 5.607819032 | 2.06E-10    | 21.81927401 |
| CDKN2B   | NM_078487    | 88.25952138 | 2.888273201 | 1.53E-08    | 30.55788536 |
| VIM-AS1  | NR_108061    | 86.46220574 | 9.050886854 | 8.45E-06    | 9.552898754 |
| DDX23    | NM_004818    | 78.93321834 | 6.711150894 | 7.38E-06    | 11.76150255 |
| XPA      | NR_027302    | 93.55404248 | 7.889432555 | 4.04E-07    | 11.85814592 |
| KHSRP    | NM_003685    | 94.86549455 | 21.68553061 | 0.000185406 | 4.374598725 |
| PTPN1    | NM_002827    | 111.7207851 | 8.058236606 | 2.70E-08    | 13.86417284 |
| RABIF    | NM_002871    | 61.64077717 | 12.65166002 | 0.002225328 | 4.872149353 |
| MCAT     | NM_173467    | 94.42834386 | 16.35167669 | 5.90E-05    | 5.774841665 |
| EXOC2    | NR_073064    | 58.5320095  | 0.867447574 | 4.90E-06    | 67.47613485 |
| FARP2    | NM_014808    | 144.5083517 | 6.543261109 | 4.94E-12    | 22.08506574 |
| CEP89    | NM_032816    | 58.96916018 | 2.508619259 | 2.64E-05    | 23.50662021 |
| MAPKAPK5 | NM_139078    | 128.5760755 | 4.58936402  | 5.46E-11    | 28.01609874 |
| ZBTB49   | NM_145291    | 62.07792787 | 7.019102834 | 0.000305828 | 8.844139962 |
| GNAQ     | NM_002072    | 38.13080067 | 0.859408554 | 0.000571257 | 44.36865386 |
| RNF135   | NM_001184992 | 116.1410048 | 6.235282497 | 2.95E-09    | 18.62642227 |
| MOB1A    | NM_018221    | 132.5591446 | 4.121767747 | 4.05E-12    | 32.16075061 |
| PLA2G6   | NM_001004426 | 83.35343807 | 10.54516143 | 3.15E-05    | 7.904425043 |
| THUMPD2  | NR_028102    | 138.2908163 | 1.741901755 | 5.17E-14    | 79.39070954 |
| RPL36AL  | NM_001001    | 114.8295527 | 19.67591328 | 8.20E-06    | 5.836046901 |
| HMCN1    | NM_031935    | 33.27343024 | 0.055810188 | 0.000463234 | 596.1891844 |
| LRRIC1   | NM_018214    | 40.36526697 | 3.246506481 | 0.002135311 | 12.43344722 |
| RABGGTB  | NR_073562    | 97.09996085 | 16.3899051  | 2.84E-05    | 5.924376026 |
| TNPO1    | NM_153188    | 161.8007928 | 4.100023707 | 3.95E-14    | 39.46337983 |
| PEX13    | NM_002618    | 118.375471  | 3.409451383 | 2.24E-10    | 34.71980026 |
| TAF12    | NM_005644    | 169.7669309 | 9.673860321 | 9.13E-13    | 17.54903682 |
| RPS3     | NM_001260506 | 185.74792   | 24.27697619 | 9.06E-11    | 7.651196697 |
| ARL5B    | NM_178815    | 94.42834386 | 1.770000277 | 3.26E-10    | 53.34933845 |
| ERCC2    | NM_000400    | 59.40631088 | 14.68069258 | 0.004495562 | 4.046560511 |
| IPO9     | NM_018085    | 142.759749  | 9.206215274 | 2.29E-10    | 15.50688798 |
| SCARB2   | NM_001204255 | 75.38729997 | 4.293386939 | 7.09E-06    | 17.55893448 |
| RPS6KA4  | NM_003942    | 76.26160134 | 10.04587418 | 4.62E-05    | 7.591335508 |



|           |              |             |             |             |             |
|-----------|--------------|-------------|-------------|-------------|-------------|
| ARL6IP1   | NM_015161    | 189.2938384 | 10.63145984 | 8.28E-15    | 17.80506547 |
| TRMT61B   | NM_017910    | 80.68182108 | 4.871200645 | 1.00E-06    | 16.56302562 |
| IQCH      | NM_001031715 | 97.53711154 | 2.706530613 | 1.27E-08    | 36.03769013 |
| PPP1CB    | NM_206876    | 59.40631088 | 5.434211217 | 0.0001486   | 10.93191054 |
| DSTYK     | NM_199462    | 121.0470881 | 4.491504705 | 4.88E-10    | 26.95023072 |
| ARID1A    | NM_139135    | 176.421617  | 6.887954981 | 4.68E-14    | 25.61306186 |
| FLJ31104  | NR_102755    | 83.79058876 | 7.906125965 | 6.38E-06    | 10.5981854  |
| ARHGEF18  | NM_015318    | 60.32932513 | 5.748769234 | 0.000164665 | 10.49430281 |
| ALAS1     | NM_000688    | 125.4673077 | 7.947159935 | 1.29E-09    | 15.7876913  |
| RAB28     | NM_001017979 | 91.75672686 | 0.83999675  | 7.08E-10    | 109.2346213 |
| SKAP1     | NM_003726    | 67.85831254 | 4.470525793 | 3.37E-05    | 15.17904508 |
| ZNF649    | NM_023074    | 40.80241766 | 1.840728109 | 0.00084134  | 22.16645547 |
| RPS19BP1  | NM_194326    | 92.24259043 | 20.60556779 | 0.000258711 | 4.476585716 |
| LOC730102 | NR_037167    | 36.38219793 | 2.975111354 | 0.003046779 | 12.2288525  |
| SMARCE1   | NM_003079    | 117.5011696 | 4.403149128 | 1.15E-10    | 26.68571203 |
| ZNF174    | NM_001032292 | 60.32932513 | 11.07248102 | 0.001658659 | 5.448582391 |
| ZSCAN2    | NM_017894    | 70.91836734 | 10.8383124  | 0.000237597 | 6.543303492 |
| SAP30     | NM_003864    | 72.71568297 | 10.89256413 | 0.00027509  | 6.675717682 |
| CLNS1A    | NM_001293    | 110.8464837 | 1.013523692 | 4.90E-13    | 109.3674323 |
| ARF4      | NM_001660    | 73.20154654 | 8.174358871 | 3.03E-05    | 8.955019922 |
| CFAP221   | NM_001271049 | 45.65978809 | 3.216656497 | 0.000634044 | 14.19479765 |
| DCAF7     | NR_073585    | 70.09277885 | 9.800289126 | 0.000236752 | 7.152113367 |
| MAPRE3    | NM_012326    | 72.71568297 | 6.977601399 | 6.72E-05    | 10.42130079 |
| SDHD      | NM_001276506 | 49.69157001 | 6.281633216 | 0.002846225 | 7.910613101 |
| MRPS28    | NM_014018    | 82.91628738 | 3.522187487 | 2.19E-07    | 23.54113394 |
| KIAA1549L | NM_012194    | 38.13080067 | 4.181615387 | 0.003908711 | 9.118677147 |
| CKS2      | NM_001827    | 92.24259043 | 10.69386271 | 8.86E-06    | 8.625750387 |
| FAM46A    | NM_017633    | 135.6679122 | 6.359201824 | 5.05E-12    | 21.33411016 |
| RFC5      | NM_001206801 | 111.7207851 | 10.9810791  | 1.87E-07    | 10.17393501 |
| TMEM64    | NM_001146273 | 136.9793643 | 4.566793012 | 1.56E-12    | 29.99465137 |
| PSMB2     | NM_002794    | 50.12872071 | 5.324359886 | 0.0008102   | 9.414976031 |
| PTPDC1    | NM_177995    | 103.3174962 | 2.147574935 | 1.36E-09    | 48.10891323 |
| PLAU      | NM_001145031 | 106.4262639 | 17.20464292 | 1.07E-05    | 6.185903674 |
| WWP1      | NM_007013    | 119.2497724 | 2.578181059 | 5.97E-11    | 46.25345144 |
| LYRM9     | NM_001076680 | 115.2667034 | 3.303806919 | 4.54E-11    | 34.88905562 |
| SKA3      | NM_145061    | 137.4165149 | 3.848438152 | 8.21E-13    | 35.70708674 |
| EXD3      | NM_017820    | 105.066099  | 10.60818329 | 4.61E-07    | 9.904249965 |
| ANKRD16   | NM_019046    | 114.8295527 | 7.383978697 | 6.59E-09    | 15.55117606 |
| SLC35C1   | NM_001145266 | 73.58998434 | 15.89572655 | 0.000726555 | 4.629545187 |
| NELFB     | NM_015456    | 168.0183282 | 16.17190437 | 5.76E-11    | 10.38952027 |
| STX2      | NM_001980    | 88.64795919 | 2.958556488 | 3.11E-08    | 29.96324712 |
| UBL7-AS1  | NR_038449    | 59.40631088 | 5.52429699  | 0.000100529 | 10.75364177 |
| COQ10A    | NM_144576    | 121.4842387 | 18.48328789 | 1.23E-06    | 6.57265306  |
| RICTOR    | NM_001285439 | 51.87732345 | 1.653118399 | 0.000171018 | 31.381493   |
| PYROXD2   | NM_032709    | 124.5930065 | 10.22315108 | 4.84E-09    | 12.18733886 |
| RALGAPA1  | NM_194301    | 84.66489013 | 2.109858778 | 1.36E-07    | 40.12822613 |
| WBSR22    | NM_001202560 | 73.15283366 | 11.76561328 | 0.000302653 | 6.21751131  |
| LSM10     | NM_032881    | 110.8464837 | 12.81413149 | 2.80E-07    | 8.650331378 |
| ZNF805    | NM_001145078 | 57.65770813 | 0.873056744 | 4.31E-06    | 66.04119211 |
| GOLGA5    | NM_005113    | 71.8413816  | 2.563496873 | 1.33E-06    | 28.02475882 |
| RABEPK    | NM_001174152 | 98.41141291 | 3.984848606 | 2.89E-08    | 24.69639945 |
| NRD1      | NM_001101662 | 46.58280234 | 5.990502447 | 0.002816102 | 7.776109392 |
| MFAP3     | NM_001135037 | 63.43809281 | 1.096085519 | 8.93E-07    | 57.87695548 |
| MRM1      | NM_024864    | 56.34625608 | 10.98037752 | 0.004821303 | 5.131540874 |
| YTHDF1    | NM_017798    | 93.55404248 | 10.36389248 | 2.04E-06    | 9.026921364 |
| CDH24     | NM_022478    | 132.5591446 | 16.26436021 | 4.04E-08    | 8.150283372 |
| CCT6B     | NM_001193530 | 94.86549455 | 3.056150866 | 4.98E-09    | 31.04084147 |
| BUB3      | NM_004725    | 93.11689181 | 6.210968373 | 1.05E-07    | 14.9923307  |
| U2AF1L4   | NM_001040425 | 76.69875203 | 16.15586122 | 0.000880274 | 4.747425777 |
| BET1L     | NM_016526    | 115.7038541 | 28.63203183 | 9.53E-05    | 4.041063338 |
| CEBPZOS   | NR_037880    | 87.82237075 | 12.00188526 | 1.09E-05    | 7.3173813   |
| CHCHD5    | NM_032309    | 101.9573313 | 18.90726282 | 3.46E-05    | 5.392495584 |

|              |              |             |             |             |             |
|--------------|--------------|-------------|-------------|-------------|-------------|
| ATP5O        | NM_001697    | 93.99119317 | 5.319109789 | 9.62E-08    | 17.67047436 |
| MERTK        | NM_006343    | 66.93529829 | 4.924535011 | 5.52E-05    | 13.59220681 |
| GALNT12      | NM_024642    | 54.98609113 | 2.656750692 | 6.92E-05    | 20.69674482 |
| METAP2       | NM_006838    | 90.8824255  | 4.864217353 | 1.60E-07    | 18.68387428 |
| PANK3        | NM_024594    | 96.22565948 | 2.410310484 | 7.53E-10    | 39.92251626 |
| CSAD         | NM_001244705 | 81.11897176 | 10.219475   | 3.79E-05    | 7.93768484  |
| PPP3CB       | NM_021132    | 148.4914208 | 2.434550078 | 2.32E-14    | 60.99337291 |
| EIF4A3       | NM_014740    | 258.0264523 | 20.1961562  | 4.44E-18    | 12.77601786 |
| INPP4A       | NM_001134224 | 62.51507855 | 5.14704497  | 9.97E-05    | 12.14581938 |
| TMEM106B     | NM_018374    | 69.1697646  | 4.449406069 | 1.56E-05    | 15.54584219 |
| CSPG4        | NM_001897    | 68.29546324 | 14.48867295 | 0.001182116 | 4.713714189 |
| SLC10A3      | NM_001142391 | 113.0322371 | 22.55778146 | 1.81E-05    | 5.010786954 |
| CCDC125      | NM_001297696 | 90.00812411 | 4.522307237 | 1.79E-07    | 19.90314222 |
| ITGA9-AS1    | NR_110531    | 48.76855577 | 4.242466682 | 0.001604539 | 11.49533029 |
| SERTAD4      | NM_019605    | 52.31447414 | 5.014027222 | 0.000394084 | 10.43362388 |
| ZNF620       | NM_001256168 | 56.29754319 | 4.978006013 | 0.000120428 | 11.30925576 |
| PGAP3        | NM_001291733 | 62.95222924 | 11.35177138 | 0.000928702 | 5.545586422 |
| COG7         | NM_153603    | 69.60691528 | 1.697319197 | 2.47E-06    | 41.00991457 |
| EXOC7        | NM_001282313 | 118.375471  | 24.56445638 | 1.37E-05    | 4.818973772 |
| SLC16A1      | NM_003051    | 86.89935644 | 5.11938845  | 6.02E-07    | 16.97455805 |
| ZNF484       | NM_001261459 | 47.45710371 | 4.629360246 | 0.001307564 | 10.25133089 |
| TLE6         | NM_001143986 | 70.04406598 | 8.933771744 | 0.000164509 | 7.840368882 |
| FGFR1OP2     | NM_001171887 | 69.60691528 | 2.259478361 | 1.37E-06    | 30.80663063 |
| NISCH        | NM_007184    | 138.2908163 | 13.59802903 | 3.20E-09    | 10.16991624 |
| ZFYVE1       | NM_021260    | 41.67671904 | 4.187671867 | 0.004482591 | 9.952240853 |
| SGSM2        | NM_014853    | 62.95222924 | 11.31636827 | 0.001155998 | 5.562935716 |
| C18orf8      | NR_075076    | 105.066099  | 4.903849778 | 4.20E-09    | 21.42522788 |
| SERPINI1     | NM_005025    | 47.01995303 | 0.189148254 | 1.06E-05    | 248.5878242 |
| ARSD         | NM_001669    | 81.55612244 | 5.857770377 | 8.02E-07    | 13.92272438 |
| EEF1DP3      | NR_027062    | 38.13080067 | 0.370452776 | 0.000310903 | 102.9302602 |
| SRP68        | NR_048541    | 131.2476924 | 12.56470204 | 8.52E-09    | 10.44574651 |
| SMC2         | NM_001042550 | 48.76855577 | 0.596573758 | 9.32E-06    | 81.74773888 |
| ZFYVE16      | NM_014733    | 103.3174962 | 3.389508595 | 2.01E-09    | 30.48155604 |
| USE1         | NM_018467    | 110.8464837 | 5.478756991 | 1.26E-09    | 20.23204969 |
| NBEAL1       | NM_001114132 | 36.8193486  | 2.001210591 | 0.003834867 | 18.39853774 |
| CTSZ         | NM_001336    | 82.91628738 | 14.22269285 | 0.000170677 | 5.829858543 |
| TMEM9B-AS1   | NR_073431    | 93.55404248 | 6.77158743  | 1.36E-07    | 13.81567372 |
| NEDD8        | NM_006156    | 100.6458792 | 6.720474377 | 5.79E-08    | 14.97600817 |
| KIAA1549     | NM_001164665 | 52.31447414 | 3.807076216 | 0.000200371 | 13.7413782  |
| LOC143666    | NR_026967    | 95.78850885 | 20.4548258  | 0.00036245  | 4.682929584 |
| BUD31        | NM_003910    | 64.31239418 | 12.43588291 | 0.001299615 | 5.17151815  |
| CDC42        | NM_001039802 | 91.75672686 | 4.843411411 | 1.55E-07    | 18.94464853 |
| LAMP2        | NM_013995    | 74.02713503 | 1.236658798 | 1.50E-07    | 59.86059791 |
| FLJ40194     | NR_034161    | 34.14773161 | 1.426119089 | 0.001991569 | 23.94451619 |
| PIGV         | NM_017837    | 131.6848432 | 11.76160222 | 5.98E-09    | 11.19616535 |
| ARMC10       | NM_001161010 | 69.1697646  | 5.864157348 | 1.82E-05    | 11.79534595 |
| NPEPPS       | NM_006310    | 116.5781554 | 4.98600397  | 1.22E-09    | 23.38107954 |
| UVRAG        | NM_003369    | 70.96708023 | 1.713756771 | 2.83E-06    | 41.41024061 |
| SPIN1        | NM_006717    | 148.9285714 | 1.579017586 | 2.24E-14    | 94.3172342  |
| PUM1         | NM_014676    | 109.4863187 | 5.527915815 | 9.10E-09    | 19.80607563 |
| RCOR1        | NM_015156    | 134.3077472 | 5.09738304  | 4.52E-11    | 26.34837252 |
| ANKRD29      | NM_173505    | 52.75162482 | 5.741509384 | 0.000883009 | 9.187762537 |
| HSPB11       | NM_016126    | 107.3005653 | 6.3083235   | 1.53E-08    | 17.00936315 |
| ACADM        | NM_001286043 | 130.3246782 | 4.25171355  | 1.63E-11    | 30.65227153 |
| ZC3H12C      | NM_033390    | 54.98609113 | 2.707245299 | 8.99E-05    | 20.31071627 |
| NPHP3-ACAD11 | NR_037804    | 66.06099693 | 2.231969952 | 8.73E-06    | 29.5976193  |
| SPOPL        | NM_001001664 | 65.62384623 | 3.023711436 | 7.28E-06    | 21.70307836 |
| C8orf37      | NM_177965    | 107.737716  | 7.196530286 | 1.84E-08    | 14.97078616 |
| MRPL44       | NM_022915    | 90.00812411 | 7.50187703  | 1.13E-06    | 11.99808045 |
| LOC100507283 | NR_103862    | 143.6340504 | 2.911374967 | 2.94E-13    | 49.33546931 |
| CCNH         | NM_001199189 | 74.02713503 | 4.146022646 | 2.81E-06    | 17.85497605 |
| EGFR         | NM_201284    | 130.7618289 | 4.502312683 | 8.05E-11    | 29.04325802 |

|              |              |             |             |             |             |
|--------------|--------------|-------------|-------------|-------------|-------------|
| SECISBP2     | NM_024077    | 149.8515857 | 3.127933783 | 1.67E-13    | 47.90753132 |
| POLE         | NM_006231    | 61.2036265  | 9.180211434 | 0.000646643 | 6.666908158 |
| CALM2        | NM_001743    | 116.1410048 | 9.376333896 | 1.18E-08    | 12.38661145 |
| TBC1D7       | NM_001258457 | 76.26160134 | 3.710527751 | 1.69E-06    | 20.55276405 |
| RPIA         | NM_144563    | 83.79058876 | 3.275956757 | 1.48E-07    | 25.57744041 |
| SRC          | NM_198291    | 127.2159105 | 12.44423609 | 2.08E-08    | 10.22287825 |
| COA4         | NM_016565    | 101.5201806 | 12.19501183 | 1.50E-06    | 8.324729977 |
| REEP3        | NM_001001330 | 155.5832575 | 3.588736789 | 4.20E-14    | 43.3532094  |
| NECAP2       | NM_001145278 | 115.7038541 | 8.688664088 | 2.47E-08    | 13.31664488 |
| ARFGEF1      | NM_006421    | 112.9213894 | 3.562717346 | 4.69E-11    | 34.22146008 |
| SRRT         | NM_015908    | 94.86549455 | 18.7121594  | 7.30E-05    | 5.069724585 |
| ZFC3H1       | NM_144982    | 70.04406598 | 4.828678842 | 1.35E-05    | 14.50584482 |
| REEP4        | NM_025232    | 118.375471  | 22.33883551 | 1.36E-05    | 5.299088708 |
| KIAA0319L    | NM_024874    | 119.2497724 | 3.676468797 | 7.99E-11    | 32.4359539  |
| KIAA1033     | NM_001293640 | 95.78850885 | 4.047515929 | 5.45E-08    | 23.66599923 |
| LOC642366    | NR_046243    | 69.60691528 | 1.466483851 | 8.08E-08    | 47.4651768  |
| SRPK1        | NM_003137    | 111.7207851 | 5.665127526 | 4.20E-09    | 19.72078908 |
| RIOK1        | NM_031480    | 96.66281017 | 3.858607903 | 2.15E-08    | 25.05121344 |
| TACC1        | NM_006283    | 172.0013972 | 4.308950206 | 6.22E-15    | 39.91723946 |
| ZNF778       | NM_182531    | 102.4431948 | 7.558883227 | 1.10E-07    | 13.55268917 |
| KCTD13       | NM_178863    | 70.96708023 | 11.96130723 | 0.000587141 | 5.933053877 |
| GTF2IRD2     | NM_001281447 | 143.1968996 | 5.579278485 | 3.13E-12    | 25.6658455  |
| MED26        | NM_004831    | 90.4452748  | 18.43756255 | 0.000179792 | 4.905489788 |
| NR1D2        | NM_001145425 | 69.60691528 | 1.814157264 | 1.34E-06    | 38.36873279 |
| SYN2         | NM_133625    | 83.79058876 | 4.343342046 | 1.77E-06    | 19.29173155 |
| AKIRIN1      | NM_001136275 | 197.6971272 | 10.16248756 | 8.90E-16    | 19.45361566 |
| EML1         | NM_001008707 | 62.51507855 | 3.80377368  | 1.76E-05    | 16.43501528 |
| NINL         | NM_025176    | 107.737716  | 3.613879656 | 9.55E-10    | 29.81220358 |
| FAM84B       | NM_174911    | 77.62176628 | 11.78918587 | 8.23E-05    | 6.584149843 |
| COMMD10      | NM_016144    | 155.6319704 | 1.799796585 | 4.22E-14    | 86.47197784 |
| SYNM         | NM_145728    | 100.6458792 | 5.851448411 | 2.15E-08    | 17.20016518 |
| LONP2        | NM_001300948 | 48.33140508 | 1.676376657 | 0.000302354 | 28.83087455 |
| METTL5       | NM_001293187 | 160.0521901 | 7.598596225 | 2.26E-13    | 21.06338925 |
| SLC39A11     | NM_001159770 | 78.93321834 | 7.639567776 | 1.66E-05    | 10.33215761 |
| MORN2        | NM_001145450 | 46.58280234 | 1.851264062 | 5.90E-05    | 25.16270006 |
| VPS39        | NM_001301138 | 78.93321834 | 3.830763407 | 1.82E-06    | 20.60508832 |
| TFG          | NM_001195478 | 110.8464837 | 3.289878311 | 1.21E-10    | 33.69318656 |
| TRRAP        | NM_001244580 | 53.23748838 | 5.214179658 | 0.000543404 | 10.21013695 |
| IQSEC2       | NM_001111125 | 83.35343807 | 4.502316691 | 1.45E-06    | 18.51345514 |
| GTF2E2       | NM_002095    | 79.8075197  | 2.03743446  | 2.45E-07    | 39.17059482 |
| NPHP1        | NM_001128179 | 42.11386972 | 2.69433221  | 0.001079932 | 15.63054087 |
| ATG16L2      | NM_033388    | 132.1219938 | 24.20730936 | 9.12E-07    | 5.457938007 |
| AHSA1        | NM_012111    | 142.3225982 | 8.952217563 | 7.05E-11    | 15.89802719 |
| GPHN         | NM_020806    | 65.62384623 | 2.320564434 | 1.08E-05    | 28.27926053 |
| ZBTB44       | NM_014155    | 105.9404003 | 1.099378011 | 2.76E-10    | 96.36394336 |
| CTC-436P18.1 | NR_109908    | 82.91628738 | 3.774033394 | 1.80E-07    | 21.97020501 |
| RRP7A        | NM_015703    | 96.66281017 | 23.88169438 | 0.0002823   | 4.047569182 |
| SQSTM1       | NM_003900    | 108.6607303 | 24.70495147 | 5.19E-05    | 4.398338139 |
| BRD9         | NM_023924    | 126.7787599 | 8.9992907   | 3.86E-09    | 14.08763914 |
| C3orf62      | NM_198562    | 48.76855577 | 6.138983285 | 0.002686586 | 7.944076975 |
| VCP          | NM_007126    | 82.4791367  | 15.5869112  | 0.000211696 | 5.291563906 |
| RUVBL2       | NM_006666    | 73.15283366 | 13.22931907 | 0.000374971 | 5.529599316 |
| FAM89A       | NM_198552    | 109.4863187 | 3.86419766  | 8.05E-10    | 28.33351923 |
| LOC100131564 | NR_034089    | 138.3395291 | 2.437695675 | 8.10E-14    | 56.7501229  |
| GATAD1       | NM_021167    | 141.8367347 | 4.407989538 | 2.48E-13    | 32.17719405 |
| SMEK1        | NM_001284280 | 97.97426223 | 5.658234462 | 6.25E-08    | 17.31534154 |
| METTL1       | NM_005371    | 100.2087285 | 13.43726709 | 7.57E-06    | 7.457523009 |
| RARS2        | NM_020320    | 89.13382275 | 2.6271884   | 4.16E-08    | 33.92745748 |
| BAIAP2-AS1   | NR_026857    | 62.95222924 | 14.83981131 | 0.00408435  | 4.242117904 |
| RAB2B        | NM_032846    | 42.11386972 | 2.817993534 | 0.000621252 | 14.94462965 |
| UBA5         | NM_024818    | 133.4334458 | 1.994052124 | 4.81E-14    | 66.91572613 |
| PEX3         | NM_003630    | 73.15283366 | 2.14425497  | 4.92E-07    | 34.11573468 |

|              |              |             |             |             |             |
|--------------|--------------|-------------|-------------|-------------|-------------|
| ENPP1        | NM_006208    | 87.33650713 | 0.164900746 | 7.10E-12    | 529.6307585 |
| RAD51AP2     | NM_001099218 | 34.58488231 | 2.37834896  | 0.002492786 | 14.54155084 |
| FAM120C      | NM_017848    | 87.77365781 | 1.190567382 | 2.88E-08    | 73.72422523 |
| TSEN2        | NM_001145395 | 71.40423091 | 5.540980078 | 1.34E-05    | 12.88657059 |
| CMTR1        | NM_015050    | 87.33650713 | 5.780345872 | 3.70E-07    | 15.10921821 |
| LYAR         | NM_001145725 | 105.066099  | 5.604780221 | 2.15E-08    | 18.74580177 |
| LOC101928222 | NR_110235    | 66.49814761 | 5.669024484 | 2.22E-05    | 11.73008651 |
| ZXDC         | NR_104249    | 130.7618289 | 8.066802459 | 2.74E-10    | 16.20987121 |
| FAM72B       | NM_001100910 | 43.47403467 | 0.941652799 | 0.000190692 | 46.16779636 |
| SEMA6A       | NM_001300780 | 34.58488231 | 0.296965665 | 0.000627232 | 116.4608789 |
| SMEK2        | NM_001122964 | 36.8193486  | 3.027563075 | 0.003593783 | 12.16138118 |
| C10orf82     | NM_144661    | 40.80241766 | 3.961507785 | 0.003162159 | 10.29971917 |
| TTF1         | NM_007344    | 73.15283366 | 5.991355736 | 6.22E-06    | 12.20972963 |
| PLAGL2       | NM_002657    | 155.5832575 | 7.157143923 | 1.16E-12    | 21.73817645 |
| CCDC22       | NM_014008    | 63.38937993 | 4.458762032 | 3.55E-05    | 14.21681164 |
| CMBL         | NM_138809    | 59.84346156 | 2.945845398 | 1.57E-05    | 20.31452893 |
| CTBP1-AS2    | NR_033339    | 106.8634146 | 21.67931404 | 4.07E-05    | 4.929280255 |
| NPLOC4       | NM_017921    | 246.9028337 | 14.01526476 | 2.87E-18    | 17.61670849 |
| NDOR1        | NM_001144026 | 150.2887363 | 28.15184725 | 2.06E-07    | 5.338503544 |
| ARPC1A       | NM_006409    | 90.8824255  | 6.762040322 | 1.03E-06    | 13.44008926 |
| ENTPD7       | NM_020354    | 113.9552513 | 5.453471347 | 1.51E-09    | 20.8959109  |
| PPP2R5D      | NM_001270476 | 73.15283366 | 11.71733066 | 0.000128831 | 6.24313129  |
| ZNF212       | NM_012256    | 78.05891695 | 8.535303991 | 4.78E-05    | 9.145417321 |
| UQCRC1       | NM_003365    | 143.6340504 | 18.58372212 | 1.76E-08    | 7.729024863 |
| KIF5A        | NM_004984    | 68.73261391 | 7.475526733 | 0.000103779 | 9.194350629 |
| SOAT1        | NM_003101    | 43.91118534 | 2.033920325 | 0.000959782 | 21.58943239 |
| SCRN3        | NM_001193528 | 44.34833603 | 2.955675478 | 0.000459537 | 15.00446729 |
| LRBA         | NM_006726    | 113.0322371 | 2.596705722 | 4.54E-10    | 43.52909    |
| MINPP1       | NM_004897    | 46.14565165 | 3.757065689 | 0.000561193 | 12.28236487 |
| ECSIT        | NM_001142464 | 71.8413816  | 10.72455665 | 0.000202053 | 6.698774032 |
| LRRC42       | NM_052940    | 98.41141291 | 8.436636014 | 2.28E-07    | 11.66476932 |
| HMGN1        | NM_004965    | 127.2159105 | 7.823765892 | 2.54E-10    | 16.2601888  |
| PFAS         | NM_012393    | 60.76647581 | 9.262696337 | 0.001597388 | 6.560344159 |
| BAG3         | NM_004281    | 96.66281017 | 15.53162364 | 1.94E-05    | 6.223612701 |
| EXOC3        | NM_007277    | 79.8075197  | 9.820956981 | 3.79E-05    | 8.126246745 |
| CTTNBP2      | NM_033427    | 58.5320095  | 1.295772432 | 5.22E-06    | 45.17151935 |
| ENO4         | NM_001242699 | 68.29546324 | 8.948309303 | 0.000108294 | 7.632219778 |
| CBY1         | NM_015373    | 90.4452748  | 6.874112917 | 4.84E-07    | 13.15737403 |
| GMPPA        | NM_013335    | 92.67974111 | 13.95734594 | 2.28E-05    | 6.640212364 |
| ZNF274       | NM_016324    | 42.11386972 | 1.573698    | 0.000605112 | 26.7610874  |
| GLTP         | NM_016433    | 66.93529829 | 9.983828168 | 0.000622081 | 6.704372027 |
| VPS13A       | NM_001018038 | 55.86039251 | 2.018529907 | 5.69E-05    | 27.67379979 |
| MMS22L       | NM_198468    | 58.5320095  | 2.151824413 | 5.34E-05    | 27.20110858 |
| CHD1L        | NM_001256338 | 117.9383204 | 2.066005351 | 2.18E-11    | 57.08519599 |
| SMCHD1       | NM_015295    | 116.1410048 | 3.31254478  | 1.55E-10    | 35.06096143 |
| KLF4         | NM_004235    | 119.2497724 | 9.539630424 | 5.69E-09    | 12.50046041 |
| BCAT2        | NM_001190    | 104.1917976 | 20.10217703 | 4.82E-05    | 5.183110138 |
| PSMD11       | NM_002815    | 139.6509813 | 4.564710873 | 2.59E-12    | 30.59360936 |
| TBC1D22B     | NM_017772    | 116.1410048 | 3.963974131 | 8.71E-10    | 29.29913287 |
| MEF2D        | NM_005920    | 78.01020409 | 13.36825179 | 0.000258667 | 5.835482852 |
| SLC35E2      | NM_182838    | 116.6268684 | 16.2881091  | 3.87E-07    | 7.160246019 |
| BACH2        | NM_001170794 | 41.67671904 | 2.78003984  | 0.001249235 | 14.99141071 |
| RAB11FIP2    | NM_014904    | 84.22773945 | 2.932219059 | 9.63E-08    | 28.72491371 |
| GAK          | NM_005255    | 106.4262639 | 9.880311552 | 4.19E-07    | 10.77154939 |
| GATA6        | NM_005257    | 51.44017277 | 1.661129011 | 8.22E-05    | 30.96699439 |
| NDUFA10      | NM_004544    | 109.049168  | 7.015075691 | 4.28E-08    | 15.54497383 |
| SP100        | NM_001080391 | 62.51507855 | 2.409360738 | 1.55E-05    | 25.9467491  |
| USP4         | NM_001251877 | 107.3005653 | 5.458130723 | 2.60E-09    | 19.65884855 |
| RWDD1        | NM_015952    | 42.59973328 | 2.523772937 | 0.000658396 | 16.8793843  |
| TRA2A        | NM_001282758 | 103.3174962 | 7.68987743  | 7.69E-08    | 13.43551924 |
| RAP1GDS1     | NM_001100429 | 81.55612244 | 2.479949292 | 2.32E-07    | 32.88620566 |
| KLHL29       | NM_052920    | 80.68182108 | 4.628883247 | 3.42E-06    | 17.43008341 |

|            |              |             |             |             |             |
|------------|--------------|-------------|-------------|-------------|-------------|
| TBC1D8     | NM_001102426 | 155.5832575 | 7.593641202 | 6.76E-12    | 20.48862376 |
| THNSL2     | NM_018271    | 35.02203299 | 1.413172916 | 0.002603013 | 24.78255321 |
| ZFAS1      | NR_036659    | 138.7766799 | 31.86786166 | 3.28E-06    | 4.354753431 |
| MAPK1IP1L  | NM_144578    | 196.3856752 | 6.101789191 | 4.02E-18    | 32.18493282 |
| GTF2IRD1P1 | NR_003934    | 80.29338327 | 7.705239916 | 1.05E-05    | 10.42062079 |
| PDZK1P2    | NR_111936    | 53.67463907 | 10.92036823 | 0.004614706 | 4.915094246 |
| RIMKLA     | NM_173642    | 102.394482  | 7.395718101 | 1.09E-07    | 13.84510342 |
| SLC38A10   | NM_001037984 | 174.2358636 | 20.56323122 | 2.65E-10    | 8.473175336 |
| LYRM1      | NM_001128301 | 55.90910538 | 7.867804726 | 0.000888979 | 7.106061644 |
| TLK2       | NM_006852    | 94.42834386 | 5.097452747 | 1.66E-07    | 18.52461387 |
| LARP6      | NM_197958    | 58.96916018 | 6.390534321 | 0.00016     | 9.227578982 |
| SNX19      | NM_014758    | 99.28571429 | 2.621724301 | 1.33E-09    | 37.87038716 |
| ZNF511     | NM_145806    | 83.79058876 | 7.886123193 | 6.09E-06    | 10.62506719 |
| ARID4A     | NM_023001    | 35.94504724 | 1.901886337 | 0.003369523 | 18.89968214 |
| TTC17      | NM_018259    | 82.91628738 | 2.383356792 | 2.02E-07    | 34.78970822 |
| MYBL1      | NM_001080416 | 160.0521901 | 3.834288165 | 3.75E-14    | 41.74234778 |
| RBM25      | NM_021239    | 151.6001885 | 4.392244086 | 4.70E-13    | 34.5154289  |
| BBS2       | NM_031885    | 78.93321834 | 3.771073216 | 1.39E-06    | 20.93123464 |
| CHMP4C     | NM_152284    | 130.8105418 | 2.313257956 | 1.12E-13    | 56.54818628 |
| PPP2R2A    | NM_002717    | 117.0153061 | 3.06930948  | 8.48E-11    | 38.12431001 |
| MSMO1      | NM_001017369 | 61.64077717 | 4.823101809 | 3.92E-05    | 12.78031848 |
| CEP164     | NM_014956    | 122.3585401 | 5.752296961 | 3.86E-10    | 21.27124884 |
| GLIDR      | NR_015363    | 40.36526697 | 4.119738409 | 0.004578793 | 9.798017001 |
| C14orf37   | NM_001001872 | 37.69364998 | 1.360929941 | 0.003567156 | 27.69698046 |
| DRAM2      | NM_178454    | 53.67463907 | 2.39618155  | 4.08E-05    | 22.40007193 |
| RAB11A     | NM_004663    | 74.95014928 | 6.070306729 | 4.98E-06    | 12.34701188 |
| TRIM68     | NM_018073    | 83.35343807 | 7.474495332 | 6.97E-06    | 11.15171451 |
| TM9SF4     | NM_014742    | 85.58790438 | 7.996616566 | 4.14E-06    | 10.70301467 |
| FNBP1L     | NM_017737    | 36.38219793 | 3.522199179 | 0.003811397 | 10.32939822 |
| SLC35B4    | NM_032826    | 36.8193486  | 0.096108062 | 1.24E-05    | 383.1036427 |
| STRN4      | NM_013403    | 161.8007928 | 20.27214448 | 1.35E-09    | 7.981434477 |
| PPAP2B     | NM_003713    | 37.2564993  | 1.822478243 | 0.00341698  | 20.44276767 |
| SEC24A     | NM_001252231 | 82.91628738 | 1.530857094 | 4.28E-08    | 54.16331001 |
| PTPN14     | NM_005401    | 101.5201806 | 2.172443618 | 3.09E-09    | 46.73087014 |
| WDR24      | NM_032259    | 128.5760755 | 23.39138079 | 1.24E-06    | 5.49672876  |
| SETD7      | NM_030648    | 70.96708023 | 4.421644608 | 1.25E-05    | 16.04992859 |
| ZSCAN9     | NM_006299    | 78.05891695 | 10.69771988 | 0.00010443  | 7.296780796 |
| PAN3       | NM_175854    | 41.67671904 | 0.969076471 | 0.000134658 | 43.00663599 |
| ABCC6P2    | NR_023387    | 30.16466256 | 0.345283748 | 0.001592987 | 87.36195289 |
| ZNF197     | NM_006991    | 186.1850708 | 3.655004179 | 7.45E-19    | 50.93976961 |
| TEX9       | NM_001286449 | 60.32932513 | 1.555218358 | 1.98E-05    | 38.79154642 |
| LMAN2L     | NR_024519    | 44.34833603 | 5.777571556 | 0.00248077  | 7.675947515 |
| TFCP2      | NM_005653    | 61.64077717 | 3.80388316  | 1.53E-05    | 16.20469782 |
| IMMP1L     | NM_144981    | 47.01995303 | 2.492061952 | 0.000567887 | 18.8678909  |
| MED14      | NM_004229    | 51.87732345 | 1.816781173 | 0.000152884 | 28.55452502 |
| IRF5       | NM_001242452 | 114.8295527 | 13.34163942 | 3.48E-07    | 8.606854757 |
| PVRL3      | NM_015480    | 73.58998434 | 2.3287513   | 8.64E-07    | 31.60061975 |
| SERINC1    | NM_020755    | 73.15283366 | 2.35225407  | 3.50E-07    | 31.09903585 |
| CHMP4B     | NM_176812    | 94.42834386 | 8.582268116 | 6.80E-07    | 11.00272592 |
| MTMR1      | NM_003828    | 74.46428571 | 2.609725096 | 9.86E-07    | 28.533383   |
| UBE2T      | NM_014176    | 103.754647  | 6.357797003 | 1.19E-08    | 16.31927646 |
| PHF10      | NM_133325    | 52.75162482 | 4.789412264 | 0.00059884  | 11.01421676 |
| GLTSCR1    | NM_015711    | 58.96916018 | 9.662437645 | 0.000674189 | 6.102927889 |
| C5orf56    | NR_045116    | 57.65770813 | 8.713959208 | 0.001101591 | 6.616706224 |
| GNAI3      | NM_006496    | 82.91628738 | 3.300858703 | 1.23E-07    | 25.11961124 |
| ZNF799     | NM_001080821 | 48.33140508 | 1.652080326 | 4.78E-05    | 29.254876   |
| SMIM20     | NM_001145432 | 97.97426223 | 2.645180071 | 2.63E-09    | 37.03878737 |
| FBXW7      | NM_001257069 | 54.54894044 | 2.303641634 | 9.74E-05    | 23.67943852 |
| LOC414300  | NR_121211    | 50.5658714  | 3.016252299 | 8.99E-05    | 16.76447007 |
| GSDMA      | NM_178171    | 51.87732345 | 8.804973765 | 0.002388823 | 5.891820332 |
| RBBP4      | NM_001135255 | 107.737716  | 7.169600251 | 2.73E-08    | 15.02701855 |
| MECP2      | NM_001110792 | 105.5032497 | 3.988317868 | 9.21E-09    | 26.45306947 |

|              |              |             |             |             |             |
|--------------|--------------|-------------|-------------|-------------|-------------|
| TERF2IP      | NM_018975    | 65.62384623 | 3.736093545 | 7.66E-06    | 17.56482953 |
| NDUFB6       | NM_182739    | 52.31447414 | 4.236692679 | 0.000553957 | 12.34795113 |
| LOC100506639 | NR_102752    | 57.65770813 | 2.926554122 | 2.77E-05    | 19.70156905 |
| SNX16        | NM_152836    | 44.34833603 | 3.069644938 | 0.00050958  | 14.44738298 |
| GGNBP2       | NM_024835    | 155.1461068 | 7.205342375 | 2.33E-12    | 21.53209364 |
| LIN7B        | NM_022165    | 109.4863187 | 24.36710799 | 8.43E-05    | 4.493201194 |
| BCL2L2       | NM_001199839 | 80.2446704  | 14.49841172 | 0.000357208 | 5.534721456 |
| PIP5K1C      | NM_001300849 | 80.68182108 | 15.07560624 | 0.000173864 | 5.351812708 |
| ATP6V1A      | NM_001690    | 47.45710371 | 3.547365661 | 0.000319058 | 13.3781257  |
| ITPR3        | NM_002224    | 119.6869232 | 13.45544318 | 1.17E-07    | 8.895056192 |
| BRD8         | NM_006696    | 76.69875203 | 4.892652509 | 2.09E-06    | 15.67631298 |
| ANKRD33B     | NM_001164440 | 47.8942544  | 4.951524326 | 0.001605874 | 9.672628315 |
| WASH2P       | NR_024077    | 70.09277885 | 6.82613974  | 3.45E-05    | 10.26828948 |
| DCTN3        | NM_001281426 | 101.0830299 | 12.15381745 | 2.57E-06    | 8.316977801 |
| HINT1        | NM_005340    | 86.89935644 | 17.54070946 | 0.000181207 | 4.95415289  |
| NAP1L4       | NM_005969    | 104.6289483 | 8.439012654 | 6.99E-08    | 12.39824522 |
| E2F4         | NM_001950    | 142.759749  | 22.51262947 | 1.00E-07    | 6.341318287 |
| PHB          | NM_001281496 | 68.29546324 | 8.696351608 | 0.000204376 | 7.853346589 |
| VAPA         | NM_194434    | 111.7207851 | 3.505537798 | 1.45E-09    | 31.86979902 |
| WAPAL        | NM_015045    | 82.91628738 | 4.375504806 | 1.43E-06    | 18.95010772 |
| NAPEPLD      | NM_198990    | 51.00302207 | 5.363137389 | 0.000838217 | 9.509922713 |
| LOC100507501 | NR_039999    | 75.82445064 | 11.56847208 | 0.000109212 | 6.554404946 |
| POLR2D       | NM_004805    | 114.392402  | 10.50373111 | 6.51E-08    | 10.89064455 |
| NDFIP2       | NM_001161407 | 43.91118534 | 2.824168922 | 0.001072742 | 15.54835654 |
| NPTXR        | NM_014293    | 117.0153061 | 13.61984507 | 1.20E-07    | 8.591529901 |
| HERC1        | NM_003922    | 37.69364998 | 3.107422396 | 0.003953791 | 12.13019834 |
| ZNF335       | NM_022095    | 65.62384623 | 14.73338419 | 0.001783637 | 4.454091835 |
| SLC4A3       | NM_201574    | 93.55404248 | 23.30621653 | 0.000489275 | 4.014123972 |
| PCYT1A       | NM_005017    | 98.41141291 | 4.216767234 | 4.68E-08    | 23.33811838 |
| RP9P         | NR_003500    | 115.2667034 | 4.292888213 | 4.05E-10    | 26.85061843 |
| PARG         | NM_003631    | 58.09485881 | 0.815777897 | 5.74E-06    | 71.2140633  |
| TMEM214      | NM_001083590 | 115.7038541 | 12.96656328 | 2.04E-07    | 8.923247555 |
| VCPKMT       | NM_024558    | 55.86039251 | 6.011669181 | 0.000384202 | 9.291993758 |
| DLG1         | NM_004087    | 82.91628738 | 3.783449528 | 2.79E-07    | 21.91552623 |
| RBM18        | NR_027125    | 51.44017277 | 2.182207007 | 8.35E-05    | 23.57254496 |
| ZNF333       | NM_032433    | 83.35343807 | 7.061126586 | 5.26E-06    | 11.8045523  |
| PSAP         | NM_002778    | 176.421617  | 10.14720932 | 1.37E-13    | 17.38622034 |
| NF1          | NM_000267    | 84.66489013 | 3.530325912 | 1.55E-07    | 23.98217395 |
| SEPSECS-AS1  | NR_037934    | 39.9281163  | 3.512326082 | 0.001796512 | 11.36799812 |
| HNRNPF       | NM_001098207 | 82.91628738 | 14.0512912  | 0.000166871 | 5.900972814 |
| ACER2        | NM_001010887 | 80.68182108 | 1.85868266  | 1.13E-07    | 43.40806681 |
| NEDD9        | NM_182966    | 27.05589488 | 0.683102942 | 0.004451956 | 39.60734646 |
| SAMD13       | NM_001010971 | 47.01995303 | 4.798178968 | 0.002589383 | 9.799541314 |
| CCNE1        | NM_001238    | 74.46428571 | 6.147258229 | 1.31E-05    | 12.1134143  |
| RPP38        | NM_006414    | 136.1050629 | 11.49461219 | 5.59E-10    | 11.84077032 |
| LIPE-AS1     | NR_073180    | 75.82445064 | 6.363956154 | 6.14E-06    | 11.91467207 |
| NDUFA4       | NM_002489    | 74.51299858 | 7.387206154 | 3.87E-05    | 10.08676312 |
| UGDH         | NM_001184701 | 82.4791367  | 4.550217668 | 7.13E-07    | 18.12641564 |
| TVP23C-CDRT4 | NM_001204478 | 73.15283366 | 3.460945168 | 1.45E-06    | 21.13666357 |
| LOC100996579 | NR_110164    | 40.80241766 | 3.886840102 | 0.002179176 | 10.4975807  |
| SUV420H2     | NM_032701    | 130.3246782 | 26.3827274  | 3.81E-06    | 4.939772761 |
| ASUN         | NM_018164    | 73.15283366 | 2.206839453 | 3.97E-07    | 33.14823538 |
| MRPS36       | NM_033281    | 69.1697646  | 3.492335576 | 4.93E-06    | 19.80616212 |
| ZNF764       | NM_033410    | 97.09996085 | 19.56098949 | 0.000106881 | 4.963959564 |
| COMMD4       | NR_104313    | 79.37036901 | 18.30785043 | 0.000947536 | 4.335318846 |
| LOC101926911 | NR_110104    | 54.98609113 | 3.951862142 | 0.000125068 | 13.91396996 |
| ILF3-AS1     | NR_024333    | 137.8536657 | 15.81796168 | 5.54E-08    | 8.715008195 |
| CDC42EP1     | NM_152243    | 97.53711154 | 18.15034089 | 3.14E-05    | 5.37384461  |
| POLR1C       | NM_203290    | 97.09996085 | 20.30827691 | 0.000110151 | 4.781299827 |
| KLHDC1       | NM_172193    | 65.18669554 | 0.956717936 | 2.27E-07    | 68.13575149 |
| TPP1         | NM_000391    | 64.74954487 | 10.72971468 | 0.000869165 | 6.034600809 |
| RAB18        | NM_001256412 | 54.11178977 | 3.912757707 | 0.000396571 | 13.82957848 |

|                |              |             |             |             |             |
|----------------|--------------|-------------|-------------|-------------|-------------|
| TUBGCP4        | NM_014444    | 110.8464837 | 6.179907458 | 1.33E-08    | 17.93659281 |
| EDC4           | NM_014329    | 107.737716  | 16.80357263 | 4.21E-06    | 6.411595818 |
| FAM57A         | NM_024792    | 78.01020409 | 12.08809535 | 0.000141116 | 6.45347359  |
| PSME3          | NM_005789    | 129.0132262 | 19.78402417 | 3.03E-07    | 6.521081104 |
| SNRNP40        | NM_004814    | 197.6971272 | 4.977121829 | 3.72E-18    | 39.721175   |
| ABCG2          | NM_004827    | 41.67671904 | 1.778701603 | 0.000935157 | 23.43097851 |
| PMAIP1         | NM_021127    | 130.3246782 | 20.71972187 | 3.14E-07    | 6.289885501 |
| SNAPC1         | NM_003082    | 58.09485881 | 1.309964979 | 1.58E-05    | 44.34840607 |
| HSPD1          | NM_002156    | 144.071201  | 14.84461522 | 1.35E-09    | 9.70528362  |
| ZNF816-ZNF321P | NM_001202473 | 51.87732345 | 2.03533538  | 0.000102555 | 25.48834161 |
| OMA1           | NM_145243    | 83.79058876 | 0.759408606 | 1.83E-09    | 110.3366332 |
| C10orf32       | NM_001136200 | 127.7017741 | 2.529670766 | 6.28E-14    | 50.48157881 |
| DCK            | NM_000788    | 66.06099693 | 1.544925245 | 2.47E-06    | 42.75999575 |
| PTGES2-AS1     | NR_024425    | 59.40631088 | 9.390632022 | 0.001595461 | 6.326124881 |
| HMGCL          | NM_000191    | 144.071201  | 9.375368956 | 8.26E-11    | 15.36699    |
| RAB2A          | NM_001242644 | 70.48121666 | 2.822530775 | 2.37E-06    | 24.97092939 |
| RALBP1         | NM_006788    | 109.4863187 | 4.263141762 | 4.92E-09    | 25.68207318 |
| AVL9           | NM_015060    | 90.4452748  | 1.945003812 | 1.92E-08    | 46.50133549 |
| TAF4B          | NM_001293725 | 37.2564993  | 0.658796389 | 0.000475706 | 56.55237329 |
| VPS33B         | NM_001289149 | 72.71568297 | 6.40575674  | 4.59E-05    | 11.35161479 |
| STK17A         | NM_004760    | 179.9675353 | 5.139083107 | 4.84E-16    | 35.01938606 |
| NABP1          | NM_001254736 | 101.5201806 | 7.599406228 | 8.67E-08    | 13.35896221 |
| LUC7L          | NM_018032    | 116.1410048 | 3.347008251 | 2.95E-10    | 34.69994575 |
| TRPC4AP        | NM_015638    | 125.4673077 | 5.20671558  | 2.08E-10    | 24.09720789 |
| GSS            | NM_000178    | 97.09996085 | 8.348234594 | 2.76E-07    | 11.63119696 |
| DZIP3          | NM_014648    | 62.07792787 | 2.602720407 | 1.49E-05    | 23.85117038 |
| FXYP7          | NM_022006    | 63.82653061 | 11.22283701 | 0.002121622 | 5.687201068 |
| STX17-AS1      | NR_038853    | 34.58488231 | 2.685100123 | 0.004776248 | 12.88029523 |
| TEF            | NM_003216    | 52.31447414 | 8.829176209 | 0.002517043 | 5.925181795 |
| PIGU           | NM_080476    | 74.02713503 | 5.530789699 | 9.64E-06    | 13.38455068 |
| KIAA0020       | NM_014878    | 69.60691528 | 2.771631101 | 2.48E-06    | 25.11406199 |
| COPB1          | NM_001144062 | 92.67974111 | 1.883399352 | 6.49E-09    | 49.20875703 |
| MOCOS          | NM_017947    | 130.3246782 | 1.706151033 | 1.19E-12    | 76.38519431 |
| UBA1           | NM_003334    | 106.377551  | 10.07723749 | 1.97E-07    | 10.5562215  |
| NCDN           | NM_014284    | 114.8295527 | 16.99126719 | 1.06E-06    | 6.758151198 |
| NDST2          | NM_003635    | 135.6679122 | 11.91668039 | 2.98E-09    | 11.3847068  |
| YIPF6          | NM_001195214 | 109.4863187 | 2.250487175 | 1.07E-10    | 48.65005228 |
| OPA3           | NM_001017989 | 101.9573313 | 9.588473597 | 6.37E-07    | 10.63332242 |
| TMEM38A        | NM_024074    | 95.30264523 | 8.203420315 | 5.04E-07    | 11.61742804 |
| RBM43          | NM_198557    | 32.83627956 | 0.883136661 | 0.003792231 | 37.18142503 |
| SLC35F3        | NM_173508    | 54.54894044 | 2.808975685 | 0.000116393 | 19.41951322 |
| TRAF3IP1       | NM_001139490 | 83.79058876 | 3.838750003 | 1.96E-07    | 21.82757113 |
| DIP2A          | NM_001146116 | 88.2108085  | 4.875928182 | 4.99E-07    | 18.09108035 |
| FLJ38576       | NR_046264    | 78.93321834 | 5.569927749 | 4.46E-06    | 14.17131818 |
| DUS2           | NM_001271763 | 93.55404248 | 6.96187025  | 6.99E-07    | 13.43806177 |
| NIPSNAP3A      | NM_015469    | 48.76855577 | 3.452354205 | 0.00066158  | 14.12617387 |
| NOP9           | NM_174913    | 93.11689181 | 17.97503046 | 5.47E-05    | 5.180346816 |
| ECI1           | NM_001178029 | 121.4842387 | 15.95086468 | 2.55E-07    | 7.616153805 |
| NCK1           | NM_006153    | 65.18669554 | 3.266995069 | 8.17E-06    | 19.95310497 |
| PTDSS1         | NM_014754    | 195.0742231 | 3.661533451 | 2.65E-17    | 53.27664645 |
| DGCR2          | NR_033674    | 83.35343807 | 7.290110359 | 7.97E-06    | 11.43376903 |
| ERRFI1         | NM_018948    | 127.7017741 | 8.043284368 | 5.47E-10    | 15.8768195  |
| BUB1           | NM_004336    | 51.44017277 | 4.319717505 | 0.000755518 | 11.90822611 |
| DNAJC27        | NM_016544    | 43.47403467 | 2.07040529  | 0.000677782 | 20.99783791 |
| GOLPH3         | NM_022130    | 75.38729997 | 2.434633665 | 7.07E-07    | 30.96453526 |
| RBM34          | NM_015014    | 99.7715779  | 3.924697886 | 1.26E-08    | 25.42146703 |
| GTF2H5         | NM_207118    | 132.5591446 | 4.516567104 | 1.12E-11    | 29.34953506 |
| KANK1          | NM_001256877 | 52.31447414 | 0.812703623 | 1.93E-05    | 64.37091289 |
| DNAJC16        | NM_015291    | 63.43809281 | 6.959723527 | 0.000337311 | 9.115030585 |
| ZBTB34         | NM_001099270 | 106.377551  | 7.005330168 | 3.46E-08    | 15.18523017 |
| CCRN4L         | NM_012118    | 93.11689181 | 5.170349154 | 6.56E-08    | 18.00978793 |
| FZD3           | NM_017412    | 94.86549455 | 2.44822225  | 1.14E-08    | 38.74872658 |

|            |              |             |             |             |             |
|------------|--------------|-------------|-------------|-------------|-------------|
| PGD        | NM_002631    | 54.11178977 | 6.480801002 | 0.001394277 | 8.34955274  |
| ALDH18A1   | NM_001017423 | 51.00302207 | 3.539349442 | 0.000160205 | 14.41028158 |
| DGUOK      | NM_080918    | 92.67974111 | 5.128405219 | 1.32E-07    | 18.07184439 |
| PABPC1     | NM_002568    | 113.9552513 | 21.27586791 | 7.36E-06    | 5.356080035 |
| GAS6       | NM_000820    | 70.48121666 | 16.37921339 | 0.001890505 | 4.303089226 |
| PRKDC      | NM_006904    | 129.8875276 | 4.043549624 | 1.74E-11    | 32.12215494 |
| ZCCHC24    | NM_153367    | 108.6120173 | 9.819361075 | 2.20E-07    | 11.06100657 |
| TTYH2      | NM_032646    | 102.394482  | 10.83766061 | 6.27E-07    | 9.448024411 |
| USP3-AS1   | NR_034080    | 81.11897176 | 12.64900012 | 9.96E-05    | 6.413073838 |
| MANEA      | NM_024641    | 44.78548671 | 0.394782735 | 6.06E-06    | 113.4433772 |
| ARPC2      | NM_005731    | 65.62384623 | 6.222307566 | 4.28E-05    | 10.54654492 |
| ZNF618     | NM_133374    | 53.18877551 | 3.777982067 | 0.000111541 | 14.07862043 |
| DENND1A    | NM_020946    | 109.4863187 | 3.82858005  | 1.48E-09    | 28.5971084  |
| IPP        | NM_001145349 | 71.40423091 | 2.441267735 | 1.53E-06    | 29.24883243 |
| DDX17      | NM_006386    | 137.9023785 | 9.69203624  | 2.82E-10    | 14.22842168 |
| LIG3       | NM_002311    | 54.54894044 | 6.342577257 | 0.000390472 | 8.600437681 |
| USP8       | NM_005154    | 97.09996085 | 1.141756212 | 1.87E-09    | 85.04439024 |
| SFXN5      | NM_144579    | 84.66489013 | 8.938518388 | 5.08E-06    | 9.471915418 |
| NCBP2-AS2  | NR_024388    | 90.4452748  | 21.24353022 | 0.001076236 | 4.257544478 |
| ZNF436     | NM_030634    | 72.27853228 | 14.950228   | 0.001179587 | 4.834610702 |
| GYG1       | NM_001184721 | 48.33140508 | 5.276554867 | 0.001390188 | 9.159651761 |
| FSD1L      | NM_001287191 | 62.07792787 | 2.527189641 | 1.47E-05    | 24.56401643 |
| TCF25      | NM_014972    | 190.1681398 | 16.96890148 | 1.95E-12    | 11.20686216 |
| MNAT1      | NM_001177963 | 72.27853228 | 3.103154802 | 2.97E-06    | 23.29195187 |
| C4orf27    | NM_017867    | 71.8413816  | 5.175058209 | 9.87E-06    | 13.88223643 |
| TNRC18     | NM_001080495 | 76.69875203 | 10.49870999 | 9.67E-05    | 7.305540595 |
| PPP4R2     | NM_174907    | 108.6120173 | 2.310083807 | 3.32E-10    | 47.01648356 |
| MTMR3      | NM_021090    | 125.0301571 | 3.41170511  | 2.51E-11    | 36.64741033 |
| EBLN3      | NR_036592    | 54.98609113 | 5.526008112 | 0.000223728 | 9.950418098 |
| ZFP36L2    | NM_006887    | 136.9793643 | 23.86850773 | 9.10E-07    | 5.73891614  |
| FANCD2     | NM_001018115 | 54.11178977 | 3.787031854 | 9.74E-05    | 14.28870732 |
| COQ7       | NM_016138    | 72.27853228 | 2.828940842 | 1.71E-06    | 25.54967966 |
| NUDT8      | NM_001243750 | 92.24259043 | 17.67191701 | 0.000366668 | 5.219727458 |
| PHF5A      | NM_032758    | 125.0301571 | 13.81496613 | 2.10E-08    | 9.050341198 |
| KIAA0907   | NM_014949    | 150.2887363 | 7.669578214 | 1.16E-12    | 19.59543695 |
| TRIM35     | NM_171982    | 53.67463907 | 6.054833686 | 0.000406148 | 8.864758613 |
| ZSWIM6     | NM_020928    | 46.09693877 | 2.674777138 | 0.000664823 | 17.23393629 |
| SDC4       | NM_002999    | 163.1122449 | 11.44326606 | 8.12E-12    | 14.25399393 |
| ADCK2      | NM_052853    | 101.0830299 | 7.441094711 | 1.09E-07    | 13.58442996 |
| STAM2      | NM_005843    | 95.30264523 | 2.736508579 | 9.22E-09    | 34.8263645  |
| NUTM2A-AS1 | NR_024397    | 80.2446704  | 2.810053356 | 3.57E-07    | 28.55627998 |
| C4orf29    | NM_001039717 | 40.36526697 | 2.513947854 | 0.001890104 | 16.05652516 |
| PPM1F      | NM_014634    | 87.77365781 | 12.61417389 | 3.11E-05    | 6.958335803 |
| CTDP1      | NM_004715    | 73.58998434 | 6.357762221 | 9.03E-06    | 11.57482488 |
| NDC80      | NM_006101    | 55.42324183 | 1.382159813 | 4.63E-05    | 40.09901121 |
| PON3       | NM_000940    | 45.22263741 | 0.361646673 | 6.96E-06    | 125.0464631 |
| SREBF1     | NM_004176    | 129.0132262 | 20.2508333  | 6.69E-07    | 6.370761352 |
| ICE2       | NM_001018089 | 136.9793643 | 2.599370539 | 4.01E-13    | 52.69712886 |
| ACO1       | NM_002197    | 72.71568297 | 0.318526775 | 6.15E-09    | 228.2875054 |
| RNF144A    | NM_014746    | 88.2108085  | 1.626022781 | 4.29E-08    | 54.24942968 |
| GPN2       | NM_018066    | 79.8075197  | 9.9215611   | 2.15E-05    | 8.043847021 |
| NUMA1      | NR_104476    | 97.53711154 | 8.546524567 | 4.83E-07    | 11.41248829 |
| TXNDC16    | NM_020784    | 67.85831254 | 2.402676408 | 4.36E-06    | 28.24280137 |
| TIAM1      | NM_003253    | 67.37244898 | 2.386903585 | 5.74E-06    | 28.22587783 |
| METAP1D    | NM_199227    | 54.98609113 | 3.671567595 | 9.82E-05    | 14.97618924 |
| PSMD9      | NR_048555    | 65.18669554 | 7.057773091 | 0.000168897 | 9.23615632  |
| CNTROB     | NM_001037144 | 50.5658714  | 7.359228464 | 0.00239371  | 6.871083246 |
| TMEM183B   | NM_001079809 | 101.5201806 | 5.175953696 | 2.03E-08    | 19.61381159 |
| CSNK1E     | NM_001289912 | 80.68182108 | 10.79955531 | 5.70E-05    | 7.4708466   |
| METTL2A    | NM_181725    | 105.9891132 | 9.353002578 | 2.22E-07    | 11.33209494 |
| POMK       | NM_032237    | 142.759749  | 3.183922185 | 2.58E-13    | 44.83770038 |
| PRPF4B     | NM_003913    | 74.95014928 | 4.526803906 | 6.42E-06    | 16.55696841 |



|              |              |             |             |             |             |
|--------------|--------------|-------------|-------------|-------------|-------------|
| IL18         | NM_001562    | 51.87732345 | 2.638741951 | 8.22E-05    | 19.6598699  |
| ACADS        | NM_000017    | 85.1507537  | 8.607891243 | 7.32E-06    | 9.892173506 |
| COPS3        | NM_001199125 | 62.95222924 | 3.838306035 | 5.99E-05    | 16.4010448  |
| LHFPL2       | NM_005779    | 77.57305339 | 4.128465787 | 8.75E-07    | 18.78980168 |
| UQCC2        | NM_032340    | 110.8464837 | 10.28167728 | 3.99E-08    | 10.78097286 |
| TTLL7        | NM_024686    | 98.89727652 | 1.183511536 | 2.31E-09    | 83.56257924 |
| HECTD1       | NM_015382    | 59.01787307 | 3.738729187 | 3.07E-05    | 15.78554373 |
| RANGAP1      | NM_002883    | 110.4093329 | 14.29982789 | 4.87E-07    | 7.721025297 |
| CEP19        | NM_032898    | 73.58998434 | 6.236034592 | 1.81E-05    | 11.8007659  |
| MRPS21       | NM_031901    | 85.58790438 | 10.3114583  | 9.09E-06    | 8.300271588 |
| DGKA         | NM_201444    | 55.86039251 | 7.585672461 | 0.000852745 | 7.363934153 |
| REST         | NM_005612    | 77.57305339 | 5.763115344 | 3.00E-06    | 13.46026389 |
| SEC23A       | NM_006364    | 112.1579357 | 1.88990554  | 1.30E-10    | 59.34578916 |
| IMPDH1       | NM_001142575 | 91.31957618 | 13.49880195 | 1.15E-05    | 6.765013406 |
| CCDC110      | NM_001145411 | 49.20570646 | 4.448458367 | 0.001200425 | 11.06129414 |
| SNX29        | NM_032167    | 111.7207851 | 2.158515359 | 7.60E-10    | 51.75816081 |
| OXCT1-AS1    | NR_046635    | 66.06099693 | 13.45099202 | 0.004651706 | 4.91123605  |
| C9orf91      | NM_153045    | 56.29754319 | 5.369812193 | 0.000237367 | 10.48408048 |
| PRDX3        | NM_006793    | 169.8156438 | 10.5071581  | 2.75E-13    | 16.1619005  |
| TPT1         | NM_001286273 | 163.5981085 | 28.96263083 | 3.59E-08    | 5.648592818 |
| XRCC3        | NM_001100118 | 175.9844663 | 29.70655631 | 3.03E-09    | 5.924095154 |
| MTHFD1L      | NM_001242767 | 66.49814761 | 5.051689268 | 5.89E-05    | 13.1635467  |
| RPS5         | NM_001009    | 147.1799686 | 24.40770416 | 1.33E-07    | 6.03006197  |
| AURKA        | NM_198437    | 79.37036901 | 1.808010296 | 3.37E-08    | 43.89929039 |
| PFKL         | NM_002626    | 124.1071429 | 18.0080259  | 6.02E-07    | 6.891768345 |
| CCNL1        | NM_020307    | 129.8875276 | 17.75417197 | 1.09E-07    | 7.315887654 |
| EMC2         | NM_014673    | 64.74954487 | 0.322420352 | 1.31E-08    | 200.8233801 |
| LPIN3        | NM_022896    | 62.95222924 | 3.576433959 | 3.71E-05    | 17.6019549  |
| NGLY1        | NM_018297    | 87.33650713 | 1.783921206 | 2.35E-08    | 48.95760353 |
| NIPBL        | NM_133433    | 62.07792787 | 2.273599883 | 1.67E-05    | 27.303805   |
| MAP3K1       | NM_005921    | 38.56795136 | 3.286474168 | 0.003692257 | 11.73535814 |
| SNX24        | NM_014035    | 81.55612244 | 1.631689858 | 1.82E-07    | 49.98261285 |
| RNF213       | NM_001256071 | 119.2497724 | 10.26399958 | 3.12E-08    | 11.61825577 |
| OSBPL2       | NM_001278649 | 41.67671904 | 6.390695471 | 0.00471281  | 6.521468474 |
| MRPL14       | NM_032111    | 85.10204081 | 2.717884609 | 4.33E-08    | 31.31186679 |
| PGM3         | NM_015599    | 73.15283366 | 2.928176493 | 4.72E-07    | 24.98238539 |
| ANKRD54      | NM_138797    | 116.1410048 | 11.75422709 | 5.14E-08    | 9.880786198 |
| NECAB3       | NM_031231    | 139.6509813 | 29.63801838 | 1.81E-06    | 4.711886589 |
| C5orf55      | NM_138464    | 117.064019  | 18.79815541 | 1.22E-05    | 6.227420535 |
| SNRPA1       | NM_003090    | 92.67974111 | 2.90837935  | 1.07E-08    | 31.86645549 |
| CASP8AP2     | NM_001137668 | 119.2497724 | 6.483612006 | 2.82E-09    | 18.39249053 |
| COPRS        | NM_018405    | 74.46428571 | 9.105189636 | 4.37E-05    | 8.178224583 |
| AKAP8L       | NM_001291478 | 78.93321834 | 9.627659731 | 4.58E-05    | 8.198588291 |
| HADH         | NM_005327    | 58.5320095  | 4.635333839 | 0.000246632 | 12.62735577 |
| LOC101927814 | NR_110930    | 52.75162482 | 4.096794249 | 0.000306788 | 12.87631783 |
| PODXL        | NM_001018111 | 130.7618289 | 8.484035203 | 4.09E-10    | 15.41269288 |
| CCDC102A     | NM_033212    | 74.02713503 | 14.12839467 | 0.000394257 | 5.239599881 |
| SLC1A1       | NM_004170    | 37.69364998 | 2.47828437  | 0.003653333 | 15.20957419 |
| CLASP2       | NM_015097    | 90.8824255  | 2.09754646  | 3.72E-08    | 43.3279678  |
| GTPBP8       | NM_138485    | 109.049168  | 5.795262815 | 2.32E-09    | 18.81694955 |
| SS18         | NM_001007559 | 125.4673077 | 1.998567398 | 5.26E-12    | 62.77862225 |
| REV3L        | NM_001286432 | 117.5011696 | 3.988345995 | 1.92E-10    | 29.46112744 |
| ZNF33B       | NM_006955    | 147.6171194 | 2.189829813 | 9.35E-15    | 67.41031589 |
| CASC4        | NM_138423    | 83.79058876 | 3.293890611 | 2.25E-07    | 25.43818197 |
| PCGF6        | NM_001011663 | 103.3174962 | 5.149796933 | 1.60E-08    | 20.06244082 |
| YLPM1        | NM_019589    | 183.5134537 | 3.867092232 | 4.61E-16    | 47.45515305 |
| NOXA1        | NM_001256067 | 113.0322371 | 26.93720647 | 3.97E-05    | 4.196138051 |
| HEIH         | NR_045680    | 107.737716  | 22.67223717 | 0.000132076 | 4.751966698 |
| ZCCHC4       | NM_024936    | 75.38729997 | 2.028886339 | 6.86E-07    | 37.15698535 |
| GPR137B      | NM_003272    | 48.76855577 | 3.155218579 | 0.000311351 | 15.45647458 |
| TEX10        | NM_001161584 | 40.36526697 | 3.106876007 | 0.001869095 | 12.99223621 |
| NUDT21       | NM_007006    | 76.26160134 | 2.020355053 | 8.46E-08    | 37.74663331 |

|              |              |             |             |             |             |
|--------------|--------------|-------------|-------------|-------------|-------------|
| CUL4A        | NM_003589    | 173.3128494 | 6.392070579 | 4.22E-14    | 27.11372586 |
| MTPAP        | NM_018109    | 40.36526697 | 3.176940456 | 0.00177218  | 12.7057046  |
| ATP6AP2      | NM_005765    | 33.27343024 | 0.075087363 | 2.17E-05    | 443.1295617 |
| IL15RA       | NM_172200    | 57.65770813 | 5.395536961 | 0.000208504 | 10.68618537 |
| SLC52A3      | NM_033409    | 59.40631088 | 13.03678528 | 0.003357836 | 4.556822069 |
| RUNX3        | NM_004350    | 62.51507855 | 11.11980135 | 0.00108632  | 5.621960014 |
| ANKRD18A     | NM_147195    | 69.1697646  | 1.52808553  | 1.67E-06    | 45.26563679 |
| HSPA5        | NM_005347    | 136.9793643 | 15.76665182 | 1.45E-08    | 8.687917121 |
| SMAP1        | NM_021940    | 83.79058876 | 1.203361412 | 1.44E-08    | 69.63044347 |
| FLII         | NM_002018    | 67.42116185 | 14.21049455 | 0.000921773 | 4.744462737 |
| MRPL27       | NM_016504    | 145.431366  | 18.47019184 | 6.55E-09    | 7.873841659 |
| PRSS12       | NM_003619    | 37.2564993  | 2.863242863 | 0.003582863 | 13.01199412 |
| TBC1D20      | NR_111901    | 133.4334458 | 5.421775932 | 6.34E-12    | 24.61065295 |
| SUPT16H      | NM_007192    | 43.03688397 | 5.852621981 | 0.00431271  | 7.353436479 |
| B3GNT3       | NM_014256    | 101.5201806 | 10.25812752 | 3.12E-07    | 9.896560593 |
| N6AMT1       | NM_182749    | 127.2159105 | 3.649718158 | 1.40E-12    | 34.85636562 |
| MREG         | NM_018000    | 44.34833603 | 3.342958057 | 0.000593425 | 13.26619577 |
| TMEM39A      | NM_018266    | 49.69157001 | 4.924723819 | 0.001352291 | 10.09022472 |
| STT3A        | NM_152713    | 60.76647581 | 1.733749854 | 9.09E-06    | 35.04915987 |
| SUFU         | NM_016169    | 122.3585401 | 11.13921365 | 1.82E-08    | 10.98448633 |
| SERPINE2     | NM_006216    | 183.5134537 | 4.545643279 | 4.75E-16    | 40.37128355 |
| LOC285626    | NR_037889    | 75.82445064 | 1.928956012 | 1.48E-07    | 39.30854315 |
| ENOX2        | NM_182314    | 38.13080067 | 0.102960681 | 0.000237416 | 370.3433236 |
| SMARCD1      | NM_003076    | 112.1579357 | 10.5509403  | 4.30E-08    | 10.63013651 |
| ZC3HAV1L     | NM_080660    | 105.066099  | 13.9088841  | 1.69E-06    | 7.553884135 |
| PIP5K1P1     | NR_027712    | 43.47403467 | 5.145229545 | 0.004592085 | 8.449386814 |
| HMGCS1       | NM_001098272 | 66.06099693 | 3.346492654 | 3.90E-06    | 19.74036813 |
| TMEM30A      | NM_001143958 | 49.20570646 | 2.736283478 | 0.00022511  | 17.98267864 |
| LOC101926933 | NR_110002    | 48.33140508 | 3.431414201 | 0.000222177 | 14.08498137 |
| AK4          | NM_203464    | 39.05381491 | 2.665498174 | 0.001992215 | 14.6516007  |
| GOLGA1       | NM_002077    | 90.00812411 | 5.634795259 | 2.31E-07    | 15.97362814 |
| SLC35G2      | NM_025246    | 49.64285714 | 4.118635754 | 0.001307564 | 12.05322833 |
| MPHOSPH9     | NM_022782    | 146.742818  | 4.530951054 | 2.22E-12    | 32.3867586  |
| SPINT1       | NM_181642    | 97.97426223 | 15.45517634 | 1.34E-05    | 6.339252304 |
| PRPS1        | NM_002764    | 48.33140508 | 3.232980551 | 0.00020145  | 14.94948835 |
| LLPH-AS1     | NR_125724    | 95.78850885 | 5.098379731 | 2.48E-08    | 18.78802951 |
| ACAT2        | NM_005891    | 66.06099693 | 7.477342529 | 0.000133201 | 8.83482289  |
| LAMC1        | NM_002293    | 84.22773945 | 3.903960246 | 2.35E-07    | 21.57494804 |
| EIF3A        | NM_003750    | 138.7766799 | 10.82783904 | 3.93E-10    | 12.81665524 |
| TRMT2B       | NM_001167972 | 44.78548671 | 2.363379988 | 0.000461433 | 18.94976133 |
| PNMA1        | NM_006029    | 91.8054398  | 19.10622095 | 0.000319408 | 4.80500252  |
| BCDIN3D      | NM_181708    | 101.5201806 | 11.16119939 | 3.44E-07    | 9.095812833 |
| DNAJC5G      | NM_173650    | 30.60181325 | 2.040676964 | 0.003792231 | 14.99591253 |
| LINC00941    | NR_040245    | 44.34833603 | 6.060289408 | 0.004296534 | 7.317857786 |
| VEZT         | NM_017599    | 39.9281163  | 2.727829836 | 0.001998776 | 14.6373193  |
| MAP2K4       | NM_003010    | 131.2476924 | 1.974840696 | 3.33E-12    | 66.45988849 |
| VPS53        | NM_018289    | 97.09996085 | 3.231472974 | 1.22E-08    | 30.04820453 |
| C16orf52     | NM_001164579 | 54.54894044 | 2.822703085 | 9.03E-05    | 19.32507203 |
| LINC01273    | NR_109943    | 66.93529829 | 10.67655786 | 0.000519914 | 6.269370628 |
| CD2AP        | NM_012120    | 172.8756986 | 2.251407974 | 3.84E-16    | 76.78559399 |
| WDR59        | NM_030581    | 83.35343807 | 3.169016903 | 2.10E-07    | 26.30261707 |
| WHAMM        | NM_001080435 | 129.4503768 | 4.98928608  | 1.71E-11    | 25.94567133 |
| UQCC1        | NM_199487    | 47.8942544  | 5.688483339 | 0.001649111 | 8.419512117 |
| DYNC2LI1     | NM_015522    | 62.51507855 | 2.873536929 | 5.38E-06    | 21.75544637 |
| RFXAP        | NM_000538    | 75.82445064 | 3.931762063 | 5.00E-07    | 19.28510664 |
| GTF3C1       | NM_001286242 | 84.66489013 | 6.776441629 | 9.22E-07    | 12.49400419 |
| CUL7         | NM_014780    | 165.3467113 | 19.82253645 | 4.29E-10    | 8.34134984  |
| CRK          | NM_005206    | 198.5714286 | 12.08357248 | 9.23E-15    | 16.4331723  |
| ZNF678       | NR_102302    | 59.40631088 | 4.710253352 | 0.000169478 | 12.61212645 |
| LYRM2        | NR_028495    | 49.20570646 | 4.235380738 | 0.000395086 | 11.61777642 |
| TDG          | NM_003211    | 104.6289483 | 5.590377976 | 3.76E-09    | 18.71589877 |
| SLC16A1-AS1  | NR_103744    | 72.27853228 | 4.564194199 | 8.20E-06    | 15.83598969 |

|              |              |             |             |             |             |
|--------------|--------------|-------------|-------------|-------------|-------------|
| PDK3         | NM_005391    | 52.31447414 | 0.910563362 | 1.03E-05    | 57.45286526 |
| TBX3         | NM_016569    | 45.65978809 | 1.207995572 | 9.11E-05    | 37.79797637 |
| ERO1L        | NM_014584    | 91.31957618 | 2.045674828 | 1.10E-08    | 44.64031864 |
| ERLIN2       | NM_001003790 | 101.5201806 | 5.842271218 | 8.53E-09    | 17.37683459 |
| ATG14        | NM_014924    | 67.42116185 | 5.017136732 | 2.32E-05    | 13.43817509 |
| RBM45        | NM_152945    | 122.7956908 | 4.947436661 | 1.77E-10    | 24.82006325 |
| FAM53C       | NM_016605    | 93.99119317 | 19.27251919 | 0.000174224 | 4.876954189 |
| CUTC         | NM_015960    | 78.49606764 | 6.816011582 | 1.43E-05    | 11.51642228 |
| COLGALT1     | NM_024656    | 90.4452748  | 9.152962913 | 4.05E-06    | 9.881529692 |
| TMEM65       | NM_194291    | 88.2108085  | 4.839242464 | 3.86E-07    | 18.22822666 |
| C8orf74      | NM_001040032 | 42.11386972 | 5.500679539 | 0.004125773 | 7.656121288 |
| RAP2A        | NM_021033    | 55.86039251 | 1.900902667 | 2.35E-05    | 29.38624554 |
| FBXO31       | NM_001282683 | 146.742818  | 13.80442731 | 8.70E-10    | 10.63012718 |
| CNP          | NM_033133    | 117.9383204 | 25.83457746 | 2.36E-05    | 4.565134482 |
| DHODH        | NM_001361    | 110.8464837 | 7.549951992 | 5.94E-09    | 14.68174682 |
| TMEM194B     | NM_001142645 | 155.5832575 | 6.521148597 | 7.92E-13    | 23.85825981 |
| PSME2        | NM_002818    | 84.66489013 | 8.976772391 | 7.58E-06    | 9.431551392 |
| MEAF6        | NR_073091    | 65.62384623 | 2.65969905  | 2.90E-06    | 24.67341041 |
| GLO1         | NM_006708    | 96.22565948 | 1.266781462 | 1.75E-10    | 75.96074176 |
| METTL6       | NM_152396    | 41.23956835 | 2.22484685  | 0.00105389  | 18.55561419 |
| KIF26A       | NM_015656    | 79.8075197  | 11.43934501 | 4.91E-05    | 6.976581229 |
| USP11        | NM_004651    | 66.06099693 | 2.919218674 | 1.08E-05    | 22.62968428 |
| POM121       | NM_001257190 | 85.1507537  | 9.707774499 | 1.80E-05    | 8.771397987 |
| GOLIM4       | NM_014498    | 48.33140508 | 1.249918897 | 0.000248665 | 38.66763291 |
| CCDC38       | NM_182496    | 80.68182108 | 2.439737311 | 2.70E-07    | 33.0698804  |
| CDC42SE1     | NM_020239    | 136.5422136 | 13.67513336 | 6.04E-09    | 9.984708016 |
| LRAT         | NM_004744    | 76.69875203 | 4.420650088 | 2.48E-06    | 17.350107   |
| MRPL15       | NM_014175    | 71.40423091 | 6.050434458 | 2.68E-05    | 11.80150474 |
| C8orf76      | NM_032847    | 181.3277003 | 11.46304466 | 1.97E-13    | 15.81845886 |
| LSS          | NM_001145436 | 55.42324183 | 9.182333649 | 0.001774212 | 6.035855801 |
| CHURC1       | NM_145165    | 61.2036265  | 5.677177507 | 0.000105154 | 10.78064345 |
| FAM175B      | NM_032182    | 53.72335195 | 3.63576723  | 7.36E-05    | 14.77634528 |
| SOCS6        | NM_004232    | 80.68182108 | 2.909101094 | 1.83E-07    | 27.7342789  |
| VAMP4        | NR_033704    | 48.81726865 | 2.175271863 | 0.000230193 | 22.44191611 |
| GTPBP10      | NM_001042717 | 43.03688397 | 0.276715537 | 1.51E-05    | 155.5275301 |
| LINC00886    | NR_038387    | 75.38729997 | 5.522646472 | 8.53E-06    | 13.65057502 |
| GPD2         | NM_000408    | 91.31957618 | 2.849165293 | 3.59E-08    | 32.05134374 |
| SETDB1       | NM_012432    | 66.06099693 | 9.11380281  | 0.000198865 | 7.24845581  |
| IRF6         | NM_006147    | 54.98609113 | 5.809216727 | 0.000360926 | 9.465319286 |
| CAP2         | NM_006366    | 49.20570646 | 2.52729324  | 0.000353246 | 19.46972582 |
| RNPS1        | NM_001286627 | 71.40423091 | 15.64741486 | 0.001523748 | 4.563324457 |
| APIG1        | NM_001030007 | 80.68182108 | 4.102876666 | 2.45E-06    | 19.66469569 |
| NEO1         | NM_002499    | 44.78548671 | 1.497145013 | 0.000638212 | 29.91392705 |
| C1orf204     | NM_001134233 | 55.42324183 | 6.187961019 | 0.000372676 | 8.956624267 |
| INCA1        | NM_001167987 | 72.71568297 | 12.83228478 | 0.000422168 | 5.666620106 |
| PMF1         | NM_001199654 | 89.57097344 | 6.880056963 | 1.42E-06    | 13.01892905 |
| URGCP-MRPS24 | NM_001204871 | 78.01020409 | 7.235775081 | 1.94E-05    | 10.78118145 |
| LOC100507419 | NR_123723    | 112.5950864 | 17.00595822 | 4.08E-06    | 6.620919853 |
| RPL26L1      | NM_016093    | 90.8824255  | 8.108355178 | 1.28E-06    | 11.20849093 |
| VPS9D1       | NM_004913    | 212.3666642 | 37.27481722 | 4.40E-10    | 5.697322752 |
| SMAD2        | NM_005901    | 73.15283366 | 2.649615337 | 1.18E-06    | 27.60885047 |
| CSNK1D       | NR_110578    | 180.4046861 | 30.74614956 | 2.91E-09    | 5.86755378  |
| LOC101927795 | NR_110275    | 135.2307615 | 5.847860851 | 7.07E-11    | 23.12482546 |
| SNRPG        | NM_003096    | 71.40423091 | 10.27139826 | 0.000143406 | 6.951753707 |
| PPP3CA       | NM_001130692 | 90.4452748  | 2.517052545 | 4.44E-08    | 35.9330102  |
| CPE          | NM_001873    | 80.68182108 | 2.834908855 | 3.84E-07    | 28.46011114 |
| LAMTOR1      | NM_017907    | 125.9044585 | 22.35217941 | 2.25E-06    | 5.632759839 |
| LSM8         | NM_016200    | 62.07792787 | 5.991410343 | 5.65E-05    | 10.36115444 |
| CFC1B        | NM_001079530 | 58.09485881 | 8.298375256 | 0.001455176 | 7.000750993 |
| TYW1B        | NM_001145440 | 62.56379143 | 1.507060242 | 1.64E-05    | 41.51379599 |
| UBE2D1       | NM_003338    | 142.759749  | 3.427656091 | 5.63E-13    | 41.6493794  |
| ZNF561-AS1   | NR_122038    | 115.7038541 | 1.332342052 | 6.58E-14    | 86.8424546  |

|               |              |             |             |             |             |
|---------------|--------------|-------------|-------------|-------------|-------------|
| FAM149B1      | NM_173348    | 112.1579357 | 5.082702432 | 3.52E-09    | 22.06659493 |
| CSTF1         | NM_001033522 | 91.31957618 | 0.239480311 | 2.45E-13    | 381.3239416 |
| MYPOP         | NM_001012643 | 84.66489013 | 10.065542   | 7.56E-06    | 8.411359279 |
| ZNF561        | NM_152289    | 74.95014928 | 6.65484795  | 1.64E-05    | 11.26248862 |
| MED23         | NM_004830    | 54.98609113 | 2.853423342 | 7.12E-05    | 19.27021845 |
| PTPN11        | NM_080601    | 119.6869232 | 4.985849611 | 5.28E-10    | 24.00532156 |
| KIAA1462      | NM_020848    | 59.84346156 | 4.112083663 | 0.000131877 | 14.5530749  |
| FBXW2         | NM_012164    | 143.6340504 | 4.234104491 | 9.92E-13    | 33.92312369 |
| LRPAP1        | NM_002337    | 118.8126218 | 13.97238338 | 7.70E-08    | 8.50338976  |
| ORMDL1        | NM_001128150 | 157.3805731 | 7.017691413 | 4.15E-13    | 22.42626013 |
| EEFIG         | NM_001404    | 90.00812411 | 20.48887027 | 0.000322796 | 4.393025233 |
| IWS1          | NM_017969    | 125.0301571 | 4.448389742 | 8.31E-11    | 28.10683514 |
| VPS35         | NM_018206    | 83.35343807 | 1.266341223 | 1.23E-08    | 65.82225749 |
| ACAP2         | NM_012287    | 83.79058876 | 2.617196374 | 2.29E-07    | 32.01539998 |
| MED13         | NM_005121    | 66.93529829 | 5.732044415 | 5.58E-05    | 11.67738654 |
| SLC9B2        | NM_178833    | 62.95222924 | 3.458810898 | 1.25E-05    | 18.20054091 |
| TXNDC11       | NM_015914    | 130.3246782 | 7.120076067 | 3.93E-10    | 18.30383228 |
| ROPN1B        | NM_001012337 | 47.94296727 | 7.676556109 | 0.003887188 | 6.245374434 |
| ZNF684        | NM_152373    | 40.36526697 | 2.610468352 | 0.001123452 | 15.4628448  |
| SIRT1         | NM_012238    | 108.6120173 | 6.273430217 | 2.30E-08    | 17.31301912 |
| ITPKC         | NM_025194    | 68.29546324 | 10.46143196 | 0.000347046 | 6.528309267 |
| SEC22B        | NM_004892    | 46.58280234 | 3.031705338 | 0.000360926 | 15.36521434 |
| TMEM201       | NM_001010866 | 81.55612244 | 14.82802257 | 0.000203949 | 5.500134767 |
| SPATA5L1      | NM_024063    | 65.62384623 | 7.50882411  | 0.000142227 | 8.739563648 |
| STYX          | NM_001130701 | 74.07584791 | 2.762018389 | 7.23E-07    | 26.81946224 |
| BTBD7         | NM_001002860 | 115.7038541 | 3.929089748 | 1.93E-09    | 29.44800489 |
| PELP1         | NM_014389    | 108.6120173 | 7.556875955 | 2.71E-08    | 14.3726082  |
| SHOC2         | NM_007373    | 107.737716  | 2.29352892  | 4.92E-10    | 46.97464902 |
| NIFK          | NM_032390    | 62.51507855 | 8.051036502 | 0.000174578 | 7.764848481 |
| ARHGAP19      | NM_032900    | 105.066099  | 2.869161731 | 8.77E-10    | 36.61909255 |
| FRYL          | NM_015030    | 60.76647581 | 2.213628162 | 3.31E-05    | 27.45107641 |
| GAS5          | NR_002578    | 139.2138305 | 32.35852093 | 1.21E-05    | 4.302230959 |
| FAM86JP       | NR_024250    | 38.13080067 | 1.315018056 | 0.001097414 | 28.99640846 |
| LOC101927204  | NR_110184    | 53.67463907 | 3.874330718 | 0.000129905 | 13.85391258 |
| HAUS8         | NM_001011699 | 83.35343807 | 9.579804687 | 2.20E-05    | 8.700953808 |
| PARD6B        | NM_032521    | 59.01787307 | 7.566143284 | 0.000485926 | 7.800258448 |
| ERCC8         | NM_001290285 | 37.2564993  | 2.529130515 | 0.003508624 | 14.73095163 |
| DNPEP         | NM_012100    | 85.10204081 | 8.636027847 | 7.44E-06    | 9.854303659 |
| WFDC3         | NM_080614    | 57.65770813 | 8.591423126 | 0.000822042 | 6.711077697 |
| SRSF6         | NR_034009    | 246.9028337 | 15.45095504 | 7.12E-19    | 15.97977814 |
| ADPRH         | NM_001291949 | 64.74954487 | 3.734233781 | 8.72E-06    | 17.33944596 |
| TXN           | NM_003329    | 133.8705966 | 13.84185673 | 6.64E-09    | 9.671433477 |
| SLC7A1        | NM_003045    | 88.64795919 | 4.987804561 | 4.60E-07    | 17.7729416  |
| DIMT1         | NM_014473    | 79.8075197  | 2.79203157  | 2.61E-07    | 28.58403199 |
| RWDD2B        | NM_016940    | 47.8942544  | 1.794077324 | 7.13E-05    | 26.69575818 |
| VSIG10        | NM_019086    | 121.9213894 | 5.696454822 | 1.87E-10    | 21.4030293  |
| TRNAU1AP      | NR_003109    | 82.91628738 | 15.17614485 | 0.000244832 | 5.463593566 |
| EIF2S1        | NM_004094    | 138.2908163 | 4.117209814 | 1.52E-12    | 33.58847922 |
| MFI2          | NM_005929    | 76.26160134 | 18.40949209 | 0.00167461  | 4.142515228 |
| RAB8B         | NM_016530    | 30.16466256 | 0.608826535 | 0.001444173 | 49.54557797 |
| MPHOSPH6      | NM_005792    | 146.3056673 | 2.853896302 | 2.72E-14    | 51.26523595 |
| IPO9-AS1      | NR_046696    | 154.7089561 | 6.815156486 | 6.34E-12    | 22.70071956 |
| MAN2A1        | NM_002372    | 86.89935644 | 1.980453923 | 1.14E-07    | 43.87850454 |
| CCDC175       | NM_001164399 | 28.8532105  | 0.971619104 | 0.003321486 | 29.69600988 |
| RAB5C         | NM_201434    | 50.12872071 | 8.50856903  | 0.002832342 | 5.89155715  |
| LOC102723582  | NR_125405    | 66.06099693 | 5.312509846 | 3.40E-05    | 12.43498814 |
| PSPH          | NM_004577    | 40.36526697 | 3.271438132 | 0.001796512 | 12.33869184 |
| PFDN2         | NM_012394    | 109.9721823 | 6.545739125 | 9.72E-09    | 16.80057518 |
| LOC101927040  | NR_110954    | 58.96916018 | 2.006761119 | 2.52E-05    | 29.38524153 |
| JMJD7-PLA2G4B | NM_001198588 | 106.8634146 | 13.4284727  | 9.27E-07    | 7.957972365 |
| THEM4         | NM_053055    | 155.5832575 | 7.14769708  | 1.84E-12    | 21.76690699 |
| FANCB         | NM_152633    | 42.11386972 | 0.652725942 | 2.97E-05    | 64.51998767 |

|               |              |             |             |             |             |
|---------------|--------------|-------------|-------------|-------------|-------------|
| CLIP1         | NM_001247997 | 115.7038541 | 4.408366476 | 2.70E-09    | 26.24642365 |
| RBCK1         | NM_031229    | 144.9455024 | 13.28131519 | 3.51E-10    | 10.91349014 |
| SERP1         | NM_014445    | 69.1697646  | 14.0841426  | 0.001179909 | 4.911180365 |
| LRRC28        | NM_001284400 | 88.64795919 | 2.512065749 | 5.93E-08    | 35.28886901 |
| PTCHD2        | NM_020780    | 64.31239418 | 6.938420735 | 0.000205322 | 9.269024846 |
| TACC3         | NM_006342    | 101.9573313 | 22.8207065  | 5.93E-05    | 4.46775525  |
| PSMC6         | NM_002806    | 69.1697646  | 5.623141922 | 1.56E-05    | 12.30091034 |
| CYLD          | NM_001042412 | 44.34833603 | 0.355688492 | 1.45E-05    | 124.683078  |
| PDE6D         | NM_001291018 | 103.754647  | 5.475486442 | 1.71E-08    | 18.94893688 |
| GOLGB1        | NM_004487    | 107.737716  | 2.933271775 | 5.88E-10    | 36.72953761 |
| ATP7B         | NM_001243182 | 38.56795136 | 2.773089997 | 0.003607536 | 13.90793354 |
| MTHFS         | NM_006441    | 114.392402  | 2.995571584 | 8.82E-11    | 38.18717021 |
| VAMP8         | NM_003761    | 51.87732345 | 7.823271192 | 0.003132583 | 6.631154945 |
| ITGB1         | NM_002211    | 91.31957618 | 2.2622664   | 1.42E-08    | 40.3664114  |
| IMPAD1        | NM_017813    | 88.64795919 | 0.976936461 | 2.14E-09    | 90.74076226 |
| KIDINS220     | NM_020738    | 58.5320095  | 2.038740593 | 4.89E-05    | 28.70988576 |
| WDR33         | NM_001006623 | 90.4452748  | 4.723641334 | 2.32E-07    | 19.1473629  |
| PDXP          | NM_020315    | 144.5083517 | 16.32550192 | 4.46E-09    | 8.851694266 |
| FBXO36        | NM_174899    | 64.74954487 | 3.385652748 | 8.29E-06    | 19.12468575 |
| PTCD3         | NM_017952    | 95.3513581  | 5.273590963 | 8.09E-08    | 18.08091655 |
| OFD1          | NM_003611    | 63.82653061 | 0.706838864 | 1.13E-07    | 90.29855862 |
| DDX47         | NM_016355    | 39.49096561 | 3.304524704 | 0.001282583 | 11.95057358 |
| CYB5RL        | NM_001031672 | 47.45710371 | 6.512400055 | 0.00136993  | 7.287191099 |
| VAPB          | NR_036633    | 55.42324183 | 3.57467925  | 9.09E-05    | 15.50439576 |
| NEBL          | NM_001173484 | 91.31957618 | 1.142569417 | 2.96E-09    | 79.92475106 |
| YTHDC2        | NM_022828    | 72.27853228 | 2.192589936 | 1.83E-06    | 32.96491109 |
| PSEN1         | NM_007318    | 101.5201806 | 3.105589199 | 2.21E-09    | 32.68950724 |
| FAM149A       | NM_015398    | 45.65978809 | 2.478380715 | 0.000380963 | 18.4232341  |
| TMED8         | NM_213601    | 76.26160134 | 4.063934777 | 2.75E-06    | 18.76545898 |
| BCKDHA        | NM_000709    | 76.26160134 | 9.681084323 | 6.92E-05    | 7.877382202 |
| PFKFB2        | NM_006212    | 114.8295527 | 5.12589378  | 4.92E-10    | 22.40185959 |
| KIF2A         | NM_001243952 | 72.27853228 | 3.643632559 | 2.35E-06    | 19.83694325 |
| SLC16A5       | NM_004695    | 227.8617898 | 21.40053777 | 1.07E-14    | 10.64747962 |
| KIF11         | NM_004523    | 125.9044585 | 4.850904993 | 1.39E-10    | 25.95483908 |
| ZNF252P       | NR_023392    | 149.414435  | 7.393562778 | 3.96E-12    | 20.20871933 |
| DENR          | NM_003677    | 93.55404248 | 7.77892933  | 3.24E-07    | 12.02659627 |
| PPP4R1L       | NR_003505    | 73.58998434 | 3.582288868 | 1.22E-06    | 20.54272758 |
| POMZP3        | NM_152992    | 124.1558557 | 5.521866542 | 2.37E-10    | 22.48439993 |
| OCRL          | NM_000276    | 45.22263741 | 1.880090792 | 0.000457683 | 24.05343273 |
| SAR1B         | NM_016103    | 69.1697646  | 2.496010908 | 1.77E-06    | 27.71212433 |
| TBC1D10A      | NM_001204240 | 55.86039251 | 12.08648746 | 0.003098228 | 4.62172262  |
| KIAA0355      | NM_014686    | 65.62384623 | 4.344889892 | 5.16E-05    | 15.10368452 |
| KLLN          | NM_001126049 | 173.3128494 | 28.34928121 | 6.66E-09    | 6.113483023 |
| ZNF318        | NM_014345    | 80.68182108 | 5.415012351 | 1.75E-06    | 14.89965596 |
| ITGB3BP       | NR_045147    | 69.60691528 | 2.539760004 | 3.79E-06    | 27.40688694 |
| SYCE2         | NM_001105578 | 58.5320095  | 9.518471957 | 0.002663159 | 6.149307343 |
| PES1          | NM_001243225 | 55.42324183 | 11.66242449 | 0.004341649 | 4.75229159  |
| FAM161B       | NM_152445    | 58.09485881 | 10.93622892 | 0.002655783 | 5.312147291 |
| HDCC2         | NM_016063    | 58.96916018 | 2.903309342 | 1.39E-05    | 20.3110152  |
| FKBP1A-SDCBP2 | NR_037661    | 108.1748666 | 8.809697544 | 5.13E-08    | 12.27906703 |
| LINC00240     | NR_026775    | 31.47611462 | 0.62239359  | 0.001371081 | 50.5726844  |
| SMO           | NM_005631    | 62.51507855 | 6.269758727 | 6.53E-05    | 9.970890631 |
| BMP8B         | NM_001720    | 77.13590271 | 13.68886353 | 0.000248665 | 5.634938395 |
| RBM20         | NM_001134363 | 80.2446704  | 3.928663285 | 4.92E-07    | 20.42543852 |
| KIAA1429      | NM_183009    | 89.57097344 | 5.314106572 | 3.20E-07    | 16.85532125 |
| PPIL4         | NM_139126    | 64.74954487 | 3.958593872 | 3.69E-05    | 16.35670315 |
| SDCCAG3       | NM_006643    | 105.5032497 | 22.05468156 | 5.18E-05    | 4.783712219 |
| TTC13         | NM_001122835 | 43.91118534 | 3.089955651 | 0.001083254 | 14.21094355 |
| LOC100129940  | NM_001292024 | 45.22263741 | 4.453961017 | 0.002268376 | 10.15335277 |
| ITPR1-AS1     | NR_108075    | 40.80241766 | 1.489164303 | 0.000369823 | 27.39954052 |
| TPST2         | NM_003595    | 62.07792787 | 3.672764485 | 1.41E-05    | 16.90223485 |
| KLHDC3        | NM_057161    | 62.51507855 | 11.64311466 | 0.001692324 | 5.369274494 |

|           |              |             |             |             |             |
|-----------|--------------|-------------|-------------|-------------|-------------|
| ATXN2     | NM_002973    | 75.38729997 | 4.85849464  | 9.83E-06    | 15.5165963  |
| BMPR2     | NM_001204    | 90.4452748  | 2.831152358 | 3.95E-08    | 31.94645266 |
| TNKS      | NM_003747    | 90.4452748  | 2.395784259 | 3.96E-08    | 37.75184449 |
| ERCC6L2   | NM_001010895 | 139.2138305 | 2.633025496 | 5.06E-13    | 52.87219238 |
| MTBP      | NM_022045    | 66.98401118 | 1.618424479 | 5.37E-06    | 41.38840709 |
| RPP30     | NM_001104546 | 49.25441934 | 4.422289817 | 0.001332236 | 11.13776378 |
| RALGAPB   | NM_020336    | 78.93321834 | 3.541086486 | 4.00E-07    | 22.29067792 |
| SNRPB     | NM_198216    | 222.5185558 | 14.98793412 | 1.94E-16    | 14.8465128  |
| PARVA     | NM_018222    | 79.37036901 | 4.184584055 | 3.02E-06    | 18.96732578 |
| RMND5B    | NM_022762    | 170.6899452 | 11.23060458 | 7.10E-13    | 15.1986426  |
| MECR      | NM_016011    | 65.62384623 | 7.155512928 | 0.000186404 | 9.171089045 |
| BCL2L1    | NM_001191    | 83.79058876 | 9.093605252 | 7.65E-06    | 9.214232027 |
| PIP4K2C   | NM_024779    | 49.69157001 | 5.772664883 | 0.000937912 | 8.60808154  |
| C9orf41   | NM_152420    | 39.49096561 | 1.397436673 | 0.001386776 | 28.25957438 |
| ZBTB39    | NM_014830    | 94.42834386 | 12.17951111 | 1.00E-05    | 7.75304879  |
| AGAP11    | NM_133447    | 66.49814761 | 6.059489149 | 4.34E-05    | 10.9742168  |
| BLOC1S5   | NM_001199322 | 80.68182108 | 1.490051776 | 1.03E-07    | 54.14699165 |
| PMPCA     | NM_015160    | 103.3174962 | 19.02064455 | 1.53E-05    | 5.43186094  |
| TNS3      | NM_022748    | 47.8942544  | 4.299184659 | 0.001717285 | 11.14031106 |
| SMG8      | NM_018149    | 109.9721823 | 15.08073433 | 1.12E-06    | 7.292229932 |
| SLC25A28  | NM_031212    | 122.3585401 | 12.73235035 | 4.04E-08    | 9.610051304 |
| STKLD1    | NR_103997    | 70.91836734 | 13.29216629 | 0.000665995 | 5.335350597 |
| NDUFB9    | NM_005005    | 224.753022  | 5.225367251 | 5.32E-23    | 43.01190925 |
| NSD1      | NM_022455    | 109.049168  | 4.761603199 | 9.30E-09    | 22.90177561 |
| DEXI      | NM_014015    | 93.99119317 | 13.49892586 | 6.49E-06    | 6.962864612 |
| NIN       | NM_182946    | 102.394482  | 3.803196697 | 2.94E-09    | 26.92326748 |
| GGH       | NM_003878    | 72.27853228 | 3.847560322 | 6.71E-06    | 18.78554883 |
| LNX2      | NM_153371    | 68.73261391 | 2.517853547 | 3.57E-06    | 27.29809842 |
| DISP1     | NM_032890    | 64.31239418 | 1.096520009 | 7.08E-07    | 58.651364   |
| HLTF      | NM_003071    | 57.22055744 | 2.228102049 | 3.84E-05    | 25.68130013 |
| INTS10    | NM_018142    | 121.9213894 | 1.850145868 | 1.19E-12    | 65.89825782 |
| EVA1C     | NM_001286556 | 70.48121666 | 4.914817973 | 1.65E-05    | 14.34055484 |
| GTF3C3    | NM_012086    | 56.78340675 | 4.199905605 | 0.000220477 | 13.52016262 |
| GFPT1     | NM_002056    | 97.97426223 | 3.528550688 | 7.05E-09    | 27.76614846 |
| MUC13     | NM_033049    | 33.27343024 | 0.438493211 | 0.000248421 | 75.88128935 |
| EBP       | NM_006579    | 81.11897176 | 2.752471348 | 3.14E-08    | 29.47132286 |
| ALDH16A1  | NM_153329    | 161.3636422 | 17.3268807  | 3.40E-10    | 9.312907786 |
| SLC26A11  | NM_001166348 | 69.60691528 | 12.27151283 | 0.001123128 | 5.672235872 |
| UTP20     | NM_014503    | 36.38219793 | 0.130859534 | 0.000112605 | 278.0248156 |
| ENGASE    | NM_001042573 | 107.3005653 | 16.59152357 | 4.91E-06    | 6.467191805 |
| WDR82     | NM_025222    | 183.9506044 | 8.762463513 | 1.29E-14    | 20.99302372 |
| MST1R     | NM_002447    | 183.9506044 | 18.4620948  | 1.41E-11    | 9.963690812 |
| GTF2H1    | NM_001142307 | 43.91118534 | 1.734037419 | 0.000788337 | 25.32308984 |
| DLEU2     | NR_002612    | 52.31447414 | 6.759864309 | 0.000971848 | 7.738982876 |
| RNF20     | NM_019592    | 39.9281163  | 0.747761617 | 8.17E-05    | 53.39685189 |
| UQCR10    | NM_013387    | 86.89935644 | 11.67897201 | 3.41E-05    | 7.44066827  |
| CCDC138   | NM_144978    | 62.51507855 | 3.020823639 | 1.48E-05    | 20.6947131  |
| MEF2BNB   | NM_001145784 | 117.5011696 | 15.88843508 | 3.23E-07    | 7.395389732 |
| PKIA      | NM_181839    | 40.36526697 | 1.082882287 | 0.000229389 | 37.27576623 |
| UBR3      | NM_172070    | 102.8803456 | 2.987613233 | 3.92E-09    | 34.43563057 |
| PCCB      | NM_000532    | 78.49606764 | 3.66566391  | 6.73E-07    | 21.4138747  |
| TMEM209   | NM_032842    | 60.76647581 | 2.549595977 | 1.74E-05    | 23.83376675 |
| ESCO1     | NM_052911    | 103.754647  | 1.848318622 | 9.55E-10    | 56.13461105 |
| HS1BP3    | NM_022460    | 111.7207851 | 9.955967392 | 8.96E-08    | 11.22148965 |
| TRIM52    | NM_032765    | 123.2328415 | 15.49385983 | 1.36E-07    | 7.953656663 |
| THEM6     | NM_016647    | 121.4842387 | 27.4714289  | 2.04E-05    | 4.422203123 |
| ERMARD    | NM_001278533 | 101.1317428 | 4.348607478 | 1.45E-08    | 23.25612125 |
| GABARAPL2 | NM_007285    | 58.96916018 | 6.275160346 | 0.000297302 | 9.397235598 |
| OSGEPL1   | NM_022353    | 45.22263741 | 3.85402533  | 0.00167132  | 11.73387135 |
| ETAA1     | NM_019002    | 44.78548671 | 2.498811234 | 0.000211953 | 17.92271706 |
| TMEM189   | NM_001162505 | 140.5252827 | 15.52494673 | 6.84E-09    | 9.051579057 |
| PLOD3     | NM_001084    | 131.1989796 | 15.12920877 | 1.21E-08    | 8.671899608 |

|            |              |             |             |             |             |
|------------|--------------|-------------|-------------|-------------|-------------|
| UHRF2      | NR_046386    | 108.6120173 | 2.019834118 | 4.22E-10    | 53.77274123 |
| ZCCHC9     | NM_001131035 | 130.7618289 | 2.857453185 | 7.05E-14    | 45.76166973 |
| GATB       | NM_004564    | 54.11178977 | 4.165651098 | 0.000504008 | 12.98999568 |
| 3-Mar      | NM_178450    | 44.34833603 | 3.36518518  | 0.000662521 | 13.17857225 |
| PHIP       | NM_017934    | 73.15283366 | 1.409263043 | 1.04E-06    | 51.90857308 |
| PTS        | NM_000317    | 114.392402  | 4.12293166  | 5.41E-11    | 27.74540337 |
| PAXIP1-AS1 | NR_028090    | 104.6289483 | 15.45628111 | 6.44E-06    | 6.769348173 |
| CSE1L      | NM_001256135 | 153.8346547 | 5.272285081 | 2.45E-13    | 29.17798495 |
| ZC3H8      | NM_032494    | 62.95222924 | 4.842442356 | 7.19E-05    | 13.00009884 |
| DOCK1      | NM_001290223 | 97.97426223 | 1.28468202  | 1.06E-09    | 76.26343382 |
| CEP104     | NM_014704    | 51.44017277 | 5.639902645 | 0.000831272 | 9.120755447 |
| SPIDR      | NM_001282916 | 87.77365781 | 1.737669902 | 8.20E-08    | 50.51227378 |
| NDUFA7     | NM_005001    | 120.6099374 | 18.87192528 | 1.39E-06    | 6.390971542 |
| RBM4B      | NM_001286135 | 129.4503768 | 15.41768019 | 2.59E-08    | 8.396229213 |
| MVP        | NM_001293204 | 49.20570646 | 8.524266179 | 0.004281658 | 5.772427259 |
| HDAC7      | NM_015401    | 81.11897176 | 14.27076143 | 0.00015792  | 5.684277757 |
| PLD1       | NM_002662    | 47.01995303 | 2.790132489 | 0.000665947 | 16.85222949 |
| FASTKD5    | NM_021826    | 65.18669554 | 5.726052299 | 9.03E-05    | 11.38422986 |
| MAST1      | NM_014975    | 51.87732345 | 9.526297678 | 0.00297642  | 5.445696241 |
| ACLY       | NM_001096    | 76.69875203 | 9.942400978 | 8.52E-05    | 7.714308867 |
| ZNHIT1     | NM_006349    | 90.8824255  | 14.5743127  | 5.32E-05    | 6.235794948 |
| PLSCR1     | NM_021105    | 55.86039251 | 2.204425751 | 2.39E-05    | 25.34011068 |
| PNPLA6     | NM_001166112 | 69.60691528 | 12.3100902  | 0.001080266 | 5.654460217 |
| KLHDC10    | NM_014997    | 41.23956835 | 4.052113913 | 0.002035234 | 10.17729739 |
| SIK1       | NM_173354    | 141.8367347 | 8.638741053 | 1.63E-11    | 16.41868113 |
| SGTB       | NM_019072    | 40.80241766 | 3.736645221 | 0.00197065  | 10.91953216 |
| PRPF38B    | NM_018061    | 116.6268684 | 6.234372116 | 1.32E-09    | 18.70707526 |
| MGEA5      | NM_001142434 | 118.8613346 | 7.001247564 | 2.28E-09    | 16.97716493 |
| AACS       | NM_023928    | 111.2836343 | 7.535632292 | 2.67E-08    | 14.76765718 |
| RNPEP      | NM_020216    | 168.8926296 | 12.67408114 | 3.11E-12    | 13.32582833 |
| H2AFZ      | NM_002106    | 113.0322371 | 18.7892713  | 1.10E-05    | 6.015786098 |
| PRMT3      | NM_001145166 | 36.38219793 | 1.35155507  | 0.003456673 | 26.91876842 |
| HNRNPA1    | NM_002136    | 135.6679122 | 21.52983777 | 5.85E-07    | 6.301390365 |
| ASRGL1     | NM_001083926 | 65.62384623 | 3.704688998 | 7.16E-06    | 17.71372611 |
| FBXW4      | NM_022039    | 231.8448589 | 7.163340977 | 3.39E-19    | 32.36546461 |
| SMURF1     | NM_001199847 | 78.01020409 | 3.848863267 | 7.90E-07    | 20.26837502 |
| F2R        | NM_001992    | 48.33140508 | 5.471329205 | 0.001155998 | 8.833576499 |
| PRR12      | NM_020719    | 91.31957618 | 15.84986515 | 5.99E-05    | 5.761536473 |
| TIGD4      | NM_145720    | 51.44017277 | 1.417649604 | 1.35E-05    | 36.28553391 |
| DENND5A    | NM_001243254 | 81.11897176 | 4.705859529 | 2.95E-06    | 17.2378651  |
| HTT        | NM_002111    | 42.11386972 | 5.181576616 | 0.004987019 | 8.127616909 |
| PPP3CC     | NM_001243975 | 121.9213894 | 2.215361534 | 2.01E-11    | 55.0345339  |
| EMC6       | NM_001014764 | 58.5320095  | 3.658264918 | 0.00095935  | 15.99993735 |
| TAF3       | NM_031923    | 39.05381491 | 0.421599037 | 0.000216217 | 92.63259997 |
| C1orf52    | NR_024113    | 121.4842387 | 8.635935996 | 8.81E-10    | 14.06729262 |
| TCHP       | NM_032300    | 60.76647581 | 8.79968093  | 0.000469096 | 6.905531723 |
| TMEM115    | NM_007024    | 119.6869232 | 25.70935691 | 1.39E-05    | 4.65538378  |
| STK3       | NM_001256313 | 115.2667034 | 3.86961542  | 4.27E-10    | 29.78763801 |
| RPUSD2     | NM_152260    | 62.07792787 | 15.01798998 | 0.004054886 | 4.133571    |
| ZNF706     | NM_016096    | 107.737716  | 12.44395927 | 6.28E-07    | 8.657832582 |
| RNF168     | NM_152617    | 97.97426223 | 3.582919162 | 2.63E-08    | 27.34481516 |
| ZMAT3      | NM_152240    | 83.79058876 | 1.30176044  | 4.58E-08    | 64.36713407 |
| CCZ1       | NM_015622    | 136.1050629 | 4.222263974 | 1.82E-12    | 32.23509087 |
| PHF20L1    | NM_016018    | 112.6437993 | 2.849992    | 2.51E-10    | 39.52425106 |
| GSG2       | NM_031965    | 100.2087285 | 15.32481236 | 1.53E-05    | 6.53898568  |
| SH3D21     | NM_001162530 | 69.60691528 | 16.73073332 | 0.002490743 | 4.160422257 |
| TAOK1      | NM_025142    | 55.42324183 | 2.977174836 | 0.000106881 | 18.61605209 |
| MFHAS1     | NM_004225    | 95.73979591 | 5.417379191 | 8.82E-08    | 17.67271452 |
| PGRMC1     | NM_001282621 | 73.58998434 | 7.806187785 | 4.12E-05    | 9.427134776 |
| SCYL3      | NM_020423    | 74.51299858 | 2.770235319 | 6.63E-07    | 26.89771446 |
| RPS2       | NM_002952    | 273.5215779 | 56.92751276 | 4.56E-11    | 4.804734383 |
| POMT2      | NM_013382    | 144.071201  | 7.830229741 | 2.96E-11    | 18.3993581  |

|           |              |             |             |             |             |
|-----------|--------------|-------------|-------------|-------------|-------------|
| RAP1A     | NM_001291896 | 44.34833603 | 1.432409398 | 0.00051952  | 30.96065698 |
| MMAB      | NM_052845    | 54.98609113 | 10.45546401 | 0.004508696 | 5.25907708  |
| RSAD1     | NM_018346    | 119.2984853 | 16.21385565 | 2.12E-07    | 7.35781099  |
| SERPINH1  | NM_001235    | 101.0830299 | 19.55739975 | 6.08E-05    | 5.168531154 |
| DMXL1     | NM_005509    | 32.83627956 | 1.262302947 | 0.002083121 | 26.01299445 |
| NUP153    | NM_001278210 | 91.75672686 | 5.291600719 | 2.65E-07    | 17.34007    |
| SSR2      | NM_003145    | 106.377551  | 9.00025309  | 7.99E-08    | 11.81939552 |
| RRP1      | NM_003683    | 107.737716  | 16.13342837 | 1.62E-06    | 6.677918264 |
| ZNF638    | NM_001252613 | 54.54894044 | 4.833661702 | 0.000524558 | 11.28522098 |
| SLC25A13  | NR_027662    | 72.71568297 | 1.34544732  | 2.27E-06    | 54.04573029 |
| HHIPL2    | NM_024746    | 24.38427789 | 0.879334471 | 0.004451956 | 27.73037871 |
| EXT1      | NM_000127    | 52.31447414 | 1.364065057 | 2.31E-05    | 38.35189083 |
| RDH10     | NM_172037    | 173.7987129 | 3.777659632 | 1.94E-16    | 46.00698045 |
| RGS16     | NM_002928    | 86.89935644 | 9.779520807 | 9.01E-06    | 8.885850151 |
| ZNF22     | NM_006963    | 101.9573313 | 6.328914312 | 2.37E-08    | 16.10976642 |
| KLC1      | NM_005552    | 117.9383204 | 7.565616839 | 7.04E-09    | 15.588725   |
| EIF1AD    | NM_001242484 | 97.09996085 | 9.82813289  | 5.96E-07    | 9.879797307 |
| AGPAT4    | NM_020133    | 37.69364998 | 2.569551109 | 0.003807455 | 14.66935211 |
| TMEM245   | NM_032012    | 148.4914208 | 3.646059417 | 1.42E-13    | 40.7265499  |
| UBXN8     | NM_001282189 | 55.86039251 | 3.809408905 | 0.000162467 | 14.66379533 |
| PEX11G    | NM_001270539 | 121.4842387 | 15.25626567 | 7.46E-08    | 7.962907919 |
| DGCR14    | NM_022719    | 68.29546324 | 13.95131052 | 0.000923528 | 4.89527225  |
| NIPA1     | NM_144599    | 91.31957618 | 4.709575835 | 1.60E-07    | 19.39019126 |
| ACAD10    | NM_001136538 | 46.14565165 | 4.733648238 | 0.002695541 | 9.74843278  |
| CASC5     | NM_144508    | 54.98609113 | 3.423770088 | 9.25E-05    | 16.06010033 |
| CLN6      | NM_017882    | 93.55404248 | 10.64669934 | 2.23E-06    | 8.787140456 |
| ARRDC4    | NM_183376    | 61.64077717 | 4.560572748 | 3.16E-05    | 13.51601664 |
| NSL1      | NM_001297737 | 101.0830299 | 4.156118806 | 3.19E-08    | 24.32149672 |
| MFS11     | NM_001242534 | 118.375471  | 10.20895862 | 3.43E-08    | 11.59525427 |
| ZNF644    | NM_032186    | 75.38729997 | 3.727175768 | 1.40E-06    | 20.22638713 |
| TTI1      | NM_014657    | 94.42834386 | 4.28034608  | 9.07E-08    | 22.06091332 |
| KANSL2    | NM_017822    | 186.1850708 | 8.5023274   | 1.02E-14    | 21.89813001 |
| SLC35B1   | NM_005827    | 140.0881319 | 14.9610797  | 2.31E-09    | 9.363504155 |
| CNOT3     | NM_014516    | 107.3005653 | 18.32869455 | 6.45E-06    | 5.854239372 |
| PPIEL     | NR_003929    | 62.95222924 | 8.774923954 | 0.000340783 | 7.17410539  |
| TRNP1     | NM_001013642 | 191.4795919 | 26.78861134 | 1.07E-10    | 7.147798348 |
| PPFIA1    | NM_003626    | 134.3077472 | 6.600289845 | 4.67E-11    | 20.34876504 |
| GRPEL2    | NM_152407    | 78.93321834 | 9.74749505  | 1.72E-05    | 8.09779517  |
| STK39     | NM_013233    | 63.82653061 | 1.523208818 | 1.69E-05    | 41.9026793  |
| TMEM167A  | NM_174909    | 42.16258261 | 3.656659129 | 0.000838238 | 11.5303563  |
| CSNK1G1   | NM_022048    | 64.74954487 | 3.887433647 | 9.99E-06    | 16.65611577 |
| CHD4      | NM_001273    | 132.9962952 | 11.62833782 | 1.11E-09    | 11.43725761 |
| SYAP1     | NM_032796    | 87.33650713 | 1.916621246 | 1.42E-08    | 45.56795315 |
| PPP1R14C  | NM_030949    | 73.58998434 | 4.781277688 | 9.19E-06    | 15.39128014 |
| DYNLL2    | NM_080677    | 325.7873391 | 30.70226401 | 7.32E-21    | 10.61118291 |
| TNRC6A    | NM_014494    | 80.68182108 | 4.17051629  | 2.64E-06    | 19.34576332 |
| MTMR9     | NM_015458    | 137.4165149 | 3.051324974 | 2.75E-13    | 45.03503104 |
| SLC27A2   | NM_003645    | 61.2036265  | 2.665221424 | 2.15E-05    | 22.96380554 |
| TBC1D2B   | NM_015079    | 104.1917976 | 6.319171345 | 2.58E-08    | 16.48820579 |
| GSK3A     | NM_019884    | 147.6171194 | 21.5667748  | 2.86E-08    | 6.84465437  |
| TOB1      | NM_005749    | 266.8668918 | 27.66886716 | 4.75E-16    | 9.645024146 |
| NXT2      | NM_001242617 | 54.98609113 | 0.256121819 | 1.14E-07    | 214.6872586 |
| FAM228B   | NR_111929    | 76.69875203 | 7.589395977 | 2.49E-05    | 10.10604167 |
| DOCK3     | NM_004947    | 38.56795136 | 2.352680978 | 0.004054886 | 16.39319216 |
| HAUS4     | NM_001166270 | 133.4334458 | 3.841072271 | 7.41E-13    | 34.73859288 |
| TRAPPC8   | NM_014939    | 36.38219793 | 2.336707015 | 0.003693428 | 15.56985865 |
| ZNF746    | NM_152557    | 77.57305339 | 6.927305594 | 1.49E-05    | 11.19815668 |
| RNF219    | NM_024546    | 59.84346156 | 1.663052366 | 1.34E-05    | 35.98411138 |
| WDR53     | NM_182627    | 75.82445064 | 7.298125479 | 9.87E-06    | 10.38957892 |
| EXOC5     | NM_006544    | 90.8824255  | 1.608797723 | 1.06E-08    | 56.49089642 |
| C2CD2     | NM_015500    | 84.22773945 | 4.901510834 | 1.36E-06    | 17.18403617 |
| UHRF1BP1L | NM_015054    | 111.2836343 | 0.536626446 | 1.09E-12    | 207.376351  |



|           |              |             |             |             |             |
|-----------|--------------|-------------|-------------|-------------|-------------|
| EXOC4     | NM_021807    | 112.5950864 | 1.09035585  | 4.89E-11    | 103.2645318 |
| PTGFRN    | NM_020440    | 62.51507855 | 3.853949946 | 1.55E-05    | 16.2210406  |
| GJA3      | NM_021954    | 48.33140508 | 2.110836496 | 0.000147399 | 22.8968019  |
| RNF31     | NM_017999    | 90.00812411 | 11.2888621  | 9.60E-06    | 7.973179523 |
| ZNF776    | NM_173632    | 73.15283366 | 7.356448858 | 1.45E-05    | 9.944041625 |
| HTR7P1    | NR_002774    | 133.8705966 | 11.75270904 | 8.77E-10    | 11.39061608 |
| UBOX5     | NM_199415    | 65.18669554 | 3.882694448 | 4.07E-05    | 16.78903566 |
| TAPT1-AS1 | NR_027697    | 102.394482  | 3.484215602 | 5.69E-09    | 29.38810156 |
| FANCC     | NM_001243744 | 65.62384623 | 3.109481243 | 9.80E-06    | 21.10443547 |
| ZNF473    | NM_015428    | 65.62384623 | 10.46157209 | 0.000586209 | 6.272847492 |
| SEC24B    | NM_001300813 | 87.77365781 | 2.845987166 | 5.58E-08    | 30.84119944 |
| TET1      | NM_030625    | 69.60691528 | 2.368002389 | 4.49E-06    | 29.39478255 |
| CHMP3     | NR_036454    | 83.35343807 | 4.07799623  | 1.16E-06    | 20.43980263 |
| PURA      | NM_005859    | 66.93529829 | 10.02768059 | 0.000645905 | 6.67505289  |
| ACTN4     | NM_004924    | 137.4165149 | 12.07739834 | 1.04E-09    | 11.37798978 |
| SNRNP25   | NM_024571    | 76.26160134 | 10.35911876 | 0.000106165 | 7.361784634 |
| TMA16     | NM_018352    | 104.6289483 | 2.185500298 | 7.45E-11    | 47.87414046 |
| ALS2CL    | NM_001190707 | 98.41141291 | 12.99943094 | 5.48E-06    | 7.570440075 |
| EXOC6B    | NM_015189    | 81.60483533 | 2.163935957 | 2.94E-07    | 37.71129875 |
| NENF      | NR_026598    | 116.1410048 | 6.094498338 | 6.20E-10    | 19.05669644 |
| FANK1     | NM_145235    | 48.86598152 | 1.712063556 | 0.000305911 | 28.54215391 |
| ZNF23     | NM_145911    | 118.375471  | 5.674991886 | 6.41E-10    | 20.85914366 |
| C6orf226  | NM_001008739 | 145.8685166 | 27.22875542 | 0.001580744 | 5.357149615 |
| KIAA1324L | NM_001291991 | 34.58488231 | 0.505823445 | 0.000871105 | 68.37342688 |
| DMXL2     | NM_015263    | 122.3585401 | 2.135657449 | 3.68E-11    | 57.29314882 |
| OTUD3     | NM_015207    | 95.3513581  | 4.679563363 | 5.97E-08    | 20.37612288 |
| RINT1     | NM_021930    | 80.2446704  | 3.157763404 | 1.70E-07    | 25.41186914 |
| PSMA4     | NM_001102668 | 86.02505507 | 7.05519354  | 2.90E-06    | 12.19315311 |
| AGPAT3    | NM_020132    | 91.75672686 | 7.240806515 | 1.59E-06    | 12.67216942 |
| CIAO1     | NM_004804    | 53.23748838 | 7.310777918 | 0.000857802 | 7.282055204 |
| BPHL      | NR_026650    | 45.22263741 | 6.108918473 | 0.0025107   | 7.402724002 |
| TULP3     | NM_001160408 | 51.87732345 | 5.095289332 | 0.000832614 | 10.18142839 |
| RSRC2     | NR_036434    | 136.5422136 | 6.786595439 | 2.51E-11    | 20.11939784 |
| IFIH1     | NM_022168    | 41.23956835 | 1.730651169 | 0.001599214 | 23.82893161 |
| REEP5     | NM_005669    | 83.79058876 | 5.577060135 | 1.19E-06    | 15.02415013 |
| ARAP2     | NM_015230    | 84.66489013 | 0.714041483 | 4.12E-09    | 118.5713885 |
| SND1      | NM_014390    | 150.2887363 | 4.775449283 | 2.17E-12    | 31.47111977 |
| MYLIP     | NM_013262    | 195.9485244 | 3.377542603 | 1.01E-20    | 58.01511555 |
| IMMT      | NM_001100169 | 47.45710371 | 5.915016218 | 0.001526315 | 8.023156989 |
| STXBP4    | NM_178509    | 65.18669554 | 0.15201737  | 7.74E-08    | 428.810837  |
| NCOA5     | NM_020967    | 145.8685166 | 6.965642264 | 6.55E-12    | 20.94114385 |
| COQ4      | NM_016035    | 79.8075197  | 16.38353196 | 0.000304188 | 4.871203591 |
| MARK4     | NM_001199867 | 53.18877551 | 9.184881322 | 0.001847899 | 5.790905037 |
| LPAR1     | NM_001401    | 58.5320095  | 2.426265428 | 5.65E-05    | 24.12432244 |
| ZNF770    | NM_014106    | 152.4744898 | 4.086988258 | 4.93E-15    | 37.30729824 |
| ETS1      | NM_005238    | 62.07792787 | 1.427906948 | 8.08E-06    | 43.4747712  |
| MGC72080  | NR_002822    | 70.04406598 | 10.64522904 | 0.000229071 | 6.579855227 |
| SNHG15    | NR_003697    | 127.2646234 | 25.54748339 | 4.01E-06    | 4.981493537 |
| DNAJC9    | NM_015190    | 145.8685166 | 6.992516271 | 1.09E-12    | 20.86066174 |
| CEP192    | NM_032142    | 194.1512089 | 3.38101358  | 6.02E-18    | 57.423966   |
| TEX30     | NM_001286775 | 85.1507537  | 11.4216492  | 1.79E-05    | 7.45520653  |
| TSNAX     | NM_005999    | 81.60483533 | 5.671419931 | 1.06E-06    | 14.38878382 |
| GNPAT     | NM_014236    | 113.0322371 | 4.719350293 | 8.52E-10    | 23.95080468 |
| MRPS22    | NM_020191    | 71.40423091 | 10.11300571 | 0.000147155 | 7.060633895 |
| HIST2H2BA | NR_027337    | 31.03896394 | 1.626625567 | 0.004314352 | 19.08181242 |
| RPN1      | NM_002950    | 147.1799686 | 6.894119003 | 3.85E-12    | 21.34862607 |
| ZNF483    | NM_001007169 | 47.01995303 | 5.464332988 | 0.002643456 | 8.60488428  |
| PURB      | NM_033224    | 99.28571429 | 6.110517307 | 1.61E-08    | 16.24833206 |
| NHLH1     | NM_005598    | 39.9281163  | 3.569760852 | 0.002706332 | 11.18509557 |
| DPH7      | NM_138778    | 90.05683702 | 10.96980601 | 4.16E-06    | 8.20951956  |
| GLCE      | NM_015554    | 63.00094212 | 2.803732653 | 1.55E-05    | 22.47038143 |
| FAM175A   | NM_139076    | 84.66489013 | 4.638051934 | 3.12E-07    | 18.25440753 |

|              |              |             |             |             |             |
|--------------|--------------|-------------|-------------|-------------|-------------|
| EBPL         | NR_103802    | 57.22055744 | 2.762156842 | 2.97E-05    | 20.71589729 |
| ACTA2        | NM_001141945 | 61.2036265  | 4.194459666 | 0.000141782 | 14.59154012 |
| LOC100499484 | NR_036526    | 107.737716  | 3.482494096 | 4.65E-10    | 30.93694146 |
| LOC100996325 | NR_103444    | 70.91836734 | 12.62558883 | 0.000433575 | 5.617034443 |
| FAM86FP      | NR_024254    | 64.74954487 | 8.671360732 | 0.000394084 | 7.467057001 |
| MCM10        | NM_018518    | 140.9624333 | 4.066161296 | 3.33E-12    | 34.66720158 |
| SAFB2        | NM_014649    | 73.15283366 | 12.17914698 | 0.000139776 | 6.006400428 |
| ANKRD13A     | NM_033121    | 133.4334458 | 5.940991864 | 1.57E-11    | 22.45979273 |
| ERCC3        | NM_000122    | 82.91628738 | 4.573512877 | 8.93E-07    | 18.12967179 |
| SLC41A1      | NM_173854    | 65.62384623 | 10.46172124 | 0.000594134 | 6.272758061 |
| ZDHHC3       | NM_001135179 | 71.8413816  | 7.108287781 | 6.87E-05    | 10.10670696 |
| ZNF273       | NM_021148    | 36.38219793 | 2.127374898 | 0.002611201 | 17.10192122 |
| VIMP         | NM_018445    | 57.65770813 | 9.050621418 | 0.001250153 | 6.370580037 |
| DCAF13       | NM_015420    | 88.69667206 | 3.482420401 | 1.39E-07    | 25.46983472 |
| AGBL3        | NM_178563    | 95.73979591 | 1.309722026 | 5.90E-09    | 73.0993249  |
| STX7         | NM_003569    | 43.47403467 | 0.925419548 | 8.03E-05    | 46.97764896 |
| ZFP91-CNTF   | NR_024091    | 80.68182108 | 0.417756442 | 3.23E-10    | 193.1312433 |
| MALSU1       | NM_138446    | 90.4452748  | 8.045600612 | 1.25E-06    | 11.24158148 |
| ORC2         | NR_033915    | 97.53711154 | 4.524500366 | 5.35E-08    | 21.55754308 |
| UBA6         | NM_018227    | 58.96916018 | 1.187575891 | 1.76E-06    | 49.65506678 |
| LPAR2        | NM_004720    | 46.14565165 | 2.283866601 | 0.000246078 | 20.2050556  |
| BMI1         | NM_005180    | 80.68182108 | 6.735674414 | 3.07E-06    | 11.978284   |
| ATR          | NM_001184    | 92.67974111 | 2.71040323  | 3.26E-08    | 34.19407861 |
| GRAMD1B      | NM_020716    | 42.11386972 | 3.613627258 | 0.001162427 | 11.65418199 |
| DNAJC2       | NM_001129887 | 112.1579357 | 4.792263721 | 1.37E-09    | 23.40395734 |
| MTF1         | NM_005955    | 70.52992954 | 4.465507169 | 1.26E-05    | 15.79438278 |
| SNAI3-AS1    | NR_024402    | 130.3246782 | 17.07149628 | 5.38E-08    | 7.63405129  |
| OGFRL1       | NM_024576    | 102.394482  | 4.635502941 | 1.06E-08    | 22.08918498 |
| CCDC84       | NR_104051    | 73.15283366 | 16.28219132 | 0.000985699 | 4.492812559 |
| AMZ2P1       | NR_026903    | 126.390322  | 13.63981027 | 2.07E-08    | 9.266281529 |
| RBM28        | NM_001166135 | 61.2036265  | 4.022365574 | 0.000112667 | 15.21582894 |
| PPP4R4       | NM_020958    | 74.46428571 | 2.684348494 | 8.19E-07    | 27.7401708  |
| ANKRD40      | NM_052855    | 300.0916091 | 12.93683655 | 4.52E-25    | 23.19667625 |
| CRKL         | NM_005207    | 95.3513581  | 6.859834671 | 5.39E-07    | 13.89994988 |
| THNSL1       | NM_024838    | 76.69875203 | 5.949095171 | 4.89E-06    | 12.89250715 |
| POLA2        | NM_002689    | 93.11689181 | 8.928532677 | 6.29E-07    | 10.42913715 |
| RWDD2A       | NM_033411    | 87.33650713 | 11.0588424  | 1.74E-05    | 7.897436638 |
| SLC16A10     | NM_018593    | 68.73261391 | 3.656672647 | 5.09E-06    | 18.79649084 |
| BOLA3-AS1    | NR_045634    | 62.95222924 | 6.30719087  | 0.000172558 | 9.981024918 |
| DSP          | NM_001008844 | 123.6699922 | 4.799346946 | 1.72E-10    | 25.76808754 |
| ATPIF1       | NM_178190    | 138.7766799 | 25.55114003 | 2.60E-06    | 5.431330256 |
| WDFY1        | NM_020830    | 74.95014928 | 5.6048505   | 8.58E-06    | 13.37237261 |
| ITM2B        | NM_021999    | 148.4914208 | 3.298447501 | 6.70E-14    | 45.01857942 |
| CMC4         | NM_001018024 | 49.64285714 | 3.414052206 | 0.000516817 | 14.54074342 |
| TSPAN15      | NM_012339    | 71.8413816  | 8.609606715 | 7.05E-05    | 8.344327909 |
| BIN3         | NM_018688    | 80.68182108 | 9.863761223 | 4.90E-05    | 8.179620254 |
| DLL4         | NM_019074    | 129.4503768 | 13.56192768 | 1.30E-08    | 9.545131034 |
| EID1         | NM_014335    | 89.57097344 | 18.65364516 | 0.000339079 | 4.801794644 |
| JAK1         | NM_002227    | 130.3246782 | 5.216406713 | 8.12E-11    | 24.98361139 |
| PTRF         | NM_012232    | 108.1748666 | 14.8977282  | 2.02E-06    | 7.261165272 |
| RPL21P28     | NR_026911    | 119.6869232 | 12.01923551 | 4.66E-08    | 9.957948078 |
| PARP2        | NM_001042618 | 125.4673077 | 7.916025644 | 9.69E-10    | 15.84978541 |
| ZNF767P      | NR_027788    | 79.37036901 | 6.664737769 | 2.85E-06    | 11.90900104 |
| ST3GAL4-AS1  | NR_033839    | 101.9573313 | 7.490776655 | 3.02E-08    | 13.61104942 |
| TANGO6       | NM_024562    | 140.5252827 | 4.314508038 | 1.70E-11    | 32.57040697 |
| BRWD1        | NM_001007246 | 80.2446704  | 5.165479007 | 8.84E-07    | 15.53479751 |
| DLG1-AS1     | NR_038289    | 79.37036901 | 7.182113954 | 4.72E-06    | 11.05111525 |
| MKNK2        | NM_017572    | 226.5016248 | 37.28917144 | 3.69E-11    | 6.074193019 |
| TJAP1        | NM_001146016 | 73.58998434 | 12.45451901 | 0.000399381 | 5.908697418 |
| NINJ1        | NM_004148    | 101.5201806 | 18.684976   | 1.48E-05    | 5.433251859 |
| IFT81        | NM_001143779 | 54.11178977 | 2.899760747 | 9.64E-05    | 18.66077739 |
| PDZD8        | NM_173791    | 173.3615622 | 4.693358586 | 6.97E-15    | 36.93763412 |

|              |              |             |             |             |             |
|--------------|--------------|-------------|-------------|-------------|-------------|
| DUSP16       | NM_030640    | 56.73469387 | 2.641437967 | 4.98E-05    | 21.47871522 |
| UNC50        | NM_014044    | 118.375471  | 11.92104031 | 3.16E-08    | 9.929961478 |
| PRPF39       | NM_017922    | 72.27853228 | 1.049473949 | 2.21E-07    | 68.87120194 |
| GCC1         | NM_024523    | 117.064019  | 18.89695345 | 2.29E-06    | 6.194862008 |
| ANKRD62      | NM_001277333 | 31.03896394 | 0.767961845 | 0.001072323 | 40.41732557 |
| F2RL1        | NM_005242    | 85.58790438 | 10.07192276 | 9.47E-06    | 8.49767283  |
| TSPYL2       | NM_022117    | 86.89935644 | 11.1376194  | 1.24E-05    | 7.80232771  |
| TPRN         | NM_001128228 | 158.2548744 | 36.54037851 | 1.03E-06    | 4.330958816 |
| OPLAH        | NM_017570    | 149.414435  | 29.07606135 | 6.17E-07    | 5.138743974 |
| ALG2         | NM_033087    | 125.0301571 | 2.657784877 | 3.87E-13    | 47.04299365 |
| TMEM70       | NM_017866    | 120.6099374 | 1.11545666  | 1.51E-14    | 108.1260633 |
| BCKDHB       | NM_183050    | 107.737716  | 1.210789754 | 4.74E-11    | 88.98135753 |
| XPOT         | NM_007235    | 76.26160134 | 4.787453851 | 3.61E-06    | 15.92946976 |
| RARA         | NM_001145302 | 97.97426223 | 19.91002248 | 6.61E-05    | 4.920851412 |
| ZDHHC24      | NM_207340    | 87.33650713 | 19.75769372 | 0.000335139 | 4.420379645 |
| NOC4L        | NM_024078    | 80.68182108 | 12.40217602 | 6.50E-05    | 6.505456862 |
| LOH12CR1     | NM_001300742 | 80.29338327 | 1.751466277 | 2.79E-07    | 45.84352227 |
| STX8         | NR_033656    | 28.8532105  | 1.384454749 | 0.004185519 | 20.84084764 |
| SERTAD3      | NM_203344    | 91.31957618 | 19.31412305 | 0.000216737 | 4.728124387 |
| EXOSC10      | NM_001001998 | 75.38729997 | 7.418980468 | 3.26E-05    | 10.16140968 |
| POLR2J4      | NR_003655    | 93.11689181 | 10.49803794 | 3.69E-06    | 8.869932874 |
| EIF4G2       | NM_001418    | 94.91420746 | 17.58574168 | 6.51E-05    | 5.39722516  |
| GTSF1        | NM_144594    | 61.64077717 | 4.494794074 | 4.16E-05    | 13.71381562 |
| UBXN2B       | NM_001077619 | 76.69875203 | 0.832291765 | 4.51E-08    | 92.15368362 |
| GMCL1        | NM_178439    | 38.61666424 | 3.368113333 | 0.001894553 | 11.46536961 |
| TAF2         | NM_003184    | 64.31239418 | 2.176321729 | 7.36E-06    | 29.550959   |
| IREB2        | NM_004136    | 73.15283366 | 2.670071169 | 9.24E-07    | 27.39733476 |
| MRPS30       | NM_016640    | 68.29546324 | 5.394099598 | 1.68E-05    | 12.66114242 |
| C16orf70     | NM_025187    | 57.65770813 | 7.074076394 | 0.000978905 | 8.150563397 |
| RALGAPA2     | NM_020343    | 48.76855577 | 0.462682194 | 3.46E-05    | 105.4040038 |
| MRPS17       | NM_015969    | 56.29754319 | 10.65698947 | 0.002544497 | 5.282687326 |
| PIM1         | NM_001243186 | 126.3416091 | 16.50284275 | 1.11E-07    | 7.655748228 |
| STAU1        | NM_017452    | 116.1410048 | 6.164309533 | 1.23E-09    | 18.84087814 |
| PPIC         | NM_000943    | 61.2036265  | 4.852654088 | 6.58E-05    | 12.61240249 |
| COIL         | NM_004645    | 141.4482969 | 5.698258573 | 4.56E-12    | 24.82307448 |
| PLXNA3       | NM_017514    | 116.1410048 | 12.84329579 | 6.95E-08    | 9.042928441 |
| GAA          | NM_001079804 | 196.8228258 | 20.94101926 | 1.26E-12    | 9.398913364 |
| SETD8        | NM_020382    | 57.22055744 | 11.05658625 | 0.002897145 | 5.175246332 |
| RPL37        | NM_000997    | 156.5062718 | 17.50779337 | 4.96E-10    | 8.93923457  |
| TRIM33       | NM_015906    | 115.7038541 | 3.337999386 | 2.48E-10    | 34.66263493 |
| OPN3         | NM_014322    | 105.9404003 | 1.93412048  | 2.48E-10    | 54.77445767 |
| CCSAP        | NM_145257    | 88.64795919 | 9.787647188 | 6.51E-06    | 9.057126547 |
| PPP1R2       | NM_001291504 | 97.97426223 | 4.736233646 | 2.98E-08    | 20.68611254 |
| DPY19L3      | NM_001172774 | 54.54894044 | 0.452744674 | 2.62E-06    | 120.4849965 |
| FGFR3        | NM_001163213 | 187.4965228 | 23.56080205 | 7.65E-11    | 7.957985572 |
| ZNF213       | NM_001134655 | 108.6120173 | 12.00525272 | 4.71E-07    | 9.047041312 |
| ABHD3        | NM_138340    | 190.1681398 | 5.542948397 | 6.91E-17    | 34.3081202  |
| C8orf44-SGK3 | NM_001204173 | 53.67463907 | 4.514542857 | 0.000552732 | 11.88927446 |
| IGF2R        | NM_000876    | 52.75162482 | 1.890046217 | 0.000176913 | 27.9102301  |
| TMEM216      | NM_016499    | 118.375471  | 9.985746445 | 3.14E-08    | 11.8544439  |
| RRP36        | NM_033112    | 157.8177238 | 11.94875442 | 8.46E-12    | 13.20788078 |
| TAX1BP1      | NM_006024    | 79.8075197  | 2.241306396 | 2.87E-07    | 35.60759022 |
| THUMPD3      | NM_015453    | 122.7956908 | 4.289812045 | 4.16E-11    | 28.62495828 |
| NUP85        | NM_024844    | 139.6509813 | 13.43768215 | 1.51E-09    | 10.39249029 |
| METAP1       | NM_015143    | 112.1579357 | 4.446065843 | 2.95E-09    | 25.2263326  |
| C6orf120     | NM_001029863 | 112.1579357 | 10.51902294 | 1.31E-07    | 10.66239101 |
| KIAA0232     | NM_014743    | 148.05427   | 3.864542023 | 1.40E-12    | 38.3109484  |
| CSR2         | NM_001300965 | 94.42834386 | 3.711843249 | 2.22E-08    | 25.43974449 |
| CALR3        | NM_145046    | 42.16258261 | 3.389160394 | 0.000671926 | 12.44042114 |
| NAT10        | NM_001144030 | 93.11689181 | 5.772966071 | 9.86E-08    | 16.12981796 |
| MRPL48       | NM_016055    | 132.5591446 | 3.359387163 | 3.63E-12    | 39.45932343 |
| MRS2         | NM_020662    | 82.04198601 | 3.077629856 | 4.58E-08    | 26.65752213 |

|                 |              |             |             |             |             |
|-----------------|--------------|-------------|-------------|-------------|-------------|
| NGRN            | NR_028052    | 129.4503768 | 13.18617394 | 1.76E-08    | 9.817129468 |
| TATDN1          | NR_027427    | 125.0301571 | 6.90811375  | 1.03E-09    | 18.09902987 |
| ENTPD5          | NM_001249    | 123.2328415 | 4.393249053 | 1.90E-10    | 28.05050203 |
| GADD45GIP1      | NM_052850    | 192.8397567 | 26.80791332 | 3.32E-10    | 7.193389296 |
| LMNB2           | NM_032737    | 173.3128494 | 17.58618805 | 4.03E-11    | 9.855054935 |
| TASP1           | NM_017714    | 104.1917976 | 0.795168885 | 1.19E-10    | 131.0310294 |
| AGO1            | NM_012199    | 111.7207851 | 6.069559813 | 2.49E-09    | 18.40673599 |
| TTC38           | NM_017931    | 100.2087285 | 14.08611245 | 3.40E-06    | 7.114008845 |
| TRMT11          | NM_001031712 | 86.02505507 | 1.946571841 | 3.95E-08    | 44.19310568 |
| MRPS31          | NM_005830    | 90.8824255  | 0.510305942 | 1.22E-11    | 178.0939982 |
| DNAJC14         | NM_032364    | 62.51507855 | 13.45309048 | 0.002053759 | 4.646893488 |
| OSBPL11         | NM_022776    | 88.69667206 | 3.041228685 | 4.23E-08    | 29.16474927 |
| GCLM            | NM_002061    | 91.31957618 | 2.389351915 | 2.84E-09    | 38.21939147 |
| RPF2            | NM_032194    | 40.36526697 | 3.825713547 | 0.001912791 | 10.55104269 |
| RPL7L1          | NM_198486    | 113.0322371 | 9.116731505 | 1.56E-08    | 12.39832905 |
| PPM1G           | NM_177983    | 91.75672686 | 7.280260407 | 8.47E-07    | 12.60349517 |
| USP5            | NM_003481    | 64.31239418 | 15.71438214 | 0.003879438 | 4.092581791 |
| CDCA7           | NM_031942    | 133.8705966 | 8.699925413 | 1.68E-10    | 15.38755682 |
| TMED9           | NM_017510    | 101.9573313 | 14.61639676 | 5.75E-06    | 6.975544858 |
| PHOSPHO2-KLHL23 | NM_001199290 | 164.4724099 | 6.411884146 | 2.58E-13    | 25.65118242 |
| MAP4K3          | NM_001270425 | 59.89217444 | 1.870881135 | 2.98E-05    | 32.01281648 |
| USP48           | NM_001032730 | 72.71568297 | 4.364505915 | 1.30E-05    | 16.66069067 |
| CENPV           | NM_181716    | 118.8126218 | 12.05571619 | 2.10E-08    | 9.855293528 |
| E2F5            | NM_001083588 | 80.2446704  | 3.077278055 | 1.74E-07    | 26.07650949 |
| HMGN2           | NM_005517    | 146.742818  | 25.16203349 | 1.92E-07    | 5.831914105 |
| LEPROT          | NM_001198681 | 58.09485881 | 4.399154402 | 0.000132887 | 13.20591493 |
| RASA2           | NM_006506    | 129.0132262 | 2.200628831 | 7.43E-12    | 58.62561844 |
| CKAP2           | NM_001098525 | 93.99119317 | 6.119133566 | 2.88E-07    | 15.36021271 |
| KIF13B          | NM_015254    | 44.78548671 | 2.449501555 | 0.000654465 | 18.28351022 |
| GEMIN5          | NM_001252156 | 57.22055744 | 1.646977769 | 2.94E-05    | 34.74276248 |
| RB1CC1          | NM_001083617 | 43.03688397 | 1.661996844 | 0.000997616 | 25.89468453 |
| SLC25A16        | NM_152707    | 64.31239418 | 4.010765465 | 3.86E-05    | 16.03494264 |
| GPC1            | NM_002081    | 90.8824255  | 18.40225544 | 0.000164509 | 4.938656883 |
| MED17           | NM_004268    | 97.53711154 | 2.646668609 | 1.44E-09    | 36.85278589 |
| ALDH1B1         | NM_000692    | 54.54894044 | 7.535850736 | 0.002152343 | 7.238590884 |
| SHPRH           | NM_173082    | 51.87732345 | 0.34829677  | 4.12E-06    | 148.9457493 |
| EEF1A1          | NM_001402    | 1603.338392 | 225.2716214 | 5.08E-87    | 7.117356291 |
| RAET1K          | NR_024045    | 62.51507855 | 14.98335637 | 0.004720825 | 4.172301386 |
| EFHD2           | NM_024329    | 135.6679122 | 13.24781285 | 3.08E-09    | 10.24077814 |
| MOB3A           | NM_130807    | 68.29546324 | 15.6864672  | 0.002754166 | 4.353782301 |
| FAM53A          | NM_001174070 | 72.27853228 | 7.96085858  | 6.51E-05    | 9.07923832  |
| L3MBTL1         | NM_032107    | 72.71568297 | 7.763435102 | 5.93E-05    | 9.366431484 |
| LOC553103       | NR_110997    | 73.15283366 | 4.839345972 | 7.66E-06    | 15.11626449 |
| CLK1            | NM_001162407 | 208.3348823 | 6.516704063 | 1.14E-19    | 31.9693637  |
| GTF2A2          | NM_004492    | 93.99119317 | 2.507303889 | 1.04E-09    | 37.48695704 |
| EME1            | NM_001166131 | 136.1050629 | 22.72733348 | 4.24E-07    | 5.988606757 |
| CCNK            | NM_001099402 | 87.33650713 | 5.899917904 | 2.66E-07    | 14.8030038  |
| SLC9A3R1        | NM_004252    | 189.2938384 | 24.43487314 | 1.20E-10    | 7.746872158 |
| HERC5           | NM_016323    | 43.91118534 | 3.247091078 | 0.001007346 | 13.52323796 |
| AGPS            | NM_003659    | 100.2087285 | 2.913013265 | 5.72E-09    | 34.40036808 |
| SEC14L2         | NM_001291932 | 93.99119317 | 15.09321216 | 3.34E-05    | 6.227381699 |
| TERF2           | NM_005652    | 147.6171194 | 8.435952814 | 3.16E-11    | 17.49857102 |
| NFE2L3          | NM_004289    | 70.91836734 | 13.66117838 | 0.000700769 | 5.191233534 |
| MIATNB          | NR_110543    | 42.16258261 | 3.181424985 | 0.001153708 | 13.25273511 |
| ZNF766          | NM_001010851 | 51.44017277 | 2.981109048 | 9.86E-05    | 17.25538112 |
| CTTN            | NM_005231    | 118.8126218 | 11.81138385 | 2.00E-08    | 10.05916184 |
| LSM1            | NR_045493    | 69.1697646  | 5.38607093  | 9.95E-06    | 12.84234194 |
| NKRF            | NM_001173487 | 35.45918367 | 3.179217585 | 0.004810574 | 11.15343091 |
| PCTP            | NM_021213    | 95.78850885 | 2.135959239 | 7.19E-10    | 44.84566329 |
| PLA2G16         | NM_007069    | 51.00302207 | 5.019130207 | 0.000786631 | 10.16172523 |
| SPATA20         | NM_001258372 | 109.9721823 | 24.99436185 | 8.42E-05    | 4.399879579 |
| USF1            | NM_007122    | 91.31957618 | 16.53291497 | 6.37E-05    | 5.52350123  |

|              |              |             |             |             |             |
|--------------|--------------|-------------|-------------|-------------|-------------|
| LMAN1        | NM_005570    | 66.06099693 | 4.590295708 | 3.41E-05    | 14.3914469  |
| PPP1R37      | NM_019121    | 75.38729997 | 13.08127807 | 0.000454962 | 5.762991931 |
| EDEM1        | NM_014674    | 50.5658714  | 6.682270176 | 0.00274352  | 7.56716955  |
| RERE         | NM_012102    | 129.0132262 | 4.817319546 | 2.13E-10    | 26.78112277 |
| SHANK3       | NM_033517    | 53.18877551 | 9.265274572 | 0.001865707 | 5.740658315 |
| WDR90        | NM_145294    | 108.6120173 | 13.11248224 | 4.86E-07    | 8.283101194 |
| XRN2         | NM_012255    | 113.4693878 | 1.797145688 | 8.48E-11    | 63.13866958 |
| MESDC1       | NM_022566    | 104.1917976 | 21.12456353 | 0.000120545 | 4.932258005 |
| MAPK3        | NM_001040056 | 58.5320095  | 11.21378595 | 0.004501622 | 5.219647475 |
| DTYMK        | NR_033255    | 82.91628738 | 20.22977335 | 0.001193058 | 4.098725476 |
| TTC9C        | NM_173810    | 54.54894044 | 4.859224288 | 0.000194762 | 11.2258536  |
| FNIP1        | NM_133372    | 63.87524348 | 2.58470278  | 1.65E-05    | 24.71280024 |
| DEPDC1B      | NM_018369    | 61.2036265  | 1.660290122 | 2.34E-05    | 36.86321186 |
| AVEN         | NM_020371    | 102.394482  | 0.387809294 | 1.70E-11    | 264.0330787 |
| PRKCQ-AS1    | NR_036502    | 50.5658714  | 2.361709424 | 5.31E-05    | 21.41070823 |
| LOC100270746 | NR_026776    | 62.95222924 | 2.204880744 | 7.53E-05    | 28.551308   |
| DEPDC1-AS1   | NR_110671    | 82.91628738 | 3.320567473 | 1.11E-07    | 24.97051726 |
| UROS         | NM_000375    | 125.4673077 | 10.98672615 | 5.59E-09    | 11.41989943 |
| MRTO4        | NM_016183    | 72.71568297 | 17.52261238 | 0.00293278  | 4.149819752 |
| LINC00936    | NR_028138    | 126.7787599 | 22.49779264 | 3.43E-06    | 5.635164388 |
| GSK3B        | NM_002093    | 168.0183282 | 2.452236094 | 3.67E-15    | 68.51637514 |
| CLCN7        | NM_001114331 | 57.65770813 | 11.64236753 | 0.003018905 | 4.95240405  |
| VPS16        | NM_080413    | 126.7787599 | 6.634655732 | 4.17E-10    | 19.10856644 |
| FAM173A      | NM_023933    | 204.3518133 | 42.04340809 | 8.23E-08    | 4.860495915 |
| MNS1         | NM_018365    | 25.30729214 | 0.180389242 | 0.001974192 | 140.2926911 |
| WDR62        | NM_001083961 | 61.64077717 | 9.919611648 | 0.001157669 | 6.214031291 |
| ANKLE2       | NM_015114    | 109.049168  | 11.04613903 | 1.78E-07    | 9.872152409 |
| LINC01185    | NR_033980    | 90.8824255  | 3.599246005 | 9.37E-08    | 25.25040672 |
| NDUFA13      | NM_015965    | 106.8634146 | 8.864026351 | 7.87E-08    | 12.0558548  |
| EDEM2        | NM_018217    | 48.81726865 | 4.885153032 | 0.001317607 | 9.992986573 |
| PERP         | NM_022121    | 126.3416091 | 3.337953264 | 4.84E-12    | 37.8500234  |
| TMF1         | NM_007114    | 54.98609113 | 2.603034322 | 5.82E-05    | 21.12384407 |
| ZMAT5        | NM_019103    | 54.54894044 | 9.651767898 | 0.004953312 | 5.651704539 |
| TMSB15A      | NM_021992    | 55.42324183 | 4.907093841 | 0.000569124 | 11.29451435 |
| DDIT4L       | NM_145244    | 62.95222924 | 8.551613888 | 0.00028228  | 7.361444291 |
| EFR3A        | NM_015137    | 141.4482969 | 1.393705074 | 1.01E-13    | 101.4908388 |
| OAZ2         | NM_001301302 | 95.30264523 | 10.4465088  | 1.61E-06    | 9.122918199 |
| NR4A3        | NM_173199    | 54.98609113 | 5.74274768  | 0.000260475 | 9.574874989 |
| DDX6         | NM_001257191 | 118.8126218 | 3.341273591 | 1.92E-11    | 35.55908205 |
| EFNA4        | NM_182690    | 109.4863187 | 7.061224594 | 1.70E-08    | 15.50528768 |
| TFAP2E       | NM_178548    | 70.04406598 | 12.72019208 | 0.000618262 | 5.506525807 |
| SOX4         | NM_003107    | 80.68182108 | 18.69854115 | 0.00109792  | 4.314872503 |
| KLHL12       | NM_021633    | 163.5981085 | 3.802888131 | 6.64E-15    | 43.01943755 |
| DUSP5        | NM_004419    | 93.99119317 | 12.70162617 | 6.23E-06    | 7.399933827 |
| ELF3         | NM_001114309 | 121.0470881 | 23.97349531 | 8.14E-06    | 5.04920482  |
| FBXO45       | NM_001105573 | 100.6458792 | 3.647097833 | 5.26E-09    | 27.59615558 |
| TSC2D2       | NM_014779    | 84.22773945 | 5.135301726 | 1.20E-06    | 16.40171191 |
| TRAF7        | NM_032271    | 108.6120173 | 23.46004939 | 5.62E-05    | 4.629658512 |
| EPC2         | NM_015630    | 108.6120173 | 1.559792684 | 5.10E-10    | 69.63234179 |
| AMACR        | NM_014324    | 98.46012576 | 2.651953123 | 6.87E-10    | 37.12740052 |
| UGGT2        | NM_020121    | 85.58790438 | 1.802179574 | 1.26E-07    | 47.49132973 |
| BRPF1        | NM_004634    | 66.06099693 | 13.46775391 | 0.001590777 | 4.905123554 |
| CENPH        | NM_022909    | 117.5011696 | 4.132397473 | 1.09E-10    | 28.43414033 |
| LOC100287944 | NR_040246    | 79.8075197  | 2.871675269 | 4.96E-07    | 27.7912759  |
| CBX2         | NM_032647    | 135.6679122 | 29.55265404 | 6.24E-06    | 4.590718386 |
| CNBP         | NM_001127193 | 130.373391  | 14.94509054 | 1.89E-08    | 8.72349289  |
| EID2B        | NM_152361    | 105.066099  | 18.17502502 | 3.58E-05    | 5.780795287 |
| CDCA4        | NM_017955    | 151.1630377 | 18.24562359 | 3.51E-09    | 8.284892918 |
| POLR3G       | NM_006467    | 84.22773945 | 1.315659807 | 2.61E-08    | 64.01939087 |
| PLEKHG1      | NM_001029884 | 42.59973328 | 2.802053826 | 0.001222971 | 15.20303889 |
| MDP1         | NM_001199822 | 97.97426223 | 21.10058132 | 0.000417081 | 4.643202041 |
| PDLIM7       | NM_213636    | 142.3225982 | 31.86575675 | 3.31E-06    | 4.466317851 |

|              |              |             |             |             |             |
|--------------|--------------|-------------|-------------|-------------|-------------|
| RNF214       | NM_001077239 | 49.20570646 | 3.57610814  | 0.000303836 | 13.75956893 |
| RAD21        | NM_006265    | 97.97426223 | 3.936221949 | 2.30E-08    | 24.89043136 |
| PRKCH        | NM_006255    | 72.71568297 | 3.272233875 | 2.99E-06    | 22.22203111 |
| TMOD3        | NM_014547    | 140.0881319 | 3.599378038 | 6.69E-13    | 38.92009409 |
| CNNM2        | NM_199077    | 139.6509813 | 13.13429743 | 9.06E-10    | 10.63254293 |
| GHITM        | NM_014394    | 50.12872071 | 4.778433923 | 0.00048469  | 10.49061712 |
| PRUNE        | NM_021222    | 35.94504724 | 3.385614193 | 0.003018954 | 10.61699449 |
| ABCD1        | NM_000033    | 55.42324183 | 9.547418308 | 0.004416615 | 5.805050123 |
| ACVR2A       | NM_001278579 | 70.04406598 | 1.121192835 | 1.01E-07    | 62.47280913 |
| ARPC4        | NM_005718    | 121.4842387 | 8.72416201  | 2.32E-09    | 13.92503241 |
| LINC01106    | NR_027244    | 69.60691528 | 9.779306621 | 0.000200898 | 7.117776135 |
| SIL1         | NM_001037633 | 129.0132262 | 5.306961268 | 1.90E-10    | 24.31018801 |
| ARHGAP1      | NM_004308    | 72.27853228 | 7.362549577 | 4.89E-05    | 9.817052032 |
| RRAS2        | NM_001177315 | 56.29754319 | 2.036830435 | 4.37E-05    | 27.63977905 |
| RBM17        | NM_032905    | 140.9624333 | 6.329650614 | 1.87E-11    | 22.27017602 |
| MYH9         | NM_002473    | 140.5252827 | 12.35486155 | 6.60E-10    | 11.37408802 |
| SH3PXD2B     | NM_001017995 | 56.29754319 | 7.10146905  | 0.001143961 | 7.92759115  |
| GPAM         | NM_020918    | 107.737716  | 0.249937341 | 7.15E-16    | 431.0589035 |
| CCZ1B        | NM_198097    | 91.31957618 | 5.288848433 | 1.15E-07    | 17.26643849 |
| PLAA         | NM_001031689 | 41.67671904 | 1.329468425 | 0.000677782 | 31.34840831 |
| SOX18        | NM_018419    | 99.28571429 | 21.4425258  | 0.000183753 | 4.630318051 |
| RNASEH2B-AS1 | NR_046552    | 43.91118534 | 5.42851281  | 0.004125773 | 8.088989908 |
| FTSJ3        | NM_017647    | 202.6032105 | 38.20626385 | 2.28E-09    | 5.302879425 |
| MDN1         | NM_014611    | 62.07792787 | 3.273483624 | 1.77E-05    | 18.96387305 |
| TTL          | NM_153712    | 60.28061224 | 4.014917213 | 0.000134449 | 15.0141607  |
| FKBP1B       | NM_004116    | 62.95222924 | 8.302765391 | 0.000226176 | 7.582079737 |
| VTA1         | NM_001286371 | 40.36526697 | 3.706039221 | 0.002043391 | 10.89175385 |
| SLC34A2      | NM_001177999 | 34.58488231 | 2.143177915 | 0.004508696 | 16.13719611 |
| MTIF2        | NM_001005369 | 43.03688397 | 3.148980737 | 0.000882604 | 13.66692513 |
| UTP15        | NM_032175    | 60.76647581 | 1.838828601 | 4.78E-06    | 33.04629685 |
| TACO1        | NM_016360    | 200.8058948 | 17.31540683 | 1.23E-13    | 11.59694928 |
| RAB3B        | NM_002867    | 65.18669554 | 4.236308405 | 4.90E-05    | 15.38761802 |
| USP36        | NM_025090    | 85.1507537  | 13.04532113 | 5.72E-05    | 6.527302231 |
| RIMS3        | NM_014747    | 51.44017277 | 8.721686213 | 0.003024294 | 5.897961875 |
| PLK1         | NM_005030    | 69.1697646  | 12.29755184 | 0.000791696 | 5.624677617 |
| NCAPG        | NM_022346    | 48.33140508 | 2.743802277 | 0.000232741 | 17.61475507 |
| MYSM1        | NM_001085487 | 129.0132262 | 2.117808254 | 9.24E-13    | 60.91827526 |
| ERN1         | NM_001433    | 92.67974111 | 9.647021316 | 1.57E-06    | 9.607083687 |
| CERS6        | NM_001256126 | 89.57097344 | 2.270487846 | 7.95E-08    | 39.45010039 |
| PRMT7        | NM_001290018 | 111.7207851 | 5.857653492 | 2.70E-09    | 19.0726176  |
| SSBP3        | NM_145716    | 70.04406598 | 6.684482304 | 1.87E-05    | 10.47860744 |
| SNRNP27      | NM_006857    | 94.42834386 | 6.877462548 | 1.33E-07    | 13.73011386 |
| ARVCF        | NM_001670    | 73.58998434 | 15.99793088 | 0.001188746 | 4.599968889 |
| ZNF131       | NR_123720    | 87.33650713 | 1.628458153 | 1.62E-08    | 53.63141016 |
| RNF25        | NM_022453    | 74.51299858 | 9.818618783 | 5.35E-05    | 7.588949142 |
| OSMR-AS1     | NR_109951    | 54.11178977 | 1.868858541 | 9.74E-05    | 28.95445995 |
| SLC20A1      | NM_005415    | 218.9726375 | 11.64168639 | 1.41E-17    | 18.80935718 |
| POMGNT2      | NM_032806    | 104.6289483 | 4.972827066 | 3.98E-09    | 21.04013409 |
| PSMD3        | NM_002809    | 78.49606764 | 14.94990469 | 0.000580379 | 5.250606561 |
| RPL32        | NM_001007073 | 123.2328415 | 20.81602782 | 1.46E-06    | 5.920094003 |
| TGFBRAP1     | NM_004257    | 52.31447414 | 1.09662286  | 1.14E-05    | 47.70507352 |
| TRIM37       | NM_001005207 | 101.9573313 | 3.663025786 | 3.15E-09    | 27.83418333 |
| YWHAQ        | NM_006826    | 157.3805731 | 7.187362327 | 1.36E-12    | 21.89684699 |
| C4orf36      | NM_144645    | 84.66489013 | 2.244144664 | 5.13E-09    | 37.72701979 |
| VPS4B        | NM_004869    | 97.53711154 | 4.025992864 | 2.89E-08    | 24.2268466  |
| HEMK1        | NM_016173    | 72.27853228 | 16.7440131  | 0.001561903 | 4.316679153 |
| QRICH1       | NM_198880    | 95.78850885 | 7.61948898  | 4.33E-07    | 12.57151354 |
| SNAPC5       | NM_006049    | 62.07792787 | 14.28278038 | 0.00474227  | 4.346347574 |
| LINC00630    | NR_038988    | 30.16466256 | 0.934515388 | 0.001869095 | 32.27840114 |
| ZZZ3         | NM_015534    | 51.44017277 | 2.702833958 | 0.000184584 | 19.03193965 |
| SERAC1       | NR_073096    | 73.58998434 | 3.24304962  | 9.44E-07    | 22.69159987 |
| COPS2        | NM_004236    | 53.23748838 | 1.996671356 | 4.50E-05    | 26.6631202  |

|           |              |             |             |             |             |
|-----------|--------------|-------------|-------------|-------------|-------------|
| IDE       | NM_004969    | 139.6509813 | 3.239007983 | 9.42E-13    | 43.11535569 |
| TRAM2     | NM_012288    | 112.1579357 | 9.908203991 | 1.38E-07    | 11.31970393 |
| MTOR      | NM_004958    | 91.75672686 | 3.809681838 | 4.07E-08    | 24.08514169 |
| MRPS6     | NM_032476    | 105.5032497 | 4.329216544 | 1.01E-08    | 24.37005601 |
| TRIM72    | NM_001008274 | 66.49814761 | 13.94438287 | 0.001400297 | 4.768812518 |
| LOC728323 | NR_024437    | 56.29754319 | 1.098396912 | 2.90E-06    | 51.2542803  |
| TAT       | NM_000353    | 23.50997651 | 0.230885641 | 0.001751135 | 101.8251999 |
| EMB       | NM_198449    | 58.09485881 | 0.948476781 | 1.52E-06    | 61.2506916  |
| FAM43A    | NM_153690    | 150.2887363 | 11.43570919 | 3.30E-11    | 13.1420565  |
| COMMD3    | NM_012071    | 108.6120173 | 4.332173473 | 7.02E-10    | 25.0710222  |
| GID8      | NM_017896    | 98.8485636  | 9.210206334 | 2.33E-07    | 10.73250262 |
| ARHGAP10  | NM_024605    | 54.98609113 | 1.767311367 | 0.000110043 | 31.11284867 |
| ATAD1     | NM_032810    | 53.67463907 | 3.151468353 | 8.90E-05    | 17.03162877 |
| SORBS3    | NM_001018003 | 112.5950864 | 20.11793447 | 7.26E-06    | 5.59675182  |
| IL17RB    | NM_018725    | 91.31957618 | 8.601931121 | 2.95E-06    | 10.61617152 |
| SS18L1    | NM_198935    | 74.02713503 | 10.80369158 | 0.000138272 | 6.852022247 |
| DNAJC5    | NM_025219    | 48.76855577 | 7.500696763 | 0.004931357 | 6.501870067 |
| CRYBA1    | NM_005208    | 48.33140508 | 6.675636037 | 0.002653447 | 7.239970067 |
| SEMA3G    | NM_020163    | 109.4863187 | 16.88697873 | 4.34E-06    | 6.483475847 |
| TSPAN5    | NM_005723    | 53.67463907 | 4.308953452 | 0.000549494 | 12.45653722 |
| R3HDM4    | NM_138774    | 137.8536657 | 17.22673342 | 2.69E-08    | 8.002310265 |
| ID2       | NM_002166    | 153.3975041 | 20.97317197 | 2.17E-08    | 7.313986855 |
| PARP4     | NM_006437    | 97.53711154 | 2.81181218  | 7.58E-09    | 34.6883452  |
| ANGEL1    | NM_015305    | 90.00812411 | 3.690524015 | 6.61E-08    | 24.38898209 |
| KIF15     | NM_020242    | 66.06099693 | 2.847065898 | 7.84E-06    | 23.20318506 |
| TAF7      | NM_005642    | 121.9213894 | 7.96342609  | 2.98E-09    | 15.31016777 |
| DMWD      | NM_004943    | 125.4673077 | 24.2393652  | 4.56E-06    | 5.176179603 |
| POM121C   | NM_001099415 | 82.91628738 | 7.705726102 | 7.67E-06    | 10.76034708 |
| ZNF326    | NM_182975    | 136.5422136 | 1.257156578 | 1.38E-16    | 108.6119391 |
| NRBF2     | NM_001282405 | 62.07792787 | 4.188583683 | 4.69E-05    | 14.82074433 |
| MIPEP     | NM_005932    | 97.09996085 | 1.006691718 | 3.56E-10    | 96.45451443 |
| EED       | NM_152991    | 110.4093329 | 4.008123785 | 1.11E-09    | 27.546388   |
| TMEM185B  | NM_024121    | 82.91628738 | 13.8403212  | 8.85E-05    | 5.99092219  |
| C19orf68  | NM_199341    | 101.5201806 | 14.45231377 | 2.03E-06    | 7.024493255 |
| SLC35E1   | NM_024881    | 130.7618289 | 7.875025603 | 1.22E-10    | 16.60462271 |
| TMEM170A  | NM_145254    | 140.5252827 | 6.825532834 | 7.22E-12    | 20.58817767 |
| SLCO4A1   | NM_016354    | 133.4334458 | 20.55026552 | 2.63E-07    | 6.493027825 |
| CFAP43    | NM_025145    | 149.8515857 | 5.262917492 | 1.94E-12    | 28.47310183 |
| ASXL2     | NM_018263    | 104.1917976 | 3.505531544 | 3.25E-09    | 29.72211098 |
| C12orf10  | NM_021640    | 73.58998434 | 13.52287998 | 0.000580953 | 5.441886967 |
| PCDHGA10  | NM_032090    | 47.8942544  | 5.329864374 | 0.00197955  | 8.986017475 |
| ZBTB2     | NM_020861    | 104.1917976 | 10.05951571 | 4.37E-07    | 10.35753615 |
| PIAS2     | NM_173206    | 105.066099  | 0.786960253 | 1.24E-11    | 133.5087745 |
| DCUN1D5   | NM_032299    | 105.9404003 | 2.591162264 | 3.41E-10    | 40.88528218 |
| EPS8      | NM_004447    | 75.82445064 | 3.077890977 | 8.21E-07    | 24.63519703 |
| YARS      | NM_003680    | 145.8685166 | 6.430305365 | 1.11E-11    | 22.68453959 |
| FAM214A   | NR_104457    | 52.31447414 | 0.91956185  | 1.33E-05    | 56.890653   |
| GATA2-AS1 | NR_125398    | 118.375471  | 17.53573661 | 1.04E-06    | 6.750527432 |
| KMT2E     | NM_182931    | 136.9793643 | 4.981453682 | 1.96E-11    | 27.4978697  |
| FBXO30    | NM_032145    | 94.86549455 | 3.404611787 | 1.24E-08    | 27.86382133 |
| CRTC1     | NM_015321    | 56.29754319 | 11.03159198 | 0.003358886 | 5.103301798 |
| FBXO11    | NM_001190274 | 81.55612244 | 3.143511014 | 1.97E-07    | 25.94427762 |
| NOL6      | NM_022917    | 91.75672686 | 13.82357348 | 3.45E-05    | 6.637699505 |
| ADPRHL2   | NM_017825    | 139.2138305 | 19.07816287 | 6.43E-08    | 7.297024953 |
| DDX60     | NM_017631    | 65.62384623 | 2.957462428 | 8.26E-06    | 22.18924089 |
| RIPK2     | NM_003821    | 106.4262639 | 2.948482345 | 2.82E-10    | 36.09526916 |
| SH3BP1    | NM_018957    | 98.41141291 | 16.09311871 | 1.56E-05    | 6.115123778 |
| NFRKB     | NM_001143835 | 86.89935644 | 5.343089067 | 4.81E-07    | 16.26387944 |
| TUBGCP6   | NM_020461    | 112.5950864 | 11.72219727 | 3.44E-07    | 9.60528848  |
| C16orf74  | NM_206967    | 115.2667034 | 11.22277126 | 6.45E-08    | 10.27078791 |
| KEAP1     | NM_203500    | 139.6509813 | 16.80656907 | 1.57E-08    | 8.309309336 |
| NECAP1    | NR_024260    | 77.13590271 | 4.158432474 | 1.10E-06    | 18.54927384 |

|              |              |             |             |             |             |
|--------------|--------------|-------------|-------------|-------------|-------------|
| COX8A        | NM_004074    | 136.1050629 | 24.01551132 | 1.38E-06    | 5.66738143  |
| MED11        | NM_001001683 | 179.5303847 | 17.83613153 | 3.00E-11    | 10.06554501 |
| SNRPF        | NM_003095    | 105.066099  | 5.3385753   | 7.74E-09    | 19.68055016 |
| TOB1-AS1     | NR_038458    | 97.53711154 | 22.88792921 | 0.000631971 | 4.261508792 |
| CRYM-AS1     | NR_026675    | 34.58488231 | 1.248670383 | 0.002907458 | 27.69736735 |
| CLCN3        | NM_001829    | 72.27853228 | 3.481761663 | 2.51E-06    | 20.75918437 |
| ENPP5        | NM_001290072 | 107.737716  | 3.259254877 | 9.11E-11    | 33.05593458 |
| PHYH         | NM_001037537 | 54.11178977 | 3.820376695 | 0.000298597 | 14.16399326 |
| SDCCAG8      | NM_006642    | 62.51507855 | 1.264879284 | 1.59E-06    | 49.42375082 |
| STX18-AS1    | NR_037888    | 129.0132262 | 4.668370378 | 1.56E-10    | 27.63560208 |
| ZSCAN21      | NM_145914    | 78.49606764 | 7.802147351 | 1.11E-05    | 10.06082866 |
| ZNF41        | NM_153380    | 63.38937993 | 2.664063976 | 8.58E-06    | 23.79424087 |
| CPNE7        | NM_014427    | 123.2328415 | 24.40418081 | 5.05E-06    | 5.049661056 |
| HRSP12       | NM_005836    | 122.7956908 | 4.192215664 | 9.60E-12    | 29.29135824 |
| OGFRP1       | NR_036498    | 58.5320095  | 12.5466594  | 0.00412773  | 4.665146922 |
| RPS4X        | NM_001007    | 69.60691528 | 12.04177484 | 0.001033778 | 5.780453147 |
| NAMPT        | NM_005746    | 48.76855577 | 3.136354784 | 0.000256722 | 15.54943848 |
| PPP1R13B     | NM_015316    | 109.9234694 | 4.184469833 | 7.47E-09    | 26.26938986 |
| ZNF264       | NM_003417    | 110.8464837 | 3.445052987 | 7.30E-10    | 32.17555263 |
| ZBTB17       | NM_001287603 | 106.377551  | 12.33871833 | 1.23E-06    | 8.621442533 |
| HSPA4L       | NM_014278    | 84.71360301 | 4.376443154 | 5.95E-07    | 19.35672418 |
| MOSPD1       | NM_019556    | 49.64285714 | 2.871570921 | 0.000211319 | 17.28770018 |
| COL6A1       | NM_001848    | 138.2908163 | 15.04519561 | 9.22E-09    | 9.191692807 |
| C10orf54     | NM_022153    | 83.79058876 | 10.25301938 | 2.29E-05    | 8.172284247 |
| HIC2         | NM_015094    | 95.73979591 | 9.784064335 | 1.53E-06    | 9.785278657 |
| NCOR2        | NM_006312    | 81.11897176 | 10.67669874 | 6.03E-05    | 7.597757857 |
| LARP1B       | NM_178043    | 87.33650713 | 3.511454409 | 4.39E-08    | 24.87188981 |
| MKKS         | NR_072977    | 115.2667034 | 4.769936423 | 6.05E-10    | 24.16524942 |
| ZNF445       | NM_181489    | 90.8824255  | 6.992624954 | 1.01E-06    | 12.99689689 |
| TTC37        | NM_014639    | 59.40631088 | 2.500863888 | 2.62E-05    | 23.75431592 |
| LRR1         | NM_203467    | 103.3174962 | 9.601954258 | 2.48E-07    | 10.76004878 |
| SEC62        | NM_003262    | 83.35343807 | 2.601202967 | 5.65E-08    | 32.04418845 |
| TP53RK       | NM_033550    | 61.2036265  | 4.961558457 | 8.97E-05    | 12.33556493 |
| PTK2         | NM_001199649 | 165.7838619 | 5.017166948 | 1.23E-13    | 33.04332178 |
| IAH1         | NM_001039613 | 62.07792787 | 7.090793573 | 0.000204742 | 8.754722194 |
| FRS3         | NM_006653    | 67.37244898 | 9.30924303  | 0.000199192 | 7.23715653  |
| KTI12        | NM_138417    | 98.41141291 | 15.05115418 | 4.92E-05    | 6.53846288  |
| SRD5A1       | NM_001047    | 81.11897176 | 3.430115338 | 1.90E-07    | 23.64905077 |
| ZNF275       | NM_001080485 | 66.93529829 | 2.208120329 | 1.53E-06    | 30.31324762 |
| SDHAP2       | NR_003265    | 80.73053395 | 14.62902561 | 0.000151866 | 5.518517508 |
| TDP2         | NM_016614    | 114.8295527 | 3.037923243 | 4.84E-11    | 37.79870113 |
| RILPL2       | NM_145058    | 55.86039251 | 8.421330244 | 0.000872538 | 6.633202937 |
| KDM4B        | NM_015015    | 175.9844663 | 11.66642197 | 6.22E-13    | 15.08469921 |
| AKTIP        | NM_022476    | 77.57305339 | 2.776309769 | 3.11E-07    | 27.9410656  |
| CD40         | NM_001250    | 69.1697646  | 6.842754161 | 4.89E-05    | 10.10846846 |
| SMURF2       | NM_022739    | 261.9608085 | 6.383914595 | 3.69E-22    | 41.03451019 |
| KTN1-AS1     | NR_027123    | 55.86039251 | 9.541195266 | 0.002692798 | 5.854653526 |
| CALM1        | NM_006888    | 189.7309891 | 16.72265378 | 1.37E-12    | 11.34574641 |
| TMEM128      | NM_001297551 | 129.8875276 | 4.158469626 | 8.86E-12    | 31.23445383 |
| LARS         | NM_020117    | 47.8942544  | 1.431321203 | 0.00023991  | 33.46156984 |
| KDM1A        | NM_001009999 | 56.78340675 | 4.535929492 | 0.000269688 | 12.51858232 |
| TMEM206      | NM_001198862 | 61.2036265  | 6.565488242 | 0.000155209 | 9.322022101 |
| ADA          | NM_000022    | 74.02713503 | 8.948862177 | 3.46E-05    | 8.272239931 |
| SIAH2        | NM_005067    | 61.64077717 | 5.935345913 | 6.01E-05    | 10.38537232 |
| TSR1         | NM_018128    | 76.69875203 | 13.98135994 | 0.000193002 | 5.485786243 |
| IRAK1        | NM_001025242 | 63.38937993 | 12.34892446 | 0.002045189 | 5.133190357 |
| PHF11        | NM_001040443 | 58.96916018 | 5.409928602 | 0.0001286   | 10.90017346 |
| TTLL3        | NM_001025930 | 90.4452748  | 12.22637283 | 1.63E-05    | 7.397555765 |
| LOC100505938 | NR_125740    | 84.66489013 | 2.13265146  | 7.04E-08    | 39.69935629 |
| GCN1L1       | NM_006836    | 133.4334458 | 8.158399273 | 2.55E-10    | 16.35534636 |
| KLHL11       | NM_018143    | 121.9213894 | 8.689294612 | 1.47E-09    | 14.03121828 |
| MBLAC2       | NM_203406    | 90.8824255  | 6.636335745 | 4.40E-07    | 13.69466962 |



|              |              |             |             |             |             |
|--------------|--------------|-------------|-------------|-------------|-------------|
| MRPL54       | NM_172251    | 135.6679122 | 7.790661585 | 6.75E-11    | 17.4141709  |
| AP3B1        | NM_003664    | 76.26160134 | 2.280901288 | 8.73E-07    | 33.43485391 |
| LRRRC61      | NM_023942    | 66.06099693 | 7.494950243 | 0.000122018 | 8.814067443 |
| USP37        | NM_020935    | 108.1748666 | 5.495037031 | 8.64E-09    | 19.68592132 |
| SESTD1       | NM_178123    | 69.60691528 | 2.377433239 | 4.78E-06    | 29.27817872 |
| CASP6        | NM_001226    | 86.46220574 | 3.35491779  | 8.28E-08    | 25.77178076 |
| PAFAH1B1     | NM_000430    | 186.6222214 | 6.99990326  | 8.52E-15    | 26.66068579 |
| TIMP1        | NM_003254    | 49.20570646 | 4.557923259 | 0.001099701 | 10.79564171 |
| SGCB         | NM_000232    | 109.4863187 | 1.181600069 | 7.85E-13    | 92.65937062 |
| DAGLA        | NM_006133    | 70.04406598 | 14.72575741 | 0.000772184 | 4.756567967 |
| RPS9         | NM_001013    | 183.076303  | 31.49211271 | 5.68E-09    | 5.813401746 |
| PHC1         | NM_004426    | 60.28061224 | 2.734343105 | 1.31E-05    | 22.0457382  |
| DOHH         | NM_031304    | 146.742818  | 14.54090442 | 1.46E-09    | 10.09172564 |
| KCTD21       | NM_001029859 | 47.8942544  | 7.25333507  | 0.004078631 | 6.603066581 |
| KLF3         | NM_016531    | 94.42834386 | 5.735754998 | 9.00E-08    | 16.46310623 |
| ZNF777       | NM_015694    | 97.97426223 | 6.912681811 | 2.52E-07    | 14.17311905 |
| ESYT2        | NM_020728    | 101.5201806 | 4.61919179  | 2.41E-08    | 21.97790982 |
| PMS2P3       | NR_028059    | 72.27853228 | 3.418196939 | 4.92E-06    | 21.14522176 |
| GMFB         | NM_004124    | 107.3005653 | 4.128781282 | 3.61E-10    | 25.98843531 |
| STAT5B       | NM_012448    | 105.9404003 | 3.738652909 | 1.25E-09    | 28.33651663 |
| DPY19L4      | NM_181787    | 149.414435  | 0.883221298 | 1.28E-15    | 169.1698733 |
| PPP4R1       | NM_001042388 | 67.37244898 | 2.872923184 | 3.64E-06    | 23.45083549 |
| PRPF8        | NM_006445    | 101.5688934 | 11.13511131 | 5.39E-07    | 9.121497811 |
| RUNDC1       | NM_173079    | 76.26160134 | 9.87323745  | 4.59E-05    | 7.724072446 |
| EXOSC7       | NR_023353    | 72.27853228 | 6.249817379 | 1.27E-05    | 11.56490308 |
| ERI3         | NM_024066    | 70.04406598 | 9.120753415 | 8.04E-05    | 7.679635967 |
| SLC7A5P2     | NR_002594    | 230.5334067 | 27.10277073 | 3.60E-13    | 8.505898126 |
| USP14        | NM_005151    | 73.15283366 | 1.488648893 | 4.72E-07    | 49.14042123 |
| BRIX1        | NM_018321    | 81.60483533 | 3.999250938 | 1.06E-07    | 20.40502999 |
| ARGLU1       | NM_018011    | 61.2036265  | 3.589705503 | 8.72E-05    | 17.04976257 |
| KCNJ12       | NM_021012    | 58.5320095  | 10.07629972 | 0.003112659 | 5.808879362 |
| TRAM2-AS1    | NR_103447    | 151.1630377 | 1.289442398 | 2.95E-19    | 117.2313226 |
| SNRPD1       | NM_006938    | 164.9095605 | 7.068411418 | 1.32E-13    | 23.33049829 |
| PBX4         | NR_038198    | 47.8942544  | 6.109597556 | 0.001555996 | 7.83918318  |
| WDFY3        | NM_014991    | 112.1579357 | 1.175641519 | 2.96E-11    | 95.40147558 |
| SMIM8        | NM_001042493 | 90.4452748  | 1.380938728 | 4.35E-10    | 65.49550169 |
| PLEKHA3      | NM_019091    | 56.78340675 | 2.46167724  | 2.22E-05    | 23.06695851 |
| C5orf30      | NM_033211    | 104.1917976 | 4.115333432 | 3.23E-09    | 25.31794794 |
| ABRACL       | NM_021243    | 58.09485881 | 5.257076367 | 0.000147138 | 11.05079226 |
| HIF1AN       | NM_017902    | 168.4554789 | 12.56301381 | 1.81E-12    | 13.40884293 |
| C17orf85     | NM_001114118 | 159.1778887 | 7.120966177 | 5.54E-13    | 22.3534117  |
| PRKRIR       | NM_004705    | 50.5658714  | 2.382627706 | 0.000103493 | 21.2227329  |
| PKN2         | NM_006256    | 97.09996085 | 3.483815228 | 1.17E-08    | 27.87173099 |
| MANBA        | NM_005908    | 83.35343807 | 3.816095278 | 2.38E-07    | 21.84259878 |
| ZDHHC1       | NM_013304    | 82.04198601 | 14.58677492 | 8.11E-05    | 5.624408854 |
| LOC101928489 | NR_110889    | 78.93321834 | 3.015843852 | 1.75E-07    | 26.17284654 |
| SLC46A1      | NM_080669    | 69.1697646  | 15.15748821 | 0.00221219  | 4.563405468 |
| SEH1L        | NM_001013437 | 93.99119317 | 3.523000763 | 5.77E-08    | 26.67929969 |
| PRKCA        | NM_002737    | 116.1897176 | 4.528688431 | 2.08E-09    | 25.65637256 |
| KCNE3        | NM_005472    | 35.45918367 | 2.341931276 | 0.003510789 | 15.14100095 |
| PARD6G       | NM_032510    | 108.6120173 | 4.717188587 | 7.00E-09    | 23.02473503 |
| AP5Z1        | NM_014855    | 65.18669554 | 13.560155   | 0.001659851 | 4.807223481 |
| PGM2         | NM_018290    | 147.1799686 | 1.492853487 | 5.03E-16    | 98.5896941  |
| SLC38A6      | NR_033344    | 54.54894044 | 1.250842795 | 7.42E-05    | 43.60974909 |
| TIMMDC1      | NM_016589    | 71.8413816  | 3.785991696 | 7.08E-06    | 18.97557823 |
| TRIP4        | NM_016213    | 90.00812411 | 3.203232796 | 2.35E-08    | 28.09915165 |
| IGF2BP2      | NM_001291869 | 88.2108085  | 5.411547547 | 5.77E-07    | 16.3004774  |
| TMEM251      | NM_001098621 | 83.79058876 | 16.59300005 | 0.000876166 | 5.049755229 |
| PRRC2C       | NM_015172    | 64.74954487 | 3.238775682 | 8.62E-06    | 19.99198192 |
| USP31        | NM_020718    | 109.4863187 | 1.621078136 | 2.82E-10    | 67.53919891 |
| HSPA4        | NM_002154    | 99.7715779  | 6.44984771  | 3.72E-08    | 15.46882692 |
| C14orf132    | NM_001282463 | 90.8824255  | 4.320150936 | 1.80E-07    | 21.03686349 |

|              |              |             |             |             |             |
|--------------|--------------|-------------|-------------|-------------|-------------|
| CYSTM1       | NM_032412    | 54.11178977 | 7.36191841  | 0.001852478 | 7.350229486 |
| CSTF2        | NM_001325    | 41.67671904 | 2.597765652 | 0.000644231 | 16.04329436 |
| ADNP2        | NM_014913    | 61.2036265  | 6.74059352  | 0.000526944 | 9.079857184 |
| GINS2        | NM_016095    | 114.392402  | 11.81340135 | 7.25E-08    | 9.683273985 |
| FGD6         | NM_018351    | 73.58998434 | 2.497755641 | 1.35E-06    | 29.46244345 |
| PP7080       | NR_024158    | 97.97426223 | 23.36759404 | 0.000619544 | 4.192740684 |
| CUL1         | NM_003592    | 130.3246782 | 4.57571714  | 6.23E-11    | 28.48180388 |
| ATP6V1H      | NM_015941    | 63.87524348 | 2.993511124 | 1.63E-05    | 21.33790082 |
| FUBP1        | NM_003902    | 74.51299858 | 4.241225167 | 4.87E-06    | 17.56874385 |
| FKBP4        | NM_002014    | 86.46220574 | 13.24310971 | 2.84E-05    | 6.528844631 |
| HSBP1L1      | NM_001136180 | 68.29546324 | 15.66442777 | 0.003785315 | 4.359907955 |
| RAB3GAP2     | NM_012414    | 65.18669554 | 3.37245736  | 9.02E-06    | 19.32913854 |
| SF3B3        | NM_012426    | 100.2087285 | 8.177235888 | 2.32E-07    | 12.25459677 |
| TOB2         | NM_016272    | 130.3246782 | 22.72884239 | 7.88E-07    | 5.733889828 |
| CCNL2        | NM_030937    | 129.4503768 | 17.879988   | 1.16E-07    | 7.23995882  |
| ANKRD18DP    | NR_003291    | 93.55404248 | 4.543227132 | 3.95E-08    | 20.59198006 |
| FCHSD2       | NM_014824    | 69.60691528 | 2.017196277 | 5.31E-06    | 34.50676371 |
| LOC729732    | NR_047662    | 39.05381491 | 2.115392532 | 0.002042643 | 18.46173432 |
| SLC37A3      | NM_001287498 | 87.33650713 | 4.069358141 | 3.57E-07    | 21.46198592 |
| CAMLG        | NM_001745    | 69.60691528 | 4.857668774 | 9.01E-06    | 14.32928397 |
| SDE2         | NM_152608    | 73.63869723 | 7.454808998 | 2.14E-05    | 9.878012602 |
| ALKBH3       | NM_139178    | 127.2646234 | 2.400379907 | 8.98E-13    | 53.01853387 |
| LOC100093631 | NR_003580    | 80.68182108 | 8.383427647 | 1.27E-05    | 9.623965814 |
| UMPS         | NR_033434    | 80.73053395 | 7.73028383  | 7.22E-06    | 10.44341136 |
| NSMCE4A      | NM_001167865 | 155.1948196 | 9.205776878 | 3.79E-12    | 16.85841637 |
| CNNM3        | NM_017623    | 130.3246782 | 13.24964337 | 5.06E-09    | 9.83608951  |
| TRAF1        | NM_001190945 | 60.76647581 | 8.035736065 | 0.000530075 | 7.562029828 |
| PSMD14       | NM_005805    | 133.8705966 | 3.765939891 | 3.17E-12    | 35.54772527 |
| SNRNP48      | NM_152551    | 117.5011696 | 5.27267027  | 2.12E-10    | 22.2849455  |
| FTX          | NR_028379    | 38.13080067 | 1.506878207 | 0.003831314 | 25.30450071 |
| DDX56        | NM_001257189 | 97.97426223 | 19.19628306 | 8.83E-05    | 5.103814208 |
| IFI30        | NM_006332    | 86.46220574 | 13.30153893 | 8.54E-05    | 6.500165596 |
| TOMM7        | NM_019059    | 66.49814761 | 2.980382979 | 5.88E-06    | 22.31194718 |
| PDP1         | NM_001161779 | 159.1291758 | 22.03332873 | 6.08E-09    | 7.222203133 |
| DAPK3        | NM_001348    | 72.27853228 | 15.77786216 | 0.001425942 | 4.581009235 |
| CLN5         | NM_006493    | 70.04406598 | 5.373053934 | 1.73E-05    | 13.036174   |
| TRAK2        | NM_015049    | 65.62384623 | 3.761478692 | 8.05E-06    | 17.4462895  |
| TPR          | NM_003292    | 85.58790438 | 2.442709185 | 6.38E-08    | 35.03810642 |
| PRRG4        | NM_024081    | 76.26160134 | 4.39721717  | 2.44E-06    | 17.34315099 |
| LOC100129973 | NR_102751    | 47.8942544  | 2.898219279 | 0.000204791 | 16.52540743 |
| AATF         | NM_012138    | 47.01995303 | 3.334088374 | 0.000633895 | 14.10279145 |
| KNTC1        | NM_014708    | 61.2036265  | 5.4422417   | 0.000169595 | 11.2460324  |
| YTHDF3-AS1   | NR_102684    | 147.1799686 | 24.21732297 | 3.85E-05    | 6.077466481 |
| POLB         | NM_002690    | 86.02505507 | 3.331554132 | 4.33E-08    | 25.82129891 |
| DTX3L        | NM_138287    | 41.72543191 | 3.009530964 | 0.002029454 | 13.86443018 |
| WDR37        | NM_014023    | 56.73469387 | 3.551095235 | 5.17E-05    | 15.97667484 |
| ECHDC2       | NM_001198962 | 58.96916018 | 4.749100819 | 0.00010668  | 12.41691058 |
| RNF149       | NM_173647    | 78.93321834 | 4.12143535  | 1.40E-06    | 19.1518759  |
| GXYLT1       | NM_173601    | 59.40631088 | 3.446868524 | 2.57E-05    | 17.23486419 |
| C7orf73      | NM_001130929 | 117.9383204 | 5.49587789  | 5.24E-10    | 21.45941427 |
| PYROXD1      | NM_024854    | 53.18877551 | 1.319070425 | 3.30E-05    | 40.32292325 |
| CKAP2L       | NM_152515    | 50.5658714  | 5.68073646  | 0.00072268  | 8.90128802  |
| FANCE        | NM_021922    | 104.6289483 | 7.095690012 | 1.58E-08    | 14.74542266 |
| SHCBP1       | NM_024745    | 143.6340504 | 1.245475973 | 1.89E-15    | 115.3246257 |
| LIM2         | NM_001161748 | 55.86039251 | 6.770168817 | 0.000431634 | 8.25096006  |
| ELMSAN1      | NM_001043318 | 130.3246782 | 10.99595047 | 2.86E-09    | 11.85206122 |
| LINC00476    | NR_023389    | 164.4724099 | 9.255554692 | 3.79E-13    | 17.77012997 |
| ZNF184       | NM_007149    | 65.62384623 | 5.521753709 | 3.09E-05    | 11.88460219 |
| PEL1         | NM_020651    | 76.26160134 | 3.389750854 | 5.00E-07    | 22.49770105 |
| ANKRD34A     | NM_001039888 | 61.64077717 | 11.99107139 | 0.001332424 | 5.140556266 |
| PDIA3        | NM_005313    | 92.24259043 | 5.501077927 | 1.15E-07    | 16.76809375 |
| SAP30L       | NM_001131063 | 66.06099693 | 6.652931978 | 0.000112528 | 9.929606547 |

|              |              |             |             |             |             |
|--------------|--------------|-------------|-------------|-------------|-------------|
| C6orf106     | NM_022758    | 86.46220574 | 4.838353695 | 8.90E-07    | 17.87017056 |
| CAMSAP3      | NM_001080429 | 84.22773945 | 15.83754632 | 0.000238016 | 5.318231607 |
| VPS9D1-AS1   | NR_036480    | 123.2815543 | 24.66836389 | 1.16E-05    | 4.997556988 |
| FBXO5        | NM_012177    | 41.72543191 | 5.063561332 | 0.00305992  | 8.240333073 |
| ZNF503       | NR_120651    | 90.00812411 | 6.813267621 | 3.10E-07    | 13.21071314 |
| FAM133DP     | NR_034169    | 150.7258871 | 3.628904505 | 4.69E-14    | 41.53481771 |
| N4BP2        | NM_018177    | 125.9044585 | 2.124003533 | 1.00E-11    | 59.27695342 |
| MFAP1        | NM_005926    | 46.58280234 | 6.256583403 | 0.002213283 | 7.445405798 |
| MTM1         | NM_000252    | 66.06099693 | 1.136486297 | 4.98E-07    | 58.12740295 |
| CCT6P3       | NR_033416    | 88.2108085  | 3.331507889 | 2.47E-08    | 26.47774264 |
| NUDC         | NM_006600    | 115.2667034 | 10.14633881 | 4.00E-08    | 11.36042325 |
| SLC9A1       | NM_003047    | 223.8787208 | 12.28323852 | 1.82E-16    | 18.22635948 |
| LOC102723373 | NR_119378    | 30.16466256 | 1.453884479 | 0.00456051  | 20.74763366 |
| C3orf38      | NM_173824    | 54.11178977 | 6.554063563 | 0.0008102   | 8.256219862 |
| MSX1         | NM_002448    | 222.0814051 | 34.23768662 | 1.56E-11    | 6.486460595 |
| BUD13        | NM_032725    | 101.0830299 | 4.368836561 | 1.09E-08    | 23.13728804 |
| ME1          | NM_002395    | 109.049168  | 1.072942013 | 3.93E-11    | 101.6356585 |
| C15orf61     | NM_001143936 | 120.6099374 | 11.85017822 | 2.14E-08    | 10.17790072 |
| NHP2L1       | NM_001003796 | 82.4791367  | 7.120890255 | 2.86E-06    | 11.58270016 |
| PRPF19       | NM_014502    | 95.3513581  | 9.092967563 | 1.43E-06    | 10.48627496 |
| C5orf24      | NM_001135586 | 257.1034381 | 9.869639285 | 6.28E-22    | 26.04993259 |
| CCNF         | NM_001761    | 150.2887363 | 22.37229739 | 1.27E-08    | 6.717626434 |
| ALDH1A3      | NM_001293815 | 100.6458792 | 10.14089255 | 9.31E-07    | 9.924755511 |
| NAB1         | NM_005966    | 80.2446704  | 3.889054317 | 1.68E-06    | 20.6334661  |
| UBE2Q2P1     | NR_003661    | 71.8413816  | 1.644432751 | 7.90E-07    | 43.68763731 |
| PCYOX1       | NM_016297    | 87.33650713 | 7.106072552 | 1.28E-06    | 12.29040465 |
| SRBD1        | NM_018079    | 50.5658714  | 3.116169304 | 0.000204071 | 16.22693329 |
| OSER1        | NM_016470    | 42.11386972 | 3.442001668 | 0.002737795 | 12.23528452 |
| RSL1D1       | NM_015659    | 86.46220574 | 8.707022725 | 8.89E-06    | 9.930168839 |
| YIPF2        | NM_024029    | 66.93529829 | 11.50066035 | 0.000827741 | 5.820126517 |
| BCAM         | NM_001013257 | 86.89935644 | 18.10606517 | 0.000309357 | 4.799461154 |
| TNFRSF1A     | NM_001065    | 87.77365781 | 18.40696647 | 0.000196984 | 4.768502076 |
| KCNN4        | NM_002250    | 59.84346156 | 13.50752172 | 0.004145127 | 4.430380555 |
| FAM73B       | NM_032809    | 62.95222924 | 12.31622966 | 0.001133886 | 5.111323106 |
| PSEN2        | NM_000447    | 75.82445064 | 9.368780378 | 6.62E-05    | 8.093310717 |
| SCAF8        | NM_014892    | 112.1579357 | 4.565838221 | 4.02E-09    | 24.5645882  |
| SLC4A1AP     | NM_018158    | 130.7618289 | 6.39483687  | 1.54E-10    | 20.448032   |
| STARD4       | NM_139164    | 59.40631088 | 2.361879469 | 5.01E-06    | 25.15213484 |
| PCF11        | NM_015885    | 60.32932513 | 7.891099521 | 0.000538192 | 7.645236885 |
| GSTCD        | NM_024751    | 98.41141291 | 2.279049492 | 8.77E-09    | 43.18090207 |
| HIGD2B       | NR_002780    | 54.54894044 | 2.063777188 | 1.18E-05    | 26.43160355 |
| GPR137C      | NM_001099652 | 80.68182108 | 2.632565825 | 3.07E-07    | 30.64759875 |
| ZDHHC5       | NM_015457    | 139.6509813 | 4.984824071 | 2.23E-12    | 28.01522768 |
| SMG9         | NM_019108    | 83.79058876 | 10.75848902 | 2.24E-05    | 7.788323118 |
| KIAA1147     | NM_001080392 | 55.42324183 | 5.022930089 | 0.000454471 | 11.03404603 |
| JUP          | NM_021991    | 145.8685166 | 12.77286194 | 4.92E-10    | 11.4201905  |
| DDX60L       | NM_001012967 | 43.91118534 | 4.377000754 | 0.004861181 | 10.03225446 |
| SNX8         | NM_013321    | 81.11897176 | 7.368684799 | 1.29E-05    | 11.00860927 |
| SDHA         | NM_001294332 | 44.34833603 | 5.502610697 | 0.002517043 | 8.059508199 |
| INAFM2       | NM_001301268 | 44.78548671 | 2.529694653 | 0.000471035 | 17.7039101  |
| RPL23        | NM_000978    | 162.2379435 | 35.78536297 | 1.06E-06    | 4.533639734 |
| CCDC88A      | NM_001254943 | 77.57305339 | 2.865006234 | 7.46E-07    | 27.07605047 |
| PEX12        | NM_000286    | 86.89935644 | 8.087786522 | 2.55E-06    | 10.74451659 |
| MPLKIP       | NM_138701    | 75.82445064 | 17.85689534 | 0.00270704  | 4.246228092 |
| MYO5B        | NM_001080467 | 57.65770813 | 2.587547214 | 6.31E-05    | 22.28276563 |
| TBCE         | NM_001287801 | 69.1697646  | 4.266200793 | 2.70E-05    | 16.21343391 |
| RIC1         | NM_001206557 | 143.1968996 | 3.494025965 | 6.69E-13    | 40.98335302 |
| PIGZ         | NM_025163    | 87.77365781 | 8.896753543 | 6.21E-06    | 9.865807498 |
| BDP1         | NM_018429    | 99.7715779  | 4.323715263 | 4.47E-08    | 23.07542746 |
| GLOD4        | NM_016080    | 71.8413816  | 6.606074111 | 4.54E-05    | 10.87504929 |
| RND1         | NM_014470    | 97.09996085 | 18.11940611 | 3.07E-05    | 5.358893126 |
| UBE2V2       | NM_003350    | 136.9793643 | 4.572121215 | 8.61E-12    | 29.95969656 |

|                |              |             |             |             |             |
|----------------|--------------|-------------|-------------|-------------|-------------|
| EPB4IL5        | NM_001184937 | 84.71360301 | 2.197562537 | 1.15E-07    | 38.54889295 |
| PPIL3          | NM_130906    | 87.77365781 | 5.335345703 | 1.32E-07    | 16.45135343 |
| NOMO1          | NM_014287    | 78.93321834 | 5.464566901 | 2.48E-06    | 14.44455156 |
| WDR89          | NM_080666    | 96.66281017 | 3.506346472 | 4.59E-09    | 27.5679574  |
| EXOG           | NM_001145464 | 111.7207851 | 4.298761615 | 1.02E-09    | 25.98906268 |
| DNAJA1         | NM_001539    | 171.1270958 | 11.74508105 | 1.98E-12    | 14.5701077  |
| BLOC1S6        | NM_012388    | 105.066099  | 3.619043684 | 1.57E-09    | 29.03145365 |
| TM7SF3         | NM_016551    | 102.394482  | 4.786224116 | 1.34E-08    | 21.39358281 |
| LLPH           | NM_032338    | 114.8295527 | 9.16596146  | 1.97E-08    | 12.52782408 |
| XRCC1          | NM_006297    | 51.00302207 | 7.254455123 | 0.002787575 | 7.030579307 |
| RAPH1          | NM_203365    | 90.4452748  | 2.088341752 | 2.16E-08    | 43.30961382 |
| ACER3          | NM_001300955 | 140.0881319 | 3.480748583 | 1.34E-12    | 40.24655289 |
| MRPL16         | NM_017840    | 105.9891132 | 9.322438503 | 1.58E-07    | 11.36924778 |
| MYO1D          | NM_015194    | 51.87732345 | 0.957805235 | 2.26E-05    | 54.16270612 |
| KLHL23         | NM_144711    | 73.58998434 | 4.205274378 | 2.76E-06    | 17.49944896 |
| HYOU1          | NM_006389    | 76.69875203 | 17.67917712 | 0.001359272 | 4.338366628 |
| TFB1M          | NM_016020    | 47.8942544  | 2.783917022 | 0.000291205 | 17.20390875 |
| ARHGAP21       | NM_020824    | 67.37244898 | 1.232439769 | 3.24E-07    | 54.66591606 |
| CIR1           | NM_004882    | 43.47403467 | 3.50564302  | 0.001019883 | 12.40115848 |
| NUP133         | NM_018230    | 79.8075197  | 5.13138251  | 2.49E-06    | 15.55282997 |
| C5orf22        | NM_018356    | 51.87732345 | 4.454384214 | 0.000613903 | 11.64635132 |
| CLOCK          | NM_004898    | 123.2328415 | 3.957422854 | 3.76E-10    | 31.13966993 |
| RBM12B         | NM_203390    | 185.3107694 | 12.82526612 | 1.39E-13    | 14.44888298 |
| TNFSF9         | NM_003811    | 159.1778887 | 33.90285273 | 5.45E-07    | 4.69511784  |
| FAM207A        | NM_058190    | 109.9721823 | 9.928802808 | 1.69E-07    | 11.07607679 |
| ACSL3          | NM_004457    | 65.18669554 | 3.135071516 | 7.81E-06    | 20.79272999 |
| KPNA1          | NM_002264    | 132.1219938 | 3.879532388 | 4.89E-11    | 34.05616467 |
| AZIN2          | NM_052998    | 69.60691528 | 7.414915383 | 0.000107976 | 9.387418694 |
| HMOX1          | NM_002133    | 72.27853228 | 8.89029003  | 0.000135195 | 8.130053355 |
| APOPT1         | NM_032374    | 43.47403467 | 6.261712758 | 0.004236656 | 6.942834388 |
| MMD            | NM_012329    | 99.33442714 | 0.083740808 | 1.55E-16    | 1186.212907 |
| C2orf44        | NM_025203    | 61.64077717 | 2.571721133 | 3.83E-06    | 23.96868633 |
| WIPF2          | NM_133264    | 85.1507537  | 5.525220884 | 7.61E-07    | 15.41128499 |
| SAT1           | NM_002970    | 56.29754319 | 4.396331765 | 0.000206507 | 12.80557205 |
| FAM206A        | NM_017832    | 59.40631088 | 10.27011588 | 0.000904885 | 5.784385648 |
| ATP5H          | NM_006356    | 156.5062718 | 16.05091478 | 3.76E-10    | 9.750613838 |
| STAG1          | NM_005862    | 90.4452748  | 2.924029593 | 4.81E-08    | 30.93172348 |
| FAM118B        | NM_024556    | 53.23748838 | 3.908684048 | 8.83E-05    | 13.62030999 |
| DUSP12         | NM_007240    | 112.6437993 | 0.831953753 | 1.92E-14    | 135.3967079 |
| SCRIB          | NM_015356    | 101.5201806 | 25.31123639 | 0.000149987 | 4.010874025 |
| CDKAL1         | NM_017774    | 58.5320095  | 1.484087907 | 6.34E-05    | 39.43971864 |
| LOC101929567   | NR_110257    | 66.06099693 | 7.467596811 | 0.000159269 | 8.846352929 |
| FAM72D         | NM_207418    | 42.16258261 | 3.725717937 | 0.003035567 | 11.31663302 |
| UBTD2          | NM_152277    | 130.7618289 | 4.719910514 | 4.74E-11    | 27.70430256 |
| RANBP9         | NM_005493    | 87.77365781 | 3.432029286 | 5.63E-08    | 25.57485688 |
| MYO1E          | NM_004998    | 78.93321834 | 4.569080862 | 3.29E-06    | 17.27551355 |
| HABP4          | NM_014282    | 87.33650713 | 4.797903456 | 2.90E-07    | 18.20305638 |
| BLOC1S5-TXNDC5 | NR_037616    | 80.68182108 | 3.099150379 | 4.60E-07    | 26.03352894 |
| COPG1          | NM_016128    | 104.6289483 | 6.277446099 | 3.46E-08    | 16.66743873 |
| NCAPH2         | NM_014551    | 94.86549455 | 9.755315534 | 1.05E-06    | 9.724492685 |
| CDC42BPA       | NM_014826    | 58.96916018 | 2.028805549 | 3.34E-05    | 29.06594977 |
| PLEKHN1        | NM_001160184 | 85.1507537  | 14.70683743 | 7.89E-05    | 5.789875225 |
| UBE2O          | NM_022066    | 146.742818  | 14.64898876 | 8.81E-10    | 10.01726607 |
| FAM117B        | NM_173511    | 38.13080067 | 2.685568859 | 0.003800599 | 14.19840737 |
| TMED2          | NM_006815    | 140.9624333 | 6.515920398 | 2.99E-12    | 21.63354135 |
| LOC100506023   | NR_037845    | 38.13080067 | 2.538518812 | 0.003930345 | 15.0208856  |
| DCTD           | NM_001921    | 102.394482  | 1.369652365 | 4.52E-11    | 74.75946787 |
| LPGAT1         | NM_014873    | 91.8054398  | 2.448950131 | 2.33E-08    | 37.48767222 |
| TPI1P2         | NR_002187    | 101.5201806 | 25.06561235 | 0.000357394 | 4.050177557 |
| SLC35A5        | NM_017945    | 40.80241766 | 2.920497474 | 0.001407368 | 13.97105049 |
| MLXIP          | NM_014938    | 87.33650713 | 4.385754347 | 4.88E-07    | 19.91367966 |
| TMEM14A        | NM_014051    | 66.98401118 | 4.238849127 | 1.74E-05    | 15.80240513 |

|           |              |             |             |             |             |
|-----------|--------------|-------------|-------------|-------------|-------------|
| PLCG1     | NM_002660    | 55.86039251 | 7.376772653 | 0.000986451 | 7.572470393 |
| DDX11-AS1 | NR_038927    | 55.42324183 | 5.624012276 | 0.000483038 | 9.854751218 |
| TOLLIP    | NM_019009    | 97.97426223 | 9.517396076 | 1.54E-06    | 10.29422979 |
| EDEM3     | NM_025191    | 105.9404003 | 2.529402241 | 6.66E-10    | 41.88357178 |
| CYP2R1    | NM_024514    | 70.04406598 | 4.049946684 | 3.72E-06    | 17.29505879 |
| CFDP1     | NM_006324    | 65.62384623 | 4.132109486 | 9.61E-06    | 15.88143936 |
| DHRS7B    | NM_015510    | 78.05891695 | 3.615118219 | 6.02E-07    | 21.59235528 |
| NUDT19    | NM_001105570 | 109.5350315 | 6.370204091 | 1.34E-08    | 17.19490145 |
| IGFBP2    | NM_000597    | 74.46428571 | 9.437430449 | 0.000124342 | 7.890313589 |
| MCCC2     | NM_022132    | 137.8536657 | 3.037835365 | 7.73E-13    | 45.37891265 |
| MOSPD2    | NM_152581    | 27.49304557 | 1.109342326 | 0.003077731 | 24.78319353 |
| ACTR3B    | NM_020445    | 148.4914208 | 3.113856236 | 1.02E-13    | 47.6873078  |
| CD9       | NM_001769    | 87.33650713 | 10.11037108 | 8.79E-06    | 8.638308765 |
| FAM168B   | NM_001009993 | 211.44365   | 6.257619853 | 5.11E-18    | 33.78978828 |
| PAPD5     | NM_001040284 | 105.066099  | 2.648483554 | 9.53E-10    | 39.67028559 |
| GNAI1     | NM_002069    | 126.3416091 | 4.272031142 | 1.67E-10    | 29.57413112 |
| PSMB4     | NM_002796    | 103.3174962 | 19.06978647 | 5.76E-05    | 5.417863298 |
| GALK1     | NM_000154    | 80.73053395 | 15.24044355 | 0.000209967 | 5.297124961 |
| OTULIN    | NM_138348    | 66.93529829 | 3.483512225 | 5.21E-06    | 19.2148883  |
| MTERF2    | NM_001033050 | 75.38729997 | 7.478728453 | 1.27E-05    | 10.08022961 |
| MED10     | NM_032286    | 51.44017277 | 8.001319634 | 0.004301174 | 6.428961112 |
| PPIF      | NM_005729    | 161.3636422 | 18.21173457 | 9.07E-10    | 8.860421373 |
| RIPK4     | NM_020639    | 91.31957618 | 9.183215203 | 4.08E-06    | 9.9441834   |
| REPS2     | NM_004726    | 28.36734694 | 1.169398033 | 0.004029097 | 24.2580765  |
| NEIL3     | NM_018248    | 115.7038541 | 1.449939875 | 1.91E-11    | 79.79907038 |
| RAVER1    | NM_133452    | 86.89935644 | 20.17291354 | 0.000876781 | 4.307724626 |
| DVL3      | NM_004423    | 91.31957618 | 10.98503881 | 3.42E-06    | 8.313086349 |
| TBC1D8B   | NM_198881    | 59.40631088 | 1.160665636 | 9.70E-06    | 51.18296696 |
| 5-Mar     | NM_017824    | 88.69667206 | 5.010509353 | 3.96E-07    | 17.70212683 |
| INPP5B    | NM_001297434 | 80.2446704  | 3.033128193 | 3.00E-07    | 26.45607613 |
| TOP2A     | NM_001067    | 107.3005653 | 5.950904999 | 1.84E-08    | 18.03096593 |
| CMC2      | NM_020188    | 132.5591446 | 2.780738489 | 3.30E-13    | 47.67048218 |
| LOC389906 | NR_034031    | 70.48121666 | 4.75736119  | 8.78E-06    | 14.81519142 |
| THAP9     | NM_024672    | 74.95014928 | 5.875407475 | 4.24E-06    | 12.75658746 |
| DERL2     | NM_016041    | 76.69875203 | 8.915259616 | 3.85E-05    | 8.603086767 |
| HHLA1     | NM_001145095 | 29.2903612  | 0.148281932 | 0.000658844 | 197.5315584 |
| RBM38     | NM_017495    | 105.5032497 | 14.55292132 | 3.06E-06    | 7.249626887 |
| NDFIP1    | NM_030571    | 110.8464837 | 4.037905861 | 1.75E-09    | 27.45147794 |
| LOC440434 | NR_036750    | 98.41141291 | 2.633164677 | 4.77E-09    | 37.37381629 |
| TRIM24    | NM_003852    | 87.33650713 | 0.4832027   | 5.85E-10    | 180.7450728 |
| AAAS      | NM_001173466 | 115.2667034 | 7.52257661  | 1.15E-08    | 15.32276896 |
| P4HTM     | NM_177938    | 90.4452748  | 21.2222068  | 0.000350675 | 4.261822329 |
| VPS37A    | NM_152415    | 93.55404248 | 3.13990722  | 9.17E-09    | 29.79516143 |
| MCIDAS    | NM_001190787 | 75.38729997 | 12.25920216 | 0.000198737 | 6.149445858 |
| C2orf15   | NM_144706    | 44.34833603 | 2.156914372 | 0.000123603 | 20.5610091  |
| PIGF      | NM_002643    | 51.44017277 | 3.742968508 | 0.000143585 | 13.74314869 |
| ZFH3      | NM_006885    | 59.40631088 | 2.494560853 | 3.34E-05    | 23.81433623 |
| DHX9      | NM_001357    | 172.0013972 | 7.345786055 | 7.43E-14    | 23.41497505 |
| AP2B1     | NM_001282    | 54.98609113 | 1.022791191 | 8.65E-06    | 53.76081804 |
| KLHL42    | NM_020782    | 175.1101649 | 2.526867864 | 4.77E-18    | 69.29929632 |
| SPINT2    | NM_001166103 | 107.737716  | 9.2439317   | 1.31E-07    | 11.65496669 |
| MRPL13    | NM_014078    | 139.6509813 | 2.591768784 | 1.28E-13    | 53.88249991 |
| NCAPD2    | NM_014865    | 64.74954487 | 9.9957487   | 0.000657971 | 6.477708355 |
| TIAL1     | NM_001033925 | 156.069121  | 8.362807036 | 3.03E-12    | 18.66228891 |
| METTL3    | NM_019852    | 74.95014928 | 8.58968513  | 7.40E-05    | 8.725599151 |
| EPHB4     | NM_004444    | 77.13590271 | 13.64305958 | 0.000234879 | 5.653856621 |
| APC       | NM_001127511 | 104.6289483 | 3.290360688 | 1.71E-09    | 31.7986258  |
| C7orf50   | NM_001134396 | 73.58998434 | 11.32151481 | 0.000166562 | 6.500012195 |
| CTCF      | NM_001191022 | 69.1697646  | 5.246326252 | 2.81E-05    | 13.18441921 |
| KDM5B     | NM_006618    | 71.40423091 | 4.158634631 | 1.48E-05    | 17.17011405 |
| CTSO      | NM_001334    | 76.26160134 | 1.220413543 | 5.51E-08    | 62.48832763 |
| XPR1      | NM_001135669 | 72.71568297 | 2.113431884 | 2.81E-06    | 34.40644741 |

|                        |              |             |             |             |             |
|------------------------|--------------|-------------|-------------|-------------|-------------|
| KRT40                  | NM_182497    | 41.67671904 | 5.546481621 | 0.002765514 | 7.514082239 |
| CCDC88C                | NM_001080414 | 55.86039251 | 6.123157214 | 0.000315667 | 9.122808798 |
| DOK4                   | NM_018110    | 88.64795919 | 17.93512028 | 0.000202365 | 4.942702241 |
| TP53BP2                | NM_001031685 | 76.69875203 | 4.033526885 | 4.06E-06    | 19.015307   |
| WHAMMP2                | NR_026589    | 33.27343024 | 2.880726714 | 0.004937309 | 11.55035987 |
| SNED1                  | NM_001080437 | 63.38937993 | 9.606926347 | 0.000396304 | 6.598299773 |
| IPMK                   | NM_152230    | 61.2036265  | 0.488530398 | 5.64E-07    | 125.2811017 |
| C9orf40                | NM_017998    | 111.2836343 | 8.751174836 | 2.03E-08    | 12.71642224 |
| TMEM54                 | NM_033504    | 97.53711154 | 17.13798222 | 2.20E-05    | 5.691283271 |
| CDCP1                  | NM_022842    | 148.9772843 | 6.105448034 | 1.40E-12    | 24.40071285 |
| SAAL1                  | NM_138421    | 113.9552513 | 3.27626199  | 2.10E-10    | 34.78209365 |
| TM9SF3                 | NM_020123    | 140.9624333 | 3.690430208 | 4.90E-12    | 38.19674818 |
| LINC00094              | NR_015427    | 59.40631088 | 10.27379352 | 0.002397494 | 5.782315051 |
| MBOAT2                 | NM_138799    | 53.18877551 | 1.25260819  | 9.64E-06    | 42.46242037 |
| RYK                    | NM_002958    | 72.71568297 | 1.651732065 | 1.66E-06    | 44.02389741 |
| RAB1B                  | NM_030981    | 97.09996085 | 22.37768846 | 0.000235019 | 4.339141687 |
| HARBI1                 | NM_173811    | 68.73261391 | 8.90307111  | 0.000249751 | 7.720101644 |
| STAG3L5P-PVRIG2P-PILRB | NR_036569    | 123.6699922 | 17.66075314 | 6.45E-07    | 7.002532183 |
| QTRT1                  | NM_031209    | 59.89217444 | 8.578772866 | 0.001212269 | 6.981438415 |
| UBE2Z                  | NM_023079    | 183.076303  | 16.02059273 | 4.01E-12    | 11.42756114 |
| PKN3                   | NM_013355    | 98.02297512 | 21.81471772 | 0.000140066 | 4.49343312  |
| DDX5                   | NM_004396    | 168.0183282 | 21.7770576  | 8.57E-10    | 7.715382455 |
| BMS1                   | NM_014753    | 119.2497724 | 4.112436018 | 3.23E-10    | 28.99735628 |
| COQ6                   | NM_182476    | 111.2836343 | 9.472578514 | 2.77E-08    | 11.74797698 |
| STAG3L1                | NR_040583    | 227.8617898 | 20.24896363 | 3.17E-15    | 11.25300998 |
| ABHD17B                | NM_001025780 | 74.07584791 | 3.201944934 | 8.37E-07    | 23.13464143 |
| RBM14-RBM4             | NM_001198846 | 174.6730143 | 20.33794069 | 1.80E-10    | 8.588530027 |
| ZNF500                 | NM_021646    | 58.5320095  | 11.1215166  | 0.002623601 | 5.262952134 |
| SENP2                  | NM_021627    | 61.64077717 | 2.115935269 | 8.37E-06    | 29.13169324 |
| HEATR5A                | NM_015473    | 137.4165149 | 3.502028834 | 1.97E-12    | 39.23911578 |
| HNRNPM                 | NM_005968    | 105.9891132 | 10.13467449 | 3.31E-07    | 10.45806783 |
| PIGW                   | NM_178517    | 112.1579357 | 11.5017495  | 1.31E-07    | 9.751380495 |
| LRRCC1                 | NM_033402    | 39.05381491 | 1.894344144 | 0.001482802 | 20.61600847 |
| ERLIN1                 | NM_001100626 | 65.67255911 | 5.949749278 | 4.15E-05    | 11.03787001 |
| PROSER3                | NM_001039887 | 83.35343807 | 16.56387826 | 0.000459537 | 5.03224165  |
| TAF13                  | NM_005645    | 68.73261391 | 7.184120096 | 5.19E-05    | 9.567297455 |
| ITGB1BP1               | NM_022334    | 91.75672686 | 10.15914561 | 3.18E-06    | 9.031933434 |
| ABHD5                  | NM_016006    | 129.8875276 | 3.594625354 | 1.38E-11    | 36.133815   |
| FBXL12                 | NM_017703    | 122.3585401 | 6.221212517 | 2.50E-10    | 19.66795697 |
| ARHGAP42               | NM_152432    | 51.44017277 | 1.480341842 | 0.000194762 | 34.74884741 |
| TICAM1                 | NM_182919    | 66.54686048 | 10.8702633  | 0.000519272 | 6.121917995 |
| CYR61                  | NM_001554    | 214.5524176 | 16.48001818 | 4.69E-15    | 13.01894302 |
| SUPV3L1                | NM_003171    | 90.8824255  | 4.777201785 | 1.09E-07    | 19.0241965  |
| ZNF524                 | NM_153219    | 85.10204081 | 20.84930763 | 0.001155323 | 4.081768197 |
| PRPF40B                | NM_001031698 | 63.38937993 | 12.81470809 | 0.002757958 | 4.946611308 |
| MNX1-AS1               | NR_038835    | 68.29546324 | 9.631928738 | 0.000362637 | 7.090528293 |
| POLR3A                 | NM_007055    | 43.47403467 | 6.390481026 | 0.00468494  | 6.802936194 |
| BMS1P4                 | NR_026592    | 133.8705966 | 3.683422404 | 3.60E-12    | 36.34407948 |
| SAP18                  | NM_005870    | 66.54686048 | 8.953798683 | 0.000311891 | 7.432248908 |
| ELK3                   | NM_005230    | 49.64285714 | 5.432084891 | 0.001580744 | 9.138822044 |
| VTI1B                  | NM_006370    | 69.1697646  | 6.232427857 | 8.05E-05    | 11.09836587 |
| NFATC2IP               | NM_032815    | 86.46220574 | 12.66355493 | 3.70E-05    | 6.827640913 |
| ABHD17C                | NM_021214    | 91.31957618 | 3.754960386 | 2.44E-08    | 24.3197176  |
| KREMEN1                | NM_001039570 | 56.73469387 | 2.918915743 | 4.84E-05    | 19.43690701 |
| PAPOLG                 | NM_022894    | 73.15283366 | 2.022375573 | 5.40E-07    | 36.17173518 |
| TMEM5                  | NM_014254    | 44.78548671 | 3.06087343  | 0.000440874 | 14.6316036  |
| STARD7                 | NM_020151    | 205.2748275 | 10.41037939 | 7.42E-16    | 19.71828497 |
| TTC3                   | NM_001001894 | 90.4452748  | 2.661165385 | 3.23E-08    | 33.98709277 |
| LASP1                  | NR_073384    | 108.6120173 | 14.39249016 | 9.00E-07    | 7.546436796 |
| LOC100506207           | NR_038979    | 87.77365781 | 0.699048237 | 3.25E-09    | 125.5616611 |
| KIAA0753               | NM_014804    | 72.71568297 | 3.537960828 | 2.06E-06    | 20.55299267 |
| GNG7                   | NM_052847    | 101.9573313 | 9.158276817 | 1.91E-07    | 11.13280733 |

|              |              |             |             |             |             |
|--------------|--------------|-------------|-------------|-------------|-------------|
| SDAD1        | NM_001288984 | 40.36526697 | 3.75891293  | 0.001861579 | 10.73854801 |
| PIAS4        | NM_015897    | 77.57305339 | 16.00709601 | 0.00068711  | 4.846166559 |
| MAPKAPK2     | NM_032960    | 56.73469387 | 6.966435745 | 0.001026183 | 8.144005909 |
| ZNF768       | NM_024671    | 143.1968996 | 33.71965902 | 1.42E-05    | 4.246688838 |
| SFT2D2       | NM_199344    | 80.2446704  | 7.343200126 | 6.21E-06    | 10.92775207 |
| C10orf25     | NM_001039380 | 91.75672686 | 0.590385969 | 4.32E-11    | 155.4182039 |
| ZNF267       | NM_001265588 | 100.6458792 | 2.701734796 | 1.57E-09    | 37.25231632 |
| NOL7         | NM_016167    | 121.0470881 | 1.178018219 | 8.03E-15    | 102.7548523 |
| HS3ST1       | NM_005114    | 76.26160134 | 4.112476875 | 2.46E-06    | 18.5439587  |
| PTOV1-AS1    | NR_040037    | 84.66489013 | 13.60889016 | 3.45E-05    | 6.221292784 |
| HCFC1        | NM_005334    | 63.38937993 | 12.09618241 | 0.001045715 | 5.240445109 |
| GNB1L        | NM_053004    | 68.29546324 | 11.33329073 | 0.00043768  | 6.026092939 |
| PDXK         | NM_003681    | 122.3585401 | 16.87070488 | 2.21E-07    | 7.252722451 |
| NCLN         | NM_020170    | 104.1917976 | 20.68055711 | 5.75E-05    | 5.038152358 |
| FAM3C        | NM_001040020 | 125.9044585 | 1.074477049 | 2.52E-13    | 117.1774294 |
| ZNF425       | NM_001001661 | 118.375471  | 7.214156106 | 2.70E-09    | 16.40877592 |
| MTMR6        | NM_004685    | 64.74954487 | 0.336654702 | 1.31E-08    | 192.3322159 |
| MSX2         | NM_002449    | 96.22565948 | 13.9207222  | 5.01E-06    | 6.912404263 |
| GRPEL1       | NM_025196    | 93.99119317 | 10.17423535 | 2.48E-06    | 9.238157953 |
| ANXA3        | NM_005139    | 62.51507855 | 4.26896087  | 8.01E-05    | 14.64409735 |
| AP3D1        | NM_003938    | 95.30264523 | 14.93296262 | 1.27E-05    | 6.382031996 |
| LANCL1       | NM_001136574 | 39.9281163  | 0.347932356 | 5.59E-05    | 114.7582729 |
| ELAVL1       | NM_001419    | 109.4863187 | 12.25029254 | 8.21E-07    | 8.937445237 |
| KATNBL1      | NM_024713    | 135.6679122 | 4.201726651 | 2.07E-11    | 32.28860978 |
| TIMM22       | NM_013337    | 65.62384623 | 8.617314116 | 0.00016752  | 7.615348047 |
| ANTXR1       | NM_053034    | 51.87732345 | 1.644787601 | 0.000177336 | 31.54043928 |
| SCPEP1       | NM_021626    | 100.6458792 | 9.001431911 | 7.40E-07    | 11.18109654 |
| UQCRFS1      | NM_006003    | 56.78340675 | 5.847983315 | 0.000267069 | 9.70991258  |
| FOPNL        | NM_144600    | 83.79058876 | 1.37401451  | 7.76E-09    | 60.98231726 |
| AUNIP        | NM_001287490 | 111.7207851 | 6.621364919 | 1.04E-08    | 16.87277267 |
| YWHAH        | NM_003405    | 162.2379435 | 13.26006312 | 1.52E-11    | 12.23508079 |
| TLR5         | NM_003268    | 47.01995303 | 4.161709904 | 0.002287705 | 11.29822936 |
| GTF2F2       | NM_004128    | 82.04198601 | 3.954130171 | 2.58E-07    | 20.74842822 |
| POP4         | NR_027368    | 48.33140508 | 5.964420709 | 0.003105575 | 8.103285707 |
| LOC101928001 | NR_110822    | 40.80241766 | 3.210843501 | 0.001343803 | 12.7076943  |
| FBXL17       | NM_001163315 | 110.4093329 | 0.719452193 | 3.14E-11    | 153.463057  |
| UGCG         | NM_003358    | 130.7618289 | 5.948767131 | 1.71E-10    | 21.98133261 |
| RPL13AP5     | NR_026712    | 239.3738462 | 58.94776035 | 9.68E-09    | 4.06077932  |
| SHISA4       | NR_030775    | 72.71568297 | 13.66477299 | 0.001354744 | 5.32139707  |
| MIS18A       | NM_018944    | 66.06099693 | 0.272505085 | 3.37E-09    | 242.4211529 |
| TMEM187      | NM_003492    | 45.65978809 | 5.513252388 | 0.001580744 | 8.281824389 |
| CFAP20       | NM_013242    | 76.26160134 | 8.630537034 | 4.78E-05    | 8.83625214  |
| MGA          | NM_001164273 | 49.69157001 | 2.489408982 | 0.000330472 | 19.96119174 |
| DNAJB11      | NM_016306    | 71.8413816  | 7.072709595 | 3.50E-05    | 10.15754721 |
| FAM71E1      | NM_138411    | 154.757669  | 13.86947115 | 2.21E-10    | 11.15815213 |
| C11orf58     | NM_014267    | 67.85831254 | 3.412847648 | 9.17E-06    | 19.88319419 |
| CLCC1        | NM_001048210 | 80.2446704  | 3.245253826 | 1.67E-07    | 24.72677784 |
| CDR2L        | NM_014603    | 169.3784932 | 18.05170355 | 6.81E-11    | 9.382964477 |
| LRIG1        | NM_015541    | 48.76855577 | 1.841220386 | 0.000316884 | 26.48708222 |
| ERCC6-PGBD3  | NM_001277058 | 66.06099693 | 3.66648014  | 2.37E-05    | 18.01755209 |
| HDLBP        | NM_001243900 | 66.49814761 | 7.878964392 | 0.000200153 | 8.439960418 |
| 2-Mar        | NM_017898    | 86.89935644 | 4.415924499 | 4.53E-07    | 19.67863274 |
| MLLT6        | NM_005937    | 80.2446704  | 15.0335225  | 0.000394882 | 5.337715787 |
| SNX31        | NM_152628    | 44.78548671 | 6.617235199 | 0.002804836 | 6.768005876 |
| TMEM2        | NM_013390    | 116.1410048 | 3.601430074 | 1.07E-10    | 32.2485797  |
| RAI1         | NM_030665    | 101.5201806 | 15.87056993 | 9.96E-06    | 6.396757084 |
| FUT10        | NM_032664    | 82.91628738 | 1.545686249 | 1.25E-07    | 53.64367279 |
| RSPRY1       | NM_133368    | 54.54894044 | 6.731545839 | 0.000498785 | 8.103479015 |
| LOC101927746 | NR_110115    | 101.0830299 | 12.10905309 | 1.74E-06    | 8.347723737 |
| SPR          | NM_003124    | 73.20154654 | 11.39609664 | 0.000309915 | 6.423387661 |
| SDHAF2       | NM_017841    | 86.46220574 | 9.242310563 | 9.00E-06    | 9.355042243 |
| MAOB         | NM_000898    | 31.9132653  | 0.915515381 | 0.00186182  | 34.85825138 |

|              |              |              |             |             |             |
|--------------|--------------|--------------|-------------|-------------|-------------|
| CSRNP1       | NM_033027    | 110.4093329  | 22.05239519 | 2.40E-05    | 5.00668213  |
| ITFG1        | NM_030790    | 110.4093329  | 0.331977789 | 4.91E-12    | 332.5804817 |
| ZEB1-AS1     | NR_024284    | 44.34833603  | 4.882129976 | 0.003628772 | 9.083808962 |
| CDK2AP2      | NR_073484    | 93.11689181  | 14.37247218 | 8.44E-05    | 6.478836116 |
| PPRC1        | NM_001288727 | 157.8177238  | 23.6941246  | 9.60E-09    | 6.660626903 |
| GPRIN1       | NM_052899    | 120.5612245  | 13.26223953 | 1.37E-07    | 9.090563037 |
| ZC3H7A       | NM_014153    | 152.0373391  | 4.666425579 | 3.04E-13    | 32.581113   |
| TMEM97       | NM_014573    | 71.40423091  | 7.327525562 | 2.27E-05    | 9.744658044 |
| PKP4         | NM_003628    | 73.58998434  | 2.119378406 | 1.48E-06    | 34.72243754 |
| NOL11        | NM_015462    | 133.4821588  | 2.790612051 | 8.98E-13    | 47.8325745  |
| STK35        | NM_080836    | 114.392402   | 6.102390078 | 1.52E-09    | 18.74550799 |
| SIK2         | NM_015191    | 101.9573313  | 3.544108745 | 3.09E-09    | 28.76811594 |
| TRMT6        | NM_001281467 | 83.79058876  | 5.418490818 | 1.58E-06    | 15.46382407 |
| PTPLB        | NM_198402    | 119.2497724  | 3.915557747 | 5.50E-10    | 30.45537319 |
| PHC3         | NM_024947    | 64.31239418  | 2.806053257 | 7.87E-06    | 22.91916379 |
| PWP1         | NM_007062    | 46.14565165  | 2.634644534 | 0.000384202 | 17.51494407 |
| TMEM192      | NM_001100389 | 66.98401118  | 4.520728523 | 3.70E-05    | 14.81708332 |
| ARSK         | NM_198150    | 47.45710371  | 1.156702689 | 0.000172164 | 41.02791857 |
| LOC100506476 | NR_109995    | 91.31957618  | 5.441719566 | 3.21E-07    | 16.78138226 |
| C9orf3       | NM_032823    | 100.6458792  | 4.289944247 | 6.16E-08    | 23.4608828  |
| PFN2         | NM_002628    | 108.6120173  | 8.275837615 | 3.10E-08    | 13.12399087 |
| B2M          | NM_004048    | 113.9552513  | 9.989365928 | 1.69E-08    | 11.40765612 |
| ANKRD13D     | NR_030767    | 59.40631088  | 14.4877792  | 0.004092609 | 4.100442866 |
| POLR2C       | NM_032940    | 164.4724099  | 11.0422787  | 1.62E-12    | 14.89478887 |
| SUGP1        | NM_172231    | 101.5201806  | 10.10207941 | 5.82E-07    | 10.04943403 |
| CDC123       | NM_006023    | 51.44017277  | 5.220400867 | 0.000850203 | 9.853682519 |
| STRIP2       | NM_020704    | 161.8007928  | 5.003266986 | 3.92E-14    | 32.33902834 |
| CD70         | NM_001252    | 66.49814761  | 12.80591514 | 0.002119915 | 5.192768097 |
| ZNF554       | NM_001102651 | 77.13590271  | 13.0631343  | 0.000199408 | 5.904854143 |
| SLC17A8      | NM_139319    | 30.16466256  | 0.178537899 | 0.000547855 | 168.9538342 |
| CDK5R2       | NM_003936    | 59.84346156  | 11.87099394 | 0.002751734 | 5.041150038 |
| DDX18        | NM_006773    | 43.91118534  | 2.48209729  | 0.000560466 | 17.69116203 |
| CEP85L       | NM_206921    | 37.2564993   | 1.31766156  | 0.000551148 | 28.27471062 |
| ELAC1        | NM_018696    | 135.6679122  | 4.457425777 | 1.72E-12    | 30.43638168 |
| LIN9         | NM_001270409 | 118.375471   | 3.995355282 | 9.07E-10    | 29.6282715  |
| DDIAS        | NM_145018    | 36.38219793  | 2.120106369 | 0.002754166 | 17.1605531  |
| GOLGA3       | NM_001172557 | 86.46220574  | 9.454269935 | 1.58E-05    | 9.1453075   |
| ZNFX1        | NM_021035    | 61.64077717  | 7.212629145 | 0.000310206 | 8.546228558 |
| PPAPDC2      | NM_203453    | 182.6391524  | 13.4649998  | 6.85E-13    | 13.56399221 |
| ARIH1        | NM_005744    | 90.4452748   | 4.997719552 | 2.79E-07    | 18.09730896 |
| RBBP7        | NM_001198719 | 45.65978809  | 1.085513817 | 0.000177638 | 42.06283454 |
| GDE1         | NM_016641    | 117.5011696  | 2.989908982 | 4.11E-11    | 39.29924635 |
| FOSL2        | NM_005253    | 93.99119317  | 10.70490656 | 2.16E-06    | 8.780197438 |
| MAP4K5       | NM_006575    | 82.04198601  | 4.58620184  | 1.59E-06    | 17.88887382 |
| GINS3        | NM_001126130 | 43.47403467  | 5.222962815 | 0.003231011 | 8.323634728 |
| LOC100996342 | NR_103793    | 35.02203299  | 0.782753181 | 0.001098623 | 44.74211518 |
| RRAGD        | NM_021244    | 62.07792787  | 3.17482779  | 1.15E-05    | 19.55316382 |
| TRUB1        | NM_139169    | 73.63869723  | 2.926782554 | 6.81E-07    | 25.16028979 |
| MFN1         | NM_033540    | 38.13080067  | 0.281227927 | 0.000102753 | 135.5868214 |
| TOR1A        | NM_000113    | 179.5303847  | 19.63216006 | 4.39E-11    | 9.144708691 |
| KITLG        | NM_003994    | 153.8346547  | 4.975246337 | 4.82E-13    | 30.92000764 |
| GANC         | NM_198141    | 37.69364998  | 2.715781105 | 0.003600753 | 13.87948753 |
| ITGA5        | NM_002205    | 107.3005653  | 12.68429283 | 5.85E-07    | 8.459325774 |
| NANP         | NM_152667    | 45.226263741 | 1.20710546  | 6.68E-05    | 37.46370047 |
| TRA2B        | NM_004593    | 155.5832575  | 9.552798558 | 7.25E-12    | 16.28666789 |
| ABCB6        | NM_005689    | 101.9573313  | 18.26604123 | 3.04E-05    | 5.581796843 |
| TAF9         | NM_003187    | 175.5473156  | 11.60746976 | 2.49E-13    | 15.12365048 |
| PLEKHA7      | NM_175058    | 77.57305339  | 3.904980379 | 9.19E-07    | 19.8651583  |
| KCNMB4       | NM_014505    | 45.22263741  | 2.221413069 | 0.000532613 | 20.35759942 |
| MZT2A        | NM_001085365 | 91.75672686  | 21.2497521  | 0.00024849  | 4.31801399  |
| GPR180       | NM_180989    | 93.11689181  | 1.670591147 | 1.39E-09    | 55.73888739 |
| TP53INP1     | NM_001135733 | 69.60691528  | 9.511527527 | 0.000334359 | 7.31816368  |



|              |              |             |             |             |             |
|--------------|--------------|-------------|-------------|-------------|-------------|
| SNAP29       | NM_004782    | 47.8942544  | 5.508124417 | 0.001364172 | 8.69520199  |
| RAVER2       | NM_018211    | 87.77365781 | 3.09110291  | 5.24E-08    | 28.39557931 |
| METTL8       | NM_024770    | 101.5201806 | 3.060553641 | 2.74E-09    | 33.17052811 |
| HSPBAP1      | NM_024610    | 62.51507855 | 0.622329501 | 2.08E-07    | 100.4533426 |
| HPS3         | NM_032383    | 96.22565948 | 2.677186916 | 3.09E-09    | 35.9428245  |
| CDK11A       | NM_024011    | 86.89935644 | 12.29730771 | 4.40E-05    | 7.066535089 |
| RAD23A       | NR_072976    | 190.6052905 | 22.47463265 | 7.83E-12    | 8.48090794  |
| RAB11B-AS1   | NR_038237    | 108.6120173 | 7.397063786 | 1.05E-08    | 14.68312569 |
| MTAP         | NM_002451    | 129.4503768 | 7.070279127 | 7.00E-10    | 18.30908999 |
| GGA2         | NM_015044    | 121.9213894 | 6.95468466  | 1.73E-09    | 17.53082928 |
| C12orf75     | NM_001145199 | 74.02713503 | 3.668623526 | 8.46E-07    | 20.17844963 |
| PARGP1       | NR_029388    | 62.07792787 | 0.663015219 | 6.89E-07    | 93.6297178  |
| CCDC150      | NM_001080539 | 69.1697646  | 2.35431491  | 3.87E-06    | 29.37999684 |
| MTERF3       | NM_001286643 | 165.3467113 | 3.553879346 | 3.36E-16    | 46.52569634 |
| TBK1         | NM_013254    | 121.4842387 | 3.333009511 | 1.28E-11    | 36.44881249 |
| NUDT6        | NM_007083    | 73.15283366 | 3.946812264 | 4.42E-06    | 18.5346626  |
| PLOD1        | NM_000302    | 93.11689181 | 14.73090379 | 1.20E-05    | 6.321193401 |
| ZNF282       | NM_003575    | 115.2667034 | 7.546214227 | 7.47E-09    | 15.27477221 |
| RITA1        | NM_032848    | 66.49814761 | 14.89607524 | 0.002790874 | 4.464138811 |
| AIFM2        | NM_001198696 | 82.91628738 | 10.29817071 | 2.02E-05    | 8.05155495  |
| ASCC3        | NM_022091    | 60.32932513 | 3.573346118 | 8.79E-05    | 16.88314625 |
| SAA2-SAA4    | NM_001199744 | 33.71058093 | 3.17769935  | 0.004776248 | 10.60848659 |
| MFSD9        | NM_032718    | 97.97426223 | 2.259144271 | 3.77E-10    | 43.36786433 |
| INTS3        | NM_023015    | 152.0373391 | 6.690625937 | 3.89E-12    | 22.72393354 |
| STAG3L3      | NR_040582    | 109.049168  | 4.10570018  | 4.23E-10    | 26.56043141 |
| COG1         | NM_018714    | 64.31239418 | 12.05723559 | 0.001508624 | 5.333925318 |
| FBXO43       | NM_001029860 | 36.8193486  | 1.656885757 | 0.00128108  | 22.22202011 |
| BLM          | NM_001287246 | 129.4503768 | 3.401166654 | 9.27E-12    | 38.06058037 |
| MEIG1        | NM_001080836 | 102.394482  | 8.96602859  | 1.79E-07    | 11.42027163 |
| PIGH         | NM_004569    | 79.37036901 | 7.317761446 | 3.80E-06    | 10.84626352 |
| SUGP2        | NM_014884    | 97.53711154 | 9.914744121 | 1.72E-06    | 9.837582327 |
| VPRBP        | NM_001171904 | 66.06099693 | 4.139252311 | 5.10E-05    | 15.95964487 |
| KIAA2018     | NM_001009899 | 70.48121666 | 4.960688294 | 1.30E-05    | 14.20795109 |
| THAP10       | NM_020147    | 67.42116185 | 4.001768688 | 5.12E-06    | 16.84784082 |
| ABCA11P      | NR_002451    | 79.8075197  | 4.979628775 | 2.11E-06    | 16.02680105 |
| AK7          | NM_152327    | 41.67671904 | 2.765335396 | 0.001116602 | 15.07112631 |
| PMM1         | NM_002676    | 79.8075197  | 12.99783756 | 0.000100727 | 6.140061322 |
| COX6B1       | NM_001863    | 62.07792787 | 9.280117063 | 0.000668671 | 6.6893475   |
| EEPD1        | NM_030636    | 116.5781554 | 4.302920154 | 1.46E-09    | 27.09280007 |
| MND1         | NM_032117    | 100.2087285 | 4.463706262 | 3.53E-08    | 22.4496691  |
| EEF2K        | NM_013302    | 86.89935644 | 6.37291159  | 8.87E-07    | 13.63573858 |
| TMEM170B     | NM_001100829 | 23.94712719 | 0.14097661  | 0.004336431 | 169.8659605 |
| LSM11        | NM_173491    | 75.38729997 | 0.880192928 | 5.41E-09    | 85.64860901 |
| PTPN21       | NM_007039    | 38.56795136 | 0.778031891 | 0.00040445  | 49.57117028 |
| PDLIM1       | NM_020992    | 40.36526697 | 3.992498244 | 0.001975512 | 10.11027795 |
| C12orf73     | NM_001135570 | 89.57097344 | 6.920037539 | 8.96E-07    | 12.94371207 |
| NUFIP1       | NM_012345    | 55.42324183 | 4.682993709 | 0.000457939 | 11.83500241 |
| LOC100132057 | NR_111930    | 199.0572922 | 5.153619359 | 8.60E-18    | 38.62475637 |
| POLQ         | NM_199420    | 82.4791367  | 2.717263861 | 1.97E-07    | 30.35374587 |
| C12orf29     | NM_001009894 | 92.67974111 | 4.603760323 | 3.58E-08    | 20.13131323 |
| NPAT         | NM_002519    | 49.69157001 | 3.703337941 | 0.000322216 | 13.41804902 |
| YBEY         | NM_001006114 | 168.8926296 | 8.840952281 | 3.61E-14    | 19.10344318 |
| LOC101928323 | NR_125400    | 63.38937993 | 8.0044936   | 0.000342608 | 7.919224264 |
| FBXO15       | NM_152676    | 34.58488231 | 0.396917316 | 0.00051862  | 87.13372004 |
| PRPF4        | NM_004697    | 104.6289483 | 7.192757472 | 2.12E-08    | 14.54643072 |
| ZNF574       | NM_022752    | 161.3636422 | 26.09475728 | 2.36E-08    | 6.183757161 |
| DPY19L2P3    | NR_036482    | 87.77365781 | 7.47341604  | 1.94E-06    | 11.74478409 |
| UACA         | NM_018003    | 99.33442714 | 3.584499706 | 5.36E-09    | 27.71221517 |
| LMO4         | NM_006769    | 98.41141291 | 8.286305071 | 2.09E-07    | 11.87639268 |
| ZNF658       | NM_033160    | 39.49096561 | 0.138321069 | 4.19E-06    | 285.5021717 |
| MAN2B2       | NM_015274    | 86.46220574 | 11.89713792 | 1.71E-05    | 7.267479483 |
| MIR31HG      | NR_027054    | 190.1681398 | 7.527836666 | 3.28E-15    | 25.2619907  |

|              |              |             |             |             |             |
|--------------|--------------|-------------|-------------|-------------|-------------|
| NUP155       | NM_001278312 | 69.1697646  | 4.24466969  | 2.68E-05    | 16.29567661 |
| RBX1         | NM_014248    | 129.8875276 | 8.424975836 | 1.29E-09    | 15.41696144 |
| AHCTF1       | NM_015446    | 54.98609113 | 1.953921456 | 8.54E-05    | 28.14140301 |
| PLIN2        | NM_001122    | 58.09485881 | 5.183561781 | 0.000122247 | 11.20751739 |
| RAB4A        | NM_001271998 | 72.27853228 | 5.624550922 | 1.17E-05    | 12.85054279 |
| METTL10      | NM_212554    | 153.8346547 | 5.468160327 | 1.06E-13    | 28.13279888 |
| ACTL6A       | NM_178042    | 112.5950864 | 3.305076892 | 4.19E-10    | 34.06731222 |
| METTL16      | NM_024086    | 47.8942544  | 5.155231203 | 0.001616867 | 9.290418318 |
| MUC16        | NM_024690    | 31.9132653  | 0.308845086 | 0.001355593 | 103.3309797 |
| ZNF354B      | NM_058230    | 47.8942544  | 3.302488744 | 0.000214449 | 14.50247317 |
| EIF2B5       | NM_003907    | 69.1697646  | 13.16993263 | 0.000772839 | 5.25209707  |
| LINC00263    | NR_026762    | 104.1917976 | 8.481809969 | 1.90E-07    | 12.28414666 |
| LOC100507373 | NR_045214    | 106.8634146 | 17.25397013 | 4.70E-06    | 6.193555097 |
| NSMCE1       | NM_145080    | 97.09996085 | 4.755486891 | 4.68E-08    | 20.41851088 |
| C21orf59     | NM_021254    | 85.1507537  | 9.931433221 | 6.41E-06    | 8.573863591 |
| SYNJ2        | NM_003898    | 115.7038541 | 8.441512507 | 1.83E-08    | 13.70653115 |
| PRH1         | NM_001291315 | 126.3416091 | 2.472656434 | 3.13E-11    | 51.09549688 |
| FEM1C        | NM_020177    | 51.87732345 | 4.683346447 | 0.000643608 | 11.07697755 |
| PXMP2        | NM_018663    | 119.6869232 | 14.04862619 | 1.82E-07    | 8.519475251 |
| CXCL16       | NM_001100812 | 56.29754319 | 12.36140578 | 0.004257802 | 4.554299423 |
| SNX30        | NM_001012994 | 62.07792787 | 3.417482926 | 1.67E-05    | 18.16480995 |
| MIER2        | NM_017550    | 124.1071429 | 9.168532493 | 9.51E-09    | 13.53620582 |
| ATP5G1       | NM_001002027 | 116.1897176 | 27.44959237 | 6.65E-05    | 4.232839455 |
| ARHGAP31-AS1 | NR_046748    | 68.29546324 | 0.156191165 | 1.67E-10    | 437.255611  |
| C8orf44      | NM_019607    | 53.67463907 | 4.793365757 | 0.000248752 | 11.19769319 |
| HEXA-AS1     | NR_027262    | 72.71568297 | 14.19498098 | 0.002087663 | 5.12263335  |
| LRRC8C       | NM_032270    | 80.68182108 | 1.874802196 | 2.45E-07    | 43.03484456 |
| FIG4         | NM_014845    | 51.44017277 | 3.875708632 | 0.000198482 | 13.27245612 |
| MYEOV2       | NM_138336    | 118.8126218 | 10.2716647  | 1.21E-08    | 11.56702689 |
| FAM98B       | NM_173611    | 132.5591446 | 1.551352465 | 5.88E-14    | 85.44747086 |
| WDR43        | NM_015131    | 125.4673077 | 3.799240997 | 8.31E-11    | 33.02430876 |
| SPTSSA       | NM_138288    | 90.8824255  | 6.819428403 | 8.24E-07    | 13.3269858  |
| CNIH1        | NM_005776    | 67.85831254 | 4.804289499 | 9.49E-06    | 14.12452612 |
| PPM1D        | NM_003620    | 55.03480401 | 6.511500689 | 0.000514509 | 8.451938599 |
| TALDO1       | NM_006755    | 97.09996085 | 16.70413581 | 1.66E-05    | 5.812929324 |
| C16orf87     | NM_001001436 | 42.59973328 | 2.39960498  | 0.000746309 | 17.75281083 |
| EXOSC9       | NM_001034194 | 49.25441934 | 4.05826184  | 0.000887974 | 12.13682638 |
| FDX1         | NM_004109    | 80.68182108 | 3.004566376 | 1.58E-07    | 26.85306663 |
| JAGN1        | NM_032492    | 134.3077472 | 14.82434425 | 1.37E-08    | 9.059945248 |
| ROCK1        | NM_005406    | 63.38937993 | 1.422361447 | 1.40E-05    | 44.56629507 |
| UTP6         | NM_018428    | 86.89935644 | 2.11947235  | 2.82E-08    | 41.00046715 |
| RAB21        | NM_014999    | 88.2108085  | 3.246883629 | 2.08E-08    | 27.16783802 |
| DNAJA2       | NM_005880    | 58.5320095  | 1.048330031 | 4.31E-06    | 55.83357127 |
| SF3B2        | NM_006842    | 174.6730143 | 12.71056807 | 2.13E-12    | 13.74234521 |
| RCN1         | NM_002901    | 54.54894044 | 5.912591386 | 0.000305064 | 9.225893839 |
| RTKN2        | NM_145307    | 36.38219793 | 2.083129444 | 0.003429612 | 17.46516427 |
| CISD2        | NM_001008388 | 140.0881319 | 7.57346174  | 1.87E-11    | 18.49723901 |
| TDRD3        | NM_001146071 | 102.394482  | 0.682113185 | 5.97E-11    | 150.1136237 |
| DLX2         | NM_004405    | 101.0830299 | 18.77339733 | 8.67E-05    | 5.384375993 |
| MCOLN1       | NM_020533    | 90.4452748  | 21.63308256 | 0.000297616 | 4.180877809 |
| AKR7A2       | NM_003689    | 122.7956908 | 14.6457046  | 1.63E-07    | 8.384416739 |
| HSF1         | NM_005526    | 175.1101649 | 26.98557703 | 1.96E-09    | 6.489027998 |
| ACAT1        | NM_000019    | 108.6120173 | 4.946763476 | 2.01E-09    | 21.95617758 |
| DICER1-AS1   | NR_015415    | 37.2564993  | 1.676532823 | 0.002038779 | 22.22235007 |
| DNAJC25      | NR_037148    | 249.5744506 | 3.377939583 | 2.94E-27    | 73.88363364 |
| ERV3-1       | NM_001007253 | 116.1410048 | 2.534748204 | 1.10E-11    | 45.81954316 |
| POLR1D       | NM_152705    | 55.86039251 | 2.94073077  | 3.97E-05    | 18.99541199 |
| SOCS7        | NM_014598    | 48.33140508 | 6.696757042 | 0.001561903 | 7.217135814 |
| ZNF664       | NM_001204298 | 130.3246782 | 5.89672077  | 3.16E-11    | 22.1012124  |
| PGLS         | NM_012088    | 178.6560833 | 20.94949553 | 3.57E-11    | 8.527942024 |
| HP1BP3       | NM_016287    | 143.1968996 | 4.570613154 | 1.75E-12    | 31.32991018 |
| PIGX         | NM_017861    | 169.7669309 | 4.861854862 | 7.14E-15    | 34.91814046 |

|              |              |             |             |             |             |
|--------------|--------------|-------------|-------------|-------------|-------------|
| SNX18        | NM_001145427 | 74.95014928 | 3.122303714 | 5.20E-07    | 24.00475935 |
| RPF1         | NM_025065    | 100.2087285 | 6.138772468 | 7.00E-08    | 16.32390336 |
| INSIG2       | NM_016133    | 74.02713503 | 3.5095528   | 2.76E-06    | 21.09303927 |
| LOC100130950 | NR_034082    | 44.34833603 | 4.727501164 | 0.002499078 | 9.38092546  |
| EREG         | NM_001432    | 58.09485881 | 3.580056149 | 0.000158564 | 16.22735968 |
| SLX4         | NM_032444    | 78.49606764 | 6.941450968 | 1.67E-05    | 11.30830831 |
| BRI3         | NM_015379    | 84.66489013 | 19.32001337 | 0.000680902 | 4.382237658 |
| PLEKHM1P     | NR_024386    | 164.0352591 | 11.82692282 | 4.89E-12    | 13.86964823 |
| TIA1         | NM_022037    | 94.42834386 | 5.001194579 | 8.36E-08    | 18.88115776 |
| DRG1         | NM_004147    | 86.46220574 | 5.861003641 | 5.54E-07    | 14.75211603 |
| CDR2         | NM_001802    | 94.42834386 | 6.020287111 | 7.37E-08    | 15.68502334 |
| ATP9B        | NM_198531    | 47.01995303 | 0.537110545 | 7.04E-05    | 87.5424128  |
| NANS         | NM_018946    | 152.0373391 | 6.85491102  | 1.47E-12    | 22.1793308  |
| ZNF624       | NM_020787    | 68.29546324 | 2.473615008 | 1.85E-06    | 27.60957668 |
| TTC21A       | NM_001105513 | 55.42324183 | 7.335749951 | 0.001627624 | 7.555225054 |
| AMDHD1       | NM_152435    | 44.34833603 | 2.979425725 | 0.000399344 | 14.88486042 |
| ANKIB1       | NM_019004    | 83.79058876 | 2.463959347 | 2.17E-07    | 34.00648183 |
| LAPTM4B      | NM_018407    | 74.95014928 | 6.43167693  | 9.11E-06    | 11.65328267 |
| IL10RB       | NM_000628    | 51.44017277 | 6.602174984 | 0.000789684 | 7.79139797  |
| BNIP2        | NM_004330    | 90.8824255  | 3.595616798 | 6.61E-08    | 25.27589301 |
| DHX30        | NM_138615    | 86.02505507 | 11.9181617  | 1.72E-05    | 7.217980193 |
| CDC34        | NM_004359    | 222.0814051 | 22.31239395 | 3.20E-14    | 9.953275548 |
| ATP6V1C1     | NM_001695    | 75.82445064 | 6.340822725 | 4.45E-06    | 11.95814075 |
| C2orf47      | NM_024520    | 164.9095605 | 9.542758014 | 1.45E-13    | 17.28112148 |
| EFNA1        | NM_182685    | 108.1748666 | 21.44245745 | 2.43E-05    | 5.044891283 |
| ZSCAN25      | NM_145115    | 118.375471  | 10.4862013  | 5.33E-08    | 11.28868954 |
| FAM199X      | NM_207318    | 81.11897176 | 2.826322175 | 1.17E-07    | 28.70124732 |
| DEPDC4       | NM_152317    | 44.78548671 | 1.781552495 | 0.00017048  | 25.13846032 |
| GEMIN4       | NM_015721    | 140.5252827 | 15.12959682 | 3.19E-09    | 9.288104919 |
| STX16-NPEPL1 | NR_037945    | 153.3975041 | 6.193467288 | 4.27E-13    | 24.76762966 |
| GFM1         | NM_024996    | 64.31239418 | 2.86518276  | 5.69E-06    | 22.44617519 |
| SLC30A3      | NM_003459    | 135.2307615 | 18.88109117 | 6.69E-08    | 7.162232322 |
| EIF2D        | NM_006893    | 58.09485881 | 5.239645631 | 0.000186546 | 11.08755494 |
| PCNP         | NM_020357    | 104.1917976 | 5.459574709 | 3.37E-08    | 19.08423332 |
| ACO2         | NM_001098    | 90.00812411 | 14.59978744 | 2.21E-05    | 6.165029763 |
| PGBD2        | NM_170725    | 80.68182108 | 2.706083928 | 1.65E-07    | 29.81497367 |
| RIC8B        | NM_018157    | 79.8075197  | 2.806234832 | 3.75E-07    | 28.43935895 |
| FAM9C        | NM_174901    | 21.2755102  | 0.061283161 | 0.003228011 | 347.1673082 |
| ORAI1        | NM_032790    | 71.8413816  | 11.7209173  | 0.000526944 | 6.129330985 |
| TMEM50A      | NM_014313    | 47.01995303 | 3.914233479 | 0.001998729 | 12.01255706 |
| NACC2        | NM_144653    | 92.19387756 | 9.440484479 | 1.57E-06    | 9.765799389 |
| HAUS3        | NM_024511    | 105.5032497 | 6.538302851 | 1.19E-08    | 16.13618275 |
| BMPR1A       | NM_004329    | 67.37244898 | 3.245075133 | 5.20E-06    | 20.76144503 |
| GPATCH1      | NM_018025    | 43.91118534 | 5.308731251 | 0.004530595 | 8.271502788 |
| NTN1         | NM_004822    | 49.20570646 | 3.204850059 | 0.000372676 | 15.35351282 |
| PANK4        | NM_018216    | 130.7618289 | 15.12960684 | 2.19E-08    | 8.64277772  |
| RSF1         | NM_016578    | 46.58280234 | 2.591207694 | 0.000642546 | 17.97725534 |
| CCDC24       | NM_152499    | 58.09485881 | 10.51434198 | 0.003585565 | 5.525296679 |
| WDFY2        | NM_052950    | 40.36526697 | 2.026910543 | 0.002107225 | 19.91467611 |
| TRAPPC9      | NM_001160372 | 153.3975041 | 4.413734018 | 1.36E-12    | 34.75458727 |
| DNAJC13      | NM_015268    | 75.38729997 | 1.366332484 | 9.13E-07    | 55.17493059 |
| LINC01144    | NR_024270    | 137.8536657 | 16.66323841 | 8.28E-08    | 8.272921642 |
| EMC7         | NM_020154    | 147.1799686 | 1.21434205  | 2.03E-18    | 121.2014099 |
| RRP1B        | NM_015056    | 122.7956908 | 7.453141652 | 1.44E-09    | 16.47569529 |
| XPO5         | NM_020750    | 122.7956908 | 7.660758998 | 2.11E-09    | 16.02918077 |
| RAB11FIP5    | NM_015470    | 52.31447414 | 9.438453361 | 0.003005979 | 5.542695624 |
| PM20D2       | NM_001010853 | 97.97426223 | 3.15185901  | 7.23E-09    | 31.08459545 |
| GPALPP1      | NM_018559    | 60.76647581 | 3.862534101 | 0.000118274 | 15.73228203 |
| SHQ1         | NM_018130    | 66.93529829 | 2.202950446 | 7.32E-06    | 30.38438672 |
| KARS         | NM_001130089 | 43.91118534 | 4.784872572 | 0.003621058 | 9.177085635 |
| ARNT2        | NM_014862    | 49.64285714 | 3.546187331 | 0.000371583 | 13.99893816 |
| ADD3-AS1     | NR_038943    | 82.4791367  | 1.118511115 | 4.47E-08    | 73.74011363 |

|              |              |             |             |             |             |
|--------------|--------------|-------------|-------------|-------------|-------------|
| ABHD14A-ACY1 | NR_037192    | 122.7956908 | 16.77684857 | 3.39E-07    | 7.319353829 |
| SMARCC1      | NM_003074    | 117.064019  | 4.515691754 | 1.68E-09    | 25.92382859 |
| APIAR        | NM_018569    | 105.5032497 | 3.084435237 | 3.99E-10    | 34.20504616 |
| MSN          | NM_002444    | 38.13080067 | 0.919002989 | 0.000401994 | 41.49148711 |
| LY6E         | NM_002346    | 119.6869232 | 23.88592741 | 8.86E-06    | 5.010771451 |
| DSC2         | NM_004949    | 62.07792787 | 1.93644881  | 6.38E-06    | 32.05761368 |
| PLA2G15      | NM_012320    | 83.35343807 | 13.66571732 | 6.73E-05    | 6.099455748 |
| SBDS         | NM_016038    | 78.49606764 | 5.088280983 | 2.48E-06    | 15.42683431 |
| NAGK         | NM_017567    | 181.3277003 | 14.39390621 | 1.09E-12    | 12.59753244 |
| ZFYVE9       | NM_007324    | 115.2667034 | 3.060776169 | 3.26E-10    | 37.65930503 |
| STK38L       | NM_015000    | 115.2667034 | 1.354931531 | 4.50E-11    | 85.07197649 |
| MRPS5        | NM_031902    | 120.1240738 | 2.619535905 | 6.74E-12    | 45.85700603 |
| NUP160       | NM_015231    | 108.6120173 | 3.773481376 | 4.90E-09    | 28.78297426 |
| ZFR          | NM_016107    | 91.75672686 | 3.109707761 | 2.86E-08    | 29.50654335 |
| C9orf78      | NM_016520    | 93.11689181 | 6.689748371 | 2.90E-07    | 13.91934145 |
| RTTN         | NM_173630    | 111.7207851 | 1.971931396 | 4.60E-10    | 56.65551311 |
| ANO9         | NM_001012302 | 99.28571429 | 11.71438053 | 2.92E-06    | 8.475541158 |
| CPSF1        | NM_013291    | 204.8376768 | 40.97706786 | 3.96E-09    | 4.998836849 |
| LUZP1        | NM_033631    | 112.1579357 | 5.69756631  | 4.12E-09    | 19.6852357  |
| RELT         | NM_152222    | 149.8515857 | 16.51016642 | 3.66E-09    | 9.076321939 |
| RTN4IP1      | NM_032730    | 50.12872071 | 3.469522566 | 0.000166231 | 14.44830514 |
| MSRB2        | NM_012228    | 90.4452748  | 2.728396185 | 5.45E-09    | 33.14961195 |
| CEP72        | NM_018140    | 85.10204081 | 7.52374373  | 3.54E-06    | 11.31112965 |
| CERS2        | NM_181746    | 102.394482  | 22.08887416 | 9.39E-05    | 4.635568169 |
| WDR25        | NM_001161476 | 46.14565165 | 6.772129884 | 0.002924982 | 6.814052956 |
| CCT5         | NM_012073    | 72.71568297 | 12.81888348 | 0.000557625 | 5.672544188 |
| NUP214       | NM_005085    | 104.6289483 | 4.352462568 | 1.37E-08    | 24.03902311 |
| DIS3L        | NM_001143688 | 132.9962952 | 7.187755466 | 1.39E-10    | 18.50317472 |
| AHCY         | NM_000687    | 99.7715779  | 15.37418736 | 1.08E-05    | 6.489551321 |
| ARV1         | NM_022786    | 39.9281163  | 1.070791367 | 0.000681034 | 37.28841821 |
| RNMT         | NM_003799    | 69.60691528 | 2.638261726 | 2.26E-06    | 26.38362775 |
| GLUD1        | NM_005271    | 40.80241766 | 3.657507571 | 0.001885547 | 11.15579855 |
| GRK6         | NM_001004105 | 115.2667034 | 20.22091577 | 6.05E-06    | 5.700370085 |
| PITHD1       | NM_020362    | 180.4046861 | 11.09006052 | 7.43E-14    | 16.2672409  |
| NFE2L1       | NM_003204    | 189.7309891 | 27.43772524 | 2.38E-10    | 6.914967892 |
| C6orf165     | NM_001031743 | 40.80241766 | 3.250447631 | 0.001926948 | 12.55286111 |
| SLAH1        | NM_003031    | 119.6869232 | 3.263423961 | 4.56E-11    | 36.67526028 |
| RPL26        | NM_000987    | 103.3174962 | 19.36447418 | 4.91E-05    | 5.335414493 |
| NOA1         | NM_032313    | 72.27853228 | 4.652584569 | 4.56E-06    | 15.53513562 |
| GNG12        | NM_018841    | 83.35343807 | 4.018286868 | 2.43E-07    | 20.74352599 |
| FAM81A       | NM_152450    | 84.66489013 | 2.610389691 | 8.67E-08    | 32.43381263 |
| ZBTB26       | NM_020924    | 82.91628738 | 2.688874398 | 8.23E-08    | 30.83680198 |
| BPIFB1       | NM_033197    | 62.95222924 | 6.801621381 | 0.000284553 | 9.25547391  |
| USP42        | NM_032172    | 63.82653061 | 6.140277898 | 8.76E-05    | 10.39472996 |
| RPS10-NUDT3  | NM_001202470 | 73.63869723 | 5.35069974  | 9.89E-06    | 13.76244245 |
| FOXN3        | NM_001085471 | 40.80241766 | 1.803313784 | 0.002226687 | 22.6263549  |
| CLMN         | NM_024734    | 56.73469387 | 3.819054848 | 5.91E-05    | 14.85568973 |
| NUP188       | NM_015354    | 104.6289483 | 6.674993479 | 6.92E-08    | 15.67476412 |
| DDX55        | NM_020936    | 185.74792   | 7.437895855 | 1.65E-15    | 24.97318108 |
| SLC25A4      | NM_001151    | 112.5950864 | 8.489355046 | 2.58E-08    | 13.26309075 |
| IL10RA       | NM_001558    | 80.2446704  | 6.935844958 | 5.28E-06    | 11.56955942 |
| NUDT14       | NM_177533    | 85.10204081 | 17.62341074 | 0.00024089  | 4.828920014 |
| NARFL        | NM_022493    | 92.67974111 | 22.11784487 | 0.000681194 | 4.190269967 |
| RGPD8        | NM_001164463 | 81.55612244 | 1.945650116 | 1.01E-07    | 41.91715755 |
| RNASET2      | NM_003730    | 94.42834386 | 3.734536428 | 3.72E-08    | 25.28515806 |
| SPAG7        | NM_004890    | 96.66281017 | 10.77834032 | 1.63E-06    | 8.968246253 |
| BMP7         | NM_001719    | 80.2446704  | 5.114408591 | 2.83E-06    | 15.68992171 |
| HECTD4       | NM_001109662 | 43.91118534 | 4.104858667 | 0.001242449 | 10.69736839 |
| LARS2        | NM_015340    | 61.64077717 | 4.01985536  | 1.80E-05    | 15.33407838 |
| TMEM260      | NM_017799    | 143.1968996 | 1.916856456 | 7.28E-14    | 74.70402866 |
| HDAC1        | NM_004964    | 104.1917976 | 8.488191214 | 1.16E-07    | 12.27491169 |
| SNAPC3       | NM_001039697 | 58.96916018 | 4.42220545  | 0.000125894 | 13.33478529 |

|            |              |             |             |             |             |
|------------|--------------|-------------|-------------|-------------|-------------|
| ABTB2      | NM_145804    | 68.73261391 | 7.617090334 | 0.000140689 | 9.02347365  |
| RNASEH2B   | NM_001142279 | 103.3174962 | 4.471101503 | 1.73E-08    | 23.10783956 |
| TTL12      | NM_015140    | 131.1989796 | 18.76266352 | 1.05E-07    | 6.992556222 |
| SEC22A     | NM_012430    | 98.41141291 | 3.677441271 | 7.71E-09    | 26.76083876 |
| POLRMT     | NM_005035    | 67.85831254 | 16.02623383 | 0.002520788 | 4.234202075 |
| CMTM6      | NM_017801    | 119.2497724 | 4.513108172 | 7.37E-11    | 26.42298121 |
| BMP1       | NR_033404    | 80.2446704  | 11.00357076 | 4.67E-05    | 7.292602751 |
| B4GALT1    | NM_001497    | 73.58998434 | 8.438337733 | 4.04E-05    | 8.72091005  |
| ZKSCAN2    | NM_001012981 | 34.14773161 | 2.508620808 | 0.004742173 | 13.61215354 |
| AEN        | NM_022767    | 139.2138305 | 23.93508701 | 3.92E-07    | 5.816307686 |
| THRAP3     | NM_005119    | 126.3416091 | 7.049444147 | 1.47E-09    | 17.92220869 |
| FARSA      | NM_004461    | 126.3416091 | 12.88017817 | 2.82E-08    | 9.808995455 |
| INPP5E     | NM_019892    | 129.4503768 | 19.7879747  | 3.22E-07    | 6.541870947 |
| ZNF672     | NM_024836    | 148.4914208 | 7.638333509 | 1.90E-12    | 19.4402903  |
| SRPR       | NM_001177842 | 96.22565948 | 17.74151616 | 5.46E-05    | 5.423756267 |
| CSTF2T     | NM_015235    | 69.60691528 | 8.172507944 | 0.000188324 | 8.517203747 |
| MICALL2    | NM_182924    | 174.6730143 | 23.09602905 | 5.83E-10    | 7.562902431 |
| RNF115     | NM_014455    | 118.375471  | 3.254132783 | 8.68E-11    | 36.37696397 |
| CCDC101    | NM_138414    | 180.4046861 | 6.457025499 | 5.40E-15    | 27.93928661 |
| ADO        | NM_032804    | 83.35343807 | 11.71648809 | 3.35E-05    | 7.11419987  |
| EFCAB14    | NM_014774    | 63.87524348 | 3.427943672 | 1.14E-05    | 18.6336911  |
| AKAP10     | NM_007202    | 146.742818  | 2.678213926 | 9.33E-14    | 54.79129826 |
| OSMR       | NM_001168355 | 37.69364998 | 3.03638566  | 0.003261163 | 12.4139863  |
| TRIP13     | NM_004237    | 75.82445064 | 5.802738069 | 2.78E-06    | 13.06701246 |
| PDCL3      | NM_024065    | 76.69875203 | 4.145979997 | 9.14E-07    | 18.49954705 |
| HECA       | NM_016217    | 42.11386972 | 2.346654867 | 0.000897754 | 17.94634154 |
| DDX20      | NM_007204    | 41.23956835 | 2.061841776 | 0.000709781 | 20.00132544 |
| LOC93622   | NR_015433    | 87.33650713 | 18.89348881 | 0.000689169 | 4.622571724 |
| SOS2       | NM_006939    | 47.8942544  | 2.48292567  | 0.000333006 | 19.28944349 |
| TTC23L     | NM_144725    | 40.80241766 | 0.935195548 | 0.000177638 | 43.62982455 |
| KRT33A     | NM_004138    | 44.34833603 | 6.517298633 | 0.003319657 | 6.804711357 |
| PSMD12     | NM_174871    | 180.453399  | 5.959871724 | 1.36E-15    | 30.2780676  |
| NCAPD3     | NM_015261    | 61.2036265  | 4.12378759  | 0.000151243 | 14.84160499 |
| ZFAND2A    | NM_182491    | 58.09485881 | 11.39790666 | 0.004886137 | 5.096976186 |
| SOX13      | NM_005686    | 121.9213894 | 12.27989789 | 5.85E-08    | 9.928534463 |
| ATP5C1     | NM_001001973 | 71.40423091 | 2.621867939 | 4.92E-07    | 27.23410659 |
| PIGQ       | NM_148920    | 84.22773945 | 13.07074339 | 6.16E-05    | 6.44398998  |
| TTC32      | NM_001008237 | 109.4863187 | 11.72486688 | 1.94E-07    | 9.337958363 |
| FAM171A1   | NM_001010924 | 42.55102041 | 3.192042707 | 0.001198464 | 13.33034183 |
| BBS10      | NM_024685    | 69.1697646  | 8.974866763 | 0.000206456 | 7.707051974 |
| RPL7       | NM_000971    | 144.1199138 | 18.91249577 | 5.27E-08    | 7.620354055 |
| COX16      | NM_001204090 | 61.2036265  | 4.459907218 | 0.00012017  | 13.72307169 |
| ERICH6     | NM_152394    | 45.22263741 | 2.901345675 | 0.000505403 | 15.58678023 |
| FAM220A    | NM_001037163 | 140.0881319 | 8.085476039 | 8.17E-11    | 17.32589785 |
| BEND2      | NM_153346    | 24.38427789 | 0.26946298  | 0.0037149   | 90.49212597 |
| NOL9       | NM_024654    | 82.04198601 | 5.785912388 | 9.86E-07    | 14.17961084 |
| RAB11FIP1  | NM_025151    | 98.41141291 | 3.6342727   | 3.25E-08    | 27.07870901 |
| ZNF213-AS1 | NR_110900    | 66.06099693 | 14.03016465 | 0.003189794 | 4.708497626 |
| CIDECP     | NR_002786    | 75.38729997 | 6.697440111 | 8.87E-06    | 11.25613648 |
| TMEM241    | NM_032933    | 39.9281163  | 3.654454232 | 0.002170594 | 10.92587669 |
| TMEM98     | NM_015544    | 49.20570646 | 2.081078694 | 8.66E-05    | 23.64432763 |
| XRCC6BP1   | NM_033276    | 135.6679122 | 3.711913834 | 3.87E-13    | 36.54931615 |
| XPO1       | NM_003400    | 111.2836343 | 8.140847176 | 2.45E-08    | 13.66978545 |
| CAPN7      | NM_014296    | 122.3585401 | 2.70980869  | 7.43E-12    | 45.1539404  |
| ZBED5-AS1  | NR_034137    | 100.6458792 | 2.304651079 | 2.24E-10    | 43.67076653 |
| ALG6       | NM_013339    | 138.3395291 | 2.414332865 | 5.01E-13    | 57.29927764 |
| C9orf89    | NM_032310    | 58.09485881 | 9.705245105 | 0.002550428 | 5.985923919 |
| STT3B      | NM_178862    | 87.77365781 | 4.402871475 | 4.73E-07    | 19.93554849 |
| TTC33      | NM_012382    | 36.38219793 | 1.180647227 | 0.002450636 | 30.81546893 |
| HIF1A-AS1  | NR_047116    | 143.1968996 | 3.350474738 | 2.04E-14    | 42.73928646 |
| RCCD1      | NM_033544    | 86.89935644 | 18.88531639 | 0.000606053 | 4.601424443 |
| MPP5       | NM_001256550 | 47.8942544  | 4.047202901 | 0.000349417 | 11.83391482 |

|             |              |             |             |             |             |
|-------------|--------------|-------------|-------------|-------------|-------------|
| IMPACT      | NM_018439    | 132.9962952 | 2.524146447 | 7.05E-14    | 52.68961133 |
| CNOT11      | NM_017546    | 104.1917976 | 2.454021728 | 6.04E-10    | 42.45756931 |
| ARHGEF35    | NM_001003702 | 78.05891695 | 6.479267577 | 5.13E-06    | 12.04749087 |
| NPAS2       | NM_002518    | 52.75162482 | 5.251294347 | 0.000969465 | 10.04545191 |
| LENG8       | NM_052925    | 199.4944428 | 30.75609945 | 1.01E-10    | 6.486337553 |
| SDHB        | NM_003000    | 66.06099693 | 5.037474757 | 3.83E-05    | 13.11391126 |
| OLA1        | NM_001011708 | 62.07792787 | 5.348658481 | 0.000101964 | 11.60626129 |
| EML5        | NM_183387    | 34.14773161 | 0.448477741 | 0.00086476  | 76.14141901 |
| PSMD1       | NR_034059    | 108.1748666 | 5.014276103 | 8.24E-09    | 21.57337658 |
| OAF         | NM_178507    | 56.73469387 | 10.3507231  | 0.002677465 | 5.481229991 |
| MEGF8       | NM_001271938 | 64.31239418 | 10.43577572 | 0.0007012   | 6.162684588 |
| DR1         | NM_001938    | 97.97426223 | 7.635427363 | 1.49E-07    | 12.83153615 |
| LOC145783   | NR_015419    | 43.91118534 | 4.488505683 | 0.00407675  | 9.783029908 |
| ZSWIM1      | NM_080603    | 72.27853228 | 7.466589952 | 8.15E-05    | 9.680260031 |
| LANCL2      | NM_018697    | 71.8413816  | 4.54422546  | 1.44E-05    | 15.80937879 |
| MTG1        | NM_138384    | 70.48121666 | 4.337540533 | 8.23E-06    | 16.24912001 |
| USP32       | NM_032582    | 54.54894044 | 4.472815104 | 0.000556245 | 12.19566183 |
| OAZ1        | NM_004152    | 217.6611853 | 47.42556083 | 1.00E-08    | 4.589533186 |
| CDH1        | NM_004360    | 126.3416091 | 6.805914255 | 1.60E-09    | 18.56350292 |
| ZNF519      | NR_033354    | 105.066099  | 2.438874906 | 5.18E-10    | 43.07974088 |
| RRN3P2      | NR_003369    | 39.00510204 | 2.043459274 | 0.001574676 | 19.08778048 |
| DNPH1       | NM_006443    | 83.35343807 | 17.27930362 | 0.000458695 | 4.823888735 |
| VPS26B      | NM_052875    | 69.60691528 | 5.986354092 | 1.77E-05    | 11.6275974  |
| MAN1A1      | NM_005907    | 93.99119317 | 4.579014679 | 1.71E-07    | 20.52651056 |
| POLG2       | NM_007215    | 66.54686048 | 8.600902825 | 0.000153229 | 7.737194785 |
| LMNTD2      | NM_173573    | 97.97426223 | 17.23061219 | 5.14E-05    | 5.686058112 |
| GGCX        | NM_000821    | 97.97426223 | 15.95271312 | 1.56E-05    | 6.141542289 |
| UTP11L      | NM_016037    | 116.5781554 | 5.238669673 | 3.10E-10    | 22.25338926 |
| PPTC7       | NM_139283    | 65.18669554 | 5.506722231 | 4.53E-05    | 11.8376582  |
| TCTE3       | NM_174910    | 144.071201  | 3.593457553 | 6.54E-14    | 40.09264027 |
| TRNT1       | NM_182916    | 126.3416091 | 3.261311597 | 7.50E-12    | 38.73950874 |
| SCYL1       | NM_001048218 | 97.53711154 | 20.42701989 | 0.000119021 | 4.774906574 |
| ARID2       | NM_152641    | 49.25441934 | 2.259309485 | 0.000351888 | 21.80065178 |
| RRP8        | NM_015324    | 72.27853228 | 12.31045565 | 0.000442717 | 5.871312511 |
| LINC00888   | NR_038302    | 86.89935644 | 7.428545398 | 2.90E-06    | 11.69803128 |
| CDK12       | NM_016507    | 111.2836343 | 4.258145445 | 3.06E-09    | 26.1342962  |
| SYS1-DBNDD2 | NR_003189    | 63.43809281 | 6.017727528 | 8.31E-05    | 10.54186859 |
| UBR2        | NM_001184801 | 121.9213894 | 3.388484034 | 1.62E-11    | 35.98110193 |
| SMIM13      | NM_001135575 | 97.97426223 | 3.98622292  | 4.04E-08    | 24.57821958 |
| SHB         | NM_003028    | 155.1461068 | 9.541249938 | 7.59E-12    | 16.26056416 |
| FBXL8       | NM_018378    | 93.55404248 | 13.76361759 | 1.32E-05    | 6.797198621 |
| THOP1       | NM_003249    | 142.759749  | 15.89143453 | 3.81E-09    | 8.983440024 |
| DGCR8       | NM_001190326 | 123.2328415 | 18.56366422 | 6.58E-07    | 6.638389923 |
| ACTR8       | NM_022899    | 43.03688397 | 5.722066059 | 0.003497367 | 7.521214108 |
| ACTR5       | NM_024855    | 86.02505507 | 4.282611129 | 2.78E-07    | 20.08705728 |
| NDUFV2      | NM_021074    | 146.3056673 | 3.500366738 | 2.15E-13    | 41.79723961 |
| NUAK2       | NM_030952    | 76.69875203 | 13.15059694 | 0.000213452 | 5.832339961 |
| CYP4X1      | NM_178033    | 27.05589488 | 0.952470458 | 0.004833173 | 28.40602001 |
| TSR2        | NM_058163    | 69.60691528 | 8.28142242  | 7.80E-05    | 8.405188354 |
| SGK223      | NM_001080826 | 59.40631088 | 5.750482338 | 0.000158992 | 10.33066574 |
| KIAA1804    | NM_032435    | 98.8485636  | 2.911496328 | 2.57E-09    | 33.95112082 |
| PRKAA1      | NM_006251    | 67.37244898 | 1.791699731 | 1.54E-06    | 37.60253341 |
| CAT         | NM_001752    | 82.91628738 | 4.333805966 | 7.77E-07    | 19.1324411  |
| PFDN1       | NM_002622    | 76.26160134 | 4.576324599 | 4.05E-06    | 16.66437764 |
| MIA3        | NM_198551    | 74.46428571 | 4.162063401 | 6.60E-06    | 17.89119447 |
| STK11       | NM_000455    | 101.9573313 | 24.27913848 | 0.000145055 | 4.199380113 |
| LIN7C       | NM_018362    | 112.1579357 | 6.047152069 | 1.97E-09    | 18.54723255 |
| CERS4       | NM_024552    | 58.96916018 | 8.786074156 | 0.000627641 | 6.711662016 |
| SOCS1       | NM_003745    | 219.4097881 | 20.88865291 | 5.84E-13    | 10.50377873 |
| NKIRAS1     | NM_020345    | 54.54894044 | 2.296049001 | 4.29E-05    | 23.75774229 |
| KIF5C       | NM_004522    | 31.47611462 | 0.45153557  | 0.001885794 | 69.70904772 |
| KPNA4       | NM_002268    | 90.00812411 | 3.597943005 | 2.67E-08    | 25.01655084 |

|              |              |             |             |             |             |
|--------------|--------------|-------------|-------------|-------------|-------------|
| LPP-AS2      | NR_036497    | 91.75672686 | 16.60597891 | 0.000123123 | 5.525523508 |
| CENPT        | NM_025082    | 119.2497724 | 21.00949526 | 2.65E-06    | 5.67599416  |
| KBTBD8       | NM_032505    | 38.13080067 | 0.852453508 | 0.000677782 | 44.73065134 |
| 7-Sep        | NM_001011553 | 44.78548671 | 3.342117411 | 0.000632733 | 13.40033314 |
| OTUD7B       | NM_020205    | 116.1410048 | 5.478846258 | 1.08E-09    | 21.19807698 |
| CCDC130      | NM_030818    | 106.8634146 | 13.24689604 | 7.28E-07    | 8.067053167 |
| SS18L2       | NM_016305    | 88.2108085  | 13.93457919 | 4.69E-05    | 6.330353241 |
| MRPS26       | NM_030811    | 147.6171194 | 35.07288451 | 7.72E-06    | 4.208867376 |
| YAE1D1       | NM_020192    | 65.18669554 | 6.964825469 | 0.000177638 | 9.359415513 |
| HEATR2       | NR_075098    | 97.09996085 | 7.676211561 | 4.22E-07    | 12.64946388 |
| NOP58        | NM_015934    | 135.6679122 | 7.198405129 | 1.27E-10    | 18.84694037 |
| ZNF800       | NM_176814    | 74.51299858 | 4.805181155 | 4.03E-06    | 15.50680322 |
| DIAPH1       | NM_005219    | 96.22565948 | 4.228266646 | 7.83E-08    | 22.75770843 |
| TMEM19       | NM_018279    | 85.58790438 | 1.44593298  | 2.07E-09    | 59.19216559 |
| SOWAHC       | NM_023016    | 112.1579357 | 12.91970304 | 3.20E-07    | 8.68115431  |
| LOC101928068 | NR_111907    | 86.89935644 | 20.37905542 | 0.001097414 | 4.264150358 |
| TXNL1        | NR_024546    | 55.42324183 | 0.532061974 | 9.38E-07    | 104.1668914 |
| SDSL         | NM_138432    | 60.32932513 | 8.734846148 | 0.00044724  | 6.906741585 |
| EIF2AK3      | NM_004836    | 40.36526697 | 2.272962366 | 0.001878776 | 17.75888047 |
| PDXDC2P      | NR_003610    | 64.74954487 | 3.18510292  | 8.11E-06    | 20.32887053 |
| FLJ30679     | NR_026674    | 81.60483533 | 16.75806025 | 0.000828527 | 4.869587179 |
| LRRC8A       | NM_019594    | 114.8295527 | 12.26907455 | 2.43E-07    | 9.359267664 |
| TYMS         | NM_001071    | 132.5591446 | 15.10961237 | 1.88E-08    | 8.773166469 |
| NEK9         | NM_033116    | 89.13382275 | 3.18899035  | 3.02E-08    | 27.95048369 |
| MRPS14       | NR_037606    | 39.49096561 | 3.41626855  | 0.004157157 | 11.55967836 |
| EIF2AK4      | NM_001013703 | 110.4093329 | 2.932034197 | 3.64E-10    | 37.65622278 |
| SLX4IP       | NM_001009608 | 48.76855577 | 3.161126876 | 0.00036727  | 15.42758569 |
| FANCL        | NM_018062    | 94.86549455 | 2.401747822 | 1.15E-08    | 39.49852423 |
| MIR17HG      | NR_027349    | 67.37244898 | 8.309592678 | 0.000123214 | 8.107791993 |
| SFMBT1       | NM_016329    | 58.5320095  | 3.351820068 | 5.83E-05    | 17.46275406 |
| ERI1         | NM_153332    | 42.59973328 | 4.150917431 | 0.003944753 | 10.26272721 |
| LOC101928438 | NR_109802    | 118.375471  | 2.034330604 | 1.52E-10    | 58.18890536 |
| FLJ10038     | NR_026891    | 146.742818  | 16.46457165 | 1.93E-09    | 8.912641099 |
| DLG5-AS1     | NR_024585    | 63.38937993 | 12.55185563 | 0.002055471 | 5.050199889 |
| ZCRB1        | NM_033114    | 54.98609113 | 1.397840404 | 9.89E-06    | 39.33645857 |
| ATF1         | NM_005171    | 54.98609113 | 3.52112861  | 8.84E-05    | 15.61604168 |
| M6PR         | NM_001207024 | 73.58998434 | 7.814914037 | 4.84E-05    | 9.416608293 |
| DIP2B        | NM_173602    | 94.42834386 | 4.159538954 | 1.81E-07    | 22.70163711 |
| UBN2         | NM_173569    | 62.95222924 | 2.94989885  | 1.39E-05    | 21.34047045 |
| SLC38A2      | NM_018976    | 132.5591446 | 17.62553982 | 7.14E-08    | 7.52085587  |
| KCMF1        | NM_020122    | 95.30264523 | 4.768660869 | 1.38E-07    | 19.98520085 |
| PFDN4        | NM_002623    | 79.8075197  | 3.368269197 | 2.24E-07    | 23.69392558 |
| COX5A        | NM_004255    | 111.2836343 | 4.182130999 | 3.20E-10    | 26.60931337 |
| FAHD2A       | NM_016044    | 82.91628738 | 7.393853526 | 1.86E-06    | 11.21421828 |
| GNB1         | NM_001282538 | 147.6171194 | 7.443119445 | 1.77E-11    | 19.83269522 |
| AARS2        | NM_020745    | 169.8156438 | 13.50457091 | 6.00E-12    | 12.57467897 |
| B3GALNT2     | NM_001277155 | 121.9213894 | 4.422184986 | 1.24E-10    | 27.57039559 |
| LIMD1        | NM_014240    | 55.86039251 | 6.673784681 | 0.000302855 | 8.370122078 |
| HUS1         | NM_004507    | 151.6001885 | 6.031031512 | 2.66E-13    | 25.13669315 |
| CBL          | NM_005188    | 116.1410048 | 4.436226354 | 1.21E-09    | 26.18013498 |
| CBX3P2       | NR_033754    | 105.066099  | 0.238378974 | 7.00E-14    | 440.7523744 |
| RSBN1L       | NM_198467    | 86.46220574 | 2.583446452 | 8.46E-08    | 33.46777544 |
| GINM1        | NM_138785    | 79.8075197  | 5.853159141 | 1.46E-06    | 13.63494786 |
| SETX         | NM_015046    | 131.2476924 | 3.215569436 | 4.39E-12    | 40.81631419 |
| CYP51A1-AS1  | NR_122109    | 66.06099693 | 3.142469703 | 5.88E-06    | 21.02199963 |
| LYPD6B       | NM_177964    | 31.03896394 | 0.903906573 | 0.00199865  | 34.33868596 |
| HACE1        | NR_104424    | 97.97426223 | 1.382477143 | 5.48E-09    | 70.86863079 |
| ANKRD13C     | NM_030816    | 129.8875276 | 3.225413223 | 8.50E-12    | 40.2700425  |
| PSMD5        | NM_001270427 | 87.82237075 | 4.008848624 | 1.55E-07    | 21.9071307  |
| LINC01136    | NR_034151    | 65.62384623 | 11.0899063  | 0.000879024 | 5.917439196 |
| ARL4D        | NM_001661    | 136.1050629 | 18.22265227 | 1.31E-07    | 7.469004008 |
| SLC39A14     | NM_001135153 | 67.42116185 | 7.091378788 | 0.00011696  | 9.5074828   |

|              |              |             |             |             |             |
|--------------|--------------|-------------|-------------|-------------|-------------|
| TRADD        | NM_003789    | 87.33650713 | 20.37116899 | 0.000674261 | 4.287260449 |
| PEAK1        | NM_024776    | 109.049168  | 1.56040312  | 9.62E-10    | 69.88525376 |
| NUDCD2       | NM_145266    | 70.96708023 | 5.869015331 | 9.47E-06    | 12.09182056 |
| AMER1        | NM_152424    | 45.22263741 | 0.890775832 | 0.000107371 | 50.76769685 |
| SAV1         | NM_021818    | 99.7715779  | 2.412643205 | 8.48E-10    | 41.35363973 |
| EHBP1L1      | NM_001099409 | 84.66489013 | 20.73028851 | 0.000871486 | 4.084115379 |
| GABPB1       | NM_002041    | 113.9552513 | 3.445787829 | 1.55E-10    | 33.07088451 |
| C5orf28      | NM_022483    | 96.22565948 | 1.55675487  | 8.86E-10    | 61.81169644 |
| DNAJC17      | NM_018163    | 51.87732345 | 7.273794457 | 0.002894511 | 7.132085428 |
| ANKRD50      | NM_001167882 | 104.1917976 | 2.984526848 | 1.10E-09    | 34.9106585  |
| LOC100130987 | NR_024469    | 69.60691528 | 11.78990422 | 0.000444288 | 5.903942389 |
| MTHFD2       | NR_027405    | 197.2599765 | 9.635409185 | 1.18E-15    | 20.47240265 |
| ARPC5L       | NM_030978    | 165.3467113 | 21.30503022 | 1.48E-09    | 7.760923571 |
| INADL        | NM_176877    | 155.5832575 | 1.517967255 | 7.33E-14    | 102.4944754 |
| MANBAL       | NM_001003897 | 167.1440268 | 10.2677654  | 5.51E-13    | 16.27852022 |
| COX20        | NM_198076    | 137.8536657 | 10.15011585 | 2.36E-10    | 13.58148692 |
| CCDC18       | NM_206886    | 110.4093329 | 3.321987869 | 3.93E-10    | 33.23592297 |
| LINC00467    | NR_026761    | 98.41141291 | 2.507248406 | 3.37E-09    | 39.25076298 |
| SUPT6H       | NM_003170    | 84.71360301 | 6.632043607 | 3.26E-06    | 12.77337847 |
| CASQ2        | NM_001232    | 42.11386972 | 1.948851529 | 0.000961895 | 21.60958344 |
| DCAF15       | NM_138353    | 117.5011696 | 17.37898929 | 6.16E-07    | 6.761104901 |
| DNAJC27-AS1  | NR_034113    | 105.5032497 | 3.573252493 | 1.06E-09    | 29.52583112 |
| KRT26        | NM_181539    | 37.2564993  | 2.613262535 | 0.004236656 | 14.25669974 |
| GUF1         | NM_021927    | 61.2036265  | 5.761201186 | 0.000109536 | 10.6234142  |
| KIAA1161     | NM_020702    | 82.04198601 | 9.250475413 | 1.00E-05    | 8.868948065 |
| JAG1         | NM_000214    | 49.20570646 | 5.440930798 | 0.001400297 | 9.043619242 |
| NMD3         | NM_015938    | 55.42324183 | 4.883992702 | 0.000396571 | 11.34793707 |
| RPL24        | NM_000986    | 115.7038541 | 13.76931129 | 3.12E-07    | 8.403024065 |
| PKD2         | NM_000297    | 116.5781554 | 3.210755067 | 7.54E-11    | 36.30864174 |
| HEYL         | NM_014571    | 75.38729997 | 9.155769762 | 8.98E-05    | 8.233857112 |
| FBXL3        | NM_012158    | 80.68182108 | 2.521688024 | 6.08E-08    | 31.99516368 |
| COX10        | NM_001303    | 80.2446704  | 0.622468236 | 1.05E-08    | 128.913679  |
| DCUN1D2      | NM_001014283 | 118.8126218 | 8.065813652 | 2.73E-09    | 14.73039509 |
| ARHGEF37     | NM_001001669 | 79.8075197  | 6.406667756 | 2.48E-06    | 12.45694685 |
| C10orf76     | NM_024541    | 136.1537757 | 4.769410967 | 3.04E-11    | 28.54729372 |
| UBASH3B      | NM_032873    | 60.76647581 | 5.457606169 | 0.000178804 | 11.13427278 |
| XYLB         | NM_005108    | 78.93321834 | 5.007540174 | 2.48E-06    | 15.76287271 |
| PPIL1        | NM_016059    | 140.0881319 | 4.994231466 | 4.39E-12    | 28.04998785 |
| CDC37L1      | NM_017913    | 103.3174962 | 4.147259    | 5.88E-09    | 24.9122363  |
| GPATCH11     | NM_174931    | 47.8942544  | 1.44643253  | 5.95E-05    | 33.11198649 |
| CTC-338M12.4 | NR_109909    | 101.0830299 | 16.7953663  | 2.05E-05    | 6.018507017 |
| MAGEA6       | NM_005363    | 59.84346156 | 4.711842729 | 3.69E-05    | 12.70064919 |
| CTBS         | NM_004388    | 148.05427   | 2.149905575 | 2.62E-15    | 68.86547566 |
| ANP32B       | NM_006401    | 62.07792787 | 10.19698552 | 0.001081102 | 6.087870552 |
| HSPA12A      | NM_025015    | 179.9675353 | 8.217893571 | 2.56E-14    | 21.89947263 |
| TMEM8A       | NM_021259    | 66.93529829 | 9.030539676 | 0.000385926 | 7.412103893 |
| SMYD5        | NM_006062    | 97.09996085 | 11.20365967 | 2.93E-06    | 8.666807428 |
| PCOLCE2      | NM_013363    | 70.48121666 | 4.911329081 | 1.50E-05    | 14.35074203 |
| APPBP2       | NM_006380    | 74.07584791 | 5.291089535 | 8.85E-06    | 14.00011234 |
| PRKAB1       | NM_006253    | 81.60483533 | 7.268223447 | 2.61E-06    | 11.22761785 |
| SLC7A5       | NM_003486    | 293.4369232 | 17.50499887 | 1.32E-21    | 16.76303583 |
| NUMBL        | NM_004756    | 62.95222924 | 14.14333734 | 0.002897825 | 4.451016597 |
| CRACR2A      | NM_032680    | 47.01995303 | 0.537200457 | 4.12E-05    | 87.52776067 |
| RNF139       | NM_007218    | 128.1389248 | 6.820052105 | 5.67E-11    | 18.7885551  |
| THUMPD1      | NM_017736    | 75.82445064 | 3.748445496 | 2.69E-07    | 20.22823881 |
| COQ5         | NM_032314    | 86.46220574 | 4.660027616 | 3.39E-07    | 18.55401145 |
| MGME1        | NM_052865    | 89.57097344 | 3.69013871  | 1.02E-07    | 24.2730641  |
| LOC100288846 | NR_038935    | 51.00302207 | 3.856680809 | 0.000548467 | 13.2245899  |
| TIMM17A      | NM_006335    | 70.09277885 | 4.10569173  | 4.19E-06    | 17.07209977 |
| SEC61A1      | NM_013336    | 136.9793643 | 16.52358797 | 3.00E-08    | 8.289928585 |
| PABPC1L      | NM_001124756 | 112.5950864 | 9.582827688 | 7.87E-08    | 11.74967244 |
| ATPIA3       | NM_001256214 | 58.5320095  | 11.03947362 | 0.002948722 | 5.302065254 |



|              |              |             |             |             |             |
|--------------|--------------|-------------|-------------|-------------|-------------|
| GNB2L1       | NM_006098    | 226.9874884 | 34.82943347 | 1.97E-11    | 6.517116869 |
| PREP         | NM_002726    | 137.8536657 | 4.016685359 | 1.98E-11    | 34.32025497 |
| MEMO1        | NM_015955    | 52.31447414 | 3.379634539 | 0.00019669  | 15.47932877 |
| EFNB1        | NM_004429    | 62.51507855 | 7.874187143 | 0.000210296 | 7.939242161 |
| CCS          | NM_005125    | 136.1050629 | 7.450591306 | 4.32E-11    | 18.26768605 |
| TNKS2        | NM_025235    | 93.11689181 | 4.21968756  | 1.11E-07    | 22.06724799 |
| MICU2        | NM_152726    | 161.3636422 | 0.793806955 | 8.49E-18    | 203.2781915 |
| LOC100507250 | NR_038930    | 55.86039251 | 4.539046082 | 0.000112817 | 12.30663701 |
| BAG2         | NM_004282    | 111.7207851 | 7.490578842 | 1.79E-08    | 14.91484002 |
| BRAP         | NM_006768    | 82.4791367  | 3.988315241 | 9.21E-07    | 20.68019495 |
| SGPL1        | NM_003901    | 81.11897176 | 4.794420834 | 2.40E-06    | 16.91945171 |
| KRTCAP2      | NM_173852    | 116.1410048 | 20.29322225 | 4.35E-06    | 5.723142599 |
| CERK         | NM_022766    | 127.2159105 | 6.689663154 | 5.81E-10    | 19.01678868 |
| SLC25A30-AS1 | NR_047031    | 58.09485881 | 3.357521433 | 5.65E-05    | 17.30290036 |
| LOC100133091 | NR_029411    | 91.75672686 | 4.608971157 | 2.33E-07    | 19.90828837 |
| NARS2        | NM_001243251 | 58.5320095  | 0.765703977 | 3.67E-06    | 76.44208626 |
| ANKRD36B     | NM_025190    | 55.86039251 | 1.305962309 | 3.58E-05    | 42.77335733 |
| SRP14        | NM_003134    | 97.09996085 | 13.75289424 | 1.42E-05    | 7.060329205 |
| ISY1         | NM_001199469 | 65.62384623 | 6.3816555   | 4.17E-05    | 10.283201   |
| PSMF1        | NM_006814    | 93.99119317 | 5.086174717 | 1.02E-07    | 18.47974134 |
| ADCK3        | NM_020247    | 51.87732345 | 7.414139222 | 0.002980676 | 6.997079755 |
| BRAF         | NM_004333    | 179.5303847 | 1.237563972 | 4.35E-17    | 145.0675591 |
| PPP2CA       | NM_002715    | 69.60691528 | 8.278114569 | 0.000101964 | 8.408546983 |
| TYK2         | NM_003331    | 97.53711154 | 8.288510948 | 2.95E-07    | 11.76774841 |
| ACYP2        | NM_138448    | 75.38729997 | 2.142331697 | 1.41E-06    | 35.1893687  |
| SUMO2        | NM_006937    | 95.78850885 | 16.88527273 | 4.43E-05    | 5.672902674 |
| HCFC2        | NM_013320    | 76.69875203 | 3.967819228 | 3.09E-06    | 19.33020322 |
| NUTF2        | NM_005796    | 101.5201806 | 13.37652852 | 1.84E-06    | 7.589426541 |
| TTN-AS1      | NR_038271    | 42.59973328 | 0.677818471 | 9.47E-05    | 62.84829214 |
| PDX1         | NM_000209    | 45.22263741 | 5.029610995 | 0.003415275 | 8.991279337 |
| EXOSC8       | NM_181503    | 60.76647581 | 3.360327328 | 2.51E-05    | 18.08349898 |
| TUBE1        | NM_016262    | 58.09485881 | 4.362234872 | 0.000142681 | 13.31768245 |
| TUBA1C       | NM_032704    | 228.2989404 | 25.83095556 | 9.09E-14    | 8.838191833 |
| DBIL5P       | NR_024120    | 84.22773945 | 7.72380923  | 8.58E-06    | 10.90494819 |
| PROSER2      | NM_153256    | 76.26160134 | 3.926341276 | 3.40E-06    | 19.42306997 |
| TBL1XR1      | NM_024665    | 74.02713503 | 2.198239171 | 1.39E-06    | 33.67565095 |
| SLFN5        | NM_144975    | 108.6120173 | 2.658147391 | 5.28E-11    | 40.86004324 |
| ZNF862       | NM_001099220 | 82.91628738 | 9.07841796  | 5.86E-06    | 9.133341046 |
| DLG5         | NM_004747    | 83.35343807 | 7.819207655 | 8.73E-06    | 10.66008754 |
| CDC42EP2     | NM_006779    | 93.99119317 | 22.01695635 | 0.000338701 | 4.269036631 |
| PTGER4       | NM_000958    | 54.98609113 | 1.008409647 | 5.67E-06    | 54.52753382 |
| LOC400684    | NR_046201    | 144.9455024 | 1.731623928 | 2.95E-16    | 83.70495464 |
| ISL1         | NM_002202    | 48.33140508 | 3.77771147  | 0.000673985 | 12.79383179 |
| MTX2         | NM_006554    | 116.1410048 | 4.004093025 | 8.03E-10    | 29.00557106 |
| TNFRSF21     | NM_014452    | 97.09996085 | 1.812246598 | 4.06E-09    | 53.57988308 |
| MAP2K2       | NM_030662    | 123.6699922 | 16.79251397 | 1.97E-07    | 7.364590702 |
| MTX3         | NM_001010891 | 72.71568297 | 2.787225156 | 2.19E-06    | 26.088916   |
| PSMC1        | NM_002802    | 43.47403467 | 5.627889113 | 0.003553981 | 7.724749688 |
| FAM188A      | NM_024948    | 77.57305339 | 2.296438923 | 5.27E-07    | 33.77971546 |
| AP1M1        | NM_001130524 | 68.29546324 | 12.53950036 | 0.001152131 | 5.446426194 |
| VPS37C       | NM_017966    | 62.07792787 | 9.839151497 | 0.001062344 | 6.309276556 |
| ST3GAL6-AS1  | NR_046683    | 66.98401118 | 3.358212102 | 1.65E-05    | 19.9463313  |
| NEURL4       | NM_032442    | 137.4165149 | 21.53481819 | 2.66E-07    | 6.381131881 |
| FAM32A       | NM_014077    | 80.73053395 | 15.83126698 | 0.000522405 | 5.099436075 |
| KDSR         | NM_002035    | 91.31957618 | 3.622119536 | 1.14E-07    | 25.21164067 |
| CCDC136      | NM_001201372 | 87.33650713 | 7.177564024 | 1.61E-06    | 12.16798719 |
| TONSL        | NM_013432    | 208.772033  | 45.320922   | 6.46E-09    | 4.606526605 |
| FLJ37035     | NR_033847    | 52.80033771 | 6.646153825 | 0.002092154 | 7.944495282 |
| VTIIA        | NM_145206    | 130.8105418 | 3.869354245 | 1.23E-11    | 33.80681466 |
| TESK1        | NM_006285    | 80.68182108 | 17.26044916 | 0.000996127 | 4.674375524 |
| INPP1        | NM_002194    | 39.49096561 | 2.879774499 | 0.001539619 | 13.71321457 |
| PYCRL        | NM_023078    | 126.7787599 | 28.91533687 | 1.77E-05    | 4.384481511 |

|            |              |             |             |             |             |
|------------|--------------|-------------|-------------|-------------|-------------|
| SBF2-AS1   | NR_036485    | 103.754647  | 7.507122171 | 1.24E-07    | 13.82082836 |
| MRPL45P2   | NR_033934    | 44.78548671 | 5.588331666 | 0.002563948 | 8.014106783 |
| KCTD10     | NM_031954    | 97.97426223 | 8.779875625 | 2.97E-07    | 11.15895787 |
| TGFB1      | NM_000660    | 83.79058876 | 11.584027   | 2.30E-05    | 7.233286731 |
| DNAJC30    | NM_032317    | 118.8126218 | 10.66664013 | 3.17E-08    | 11.13871101 |
| NXNL1      | NM_138454    | 56.73469387 | 5.590665273 | 0.000226721 | 10.14811138 |
| GRIPAP1    | NM_020137    | 49.20570646 | 6.070522755 | 0.001354359 | 8.105678612 |
| C1orf213   | NR_033690    | 124.5930065 | 27.41631381 | 2.62E-05    | 4.544484256 |
| MAN1A2     | NM_006699    | 83.35343807 | 1.671240954 | 1.81E-07    | 49.87517682 |
| ZNF787     | NM_001002836 | 101.9573313 | 13.40044683 | 2.19E-06    | 7.608502357 |
| KLHDC2     | NM_014315    | 168.4554789 | 8.299681838 | 6.70E-14    | 20.29661886 |
| USP47      | NM_001282659 | 132.5591446 | 4.800720676 | 7.18E-11    | 27.61234271 |
| MBTPS1     | NM_003791    | 92.24259043 | 6.313634898 | 2.44E-07    | 14.61006091 |
| LOXL4      | NM_032211    | 71.40423091 | 8.828620157 | 5.01E-05    | 8.08781323  |
| C9orf156   | NM_016481    | 93.99119317 | 6.349740132 | 2.45E-07    | 14.80236848 |
| NCOA2      | NM_006540    | 120.1240738 | 2.321745685 | 1.01E-10    | 51.73868721 |
| KANK2      | NM_001136191 | 80.68182108 | 11.18311606 | 4.56E-05    | 7.214610008 |
| C15orf39   | NM_015492    | 229.1732418 | 16.36622382 | 1.35E-16    | 14.00281729 |
| CA13       | NM_198584    | 92.67974111 | 2.263421139 | 7.69E-09    | 40.94675071 |
| ZNF18      | NM_144680    | 154.2718054 | 0.751935218 | 2.68E-20    | 205.1663517 |
| CHUK       | NM_001278    | 117.064019  | 7.54458267  | 5.47E-09    | 15.51630145 |
| ESD        | NM_001984    | 58.96916018 | 2.455901273 | 1.15E-05    | 24.01120959 |
| PLIN5      | NM_001013706 | 47.01995303 | 5.775243979 | 0.001776749 | 8.141639244 |
| PMM2       | NM_000303    | 86.46220574 | 5.435174962 | 6.82E-07    | 15.90789742 |
| TICRR      | NM_152259    | 107.737716  | 5.773587561 | 5.49E-09    | 18.6604455  |
| ACTR3C     | NM_001164458 | 51.00302207 | 1.489948655 | 0.000133399 | 34.23139575 |
| ZC3HC1     | NM_016478    | 97.53711154 | 4.287950545 | 3.11E-08    | 22.74679022 |
| FAM103A1   | NM_031452    | 62.51507855 | 7.070729457 | 0.000232789 | 8.841390261 |
| WDR77      | NM_024102    | 98.41141291 | 4.739535062 | 1.87E-08    | 20.76393816 |
| SLC48A1    | NM_017842    | 122.7956908 | 17.98968775 | 7.09E-07    | 6.825893397 |
| RIN3       | NM_024832    | 64.31239418 | 6.887692679 | 5.90E-05    | 9.337291481 |
| ASB1       | NM_001040445 | 93.55404248 | 9.270419326 | 2.18E-06    | 10.09167322 |
| NT5DC3     | NM_001031701 | 134.3077472 | 5.659216867 | 2.92E-11    | 23.73256767 |
| SLC6A17    | NM_001010898 | 93.99119317 | 7.769635235 | 7.07E-07    | 12.09724657 |
| ADPRHL1    | NM_199162    | 80.68182108 | 11.14910407 | 4.23E-05    | 7.236619246 |
| TRIM28     | NM_005762    | 226.5016248 | 40.10363427 | 1.50E-10    | 5.647907701 |
| TTLL2      | NM_031949    | 26.1815935  | 0.25552554  | 0.001159156 | 102.4617482 |
| SMG5       | NM_015327    | 179.5303847 | 9.484489117 | 6.54E-14    | 18.92884081 |
| EIF2S2     | NM_003908    | 121.4842387 | 10.45922886 | 6.66E-09    | 11.61502825 |
| ECH1       | NM_001398    | 60.76647581 | 9.5294845   | 0.001478729 | 6.376680271 |
| GALNS      | NM_000512    | 151.1630377 | 22.55258752 | 1.56E-08    | 6.702691547 |
| CRABP1     | NM_004378    | 48.76855577 | 3.460194936 | 0.000413343 | 14.09416425 |
| NDUFA6-AS1 | NR_034118    | 83.79058876 | 5.745132783 | 1.00E-06    | 14.58462179 |
| ZBTB40     | NM_014870    | 83.35343807 | 3.914948852 | 1.97E-07    | 21.29106694 |
| ERCC6      | NM_000124    | 66.06099693 | 2.029865819 | 6.50E-06    | 32.54451418 |
| IDH3A      | NM_005530    | 78.05891695 | 4.558920182 | 1.87E-06    | 17.12223813 |
| TDRD7      | NM_014290    | 59.84346156 | 2.762116638 | 2.64E-05    | 21.66579816 |
| UBE2D4     | NM_015983    | 143.1968996 | 7.936758235 | 1.63E-11    | 18.04224034 |
| FEZ2       | NM_005102    | 70.04406598 | 2.660798171 | 1.38E-06    | 26.3244566  |
| CAPNS1     | NM_001749    | 100.6458792 | 15.88312154 | 1.83E-05    | 6.336656114 |
| AGPAT6     | NM_178819    | 135.6679122 | 6.752874862 | 1.54E-10    | 20.09039335 |
| BUB1B      | NM_001211    | 75.38729997 | 1.815053585 | 6.47E-07    | 41.53447623 |
| SMU1       | NM_018225    | 46.58280234 | 6.428803048 | 0.002538479 | 7.245952628 |
| AQR        | NM_014691    | 56.78340675 | 1.009810323 | 3.84E-06    | 56.23175506 |
| DECR2      | NM_020664    | 66.93529829 | 5.528780911 | 6.84E-05    | 12.10670116 |
| SMAD4      | NM_005359    | 123.2328415 | 3.20270352  | 1.41E-11    | 38.47775503 |
| TATDN2     | NM_014760    | 166.7068761 | 7.403042204 | 1.23E-13    | 22.5186986  |
| POLR2J     | NM_006234    | 103.754647  | 11.064667   | 8.08E-07    | 9.377114285 |
| GNS        | NM_002076    | 58.5320095  | 2.849812801 | 3.92E-05    | 20.53889627 |
| TMTC2      | NM_152588    | 30.60181325 | 0.385780366 | 0.002018581 | 79.32444463 |
| LMAN2      | NM_006816    | 146.742818  | 12.23158038 | 2.64E-10    | 11.99704481 |
| ACOT8      | NM_005469    | 105.5032497 | 7.772497655 | 2.07E-08    | 13.57391849 |

|           |              |             |             |             |             |
|-----------|--------------|-------------|-------------|-------------|-------------|
| FBF1      | NM_001080542 | 270.4128101 | 17.21388425 | 1.08E-19    | 15.70899434 |
| USP24     | NM_015306    | 114.8295527 | 1.663721143 | 1.61E-10    | 69.01971114 |
| GRID1     | NM_017551    | 37.2564993  | 1.270884832 | 0.000626277 | 29.31540165 |
| MAGOH     | NM_002370    | 42.16258261 | 5.495819997 | 0.003082994 | 7.671754648 |
| RPAP1     | NM_015540    | 108.1748666 | 8.069839475 | 2.37E-08    | 13.404835   |
| CLIP2     | NM_003388    | 62.51507855 | 10.65949434 | 0.001260617 | 5.864732096 |
| PDSS1     | NM_014317    | 118.8126218 | 4.138292981 | 2.99E-10    | 28.71053894 |
| TSKU      | NM_015516    | 90.8824255  | 19.17780203 | 0.000128293 | 4.738938557 |
| YRDC      | NM_024640    | 120.1240738 | 16.54092256 | 3.75E-07    | 7.262235425 |
| KLF3-AS1  | NR_026804    | 44.78548671 | 3.945451348 | 0.000575924 | 11.35116943 |
| STXBP3    | NM_007269    | 111.7207851 | 3.537587983 | 2.69E-10    | 31.5810619  |
| PATL1     | NM_152716    | 148.9285714 | 1.28978655  | 1.28E-16    | 115.4676109 |
| RBM15B    | NM_013286    | 94.86549455 | 21.08161565 | 0.000295298 | 4.499915762 |
| TRIM4     | NM_033017    | 48.81726865 | 7.096906043 | 0.004620668 | 6.878669149 |
| FAHD2B    | NM_199336    | 61.2036265  | 8.36949243  | 0.00036108  | 7.312704684 |
| EIF5A2    | NM_020390    | 37.69364998 | 2.68564166  | 0.002495009 | 14.03524921 |
| HSPA13    | NM_006948    | 66.49814761 | 3.217694155 | 8.72E-06    | 20.66639786 |
| CDCA2     | NM_152562    | 82.91628738 | 3.733058398 | 9.47E-07    | 22.21135555 |
| RADIL     | NM_018059    | 62.95222924 | 6.436623435 | 9.55E-05    | 9.780318807 |
| TANC1     | NM_033394    | 168.0183282 | 4.367059287 | 5.99E-14    | 38.47402042 |
| TTC12     | NM_017868    | 95.30264523 | 2.213096906 | 5.91E-09    | 43.06302402 |
| MKI67     | NM_001145966 | 82.91628738 | 7.397453481 | 5.26E-06    | 11.20876091 |
| PI4K2B    | NM_018323    | 87.33650713 | 2.853755099 | 2.68E-08    | 30.6040652  |
| C1GALT1   | NM_020156    | 148.4914208 | 3.580822128 | 6.69E-13    | 41.46852748 |
| RAMP1     | NM_005855    | 62.51507855 | 8.267027511 | 0.000360997 | 7.561977805 |
| PKNOX1    | NM_004571    | 66.49814761 | 7.714223451 | 0.000210351 | 8.620199821 |
| NLN       | NM_020726    | 73.15283366 | 3.403983766 | 1.36E-06    | 21.49035914 |
| TIPIN     | NM_001289986 | 97.09996085 | 3.441418601 | 9.19E-09    | 28.21509735 |
| PBK       | NM_001278945 | 39.9281163  | 3.395546446 | 0.001640618 | 11.75896632 |
| CEP135    | NM_025009    | 43.91118534 | 1.845742134 | 0.001004533 | 23.79053094 |
| FAM227B   | NM_152647    | 23.07282583 | 0.017266665 | 0.003750055 | 1336.264139 |
| RLF       | NM_012421    | 54.11178977 | 2.648290746 | 8.97E-05    | 20.43272245 |
| POLR2A    | NM_000937    | 217.6611853 | 11.99338814 | 1.70E-16    | 18.14843169 |
| STARD5    | NM_181900    | 54.98609113 | 5.421537457 | 0.000239699 | 10.1421583  |
| FAR1      | NM_032228    | 54.11178977 | 1.415660095 | 6.08E-05    | 38.22371626 |
| FGF9      | NM_002010    | 41.67671904 | 3.413605055 | 0.00091482  | 12.20900437 |
| PPP2CB    | NM_001009552 | 111.7207851 | 2.270568453 | 2.07E-11    | 49.20388324 |
| PLCD3     | NM_133373    | 113.0322371 | 18.47312981 | 2.48E-06    | 6.118737769 |
| OBFC1     | NM_024928    | 96.22565948 | 7.225323983 | 3.31E-07    | 13.31783318 |
| ATP5B     | NM_001686    | 192.4026061 | 11.96773428 | 1.16E-14    | 16.07677791 |
| SMNDC1    | NM_005871    | 57.65770813 | 7.810086819 | 0.000649238 | 7.382466989 |
| CYB5B     | NM_030579    | 99.7715779  | 5.986513577 | 2.97E-08    | 16.66605723 |
| FERMT1    | NM_017671    | 102.394482  | 2.088351847 | 6.10E-10    | 49.03124065 |
| LOC344967 | NR_027277    | 125.9044585 | 4.100158893 | 3.64E-12    | 30.70721447 |
| OGFOD1    | NM_018233    | 78.93321834 | 4.074390907 | 1.09E-06    | 19.37301063 |
| ZMYM4     | NM_005095    | 105.9404003 | 2.488568739 | 1.53E-09    | 42.57081538 |
| GRHL2     | NM_024915    | 47.01995303 | 4.250146729 | 0.002879962 | 11.06313641 |
| BEND6     | NM_152731    | 80.2446704  | 4.687600965 | 2.48E-06    | 17.1184943  |
| MTERF4    | NM_182501    | 122.3585401 | 6.554898417 | 1.09E-10    | 18.66673323 |
| DDI2      | NM_032341    | 60.76647581 | 5.112654393 | 0.000138931 | 11.88550431 |
| TVP23C    | NM_145301    | 73.15283366 | 2.783501165 | 9.31E-07    | 26.2808705  |
| ATP1B1    | NM_001677    | 147.6171194 | 5.964586877 | 1.94E-12    | 24.74892603 |
| FAM8A1    | NM_016255    | 53.18877551 | 7.333745118 | 0.001105353 | 7.252607591 |
| DDX59     | NM_001031725 | 99.7715779  | 2.539517019 | 4.90E-10    | 39.28761932 |
| POR       | NM_000941    | 178.6560833 | 9.395071631 | 1.81E-13    | 19.01593626 |
| HSPA9     | NM_004134    | 67.42116185 | 11.31548982 | 0.000340132 | 5.95830697  |
| SNX4      | NR_073435    | 114.8295527 | 2.347298944 | 1.00E-10    | 48.91986724 |
| WDR75     | NM_032168    | 68.73261391 | 1.042102405 | 5.46E-07    | 65.95571952 |
| HEBP2     | NM_014320    | 79.8075197  | 3.359994    | 1.23E-07    | 23.75228042 |
| SETD5     | NM_001292043 | 134.3077472 | 4.906874395 | 2.95E-11    | 27.37134404 |
| RBM15     | NM_001201545 | 83.35343807 | 16.0471802  | 0.000340285 | 5.1942732   |
| CWC22     | NM_020943    | 58.09485881 | 2.20031601  | 4.01E-05    | 26.40296145 |

|             |              |             |             |             |             |
|-------------|--------------|-------------|-------------|-------------|-------------|
| CREG1       | NM_003851    | 94.91420746 | 3.551183568 | 6.82E-09    | 26.72748554 |
| ANKS1A      | NM_015245    | 102.394482  | 5.988636158 | 3.33E-08    | 17.0981304  |
| C19orf26    | NM_152769    | 85.10204081 | 18.84101885 | 0.000595772 | 4.516849194 |
| HIATL1      | NM_032558    | 74.02713503 | 3.91624196  | 1.33E-06    | 18.90259483 |
| RANBP10     | NM_020850    | 97.09996085 | 6.604629232 | 8.60E-08    | 14.70180345 |
| RPL30       | NM_000989    | 131.6848432 | 18.85317254 | 1.79E-07    | 6.98475776  |
| MRPS24      | NM_032014    | 68.73261391 | 15.43884408 | 0.001954183 | 4.451927459 |
| DNAH3       | NM_017539    | 41.23956835 | 3.583508216 | 0.002224252 | 11.5081551  |
| EPCAM       | NM_002354    | 68.29546324 | 5.761838902 | 1.41E-05    | 11.85306712 |
| GATAD2B     | NM_020699    | 98.41141291 | 4.916673666 | 8.77E-08    | 20.0158521  |
| RHPN1       | NM_052924    | 146.742818  | 34.16570259 | 4.14E-06    | 4.295032939 |
| ATG2B       | NM_018036    | 37.2564993  | 1.619019371 | 0.003314175 | 23.01176871 |
| CCND1       | NM_053056    | 140.0881319 | 22.21231129 | 1.59E-07    | 6.30677871  |
| EIF4EBP2    | NM_004096    | 76.26160134 | 8.4496533   | 1.65E-05    | 9.025411888 |
| TPTE2P1     | NR_026730    | 37.2564993  | 0.563824944 | 0.000185393 | 66.07813242 |
| LINC00466   | NR_038252    | 64.31239418 | 1.871978268 | 8.20E-06    | 34.35531025 |
| C7orf43     | NM_018275    | 134.3077472 | 29.41576304 | 5.90E-06    | 4.56584271  |
| LIPT2       | NM_001144869 | 161.8007928 | 1.254099489 | 3.37E-17    | 129.0175096 |
| LINC00637   | NR_038436    | 81.11897176 | 9.972124561 | 2.03E-05    | 8.134572654 |
| NAA15       | NM_057175    | 68.29546324 | 4.23888395  | 2.77E-05    | 16.11166148 |
| LOC642852   | NR_026943    | 76.26160134 | 17.96232865 | 0.001178619 | 4.245641132 |
| FAM58A      | NM_001130997 | 66.93529829 | 5.895808447 | 7.89E-05    | 11.35303138 |
| CDK7        | NM_001799    | 46.14565165 | 3.351270885 | 0.000523994 | 13.76959764 |
| CATSPER2P1  | NR_002318    | 129.0132262 | 4.14627941  | 3.85E-12    | 31.11542021 |
| MCM6        | NM_005915    | 75.82445064 | 5.466737281 | 3.50E-06    | 13.87014717 |
| STARD9      | NM_020759    | 70.04406598 | 5.047064081 | 1.76E-05    | 13.87818043 |
| ZFAND3      | NM_021943    | 86.89935644 | 3.100884992 | 1.56E-07    | 28.02405012 |
| ZNF710      | NM_198526    | 59.84346156 | 9.357392078 | 0.000663869 | 6.395314107 |
| NUS1        | NM_138459    | 55.42324183 | 4.122787774 | 0.000392683 | 13.44314694 |
| LINC00657   | NR_027451    | 264.1952748 | 14.36763069 | 8.95E-21    | 18.38822841 |
| SREK1IP1    | NM_173829    | 62.51507855 | 0.165936577 | 7.78E-09    | 376.7407993 |
| JMJD7       | NM_001114632 | 106.8634146 | 10.76934344 | 2.94E-07    | 9.922927545 |
| KCNK6       | NM_004823    | 58.09485881 | 11.03489315 | 0.002081801 | 5.26465078  |
| IMPA2       | NM_014214    | 101.5201806 | 7.364470466 | 1.18E-07    | 13.78512971 |
| PLEKHM3     | NM_001080475 | 119.6869232 | 2.620411645 | 8.82E-11    | 45.67485547 |
| WDR3        | NM_006784    | 25.74444283 | 0.341452462 | 0.002668268 | 75.39685808 |
| THUMPD3-AS1 | NR_027007    | 179.5303847 | 13.29170612 | 4.05E-13    | 13.5069481  |
| C1orf220    | NR_033186    | 41.67671904 | 1.2649694   | 6.06E-05    | 32.94681994 |
| TMEM104     | NM_017728    | 70.52992954 | 14.96880495 | 0.000769917 | 4.711794279 |
| TPST1       | NM_003596    | 120.6099374 | 2.014441785 | 5.79E-11    | 59.87263485 |
| TMEM55A     | NM_018710    | 79.8075197  | 0.211119615 | 4.03E-11    | 378.0203927 |
| RNF114      | NM_018683    | 166.2210125 | 5.682886712 | 8.34E-15    | 29.24939753 |
| MIS18BP1    | NM_018353    | 62.07792787 | 3.092191708 | 1.17E-05    | 20.07570479 |
| PIK3CA      | NM_006218    | 59.40631088 | 0.43969655  | 5.88E-07    | 135.1075211 |
| GTPBP2      | NM_019096    | 94.86549455 | 17.77229001 | 5.16E-05    | 5.337831788 |
| FAM118A     | NM_001104595 | 71.8413816  | 11.34157185 | 0.000228767 | 6.334340823 |
| BTC         | NM_001729    | 51.44017277 | 3.659575257 | 0.000159402 | 14.05632325 |
| CCDC157     | NM_001017437 | 181.764851  | 15.78908039 | 3.77E-12    | 11.51206065 |
| ELL         | NM_006532    | 96.66281017 | 12.40398413 | 2.23E-06    | 7.792884054 |
| ALDH9A1     | NM_000696    | 83.35343807 | 2.880038208 | 8.04E-08    | 28.94178203 |
| ATF6        | NM_007348    | 36.38219793 | 2.531618928 | 0.003887188 | 14.37111941 |
| MED16       | NM_005481    | 98.41141291 | 24.36387711 | 0.000371583 | 4.039234498 |
| ATXN1L      | NM_001137675 | 42.16258261 | 5.961675402 | 0.00314887  | 7.072270757 |
| DEGS1       | NM_003676    | 105.066099  | 7.025049553 | 3.62E-08    | 14.95592283 |
| SRSF9       | NM_003769    | 100.2087285 | 14.85274636 | 4.32E-06    | 6.746814771 |
| C1orf186    | NM_001007544 | 41.67671904 | 3.758332462 | 0.001046325 | 11.08915176 |
| RAB11B      | NM_004218    | 76.69875203 | 15.75417668 | 0.000547855 | 4.868470984 |
| GTF2H2      | NM_001515    | 93.55404248 | 3.217735749 | 5.13E-09    | 29.07449516 |
| CCDC171     | NM_173550    | 60.76647581 | 0.272630249 | 1.92E-06    | 222.8897053 |
| FNBP1       | NM_015033    | 94.42834386 | 4.198041588 | 1.63E-07    | 22.49342744 |
| BLK         | NM_001715    | 37.2564993  | 2.109989401 | 0.003392644 | 17.65719736 |
| ENTPD1-AS1  | NR_038444    | 48.33140508 | 2.180712989 | 0.00037348  | 22.16312065 |

|                |              |             |             |             |             |
|----------------|--------------|-------------|-------------|-------------|-------------|
| POLR2J3        | NM_001097615 | 122.3585401 | 6.742216504 | 1.21E-09    | 18.14811791 |
| EMC8           | NM_006067    | 137.4652279 | 12.73373649 | 1.69E-09    | 10.79535673 |
| GCSH           | NR_033249    | 82.4791367  | 6.091461368 | 2.25E-06    | 13.54012309 |
| FSCN1          | NM_003088    | 212.3666642 | 29.22956041 | 1.27E-11    | 7.265475815 |
| FLOT2          | NM_004475    | 97.09996085 | 13.7548824  | 4.73E-06    | 7.059308691 |
| CCDC97         | NM_052848    | 146.742818  | 16.52861187 | 3.98E-09    | 8.878109015 |
| HNRNPUL1       | NM_144732    | 59.84346156 | 11.38288855 | 0.001932656 | 5.257317707 |
| PDCD7          | NM_005707    | 139.6509813 | 4.220589169 | 1.70E-13    | 33.08803006 |
| LOC646626      | NR_045484    | 129.0132262 | 6.859907481 | 9.76E-10    | 18.80684638 |
| FAM122A        | NM_138333    | 94.86549455 | 1.367257247 | 1.86E-10    | 69.38379354 |
| PDS5A          | NM_001100399 | 123.2328415 | 4.523977407 | 4.74E-10    | 27.239933   |
| PCIF1          | NM_022104    | 225.6273234 | 15.49970673 | 1.31E-16    | 14.55687694 |
| PDP2           | NM_020786    | 62.07792787 | 3.911355883 | 1.94E-05    | 15.87120419 |
| C7orf25        | NM_024054    | 81.60483533 | 8.348593392 | 8.58E-06    | 9.774680775 |
| CIT            | NM_007174    | 54.11178977 | 3.075453604 | 0.000109782 | 17.59473455 |
| KIAA0922       | NM_015196    | 98.41141291 | 5.437831266 | 1.01E-07    | 18.0975481  |
| EMC10          | NM_206538    | 154.757669  | 24.45739262 | 3.96E-08    | 6.327643809 |
| MSH3           | NM_002439    | 100.2087285 | 3.600063073 | 7.26E-09    | 27.83527025 |
| A4GALT         | NM_017436    | 62.95222924 | 11.30178631 | 0.001075359 | 5.570113211 |
| DAK            | NM_015533    | 158.6920252 | 17.5864187  | 2.82E-10    | 9.023555499 |
| TMEM189-UBE2V1 | NM_199203    | 140.5252827 | 12.66260307 | 2.59E-09    | 11.09766151 |
| NUP205         | NM_015135    | 65.18669554 | 1.997470994 | 6.70E-06    | 32.63461434 |
| IBA57          | NM_001010867 | 175.1101649 | 12.7217416  | 2.11E-12    | 13.76463777 |
| COMMD2         | NM_016094    | 100.2087285 | 3.930506122 | 2.60E-09    | 25.49512084 |
| C3orf67        | NM_198463    | 118.375471  | 0.129403433 | 6.57E-14    | 914.7784464 |
| ALKBH8         | NM_001301010 | 39.9281163  | 0.936478753 | 0.000182942 | 42.63643589 |
| CASC3          | NM_007359    | 45.22263741 | 5.215856725 | 0.002388303 | 8.670222322 |
| ZFYVE20        | NM_022340    | 54.98609113 | 5.730483481 | 0.000412752 | 9.595366833 |
| PRR14L         | NM_173566    | 143.6340504 | 5.105869316 | 4.09E-12    | 28.13116464 |
| VAC14          | NM_018052    | 61.64077717 | 9.689916789 | 0.000401898 | 6.361331941 |
| ATP6V1G1       | NM_004888    | 72.71568297 | 7.124256204 | 2.61E-05    | 10.2067754  |
| HILPDA         | NM_001098786 | 63.87524348 | 12.64680764 | 0.004121111 | 5.050700959 |
| LOC728613      | NR_003713    | 91.31957618 | 7.719835858 | 1.04E-06    | 11.82921216 |
| HTATSF1        | NM_014500    | 59.40631088 | 0.928931034 | 8.25E-07    | 63.95126084 |
| LOC100131655   | NR_040024    | 134.3077472 | 5.145323022 | 5.82E-12    | 26.10287958 |
| TTC30B         | NM_152517    | 38.13080067 | 2.684850486 | 0.001559542 | 14.20220637 |
| ZDHHC6         | NM_022494    | 184.8736186 | 0.076182585 | 2.30E-32    | 2426.717589 |
| SLC35E2B       | NM_001290264 | 128.1389248 | 12.67404987 | 1.43E-08    | 10.11033774 |
| ZNF593         | NM_015871    | 94.86549455 | 9.88374981  | 9.58E-05    | 9.598127874 |
| UBE2Q2         | NM_001145335 | 49.69157001 | 2.521588172 | 0.000279547 | 19.70645745 |
| TOP2B          | NM_001068    | 45.65978809 | 1.096666838 | 4.92E-05    | 41.63505864 |
| ZPR1           | NM_003904    | 119.6869232 | 7.442062227 | 1.09E-09    | 16.08249428 |
| ARHGAP5-AS1    | NR_027263    | 40.80241766 | 2.411468498 | 0.002301394 | 16.92015371 |
| FAM21EP        | NR_038275    | 43.91118534 | 2.10604678  | 0.000870212 | 20.85005222 |
| SAP30L-AS1     | NR_037897    | 104.1917976 | 4.508521038 | 1.62E-08    | 23.10997259 |
| ZDHHC23        | NM_173570    | 95.30264523 | 4.634824038 | 1.88E-08    | 20.56230063 |
| CHRNA5         | NM_000745    | 132.5591446 | 2.71396142  | 2.70E-13    | 48.84341524 |
| KPNA6          | NM_012316    | 84.66489013 | 5.525438713 | 7.90E-07    | 15.32274531 |
| LOC100131347   | NR_036551    | 57.65770813 | 7.929221448 | 0.000893546 | 7.271547214 |
| ZNF487         | NR_026693    | 59.40631088 | 3.653924996 | 2.30E-05    | 16.25821848 |
| CPNE3          | NM_003909    | 80.2446704  | 4.868088009 | 2.05E-06    | 16.48381669 |
| TRIM62         | NM_018207    | 59.84346156 | 11.98930463 | 0.001894717 | 4.991403872 |
| LOC285074      | NR_026846    | 57.65770813 | 3.41461315  | 4.27E-05    | 16.8855755  |
| SLC30A4        | NM_013309    | 42.59973328 | 1.397623209 | 0.000665415 | 30.48012727 |
| OIP5-AS1       | NR_026757    | 165.3467113 | 6.760891013 | 6.95E-14    | 24.45634916 |
| TMX4           | NM_021156    | 115.7038541 | 2.063985849 | 2.03E-11    | 56.05845319 |
| BRIP1          | NM_032043    | 129.9362404 | 4.340902631 | 1.57E-10    | 29.93300045 |
| ING3           | NM_019071    | 80.68182108 | 4.19740648  | 1.06E-06    | 19.22182697 |
| EFNB2          | NM_004093    | 66.49814761 | 2.682657674 | 5.21E-06    | 24.78815998 |
| ZNF696         | NM_030895    | 87.82237075 | 19.15785826 | 0.000382279 | 4.584143465 |
| URB2           | NM_014777    | 139.6509813 | 3.242708867 | 8.10E-13    | 43.0661484  |
| PGM2L1         | NM_173582    | 62.95222924 | 2.00735979  | 1.08E-05    | 31.3607105  |

|              |              |             |             |             |             |
|--------------|--------------|-------------|-------------|-------------|-------------|
| TTC21B       | NM_024753    | 90.8824255  | 0.436224598 | 6.63E-11    | 208.3386079 |
| HSDL1        | NM_031463    | 83.79058876 | 5.577190841 | 6.98E-07    | 15.02379803 |
| CLEC19A      | NM_001256720 | 45.22263741 | 6.539542219 | 0.002382459 | 6.91526041  |
| LINC01278    | NR_015353    | 37.69364998 | 0.490153349 | 0.000396704 | 76.90174939 |
| EGR1         | NM_001964    | 155.1461068 | 26.4498025  | 7.95E-08    | 5.865681106 |
| ATP13A1      | NM_020410    | 116.1410048 | 17.34494182 | 1.30E-06    | 6.695958163 |
| ANKRD32      | NM_032290    | 70.52992954 | 2.914108757 | 2.08E-06    | 24.20291603 |
| LRRC57       | NM_153260    | 100.2087285 | 3.501446735 | 8.80E-10    | 28.61923546 |
| PCNT         | NM_006031    | 109.049168  | 5.85920152  | 8.96E-09    | 18.61160905 |
| DHTKD1       | NM_018706    | 54.54894044 | 4.043907858 | 0.000449604 | 13.48916502 |
| EIF2B1       | NM_001414    | 79.37036901 | 11.97297914 | 9.42E-05    | 6.629124469 |
| MRPL47       | NM_177988    | 68.73261391 | 1.701335172 | 3.22E-07    | 40.39922001 |
| CCNE2        | NM_057749    | 104.2405105 | 8.697371984 | 2.01E-07    | 11.98528827 |
| TEX261       | NM_144582    | 60.76647581 | 13.20030769 | 0.003455411 | 4.603413589 |
| SNHG22       | NR_117096    | 52.75162482 | 5.970033365 | 0.00080607  | 8.836068677 |
| SLC5A6       | NR_028323    | 114.8295527 | 14.74247546 | 4.23E-07    | 7.789027905 |
| PNPT1        | NM_033109    | 68.29546324 | 0.965921668 | 1.10E-07    | 70.70497074 |
| PCNXL2       | NM_014801    | 95.78850885 | 3.109838183 | 1.41E-08    | 30.80176627 |
| TVP23B       | NM_016078    | 137.4165149 | 5.68237136  | 2.25E-11    | 24.18295219 |
| FAM83G       | NM_001039999 | 151.6001885 | 12.73796228 | 1.67E-10    | 11.90144743 |
| TMEM159      | NM_020422    | 84.66489013 | 3.448009934 | 1.81E-07    | 24.55471177 |
| CCNB1        | NM_031966    | 42.59973328 | 3.461542078 | 0.002304018 | 12.30657676 |
| LINC00271    | NR_026805    | 106.8634146 | 1.431584469 | 1.20E-09    | 74.64695024 |
| RTN4R        | NM_023004    | 81.55612244 | 15.2790815  | 0.000248665 | 5.337763426 |
| AKAP8        | NM_005858    | 176.8587677 | 13.10744421 | 6.89E-13    | 13.49300175 |
| GNPTAB       | NM_024312    | 89.57097344 | 2.693003582 | 4.64E-08    | 33.26062172 |
| FAF1         | NM_007051    | 76.26160134 | 2.207095257 | 9.49E-07    | 34.55292702 |
| XXYLT1       | NM_152531    | 78.49606764 | 7.266243457 | 2.73E-05    | 10.8028403  |
| MYCBP2       | NM_015057    | 109.049168  | 1.667269086 | 9.46E-10    | 65.40585975 |
| PDCD5        | NM_004708    | 97.09996085 | 8.452098199 | 5.46E-07    | 11.488267   |
| RSRP1        | NM_020317    | 122.7956908 | 18.93663547 | 8.15E-07    | 6.484556935 |
| KIF5B        | NM_004521    | 203.0403612 | 6.654288385 | 5.55E-17    | 30.51270842 |
| SOD1         | NM_000454    | 119.2497724 | 12.54508668 | 6.34E-08    | 9.505695373 |
| CGB          | NM_000737    | 45.65978809 | 1.043218024 | 0.000176913 | 43.76821244 |
| ETV5         | NM_004454    | 76.69875203 | 4.000111875 | 3.95E-06    | 19.17415173 |
| HNRNPA3      | NM_194247    | 124.1558557 | 19.02322278 | 9.27E-07    | 6.526541646 |
| ZFP91        | NM_053023    | 80.68182108 | 0.625847725 | 8.14E-10    | 128.9160571 |
| DHRX         | NM_145177    | 53.18877551 | 4.381247299 | 0.000564161 | 12.1400989  |
| DTD2         | NM_080664    | 65.18669554 | 2.775282824 | 6.23E-06    | 23.4883072  |
| RPL23A       | NM_000984    | 129.0132262 | 20.5189463  | 5.70E-07    | 6.287517121 |
| PRDX4        | NM_006406    | 58.5320095  | 3.586266938 | 0.000134576 | 16.32115247 |
| KCTD3        | NM_016121    | 82.04198601 | 0.336842927 | 1.10E-10    | 243.5615516 |
| ARF3         | NM_001659    | 122.3585401 | 7.911702531 | 7.53E-10    | 15.46551322 |
| UBAC2-AS1    | NR_036532    | 164.0352591 | 8.506822791 | 1.24E-13    | 19.28278785 |
| SLC8B1       | NM_024959    | 99.33442714 | 9.139030243 | 1.98E-07    | 10.86925248 |
| SLC35G1      | NM_153226    | 147.1799686 | 4.406539925 | 6.04E-14    | 33.40034838 |
| TCTN2        | NM_024809    | 39.9281163  | 3.701318375 | 0.001813289 | 10.78753899 |
| XKR8         | NM_018053    | 121.0470881 | 15.98319114 | 2.61E-07    | 7.573399265 |
| LOC100134868 | NR_004846    | 43.91118534 | 2.103558229 | 0.000349076 | 20.87471824 |
| DDA1         | NM_024050    | 83.79058876 | 18.69875871 | 0.000540083 | 4.481077598 |
| SNW1         | NM_012245    | 46.14565165 | 4.653480362 | 0.002492957 | 9.916373996 |
| C5orf42      | NM_023073    | 121.9213894 | 1.509804994 | 1.95E-11    | 80.75307073 |
| ZNF202       | NM_003455    | 87.77365781 | 2.526413537 | 3.67E-09    | 34.74239531 |
| NHLRC2       | NM_198514    | 71.8413816  | 5.785671228 | 1.47E-05    | 12.41712133 |
| USP53        | NM_019050    | 105.066099  | 2.419142954 | 8.73E-10    | 43.43112455 |
| SRRD         | NM_001013694 | 73.15283366 | 6.332149474 | 7.49E-06    | 11.55260689 |
| LRRC59       | NM_018509    | 131.6848432 | 13.7569115  | 1.72E-08    | 9.572267959 |
| ANKRD39      | NM_016466    | 110.4093329 | 10.14790318 | 8.46E-08    | 10.88001442 |
| MANF         | NM_006010    | 128.1389248 | 16.22588762 | 9.55E-08    | 7.897190451 |
| SPICE1       | NM_144718    | 63.87524348 | 0.668371718 | 3.81E-07    | 95.56844159 |
| TMEM62       | NM_024956    | 115.2667034 | 4.246077766 | 1.16E-09    | 27.14663031 |
| TMLHE        | NM_001184797 | 45.22263741 | 1.040521762 | 6.38E-05    | 43.46150083 |

|                |              |             |             |             |             |
|----------------|--------------|-------------|-------------|-------------|-------------|
| F3             | NM_001993    | 74.46428571 | 6.392092813 | 1.41E-05    | 11.6494375  |
| CAND1          | NM_018448    | 54.98609113 | 3.511100971 | 8.13E-05    | 15.6606408  |
| GALNT7         | NM_017423    | 56.73469387 | 3.890723964 | 6.02E-05    | 14.58204036 |
| ADCK5          | NM_174922    | 170.6899452 | 25.65746114 | 2.85E-09    | 6.652643622 |
| ZNF597         | NM_152457    | 39.9281163  | 2.310109058 | 0.000465818 | 17.28408283 |
| DCUN1D1        | NM_020640    | 180.4046861 | 1.979810077 | 2.78E-19    | 91.12221832 |
| TAF5           | NM_006951    | 111.2836343 | 8.835733737 | 5.14E-08    | 12.59472474 |
| HSP90B1        | NM_003299    | 64.31239418 | 5.333514919 | 2.49E-05    | 12.05816336 |
| GPCPD1         | NM_019593    | 63.38937993 | 1.08820934  | 6.35E-07    | 58.25108976 |
| SPPL2B         | NM_001077238 | 71.8413816  | 16.37547924 | 0.001759921 | 4.387131549 |
| LINC00839      | NR_026827    | 40.80241766 | 0.244475203 | 9.47E-06    | 166.8979805 |
| GTF3C4         | NM_012204    | 70.04406598 | 8.456831522 | 4.78E-05    | 8.282542438 |
| SHPK           | NM_013276    | 93.55404248 | 9.838715169 | 2.43E-06    | 9.508766224 |
| NABP2          | NM_024068    | 90.00812411 | 14.16048698 | 4.14E-05    | 6.356287341 |
| ASNA1          | NM_004317    | 64.74954487 | 8.719316487 | 0.000369532 | 7.425988604 |
| PIGB           | NM_004855    | 57.22055744 | 1.835415083 | 2.46E-05    | 31.17581302 |
| SH2D1B         | NM_053282    | 27.49304557 | 0.85565276  | 0.001491911 | 32.13107801 |
| DNTTIP2        | NM_014597    | 46.58280234 | 2.947530698 | 0.000908865 | 15.80400923 |
| MTG2           | NM_015666    | 143.6340504 | 10.92483615 | 3.77E-10    | 13.14747867 |
| SP4            | NM_003112    | 85.10204081 | 1.273320275 | 4.33E-08    | 66.83474886 |
| RNF10          | NM_014868    | 104.1917976 | 6.429309087 | 9.86E-08    | 16.2057534  |
| SCAF11         | NM_004719    | 114.392402  | 4.402723847 | 1.67E-09    | 25.98218874 |
| CCDC23         | NM_199342    | 124.1071429 | 8.209168481 | 9.07E-10    | 15.11811375 |
| UBQLN2         | NM_013444    | 55.86039251 | 5.437950209 | 0.000369419 | 10.27232512 |
| CSNK1G2        | NM_001319    | 102.394482  | 14.26810225 | 2.40E-06    | 7.176461181 |
| ZNF263         | NM_005741    | 74.51299858 | 11.08883069 | 0.000187056 | 6.719644361 |
| NCL            | NM_005381    | 153.8346547 | 14.74590743 | 2.42E-10    | 10.4323627  |
| ZNF252P-AS1    | NR_026974    | 113.9552513 | 17.11114546 | 3.44E-06    | 6.659709113 |
| GLYR1          | NM_032569    | 89.13382275 | 9.218466555 | 2.24E-06    | 9.669050945 |
| NUDCD3         | NM_015332    | 99.33442714 | 6.557054313 | 5.18E-08    | 15.14924574 |
| C15orf38-AP3S2 | NM_001199058 | 43.47403467 | 6.457209276 | 0.004855881 | 6.732635232 |
| TMEM63A        | NM_014698    | 86.46220574 | 14.31680874 | 5.62E-05    | 6.039209386 |
| RARS           | NM_002887    | 129.4503768 | 2.221175017 | 4.01E-13    | 58.28013362 |
| HIAT1          | NM_033055    | 97.97426223 | 4.221490275 | 4.30E-08    | 23.20845385 |
| CREBL2         | NM_001310    | 47.45710371 | 2.690318328 | 0.000227716 | 17.63995852 |
| SDF4           | NM_016176    | 119.2497724 | 13.10864424 | 3.89E-08    | 9.097033245 |
| SDHAP3         | NR_003263    | 77.13590271 | 4.436377141 | 1.96E-06    | 17.38713825 |
| RAD18          | NM_020165    | 83.35343807 | 3.495204744 | 1.94E-07    | 23.84794144 |
| PLD2           | NM_002663    | 109.049168  | 13.08990419 | 4.32E-07    | 8.330784275 |
| PDCD11         | NM_014976    | 121.4842387 | 12.0970249  | 5.55E-08    | 10.04248894 |
| KDELC1         | NM_024089    | 57.22055744 | 0.815282871 | 1.69E-06    | 70.18491309 |
| DESI1          | NM_015704    | 169.3297803 | 8.114978957 | 2.23E-13    | 20.86632402 |
| ZMIZ1          | NM_020338    | 91.75672686 | 9.963127415 | 7.32E-06    | 9.209630977 |
| MGAT2          | NM_002408    | 114.392402  | 12.18998115 | 2.58E-07    | 9.384132799 |
| GREB1L         | NM_001142966 | 50.5658714  | 2.136709056 | 0.000201334 | 23.66530494 |
| ASF1B          | NM_018154    | 145.8685166 | 17.2234454  | 5.21E-09    | 8.469183327 |
| POLR2B         | NM_000938    | 58.5320095  | 2.967744025 | 4.26E-05    | 19.72272845 |
| IARS2          | NM_018060    | 97.09996085 | 2.12026578  | 2.98E-09    | 45.79612697 |
| CDCA8          | NM_001256875 | 61.2036265  | 8.942123425 | 0.000469096 | 6.844417549 |
| C10orf10       | NM_007021    | 99.7715779  | 15.79977614 | 1.44E-05    | 6.314746299 |
| LRRC41         | NM_006369    | 108.6120173 | 18.89374282 | 7.74E-06    | 5.748570749 |
| PRSS22         | NM_022119    | 90.8824255  | 16.25728888 | 4.89E-05    | 5.590257155 |
| CIRH1A         | NM_032830    | 123.2328415 | 4.486247327 | 1.11E-10    | 27.46902533 |
| MYO9A          | NM_006901    | 87.33650713 | 2.56046609  | 8.01E-08    | 34.10961289 |
| BOK-AS1        | NR_033346    | 70.04406598 | 11.65626987 | 0.000514836 | 6.009132147 |
| SAT2           | NM_133491    | 113.0322371 | 24.71372934 | 0.000104738 | 4.573661689 |
| FANCM          | NM_020937    | 47.8942544  | 2.028113923 | 0.000270728 | 23.61516967 |
| NUP88          | NM_002532    | 92.24259043 | 3.162852408 | 1.06E-08    | 29.16436764 |
| MTFMT          | NM_139242    | 136.9793643 | 4.58159428  | 2.37E-12    | 29.89775085 |
| ARFGEF2        | NM_006420    | 211.44365   | 3.587985915 | 9.01E-20    | 58.93101451 |
| RAD21L1        | NM_001136566 | 85.10204081 | 3.538166047 | 2.70E-07    | 24.05258535 |
| QSER1          | NM_001076786 | 98.41141291 | 2.808479989 | 7.23E-09    | 35.04080972 |

|              |              |             |             |             |             |
|--------------|--------------|-------------|-------------|-------------|-------------|
| WBP4         | NM_007187    | 76.26160134 | 3.532015084 | 1.48E-06    | 21.59152765 |
| NDUFB7       | NM_004146    | 93.55404248 | 22.75854217 | 0.000287909 | 4.11072211  |
| GPSM2        | NM_013296    | 83.79058876 | 3.209840634 | 1.34E-07    | 26.10428315 |
| ITGB8        | NM_002214    | 27.93019625 | 0.882376272 | 0.003382502 | 31.65338546 |
| ZNF517       | NM_213605    | 126.3416091 | 18.48322256 | 4.65E-07    | 6.835475186 |
| FTSJ2        | NM_013393    | 129.8875276 | 17.9553698  | 1.70E-07    | 7.233909911 |
| CWF19L2      | NM_152434    | 41.67671904 | 0.774940568 | 0.000117136 | 53.78053592 |
| RAB33B       | NM_031296    | 66.06099693 | 4.218342665 | 2.49E-05    | 15.66041504 |
| MIOS         | NM_019005    | 107.3005653 | 1.47411524  | 4.04E-11    | 72.78980799 |
| FAM126A      | NM_032581    | 83.79058876 | 2.164051831 | 1.24E-07    | 38.71930771 |
| SCO1         | NM_004589    | 47.8942544  | 0.49897132  | 1.18E-05    | 95.9859866  |
| KIAA0195     | NM_014738    | 82.4791367  | 13.53526477 | 9.66E-05    | 6.093647824 |
| LIX1L        | NM_153713    | 58.5320095  | 3.039011035 | 2.68E-05    | 19.26021618 |
| ARID5A       | NM_212481    | 102.394482  | 14.11327819 | 4.72E-06    | 7.255187675 |
| ZNF852       | NM_001287349 | 119.2497724 | 9.112117464 | 3.09E-09    | 13.08694416 |
| LINC01232    | NR_110731    | 54.54894044 | 9.155524835 | 0.0037428   | 5.958035331 |
| LGALS1       | NM_014181    | 62.51507855 | 10.01557846 | 0.000533353 | 6.241784118 |
| NFKB1A       | NM_020529    | 155.5832575 | 21.6844085  | 2.58E-08    | 7.174890546 |
| ICMT         | NM_012405    | 158.6920252 | 15.26000971 | 2.02E-10    | 10.39920866 |
| MMP11        | NM_005940    | 109.049168  | 16.47887181 | 4.12E-06    | 6.617514189 |
| LTN1         | NM_015565    | 62.07792787 | 0.347398531 | 9.43E-08    | 178.693697  |
| C7orf26      | NM_024067    | 67.42116185 | 8.458389046 | 8.26E-05    | 7.970922298 |
| PIGL         | NM_004278    | 88.69667206 | 4.714244423 | 4.91E-07    | 18.81461038 |
| LOC100996654 | NR_110040    | 90.4452748  | 1.416003511 | 4.28E-09    | 63.87362328 |
| DDX1         | NM_004939    | 76.26160134 | 2.933897813 | 3.46E-07    | 25.99327113 |
| TAF1D        | NM_024116    | 86.89935644 | 17.09394401 | 0.000163958 | 5.083634087 |
| B3GNTL1      | NM_001009905 | 96.66281017 | 7.796602501 | 5.15E-07    | 12.39806828 |
| RNF11        | NM_014372    | 115.2667034 | 3.944862795 | 6.53E-10    | 29.21944548 |
| FASTKD1      | NR_104020    | 59.40631088 | 2.74035271  | 1.93E-05    | 21.67834478 |
| VPS37B       | NM_024667    | 103.754647  | 11.13753591 | 5.06E-07    | 9.315763178 |
| ALKBH1       | NM_006020    | 50.5658714  | 3.368292792 | 0.000136772 | 15.0123147  |
| KIAA1468     | NM_020854    | 86.02505507 | 3.326679089 | 1.19E-07    | 25.85913843 |
| LOC100505812 | NR_040599    | 49.69157001 | 4.775352085 | 0.001764385 | 10.40584425 |
| ZNF346       | NM_012279    | 132.1219938 | 6.124590264 | 3.53E-11    | 21.57238087 |
| ARHGEF26-AS1 | NR_037901    | 30.16466256 | 0.830822509 | 0.001737026 | 36.30698764 |
| BRCA2        | NM_000059    | 136.9793643 | 1.652896189 | 3.15E-13    | 82.87233355 |
| PRKAR2A      | NM_004157    | 117.064019  | 3.332102741 | 1.12E-10    | 35.13217572 |
| RGS2         | NM_002923    | 117.064019  | 17.1341442  | 1.85E-06    | 6.832206945 |
| CWF19L1      | NM_018294    | 86.46220574 | 6.050420622 | 5.77E-07    | 14.29028015 |
| WDR45B       | NM_019613    | 157.8177238 | 14.48222046 | 2.66E-10    | 10.897343   |
| EHD2         | NM_014601    | 101.0830299 | 13.50919439 | 3.55E-06    | 7.482535746 |
| CCDC137      | NM_199287    | 211.4923628 | 33.62126208 | 1.02E-10    | 6.290434973 |
| TRIM25       | NM_005082    | 143.6340504 | 10.58403084 | 1.16E-10    | 13.5708269  |
| MZT2B        | NM_025029    | 87.77365781 | 20.19962378 | 0.000403041 | 4.345311514 |
| TBL2         | NM_012453    | 122.3585401 | 15.61554485 | 1.88E-07    | 7.835688172 |
| KLHL20       | NM_014458    | 92.24259043 | 2.632993777 | 2.09E-08    | 35.0333492  |
| VASN         | NM_138440    | 181.3277003 | 30.02965618 | 3.15E-09    | 6.038287594 |
| KIAA1919     | NM_153369    | 66.06099693 | 7.437884466 | 8.60E-05    | 8.881691727 |
| PPID         | NM_005038    | 61.64077717 | 3.67206208  | 2.67E-05    | 16.78642023 |
| PKP3         | NM_007183    | 78.49606764 | 10.02460187 | 3.88E-05    | 7.830342654 |
| WWTR1        | NM_015472    | 46.14565165 | 3.275544527 | 0.000652094 | 14.08793294 |
| RPRD1A       | NM_018170    | 62.56379143 | 3.723813055 | 1.51E-05    | 16.80100223 |
| USP22        | NM_015276    | 135.2307615 | 12.15206866 | 5.72E-09    | 11.12820913 |
| AK1          | NM_000476    | 190.6052905 | 20.92446855 | 5.05E-12    | 9.109205811 |
| RAB20        | NM_017817    | 97.53711154 | 7.419109908 | 3.25E-07    | 13.14674034 |
| RBM22        | NM_018047    | 101.9573313 | 4.304215897 | 4.14E-09    | 23.6877828  |
| NR4A2        | NM_006186    | 81.16768465 | 6.470301898 | 2.06E-06    | 12.54465185 |
| ARC          | NM_015193    | 201.2430456 | 41.36121383 | 1.71E-08    | 4.865501443 |
| ABCA3        | NM_001089    | 77.57305339 | 8.365488304 | 2.36E-05    | 9.272985696 |
| DOCK5        | NM_024940    | 101.0830299 | 0.787220237 | 2.11E-10    | 128.4050196 |
| PEX6         | NM_000287    | 79.37036901 | 18.47213597 | 0.000904749 | 4.296761843 |
| ZNF614       | NM_025040    | 69.60691528 | 1.527533459 | 2.28E-07    | 45.56817716 |



|             |              |             |             |             |             |
|-------------|--------------|-------------|-------------|-------------|-------------|
| MALT1       | NM_173844    | 81.11897176 | 3.027616173 | 3.20E-07    | 26.79301706 |
| FAM162A     | NM_014367    | 46.58280234 | 6.513852813 | 0.00239371  | 7.151344017 |
| SUDS3       | NM_022491    | 69.60691528 | 1.321527378 | 1.11E-06    | 52.67156505 |
| CDC73       | NM_024529    | 99.7715779  | 5.588101711 | 5.25E-08    | 17.8542881  |
| ERO1LB      | NM_019891    | 49.69157001 | 1.458038776 | 0.000237597 | 34.08110322 |
| COG2        | NM_007357    | 76.26160134 | 4.330200293 | 3.71E-06    | 17.6115644  |
| CCDC57      | NM_198082    | 153.3975041 | 18.77416902 | 3.51E-09    | 8.170668112 |
| BIK         | NM_001197    | 95.73979591 | 17.96387247 | 5.11E-05    | 5.329574459 |
| DDR GK1     | NM_023935    | 134.7936109 | 17.14451995 | 3.85E-08    | 7.862198021 |
| CHD9        | NM_025134    | 80.68182108 | 1.615580951 | 4.25E-07    | 49.9398195  |
| FAM105A     | NM_019018    | 55.86039251 | 1.46701298  | 1.82E-05    | 38.07764025 |
| GINS4       | NM_032336    | 83.35343807 | 6.437259134 | 2.70E-06    | 12.94859137 |
| OSGIN1      | NM_182981    | 119.2984853 | 15.0501758  | 1.43E-07    | 7.926717063 |
| STAG3L2     | NR_040584    | 111.7207851 | 5.67179642  | 5.78E-10    | 19.69760139 |
| SELT        | NM_016275    | 64.31239418 | 5.20702306  | 3.37E-05    | 12.35108688 |
| SRFBP1      | NM_152546    | 41.67671904 | 0.572562245 | 6.33E-05    | 72.78984839 |
| RWDD4       | NM_152682    | 73.15283366 | 1.616018428 | 8.80E-08    | 45.26732641 |
| PTPN9       | NM_002833    | 60.76647581 | 4.208747722 | 0.000166296 | 14.4381369  |
| MRPS9       | NM_182640    | 101.9573313 | 1.844268914 | 7.62E-10    | 55.28333233 |
| NUCB2       | NM_005013    | 38.61666424 | 1.923451938 | 0.001687234 | 20.07675028 |
| GRB2        | NM_002086    | 148.9772843 | 8.00438005  | 1.65E-11    | 18.61197037 |
| AP3S1       | NM_001284    | 60.76647581 | 3.025795256 | 2.58E-05    | 20.08281152 |
| FBXL14      | NM_152441    | 79.8075197  | 5.429991761 | 1.54E-06    | 14.69753974 |
| WBS CR27    | NM_152559    | 62.51507855 | 9.738777166 | 0.000563188 | 6.419191803 |
| ZCCHC8      | NM_017612    | 51.00302207 | 8.726656143 | 0.002835994 | 5.844509195 |
| POFUT1      | NM_172236    | 90.00812411 | 14.37840211 | 2.94E-05    | 6.259953188 |
| KPNA2       | NM_002266    | 150.7745999 | 16.67745787 | 7.83E-10    | 9.040622443 |
| LOC646719   | NR_046262    | 175.1101649 | 14.53515976 | 4.35E-12    | 12.04735055 |
| TMEM184C    | NM_018241    | 82.4791367  | 3.246188751 | 2.35E-07    | 25.40799166 |
| ZNF496      | NM_032752    | 97.53711154 | 5.776677027 | 4.11E-08    | 16.88463992 |
| BAIAP2L1    | NM_018842    | 65.62384623 | 5.846109936 | 5.51E-05    | 11.2252159  |
| CHURC1-FNTB | NM_001202559 | 61.2036265  | 6.085060389 | 0.00017944  | 10.05801464 |
| NME5        | NM_003551    | 41.67671904 | 3.522101061 | 0.00081924  | 11.83291402 |
| TUBB6       | NM_032525    | 101.0830299 | 12.934629   | 2.58E-06    | 7.814915285 |
| RBM42       | NM_024321    | 111.2836343 | 18.32723833 | 5.67E-06    | 6.072035092 |
| NOP56       | NR_027700    | 160.9264914 | 40.19587362 | 4.75E-06    | 4.003557503 |
| RUVBL1      | NM_003707    | 93.99119317 | 5.25959254  | 9.43E-08    | 17.87043244 |
| BNIP3       | NM_004052    | 62.51507855 | 5.014542877 | 3.77E-05    | 12.46675521 |
| MSH2        | NM_001258281 | 71.8413816  | 3.981598729 | 2.42E-06    | 18.04335055 |
| HADHA       | NM_000182    | 85.58790438 | 4.094972856 | 5.91E-07    | 20.90072569 |
| TMEM221     | NM_001190844 | 58.09485881 | 9.449354636 | 0.002289264 | 6.148023971 |
| TOPBP1      | NM_007027    | 125.4673077 | 2.711830151 | 6.50E-12    | 46.26665415 |
| EAF2        | NM_018456    | 59.40631088 | 2.457309637 | 1.98E-05    | 24.17534607 |
| CPOX        | NM_000097    | 142.3225982 | 11.48081689 | 2.23E-10    | 12.39655675 |
| C16orf58    | NM_022744    | 108.1748666 | 9.140708394 | 8.60E-08    | 11.83440735 |
| CRTC2       | NM_181715    | 88.2108085  | 12.39914578 | 1.56E-05    | 7.114264973 |
| XPO4        | NM_022459    | 119.2497724 | 2.264277972 | 5.20E-11    | 52.66569471 |
| RFX1        | NM_002918    | 85.10204081 | 14.22882484 | 5.86E-05    | 5.980960606 |
| C1QBP       | NM_001212    | 117.5011696 | 10.58089611 | 3.41E-08    | 11.10503009 |
| SPTLC2      | NM_004863    | 45.22263741 | 1.598903988 | 0.000556694 | 28.2835228  |
| NRBP2       | NM_178564    | 152.0373391 | 21.37181685 | 2.04E-08    | 7.11391737  |
| NIPAL2      | NM_024759    | 94.4770567  | 2.961008719 | 1.61E-08    | 31.90705116 |
| OSTM1       | NM_014028    | 104.1917976 | 4.154046192 | 8.13E-09    | 25.08200265 |
| SMG1P3      | NR_027155    | 89.57097344 | 1.999022263 | 2.23E-08    | 44.80739163 |
| MED19       | NM_153450    | 70.52992954 | 9.860888623 | 0.00010194  | 7.152492259 |
| CCDC174     | NM_016474    | 123.2328415 | 5.314884718 | 3.41E-10    | 23.18636208 |
| XRCC2       | NM_005431    | 66.49814761 | 6.003646167 | 3.82E-05    | 11.0762936  |
| TTPA        | NM_000370    | 97.97426223 | 0.88492161  | 4.56E-11    | 110.7151878 |
| TPCN2       | NM_139075    | 87.33650713 | 10.99477594 | 9.36E-06    | 7.943454931 |
| COTL1       | NM_021149    | 206.5862795 | 14.94950233 | 3.90E-14    | 13.81894026 |
| TMEM43      | NM_024334    | 62.51507855 | 13.90327281 | 0.002729409 | 4.496428964 |
| ZZEF1       | NM_015113    | 64.74954487 | 6.552289378 | 5.75E-05    | 9.881972717 |

|                |              |             |             |             |             |
|----------------|--------------|-------------|-------------|-------------|-------------|
| LOC101929431   | NR_120660    | 99.7715779  | 1.727489845 | 1.07E-10    | 57.75523267 |
| NOMO3          | NM_001004067 | 57.22055744 | 3.17429813  | 4.71E-05    | 18.02620771 |
| TMEM42         | NM_144638    | 86.89935644 | 15.11151895 | 0.000212072 | 5.750537501 |
| EEF1E1-BLOC1S5 | NR_037618    | 66.06099693 | 2.895258459 | 7.81E-06    | 22.81696017 |
| SFXN1          | NM_022754    | 61.2036265  | 6.171098534 | 0.000152678 | 9.91778468  |
| ZNF75A         | NM_153028    | 83.35343807 | 7.771845067 | 2.70E-06    | 10.72505143 |
| FAM76B         | NM_144664    | 83.79058876 | 3.102712513 | 2.79E-07    | 27.00559217 |
| AKAP5          | NM_004857    | 42.55102041 | 4.156550546 | 0.002216951 | 10.23709923 |
| PIK3AP1        | NM_152309    | 101.0830299 | 5.341760396 | 5.11E-08    | 18.9231681  |
| SFT2D1         | NM_145169    | 97.53711154 | 5.090244128 | 2.30E-08    | 19.16157832 |
| HDAC3          | NM_003883    | 72.71568297 | 8.843190308 | 0.000154378 | 8.222788432 |
| HMGNA4         | NM_006353    | 45.22263741 | 5.993059395 | 0.004861181 | 7.545835011 |
| PCGF3          | NM_006315    | 72.71568297 | 9.746257206 | 0.000254055 | 7.460882822 |
| DDX24          | NM_020414    | 123.2328415 | 7.50055703  | 1.16E-09    | 16.42982528 |
| SMYD2          | NM_020197    | 70.48121666 | 2.277584448 | 1.44E-06    | 30.94559972 |
| NPHP3          | NM_153240    | 66.06099693 | 2.574540661 | 4.74E-06    | 25.6593333  |
| KLF13          | NM_015995    | 70.48121666 | 9.876384428 | 0.000244647 | 7.136337915 |
| FAM50A         | NM_004699    | 66.49814761 | 9.754662753 | 0.000261751 | 6.8170627   |
| CALR           | NM_004343    | 222.5185558 | 40.74160549 | 2.25E-10    | 5.461703168 |
| CYP2U1         | NM_183075    | 58.09485881 | 2.046063747 | 1.58E-05    | 28.39347449 |
| MET            | NM_000245    | 51.87732345 | 5.672778223 | 0.000952322 | 9.144958857 |
| RPS3A          | NM_001267699 | 150.7258871 | 14.38339594 | 4.90E-10    | 10.47915858 |
| PRH1-PRR4      | NR_037918    | 126.3416091 | 2.438655219 | 3.29E-11    | 51.8079014  |
| LOC389831      | NM_001242480 | 215.9125827 | 4.788063459 | 3.60E-20    | 45.09392671 |
| MOAP1          | NM_022151    | 105.066099  | 11.43055325 | 6.17E-07    | 9.191689736 |
| GNPTG          | NM_032520    | 68.73261391 | 16.87605669 | 0.002289867 | 4.072788755 |
| DUSP11         | NM_003584    | 66.06099693 | 3.506342599 | 1.68E-05    | 18.84042847 |
| SLC25A33       | NM_032315    | 144.5083517 | 5.975691008 | 1.45E-12    | 24.18270147 |
| SCAND2P        | NR_003654    | 62.07792787 | 8.302804936 | 0.000642289 | 7.476741697 |
| FAM210B        | NM_080821    | 81.55612244 | 8.724902991 | 8.75E-06    | 9.347510515 |
| PCSK7          | NM_004716    | 119.2497724 | 10.23423289 | 1.37E-08    | 11.65204796 |
| FOSB           | NM_001114171 | 62.51507855 | 14.9512735  | 0.00474227  | 4.181254431 |
| LAPTM4A        | NM_014713    | 48.33140508 | 3.562810617 | 0.000930191 | 13.56552741 |
| TSEN54         | NM_207346    | 111.7207851 | 21.77410659 | 1.73E-05    | 5.130900989 |
| SLC35F6        | NM_017877    | 64.31239418 | 15.65584027 | 0.004033329 | 4.107885178 |
| TTBK2          | NM_173500    | 70.96708023 | 2.324792947 | 2.62E-06    | 30.52619387 |
| ZNF280C        | NM_017666    | 44.34833603 | 1.897622058 | 0.000502583 | 23.37047878 |
| AHR            | NM_001621    | 136.5422136 | 2.721341174 | 2.58E-13    | 50.17460322 |
| DKFZP434I0714  | NR_033797    | 64.74954487 | 6.922663759 | 0.000166562 | 9.353270233 |
| RAB12          | NM_001025300 | 56.73469387 | 3.88246797  | 0.000193002 | 14.61304879 |
| FBXO46         | NM_001080469 | 79.37036901 | 11.00081476 | 3.68E-05    | 7.214953687 |
| MORC3          | NM_015358    | 79.37036901 | 2.652977586 | 2.28E-07    | 29.91746686 |
| CA8            | NM_004056    | 76.26160134 | 0.98419816  | 2.27E-08    | 77.48602311 |
| OSBPL7         | NM_145798    | 96.22565948 | 22.68535853 | 0.000305643 | 4.241751761 |
| PYURF          | NM_032906    | 110.4093329 | 9.494475092 | 8.85E-08    | 11.628798   |
| THOC3          | NM_032361    | 93.11689181 | 6.184057916 | 6.12E-08    | 15.05757111 |
| FAM102A        | NM_001035254 | 89.13382275 | 18.74870459 | 0.000277398 | 4.754132337 |
| OXSR1          | NM_005109    | 58.96916018 | 4.900120468 | 0.000164473 | 12.03422662 |
| RBM33          | NM_053043    | 87.33650713 | 3.420758809 | 6.90E-08    | 25.53132565 |
| APPL1          | NM_012096    | 71.8413816  | 2.891491351 | 1.47E-06    | 24.84578816 |
| SPIRE2         | NM_032451    | 122.3585401 | 17.93830182 | 7.33E-07    | 6.821077117 |
| TYMSOS         | NM_001012716 | 165.3467113 | 12.99714125 | 9.41E-12    | 12.72177535 |
| MEX3C          | NM_016626    | 62.95222924 | 3.388930244 | 7.03E-06    | 18.57584096 |
| RPL11          | NM_000975    | 118.375471  | 24.44927013 | 2.10E-05    | 4.841677089 |
| ARSJ           | NM_024590    | 35.02203299 | 1.178592388 | 0.000904848 | 29.7151359  |
| POLA1          | NM_016937    | 70.91836734 | 1.663469216 | 2.76E-06    | 42.6328102  |
| GPR157         | NM_024980    | 88.64795919 | 8.912494801 | 6.63E-06    | 9.946480886 |
| FAM188B        | NM_032222    | 73.15283366 | 6.271340796 | 9.91E-06    | 11.66462421 |
| DECR1          | NM_001359    | 111.7207851 | 2.729174736 | 1.35E-10    | 40.93573914 |
| RNPC3          | NM_017619    | 54.54894044 | 1.690696513 | 3.70E-05    | 32.26418225 |
| RNMTL1         | NM_018146    | 66.49814761 | 9.557128989 | 0.000377898 | 6.957962761 |
| CCDC122        | NM_144974    | 73.15283366 | 2.125317661 | 5.34E-07    | 34.41971758 |

|            |              |             |             |             |             |
|------------|--------------|-------------|-------------|-------------|-------------|
| TMTC3      | NM_181783    | 64.74954487 | 4.365207009 | 4.43E-05    | 14.83309835 |
| HEG1       | NM_020733    | 53.18877551 | 4.077380464 | 0.000102502 | 13.04483994 |
| USP45      | NM_001080481 | 112.1579357 | 2.569466477 | 2.58E-10    | 43.65028177 |
| TNFRSF10A  | NM_003844    | 57.65770813 | 7.431448598 | 0.000959486 | 7.758609559 |
| SMKR1      | NM_001195243 | 86.89935644 | 7.833281927 | 4.51E-06    | 11.09360767 |
| VPS4A      | NM_013245    | 139.6509813 | 21.21090085 | 5.09E-08    | 6.583925044 |
| EHD4       | NM_139265    | 93.55404248 | 8.109956006 | 8.18E-07    | 11.53570283 |
| B4GALT7    | NM_007255    | 125.0301571 | 25.16160954 | 4.93E-06    | 4.969084228 |
| LRRC58     | NM_001099678 | 195.9485244 | 3.740832878 | 1.10E-19    | 52.38098861 |
| SNX27      | NM_030918    | 83.35343807 | 3.213474146 | 1.86E-07    | 25.93872995 |
| APLF       | NM_173545    | 45.65978809 | 0.620119384 | 4.80E-05    | 73.63064155 |
| TXNDC17    | NM_032731    | 97.09996085 | 16.88902967 | 6.00E-05    | 5.749291864 |
| WIPF3      | NM_001080529 | 40.80241766 | 4.115491158 | 0.002150221 | 9.914349488 |
| SARS       | NR_034072    | 44.8341996  | 3.175508548 | 0.000246078 | 14.11874631 |
| DKK1       | NM_012242    | 153.8346547 | 18.68123837 | 1.98E-09    | 8.234713978 |
| ITFG2      | NM_018463    | 99.7715779  | 9.35830448  | 3.17E-07    | 10.66128786 |
| C14orf142  | NM_032490    | 74.07584791 | 1.651633465 | 4.86E-08    | 44.85005267 |
| TUBB2A     | NM_001069    | 154.7089561 | 29.44439144 | 2.75E-07    | 5.254275893 |
| MAP3K14    | NM_003954    | 73.15283366 | 10.52791068 | 0.000147615 | 6.948466401 |
| ROR2       | NM_004560    | 62.07792787 | 4.173979834 | 1.88E-05    | 14.87259889 |
| LOC389247  | NR_033995    | 70.91836734 | 3.612606677 | 1.62E-06    | 19.63080227 |
| PAK1IP1    | NM_017906    | 48.76855577 | 2.39138116  | 0.000111043 | 20.39346825 |
| CCDC109B   | NM_017918    | 65.18669554 | 2.636060208 | 8.53E-06    | 24.72883409 |
| ARHGAP18   | NM_033515    | 59.40631088 | 4.350075228 | 0.000171241 | 13.65638702 |
| C6orf57    | NM_145267    | 135.6679122 | 3.511442967 | 1.08E-12    | 38.63594355 |
| TRUB2      | NM_015679    | 112.1579357 | 9.727810748 | 3.04E-08    | 11.52961736 |
| ZBTB25     | NM_006977    | 92.24259043 | 7.166354223 | 5.03E-07    | 12.87162029 |
| TMEM261    | NM_033428    | 62.95222924 | 4.657227305 | 5.79E-05    | 13.51710473 |
| KLHL26     | NM_018316    | 73.58998434 | 13.64843126 | 0.000422168 | 5.391827303 |
| C19orf24   | NM_017914    | 158.6920252 | 23.37333515 | 1.59E-08    | 6.789447212 |
| TCP10L     | NM_144659    | 42.11386972 | 4.835073481 | 0.002737795 | 8.71007853  |
| ATG2A      | NM_015104    | 113.5181006 | 16.96844896 | 7.92E-07    | 6.689951499 |
| FAHD2CP    | NR_003698    | 78.93321834 | 7.758121998 | 4.83E-06    | 10.17426877 |
| FMNL2      | NM_052905    | 68.29546324 | 2.951003473 | 5.65E-06    | 23.14313211 |
| C6orf147   | NR_027005    | 54.54894044 | 5.878430899 | 0.000445716 | 9.27950696  |
| DYRK3      | NM_003582    | 126.7787599 | 4.977814991 | 4.52E-11    | 25.4687569  |
| LDLRAP1    | NM_015627    | 90.4452748  | 17.23361898 | 5.59E-05    | 5.248188143 |
| ABHD13     | NM_032859    | 122.3585401 | 2.134472955 | 9.35E-13    | 57.32494282 |
| TMEM38B    | NM_018112    | 65.62384623 | 1.178056747 | 4.32E-06    | 55.70516566 |
| IFT52      | NM_016004    | 97.09996085 | 3.817643364 | 4.83E-08    | 25.434529   |
| IDII       | NM_004508    | 58.09485881 | 11.04286902 | 0.002070979 | 5.260848308 |
| IFNGR1     | NM_000416    | 52.80033771 | 3.690700736 | 0.000546481 | 14.30631782 |
| HDHD2      | NM_032124    | 101.0830299 | 2.506696973 | 1.35E-09    | 40.32518928 |
| NUCKS1     | NM_022731    | 112.5950864 | 10.03991772 | 9.78E-08    | 11.21474194 |
| PSMA2      | NM_002787    | 40.80241766 | 2.671756234 | 0.001071988 | 15.27175913 |
| GPR89B     | NM_016334    | 110.8464837 | 2.520071486 | 1.81E-10    | 43.98545212 |
| C11orf84   | NM_138471    | 176.421617  | 15.25555676 | 5.33E-12    | 11.56441681 |
| SLBP       | NM_006527    | 150.7258871 | 10.74797632 | 5.91E-11    | 14.0236527  |
| SBF1       | NM_002972    | 84.66489013 | 20.15218301 | 0.000427331 | 4.201276363 |
| ARL2-SNX15 | NR_037650    | 94.42834386 | 11.72573553 | 2.60E-06    | 8.053084909 |
| SMG7-AS1   | NR_040063    | 53.67463907 | 1.493134767 | 7.32E-06    | 35.94761857 |
| GMPS       | NM_003875    | 63.38937993 | 3.009130836 | 1.33E-05    | 21.06567756 |
| IRF1       | NM_002198    | 183.5134537 | 18.00609122 | 1.12E-11    | 10.19174298 |
| NIPAL1     | NM_207330    | 67.42116185 | 0.96199965  | 1.46E-07    | 70.08439336 |
| REXO1      | NM_020695    | 119.2497724 | 22.16484193 | 3.48E-06    | 5.380131869 |
| UCK2       | NM_012474    | 66.93529829 | 3.778206641 | 8.39E-06    | 17.71615601 |
| ST14       | NM_021978    | 133.4334458 | 8.540299382 | 2.11E-10    | 15.62397755 |
| RFX7       | NM_022841    | 31.47611462 | 1.251491768 | 0.002045189 | 25.15087628 |
| TOX4       | NM_014828    | 62.07792787 | 5.143317876 | 5.47E-05    | 12.06962692 |
| SPTY2D1    | NM_194285    | 54.98609113 | 4.480482831 | 0.000368855 | 12.27235841 |
| MTCP1      | NM_001018025 | 49.64285714 | 4.082427923 | 0.000449168 | 12.16013071 |
| WNT9A      | NM_003395    | 141.399584  | 15.01692099 | 5.98E-09    | 9.416017042 |

|              |              |             |             |             |             |
|--------------|--------------|-------------|-------------|-------------|-------------|
| ZNF740       | NM_001004304 | 84.22773945 | 17.91005448 | 0.000456927 | 4.702818718 |
| NEU3         | NM_006656    | 69.1697646  | 7.153291219 | 7.58E-05    | 9.669641914 |
| C3orf80      | NM_001168214 | 87.77365781 | 1.321628954 | 1.58E-09    | 66.41323764 |
| PI4KAP2      | NR_003700    | 56.73469387 | 8.954674899 | 0.001052213 | 6.33576255  |
| ERH          | NM_004450    | 105.5519625 | 5.188506245 | 2.15E-09    | 20.34342015 |
| ULK4         | NM_017886    | 43.47403467 | 0.71651273  | 0.000166296 | 60.67447628 |
| HNRNPA0      | NM_006805    | 119.2497724 | 25.74386051 | 3.31E-05    | 4.632163556 |
| PAPSS1       | NM_005443    | 77.13590271 | 3.066875663 | 7.05E-07    | 25.15129767 |
| MED28        | NM_025205    | 104.6289483 | 3.977677634 | 1.34E-09    | 26.30402911 |
| CDK8         | NM_001260    | 55.86039251 | 0.798405681 | 3.95E-06    | 69.96492366 |
| HOOK3        | NM_032410    | 106.377551  | 0.662895054 | 1.56E-11    | 160.4741964 |
| RNF126       | NM_194460    | 84.22773945 | 20.13708938 | 0.001346269 | 4.182716671 |
| DDX50        | NM_024045    | 54.54894044 | 4.47216202  | 0.000440443 | 12.1974428  |
| ARPP19       | NM_006628    | 111.7207851 | 5.689739298 | 5.78E-09    | 19.63548402 |
| RNF123       | NM_022064    | 105.9404003 | 25.74226479 | 0.000101181 | 4.115426564 |
| GAS2L3       | NM_174942    | 71.40423091 | 2.21202065  | 1.30E-06    | 32.28009237 |
| FLJ36777     | NR_027441    | 66.49814761 | 3.0742114   | 1.85E-06    | 21.63096123 |
| CBX6         | NM_014292    | 120.5612245 | 16.46964741 | 2.68E-07    | 7.320206769 |
| SPPL2A       | NM_032802    | 183.5134537 | 2.645695512 | 4.59E-18    | 69.3630287  |
| ATP6V0E1     | NM_003945    | 59.89217444 | 6.556731335 | 0.000155615 | 9.134456085 |
| LRRK1        | NM_024652    | 88.2108085  | 4.9470067   | 5.46E-07    | 17.83114798 |
| ISY1-RAB43   | NM_001204890 | 65.62384623 | 7.884937455 | 0.000219052 | 8.322684435 |
| RNASEH2A     | NM_006397    | 82.4791367  | 14.70616278 | 0.000113369 | 5.608474348 |
| THBS1        | NM_003246    | 44.34833603 | 3.367921379 | 0.000329475 | 13.16786559 |
| ZNF572       | NM_152412    | 136.1050629 | 12.03376699 | 1.58E-09    | 11.31026245 |
| TRIP11       | NM_004239    | 88.2108085  | 2.968958632 | 4.39E-08    | 29.71102647 |
| PGGT1B       | NM_005023    | 80.2446704  | 0.675268813 | 1.77E-09    | 118.8336687 |
| MCOLN2       | NM_153259    | 54.98609113 | 2.651530059 | 8.68E-05    | 20.73749492 |
| RPS6KA2      | NM_021135    | 41.67671904 | 3.700527609 | 0.001234809 | 11.26237214 |
| C19orf43     | NM_024038    | 232.2820095 | 13.79903147 | 4.26E-18    | 16.83321108 |
| PDAP1        | NM_014891    | 114.8295527 | 16.51733363 | 1.69E-06    | 6.95206353  |
| ST7-OT4      | NR_002329    | 114.392402  | 3.152564628 | 6.37E-12    | 36.28550576 |
| RAB40B       | NM_006822    | 62.95222924 | 7.719723957 | 0.000339197 | 8.154725426 |
| ZNF720       | NM_001130913 | 77.57305339 | 2.379468146 | 3.43E-07    | 32.60100519 |
| VEZF1        | NM_007146    | 195.0255102 | 11.16034022 | 3.99E-15    | 17.4748714  |
| CLC          | NM_001828    | 30.60181325 | 1.433431787 | 0.002907308 | 21.34863586 |
| WDR61        | NM_025234    | 126.7787599 | 5.347410904 | 9.39E-11    | 23.708438   |
| ADIPOQ-AS1   | NR_046662    | 38.13080067 | 3.930694095 | 0.004236656 | 9.70078051  |
| KIAA1279     | NM_015634    | 66.98401118 | 5.311582966 | 3.49E-05    | 12.61093192 |
| CPNE2        | NM_152727    | 77.57305339 | 9.854687768 | 8.62E-05    | 7.871690633 |
| BOPI         | NM_015201    | 123.2328415 | 18.19734221 | 6.26E-07    | 6.772024179 |
| SETD2        | NM_014159    | 87.77365781 | 2.388208071 | 6.07E-08    | 36.75293575 |
| LOC101929259 | NR_120424    | 45.22263741 | 5.664492412 | 0.004078768 | 7.98352864  |
| APOBEC3C     | NM_014508    | 89.13382275 | 11.82493302 | 1.37E-05    | 7.537786693 |
| NRBP1        | NM_013392    | 154.7089561 | 12.2933353  | 8.81E-11    | 12.58478292 |
| GET4         | NM_015949    | 118.8126218 | 14.06712876 | 2.08E-07    | 8.446117458 |
| GTPBP4       | NM_012341    | 104.1917976 | 6.935850946 | 7.50E-08    | 15.02220829 |
| SLC45A1      | NM_001080397 | 72.71568297 | 9.297791431 | 0.000200371 | 7.820747917 |
| LOC101926913 | NR_110185    | 41.67671904 | 3.953086558 | 0.001122341 | 10.54282987 |
| CDK17        | NM_002595    | 69.1697646  | 2.334801444 | 4.32E-06    | 29.62554472 |
| MKX-AS1      | NR_121652    | 37.2564993  | 1.134503322 | 0.001601353 | 32.83948012 |
| C11orf87     | NM_207645    | 21.2755102  | 0.20416     | 0.003228011 | 104.2099833 |
| INTS6-AS1    | NR_103812    | 121.9213894 | 24.23041754 | 4.75E-05    | 5.031749421 |
| IPO13        | NM_014652    | 86.46220574 | 14.86497123 | 0.000137987 | 5.816506766 |
| AGO4         | NM_017629    | 52.75162482 | 1.672549062 | 0.000112557 | 31.53965765 |
| YY1          | NM_003403    | 95.30264523 | 6.359114389 | 1.04E-07    | 14.98677951 |
| LRRC40       | NM_017768    | 48.76855577 | 1.186657185 | 0.00020145  | 41.09742594 |
| MDGA1        | NM_153487    | 52.31447414 | 9.113761104 | 0.003151851 | 5.740162984 |
| CRISPLD2     | NM_031476    | 109.5350315 | 11.89864966 | 2.58E-07    | 9.205669102 |
| CHST3        | NM_004273    | 71.40423091 | 11.76573599 | 0.00025031  | 6.068828245 |
| NTSR1        | NM_002531    | 80.2446704  | 17.2651064  | 0.000471155 | 4.647794721 |
| ABCC1        | NM_004996    | 83.79058876 | 6.421688476 | 1.88E-06    | 13.0480619  |

|              |              |             |             |             |             |
|--------------|--------------|-------------|-------------|-------------|-------------|
| KCNQ1OT1     | NR_002728    | 101.5201806 | 5.772244333 | 2.59E-08    | 17.58764438 |
| GBA2         | NM_020944    | 110.4093329 | 18.12440381 | 2.83E-06    | 6.091749778 |
| KDM5A        | NM_001042603 | 53.67463907 | 4.26362248  | 0.000520123 | 12.58897553 |
| TMEM150C     | NM_001080506 | 39.00510204 | 3.686159774 | 0.002054244 | 10.58150065 |
| PHF13        | NM_153812    | 70.04406598 | 14.40102454 | 0.00125286  | 4.863825195 |
| RANBP17      | NM_022897    | 54.54894044 | 1.209006895 | 1.25E-05    | 45.11880011 |
| CEP250       | NM_007186    | 110.8464837 | 6.686895342 | 2.09E-08    | 16.57667393 |
| LOC101927067 | NR_125410    | 39.00510204 | 3.068190785 | 0.001691463 | 12.71273685 |
| PHKA2        | NM_000292    | 41.67671904 | 1.097012789 | 0.000116685 | 37.99109678 |
| RBM3         | NM_006743    | 55.86039251 | 12.80821338 | 0.004979101 | 4.361294652 |
| RECK         | NM_021111    | 117.9383204 | 4.378043927 | 1.08E-09    | 26.93858773 |
| PRRX2        | NM_016307    | 55.86039251 | 11.59997693 | 0.003246387 | 4.815560654 |
| CEP83-AS1    | NR_027035    | 142.759749  | 5.982309722 | 4.96E-12    | 23.8636506  |
| FUBP3        | NM_003934    | 112.1579357 | 7.13636491  | 2.23E-08    | 15.71639583 |
| ZMPSTE24     | NM_005857    | 62.51507855 | 4.641956932 | 6.80E-05    | 13.46739737 |
| ATAD5        | NM_024857    | 113.0322371 | 4.795929177 | 1.62E-09    | 23.56837078 |
| EFCAB7       | NM_032437    | 82.91628738 | 2.425884661 | 9.44E-08    | 34.17981436 |
| LINC00662    | NR_027301    | 36.38219793 | 0.264763816 | 3.43E-05    | 137.4137843 |
| LATS2        | NM_014572    | 64.74954487 | 5.503239687 | 5.27E-05    | 11.76571412 |
| B3GNT2       | NM_006577    | 118.8126218 | 9.309644117 | 1.30E-08    | 12.76231618 |
| PHLPP1       | NM_194449    | 41.67671904 | 2.042840289 | 0.001204006 | 20.40135945 |
| CWC15        | NM_016403    | 58.09485881 | 5.434838864 | 0.000118535 | 10.68934338 |
| VAMP3        | NM_004781    | 58.96916018 | 9.568388925 | 0.001171519 | 6.162914221 |
| PARP1        | NM_001618    | 86.89935644 | 8.605765159 | 3.96E-06    | 10.09780709 |
| SFXN2        | NM_178858    | 85.1507537  | 12.37658972 | 4.69E-05    | 6.879985169 |
| DYNC1LI1     | NM_016141    | 95.73979591 | 4.530177176 | 4.58E-08    | 21.13378621 |
| DARS-AS1     | NR_110200    | 105.9891132 | 2.333286418 | 4.12E-11    | 45.42481902 |
| ATP8B1       | NM_005603    | 54.98609113 | 3.169375698 | 0.000107416 | 17.34918683 |
| DOT1L        | NM_032482    | 169.7669309 | 18.54945959 | 2.29E-10    | 9.15212274  |
| LOC100130691 | NR_026966    | 75.82445064 | 3.827053626 | 7.72E-07    | 19.81274841 |
| WWC2         | NM_024949    | 69.60691528 | 2.600640105 | 5.25E-06    | 26.76530103 |
| LSM7         | NM_016199    | 90.4452748  | 16.58065747 | 6.80E-05    | 5.454866608 |
| SLC15A4      | NM_145648    | 34.14773161 | 0.802686334 | 0.00044866  | 42.54181263 |
| DENND6A      | NM_152678    | 160.0521901 | 3.288153373 | 4.50E-15    | 48.67540285 |
| LOC101926895 | NR_120372    | 83.35343807 | 6.453527573 | 1.67E-06    | 12.91594978 |
| LGALS3BP     | NM_005567    | 109.5350315 | 20.52399314 | 1.11E-05    | 5.336925947 |
| AAK1         | NM_014911    | 80.2446704  | 4.03211079  | 4.90E-07    | 19.90140514 |
| AKIRIN2      | NM_018064    | 80.2446704  | 5.846005131 | 1.60E-06    | 13.72641121 |
| ILKAP        | NM_030768    | 98.41141291 | 9.187950461 | 1.46E-06    | 10.71092115 |
| KLHL18       | NM_025010    | 62.95222924 | 3.658136327 | 1.41E-05    | 17.20882537 |
| SLC25A43     | NM_145305    | 63.38937993 | 0.864353121 | 3.69E-07    | 73.33736453 |
| TXNL4A       | NM_006701    | 126.7787599 | 9.193769644 | 1.57E-09    | 13.7896385  |
| RPS12        | NM_001016    | 148.05427   | 30.24857294 | 1.10E-06    | 4.894586939 |
| C19orf10     | NM_019107    | 100.6458792 | 13.71403554 | 6.66E-06    | 7.338895902 |
| FEM1B        | NM_015322    | 148.4914208 | 8.378029121 | 1.07E-11    | 17.72390841 |
| EAPP         | NM_018453    | 79.37036901 | 2.191371453 | 5.47E-08    | 36.21949574 |
| DLAT         | NM_001931    | 52.75162482 | 4.43783482  | 0.000756792 | 11.88679321 |
| RIBC2        | NM_015653    | 82.91628738 | 13.13224669 | 7.22E-05    | 6.313945308 |
| ANXA4        | NM_001153    | 151.6001885 | 5.183035183 | 8.73E-13    | 29.24930723 |
| TGS1         | NM_024831    | 103.754647  | 2.03209483  | 6.57E-10    | 51.05797496 |
| DCPS         | NM_014026    | 101.0830299 | 7.003997788 | 1.84E-07    | 14.43219044 |
| ACAA2        | NM_006111    | 66.06099693 | 1.501926716 | 1.77E-06    | 43.98416796 |
| FNBP4        | NM_015308    | 48.76855577 | 4.872268139 | 0.001471955 | 10.00941541 |
| PGAM1        | NM_002629    | 118.8126218 | 14.11601164 | 1.65E-07    | 8.416869069 |
| FKBP15       | NM_015258    | 62.07792787 | 1.873694802 | 9.03E-06    | 33.13129107 |
| NT5M         | NM_020201    | 120.1240738 | 4.701551675 | 3.09E-10    | 25.54987845 |
| OARD1        | NM_145063    | 105.066099  | 2.894401883 | 5.52E-11    | 36.29976182 |
| ANKRD52      | NM_173595    | 107.737716  | 15.40186449 | 2.04E-06    | 6.995108683 |
| ETHE1        | NM_014297    | 179.0932339 | 10.25781994 | 1.32E-13    | 17.45919065 |
| CCDC25       | NM_018246    | 132.1219938 | 3.700156268 | 1.22E-11    | 35.70713891 |
| NDUFS4       | NM_002495    | 72.71568297 | 1.033394038 | 1.31E-07    | 70.36588201 |
| TRIM59       | NM_173084    | 54.11178977 | 9.173442059 | 0.003966205 | 5.898744378 |

|           |              |             |             |             |             |
|-----------|--------------|-------------|-------------|-------------|-------------|
| PLK3      | NM_004073    | 178.2189327 | 33.28767728 | 3.11E-08    | 5.353901119 |
| CBR4      | NM_032783    | 46.58280234 | 3.512295569 | 0.00041347  | 13.26277969 |
| ZNF215    | NM_013250    | 44.34833603 | 1.943622355 | 0.000357199 | 22.8173626  |
| HS3ST3B1  | NM_006041    | 62.95222924 | 2.437249635 | 9.35E-06    | 25.82920861 |
| SLC35E3   | NM_018656    | 72.71568297 | 5.227672377 | 7.55E-06    | 13.90976284 |
| CDKN2AIP  | NM_017632    | 66.06099693 | 7.719406236 | 0.000230261 | 8.557782154 |
| MTCH2     | NM_014342    | 97.53711154 | 6.73720004  | 2.11E-07    | 14.4773958  |
| E2F1      | NM_005225    | 98.41141291 | 23.12544046 | 0.000270833 | 4.255547612 |
| SNTB2     | NM_006750    | 126.3416091 | 2.366407075 | 1.50E-11    | 53.38963464 |
| ANKDD1A   | NM_182703    | 64.74954487 | 7.387335805 | 0.000198662 | 8.764938616 |
| GLB1L2    | NM_138342    | 53.18877551 | 3.304386546 | 7.88E-05    | 16.0964145  |
| CENPF     | NM_016343    | 80.68182108 | 1.95255142  | 1.83E-07    | 41.32122732 |
| CNTNAP3B  | NM_001201380 | 27.49304557 | 0.164333813 | 0.002751734 | 167.2999917 |
| TMEM238   | NM_001190764 | 137.8536657 | 26.34346551 | 1.60E-06    | 5.232935872 |
| PARM1     | NM_015393    | 54.54894044 | 2.226036622 | 9.53E-05    | 24.50496093 |
| ELOF1     | NM_032377    | 88.25952138 | 16.66351407 | 0.000101845 | 5.296573161 |
| MFSD6     | NM_017694    | 70.91836734 | 3.287897429 | 2.39E-06    | 21.56951939 |
| DHX37     | NM_032656    | 112.1579357 | 10.09978266 | 1.06E-07    | 11.10498508 |
| DNAJB2    | NM_001039550 | 87.77365781 | 17.77148805 | 0.000131653 | 4.939015663 |
| UXT-AS1   | NR_028119    | 73.58998434 | 5.562723362 | 2.90E-05    | 13.22912889 |
| PHTF1     | NM_006608    | 36.8193486  | 3.233256854 | 0.003562528 | 11.38769676 |
| SMC5      | NM_015110    | 129.8875276 | 2.310923261 | 5.44E-12    | 56.20590252 |
| STRN      | NM_003162    | 55.86039251 | 1.614880557 | 4.79E-05    | 34.59103663 |
| VCPIP1    | NM_025054    | 128.1389248 | 4.063928362 | 2.55E-11    | 31.53080305 |
| C1orf74   | NM_152485    | 80.2446704  | 13.63262488 | 0.000230088 | 5.886223019 |
| FAM208B   | NM_017782    | 81.11897176 | 3.501179022 | 3.47E-07    | 23.16904427 |
| FZD4      | NM_012193    | 91.31957618 | 5.739236156 | 1.36E-07    | 15.91145123 |
| STAMBPL1  | NM_020799    | 60.76647581 | 3.489972128 | 2.20E-05    | 17.41173671 |
| PAXIP1    | NM_007349    | 41.23956835 | 2.701736    | 0.001876371 | 15.26409995 |
| DPY19L1   | NM_015283    | 120.5612245 | 2.173671998 | 4.25E-11    | 55.46431319 |
| PSMB7     | NM_002799    | 62.51507855 | 6.089332965 | 8.92E-05    | 10.2663262  |
| KCNG1     | NM_002237    | 97.53711154 | 7.92801597  | 1.88E-07    | 12.30283994 |
| EIF3M     | NM_006360    | 75.38729997 | 4.767968444 | 3.33E-06    | 15.81119944 |
| MVB12B    | NM_001011703 | 56.29754319 | 6.334102921 | 0.000292699 | 8.888005751 |
| FAM49A    | NM_030797    | 27.49304557 | 0.352804385 | 0.002805055 | 77.92716513 |
| LINC01137 | NR_038842    | 45.22263741 | 5.08784859  | 0.00203895  | 8.888361477 |
| DYM       | NM_017653    | 76.26160134 | 2.430510537 | 9.36E-07    | 31.37678285 |
| GMCL1P1   | NR_003281    | 43.91118534 | 4.39618492  | 0.002699544 | 9.988475494 |
| EIF2S3    | NM_001415    | 81.11897176 | 3.798957272 | 9.09E-07    | 21.35295713 |
| ENPP4     | NM_014936    | 45.22263741 | 3.178873703 | 0.000320701 | 14.22599374 |
| NPC2      | NM_006432    | 33.71058093 | 3.368967156 | 0.004376246 | 10.00620646 |
| SAMD4B    | NM_018028    | 59.40631088 | 9.091160653 | 0.000608743 | 6.534513375 |
| BAZ1B     | NM_032408    | 124.1071429 | 5.412705791 | 3.61E-10    | 22.92885437 |
| ERP44     | NM_015051    | 110.8464837 | 3.399337342 | 4.65E-10    | 32.60826229 |
| HFM1      | NM_001017975 | 28.8532105  | 0.162375452 | 0.002107591 | 177.6944123 |
| KAZALD1   | NM_030929    | 158.740738  | 36.99362765 | 1.16E-06    | 4.291029243 |
| APMAP     | NM_020531    | 137.8536657 | 4.27318989  | 2.33E-12    | 32.260131   |
| NUFIP2    | NM_020772    | 126.7787599 | 8.881609539 | 9.98E-10    | 14.2743001  |
| RHPN2     | NM_033103    | 117.0153061 | 5.109507842 | 1.19E-09    | 22.90148283 |
| KMT2B     | NM_014727    | 95.30264523 | 16.79516461 | 3.07E-05    | 5.674409714 |
| PLBD1-AS1 | NR_120465    | 38.56795136 | 1.427242728 | 0.002822269 | 27.02269951 |
| AGK       | NM_018238    | 173.3128494 | 1.324181454 | 2.88E-17    | 130.8830061 |
| ZNF321P   | NR_037805    | 42.59973328 | 3.990390568 | 0.003011876 | 10.67557989 |
| SOX9      | NM_000346    | 113.5181006 | 20.50862871 | 5.47E-06    | 5.53513851  |
| SKA1      | NM_001039535 | 68.73261391 | 3.849322607 | 1.03E-05    | 17.85576865 |
| SPEN      | NM_015001    | 109.4863187 | 5.584596514 | 7.78E-09    | 19.60505444 |
| UBE2Q1    | NM_017582    | 113.4693878 | 12.54416031 | 2.45E-07    | 9.045594521 |
| RALB      | NM_002881    | 57.65770813 | 3.926020332 | 0.000226388 | 14.6860442  |
| SNHG11    | NR_003239    | 115.7038541 | 17.04392775 | 2.49E-06    | 6.788567506 |
| DDB1      | NM_001923    | 73.15283366 | 9.456411826 | 0.000128009 | 7.735791863 |
| ZW10      | NM_004724    | 61.2036265  | 1.45914921  | 1.07E-05    | 41.94473469 |
| HIP1R     | NM_003959    | 109.9234694 | 19.69562201 | 8.18E-06    | 5.581111849 |

|               |              |             |             |             |             |
|---------------|--------------|-------------|-------------|-------------|-------------|
| CHAC2         | NM_001008708 | 76.69875203 | 7.247984966 | 1.63E-05    | 10.58207935 |
| PNRC2         | NM_017761    | 130.7618289 | 15.85847221 | 3.00E-08    | 8.245550215 |
| NHEJ1         | NM_024782    | 136.5422136 | 4.756263973 | 1.64E-11    | 28.70787122 |
| MED31         | NM_016060    | 68.73261391 | 3.601195637 | 2.56E-06    | 19.08605387 |
| C5orf15       | NM_020199    | 70.04406598 | 4.723147542 | 4.19E-06    | 14.8299551  |
| TAF8          | NM_138572    | 115.2667034 | 6.650075427 | 6.36E-09    | 17.33314225 |
| ATXN7L2       | NM_153340    | 90.00812411 | 17.7936111  | 8.85E-05    | 5.058451802 |
| NAA50         | NM_025146    | 129.8875276 | 4.531273678 | 2.03E-11    | 28.66468388 |
| MYO10         | NM_012334    | 112.5950864 | 1.273952635 | 2.96E-11    | 88.3824746  |
| GPR125        | NM_145290    | 85.10204081 | 0.989682035 | 4.12E-09    | 85.98927511 |
| SPC24         | NM_182513    | 106.8634146 | 16.7222138  | 5.37E-06    | 6.390506419 |
| HINT2         | NM_032593    | 127.2646234 | 23.93480943 | 4.71E-06    | 5.317135437 |
| PCNX          | NM_014982    | 99.28571429 | 3.841944958 | 7.26E-09    | 25.84256552 |
| SCAI          | NM_173690    | 106.377551  | 4.160365874 | 1.71E-08    | 25.56927786 |
| MAL2          | NM_052886    | 95.30264523 | 2.330791163 | 3.72E-09    | 40.88853895 |
| ARPC4-TTLL3   | NM_001198793 | 121.4842387 | 12.3084798  | 5.26E-08    | 9.869962877 |
| ZBTB11        | NM_014415    | 47.45710371 | 3.223464454 | 0.000226483 | 14.72239089 |
| EIF3F         | NM_003754    | 82.04198601 | 6.17465526  | 1.07E-06    | 13.28689337 |
| LRRC47        | NM_020710    | 177.2959184 | 10.85648947 | 1.53E-13    | 16.33087001 |
| RAB38         | NM_022337    | 55.86039251 | 0.916273808 | 2.14E-06    | 60.96473786 |
| DNAJC25-GNG10 | NM_004125    | 249.5744506 | 6.582580099 | 3.35E-22    | 37.91438111 |
| GBAP1         | NR_002188    | 70.96708023 | 13.68048697 | 0.000533353 | 5.187467405 |
| PISD          | NM_014338    | 105.5032497 | 22.78390822 | 6.78E-05    | 4.630603697 |
| DNAJC3        | NM_006260    | 122.7956908 | 2.313084981 | 2.65E-11    | 53.08741003 |
| LSM14B        | NM_144703    | 79.8075197  | 16.22357665 | 0.000320657 | 4.919230909 |
| CNOT6         | NM_015455    | 106.4262639 | 3.077222142 | 1.13E-09    | 34.5851742  |
| TMEM180       | NM_024789    | 106.4262639 | 20.96747784 | 2.95E-05    | 5.075778054 |
| EXOSC6        | NM_058219    | 111.7207851 | 21.43664442 | 6.79E-05    | 5.211673192 |
| FAM117A       | NM_030802    | 132.5591446 | 11.05609507 | 2.46E-09    | 11.98968928 |
| PCNXL4        | NM_022495    | 67.85831254 | 3.259541841 | 2.97E-06    | 20.8183591  |
| FBXO42        | NM_018994    | 91.36828904 | 4.884089309 | 2.68E-07    | 18.70733381 |
| EGLN3         | NM_022073    | 119.2497724 | 2.453282605 | 2.65E-12    | 48.60824928 |
| WASL          | NM_003941    | 109.4863187 | 2.38650293  | 3.39E-10    | 45.87730328 |
| TTLL5         | NM_015072    | 70.04406598 | 2.589871323 | 2.99E-06    | 27.04538459 |
| GEMIN6        | NM_024775    | 51.44017277 | 4.217332328 | 0.000382652 | 12.19732494 |
| UVSSA         | NM_020894    | 107.3005653 | 9.737385282 | 1.77E-07    | 11.01944333 |
| TMEM183A      | NM_138391    | 97.53711154 | 5.406961501 | 8.82E-08    | 18.03917256 |
| LPCAT3        | NM_005768    | 105.5032497 | 9.307361938 | 3.01E-07    | 11.33546222 |
| USP12         | NM_182488    | 141.399584  | 3.078086909 | 7.52E-13    | 45.93748915 |
| LOC100128568  | NR_046376    | 101.0830299 | 10.86176342 | 1.02E-06    | 9.306318509 |
| LRP4          | NM_002334    | 62.07792787 | 5.985260755 | 8.88E-05    | 10.37180006 |
| COG3          | NM_031431    | 119.6869232 | 3.17280674  | 4.03E-11    | 37.72272722 |
| LOC646762     | NR_024278    | 86.89935644 | 2.788124031 | 4.29E-08    | 31.16767958 |
| COMMD1        | NM_152516    | 101.9573313 | 2.445790465 | 3.48E-09    | 41.68686269 |
| CRADD         | NM_003805    | 55.86039251 | 3.955726528 | 6.11E-05    | 14.12139897 |
| ENDOD1        | NM_015036    | 48.81726865 | 2.71361256  | 0.000256722 | 17.98977104 |
| MSANTD4       | NM_032424    | 72.71568297 | 6.366476321 | 3.02E-05    | 11.42165294 |
| ANKS6         | NM_173551    | 48.76855577 | 5.87440134  | 0.001571808 | 8.301876727 |
| PAG1          | NM_018440    | 96.66281017 | 3.981992719 | 1.20E-08    | 24.27498416 |

**Sheet4: Pausing genes in HMBA treated HCT116 cells expressing shAFF1 and shAFF4 (shAFF1+4)**

| Symbol       | Gene ID      | Promoter RPK | Gene Body RPK | pValue      | Pause Ratio(TR) |
|--------------|--------------|--------------|---------------|-------------|-----------------|
| RFX5         | NM_001025603 | 63.8638001   | 9.869511507   | 0.000396809 | 6.470816722     |
| MRPS12       | NM_021107    | 164.0220179  | 14.9492628    | 6.06E-11    | 10.97191347     |
| APTX         | NR_036579    | 165.0549929  | 7.459126789   | 1.15E-14    | 22.1279243      |
| HFE          | NM_139008    | 72.5186893   | 10.64624728   | 0.000254369 | 6.811666818     |
| MEST         | NM_001253902 | 51.94951438  | 6.919821296   | 0.002100935 | 7.50734913      |
| PLD3         | NM_001031696 | 73.71213579  | 13.52660516   | 0.000327304 | 5.449418749     |
| NUDT15       | NM_018283    | 170.0593965  | 14.18151246   | 9.56E-13    | 11.99162621     |
| TRMT1        | NM_017722    | 72.67916077  | 5.312223502   | 1.36E-05    | 13.68149528     |
| CALU         | NM_001199672 | 192.6945215  | 6.208854867   | 1.90E-17    | 31.03543658     |
| LMLN         | NR_026787    | 211.6791608  | 3.812741408   | 4.71E-20    | 55.51888736     |
| NUDT4        | NM_001301022 | 83.56047148  | 7.785160257   | 3.02E-06    | 10.7333014      |
| TMEM222      | NM_032125    | 132.4110608  | 14.20768288   | 5.86E-09    | 9.319680203     |
| MGST1        | NM_001260512 | 140.032975   | 3.17523536    | 6.63E-15    | 44.10160481     |
| CHCHD3       | NM_017812    | 162.9890429  | 4.842896454   | 2.64E-14    | 33.65528139     |
| OCIAD1       | NM_001079840 | 80.62201792  | 4.957619773   | 8.92E-07    | 16.26224309     |
| MUTYH        | NM_001293190 | 180.9407072  | 23.7060405    | 6.06E-11    | 7.632683629     |
| TRMT1L       | NM_001202423 | 89.4373786   | 3.677216691   | 1.08E-07    | 24.32203106     |
| ENSA         | NM_207044    | 219.6220179  | 11.39100065   | 4.84E-19    | 19.28030949     |
| RBM10        | NM_001204466 | 149.0088072  | 7.956952978   | 1.62E-12    | 18.72686788     |
| AFF4         | NM_014423    | 217.5560679  | 7.535058134   | 7.28E-19    | 28.87251352     |
| WRNIP1       | NM_020135    | 57.8264215   | 8.284957517   | 0.000703728 | 6.979688354     |
| HMGN3        | NM_001201363 | 138.2879679  | 6.070908326   | 1.06E-11    | 22.77879363     |
| SYT17        | NM_016524    | 56.79344649  | 6.706241344   | 0.000242198 | 8.468744796     |
| PUF60        | NM_078480    | 110.3274965  | 21.93828626   | 1.78E-05    | 5.028993383     |
| EPT1         | NM_033505    | 267.2791608  | 5.416079784   | 2.19E-25    | 49.34919193     |
| CHST7        | NM_019886    | 145.0373786  | 4.0728044     | 2.01E-14    | 35.61118196     |
| C6orf52      | NR_026736    | 51.94951438  | 5.45124545    | 0.000553156 | 9.529843199     |
| TAF1C        | NM_139353    | 156.0791608  | 13.68008806   | 2.33E-11    | 11.40922194     |
| IDNK         | NR_046422    | 116.5253465  | 14.13905664   | 1.99E-07    | 8.241380562     |
| YY1AP1       | NM_001198906 | 99.44618576  | 8.69389208    | 8.16E-08    | 11.43862666     |
| FDXR         | NM_024417    | 341.7033286  | 28.18026115   | 1.16E-24    | 12.12562676     |
| GORAB        | NR_027397    | 115.3319     | 4.668829431   | 9.12E-11    | 24.70253021     |
| ST3GAL3      | NR_073021    | 110.3274965  | 5.773626927   | 2.21E-09    | 19.10887175     |
| ATP5G3       | NM_001689    | 246.3890429  | 21.89294729   | 3.99E-17    | 11.25426557     |
| GUSB         | NM_000181    | 105.4835644  | 14.24613765   | 2.11E-06    | 7.404362288     |
| PDCD6        | NR_073609    | 134.1560679  | 13.26761935   | 9.30E-10    | 10.11154031     |
| ARNTL2       | NM_001248005 | 48.69011787  | 4.811997446   | 0.001350045 | 10.11848373     |
| CXorf40B     | NM_001013845 | 62.67035361  | 3.387273189   | 3.77E-06    | 18.50171218     |
| CPSF3L       | NM_001256460 | 115.3319     | 22.18147794   | 1.06E-05    | 5.199468691     |
| GSTT2B       | NM_001080843 | 329.9495144  | 72.97599912   | 3.97E-13    | 4.521342885     |
| NPM1         | NM_002520    | 152.9802357  | 18.4736027    | 5.01E-10    | 8.281017961     |
| CD320        | NM_016579    | 215.6505893  | 28.25191332   | 1.60E-12    | 7.633132203     |
| GPR126       | NM_001032394 | 90.47035361  | 2.547898776   | 1.42E-08    | 35.50782883     |
| FERMT2       | NM_001134999 | 87.37142857  | 3.711387399   | 2.70E-08    | 23.54144668     |
| ZNF384       | NM_001135734 | 60.76487506  | 12.13761471   | 0.004012653 | 5.00632756      |
| C1orf131     | NM_001300830 | 237.4132108  | 8.129164249   | 1.99E-22    | 29.20511918     |
| RAE1         | NM_003610    | 69.74070721  | 9.781205454   | 0.000282048 | 7.130072826     |
| MORF4L2      | NM_001142429 | 60.76487506  | 8.154141585   | 0.000282048 | 7.452025995     |
| GAB1         | NM_207123    | 98.41321075  | 3.56803359    | 4.35E-09    | 27.58191824     |
| LIPT1        | NM_001204830 | 215.4901179  | 10.16196828   | 1.05E-18    | 21.20554915     |
| DYX1C1-CCPG1 | NR_037923    | 83.56047148  | 3.961738217   | 1.25E-07    | 21.09187102     |
| PLSCR3       | NM_020360    | 129.1516643  | 26.50328148   | 5.31E-06    | 4.873044283     |
| NEK2         | NM_002497    | 184.7516643  | 6.817565441   | 1.45E-17    | 27.0993606      |
| STK10        | NM_005990    | 116.3648751  | 7.716572142   | 4.17E-09    | 15.07986615     |
| GPRC5B       | NM_016235    | 117.2373786  | 7.295988391   | 1.09E-09    | 16.06874522     |
| CDC27        | NM_001293091 | 160.0505893  | 6.717907374   | 1.91E-13    | 23.82447099     |
| GOLT1B       | NM_016072    | 51.07701085  | 1.430429859   | 2.13E-05    | 35.70745571     |
| SERF1A       | NM_021967    | 329.7890429  | 31.51696455   | 6.82E-22    | 10.46385804     |
| ERBB2IP      | NM_001253701 | 36.93630363  | 3.202172097   | 0.003441496 | 11.53476531     |
| PRKAG1       | NM_002733    | 186.8176143  | 16.09182052   | 2.50E-13    | 11.60947663     |



|            |              |             |             |             |             |
|------------|--------------|-------------|-------------|-------------|-------------|
| STXBP2     | NR_073560    | 81.49452145 | 10.25850096 | 7.86E-06    | 7.94409649  |
| PHF7       | NM_016483    | 191.6615464 | 14.21701736 | 2.30E-14    | 13.48113613 |
| ELP4       | NM_001288725 | 162.9890429 | 2.45393245  | 1.25E-15    | 66.41953118 |
| ZNF281     | NM_001281293 | 140.032975  | 4.358634949 | 2.85E-14    | 32.12771352 |
| TUBD1      | NM_001193612 | 103.5780858 | 12.62283084 | 1.25E-06    | 8.205614661 |
| FIS1       | NM_016068    | 184.9121358 | 13.87501068 | 3.81E-14    | 13.32699052 |
| FN1        | NM_212476    | 59.57142857 | 4.554209429 | 0.00011909  | 13.08052023 |
| AMPD3      | NM_001025389 | 51.07701085 | 9.39087803  | 0.002707069 | 5.439002688 |
| ITPR2      | NM_002223    | 213.5846393 | 3.607634694 | 2.42E-20    | 59.20351073 |
| FAM200B    | NM_001145191 | 232.5692786 | 8.944134328 | 8.46E-22    | 26.0024358  |
| SLC43A3    | NM_199329    | 58.69892504 | 8.07038459  | 0.000385271 | 7.273373949 |
| PTK2B      | NM_173176    | 61.79785007 | 6.286074407 | 7.50E-05    | 9.830912915 |
| COX10-AS1  | NR_049718    | 183.8791608 | 5.120409064 | 1.39E-17    | 35.91102947 |
| ADIPOR1    | NM_001290629 | 53.69452145 | 11.98891598 | 0.004047979 | 4.478680268 |
| PRIMPOL    | NM_152683    | 119.1428571 | 4.300317944 | 7.89E-11    | 27.70559263 |
| MMP24-AS1  | NR_102706    | 217.5560679 | 31.86960881 | 3.30E-11    | 6.826442997 |
| ALG9       | NM_001077691 | 131.3780858 | 5.174171075 | 1.51E-11    | 25.39113684 |
| CCNB2      | NM_004701    | 205.6417822 | 10.41747563 | 3.26E-17    | 19.74007806 |
| C1RL       | NM_001297640 | 73.71213579 | 14.57223303 | 0.000734525 | 5.05839672  |
| SERTAD1    | NM_013376    | 149.1692786 | 26.30997912 | 9.70E-08    | 5.669684417 |
| ANAPC11    | NM_016476    | 141.386893  | 26.68667085 | 5.05E-07    | 5.29803413  |
| OGT        | NM_181673    | 184.7516643 | 3.214510047 | 1.48E-18    | 57.4742843  |
| NEDD4L     | NM_015277    | 45.75166431 | 6.075127913 | 0.002605142 | 7.530979589 |
| PPIP5K1    | NM_001130859 | 55.76047148 | 9.095478512 | 0.000905751 | 6.130570415 |
| CCDC59     | NM_014167    | 110.3274965 | 0.665695748 | 3.70E-16    | 165.732614  |
| PLAGL1     | NM_001289049 | 72.67916077 | 4.144987544 | 9.29E-06    | 17.53422899 |
| MOCS2      | NM_176806    | 191.6615464 | 4.804416504 | 6.13E-20    | 39.89278329 |
| TDP1       | NM_001008744 | 231.3758322 | 7.352585495 | 2.81E-20    | 31.4686354  |
| ST6GALNAC4 | NM_175040    | 125.1802357 | 7.29181115  | 6.16E-11    | 17.16723502 |
| TBCK       | NM_001163437 | 187.8505893 | 2.847636851 | 3.78E-18    | 65.96718583 |
| TOMM34     | NM_006809    | 157.1121358 | 14.72831075 | 3.23E-11    | 10.66735612 |
| FAS        | NR_028036    | 72.67916077 | 5.416794493 | 6.11E-06    | 13.41737459 |
| CDC25C     | NM_001287582 | 126.3736822 | 5.461767139 | 2.94E-11    | 23.13787443 |
| CLYBL      | NR_104592    | 180.9407072 | 5.503451783 | 6.53E-16    | 32.87767648 |
| ATF2       | NR_045768    | 102.3846393 | 2.935756386 | 7.80E-10    | 34.8750461  |
| POMT1      | NM_007171    | 92.37583215 | 13.58470126 | 1.03E-05    | 6.799989957 |
| TPM4       | NM_001145160 | 115.3319    | 15.51871472 | 5.32E-07    | 7.431794588 |
| CCT8       | NM_001282909 | 134.1560679 | 7.874488689 | 5.90E-11    | 17.03679733 |
| RPAIN      | NR_027685    | 115.3319    | 22.17115993 | 1.08E-05    | 5.201888419 |
| BIRC6      | NM_016252    | 89.59785007 | 3.763856238 | 3.90E-08    | 23.80480135 |
| NDC1       | NM_018087    | 93.56927864 | 5.297155703 | 6.36E-08    | 17.66406047 |
| MRPS18C    | NM_001297767 | 133.2835644 | 9.985032814 | 1.01E-10    | 13.34833514 |
| COL4A5     | NM_000495    | 49.72309288 | 1.457521501 | 0.000276003 | 34.11482634 |
| SAMHD1     | NM_015474    | 149.1692786 | 5.977450002 | 2.08E-13    | 24.95533691 |
| ERGIC3     | NM_198398    | 153.1407072 | 11.19857879 | 4.87E-12    | 13.6750127  |
| CTSL       | NM_145918    | 185.9451108 | 13.94012775 | 3.53E-14    | 13.33883836 |
| UPF2       | NM_080599    | 41.78023574 | 3.828696301 | 0.000992264 | 10.91239222 |
| ATP5G2     | NM_005176    | 63.70332862 | 13.34776305 | 0.001970485 | 4.772584618 |
| YIPF1      | NR_036640    | 75.77808581 | 6.701753555 | 1.25E-05    | 11.30720269 |
| ACAD9      | NR_033426    | 109.6154644 | 12.27672719 | 3.84E-07    | 8.928720394 |
| HDAC11-AS1 | NR_046690    | 132.2505893 | 13.03245305 | 2.99E-09    | 10.14778944 |
| LINC00909  | NR_024484    | 112.3934465 | 21.11788669 | 7.75E-06    | 5.322191948 |
| CHDH       | NM_018397    | 104.4505893 | 9.415646861 | 1.26E-07    | 11.09329936 |
| TCEB1      | NM_001204857 | 165.0549929 | 10.26087001 | 1.54E-13    | 16.08586725 |
| KPNA3      | NM_002267    | 109.2945215 | 3.704696291 | 2.38E-10    | 29.5016144  |
| ARL4A      | NM_001195396 | 113.26595   | 27.52708548 | 4.90E-05    | 4.114709132 |
| RFXANK     | NM_001278727 | 181.9736822 | 16.65482035 | 5.09E-13    | 10.92618704 |
| PRADC1     | NM_032319    | 140.1934465 | 19.923153   | 3.53E-08    | 7.036709825 |
| GALNT18    | NM_198516    | 149.3297501 | 7.3565856   | 6.25E-12    | 20.29878509 |
| KDELR3     | NM_016657    | 177.8417822 | 15.57750428 | 9.75E-13    | 11.41657732 |
| TNPO3      | NM_012470    | 350.6791608 | 5.961843206 | 1.55E-32    | 58.82059435 |
| ATG5       | NM_004849    | 172.9978501 | 3.8611612   | 9.23E-16    | 44.80461734 |

|              |              |             |             |             |             |
|--------------|--------------|-------------|-------------|-------------|-------------|
| ZGPAT        | NM_181485    | 70.61321075 | 5.901709755 | 7.01E-06    | 11.96487352 |
| CFLAR        | NM_001202517 | 124.3077322 | 8.965454934 | 4.44E-10    | 13.86518957 |
| LOC644656    | NR_036539    | 196.8264215 | 38.16923403 | 1.83E-07    | 5.15667727  |
| ZNF518A      | NM_014803    | 186.9780858 | 6.976626094 | 1.11E-16    | 26.80064594 |
| EPC1         | NR_104159    | 137.2549929 | 30.37229587 | 1.28E-05    | 4.519085206 |
| B4GALT4      | NM_003778    | 189.9165394 | 5.838381365 | 1.80E-17    | 32.52897122 |
| AGPAT9       | NM_032717    | 159.0176143 | 3.87137281  | 8.22E-15    | 41.07525215 |
| NUDT16P1     | NR_027766    | 155.9186893 | 24.28376233 | 8.43E-09    | 6.420697385 |
| LOC100507053 | NR_037884    | 221.5274965 | 2.719295457 | 8.42E-22    | 81.46503385 |
| CENPBD1P1    | NR_026052    | 148.2967751 | 21.59988736 | 6.99E-09    | 6.865627244 |
| STK33        | NM_001289059 | 55.92094295 | 2.067414756 | 4.11E-05    | 27.04872972 |
| OGG1         | NM_016828    | 55.92094295 | 11.87152463 | 0.002323649 | 4.710510628 |
| FGD5-AS1     | NR_046254    | 144.0044036 | 7.055903535 | 6.16E-13    | 20.40906638 |
| PSMB3        | NR_104194    | 116.3648751 | 13.83233659 | 9.48E-08    | 8.412524835 |
| TMEM9B       | NM_001286095 | 190.7890429 | 12.55699091 | 7.95E-15    | 15.19385052 |
| ZNF101       | NM_033204    | 141.2264215 | 5.919075075 | 4.98E-13    | 23.85954219 |
| LINC01128    | NR_047526    | 194.7604715 | 5.378532081 | 1.34E-19    | 36.21071112 |
| SCAMP5       | NM_001178111 | 82.52749646 | 7.853143417 | 3.16E-06    | 10.50884876 |
| UPF3B        | NM_080632    | 115.3319    | 4.802135491 | 7.06E-11    | 24.01679425 |
| UBTD1        | NM_024954    | 65.76927864 | 8.607136096 | 0.000171557 | 7.641249994 |
| SPCS2        | NM_014752    | 139.1604715 | 5.120514097 | 3.23E-13    | 27.17705075 |
| ALG13        | NM_001257230 | 140.032975  | 2.551205686 | 5.08E-14    | 54.88893969 |
| UBE2E1       | NM_182666    | 52.66154644 | 3.976277693 | 0.000143233 | 13.24393076 |
| CISH         | NM_013324    | 189.7560679 | 16.11660754 | 1.57E-13    | 11.77394606 |
| DCUN1D4      | NM_001287757 | 74.58463932 | 7.948080783 | 2.99E-05    | 9.383981034 |
| NUDT1        | NM_198949    | 236.3802357 | 20.9059339  | 4.80E-17    | 11.3068489  |
| DDX12P       | NR_033399    | 156.0791608 | 12.60536862 | 1.12E-11    | 12.38195926 |
| DCLRE1A      | NM_001271816 | 61.95832155 | 4.073033341 | 2.98E-05    | 15.21183756 |
| ZNF324       | NM_014347    | 174.9033286 | 18.34173798 | 5.53E-12    | 9.535810011 |
| HOOK2        | NM_001100176 | 76.49011787 | 18.42141466 | 0.001139951 | 4.152239081 |
| ZFP2         | NM_030613    | 86.49892504 | 3.189879244 | 2.09E-08    | 27.11667697 |
| FXYD5        | NM_001164605 | 75.61761433 | 10.43610741 | 6.85E-05    | 7.245768117 |
| TMEM218      | NM_001258238 | 46.78463932 | 6.113784058 | 0.001787957 | 7.652321194 |
| DAG1         | NM_004393    | 117.2373786 | 11.1245201  | 1.94E-08    | 10.53864594 |
| VPS13C       | NM_017684    | 145.1978501 | 1.489485148 | 2.68E-14    | 97.48190524 |
| NDUFA9       | NM_005002    | 116.3648751 | 3.38858601  | 7.68E-11    | 34.34024537 |
| BOD1         | NM_001159651 | 40.74726073 | 3.156743121 | 0.003230861 | 12.9080065  |
| CCDC14       | NM_022757    | 188.7230929 | 3.034178534 | 8.92E-19    | 62.19907325 |
| APAF1        | NM_013229    | 146.2308251 | 4.007790694 | 4.14E-13    | 36.4866422  |
| SPINK2       | NR_073417    | 87.53190005 | 2.535238382 | 4.02E-09    | 34.52610242 |
| CTF1         | NM_001142544 | 98.41321075 | 15.63428742 | 1.39E-05    | 6.294703949 |
| CCNA2        | NM_001237    | 195.7934465 | 6.197007989 | 5.78E-20    | 31.59483525 |
| RHOT1        | NM_001288755 | 115.1714286 | 5.55024457  | 7.57E-10    | 20.75069434 |
| TARBP1       | NM_005646    | 147.1033286 | 4.572006759 | 4.75E-13    | 32.17478372 |
| TEC          | NM_003215    | 315.8088072 | 4.551138604 | 3.67E-30    | 69.39116442 |
| RNFT2        | NM_032814    | 86.49892504 | 8.88470938  | 3.13E-06    | 9.735706745 |
| PRPF40A      | NM_017892    | 173.8703536 | 4.849469002 | 3.72E-16    | 35.85348283 |
| RRP12        | NM_015179    | 95.47475719 | 7.754289169 | 3.55E-07    | 12.31250926 |
| HINT3        | NM_138571    | 61.79785007 | 4.350611047 | 3.65E-05    | 14.20440701 |
| SLC37A4      | NM_001164278 | 144.1648751 | 29.58475147 | 5.96E-07    | 4.87294528  |
| HSPA14       | NM_016299    | 103.5780858 | 7.680338032 | 4.29E-08    | 13.48613634 |
| SPHK1        | NM_021972    | 134.3165394 | 24.26146868 | 1.34E-06    | 5.536208099 |
| MEIS3        | NM_001301059 | 63.54285714 | 12.55520388 | 0.002218476 | 5.061077283 |
| LINC00883    | NR_028301    | 196.66595   | 6.048250993 | 9.38E-20    | 32.51616877 |
| CCNO         | NM_021147    | 171.0923715 | 42.2669623  | 1.73E-06    | 4.047898458 |
| NCK1-AS1     | NR_110175    | 199.7648751 | 5.265959199 | 8.76E-20    | 37.93513537 |
| CTNBL1       | NM_001281495 | 101.3516643 | 5.317929561 | 2.51E-08    | 19.0584819  |
| LOC554206    | NR_038379    | 138.1274965 | 27.57528878 | 3.48E-05    | 5.009104259 |
| LOC283922    | NR_026950    | 167.9934465 | 11.27570247 | 1.55E-13    | 14.89871224 |
| PLAUR        | NM_001005377 | 147.1033286 | 10.77352805 | 6.65E-11    | 13.65414634 |
| UPP1         | NM_001287426 | 111.3604715 | 11.53395845 | 1.34E-07    | 9.6550089   |
| PCMTD1       | NM_001286782 | 112.232975  | 3.113170948 | 8.82E-11    | 36.0510158  |

|              |              |             |             |             |             |
|--------------|--------------|-------------|-------------|-------------|-------------|
| SEC14L1      | NM_001039573 | 88.40440358 | 9.385404701 | 1.60E-06    | 9.419349128 |
| TBC1D14      | NM_001113361 | 151.0747572 | 9.066344033 | 2.57E-12    | 16.66325    |
| JDP2         | NM_001135047 | 63.70332862 | 9.167518078 | 0.000283077 | 6.948808618 |
| SPIN2B       | NM_001282462 | 113.26595   | 10.89826638 | 6.20E-08    | 10.39302455 |
| RBM39        | NR_040724    | 148.1363036 | 11.75396519 | 8.82E-11    | 12.60309191 |
| NAPB         | NM_022080    | 81.65499293 | 4.920914764 | 6.31E-07    | 16.59345809 |
| CARD10       | NM_014550    | 50.75606789 | 8.460819723 | 0.002441823 | 5.998953949 |
| LOC100507506 | NR_103764    | 236.5407072 | 4.741559013 | 1.89E-24    | 49.88669477 |
| SC5D         | NM_006918    | 180.9407072 | 4.400390561 | 1.03E-17    | 41.1192381  |
| LRCH1        | NM_001164211 | 70.61321075 | 5.232633203 | 1.25E-05    | 13.49477558 |
| DSN1         | NM_001145318 | 125.3407072 | 7.858495921 | 1.21E-10    | 15.94970698 |
| PACSIN3      | NM_016223    | 68.7077322  | 15.30351458 | 0.001689323 | 4.489670123 |
| MOCS1        | NM_001075098 | 130.1846393 | 6.468901474 | 3.87E-11    | 20.12469039 |
| NQO2         | NM_001290222 | 291.9802357 | 12.516115   | 4.01E-25    | 23.32834396 |
| RINL         | NM_198445    | 62.67035361 | 12.74665324 | 0.001872508 | 4.916612418 |
| MAGT1        | NM_032121    | 68.7077322  | 3.634252083 | 2.54E-06    | 18.90560441 |
| ZSWIM5       | NM_020883    | 64.57583215 | 3.734109534 | 6.53E-06    | 17.29350239 |
| SRR          | NM_021947    | 201.8308251 | 15.29723208 | 1.60E-15    | 13.19394411 |
| RPL22        | NM_000983    | 134.1560679 | 13.71638442 | 3.08E-09    | 9.780716532 |
| HHLA3        | NM_001036645 | 209.7736822 | 6.719003685 | 2.63E-20    | 31.22095061 |
| SLC35A2      | NM_001282647 | 119.1428571 | 14.63536258 | 1.30E-07    | 8.140751996 |
| GLYCTK       | NR_026699    | 121.5297501 | 5.826407543 | 2.82E-11    | 20.85843622 |
| LOC101929574 | NR_120661    | 48.69011787 | 4.379359425 | 0.000328899 | 11.11809129 |
| RBAK-RBAKDN  | NM_001204513 | 158.1451108 | 8.124321078 | 7.30E-13    | 19.46564018 |
| API5         | NM_001142930 | 191.6615464 | 4.532850581 | 4.29E-19    | 42.28278498 |
| PHOSPHO2     | NM_001199288 | 191.8220179 | 4.170839302 | 1.19E-20    | 45.99122719 |
| ZNF182       | NM_006962    | 101.3516643 | 1.920837302 | 9.17E-11    | 52.76431492 |
| PSRC1        | NM_032636    | 115.3319    | 17.61830498 | 1.03E-06    | 6.546140515 |
| MOB1B        | NM_173468    | 108.4220179 | 3.910347928 | 2.21E-09    | 27.72694909 |
| DROSHA       | NM_013235    | 125.1802357 | 5.707996681 | 7.67E-11    | 21.93067774 |
| ZCCHC17      | NM_001282571 | 177.8417822 | 6.321988696 | 3.25E-15    | 28.1306707  |
| TLE3         | NM_020908    | 171.8044036 | 7.572589642 | 9.74E-15    | 22.68766851 |
| SAR1A        | NM_020150    | 126.2132108 | 8.001160654 | 6.63E-10    | 15.77436277 |
| OGDH         | NM_001003941 | 250.520943  | 9.750106592 | 3.15E-21    | 25.69417479 |
| SAMD5        | NM_001030060 | 161.0835644 | 5.631158363 | 1.30E-14    | 28.60575995 |
| TBRG4        | NM_199122    | 125.3407072 | 15.95864364 | 6.94E-08    | 7.85409525  |
| NBAS         | NR_052013    | 112.3934465 | 2.811659584 | 2.23E-10    | 39.97405914 |
| OSGIN2       | NM_004337    | 127.2461858 | 11.02830432 | 8.09E-10    | 11.53814603 |
| CYHR1        | NM_032687    | 217.7165394 | 49.2975557  | 3.51E-08    | 4.416375949 |
| GALNT3       | NM_004482    | 74.58463932 | 2.090869325 | 3.06E-07    | 35.67159287 |
| PMS2         | NM_000535    | 248.4549929 | 7.025343978 | 2.36E-23    | 35.36552711 |
| MTDH         | NM_178812    | 143.1319    | 8.092178591 | 1.27E-11    | 17.68768428 |
| SSB          | NM_003142    | 192.6945215 | 5.020789098 | 5.55E-20    | 38.37932996 |
| ENOSF1       | NM_001126123 | 127.0857143 | 14.07222657 | 1.37E-08    | 9.030959927 |
| CCDC47       | NM_020198    | 183.7186893 | 11.26215862 | 2.49E-14    | 16.31291971 |
| GEM          | NM_181702    | 268.3121358 | 13.34483484 | 9.15E-23    | 20.10606643 |
| XIAP         | NM_001167    | 81.49452145 | 3.810791152 | 5.81E-07    | 21.38519751 |
| ZNF76        | NM_003427    | 129.1516643 | 7.589959155 | 1.27E-10    | 17.01612112 |
| ETNK1        | NM_018638    | 286.2638001 | 2.478794449 | 2.53E-31    | 115.48509   |
| PRDM5        | NM_001300823 | 54.72749646 | 2.333505295 | 8.12E-05    | 23.45291291 |
| INO80C       | NM_001098817 | 152.1077322 | 6.993316057 | 3.43E-13    | 21.75044442 |
| CARS         | NM_001014437 | 117.3978501 | 9.50192333  | 1.67E-08    | 12.35516705 |
| SRSF1        | NR_034041    | 238.7671287 | 27.2169023  | 4.88E-15    | 8.772751802 |
| ZC3H11A      | NM_014827    | 84.59344649 | 6.475709929 | 4.33E-07    | 13.06319267 |
| SMPDL3A      | NM_006714    | 79.74951438 | 8.578819075 | 5.38E-06    | 9.296094682 |
| RANBP3       | NM_003624    | 102.5451108 | 9.626861277 | 3.55E-07    | 10.65197761 |
| TMEM186      | NM_015421    | 80.62201792 | 18.05565501 | 0.000879157 | 4.465194858 |
| CCDC69       | NM_015621    | 126.3736822 | 6.26458028  | 2.41E-10    | 20.17272931 |
| MATN1-AS1    | NR_034182    | 201.6703536 | 15.76756456 | 1.37E-15    | 12.79020313 |
| RBBP8        | NM_203291    | 127.2461858 | 2.973194141 | 1.51E-12    | 42.7978059  |
| ATP2C1       | NM_001199183 | 81.49452145 | 3.348732185 | 1.12E-07    | 24.33593281 |
| PDLIM5       | NR_046186    | 267.1186893 | 15.84080564 | 7.20E-22    | 16.86269596 |

|           |              |             |             |             |             |
|-----------|--------------|-------------|-------------|-------------|-------------|
| SKP1      | NM_170679    | 253.298925  | 9.110016572 | 1.09E-22    | 27.80444174 |
| SCMH1     | NM_001172218 | 54.72749646 | 5.478780784 | 0.000455147 | 9.988991826 |
| TM2D3     | NM_025141    | 139.320943  | 3.721847412 | 1.35E-14    | 37.43327641 |
| GLTSCR2   | NM_015710    | 198.7319    | 15.92892858 | 1.41E-14    | 12.47616241 |
| HCCS      | NM_005333    | 147.9758322 | 4.524548968 | 5.14E-15    | 32.70510126 |
| CMTR2     | NM_018348    | 118.4308251 | 20.25849366 | 3.03E-06    | 5.845983766 |
| TPD52L2   | NR_045090    | 127.2461858 | 15.62162668 | 2.46E-08    | 8.145514443 |
| BIN1      | NM_139348    | 54.72749646 | 9.584197906 | 0.001589777 | 5.710180132 |
| DLST      | NM_001933    | 176.9692786 | 12.39544158 | 6.38E-14    | 14.27696444 |
| PSMA1     | NM_148976    | 159.8901179 | 4.376644772 | 2.73E-14    | 36.53257831 |
| RNF138P1  | NR_001575    | 47.97808581 | 6.302588926 | 0.001712655 | 7.612440915 |
| MTIF3     | NM_152912    | 135.1890429 | 10.48985649 | 4.28E-10    | 12.88759699 |
| EIF3D     | NM_003753    | 151.0747572 | 18.08401969 | 6.69E-10    | 8.354047375 |
| LINC00152 | NR_024205    | 70.61321075 | 8.217487865 | 5.27E-05    | 8.593041074 |
| CLASRP    | NM_007056    | 199.7648751 | 13.21062924 | 9.11E-16    | 15.12152611 |
| TMC4      | NM_001145303 | 178.8747572 | 26.86210566 | 3.51E-10    | 6.658999835 |
| AKR1E2    | NM_001271021 | 57.8264215  | 7.154389293 | 0.000684318 | 8.082649564 |
| BANK1     | NM_017935    | 160.0505893 | 1.555563403 | 1.49E-15    | 102.8891456 |
| SMG1P5    | NR_002453    | 207.8682037 | 4.431729054 | 7.86E-20    | 46.90453797 |
| CRB3      | NM_174881    | 97.54070721 | 2.157344162 | 2.03E-10    | 45.21332708 |
| MADD      | NM_003682    | 142.098925  | 8.993260479 | 1.04E-11    | 15.8006015  |
| CAPN1     | NM_001198868 | 50.75606789 | 9.010739738 | 0.002501911 | 5.632841406 |
| PSMC3IP   | NM_001256016 | 157.1121358 | 29.69771291 | 7.12E-08    | 5.290378296 |
| CCDC61    | NM_001267723 | 193.7274965 | 7.186848499 | 3.71E-18    | 26.95583419 |
| ZNF619    | NM_001145083 | 104.4505893 | 8.60442332  | 3.08E-08    | 12.13917371 |
| DHRS4L1   | NR_102689    | 222.5604715 | 11.18637919 | 1.22E-18    | 19.89566666 |
| PRPF3     | NM_004698    | 169.0264215 | 8.114080423 | 8.81E-15    | 20.83124799 |
| SECISBP2L | NM_014701    | 142.098925  | 3.810895414 | 3.66E-13    | 37.28754259 |
| SLC35A3   | NM_012243    | 277.2879679 | 2.957268996 | 9.39E-29    | 93.76487844 |
| TRMT10B   | NM_001286953 | 124.3077322 | 11.09855683 | 1.49E-09    | 11.20035101 |
| TMEM126B  | NM_001256547 | 146.0703536 | 3.562306322 | 3.13E-16    | 41.00443375 |
| LSM4      | NM_001252129 | 100.4791608 | 19.08361794 | 2.09E-05    | 5.265205011 |
| HEATR5B   | NM_019024    | 117.3978501 | 3.955787391 | 3.61E-10    | 29.67749236 |
| ZSCAN22   | NM_181846    | 300.9560679 | 5.566840414 | 3.52E-32    | 54.0622769  |
| PDK4      | NM_002612    | 42.81321075 | 4.632211232 | 0.002604518 | 9.242499663 |
| IDS       | NM_006123    | 203.5758322 | 6.126524621 | 5.48E-20    | 33.22859937 |
| MON1B     | NM_014940    | 120.3363036 | 10.59445849 | 3.82E-09    | 11.35841948 |
| PPCDC     | NR_125369    | 194.7604715 | 13.22163993 | 2.38E-15    | 14.73043227 |
| FAM46C    | NM_017709    | 272.1230929 | 9.444272166 | 2.73E-24    | 28.81355896 |
| C11orf49  | NR_103471    | 125.1802357 | 4.600750333 | 8.82E-11    | 27.20865656 |
| IKBIP     | NM_201612    | 60.052843   | 6.753932796 | 0.000426412 | 8.891536948 |
| ARHGAP29  | NM_004815    | 173.8703536 | 3.382084462 | 1.23E-17    | 51.4092287  |
| EPHB3     | NM_004443    | 192.6945215 | 9.115661707 | 1.05E-16    | 21.13884078 |
| CFL2      | NR_028131    | 143.2923715 | 17.62340772 | 7.81E-09    | 8.130798188 |
| PARP14    | NM_017554    | 64.73630363 | 5.426316075 | 3.23E-05    | 11.93006503 |
| IST1      | NM_001270979 | 192.6945215 | 10.20523262 | 6.72E-16    | 18.88193328 |
| ATE1      | NM_001288734 | 235.5077322 | 4.415827491 | 1.85E-21    | 53.33263871 |
| ZNF480    | NM_001297625 | 52.82201792 | 6.172225203 | 0.00062297  | 8.558018572 |
| SYK       | NM_001174168 | 56.63297501 | 5.458915357 | 0.000235701 | 10.37440065 |
| TTLL4     | NM_014640    | 185.7846393 | 6.95709899  | 2.29E-16    | 26.70432598 |
| ICE1      | NM_015325    | 74.58463932 | 3.904324482 | 6.78E-07    | 19.1030842  |
| CLPX      | NM_006660    | 129.3121358 | 7.704536277 | 1.23E-10    | 16.78389602 |
| UBA52     | NM_001033930 | 181.8132108 | 32.56150654 | 4.05E-09    | 5.583685463 |
| IBTK      | NM_015525    | 140.353918  | 3.485277134 | 8.74E-14    | 40.27051869 |
| SEC16A    | NM_014866    | 196.66595   | 14.15380131 | 3.19E-15    | 13.89492093 |
| RPS27L    | NM_015920    | 253.298925  | 6.321251013 | 6.44E-27    | 40.07101197 |
| CCDC9     | NM_015603    | 90.47035361 | 11.5915079  | 7.46E-06    | 7.804882196 |
| TCERG1    | NM_001040006 | 109.2945215 | 2.885063228 | 1.19E-10    | 37.88288603 |
| STIM1     | NM_001277962 | 101.3516643 | 5.252693874 | 2.67E-08    | 19.29517819 |
| TK1       | NM_003258    | 190.7890429 | 39.7663845  | 5.22E-09    | 4.797746773 |
| MYEOV     | NM_001300923 | 174.9033286 | 36.788926   | 1.02E-07    | 4.754238507 |
| TMEM9     | NM_001288565 | 59.73190005 | 12.86041386 | 0.003929496 | 4.644632801 |

|             |              |             |             |             |             |
|-------------|--------------|-------------|-------------|-------------|-------------|
| MRI1        | NM_001031727 | 57.66595002 | 9.389226459 | 0.001691235 | 6.141714685 |
| ETV4        | NM_001986    | 113.26595   | 18.3182628  | 1.34E-06    | 6.183225519 |
| MALL        | NM_005434    | 100.4791608 | 14.69560649 | 2.36E-06    | 6.837360595 |
| MGRN1       | NR_102267    | 195.7934465 | 8.958577425 | 5.46E-17    | 21.85541713 |
| CNOT7       | NM_013354    | 205.6417822 | 8.515750815 | 1.11E-18    | 24.14840296 |
| MIEF1       | NM_019008    | 99.44618576 | 13.24486993 | 1.40E-06    | 7.508279528 |
| GOLM1       | NM_177937    | 71.64618576 | 7.710496247 | 5.32E-05    | 9.292033024 |
| ATP5S       | NM_001003803 | 157.9846393 | 10.23709349 | 1.37E-12    | 15.4325678  |
| DYSF        | NM_001130982 | 79.5890429  | 6.812619389 | 2.09E-06    | 11.68259055 |
| SLC35A1     | NM_006416    | 265.3736822 | 7.10600224  | 5.46E-25    | 37.34500402 |
| ZDHHC4      | NM_018106    | 281.098925  | 13.33901683 | 1.94E-24    | 21.07343657 |
| C6orf203    | NM_001142470 | 196.66595   | 11.38057843 | 5.79E-16    | 17.28083957 |
| ADCK4       | NM_024876    | 179.0352287 | 13.19945303 | 5.22E-14    | 13.56383695 |
| KIRREL      | NM_001286349 | 61.6373786  | 8.317143128 | 0.000314097 | 7.410883478 |
| PPP1R3D     | NM_006242    | 120.1758322 | 6.176233453 | 8.03E-11    | 19.45778654 |
| TOM1L2      | NM_001288786 | 114.298925  | 6.300853574 | 1.02E-09    | 18.14022873 |
| PGF         | NM_002632    | 132.2505893 | 12.45837334 | 1.01E-09    | 10.61539784 |
| ATAD2B      | NR_125717    | 172.9978501 | 2.274923698 | 4.23E-17    | 76.04556153 |
| APOBEC3G    | NM_021822    | 45.75166431 | 5.429603183 | 0.001331861 | 8.426336652 |
| TM7SF2      | NR_102367    | 357.4285714 | 41.433139   | 8.78E-22    | 8.626635105 |
| LRRC8E      | NM_001268285 | 201.6703536 | 15.34030428 | 2.28E-15    | 13.14643764 |
| C1orf109    | NM_017850    | 58.85939651 | 10.23489803 | 0.000944446 | 5.750853239 |
| FYCO1       | NM_024513    | 89.4373786  | 7.089216478 | 1.49E-06    | 12.6159751  |
| IL17RD      | NM_017563    | 61.79785007 | 6.53627825  | 6.96E-05    | 9.454592921 |
| GUCD1       | NM_001284252 | 278.320943  | 20.72765183 | 1.14E-20    | 13.4275192  |
| SARNP       | NM_033082    | 90.63082508 | 8.382762337 | 7.87E-07    | 10.81157039 |
| CCDC83      | NM_173556    | 42.81321075 | 5.110756286 | 0.004164794 | 8.377079312 |
| SPP1        | NM_000582    | 28.83297501 | 0.58243637  | 0.002709696 | 49.50407716 |
| EXD2        | NR_034164    | 163.1495144 | 5.696339315 | 5.13E-15    | 28.64111588 |
| RAF1        | NM_002880    | 97.54070721 | 7.314045843 | 2.44E-07    | 13.33608092 |
| FAM104B     | NM_001166704 | 49.72309288 | 2.073542108 | 7.51E-05    | 23.97978449 |
| IL1RAP      | NM_001167929 | 138.1274965 | 3.126057026 | 3.28E-13    | 44.18585308 |
| SEC14L4     | NM_001161368 | 304.0549929 | 11.52590459 | 3.75E-27    | 26.3801414  |
| CWC27       | NM_001297645 | 82.68796794 | 2.563861676 | 3.53E-08    | 32.25133739 |
| TCAIM       | NM_001029840 | 195.953918  | 9.448046157 | 3.46E-17    | 20.74015248 |
| GTF2F1      | NM_002096    | 96.5077322  | 10.16964671 | 4.05E-07    | 9.489782188 |
| SMIM14      | NM_174921    | 221.5274965 | 6.606977034 | 1.57E-19    | 33.52932746 |
| RNF41       | NR_040053    | 128.1186893 | 9.371962914 | 4.14E-10    | 13.67042214 |
| RGS20       | NR_104579    | 87.53190005 | 6.890241893 | 1.48E-06    | 12.70374849 |
| KDM8        | NM_001145348 | 139.1604715 | 11.49347037 | 1.91E-10    | 12.10778529 |
| HELQ        | NM_001297757 | 174.9033286 | 6.855110244 | 4.00E-15    | 25.51429844 |
| ZNF317      | NM_001190791 | 132.2505893 | 6.443093731 | 2.20E-11    | 20.52594528 |
| IP6K2       | NM_001146178 | 155.0461858 | 13.82199372 | 8.31E-11    | 11.21735322 |
| TRPM2-AS    | NR_109964    | 108.4220179 | 4.60777908  | 4.49E-10    | 23.53021185 |
| NDUFV2-AS1  | NR_110772    | 98.41321075 | 9.400732802 | 4.28E-07    | 10.46867439 |
| UBR5        | NM_015902    | 132.4110608 | 6.697099806 | 2.53E-11    | 19.77140324 |
| TRAPPC5     | NM_174894    | 133.1230929 | 14.18154659 | 1.22E-08    | 9.387064525 |
| RNF32       | NM_001184996 | 205.6417822 | 12.11495996 | 2.73E-16    | 16.97420238 |
| ACY1        | NM_001198897 | 132.4110608 | 33.01232895 | 2.91E-05    | 4.010957877 |
| SERF1B      | NM_022978    | 329.7890429 | 31.53888178 | 6.82E-22    | 10.45658642 |
| ZSCAN16-AS1 | NR_103456    | 82.52749646 | 12.5545992  | 4.62E-05    | 6.573487145 |
| DHX15       | NM_001358    | 128.4396323 | 5.319359345 | 1.88E-11    | 24.14569574 |
| C9orf72     | NM_018325    | 165.9274965 | 2.431839664 | 9.80E-18    | 68.23126495 |
| TM9SF1      | NM_001014842 | 157.1121358 | 18.86143994 | 8.07E-10    | 8.32980601  |
| SBDSP1      | NR_024111    | 146.2308251 | 12.65291002 | 4.08E-11    | 11.55709041 |
| TPGS2       | NM_001271953 | 134.1560679 | 9.060396447 | 3.16E-10    | 14.80686509 |
| AMOT        | NM_133265    | 51.62857143 | 2.961220846 | 0.000125119 | 17.43489396 |
| STAT4       | NM_003151    | 96.5077322  | 3.365174895 | 3.96E-09    | 28.67837043 |
| HNRNPA1P10  | NR_002944    | 235.5077322 | 34.57404803 | 7.16E-13    | 6.811691011 |
| CYB561A3    | NM_001161454 | 166.9604715 | 26.68022682 | 6.09E-09    | 6.257835535 |
| NR4A1       | NM_002135    | 299.9230929 | 16.02280082 | 5.70E-25    | 18.71851846 |
| MMADHC      | NM_015702    | 131.2176143 | 7.470674345 | 1.80E-11    | 17.56436009 |

|               |              |             |             |             |             |
|---------------|--------------|-------------|-------------|-------------|-------------|
| ITM2C         | NM_001012514 | 144.1648751 | 10.47189039 | 5.07E-11    | 13.7668434  |
| SRSF10        | NM_001300936 | 184.9121358 | 30.67698031 | 5.91E-10    | 6.027716351 |
| CPEB2         | NM_001177383 | 109.6154644 | 1.050804911 | 1.66E-11    | 104.3157138 |
| MOV10         | NM_001286072 | 80.62201792 | 14.4101743  | 0.000109821 | 5.594798249 |
| 6-Sep         | NM_145799    | 64.57583215 | 4.890833403 | 3.55E-05    | 13.20344138 |
| UNG           | NM_080911    | 95.47475719 | 10.41187358 | 7.78E-07    | 9.169796047 |
| RBM5          | NM_005778    | 114.4593965 | 10.54588475 | 2.13E-08    | 10.85346552 |
| AHSA2         | NM_152392    | 172.8373786 | 21.23021405 | 6.41E-11    | 8.141103909 |
| IFI35         | NM_005533    | 99.44618576 | 15.44983711 | 8.70E-06    | 6.436714188 |
| HES6          | NM_018645    | 156.9516643 | 38.96055078 | 7.63E-06    | 4.028476528 |
| HARS          | NM_001289093 | 152.1077322 | 18.20814549 | 6.47E-10    | 8.353828913 |
| USH1G         | NM_173477    | 138.1274965 | 15.22728302 | 1.78E-09    | 9.07105334  |
| ZNF138        | NM_001160183 | 183.8791608 | 5.211372203 | 1.37E-17    | 35.28421184 |
| CXorf57       | NM_018015    | 54.72749646 | 1.247206175 | 4.20E-05    | 43.88007175 |
| 2-Sep         | NM_001008491 | 157.1121358 | 11.14063427 | 2.26E-12    | 14.10262036 |
| ZBBX          | NM_024687    | 35.03082508 | 0.79567622  | 0.000784739 | 44.02648237 |
| PSMB1         | NM_002793    | 179.9077322 | 11.04507945 | 1.48E-14    | 16.28849597 |
| ZNF26         | NM_019591    | 41.94070721 | 3.661922024 | 0.000708512 | 11.45319505 |
| LOC100287015  | NR_040040    | 241.3846393 | 11.92939966 | 7.77E-21    | 20.23443309 |
| ZNF230        | NM_006300    | 73.71213579 | 3.357168228 | 4.73E-07    | 21.95664047 |
| ANAPC15       | NM_001278491 | 129.3121358 | 26.35997826 | 8.35E-06    | 4.905623764 |
| RNF125        | NM_017831    | 61.79785007 | 5.19622785  | 6.11E-05    | 11.89282916 |
| PAQR3         | NM_001040202 | 108.4220179 | 5.017491843 | 4.59E-10    | 21.60880801 |
| FANCA         | NM_001286167 | 147.2638001 | 17.28184984 | 8.28E-10    | 8.521298439 |
| PGK1          | NM_000291    | 95.47475719 | 7.00246676  | 1.88E-07    | 13.63444633 |
| ATAD2         | NM_014109    | 245.6770108 | 9.277811684 | 1.25E-20    | 26.48006009 |
| MLLT11        | NM_006818    | 63.70332862 | 8.979146965 | 0.00046997  | 7.094585807 |
| NUDT22        | NM_001128613 | 216.6835644 | 36.52464125 | 7.03E-11    | 5.932530942 |
| LOC101928736  | NR_110941    | 204.7692786 | 15.51910216 | 3.93E-15    | 13.19466014 |
| CCT6A         | NM_001009186 | 148.1363036 | 16.11536034 | 5.26E-10    | 9.192242713 |
| YEATS2        | NM_018023    | 120.3363036 | 6.39499221  | 2.72E-10    | 18.81727134 |
| SH3YL1        | NM_015677    | 63.70332862 | 6.279077125 | 6.14E-05    | 10.14533304 |
| BRCC3         | NM_001018055 | 80.46154644 | 3.784602727 | 1.09E-06    | 21.26023581 |
| THADA         | NR_073394    | 201.6703536 | 4.96059154  | 4.45E-18    | 40.65449694 |
| TSSC1         | NM_003310    | 104.2901179 | 3.906991559 | 7.19E-10    | 26.69320276 |
| PGAP2         | NR_027017    | 204.6088072 | 14.86187652 | 1.53E-15    | 13.76736019 |
| APP           | NM_201414    | 217.5560679 | 4.814505136 | 1.61E-19    | 45.18762816 |
| DCAF8         | NR_028103    | 200.7978501 | 8.084040879 | 1.22E-17    | 24.83879697 |
| COASY         | NM_001042529 | 95.63522867 | 16.14719709 | 3.57E-05    | 5.922713903 |
| GABPB2        | NM_144618    | 99.44618576 | 6.274074784 | 1.46E-08    | 15.85033478 |
| SMTNL2        | NM_001114974 | 87.53190005 | 5.978844716 | 6.26E-07    | 14.64026985 |
| DOPEY1        | NM_001199942 | 137.2549929 | 3.711762694 | 2.80E-13    | 36.9783858  |
| RHPN1-AS1     | NR_026785    | 77.84403583 | 16.14402316 | 0.000973134 | 4.821848621 |
| ESCO2         | NM_001017420 | 178.0022537 | 3.335455617 | 3.54E-18    | 53.36669831 |
| HDAC8         | NM_001166419 | 119.3033286 | 3.367881483 | 1.52E-11    | 35.42385004 |
| PIK3R4        | NM_014602    | 160.9230929 | 3.345343435 | 4.26E-16    | 48.1036091  |
| TNIK          | NM_001161565 | 73.55166431 | 4.166277053 | 1.05E-06    | 17.65405022 |
| ABHD11        | NM_148912    | 218.5890429 | 26.18362032 | 3.84E-13    | 8.348312428 |
| PDLIM3        | NM_001257963 | 141.06595   | 4.117835147 | 2.75E-13    | 34.25730875 |
| RAD50         | NM_005732    | 237.4132108 | 5.65793099  | 3.46E-22    | 41.96113582 |
| WDR20         | NM_001242417 | 120.3363036 | 6.261015317 | 1.99E-10    | 19.21993439 |
| CIPC          | NM_033426    | 161.9560679 | 7.380169966 | 4.94E-14    | 21.94476125 |
| CKMT2-AS1     | NR_034122    | 164.0220179 | 3.87702152  | 3.47E-15    | 42.30619229 |
| CBWD5         | NM_001286836 | 208.9011787 | 18.87748037 | 3.93E-15    | 11.06615791 |
| TSC1          | NM_001162426 | 103.4176143 | 4.930051317 | 6.70E-09    | 20.97698537 |
| REV1          | NM_001037872 | 47.65714286 | 5.385910474 | 0.001360802 | 8.848484038 |
| STAMPB        | NM_006463    | 112.3934465 | 7.925420348 | 7.09E-09    | 14.18138617 |
| FAM114A1      | NM_138389    | 73.55166431 | 5.874283549 | 5.82E-06    | 12.52095914 |
| PRDX6         | NM_004905    | 195.7934465 | 8.41387292  | 7.83E-18    | 23.27031182 |
| PMS2P5        | NR_027777    | 201.6703536 | 3.165137222 | 1.54E-21    | 63.71614861 |
| ZNF670-ZNF695 | NR_037894    | 202.7033286 | 5.707704106 | 2.06E-18    | 35.51398686 |
| CDC42EP3      | NM_006449    | 91.6638001  | 12.35277831 | 1.18E-05    | 7.4205007   |

|           |              |             |             |             |             |
|-----------|--------------|-------------|-------------|-------------|-------------|
| ZBTB24    | NM_001164313 | 74.58463932 | 14.48888712 | 0.000781745 | 5.147713466 |
| C21orf33  | NM_198155    | 149.0088072 | 30.23573846 | 4.56E-07    | 4.928234426 |
| LCMT2     | NM_014793    | 88.72534654 | 5.156251054 | 5.96E-08    | 17.20733642 |
| WDR47     | NM_014969    | 102.5451108 | 5.475241634 | 9.16E-09    | 18.72887402 |
| SPOP      | NM_001007229 | 52.82201792 | 8.602136584 | 0.002785668 | 6.140569543 |
| PPIA      | NM_021130    | 216.5230929 | 31.58524715 | 4.73E-12    | 6.855197044 |
| TGOLN2    | NM_001206840 | 317.7142857 | 15.44825547 | 6.22E-27    | 20.56635368 |
| INPP5F    | NM_014937    | 46.78463932 | 6.223330188 | 0.002481858 | 7.517621259 |
| CHCHD2    | NM_016139    | 156.9516643 | 11.83530275 | 4.60E-12    | 13.26131386 |
| AP1S3     | NM_001039569 | 69.58023574 | 5.33907022  | 2.00E-05    | 13.03227582 |
| VWA8      | NM_015058    | 155.0461858 | 2.527483315 | 1.20E-14    | 61.34409862 |
| GIN51     | NM_021067    | 160.9230929 | 5.728928262 | 6.02E-15    | 28.08956327 |
| SON       | NM_032195    | 125.3407072 | 10.74826228 | 4.33E-09    | 11.66148574 |
| CDK18     | NM_212503    | 81.49452145 | 10.41057608 | 1.65E-05    | 7.82805109  |
| ZNF782    | NM_001001662 | 43.84618576 | 6.284457235 | 0.003975896 | 6.976924835 |
| KLHL21    | NM_014851    | 281.098925  | 23.32640445 | 7.95E-20    | 12.05067526 |
| LRRC16A   | NM_017640    | 100.4791608 | 3.887010475 | 3.11E-09    | 25.84998456 |
| CAST      | NM_173060    | 137.2549929 | 4.262365128 | 2.52E-12    | 32.20160376 |
| GOPC      | NM_020399    | 139.320943  | 4.019663353 | 4.24E-13    | 34.65985351 |
| AP2M1     | NM_001025205 | 209.6132108 | 22.31358153 | 5.66E-14    | 9.393974268 |
| PRMT2     | NM_001286676 | 172.9978501 | 5.019758509 | 4.02E-17    | 34.46338101 |
| COPS4     | NM_016129    | 132.2505893 | 3.251662001 | 2.06E-12    | 40.67169014 |
| ABII      | NM_001178124 | 160.9230929 | 4.375684616 | 2.21E-14    | 36.77666628 |
| PPP1R9A   | NM_017650    | 48.69011787 | 2.342854208 | 0.00030051  | 20.78239342 |
| CEP170    | NM_001042405 | 109.4549929 | 3.204970553 | 2.75E-10    | 34.15163762 |
| ANKRD46   | NM_001270377 | 220.8154644 | 7.298020809 | 4.70E-20    | 30.25689707 |
| ZFYVE19   | NM_001077268 | 156.9516643 | 15.84792512 | 8.04E-11    | 9.903609658 |
| CCNG1     | NM_004060    | 268.4726073 | 14.00798638 | 7.24E-23    | 19.16568163 |
| GPR63     | NM_001143957 | 227.5648751 | 2.442443448 | 1.23E-25    | 93.1709904  |
| TCEB3-AS1 | NR_038280    | 221.5274965 | 18.25671996 | 5.02E-16    | 12.134025   |
| LEMD3     | NM_014319    | 130.3451108 | 3.053603011 | 6.08E-13    | 42.68567666 |
| LRRC27    | NM_001143758 | 77.52309288 | 4.078259668 | 9.74E-07    | 19.00886633 |
| DUSP3     | NM_004090    | 182.8461858 | 15.1007843  | 2.01E-13    | 12.10839001 |
| CENPK     | NM_022145    | 174.7428571 | 4.607374513 | 1.29E-16    | 37.92677514 |
| HMGXB4    | NM_001003681 | 100.3186893 | 4.595286742 | 8.68E-09    | 21.830779   |
| FAM76A    | NM_001143913 | 136.2220179 | 7.609396801 | 1.80E-11    | 17.90181554 |
| INTS2     | NR_026641    | 275.3824894 | 8.176679796 | 7.54E-25    | 33.67901107 |
| KBTBD3    | NM_152433    | 151.9472607 | 5.143090482 | 1.21E-14    | 29.54396024 |
| IRAK4     | NM_016123    | 202.7033286 | 5.37342016  | 3.98E-19    | 37.72333497 |
| NFYA      | NM_002505    | 95.47475719 | 8.168200739 | 2.78E-07    | 11.68859094 |
| RTFDC1    | NM_001283035 | 82.68796794 | 7.338501679 | 4.34E-06    | 11.26769081 |
| PIK3R2    | NM_005027    | 100.3186893 | 11.49515478 | 1.34E-06    | 8.727041198 |
| ZBTB5     | NM_014872    | 101.3516643 | 10.4230887  | 4.35E-07    | 9.723764927 |
| LINC01024 | NR_102741    | 207.5472607 | 20.84297526 | 4.62E-14    | 9.957659986 |
| DNAJC19   | NR_046073    | 243.4505893 | 18.14060356 | 2.58E-18    | 13.42020338 |
| PLSCR4    | NM_020353    | 43.84618576 | 1.535488893 | 0.000693167 | 28.55519565 |
| EMBP1     | NR_003955    | 40.9077322  | 2.388234559 | 0.001500596 | 17.12885866 |
| TGM2      | NM_198951    | 112.3934465 | 8.234325263 | 5.24E-09    | 13.64938145 |
| SRP14-AS1 | NR_040061    | 90.47035361 | 11.6310444  | 8.31E-06    | 7.778351669 |
| RAP2B     | NM_002886    | 181.9736822 | 12.96903418 | 2.19E-14    | 14.03139815 |
| ARHGAP12  | NM_001270696 | 196.66595   | 3.199785634 | 1.68E-19    | 61.46222671 |
| RTN3      | NM_201429    | 164.1824894 | 4.99305795  | 8.15E-15    | 32.88215179 |
| LONRF3    | NR_110311    | 124.1472607 | 4.066506121 | 3.36E-11    | 30.52922018 |
| ANKMY2    | NM_020319    | 105.4835644 | 4.388765833 | 2.61E-09    | 24.03490374 |
| TMEM136   | NM_001198672 | 157.9846393 | 14.86539414 | 2.39E-11    | 10.62767915 |
| TMPPE     | NM_001136238 | 50.75606789 | 9.518529849 | 0.004218668 | 5.332343198 |
| TMEM231   | NR_074083    | 82.84843942 | 12.11947365 | 4.98E-05    | 6.835976696 |
| ZNF562    | NM_001300885 | 170.219868  | 6.031158182 | 1.14E-15    | 28.22341296 |
| BAIAP3    | NM_001199099 | 95.63522867 | 19.55273773 | 5.93E-05    | 4.891142611 |
| METTL14   | NM_020961    | 164.0220179 | 4.20480209  | 2.39E-16    | 39.00826113 |
| MED7      | NM_001100816 | 162.9890429 | 9.034061697 | 1.83E-14    | 18.04161277 |
| PLEKHG5   | NM_001042664 | 90.47035361 | 14.31091352 | 1.14E-05    | 6.321773482 |

|           |              |             |             |             |             |
|-----------|--------------|-------------|-------------|-------------|-------------|
| DDHD1     | NM_001160148 | 104.4505893 | 5.085832506 | 5.98E-09    | 20.53755982 |
| TP73      | NM_001204186 | 62.67035361 | 6.854049938 | 7.14E-05    | 9.143550772 |
| 10-Sep    | NM_178584    | 41.78023574 | 5.066995554 | 0.004202816 | 8.245563923 |
| C1orf115  | NM_024709    | 96.5077322  | 12.62220443 | 4.55E-06    | 7.645869841 |
| PSMD6     | NM_014814    | 107.2285714 | 11.13701893 | 1.40E-07    | 9.628121501 |
| KIN       | NM_012311    | 111.3604715 | 5.189305459 | 6.16E-10    | 21.45961003 |
| F10       | NM_000504    | 60.76487506 | 4.918136831 | 8.30E-05    | 12.35526321 |
| MXD1      | NM_002357    | 133.1230929 | 7.887468347 | 2.41E-11    | 16.87779741 |
| SSFA2     | NM_006751    | 41.78023574 | 6.057223023 | 0.003986452 | 6.897589139 |
| AK2       | NM_001625    | 122.4022537 | 9.601421901 | 2.45E-09    | 12.74834654 |
| RPE       | NM_001278285 | 104.4505893 | 6.045997531 | 8.05E-09    | 17.27598941 |
| R3HCC1    | NM_001136108 | 113.4264215 | 17.72602067 | 1.79E-06    | 6.398865464 |
| ZNF669    | NM_024804    | 171.9648751 | 16.28226494 | 4.80E-12    | 10.56148366 |
| DEDD2     | NR_073050    | 105.4835644 | 13.2495798  | 4.92E-07    | 7.961276204 |
| IQCD      | NM_138451    | 103.4176143 | 9.50745129  | 2.07E-07    | 10.87753291 |
| PLK2      | NM_006622    | 256.2373786 | 16.02383778 | 5.56E-21    | 15.99101177 |
| C18orf21  | NM_001201475 | 229.4703536 | 11.15762993 | 5.33E-20    | 20.56622734 |
| FAIM      | NM_018147    | 68.7077322  | 7.372772512 | 6.59E-05    | 9.319117346 |
| JARID2    | NM_004973    | 60.60440358 | 6.643294901 | 0.000143907 | 9.122642376 |
| C3orf52   | NM_024616    | 154.1736822 | 4.068511912 | 4.84E-15    | 37.89436668 |
| TP53I13   | NM_138349    | 102.3846393 | 16.75870805 | 6.47E-06    | 6.109339634 |
| FANCI     | NM_018193    | 134.3165394 | 8.45357816  | 7.69E-11    | 15.88872035 |
| DONSON    | NM_017613    | 142.9714286 | 15.98479173 | 1.53E-09    | 8.944215916 |
| DPYD      | NM_001160301 | 112.232975  | 1.477838435 | 1.04E-10    | 75.94400871 |
| NBPF11    | NM_183372    | 124.1472607 | 4.951101081 | 5.64E-11    | 25.07467707 |
| DPP8      | NM_017743    | 127.2461858 | 5.438936212 | 2.50E-11    | 23.39541793 |
| PRDM10    | NM_020228    | 54.72749646 | 5.631689248 | 0.000429874 | 9.717776329 |
| VRK2      | NM_001288836 | 174.1912966 | 3.247854646 | 3.55E-17    | 53.63272547 |
| SLC26A6   | NM_001281732 | 193.7274965 | 14.48334919 | 4.01E-15    | 13.37587694 |
| MRPL30    | NR_028356    | 164.0220179 | 8.830099816 | 8.04E-14    | 18.57532999 |
| KHDRBS1   | NR_073499    | 129.1516643 | 10.90098383 | 1.41E-09    | 11.84770717 |
| PVR       | NM_001135768 | 301.9890429 | 12.45585168 | 4.40E-26    | 24.24475264 |
| ARMCX3    | NM_177948    | 44.7186893  | 6.125885483 | 0.002632823 | 7.299955152 |
| AURKAIP1  | NM_001127229 | 115.4923715 | 19.20056416 | 1.09E-05    | 6.015050941 |
| USP33     | NM_015017    | 199.6044036 | 5.556002278 | 9.92E-19    | 35.92590384 |
| NIPA2     | NM_001008860 | 157.9846393 | 7.657067429 | 1.04E-13    | 20.63252554 |
| RPL13A    | NM_012423    | 283.1648751 | 67.0702934  | 4.48E-11    | 4.221911978 |
| MLXIPL    | NM_032952    | 283.1648751 | 14.46303675 | 5.12E-23    | 19.57852144 |
| ZNF765    | NM_001040185 | 84.59344649 | 6.670576856 | 9.31E-07    | 12.68157887 |
| PON2      | NM_000305    | 171.9648751 | 4.457988377 | 5.83E-17    | 38.5745454  |
| SKAP2     | NM_003930    | 138.1274965 | 1.547024808 | 2.14E-13    | 89.28589624 |
| TPD52     | NM_001025253 | 224.6264215 | 7.934495615 | 2.10E-19    | 28.31010721 |
| DPF1      | NM_001289978 | 77.68356436 | 6.036929327 | 4.68E-06    | 12.86805926 |
| TSG101    | NM_006292    | 217.7165394 | 4.184864485 | 1.80E-21    | 52.02475256 |
| BCL2L11   | NM_001204108 | 198.7319    | 9.333277293 | 1.45E-16    | 21.29283143 |
| TMEM25    | NM_001144037 | 57.8264215  | 10.79085911 | 0.002206661 | 5.358833892 |
| GTF2H2B   | NR_033417    | 196.8264215 | 3.470345833 | 3.64E-20    | 56.71665908 |
| SMUG1     | NM_001243788 | 184.7516643 | 18.67437311 | 1.13E-12    | 9.893326175 |
| ZNF248    | NM_001267597 | 222.720943  | 4.943712308 | 1.06E-21    | 45.05135596 |
| PDE8A     | NM_001243137 | 167.120943  | 5.135559662 | 9.82E-15    | 32.54191441 |
| CCDC77    | NM_001130148 | 111.3604715 | 8.024157245 | 9.29E-09    | 13.87815169 |
| SLC9A6    | NM_001177651 | 108.2615464 | 2.535695286 | 9.25E-11    | 42.69501429 |
| DTNB      | NM_183360    | 60.60440358 | 4.486393674 | 0.00014148  | 13.50848989 |
| SLC30A9   | NM_006345    | 169.0264215 | 4.052908936 | 2.16E-15    | 41.70496405 |
| MVD       | NM_002461    | 126.5341537 | 16.1823354  | 6.67E-08    | 7.819276425 |
| MRPL52    | NM_181307    | 116.3648751 | 12.79662243 | 5.33E-08    | 9.093405364 |
| HNRNPA2B1 | NM_031243    | 344.8022537 | 23.15630191 | 3.81E-26    | 14.8902124  |
| CANX      | NM_001024649 | 172.1253465 | 9.031569482 | 4.58E-14    | 19.05818771 |
| KRCC1     | NM_016618    | 179.9077322 | 6.764265649 | 2.44E-16    | 26.59678693 |
| NFYC      | NM_014223    | 140.1934465 | 7.314859094 | 2.09E-11    | 19.16557034 |
| MYO5A     | NM_000259    | 87.53190005 | 3.03501032  | 3.55E-08    | 28.84072567 |
| TRIQK     | NM_001191036 | 60.76487506 | 0.965040496 | 8.23E-07    | 62.96614009 |



|              |              |             |             |             |             |
|--------------|--------------|-------------|-------------|-------------|-------------|
| DFFA         | NM_004401    | 139.320943  | 12.49159388 | 4.76E-10    | 11.15317583 |
| C1QTNF9B-AS1 | NM_001014442 | 97.38023574 | 20.47519996 | 0.000125052 | 4.756009023 |
| BCCIP        | NM_016567    | 177.1297501 | 17.4337908  | 5.40E-12    | 10.1601397  |
| SCN8A        | NM_014191    | 93.40880717 | 4.372157185 | 8.85E-08    | 21.36446683 |
| CENPJ        | NR_047594    | 121.2088072 | 4.434760339 | 6.93E-11    | 27.33153494 |
| NDUFAF6      | NM_152416    | 248.2945215 | 6.421409695 | 1.11E-23    | 38.66666873 |
| SCD          | NM_005063    | 188.8835644 | 14.80432299 | 2.41E-14    | 12.75867627 |
| GPBP1        | NM_022913    | 111.2       | 5.480176944 | 1.52E-09    | 20.29131562 |
| LOC81691     | NM_001199053 | 242.4176143 | 7.82669296  | 3.40E-22    | 30.97318568 |
| RALA         | NM_005402    | 175.9363036 | 4.844949108 | 3.04E-16    | 36.313344   |
| ADSL         | NM_000026    | 276.4154644 | 10.32809764 | 5.55E-25    | 26.76344415 |
| SHOX2        | NM_006884    | 101.3516643 | 8.133952799 | 8.80E-08    | 12.46032118 |
| KRIT1        | NM_194455    | 150.2022537 | 4.185579804 | 3.36E-14    | 35.88565042 |
| STX17        | NM_017919    | 219.4615464 | 5.50859549  | 9.61E-21    | 39.83983701 |
| STIP1        | NM_001282652 | 227.7253465 | 17.16151216 | 2.69E-17    | 13.26953851 |
| BCDIN3D-AS1  | NR_027499    | 103.4176143 | 11.41903039 | 4.98E-07    | 9.056602073 |
| PHKB         | NM_001031835 | 188.8835644 | 3.02273722  | 3.50E-18    | 62.4875901  |
| PCID2        | NM_018386    | 204.6088072 | 5.695001555 | 2.66E-19    | 35.92778776 |
| MASTL        | NM_001172303 | 109.4549929 | 10.13166485 | 7.57E-08    | 10.80325836 |
| AGA          | NR_033655    | 214.7780858 | 9.060294269 | 1.35E-19    | 23.70542053 |
| RFWD3        | NM_018124    | 116.3648751 | 12.02137983 | 1.69E-08    | 9.679826833 |
| NDUFV1       | NM_001166102 | 92.53630363 | 10.59284498 | 1.62E-06    | 8.735736605 |
| HIGD1A       | NM_001099669 | 186.8176143 | 6.633434648 | 1.82E-17    | 28.1630293  |
| RNF146       | NM_001242852 | 223.753918  | 6.626338143 | 1.08E-20    | 33.76735584 |
| PLOD2        | NM_000935    | 144.1648751 | 2.711293205 | 3.75E-14    | 53.17199733 |
| C14orf169    | NM_024644    | 79.5890429  | 6.739857504 | 5.13E-06    | 11.808713   |
| ENC1         | NR_046318    | 71.80665724 | 9.001456255 | 0.000108022 | 7.977226707 |
| TRAPPC11     | NM_199053    | 142.098925  | 3.128150019 | 1.63E-14    | 45.42586646 |
| DIABLO       | NM_001278303 | 78.55606789 | 15.7275493  | 0.000494406 | 4.994806655 |
| FBXL4        | NR_103836    | 151.9472607 | 2.795761226 | 3.02E-15    | 54.34915519 |
| EMR2         | NM_001271052 | 157.9846393 | 5.368554309 | 1.25E-14    | 29.42778078 |
| COG6         | NM_001145079 | 171.9648751 | 3.2164478   | 9.61E-17    | 53.46422071 |
| NFE2L2       | NM_006164    | 171.9648751 | 11.93799331 | 5.32E-13    | 14.40483929 |
| YAP1         | NM_006106    | 78.55606789 | 3.652560125 | 4.34E-07    | 21.50712519 |
| MDM1         | NM_001205029 | 59.73190005 | 12.47535247 | 0.002658358 | 4.787992981 |
| RHBG         | NM_020407    | 222.5604715 | 5.016737014 | 1.98E-23    | 44.36359148 |
| TMEM230      | NM_001009924 | 155.0461858 | 8.177144814 | 1.81E-13    | 18.96091965 |
| VPS13B       | NM_152564    | 402.4682037 | 4.069317313 | 1.07E-38    | 98.90312618 |
| CSRNP2       | NM_030809    | 155.0461858 | 16.06150219 | 9.40E-11    | 9.653280495 |
| NFAT5        | NM_173215    | 195.632975  | 4.917084124 | 1.13E-17    | 39.78637951 |
| CHIC2        | NM_012110    | 149.1692786 | 3.066494842 | 3.66E-15    | 48.64488164 |
| PSMG3-AS1    | NR_027329    | 246.3890429 | 15.65343535 | 4.10E-19    | 15.74025365 |
| LINC00673    | NR_036488    | 490.8726073 | 11.78390338 | 4.72E-44    | 41.65619756 |
| EXOSC3       | NM_016042    | 216.6835644 | 13.81921627 | 6.38E-18    | 15.6798736  |
| ARL13B       | NM_001174150 | 217.5560679 | 2.255010732 | 5.65E-23    | 96.4767328  |
| TMEM168      | NM_001287497 | 126.2132108 | 2.795965344 | 2.11E-12    | 45.14119284 |
| RNF4         | NM_002938    | 184.7516643 | 11.65852009 | 3.30E-14    | 15.8469225  |
| TOMM40       | NM_006114    | 66.64178218 | 10.88942769 | 0.000370765 | 6.119860849 |
| ANKEF1       | NM_198798    | 202.7033286 | 4.765450123 | 3.61E-20    | 42.53602984 |
| CHMP1A       | NM_002768    | 174.0308251 | 11.26815447 | 2.28E-14    | 15.44448344 |
| LOC100507564 | NR_038953    | 91.50332862 | 14.73101671 | 1.93E-05    | 6.211609858 |
| CTDNEP1      | NM_015343    | 115.3319    | 10.5067775  | 1.40E-08    | 10.97690515 |
| TIMM17B      | NM_001167947 | 127.2461858 | 12.11767974 | 1.80E-09    | 10.5008705  |
| LTV1         | NM_032860    | 85.46595002 | 6.545687894 | 1.14E-06    | 13.05683244 |
| ACAD8        | NM_014384    | 152.2682037 | 8.865850871 | 2.40E-12    | 17.17468587 |
| TSPAN10      | NM_001290212 | 141.06595   | 13.55501125 | 5.26E-10    | 10.40692239 |
| INSIG1       | NM_005542    | 78.55606789 | 9.163108342 | 2.91E-05    | 8.573080767 |
| LOC102606465 | NR_109849    | 201.9912966 | 3.435300936 | 9.80E-20    | 58.79871963 |
| CAAP1        | NM_024828    | 157.1121358 | 4.339307897 | 1.13E-14    | 36.20672686 |
| ARID1B       | NM_017519    | 58.69892504 | 4.771095607 | 0.000144626 | 12.30302846 |
| ROR1         | NM_005012    | 84.59344649 | 4.286336272 | 6.22E-07    | 19.73560661 |
| TMEM143      | NM_018273    | 130.1846393 | 10.99548318 | 5.32E-10    | 11.83982888 |

|              |              |             |             |             |             |
|--------------|--------------|-------------|-------------|-------------|-------------|
| FOS          | NM_005252    | 317.0022537 | 35.94962814 | 1.16E-19    | 8.817956404 |
| LOC148709    | NR_002929    | 102.5451108 | 13.9975591  | 2.51E-06    | 7.325928045 |
| TMEM254      | NR_072985    | 52.82201792 | 3.498777158 | 0.000290837 | 15.09727986 |
| TRIM7        | NM_203295    | 72.67916077 | 13.0667772  | 0.000361225 | 5.56213362  |
| LOC101929231 | NR_110240    | 117.2373786 | 3.144288558 | 5.47E-11    | 37.28582044 |
| GLB1L        | NM_001286423 | 198.7319    | 14.92009998 | 3.55E-15    | 13.31974319 |
| UBE3D        | NM_198920    | 164.1824894 | 3.108735023 | 9.78E-16    | 52.81327877 |
| CPNE1        | NM_152925    | 213.5846393 | 13.00942053 | 5.20E-17    | 16.41769046 |
| C1orf27      | NM_001164246 | 93.56927864 | 2.691860699 | 2.43E-09    | 34.76007458 |
| UBE3B        | NM_001270449 | 308.0264215 | 12.07405643 | 1.32E-27    | 25.51142803 |
| RNF7         | NM_183237    | 131.3780858 | 8.501443248 | 1.07E-10    | 15.45362146 |
| TOMM5        | NM_001001790 | 185.7846393 | 8.022079579 | 3.46E-17    | 23.15916185 |
| CDK11B       | NM_033486    | 127.2461858 | 15.20629028 | 1.05E-08    | 8.367996624 |
| SCP2         | NM_001193617 | 106.3560679 | 4.004711205 | 5.49E-09    | 26.55773724 |
| PAPOLA       | NM_001252007 | 90.47035361 | 4.986032292 | 6.35E-08    | 18.14475886 |
| DUS3L        | NM_001161619 | 100.4791608 | 9.517737281 | 1.76E-07    | 10.5570429  |
| SGSM1        | NM_001098497 | 134.1560679 | 6.864589497 | 9.13E-11    | 19.54320327 |
| NOP16        | NM_001291307 | 130.3451108 | 11.75415715 | 8.52E-10    | 11.08927753 |
| NCEH1        | NM_001146276 | 160.9230929 | 5.829654613 | 2.04E-14    | 27.60422419 |
| RUFY2        | NM_001278225 | 127.4066572 | 5.134830792 | 6.09E-12    | 24.81224064 |
| SUV39H2      | NM_001193427 | 155.0461858 | 5.856972527 | 7.05E-14    | 26.47206984 |
| C2orf43      | NM_001282720 | 168.86595   | 3.891851545 | 3.42E-15    | 43.38961753 |
| GPN3         | NM_016301    | 135.3495144 | 6.475510521 | 3.93E-12    | 20.90175191 |
| GULP1        | NR_045562    | 149.0088072 | 2.424295934 | 3.63E-14    | 61.46477627 |
| PRR16        | NM_001300783 | 45.75166431 | 1.561691705 | 0.000513496 | 29.29622036 |
| USP19        | NM_001199162 | 117.3978501 | 18.92896716 | 1.86E-06    | 6.202020907 |
| TMEM106A     | NM_001291586 | 109.2945215 | 15.06668995 | 1.48E-06    | 7.25404995  |
| TRIM41       | NM_033549    | 156.0791608 | 34.56038715 | 2.98E-07    | 4.51612883  |
| CTTNBP2NL    | NM_018704    | 106.3560679 | 3.840630223 | 3.29E-09    | 27.69234779 |
| ZMYND8       | NM_001281781 | 78.55606789 | 7.570741183 | 1.84E-05    | 10.37627175 |
| CUL2         | NM_001198777 | 47.81761433 | 3.792408794 | 0.00026763  | 12.60877108 |
| ATG12        | NR_073603    | 113.26595   | 9.558552808 | 6.65E-09    | 11.84969653 |
| LINC00173    | NR_027345    | 119.1428571 | 14.60429061 | 2.05E-07    | 8.158072193 |
| ZNF7         | NM_001282797 | 160.0505893 | 24.10996972 | 1.89E-09    | 6.638357127 |
| TAF9B        | NM_015975    | 72.5186893  | 7.673476638 | 1.73E-05    | 9.450564942 |
| MKLN1        | NM_013255    | 197.698925  | 2.799143219 | 2.46E-19    | 70.62837075 |
| SLC22A5      | NM_003060    | 169.898925  | 10.36841531 | 7.26E-14    | 16.38619982 |
| TSPAN3       | NM_001168412 | 101.5121358 | 8.102850843 | 3.69E-08    | 12.52795316 |
| RNF111       | NM_001270528 | 205.8022537 | 4.991302655 | 6.47E-19    | 41.23217281 |
| ARAF         | NM_001256197 | 93.40880717 | 7.191340494 | 2.09E-07    | 12.98906751 |
| C21orf67     | NR_027129    | 225.498925  | 15.48051239 | 5.50E-18    | 14.56663187 |
| ZNF219       | NM_001102454 | 90.47035361 | 21.53415444 | 0.000262564 | 4.201249409 |
| MOB3B        | NM_024761    | 40.9077322  | 4.168505814 | 0.001914303 | 9.813524084 |
| TARSL2       | NM_152334    | 243.2901179 | 2.895655465 | 1.53E-25    | 84.01901429 |
| C14orf178    | NM_174943    | 82.68796794 | 8.023272079 | 4.44E-06    | 10.30601569 |
| DBT          | NM_001918    | 109.4549929 | 3.730867785 | 1.57E-09    | 29.33767671 |
| METTL9       | NM_016025    | 66.64178218 | 3.764829477 | 4.67E-06    | 17.70114226 |
| RABEP1       | NM_001291581 | 185.7846393 | 6.462455658 | 8.65E-17    | 28.74830392 |
| BMS1P6       | NR_024495    | 258.3033286 | 7.976076605 | 9.68E-25    | 32.38476026 |
| RPS10        | NM_001203245 | 171.0923715 | 18.86145504 | 3.01E-11    | 9.071005985 |
| FPGT         | NM_001199328 | 124.3077322 | 2.341680351 | 1.18E-14    | 53.08484233 |
| RHOD         | NM_014578    | 81.49452145 | 11.93232806 | 4.41E-05    | 6.829725183 |
| PFKP         | NM_002627    | 201.6703536 | 10.7810595  | 1.75E-16    | 18.70598652 |
| ACPI         | NM_007099    | 140.032975  | 9.446203715 | 1.16E-11    | 14.82425948 |
| ACTR6        | NR_048569    | 52.98248939 | 5.384608393 | 0.000294529 | 9.839617949 |
| IFT20        | NM_174887    | 66.96272513 | 10.37434465 | 0.000733664 | 6.454646285 |
| SMARCA5      | NM_003601    | 215.6505893 | 4.193407673 | 2.93E-21    | 51.4260969  |
| GPR89A       | NM_001097613 | 216.5230929 | 5.1435625   | 1.24E-20    | 42.09593893 |
| PPARD        | NM_001171818 | 141.2264215 | 9.301595509 | 2.57E-11    | 15.18303192 |
| CBR3-AS1     | NR_038892    | 193.7274965 | 11.47556856 | 1.31E-15    | 16.88173405 |
| CMC1         | NM_182523    | 237.4132108 | 3.067281298 | 1.49E-24    | 77.40183821 |
| NAA40        | NM_024771    | 92.53630363 | 9.457584204 | 1.87E-06    | 9.784348903 |

|              |              |             |             |             |             |
|--------------|--------------|-------------|-------------|-------------|-------------|
| ANGPTL1      | NM_004673    | 37.80880717 | 1.339776628 | 0.001431047 | 28.22023192 |
| SLC29A1      | NM_001078174 | 123.1142857 | 17.32981952 | 1.88E-07    | 7.104187416 |
| PIP4K2B      | NM_003559    | 149.0088072 | 14.70022787 | 4.59E-10    | 10.13649642 |
| GPN1         | NM_001145049 | 90.63082508 | 12.20441609 | 9.99E-06    | 7.426068104 |
| RBM27        | NM_018989    | 169.898925  | 3.112985119 | 7.29E-17    | 54.57749348 |
| RTBDN        | NM_031429    | 153.1407072 | 21.21410015 | 2.46E-09    | 7.21881702  |
| EOGT         | NM_001278689 | 164.8945215 | 5.809664373 | 1.27E-14    | 28.38279647 |
| RANBP6       | NM_001243202 | 98.41321075 | 1.39804073  | 4.62E-12    | 70.39366494 |
| RP9          | NM_203288    | 116.2044036 | 2.594764872 | 1.52E-12    | 44.7841748  |
| MAD1L1       | NM_001013836 | 170.9319    | 9.221457985 | 5.03E-14    | 18.53632043 |
| CENPO        | NM_001199803 | 91.50332862 | 7.548006209 | 4.91E-07    | 12.12284756 |
| PARP9        | NM_001146103 | 62.83082508 | 5.102233478 | 5.23E-05    | 12.31437671 |
| RBM4         | NM_001198843 | 180.9407072 | 19.46118967 | 3.51E-12    | 9.297515221 |
| SLC41A3      | NM_001008485 | 175.7758322 | 5.313901415 | 3.10E-16    | 33.0784895  |
| BTF3L4       | NM_001136497 | 89.59785007 | 5.214556258 | 1.36E-07    | 17.18225783 |
| C12orf4      | NM_020374    | 165.9274965 | 4.493208005 | 1.39E-15    | 36.92851439 |
| ARL4C        | NM_001282431 | 89.4373786  | 9.223127568 | 4.03E-06    | 9.697077042 |
| SLC30A6      | NM_001193513 | 157.1121358 | 4.829114968 | 1.78E-14    | 32.53435398 |
| CHTOP        | NM_001206612 | 142.098925  | 17.95016046 | 8.52E-09    | 7.916303887 |
| MSTO1        | NM_001256533 | 99.60665724 | 21.21828781 | 5.42E-05    | 4.694377706 |
| FGFR1OP      | NM_194429    | 142.098925  | 5.209270503 | 3.76E-13    | 27.27808528 |
| PCBP1-AS1    | NR_033872    | 237.5736822 | 7.699629738 | 1.48E-20    | 30.85520867 |
| LOC101927620 | NR_110062    | 166.9604715 | 9.316184226 | 4.06E-14    | 17.92155108 |
| BLMH         | NM_000386    | 156.0791608 | 5.228549915 | 1.16E-14    | 29.85132844 |
| ZNF146       | NM_001099639 | 62.83082508 | 9.843614738 | 0.000824059 | 6.382901684 |
| C10orf2      | NM_001163813 | 125.6616502 | 13.39721697 | 1.69E-08    | 9.379683145 |
| POLR3D       | NM_001722    | 151.0747572 | 18.20854523 | 9.26E-10    | 8.296915284 |
| CDK13        | NM_003718    | 122.2417822 | 6.883063918 | 1.18E-09    | 17.75979181 |
| ZBTB4        | NM_020899    | 72.67916077 | 15.23110473 | 0.001449374 | 4.771758981 |
| TRPV6        | NM_018646    | 83.4        | 8.296365881 | 8.72E-06    | 10.05259426 |
| SRA1         | NR_045587    | 246.3890429 | 28.97752666 | 3.38E-15    | 8.502763049 |
| C17orf62     | NM_001193654 | 175.2242716 | 22.93143922 | 9.06E-11    | 7.641224343 |
| LHPP         | NM_001167880 | 147.2638001 | 10.96897483 | 3.59E-11    | 13.42548437 |
| UTP23        | NM_032334    | 134.4770108 | 9.158172894 | 5.35E-11    | 14.6838253  |
| DDX19B       | NM_001014449 | 169.0264215 | 5.022580564 | 3.13E-16    | 33.65330219 |
| DUSP18       | NM_152511    | 139.320943  | 10.20106186 | 2.33E-11    | 13.65749418 |
| ENDOV        | NM_173627    | 152.2682037 | 23.08268993 | 1.44E-08    | 6.596640347 |
| CEP120       | NM_001166226 | 60.92534654 | 3.560606055 | 1.95E-05    | 17.11094841 |
| TMEM11       | NM_003876    | 127.4066572 | 14.58846106 | 1.42E-08    | 8.733385701 |
| BIRC3        | NM_182962    | 65.76927864 | 2.947786536 | 1.72E-06    | 22.31141158 |
| ANXA2        | NM_001002858 | 211.6791608 | 9.326105719 | 1.22E-17    | 22.69748673 |
| ANKHD1       | NM_017747    | 172.9978501 | 5.337097725 | 1.30E-15    | 32.41421817 |
| MRPL39       | NM_017446    | 203.7363036 | 3.529669788 | 4.36E-22    | 57.72106624 |
| INF2         | NM_032714    | 88.40440358 | 13.20988212 | 1.47E-05    | 6.692293146 |
| SPDYC        | NM_001008778 | 185.7846393 | 22.59636754 | 4.47E-11    | 8.221880749 |
| NOV          | NM_002514    | 32.09237152 | 0.428798311 | 0.000728885 | 74.8425791  |
| LARP4        | NM_052879    | 156.0791608 | 5.782404192 | 3.83E-14    | 26.99208765 |
| RFWD2        | NM_001286644 | 120.3363036 | 2.39743742  | 2.48E-11    | 50.19372043 |
| SNHG17       | NR_027241    | 278.1604715 | 21.46571238 | 5.40E-20    | 12.958362   |
| ZNF70        | NM_021916    | 77.52309288 | 10.92299302 | 9.23E-05    | 7.097239077 |
| DNAJA3       | NM_001135110 | 181.9736822 | 13.66570215 | 4.22E-14    | 13.31608726 |
| ADAT3        | NM_138422    | 120.3363036 | 13.57450744 | 2.51E-08    | 8.864874407 |
| PPT1         | NM_001142604 | 141.2264215 | 12.28105913 | 3.56E-10    | 11.49953111 |
| ILF3         | NM_012218    | 160.9230929 | 15.67734292 | 4.93E-11    | 10.26469177 |
| FBXO25       | NM_012173    | 54.72749646 | 4.565594921 | 0.000384672 | 11.98693651 |
| MST4         | NM_001042453 | 128.2791608 | 1.954106615 | 1.83E-13    | 65.64593752 |
| TNRC6B       | NM_015088    | 46.9451108  | 5.969629856 | 0.00253705  | 7.863990219 |
| ZNF408       | NM_024741    | 353.6176143 | 21.2488261  | 1.55E-28    | 16.64174824 |
| MELK         | NM_001256690 | 212.5516643 | 7.313354308 | 3.21E-18    | 29.06349882 |
| TRIM26       | NM_003449    | 86.49892504 | 5.093340866 | 2.21E-07    | 16.98274812 |
| PSMA3        | NM_002788    | 157.1121358 | 13.29570216 | 1.03E-11    | 11.81676108 |
| HEXA         | NM_000520    | 178.0022537 | 9.533286111 | 1.35E-14    | 18.67165756 |

|          |              |             |             |             |             |
|----------|--------------|-------------|-------------|-------------|-------------|
| NUAK1    | NM_014840    | 64.73630363 | 5.774633854 | 3.70E-05    | 11.21046031 |
| TTLL6    | NM_001130918 | 109.2945215 | 8.748191338 | 1.87E-08    | 12.49338489 |
| TTC39B   | NM_001168340 | 103.4176143 | 3.879296903 | 1.20E-09    | 26.65885518 |
| COQ9     | NM_020312    | 255.5253465 | 11.11602377 | 2.46E-22    | 22.98711767 |
| DNAJC8   | NM_014280    | 145.0373786 | 8.176580573 | 2.25E-12    | 17.73814583 |
| KIAA1244 | NM_020340    | 41.78023574 | 4.467751646 | 0.004447145 | 9.351512583 |
| IL21R    | NM_181079    | 51.7890429  | 7.260990539 | 0.002610693 | 7.132503841 |
| CCDC126  | NM_138771    | 126.2132108 | 2.935778339 | 8.82E-13    | 42.99139655 |
| MYO5C    | NM_018728    | 116.2044036 | 7.552204133 | 3.67E-09    | 15.38681973 |
| C2CD5    | NM_001286176 | 147.1033286 | 1.23576806  | 2.76E-15    | 119.037976  |
| ATP6V0D1 | NM_004691    | 138.2879679 | 10.24007076 | 1.92E-10    | 13.50459105 |
| P2RX4    | NM_001256796 | 119.4638001 | 12.32707022 | 2.71E-08    | 9.691175436 |
| TOMM70A  | NM_014820    | 141.2264215 | 6.52249795  | 7.63E-12    | 21.65219868 |
| MARK3    | NM_001128921 | 169.186893  | 6.091422899 | 4.67E-15    | 27.77460961 |
| CEP131   | NM_001009811 | 106.5165394 | 11.0080226  | 1.52E-07    | 9.676264594 |
| SSH2     | NM_001282130 | 104.2901179 | 4.306400547 | 7.40E-09    | 24.2174681  |
| C3orf58  | NM_173552    | 181.8132108 | 7.758247813 | 4.98E-16    | 23.43482899 |
| SPATA33  | NR_073515    | 184.9121358 | 18.75891268 | 8.58E-13    | 9.857294979 |
| CC2D1B   | NM_032449    | 150.2022537 | 17.48587143 | 5.02E-10    | 8.589920968 |
| SGPP1    | NM_030791    | 186.8176143 | 4.821608748 | 7.44E-18    | 38.74590911 |
| SNX2     | NM_003100    | 175.7758322 | 3.019346453 | 2.67E-18    | 58.21651635 |
| ZNF35    | NM_003420    | 172.8373786 | 12.57901664 | 2.75E-13    | 13.74013434 |
| ARF6     | NM_001663    | 152.1077322 | 14.83901704 | 8.79E-11    | 10.25052615 |
| BRMS1    | NM_015399    | 233.4417822 | 18.48976889 | 2.50E-17    | 12.62545701 |
| MRPS18A  | NM_018135    | 138.2879679 | 8.681999295 | 3.30E-11    | 15.92812476 |
| TCF12    | NM_207037    | 90.63082508 | 2.835281803 | 2.07E-08    | 31.9653676  |
| TESC     | NM_017899    | 54.72749646 | 5.715793814 | 0.000398909 | 9.574784928 |
| BTRC     | NM_003939    | 117.5583215 | 6.305113746 | 6.25E-10    | 18.64491685 |
| SLC12A2  | NR_046207    | 151.2352287 | 3.166798981 | 7.65E-15    | 47.75649783 |
| TXLNG    | NM_018360    | 122.2417822 | 4.115461179 | 5.36E-11    | 29.70305802 |
| WDR35    | NM_001006657 | 118.2703536 | 1.95468689  | 1.05E-11    | 60.50603511 |
| ZNF658B  | NR_003528    | 296.1121358 | 16.69141307 | 2.63E-23    | 17.7403875  |
| FAM122C  | NM_001170783 | 39.87475719 | 1.628399924 | 0.000605096 | 24.48707876 |
| GIPC1    | NM_202470    | 83.56047148 | 10.81884326 | 1.32E-05    | 7.72360496  |
| TOMM20   | NM_014765    | 194.6       | 8.777627395 | 3.62E-17    | 22.17000007 |
| GTPBP3   | NM_032620    | 146.2308251 | 20.34487844 | 1.03E-08    | 7.187598859 |
| ZNF304   | NM_020657    | 110.3274965 | 7.777649038 | 2.92E-09    | 14.18519863 |
| S1PR5    | NM_030760    | 61.79785007 | 7.689904495 | 0.00019718  | 8.036231154 |
| BNIP1    | NM_013980    | 96.34726073 | 8.483930694 | 5.14E-07    | 11.35644128 |
| ALG5     | NM_001142364 | 189.7560679 | 7.003618406 | 1.49E-16    | 27.0940044  |
| HN1L     | NM_144570    | 72.67916077 | 11.05544653 | 0.000159233 | 6.574059274 |
| KIAA1524 | NM_020890    | 105.4835644 | 2.763233824 | 1.01E-10    | 38.17395526 |
| MAPKAPK3 | NM_001243925 | 86.49892504 | 10.72748798 | 9.84E-06    | 8.063297314 |
| TYW5     | NM_001039693 | 347.7407072 | 7.468681704 | 1.84E-34    | 46.55985099 |
| PNPLA8   | NM_001256010 | 73.87260726 | 4.78197965  | 4.79E-06    | 15.44812247 |
| ZNF33A   | NM_001278176 | 100.3186893 | 4.342450716 | 1.08E-08    | 23.10186018 |
| COX5B    | NM_001862    | 162.8285714 | 30.6636881  | 1.43E-07    | 5.310143088 |
| RNF141   | NM_016422    | 233.4417822 | 3.420103162 | 3.08E-25    | 68.25577217 |
| ACBD5    | NR_073196    | 104.4505893 | 4.841340226 | 2.90E-09    | 21.5747261  |
| SMG1P1   | NR_027154    | 211.8396323 | 2.905466208 | 1.92E-22    | 72.91071969 |
| RPS6KB1  | NM_001272044 | 188.8835644 | 7.382362076 | 2.25E-16    | 25.58578981 |
| ZFYVE26  | NM_015346    | 108.2615464 | 7.366045717 | 1.95E-08    | 14.6973764  |
| NDUFC2   | NM_001204055 | 122.2417822 | 17.17166194 | 1.45E-07    | 7.118809036 |
| ISOC2    | NM_001136201 | 110.3274965 | 11.08462756 | 3.41E-08    | 9.953198322 |
| LMF1     | NM_022773    | 154.0132108 | 6.50072553  | 1.23E-13    | 23.69169565 |
| C2orf69  | NM_153689    | 165.0549929 | 5.394397435 | 5.48E-16    | 30.59748469 |
| PMPCB    | NM_004279    | 184.7516643 | 6.022025617 | 4.06E-18    | 30.67932222 |
| NCOA3    | NM_001174087 | 233.6022537 | 4.229213617 | 1.24E-21    | 55.23538767 |
| ZUFSP    | NM_145062    | 100.4791608 | 2.60067291  | 2.83E-10    | 38.63583167 |
| EPHX4    | NM_173567    | 77.52309288 | 3.358876955 | 1.74E-07    | 23.08006334 |
| CYP51A1  | NM_000786    | 140.1934465 | 6.774564004 | 2.78E-12    | 20.69409137 |
| WDR70    | NM_018034    | 132.2505893 | 3.02686783  | 2.40E-12    | 43.69222469 |

|               |              |             |             |             |             |
|---------------|--------------|-------------|-------------|-------------|-------------|
| MEF2BNB-MEF2B | NR_027307    | 102.5451108 | 14.99899939 | 1.54E-06    | 6.836796784 |
| GTF3C5        | NM_001286709 | 277.2879679 | 14.78048465 | 1.32E-22    | 18.76041107 |
| MRPL55        | NM_181441    | 124.3077322 | 16.87497648 | 1.97E-07    | 7.366394397 |
| FAM96A        | NM_001014812 | 71.64618576 | 7.30883374  | 3.29E-05    | 9.802683754 |
| REXO2         | NM_015523    | 137.0945215 | 8.520751075 | 9.25E-12    | 16.08948792 |
| STXBP5-AS1    | NR_034115    | 37.80880717 | 3.395006115 | 0.003574185 | 11.13659472 |
| POLD3         | NR_046409    | 63.15176804 | 5.109815641 | 5.93E-05    | 12.35891321 |
| CASP7         | NM_001267056 | 127.4066572 | 11.52282258 | 1.55E-09    | 11.05689655 |
| SERBP1        | NM_001018067 | 146.2308251 | 9.248880356 | 9.67E-12    | 15.81065161 |
| SPOCK3        | NM_001204356 | 56.63297501 | 1.668993413 | 4.52E-05    | 33.93241374 |
| ALCAM         | NM_001243281 | 102.5451108 | 2.526052826 | 1.13E-09    | 40.59499855 |
| FIP1L1        | NM_030917    | 171.9648751 | 3.660602261 | 6.59E-16    | 46.97720834 |
| FAM204A       | NM_022063    | 155.2066572 | 7.087823598 | 2.28E-13    | 21.89764673 |
| KPTN          | NR_111923    | 59.89237152 | 8.345002879 | 0.000835407 | 7.177034256 |
| LINC01315     | NR_120595    | 100.4791608 | 12.76111336 | 2.79E-06    | 7.873855358 |
| NADSYN1       | NM_018161    | 164.8945215 | 7.678868152 | 3.53E-14    | 21.47380554 |
| NPTN          | NM_001161364 | 51.62857143 | 6.057141182 | 0.000750573 | 8.523587263 |
| CLCN2         | NM_004366    | 142.9714286 | 13.19286453 | 4.70E-10    | 10.83702696 |
| FAM172A       | NR_028080    | 116.3648751 | 2.065391591 | 5.96E-11    | 56.34034513 |
| FLVCR1-AS1    | NR_027286    | 214.6176143 | 6.647584127 | 6.16E-19    | 32.28505428 |
| RNF19B        | NM_001300826 | 176.8088072 | 6.960933533 | 5.31E-16    | 25.40015737 |
| FAM111A       | NM_001142521 | 110.3274965 | 12.48590887 | 7.79E-08    | 8.836160636 |
| MAGEF1        | NM_022149    | 188.8835644 | 40.46402975 | 2.41E-07    | 4.667937562 |
| ZNF655        | NM_024061    | 157.9846393 | 18.42994866 | 2.82E-10    | 8.572169257 |
| RBKS          | NM_022128    | 92.53630363 | 5.109366974 | 1.42E-07    | 18.11110928 |
| TBC1D1        | NM_001253912 | 59.73190005 | 4.91590182  | 0.000140754 | 12.15075122 |
| LOC101929331  | NR_121587    | 39.87475719 | 1.61304702  | 0.00040635  | 24.7201456  |
| PIGG          | NM_001289055 | 172.8373786 | 9.503132578 | 2.41E-14    | 18.18741106 |
| DENND1B       | NM_001300858 | 71.48571429 | 1.673104544 | 1.53E-06    | 42.72638821 |
| ZNF195        | NR_040083    | 152.1077322 | 7.623088635 | 1.85E-13    | 19.95355682 |
| GPR56         | NM_001145770 | 75.77808581 | 8.603332655 | 1.48E-05    | 8.807992071 |
| TMEM147       | NM_032635    | 159.0176143 | 18.43937393 | 8.95E-10    | 8.623807669 |
| FIGNL1        | NM_001287494 | 108.4220179 | 3.387039963 | 1.39E-11    | 32.01084697 |
| ZFYVE28       | NM_001172656 | 85.46595002 | 7.832525036 | 3.19E-06    | 10.91167275 |
| PLA2G12A      | NM_030821    | 145.1978501 | 4.427661557 | 1.25E-14    | 32.79334886 |
| VDAC2         | NR_033675    | 149.0088072 | 16.77838397 | 1.31E-09    | 8.880998757 |
| CEP78         | NM_001098802 | 176.9692786 | 4.46848987  | 1.44E-17    | 39.60382227 |
| CAMK2D        | NM_172128    | 65.60880717 | 2.804109711 | 6.71E-06    | 23.39737526 |
| SSR1          | NR_120448    | 108.4220179 | 10.02457297 | 7.52E-08    | 10.81562459 |
| NOD1          | NM_006092    | 199.7648751 | 7.186770296 | 1.31E-17    | 27.7961959  |
| ZBED8         | NM_022090    | 284.0373786 | 8.242501556 | 4.11E-28    | 34.46009402 |
| SLCO5A1       | NM_030958    | 72.67916077 | 5.186449782 | 1.22E-05    | 14.01327764 |
| CDIPT         | NM_001286586 | 122.2417822 | 9.611113249 | 1.05E-09    | 12.71879532 |
| ACTR10        | NM_018477    | 179.9077322 | 4.37966099  | 1.08E-17    | 41.07800412 |
| HAUS2         | NM_001130447 | 225.498925  | 9.075432593 | 2.12E-20    | 24.84718196 |
| ANKFY1        | NM_001257999 | 118.2703536 | 10.45263152 | 2.21E-08    | 11.31488788 |
| GPATCH3       | NM_022078    | 115.4923715 | 12.18078365 | 1.15E-07    | 9.481522279 |
| EI24          | NM_004879    | 94.44178218 | 9.358485232 | 8.05E-07    | 10.09156715 |
| ITGA2         | NR_073103    | 172.9978501 | 5.063155467 | 8.95E-16    | 34.16799093 |
| NFATC3        | NM_173163    | 120.3363036 | 4.831522281 | 2.65E-10    | 24.90649874 |
| AP2S1         | NM_021575    | 108.4220179 | 22.73685126 | 3.03E-05    | 4.768559052 |
| LINC00339     | NR_023919    | 145.3583215 | 22.46724636 | 1.72E-08    | 6.46978803  |
| CPPED1        | NM_001099455 | 167.832975  | 4.878163062 | 4.56E-15    | 34.40495385 |
| SNAPC2        | NM_003083    | 146.0703536 | 35.94599551 | 8.75E-06    | 4.063605738 |
| NUP50         | NM_007172    | 67.67475719 | 9.498346516 | 0.000267441 | 7.124898747 |
| PDE4DIP       | NM_001198832 | 128.9210467 | 10.90428365 | 2.44E-09    | 11.82297259 |
| EIF1          | NM_005801    | 396.5912966 | 58.85351129 | 1.85E-20    | 6.738617422 |
| USP21         | NM_001014443 | 139.1604715 | 13.51525669 | 4.15E-10    | 10.29654668 |
| KRT8          | NM_001256293 | 129.4726073 | 17.34659363 | 3.87E-08    | 7.463863513 |
| GNAI3         | NM_006572    | 74.58463932 | 6.743722904 | 2.53E-05    | 11.0598612  |
| SCARB1        | NM_005505    | 180.7802357 | 8.746727737 | 3.55E-15    | 20.66832776 |
| ST6GAL1       | NM_173216    | 68.86820368 | 5.374294771 | 2.23E-05    | 12.81437037 |

|              |              |             |             |             |             |
|--------------|--------------|-------------|-------------|-------------|-------------|
| FGFR4        | NM_001291980 | 209.6132108 | 11.80860523 | 1.44E-17    | 17.75088647 |
| SLC22A18     | NM_002555    | 124.1472607 | 14.0650407  | 6.56E-08    | 8.82665492  |
| SDCBP        | NM_001007069 | 192.6945215 | 5.194995145 | 5.79E-18    | 37.09233908 |
| FRMD5        | NM_001286491 | 144.1648751 | 6.06852106  | 2.49E-12    | 23.75617941 |
| SPRED2       | NM_181784    | 116.3648751 | 8.122167031 | 4.01E-09    | 14.32682616 |
| CEBPA-AS1    | NR_026887    | 85.46595002 | 15.3206757  | 0.000156839 | 5.578471322 |
| MINOS1-NBL1  | NM_001204089 | 135.1890429 | 8.250739147 | 6.64E-11    | 16.38508266 |
| HJURP        | NM_001282962 | 203.7363036 | 17.42401998 | 7.66E-15    | 11.69284149 |
| TMEM175      | NM_032326    | 156.2396323 | 10.10128307 | 1.05E-12    | 15.4673056  |
| LOC100129361 | NM_001271592 | 223.5934465 | 14.05123764 | 3.51E-18    | 15.91272258 |
| TMEM217      | NR_104442    | 124.3077322 | 7.93737003  | 3.38E-10    | 15.66107309 |
| RSU1         | NM_152724    | 71.64618576 | 3.188967438 | 1.80E-06    | 22.46689161 |
| ZNF226       | NM_001146220 | 88.56487506 | 6.231510923 | 1.90E-07    | 14.21242394 |
| HTATIP2      | NM_001098520 | 141.06595   | 5.335044189 | 1.02E-12    | 26.44138362 |
| LRCH4        | NM_002319    | 197.698925  | 14.5821377  | 4.99E-15    | 13.55760925 |
| USP38        | NM_032557    | 155.9186893 | 3.882392842 | 3.84E-15    | 40.16046177 |
| ATXN1        | NM_000332    | 58.69892504 | 4.20949017  | 2.55E-05    | 13.9444262  |
| PHYKPL       | NR_103509    | 186.8176143 | 26.7141752  | 7.39E-11    | 6.99320166  |
| STEAP2       | NM_152999    | 124.3077322 | 2.642419415 | 1.32E-12    | 47.04314973 |
| CYFIP2       | NM_001291721 | 68.54726073 | 8.541728094 | 0.000103591 | 8.024987447 |
| EEF1E1       | NM_004280    | 146.0703536 | 6.32616052  | 6.03E-13    | 23.08989049 |
| C1orf85      | NM_144580    | 100.4791608 | 23.58342067 | 0.000187868 | 4.260584679 |
| FBXO16       | NM_001258211 | 106.5165394 | 6.516847197 | 4.85E-09    | 16.34479621 |
| DNM1         | NM_001005336 | 64.73630363 | 11.1858258  | 0.000578017 | 5.787351315 |
| NUDT2        | NM_001244390 | 152.1077322 | 11.71810075 | 8.46E-12    | 12.98057898 |
| VPS29        | NM_001282151 | 253.4593965 | 6.584382981 | 4.93E-26    | 38.494024   |
| VCL          | NM_014000    | 233.6022537 | 7.206727418 | 2.44E-20    | 32.41447055 |
| PRMT1        | NM_198318    | 124.3077322 | 15.18587328 | 6.15E-08    | 8.185748025 |
| SCRN2        | NM_001145023 | 107.5495144 | 23.72252022 | 4.95E-05    | 4.53364623  |
| RNF121       | NR_024147    | 65.60880717 | 6.567520758 | 3.72E-05    | 9.989889576 |
| PPP1R15B     | NM_032833    | 196.8264215 | 9.644716416 | 1.92E-17    | 20.40769402 |
| ZNF707       | NM_001288808 | 183.0066572 | 16.11815511 | 1.45E-13    | 11.35406975 |
| SMC6         | NM_001142286 | 191.6615464 | 3.304002049 | 3.37E-19    | 58.00890665 |
| SLC1A3       | NM_001166695 | 71.48571429 | 3.657641116 | 1.41E-06    | 19.54421225 |
| EML3         | NM_001300794 | 84.43297501 | 14.14867075 | 6.71E-05    | 5.967555291 |
| KANTR        | NR_110456    | 108.2615464 | 3.129379257 | 9.16E-11    | 34.59521443 |
| SYF2         | NM_207170    | 103.4176143 | 4.28370229  | 1.50E-09    | 24.14211057 |
| CACTIN       | NM_021231    | 162.9890429 | 10.19722124 | 5.27E-13    | 15.98367233 |
| PI4K2A       | NM_018425    | 47.81761433 | 9.368268376 | 0.004458424 | 5.104210556 |
| COP8         | NM_006710    | 110.3274965 | 11.20420846 | 7.71E-08    | 9.846969279 |
| PPAP2A       | NM_176895    | 163.8615464 | 4.098841337 | 1.00E-14    | 39.97752852 |
| RASSF6       | NM_001270392 | 71.64618576 | 3.112837514 | 9.60E-07    | 23.01635901 |
| N6AMT2       | NM_174928    | 241.3846393 | 5.7661763   | 2.40E-22    | 41.86216771 |
| SVIL-AS1     | NR_110925    | 188.0110608 | 7.709137043 | 2.59E-16    | 24.38808128 |
| SF3A1        | NM_001005409 | 192.8549929 | 15.67578397 | 3.08E-14    | 12.30273352 |
| CYCS         | NM_018947    | 91.50332862 | 22.24616601 | 0.000407369 | 4.113217918 |
| ELMO3        | NM_024712    | 198.8923715 | 16.02023542 | 4.62E-15    | 12.41507171 |
| GGA1         | NM_013365    | 85.46595002 | 13.63177769 | 3.50E-05    | 6.269611488 |
| METTL15      | NM_001113528 | 81.65499293 | 3.573020778 | 1.37E-07    | 22.85320965 |
| CKLF-CMTM1   | NM_001204099 | 123.2747572 | 10.38414676 | 2.80E-09    | 11.87143827 |
| TPM3         | NM_001278189 | 230.5033286 | 11.62556159 | 3.37E-19    | 19.82728549 |
| C1GALT1C1    | NM_152692    | 57.66595002 | 7.057189915 | 0.000634098 | 8.171233979 |
| CAPN10-AS1   | NR_103792    | 126.3736822 | 20.71132622 | 1.00E-06    | 6.101670212 |
| MED27        | NM_001253881 | 115.4923715 | 7.5244717   | 8.38E-09    | 15.34890104 |
| IFI27L1      | NM_145249    | 94.60225365 | 7.472581604 | 1.89E-07    | 12.65991577 |
| ELMO2        | NM_182764    | 138.1274965 | 10.02272075 | 1.78E-10    | 13.78143719 |
| RDX          | NM_001260494 | 110.3274965 | 2.930010887 | 6.40E-11    | 37.65429574 |
| EIF1AX       | NM_001412    | 127.2461858 | 5.157565275 | 1.21E-11    | 24.67175479 |
| USP25        | NM_013396    | 50.75606789 | 0.853188848 | 1.10E-05    | 59.48983982 |
| ZNF286A      | NM_001288649 | 125.3407072 | 7.099950959 | 9.22E-11    | 17.65374267 |
| UNC45A       | NM_001039675 | 194.7604715 | 28.15023874 | 4.99E-11    | 6.91860816  |
| TMEM177      | NM_001105199 | 193.7274965 | 29.89876042 | 1.82E-10    | 6.479449107 |

|              |              |             |             |             |             |
|--------------|--------------|-------------|-------------|-------------|-------------|
| FAM222B      | NM_001288637 | 175.7758322 | 7.665858866 | 5.84E-15    | 22.92969845 |
| INPP4B       | NM_001101669 | 59.73190005 | 2.478969887 | 2.56E-05    | 24.09545205 |
| ECHDC1       | NM_001105545 | 134.1560679 | 3.92851449  | 2.86E-12    | 34.14931222 |
| GARS         | NM_002047    | 133.2835644 | 7.279567792 | 3.60E-11    | 18.30926892 |
| PCLO         | NM_033026    | 178.0022537 | 1.966851553 | 5.39E-17    | 90.5011125  |
| CRLF3        | NR_073118    | 183.8791608 | 9.61077657  | 6.05E-15    | 19.13260177 |
| SLC44A2      | NM_020428    | 140.1934465 | 12.51938284 | 2.49E-10    | 11.19811162 |
| METTL4       | NM_022840    | 71.64618576 | 1.437308778 | 2.34E-07    | 49.84745578 |
| DKC1         | NM_001363    | 72.5186893  | 8.13000984  | 2.73E-05    | 8.919877186 |
| QDPR         | NM_000320    | 81.49452145 | 8.746334083 | 3.37E-06    | 9.317563298 |
| COMMD3-BMI1  | NM_001204062 | 173.8703536 | 10.16179911 | 2.44E-14    | 17.11019394 |
| HMGB1        | NM_002128    | 104.2901179 | 4.633014012 | 2.34E-10    | 22.5102099  |
| TMEM63C      | NM_020431    | 129.1516643 | 8.427588963 | 2.80E-10    | 15.32486514 |
| MRPL49       | NR_037568    | 156.0791608 | 22.92151507 | 3.50E-09    | 6.809286396 |
| HMOX2        | NM_001286267 | 188.8835644 | 9.253194757 | 9.71E-16    | 20.41279464 |
| SRP19        | NM_001204194 | 82.84843942 | 10.82519341 | 1.91E-05    | 7.653298769 |
| LAMTOR2      | NM_001145264 | 112.3934465 | 19.09701966 | 7.76E-06    | 5.885391987 |
| SERTAD2      | NM_014755    | 216.5230929 | 8.591625317 | 1.83E-19    | 25.20164519 |
| BCAT1        | NM_001178092 | 37.80880717 | 2.670293081 | 0.00337207  | 14.15904772 |
| TMEM51       | NM_001136216 | 74.58463932 | 8.619751592 | 2.99E-05    | 8.652759714 |
| PICK1        | NM_001039584 | 101.5121358 | 14.29401037 | 3.35E-06    | 7.101725348 |
| CBX3         | NM_016587    | 199.6044036 | 8.452022907 | 4.57E-18    | 23.61616926 |
| DIS3L2       | NM_001257281 | 186.9780858 | 6.164028886 | 2.16E-16    | 30.33374588 |
| AARSD1       | NM_001261434 | 132.0901179 | 10.09719824 | 6.66E-10    | 13.08185842 |
| NEK7         | NM_133494    | 71.64618576 | 3.835037159 | 1.76E-06    | 18.68200562 |
| SLC35B3      | NR_109914    | 197.698925  | 3.216967265 | 1.50E-21    | 61.45506273 |
| PBLD         | NM_001033083 | 131.2176143 | 7.693426023 | 9.33E-11    | 17.05581024 |
| GCOM1        | NM_001285900 | 92.37583215 | 6.102342721 | 1.56E-07    | 15.13776534 |
| CLDND1       | NM_019895    | 160.0505893 | 14.81530687 | 3.41E-11    | 10.80305597 |
| NDRG4        | NM_001242836 | 176.9692786 | 22.80128136 | 3.98E-11    | 7.761374278 |
| WDTC1        | NM_015023    | 53.69452145 | 5.262903074 | 0.000407369 | 10.20245304 |
| NUTM2B-AS1   | NR_120613    | 68.54726073 | 3.973550424 | 3.25E-06    | 17.25088483 |
| SETD4        | NM_017438    | 233.4417822 | 8.732226058 | 5.70E-21    | 26.73336451 |
| QTRTD1       | NM_024638    | 81.65499293 | 3.933411799 | 3.66E-07    | 20.75932984 |
| SPECC1       | NM_001033555 | 83.56047148 | 5.283911795 | 1.04E-06    | 15.81413065 |
| ZNF417       | NM_152475    | 121.2088072 | 7.329045348 | 4.99E-10    | 16.53814398 |
| FAM3A        | NM_001171134 | 99.44618576 | 8.70272993  | 9.90E-08    | 11.42701044 |
| ZNF2         | NM_001017396 | 134.1560679 | 10.22387316 | 1.20E-10    | 13.12184393 |
| EMX1         | NM_004097    | 58.69892504 | 12.30197576 | 0.003766103 | 4.771503876 |
| EEFSEC       | NM_021937    | 186.8176143 | 8.19833482  | 2.01E-15    | 22.78726332 |
| CARHSP1      | NM_001278260 | 274.1890429 | 25.34084771 | 1.25E-18    | 10.82004225 |
| HM13         | NM_178580    | 161.0835644 | 16.27737933 | 6.69E-11    | 9.896160866 |
| GMIP         | NM_001288999 | 232.7297501 | 10.39616431 | 6.90E-20    | 22.38611695 |
| CDK16        | NM_006201    | 70.61321075 | 10.30029409 | 0.000101541 | 6.85545579  |
| SLC33A1      | NM_004733    | 148.2967751 | 6.212609322 | 4.58E-13    | 23.87028822 |
| BCL7B        | NM_001707    | 93.40880717 | 10.93240679 | 1.29E-06    | 8.544212536 |
| CNOT1        | NR_049763    | 213.5846393 | 7.85550927  | 2.00E-18    | 27.18915248 |
| RQCD1        | NM_001271634 | 58.85939651 | 7.695353248 | 0.000426412 | 7.648693258 |
| C14orf2      | NM_004894    | 210.6461858 | 11.27588708 | 1.05E-17    | 18.68111877 |
| BAMBI        | NM_012342    | 241.3846393 | 10.46958038 | 1.20E-21    | 23.05580841 |
| LOC100507431 | NR_125383    | 57.66595002 | 4.924949667 | 0.000124673 | 11.708942   |
| TSPAN13      | NM_014399    | 169.898925  | 6.168167771 | 4.05E-15    | 27.54447209 |
| CRELD1       | NM_015513    | 124.4682037 | 13.32083201 | 1.32E-08    | 9.343876085 |
| ACADSB       | NM_001609    | 251.553918  | 9.591012601 | 1.28E-21    | 26.22808752 |
| DCP1A        | NM_001290206 | 211.6791608 | 6.864887973 | 1.22E-18    | 30.83504955 |
| TYSND1       | NM_001040273 | 125.3407072 | 24.21302716 | 2.51E-06    | 5.17658145  |
| OXSM         | NR_026937    | 191.8220179 | 13.68113832 | 9.63E-15    | 14.02091064 |
| CRB1         | NM_001257965 | 112.232975  | 2.374148857 | 1.83E-10    | 47.27293096 |
| DNM3         | NM_001278252 | 171.8044036 | 2.795038622 | 2.07E-16    | 61.46763132 |
| PLK4         | NM_001190801 | 89.59785007 | 4.591652021 | 4.84E-08    | 19.51320563 |
| STK16        | NR_026909    | 254.3319    | 35.62699682 | 2.25E-14    | 7.138740921 |
| PPWD1        | NM_001278929 | 130.1846393 | 6.393029792 | 2.44E-11    | 20.36352771 |

|              |              |             |             |             |             |
|--------------|--------------|-------------|-------------|-------------|-------------|
| CAGE1        | NM_205864    | 236.5407072 | 4.543423335 | 5.78E-23    | 52.06222044 |
| MED15        | NM_001293234 | 157.1121358 | 9.802382699 | 4.02E-12    | 16.02795367 |
| CXorf56      | NM_022101    | 63.70332862 | 1.95101508  | 2.89E-06    | 32.65137686 |
| SUPT5H       | NM_003169    | 166.9604715 | 16.81216094 | 1.29E-11    | 9.93093464  |
| METTTL22     | NM_024109    | 216.6835644 | 9.95166538  | 3.72E-18    | 21.7735983  |
| SPC25        | NM_020675    | 144.1648751 | 3.366005795 | 7.99E-15    | 42.82965742 |
| ZNF627       | NM_001290084 | 224.6264215 | 7.35159283  | 8.70E-21    | 30.55479631 |
| DCLK2        | NR_036614    | 69.58023574 | 4.602353515 | 2.24E-05    | 15.11840312 |
| OSBPL9       | NM_024586    | 41.78023574 | 4.197297238 | 0.001024082 | 9.954080773 |
| USB1         | NM_024598    | 221.6879679 | 8.477037148 | 2.57E-20    | 26.15158623 |
| SGOL1        | NM_001012409 | 108.4220179 | 4.579903255 | 2.41E-10    | 23.67342974 |
| SUMF1        | NM_001164675 | 147.9758322 | 3.495716014 | 1.77E-14    | 42.3306217  |
| C9orf16      | NM_024112    | 160.0505893 | 29.39502344 | 9.70E-08    | 5.444819245 |
| TWF1         | NR_073473    | 174.9033286 | 3.113686377 | 2.75E-19    | 56.17242954 |
| PPIL6        | NM_001111298 | 146.2308251 | 5.992460373 | 3.24E-13    | 24.40246843 |
| TMPO         | NM_001032283 | 169.898925  | 5.755574149 | 4.74E-15    | 29.51902289 |
| FAM136A      | NM_032822    | 157.1121358 | 18.622508   | 2.66E-10    | 8.43667973  |
| RABL2A       | NM_007082    | 143.1319    | 13.0078375  | 4.95E-10    | 11.00351231 |
| FOXN2        | NM_002158    | 69.58023574 | 2.666666616 | 2.09E-06    | 26.0925889  |
| IL6ST        | NM_001190981 | 185.0726073 | 3.256787175 | 5.73E-18    | 56.82674284 |
| SRRM1        | NM_005839    | 79.74951438 | 6.539831067 | 5.80E-06    | 12.19443034 |
| OSCAR        | NM_130771    | 60.76487506 | 5.725803427 | 0.000146554 | 10.61246266 |
| TEAD2        | NM_001256660 | 132.0901179 | 9.784043982 | 2.80E-10    | 13.5005646  |
| KIAA1191     | NR_109798    | 288.1692786 | 12.22968767 | 1.48E-25    | 23.56309387 |
| UXS1         | NM_025076    | 134.1560679 | 7.022719976 | 8.38E-11    | 19.10314926 |
| SLC2A8       | NM_014580    | 106.3560679 | 11.43260529 | 2.07E-07    | 9.302872371 |
| IFNLR1       | NM_170743    | 90.47035361 | 7.208884202 | 5.26E-07    | 12.54984143 |
| MKNK1        | NM_001135553 | 216.6835644 | 10.28288044 | 3.46E-18    | 21.07226332 |
| PSTPIP2      | NM_024430    | 93.40880717 | 5.155629174 | 6.91E-08    | 18.11782889 |
| RFC2         | NM_181471    | 131.2176143 | 13.14584674 | 2.32E-09    | 9.981678394 |
| ACSF2        | NM_001288971 | 219.4615464 | 13.02910896 | 2.23E-17    | 16.8439413  |
| UQCR11       | NM_006830    | 100.4791608 | 12.76079451 | 2.24E-06    | 7.874052095 |
| EEF1D        | NM_001130057 | 176.2572466 | 29.502143   | 1.04E-09    | 5.974387913 |
| PTGR1        | NM_001146109 | 79.5890429  | 10.34654134 | 3.57E-05    | 7.692333145 |
| TK2          | NM_001272050 | 94.60225365 | 7.423534115 | 3.33E-07    | 12.74356017 |
| NEK4         | NM_001193533 | 123.2747572 | 5.35225545  | 7.68E-11    | 23.03230074 |
| RPUSD4       | NM_001144827 | 144.1648751 | 10.0867382  | 1.43E-11    | 14.29251679 |
| TOR1B        | NM_014506    | 252.26595   | 18.11371045 | 4.23E-19    | 13.92679599 |
| GNG5         | NM_005274    | 176.9692786 | 12.72743406 | 8.00E-14    | 13.90455278 |
| PYGB         | NM_002862    | 341.7033286 | 9.931980838 | 6.51E-31    | 34.40434836 |
| CLUL1        | NM_001289036 | 41.94070721 | 4.804532217 | 0.004033634 | 8.729404928 |
| LOC100289495 | NR_040022    | 123.4352287 | 7.617562565 | 1.39E-10    | 16.20403214 |
| CCNJ         | NM_019084    | 89.59785007 | 7.399316863 | 5.62E-07    | 12.10893542 |
| UBE3C        | NM_014671    | 130.1846393 | 7.847538024 | 1.87E-10    | 16.58923333 |
| SNPH         | NM_014723    | 98.41321075 | 9.75081214  | 1.01E-06    | 10.09282195 |
| CATIP-AS1    | NR_110573    | 202.7033286 | 46.93871671 | 4.83E-07    | 4.318467628 |
| MEPCE        | NM_001194991 | 286.1033286 | 64.67759786 | 1.49E-11    | 4.423530528 |
| ITPA         | NM_033453    | 88.56487506 | 11.54233898 | 1.28E-05    | 7.673044015 |
| TSPYL4       | NM_021648    | 116.3648751 | 26.10306336 | 3.23E-05    | 4.457901107 |
| CPB2-AS1     | NR_046227    | 45.91213579 | 3.250415067 | 0.000434896 | 14.12500707 |
| STX6         | NM_001286210 | 114.298925  | 7.525987984 | 4.53E-09    | 15.18723193 |
| RSRC1        | NM_016625    | 180.7802357 | 2.189005227 | 3.28E-17    | 82.58556605 |
| CCDC7        | NM_145023    | 145.1978501 | 1.900108824 | 1.78E-14    | 76.41554435 |
| SNX17        | NM_001267059 | 82.68796794 | 19.87947109 | 0.000761404 | 4.159465188 |
| P4HA3        | NM_001288748 | 50.75606789 | 5.183267895 | 0.000670396 | 9.792291065 |
| SEN8         | NM_145204    | 120.3363036 | 2.908154087 | 5.64E-12    | 41.37892974 |
| C15orf40     | NM_001160113 | 167.9934465 | 8.593600027 | 4.51E-15    | 19.54866947 |
| PQLC2        | NM_017765    | 169.898925  | 10.79911423 | 1.80E-13    | 15.73267228 |
| SEC13        | NM_001278946 | 135.1890429 | 20.97918676 | 1.46E-07    | 6.443960123 |
| SUCO         | NM_014283    | 216.5230929 | 2.312903501 | 7.71E-23    | 93.6152731  |
| PRPF38A      | NM_032864    | 95.63522867 | 11.12536012 | 3.50E-06    | 8.596146788 |
| ADAM15       | NR_048577    | 154.0132108 | 15.04576306 | 1.09E-10    | 10.2363177  |



|              |              |             |             |             |             |
|--------------|--------------|-------------|-------------|-------------|-------------|
| C2CD3        | NM_001286577 | 102.3846393 | 5.604884919 | 1.31E-08    | 18.26703684 |
| ZNF629       | NM_001080417 | 89.59785007 | 19.75133909 | 0.000314729 | 4.536292434 |
| SLC38A3      | NM_006841    | 143.1319    | 9.854088073 | 9.69E-12    | 14.52512896 |
| RAB5B        | NM_001252036 | 102.3846393 | 12.68183188 | 9.95E-07    | 8.073332013 |
| LMCD1        | NM_001278234 | 81.49452145 | 5.516384521 | 8.09E-07    | 14.77317637 |
| TANGO2       | NM_001283148 | 149.0088072 | 9.224730796 | 1.45E-11    | 16.15318761 |
| BCO2         | NM_001256398 | 35.90332862 | 1.417115632 | 0.002273209 | 25.33549684 |
| RPL17        | NM_001199345 | 206.6747572 | 22.20343953 | 1.42E-13    | 9.308231588 |
| LOC654342    | NR_027238    | 108.4220179 | 9.393355339 | 5.26E-08    | 11.54241632 |
| AVPI1        | NM_021732    | 181.9736822 | 16.02446447 | 4.75E-13    | 11.3559915  |
| PEX1         | NM_001282677 | 189.7560679 | 4.656888294 | 2.67E-18    | 40.74739524 |
| MAP3K11      | NM_002419    | 146.2308251 | 15.40227567 | 3.63E-10    | 9.494105173 |
| PXMP4        | NM_183397    | 114.4593965 | 4.736597159 | 5.53E-11    | 24.16489996 |
| SNX14        | NR_123729    | 165.9274965 | 4.034667159 | 3.60E-15    | 41.1254485  |
| UXT          | NM_004182    | 78.55606789 | 3.232785017 | 6.82E-08    | 24.29981192 |
| PPP1R8       | NM_014110    | 176.9692786 | 11.74083859 | 5.03E-14    | 15.07296751 |
| NTMT1        | NM_001286798 | 261.5627251 | 19.50359701 | 1.35E-19    | 13.41099926 |
| PHOSPHO1     | NM_178500    | 187.8505893 | 16.90350628 | 2.12E-13    | 11.11311383 |
| PDCD10       | NM_145859    | 180.9407072 | 3.819223993 | 2.40E-17    | 47.37630146 |
| GNG10        | NM_001017998 | 65.76927864 | 8.548727649 | 0.000240453 | 7.693458178 |
| LOC102724691 | NR_110603    | 91.34285714 | 5.11393511  | 1.38E-07    | 17.86155967 |
| ITGA3        | NM_002204    | 172.1253465 | 24.1138104  | 4.18E-10    | 7.138040139 |
| NOLC1        | NM_001284389 | 88.72534654 | 19.10519205 | 0.000143911 | 4.644043688 |
| ZNF44        | NM_016264    | 59.89237152 | 5.407864689 | 8.04E-05    | 11.07504995 |
| PACRGL       | NM_001258346 | 150.0417822 | 4.726656767 | 1.10E-14    | 31.74374395 |
| DHX33        | NM_020162    | 94.44178218 | 8.651611696 | 2.81E-07    | 10.91609119 |
| PRR14        | NM_024031    | 113.4264215 | 16.67721336 | 8.04E-07    | 6.801281428 |
| NEDD1        | NM_152905    | 154.1736822 | 3.233362099 | 7.81E-15    | 47.68215792 |
| FAM72C       | NM_001287385 | 176.4177181 | 21.27122892 | 5.13E-11    | 8.293724764 |
| FAM109A      | NM_144671    | 79.5890429  | 14.89194711 | 0.000182753 | 5.344434968 |
| SLC9A5       | NM_004594    | 65.76927864 | 15.55530128 | 0.003825337 | 4.228094169 |
| HIP1         | NM_001243198 | 67.67475719 | 6.700122598 | 2.36E-05    | 10.10052521 |
| LINC00620    | NR_027103    | 59.73190005 | 6.079898736 | 0.000130918 | 9.824489295 |
| POLR3H       | NM_001282885 | 75.93855729 | 17.70209168 | 0.001281559 | 4.289807027 |
| MAFB         | NM_005461    | 124.3077322 | 9.739065789 | 1.76E-09    | 12.76382508 |
| TRMT10C      | NM_017819    | 175.9363036 | 9.676812693 | 3.68E-15    | 18.18122446 |
| MED25        | NM_030973    | 241.3846393 | 9.914172587 | 3.84E-21    | 24.34743164 |
| IQCG         | NM_032263    | 56.95391796 | 10.50775391 | 0.002873238 | 5.420180037 |
| LIMCH1       | NM_001289122 | 93.40880717 | 3.764420928 | 1.12E-08    | 24.81359257 |
| STARD3NL     | NM_032016    | 129.3121358 | 3.666894307 | 9.49E-12    | 35.26475676 |
| METTL13      | NM_014955    | 126.3736822 | 7.036880954 | 4.82E-11    | 17.9587637  |
| SF3B6        | NM_016047    | 156.0791608 | 11.03058357 | 1.98E-12    | 14.14967393 |
| TGFBR3       | NM_001195683 | 75.61761433 | 5.032299182 | 6.81E-06    | 15.02645443 |
| ANAPC10      | NM_001256710 | 141.2264215 | 4.16699541  | 1.97E-12    | 33.89166716 |
| POFUT2       | NR_004858    | 113.26595   | 3.1086486   | 4.14E-11    | 36.43575219 |
| PRKAR1A      | NM_212472    | 220.8154644 | 6.772055669 | 2.11E-20    | 32.60685901 |
| APIP         | NM_015957    | 147.1033286 | 7.385805605 | 2.03E-12    | 19.91703228 |
| CBX5         | NM_012117    | 159.0176143 | 11.49838413 | 1.63E-12    | 13.82956183 |
| PTER         | NM_030664    | 179.7472607 | 5.478375639 | 1.63E-16    | 32.81032054 |
| NDUFB8       | NM_001284368 | 174.0308251 | 22.91095548 | 1.36E-10    | 7.595965398 |
| APOBEC3H     | NM_001166003 | 56.63297501 | 5.232170123 | 0.000216973 | 10.82399343 |
| LOC100289561 | NM_001242713 | 130.3451108 | 6.676060546 | 1.09E-11    | 19.52425535 |
| PSMD8        | NM_002812    | 99.44618576 | 18.93593888 | 3.81E-05    | 5.251716664 |
| KIF3C        | NM_002254    | 65.60880717 | 6.349241923 | 3.51E-05    | 10.33332923 |
| ZNF771       | NM_016643    | 188.7230929 | 20.15994514 | 1.66E-12    | 9.361290003 |
| FAM86B2      | NM_001137610 | 59.73190005 | 9.302718563 | 0.000993354 | 6.420908    |
| DCLRE1B      | NM_022836    | 119.4638001 | 6.99004111  | 2.20E-10    | 17.09057189 |
| LOC101928103 | NR_110292    | 99.44618576 | 2.907152292 | 2.13E-09    | 34.20742217 |
| GPR98        | NR_003149    | 71.80665724 | 1.838808562 | 1.92E-06    | 39.05064328 |
| LRSAM1       | NM_001005373 | 121.3692786 | 10.57293863 | 9.21E-09    | 11.47923797 |
| PDXDC1       | NM_001285448 | 110.8089109 | 13.82890931 | 2.96E-07    | 8.012845295 |
| CCT3         | NM_001008800 | 143.2923715 | 13.09408148 | 2.54E-10    | 10.9432931  |

|              |              |             |             |             |             |
|--------------|--------------|-------------|-------------|-------------|-------------|
| STX4         | NM_001272095 | 76.65058935 | 14.87445133 | 0.000262638 | 5.153170874 |
| CLN3         | NM_001286105 | 70.61321075 | 8.771874188 | 0.000110424 | 8.049957083 |
| HMGA2        | NM_001300918 | 74.58463932 | 5.14070235  | 6.35E-06    | 14.5086477  |
| DUT          | NM_001025248 | 232.4088072 | 11.1127668  | 3.70E-20    | 20.91367625 |
| MBD1         | NM_001204141 | 75.77808581 | 17.22433016 | 0.001182741 | 4.399479404 |
| DYNC1I2      | NM_001271787 | 98.57368223 | 2.583899691 | 8.46E-10    | 38.14919077 |
| C11orf80     | NM_024650    | 84.59344649 | 8.094841258 | 2.99E-06    | 10.45029097 |
| TOR2A        | NM_001252018 | 159.8901179 | 16.08274794 | 4.32E-11    | 9.941716336 |
| BRE          | NM_199194    | 135.0285714 | 3.898184843 | 1.46E-12    | 34.6388324  |
| GEMIN7       | NM_001007269 | 179.0352287 | 14.62513779 | 3.08E-13    | 12.2416097  |
| MPP2         | NM_001278376 | 83.56047148 | 6.745296561 | 2.76E-06    | 12.38796111 |
| MORF4L1      | NM_001265603 | 69.58023574 | 7.512462635 | 6.73E-05    | 9.261974285 |
| ANKRD49      | NM_017704    | 79.5890429  | 5.612452306 | 1.85E-06    | 14.1807963  |
| ACACA        | NM_198834    | 121.3692786 | 5.942028762 | 3.68E-10    | 20.4255623  |
| ZBTB48       | NM_005341    | 179.9077322 | 26.9327829  | 1.82E-10    | 6.679879048 |
| SEC11C       | NM_033280    | 133.1230929 | 5.386257963 | 3.93E-12    | 24.71532069 |
| CES3         | NM_001185177 | 78.55606789 | 6.799094227 | 5.79E-06    | 11.55390193 |
| LINC00441    | NR_046414    | 187.8505893 | 9.89882233  | 5.08E-16    | 18.97706445 |
| STMN3        | NM_015894    | 134.1560679 | 18.74970375 | 6.40E-08    | 7.155103339 |
| CTSH         | NM_004390    | 88.56487506 | 18.55577612 | 0.000190897 | 4.772900604 |
| ZKSCAN8      | NM_001278122 | 139.1604715 | 3.034085248 | 6.63E-15    | 45.86570914 |
| MYADM        | NM_001290191 | 182.8461858 | 17.13881021 | 3.66E-13    | 10.66854604 |
| THEMIS2      | NM_001105556 | 223.5934465 | 17.27994271 | 1.94E-16    | 12.93947846 |
| VDAC3        | NM_005662    | 102.5451108 | 8.259724748 | 8.45E-08    | 12.41507604 |
| TSFM         | NM_001172695 | 178.8747572 | 5.59898471  | 5.81E-18    | 31.94771311 |
| MORN1        | NM_001301060 | 69.74070721 | 11.45486501 | 0.000316931 | 6.088304588 |
| AMBRA1       | NM_001300731 | 148.1363036 | 6.323107774 | 6.01E-13    | 23.42776826 |
| NUMB         | NM_001005744 | 123.4352287 | 3.459702128 | 1.29E-11    | 35.6779931  |
| LOC100128164 | NR_024409    | 134.1560679 | 3.419819717 | 1.33E-14    | 39.22898837 |
| IL17RC       | NM_001203264 | 86.65939651 | 10.63963329 | 6.56E-06    | 8.144960838 |
| KCTD14       | NM_023930    | 94.76272513 | 9.518724225 | 1.17E-06    | 9.95540189  |
| CSDE1        | NM_001242893 | 141.06595   | 5.168419308 | 6.84E-13    | 27.29382846 |
| PQLC3        | NM_152391    | 165.9274965 | 11.42357289 | 8.92E-13    | 14.52500877 |
| ITFG3        | NR_104317    | 51.7890429  | 7.719787151 | 0.002495399 | 6.70861021  |
| CTSC         | NM_001114173 | 144.1648751 | 4.955655728 | 2.08E-13    | 29.09097867 |
| PPCS         | NM_001287509 | 188.7230929 | 13.14943591 | 5.17E-15    | 14.35218166 |
| SKP2         | NM_001243120 | 166.9604715 | 5.693555033 | 7.21E-15    | 29.32446784 |
| SMPD4        | NM_017951    | 92.53630363 | 14.77967792 | 1.26E-05    | 6.261050083 |
| SACM1L       | NM_014016    | 120.1758322 | 4.865413657 | 1.24E-10    | 24.7000236  |
| SPRYD4       | NM_207344    | 96.5077322  | 15.6350347  | 1.55E-05    | 6.172530735 |
| APOA1BP      | NM_144772    | 170.0593965 | 35.65748102 | 1.92E-07    | 4.769248742 |
| SLC22A15     | NM_018420    | 47.65714286 | 4.35567805  | 0.00133544  | 10.94138325 |
| ASXL1        | NM_001164603 | 71.64618576 | 12.44098818 | 0.000418799 | 5.758882232 |
| C4orf22      | NM_001206997 | 31.77142857 | 0.728384204 | 0.001888918 | 43.61905211 |
| ARFIP2       | NM_001242856 | 149.0088072 | 33.30112209 | 1.67E-06    | 4.474588176 |
| LRRC20       | NM_018239    | 184.7516643 | 7.211968229 | 7.58E-16    | 25.6173708  |
| R3HCC1L      | NM_001256619 | 123.2747572 | 2.90507409  | 7.27E-12    | 42.43429027 |
| ZNF3         | NM_001278290 | 120.3363036 | 9.675162009 | 6.32E-09    | 12.43765257 |
| SH2B1        | NM_001145795 | 141.06595   | 11.02247643 | 4.99E-11    | 12.79802691 |
| CALM3        | NM_005184    | 143.1319    | 19.30233234 | 6.09E-09    | 7.415264516 |
| GABARAPL1    | NM_031412    | 105.3230929 | 6.686336103 | 1.35E-08    | 15.75198902 |
| NPM2         | NM_001286680 | 54.72749646 | 9.298812416 | 0.003379836 | 5.885428592 |
| KIAA1958     | NM_133465    | 39.87475719 | 3.471172398 | 0.00188258  | 11.48740328 |
| ACCS         | NM_032592    | 173.8703536 | 9.249490734 | 4.71E-15    | 18.79782991 |
| UCHL3        | NM_006002    | 248.4549929 | 2.141375301 | 1.03E-27    | 116.0258983 |
| CYP2S1       | NM_030622    | 117.5583215 | 10.25834134 | 2.02E-08    | 11.4597787  |
| CDKN2B-AS1   | NR_047532    | 49.72309288 | 5.458419622 | 0.00140334  | 9.109430262 |
| ELP6         | NM_001031703 | 177.8417822 | 15.90500068 | 2.03E-12    | 11.18150107 |
| RPL21        | NM_000982    | 164.8945215 | 15.84912026 | 8.58E-12    | 10.4040173  |
| TTLL11       | NM_001139442 | 44.87916077 | 5.926015978 | 0.002586893 | 7.573243296 |
| NDUFA8       | NM_014222    | 139.1604715 | 6.358379338 | 8.17E-13    | 21.88615433 |
| CSRP1        | NM_001193571 | 47.81761433 | 6.781468782 | 0.003876688 | 7.05121794  |

|              |              |             |             |             |             |
|--------------|--------------|-------------|-------------|-------------|-------------|
| COPS7B       | NM_022730    | 138.2879679 | 10.03997945 | 8.40E-11    | 13.77373017 |
| LZIC         | NM_032368    | 47.81761433 | 5.016563775 | 0.000740221 | 9.531945866 |
| ME2          | NM_001168335 | 132.4110608 | 3.92795187  | 8.59E-12    | 33.70994992 |
| ACOT9        | NM_001037171 | 96.34726073 | 2.874218658 | 1.03E-09    | 33.52120078 |
| BAZ2B        | NR_110586    | 72.5186893  | 3.397980001 | 2.78E-06    | 21.34170574 |
| FBXW8        | NM_153348    | 115.3319    | 6.039777935 | 9.69E-10    | 19.09538749 |
| MSANTD2      | NM_001301087 | 116.3648751 | 7.406159503 | 1.60E-09    | 15.71190507 |
| RUSC2        | NM_014806    | 109.4549929 | 6.009011579 | 2.66E-09    | 18.21514096 |
| DPYSL2       | NM_001386    | 49.88356436 | 5.722290955 | 0.001353658 | 8.717411392 |
| INPP5J       | NM_001284285 | 102.3846393 | 8.898548074 | 6.91E-08    | 11.50576908 |
| CENPA        | NM_001042426 | 71.64618576 | 11.96244398 | 0.000296561 | 5.989259875 |
| ENOPH1       | NM_021204    | 130.3451108 | 9.506326004 | 4.37E-10    | 13.71140762 |
| SIGMAR1      | NM_001282207 | 253.4593965 | 25.09523053 | 1.16E-16    | 10.0999031  |
| SLC39A1      | NM_001271957 | 175.9363036 | 19.55098299 | 8.82E-12    | 8.998846949 |
| FAM21C       | NM_001169106 | 161.0835644 | 4.90087223  | 1.16E-14    | 32.86834604 |
| P4HA1        | NM_001142595 | 195.7934465 | 4.000806045 | 2.03E-18    | 48.93849996 |
| ZNF621       | NM_001287245 | 257.2703536 | 13.76255349 | 4.41E-21    | 18.69350435 |
| RPL6         | NM_001024662 | 256.3978501 | 26.10030887 | 2.59E-17    | 9.823556162 |
| CD47         | NM_198793    | 111.3604715 | 4.661375026 | 7.51E-10    | 23.89004765 |
| MRPL18       | NM_014161    | 119.3033286 | 9.02035928  | 1.93E-09    | 13.2260063  |
| ZSWIM3       | NR_037628    | 111.3604715 | 8.229560794 | 3.85E-09    | 13.53176363 |
| BTN2A1       | NM_001197234 | 80.46154644 | 12.33558409 | 8.99E-05    | 6.522718816 |
| WDR81        | NM_152348    | 80.78248939 | 13.36937522 | 0.000100331 | 6.042353367 |
| SEC11A       | NM_001271918 | 205.6417822 | 6.261846641 | 1.64E-18    | 32.84043733 |
| CRYBB2P1     | NR_033733    | 234.4747572 | 10.42229822 | 2.75E-20    | 22.49741393 |
| RIOK2        | NM_018343    | 102.7055823 | 3.559428009 | 1.08E-09    | 28.85451877 |
| POLR3B       | NM_018082    | 218.5890429 | 4.746898505 | 3.94E-20    | 46.04881327 |
| YWHAG        | NM_012479    | 392.4593965 | 10.91832143 | 3.40E-36    | 35.94503047 |
| ZFAND4       | NR_104256    | 40.74726073 | 2.989910992 | 0.001395138 | 13.62825209 |
| SMIM19       | NM_001135675 | 137.0945215 | 12.83420814 | 8.41E-10    | 10.68196183 |
| PEPD         | NM_001166057 | 109.4549929 | 7.748359885 | 2.55E-08    | 14.12621439 |
| LCORL        | NM_001166139 | 133.1230929 | 3.375943377 | 7.19E-13    | 39.43285714 |
| ZSCAN26      | NM_152736    | 160.0505893 | 8.701597479 | 1.73E-13    | 18.39324213 |
| CCDC40       | NM_001243342 | 79.74951438 | 9.78738125  | 3.59E-05    | 8.148197393 |
| SEZ6L2       | NM_001114100 | 52.66154644 | 6.8996543   | 0.002320105 | 7.632490579 |
| SLC39A9      | NM_018375    | 126.2132108 | 5.090933611 | 3.97E-11    | 24.79176128 |
| PTBP2        | NM_021190    | 138.1274965 | 4.138837795 | 3.38E-12    | 33.37349838 |
| DCXR         | NM_016286    | 408.3451108 | 57.78470571 | 2.39E-20    | 7.066664193 |
| LOC101929378 | NR_110249    | 94.44178218 | 2.853628299 | 9.53E-09    | 33.09533417 |
| RPP14        | NR_049758    | 185.7846393 | 13.5859631  | 1.78E-14    | 13.67474929 |
| ATXN3        | NM_001164780 | 116.3648751 | 4.860906175 | 2.03E-10    | 23.93892638 |
| ARHGEF2      | NM_001162383 | 69.74070721 | 8.952859064 | 7.99E-05    | 7.789769359 |
| EMC3-AS1     | NR_103821    | 117.3978501 | 6.69436395  | 6.14E-10    | 17.53681917 |
| LINC00115    | NR_024321    | 187.8505893 | 33.30105442 | 6.36E-08    | 5.640980222 |
| COG5         | NM_006348    | 75.61761433 | 3.696918976 | 1.03E-06    | 20.45422548 |
| EIF2A        | NM_032025    | 68.7077322  | 4.84160103  | 1.46E-05    | 14.19111814 |
| SEPT7P9      | NR_027269    | 121.3692786 | 3.969364122 | 9.78E-12    | 30.57650418 |
| RPL8         | NM_033301    | 219.9429609 | 40.35306713 | 4.77E-10    | 5.450464525 |
| DUS4L        | NM_001270419 | 193.7274965 | 4.672186264 | 2.96E-20    | 41.46399255 |
| NAF1         | NM_138386    | 131.3780858 | 4.201398053 | 3.23E-12    | 31.27008775 |
| MAP3K13      | NM_001242317 | 146.2308251 | 5.00886765  | 1.04E-12    | 29.19438789 |
| MYD88        | NM_001172568 | 76.49011787 | 15.34750539 | 0.000487838 | 4.983879526 |
| CXCL3        | NM_002090    | 106.3560679 | 4.265214381 | 7.67E-10    | 24.93569101 |
| ZCCHC10      | NM_001300818 | 171.9648751 | 4.042892012 | 3.59E-17    | 42.5351146  |
| EIF3C        | NM_001267574 | 294.3671287 | 39.97451681 | 4.42E-17    | 7.36386959  |
| LMNB1        | NM_005573    | 172.9978501 | 8.88316913  | 8.54E-15    | 19.47478963 |
| MRPL40       | NM_003776    | 299.0505893 | 21.09938043 | 1.32E-22    | 14.1734299  |
| GRB7         | NM_005310    | 82.52749646 | 16.47458935 | 0.000330936 | 5.009381097 |
| BSCL2        | NM_001130702 | 252.26595   | 22.19165672 | 2.57E-17    | 11.36760329 |
| GCH1         | NM_000161    | 231.6967751 | 5.469729379 | 4.11E-22    | 42.35982424 |
| MFS1         | NM_022736    | 88.56487506 | 4.494846633 | 9.16E-08    | 19.70364782 |
| IMPA1        | NM_005536    | 334.953918  | 8.048741995 | 5.08E-32    | 41.6156858  |

|            |              |             |             |             |             |
|------------|--------------|-------------|-------------|-------------|-------------|
| SMPD1      | NM_001007593 | 136.0615464 | 20.66978442 | 5.21E-08    | 6.582630167 |
| EIF6       | NM_001267810 | 110.3274965 | 17.31421525 | 1.78E-06    | 6.372076057 |
| SCAMP1-AS1 | NR_105014    | 143.1319    | 26.46479015 | 1.38E-06    | 5.40838976  |
| ORC5       | NM_181747    | 309.9319    | 3.770986237 | 4.30E-33    | 82.18855243 |
| CDK5RAP1   | NM_001278169 | 227.4044036 | 8.12610481  | 1.16E-20    | 27.98442906 |
| LINC01123  | NR_046110    | 333.7604715 | 63.30402812 | 1.22E-15    | 5.272341767 |
| CRYBG3     | NM_153605    | 218.5890429 | 3.886544246 | 1.79E-20    | 56.2425201  |
| CYB5R4     | NM_016230    | 215.8110608 | 3.390317239 | 8.88E-22    | 63.65512299 |
| COL13A1    | NM_080802    | 169.898925  | 7.727332562 | 6.27E-14    | 21.98674946 |
| KIF27      | NM_017576    | 56.63297501 | 3.765226404 | 3.88E-05    | 15.04105436 |
| OIP5       | NM_007280    | 215.6505893 | 8.520299686 | 4.38E-19    | 25.31021176 |
| RLIM       | NM_183353    | 63.70332862 | 3.11229344  | 5.61E-06    | 20.46829126 |
| ASH2L      | NM_001105214 | 106.5165394 | 5.593119327 | 2.44E-09    | 19.04421006 |
| SCFD1      | NM_182835    | 230.5033286 | 2.815573777 | 2.03E-23    | 81.86726644 |
| ZNF774     | NM_001004309 | 109.4549929 | 7.071659404 | 5.65E-09    | 15.4779786  |
| C14orf159  | NM_001102368 | 105.4835644 | 8.460332177 | 4.55E-08    | 12.46801688 |
| RTCA       | NM_001130841 | 161.0835644 | 6.903078222 | 3.05E-14    | 23.3350339  |
| SNX21      | NM_152897    | 178.0022537 | 15.09989562 | 2.77E-13    | 11.78831021 |
| ST7L       | NM_138728    | 99.44618576 | 5.102558933 | 1.98E-08    | 19.48947324 |
| CCDC63     | NM_001286243 | 132.2505893 | 6.466574022 | 9.93E-11    | 20.45141506 |
| HIPK1-AS1  | NR_110726    | 100.4791608 | 9.229480338 | 1.26E-07    | 10.88676254 |
| GK5        | NR_033289    | 266.2461858 | 3.775567722 | 2.59E-26    | 70.5181857  |
| PANK2      | NM_153640    | 96.5077322  | 8.630705698 | 1.70E-07    | 11.18190512 |
| DDX52      | NM_001291476 | 161.9560679 | 6.716834193 | 2.57E-14    | 24.11196454 |
| CHCHD4     | NM_001098502 | 60.60440358 | 12.6736279  | 0.003453454 | 4.781930169 |
| CCDC120    | NM_001163323 | 85.46595002 | 14.14853241 | 6.96E-05    | 6.04062298  |
| PTPRG      | NM_002841    | 111.3604715 | 4.741716738 | 2.57E-09    | 23.48526443 |
| FGF18      | NM_003862    | 61.6373786  | 14.11562617 | 0.002693152 | 4.366606048 |
| MFF        | NM_001277064 | 63.70332862 | 4.132898487 | 4.41E-05    | 15.41371723 |
| VAV2       | NM_001134398 | 157.9846393 | 7.552637891 | 8.92E-13    | 20.91780933 |
| ARL17A     | NM_001288811 | 92.53630363 | 8.413381301 | 6.72E-07    | 10.99870555 |
| ZMAT1      | NM_001011657 | 123.1142857 | 0.957354979 | 5.70E-14    | 128.5983657 |
| ESR2       | NM_001291712 | 125.1802357 | 3.554231159 | 4.59E-12    | 35.2200603  |
| GM2A       | NM_001167607 | 86.49892504 | 11.72547878 | 2.67E-05    | 7.377005805 |
| ASNSD1     | NM_019048    | 141.06595   | 8.287875371 | 1.44E-11    | 17.0207615  |
| C14orf166  | NM_016039    | 150.0417822 | 4.623100183 | 8.76E-15    | 32.45479791 |
| SETMAR     | NR_075073    | 52.82201792 | 5.408405997 | 0.000420296 | 9.766651753 |
| SPA17      | NM_017425    | 54.72749646 | 4.849750665 | 0.00026279  | 11.28460002 |
| SDC1       | NM_002997    | 72.5186893  | 17.262493   | 0.00147937  | 4.200939535 |
| RREB1      | NM_001003700 | 78.55606789 | 7.336037834 | 1.83E-05    | 10.70824192 |
| TM9SF2     | NM_004800    | 82.68796794 | 3.723167953 | 8.19E-08    | 22.20903515 |
| GCDH       | NM_013976    | 134.3165394 | 13.82088104 | 1.11E-09    | 9.718377504 |
| SEC1P      | NR_004401    | 96.34726073 | 10.80244955 | 1.07E-06    | 8.919019737 |
| DEK        | NM_003472    | 67.67475719 | 4.556862772 | 1.44E-05    | 14.85117296 |
| TRPM7      | NM_001301212 | 219.4615464 | 4.49430303  | 2.70E-20    | 48.83105233 |
| NXNL2      | NM_145283    | 60.76487506 | 7.023253893 | 0.000463213 | 8.651954775 |
| PMS2P4     | NR_046299    | 174.9033286 | 3.705103439 | 6.37E-18    | 47.20605821 |
| ANAPC1     | NM_022662    | 154.0132108 | 4.143984654 | 7.97E-14    | 37.16548772 |
| PDIK1L     | NM_001243533 | 111.520943  | 8.423365141 | 1.05E-08    | 13.23947628 |
| TMEM248    | NM_017994    | 48.69011787 | 6.391929408 | 0.001225334 | 7.617436733 |
| MTMR12     | NM_001294344 | 137.2549929 | 6.081670817 | 4.53E-12    | 22.56863238 |
| EXOSC5     | NM_020158    | 95.47475719 | 19.61253446 | 0.000129081 | 4.868047901 |
| ARRB2      | NM_001257331 | 93.40880717 | 13.61878321 | 1.18E-05    | 6.858821798 |
| CLK4       | NM_020666    | 155.0461858 | 3.710465605 | 1.22E-15    | 41.78618057 |
| ISCA1      | NM_030940    | 216.6835644 | 7.80967166  | 3.96E-20    | 27.74554089 |
| OASL       | NM_003733    | 77.52309288 | 6.939283838 | 8.02E-06    | 11.17162732 |
| FLAD1      | NM_025207    | 111.3604715 | 12.37554198 | 2.19E-07    | 8.99843188  |
| TINAGL1    | NM_022164    | 167.832975  | 17.6979921  | 2.52E-11    | 9.48316476  |
| LOC642846  | NR_024374    | 155.0461858 | 10.51435421 | 2.81E-12    | 14.74614443 |
| ICA1       | NM_001276478 | 58.69892504 | 3.633447147 | 2.27E-05    | 16.15516138 |
| TMEM263    | NM_152261    | 106.6770108 | 8.055522465 | 1.14E-08    | 13.24271781 |
| MPP3       | NM_001932    | 65.60880717 | 9.442489692 | 0.000510416 | 6.948252983 |

|          |              |             |             |             |             |
|----------|--------------|-------------|-------------|-------------|-------------|
| SEPT7P2  | NR_024271    | 101.3516643 | 4.664985174 | 1.07E-08    | 21.7260421  |
| TRIM23   | NM_033228    | 90.63082508 | 5.39951887  | 7.22E-08    | 16.78498164 |
| HELLS    | NM_001289074 | 197.698925  | 5.35806054  | 1.29E-18    | 36.89747877 |
| TBC1D13  | NM_018201    | 138.1274965 | 11.72076199 | 5.77E-10    | 11.78485636 |
| DBR1     | NM_016216    | 288.0088072 | 5.45722508  | 3.19E-31    | 52.77568781 |
| NOP14    | NM_001291979 | 110.3274965 | 13.88372557 | 1.92E-07    | 7.946533941 |
| FAM160A1 | NM_001109977 | 106.3560679 | 3.434889071 | 7.64E-10    | 30.9634651  |
| CETN3    | NM_001297765 | 215.4901179 | 7.465951592 | 4.07E-20    | 28.86304783 |
| SZRD1    | NR_073500    | 96.34726073 | 9.745217585 | 8.39E-07    | 9.886619759 |
| NMNAT1   | NM_022787    | 211.8396323 | 8.004838299 | 6.14E-19    | 26.46394897 |
| POLL     | NM_013274    | 175.0638001 | 24.59080774 | 5.03E-10    | 7.119074817 |
| STRADA   | NM_001165969 | 265.3736822 | 13.83227809 | 4.36E-21    | 19.18510317 |
| RASSF5   | NM_182663    | 84.59344649 | 9.096892865 | 2.94E-06    | 9.299158266 |
| RTEL1    | NM_016434    | 123.2747572 | 23.60731031 | 3.91E-06    | 5.221889135 |
| METTL2B  | NM_018396    | 161.0835644 | 12.56046627 | 4.71E-12    | 12.82464846 |
| TRAPPC1  | NM_021210    | 136.2220179 | 22.00274353 | 7.26E-07    | 6.191137835 |
| CEP112   | NM_001199165 | 94.44178218 | 3.426710038 | 1.19E-08    | 27.56048254 |
| ZNF207   | NM_003457    | 267.2791608 | 9.730449738 | 3.72E-24    | 27.46832551 |
| SNX5     | NM_152227    | 108.5824894 | 17.25591261 | 1.53E-06    | 6.292480254 |
| MAP3K4   | NM_001291958 | 142.098925  | 3.758726677 | 9.24E-14    | 37.80506997 |
| MYZAP    | NM_152451    | 92.37583215 | 6.151277125 | 1.43E-07    | 15.01734197 |
| NDUFC1   | NM_002494    | 184.0396323 | 14.70757674 | 1.21E-13    | 12.51325324 |
| C2orf68  | NM_001013649 | 194.7604715 | 24.05685977 | 2.45E-12    | 8.09583933  |
| CTNND1   | NM_001085462 | 103.4176143 | 7.49936441  | 6.17E-08    | 13.7901839  |
| CHEK2    | NM_145862    | 165.9274965 | 7.231309629 | 3.84E-14    | 22.94570485 |
| YIPF4    | NM_032312    | 84.43297501 | 4.267252592 | 1.79E-07    | 19.78626135 |
| ALKBH5   | NM_017758    | 96.5077322  | 11.56841812 | 8.43E-07    | 8.342344754 |
| GEMIN2   | NM_001009183 | 171.0923715 | 4.56099272  | 1.89E-17    | 37.51209046 |
| IMMP2L   | NM_001244606 | 118.2703536 | 2.16413819  | 7.03E-11    | 54.65009312 |
| SNX13    | NM_015132    | 166.9604715 | 2.044727526 | 2.03E-16    | 81.65414185 |
| FHL2     | NM_001450    | 97.38023574 | 10.75539624 | 9.99E-07    | 9.054081653 |
| HERC6    | NM_017912    | 92.53630363 | 5.441766213 | 1.15E-07    | 17.00482895 |
| ANKRD42  | NM_001300977 | 110.4879679 | 4.584985331 | 1.80E-10    | 24.09778003 |
| ILK      | NM_004517    | 151.0747572 | 29.41340202 | 1.29E-07    | 5.136255815 |
| SPG21    | NM_001127889 | 50.91653937 | 6.881186985 | 0.002283013 | 7.3993832   |
| AREG     | NM_001657    | 520.4176143 | 16.79517358 | 5.25E-50    | 30.98614086 |
| TECR     | NM_138501    | 309.0593965 | 10.16028292 | 6.22E-27    | 30.4183849  |
| DCLRE1C  | NM_001033855 | 138.2879679 | 7.899137234 | 2.75E-11    | 17.50671799 |
| CD99L2   | NM_001242614 | 50.75606789 | 4.419577115 | 0.000774098 | 11.48437205 |
| ZNF133   | NM_001282997 | 51.7890429  | 4.027736688 | 0.000530199 | 12.85810045 |
| MBD4     | NM_003925    | 102.5451108 | 10.89762624 | 2.83E-07    | 9.409857575 |
| KIAA0141 | NM_001142603 | 269.3451108 | 12.50691169 | 6.79E-23    | 21.53570101 |
| MAP2K7   | NM_001297556 | 78.55606789 | 10.93149698 | 0.000102469 | 7.186213203 |
| DCAF6    | NM_001017977 | 105.3230929 | 3.283292227 | 5.67E-10    | 32.07850096 |
| DYNC1LI2 | NM_006141    | 128.1186893 | 10.20036906 | 8.99E-10    | 12.56020135 |
| ARNT     | NM_001286036 | 67.67475719 | 4.095538779 | 1.73E-05    | 16.52401817 |
| CYB5A    | NM_001190807 | 44.87916077 | 6.380657218 | 0.002229898 | 7.033626669 |
| GDA      | NM_001242506 | 155.0461858 | 3.699383703 | 4.69E-15    | 41.91135557 |
| ATXN7L3B | NM_001136262 | 246.2285714 | 22.36665193 | 3.96E-17    | 11.00873623 |
| PAK2     | NM_002577    | 169.898925  | 4.309095908 | 2.23E-15    | 39.42797483 |
| RBM19    | NM_016196    | 57.66595002 | 7.656294656 | 0.000967597 | 7.531835256 |
| TMEM138  | NM_016464    | 189.7560679 | 17.54954115 | 2.60E-13    | 10.81259426 |
| NKIRAS2  | NM_001144928 | 143.1319    | 15.4240708  | 8.39E-10    | 9.279774575 |
| NRF1     | NM_005011    | 57.66595002 | 6.56310586  | 0.000250455 | 8.786381213 |
| ZNF160   | NM_198893    | 110.3274965 | 7.42023847  | 6.45E-09    | 14.86845698 |
| DUOX1    | NM_017434    | 134.3165394 | 13.72754515 | 1.99E-09    | 9.784454389 |
| CEBPZ    | NM_005760    | 155.2066572 | 5.796496077 | 1.09E-13    | 26.7759445  |
| CAPRIN2  | NR_038177    | 71.64618576 | 3.339642327 | 9.46E-07    | 21.4532512  |
| CYTH1    | NM_017456    | 78.55606789 | 8.947190075 | 1.81E-05    | 8.779970833 |
| GTF2H3   | NM_001271868 | 233.4417822 | 10.49197401 | 1.36E-19    | 22.2495578  |
| U2AF1    | NM_006758    | 115.3319    | 10.44502607 | 4.15E-08    | 11.04180107 |
| LEPRE1   | NM_022356    | 179.9077322 | 10.47366765 | 1.85E-14    | 17.17714732 |

|            |              |             |             |             |             |
|------------|--------------|-------------|-------------|-------------|-------------|
| RBM6       | NM_005777    | 179.9077322 | 7.247701379 | 4.54E-15    | 24.82272969 |
| THAP5      | NM_001130475 | 160.0505893 | 9.406923844 | 2.52E-13    | 17.01412619 |
| TINCR      | NR_027064    | 70.61321075 | 8.084997962 | 7.21E-05    | 8.733856345 |
| ZBTB6      | NM_006626    | 144.1648751 | 9.227084213 | 4.44E-12    | 15.62409876 |
| SERPINB9P1 | NR_033851    | 53.69452145 | 11.80370777 | 0.004215424 | 4.548953812 |
| GEN1       | NM_001130009 | 80.62201792 | 4.202749763 | 7.74E-07    | 19.18315923 |
| PEX14      | NM_004565    | 82.52749646 | 6.759379006 | 1.08E-06    | 12.20933112 |
| HNRNPUL2   | NM_001079559 | 118.4308251 | 11.7717153  | 2.62E-08    | 10.060626   |
| HTRA2      | NM_013247    | 189.0440358 | 22.01949174 | 1.01E-11    | 8.58530424  |
| IFT43      | NR_045664    | 50.91653937 | 6.538173088 | 0.000780822 | 7.787578989 |
| RALGAPA1P  | NR_104269    | 105.3230929 | 2.279235593 | 6.66E-10    | 46.20983157 |
| NF2        | NM_181831    | 158.1451108 | 6.677396172 | 4.16E-13    | 23.68364954 |
| LYSMD3     | NM_001286812 | 173.8703536 | 7.113769066 | 6.22E-16    | 24.4413829  |
| DDIT3      | NM_001195055 | 369.5033286 | 43.28384202 | 3.74E-22    | 8.536749774 |
| ENOX1      | NM_001242863 | 57.66595002 | 2.068104376 | 4.66E-05    | 27.88348145 |
| FAM178A    | NM_018121    | 207.7077322 | 8.847159706 | 2.24E-17    | 23.477335   |
| TIMELESS   | NM_003920    | 293.3341537 | 11.72260889 | 2.33E-25    | 25.02294126 |
| POMP       | NM_015932    | 198.7319    | 9.681722198 | 1.00E-16    | 20.52650303 |
| MAP3K6     | NM_001297609 | 144.1648751 | 15.38255802 | 1.55E-09    | 9.371970183 |
| RPL7A      | NM_000972    | 235.5077322 | 40.07376595 | 9.86E-12    | 5.87685551  |
| ABLIM2     | NM_032432    | 130.1846393 | 7.245818393 | 2.09E-10    | 17.96686478 |
| DRG2       | NM_001388    | 143.2923715 | 16.79440483 | 4.13E-09    | 8.532149427 |
| ZNF485     | NM_145312    | 47.81761433 | 5.808587048 | 0.000747652 | 8.23222824  |
| CPA6       | NM_020361    | 52.82201792 | 4.819019964 | 0.00082329  | 10.96115358 |
| ZNF460     | NM_006635    | 108.2615464 | 6.761770735 | 2.35E-09    | 16.01082774 |
| ARF1       | NM_001024226 | 78.71653937 | 16.39243345 | 0.00028363  | 4.802004511 |
| CARD8      | NM_001184902 | 183.0066572 | 5.106778168 | 2.37E-17    | 35.83603032 |
| SPATA41    | NR_028140    | 55.76047148 | 6.794582782 | 0.000240758 | 8.206607125 |
| FBXL18     | NM_024963    | 137.4154644 | 9.155474885 | 1.50E-10    | 15.00910287 |
| SETD1A     | NM_014712    | 62.67035361 | 13.59986931 | 0.002551388 | 4.608158518 |
| PLGRKT     | NM_018465    | 267.2791608 | 4.762634109 | 7.73E-26    | 56.12002826 |
| ARL2       | NM_001667    | 122.2417822 | 17.33553723 | 2.77E-07    | 7.051513924 |
| SH3BGR1    | NM_003022    | 41.78023574 | 0.792772927 | 7.62E-05    | 52.7013907  |
| KAT8       | NM_032188    | 154.0132108 | 17.28547449 | 2.11E-10    | 8.909978769 |
| PECR       | NM_018441    | 306.9934465 | 4.819154189 | 2.83E-30    | 63.70276493 |
| PPA2       | NM_176867    | 203.7363036 | 4.901870215 | 1.12E-18    | 41.56297387 |
| NT5C2      | NM_012229    | 147.9758322 | 6.926267335 | 3.70E-12    | 21.36444134 |
| SARAF      | NM_001284239 | 145.0373786 | 7.710199142 | 4.87E-12    | 18.81110668 |
| NEDD4      | NM_006154    | 89.59785007 | 2.946454833 | 3.18E-08    | 30.40869627 |
| TMEM106C   | NM_001143843 | 208.7407072 | 12.15315276 | 2.68E-17    | 17.17584822 |
| DNAJB14    | NM_001278310 | 94.44178218 | 3.429518327 | 3.83E-09    | 27.53791442 |
| NFS1       | NR_037570    | 134.3165394 | 10.77597542 | 2.67E-10    | 12.46444374 |
| CXorf38    | NM_144970    | 81.49452145 | 3.058792786 | 1.34E-07    | 26.64270748 |
| GBE1       | NM_000158    | 130.1846393 | 2.352549196 | 1.78E-12    | 55.33769052 |
| RBL1       | NM_002895    | 232.5692786 | 5.122280437 | 1.40E-21    | 45.40346463 |
| CDPF1      | NM_207327    | 236.5407072 | 22.20757548 | 1.99E-16    | 10.65135217 |
| MTUS1      | NM_001001925 | 41.78023574 | 4.795854649 | 0.004431306 | 8.711739366 |
| CLK2       | NM_003993    | 100.3186893 | 22.79246145 | 0.000125137 | 4.401397783 |
| C1orf216   | NM_152374    | 229.4703536 | 27.65229809 | 2.78E-14    | 8.29841892  |
| KDM2A      | NM_012308    | 106.3560679 | 6.858124838 | 7.10E-09    | 15.50803906 |
| ALDH3A2    | NM_000382    | 175.9363036 | 3.838076749 | 5.58E-18    | 45.8397044  |
| ITPR1      | NM_001099952 | 141.06595   | 5.088710878 | 4.54E-12    | 27.72135289 |
| AARS       | NM_001605    | 234.4747572 | 11.21297801 | 3.69E-19    | 20.91101552 |
| NCSTN      | NM_001290184 | 164.0220179 | 10.64557666 | 5.45E-13    | 15.40752776 |
| BCAS3      | NM_001099432 | 172.9978501 | 4.388159973 | 2.87E-15    | 39.42377925 |
| SAMM50     | NM_015380    | 100.4791608 | 8.530678705 | 1.02E-07    | 11.77856584 |
| VDAC1      | NM_003374    | 272.1230929 | 13.78949486 | 7.21E-22    | 19.73408712 |
| GCAT       | NM_014291    | 201.6703536 | 19.53287158 | 2.74E-14    | 10.3246649  |
| FLYWCH2    | NM_001142499 | 95.47475719 | 11.78504001 | 4.30E-06    | 8.101351975 |
| GLIPR1L2   | NM_152436    | 54.88796794 | 0.902940799 | 1.32E-05    | 60.78800291 |
| STX16      | NR_037942    | 228.5978501 | 9.308621976 | 4.04E-20    | 24.55764674 |
| ZNF611     | NM_001161501 | 83.72094295 | 5.966114125 | 5.53E-07    | 14.03274245 |

|            |              |             |             |             |             |
|------------|--------------|-------------|-------------|-------------|-------------|
| CKLF       | NM_001040138 | 123.2747572 | 9.857002335 | 9.03E-10    | 12.50631308 |
| EAF1       | NM_033083    | 201.8308251 | 6.023036107 | 1.50E-19    | 33.5098149  |
| ZNF397     | NM_032347    | 215.6505893 | 13.55113698 | 4.17E-17    | 15.91383732 |
| ZSCAN32    | NM_001284529 | 140.1934465 | 9.899080275 | 2.97E-11    | 14.16226989 |
| DDX21      | NM_001256910 | 101.5121358 | 6.869915108 | 3.28E-08    | 14.77633045 |
| RRBP1      | NM_001042576 | 189.7560679 | 11.16419312 | 4.18E-15    | 16.9968457  |
| ZNF613     | NM_024840    | 63.70332862 | 2.322872553 | 2.06E-06    | 27.42437528 |
| ULK1       | NM_003565    | 55.6        | 11.89639266 | 0.004413936 | 4.673685679 |
| CDIP1      | NM_001199056 | 63.54285714 | 10.1816878  | 0.00086606  | 6.240896244 |
| STRAP      | NM_007178    | 121.3692786 | 6.646137955 | 3.27E-10    | 18.26162494 |
| B9D2       | NM_030578    | 126.3736822 | 10.44419315 | 1.22E-09    | 12.099899   |
| NUP50-AS1  | NR_038956    | 235.3472607 | 7.587888679 | 5.61E-21    | 31.01617205 |
| CCDC71L    | NM_175884    | 91.50332862 | 9.751329778 | 2.86E-06    | 9.383676965 |
| UBE2B      | NM_003337    | 67.67475719 | 11.55959182 | 0.000272069 | 5.85442447  |
| HMGB2      | NM_002129    | 178.0022537 | 19.74686421 | 2.10E-11    | 9.01420356  |
| CXADR      | NM_001207065 | 133.2835644 | 4.788993758 | 4.23E-12    | 27.83122533 |
| LMCD1-AS1  | NR_033378    | 67.83522867 | 4.087200948 | 3.65E-06    | 16.59698888 |
| PEX5       | NM_001131024 | 41.78023574 | 6.233348241 | 0.003554779 | 6.702695585 |
| CCPG1      | NM_001204451 | 56.79344649 | 4.161889513 | 0.00019578  | 13.64607261 |
| PGAP1      | NM_024989    | 217.5560679 | 1.040119644 | 1.91E-24    | 209.1644641 |
| GPATCH4    | NM_015590    | 127.2461858 | 26.19795072 | 3.34E-06    | 4.857104555 |
| PPP2R5C    | NM_178587    | 116.3648751 | 7.563835836 | 3.67E-09    | 15.38437343 |
| EML4       | NM_001145076 | 187.6901179 | 4.314318296 | 4.72E-17    | 43.50400341 |
| NME1-NME2  | NR_037149    | 314.0638001 | 38.86731394 | 4.42E-19    | 8.080409172 |
| PSMB6      | NM_002798    | 227.5648751 | 27.16706659 | 1.85E-13    | 8.376497858 |
| LOC652276  | NR_015441    | 255.3648751 | 12.19201544 | 1.62E-21    | 20.94525522 |
| DBF4B      | NR_036623    | 97.54070721 | 7.876221654 | 1.84E-07    | 12.38420038 |
| USP2       | NM_001243759 | 74.7451108  | 9.828319504 | 8.96E-05    | 7.605075391 |
| RBPMS      | NM_001008711 | 105.4835644 | 5.598914647 | 7.31E-09    | 18.84000221 |
| ABCB10     | NM_012089    | 66.64178218 | 7.398983799 | 0.000148368 | 9.006883106 |
| ATP1A1-AS1 | NR_024125    | 146.0703536 | 17.77091565 | 1.46E-09    | 8.219630124 |
| INO80      | NM_017553    | 69.58023574 | 6.097134831 | 2.25E-05    | 11.41195622 |
| LEPR       | NM_001003679 | 118.2703536 | 3.270903399 | 5.09E-11    | 36.15831445 |
| ATP6V1E1   | NM_001696    | 87.53190005 | 5.82995223  | 1.58E-07    | 15.01417106 |
| ZBTB21     | NM_001098403 | 125.1802357 | 10.13018919 | 1.23E-09    | 12.35714688 |
| DGCR5      | NR_110533    | 108.2615464 | 6.561211502 | 1.67E-08    | 16.50023725 |
| SUPT4H1    | NR_073470    | 231.6967751 | 17.72750488 | 2.32E-17    | 13.06990333 |
| HDAC10     | NM_001159286 | 196.8264215 | 33.06941674 | 3.06E-10    | 5.951916935 |
| NKX3-1     | NM_006167    | 263.3077322 | 18.31412213 | 1.53E-20    | 14.37730568 |
| FAM86C1    | NM_018172    | 125.1802357 | 5.970555441 | 1.92E-11    | 20.96626302 |
| PPME1      | NM_016147    | 77.52309288 | 5.189094893 | 3.06E-06    | 14.9396175  |
| MAPK14     | NM_001315    | 95.47475719 | 5.371970253 | 6.86E-08    | 17.77276356 |
| TYW3       | NM_138467    | 144.0044036 | 6.259969143 | 2.84E-12    | 23.00401173 |
| SUCLA2     | NM_003850    | 97.38023574 | 3.171251514 | 2.05E-09    | 30.70719408 |
| ALS2       | NM_001135745 | 90.63082508 | 6.435357518 | 3.16E-07    | 14.08326186 |
| PRCP       | NM_199418    | 111.520943  | 4.473711972 | 1.16E-09    | 24.92805609 |
| EFCAB11    | NM_001284268 | 169.0264215 | 3.155586912 | 3.46E-17    | 53.56417878 |
| EP400      | NM_015409    | 87.53190005 | 7.857461172 | 1.73E-06    | 11.13997233 |
| LRIF1      | NM_018372    | 182.8461858 | 4.630507053 | 1.81E-18    | 39.48729236 |
| WDR91      | NM_014149    | 199.6044036 | 7.562482687 | 2.15E-18    | 26.39403115 |
| SRSF3      | NM_003017    | 283.0044036 | 19.36647864 | 1.11E-21    | 14.61310591 |
| SNRPD3     | NM_004175    | 314.0638001 | 14.17517716 | 1.82E-26    | 22.15589947 |
| CYB561D2   | NR_111912    | 114.619868  | 21.61237449 | 4.51E-06    | 5.303437067 |
| MTMR2      | NM_201278    | 251.3934465 | 2.673525474 | 4.05E-26    | 94.03069053 |
| ALOX5      | NM_001256154 | 61.6373786  | 5.236817003 | 6.59E-05    | 11.77000811 |
| CLINT1     | NM_014666    | 98.41321075 | 3.646803764 | 2.95E-09    | 26.98615476 |
| ARL5A      | NM_001037174 | 69.74070721 | 3.286706672 | 1.20E-06    | 21.21902383 |
| HMMR       | NM_012485    | 76.49011787 | 6.019127414 | 2.05E-06    | 12.70784162 |
| RBM14      | NM_001198836 | 288.1692786 | 21.90046914 | 2.69E-21    | 13.15813268 |
| PIGP       | NM_153681    | 106.3560679 | 5.499937359 | 2.94E-09    | 19.33768713 |
| COA6       | NM_001206641 | 166.0879679 | 14.10289191 | 5.10E-12    | 11.77687307 |
| SHC1       | NM_183001    | 114.298925  | 26.95227947 | 5.59E-05    | 4.240788804 |

|            |              |             |             |             |             |
|------------|--------------|-------------|-------------|-------------|-------------|
| FAM91A1    | NM_144963    | 107.5495144 | 4.875496562 | 1.52E-09    | 22.05919192 |
| SMIM12     | NM_138428    | 199.7648751 | 14.43920204 | 8.13E-16    | 13.83489715 |
| NSUN6      | NM_182543    | 120.1758322 | 3.868328773 | 1.84E-11    | 31.06660245 |
| AFTPH      | NM_017657    | 145.1978501 | 3.94143749  | 2.66E-13    | 36.83880575 |
| RMND5A     | NM_022780    | 90.47035361 | 5.535826131 | 1.09E-07    | 16.34270143 |
| FTCDNL1    | NR_034096    | 47.65714286 | 3.153298553 | 0.000263666 | 15.11342553 |
| SNRPB2     | NM_003092    | 186.8176143 | 6.806395265 | 8.39E-18    | 27.44736488 |
| DCTPP1     | NM_024096    | 60.76487506 | 10.87993046 | 0.002215798 | 5.585042595 |
| KIF14      | NM_014875    | 92.53630363 | 2.789575559 | 8.70E-09    | 33.17218038 |
| RNF185     | NR_024212    | 120.3363036 | 6.921240704 | 1.10E-09    | 17.38652198 |
| CHPF2      | NM_019015    | 156.9516643 | 14.81824244 | 3.48E-11    | 10.59178677 |
| DHRS4-AS1  | NR_023923    | 157.1121358 | 8.547288555 | 1.74E-13    | 18.38151769 |
| PTAR1      | NM_001099666 | 217.5560679 | 2.896060932 | 4.28E-22    | 75.12137107 |
| RTN4       | NM_020532    | 165.9274965 | 4.895598241 | 4.06E-15    | 33.89320126 |
| ZNF251     | NM_138367    | 183.0066572 | 10.86666555 | 5.33E-15    | 16.84110515 |
| KIAA0556   | NM_015202    | 137.2549929 | 8.073926882 | 6.65E-11    | 16.99978151 |
| MAP2       | NM_001039538 | 169.898925  | 1.896798563 | 2.83E-16    | 89.57141171 |
| C17orf53   | NM_001171251 | 91.6638001  | 10.12891249 | 2.18E-06    | 9.049717846 |
| SERINC2    | NM_178865    | 50.75606789 | 8.10242881  | 0.00225523  | 6.264302851 |
| RPA3OS     | NR_034084    | 150.0417822 | 2.476952174 | 1.55E-14    | 60.5751632  |
| PIH1D2     | NM_001082619 | 167.120943  | 8.580375136 | 2.34E-14    | 19.4771138  |
| NRSN2-AS1  | NR_109990    | 117.2373786 | 22.91800576 | 6.70E-06    | 5.115513968 |
| ECD        | NM_001135753 | 235.5077322 | 5.625389677 | 2.23E-22    | 41.86514103 |
| REXO4      | NM_001279350 | 230.5033286 | 13.29795281 | 6.86E-19    | 17.33374543 |
| SIAE       | NM_170601    | 103.4176143 | 11.11805387 | 3.03E-07    | 9.301773095 |
| HAUS6      | NM_001270890 | 102.5451108 | 4.962790038 | 6.35E-09    | 20.66279452 |
| ARHGEF26   | NM_001251963 | 273.1560679 | 5.105555543 | 1.38E-25    | 53.50173269 |
| KIF24      | NM_194313    | 108.4220179 | 5.700299411 | 2.68E-09    | 19.02040754 |
| MPPE1      | NR_040243    | 176.9692786 | 12.15870085 | 8.45E-14    | 14.55494965 |
| SART1      | NM_005146    | 97.54070721 | 13.63615548 | 2.95E-06    | 7.153094385 |
| PAFAH1B2   | NR_110269    | 177.8417822 | 11.74023134 | 1.37E-13    | 15.14806455 |
| ZNF789     | NM_213603    | 161.0835644 | 13.59488896 | 9.15E-12    | 11.84883266 |
| ETF1       | NM_004730    | 106.6770108 | 9.960243395 | 1.53E-07    | 10.71028153 |
| CHST13     | NM_152889    | 44.7186893  | 4.949960553 | 0.001704669 | 9.03415064  |
| FLVCR1     | NM_014053    | 147.1033286 | 4.795259763 | 1.41E-13    | 30.67682167 |
| ODF2L      | NM_020729    | 176.9692786 | 3.28207414  | 2.11E-17    | 53.91995156 |
| HOMEZ      | NM_020834    | 157.1121358 | 14.25941734 | 1.31E-11    | 11.01813153 |
| AIFM1      | NM_145812    | 105.3230929 | 3.905759419 | 1.59E-09    | 26.96609841 |
| GPATCH8    | NM_001002909 | 129.3121358 | 5.662797766 | 3.58E-11    | 22.83537946 |
| POPI       | NM_001145860 | 248.2945215 | 9.76935788  | 1.67E-21    | 25.41564395 |
| SLC11A2    | NM_001174129 | 103.5780858 | 4.279711025 | 4.24E-09    | 24.2021214  |
| CCAR1      | NR_104262    | 118.4308251 | 5.059725352 | 3.24E-10    | 23.40657187 |
| PAAF1      | NM_001267806 | 137.0945215 | 5.225484998 | 2.05E-12    | 26.23575065 |
| CHST15     | NM_001270764 | 152.9802357 | 13.7379831  | 5.21E-11    | 11.13556733 |
| SLC25A3    | NM_002635    | 253.298925  | 17.27014029 | 3.55E-20    | 14.6668713  |
| KIF18B     | NM_001264573 | 175.9363036 | 10.77153662 | 5.19E-14    | 16.33344525 |
| KIAA0101   | NM_014736    | 131.3780858 | 7.534440955 | 9.30E-11    | 17.43700516 |
| LOC645166  | NR_027355    | 92.53630363 | 7.184567174 | 3.84E-07    | 12.87987173 |
| SDCBP2-AS1 | NR_040049    | 136.3824894 | 13.42258304 | 1.42E-09    | 10.16067391 |
| ST3GAL6    | NM_001271145 | 74.7451108  | 11.6131017  | 0.000116987 | 6.436274538 |
| S100A13    | NM_001024210 | 87.53190005 | 16.36440557 | 5.41E-05    | 5.348920232 |
| EIF4E      | NM_001130678 | 176.8088072 | 5.05212464  | 1.10E-16    | 34.99692105 |
| SLC25A17   | NR_104237    | 133.2835644 | 5.508361573 | 4.21E-12    | 24.1965896  |
| ABCB7      | NM_004299    | 79.42857143 | 1.108093862 | 5.85E-09    | 71.68036407 |
| FAM92A1    | NM_001283034 | 235.5077322 | 14.06287696 | 2.26E-18    | 16.7467676  |
| ZNF124     | NM_001297569 | 126.2132108 | 5.330836581 | 2.65E-11    | 23.67606075 |
| GJC1       | NM_005497    | 47.81761433 | 5.542984832 | 0.001140295 | 8.626690454 |
| ZSWIM7     | NM_001042698 | 251.3934465 | 7.672695613 | 1.80E-23    | 32.76468391 |
| ROPN1L-AS1 | NR_102746    | 153.1407072 | 19.24964004 | 1.00E-07    | 7.955510176 |
| DNMT3B     | NM_006892    | 88.40440358 | 10.36161975 | 6.25E-06    | 8.531909658 |
| MKL2       | NM_014048    | 79.5890429  | 3.519571877 | 2.54E-07    | 22.61327391 |
| FAM156A    | NM_001242492 | 76.49011787 | 4.443798006 | 2.23E-06    | 17.21278009 |



|              |              |             |             |             |             |
|--------------|--------------|-------------|-------------|-------------|-------------|
| UBE2D3       | NM_181890    | 80.94296087 | 8.892421783 | 9.43E-06    | 9.102465318 |
| ERICH5       | NM_001170806 | 127.2461858 | 10.2509763  | 8.50E-10    | 12.4130797  |
| TRPM6        | NM_001177310 | 50.75606789 | 4.663903715 | 0.000792461 | 10.88274351 |
| LOC441242    | NR_103527    | 135.1890429 | 8.636676034 | 3.91E-11    | 15.65290192 |
| PANX1        | NM_015368    | 139.320943  | 8.863807182 | 1.73E-11    | 15.71795732 |
| EMC1         | NM_001271428 | 114.298925  | 10.18467866 | 2.40E-08    | 11.22263439 |
| RBM7         | NM_001286045 | 92.53630363 | 4.972141044 | 5.17E-08    | 18.61095709 |
| P4HA2        | NM_001017974 | 104.4505893 | 9.832753189 | 1.47E-07    | 10.62272055 |
| DNM1L        | NM_012062    | 110.4879679 | 4.236643991 | 9.70E-10    | 26.07912493 |
| CD164        | NM_001142403 | 227.5648751 | 7.378242976 | 6.44E-22    | 30.84269193 |
| DPP3         | NM_005700    | 212.7121358 | 8.638668744 | 2.35E-18    | 24.62325413 |
| LINC00959    | NR_034125    | 159.8901179 | 4.245871579 | 4.10E-15    | 37.65778472 |
| PRKRA        | NM_001139517 | 100.4791608 | 5.090326929 | 3.51E-09    | 19.73923525 |
| MESDC2       | NM_015154    | 250.3604715 | 10.82769266 | 4.97E-22    | 23.12223659 |
| HNRNPH1      | NM_001257293 | 340.8308251 | 23.26659531 | 5.78E-26    | 14.64893426 |
| IMP4         | NM_033416    | 106.6770108 | 16.4628771  | 6.65E-06    | 6.479852228 |
| C12orf45     | NM_152318    | 146.0703536 | 10.95419148 | 2.97E-11    | 13.33465403 |
| INTS1        | NM_001080453 | 63.70332862 | 12.59691641 | 0.002613202 | 5.057057344 |
| MIER1        | NM_001146110 | 162.9890429 | 7.120380766 | 9.19E-14    | 22.89049536 |
| MCFD2        | NM_001171507 | 158.1451108 | 14.01750463 | 1.74E-11    | 11.28197315 |
| CCDC102B     | NM_001093729 | 90.47035361 | 1.532333522 | 1.68E-08    | 59.04090219 |
| UBR4         | NM_020765    | 202.7033286 | 9.474375745 | 3.63E-17    | 21.39490074 |
| G2E3         | NM_017769    | 121.3692786 | 3.53264968  | 8.63E-12    | 34.35644336 |
| ZNF596       | NM_001287256 | 110.3274965 | 12.14910946 | 1.02E-07    | 9.081117992 |
| SLC44A3      | NM_001301079 | 61.79785007 | 6.317653805 | 6.91E-05    | 9.781772154 |
| LOC100505921 | NR_110018    | 40.74726073 | 3.518784292 | 0.001180395 | 11.57992572 |
| RAD51        | NM_002875    | 150.0417822 | 4.9222172   | 2.76E-14    | 30.48256021 |
| ZNF227       | NM_001289167 | 116.3648751 | 4.082582792 | 4.32E-11    | 28.5027594  |
| POLR3E       | NM_001258035 | 189.7560679 | 9.291537707 | 1.24E-15    | 20.42246116 |
| OSGEPL1-AS1  | NR_102429    | 148.1363036 | 17.10111726 | 2.63E-09    | 8.66237576  |
| SLC45A3      | NM_033102    | 78.55606789 | 12.51176439 | 0.000171571 | 6.278576339 |
| EPAS1        | NM_001430    | 134.1560679 | 9.378461799 | 9.18E-11    | 14.30469844 |
| TYW1         | NM_018264    | 198.5714286 | 5.042310214 | 6.33E-18    | 39.38104166 |
| MFSD5        | NM_032889    | 201.6703536 | 22.04532464 | 9.32E-13    | 9.14798747  |
| ANAPC16      | NM_001242547 | 380.5451108 | 10.15885015 | 3.84E-36    | 37.45946689 |
| SLC10A7      | NM_001029998 | 108.4220179 | 1.453691928 | 2.61E-10    | 74.58390312 |
| PLEKHB2      | NR_049789    | 76.65058935 | 10.96867318 | 6.21E-05    | 6.988136857 |
| INPP5K       | NM_130766    | 92.53630363 | 11.91068897 | 9.88E-06    | 7.769181435 |
| TECPR2       | NM_014844    | 114.298925  | 7.705601876 | 7.56E-09    | 14.83322483 |
| TATDN3       | NM_001146171 | 241.3846393 | 7.231267651 | 4.11E-22    | 33.38068109 |
| FAM185A      | NR_026879    | 79.5890429  | 2.520634011 | 1.16E-07    | 31.57500953 |
| MSH6         | NM_000179    | 140.032975  | 13.04356937 | 3.67E-10    | 10.73578643 |
| S100BPB      | NM_001256121 | 68.7077322  | 7.69813521  | 8.30E-05    | 8.925243624 |
| UNC119       | NM_005148    | 225.498925  | 23.09323946 | 2.80E-15    | 9.764716008 |
| SNHG4        | NR_036536    | 155.0461858 | 27.67684124 | 3.62E-08    | 5.602018829 |
| VAT1         | NM_006373    | 96.82867515 | 18.24164047 | 5.41E-05    | 5.308112245 |
| TMBIM4       | NM_001282606 | 199.9253465 | 8.396311081 | 4.66E-17    | 23.8110933  |
| CREM         | NM_181571    | 57.8264215  | 3.289453908 | 3.75E-05    | 17.57933782 |
| DERA         | NM_001300779 | 127.2461858 | 2.676526897 | 1.96E-12    | 47.54153074 |
| BTBD8        | NM_183242    | 148.1363036 | 5.511376565 | 2.19E-13    | 26.87827658 |
| ZNF77        | NM_021217    | 118.4308251 | 10.68416478 | 1.51E-08    | 11.08470596 |
| CSNK1G3      | NM_001270574 | 91.50332862 | 2.192473501 | 1.02E-08    | 41.73520391 |
| LIFR-AS1     | NR_103553    | 89.59785007 | 3.853316647 | 1.50E-07    | 23.25213791 |
| GRAMD2       | NM_001012642 | 89.4373786  | 9.41159684  | 5.55E-06    | 9.502890967 |
| RAD52        | NM_001297422 | 250.520943  | 12.60862364 | 7.64E-21    | 19.86901585 |
| CD44         | NM_001001391 | 119.3033286 | 7.973600652 | 1.94E-09    | 14.96229042 |
| VPS11        | NM_021729    | 147.9758322 | 6.775450048 | 5.31E-13    | 21.84000046 |
| CBLL1        | NM_024814    | 99.44618576 | 10.62228292 | 3.07E-07    | 9.362035117 |
| TBCA         | NM_001297738 | 167.832975  | 5.239212599 | 2.63E-15    | 32.03400737 |
| GLMN         | NM_053274    | 295.0791608 | 3.668734649 | 2.08E-30    | 80.43077218 |
| TAB1         | NM_153497    | 141.2264215 | 8.878987395 | 7.50E-11    | 15.90569005 |
| IQUB         | NM_001282855 | 103.4176143 | 2.05940832  | 4.31E-10    | 50.21714895 |

|             |              |             |             |             |             |
|-------------|--------------|-------------|-------------|-------------|-------------|
| POLD1       | NR_046402    | 157.9846393 | 9.82303748  | 1.55E-12    | 16.08307406 |
| BTD         | NM_001281723 | 87.69237152 | 6.190467427 | 1.90E-07    | 14.16571084 |
| UBAP1       | NM_001171202 | 120.1758322 | 6.671972582 | 1.54E-09    | 18.01203927 |
| NCOA4       | NM_001145261 | 146.9428571 | 14.69292648 | 6.22E-10    | 10.00092509 |
| GUSBP4      | NR_125727    | 132.4110608 | 7.116720509 | 1.06E-11    | 18.60562891 |
| TRIAP1      | NM_016399    | 138.2879679 | 27.34975366 | 2.79E-06    | 5.056278372 |
| ABCB9       | NM_001243013 | 138.2879679 | 10.75308544 | 1.76E-10    | 12.86030588 |
| BMS1P5      | NR_003611    | 166.9604715 | 7.337111635 | 7.57E-15    | 22.7556128  |
| AIG1        | NM_001286589 | 115.1714286 | 3.602267429 | 7.75E-11    | 31.97192625 |
| KIAA0895    | NM_001199706 | 79.5890429  | 1.803424975 | 5.00E-08    | 44.13216186 |
| FAN1        | NM_001146095 | 152.9802357 | 8.692061834 | 1.68E-13    | 17.59999396 |
| RNF207      | NM_207396    | 165.9274965 | 13.97101569 | 2.81E-12    | 11.87655215 |
| EPOR        | NR_033663    | 164.8945215 | 39.14249056 | 6.00E-07    | 4.212673213 |
| GTF3C6      | NM_138408    | 126.3736822 | 10.74532002 | 1.16E-09    | 11.7608114  |
| BTG2        | NM_006763    | 339.7978501 | 31.76712556 | 5.38E-23    | 10.69652492 |
| DESI2       | NR_123735    | 248.4549929 | 6.125004668 | 8.86E-23    | 40.56404957 |
| RAD1        | NR_026591    | 160.0505893 | 6.431532334 | 4.67E-15    | 24.88529654 |
| PEMT        | NM_001267551 | 170.9319    | 7.100196467 | 1.89E-14    | 24.07424933 |
| MBOAT1      | NM_001080480 | 72.67916077 | 5.612975178 | 1.16E-05    | 12.94842013 |
| MEF2A       | NM_005587    | 152.9802357 | 3.775709465 | 7.69E-15    | 40.51695109 |
| AGTPBP1     | NM_001286717 | 105.3230929 | 2.314130753 | 5.64E-10    | 45.5130259  |
| PSMB5       | NM_001144932 | 78.87701085 | 14.56025689 | 0.000192808 | 5.417281537 |
| PSMC4       | NM_153001    | 85.6264215  | 18.18246133 | 0.000226615 | 4.7092866   |
| PEA15       | NM_001297577 | 115.3319    | 18.28261203 | 2.42E-06    | 6.308283514 |
| RPL5        | NM_000969    | 276.2549929 | 13.18110402 | 7.21E-24    | 20.95841081 |
| PPP6R2      | NM_014678    | 59.73190005 | 10.60530821 | 0.001757402 | 5.632264414 |
| ALDH5A1     | NM_170740    | 64.73630363 | 5.857487409 | 3.12E-05    | 11.05188951 |
| ZNF211      | NM_001265599 | 113.4264215 | 5.766117817 | 1.23E-10    | 19.67119388 |
| CCDC66      | NR_024460    | 93.40880717 | 3.110748265 | 4.50E-09    | 30.02776155 |
| PPA1        | NM_021129    | 216.6835644 | 6.127627501 | 1.84E-20    | 35.361739   |
| TTC4        | NM_001291333 | 255.2044036 | 7.573854167 | 1.91E-23    | 33.69544725 |
| IL6R        | NM_001206866 | 54.88796794 | 6.89474497  | 0.001370557 | 7.960840927 |
| ARAP3       | NM_022481    | 56.79344649 | 9.959485014 | 0.002539056 | 5.702448109 |
| YTHDC1      | NM_133370    | 180.7802357 | 8.795993404 | 8.85E-15    | 20.55256609 |
| ANXA7       | NM_004034    | 195.7934465 | 6.473084825 | 7.95E-18    | 30.24731666 |
| C8orf37-AS1 | NR_038201    | 266.0857143 | 1.965643119 | 1.25E-25    | 135.368273  |
| FAM49B      | NM_001256763 | 197.8593965 | 6.794467499 | 6.70E-17    | 29.12066274 |
| APLP1       | NM_001024807 | 82.52749646 | 16.69229899 | 0.000374439 | 4.944046144 |
| AMD1        | NM_001287216 | 150.2022537 | 9.175313154 | 2.04E-12    | 16.3702591  |
| LBX2        | NM_001009812 | 181.8132108 | 35.46103252 | 5.31E-09    | 5.127126816 |
| C17orf80    | NR_110105    | 81.8154644  | 12.13234665 | 4.68E-05    | 6.743581168 |
| KIF9        | NM_182902    | 74.7451108  | 8.110628824 | 2.80E-05    | 9.215698613 |
| GUSBP2      | NR_003504    | 43.84618576 | 2.269165748 | 0.000873502 | 19.32260162 |
| TCP1        | NM_030752    | 205.6417822 | 16.77059816 | 4.04E-15    | 12.26204219 |
| MAPKAP1     | NM_001006620 | 183.8791608 | 5.037513527 | 3.08E-16    | 36.50196863 |
| ZNF85       | NM_001256171 | 57.66595002 | 1.856957005 | 1.24E-05    | 31.05400388 |
| HBEGF       | NM_001945    | 296.9846393 | 12.05952903 | 3.95E-26    | 24.62655371 |
| SCNM1       | NM_024041    | 79.5890429  | 14.82808809 | 0.000243285 | 5.367451448 |
| WDR31       | NM_001012361 | 212.7121358 | 8.181371059 | 9.74E-19    | 25.99957076 |
| NMRK1       | NM_017881    | 205.6417822 | 5.641238302 | 1.33E-19    | 36.45330532 |
| PRKG2       | NM_001282480 | 58.69892504 | 2.504385607 | 1.59E-05    | 23.43845328 |
| PA2G4       | NM_006191    | 84.43297501 | 19.67524021 | 0.000553907 | 4.291331344 |
| TMEM14B     | NM_030969    | 212.5516643 | 13.15403797 | 2.40E-17    | 16.15866283 |
| STAG3L4     | NR_040586    | 257.2703536 | 7.255124319 | 7.11E-25    | 35.46050244 |
| PIK3R1      | NM_181523    | 219.6220179 | 5.978823437 | 2.11E-20    | 36.73331722 |
| FOXJ3       | NM_001198851 | 49.88356436 | 3.256495771 | 0.000287133 | 15.31817262 |
| CEP152      | NM_001194998 | 45.91213579 | 2.174346629 | 0.000436521 | 21.11537101 |
| AGPAT5      | NM_018361    | 66.80225365 | 6.436931207 | 3.47E-05    | 10.37796607 |
| EXOSC1      | NM_016046    | 90.63082508 | 10.98044549 | 4.50E-06    | 8.25383862  |
| LHX2        | NM_004789    | 98.41321075 | 8.105134915 | 1.07E-07    | 12.14208175 |
| H3F3AP4     | NR_002315    | 158.8571429 | 7.866155897 | 4.84E-14    | 20.19501583 |
| ZNF616      | NM_178523    | 177.8417822 | 5.465018568 | 1.58E-16    | 32.54184409 |

|           |              |             |             |             |             |
|-----------|--------------|-------------|-------------|-------------|-------------|
| WDR48     | NM_020839    | 74.58463932 | 5.516189095 | 4.59E-06    | 13.5210447  |
| ADIPOR2   | NM_024551    | 136.0615464 | 4.78181687  | 4.09E-12    | 28.45394337 |
| MON1A     | NM_001142501 | 159.8901179 | 13.34876744 | 1.85E-11    | 11.97789373 |
| SPECC1L   | NM_001254732 | 227.4044036 | 6.437425058 | 8.40E-21    | 35.32536713 |
| FNTA      | NR_033698    | 178.8747572 | 7.146233    | 3.21E-16    | 25.03063603 |
| CSNK1A1   | NM_001892    | 172.8373786 | 7.920531609 | 1.24E-14    | 21.82143663 |
| SUPT3H    | NM_003599    | 126.3736822 | 1.72184613  | 8.24E-12    | 73.39429466 |
| MAOA      | NM_001270458 | 36.93630363 | 2.488292431 | 0.003198099 | 14.84403648 |
| TEX2      | NM_018469    | 107.3890429 | 11.69014883 | 1.38E-07    | 9.186285344 |
| AFG3L1P   | NR_003227    | 227.5648751 | 11.57004262 | 3.91E-19    | 19.66845607 |
| ATG4D     | NM_032885    | 150.0417822 | 15.6625392  | 1.44E-10    | 9.579658846 |
| EHHADH    | NM_001166415 | 196.8264215 | 3.743971154 | 6.35E-19    | 52.57156463 |
| TMEM184B  | NM_012264    | 75.61761433 | 11.76852411 | 0.000114166 | 6.425411856 |
| ATP6V1D   | NM_015994    | 51.94951438 | 6.463134578 | 0.002125714 | 8.03782031  |
| SMAD6     | NR_027654    | 102.3846393 | 9.20120594  | 7.77E-08    | 11.12730657 |
| DTL       | NM_016448    | 85.6264215  | 4.126876173 | 3.75E-07    | 20.74848333 |
| MIPOL1    | NM_001195297 | 143.1319    | 1.800373745 | 1.23E-13    | 79.50121491 |
| POLR3F    | NM_001282526 | 138.2879679 | 6.596117369 | 2.62E-12    | 20.96505568 |
| GMNN      | NM_001251990 | 198.7319    | 9.001706963 | 4.57E-18    | 22.07713502 |
| SURF4     | NM_033161    | 100.4791608 | 18.23051976 | 1.87E-05    | 5.511590568 |
| MGST3     | NM_004528    | 92.53630363 | 9.00362571  | 2.34E-06    | 10.27767109 |
| ATP5J     | NM_001003697 | 99.44618576 | 13.22664077 | 3.51E-06    | 7.518627555 |
| NOP2      | NM_001258309 | 195.7934465 | 12.6715326  | 3.90E-16    | 15.45144164 |
| NDRG1     | NM_001135242 | 267.6001037 | 10.24421152 | 5.17E-23    | 26.12207912 |
| CCDC93    | NM_019044    | 184.9121358 | 7.614451209 | 9.84E-16    | 24.28436807 |
| TTC14     | NM_133462    | 121.2088072 | 5.468096431 | 1.60E-11    | 22.16654529 |
| UBE2H     | NM_003344    | 103.5780858 | 5.07111221  | 1.15E-08    | 20.42512205 |
| TMEM120B  | NM_001080825 | 110.3274965 | 11.81511897 | 6.71E-08    | 9.337823575 |
| GLIS3     | NM_001042413 | 36.93630363 | 2.979041381 | 0.003585917 | 12.39872123 |
| TMED3     | NM_007364    | 200.7978501 | 11.26228586 | 1.26E-16    | 17.8292269  |
| SLC9B1    | NR_047515    | 120.1758322 | 2.602382959 | 1.59E-11    | 46.17914967 |
| MARVELD3  | NM_052858    | 172.8373786 | 16.95482047 | 8.73E-12    | 10.19399638 |
| MMP28     | NM_001032278 | 118.4308251 | 7.91653301  | 3.67E-09    | 14.95993574 |
| LAMB1     | NM_002291    | 98.41321075 | 9.322427812 | 2.63E-07    | 10.55660743 |
| METTL25   | NM_032230    | 103.4176143 | 1.656958205 | 5.47E-10    | 62.41413574 |
| FKBP7     | NM_181342    | 154.0132108 | 3.929483129 | 1.66E-15    | 39.19426696 |
| MBIP      | NM_016586    | 92.37583215 | 0.33496096  | 6.49E-13    | 275.7808915 |
| CASP8     | NM_001080125 | 65.76927864 | 5.871841603 | 2.67E-05    | 11.20079237 |
| CHORDC1   | NM_012124    | 145.1978501 | 4.028365342 | 1.42E-14    | 36.04386339 |
| ADAM22    | NM_021722    | 266.2461858 | 3.379952854 | 9.64E-26    | 78.77215964 |
| DYRK4     | NM_001282285 | 99.44618576 | 5.494675405 | 4.63E-09    | 18.09864613 |
| CAPZA2    | NM_006136    | 173.8703536 | 3.64951793  | 1.25E-16    | 47.64200559 |
| EWSR1     | NM_001163287 | 82.52749646 | 10.24259034 | 1.45E-05    | 8.057287635 |
| ZNF266    | NM_006631    | 53.69452145 | 4.05723759  | 0.00025206  | 13.23425613 |
| FBXL13    | NM_001111038 | 70.77368223 | 3.344047753 | 1.86E-06    | 21.16407643 |
| CDC5L     | NM_001253    | 95.47475719 | 3.8520944   | 4.64E-08    | 24.78515511 |
| CDK5RAP2  | NR_073556    | 69.58023574 | 5.997325676 | 2.33E-05    | 11.60187715 |
| PPHLN1    | NM_201438    | 135.1890429 | 5.635119075 | 7.02E-12    | 23.99045009 |
| SERPINB8  | NM_001276490 | 148.1363036 | 11.57827328 | 3.19E-11    | 12.79433471 |
| POT1      | NR_003102    | 53.85499293 | 2.133277636 | 6.82E-05    | 25.24518705 |
| THOC5     | NM_003678    | 203.7363036 | 5.626327932 | 2.16E-18    | 36.21123868 |
| DSTN      | NM_006870    | 93.56927864 | 5.592759661 | 4.13E-08    | 16.73043083 |
| CCNT2-AS1 | NR_036549    | 72.5186893  | 3.927194297 | 7.96E-06    | 18.46577577 |
| ANKS3     | NR_040252    | 125.3407072 | 9.561945342 | 1.97E-09    | 13.10828526 |
| BRF2      | NM_018310    | 173.1583215 | 16.23170182 | 2.49E-12    | 10.66790922 |
| SEPW1     | NM_003009    | 167.120943  | 24.52896877 | 1.05E-09    | 6.813207049 |
| UFM1      | NM_001286704 | 81.49452145 | 0.968160592 | 1.67E-10    | 84.17459059 |
| MROH8     | NM_152503    | 128.1186893 | 6.208538437 | 3.02E-11    | 20.63588566 |
| TAZ       | NM_000116    | 80.62201792 | 10.44509588 | 1.43E-05    | 7.718647955 |
| SYPL1     | NM_182715    | 60.76487506 | 2.311199183 | 5.78E-06    | 26.2914921  |
| C11orf74  | NM_001276725 | 118.2703536 | 3.307875896 | 1.75E-11    | 35.75416893 |
| WSB1      | NM_134265    | 340.6703536 | 9.957244438 | 2.07E-31    | 34.21331632 |

|              |              |             |             |             |             |
|--------------|--------------|-------------|-------------|-------------|-------------|
| ILDR1        | NM_175924    | 182.6857143 | 7.001879428 | 2.48E-16    | 26.09095403 |
| CHEK1        | NR_045204    | 74.7451108  | 7.04633357  | 2.18E-05    | 10.60766001 |
| PLEKHG4      | NM_001129731 | 91.6638001  | 12.75521791 | 5.26E-06    | 7.186376645 |
| YTHDF3       | NM_001277817 | 162.1165394 | 4.755448931 | 2.32E-15    | 34.09069085 |
| TRIM52-AS1   | NR_102762    | 99.44618576 | 22.87273292 | 0.000128577 | 4.347805141 |
| RAB31P       | NM_175624    | 118.2703536 | 3.765515035 | 2.84E-11    | 31.40881194 |
| BICD2        | NM_015250    | 51.94951438 | 7.566762774 | 0.002647881 | 6.865487386 |
| ABLIM3       | NM_001301027 | 48.85058935 | 6.531718173 | 0.001414009 | 7.478979963 |
| TNFRSF10B    | NR_027140    | 170.0593965 | 9.892328696 | 1.05E-13    | 17.1910378  |
| SEC61A2      | NM_001142627 | 160.0505893 | 6.613125313 | 7.43E-14    | 24.20195925 |
| RGL3         | NM_001161616 | 149.0088072 | 12.96698521 | 5.96E-11    | 11.49139949 |
| KAT7         | NM_001199157 | 199.9253465 | 12.10080665 | 1.21E-15    | 16.52165449 |
| DCP2         | NM_001242377 | 233.4417822 | 5.119542724 | 4.91E-23    | 45.59817054 |
| ARMC7        | NM_024585    | 186.8176143 | 31.1602877  | 7.78E-10    | 5.995375143 |
| SLC39A6      | NM_001099406 | 116.3648751 | 6.025610116 | 4.06E-10    | 19.31171662 |
| GATC         | NM_176818    | 129.3121358 | 18.06233211 | 7.25E-08    | 7.15921593  |
| ASAH1        | NM_004315    | 91.50332862 | 13.00210235 | 1.17E-05    | 7.037579472 |
| MYO19        | NM_001163735 | 125.3407072 | 19.52941277 | 2.32E-07    | 6.418047931 |
| TMBIM6       | NM_001098576 | 124.3077322 | 8.493455804 | 9.20E-10    | 14.63570719 |
| FOXRED1      | NR_037647    | 96.5077322  | 16.58635626 | 2.04E-05    | 5.818501104 |
| USP15        | NM_001252079 | 124.3077322 | 3.075620012 | 2.41E-12    | 40.41712947 |
| ANKRD31      | NM_001164443 | 80.46154644 | 2.106138517 | 2.04E-07    | 38.20334978 |
| PTPRF        | NM_130440    | 60.60440358 | 9.685121412 | 0.000550041 | 6.257474842 |
| VPS72        | NM_001271087 | 155.0461858 | 9.540688272 | 2.26E-12    | 16.25104828 |
| FSIP1        | NM_152597    | 83.56047148 | 2.304508019 | 1.13E-07    | 36.25957072 |
| ZNF271       | NR_024566    | 156.0791608 | 8.207567944 | 3.64E-13    | 19.01649329 |
| GFOD2        | NM_030819    | 139.1604715 | 7.595705755 | 1.21E-11    | 18.32094027 |
| TXNL4B       | NM_001142317 | 64.73630363 | 11.70961452 | 0.000952205 | 5.528474358 |
| ZNF526       | NM_133444    | 159.0176143 | 16.17219421 | 5.07E-11    | 9.83277917  |
| CST3         | NM_000099    | 207.5472607 | 18.77746369 | 1.09E-14    | 11.05299758 |
| NXPE3        | NM_001134456 | 121.3692786 | 5.794219192 | 1.29E-10    | 20.946615   |
| PHF19        | NR_104601    | 54.72749646 | 11.12616479 | 0.003649929 | 4.918810523 |
| YEATS4       | NM_006530    | 197.8593965 | 3.356101547 | 1.67E-20    | 58.95512807 |
| UBE2J1       | NM_016021    | 114.298925  | 2.952278054 | 4.64E-11    | 38.71550137 |
| YKT6         | NM_006555    | 249.4879679 | 10.04135619 | 4.36E-22    | 24.84604302 |
| FABP5        | NM_001444    | 209.7736822 | 27.71873817 | 3.44E-12    | 7.56793765  |
| ZNF143       | NM_001282656 | 181.8132108 | 6.870693542 | 9.85E-16    | 26.46213365 |
| TUG1         | NR_002323    | 73.71213579 | 15.67239975 | 0.000638275 | 4.703308808 |
| FAM210A      | NM_152352    | 125.3407072 | 3.802762116 | 2.72E-11    | 32.96043859 |
| ADAM10       | NM_001110    | 90.63082508 | 2.973666369 | 1.59E-08    | 30.47780546 |
| C16orf59     | NM_025108    | 74.58463932 | 16.25805403 | 0.000971209 | 4.587550218 |
| TRAPPC12     | NM_016030    | 264.3407072 | 8.864005633 | 2.08E-23    | 29.82181174 |
| ZNF16        | NM_006958    | 55.76047148 | 8.292909919 | 0.000706546 | 6.723872804 |
| GATAD2A      | NM_017660    | 54.72749646 | 8.674976552 | 0.001666969 | 6.308662177 |
| RNF128       | NM_194463    | 84.43297501 | 1.549013284 | 1.88E-08    | 54.50758615 |
| GBF1         | NM_001199378 | 277.1274965 | 11.4616272  | 4.16E-23    | 24.17872188 |
| MLF2         | NM_005439    | 165.9274965 | 14.59380603 | 5.16E-12    | 11.36972056 |
| ADAMTS17     | NM_139057    | 176.8088072 | 4.213694971 | 1.19E-15    | 41.96051409 |
| RPA1         | NM_002945    | 151.9472607 | 5.313019451 | 1.10E-13    | 28.59904093 |
| EIF3L        | NM_001242923 | 161.2440358 | 11.2185129  | 1.23E-12    | 14.37303119 |
| SGCE         | NM_003919    | 52.66154644 | 2.23264635  | 0.000116657 | 23.58705239 |
| THEGL        | NM_001256475 | 140.032975  | 2.825481753 | 5.25E-14    | 49.560743   |
| TMCO6        | NM_018502    | 165.0549929 | 18.43097744 | 3.19E-11    | 8.955303291 |
| TRIM3        | NM_001248006 | 143.1319    | 11.31832088 | 1.80E-10    | 12.6460366  |
| DHFRL1       | NM_176815    | 129.3121358 | 12.25331851 | 2.46E-09    | 10.55323386 |
| GAR1         | NM_032993    | 62.83082508 | 8.870612793 | 0.000479486 | 7.083030964 |
| C3orf18      | NM_001171740 | 79.5890429  | 8.940814733 | 1.15E-05    | 8.901766258 |
| DKAKD        | NM_001288654 | 61.79785007 | 14.1937612  | 0.002693152 | 4.353874158 |
| LOC100287036 | NM_001242885 | 64.73630363 | 13.64139047 | 0.001455396 | 4.74557955  |
| SMYD3        | NM_001167740 | 233.4417822 | 3.499134765 | 3.59E-22    | 66.71414446 |
| LAS1L        | NM_031206    | 93.40880717 | 4.284365793 | 1.44E-08    | 21.80224838 |
| ULK2         | NM_001142610 | 73.71213579 | 4.602746554 | 5.79E-06    | 16.01481527 |

|              |              |             |             |             |             |
|--------------|--------------|-------------|-------------|-------------|-------------|
| SDHC         | NM_001035513 | 194.920943  | 8.762537468 | 5.30E-16    | 22.24480565 |
| LOC100507634 | NR_038320    | 200.7978501 | 19.08153912 | 3.10E-13    | 10.52314747 |
| BTF3         | NM_001207    | 153.1407072 | 4.446918177 | 3.95E-16    | 34.43749156 |
| FAM174A      | NM_198507    | 116.3648751 | 2.388258638 | 6.32E-12    | 48.72373253 |
| HPS1         | NM_182639    | 233.6022537 | 14.19364928 | 4.61E-19    | 16.4582236  |
| CEP350       | NM_014810    | 181.9736822 | 3.541671647 | 9.50E-18    | 51.38073214 |
| MOB4         | NM_001204094 | 90.47035361 | 3.502919202 | 4.82E-08    | 25.82713114 |
| CCDC90B      | NM_001286120 | 144.1648751 | 6.955502902 | 2.31E-12    | 20.72673638 |
| NDUFB3       | NM_001257102 | 266.2461858 | 10.12121486 | 6.52E-24    | 26.30575376 |
| SNX7         | NM_152238    | 140.1934465 | 2.733944725 | 8.69E-14    | 51.27881525 |
| NUDT3        | NM_006703    | 53.69452145 | 5.388266929 | 0.000428985 | 9.965081938 |
| DYNC1H1      | NM_001376    | 321.8461858 | 8.591164007 | 3.15E-29    | 37.46246556 |
| SCAMP1       | NM_001290229 | 133.1230929 | 3.135933394 | 5.62E-13    | 42.45086746 |
| AGO3         | NM_177422    | 153.1407072 | 4.882354343 | 1.02E-13    | 31.36615994 |
| RRAGC        | NM_001271851 | 52.82201792 | 5.295446393 | 0.000528222 | 9.974988697 |
| LOC100505666 | NR_040772    | 192.6945215 | 8.964908178 | 3.58E-17    | 21.49431066 |
| TRAPPC6A     | NM_024108    | 50.75606789 | 8.813017786 | 0.002079115 | 5.759215416 |
| DHRS7        | NM_016029    | 196.66595   | 9.512242396 | 2.99E-17    | 20.67503558 |
| NUPL1        | NM_014089    | 131.2176143 | 7.115580737 | 7.12E-11    | 18.44088616 |
| RPN2         | NM_002951    | 127.2461858 | 9.446826441 | 1.54E-09    | 13.46972833 |
| PALD1        | NM_014431    | 85.46595002 | 9.248767391 | 3.01E-06    | 9.240793546 |
| PTPMT1       | NM_001143984 | 82.52749646 | 11.3684519  | 2.34E-05    | 7.259343416 |
| RRM2B        | NM_015713    | 127.2461858 | 7.730273684 | 1.22E-10    | 16.46076077 |
| UTP18        | NM_016001    | 177.1297501 | 7.542921685 | 1.41E-15    | 23.48290988 |
| MCPH1        | NM_001172574 | 99.44618576 | 4.461710203 | 9.04E-09    | 22.28880435 |
| RAD54L       | NM_003579    | 136.0615464 | 14.52930426 | 4.47E-09    | 9.364629164 |
| SLC25A5      | NM_001152    | 152.1077322 | 21.80013172 | 1.56E-08    | 6.97737675  |
| ECI2         | NR_028588    | 146.0703536 | 3.828999167 | 6.57E-15    | 38.14844225 |
| GPR107       | NM_001136557 | 229.6308251 | 7.474480846 | 5.20E-20    | 30.72197653 |
| ARF5         | NM_001662    | 137.2549929 | 34.26747591 | 2.33E-05    | 4.00540131  |
| TIPRL        | NM_001031800 | 119.3033286 | 8.911955415 | 1.43E-09    | 13.38688571 |
| CCDC134      | NM_024821    | 255.3648751 | 12.15570104 | 1.30E-21    | 21.00782788 |
| FBXL20       | NM_032875    | 137.0945215 | 4.701725217 | 5.64E-12    | 29.15834404 |
| CUL3         | NM_001257197 | 68.54726073 | 5.076518836 | 2.12E-05    | 13.50280831 |
| MLKL         | NM_152649    | 165.0549929 | 8.829620348 | 1.30E-13    | 18.69332841 |
| BIVM         | NM_017693    | 45.03963225 | 5.799425218 | 0.002229898 | 7.766223472 |
| FPGS         | NR_110170    | 142.098925  | 13.75055874 | 2.60E-10    | 10.33404734 |
| ZDHHC20      | NM_153251    | 190.7890429 | 2.957935616 | 2.23E-19    | 64.50074231 |
| CHD2         | NM_001042572 | 227.5648751 | 9.768460992 | 2.52E-19    | 23.29587795 |
| PPL          | NM_002705    | 89.4373786  | 11.32190939 | 6.71E-06    | 7.899496061 |
| GIGYF2       | NM_001103148 | 172.8373786 | 5.209463832 | 2.84E-15    | 33.17757531 |
| POLR2K       | NM_005034    | 128.4396323 | 7.49375329  | 5.37E-11    | 17.13955975 |
| SNX15        | NM_013306    | 124.3077322 | 7.820243359 | 2.41E-10    | 15.89563476 |
| ISL2         | NM_145805    | 156.9516643 | 9.860196078 | 8.17E-13    | 15.91770215 |
| SZT2         | NM_015284    | 202.7033286 | 12.28881643 | 1.29E-15    | 16.49494316 |
| ARSA         | NM_001085428 | 109.2945215 | 17.55394418 | 3.00E-06    | 6.226208784 |
| LOC100288798 | NR_125379    | 158.1451108 | 3.633588944 | 6.24E-15    | 43.52311536 |
| C16orf46     | NM_152337    | 191.8220179 | 9.133920693 | 3.02E-16    | 21.00106015 |
| CLRN1        | NM_001256819 | 36.77583215 | 2.842207567 | 0.002899751 | 12.93917889 |
| EFCAB5       | NM_001145053 | 85.46595002 | 2.845476665 | 5.75E-08    | 30.03572339 |
| CNOT8        | NM_001301083 | 140.1934465 | 9.041266699 | 2.34E-11    | 15.50595189 |
| KMT2C        | NM_170606    | 99.28571429 | 3.422366018 | 2.95E-09    | 29.01084038 |
| TSPYL1       | NM_003309    | 79.5890429  | 17.29918444 | 0.000912973 | 4.600739601 |
| FAM195B      | NM_207368    | 67.67475719 | 15.08820072 | 0.001846364 | 4.485276835 |
| ST6GALNAC2   | NM_006456    | 130.3451108 | 30.08005146 | 5.32E-06    | 4.333274196 |
| SF3A2        | NM_007165    | 153.1407072 | 14.95513098 | 1.15E-10    | 10.2400111  |
| GGCT         | NM_001199816 | 134.3165394 | 8.222154716 | 3.70E-11    | 16.33592945 |
| GPR155       | NM_001033045 | 80.62201792 | 5.051181535 | 1.36E-06    | 15.96102167 |
| ARHGAP5      | NM_001173    | 80.46154644 | 1.756360837 | 1.11E-07    | 45.8115125  |
| TUT1         | NM_022830    | 173.8703536 | 17.15904321 | 3.74E-12    | 10.13286997 |
| RPL22L1      | NM_001099645 | 276.2549929 | 36.01032977 | 2.66E-16    | 7.671548544 |
| UNK          | NM_001080419 | 189.7560679 | 13.21774866 | 1.75E-14    | 14.35615647 |

|                |              |             |             |             |             |
|----------------|--------------|-------------|-------------|-------------|-------------|
| RRM2           | NM_001165931 | 132.2505893 | 22.27813009 | 2.54E-07    | 5.936341551 |
| ZFP37          | NM_001282518 | 73.71213579 | 4.97576115  | 1.61E-06    | 14.8142432  |
| NELFCD         | NM_198976    | 72.5186893  | 11.05483465 | 0.000123404 | 6.559907189 |
| TMEM135        | NM_001168724 | 122.4022537 | 2.5867392   | 1.42E-11    | 47.31913201 |
| COMMD8         | NM_017845    | 215.6505893 | 3.357580319 | 1.46E-24    | 64.22797636 |
| TWF2           | NM_007284    | 156.9516643 | 12.62159337 | 5.80E-12    | 12.4351704  |
| DCAF10         | NM_001286810 | 272.2835644 | 5.732935411 | 4.00E-26    | 47.49461573 |
| EPHA2          | NM_004431    | 145.1978501 | 16.82327231 | 8.75E-10    | 8.630773335 |
| TNS4           | NM_032865    | 181.8132108 | 17.7344675  | 1.34E-12    | 10.25196898 |
| ZNF430         | NM_001172671 | 233.4417822 | 3.632745877 | 3.46E-24    | 64.26042175 |
| ERCC6L         | NM_017669    | 67.51428571 | 5.782791354 | 1.49E-05    | 11.67503401 |
| LINC01420      | NR_015367    | 117.2373786 | 3.508788677 | 2.77E-11    | 33.41249342 |
| ZNF283         | NM_001297752 | 35.90332862 | 3.015539093 | 0.002319847 | 11.90610618 |
| EDC3           | NM_001142444 | 82.68796794 | 7.274583439 | 4.76E-06    | 11.36669455 |
| PRKCI          | NM_002740    | 107.3890429 | 4.681829711 | 2.48E-09    | 22.93740899 |
| ZNF628         | NM_033113    | 89.4373786  | 9.81220597  | 5.39E-06    | 9.114910436 |
| BSG            | NM_198589    | 122.4022537 | 15.25729974 | 1.11E-07    | 8.022537129 |
| ATF7           | NR_073163    | 136.3824894 | 5.767119421 | 5.56E-12    | 23.64828599 |
| PRCC           | NM_005973    | 72.67916077 | 6.968892479 | 4.05E-05    | 10.42908339 |
| CDC25A         | NM_201567    | 112.3934465 | 7.51428921  | 5.49E-09    | 14.95729581 |
| KIAA1841       | NM_001129993 | 111.520943  | 4.267498943 | 8.53E-10    | 26.13262345 |
| C18orf25       | NM_001008239 | 150.0417822 | 5.013248368 | 1.49E-13    | 29.92905421 |
| ADAM17         | NM_003183    | 100.4791608 | 6.472589405 | 1.85E-08    | 15.5237965  |
| IKZF5          | NR_073479    | 147.1033286 | 5.244194292 | 1.46E-13    | 28.05070149 |
| HYAL3          | NM_001200031 | 173.8703536 | 31.888782   | 1.13E-08    | 5.452398702 |
| ZNF664-FAM101A | NM_001204299 | 49.72309288 | 6.282247432 | 0.001473264 | 7.914857448 |
| WDR27          | NM_001202550 | 174.9033286 | 2.370485434 | 7.29E-17    | 73.78376012 |
| FUT4           | NM_002033    | 193.8879679 | 17.13030303 | 8.86E-14    | 11.31842021 |
| CNPY3          | NM_006586    | 82.52749646 | 17.27820629 | 0.000357912 | 4.776392587 |
| TTC31          | NM_022492    | 87.53190005 | 10.21916981 | 2.31E-06    | 8.565460957 |
| DHCR7          | NM_001360    | 62.83082508 | 8.27510055  | 0.000176285 | 7.592756693 |
| CETN2          | NM_004344    | 62.67035361 | 4.797520008 | 4.82E-05    | 13.0630729  |
| GTF2H2C        | NM_001098728 | 189.9165394 | 3.387605201 | 2.43E-19    | 56.06218201 |
| SP110          | NM_004510    | 97.54070721 | 4.578900947 | 1.98E-08    | 21.30220949 |
| PYGL           | NM_002863    | 261.2417822 | 7.139605661 | 2.27E-24    | 36.59050577 |
| OXA1L          | NM_005015    | 142.098925  | 16.91026053 | 3.52E-09    | 8.403118617 |
| DCTN6          | NM_006571    | 56.63297501 | 5.826293679 | 0.000173247 | 9.720240367 |
| LOC100289230   | NR_036530    | 215.4901179 | 36.13287862 | 4.00E-10    | 5.9638237   |
| XPC            | NM_001145769 | 247.4220179 | 11.89266428 | 1.24E-20    | 20.80459115 |
| TSNAX-DISC1    | NR_028396    | 167.120943  | 5.355769384 | 1.46E-14    | 31.20390946 |
| DISP2          | NM_033510    | 63.70332862 | 10.3276475  | 0.000651609 | 6.168232274 |
| ELP2           | NM_001242878 | 165.9274965 | 4.619214543 | 1.09E-15    | 35.92114957 |
| HOXB13         | NM_006361    | 128.2791608 | 16.34809523 | 3.81E-08    | 7.846734371 |
| LOC100507557   | NR_038244    | 55.76047148 | 2.616177566 | 3.28E-05    | 21.31371823 |
| ZNF586         | NM_001204814 | 57.66595002 | 8.515889493 | 0.001711527 | 6.771570964 |
| ZNF12          | NM_016265    | 50.04403583 | 8.481178763 | 0.002185146 | 5.900599107 |
| ULK3           | NM_001284365 | 142.098925  | 13.85909995 | 3.29E-10    | 10.25311352 |
| SGOL2          | NM_001160046 | 95.47475719 | 1.970030331 | 1.97E-09    | 48.46359759 |
| AAMDC          | NM_024684    | 220.4945215 | 6.211556538 | 6.67E-20    | 35.49746671 |
| DOLK           | NM_014908    | 230.5033286 | 39.83956719 | 3.90E-11    | 5.785788974 |
| CD46           | NM_172353    | 132.2505893 | 4.909987011 | 5.63E-12    | 26.93501817 |
| LTK            | NM_002344    | 58.85939651 | 9.187333636 | 0.000957444 | 6.406580935 |
| COL6A4P1       | NR_027927    | 100.4791608 | 3.751654199 | 7.17E-09    | 26.78262853 |
| BBS12          | NM_001178007 | 76.65058935 | 7.977322496 | 5.93E-06    | 9.608560941 |
| CDKN3          | NM_001130851 | 278.1604715 | 9.348456121 | 7.54E-25    | 29.75469616 |
| PASK           | NM_001252124 | 91.6638001  | 7.330574321 | 5.62E-07    | 12.50431359 |
| ELK1           | NM_001257168 | 121.2088072 | 6.869916233 | 1.68E-10    | 17.6434185  |
| TMEM67         | NR_024522    | 109.6154644 | 4.219055338 | 1.83E-09    | 25.98104448 |
| AMN1           | NM_001278412 | 72.67916077 | 5.474506141 | 9.70E-06    | 13.27593008 |
| BABAM1         | NM_014173    | 155.0461858 | 14.90764446 | 1.17E-10    | 10.40044832 |
| WFS1           | NM_001145853 | 190.7890429 | 10.21179199 | 5.99E-16    | 18.68320889 |
| PSMD10         | NM_170750    | 71.64618576 | 5.608101642 | 7.12E-06    | 12.77547918 |

|              |              |             |             |             |             |
|--------------|--------------|-------------|-------------|-------------|-------------|
| TNFAIP3      | NM_006290    | 123.2747572 | 7.223153486 | 1.06E-10    | 17.06661189 |
| TRMU         | NR_104241    | 235.3472607 | 17.47411508 | 1.14E-17    | 13.46833643 |
| TMEM127      | NM_001193304 | 138.1274965 | 11.76547095 | 3.06E-10    | 11.74007373 |
| COMMD6       | NM_001287393 | 153.1407072 | 6.604215008 | 6.62E-14    | 23.18832852 |
| TRAF3IP2-AS1 | NR_034108    | 157.1121358 | 5.725713565 | 5.86E-14    | 27.43974773 |
| ZDHHC13      | NM_019028    | 178.8747572 | 3.823651349 | 3.86E-17    | 46.78113689 |
| AZI2         | NM_022461    | 159.1780858 | 6.016924134 | 2.08E-14    | 26.45505947 |
| FAM86B3P     | NR_024363    | 144.1648751 | 11.72708193 | 1.87E-10    | 12.29332889 |
| CTNNB1       | NM_001098209 | 239.4791608 | 6.712126672 | 3.06E-22    | 35.67858184 |
| TRIM11       | NM_145214    | 95.31428571 | 13.26321803 | 3.95E-06    | 7.186361976 |
| SLC12A7      | NM_006598    | 119.3033286 | 9.481222885 | 9.53E-09    | 12.58311613 |
| STAG3L5P     | NR_103720    | 264.1802357 | 7.427321718 | 2.45E-26    | 35.56870777 |
| DUSP2        | NM_004418    | 160.9230929 | 22.18790783 | 5.35E-09    | 7.252738478 |
| NEK1         | NM_001199399 | 246.3890429 | 2.798335804 | 4.27E-24    | 88.04841882 |
| ABCC5        | NM_001023587 | 156.9516643 | 6.581940633 | 1.02E-13    | 23.8458037  |
| GOLGA2P10    | NR_103496    | 79.42857143 | 13.08139382 | 0.000116913 | 6.071873724 |
| SERINC5      | NM_178276    | 218.5890429 | 6.34428654  | 5.46E-20    | 34.45447199 |
| UNC5B        | NM_170744    | 75.61761433 | 9.282055963 | 3.18E-05    | 8.14664495  |
| NFU1         | NR_045631    | 184.7516643 | 5.846031977 | 1.20E-16    | 31.60291716 |
| SENP7        | NM_001282804 | 48.85058935 | 2.047110289 | 0.000264331 | 23.8631937  |
| SENP6        | NM_015571    | 190.7890429 | 3.391051207 | 6.65E-19    | 56.26250718 |
| ALDH7A1      | NM_001201377 | 171.8044036 | 5.620232166 | 6.54E-16    | 30.56891575 |
| TAOK3        | NM_016281    | 150.0417822 | 2.436384793 | 1.43E-14    | 61.58377881 |
| KXD1         | NM_001171948 | 60.76487506 | 13.88823261 | 0.003446087 | 4.375277745 |
| SPATA6       | NM_019073    | 126.2132108 | 1.57501444  | 3.08E-12    | 80.1346372  |
| CACNB1       | NM_000723    | 170.7714286 | 8.658513486 | 2.01E-14    | 19.72295    |
| WLS          | NM_001193334 | 158.1451108 | 6.216508048 | 5.74E-14    | 25.43954091 |
| C3orf33      | NM_173657    | 111.3604715 | 1.773195221 | 9.38E-12    | 62.80214955 |
| TSPAN17      | NM_001006616 | 106.3560679 | 15.64868421 | 1.33E-06    | 6.796486304 |
| CTSB         | NM_147780    | 216.5230929 | 12.40822965 | 8.77E-18    | 17.44995853 |
| ZNF786       | NM_152411    | 209.7736822 | 14.4726907  | 3.67E-16    | 14.49444934 |
| FDX1L        | NM_001031734 | 149.0088072 | 14.99835164 | 2.15E-10    | 9.935012246 |
| NMI          | NM_004688    | 64.73630363 | 3.112868426 | 1.58E-06    | 20.79635075 |
| AP1G2        | NM_001282475 | 104.4505893 | 25.88568779 | 9.79E-05    | 4.035071048 |
| ECE2         | NM_032331    | 110.3274965 | 18.58855023 | 3.91E-06    | 5.93523944  |
| RMND1        | NM_001271937 | 172.9978501 | 7.626595313 | 4.65E-15    | 22.68349676 |
| GLG1         | NR_027265    | 272.2835644 | 6.31993509  | 5.65E-25    | 43.08328495 |
| SENP5        | NM_152699    | 135.1890429 | 7.186496986 | 6.34E-11    | 18.81153546 |
| BBX          | NM_001276286 | 104.4505893 | 2.431149749 | 7.04E-10    | 42.96345357 |
| MTHFSD       | NM_022764    | 150.0417822 | 14.79492486 | 1.80E-10    | 10.14143591 |
| ARHGAP22     | NR_045675    | 47.81761433 | 7.422780826 | 0.004947143 | 6.442008117 |
| TRIM44       | NM_017583    | 114.4593965 | 3.689265141 | 8.51E-11    | 31.02498523 |
| RHOBTB3      | NM_014899    | 65.76927864 | 3.868684118 | 4.98E-06    | 17.00042615 |
| ZFP36        | NM_003407    | 318.7472607 | 57.51607399 | 8.34E-15    | 5.541881401 |
| TAMM41       | NM_001284401 | 169.0264215 | 5.691138705 | 1.49E-15    | 29.69993006 |
| OSTF1        | NM_012383    | 258.3033286 | 5.288594133 | 5.50E-25    | 48.84158665 |
| HMGXB3       | NM_014983    | 151.0747572 | 8.806878918 | 1.30E-12    | 17.15417671 |
| AJUBA        | NM_001289097 | 180.9407072 | 27.88414249 | 5.35E-10    | 6.489018168 |
| CREB3L2      | NM_001253775 | 89.59785007 | 6.556115365 | 2.70E-07    | 13.66630163 |
| LOC101927027 | NR_110205    | 143.1319    | 8.201287673 | 1.17E-11    | 17.45236916 |
| ALG8         | NM_001007027 | 92.69677511 | 7.245469081 | 5.86E-07    | 12.7937576  |
| DOCK4        | NM_014705    | 134.3165394 | 2.295448302 | 1.24E-12    | 58.51429511 |
| PLA2G4C      | NM_001159323 | 154.0132108 | 5.748808513 | 5.43E-14    | 26.79045761 |
| E2F2         | NM_004091    | 81.65499293 | 14.92553533 | 0.000188155 | 5.470825075 |
| AP1B1        | NM_001166019 | 161.0835644 | 10.48380552 | 1.83E-12    | 15.36498975 |
| SFR1         | NM_001002759 | 305.9604715 | 13.06379317 | 1.70E-27    | 23.42049261 |
| ZSCAN31      | NM_001243242 | 129.3121358 | 13.50571001 | 7.17E-09    | 9.574627009 |
| ZNF302       | NM_018675    | 164.0220179 | 9.086098111 | 3.23E-14    | 18.05197522 |
| CDK10        | NR_027702    | 310.252843  | 56.14146108 | 4.60E-15    | 5.526269481 |
| ACBD7        | NM_001039844 | 103.5780858 | 5.10141388  | 4.99E-09    | 20.30379974 |
| TMEM173      | NM_198282    | 73.71213579 | 15.87549374 | 0.001318093 | 4.643139734 |
| SFI1         | NM_014775    | 160.0505893 | 7.947466126 | 3.61E-13    | 20.13856829 |

|              |              |             |             |             |             |
|--------------|--------------|-------------|-------------|-------------|-------------|
| PTPN23       | NM_015466    | 307.86595   | 10.98857084 | 5.09E-27    | 28.01692364 |
| PYCR2        | NM_001271681 | 223.5934465 | 22.99399868 | 4.23E-15    | 9.723991447 |
| TCEANC2      | NM_153035    | 52.66154644 | 5.73721232  | 0.00068906  | 9.178943276 |
| MROH1        | NM_001099280 | 126.3736822 | 9.90807951  | 3.00E-09    | 12.75460922 |
| MGST2        | NM_002413    | 86.49892504 | 5.669543738 | 3.12E-07    | 15.25677004 |
| VEGFA        | NM_001171627 | 303.8945215 | 20.1249269  | 3.16E-23    | 15.10040374 |
| YME1L1       | NM_014263    | 149.3297501 | 6.660497662 | 1.36E-12    | 22.42020907 |
| DDX54        | NM_024072    | 220.4945215 | 10.07622966 | 4.24E-19    | 21.88264152 |
| WDHD1        | NM_001008396 | 179.7472607 | 3.510309273 | 6.10E-18    | 51.20553397 |
| ORC3         | NM_012381    | 111.520943  | 5.241686722 | 1.32E-09    | 21.27577417 |
| SLC9A8       | NM_001260491 | 116.3648751 | 7.696235631 | 3.29E-09    | 15.11971315 |
| RALGPS2      | NM_152663    | 90.47035361 | 2.331835208 | 1.59E-08    | 38.79791904 |
| JMJD1C       | NM_001282948 | 135.1890429 | 4.633318283 | 8.02E-12    | 29.17758605 |
| ZFP64        | NM_018197    | 156.0791608 | 7.073461605 | 1.70E-13    | 22.0654567  |
| SH3GLB1      | NM_001206653 | 183.8791608 | 2.510174837 | 7.07E-20    | 73.25352723 |
| CSTF3        | NM_001033506 | 131.2176143 | 6.093302802 | 1.38E-11    | 21.53472732 |
| DENND4C      | NM_017925    | 116.3648751 | 4.387302613 | 4.77E-10    | 26.52310208 |
| TMEM123      | NM_052932    | 113.26595   | 6.625893005 | 4.50E-09    | 17.09444296 |
| TIMM8A       | NM_001145951 | 145.0373786 | 16.44785997 | 4.86E-06    | 8.818009082 |
| AREL1        | NM_001039479 | 141.2264215 | 5.302747279 | 1.08E-12    | 26.63268945 |
| FBXO21       | NM_015002    | 220.6549929 | 10.0680973  | 1.71E-18    | 21.91625552 |
| SUCLG2       | NM_001177599 | 107.3890429 | 3.933907178 | 4.33E-10    | 27.29831642 |
| NME6         | NM_005793    | 191.8220179 | 14.61088829 | 1.09E-14    | 13.12870334 |
| KDM1B        | NM_153042    | 63.70332862 | 8.309470832 | 0.000298247 | 7.666352035 |
| SF3B5        | NM_031287    | 204.6088072 | 10.65108093 | 6.87E-11    | 19.21014481 |
| SPRY4        | NM_030964    | 266.2461858 | 13.38190402 | 4.02E-22    | 19.8959868  |
| HPS5         | NM_007216    | 185.9451108 | 6.274627655 | 1.66E-16    | 29.63444542 |
| ZKSCAN1      | NM_001287054 | 78.55606789 | 7.917418372 | 1.11E-05    | 9.921929624 |
| LOC100630923 | NR_038967    | 130.3451108 | 13.65454422 | 5.04E-09    | 9.545914438 |
| ZNF180       | NM_001288759 | 161.0835644 | 9.630121339 | 4.75E-13    | 16.72705449 |
| MARS         | NM_004990    | 80.62201792 | 14.71099302 | 0.000113193 | 5.480392643 |
| ZER1         | NM_006336    | 145.0373786 | 11.5331985  | 3.22E-11    | 12.57564227 |
| AP3S2        | NR_037582    | 165.9274965 | 8.627030372 | 6.11E-14    | 19.23344295 |
| RPARP-AS1    | NR_038937    | 188.8835644 | 38.81346188 | 7.40E-09    | 4.866444661 |
| TARS2        | NR_073514    | 192.8549929 | 11.81714451 | 1.64E-15    | 16.31993184 |
| PPM1J        | NM_005167    | 156.9516643 | 14.20009218 | 1.44E-11    | 11.05286236 |
| SSBP1        | NR_046269    | 183.0066572 | 6.213894871 | 1.39E-17    | 29.45119946 |
| FRS2         | NM_001278355 | 182.8461858 | 4.63258777  | 1.13E-16    | 39.46955672 |
| PREPL        | NM_001171606 | 183.7186893 | 5.188527913 | 1.92E-17    | 35.40863466 |
| EXOSC2       | NM_001282708 | 159.0176143 | 14.21731245 | 2.33E-11    | 11.1847872  |
| KLC2         | NM_022822    | 160.9230929 | 28.04983709 | 1.33E-08    | 5.737041978 |
| GGA3         | NM_001291641 | 145.3583215 | 20.5545593  | 1.28E-08    | 7.071828659 |
| ZRANB3       | NM_001286568 | 70.61321075 | 2.777501158 | 1.87E-06    | 25.4232876  |
| MKS1         | NM_017777    | 198.7319    | 10.98431267 | 2.43E-16    | 18.09233823 |
| FH           | NM_000143    | 172.9978501 | 5.370327643 | 1.77E-16    | 32.21364907 |
| WDR44        | NM_001184966 | 99.28571429 | 2.415737624 | 1.40E-09    | 41.09954381 |
| AMPD2        | NM_004037    | 48.69011787 | 7.726693155 | 0.003151483 | 6.301546715 |
| SERPINB9     | NM_004155    | 350.6791608 | 10.44649487 | 1.90E-33    | 33.56907413 |
| ATRAID       | NM_016085    | 169.0264215 | 13.44415429 | 1.57E-12    | 12.57248451 |
| TMEM99       | NM_001195386 | 36.93630363 | 1.980124304 | 0.001614489 | 18.65352774 |
| PAPL         | NM_001004318 | 60.60440358 | 7.129759701 | 0.000412402 | 8.500202829 |
| TKT          | NR_047580    | 86.81986799 | 18.81418432 | 0.000336625 | 4.61459644  |
| STARD7-AS1   | NR_046322    | 268.3121358 | 11.77760722 | 1.19E-22    | 22.78154898 |
| RNH1         | NM_203384    | 81.65499293 | 20.07209389 | 0.001029945 | 4.06808544  |
| SAE1         | NR_027280    | 161.0835644 | 10.37211668 | 2.26E-12    | 15.53044276 |
| PFKFB3       | NM_001145443 | 119.3033286 | 14.89910027 | 5.97E-08    | 8.007418329 |
| SEC31A       | NM_001077206 | 222.5604715 | 3.65241081  | 1.52E-21    | 60.93522417 |
| LOC100506368 | NR_038905    | 105.3230929 | 4.146319201 | 2.39E-09    | 25.4015882  |
| AAGAB        | NM_024666    | 128.4396323 | 3.810970054 | 1.07E-11    | 33.70260863 |
| GPI          | NM_001289789 | 96.5077322  | 15.41381916 | 1.50E-05    | 6.261117457 |
| EZH1         | NM_001991    | 164.8945215 | 4.99636851  | 1.31E-15    | 33.00287421 |
| GDI2         | NM_001494    | 96.5077322  | 7.79121176  | 1.99E-07    | 12.38674229 |



|              |              |             |             |             |             |
|--------------|--------------|-------------|-------------|-------------|-------------|
| PMF1-BGLAP   | NM_001199663 | 125.3407072 | 13.28941974 | 1.05E-08    | 9.431616251 |
| ARL15        | NM_019087    | 166.0879679 | 3.176331257 | 1.08E-15    | 52.28924647 |
| DCBLD2       | NM_080927    | 224.6264215 | 9.743379813 | 1.74E-18    | 23.05426103 |
| E2F6         | NM_001278277 | 105.4835644 | 10.29034094 | 1.02E-07    | 10.25073561 |
| ORC1         | NM_004153    | 178.8747572 | 10.92665785 | 8.61E-15    | 16.3704913  |
| GOLGA4       | NM_001172713 | 196.8264215 | 4.760668459 | 5.25E-18    | 41.34428247 |
| SATB2        | NM_001172509 | 53.69452145 | 3.483059974 | 8.31E-05    | 15.41590494 |
| MTMR10       | NM_017762    | 196.66595   | 5.476753262 | 1.15E-18    | 35.90922224 |
| ALDOC        | NM_005165    | 130.3451108 | 25.63631827 | 1.55E-06    | 5.084392753 |
| SH3BGR       | NM_001001713 | 145.1978501 | 3.955605573 | 2.73E-13    | 36.70685749 |
| TSPO         | NR_046308    | 138.1274965 | 14.59973217 | 1.22E-09    | 9.460960984 |
| ABHD15       | NM_198147    | 116.3648751 | 15.8421463  | 1.51E-07    | 7.34527209  |
| TAF15        | NM_139215    | 303.0220179 | 7.157854767 | 3.67E-29    | 42.33419478 |
| STXBP1       | NM_003165    | 202.5428571 | 6.630731423 | 1.27E-17    | 30.5460807  |
| LOC101929295 | NR_110303    | 112.3934465 | 17.02837275 | 1.03E-06    | 6.600363296 |
| MBTD1        | NM_017643    | 65.92975012 | 7.163278539 | 0.000170297 | 9.203851247 |
| PAPD4        | NM_173797    | 95.47475719 | 3.702876548 | 5.95E-09    | 25.78394282 |
| ZNF689       | NR_104166    | 52.82201792 | 4.07465233  | 0.000169554 | 12.96356441 |
| LRP6         | NM_002336    | 89.59785007 | 3.69891555  | 3.34E-08    | 24.22273471 |
| PNP          | NM_000270    | 368.4703536 | 17.31572391 | 1.30E-31    | 21.27952348 |
| MRPL43       | NM_176794    | 203.8967751 | 25.45516345 | 1.08E-12    | 8.010035979 |
| NT5C3B       | NR_033465    | 185.7846393 | 9.902694063 | 3.47E-16    | 18.76101979 |
| B4GALT3      | NM_001199874 | 120.3363036 | 29.57308378 | 4.17E-05    | 4.06911584  |
| AKIP1        | NR_045418    | 167.832975  | 11.099729   | 1.06E-13    | 15.12045699 |
| CFAP97       | NM_020827    | 111.2       | 4.949245574 | 7.35E-10    | 22.46807081 |
| NAA16        | NM_024561    | 160.0505893 | 2.806963659 | 2.48E-16    | 57.01911702 |
| ACP2         | NM_001131064 | 214.7780858 | 23.06525395 | 8.12E-14    | 9.311758989 |
| ARMC5        | NM_001105247 | 139.1604715 | 16.37944151 | 5.87E-09    | 8.496044957 |
| NDUFAF5      | NM_001039375 | 162.9890429 | 4.924756465 | 1.14E-15    | 33.09585846 |
| CCDC50       | NM_178335    | 63.70332862 | 3.203148806 | 9.24E-06    | 19.88772064 |
| DLGAP5       | NM_001146015 | 62.67035361 | 2.799927085 | 6.60E-06    | 22.38285202 |
| TAF1A        | NM_001201536 | 57.66595002 | 2.586647991 | 2.03E-05    | 22.29369834 |
| POLD4        | NM_001256870 | 131.2176143 | 17.85007165 | 7.88E-08    | 7.351097345 |
| PPIE         | NR_036543    | 128.2791608 | 12.35268176 | 2.90E-09    | 10.38472157 |
| METTTL21B    | NM_206914    | 111.3604715 | 5.745931756 | 2.91E-10    | 19.3807508  |
| URGCP        | NM_001290076 | 139.1604715 | 7.333008867 | 1.35E-11    | 18.97726758 |
| CAP1         | NM_001105530 | 137.2549929 | 11.26391347 | 1.56E-10    | 12.18537352 |
| EIF1B-AS1    | NR_033965    | 108.4220179 | 3.668545988 | 3.08E-10    | 29.55449332 |
| MAU2         | NM_015329    | 151.0747572 | 12.9161163  | 5.15E-11    | 11.69660862 |
| KIF9-AS1     | NR_033373    | 107.3890429 | 6.954645658 | 2.02E-08    | 15.44133924 |
| PLCB3        | NM_000932    | 84.43297501 | 18.1587955  | 0.000287622 | 4.649701297 |
| EFHC1        | NM_018100    | 46.9451108  | 3.577430589 | 0.000493002 | 13.12257768 |
| DPH5         | NM_015958    | 118.4308251 | 5.742244059 | 1.73E-10    | 20.62448476 |
| INTS12       | NM_001142471 | 273.1560679 | 4.496218489 | 1.55E-28    | 60.75240083 |
| FKBP5        | NM_001145777 | 114.298925  | 4.581699375 | 7.92E-10    | 24.94684083 |
| AADAT        | NM_001286682 | 77.52309288 | 3.129658109 | 1.39E-07    | 24.77046699 |
| TPRA1        | NM_001136053 | 177.8417822 | 9.129099729 | 2.22E-15    | 19.48075796 |
| LOC100507437 | NR_125384    | 96.5077322  | 20.41074011 | 0.000135772 | 4.728281861 |
| SEC23B       | NM_032985    | 137.0945215 | 7.974312549 | 3.01E-11    | 17.19201757 |
| PDHB         | NR_033384    | 154.8857143 | 9.938069522 | 5.81E-13    | 15.58509064 |
| CCDC167      | NM_138493    | 117.3978501 | 14.49370531 | 1.66E-07    | 8.099919764 |
| MEGF9        | NM_001080497 | 112.232975  | 2.868046792 | 1.14E-10    | 39.13219802 |
| POC1A        | NM_001161581 | 57.8264215  | 9.890792836 | 0.002885141 | 5.846490009 |
| E2F8         | NM_001256372 | 90.47035361 | 10.5849167  | 1.99E-06    | 8.547101143 |
| E2F3         | NM_001949    | 312.1583215 | 12.75798185 | 1.39E-25    | 24.46768818 |
| FAM98C       | NM_174905    | 85.6264215  | 7.427540738 | 8.61E-07    | 11.52823317 |
| GMPR2        | NM_001002002 | 132.2505893 | 19.97849755 | 1.17E-07    | 6.619646397 |
| WDR73        | NM_032856    | 105.3230929 | 19.26532781 | 1.56E-05    | 5.466976421 |
| RAB3GAP1     | NM_012233    | 125.1802357 | 3.962151659 | 5.66E-11    | 31.5940041  |
| STX12        | NM_177424    | 199.7648751 | 6.372651092 | 8.58E-18    | 31.34721675 |
| TTK          | NM_003318    | 73.71213579 | 2.740296169 | 3.27E-07    | 26.89933177 |
| FIZ1         | NM_032836    | 122.2417822 | 9.934721439 | 1.32E-09    | 12.30450023 |

|          |              |             |             |             |             |
|----------|--------------|-------------|-------------|-------------|-------------|
| IDH3G    | NM_004135    | 57.66595002 | 8.817386812 | 0.001527189 | 6.54002725  |
| STAM     | NM_003473    | 174.0308251 | 3.663076133 | 2.48E-16    | 47.50947531 |
| DNAJC10  | NM_001271581 | 218.5890429 | 3.981597818 | 2.68E-21    | 54.89982989 |
| RABGAP1L | NM_014857    | 109.4549929 | 2.859107906 | 4.94E-10    | 38.2829178  |
| GK       | NM_203391    | 37.80880717 | 1.305266678 | 0.002721837 | 28.96634673 |
| BBS4     | NM_001252678 | 111.3604715 | 6.407055282 | 1.14E-09    | 17.38091316 |
| ATG10    | NM_031482    | 267.1186893 | 3.354178174 | 1.04E-25    | 79.63759687 |
| AEBP2    | NM_001114176 | 136.0615464 | 4.314491063 | 3.06E-12    | 31.53594351 |
| PML      | NM_033246    | 72.67916077 | 7.472364552 | 4.78E-05    | 9.72639387  |
| MRPS31P5 | NR_051965    | 193.8879679 | 6.358442512 | 4.09E-18    | 30.49299692 |
| CHCHD10  | NM_001301339 | 228.5978501 | 11.39160984 | 5.49E-19    | 20.06721204 |
| FOXJ2    | NM_018416    | 78.55606789 | 8.161437116 | 1.04E-05    | 9.625273929 |
| MCM8     | NM_001281520 | 183.8791608 | 5.450365659 | 2.32E-17    | 33.73703202 |
| EMC4     | NM_016454    | 127.2461858 | 7.585519769 | 9.73E-11    | 16.77488025 |
| FUS      | NM_001170634 | 408.1846393 | 29.10926213 | 3.35E-30    | 14.02250038 |
| MESP2    | NM_001039958 | 91.50332862 | 16.39165914 | 5.87E-05    | 5.58231036  |
| TNK1     | NM_001251902 | 200.7978501 | 29.67582985 | 3.47E-11    | 6.766376916 |
| CPSF2    | NM_017437    | 174.9033286 | 4.57255419  | 1.01E-16    | 38.25068471 |
| AMOTL2   | NM_001278685 | 132.2505893 | 13.41604738 | 1.90E-09    | 9.857641795 |
| ALDH3B1  | NM_001290059 | 110.4879679 | 11.02730045 | 1.19E-07    | 10.01949375 |
| LYRM4    | NR_104417    | 60.76487506 | 4.604829392 | 0.000134118 | 13.1959015  |
| CHP1     | NM_007236    | 141.2264215 | 6.67844575  | 1.20E-11    | 21.14660009 |
| SSBP2    | NM_001256732 | 67.51428571 | 1.497281202 | 3.20E-06    | 45.09125314 |
| SRP9     | NM_003133    | 138.2879679 | 6.358994315 | 8.34E-13    | 21.74682994 |
| OXNAD1   | NM_138381    | 146.0703536 | 6.641009195 | 2.32E-12    | 21.99520424 |
| TRIM38   | NM_006355    | 59.73190005 | 9.755319986 | 0.001425129 | 6.123007767 |
| TARDBP   | NM_007375    | 229.6308251 | 15.67538957 | 2.33E-17    | 14.64913035 |
| CHD7     | NM_017780    | 41.78023574 | 4.335613884 | 0.004447691 | 9.636521346 |
| KLHL28   | NM_017658    | 219.6220179 | 3.284947696 | 7.54E-23    | 66.85708213 |
| TRIT1    | NM_017646    | 176.9692786 | 5.701270946 | 9.47E-17    | 31.04032072 |
| MCUR1    | NM_001031713 | 225.498925  | 8.17973156  | 4.72E-20    | 27.56801044 |
| SHKBP1   | NM_138392    | 75.61761433 | 10.37412326 | 6.71E-05    | 7.289060715 |
| WDR76    | NM_001167941 | 123.4352287 | 6.104628913 | 5.79E-11    | 20.21993973 |
| C3orf17  | NM_015412    | 151.2352287 | 8.125408067 | 8.96E-13    | 18.61263181 |
| CTU2     | NM_001012759 | 116.3648751 | 23.68860436 | 1.26E-05    | 4.912272302 |
| CDKL5    | NM_003159    | 71.48571429 | 1.578828488 | 1.51E-06    | 45.27769471 |
| CCDC115  | NM_032357    | 134.1560679 | 16.6480377  | 1.48E-08    | 8.058371223 |
| CDK1     | NM_001170406 | 76.65058935 | 8.7419817   | 1.88E-05    | 8.768102242 |
| PEX11A   | NM_003847    | 178.8747572 | 5.609585666 | 2.83E-18    | 31.88733854 |
| VMA21    | NM_001017980 | 97.38023574 | 3.546154473 | 9.74E-10    | 27.46079915 |
| FBXO28   | NM_001136115 | 213.5846393 | 4.644596143 | 6.72E-21    | 45.9856213  |
| MMS19    | NM_022362    | 97.54070721 | 13.21233408 | 4.35E-06    | 7.382549262 |
| PRIM2    | NM_000947    | 105.4835644 | 3.754461429 | 8.42E-10    | 28.09552485 |
| UBR7     | NR_038150    | 180.9407072 | 6.463187431 | 8.12E-17    | 27.99558409 |
| CASR     | NM_000388    | 39.87475719 | 3.194963245 | 0.001786066 | 12.48050576 |
| PRSS23   | NR_120593    | 49.72309288 | 5.417462335 | 0.001411035 | 9.178299691 |
| VPS45    | NM_001279355 | 117.2373786 | 2.988849843 | 1.97E-11    | 39.22491418 |
| XRN1     | NM_001282857 | 96.5077322  | 3.299360989 | 4.24E-09    | 29.25043138 |
| SPOCD1   | NM_001281987 | 128.1186893 | 8.064275977 | 8.34E-11    | 15.88719058 |
| SWAP70   | NM_001297714 | 88.40440358 | 5.070907562 | 2.46E-07    | 17.43364526 |
| SMC3     | NM_005445    | 169.0264215 | 3.994819429 | 1.78E-16    | 42.31140468 |
| PEX2     | NM_001079867 | 97.54070721 | 9.133924985 | 5.55E-07    | 10.6789477  |
| FAM86EP  | NR_024253    | 133.1230929 | 9.183694081 | 4.50E-11    | 14.49559314 |
| KIAA1731 | NM_033395    | 147.1033286 | 7.32952362  | 5.12E-12    | 20.06997129 |
| FBXO18   | NM_001258452 | 220.6549929 | 11.37269954 | 1.71E-17    | 19.402165   |
| STRIP1   | NM_033088    | 135.1890429 | 8.688490309 | 9.92E-11    | 15.55955501 |
| ORMDL3   | NM_139280    | 125.1802357 | 13.26057754 | 1.45E-08    | 9.440028942 |
| DHX29    | NM_019030    | 246.5495144 | 3.63747951  | 7.98E-25    | 67.78031702 |
| ZYG11B   | NM_024646    | 152.1077322 | 4.206847009 | 1.33E-13    | 36.15718182 |
| ZNF57    | NM_173480    | 97.38023574 | 5.343375292 | 4.40E-08    | 18.22447993 |
| EDA      | NM_001005613 | 31.93190005 | 1.294909585 | 0.001842755 | 24.65955958 |
| ACIN1    | NM_001164816 | 110.3274965 | 18.62274799 | 1.84E-06    | 5.924340303 |

|              |              |             |             |             |             |
|--------------|--------------|-------------|-------------|-------------|-------------|
| NUP107       | NM_020401    | 135.1890429 | 3.324418061 | 1.80E-13    | 40.665476   |
| VIPAS39      | NM_022067    | 187.8505893 | 6.979576807 | 4.10E-17    | 26.91432368 |
| PLEKHF2      | NM_024613    | 144.3253465 | 4.590679714 | 2.30E-14    | 31.43877498 |
| ACTN1        | NM_001130004 | 138.1274965 | 10.72521374 | 3.46E-10    | 12.87876398 |
| SLC30A5      | NM_001251969 | 166.0879679 | 11.74049547 | 6.03E-13    | 14.14658933 |
| TRAP1        | NM_016292    | 64.73630363 | 10.184102   | 0.000581591 | 6.356604012 |
| MYLK-AS1     | NR_038266    | 118.4308251 | 5.520116644 | 2.20E-10    | 21.45440626 |
| PIIG         | NM_004792    | 73.55166431 | 3.42874192  | 5.45E-07    | 21.45150205 |
| UBE4B        | NM_001105562 | 150.0417822 | 6.180805666 | 2.68E-13    | 24.27544082 |
| RNF170       | NM_001160224 | 167.832975  | 6.231778385 | 1.18E-14    | 26.93179453 |
| COPG2        | NM_012133    | 110.3274965 | 1.547803915 | 1.12E-10    | 71.28002157 |
| PDSS2        | NM_020381    | 127.4066572 | 3.374543009 | 4.43E-12    | 37.7552329  |
| SCML1        | NM_006746    | 80.46154644 | 3.262917167 | 2.37E-07    | 24.65938984 |
| APBB2        | NM_001166050 | 68.7077322  | 6.193526364 | 2.45E-05    | 11.09347538 |
| SLC25A12     | NM_003705    | 122.2417822 | 5.273014559 | 1.26E-10    | 23.18252317 |
| CMPK1        | NM_001136140 | 126.2132108 | 6.918065335 | 2.87E-10    | 18.24400387 |
| DDX26B       | NM_182540    | 125.1802357 | 3.410451608 | 2.03E-12    | 36.70488549 |
| PIGT         | NR_047691    | 170.0593965 | 9.08370336  | 6.62E-15    | 18.72137275 |
| NXF1         | NM_006362    | 162.2770108 | 22.22330903 | 7.45E-10    | 7.302108369 |
| HSD17B7      | NM_016371    | 128.1186893 | 3.236215085 | 6.85E-13    | 39.58905262 |
| TMED7        | NM_181836    | 100.4791608 | 4.444215671 | 9.88E-10    | 22.60897495 |
| MDM4         | NM_001204172 | 139.320943  | 8.610306052 | 1.30E-11    | 16.18071903 |
| PLRG1        | NM_001201564 | 126.3736822 | 3.360530312 | 4.34E-13    | 37.60527967 |
| NMU          | NM_001292045 | 181.8132108 | 3.312944209 | 2.98E-18    | 54.87964761 |
| SMAGP        | NM_001031628 | 68.54726073 | 6.981808412 | 6.51E-05    | 9.81798077  |
| PPP2R1B      | NM_002716    | 217.5560679 | 5.448713871 | 7.39E-21    | 39.92796705 |
| RAB10        | NM_016131    | 80.46154644 | 6.133731614 | 1.82E-06    | 13.11787856 |
| TMEM116      | NM_138341    | 129.3121358 | 3.873648937 | 1.99E-11    | 33.38251294 |
| ICK          | NM_016513    | 106.3560679 | 5.288483174 | 4.10E-09    | 20.11088329 |
| RBP7         | NM_052960    | 72.67916077 | 7.099234045 | 2.94E-05    | 10.23760596 |
| LINC00535    | NR_033858    | 127.4066572 | 4.04555275  | 4.97E-12    | 31.49301594 |
| PCCA         | NM_001178004 | 98.41321075 | 4.363472635 | 5.32E-08    | 22.55387371 |
| ELMOD2       | NM_153702    | 154.1736822 | 2.453676256 | 3.25E-17    | 62.83375072 |
| WARS         | NM_173701    | 121.5297501 | 7.359633344 | 5.52E-10    | 16.51301695 |
| ZNF277       | NM_021994    | 61.79785007 | 2.143012038 | 1.02E-05    | 28.83691224 |
| GNPNAT1      | NM_198066    | 205.6417822 | 4.06456527  | 8.75E-22    | 50.59379504 |
| GNPDA2       | NM_001270880 | 108.4220179 | 5.95640549  | 5.80E-09    | 18.20259183 |
| CREBZF       | NR_028027    | 250.3604715 | 9.529009693 | 8.59E-24    | 26.27350371 |
| PARK2        | NM_004562    | 85.46595002 | 1.517483493 | 8.29E-08    | 56.3208433  |
| JAK2         | NM_004972    | 143.1319    | 2.445545943 | 6.45E-14    | 58.52758582 |
| NIP7         | NM_016101    | 119.3033286 | 18.31043517 | 9.10E-07    | 6.515592203 |
| TNFAIP8      | NM_001286817 | 148.2967751 | 4.856535617 | 3.80E-13    | 30.53550655 |
| MAT2A        | NM_005911    | 262.5957001 | 46.29217434 | 3.23E-13    | 5.672572177 |
| NCAPH        | NM_001281711 | 181.8132108 | 13.17302037 | 6.20E-14    | 13.80193803 |
| CDKN1C       | NM_001122631 | 140.1934465 | 12.70792006 | 1.48E-09    | 11.03197422 |
| MCM9         | NM_153255    | 100.3186893 | 5.124915146 | 5.37E-09    | 19.5747025  |
| ACAD11       | NM_032169    | 211.6791608 | 3.298796816 | 3.45E-21    | 64.16859619 |
| PIIB         | NM_000942    | 184.7516643 | 20.990317   | 3.81E-12    | 8.801756748 |
| PWWP2A       | NM_001130864 | 234.4747572 | 5.693556197 | 8.87E-23    | 41.18247877 |
| NR1D1        | NM_021724    | 129.4726073 | 27.5800992  | 4.03E-06    | 4.694421378 |
| RPP40        | NM_006638    | 93.56927864 | 7.011352575 | 2.11E-07    | 13.34539629 |
| TPGS1        | NM_033513    | 144.0044036 | 9.335510822 | 2.40E-11    | 15.42544445 |
| PDIA6        | NM_001282707 | 111.3604715 | 4.935563514 | 3.99E-10    | 22.56286869 |
| FLVCR2       | NM_017791    | 54.72749646 | 7.101894975 | 0.001565666 | 7.706041368 |
| SYNRG        | NM_198882    | 197.698925  | 5.44374405  | 4.21E-18    | 36.31671938 |
| RPS14        | NM_005617    | 228.5978501 | 25.47796065 | 6.15E-15    | 8.97237629  |
| RCL1         | NM_005772    | 79.5890429  | 6.1943879   | 1.62E-06    | 12.84857264 |
| LOC400685    | NR_033982    | 25.89452145 | 0.560255904 | 0.002114356 | 46.21909606 |
| CHID1        | NM_001142677 | 104.4505893 | 12.00387548 | 1.83E-07    | 8.701405599 |
| PARS2        | NM_152268    | 157.1121358 | 13.82422456 | 1.30E-11    | 11.36498725 |
| GKAP1        | NM_025211    | 41.78023574 | 1.281089797 | 0.000723158 | 32.6130423  |
| LOC102723809 | NR_110550    | 82.52749646 | 5.169338117 | 4.02E-07    | 15.96480915 |

|              |              |             |             |             |             |
|--------------|--------------|-------------|-------------|-------------|-------------|
| LINC01012    | NR_038293    | 62.83082508 | 5.324705153 | 3.18E-05    | 11.79986934 |
| RCHY1        | NM_015436    | 156.9516643 | 4.324793366 | 4.01E-15    | 36.29113602 |
| MKRN1        | NM_001145125 | 169.0264215 | 6.494746434 | 1.98E-15    | 26.0250994  |
| STMN2        | NM_007029    | 44.87916077 | 2.603151153 | 0.000422842 | 17.24032072 |
| NEMF         | NM_004713    | 136.3824894 | 5.258083676 | 3.12E-12    | 25.93767954 |
| FLNB         | NM_001164319 | 251.3934465 | 7.713048013 | 8.76E-22    | 32.59326871 |
| CRYZL1       | NM_145858    | 104.4505893 | 3.756768673 | 2.53E-09    | 27.80330609 |
| RNF130       | NM_018434    | 131.2176143 | 4.005579927 | 1.53E-11    | 32.75870578 |
| SAMD8        | NM_001174156 | 213.5846393 | 4.345777423 | 2.11E-20    | 49.14762504 |
| WARS2        | NM_201263    | 130.1846393 | 3.060717988 | 9.74E-13    | 42.53401974 |
| PROSC        | NM_007198    | 156.0791608 | 12.87813974 | 2.20E-11    | 12.11969772 |
| SHMT2        | NM_001166358 | 62.67035361 | 7.803297455 | 0.000213207 | 8.031265497 |
| NQO1         | NM_001286137 | 124.3077322 | 18.4951205  | 1.32E-07    | 6.721109613 |
| TMEM50B      | NM_006134    | 199.6044036 | 2.586194023 | 1.32E-21    | 77.18075358 |
| TMEM246      | NM_032342    | 140.1934465 | 10.00715219 | 5.50E-11    | 14.00932491 |
| PIR          | NM_003662    | 59.73190005 | 3.268445572 | 2.08E-05    | 18.27532346 |
| ASL          | NM_001024944 | 264.3407072 | 12.99728546 | 1.34E-22    | 20.33814738 |
| GSTK1        | NM_015917    | 328.0440358 | 16.77439311 | 1.70E-27    | 19.55623871 |
| SRD5A3       | NM_024592    | 164.0220179 | 7.275367081 | 1.77E-14    | 22.54484428 |
| CDK20        | NM_001170640 | 79.5890429  | 8.633305653 | 8.78E-06    | 9.218837616 |
| TPRKB        | NM_016058    | 134.4770108 | 12.32742411 | 5.19E-10    | 10.9087681  |
| BDNF-AS      | NR_033312    | 242.2571429 | 4.999861608 | 3.42E-22    | 48.45276967 |
| NGFR         | NM_002507    | 279.032975  | 13.63135618 | 9.69E-24    | 20.46993501 |
| KIAA1683     | NM_025249    | 62.83082508 | 9.834980992 | 0.000733679 | 6.388504984 |
| TBCEL        | NM_152715    | 75.61761433 | 2.940237524 | 5.65E-07    | 25.71819919 |
| FAM63B       | NM_001040453 | 128.4396323 | 5.079518772 | 2.77E-11    | 25.2857875  |
| ARSG         | NM_014960    | 106.5165394 | 12.88650985 | 1.09E-06    | 8.265739955 |
| CEP63        | NM_001042384 | 98.57368223 | 4.109169488 | 1.68E-08    | 23.98871171 |
| PDRG1        | NM_030815    | 125.5011787 | 16.24573411 | 1.04E-07    | 7.725177442 |
| SP3          | NM_001172712 | 229.4703536 | 6.277433045 | 1.44E-20    | 36.55480703 |
| STEAP1B      | NM_001164460 | 50.75606789 | 4.820631998 | 0.000705788 | 10.52892399 |
| ZNF74        | NM_001256525 | 158.1451108 | 7.228598601 | 7.38E-14    | 21.87769989 |
| PSMA5        | NM_001199772 | 195.7934465 | 8.048376483 | 4.47E-17    | 24.32707353 |
| ASB16-AS1    | NR_049730    | 223.753918  | 14.41417988 | 4.95E-18    | 15.52318063 |
| DPM1         | NM_003859    | 166.0879679 | 8.678847718 | 7.62E-14    | 19.13709899 |
| PTGES3L      | NM_001261430 | 47.97808581 | 7.764445061 | 0.003274615 | 6.179203463 |
| NCOA7        | NM_001122842 | 168.153918  | 3.836152253 | 2.56E-16    | 43.83400524 |
| HADHB        | NM_001281513 | 167.832975  | 4.81099007  | 6.27E-16    | 34.88532975 |
| BDH1         | NM_203314    | 151.0747572 | 10.77248134 | 9.44E-12    | 14.02413728 |
| TTPAL        | NM_001039199 | 242.5780858 | 15.34798484 | 6.30E-19    | 15.80520754 |
| LGR4         | NM_018490    | 64.73630363 | 3.098555651 | 5.49E-06    | 20.89241276 |
| IVNS1ABP     | NM_006469    | 336.698925  | 5.59671403  | 1.29E-35    | 60.16010881 |
| DEF6         | NM_022047    | 79.74951438 | 11.4809616  | 2.87E-05    | 6.946239969 |
| ARMC6        | NM_033415    | 92.53630363 | 8.965503403 | 2.29E-06    | 10.32137287 |
| FKBP1A       | NM_001199786 | 135.1890429 | 14.17805691 | 6.32E-09    | 9.535089591 |
| VWA8-AS1     | NR_039974    | 210.6461858 | 3.912367994 | 5.91E-22    | 53.84109728 |
| ACSS2        | NM_018677    | 141.2264215 | 8.175694868 | 1.55E-11    | 17.27393497 |
| TCEAL4       | NM_024863    | 70.61321075 | 13.88629715 | 0.001306655 | 5.085100079 |
| GTF3C2       | NM_001035521 | 79.74951438 | 11.80865705 | 3.23E-05    | 6.753478745 |
| ZNF28        | NR_036600    | 95.47475719 | 5.833769342 | 2.63E-08    | 16.36587798 |
| FAM120AOS    | NM_198841    | 133.2835644 | 31.550607   | 8.97E-06    | 4.224437404 |
| TMEM164      | NM_032227    | 42.81321075 | 3.128727786 | 0.001004147 | 13.68390403 |
| GSTO2        | NM_001191014 | 181.9736822 | 7.042898651 | 7.73E-17    | 25.83789591 |
| LOC100288152 | NR_125375    | 110.3274965 | 23.7575009  | 3.13E-05    | 4.6439016   |
| KCTD5        | NM_018992    | 66.64178218 | 11.97243188 | 0.000515077 | 5.566269481 |
| PELO         | NM_015946    | 127.2461858 | 15.70928541 | 1.33E-08    | 8.100061998 |
| DHRS4        | NM_021004    | 181.9736822 | 11.35234639 | 4.86E-15    | 16.02960974 |
| SULT1A1      | NM_177536    | 115.3319    | 8.744424598 | 9.21E-09    | 13.18919258 |
| ITGB4        | NM_001005731 | 101.6726073 | 15.29501985 | 4.99E-06    | 6.647432186 |
| PLEKHA8P1    | NR_037144    | 136.2220179 | 5.125980076 | 1.49E-12    | 26.57482392 |
| SNAI1        | NM_005985    | 263.1472607 | 21.9414293  | 9.32E-19    | 11.99316859 |
| ENY2         | NM_001193557 | 272.4440358 | 12.63259586 | 1.29E-23    | 21.56674992 |

|           |              |             |             |             |             |
|-----------|--------------|-------------|-------------|-------------|-------------|
| MSLN      | NM_001177355 | 75.61761433 | 11.34043969 | 0.000148273 | 6.667961422 |
| HEATR6    | NM_022070    | 195.7934465 | 7.740957152 | 1.07E-17    | 25.29318308 |
| G3BP2     | NM_203504    | 130.3451108 | 7.006591328 | 4.55E-11    | 18.60321299 |
| ST20      | NR_037652    | 182.8461858 | 7.689459647 | 9.50E-16    | 23.77880816 |
| EYA3      | NM_001990    | 111.520943  | 5.183991113 | 1.70E-09    | 21.51256445 |
| ZNF37A    | NM_003421    | 74.7451108  | 3.705453648 | 2.50E-06    | 20.17164911 |
| CABIN1    | NM_001199281 | 178.8747572 | 8.072362129 | 5.54E-15    | 22.1589114  |
| ANKRD12   | NM_015208    | 143.1319    | 2.325886295 | 6.38E-14    | 61.53864887 |
| SPCS3     | NM_021928    | 165.9274965 | 2.816623592 | 2.01E-18    | 58.91007125 |
| RNF34     | NM_025126    | 226.6923715 | 8.570461269 | 3.07E-20    | 26.45042833 |
| RBBP6     | NM_018703    | 188.0110608 | 5.160042837 | 1.71E-18    | 36.43594961 |
| MZT1      | NM_001071775 | 100.4791608 | 8.30356054  | 5.03E-08    | 12.100732   |
| OSTC      | NM_021227    | 139.1604715 | 4.175364109 | 2.62E-14    | 33.32894278 |
| ECT2      | NM_001258316 | 108.5824894 | 3.9753057   | 1.89E-09    | 27.31424892 |
| FAHD1     | NM_031208    | 131.3780858 | 3.520268514 | 1.41E-12    | 37.32047294 |
| ZFP1      | NM_153688    | 171.8044036 | 3.801733213 | 9.82E-18    | 45.19107311 |
| 6-Mar     | NM_001270660 | 137.0945215 | 5.679819617 | 4.30E-12    | 24.13712595 |
| BIRC2     | NM_001256166 | 165.0549929 | 4.487349053 | 3.22E-16    | 36.78229418 |
| IQCC      | NM_001160042 | 156.9516643 | 30.48891176 | 2.84E-07    | 5.147827695 |
| NDUFS5    | NM_004552    | 212.7121358 | 8.420149129 | 1.28E-19    | 25.26227654 |
| HEXB      | NM_000521    | 307.86595   | 6.642504115 | 3.53E-30    | 46.34787494 |
| ATP11B    | NM_014616    | 88.56487506 | 2.507794723 | 2.59E-08    | 35.31583916 |
| G3BP1     | NM_005754    | 221.5274965 | 9.258629792 | 2.84E-19    | 23.92659621 |
| CDAN1     | NM_138477    | 140.032975  | 19.24525403 | 1.99E-08    | 7.276234171 |
| ZNF280B   | NM_080764    | 55.76047148 | 10.20520345 | 0.002470535 | 5.463925509 |
| SERINC3   | NM_198941    | 110.3274965 | 9.329473825 | 3.08E-08    | 11.82569334 |
| FAM83B    | NM_001010872 | 135.1890429 | 1.699520182 | 1.46E-13    | 79.54541779 |
| MRPS2     | NM_016034    | 130.1846393 | 25.50593036 | 1.74E-06    | 5.104092949 |
| FN3KRP    | NR_046408    | 135.1890429 | 13.90398201 | 1.96E-09    | 9.723045012 |
| HSD17B4   | NM_000414    | 138.1274965 | 3.208706127 | 1.96E-13    | 43.04772422 |
| TBC1D12   | NM_015188    | 201.6703536 | 3.196124601 | 5.11E-20    | 63.0984016  |
| COL4A3    | NM_000091    | 129.3121358 | 3.785763439 | 3.18E-12    | 34.15747916 |
| CPSF7     | NM_001136040 | 164.1824894 | 11.60940611 | 2.35E-12    | 14.14219537 |
| MAP3K7    | NM_145332    | 105.3230929 | 4.807775777 | 4.44E-09    | 21.90682298 |
| DNAH14    | NM_001145154 | 195.7934465 | 3.184678611 | 8.42E-20    | 61.47981331 |
| RNASEH1   | NM_001286837 | 129.3121358 | 9.772574982 | 1.13E-09    | 13.23214568 |
| ZNF142    | NR_073600    | 79.74951438 | 10.91172906 | 2.67E-05    | 7.30860471  |
| PTGES2    | NM_025072    | 114.298925  | 12.06519135 | 6.80E-08    | 9.473444864 |
| SSR3      | NM_007107    | 193.7274965 | 7.62252632  | 5.69E-18    | 25.41512988 |
| ATP6V1F   | NM_001198909 | 208.5802357 | 24.37003238 | 8.37E-13    | 8.558882175 |
| ZNF431    | NM_133473    | 134.3165394 | 3.356650678 | 1.31E-12    | 40.01504841 |
| EIF2B2    | NM_014239    | 123.2747572 | 22.49611686 | 2.78E-06    | 5.479823826 |
| ALG11     | NR_036571    | 130.1846393 | 4.674072704 | 3.95E-12    | 27.85250628 |
| TCEANC    | NM_001297564 | 73.55166431 | 4.670586806 | 1.09E-06    | 15.74784227 |
| SNHG1     | NR_003098    | 271.4110608 | 52.12696186 | 1.95E-12    | 5.206730857 |
| ANKRD10   | NM_017664    | 173.8703536 | 10.33364492 | 3.77E-14    | 16.8256559  |
| HS2ST1    | NM_001134492 | 179.9077322 | 2.944501486 | 1.74E-17    | 61.09955559 |
| MRPL21    | NM_181514    | 163.1495144 | 10.9724767  | 2.92E-13    | 14.86897798 |
| CR2       | NM_001006658 | 84.59344649 | 5.264513855 | 2.77E-07    | 16.06861504 |
| PTPRK     | NM_002844    | 151.0747572 | 2.101020835 | 2.50E-14    | 71.90540648 |
| MRPL12    | NM_002949    | 148.1363036 | 12.32451676 | 2.49E-11    | 12.01964397 |
| RPL9      | NM_000661    | 183.0066572 | 23.72015784 | 2.99E-11    | 7.71523775  |
| METTTL21A | NM_145280    | 73.71213579 | 5.839497295 | 1.11E-05    | 12.62302765 |
| SLC36A4   | NM_152313    | 202.7033286 | 2.605617902 | 9.66E-22    | 77.79472519 |
| TOP1      | NM_003286    | 144.1648751 | 5.925780505 | 1.32E-12    | 24.32841968 |
| HECTD2    | NM_001284274 | 92.37583215 | 1.519501986 | 7.05E-09    | 60.79349219 |
| ADAM9     | NR_027638    | 115.4923715 | 3.20374652  | 6.13E-11    | 36.04916019 |
| CAMTA2    | NM_015099    | 109.4549929 | 16.57012252 | 1.23E-06    | 6.605563285 |
| FAM200A   | NM_145111    | 102.5451108 | 7.195272907 | 3.53E-08    | 14.25173334 |
| CCDC127   | NM_145265    | 149.1692786 | 9.369908596 | 7.87E-12    | 15.92003562 |
| CBX8      | NM_020649    | 155.2066572 | 34.54982632 | 1.25E-06    | 4.492255787 |
| ZNF837    | NM_138466    | 204.7692786 | 15.39257601 | 1.14E-15    | 13.30311954 |

|               |              |             |             |             |             |
|---------------|--------------|-------------|-------------|-------------|-------------|
| AHI1          | NM_001134831 | 245.3560679 | 3.176826428 | 5.31E-24    | 77.23307314 |
| NSRP1         | NM_032141    | 178.0022537 | 5.517811116 | 2.71E-16    | 32.2595772  |
| ATRN          | NM_139322    | 166.9604715 | 4.512703926 | 8.05E-15    | 36.99787848 |
| AIF1L         | NM_031426    | 55.6        | 10.59019976 | 0.004287039 | 5.250137037 |
| CHRNA7        | NM_001190455 | 216.5230929 | 3.77490626  | 4.28E-20    | 57.35853501 |
| CEP76         | NR_073537    | 160.0505893 | 8.081877278 | 1.10E-13    | 19.80364015 |
| NOL12         | NM_024313    | 175.0638001 | 16.82550802 | 5.70E-12    | 10.40466653 |
| PLEKHM1       | NR_027782    | 358.9429609 | 38.13835864 | 1.03E-22    | 9.411599597 |
| AXL           | NM_001699    | 97.54070721 | 8.286881587 | 1.92E-07    | 11.77049608 |
| CEP57         | NM_014679    | 146.0703536 | 3.646387882 | 7.64E-14    | 40.05891813 |
| DNAJB6        | NM_058246    | 129.1516643 | 10.07605337 | 1.83E-09    | 12.81768363 |
| RBBP5         | NM_001193273 | 188.8835644 | 6.484423426 | 5.19E-17    | 29.12881407 |
| ARHGAP26      | NM_015071    | 48.69011787 | 5.714382069 | 0.00147937  | 8.520626952 |
| SNUPN         | NM_001042588 | 73.55166431 | 11.15848304 | 9.62E-05    | 6.591546902 |
| JHDM1D-AS1    | NR_024451    | 138.1274965 | 16.93088992 | 2.31E-08    | 8.158312833 |
| ATG101        | NM_001098673 | 208.5802357 | 17.0226183  | 1.74E-15    | 12.253123   |
| PARN          | NM_001134477 | 226.5319    | 5.274132221 | 1.77E-20    | 42.95150189 |
| ASNS          | NM_183356    | 165.9274965 | 6.800447369 | 3.01E-15    | 24.39949719 |
| CTPS1         | NR_125440    | 192.6945215 | 11.61307219 | 5.28E-15    | 16.59289792 |
| LOC100131691  | NR_027334    | 207.8682037 | 28.74061122 | 1.66E-12    | 7.2325603   |
| AURKB         | NM_001284526 | 239.4791608 | 22.34608517 | 6.89E-17    | 10.71682843 |
| C2orf76       | NM_001017927 | 118.4308251 | 5.138180273 | 2.99E-10    | 23.04917671 |
| PHF12         | NM_001033561 | 90.47035361 | 11.08933874 | 3.55E-06    | 8.158318156 |
| UTP3          | NM_020368    | 128.2791608 | 13.69772367 | 1.50E-08    | 9.36499844  |
| KIAA0100      | NM_014680    | 79.5890429  | 13.3337556  | 0.000112268 | 5.96898918  |
| CCNB1IP1      | NM_182852    | 106.3560679 | 6.381081229 | 1.06E-08    | 16.66740542 |
| TMEM165       | NR_073070    | 190.9495144 | 7.769514433 | 2.66E-17    | 24.57676294 |
| RPLP1         | NM_001003    | 196.8264215 | 43.15181654 | 3.58E-08    | 4.561254595 |
| RPTOR         | NM_020761    | 117.3978501 | 10.1897149  | 2.77E-08    | 11.52121047 |
| TRMT5         | NM_020810    | 142.098925  | 7.355042643 | 7.51E-13    | 19.31993218 |
| HAPI          | NM_177977    | 276.0945215 | 15.49878454 | 1.01E-22    | 17.81394668 |
| HNRNPAB       | NM_004499    | 216.6835644 | 27.85400491 | 3.05E-13    | 7.77926065  |
| SPATC1L       | NM_001142854 | 36.77583215 | 2.576260916 | 0.002240373 | 14.27488649 |
| SLC22A4       | NM_003059    | 79.74951438 | 7.377582275 | 7.95E-06    | 10.80970858 |
| NDUFS1        | NM_001199982 | 85.46595002 | 4.781477423 | 2.60E-07    | 17.87438117 |
| CD59          | NM_203330    | 228.4373786 | 9.443281617 | 7.72E-20    | 24.19046555 |
| SUMO1         | NM_001005781 | 146.0703536 | 6.368220408 | 1.39E-12    | 22.93738976 |
| STAG2         | NM_001282418 | 48.69011787 | 1.315716255 | 0.000238618 | 37.00654887 |
| BBS7          | NM_176824    | 232.5692786 | 2.507386313 | 1.04E-25    | 92.75366841 |
| SNRNP200      | NM_014014    | 220.4945215 | 12.66045512 | 8.33E-18    | 17.41600278 |
| HR            | NM_018411    | 56.63297501 | 11.78000602 | 0.002314473 | 4.807550601 |
| ERICH1        | NM_207332    | 102.3846393 | 6.351236459 | 9.59E-09    | 16.12042631 |
| NUBP1         | NM_001278506 | 207.7077322 | 10.78844865 | 4.29E-17    | 19.25278962 |
| AKAP3         | NM_001278309 | 47.81761433 | 2.873435387 | 0.000184095 | 16.64127008 |
| LOC643201     | NR_036494    | 91.6638001  | 4.17546741  | 8.79E-08    | 21.95294349 |
| NSMAF         | NM_003580    | 65.60880717 | 4.229346679 | 3.41E-05    | 15.51275224 |
| SUOX          | NM_001032387 | 193.7274965 | 15.20369325 | 1.17E-14    | 12.74213398 |
| SLMO2-ATP5E   | NR_037930    | 152.1077322 | 19.47641292 | 1.98E-09    | 7.809843261 |
| NOTCH2NL      | NM_203458    | 308.0264215 | 11.37705772 | 1.48E-26    | 27.07434815 |
| PRDX1         | NM_181696    | 255.3648751 | 17.27475224 | 1.76E-19    | 14.78254921 |
| DBI           | NM_001178017 | 74.58463932 | 15.8197179  | 0.001027352 | 4.714663041 |
| BMP8A         | NM_181809    | 120.1758322 | 8.877865336 | 1.14E-09    | 13.53656849 |
| UEVLD         | NM_001040697 | 224.46595   | 7.153309278 | 3.65E-20    | 31.37931568 |
| BCL2L2-PABPN1 | NM_001199864 | 119.3033286 | 15.04647282 | 1.08E-07    | 7.928989742 |
| SH2D4A        | NM_001174160 | 85.46595002 | 5.567203806 | 4.69E-07    | 15.35168336 |
| MAP3K8        | NM_005204    | 172.8373786 | 8.224863654 | 2.52E-14    | 21.0140114  |
| ARAP1         | NM_001040118 | 78.55606789 | 9.553854276 | 1.69E-05    | 8.222447781 |
| RNF103        | NM_001198951 | 213.5846393 | 6.404411265 | 6.09E-21    | 33.34961333 |
| OCIAD2        | NM_001286774 | 110.3274965 | 5.86699645  | 2.20E-09    | 18.80476619 |
| MARS2         | NM_138395    | 185.7846393 | 22.68211283 | 1.62E-11    | 8.19079954  |
| ZNF600        | NM_198457    | 136.0615464 | 7.011848541 | 5.38E-12    | 19.40451874 |
| MAP3K14-AS1   | NR_110326    | 211.6791608 | 18.85770895 | 9.70E-15    | 11.22507306 |

|                 |              |             |             |             |             |
|-----------------|--------------|-------------|-------------|-------------|-------------|
| RAD51D          | NR_037711    | 80.62201792 | 7.20444107  | 4.56E-06    | 11.19059996 |
| CKAP5           | NM_001008938 | 161.0835644 | 6.496924454 | 2.99E-14    | 24.79381829 |
| NDUFV3          | NM_001001503 | 159.1780858 | 9.309902118 | 1.33E-13    | 17.09771851 |
| BSDC1           | NM_001300958 | 120.1758322 | 11.43981603 | 6.49E-09    | 10.50504937 |
| ZNF646          | NM_014699    | 177.8417822 | 17.40635999 | 1.84E-12    | 10.21705758 |
| SOD2            | NM_001024465 | 206.6747572 | 10.83830377 | 9.23E-18    | 19.0689209  |
| NUDT12          | NM_001300741 | 174.9033286 | 2.95913018  | 3.94E-19    | 59.10633125 |
| C12orf60        | NM_175874    | 67.67475719 | 4.690387263 | 8.83E-06    | 14.42839437 |
| RPSA            | NM_002295    | 279.1934465 | 28.96850358 | 1.34E-18    | 9.637827709 |
| MTO1            | NM_012123    | 146.0703536 | 6.618676143 | 2.19E-12    | 22.0694215  |
| RDH11           | NM_001252650 | 214.6176143 | 11.90629612 | 5.57E-18    | 18.02555657 |
| RSPO1           | NM_001242910 | 59.57142857 | 4.18088803  | 6.96E-05    | 14.24851088 |
| SYNJ1           | NM_003895    | 176.0967751 | 4.038422228 | 2.93E-16    | 43.6053402  |
| PLIN3           | NM_001164189 | 107.2285714 | 12.79391549 | 3.63E-07    | 8.381216171 |
| AK3             | NM_016282    | 184.7516643 | 6.154292738 | 6.06E-17    | 30.0199669  |
| MINA            | NM_153182    | 186.8176143 | 6.667975092 | 6.93E-17    | 28.0171434  |
| CCDC74A         | NM_138770    | 113.4264215 | 4.605275279 | 4.13E-11    | 24.62967242 |
| CYP4V2          | NM_207352    | 66.80225365 | 9.111059163 | 0.000444939 | 7.331996473 |
| LATS1           | NM_004690    | 214.6176143 | 6.126412304 | 4.02E-19    | 35.03153292 |
| SLC25A44        | NR_104408    | 75.61761433 | 12.79663965 | 0.000278495 | 5.90917744  |
| KIAA1586        | NM_001286276 | 197.698925  | 4.901810348 | 2.69E-21    | 40.33181845 |
| ABCD4           | NM_005050    | 138.2879679 | 13.82001793 | 2.28E-09    | 10.00635228 |
| TEX22           | NM_001195082 | 86.49892504 | 20.92397098 | 0.000700933 | 4.133963152 |
| NEK11           | NM_145910    | 46.78463932 | 2.065029618 | 0.000503746 | 22.65567473 |
| SAFB            | NM_002967    | 128.2791608 | 8.180553268 | 1.80E-10    | 15.68098838 |
| PAN2            | NM_001166279 | 96.5077322  | 12.4143153  | 2.68E-06    | 7.773906967 |
| FAM161A         | NM_032180    | 130.1846393 | 5.985279015 | 3.16E-11    | 21.75080543 |
| UBL7            | NM_201265    | 203.7363036 | 9.260311734 | 1.27E-17    | 22.00102    |
| ADII            | NM_018269    | 180.9407072 | 13.70123577 | 2.31E-13    | 13.20615967 |
| HERC4           | NM_022079    | 121.3692786 | 3.7440057   | 2.35E-11    | 32.41695883 |
| CDC6            | NM_001254    | 206.8352287 | 11.18885244 | 1.44E-17    | 18.48583041 |
| GLCCII          | NM_138426    | 230.5033286 | 2.571868134 | 1.81E-23    | 89.62486279 |
| RPP25L          | NM_148179    | 247.4220179 | 44.67450495 | 4.93E-11    | 5.538327021 |
| SNX1            | NM_003099    | 112.232975  | 8.706156266 | 9.19E-09    | 12.89121991 |
| RAPGEF6         | NM_016340    | 187.8505893 | 3.527591715 | 3.61E-18    | 53.25179457 |
| NUSAP1          | NM_001243144 | 74.58463932 | 9.9824261   | 0.000108257 | 7.471594437 |
| GPD1            | NM_001257199 | 71.64618576 | 11.78792412 | 0.00026258  | 6.077930688 |
| TRMT10A         | NM_152292    | 76.65058935 | 1.140826891 | 4.23E-09    | 67.18862425 |
| PAK4            | NM_005884    | 181.8132108 | 9.44034353  | 8.69E-15    | 19.25917316 |
| ERVMER34-1      | NM_001242690 | 120.3363036 | 8.900224396 | 2.01E-09    | 13.5205921  |
| ZCWPW1          | NM_017984    | 176.0967751 | 6.568558637 | 4.26E-16    | 26.80904363 |
| RPS6KA5         | NM_004755    | 89.59785007 | 3.864312756 | 3.63E-08    | 23.1859727  |
| PSMG4           | NM_001128592 | 134.1560679 | 12.13722397 | 8.64E-10    | 11.05327447 |
| MFGE8           | NM_001114614 | 180.9407072 | 13.45057968 | 8.08E-14    | 13.45226091 |
| ACBD3           | NM_022735    | 97.54070721 | 6.54738191  | 1.63E-07    | 14.89766575 |
| NTHL1           | NM_002528    | 70.77368223 | 14.8718611  | 0.000919093 | 4.758898819 |
| CDCA7L          | NM_001127371 | 210.8066572 | 6.53982338  | 4.15E-19    | 32.23430435 |
| LRRC49          | NM_017691    | 108.2615464 | 2.243715742 | 2.42E-10    | 48.25100809 |
| EP300           | NM_001429    | 83.56047148 | 7.503717666 | 5.19E-06    | 11.13587627 |
| RNF216          | NM_207116    | 89.59785007 | 7.350497856 | 1.77E-06    | 12.18935803 |
| TMEM184A        | NM_001097620 | 69.74070721 | 12.74651589 | 0.00073071  | 5.471354511 |
| TIFA            | NM_052864    | 179.9077322 | 7.26296687  | 2.03E-16    | 24.77055663 |
| PRPSAP1         | NM_002766    | 136.5429609 | 11.30403687 | 2.11E-10    | 12.07913265 |
| TNFSF12-TNFSF13 | NM_172089    | 77.52309288 | 17.77573597 | 0.001122404 | 4.361174862 |
| DNM2            | NM_004945    | 84.59344649 | 10.58477839 | 1.34E-05    | 7.991990323 |
| PPM1B           | NM_002706    | 202.5428571 | 4.300317598 | 2.29E-19    | 47.09951126 |
| RWDD3           | NR_103484    | 151.9472607 | 4.333622791 | 2.94E-15    | 35.06241038 |
| RPAP3           | NM_001146076 | 148.1363036 | 3.488565485 | 3.66E-14    | 42.46338624 |
| FAM219A         | NM_001184943 | 95.47475719 | 9.221868458 | 4.42E-07    | 10.35308166 |
| KDELR1          | NM_006801    | 179.7472607 | 10.60590988 | 4.62E-15    | 16.94783971 |
| OSCP1           | NM_206837    | 51.7890429  | 6.833199044 | 0.002168064 | 7.579033272 |
| ATF7IP2         | NR_045816    | 151.2352287 | 3.160228627 | 6.66E-15    | 47.8557872  |

|              |              |             |             |             |             |
|--------------|--------------|-------------|-------------|-------------|-------------|
| SH3TC2       | NM_024577    | 64.73630363 | 4.248534591 | 3.48E-05    | 15.23732531 |
| HIST1H2BK    | NM_080593    | 118.2703536 | 11.24634957 | 8.53E-09    | 10.51633269 |
| JMJD4        | NM_023007    | 228.5978501 | 30.79259757 | 1.68E-13    | 7.423792344 |
| CCSER1       | NM_001145065 | 201.8308251 | 1.408128487 | 3.30E-19    | 143.3326766 |
| ZWINT        | NM_001005413 | 165.9274965 | 8.416308392 | 1.33E-14    | 19.71499721 |
| NARF         | NM_012336    | 161.4045073 | 12.80278785 | 5.82E-12    | 12.60698132 |
| CDKN2AIPNL   | NM_080656    | 210.6461858 | 16.9869564  | 6.28E-16    | 12.40046662 |
| MSH4         | NM_002440    | 146.0703536 | 5.046372755 | 7.08E-13    | 28.94561315 |
| SH3RF1       | NM_020870    | 126.3736822 | 4.718510406 | 8.06E-11    | 26.78253757 |
| ZNF714       | NR_117086    | 185.9451108 | 4.362068037 | 4.96E-18    | 42.62774198 |
| VAX2         | NM_012476    | 83.56047148 | 7.290841547 | 3.50E-06    | 11.46101872 |
| EIF2B3       | NM_001261418 | 95.47475719 | 6.022893581 | 8.49E-08    | 15.85197479 |
| ADCK1        | NM_020421    | 147.4242716 | 5.043749492 | 4.13E-13    | 29.22910263 |
| DEPDC5       | NM_001242897 | 129.3121358 | 7.605370969 | 3.64E-10    | 17.00273876 |
| PRODH        | NM_001195226 | 77.68356436 | 12.48844489 | 0.00017422  | 6.220435373 |
| TPTE2P5      | NR_038258    | 90.63082508 | 2.738572178 | 1.36E-08    | 33.09418893 |
| DDX31        | NM_022779    | 99.44618576 | 9.975082622 | 6.94E-07    | 9.969459856 |
| LOC730101    | NR_024403    | 143.2923715 | 11.63490655 | 3.75E-11    | 12.31573033 |
| SWI5         | NM_001040011 | 180.9407072 | 19.68965294 | 3.57E-12    | 9.189634157 |
| DUSP22       | NR_104474    | 194.7604715 | 5.781886214 | 3.57E-18    | 33.68459086 |
| LOC102723354 | NR_110546    | 83.56047148 | 15.58377406 | 0.000190897 | 5.362017643 |
| DHCR24       | NM_014762    | 226.5319    | 8.503971477 | 1.60E-19    | 26.63836546 |
| TRIM36       | NM_001300759 | 238.4461858 | 3.832420471 | 4.95E-24    | 62.21816932 |
| IFT74        | NM_001099223 | 172.9978501 | 4.266702093 | 8.05E-16    | 40.54603445 |
| TMCC1-AS1    | NR_037893    | 102.5451108 | 7.79957139  | 8.45E-08    | 13.14753153 |
| MRPL36       | NM_032479    | 88.56487506 | 13.14544843 | 0.000125145 | 6.737303452 |
| LRP11        | NM_032832    | 137.2549929 | 6.638322352 | 2.01E-11    | 20.67615666 |
| PTPN13       | NM_080684    | 219.7824894 | 1.941463209 | 8.42E-22    | 113.2045605 |
| MAD2L2       | NM_006341    | 137.0945215 | 16.36884292 | 6.84E-09    | 8.375333685 |
| TARS         | NR_047678    | 77.84403583 | 4.89575067  | 1.56E-06    | 15.90032685 |
| NSUN2        | NM_001193455 | 107.2285714 | 9.928569094 | 7.80E-08    | 10.80000254 |
| DUSP10       | NR_111940    | 46.78463932 | 5.163473694 | 0.002166619 | 9.060690941 |
| TMEM219      | NM_194280    | 90.47035361 | 7.541390178 | 7.30E-07    | 11.9965088  |
| ZMYM6NB      | NM_001195156 | 96.5077322  | 7.762905828 | 2.20E-07    | 12.43190815 |
| MTMR14       | NM_001077526 | 118.2703536 | 9.908492724 | 1.65E-08    | 11.93626083 |
| F11R         | NM_016946    | 68.86820368 | 11.23064876 | 0.000289865 | 6.132166105 |
| TBC1D31      | NM_145647    | 290.3957001 | 6.888628494 | 1.70E-26    | 42.155808   |
| TOPORS       | NM_001195622 | 191.8220179 | 4.53597595  | 1.39E-20    | 42.28902887 |
| ZWILCH       | NM_001287823 | 92.37583215 | 6.187993912 | 9.88E-08    | 14.92823579 |
| LOC100631378 | NR_040015    | 27.8        | 0.527429223 | 0.001396778 | 52.70849394 |
| PTPLAD1      | NM_016395    | 170.9319    | 7.216726414 | 8.26E-15    | 23.68551754 |
| ZNF567       | NM_001300979 | 149.1692786 | 4.680421136 | 3.85E-14    | 31.87090954 |
| PARK7        | NM_007262    | 178.8747572 | 10.89143459 | 2.90E-14    | 16.423434   |
| TIMM23       | NM_006327    | 136.2220179 | 6.882657061 | 1.17E-11    | 19.79206819 |
| LOC100996437 | NR_110037    | 181.8132108 | 10.61935472 | 3.47E-15    | 17.1209283  |
| MAPK8IP3     | NM_001040439 | 97.38023574 | 10.4957064  | 1.20E-06    | 9.278102118 |
| HSPB8        | NM_014365    | 41.78023574 | 3.325817789 | 0.000518163 | 12.56239469 |
| AKAP9        | NM_147185    | 151.2352287 | 2.462221972 | 1.05E-14    | 61.42225616 |
| PPFIBP1      | NM_177444    | 230.5033286 | 4.709560371 | 3.45E-21    | 48.94370397 |
| LINC00933    | NR_038274    | 79.5890429  | 4.193731375 | 1.12E-07    | 18.97809749 |
| PTP4A1       | NM_003463    | 136.2220179 | 25.24963765 | 4.02E-07    | 5.395008823 |
| ASB3         | NM_016115    | 142.098925  | 5.373458402 | 1.44E-12    | 26.44459386 |
| TM2D2        | NM_001024380 | 207.7077322 | 7.958575383 | 1.04E-19    | 26.09860712 |
| LOC100506127 | NM_001282456 | 166.0879679 | 9.78925352  | 1.35E-13    | 16.96635679 |
| ZNF83        | NM_001277949 | 103.4176143 | 6.483982455 | 1.05E-08    | 15.94970607 |
| RPS20        | NM_001146227 | 271.2505893 | 42.12754983 | 1.40E-14    | 6.438793389 |
| HIFX-AS1     | NR_026991    | 190.7890429 | 10.51978094 | 1.32E-16    | 18.13621824 |
| SPTLC1       | NM_006415    | 130.1846393 | 7.925594327 | 1.51E-10    | 16.42585199 |
| KCNK1        | NM_002245    | 52.66154644 | 4.813011878 | 0.000698055 | 10.94149522 |
| RBMX         | NM_001164803 | 241.3846393 | 12.23559578 | 3.91E-20    | 19.72806585 |
| RUFY1        | NM_025158    | 199.6044036 | 13.60447694 | 2.47E-15    | 14.67196457 |
| APOO         | NR_026545    | 103.2571429 | 2.585522981 | 5.21E-10    | 39.93665638 |



|              |              |             |             |             |             |
|--------------|--------------|-------------|-------------|-------------|-------------|
| DHX35        | NM_001190809 | 104.4505893 | 5.653920119 | 5.10E-09    | 18.47401222 |
| DHFR         | NM_000791    | 227.5648751 | 2.932562851 | 3.97E-25    | 77.59931726 |
| NSUN4        | NR_045790    | 169.898925  | 15.06165137 | 4.54E-12    | 11.28023222 |
| CSPP1        | NM_024790    | 169.0264215 | 6.63612542  | 5.52E-15    | 25.47064903 |
| NME1         | NM_000269    | 278.320943  | 22.95642402 | 9.80E-20    | 12.12388056 |
| FAM198A      | NM_001129908 | 74.7451108  | 4.491887273 | 5.37E-06    | 16.64002372 |
| LEO1         | NM_001286430 | 172.8373786 | 7.829477362 | 4.75E-15    | 22.07521276 |
| RNF8         | NM_183078    | 196.66595   | 6.909617234 | 1.14E-17    | 28.46264031 |
| LOC101928580 | NR_120556    | 42.81321075 | 5.025242224 | 0.002752759 | 8.519631262 |
| EFTUD1       | NM_001040610 | 148.1363036 | 3.305835974 | 2.19E-14    | 44.81054257 |
| EXOC1        | NM_001024924 | 105.4835644 | 3.836622432 | 2.53E-09    | 27.49386113 |
| CCDC43       | NM_144609    | 173.8703536 | 5.628687969 | 9.99E-17    | 30.89003238 |
| AGAP2        | NM_014770    | 87.53190005 | 18.1774908  | 0.000172466 | 4.815400596 |
| C1orf43      | NM_001098616 | 74.58463932 | 12.09021723 | 0.000236683 | 6.169007378 |
| SMARCAD1     | NM_001128429 | 149.0088072 | 2.757150216 | 7.71E-15    | 54.04450084 |
| ANO10        | NM_018075    | 99.28571429 | 3.88013472  | 2.92E-09    | 25.58821316 |
| C11orf65     | NM_152587    | 179.9077322 | 3.296454787 | 4.78E-18    | 54.57612611 |
| TERF1        | NM_017489    | 287.1363036 | 3.651462742 | 1.88E-30    | 78.63596698 |
| TMEM161B     | NM_001289008 | 158.1451108 | 4.268118789 | 2.18E-14    | 37.0526498  |
| ARPC1B       | NM_005720    | 166.9604715 | 25.52932305 | 2.90E-09    | 6.539949029 |
| FAM160A2     | NM_032127    | 130.3451108 | 7.604137877 | 3.20E-11    | 17.14133974 |
| UGGT1        | NM_020120    | 158.3055823 | 5.560485014 | 5.03E-14    | 28.46974353 |
| KLHDC7A      | NM_152375    | 36.93630363 | 1.597861448 | 0.000364803 | 23.11608662 |
| TBCC         | NM_003192    | 165.9274965 | 29.53166117 | 1.27E-07    | 5.618630646 |
| FAM86B1      | NR_003494    | 73.55166431 | 6.859256185 | 9.59E-06    | 10.72297962 |
| XBPI         | NM_005080    | 260.2088072 | 18.03843798 | 2.66E-20    | 14.42524056 |
| IL27RA       | NM_004843    | 132.2505893 | 6.357052528 | 1.77E-11    | 20.80375909 |
| FKBP9        | NM_007270    | 113.586893  | 6.200211977 | 5.40E-10    | 18.31984026 |
| PRPF6        | NM_012469    | 59.89237152 | 10.05593843 | 0.001648201 | 5.955920666 |
| EIF5         | NM_001969    | 221.5274965 | 24.45155176 | 2.30E-14    | 9.059854305 |
| STEAP2-AS1   | NR_110029    | 119.3033286 | 1.931778165 | 2.50E-11    | 61.75829646 |
| FECH         | NM_000140    | 86.49892504 | 5.483973056 | 3.24E-07    | 15.77303976 |
| ZBTB37       | NM_001122770 | 155.0461858 | 8.549694094 | 6.01E-13    | 18.13470565 |
| POLDIP2      | NM_001290145 | 128.2791608 | 21.14789213 | 5.55E-07    | 6.065813083 |
| CCNI         | NM_006835    | 101.5121358 | 7.250762294 | 3.37E-08    | 14.00020186 |
| PPP1R21      | NM_001135629 | 165.9274965 | 5.26461717  | 4.21E-15    | 31.51748572 |
| ORC6         | NR_037620    | 151.0747572 | 6.369131054 | 2.14E-14    | 23.71983806 |
| FAM111B      | NM_001142704 | 47.81761433 | 3.697855034 | 0.000807726 | 12.93117602 |
| ZKSCAN3      | NM_001242895 | 96.5077322  | 10.43646434 | 6.07E-07    | 9.247167341 |
| FASTKD3      | NR_036553    | 131.2176143 | 0.962005545 | 6.55E-18    | 136.4000602 |
| ZNF451       | NM_001257273 | 175.9363036 | 8.477144313 | 2.46E-15    | 20.75419471 |
| LOC643770    | NR_038383    | 72.5186893  | 7.205159187 | 2.92E-05    | 10.06482819 |
| FAM45A       | NM_207009    | 341.7033286 | 12.85847844 | 3.38E-29    | 26.57416508 |
| ZDBF2        | NM_001285549 | 54.72749646 | 2.931496247 | 5.12E-05    | 18.66879295 |
| ATXN7L1      | NM_020725    | 126.2132108 | 6.982307407 | 1.05E-10    | 18.07614638 |
| KIZ          | NM_001163022 | 107.3890429 | 3.11987855  | 2.54E-10    | 34.42090491 |
| RBM23        | NM_018107    | 158.8571429 | 9.832796004 | 2.21E-13    | 16.1558465  |
| KIAA0226     | NM_014687    | 116.3648751 | 6.857922695 | 2.73E-09    | 16.96794791 |
| TTC8         | NM_144596    | 40.03522867 | 4.031808185 | 0.001687218 | 9.929844584 |
| EDRF1        | NR_110859    | 129.3121358 | 10.70895806 | 1.33E-09    | 12.075137   |
| DNA2         | NR_102264    | 97.54070721 | 6.092320329 | 3.15E-08    | 16.01043641 |
| TCTN1        | NM_024549    | 130.1846393 | 8.08222917  | 6.87E-11    | 16.10751645 |
| FASN         | NM_004104    | 73.71213579 | 13.21019289 | 0.000287362 | 5.579943943 |
| GNE          | NM_005476    | 77.68356436 | 7.557431226 | 1.40E-05    | 10.27909643 |
| PRRG1        | NM_000950    | 115.1714286 | 1.705003315 | 2.85E-11    | 67.54909362 |
| ZNF322       | NM_001242798 | 185.0726073 | 4.963771279 | 1.04E-17    | 37.28467668 |
| CEP70        | NM_001288966 | 137.2549929 | 3.774450074 | 2.64E-13    | 36.36423592 |
| ZSCAN20      | NM_145238    | 121.2088072 | 7.56700635  | 5.15E-10    | 16.018066   |
| ARFIP1       | NM_001025593 | 180.9407072 | 4.157459234 | 2.48E-16    | 43.52194382 |
| UGP2         | NM_001001521 | 138.1274965 | 6.988807303 | 2.45E-11    | 19.76410144 |
| TFEB         | NM_007162    | 65.60880717 | 9.439584698 | 0.000164385 | 6.95039128  |
| LOC101929657 | NR_110306    | 76.65058935 | 5.706910488 | 1.52E-06    | 13.4311883  |

|             |              |             |             |             |             |
|-------------|--------------|-------------|-------------|-------------|-------------|
| TSGA10      | NM_025244    | 107.3890429 | 4.694643843 | 3.49E-09    | 22.87480084 |
| FITM2       | NM_001080472 | 140.1934465 | 3.052969095 | 1.80E-15    | 45.92036215 |
| NUDT13      | NM_001283016 | 47.81761433 | 6.278466225 | 0.001048168 | 7.616129899 |
| CEBPA       | NM_004364    | 244.3230929 | 12.6966331  | 1.53E-20    | 19.24314037 |
| KLF5        | NM_001730    | 167.832975  | 8.311051187 | 1.65E-14    | 20.19395276 |
| SMDT1       | NM_033318    | 162.9890429 | 16.44343966 | 5.45E-11    | 9.912101498 |
| RPGR        | NM_000328    | 103.4176143 | 1.840139778 | 2.07E-10    | 56.20095582 |
| ABHD6       | NM_020676    | 118.2703536 | 7.523020878 | 2.64E-09    | 15.72112527 |
| TEX264      | NR_103463    | 118.4308251 | 10.52598027 | 1.22E-08    | 11.25128701 |
| SOX9-AS1    | NR_103737    | 47.81761433 | 8.887828086 | 0.004501829 | 5.380123678 |
| FOXRED2     | NM_001102371 | 179.9077322 | 8.787701371 | 1.41E-15    | 20.4726725  |
| PYGO2       | NM_138300    | 291.1077322 | 26.84093979 | 4.44E-20    | 10.84566094 |
| ZFAND1      | NR_033193    | 227.5648751 | 7.093899616 | 2.03E-21    | 32.07895338 |
| CDNF        | NM_001029954 | 219.4615464 | 6.374065874 | 7.22E-21    | 34.43038569 |
| SPNS1       | NM_001142448 | 114.298925  | 8.362670143 | 2.34E-09    | 13.66775481 |
| C10orf88    | NM_024942    | 126.2132108 | 5.665644276 | 7.13E-11    | 22.27693879 |
| ILVBL       | NM_006844    | 61.79785007 | 11.31470944 | 0.001801768 | 5.46172665  |
| BCAS2       | NM_005872    | 151.2352287 | 7.467886908 | 3.47E-13    | 20.25140853 |
| FAM129B     | NM_001035534 | 54.88796794 | 9.353932946 | 0.001618363 | 5.867902652 |
| UBE2K       | NM_001111112 | 207.7077322 | 7.327551288 | 4.47E-18    | 28.34613147 |
| LUC7L3      | NM_006107    | 299.2110608 | 11.09745178 | 4.76E-26    | 26.96214112 |
| UPK3A       | NM_006953    | 92.53630363 | 9.92490666  | 1.08E-06    | 9.323644726 |
| SMAD5       | NM_005903    | 149.0088072 | 3.13508791  | 2.98E-15    | 47.52938719 |
| RPS13       | NM_001017    | 203.7363036 | 21.65642911 | 2.52E-13    | 9.407659156 |
| PCMTD2      | NM_018257    | 97.38023574 | 6.729424324 | 8.09E-08    | 14.47081222 |
| ZNF14       | NM_021030    | 160.0505893 | 4.025783053 | 2.58E-16    | 39.75638708 |
| MRE11A      | NM_005590    | 112.3934465 | 3.040689633 | 7.98E-11    | 36.96314326 |
| FAM154B     | NM_001008226 | 100.4791608 | 6.504192849 | 4.34E-08    | 15.4483674  |
| RTF1        | NM_015138    | 181.8132108 | 8.140001558 | 1.24E-15    | 22.335771   |
| TOR1AIP2    | NM_022347    | 144.1648751 | 9.918761616 | 1.47E-11    | 14.53456396 |
| PXYLP1      | NM_152282    | 80.46154644 | 7.976993581 | 8.81E-06    | 10.08670066 |
| LNPEP       | NM_005575    | 109.6154644 | 3.47101524  | 2.25E-10    | 31.58023138 |
| ISCA2       | NM_001272007 | 126.2132108 | 23.06055722 | 8.25E-06    | 5.473120599 |
| IP6K1       | NM_153273    | 124.3077322 | 6.169108176 | 4.74E-11    | 20.15003282 |
| FUT11       | NM_173540    | 266.2461858 | 42.92447276 | 1.29E-13    | 6.202666419 |
| ELFN1-AS1   | NR_120510    | 96.34726073 | 7.066944949 | 3.48E-08    | 13.63350945 |
| ACP6        | NM_016361    | 212.5516643 | 8.173881491 | 7.73E-19    | 26.00376144 |
| UHRF1BP1    | NM_017754    | 197.698925  | 6.264030354 | 4.51E-18    | 31.56097813 |
| MSRB3       | NM_198080    | 101.3516643 | 1.91623684  | 1.87E-09    | 52.89099041 |
| FAM134C     | NM_178126    | 196.8264215 | 10.95978832 | 1.01E-15    | 17.95896195 |
| OGFR        | NM_007346    | 112.232975  | 13.39297541 | 2.22E-07    | 8.379988133 |
| NPHP4       | NM_015102    | 137.2549929 | 5.311845026 | 5.58E-12    | 25.83941969 |
| PHACTR2     | NM_001100164 | 75.61761433 | 3.471822235 | 8.80E-07    | 21.78038195 |
| MRPL35      | NM_016622    | 121.3692786 | 9.46550524  | 1.72E-09    | 12.82227156 |
| LEPROTL1    | NM_015344    | 119.3033286 | 6.080586773 | 7.30E-11    | 19.62036446 |
| MTPN        | NM_145808    | 103.4176143 | 3.229097228 | 4.20E-10    | 32.02678861 |
| PITPNM1     | NM_004910    | 81.49452145 | 10.66275956 | 1.04E-05    | 7.64291092  |
| BPNT1       | NM_001286150 | 71.64618576 | 6.107961472 | 7.81E-06    | 11.72996688 |
| PCAT6       | NR_046325    | 193.7274965 | 18.00836216 | 4.08E-10    | 10.75764108 |
| ZNF589      | NM_016089    | 172.9978501 | 7.9461775   | 1.83E-15    | 21.77120384 |
| NAE1        | NM_001286500 | 190.7890429 | 5.481969523 | 5.64E-18    | 34.80301051 |
| PAICS       | NM_001079525 | 101.5121358 | 10.91302622 | 2.29E-07    | 9.301923564 |
| RAB4B-EGLN2 | NR_037791    | 84.59344649 | 13.78456429 | 3.76E-05    | 6.13682411  |
| HEBP1       | NM_015987    | 119.3033286 | 7.487035731 | 5.61E-10    | 15.93465464 |
| HHAT        | NM_018194    | 127.2461858 | 2.843764544 | 4.35E-12    | 44.74568263 |
| UBE2A       | NM_003336    | 107.3890429 | 7.775121892 | 8.82E-09    | 13.81187901 |
| DUSP4       | NM_001394    | 208.5802357 | 14.82932086 | 1.30E-15    | 14.06539367 |
| C12orf49    | NM_024738    | 49.88356436 | 8.00221596  | 0.003994767 | 6.233718836 |
| BTA1F1      | NM_003972    | 107.3890429 | 4.27923069  | 2.74E-09    | 25.09540866 |
| U2AF2       | NM_007279    | 212.7121358 | 19.9432645  | 1.09E-14    | 10.66586345 |
| TSC22D1     | NM_006022    | 166.0879679 | 36.17105004 | 2.59E-07    | 4.591737529 |
| KNOP1       | NM_001012991 | 123.2747572 | 12.21222429 | 5.19E-09    | 10.09437382 |

|                       |              |             |             |             |             |
|-----------------------|--------------|-------------|-------------|-------------|-------------|
| PCYOX1L               | NM_001301054 | 74.58463932 | 14.63290508 | 0.000661116 | 5.097049348 |
| TRAPPC3               | NR_073097    | 157.2726073 | 9.574022788 | 8.78E-13    | 16.42701409 |
| SLC35C2               | NM_001281460 | 162.8285714 | 18.6695262  | 1.80E-10    | 8.721623124 |
| SMIM11                | NM_058182    | 110.4879679 | 7.719718678 | 8.74E-09    | 14.3124345  |
| USP39                 | NM_001256726 | 145.1978501 | 10.33427682 | 2.17E-11    | 14.050122   |
| LINC00910             | NR_027412    | 306.070976  | 14.19932864 | 1.38E-25    | 21.5553132  |
| PXK                   | NM_001289100 | 55.6        | 7.557583545 | 0.001621388 | 7.356848875 |
| ELF2                  | NM_001276458 | 81.49452145 | 9.320517471 | 1.51E-05    | 8.743561901 |
| FNDC3B                | NM_022763    | 205.8022537 | 4.645555428 | 2.27E-18    | 44.30089294 |
| TUBB3                 | NM_006086    | 271.2505893 | 25.4708209  | 1.02E-18    | 10.64946397 |
| NFE2                  | NM_001136023 | 71.64618576 | 14.01153815 | 0.000947544 | 5.113370494 |
| CD83                  | NM_004233    | 117.2373786 | 5.263776397 | 3.33E-10    | 22.27248457 |
| SREK1                 | NM_139168    | 81.49452145 | 2.608524991 | 3.48E-08    | 31.24161039 |
| CADPS2                | NM_017954    | 86.49892504 | 1.895177687 | 7.61E-08    | 45.64159108 |
| RBMS1                 | NM_002897    | 87.53190005 | 3.914723156 | 3.79E-08    | 22.35966544 |
| TBP                   | NM_001172085 | 85.46595002 | 8.458742437 | 1.34E-06    | 10.10386008 |
| TUBGCP2               | NM_001256618 | 58.69892504 | 5.034758723 | 9.01E-05    | 11.65873645 |
| PNPLA4                | NM_004650    | 93.40880717 | 2.031015495 | 5.45E-10    | 45.99118392 |
| IQGAP1                | NM_003870    | 136.0615464 | 6.096209953 | 5.61E-12    | 22.31903879 |
| APBA3                 | NM_004886    | 196.8264215 | 12.37310041 | 2.80E-16    | 15.90760722 |
| ARRDC3                | NM_020801    | 139.320943  | 13.54559175 | 8.44E-10    | 10.28533456 |
| WDR4                  | NR_048535    | 156.0791608 | 10.1329852  | 1.38E-12    | 15.40307794 |
| ZNF107                | NM_001013746 | 136.0615464 | 5.423000684 | 1.81E-12    | 25.08971589 |
| MTRF1L                | NM_001114184 | 156.0791608 | 10.33595734 | 1.94E-12    | 15.10060033 |
| PMS1                  | NR_110332    | 287.1363036 | 4.284375654 | 1.45E-27    | 67.01940419 |
| PRDM11                | NM_001256696 | 151.2352287 | 7.687288776 | 1.68E-12    | 19.67341583 |
| NIT1                  | NM_001185093 | 125.1802357 | 25.09906695 | 7.49E-06    | 4.987445788 |
| ASB8                  | NM_024095    | 101.3516643 | 10.46975137 | 5.78E-07    | 9.680427041 |
| PLEKHJ1               | NM_018049    | 91.50332862 | 19.90605949 | 0.000360145 | 4.596757518 |
| TCTN3                 | NM_001143973 | 76.9715323  | 6.803704018 | 1.12E-05    | 11.3131806  |
| CEP95                 | NM_138363    | 221.6879679 | 15.27303631 | 4.22E-17    | 14.51498991 |
| NBN                   | NM_002485    | 265.3736822 | 3.419531604 | 2.56E-27    | 77.60527258 |
| DST                   | NM_001144769 | 37.96927864 | 3.128923602 | 0.003592852 | 12.13493312 |
| ENTHD2                | NM_144679    | 79.5890429  | 7.85851742  | 1.12E-05    | 10.12774276 |
| BAX                   | NM_001291431 | 123.2747572 | 22.82201138 | 2.98E-06    | 5.401572856 |
| BARD1                 | NR_104212    | 151.0747572 | 3.84131817  | 8.95E-14    | 39.32888412 |
| PKIB                  | NM_181794    | 113.26595   | 2.674623255 | 9.64E-11    | 42.34837554 |
| FAM127B               | NM_001134321 | 147.9758322 | 35.31719341 | 3.35E-05    | 4.189909159 |
| JADE1                 | NM_001287443 | 99.44618576 | 8.417740949 | 1.27E-07    | 11.81388051 |
| PCMT1                 | NM_001252051 | 179.0352287 | 4.964413646 | 8.53E-17    | 36.063721   |
| GALNT11               | NM_022087    | 155.9186893 | 4.70308265  | 3.80E-14    | 33.15244509 |
| UBLCP1                | NM_145049    | 219.6220179 | 6.355181143 | 2.36E-21    | 34.55794776 |
| SP2                   | NM_003110    | 79.74951438 | 15.09192851 | 0.000339595 | 5.284249413 |
| HDHD1                 | NM_001178135 | 44.7186893  | 3.330992944 | 0.000502434 | 13.42503273 |
| PIKFYVE               | NM_001178000 | 142.098925  | 3.138657973 | 8.38E-14    | 45.2737846  |
| MAPKBP1               | NM_001265611 | 89.75832155 | 9.847799746 | 6.41E-06    | 9.114555927 |
| RACGAP1               | NM_001126104 | 129.1516643 | 6.672919741 | 1.07E-10    | 19.35459579 |
| LOC100499484-C9ORF174 | NR_036529    | 215.6505893 | 6.015429327 | 1.76E-19    | 35.84957575 |
| AFAP1                 | NM_001134647 | 119.4638001 | 6.977760202 | 2.35E-09    | 17.12065142 |
| BBS9                  | NM_014451    | 53.69452145 | 1.922112806 | 8.59E-05    | 27.93515619 |
| DYNLL1                | NM_001037495 | 157.9846393 | 35.22245212 | 1.22E-06    | 4.485339033 |
| LOC102288414          | NR_104414    | 208.5802357 | 19.70942001 | 3.63E-14    | 10.58276883 |
| COPB2                 | NR_023350    | 93.56927864 | 5.595920689 | 3.49E-08    | 16.72098013 |
| AMZ2                  | NM_001289056 | 238.6066572 | 25.67168756 | 1.26E-15    | 9.294545076 |
| FKBP3                 | NM_002013    | 191.8220179 | 13.55054217 | 1.17E-14    | 14.15604007 |
| MPP6                  | NM_016447    | 81.49452145 | 2.289156088 | 8.86E-08    | 35.60024669 |
| CRSP8P                | NR_003665    | 68.54726073 | 3.119732615 | 1.25E-05    | 21.9721589  |
| FASTKD2               | NM_001136193 | 62.67035361 | 7.203086246 | 0.000240926 | 8.700486357 |
| CRBN                  | NM_001173482 | 143.1319    | 5.714528433 | 1.84E-12    | 25.04701861 |
| PHLDB1                | NM_001144758 | 140.032975  | 13.88024795 | 7.69E-10    | 10.08865083 |
| VWA5A                 | NM_014622    | 172.8373786 | 3.302586234 | 1.98E-17    | 52.33394872 |
| CLASP1                | NM_001142273 | 137.2549929 | 5.626620024 | 8.48E-12    | 24.3938621  |

|               |              |             |             |             |             |
|---------------|--------------|-------------|-------------|-------------|-------------|
| NDUFS8        | NM_002496    | 127.2461858 | 18.28316717 | 1.62E-07    | 6.959745246 |
| BLCAP         | NM_006698    | 264.1802357 | 10.64371945 | 1.65E-23    | 24.82029303 |
| EIF3J-AS1     | NR_034170    | 181.8132108 | 34.33867806 | 1.25E-08    | 5.294706174 |
| PLCXD2        | NM_153268    | 166.9604715 | 4.385409166 | 9.20E-15    | 38.07181158 |
| TAF6L         | NM_006473    | 129.1516643 | 17.7365247  | 6.57E-08    | 7.281678146 |
| GOT2          | NM_002080    | 180.0682037 | 7.321867855 | 2.67E-16    | 24.59320589 |
| RAB1A         | NM_004161    | 93.40880717 | 7.533379825 | 3.44E-07    | 12.39932266 |
| MRRF          | NM_138777    | 166.9604715 | 6.066802603 | 3.59E-15    | 27.52034019 |
| MKRN2OS       | NM_001195279 | 48.69011787 | 3.384916702 | 0.000203547 | 14.38443606 |
| PPOX          | NM_000309    | 95.47475719 | 22.92223566 | 0.000429631 | 4.165159046 |
| TRPC1         | NM_003304    | 58.69892504 | 2.718463907 | 1.81E-05    | 21.5926814  |
| ATPAF2        | NM_145691    | 104.2901179 | 8.623381935 | 8.14E-08    | 12.0938767  |
| RHOBTB1       | NM_014836    | 44.7186893  | 4.485459929 | 0.002333722 | 9.969699876 |
| MRPS35        | NM_001190864 | 152.1077322 | 3.403482585 | 1.79E-14    | 44.69179095 |
| PMS2L2        | NR_003614    | 227.5648751 | 1.448217592 | 7.71E-31    | 157.1344502 |
| CENPU         | NR_104593    | 100.3186893 | 3.13541362  | 5.78E-10    | 31.99536057 |
| TMEM194A      | NM_015257    | 149.1692786 | 7.001623443 | 3.81E-13    | 21.3049559  |
| CHMP1B        | NM_020412    | 108.5824894 | 9.452726571 | 3.17E-08    | 11.48689625 |
| ANGEL2        | NM_144567    | 108.4220179 | 6.375899028 | 5.98E-09    | 17.00497725 |
| GCFC2         | NM_003203    | 235.6682037 | 4.834653528 | 5.00E-23    | 48.74562413 |
| ZNF438        | NM_001143767 | 82.68796794 | 3.131264137 | 1.27E-07    | 26.40721585 |
| ZNF37BP       | NR_026777    | 113.26595   | 2.28102914  | 6.29E-12    | 49.65563483 |
| ADH5          | NM_000671    | 213.5846393 | 7.910115628 | 8.28E-20    | 27.00145603 |
| UBE2C         | NM_001281742 | 131.3780858 | 22.97177535 | 6.20E-07    | 5.719108943 |
| RAI14         | NM_001145522 | 118.2703536 | 4.383925729 | 5.26E-10    | 26.97818369 |
| PDCD6IP       | NM_001162429 | 262.2747572 | 4.264545661 | 1.22E-25    | 61.50121913 |
| ARFGAP3       | NM_014570    | 99.44618576 | 7.850221918 | 1.21E-07    | 12.6679458  |
| LAMC2         | NM_018891    | 112.3934465 | 6.03878753  | 1.14E-09    | 18.61192266 |
| STAT3         | NM_139276    | 58.69892504 | 5.711718663 | 0.000124673 | 10.27692863 |
| LUC7L2        | NM_001270643 | 93.56927864 | 5.821328762 | 6.21E-08    | 16.0735259  |
| MPZL2         | NM_144765    | 70.77368223 | 13.64880261 | 0.000838253 | 5.185340007 |
| TOM1L1        | NM_005486    | 155.2066572 | 11.89691524 | 7.07E-12    | 13.04595806 |
| PSTK          | NM_153336    | 80.78248939 | 18.07156669 | 0.000625726 | 4.470143113 |
| ZNF385A       | NM_001130968 | 54.72749646 | 11.70323522 | 0.004221071 | 4.676270745 |
| ARMC8         | NM_001267042 | 137.2549929 | 5.620198349 | 5.22E-12    | 24.42173468 |
| GSN           | NM_001127666 | 213.5846393 | 10.48112651 | 1.21E-17    | 20.37802322 |
| ZNF791        | NM_153358    | 118.2703536 | 11.54244935 | 3.58E-08    | 10.24655599 |
| LOC101927021  | NR_110068    | 113.4264215 | 14.93322016 | 1.92E-07    | 7.595576861 |
| BCS1L         | NM_001257342 | 134.1560679 | 33.05555855 | 2.06E-05    | 4.058502526 |
| ERCC1         | NM_001983    | 160.0505893 | 18.97149651 | 4.02E-10    | 8.436371337 |
| ESRP1         | NM_001034915 | 59.89237152 | 7.303553791 | 0.000513358 | 8.200442311 |
| TSC22D4       | NM_030935    | 120.3363036 | 11.80871012 | 1.08E-08    | 10.19046978 |
| LCMT1         | NM_016309    | 155.2066572 | 7.483815003 | 7.32E-13    | 20.73897567 |
| EIF4E2        | NM_004846    | 184.7516643 | 12.33899958 | 5.59E-15    | 14.9729857  |
| C10orf32-ASMT | NR_037644    | 127.4066572 | 8.081363012 | 1.86E-10    | 15.76549117 |
| ARG2          | NM_001172    | 81.8154644  | 9.209227873 | 1.65E-05    | 8.884074272 |
| MCCC1         | NR_120640    | 51.7890429  | 4.424937369 | 0.000732197 | 11.70390417 |
| KRR1          | NM_007043    | 142.419868  | 3.520101321 | 1.89E-15    | 40.45902519 |
| AKR1A1        | NM_006066    | 148.2967751 | 12.43303608 | 3.60E-11    | 11.92763973 |
| DHDDS         | NM_024887    | 136.2220179 | 9.268211179 | 1.57E-10    | 14.69776802 |
| MTF2          | NM_001164393 | 171.9648751 | 3.491068391 | 2.65E-16    | 49.25852369 |
| GDPGP1        | NM_001013657 | 177.8417822 | 7.726898896 | 1.29E-16    | 23.01593234 |
| THYN1         | NM_014174    | 130.3451108 | 20.85603749 | 2.43E-07    | 6.249754338 |
| NDUFAB1       | NM_005003    | 156.0791608 | 13.26956574 | 1.82E-11    | 11.76219055 |
| TBCD          | NM_005993    | 127.4066572 | 10.25581563 | 2.41E-09    | 12.4228693  |
| TMEM169       | NM_001142311 | 77.68356436 | 9.855600276 | 4.46E-05    | 7.882174822 |
| SSR4          | NM_001204527 | 93.40880717 | 21.03887637 | 0.000144633 | 4.439819196 |
| ASCC1         | NM_001198800 | 186.9780858 | 6.667795977 | 1.06E-15    | 28.04196266 |
| BCLAF1        | NM_001301038 | 155.2066572 | 6.273367746 | 1.70E-13    | 24.74056416 |
| ANXA6         | NM_001155    | 100.4791608 | 7.99784007  | 1.18E-07    | 12.56328707 |
| CD58          | NR_026665    | 202.8638001 | 6.758415009 | 6.38E-18    | 30.01647573 |
| ARMCX5        | NM_001168485 | 46.78463932 | 4.927922031 | 0.002335472 | 9.493786433 |

|           |              |             |             |             |             |
|-----------|--------------|-------------|-------------|-------------|-------------|
| TMX1      | NM_030755    | 232.4088072 | 2.180290466 | 1.04E-28    | 106.5953417 |
| RPL28     | NM_001136136 | 323.9121358 | 66.16629497 | 2.63E-11    | 4.895425018 |
| HSCB      | NM_172002    | 170.9319    | 13.57967412 | 7.26E-13    | 12.58733446 |
| NFKBID    | NM_139239    | 217.7165394 | 18.07895826 | 5.33E-16    | 12.04253786 |
| HNRNPU    | NM_004501    | 245.5165394 | 11.25930426 | 2.89E-21    | 21.80565811 |
| ST13      | NM_001278589 | 61.79785007 | 6.66519648  | 0.000238651 | 9.271722185 |
| C1orf174  | NM_207356    | 114.298925  | 7.783643006 | 2.81E-09    | 14.68450248 |
| CCT6P1    | NR_003110    | 167.832975  | 8.291801088 | 3.62E-15    | 20.24083468 |
| FAM217B   | NM_001190827 | 254.3319    | 7.864875166 | 2.10E-25    | 32.33769064 |
| MED4      | NM_001270629 | 105.4835644 | 4.738727413 | 6.97E-10    | 22.25989283 |
| ZNF34     | NM_001286769 | 167.2814144 | 10.2233832  | 1.05E-13    | 16.36262783 |
| DAPK1     | NM_001288730 | 92.69677511 | 4.71487513  | 1.66E-07    | 19.66049419 |
| IFIT5     | NM_012420    | 101.5121358 | 12.02957169 | 6.69E-07    | 8.438549469 |
| HERPUD1   | NM_001010989 | 275.2220179 | 12.29406943 | 5.49E-24    | 22.38656773 |
| HINFP     | NM_198971    | 114.298925  | 10.63270958 | 3.76E-08    | 10.74974579 |
| ODF2      | NM_002540    | 91.50332862 | 11.45953138 | 3.56E-06    | 7.984910168 |
| LOC493754 | NR_111973    | 143.1319    | 11.29995489 | 8.04E-11    | 12.6665904  |
| RNF14     | NM_004290    | 111.3604715 | 10.45879529 | 2.84E-08    | 10.64754289 |
| TFRC      | NM_003234    | 228.5978501 | 10.61399896 | 8.23E-19    | 21.53739142 |
| FBXL2     | NM_012157    | 54.88796794 | 3.827842994 | 7.82E-05    | 14.33913774 |
| CSTB      | NM_000100    | 232.4088072 | 26.37091601 | 2.13E-14    | 8.813072972 |
| INTS8     | NR_073445    | 233.7627251 | 8.291803393 | 7.28E-21    | 28.19202459 |
| TOR3A     | NM_022371    | 154.1736822 | 17.4069593  | 2.23E-10    | 8.857014    |
| CAPN2     | NM_001748    | 47.81761433 | 9.61393125  | 0.004729642 | 4.973783678 |
| C16orf13  | NR_109976    | 103.2571429 | 12.19648341 | 2.55E-06    | 8.46614056  |
| SCAMP3    | NM_052837    | 143.1319    | 21.69181425 | 3.81E-08    | 6.598429176 |
| ATL2      | NR_024191    | 140.032975  | 4.769552646 | 1.77E-12    | 29.35977133 |
| COA1      | NM_018224    | 160.0505893 | 5.761326296 | 2.30E-14    | 27.780164   |
| SRP72     | NM_001267722 | 67.83522867 | 5.729755309 | 1.52E-05    | 11.83911441 |
| COX18     | NM_001297733 | 241.3846393 | 7.046127271 | 1.21E-23    | 34.25777452 |
| FAM13B    | NM_001101801 | 200.6373786 | 6.011693836 | 2.59E-18    | 33.37451708 |
| ANLN      | NM_001284301 | 178.8747572 | 4.124374808 | 5.92E-17    | 43.37015075 |
| DYNLRB1   | NM_001281728 | 224.6264215 | 12.75136793 | 7.55E-18    | 17.61586856 |
| SDF2      | NM_006923    | 159.0176143 | 9.189483532 | 4.62E-13    | 17.30430375 |
| RMDN1     | NM_016033    | 222.5604715 | 10.40363125 | 5.17E-19    | 21.39257593 |
| ETV3      | NM_001145312 | 116.3648751 | 9.798355989 | 3.62E-09    | 11.87595911 |
| SLC25A38  | NM_017875    | 142.2593965 | 17.80460235 | 2.74E-09    | 7.990035031 |
| AHCYL2    | NM_015328    | 101.3516643 | 3.791247671 | 2.72E-09    | 26.73306339 |
| PSME4     | NM_014614    | 69.58023574 | 3.987307339 | 3.07E-06    | 17.45043204 |
| OR51B5    | NM_001005567 | 148.1363036 | 13.37558797 | 2.06E-10    | 11.07512462 |
| TRIM21    | NM_003141    | 108.4220179 | 7.027645652 | 4.96E-09    | 15.42792896 |
| CDK2      | NM_001798    | 182.1341537 | 11.7201926  | 1.17E-14    | 15.54020143 |
| DDX39A    | NR_046366    | 144.1648751 | 22.18514675 | 3.17E-08    | 6.498261052 |
| TBCCD1    | NM_018138    | 256.3978501 | 6.19415744  | 5.50E-25    | 41.39349905 |
| NRDE2     | NM_017970    | 51.62857143 | 5.669440557 | 0.000709045 | 9.106466663 |
| PRPF18    | NM_003675    | 133.2835644 | 4.563808234 | 2.50E-12    | 29.20446204 |
| BLOC1S2   | NM_001282439 | 309.9319    | 11.58863776 | 1.10E-27    | 26.74446354 |
| ZNF823    | NM_001080493 | 141.2264215 | 9.539701018 | 2.37E-11    | 14.80407208 |
| AFMID     | NR_027083    | 198.8923715 | 16.51828392 | 1.02E-14    | 12.04074058 |
| SGMS1     | NM_147156    | 85.78689298 | 3.406657877 | 7.62E-08    | 25.18212749 |
| PPP2R5E   | NM_006246    | 120.3363036 | 4.38069929  | 2.73E-10    | 27.46965625 |
| EPB41     | NM_203343    | 140.1934465 | 4.331756558 | 3.67E-12    | 32.36411018 |
| PSMC2     | NM_001204453 | 131.2176143 | 9.180733583 | 1.16E-10    | 14.29271563 |
| ZNF410    | NM_001242928 | 172.1253465 | 6.417182651 | 5.98E-15    | 26.82257244 |
| PLEKHH1   | NM_020715    | 71.64618576 | 10.67517991 | 0.000196692 | 6.711473377 |
| ATP2B4    | NM_001001396 | 79.5890429  | 6.63948257  | 1.90E-06    | 11.98723576 |
| MINOS1    | NR_033758    | 135.1890429 | 5.741351339 | 2.22E-12    | 23.54655462 |
| CAD       | NM_004341    | 165.0549929 | 11.12779521 | 1.07E-12    | 14.83267707 |
| HIBADH    | NM_152740    | 178.8747572 | 2.538688178 | 8.01E-18    | 70.45952267 |
| IPO8      | NM_006390    | 53.85499293 | 3.085617034 | 6.60E-05    | 17.45355705 |
| NSA2      | NM_001271665 | 131.3780858 | 13.25564745 | 2.61E-09    | 9.911102891 |
| AGPAT2    | NM_006412    | 230.5033286 | 14.04266906 | 2.13E-18    | 16.41449554 |

|              |              |             |             |             |             |
|--------------|--------------|-------------|-------------|-------------|-------------|
| CCP110       | NM_001199022 | 87.53190005 | 4.986441668 | 1.11E-07    | 17.55398055 |
| HEATR3       | NM_182922    | 124.3077322 | 5.798742938 | 2.52E-11    | 21.43701377 |
| RNF216P1     | NR_023385    | 145.1978501 | 7.204507154 | 9.33E-13    | 20.15375195 |
| TPT1-AS1     | NR_024458    | 68.7077322  | 9.795584692 | 0.000327136 | 7.01415325  |
| PDHX         | NM_003477    | 159.0176143 | 3.595462972 | 7.24E-16    | 44.22729856 |
| RNF122       | NM_024787    | 120.3363036 | 9.288878369 | 3.01E-09    | 12.95487989 |
| LRIG2        | NM_014813    | 195.7934465 | 5.142299062 | 8.87E-19    | 38.07507967 |
| ZBTB8OS      | NM_178547    | 80.62201792 | 7.116506801 | 5.95E-06    | 11.32887527 |
| ZDHHC21      | NM_178566    | 47.81761433 | 1.617556216 | 0.000213029 | 29.56163988 |
| LRPPRC       | NM_133259    | 122.5627251 | 5.432054654 | 1.27E-10    | 22.56286671 |
| ZNF254       | NM_001278677 | 102.3846393 | 2.584213615 | 6.97E-10    | 39.61926318 |
| ARPC5        | NM_005717    | 146.0703536 | 9.740462298 | 6.36E-12    | 14.99624444 |
| C12orf65     | NM_001194995 | 120.3363036 | 10.88469197 | 5.06E-09    | 11.05555434 |
| HACL1        | NR_104315    | 47.81761433 | 4.195150112 | 0.001133151 | 11.3983083  |
| EXT2         | NM_207122    | 55.76047148 | 4.953072061 | 0.000245071 | 11.25775494 |
| ASTN2        | NM_198187    | 136.2220179 | 3.726022044 | 6.08E-13    | 36.55963821 |
| BFSP1        | NM_001161705 | 54.88796794 | 7.58552559  | 0.001565465 | 7.235881982 |
| LOC100288181 | NR_038925    | 210.8066572 | 18.41090467 | 2.76E-15    | 11.4500977  |
| WDR55        | NM_017706    | 228.5978501 | 27.41815221 | 5.47E-14    | 8.337463748 |
| POLR3C       | NM_006468    | 153.1407072 | 9.659768814 | 8.33E-13    | 15.85345469 |
| DTNBP1       | NM_001271669 | 122.2417822 | 5.964370609 | 1.52E-10    | 20.49533642 |
| DNTTIP1      | NM_052951    | 194.7604715 | 13.79146885 | 6.93E-15    | 14.12180774 |
| SUMF2        | NM_001042469 | 195.7934465 | 13.36982642 | 1.96E-15    | 14.64442696 |
| ZDHHC7       | NM_001145548 | 78.55606789 | 11.42020604 | 5.96E-05    | 6.878690948 |
| RRM1         | NM_001033    | 49.72309288 | 7.545820904 | 0.004457608 | 6.589487548 |
| KCTD20       | NM_001286580 | 114.298925  | 7.02218318  | 4.15E-09    | 16.27683615 |
| ANAPC13      | NM_015391    | 90.63082508 | 8.490452838 | 5.37E-07    | 10.67443949 |
| SEC23IP      | NR_037771    | 191.8220179 | 11.02417867 | 1.55E-15    | 17.40011874 |
| ZC3H14       | NM_001160103 | 177.8417822 | 5.893211031 | 1.60E-16    | 30.17739925 |
| CCDC82       | NM_024725    | 138.1274965 | 0.988538218 | 1.75E-16    | 139.7290403 |
| FLJ31306     | NR_029435    | 178.0022537 | 8.253479922 | 9.87E-15    | 21.56693363 |
| RCOR3        | NM_001136223 | 81.49452145 | 4.622296876 | 6.84E-07    | 17.63074152 |
| CHCHD7       | NM_024300    | 234.6352287 | 16.47945229 | 5.90E-18    | 14.23804775 |
| PANK1        | NM_148977    | 88.56487506 | 7.117336154 | 1.41E-06    | 12.44354252 |
| LOC100507006 | NR_120420    | 94.76272513 | 4.339101917 | 1.68E-08    | 21.83924852 |
| RGS9BP       | NM_207391    | 132.2505893 | 8.911309836 | 1.01E-10    | 14.84075762 |
| SNHG12       | NR_024127    | 337.8923715 | 71.7603967  | 8.47E-14    | 4.708619058 |
| HMGCR        | NM_001130996 | 115.3319    | 4.953449577 | 1.41E-10    | 23.28314809 |
| KAT5         | NM_182710    | 135.1890429 | 32.4794981  | 9.99E-06    | 4.162288545 |
| VDR          | NM_000376    | 294.0461858 | 10.55403143 | 1.83E-25    | 27.86102995 |
| GOSR1        | NM_004871    | 142.098925  | 5.516055388 | 5.36E-13    | 25.76096777 |
| PTDSS2       | NM_030783    | 91.50332862 | 6.171998334 | 9.33E-08    | 14.82555951 |
| PPP2R4       | NM_001271832 | 169.898925  | 11.99323217 | 1.13E-12    | 14.16623331 |
| CST6         | NM_001323    | 77.52309288 | 15.27501754 | 0.001208098 | 5.075155737 |
| NMNAT3       | NM_178177    | 104.2901179 | 2.416103366 | 3.97E-10    | 43.16459276 |
| ERCC5        | NM_000123    | 56.63297501 | 5.094004143 | 0.000170379 | 11.11757537 |
| SRPX         | NM_001170750 | 81.49452145 | 3.250771427 | 8.19E-08    | 25.06928687 |
| BLOC1S4      | NM_018366    | 160.0505893 | 5.807891633 | 1.00E-13    | 27.55743382 |
| FOLR2        | NM_001113536 | 37.80880717 | 3.759235678 | 0.004456729 | 10.0575783  |
| NOTCH2       | NM_024408    | 315.0967751 | 8.377592332 | 8.96E-28    | 37.61185346 |
| GAMT         | NM_000156    | 132.2505893 | 31.56859072 | 1.93E-05    | 4.189309257 |
| MAX          | NM_001271069 | 50.75606789 | 9.271367675 | 0.002835838 | 5.474496285 |
| ATP5SL       | NM_001167869 | 173.1583215 | 19.64223232 | 1.79E-11    | 8.815613148 |
| RPL31        | NM_000993    | 237.5736822 | 38.70397125 | 2.12E-12    | 6.138224957 |
| ELL2         | NM_012081    | 107.3890429 | 5.66443095  | 2.67E-09    | 18.95848742 |
| SPRYD3       | NM_032840    | 83.4        | 12.64552685 | 4.56E-05    | 6.5952175   |
| MED9         | NM_018019    | 136.2220179 | 9.157906729 | 3.52E-11    | 14.87479857 |
| LOC100996455 | NR_073177    | 47.97808581 | 3.871966145 | 0.000303847 | 12.3911429  |
| ZNF708       | NM_001297561 | 229.4703536 | 3.400047794 | 9.07E-24    | 67.49033176 |
| NEURL2       | NM_001278535 | 90.63082508 | 19.99851846 | 0.000297149 | 4.531876962 |
| FBXW11       | NM_012300    | 59.89237152 | 5.729527758 | 0.000136519 | 10.45328237 |
| ZNF416       | NM_017879    | 42.10117869 | 5.18578565  | 0.001902133 | 8.118572871 |

|            |              |             |             |             |             |
|------------|--------------|-------------|-------------|-------------|-------------|
| SLC25A45   | NM_001300820 | 108.4220179 | 13.45845433 | 2.75E-07    | 8.056052742 |
| PTPN2      | NM_080423    | 212.5516643 | 5.145298272 | 1.50E-19    | 41.30988197 |
| IFT88      | NM_006531    | 108.4220179 | 3.68868685  | 2.92E-10    | 29.39312073 |
| STOM       | NR_073037    | 120.3363036 | 4.388879774 | 4.14E-11    | 27.41845524 |
| SEC24C     | NM_198597    | 152.9802357 | 11.41198636 | 1.60E-11    | 13.4052242  |
| PSMA7      | NM_002792    | 155.9186893 | 20.65672103 | 1.74E-09    | 7.548085152 |
| REL        | NM_002908    | 187.6901179 | 4.696445595 | 4.12E-18    | 39.96429089 |
| NGFRAP1    | NM_206917    | 60.60440358 | 9.364072877 | 0.000992398 | 6.472013234 |
| SVIL       | NM_003174    | 47.81761433 | 6.447508903 | 0.001466892 | 7.416447972 |
| CAMK2G     | NM_172171    | 175.7758322 | 12.30365584 | 3.15E-13    | 14.2864718  |
| NUF2       | NM_145697    | 79.5890429  | 1.553118581 | 2.44E-08    | 51.24466598 |
| PSMD7      | NM_002811    | 166.9604715 | 22.91339186 | 8.03E-10    | 7.286589104 |
| HIBCH      | NM_014362    | 65.76927864 | 4.505010618 | 3.82E-05    | 14.59913954 |
| NHLRC3     | NM_001012754 | 62.83082508 | 6.448015209 | 0.000127551 | 9.744211676 |
| ADAMTS7    | NM_014272    | 70.61321075 | 10.7533112  | 0.000194465 | 6.566648118 |
| ALDH6A1    | NM_001278594 | 134.3165394 | 6.909594247 | 1.75E-11    | 19.43913558 |
| PEX11B     | NR_073493    | 90.47035361 | 4.784401246 | 1.79E-08    | 18.90944111 |
| COPA       | NM_004371    | 176.9692786 | 6.857856982 | 2.59E-15    | 25.80533235 |
| KIF22      | NM_001256269 | 176.9692786 | 18.16891113 | 7.58E-12    | 9.740224792 |
| PPAP2C     | NM_177526    | 123.1142857 | 9.105757352 | 2.05E-09    | 13.5204883  |
| CCDC6      | NM_005436    | 112.3934465 | 4.502661131 | 1.57E-09    | 24.96156011 |
| CASZ1      | NM_017766    | 53.85499293 | 7.00087025  | 0.000451957 | 7.692614061 |
| GIT2       | NM_057170    | 137.0945215 | 8.254706644 | 3.74E-11    | 16.60804283 |
| AP4E1      | NM_007347    | 84.59344649 | 2.493089083 | 4.24E-08    | 33.93117681 |
| LINC00674  | NR_027418    | 54.88796794 | 5.644978867 | 0.000345521 | 9.723325672 |
| COL6A2     | NM_001849    | 122.4022537 | 8.069674827 | 4.88E-10    | 15.1681767  |
| ADAL       | NM_001159280 | 92.69677511 | 4.905838473 | 4.18E-08    | 18.8951951  |
| BAD        | NM_032989    | 121.3692786 | 26.64773528 | 1.22E-05    | 4.554581369 |
| WDR7       | NM_015285    | 121.2088072 | 2.541989578 | 3.03E-11    | 47.68265308 |
| ITCH       | NM_001257137 | 167.9934465 | 4.634262286 | 4.46E-15    | 36.25031043 |
| SRSF4      | NM_005626    | 55.92094295 | 9.763871538 | 0.002613628 | 5.727332927 |
| GPATCH2L   | NM_017926    | 220.4945215 | 9.019563622 | 2.36E-18    | 24.44625158 |
| TCOF1      | NM_001135244 | 86.65939651 | 12.26519218 | 4.03E-05    | 7.065474006 |
| TMEM87A    | NM_001286487 | 130.3451108 | 5.587723374 | 1.15E-11    | 23.32705148 |
| DLG2       | NM_001300983 | 31.77142857 | 0.576026865 | 0.001939324 | 55.15615763 |
| EIF3J      | NM_001284336 | 207.5472607 | 10.61311283 | 4.15E-17    | 19.55573865 |
| WDR60      | NM_018051    | 99.44618576 | 5.255139893 | 1.94E-08    | 18.9236039  |
| LIN54      | NM_001115008 | 88.40440358 | 3.750297637 | 2.59E-08    | 23.57263667 |
| SORD       | NR_034039    | 178.8747572 | 7.356043704 | 1.35E-15    | 24.3167067  |
| POLR2G     | NM_002696    | 150.0417822 | 10.75491598 | 3.62E-12    | 13.95099529 |
| SOCS4      | NM_080867    | 157.9846393 | 3.961798778 | 4.98E-16    | 39.87699734 |
| PPP3R1     | NM_000945    | 144.0044036 | 3.872496287 | 5.78E-13    | 37.18645362 |
| GLUL       | NM_002065    | 128.1186893 | 24.36290561 | 1.79E-06    | 5.258760648 |
| EXTL2      | NM_001261442 | 107.5495144 | 4.871604595 | 4.95E-10    | 22.0768152  |
| DNAJC1     | NM_022365    | 71.64618576 | 2.783314209 | 1.78E-06    | 25.74132145 |
| SMARCB1    | NM_003073    | 194.920943  | 9.566902206 | 5.59E-16    | 20.37450982 |
| LNP1       | NM_001085451 | 139.320943  | 4.436589732 | 8.89E-13    | 31.4027105  |
| LINC01271  | NR_109950    | 99.44618576 | 13.29259625 | 3.32E-06    | 7.481321472 |
| DNAAF1     | NM_178452    | 70.61321075 | 13.08943049 | 0.000561164 | 5.394674032 |
| VPS36      | NM_001282168 | 90.47035361 | 4.675868381 | 6.88E-08    | 19.34835334 |
| LGALS3     | NM_001177388 | 67.67475719 | 14.77958035 | 0.002121069 | 4.578936316 |
| LSM5       | NM_001139499 | 194.7604715 | 13.50395782 | 3.19E-15    | 14.42247332 |
| SAA2       | NM_001127380 | 35.90332862 | 1.070936105 | 0.00055421  | 33.52518273 |
| SPTSSB     | NM_001040100 | 68.7077322  | 1.428965994 | 3.58E-07    | 48.08213247 |
| FAM178B    | NM_016490    | 69.58023574 | 8.108374443 | 6.60E-05    | 8.58128053  |
| THAP3      | NM_138350    | 107.3890429 | 22.26955029 | 2.58E-05    | 4.82223671  |
| SLC25A32   | NR_102338    | 163.1495144 | 7.412603047 | 3.22E-14    | 22.00974656 |
| CASP2      | NM_032982    | 82.52749646 | 7.476062757 | 2.40E-06    | 11.0388983  |
| SMC1A      | NM_006306    | 112.3934465 | 7.476527499 | 8.29E-09    | 15.03284065 |
| C12orf43   | NM_001286196 | 73.87260726 | 7.95046631  | 1.33E-05    | 9.291606855 |
| ERICH6-AS1 | NR_121674    | 88.56487506 | 6.314253554 | 4.13E-07    | 14.02618287 |
| IQCB1      | NM_001023570 | 222.5604715 | 3.944389724 | 1.35E-21    | 56.42456427 |

|           |              |             |             |             |             |
|-----------|--------------|-------------|-------------|-------------|-------------|
| RAB37     | NM_001006638 | 227.7253465 | 15.96421976 | 8.08E-18    | 14.26473389 |
| EPS8L2    | NM_022772    | 73.71213579 | 11.21299125 | 8.67E-05    | 6.573815508 |
| COG4      | NM_001195139 | 189.9165394 | 7.352844056 | 1.20E-16    | 25.82899051 |
| HNRNPH3   | NM_012207    | 277.2879679 | 15.09037992 | 5.29E-23    | 18.37514823 |
| SNX12     | NM_001256188 | 67.51428571 | 5.444783339 | 1.98E-05    | 12.39981125 |
| DGUOK-AS1 | NR_104029    | 115.652843  | 9.428398535 | 1.47E-08    | 12.26643555 |
| PNPO      | NM_018129    | 223.5934465 | 18.5808087  | 4.33E-16    | 12.03356916 |
| POLR1B    | NM_001282776 | 163.1495144 | 8.061578357 | 4.25E-14    | 20.23791213 |
| DCBLD1    | NM_173674    | 47.81761433 | 4.208171071 | 0.001317944 | 11.36303956 |
| CNKSR1    | NM_001297647 | 151.9472607 | 9.3105571   | 2.95E-12    | 16.31988925 |
| ZC3HAV1   | NM_020119    | 208.7407072 | 5.820794068 | 1.58E-19    | 35.86120807 |
| PRDX5     | NM_012094    | 120.3363036 | 28.31176061 | 4.22E-05    | 4.250399871 |
| TRIM9     | NM_052978    | 140.1934465 | 4.644266404 | 2.11E-12    | 30.18634899 |
| CPM       | NM_001005502 | 118.2703536 | 5.307575147 | 3.78E-10    | 22.28331212 |
| SFPQ      | NM_005066    | 243.6110608 | 15.30666501 | 1.26E-19    | 15.91535848 |
| NEK3      | NM_152720    | 44.00665724 | 4.036935002 | 0.00333465  | 10.90100713 |
| ZNF169    | NM_003448    | 50.04403583 | 4.250699826 | 0.000627124 | 11.77312863 |
| LEPREL4   | NM_006455    | 88.56487506 | 14.74024651 | 3.82E-05    | 6.008371367 |
| CGNL1     | NM_032866    | 96.34726073 | 4.836959651 | 4.56E-08    | 19.91897135 |
| UHMK1     | NM_175866    | 207.7077322 | 3.912405468 | 1.75E-21    | 53.08952098 |
| LDHB      | NM_001174097 | 198.7319    | 8.735250901 | 1.47E-17    | 22.75056576 |
| AUH       | NM_001698    | 85.6264215  | 5.235415668 | 5.48E-07    | 16.35522887 |
| PTGR2     | NM_001146154 | 145.1978501 | 8.588141505 | 1.70E-11    | 16.90678361 |
| MMGT1     | NM_173470    | 79.42857143 | 3.963577759 | 1.61E-07    | 20.03961478 |
| ATP10D    | NM_020453    | 135.3495144 | 3.387573096 | 5.44E-13    | 39.95471406 |
| UBA2      | NM_005499    | 185.9451108 | 7.770417581 | 2.48E-16    | 23.92987364 |
| NCAPG2    | NR_104054    | 160.0505893 | 5.394754446 | 1.62E-14    | 29.66781731 |
| E2F7      | NM_203394    | 300.9560679 | 8.961789877 | 7.02E-27    | 33.58213839 |
| GYS1      | NR_027763    | 175.9363036 | 10.51496601 | 9.38E-15    | 16.73198977 |
| RAD51B    | NM_133509    | 59.57142857 | 3.985872877 | 2.60E-05    | 14.94564187 |
| SEL1L     | NM_001244984 | 118.2703536 | 3.840402437 | 8.17E-11    | 30.79634375 |
| SAYS1D    | NM_018322    | 117.2373786 | 4.2085307   | 2.86E-11    | 27.85708053 |
| GOSR2     | NM_001012511 | 278.4814144 | 11.9004596  | 6.44E-24    | 23.40089575 |
| CNN2      | NM_004368    | 96.5077322  | 18.75424349 | 2.99E-05    | 5.14591443  |
| FAM73A    | NM_198549    | 101.5121358 | 4.640313756 | 1.01E-08    | 21.87613621 |
| TPM2      | NM_001301227 | 159.0176143 | 17.29252714 | 4.56E-11    | 9.195741779 |
| MPI       | NM_001289155 | 146.0703536 | 26.39139547 | 1.81E-07    | 5.534771883 |
| B4GALNT1  | NM_001276468 | 74.58463932 | 11.54015809 | 0.000126673 | 6.463051785 |
| APLP2     | NM_001642    | 154.1736822 | 5.521099577 | 6.56E-14    | 27.92445238 |
| STRN3     | NM_014574    | 122.2417822 | 4.116076915 | 1.20E-10    | 29.69861465 |
| SPIN3     | NR_027139    | 167.9934465 | 4.471410334 | 1.78E-16    | 37.57057258 |
| EPG5      | NM_020964    | 136.0615464 | 3.077868816 | 2.75E-13    | 44.20641508 |
| PGS1      | NR_111989    | 183.0066572 | 17.53747579 | 2.59E-12    | 10.43517662 |
| SLC12A9   | NM_001267814 | 84.59344649 | 13.00131945 | 2.31E-05    | 6.506527805 |
| MAST3     | NM_015016    | 142.098925  | 10.01371451 | 6.63E-11    | 14.19043102 |
| CITED2    | NM_001168388 | 80.62201792 | 12.66318004 | 0.000140303 | 6.366648634 |
| BRMS1L    | NM_032352    | 295.0791608 | 4.774449284 | 4.95E-30    | 61.80381091 |
| MRPL10    | NM_145255    | 241.7055823 | 22.01159485 | 4.87E-17    | 10.98083006 |
| UGT8      | NM_001128174 | 70.77368223 | 3.761805843 | 1.40E-06    | 18.813752   |
| GTF2H2C_2 | NM_001042490 | 174.0308251 | 3.341288266 | 1.07E-17    | 52.08494784 |
| TUFT1     | NM_001301317 | 264.3407072 | 6.577366732 | 5.79E-25    | 40.18944328 |
| ZNF780A   | NM_001142577 | 109.2945215 | 6.071572425 | 3.37E-09    | 18.00102409 |
| AGFG2     | NM_006076    | 127.2461858 | 9.356815465 | 7.61E-10    | 13.59930483 |
| LINC00920 | NR_046242    | 64.57583215 | 12.18729532 | 0.001644387 | 5.298618804 |
| CPSF3     | NM_016207    | 86.49892504 | 7.258929455 | 2.33E-06    | 11.91620962 |
| SLC46A3   | NM_181785    | 122.2417822 | 5.020628126 | 6.53E-11    | 24.3479061  |
| GCC2      | NR_028063    | 171.8044036 | 4.269516241 | 4.59E-16    | 40.23978219 |
| HNRNPC    | NM_001077442 | 224.6264215 | 16.16978786 | 7.51E-17    | 13.89173584 |
| ZNF566    | NM_001145343 | 95.47475719 | 2.526068436 | 2.13E-09    | 37.79579201 |
| CNKSR3    | NM_173515    | 185.9451108 | 5.297848407 | 6.72E-17    | 35.09823168 |
| EIF3CL    | NM_001099661 | 319.2286752 | 39.25242923 | 2.84E-19    | 8.13271131  |
| EFCAB2    | NM_001290327 | 138.1274965 | 5.236727482 | 5.16E-12    | 26.37668218 |



|              |              |             |             |             |             |
|--------------|--------------|-------------|-------------|-------------|-------------|
| SEMA3B       | NR_110697    | 48.85058935 | 3.513853998 | 0.000542444 | 13.90228205 |
| REPS1        | NM_001286612 | 159.0176143 | 2.300352679 | 2.82E-16    | 69.12749327 |
| PABPC4       | NM_001135654 | 237.4132108 | 18.25494588 | 1.36E-17    | 13.00541849 |
| FXR1         | NM_001013438 | 91.50332862 | 6.058008964 | 1.27E-07    | 15.10452183 |
| INVS         | NM_183245    | 169.0264215 | 4.324926187 | 5.50E-15    | 39.08192052 |
| NPNT         | NM_001033047 | 83.56047148 | 2.463841651 | 6.95E-08    | 33.91470853 |
| GNL2         | NM_013285    | 130.3451108 | 8.217558538 | 5.40E-11    | 15.86178062 |
| CLSPN        | NM_001190481 | 163.1495144 | 10.65346297 | 5.68E-13    | 15.31422363 |
| LAMTOR5-AS1  | NR_102697    | 130.3451108 | 15.59878617 | 1.05E-08    | 8.356106003 |
| CPTP         | NM_001029885 | 174.0308251 | 23.53774629 | 3.70E-10    | 7.393691093 |
| PRKAB2       | NM_005399    | 80.62201792 | 8.582524481 | 4.70E-06    | 9.393741678 |
| PARP16       | NM_017851    | 124.3077322 | 13.76053393 | 1.02E-08    | 9.033641633 |
| LBR          | NM_194442    | 91.50332862 | 11.35966778 | 2.85E-06    | 8.055106047 |
| SLU7         | NM_006425    | 82.52749646 | 4.251876704 | 1.78E-07    | 19.40966359 |
| RBMX2        | NM_016024    | 119.1428571 | 3.791573758 | 9.49E-12    | 31.42306197 |
| GLS          | NM_014905    | 285.0703536 | 5.130841865 | 1.99E-27    | 55.56015195 |
| DFFB         | NR_104222    | 44.87916077 | 6.482397451 | 0.002101709 | 6.923234978 |
| CYB5D2       | NM_144611    | 108.4220179 | 22.57132287 | 3.26E-05    | 4.803529617 |
| C11orf45     | NM_001256088 | 65.60880717 | 8.891812586 | 0.000183397 | 7.378563879 |
| SWT1         | NM_001105518 | 64.57583215 | 2.676746201 | 5.64E-06    | 24.12474972 |
| PDHA1        | NM_001173455 | 82.52749646 | 6.694529902 | 1.95E-06    | 12.32760144 |
| ENTPD6       | NM_001114089 | 133.2835644 | 8.675459633 | 2.07E-10    | 15.36328563 |
| BCAS4        | NM_198799    | 60.60440358 | 8.024524484 | 0.000534047 | 7.552398114 |
| SLC35F5      | NM_025181    | 191.8220179 | 4.714335233 | 1.67E-18    | 40.68909155 |
| NFX1         | NM_002504    | 133.2835644 | 7.515633107 | 7.60E-11    | 17.73417654 |
| ULBP3        | NM_024518    | 139.1604715 | 18.89159539 | 1.95E-08    | 7.366263601 |
| SMTN         | NM_006932    | 217.7165394 | 24.06648672 | 2.60E-14    | 9.046461244 |
| ZNF816       | NM_001202456 | 66.64178218 | 2.968423385 | 5.91E-06    | 22.45022813 |
| GNPDA1       | NM_005471    | 142.098925  | 14.06742466 | 3.42E-10    | 10.101275   |
| ARHGEF12     | NM_015313    | 40.9077322  | 4.177277729 | 0.001886046 | 9.792916548 |
| RAB4B        | NM_016154    | 84.59344649 | 10.61299211 | 7.21E-06    | 7.970744315 |
| TUBGCP5      | NM_052903    | 157.1121358 | 7.8387919   | 2.02E-13    | 20.04290174 |
| PAXBP1       | NM_013329    | 193.7274965 | 5.191924911 | 3.09E-18    | 37.31323156 |
| TFAM         | NR_073073    | 125.3407072 | 7.736130631 | 2.79E-10    | 16.2019895  |
| EIF3H        | NM_003756    | 150.2022537 | 6.042139599 | 2.14E-13    | 24.85911674 |
| LOC101928069 | NR_120586    | 215.6505893 | 30.80618852 | 2.89E-12    | 7.000235983 |
| BZW2         | NM_014038    | 246.3890429 | 3.305072119 | 1.17E-24    | 74.54876445 |
| RRP9         | NM_004704    | 145.1978501 | 7.663698178 | 1.48E-12    | 18.94618586 |
| DDX49        | NM_019070    | 108.4220179 | 12.48604736 | 3.60E-07    | 8.683454003 |
| ATXN10       | NM_001167621 | 159.8901179 | 5.725493403 | 4.08E-14    | 27.92599809 |
| KHDC1        | NM_001251874 | 295.9516643 | 7.928948513 | 4.43E-27    | 37.32546173 |
| RHBDF2       | NM_024599    | 226.6923715 | 14.95654871 | 2.10E-17    | 15.15673006 |
| TMEM56       | NM_152487    | 88.72534654 | 2.716455109 | 1.96E-08    | 32.66218029 |
| MYH10        | NM_005964    | 116.2044036 | 5.827159915 | 5.62E-10    | 19.94185937 |
| MLEC         | NM_014730    | 162.9890429 | 9.050853421 | 4.03E-14    | 18.00814081 |
| AASDH        | NM_001286671 | 188.0110608 | 4.381194157 | 3.89E-18    | 42.91319994 |
| LCLAT1       | NM_001002257 | 85.6264215  | 3.083139656 | 6.64E-08    | 27.7724758  |
| POLR3K       | NM_016310    | 104.2901179 | 1.335423248 | 6.21E-14    | 78.09517919 |
| WASF2        | NM_001201404 | 167.9934465 | 6.840001932 | 3.45E-14    | 24.56043846 |
| HBP1         | NM_001244262 | 51.7890429  | 4.962451455 | 0.000610355 | 10.43618127 |
| RB1          | NM_000321    | 164.0220179 | 2.247210908 | 6.53E-16    | 72.98915174 |
| CES2         | NM_198061    | 109.4549929 | 13.12684661 | 5.15E-07    | 8.338254891 |
| STK40        | NM_032017    | 77.52309288 | 13.75202677 | 0.000212406 | 5.637212186 |
| FOXO4        | NM_001170931 | 49.72309288 | 4.92157978  | 0.000455429 | 10.10307566 |
| MGAT1        | NM_002406    | 90.47035361 | 13.6205948  | 2.38E-05    | 6.642173486 |
| BLZF1        | NM_003666    | 55.76047148 | 3.63655871  | 0.000139177 | 15.3333071  |
| VPS33A       | NM_022916    | 109.4549929 | 5.289254787 | 1.16E-09    | 20.69384012 |
| LYPLA1       | NM_001279356 | 65.60880717 | 5.25653534  | 3.31E-05    | 12.4813785  |
| RAB9A        | NM_001195328 | 108.4220179 | 4.66614907  | 3.63E-10    | 23.23586673 |
| SLC25A19     | NM_021734    | 322.8791608 | 21.53561097 | 2.56E-24    | 14.99280244 |
| LOC439933    | NR_122079    | 46.78463932 | 2.680494849 | 0.000331108 | 17.45373222 |
| DNAJC7       | NM_003315    | 117.3978501 | 9.361708311 | 1.35E-08    | 12.54021661 |

|              |              |             |             |             |             |
|--------------|--------------|-------------|-------------|-------------|-------------|
| ACTR2        | NM_001005386 | 125.3407072 | 4.685471629 | 2.12E-11    | 26.75092651 |
| ZNF250       | NM_021061    | 170.0593965 | 11.75733005 | 2.77E-13    | 14.46411693 |
| GLT8D1       | NM_001278281 | 149.0088072 | 17.22960909 | 5.36E-10    | 8.648414852 |
| MTFR1L       | NM_001099625 | 232.4088072 | 18.11247424 | 2.29E-17    | 12.83142237 |
| DTX2         | NM_001102594 | 200.7978501 | 11.78268009 | 1.34E-15    | 17.0417807  |
| DHRS1        | NM_138452    | 85.46595002 | 5.836651395 | 2.51E-07    | 14.64297664 |
| UBE2W        | NR_073121    | 218.5890429 | 7.005700973 | 3.66E-19    | 31.20159478 |
| PHF6         | NM_032335    | 147.9758322 | 2.237073034 | 5.24E-16    | 66.14707248 |
| ATP1B3       | NM_001679    | 234.4747572 | 4.89442483  | 6.11E-23    | 47.90649879 |
| ULK4P3       | NR_026859    | 56.63297501 | 7.619102498 | 0.000761404 | 7.433024431 |
| LMBR1L       | NM_001300750 | 109.6154644 | 13.81927383 | 7.63E-07    | 7.932071233 |
| MYO6         | NM_001300899 | 242.4176143 | 3.134208609 | 5.91E-24    | 77.34571772 |
| ZNF24        | NM_006965    | 160.0505893 | 10.00884996 | 4.13E-13    | 15.99090705 |
| L3HYPDH      | NM_144581    | 196.8264215 | 9.053025361 | 1.29E-17    | 21.7415078  |
| LRCH3        | NM_032773    | 227.5648751 | 5.092377686 | 1.54E-21    | 44.68735217 |
| TPCN1        | NM_017901    | 140.1934465 | 10.73362339 | 1.64E-10    | 13.06114826 |
| NUP54        | NR_103781    | 219.6220179 | 5.679390976 | 1.01E-20    | 38.66999452 |
| LACTB        | NM_032857    | 55.76047148 | 7.620786542 | 0.000680874 | 7.316891921 |
| MRPS23       | NM_016070    | 155.2066572 | 10.867866   | 1.66E-12    | 14.28124503 |
| TOP3B        | NM_001282112 | 245.3560679 | 21.3174542  | 6.17E-17    | 11.5096327  |
| BAK1         | NM_001188    | 174.9033286 | 14.82190317 | 1.13E-12    | 11.80032865 |
| SLC30A7      | NM_133496    | 139.1604715 | 3.053671174 | 8.27E-14    | 45.57153129 |
| POLG         | NM_002693    | 255.3648751 | 18.75869253 | 5.08E-19    | 13.61314892 |
| TRIM5        | NM_033093    | 52.82201792 | 2.648418197 | 6.34E-05    | 19.94474211 |
| DBNL         | NM_001014436 | 162.1165394 | 9.13933035  | 6.90E-14    | 17.73833893 |
| HIF1A        | NM_181054    | 134.1560679 | 5.100733535 | 4.12E-12    | 26.30132842 |
| ATG3         | NM_001278712 | 140.1934465 | 3.440401967 | 9.48E-14    | 40.74914729 |
| TMEM69       | NM_016486    | 149.1692786 | 14.77116826 | 2.74E-10    | 10.09867845 |
| NCKIPSD      | NM_016453    | 211.6791608 | 9.925556487 | 3.98E-18    | 21.32667937 |
| MAPK1        | NM_138957    | 138.2879679 | 6.335222707 | 5.22E-12    | 21.8284304  |
| SLC25A15     | NM_014252    | 61.6373786  | 10.88149336 | 0.000836967 | 5.664422755 |
| UBE4A        | NM_004788    | 157.9846393 | 5.267570922 | 9.28E-15    | 29.99193398 |
| LOC100505915 | NR_125434    | 136.2220179 | 7.327940623 | 1.53E-11    | 18.5893998  |
| TRIM32       | NM_001099679 | 90.47035361 | 5.984451972 | 1.50E-07    | 15.11756699 |
| PLEKHG3      | NM_015549    | 57.8264215  | 8.227949735 | 0.000843215 | 7.028047492 |
| C11orf24     | NM_022338    | 196.8264215 | 15.92650955 | 2.06E-14    | 12.35841544 |
| TBRG1        | NM_032811    | 198.8923715 | 9.981549141 | 1.85E-17    | 19.92600234 |
| C18orf54     | NM_001288980 | 154.0132108 | 2.227972466 | 9.80E-17    | 69.12707096 |
| SLC31A1      | NM_001859    | 183.8791608 | 4.526923945 | 1.16E-17    | 40.61900819 |
| ARHGFEF39    | NM_032818    | 160.0505893 | 24.93187983 | 1.10E-08    | 6.419515513 |
| TFCP2L1      | NM_014553    | 193.7274965 | 9.177068934 | 9.34E-16    | 21.10995328 |
| DYRK2        | NM_003583    | 166.9604715 | 5.103972502 | 1.59E-16    | 32.71186736 |
| RTKN         | NM_033046    | 98.57368223 | 15.72537076 | 5.40E-06    | 6.26844885  |
| SF3B1        | NM_001005526 | 106.5165394 | 7.574564698 | 8.54E-09    | 14.06239746 |
| FOXO1        | NM_002015    | 99.44618576 | 4.078888308 | 1.90E-08    | 24.38070823 |
| FRAS1        | NM_025074    | 90.47035361 | 3.543500167 | 2.24E-08    | 25.531353   |
| LOC101593348 | NR_103497    | 131.2176143 | 12.24769701 | 2.33E-09    | 10.71365614 |
| BTG3         | NM_006806    | 206.6747572 | 4.61597464  | 6.51E-21    | 44.7738069  |
| UBE2G2       | NM_003343    | 90.47035361 | 5.547196843 | 7.11E-08    | 16.30920196 |
| BBS1         | NM_024649    | 192.8549929 | 13.12715321 | 1.78E-14    | 14.69130358 |
| TMEM72-AS1   | NR_033842    | 205.6417822 | 5.500978288 | 1.19E-18    | 37.38276565 |
| UTP14A       | NM_001166221 | 48.69011787 | 7.306536481 | 0.003968179 | 6.663912238 |
| ALPK1        | NM_025144    | 41.78023574 | 3.513403133 | 0.000998433 | 11.89167145 |
| TAF6         | NM_005641    | 211.8396323 | 12.34297914 | 1.31E-17    | 17.16276353 |
| KIF26B       | NM_018012    | 51.7890429  | 3.244668573 | 0.000166973 | 15.96127362 |
| EIF4EBP1     | NM_004095    | 176.8088072 | 8.728542915 | 9.05E-15    | 20.25639432 |
| MRPL22       | NM_001014990 | 147.1033286 | 3.407328268 | 1.74E-14    | 43.17263177 |
| APBB3        | NM_006051    | 194.0484394 | 26.46650023 | 9.61E-12    | 7.331851123 |
| GSDMD        | NM_001166237 | 124.1472607 | 26.70846298 | 1.36E-05    | 4.648236808 |
| WDR1         | NM_017491    | 68.54726073 | 13.92153116 | 0.000993354 | 4.92383057  |
| OSER1-AS1    | NR_038337    | 200.7978501 | 10.45071833 | 4.16E-17    | 19.21378453 |
| C19orf12     | NM_001256047 | 165.9274965 | 11.95185867 | 4.57E-13    | 13.88298682 |

|              |              |             |             |             |             |
|--------------|--------------|-------------|-------------|-------------|-------------|
| JKAMP        | NM_001284203 | 113.4264215 | 3.023080908 | 2.43E-11    | 37.52014086 |
| SLC35E4      | NM_001001479 | 118.2703536 | 5.827216268 | 1.22E-10    | 20.29620116 |
| ZMYM1        | NM_001289089 | 144.3253465 | 7.536131069 | 2.36E-12    | 19.15111948 |
| ACBD6        | NM_032360    | 181.9736822 | 3.116133237 | 1.18E-17    | 58.39727265 |
| RBPJ         | NM_005349    | 66.64178218 | 5.111455488 | 3.91E-05    | 13.0377311  |
| RFT1         | NM_052859    | 131.2176143 | 9.384765226 | 6.05E-10    | 13.98198156 |
| KIF3A        | NM_001300792 | 195.7934465 | 2.534692123 | 1.55E-21    | 77.24545507 |
| LOC101928053 | NR_120540    | 175.7758322 | 7.086022432 | 2.47E-16    | 24.80599431 |
| IL4R         | NM_001257997 | 67.67475719 | 7.954846325 | 8.86E-05    | 8.507361981 |
| CENPC        | NM_001812    | 210.6461858 | 3.828613243 | 3.19E-20    | 55.01892524 |
| SIKE1        | NR_049741    | 172.9978501 | 4.136923589 | 8.76E-19    | 41.81799503 |
| GFPT2        | NM_005110    | 103.4176143 | 9.0465632   | 6.50E-08    | 11.43170197 |
| AIMP2        | NM_006303    | 169.0264215 | 19.39145685 | 5.44E-11    | 8.716540628 |
| ZNF557       | NM_001044387 | 225.498925  | 19.85240852 | 3.62E-16    | 11.35876913 |
| MRPL50       | NM_019051    | 150.9142857 | 2.582050069 | 1.27E-17    | 58.44746681 |
| FUNDC1       | NM_173794    | 57.66595002 | 3.601932278 | 0.000104268 | 16.00972633 |
| CYB5R2       | NM_016229    | 90.47035361 | 10.01204107 | 3.07E-06    | 9.036154863 |
| PHKA1        | NM_002637    | 52.66154644 | 1.362411229 | 0.000123058 | 38.65319466 |
| NUP43        | NR_104456    | 140.1934465 | 7.930189512 | 3.91E-12    | 17.67844845 |
| CCDC112      | NM_001040440 | 113.26595   | 2.571099942 | 3.89E-12    | 44.05349951 |
| PRC1         | NM_001267580 | 48.85058935 | 8.916159984 | 0.00428639  | 5.478882101 |
| ARL8B        | NM_018184    | 128.2791608 | 6.350615527 | 2.38E-11    | 20.19948464 |
| RRN3         | NM_018427    | 189.7560679 | 5.720422273 | 3.02E-17    | 33.17168888 |
| ZNF641       | NM_001172681 | 142.098925  | 12.65209637 | 1.98E-10    | 11.23125535 |
| MATR3        | NM_018834    | 185.7846393 | 8.243578841 | 2.34E-16    | 22.53689119 |
| NFKBIB       | NR_040515    | 67.83522867 | 8.658582687 | 0.000132862 | 7.834449484 |
| POLI         | NM_007195    | 186.1055823 | 3.950119609 | 5.81E-19    | 47.11391064 |
| NAA30        | NM_001011713 | 141.06595   | 3.063629971 | 2.06E-14    | 46.04536166 |
| PBDC1        | NM_016500    | 88.40440358 | 7.922844643 | 1.47E-06    | 11.15816447 |
| ZDHHC16      | NM_198044    | 161.0835644 | 22.92492692 | 3.63E-09    | 7.026568282 |
| ATRIP        | NM_001271022 | 93.56927864 | 18.39546364 | 6.27E-05    | 5.086540925 |
| LSM6         | NM_007080    | 160.0505893 | 6.377680552 | 2.08E-14    | 25.09542271 |
| INIP         | NM_021218    | 178.8747572 | 7.725124459 | 4.92E-16    | 23.15493532 |
| CDC14A       | NM_033312    | 250.3604715 | 3.52865315  | 7.21E-25    | 70.95071712 |
| ZNF552       | NM_024762    | 204.6088072 | 18.41417279 | 6.16E-15    | 11.11148513 |
| PRKCQ        | NM_001282644 | 63.54285714 | 2.008160015 | 1.04E-05    | 31.64232764 |
| KIAA0430     | NM_001184999 | 84.43297501 | 9.298878819 | 2.55E-06    | 9.079909165 |
| ZNF324B      | NM_207395    | 137.2549929 | 13.93442376 | 9.08E-10    | 9.850065946 |
| FAM168A      | NM_015159    | 88.56487506 | 5.206849482 | 3.11E-07    | 17.00930195 |
| DHX40        | NM_001166301 | 75.61761433 | 7.830161635 | 2.57E-05    | 9.657222655 |
| ZDHHC8P1     | NR_003950    | 117.2373786 | 8.573925899 | 2.01E-09    | 13.67371027 |
| GTF2B        | NM_001514    | 144.1648751 | 6.07317313  | 3.58E-12    | 23.7379821  |
| FXR2         | NM_004860    | 73.55166431 | 14.04146563 | 0.000309982 | 5.238175718 |
| SLC16A13     | NM_201566    | 205.6417822 | 19.71973009 | 1.80E-14    | 10.42822499 |
| TTLL13       | NR_104604    | 117.3978501 | 14.84778297 | 7.80E-08    | 7.906759566 |
| LPCAT4       | NM_153613    | 53.69452145 | 9.241756389 | 0.002719187 | 5.809991001 |
| COMMD5       | NM_014066    | 225.6593965 | 49.72442435 | 3.54E-09    | 4.53820028  |
| MIDN         | NM_177401    | 402.1472607 | 51.65443749 | 2.35E-23    | 7.78533811  |
| MSRB1        | NM_016332    | 154.1736822 | 18.29383199 | 9.36E-10    | 8.42763191  |
| SNRPE        | NM_003094    | 104.4505893 | 10.13181783 | 1.37E-07    | 10.30916575 |
| MDH2         | NM_001282404 | 151.0747572 | 15.3347085  | 1.33E-10    | 9.851817998 |
| CDC40        | NM_015891    | 129.3121358 | 3.776273218 | 9.76E-12    | 34.24332095 |
| C15orf57     | NM_001080792 | 203.7363036 | 8.845796232 | 3.11E-18    | 23.0319915  |
| LYSMD2       | NM_153374    | 78.55606789 | 6.227056848 | 5.72E-06    | 12.61528035 |
| PITPNA-AS1   | NR_028514    | 206.6747572 | 25.96355337 | 2.99E-10    | 7.960187662 |
| TMCO3        | NM_017905    | 148.1363036 | 7.658851455 | 2.42E-12    | 19.34184316 |
| ATG4C        | NM_032852    | 122.4022537 | 2.106875081 | 2.86E-12    | 58.09658805 |
| ZNF81        | NM_007137    | 64.57583215 | 3.572503929 | 5.35E-06    | 18.07579038 |
| SREBF2       | NM_004599    | 101.3516643 | 11.81382298 | 7.21E-07    | 8.579074234 |
| STX18        | NM_016930    | 157.1121358 | 4.764814438 | 5.08E-14    | 32.97340071 |
| TMX2         | NM_015959    | 85.6264215  | 7.861512876 | 1.78E-06    | 10.89185032 |
| LIAS         | NM_001278591 | 162.1165394 | 16.84223834 | 7.20E-11    | 9.625593466 |

|              |              |             |             |             |             |
|--------------|--------------|-------------|-------------|-------------|-------------|
| CUL9         | NM_015089    | 106.3560679 | 11.03053003 | 1.75E-07    | 9.64197256  |
| CDKN2A       | NM_058195    | 60.60440358 | 4.625977202 | 8.01E-05    | 13.10088678 |
| TWSG1        | NM_020648    | 156.9516643 | 4.656638178 | 2.19E-14    | 33.70493011 |
| IFT22        | NM_001287525 | 77.52309288 | 12.66452081 | 9.39E-05    | 6.121281182 |
| RHNO1        | NM_001257098 | 187.8505893 | 13.12275658 | 5.21E-15    | 14.31487266 |
| ZNF548       | NM_152909    | 89.59785007 | 8.327334935 | 2.04E-06    | 10.75948677 |
| LOC257396    | NR_034107    | 190.7890429 | 12.47903721 | 7.09E-16    | 15.28876304 |
| DIDO1        | NM_001193370 | 92.53630363 | 12.57247934 | 1.31E-05    | 7.360227136 |
| PTPN18       | NM_014369    | 99.60665724 | 20.22489377 | 6.32E-05    | 4.924953296 |
| CWC25        | NM_017748    | 61.79785007 | 6.387094015 | 0.000209869 | 9.67542515  |
| ANAPC4       | NM_013367    | 296.1121358 | 6.105846012 | 1.09E-28    | 48.49649585 |
| VAMP1        | NM_199245    | 175.9363036 | 18.98755538 | 8.71E-12    | 9.265874419 |
| NT5DC1       | NM_152729    | 281.2593965 | 3.525211929 | 7.53E-28    | 79.7851029  |
| SLMO2        | NM_016045    | 152.1077322 | 7.483197315 | 7.33E-14    | 20.32656975 |
| CFL1P1       | NR_028492    | 138.2879679 | 4.730629554 | 4.36E-13    | 29.23246607 |
| FBXO3        | NM_033406    | 62.67035361 | 3.376245311 | 5.37E-06    | 18.56214458 |
| TMEM254-AS1  | NR_027432    | 123.4352287 | 7.201734543 | 3.96E-10    | 17.13965267 |
| ERMAP        | NM_001017922 | 59.57142857 | 6.460942944 | 9.68E-05    | 9.220237523 |
| COX7A2L      | NM_004718    | 83.56047148 | 9.628092336 | 7.28E-06    | 8.67881908  |
| MON2         | NM_001278472 | 177.8417822 | 1.799826532 | 6.21E-18    | 98.81051256 |
| ATRX         | NM_000489    | 142.9714286 | 2.099828353 | 1.15E-13    | 68.08719787 |
| RPAP2        | NM_024813    | 278.1604715 | 3.721204445 | 5.09E-27    | 74.75011804 |
| LETMD1       | NR_045018    | 203.5758322 | 14.28144656 | 1.15E-15    | 14.25456667 |
| KDM6A        | NM_001291416 | 49.72309288 | 2.234035211 | 0.000288189 | 22.25707663 |
| EDF1         | NM_003792    | 107.3890429 | 21.08209592 | 2.09E-05    | 5.093850408 |
| MAN1B1       | NR_045720    | 167.9934465 | 10.80556097 | 3.60E-13    | 15.54694356 |
| SIN3A        | NM_015477    | 69.58023574 | 7.614014101 | 9.67E-05    | 9.138443246 |
| TSEN15       | NR_125335    | 255.3648751 | 4.319863794 | 9.51E-27    | 59.11410341 |
| CALCOCO2     | NM_001261395 | 206.8352287 | 8.371973933 | 1.31E-17    | 24.70567041 |
| BPGM         | NM_199186    | 217.5560679 | 5.274274505 | 1.33E-20    | 41.24852958 |
| PITPNB       | NM_001284277 | 72.5186893  | 4.418845734 | 9.50E-06    | 16.41122901 |
| CCT2         | NM_001198842 | 177.8417822 | 8.060749564 | 9.14E-16    | 22.06268546 |
| C7orf49      | NM_001243751 | 211.8396323 | 39.19465897 | 3.28E-10    | 5.40480866  |
| TRAF4        | NM_004295    | 156.9516643 | 33.38475112 | 3.58E-07    | 4.70129802  |
| UPF3A        | NM_023011    | 130.3451108 | 12.73901398 | 2.38E-09    | 10.2319623  |
| PTPN6        | NM_080548    | 212.5516643 | 15.18711196 | 3.90E-16    | 13.9955289  |
| EPHX2        | NM_001256482 | 199.9253465 | 11.00930328 | 2.41E-16    | 18.15967292 |
| SNX22        | NR_073534    | 196.66595   | 27.837347   | 1.46E-11    | 7.064823742 |
| PEX19        | NR_036493    | 74.7451108  | 10.68002352 | 0.000145151 | 6.998590465 |
| CENPM        | NM_024053    | 129.3121358 | 21.46847792 | 3.98E-07    | 6.023349036 |
| NMT2         | NM_004808    | 257.2703536 | 9.68866416  | 6.74E-22    | 26.55374873 |
| SCAMP4       | NM_079834    | 120.3363036 | 12.20485575 | 2.27E-08    | 9.859707162 |
| RPS16        | NM_001020    | 185.9451108 | 35.41922205 | 1.37E-08    | 5.249836107 |
| SLC4A2       | NM_001199693 | 64.73630363 | 14.10507498 | 0.001292184 | 4.589575292 |
| MUL1         | NM_024544    | 149.1692786 | 14.79338126 | 1.91E-10    | 10.08351478 |
| DPH3         | NM_206831    | 112.232975  | 8.609603147 | 1.52E-08    | 13.03578958 |
| ZNF354A      | NM_005649    | 121.2088072 | 7.238279599 | 3.23E-10    | 16.7455271  |
| SNX6         | NM_152233    | 179.9077322 | 6.738779997 | 1.90E-15    | 26.69737434 |
| HAX1         | NM_001018837 | 97.54070721 | 12.10497479 | 1.97E-06    | 8.05790255  |
| SYS1         | NM_001099791 | 121.3692786 | 10.27181033 | 9.70E-09    | 11.81576322 |
| ZKSCAN4      | NM_019110    | 86.65939651 | 13.95572835 | 4.79E-05    | 6.209593246 |
| POLD2        | NM_001127218 | 150.2022537 | 13.7756252  | 8.24E-11    | 10.90347999 |
| LOC100133315 | NR_029192    | 113.26595   | 5.514751324 | 6.05E-10    | 20.53872303 |
| RNF113A      | NM_006978    | 85.46595002 | 15.15758413 | 0.000600828 | 5.638494187 |
| RETSAT       | NM_017750    | 130.1846393 | 21.08374956 | 1.18E-07    | 6.174643603 |
| BICD1        | NM_001714    | 37.80880717 | 3.96608203  | 0.003560427 | 9.533037109 |
| LOC399815    | NR_027282    | 62.83082508 | 3.71270751  | 2.65E-05    | 16.92318205 |
| LOC100996447 | NR_104147    | 44.87916077 | 2.841781047 | 0.000315107 | 15.79261739 |
| COPS7A       | NM_001164093 | 81.65499293 | 11.86224652 | 2.27E-05    | 6.883602761 |
| MYNN         | NR_033702    | 189.7560679 | 5.234568873 | 7.30E-19    | 36.25056284 |
| NUDT4P1      | NR_002212    | 139.320943  | 9.113171653 | 4.08E-11    | 15.28786555 |
| PLEKHA5      | NM_001143821 | 55.6        | 2.672801457 | 8.31E-05    | 20.80214371 |

|              |              |             |             |             |             |
|--------------|--------------|-------------|-------------|-------------|-------------|
| M1AP         | NM_138804    | 161.0835644 | 6.597767953 | 2.43E-13    | 24.4148575  |
| TPP2         | NM_003291    | 171.8044036 | 3.70536967  | 6.78E-16    | 46.36633289 |
| ATP5J2       | NM_004889    | 193.7274965 | 20.04386795 | 6.18E-13    | 9.66517525  |
| SLC25A51     | NR_024872    | 132.2505893 | 10.26239444 | 4.05E-10    | 12.88691349 |
| XPNPEP1      | NM_001167604 | 78.71653937 | 11.69016945 | 3.80E-05    | 6.733567011 |
| MMAA         | NM_172250    | 149.0088072 | 4.902422557 | 7.06E-14    | 30.39493341 |
| ACTN1-AS1    | NR_073422    | 73.55166431 | 9.697010645 | 3.57E-05    | 7.584983352 |
| QSOX1        | NM_001004128 | 234.4747572 | 9.318253331 | 4.33E-20    | 25.16295156 |
| C2CD2L       | NM_001290474 | 145.0373786 | 11.74221441 | 6.01E-11    | 12.35179103 |
| RDH14        | NM_020905    | 111.3604715 | 11.21437768 | 6.09E-08    | 9.930151689 |
| TNFRSF10D    | NM_003840    | 274.1890429 | 11.38544857 | 1.21E-23    | 24.08241021 |
| ZRSR2        | NM_005089    | 106.3560679 | 3.072584926 | 8.44E-11    | 34.61452505 |
| PPM1H        | NM_020700    | 80.46154644 | 5.486286974 | 2.11E-06    | 14.66593833 |
| TDRKH        | NM_001083965 | 97.54070721 | 6.487464163 | 5.86E-08    | 15.0352595  |
| OSBPL8       | NM_020841    | 211.5186893 | 3.22316403  | 1.61E-20    | 65.62455008 |
| GTF2I        | NM_001518    | 98.57368223 | 5.545320788 | 2.12E-08    | 17.7760108  |
| PDIA5        | NR_028444    | 159.0176143 | 8.562966354 | 3.20E-13    | 18.57038878 |
| MAPK6        | NM_002748    | 63.70332862 | 5.238095118 | 5.84E-05    | 12.16154483 |
| ZNF544       | NM_014480    | 192.1429609 | 11.99219576 | 6.15E-15    | 16.02233359 |
| CCDC173      | NM_001085447 | 57.8264215  | 3.964513862 | 0.000187269 | 14.58600563 |
| S1PR2        | NM_004230    | 118.2703536 | 7.182857798 | 7.69E-10    | 16.46564041 |
| TMEM60       | NM_032936    | 93.56927864 | 13.08673675 | 1.04E-05    | 7.149932058 |
| DLD          | NM_001289752 | 74.7451108  | 5.979114786 | 3.83E-06    | 12.50103292 |
| SNX11        | NM_152244    | 204.9297501 | 10.9189407  | 1.30E-17    | 18.76828126 |
| RNF139-AS1   | NR_108047    | 212.7121358 | 18.50694932 | 1.99E-15    | 11.49363583 |
| GTF2A1       | NM_001278940 | 289.0417822 | 5.253665411 | 6.97E-28    | 55.01716603 |
| CDC23        | NM_004661    | 99.44618576 | 8.725156521 | 7.23E-08    | 11.39763917 |
| USP46        | NM_022832    | 79.42857143 | 4.564248906 | 1.43E-06    | 17.40233126 |
| PTGES3       | NM_006601    | 103.5780858 | 10.27223225 | 2.16E-07    | 10.0833084  |
| PDCL         | NM_005388    | 88.56487506 | 13.40949024 | 3.62E-05    | 6.604641448 |
| LACE1        | NM_145315    | 124.3077322 | 3.278909486 | 7.33E-12    | 37.91130336 |
| ITGA6        | NM_001079818 | 113.586893  | 6.113189303 | 7.77E-10    | 18.58062745 |
| LOC100288842 | NR_027442    | 217.5560679 | 11.74398161 | 1.66E-18    | 18.52489854 |
| ARL2BP       | NM_012106    | 156.0791608 | 13.63239221 | 1.77E-11    | 11.44913954 |
| LOC101927045 | NR_110032    | 67.67475719 | 3.434301854 | 2.29E-06    | 19.70553553 |
| UBAP2L       | NM_001287816 | 71.48571429 | 8.775994744 | 5.04E-05    | 8.145596752 |
| TBC1D23      | NM_001199198 | 54.88796794 | 2.743177822 | 6.24E-05    | 20.00889899 |
| DUSP19       | NM_080876    | 68.54726073 | 6.109758968 | 1.15E-05    | 11.21930686 |
| PDIA4        | NM_004911    | 131.3780858 | 10.04055231 | 3.70E-10    | 13.08474691 |
| IPO4         | NM_024658    | 193.7274965 | 21.81078095 | 1.09E-12    | 8.882189818 |
| EPM2A        | NM_001018041 | 115.3319    | 3.127263254 | 6.12E-11    | 36.87949836 |
| JMY          | NM_152405    | 43.84618576 | 3.720608727 | 0.000958612 | 11.78468068 |
| APPL2        | NM_018171    | 114.298925  | 11.43405213 | 3.51E-08    | 9.996362075 |
| IFRD1        | NR_120333    | 281.2593965 | 5.230650495 | 1.38E-28    | 53.77139933 |
| ING4         | NM_001127582 | 49.01106082 | 7.878340029 | 0.003317491 | 6.220988259 |
| TRAPPC6B     | NM_001079537 | 190.7890429 | 7.833609187 | 8.53E-17    | 24.35519035 |
| ANKRD20A5P   | NR_040113    | 39.87475719 | 1.473125889 | 0.001222297 | 27.068126   |
| GTF3A        | NM_002097    | 107.3890429 | 16.54319666 | 2.50E-06    | 6.491432407 |
| USP3         | NM_001256702 | 80.46154644 | 4.365664694 | 1.58E-06    | 18.43053741 |
| MPP1         | NM_001166462 | 85.46595002 | 4.693011365 | 1.86E-07    | 18.2113239  |
| RABGGTA      | NM_182836    | 113.4264215 | 19.65693842 | 3.92E-06    | 5.770299478 |
| PTPN4        | NM_002830    | 84.59344649 | 2.658807473 | 6.62E-08    | 31.8163114  |
| POLDIP3      | NR_103820    | 154.0132108 | 15.18257883 | 1.30E-10    | 10.1440745  |
| YES1         | NM_005433    | 148.1363036 | 3.22708183  | 1.22E-14    | 45.90410515 |
| YIPF5        | NM_001024947 | 131.2176143 | 4.721671898 | 1.27E-12    | 27.79049819 |
| MAGI1        | NM_004742    | 57.8264215  | 4.91311135  | 0.000264396 | 11.769817   |
| DARS2        | NM_018122    | 146.0703536 | 6.849540131 | 1.74E-12    | 21.32557089 |
| RNF44        | NM_014901    | 65.76927864 | 13.43614173 | 0.001130503 | 4.894952729 |
| NFXL1        | NM_001278624 | 207.7077322 | 3.400652897 | 3.19E-20    | 61.07878061 |
| TIMM9        | NM_012460    | 89.59785007 | 5.697067504 | 4.48E-07    | 15.72701219 |
| A2M-AS1      | NR_026971    | 114.298925  | 11.05451177 | 3.24E-08    | 10.33957242 |
| DIAPH2       | NM_007309    | 59.57142857 | 1.306899064 | 2.31E-06    | 45.58227197 |

|              |              |             |             |             |             |
|--------------|--------------|-------------|-------------|-------------|-------------|
| HSD17B11     | NM_016245    | 96.5077322  | 4.529673347 | 2.43E-08    | 21.30567147 |
| SPAST        | NM_014946    | 142.098925  | 3.426931455 | 5.71E-14    | 41.46535374 |
| MAGI3        | NM_152900    | 37.80880717 | 2.272564424 | 0.003497408 | 16.63706726 |
| CCNC         | NM_001013399 | 193.8879679 | 5.675522622 | 2.40E-18    | 34.16213464 |
| KIF4A        | NM_012310    | 65.60880717 | 3.353434781 | 5.94E-06    | 19.56465876 |
| NIPSNAP1     | NM_003634    | 137.2549929 | 12.75818715 | 7.61E-10    | 10.75818933 |
| RALY         | NM_016732    | 80.78248939 | 11.42073107 | 4.04E-05    | 7.07332034  |
| LGMN         | NM_001008530 | 194.7604715 | 7.748129499 | 3.87E-17    | 25.13645022 |
| DCAF16       | NM_017741    | 273.3165394 | 7.485336038 | 2.13E-27    | 36.51359645 |
| RPL14        | NM_003973    | 186.8176143 | 24.12571081 | 2.04E-11    | 7.743507156 |
| PPAPDC1B     | NM_032483    | 184.7516643 | 15.55781973 | 9.62E-14    | 11.87516423 |
| LACC1        | NM_001128303 | 75.61761433 | 5.951374877 | 1.03E-05    | 12.70590677 |
| CAPN10       | NM_023085    | 67.67475719 | 6.038557069 | 3.34E-05    | 11.20710733 |
| CBWD2        | NM_172003    | 38.84178218 | 1.257869884 | 0.001245133 | 30.87901434 |
| MUT          | NM_000255    | 85.46595002 | 1.952438697 | 7.55E-09    | 43.77394803 |
| POLH         | NM_006502    | 286.1033286 | 8.652159575 | 1.87E-25    | 33.06727368 |
| UQCRB        | NR_045639    | 194.2089109 | 18.64433131 | 1.69E-13    | 10.41651254 |
| TBC1D4       | NM_001286658 | 148.1363036 | 3.161324284 | 3.16E-14    | 46.85893958 |
| SPTBN1       | NM_003128    | 87.37142857 | 6.911508312 | 3.29E-07    | 12.64144158 |
| MATN2        | NM_002380    | 108.4220179 | 9.114782614 | 2.77E-08    | 11.89518418 |
| LMTK2        | NM_014916    | 167.120943  | 6.574044678 | 8.30E-15    | 25.42132753 |
| ENTPD4       | NM_004901    | 132.0901179 | 6.909617477 | 3.91E-11    | 19.11684957 |
| RNF145       | NM_001199380 | 58.69892504 | 3.848015401 | 1.73E-05    | 15.25433734 |
| POLE2        | NM_001197331 | 103.4176143 | 6.292887288 | 4.01E-08    | 16.43404841 |
| CARF         | NM_024744    | 94.44178218 | 2.808107674 | 4.68E-09    | 33.63182368 |
| HRH1         | NM_001098213 | 78.55606789 | 7.526480337 | 1.81E-05    | 10.43729132 |
| CFAP36       | NM_080667    | 99.44618576 | 7.360698226 | 6.00E-08    | 13.51042832 |
| MRPS16       | NM_016065    | 177.8417822 | 23.54932645 | 1.44E-10    | 7.551884022 |
| PDE12        | NM_177966    | 150.2022537 | 11.58839465 | 9.22E-12    | 12.96143756 |
| FBXO22       | NM_147188    | 263.3077322 | 6.56277417  | 2.11E-25    | 40.1214068  |
| NDUFB5       | NM_001199958 | 139.320943  | 5.231258221 | 9.31E-13    | 26.63239646 |
| CAMKMT       | NM_024766    | 231.5363036 | 2.94354963  | 3.63E-22    | 78.65887541 |
| LOC101928436 | NM_001286997 | 36.77583215 | 1.983809451 | 0.00316596  | 18.53798617 |
| SCML2        | NM_006089    | 81.49452145 | 2.37734429  | 9.12E-08    | 34.27964632 |
| ESPN         | NM_031475    | 261.2417822 | 26.5357522  | 3.95E-17    | 9.844898319 |
| SMS          | NM_001258423 | 60.60440358 | 4.067998945 | 0.000104942 | 14.89784152 |
| PUS7L        | NM_001098615 | 98.41321075 | 2.677886396 | 5.26E-10    | 36.75033075 |
| PHLDA3       | NM_012396    | 208.5802357 | 20.03055713 | 2.01E-14    | 10.41310206 |
| MORC4        | NM_001085354 | 61.6373786  | 3.030037853 | 8.37E-06    | 20.34211505 |
| STIM2        | NM_001169118 | 165.9274965 | 3.284435789 | 5.02E-16    | 50.51933029 |
| SLC39A3      | NM_144564    | 97.54070721 | 8.81229629  | 5.05E-07    | 11.06870491 |
| VASP         | NM_003370    | 175.9363036 | 14.65265861 | 4.08E-13    | 12.00712501 |
| PHF14        | NR_033436    | 88.56487506 | 2.258437957 | 3.05E-08    | 39.21510209 |
| POMGNT1      | NM_017739    | 136.2220179 | 16.00715455 | 4.18E-09    | 8.510070762 |
| CMTM7        | NM_181472    | 169.898925  | 8.068050633 | 2.90E-14    | 21.05823733 |
| ICT1         | NM_001545    | 274.3495144 | 20.30185378 | 2.10E-20    | 13.51352036 |
| RAB23        | NM_001278667 | 203.7363036 | 8.462598161 | 2.91E-17    | 24.07491172 |
| MRPL17       | NM_022061    | 193.7274965 | 18.2316003  | 1.35E-13    | 10.62591837 |
| TMC6         | NM_001127198 | 225.6593965 | 15.46029382 | 1.90E-17    | 14.59606131 |
| SLC25A36     | NM_018155    | 217.5560679 | 2.739098104 | 5.75E-23    | 79.42616861 |
| PHLDA2       | NM_003311    | 274.1890429 | 28.23001781 | 1.26E-14    | 9.712676937 |
| RBP1         | NM_001130993 | 106.5165394 | 13.50919933 | 1.39E-06    | 7.884741111 |
| UBXN11       | NM_001077262 | 58.69892504 | 12.7459181  | 0.004091656 | 4.605311645 |
| TMEM17       | NM_198276    | 89.59785007 | 8.320859995 | 5.72E-07    | 10.76785935 |
| UAP1         | NM_003115    | 153.1407072 | 7.410929137 | 3.28E-13    | 20.66417104 |
| LOC101928794 | NR_111908    | 87.53190005 | 3.53208523  | 1.13E-08    | 24.78193315 |
| BTBD10       | NM_032320    | 194.920943  | 3.726607694 | 2.12E-18    | 52.30519522 |
| STX3         | NM_001178040 | 49.01106082 | 9.091201805 | 0.004623184 | 5.391043106 |
| SERPINE1     | NM_000602    | 171.8044036 | 13.22384224 | 3.33E-13    | 12.99201854 |
| PHF21A       | NM_001101802 | 76.65058935 | 3.258072079 | 4.76E-07    | 23.5263639  |
| OSR2         | NM_001142462 | 325.9780858 | 17.49882252 | 4.99E-27    | 18.6285726  |
| TFDP2        | NM_001178138 | 166.8       | 2.811092072 | 5.43E-16    | 59.33637026 |

|          |              |             |             |             |             |
|----------|--------------|-------------|-------------|-------------|-------------|
| ZC3H6    | NM_198581    | 155.2066572 | 3.483576124 | 2.25E-14    | 44.55382966 |
| RGPD5    | NM_005054    | 347.7407072 | 17.09271301 | 2.32E-27    | 20.34438342 |
| PRKD2    | NM_001079880 | 68.54726073 | 11.44311583 | 0.000326921 | 5.990261896 |
| ASAP3    | NM_001143778 | 73.55166431 | 8.708159288 | 2.86E-05    | 8.446292939 |
| ANGPTL4  | NR_104213    | 304.9274965 | 18.37017408 | 2.82E-24    | 16.59905318 |
| MPC1     | NM_016098    | 126.3736822 | 3.587045857 | 1.06E-12    | 35.23057336 |
| HDAC2    | NR_033441    | 204.6088072 | 2.394805983 | 3.50E-22    | 85.43857359 |
| TOM1     | NM_001135729 | 79.5890429  | 11.16920662 | 3.61E-05    | 7.125756164 |
| FAM115A  | NM_001206938 | 249.3274965 | 6.167577415 | 6.28E-23    | 40.42551551 |
| HERC3    | NM_001271602 | 46.78463932 | 3.290294402 | 0.000519763 | 14.21898274 |
| EIF2AK1  | NM_014413    | 102.3846393 | 10.69355983 | 2.92E-07    | 9.57442058  |
| ERAP1    | NM_016442    | 105.3230929 | 5.755908985 | 3.58E-09    | 18.29825544 |
| SLAIN2   | NM_020846    | 100.3186893 | 2.419712705 | 1.13E-09    | 41.45892571 |
| HMGNS5   | NM_030763    | 52.66154644 | 1.232795555 | 1.00E-05    | 42.7171774  |
| DAP3     | NM_004632    | 221.5274965 | 7.619225462 | 5.74E-20    | 29.07480525 |
| YOD1     | NM_001276320 | 78.55606789 | 16.33662656 | 0.000922431 | 4.80858564  |
| CYP24A1  | NM_001128915 | 58.85939651 | 7.175692159 | 0.000367871 | 8.20260892  |
| SLC38A7  | NM_018231    | 44.7186893  | 6.1106476   | 0.001818176 | 7.318158766 |
| C16orf95 | NM_001195125 | 300.0835644 | 9.797517541 | 6.97E-28    | 30.62853045 |
| CCDC113  | NM_001142302 | 167.9934465 | 9.351815437 | 1.02E-13    | 17.96372561 |
| BZW1     | NM_001207069 | 108.2615464 | 7.800338603 | 1.30E-08    | 13.87908294 |
| TCEA2    | NM_003195    | 137.2549929 | 23.3105955  | 2.94E-07    | 5.888094662 |
| SGSM3    | NM_015705    | 232.5692786 | 10.57833522 | 9.31E-20    | 21.98543286 |
| LUZP6    | NM_001128619 | 103.4176143 | 3.229097228 | 4.20E-10    | 32.02678861 |
| GSE1     | NM_001134473 | 76.65058935 | 17.1307223  | 0.000633055 | 4.474451689 |
| CEP55    | NM_001127182 | 167.9934465 | 5.983649624 | 4.36E-15    | 28.07541501 |
| EIF4G3   | NM_001198801 | 131.2176143 | 4.130085514 | 2.67E-12    | 31.77116161 |
| LIMA1    | NM_016357    | 162.9890429 | 5.049767805 | 1.26E-14    | 32.27654205 |
| GRHPR    | NM_012203    | 225.498925  | 21.68459597 | 1.07E-15    | 10.39903743 |
| PAWR     | NM_002583    | 200.6373786 | 3.433646321 | 5.82E-20    | 58.43274462 |
| CCDC12   | NR_102269    | 144.1648751 | 11.91911965 | 7.66E-11    | 12.09526201 |
| UNC119B  | NM_001080533 | 166.9604715 | 10.29259082 | 1.38E-13    | 16.2214232  |
| ZNF84    | NM_001289971 | 72.67916077 | 17.56985422 | 0.001503659 | 4.136583029 |
| RPS6KC1  | NM_001287221 | 145.1978501 | 2.118154501 | 4.69E-14    | 68.54922528 |
| C11orf57 | NM_001301021 | 204.7692786 | 15.39567148 | 2.57E-15    | 13.30044479 |
| NAP1L5   | NM_153757    | 82.52749646 | 12.2821832  | 0.00014279  | 6.719285581 |
| NAA35    | NM_024635    | 106.3560679 | 3.634998478 | 4.09E-10    | 29.25890301 |
| SLC3A2   | NM_001012664 | 135.1890429 | 19.8537261  | 4.01E-08    | 6.809252944 |
| THG1L    | NM_017872    | 102.3846393 | 7.278224829 | 2.14E-08    | 14.06725427 |
| RPRD2    | NM_001297673 | 121.2088072 | 5.165009999 | 2.39E-10    | 23.46729381 |
| MAVS     | NM_001206491 | 193.8879679 | 24.3033271  | 3.97E-12    | 7.977836415 |
| PUS1     | NM_001002020 | 105.3230929 | 11.89930512 | 3.35E-07    | 8.851196926 |
| DDX42    | NM_203499    | 213.7451108 | 13.61265641 | 7.41E-17    | 15.70193975 |
| PAK1     | NM_002576    | 41.78023574 | 5.412366482 | 0.004447712 | 7.719402572 |
| COMT     | NM_000754    | 114.298925  | 13.54094577 | 1.12E-07    | 8.440985361 |
| STK4     | NM_006282    | 171.8044036 | 4.788035573 | 1.78E-15    | 35.88202322 |
| PIF1     | NM_001286499 | 118.2703536 | 6.488184494 | 5.85E-10    | 18.22857438 |
| XRRA1    | NM_001270380 | 185.9451108 | 7.518946998 | 1.07E-15    | 24.73020635 |
| FKTN     | NM_001198963 | 130.1846393 | 1.289848668 | 9.62E-14    | 100.9301654 |
| SOS1     | NM_005633    | 64.57583215 | 3.706588794 | 6.16E-06    | 17.42190347 |
| TUBA4B   | NR_003063    | 143.1319    | 14.24110022 | 7.50E-10    | 10.05062094 |
| LAMTOR3  | NR_024170    | 63.54285714 | 4.186399562 | 2.53E-05    | 15.1784024  |
| SMIM15   | NM_001048249 | 165.0549929 | 0.692440427 | 5.53E-24    | 238.367066  |
| KREMEN2  | NM_024507    | 148.1363036 | 27.83755241 | 1.81E-07    | 5.32145576  |
| DSCAS    | NR_110785    | 38.84178218 | 3.382270788 | 0.001673647 | 11.48393627 |
| TEP1     | NM_007110    | 228.4373786 | 7.890692052 | 1.48E-20    | 28.95023366 |
| CRYL1    | NM_015974    | 122.2417822 | 6.200028356 | 1.45E-10    | 19.71632631 |
| GABPA    | NM_002040    | 57.8264215  | 3.717357238 | 2.86E-05    | 15.55578811 |
| ARMC2    | NM_001286609 | 124.3077322 | 6.103302094 | 7.75E-11    | 20.36729139 |
| TOR1AIP1 | NM_001267578 | 104.4505893 | 7.22922526  | 2.38E-08    | 14.4483794  |
| GLE1     | NM_001003722 | 144.3253465 | 6.676625598 | 2.02E-12    | 21.61651038 |
| PRICKLE1 | NM_153026    | 52.66154644 | 4.064870241 | 0.000153166 | 12.95528352 |

|               |              |             |             |             |             |
|---------------|--------------|-------------|-------------|-------------|-------------|
| TRIM45        | NM_025188    | 101.5121358 | 11.52507732 | 3.98E-07    | 8.807935336 |
| TOB2P1        | NR_002936    | 64.57583215 | 10.5441804  | 0.000979387 | 6.124310256 |
| MED1          | NM_004774    | 142.2593965 | 16.67541404 | 2.05E-09    | 8.531086317 |
| MRPL45        | NM_032351    | 61.79785007 | 11.02272218 | 0.00086753  | 5.606405482 |
| TXNRD3        | NM_001173513 | 188.8835644 | 4.728564712 | 4.61E-18    | 39.94522141 |
| IRAK2         | NM_001570    | 129.3121358 | 6.12311877  | 3.01E-11    | 21.11867182 |
| MPC2          | NR_026550    | 99.44618576 | 5.847193484 | 3.04E-08    | 17.00750728 |
| NOM1          | NM_138400    | 129.3121358 | 13.49280786 | 4.51E-09    | 9.583782493 |
| ZNF48         | NM_001214907 | 118.2703536 | 24.3265759  | 8.95E-06    | 4.861775619 |
| MAP2K1        | NM_002755    | 191.6615464 | 8.581261857 | 3.30E-16    | 22.33489079 |
| RFC4          | NM_002916    | 150.0417822 | 13.79590328 | 8.52E-11    | 10.87582155 |
| RCE1          | NM_005133    | 152.9802357 | 28.12687194 | 1.68E-07    | 5.438935266 |
| SPRTN         | NM_001261462 | 67.12319661 | 14.60267227 | 0.001394638 | 4.596637887 |
| B3GAT3        | NR_109991    | 153.1407072 | 22.37203684 | 4.15E-09    | 6.845183937 |
| ACVR2B        | NM_001106    | 56.63297501 | 10.93183962 | 0.002707336 | 5.180553044 |
| CAPRIN1       | NM_203364    | 226.3714286 | 6.534447147 | 1.58E-20    | 34.64278209 |
| SIRT3         | NM_012239    | 159.0176143 | 12.41470627 | 3.21E-12    | 12.80881004 |
| ICOSLG        | NM_001283052 | 109.4549929 | 9.785899741 | 2.86E-08    | 11.18496979 |
| ITSN2         | NM_006277    | 126.2132108 | 4.898718928 | 7.77E-11    | 25.76453407 |
| PXT1          | NM_152990    | 135.1890429 | 5.13291761  | 4.10E-12    | 26.33766079 |
| UNC13B        | NM_006377    | 179.0352287 | 4.371636936 | 4.97E-16    | 40.95381919 |
| CEMIP         | NM_001293304 | 54.72749646 | 7.046515125 | 0.000455816 | 7.766604555 |
| CLTCL1        | NM_001835    | 90.47035361 | 7.673527487 | 9.18E-07    | 11.78993022 |
| RPL19         | NM_000981    | 260.3692786 | 31.61887161 | 5.94E-16    | 8.234616397 |
| PAIP1         | NM_006451    | 154.1736822 | 3.500334683 | 2.56E-15    | 44.04541171 |
| LINC01124     | NR_027433    | 50.75606789 | 5.933390386 | 0.002148603 | 8.554311211 |
| LITAF         | NR_024320    | 82.68796794 | 7.295813709 | 3.89E-06    | 11.33361832 |
| SNHG20        | NR_027058    | 116.5253465 | 16.46258033 | 5.49E-07    | 7.078194559 |
| PPP1R12B      | NM_001167858 | 103.4176143 | 3.638650253 | 8.81E-10    | 28.42197165 |
| ERLEC1        | NM_001127398 | 137.0945215 | 4.401746747 | 5.45E-13    | 31.1454814  |
| CNST          | NM_152609    | 118.2703536 | 3.189864334 | 2.92E-11    | 37.07692279 |
| SLC25A46      | NM_138773    | 243.2901179 | 4.761339233 | 8.59E-25    | 51.09699309 |
| LRTOMT        | NM_001145307 | 187.8505893 | 16.02265864 | 1.29E-13    | 11.72405863 |
| MLF1          | NM_001195433 | 140.1934465 | 1.062384876 | 8.01E-17    | 131.9610714 |
| ZBED3         | NM_032367    | 125.3407072 | 7.200913336 | 9.46E-11    | 17.40622354 |
| GSKIP         | NM_016472    | 121.3692786 | 5.783965652 | 3.18E-10    | 20.98374817 |
| ANAPC7        | NM_001137664 | 134.3165394 | 11.47929389 | 1.35E-09    | 11.70076667 |
| IL4I1         | NM_001258017 | 230.5033286 | 10.43064133 | 9.08E-20    | 22.09867267 |
| DAGLB         | NM_139179    | 146.2380251 | 10.67055017 | 2.74E-11    | 13.70415046 |
| SEN3          | NM_015670    | 87.53190005 | 19.52608072 | 0.000339397 | 4.482819737 |
| TPX2          | NM_012112    | 105.4835644 | 6.168548864 | 4.71E-09    | 17.10022352 |
| RABL2B        | NM_001130923 | 162.9890429 | 13.45772127 | 5.76E-12    | 12.11119176 |
| WDR6          | NM_018031    | 143.1319    | 31.80944451 | 2.48E-06    | 4.499666757 |
| DMTF1         | NM_001142326 | 203.7363036 | 6.153112914 | 2.55E-18    | 33.11109457 |
| VMP1          | NM_030938    | 179.0352287 | 7.729985066 | 4.65E-15    | 23.16113513 |
| NADK2         | NM_001287340 | 51.7890429  | 2.044538533 | 9.39E-05    | 25.33043132 |
| CCT7          | NM_006429    | 170.9319    | 16.02825705 | 7.82E-12    | 10.66440971 |
| VWA9          | NM_001136043 | 166.9604715 | 7.219289631 | 1.41E-14    | 23.12699448 |
| MCEE          | NM_032601    | 190.7890429 | 3.509418174 | 8.40E-21    | 54.36486433 |
| RAB3D         | NM_004283    | 96.5077322  | 8.464416186 | 4.46E-07    | 11.40158164 |
| TSPAN14       | NM_001128309 | 96.34726073 | 9.194315933 | 2.50E-07    | 10.47900262 |
| BLOC1S3       | NM_212550    | 133.1230929 | 15.22913754 | 9.18E-09    | 8.741341557 |
| ZNF559-ZNF177 | NM_001172650 | 90.63082508 | 4.318342401 | 9.31E-08    | 20.9874106  |
| PIGM          | NM_145167    | 121.3692786 | 14.37474792 | 8.02E-08    | 8.443228314 |
| CD82          | NM_001024844 | 192.6945215 | 9.217853515 | 1.25E-15    | 20.90448944 |
| DDB2          | NM_001300734 | 202.7033286 | 13.52157163 | 1.64E-15    | 14.99110711 |
| ETFDH         | NM_004453    | 43.84618576 | 4.734951742 | 0.003766867 | 9.260112488 |
| RNF138        | NM_016271    | 157.9846393 | 6.014104586 | 1.17E-13    | 26.26902094 |
| MEGF6         | NM_001409    | 105.3230929 | 6.495262837 | 6.74E-09    | 16.21537042 |
| ADSS          | NM_001126    | 102.3846393 | 4.701576974 | 5.23E-09    | 21.77665917 |
| PAQR5         | NM_017705    | 65.76927864 | 7.566894276 | 0.000177756 | 8.6917137   |
| GRHL1         | NM_198182    | 92.53630363 | 4.952307805 | 9.25E-08    | 18.68549114 |



|              |              |             |             |             |             |
|--------------|--------------|-------------|-------------|-------------|-------------|
| IER5L        | NM_203434    | 261.4022537 | 33.52592109 | 9.20E-15    | 7.797019297 |
| FRA10AC1     | NM_145246    | 216.5230929 | 2.386006463 | 1.06E-23    | 90.7470689  |
| SUGCT        | NM_024728    | 92.37583215 | 1.853281852 | 2.16E-08    | 49.84445947 |
| PARL         | NM_001037639 | 174.9033286 | 5.639182365 | 3.55E-16    | 31.01572485 |
| HPSE         | NM_001098540 | 92.53630363 | 5.608420778 | 8.87E-08    | 16.49952942 |
| RBM8A        | NM_005105    | 179.9077322 | 18.29790797 | 3.92E-12    | 9.832147615 |
| CYB561D1     | NM_182580    | 164.0220179 | 16.13535926 | 1.22E-11    | 10.16537749 |
| HPCAL4       | NM_001282397 | 185.0726073 | 10.0005952  | 6.78E-16    | 18.50615923 |
| TAGLN3       | NM_001008273 | 53.85499293 | 10.54029317 | 0.003714606 | 5.109439753 |
| TPK1         | NM_001042482 | 118.2703536 | 2.013423505 | 5.33E-11    | 58.74092226 |
| CNOT4        | NM_001190849 | 180.9407072 | 3.354484113 | 1.53E-17    | 53.93995056 |
| MORF4L2-AS1  | NR_038978    | 75.61761433 | 6.872659169 | 1.11E-05    | 11.00267196 |
| KLF6         | NM_001160124 | 86.49892504 | 10.56781655 | 1.36E-05    | 8.185127423 |
| ASB7         | NM_198243    | 112.3934465 | 4.661820116 | 7.75E-10    | 24.10934864 |
| QRSL1        | NM_018292    | 76.65058935 | 2.762582043 | 1.65E-07    | 27.74599565 |
| VPS51        | NM_013265    | 156.0791608 | 9.955562536 | 1.84E-12    | 15.67758328 |
| MRGBP        | NM_018270    | 105.3230929 | 15.78449876 | 2.66E-06    | 6.67256493  |
| 11-Sep       | NM_018243    | 129.1516643 | 6.940199614 | 2.70E-10    | 18.60921465 |
| C11orf54     | NM_001286068 | 62.83082508 | 5.137055511 | 3.86E-05    | 12.2309025  |
| C1QTNF6      | NM_031910    | 91.6638001  | 19.34190685 | 0.000174203 | 4.739129435 |
| KDM5C        | NM_004187    | 95.31428571 | 5.119097576 | 3.39E-08    | 18.61935318 |
| C21orf91     | NM_001100421 | 197.698925  | 5.454944123 | 1.79E-18    | 36.24215401 |
| CDC16        | NM_003903    | 152.1077322 | 7.696894954 | 6.74E-13    | 19.7622201  |
| ZNF92        | NM_001287533 | 167.9934465 | 4.959537876 | 1.29E-16    | 33.8728024  |
| UBA3         | NM_003968    | 51.62857143 | 4.531573349 | 0.000532279 | 11.39307862 |
| RET          | NM_020975    | 156.9516643 | 8.843968084 | 3.59E-13    | 17.74674703 |
| MRPL46       | NM_022163    | 108.4220179 | 3.870606198 | 7.65E-11    | 28.01163755 |
| SMG1         | NM_015092    | 231.5363036 | 4.129589133 | 1.35E-21    | 56.0676368  |
| RIF1         | NM_001177663 | 118.5912966 | 5.131341028 | 1.61E-10    | 23.11117034 |
| VKORC1L1     | NM_173517    | 63.54285714 | 5.137542012 | 6.83E-05    | 12.36833821 |
| MTRR         | NM_002454    | 129.3121358 | 5.816718267 | 8.86E-12    | 22.23111553 |
| FAM177A1     | NM_173607    | 231.5363036 | 5.812407924 | 8.76E-22    | 39.8348338  |
| LINC00471    | NR_024079    | 237.4132108 | 10.48653732 | 9.97E-22    | 22.63980983 |
| KLHL32       | NR_104421    | 100.3186893 | 2.774502842 | 2.46E-09    | 36.15735684 |
| PAIP2        | NM_001033112 | 58.69892504 | 7.520856188 | 0.000420371 | 7.8048195   |
| HMG20A       | NM_018200    | 147.1033286 | 3.074467431 | 1.15E-14    | 47.84676758 |
| RELL1        | NM_001085400 | 160.9230929 | 6.217582011 | 2.04E-14    | 25.88194134 |
| ACOX3        | NM_003501    | 85.6264215  | 9.254107252 | 2.89E-06    | 9.252801937 |
| MINK1        | NM_153827    | 154.1736822 | 9.79201599  | 6.31E-12    | 15.74483563 |
| EBNA1BP2     | NM_001159936 | 86.49892504 | 13.56523288 | 5.24E-05    | 6.376516038 |
| BECN1        | NM_003766    | 151.0747572 | 9.748013135 | 5.08E-12    | 15.49800509 |
| SLC7A8       | NM_012244    | 166.0879679 | 8.032226716 | 4.98E-14    | 20.6776992  |
| NLRP1        | NM_014922    | 80.62201792 | 5.046474603 | 1.51E-06    | 15.97590878 |
| TXLNA        | NM_175852    | 132.2505893 | 18.57366145 | 4.44E-08    | 7.120329491 |
| RFK          | NM_018339    | 189.7560679 | 8.51596233  | 2.11E-17    | 22.28239869 |
| CCAR2        | NR_033902    | 108.4220179 | 17.00608707 | 3.54E-06    | 6.375482936 |
| DDIT4        | NM_019058    | 404.5341537 | 50.838632   | 5.40E-22    | 7.957219497 |
| GORASP1      | NR_103866    | 87.53190005 | 14.52221235 | 4.09E-05    | 6.027449394 |
| C17orf96     | NM_001130677 | 144.3253465 | 18.93393704 | 4.85E-09    | 7.622574545 |
| TGFBR2       | NM_003242    | 65.76927864 | 5.879315215 | 3.82E-05    | 11.18655426 |
| ZSCAN30      | NM_001112734 | 96.5077322  | 5.015806228 | 1.95E-08    | 19.24072179 |
| IQGAP3       | NM_178229    | 129.3121358 | 8.599791759 | 1.95E-10    | 15.03665896 |
| NR2C1        | NM_001032287 | 107.5495144 | 5.423535101 | 1.57E-09    | 19.83014996 |
| SPG11        | NM_025137    | 173.1583215 | 7.740555681 | 1.29E-14    | 22.37027013 |
| ZNF670       | NM_033213    | 202.7033286 | 3.962122291 | 4.62E-20    | 51.1602908  |
| COX14        | NM_001257133 | 122.4022537 | 19.33175381 | 3.56E-07    | 6.331668345 |
| ATIC         | NM_004044    | 133.1230929 | 7.822022862 | 3.74E-11    | 17.01901097 |
| LOC100652758 | NM_001278082 | 162.1165394 | 30.1397474  | 3.21E-07    | 5.378828734 |
| SH3RF2       | NM_152550    | 97.54070721 | 5.225786338 | 4.23E-08    | 18.6652689  |
| RDH13        | NR_027382    | 147.1033286 | 24.03550966 | 3.85E-08    | 6.120250027 |
| RPS15        | NM_001018    | 256.2373786 | 27.20953397 | 4.97E-16    | 9.417191008 |
| RPS6KB2      | NM_003952    | 158.1451108 | 18.50940574 | 3.94E-10    | 8.544040419 |

|              |              |             |             |             |             |
|--------------|--------------|-------------|-------------|-------------|-------------|
| ZKSCAN5      | NM_014569    | 62.67035361 | 11.57037008 | 0.000898333 | 5.416451953 |
| L2HGDH       | NM_024884    | 196.66595   | 4.703478965 | 1.62E-18    | 41.81286905 |
| TRIM46       | NM_001282378 | 67.67475719 | 10.33842422 | 0.000186346 | 6.545945081 |
| SMOX         | NM_175841    | 120.3363036 | 9.716058614 | 7.10E-09    | 12.3853003  |
| MFSD8        | NM_152778    | 52.82201792 | 5.3407806   | 0.000685313 | 9.890317891 |
| SH3TC1       | NM_018986    | 62.67035361 | 9.805693169 | 0.000934518 | 6.391221153 |
| ALG1         | NM_019109    | 234.4747572 | 8.913183166 | 3.23E-21    | 26.3065117  |
| HSF2         | NM_004506    | 80.62201792 | 3.806590224 | 7.56E-07    | 21.17958939 |
| CCDC107      | NM_174923    | 166.2484394 | 34.32019659 | 2.01E-07    | 4.844041    |
| ZMYND12      | NM_032257    | 110.3274965 | 7.63770005  | 4.49E-09    | 14.44512036 |
| CENPN        | NM_018455    | 206.6747572 | 20.41355306 | 1.04E-13    | 10.12438925 |
| GAD1         | NM_013445    | 87.69237152 | 8.166044421 | 9.11E-07    | 10.73865963 |
| ZMYM2        | NM_001190965 | 151.9472607 | 5.767168817 | 2.38E-13    | 26.34694172 |
| LOC100129518 | NR_037166    | 156.0791608 | 32.33332775 | 5.24E-07    | 4.827191373 |
| RAB5A        | NM_004162    | 113.26595   | 6.385244089 | 2.98E-09    | 17.73870324 |
| NOMO2        | NM_001004060 | 210.8066572 | 7.998195825 | 1.57E-18    | 26.35677618 |
| NDUFAB1      | NM_016013    | 222.720943  | 14.90496427 | 2.67E-17    | 14.94273579 |
| PDDC1        | NM_182612    | 71.48571429 | 17.2553059  | 0.002748839 | 4.142825094 |
| TMEM18       | NM_152834    | 127.2461858 | 11.57231417 | 3.32E-09    | 10.99574241 |
| ANKRD27      | NM_032139    | 87.69237152 | 8.714721371 | 1.58E-06    | 10.06255597 |
| TMEM120A     | NM_031925    | 75.61761433 | 15.23124905 | 0.000532759 | 4.964636458 |
| FRG1         | NM_004477    | 85.6264215  | 0.431524915 | 2.25E-11    | 198.4275267 |
| DPH6-AS1     | NR_038251    | 102.3846393 | 2.139095014 | 1.33E-09    | 47.86353044 |
| LSM14A       | NM_001114093 | 155.0461858 | 4.743913738 | 3.28E-14    | 32.68317982 |
| PTRH2        | NM_016077    | 103.5780858 | 23.93713654 | 7.53E-05    | 4.327087563 |
| POP7         | NM_005837    | 136.2220179 | 12.6296437  | 4.24E-09    | 10.78589556 |
| LOC728752    | NR_036504    | 74.58463932 | 9.442270912 | 0.000339856 | 7.899014974 |
| ALDH2        | NM_000690    | 182.6857143 | 6.488259607 | 3.50E-16    | 28.15635091 |
| TEKT4P2      | NR_038328    | 57.66595002 | 2.625301522 | 3.07E-05    | 21.96545788 |
| GUSBP11      | NR_024448    | 147.1033286 | 10.84032367 | 4.94E-11    | 13.57001259 |
| MIR22HG      | NR_028505    | 189.7560679 | 20.68352287 | 1.11E-12    | 9.174262482 |
| BTBD1        | NM_025238    | 165.0549929 | 7.011612534 | 3.30E-14    | 23.54023303 |
| MBTPS2       | NM_015884    | 97.38023574 | 2.641300063 | 1.13E-09    | 36.86829721 |
| STAM-AS1     | NR_110370    | 122.4022537 | 4.313191988 | 5.97E-12    | 28.37857763 |
| SSX2IP       | NM_001166294 | 50.75606789 | 4.508394962 | 0.000654152 | 11.25812364 |
| SLC25A21     | NM_030631    | 105.3230929 | 2.338251025 | 8.28E-10    | 45.04353543 |
| LOC100233156 | NR_037871    | 107.3890429 | 2.521453164 | 8.39E-11    | 42.59013987 |
| COPE         | NM_199442    | 156.0791608 | 13.23748282 | 3.08E-11    | 11.79069789 |
| UNC93B1      | NM_030930    | 59.73190005 | 13.39682111 | 0.00353693  | 4.458662212 |
| HMCES        | NM_020187    | 121.2088072 | 5.942122629 | 4.07E-10    | 20.39823389 |
| CHRAC1       | NM_017444    | 230.6638001 | 54.94210134 | 2.74E-09    | 4.198306844 |
| ASCC2        | NM_001242906 | 150.2022537 | 12.16285682 | 6.25E-11    | 12.34925774 |
| ZNF148       | NM_021964    | 60.60440358 | 2.59957615  | 2.13E-05    | 23.31318649 |
| KIAA0391     | NM_014672    | 160.0505893 | 3.276013532 | 1.74E-15    | 48.85528944 |
| SLC18B1      | NM_052831    | 150.2022537 | 4.95805593  | 1.44E-14    | 30.29458638 |
| FAM83F       | NM_138435    | 88.56487506 | 8.456841853 | 1.14E-06    | 10.4725708  |
| C12orf66     | NM_152440    | 165.9274965 | 5.323088224 | 4.67E-15    | 31.17128431 |
| ARMC1        | NM_001286702 | 205.9627251 | 7.575828128 | 8.57E-19    | 27.18682653 |
| ZBTB8A       | NR_111980    | 71.64618576 | 6.92468037  | 5.09E-05    | 10.34649716 |
| FCHO2        | NM_138782    | 55.76047148 | 1.54324815  | 3.41E-05    | 36.13188939 |
| PRRC1        | NM_130809    | 116.2044036 | 3.916168298 | 9.77E-11    | 29.67298511 |
| MAN2C1       | NM_001256496 | 331.8549929 | 21.03289325 | 6.68E-26    | 15.77790507 |
| CEP68        | NM_015147    | 88.56487506 | 17.8112265  | 0.000203285 | 4.972418664 |
| FHOD3        | NM_025135    | 56.63297501 | 4.009928848 | 4.78E-05    | 14.12318701 |
| BIRC5        | NM_001012271 | 181.1011787 | 24.27608702 | 6.60E-11    | 7.460064652 |
| ZNF622       | NM_033414    | 140.1934465 | 6.701521234 | 7.10E-13    | 20.9196452  |
| D2HGDH       | NM_001287249 | 196.66595   | 14.09295656 | 1.29E-14    | 13.95491068 |
| C17orf75     | NM_022344    | 171.8044036 | 6.594873462 | 9.02E-16    | 26.05120547 |
| STEAP3       | NM_001008410 | 202.8638001 | 11.72555638 | 6.41E-16    | 17.30099566 |
| RNF181       | NM_016494    | 142.098925  | 24.99549371 | 7.06E-07    | 5.684981729 |
| ZNF749       | NM_001023561 | 113.26595   | 7.015737572 | 1.83E-09    | 16.14455342 |
| SLC25A40     | NM_018843    | 130.1846393 | 2.023097707 | 4.39E-14    | 64.34916064 |

|               |              |             |             |             |             |
|---------------|--------------|-------------|-------------|-------------|-------------|
| PRR13         | NM_018457    | 174.9033286 | 16.18207079 | 4.16E-12    | 10.80846394 |
| ZNF428        | NM_182498    | 277.4484394 | 18.85435722 | 2.60E-21    | 14.71534861 |
| C7orf60       | NM_152556    | 137.0945215 | 3.209665914 | 2.93E-13    | 42.71301909 |
| P4HB          | NM_000918    | 142.2593965 | 29.71717361 | 6.35E-07    | 4.787110591 |
| SHMT1         | NM_004169    | 107.3890429 | 11.96249129 | 3.92E-07    | 8.977147007 |
| ELOVL7        | NM_024930    | 178.0022537 | 3.688269768 | 2.17E-16    | 48.26172294 |
| TMEM126A      | NM_032273    | 104.4505893 | 10.40227356 | 1.18E-07    | 10.04113079 |
| HES2          | NM_019089    | 161.9560679 | 20.96135867 | 5.24E-10    | 7.726410795 |
| SRSF7         | NM_001031684 | 278.1604715 | 22.88938006 | 5.96E-20    | 12.15238118 |
| FBL           | NM_001436    | 159.8901179 | 9.85965885  | 3.57E-13    | 16.21659738 |
| CCDC87        | NM_018219    | 121.3692786 | 2.406329463 | 2.93E-13    | 50.4375151  |
| TCEA1         | NM_201437    | 106.3560679 | 4.288679516 | 3.15E-09    | 24.79925756 |
| CA2           | NM_000067    | 161.0835644 | 7.050664743 | 6.76E-14    | 22.84657833 |
| LOC100288069  | NR_033908    | 152.9802357 | 2.977216423 | 1.93E-17    | 51.38364633 |
| NDUFS3        | NM_004551    | 184.9121358 | 17.04802285 | 5.13E-13    | 10.84654434 |
| YWHAE         | NR_024058    | 230.5033286 | 9.432417254 | 1.63E-19    | 24.43735496 |
| ERI2          | NM_080663    | 202.8638001 | 4.060133462 | 3.49E-21    | 49.96481076 |
| PMS2P1        | NR_003613    | 259.1758322 | 6.887952861 | 4.92E-26    | 37.62741084 |
| FIBP          | NM_004214    | 205.6417822 | 16.9388423  | 5.20E-15    | 12.14025012 |
| HOMER1        | NM_001277077 | 49.72309288 | 3.15510885  | 0.000282048 | 15.75954911 |
| GRN           | NM_002087    | 98.57368223 | 23.18615125 | 0.000103032 | 4.251403399 |
| WBP5          | NM_016303    | 115.3319    | 4.712165859 | 1.90E-10    | 24.47534818 |
| DYNLT1        | NM_006519    | 175.9363036 | 14.19859121 | 1.33E-13    | 12.39110987 |
| ADAM19        | NM_033274    | 85.6264215  | 6.159654067 | 5.14E-07    | 13.90117376 |
| SDR42E1       | NM_145168    | 209.7736822 | 10.07593854 | 2.69E-18    | 20.81926972 |
| JMJD6         | NM_015167    | 139.1604715 | 25.31143628 | 4.38E-07    | 5.49792868  |
| CRTAP         | NM_006371    | 56.63297501 | 9.340242412 | 0.000836907 | 6.06333032  |
| ACOXL         | NM_001142807 | 110.3274965 | 5.291408208 | 2.41E-09    | 20.85030905 |
| LCA5          | NM_181714    | 81.65499293 | 1.118293086 | 1.37E-08    | 73.01752464 |
| PARP3         | NM_005485    | 167.9934465 | 14.00938913 | 1.82E-12    | 11.99148978 |
| PIP5K1A       | NM_003557    | 182.8461858 | 10.55697448 | 9.49E-15    | 17.319942   |
| CDC7          | NM_003503    | 143.2923715 | 6.861793971 | 1.82E-12    | 20.88263975 |
| LACTB2        | NM_016027    | 222.5604715 | 4.553293562 | 8.78E-23    | 48.87900778 |
| ABI2          | NM_001282925 | 75.77808581 | 3.891013125 | 4.18E-07    | 19.47515554 |
| PCM1          | NM_006197    | 109.4549929 | 4.447562098 | 2.82E-09    | 24.6101101  |
| UIMC1         | NM_001199297 | 164.8945215 | 6.332746733 | 7.94E-15    | 26.03838878 |
| CBLC          | NM_001130852 | 168.3143894 | 12.26966899 | 5.02E-13    | 13.71792422 |
| LOC101929099  | NR_110786    | 66.64178218 | 4.516968385 | 2.48E-05    | 14.75365256 |
| IL17RA        | NM_001289905 | 144.1648751 | 10.62476923 | 3.85E-11    | 13.56875354 |
| LOXL2         | NM_002318    | 160.9230929 | 7.065281165 | 3.02E-13    | 22.7766014  |
| DFNB59        | NM_001042702 | 109.4549929 | 4.71301121  | 3.39E-10    | 23.22400437 |
| YIF1A         | NM_020470    | 119.3033286 | 20.72082611 | 2.21E-06    | 5.757653098 |
| WIBG          | NM_001143853 | 102.3846393 | 5.706755963 | 3.38E-09    | 17.94095279 |
| DHX57         | NM_198963    | 132.0901179 | 5.727545069 | 1.47E-11    | 23.06225726 |
| BEX2          | NM_001168399 | 89.4373786  | 7.561875516 | 5.36E-06    | 11.82740689 |
| HNRNPD        | NM_031369    | 93.72975012 | 7.253563052 | 1.76E-07    | 12.92189086 |
| PGBD1         | NM_001184743 | 101.3516643 | 5.485812979 | 4.68E-09    | 18.47523142 |
| RPL23AP7      | NR_024528    | 109.4549929 | 2.338871262 | 1.89E-11    | 46.79821191 |
| NDUFAF7       | NM_144736    | 132.2505893 | 8.77271436  | 1.51E-10    | 15.0752189  |
| CGGBP1        | NM_001008390 | 215.6505893 | 9.58644311  | 2.67E-19    | 22.49537048 |
| ANKRD44       | NM_001195144 | 48.69011787 | 2.843165282 | 0.000300706 | 17.12532091 |
| KBTBD2        | NM_015483    | 60.60440358 | 5.272663842 | 8.04E-05    | 11.49407688 |
| LOC100294362  | NR_029376    | 135.3495144 | 11.25330966 | 5.08E-10    | 12.02752954 |
| OSGEP         | NM_017807    | 77.68356436 | 15.79682173 | 0.000320696 | 4.917670508 |
| SYNJ2BP-COX16 | NM_001202547 | 105.3230929 | 7.408694606 | 4.09E-08    | 14.21614717 |
| H2AFJ         | NM_177925    | 107.3890429 | 11.7295455  | 1.22E-07    | 9.155430862 |
| HYKK          | NM_001083612 | 231.5363036 | 6.238233299 | 4.31E-22    | 37.11568525 |
| THR3          | NM_000461    | 81.65499293 | 2.974685066 | 1.46E-07    | 27.44996231 |
| MED21         | NM_001271811 | 171.9648751 | 3.708616296 | 9.85E-19    | 46.36901242 |
| RHBDD3        | NM_012265    | 97.54070721 | 19.39365674 | 5.93E-05    | 5.029516017 |
| TMEM39B       | NM_018056    | 194.7604715 | 8.047424332 | 1.21E-16    | 24.2015909  |
| TUBGCP3       | NM_001286277 | 207.7077322 | 6.35599436  | 4.53E-19    | 32.67903029 |

|             |              |             |             |             |             |
|-------------|--------------|-------------|-------------|-------------|-------------|
| COBLL1      | NM_001278461 | 35.90332862 | 2.320931641 | 0.003372872 | 15.46936066 |
| DUSP1       | NM_004417    | 294.0461858 | 27.10898136 | 9.11E-20    | 10.84681795 |
| UBAP2       | NM_001282529 | 249.4879679 | 8.050161086 | 1.25E-21    | 30.99167399 |
| DSG2        | NM_001943    | 123.1142857 | 3.413122131 | 2.92E-12    | 36.0708703  |
| STAT1       | NM_007315    | 265.3736822 | 11.36950499 | 5.14E-22    | 23.34082991 |
| GALK2       | NM_001289030 | 43.84618576 | 3.316236486 | 0.001001629 | 13.22167039 |
| SNAP47      | NM_053052    | 175.9363036 | 11.47655552 | 3.30E-14    | 15.33006165 |
| MAST2       | NM_015112    | 120.1758322 | 4.669235132 | 3.18E-10    | 25.73779833 |
| AGTRAP      | NM_001040195 | 166.9604715 | 9.741236324 | 1.65E-13    | 17.13955662 |
| SNF8        | NM_007241    | 208.7407072 | 33.77940177 | 2.28E-11    | 6.179526465 |
| USP20       | NM_006676    | 91.50332862 | 9.026376379 | 7.27E-07    | 10.13732696 |
| CYP4F11     | NM_001128932 | 107.3890429 | 5.521191194 | 6.14E-10    | 19.45033945 |
| XRCC5       | NM_021141    | 129.3121358 | 7.700189919 | 3.01E-10    | 16.79336966 |
| GRK4        | NM_182982    | 90.47035361 | 5.640906473 | 1.28E-07    | 16.03826513 |
| PIAS1       | NM_016166    | 91.50332862 | 3.604292797 | 1.63E-08    | 25.38731834 |
| SLC50A1     | NM_001122837 | 253.4593965 | 37.20631149 | 1.55E-13    | 6.812268842 |
| DCTN5       | NM_001199743 | 153.1407072 | 10.74158985 | 3.20E-12    | 14.25680084 |
| DSCC1       | NM_024094    | 218.7495144 | 14.10903552 | 2.72E-17    | 15.5042146  |
| PTBP3       | NM_001244898 | 46.78463932 | 2.358082093 | 0.000493618 | 19.84012324 |
| PAIP2B      | NM_020459    | 108.5824894 | 4.86253281  | 1.42E-09    | 22.3304384  |
| CILP2       | NM_153221    | 152.9802357 | 14.71910293 | 4.27E-11    | 10.39331245 |
| PAQR8       | NM_133367    | 54.72749646 | 6.52971567  | 0.000387227 | 8.381298548 |
| SENP1       | NR_051992    | 145.1978501 | 4.38039628  | 2.75E-13    | 33.14719509 |
| NUDT9       | NM_001248011 | 130.1846393 | 4.628258758 | 3.68E-12    | 28.12821109 |
| OPTN        | NM_001008212 | 120.3363036 | 5.924126986 | 9.73E-11    | 20.31291765 |
| ZNF367      | NM_153695    | 149.1692786 | 3.83137597  | 1.89E-14    | 38.933605   |
| SLC25A47    | NM_207117    | 46.78463932 | 7.872204813 | 0.00449051  | 5.943016021 |
| SNHG16      | NR_038111    | 212.8726073 | 19.28774084 | 3.60E-15    | 11.03667915 |
| WIP1I       | NM_017983    | 121.2088072 | 14.78901935 | 1.68E-07    | 8.195865076 |
| CDC42EP4    | NM_012121    | 262.2747572 | 18.44967079 | 2.72E-19    | 14.21568765 |
| KAT2B       | NM_003884    | 46.78463932 | 5.319501123 | 0.002472915 | 8.794929871 |
| TBC1D15     | NM_022771    | 150.0417822 | 3.727766857 | 9.03E-14    | 40.24977632 |
| ZNF75D      | NM_007131    | 53.85499293 | 2.011171714 | 5.17E-05    | 26.77791884 |
| PRPS2       | NM_002765    | 110.3274965 | 5.015788734 | 4.89E-10    | 21.99604137 |
| CD164L2     | NM_207397    | 82.52749646 | 15.31933232 | 0.000136038 | 5.387147087 |
| CHCHD1      | NM_203298    | 146.0703536 | 26.15269747 | 1.10E-06    | 5.585288239 |
| MRPL19      | NM_014763    | 91.50332862 | 5.112803426 | 2.09E-08    | 17.89689941 |
| UPF1        | NM_002911    | 78.55606789 | 13.15165188 | 0.000200316 | 5.973095135 |
| COL4A4      | NM_000092    | 66.80225365 | 5.073628507 | 4.10E-05    | 13.16656384 |
| MIR4435-1HG | NR_015395    | 49.72309288 | 8.174444707 | 0.00487747  | 6.082748696 |
| GCLC        | NM_001197115 | 106.5165394 | 6.820486914 | 2.73E-08    | 15.61714592 |
| UBL3        | NM_007106    | 138.1274965 | 2.277499888 | 9.86E-14    | 60.64873909 |
| FLYWCH1     | NM_032296    | 69.58023574 | 10.64509638 | 0.000316654 | 6.53636503  |
| ELMOD3      | NM_001135023 | 89.4373786  | 9.321290885 | 5.46E-06    | 9.594956289 |
| HEXDC       | NM_173620    | 197.698925  | 22.06850967 | 1.57E-12    | 8.958417583 |
| HUWE1       | NM_031407    | 163.8615464 | 5.733713687 | 1.99E-14    | 28.57860636 |
| TMEM185A    | NM_001282302 | 112.232975  | 3.425161618 | 1.75E-10    | 32.76720562 |
| MYH14       | NM_001077186 | 139.1604715 | 8.532127792 | 2.77E-11    | 16.31017196 |
| IGHMBP2     | NM_002180    | 204.7692786 | 8.272486476 | 1.56E-17    | 24.75305088 |
| IPO7        | NM_006391    | 156.0791608 | 8.217548691 | 4.03E-13    | 18.99339653 |
| SGSH        | NM_000199    | 195.7934465 | 17.04768885 | 3.04E-14    | 11.48504341 |
| PRORS1P     | NR_027258    | 84.59344649 | 8.602789599 | 4.27E-06    | 9.833257633 |
| RMI1        | NM_024945    | 119.4638001 | 3.846348089 | 1.49E-11    | 31.05901945 |
| PEX16       | NM_004813    | 134.1560679 | 15.66804565 | 5.55E-09    | 8.562399606 |
| UBR1        | NM_174916    | 179.0352287 | 3.697220715 | 2.02E-17    | 48.42427392 |
| COX7A2      | NR_029466    | 101.3516643 | 16.63068015 | 7.10E-06    | 6.094258526 |
| AKAP11      | NM_016248    | 62.67035361 | 4.516359282 | 5.69E-05    | 13.8762994  |
| ZNF488      | NM_153034    | 153.1407072 | 9.656826586 | 8.83E-13    | 15.8582849  |
| ZNF564      | NM_144976    | 206.6747572 | 8.566462386 | 5.86E-18    | 24.12603335 |
| SMYD4       | NM_052928    | 217.5560679 | 7.896860763 | 2.50E-19    | 27.54969024 |
| NDUFAB2     | NM_174889    | 115.4923715 | 1.817868306 | 6.60E-11    | 63.53175921 |
| KIF23       | NM_004856    | 91.6638001  | 7.497811356 | 5.52E-07    | 12.22540762 |

|              |              |             |             |             |             |
|--------------|--------------|-------------|-------------|-------------|-------------|
| ATG16L1      | NM_001190266 | 122.2417822 | 9.359157929 | 4.11E-09    | 13.06119451 |
| NRGN         | NM_006176    | 97.38023574 | 20.37047707 | 5.60E-05    | 4.780459259 |
| THOC1        | NM_005131    | 44.87916077 | 2.736338724 | 0.000425644 | 16.40117153 |
| LOC101928784 | NR_120339    | 169.0264215 | 4.43479318  | 6.96E-16    | 38.11371008 |
| QARS         | NM_005051    | 97.38023574 | 19.36533767 | 6.62E-05    | 5.028584443 |
| CRIP1        | NM_014171    | 154.0132108 | 4.067127321 | 9.37E-16    | 37.8678115  |
| DNASE2       | NM_001375    | 152.1077322 | 24.27227064 | 2.40E-08    | 6.266728584 |
| TMX3         | NM_019022    | 107.3890429 | 4.146530465 | 1.06E-09    | 25.89852982 |
| ZNF808       | NM_001039886 | 86.49892504 | 4.108079172 | 1.68E-07    | 21.0558077  |
| ATP7A        | NM_001282224 | 41.78023574 | 1.291606699 | 0.000106685 | 32.34749073 |
| CNOT2        | NM_001199303 | 93.40880717 | 2.1756371   | 5.36E-09    | 42.9340018  |
| TTC19        | NM_017775    | 220.6549929 | 10.51035853 | 4.45E-18    | 20.99405003 |
| SRSF5        | NM_001039465 | 266.4066572 | 29.97457603 | 5.88E-17    | 8.887753973 |
| EP400NL      | NR_003290    | 182.6857143 | 8.474117144 | 6.07E-16    | 21.55808224 |
| COQ2         | NM_015697    | 55.76047148 | 8.14499704  | 0.000708017 | 6.845978114 |
| DVL2         | NM_004422    | 199.7648751 | 16.3597167  | 6.46E-15    | 12.21077839 |
| CEP83        | NM_001042399 | 176.9692786 | 2.802213716 | 2.33E-17    | 63.15338392 |
| CENPBD1      | NM_145039    | 231.5363036 | 25.77640833 | 1.27E-14    | 8.982488976 |
| RAB7A        | NM_004637    | 94.44178218 | 7.918969955 | 4.76E-07    | 11.9260185  |
| KLHL25       | NM_022480    | 113.4264215 | 9.819450836 | 2.32E-08    | 11.55119807 |
| ZBTB10       | NM_023929    | 140.1934465 | 5.58816411  | 7.54E-13    | 25.08756789 |
| WDR78        | NM_207014    | 98.41321075 | 3.859593357 | 3.51E-09    | 25.49833665 |
| ITPRIPL2     | NM_001034841 | 118.2703536 | 19.51954993 | 1.03E-06    | 6.059071753 |
| STARD8       | NM_014725    | 79.5890429  | 4.29986041  | 1.48E-06    | 18.50968062 |
| KIAA1467     | NM_020853    | 115.3319    | 7.059959713 | 3.42E-09    | 16.3360564  |
| IKBKAP       | NM_003640    | 52.82201792 | 6.313577751 | 0.000745433 | 8.366416    |
| SLC25A25     | NM_001006641 | 62.67035361 | 12.21242099 | 0.000964991 | 5.131689584 |
| ZNF292       | NM_015021    | 135.3495144 | 4.117492723 | 7.59E-12    | 32.87182844 |
| PTTG1        | NM_001282383 | 210.6461858 | 9.791655429 | 5.39E-19    | 21.51282664 |
| PDK1         | NR_103729    | 85.6264215  | 3.622295418 | 2.87E-08    | 23.63871844 |
| OPA1         | NM_130834    | 220.8154644 | 2.85989543  | 2.87E-22    | 77.21102741 |
| MKRN2        | NM_001271707 | 229.4703536 | 9.556947478 | 3.61E-20    | 24.01084176 |
| CD55         | NR_125349    | 74.58463932 | 3.286573297 | 4.13E-07    | 22.69373982 |
| ACVR1B       | NM_020328    | 56.79344649 | 7.232785786 | 0.000843215 | 7.852222943 |
| GSTT2        | NM_000854    | 343.7692786 | 73.70556962 | 2.87E-14    | 4.664088215 |
| HBS1L        | NM_001145158 | 142.098925  | 3.571988329 | 6.14E-14    | 39.78146398 |
| C1orf53      | NM_001024594 | 169.0264215 | 23.05394633 | 7.12E-10    | 7.331778218 |
| ADK          | NM_001123    | 166.9604715 | 2.535070889 | 1.08E-15    | 65.8602772  |
| TXNRD2       | NM_006440    | 114.298925  | 8.000669503 | 5.65E-09    | 14.28617005 |
| RFESD        | NM_001131065 | 160.2110608 | 2.439398245 | 1.25E-18    | 65.67646802 |
| STYXL1       | NM_016086    | 206.6747572 | 12.18709767 | 5.13E-16    | 16.95848863 |
| SEMA6C       | NM_001178061 | 71.64618576 | 6.588059358 | 2.29E-05    | 10.8751579  |
| FADS2        | NM_001281502 | 82.68796794 | 10.86316636 | 2.06E-05    | 7.611774061 |
| GPATCH2      | NM_018040    | 234.4747572 | 3.212089113 | 7.45E-23    | 72.99758784 |
| CCNDBP1      | NR_045999    | 120.1758322 | 7.839305001 | 7.81E-10    | 15.32990898 |
| PNN          | NM_002687    | 144.1648751 | 13.98232713 | 4.94E-10    | 10.31050652 |
| PUS7         | NM_019042    | 224.46595   | 6.501945367 | 4.06E-20    | 34.52289082 |
| KIAA1715     | NM_030650    | 285.0703536 | 2.213115824 | 3.55E-31    | 128.8095049 |
| SLC25A27     | NM_004277    | 109.4549929 | 4.876623158 | 6.05E-10    | 22.44483311 |
| NOC3L        | NM_022451    | 155.0461858 | 3.61889654  | 2.47E-15    | 42.84349775 |
| EFTUD2       | NM_001258353 | 91.6638001  | 9.787078276 | 3.47E-06    | 9.3657982   |
| DNAJC9-AS1   | NR_038373    | 204.6088072 | 13.24301707 | 2.14E-16    | 15.45031666 |
| ZNF121       | NM_001008727 | 170.0593965 | 4.551621349 | 8.44E-17    | 37.36237781 |
| DDX19A       | NM_018332    | 173.1583215 | 8.925224946 | 1.38E-14    | 19.40100363 |
| URB1         | NM_014825    | 182.8461858 | 10.20182955 | 1.57E-14    | 17.92288185 |
| TIMM23B      | NM_001290117 | 130.1846393 | 4.917401942 | 2.97E-11    | 26.47427257 |
| NSMCE2       | NM_173685    | 174.9033286 | 6.696233908 | 2.42E-15    | 26.11965636 |
| ARMC9        | NM_001291656 | 126.3736822 | 6.099312685 | 8.31E-11    | 20.71933163 |
| NR6A1        | NM_001489    | 72.5186893  | 5.00881501  | 1.28E-05    | 14.47821274 |
| SUPT7L       | NM_001282730 | 323.7516643 | 12.52923155 | 3.71E-29    | 25.83970637 |
| NMRAL1       | NM_020677    | 91.6638001  | 20.98361731 | 0.000248164 | 4.368350736 |
| GATSL3       | NM_001037666 | 113.4264215 | 17.84240356 | 1.84E-06    | 6.357126782 |

|              |              |             |             |             |             |
|--------------|--------------|-------------|-------------|-------------|-------------|
| RPS24        | NM_001142284 | 154.1736822 | 21.60704401 | 3.96E-09    | 7.135343555 |
| SUZ12        | NM_015355    | 178.8747572 | 7.606338998 | 2.05E-15    | 23.51653762 |
| DHX36        | NM_001114397 | 68.7077322  | 3.687966918 | 2.14E-06    | 18.63024635 |
| CEP97        | NM_024548    | 112.3934465 | 3.665048464 | 4.51E-10    | 30.66629202 |
| CD274        | NM_001267706 | 98.57368223 | 4.254967027 | 2.63E-09    | 23.16673234 |
| RBM12        | NM_006047    | 213.5846393 | 10.22461902 | 1.42E-18    | 20.8892516  |
| HAUS1        | NM_138443    | 168.153918  | 5.006505415 | 8.39E-16    | 33.58708401 |
| C11orf30     | NM_001300943 | 88.56487506 | 3.553408565 | 2.84E-08    | 24.9239212  |
| ZNF507       | NM_001136156 | 95.63522867 | 6.873700711 | 3.18E-07    | 13.91320814 |
| NOL8         | NM_017948    | 227.7253465 | 8.264878421 | 2.54E-20    | 27.5533813  |
| CENPE        | NM_001286734 | 195.953918  | 3.051374958 | 7.05E-20    | 64.21823626 |
| MTFR2        | NM_001099286 | 114.4593965 | 3.891615083 | 4.14E-11    | 29.41179795 |
| IARS         | NM_013417    | 139.1604715 | 7.18764613  | 2.13E-11    | 19.36106327 |
| CDADC1       | NR_036439    | 149.0088072 | 3.412966525 | 3.79E-14    | 43.65961578 |
| DERL1        | NM_024295    | 144.3253465 | 9.488160969 | 1.60E-11    | 15.21109802 |
| CCDC121      | NM_001142683 | 87.69237152 | 14.32227122 | 6.18E-05    | 6.122797856 |
| WDYHV1       | NM_001283027 | 233.4417822 | 12.25258539 | 1.52E-19    | 19.05245095 |
| ABHD14A      | NM_015407    | 173.8703536 | 14.31828295 | 3.60E-13    | 12.14324051 |
| TRDMT1       | NM_004412    | 69.58023574 | 4.945184532 | 1.77E-05    | 14.07030118 |
| CREB1        | NM_134442    | 243.2901179 | 3.489570164 | 9.58E-24    | 69.71922226 |
| TRAPPC2L     | NM_016209    | 199.7648751 | 27.39185154 | 1.69E-11    | 7.292857686 |
| LOC100132352 | NR_034006    | 184.9121358 | 3.314314628 | 4.51E-20    | 55.79196803 |
| SESN2        | NM_031459    | 301.9890429 | 11.002516   | 2.80E-27    | 27.44727143 |
| PKMYT1       | NM_182687    | 144.1648751 | 33.95298005 | 5.61E-06    | 4.246015368 |
| MISP         | NM_173481    | 75.61761433 | 7.668675274 | 1.21E-05    | 9.860583691 |
| GPR160       | NM_014373    | 62.67035361 | 5.646634949 | 5.99E-05    | 11.0987082  |
| LOC101927221 | NR_125415    | 225.6593965 | 11.94531994 | 3.52E-19    | 18.89102993 |
| URM1         | NM_001135947 | 121.2088072 | 12.25877665 | 2.28E-08    | 9.887512484 |
| RAB30-AS1    | NR_038903    | 187.8505893 | 20.05661317 | 2.04E-11    | 9.366017472 |
| ESF1         | NM_016649    | 92.53630363 | 2.681928562 | 8.53E-09    | 34.50364224 |
| ATXN2L       | NM_145714    | 126.2132108 | 25.01374619 | 4.05E-06    | 5.045754035 |
| FZD6         | NM_001164616 | 128.2791608 | 6.716389487 | 9.85E-11    | 19.09942254 |
| CCDC148      | NM_138803    | 45.91213579 | 2.654054923 | 0.000553894 | 17.29886423 |
| AGGF1        | NM_018046    | 144.1648751 | 3.198091927 | 6.04E-14    | 45.07840249 |
| MTX1         | NM_198883    | 119.3033286 | 25.06822682 | 1.00E-05    | 4.759145091 |
| RBL2         | NM_005611    | 96.5077322  | 4.330935898 | 2.43E-08    | 22.28334348 |
| CAPZA1       | NM_006135    | 109.2945215 | 7.699410349 | 1.68E-08    | 14.19518073 |
| ATP6V0A1     | NM_001130020 | 164.0220179 | 9.999054046 | 9.77E-13    | 16.40375351 |
| CHRNB1       | NM_000747    | 65.76927864 | 10.88660616 | 0.000370765 | 6.041302284 |
| SFSWAP       | NM_004592    | 126.3736822 | 9.665372288 | 3.43E-09    | 13.07489029 |
| CTH          | NM_001190463 | 190.7890429 | 4.168446595 | 1.58E-19    | 45.76981822 |
| TCTEX1D2     | NM_152773    | 169.898925  | 7.597822461 | 5.00E-15    | 22.3615287  |
| VWA3B        | NM_144992    | 49.72309288 | 4.82129025  | 0.001440855 | 10.31323366 |
| TELO2        | NM_016111    | 142.098925  | 10.95612906 | 8.32E-11    | 12.96981117 |
| PLA2G4A      | NM_024420    | 45.75166431 | 2.95246687  | 0.000532636 | 15.49608051 |
| PRRT3-AS1    | NR_046734    | 95.47475719 | 13.63702427 | 7.33E-06    | 7.001143013 |
| LOC374443    | NR_002814    | 62.67035361 | 4.582630042 | 1.61E-05    | 13.67563016 |
| OAS3         | NM_006187    | 88.56487506 | 6.023995662 | 1.56E-07    | 14.70201508 |
| FIRRE        | NR_026975    | 51.7890429  | 2.106207987 | 0.000136596 | 24.58876009 |
| ARRDC3-AS1   | NR_027435    | 132.4110608 | 8.468034787 | 8.59E-11    | 15.63657497 |
| LEKR1        | NM_001004316 | 143.1319    | 2.515849739 | 1.08E-13    | 56.89207023 |
| LYPD6        | NM_001195685 | 167.9934465 | 4.431846166 | 4.14E-15    | 37.90597421 |
| MRPL38       | NM_032478    | 136.2220179 | 29.23869689 | 1.72E-06    | 4.658963374 |
| PTPLA        | NM_014241    | 163.1495144 | 2.533909781 | 3.13E-17    | 64.38647327 |
| MSL3         | NM_001193270 | 61.6373786  | 4.192734892 | 2.69E-05    | 14.70099593 |
| ZNF565       | NM_152477    | 111.520943  | 8.135170643 | 6.26E-09    | 13.70849461 |
| DENND5B-AS1  | NR_046909    | 71.64618576 | 3.528549274 | 4.16E-06    | 20.30471455 |
| LTBR         | NM_002342    | 118.2703536 | 16.38662377 | 2.27E-07    | 7.217493687 |
| ZBED3-AS1    | NR_024398    | 91.6638001  | 5.345302196 | 1.11E-07    | 17.14847856 |
| FAM222A-AS1  | NR_026661    | 61.79785007 | 8.549769634 | 0.000271158 | 7.228013469 |
| PTK6         | NM_001256358 | 89.4373786  | 20.86373877 | 0.000329802 | 4.286737845 |
| RPL12        | NM_000976    | 265.3736822 | 56.5747604  | 4.39E-11    | 4.690672667 |

|           |              |             |             |             |             |
|-----------|--------------|-------------|-------------|-------------|-------------|
| FLJ44313  | NM_001272093 | 84.59344649 | 17.84766096 | 0.000279464 | 4.739749746 |
| RAB35     | NM_006861    | 59.73190005 | 11.60099142 | 0.001443339 | 5.148861668 |
| SLC35D1   | NM_015139    | 248.4549929 | 4.485104643 | 1.68E-24    | 55.39558442 |
| ARPIN     | NM_182616    | 65.76927864 | 11.80961704 | 0.001287346 | 5.569128824 |
| HOXA11    | NM_005523    | 101.3516643 | 12.86291207 | 1.84E-06    | 7.87937162  |
| TRPV1     | NM_080705    | 48.69011787 | 9.097104629 | 0.004343163 | 5.352265348 |
| SFXN4     | NM_213649    | 186.8176143 | 11.30377786 | 9.53E-15    | 16.52700687 |
| PRDM4     | NM_012406    | 92.37583215 | 6.816539361 | 4.42E-07    | 13.55171991 |
| FAM173B   | NR_047668    | 232.4088072 | 8.811891048 | 8.58E-21    | 26.3744531  |
| PEX7      | NM_000288    | 138.1274965 | 3.736432535 | 2.49E-13    | 36.96774803 |
| MYO1B     | NM_012223    | 95.47475719 | 5.074701399 | 8.73E-08    | 18.813867   |
| PSMG1     | NM_001261824 | 198.7319    | 9.861097658 | 7.40E-18    | 20.15312158 |
| MRPL11    | NM_016050    | 119.3033286 | 12.3768306  | 3.17E-08    | 9.639247112 |
| POU2F1    | NR_037163    | 88.40440358 | 3.773282748 | 3.69E-08    | 23.42904295 |
| GTF2IRD2B | NM_001003795 | 101.3516643 | 9.241256814 | 1.27E-07    | 10.96730308 |
| HNRNPK    | NM_031262    | 194.7604715 | 16.6983763  | 8.45E-14    | 11.66343769 |
| PHAX      | NM_032177    | 127.2461858 | 5.270755847 | 4.76E-12    | 24.14192375 |
| LEMD2     | NM_181336    | 146.0703536 | 15.96005357 | 4.35E-10    | 9.152247077 |
| WNT10B    | NM_003394    | 97.54070721 | 12.61390544 | 2.78E-06    | 7.732792011 |
| TMEM87B   | NM_032824    | 150.0417822 | 4.742263133 | 8.12E-14    | 31.63927812 |
| KLHL8     | NM_001292007 | 223.432975  | 3.915201188 | 9.73E-22    | 57.06806989 |
| RPL27A    | NM_000990    | 290.0747572 | 55.41467229 | 8.49E-14    | 5.234620096 |
| INTS7     | NM_001199812 | 83.56047148 | 5.466740715 | 9.23E-07    | 15.28524505 |
| SUPT20H   | NM_001014286 | 206.6747572 | 3.657870947 | 2.75E-20    | 56.50138022 |
| STAT2     | NM_005419    | 103.4176143 | 14.07655705 | 3.34E-06    | 7.346797514 |
| TSC2      | NM_001114382 | 125.3407072 | 12.05225842 | 1.21E-08    | 10.39976931 |
| WRAP73    | NM_017818    | 146.0703536 | 11.65044964 | 6.20E-11    | 12.53774388 |
| RAB6A     | NM_002869    | 145.0373786 | 5.199545534 | 5.36E-13    | 27.89424146 |
| C5orf34   | NM_198566    | 72.67916077 | 3.966408803 | 5.24E-06    | 18.32366868 |
| C10orf131 | NM_001130446 | 125.3407072 | 2.324599453 | 1.24E-13    | 53.91927072 |
| FAM126B   | NM_173822    | 109.4549929 | 3.742639284 | 2.48E-10    | 29.24540268 |
| AIDA      | NM_022831    | 60.60440358 | 6.332861527 | 0.000113105 | 9.569829266 |
| STXBP5    | NM_139244    | 37.80880717 | 1.45270357  | 0.003266986 | 26.02651218 |
| WDR5B     | NM_019069    | 152.1077322 | 12.42641845 | 1.15E-11    | 12.24067359 |
| UCHL5     | NM_001199263 | 245.5165394 | 4.297313356 | 5.65E-25    | 57.1325661  |
| TRIM65    | NM_173547    | 260.3692786 | 27.20001543 | 3.98E-17    | 9.57239452  |
| CBLB      | NM_170662    | 118.2703536 | 1.349660746 | 2.53E-11    | 87.62969063 |
| CLTA      | NM_001184762 | 166.0879679 | 14.2927675  | 5.93E-12    | 11.62042046 |
| NUDT7     | NM_001243657 | 134.1560679 | 6.30441459  | 7.07E-12    | 21.27970265 |
| NDE1      | NM_001143979 | 212.7121358 | 10.92010362 | 3.35E-17    | 19.47894848 |
| POLR1E    | NM_022490    | 188.8835644 | 13.50531602 | 1.88E-14    | 13.98586779 |
| RABGEF1   | NM_014504    | 238.4461858 | 8.074013289 | 5.83E-21    | 29.53254809 |
| FAAH2     | NM_174912    | 44.87916077 | 1.393861591 | 0.000497065 | 32.19771681 |
| FTH1      | NM_002032    | 211.6090146 | 29.06821755 | 6.15E-12    | 7.27973823  |
| PRPSAP2   | NM_001243941 | 105.3230929 | 6.0013786   | 5.12E-09    | 17.54981645 |
| ANKRD26   | NM_014915    | 208.7407072 | 3.205429178 | 5.55E-21    | 65.12098557 |
| CA5BP1    | NR_026551    | 166.8       | 3.687514289 | 9.99E-17    | 45.23372302 |
| ZNF587    | NM_001204817 | 91.6638001  | 11.90138038 | 7.56E-06    | 7.701946932 |
| ANKH      | NM_054027    | 41.78023574 | 6.337747073 | 0.00449051  | 6.592285122 |
| ATP5A1    | NM_004046    | 212.7121358 | 9.425472313 | 1.07E-18    | 22.56779594 |
| ANP32E    | NM_001280559 | 92.53630363 | 6.551314593 | 2.52E-07    | 14.12484507 |
| DPY30     | NM_032574    | 144.0044036 | 5.078972244 | 1.72E-13    | 28.35305977 |
| CDK19     | NM_015076    | 69.58023574 | 4.366963226 | 2.27E-05    | 15.93332303 |
| MTCH1     | NM_014341    | 128.2791608 | 16.41374308 | 1.85E-08    | 7.81535084  |
| SIRT5     | NM_012241    | 205.8022537 | 11.10746233 | 4.00E-17    | 18.52828734 |
| CTNNAL1   | NM_003798    | 210.4857143 | 6.147412129 | 1.19E-18    | 34.2397272  |
| FAM171B   | NM_177454    | 195.7934465 | 4.528661215 | 1.46E-18    | 43.23428872 |
| HTR7      | NM_019860    | 49.72309288 | 3.945014148 | 0.000283486 | 12.60403411 |
| CCDC58    | NM_001017928 | 106.3560679 | 6.17539816  | 1.13E-08    | 17.22254422 |
| ZC3H13    | NM_015070    | 102.5451108 | 2.528210763 | 6.35E-10    | 40.56034896 |
| TMEM14C   | NM_016462    | 117.3978501 | 16.19198087 | 2.58E-07    | 7.250369858 |
| ZNF440    | NM_152357    | 110.6484394 | 5.246170287 | 2.28E-10    | 21.09127866 |

|              |              |             |             |             |             |
|--------------|--------------|-------------|-------------|-------------|-------------|
| SEMA7A       | NM_001146030 | 62.67035361 | 10.44938345 | 0.00084046  | 5.99751688  |
| ITSN1        | NM_001001132 | 114.298925  | 3.779037325 | 1.00E-10    | 30.24551366 |
| NOC2L        | NM_015658    | 96.5077322  | 14.39223182 | 9.15E-06    | 6.705543198 |
| PNISR        | NM_032870    | 125.3407072 | 3.543717326 | 3.19E-12    | 35.36983785 |
| ERCC4        | NM_005236    | 114.4593965 | 5.658919879 | 2.83E-10    | 20.2263681  |
| BLOC1S1      | NR_037657    | 102.3846393 | 15.70024845 | 9.51E-06    | 6.521211408 |
| CMAS         | NM_018686    | 202.7033286 | 5.825793947 | 6.05E-20    | 34.79411227 |
| CCDC142      | NM_032779    | 79.5890429  | 16.29983913 | 0.000225051 | 4.882811557 |
| IRAQ1BP1     | NM_001010844 | 109.2945215 | 3.652113808 | 5.96E-10    | 29.92637338 |
| PI4KB        | NM_001198773 | 62.67035361 | 14.36477445 | 0.002680043 | 4.362780203 |
| MRPL20       | NM_017971    | 166.0879679 | 33.84844152 | 1.17E-07    | 4.906812854 |
| CHAMP1       | NM_001164145 | 123.2747572 | 10.11009725 | 4.25E-09    | 12.19323159 |
| OGFOD3       | NR_033265    | 197.698925  | 9.757847647 | 1.01E-16    | 20.26050541 |
| SMARCA1      | NM_001282875 | 63.70332862 | 1.563816492 | 6.56E-06    | 40.73580816 |
| FGGY         | NM_018291    | 166.9604715 | 3.474395906 | 1.18E-15    | 48.05453265 |
| SLC6A6       | NR_103507    | 55.76047148 | 10.95198407 | 0.002922245 | 5.091357977 |
| COA7         | NM_023077    | 165.9274965 | 9.410577496 | 6.92E-14    | 17.63202062 |
| PHF3         | NM_001290259 | 148.1363036 | 4.343929167 | 1.98E-13    | 34.10191509 |
| LOC100996255 | NR_102756    | 180.7802357 | 2.192225999 | 7.84E-20    | 82.46423308 |
| METTL17      | NM_022734    | 90.47035361 | 15.53685639 | 4.72E-05    | 5.822951012 |
| EMC9         | NM_016049    | 345.6747572 | 41.45637327 | 2.98E-20    | 8.338277806 |
| VAMP7        | NR_033714    | 198.7319    | 4.256706165 | 4.46E-19    | 46.68677901 |
| SLC17A9      | NM_022082    | 63.70332862 | 4.595665075 | 2.72E-05    | 13.86161254 |
| SPAG9        | NM_001130527 | 59.89237152 | 8.842691479 | 0.000566242 | 6.773092974 |
| FAM212B      | NM_019099    | 271.4110608 | 21.53795844 | 7.37E-20    | 12.60152217 |
| ZNF599       | NM_001007248 | 74.7451108  | 6.256047847 | 1.13E-05    | 11.94765651 |
| KIAA1143     | NM_020696    | 129.3121358 | 6.78827901  | 7.44E-11    | 19.0493254  |
| TMEM161A     | NM_017814    | 161.0835644 | 7.228155891 | 9.25E-14    | 22.28556865 |
| TBC1D22A     | NM_001284303 | 113.26595   | 6.390198593 | 1.34E-09    | 17.72494992 |
| MRPL24       | NM_145729    | 138.1274965 | 25.296809   | 4.56E-07    | 5.460273527 |
| MTR          | NM_001291939 | 151.0747572 | 3.774759996 | 1.02E-14    | 40.02234774 |
| PITPNC1      | NM_181671    | 59.89237152 | 8.119817791 | 0.00058038  | 7.376073339 |
| SLC2A6       | NM_001145099 | 191.8220179 | 23.1408939  | 7.41E-12    | 8.289308908 |
| NUB1         | NM_001243351 | 123.2747572 | 6.865926054 | 4.29E-10    | 17.95457106 |
| ZNF280A      | NM_080740    | 46.78463932 | 5.141581155 | 0.003167666 | 9.09927081  |
| LINC01184    | NR_015360    | 199.9253465 | 4.544757148 | 5.17E-19    | 43.99032556 |
| DCTN4        | NM_016221    | 127.2461858 | 5.808000953 | 1.80E-11    | 21.90877495 |
| SLC43A1      | NM_003627    | 68.54726073 | 10.28553432 | 0.000297184 | 6.664433618 |
| COX15        | NM_004376    | 174.9033286 | 15.52096893 | 1.28E-12    | 11.26884084 |
| CDK9         | NM_001261    | 126.2132108 | 30.32801362 | 2.38E-05    | 4.161604922 |
| SLC4A7       | NM_001258379 | 49.72309288 | 2.870407616 | 0.000269114 | 17.3226592  |
| DHPS         | NM_001930    | 162.9890429 | 22.63508077 | 1.65E-09    | 7.200727251 |
| ASTE1        | NM_014065    | 157.9846393 | 7.071418403 | 4.48E-14    | 22.34129425 |
| RCBTB2       | NM_001286831 | 106.5165394 | 6.087412272 | 3.54E-09    | 17.49783563 |
| MXI1         | NM_130439    | 95.63522867 | 8.067369223 | 4.64E-07    | 11.8545744  |
| HNRNPLL      | NM_001142650 | 90.47035361 | 3.739441823 | 5.66E-08    | 24.19354489 |
| SLC19A2      | NM_006996    | 189.0440358 | 6.17345533  | 6.86E-18    | 30.62207884 |
| PLEKHH2      | NM_172069    | 107.5495144 | 2.477433883 | 2.24E-10    | 43.41165878 |
| KIAA0247     | NM_014734    | 107.2285714 | 8.969803951 | 2.46E-08    | 11.9543941  |
| NDUF4F4      | NM_014165    | 108.4220179 | 6.41399611  | 3.49E-09    | 16.90397313 |
| BACH1        | NM_001186    | 88.40440358 | 2.835886241 | 1.17E-08    | 31.1734661  |
| ZNF490       | NM_020714    | 127.2461858 | 4.263185084 | 5.58E-12    | 29.84768037 |
| C1orf21      | NM_030806    | 106.3560679 | 3.129437974 | 7.26E-10    | 33.98567691 |
| INTS6        | NM_001039938 | 226.3714286 | 33.53480889 | 2.31E-12    | 6.75034199  |
| CEP85        | NM_022778    | 294.0461858 | 9.438115278 | 3.78E-26    | 31.15518057 |
| TM2D1        | NM_032027    | 91.50332862 | 3.945488321 | 6.76E-08    | 23.19188936 |
| CDCA5        | NM_080668    | 132.2505893 | 21.37821741 | 4.53E-07    | 6.18623091  |
| POC1B        | NM_172240    | 64.73630363 | 5.4932778   | 3.90E-05    | 11.78464043 |
| SPATS2       | NM_001293286 | 202.7033286 | 5.694040058 | 2.55E-18    | 35.59921015 |
| MPHOSPH10    | NM_005791    | 107.5495144 | 10.76176132 | 5.10E-08    | 9.993672148 |
| DNMT1        | NM_001379    | 139.1604715 | 13.67936568 | 8.53E-10    | 10.17302079 |
| PRMT6        | NM_018137    | 81.65499293 | 11.67045874 | 3.35E-05    | 6.996725211 |



|              |              |             |             |             |             |
|--------------|--------------|-------------|-------------|-------------|-------------|
| RAD51C       | NM_002876    | 321.8461858 | 10.00527632 | 7.88E-31    | 32.16764591 |
| POLR2H       | NM_001278715 | 157.1121358 | 26.61915857 | 2.01E-08    | 5.902220215 |
| SNRNP35      | NM_022717    | 145.1978501 | 8.397455153 | 1.92E-12    | 17.2906967  |
| ELOVL6       | NM_001130721 | 75.61761433 | 5.170281856 | 6.53E-06    | 14.62543367 |
| ATP5J2-PTCD1 | NM_001198879 | 193.7274965 | 19.69061954 | 2.87E-13    | 9.838567857 |
| AMOTL1       | NM_001301007 | 69.74070721 | 5.455942503 | 2.13E-05    | 12.78252239 |
| LOC440700    | NR_036683    | 80.62201792 | 4.279232662 | 1.68E-07    | 18.84029785 |
| C11orf73     | NR_024597    | 111.3604715 | 3.951133733 | 5.30E-10    | 28.1844349  |
| CYBA         | NM_000101    | 290.0747572 | 30.77697255 | 8.10E-19    | 9.42505819  |
| C11orf52     | NM_080659    | 81.49452145 | 14.24479664 | 9.42E-05    | 5.721002799 |
| ZNF594       | NM_032530    | 179.7472607 | 16.40194524 | 4.45E-13    | 10.95889896 |
| EPM2AIP1     | NM_014805    | 145.1978501 | 15.66170692 | 1.12E-09    | 9.270882846 |
| DAB2         | NM_001244871 | 74.58463932 | 4.198698409 | 4.40E-06    | 17.76375249 |
| ZNF497       | NM_198458    | 172.9978501 | 19.67003348 | 1.73E-11    | 8.794995202 |
| SRCAP        | NM_006662    | 119.3033286 | 14.01798521 | 4.37E-08    | 8.51073295  |
| BACE2        | NM_138991    | 43.84618576 | 6.274652593 | 0.004420928 | 6.987826834 |
| SIVA1        | NM_006427    | 100.4791608 | 9.575269895 | 2.16E-07    | 10.49361134 |
| RPL3         | NM_001033853 | 284.1978501 | 46.18142245 | 7.48E-15    | 6.153943188 |
| FRMD8        | NM_001300833 | 200.6373786 | 9.429506368 | 3.54E-17    | 21.27761208 |
| TOP3A        | NM_004618    | 169.898925  | 9.905334598 | 1.57E-13    | 17.15226511 |
| TXN2         | NM_012473    | 242.4176143 | 13.02868937 | 1.55E-20    | 18.6064467  |
| B4GALT1-AS1  | NR_108110    | 104.4505893 | 9.543572002 | 4.72E-08    | 10.94460117 |
| RPL4         | NM_000968    | 264.5011787 | 21.0693252  | 2.07E-19    | 12.55385145 |
| MPZL3        | NM_001286152 | 134.1560679 | 5.656170843 | 1.05E-11    | 23.71853178 |
| FAF2         | NM_014613    | 116.3648751 | 6.503862153 | 3.55E-10    | 17.89165765 |
| NVL          | NM_001243147 | 143.1319    | 4.619323641 | 1.12E-12    | 30.98546696 |
| MBD5         | NM_018328    | 105.3230929 | 2.271083725 | 8.21E-10    | 46.37569797 |
| CGRRF1       | NM_006568    | 166.0879679 | 4.058827945 | 1.53E-16    | 40.92017947 |
| ARCN1        | NM_001655    | 169.898925  | 7.90892949  | 7.66E-15    | 21.48191171 |
| DSE          | NM_013352    | 149.1692786 | 3.974006652 | 1.29E-13    | 37.53624282 |
| ABCD3        | NM_001122674 | 140.1934465 | 3.724889257 | 7.67E-13    | 37.6369435  |
| AK6          | NM_016283    | 147.1033286 | 11.12732589 | 4.84E-11    | 13.22000722 |
| CEPT1        | NM_001007794 | 114.298925  | 5.433185065 | 4.28E-10    | 21.03718604 |
| ELOVL5       | NM_001242830 | 63.70332862 | 6.431108907 | 7.04E-05    | 9.905496788 |
| NAPA         | NM_003827    | 68.7077322  | 9.605257749 | 0.000281101 | 7.153137792 |
| RCBTB1       | NM_018191    | 196.66595   | 6.238390047 | 1.80E-17    | 31.52511282 |
| CISD1        | NM_018464    | 143.1319    | 3.950616379 | 1.72E-14    | 36.23027049 |
| TRIM13       | NM_001007278 | 208.5802357 | 10.69437026 | 2.32E-17    | 19.50374176 |
| MLX          | NM_198204    | 143.1319    | 32.94017269 | 4.02E-06    | 4.345207944 |
| KCTD18       | NM_152387    | 49.88356436 | 4.530345336 | 0.000913514 | 11.01098496 |
| SCN3B        | NM_001040151 | 61.6373786  | 6.789930578 | 0.000218162 | 9.077762709 |
| CACFD1       | NM_001242369 | 121.3692786 | 15.42917809 | 2.00E-07    | 7.866218013 |
| C20orf24     | NM_018840    | 78.71653937 | 13.88274898 | 0.000140841 | 5.670097433 |
| GOT1         | NM_002079    | 110.3274965 | 12.17594659 | 2.12E-07    | 9.0611022   |
| ZDHHC17      | NM_015336    | 235.3472607 | 1.660192744 | 2.39E-25    | 141.7589985 |
| STARD3       | NM_006804    | 215.8110608 | 14.12822928 | 9.44E-17    | 15.27516694 |
| FAM86HP      | NR_024252    | 103.4176143 | 10.82266566 | 5.12E-07    | 9.555650851 |
| FAM167A      | NM_053279    | 70.77368223 | 7.341873432 | 4.65E-05    | 9.639730633 |
| AASDHPPT     | NM_015423    | 207.5472607 | 4.08178312  | 2.21E-21    | 50.84720443 |
| CTSV         | NM_001333    | 156.0791608 | 14.46878513 | 3.14E-11    | 10.78730241 |
| H2AFY        | NM_138609    | 83.4        | 9.754695866 | 2.13E-05    | 8.549728371 |
| ETFA         | NM_001127716 | 192.8549929 | 5.141505099 | 1.45E-17    | 37.5094431  |
| PSAT1        | NM_058179    | 201.6703536 | 6.644721157 | 1.25E-18    | 30.35046149 |
| CTDSPL2      | NM_016396    | 123.2747572 | 5.264278495 | 1.17E-10    | 23.41721801 |
| SEMA4B       | NM_198925    | 151.9472607 | 12.50638955 | 3.53E-11    | 12.14957044 |
| ZNF112       | NM_001083335 | 103.4176143 | 3.550678475 | 2.00E-09    | 29.12615576 |
| KDF1         | NM_152365    | 110.4879679 | 18.21901133 | 1.49E-06    | 6.064432694 |
| FAM86A       | NM_201598    | 76.49011787 | 13.4156571  | 0.000138692 | 5.701555826 |
| SF3A3        | NM_006802    | 192.8549929 | 9.584878053 | 5.05E-16    | 20.12075603 |
| TXNDC9       | NM_005783    | 213.7451108 | 6.706886504 | 3.05E-20    | 31.86949871 |
| HHEX         | NM_002729    | 77.68356436 | 11.22495881 | 5.26E-05    | 6.92061019  |
| ZNF512       | NM_032434    | 151.2352287 | 5.772879774 | 4.86E-14    | 26.19753651 |

|          |              |             |             |             |             |
|----------|--------------|-------------|-------------|-------------|-------------|
| IGF2BP3  | NM_006547    | 90.47035361 | 5.342524018 | 1.60E-07    | 16.93400971 |
| RFC3     | NM_181558    | 108.4220179 | 5.352337964 | 3.58E-09    | 20.2569454  |
| DDX46    | NM_014829    | 115.4923715 | 8.389842663 | 6.07E-09    | 13.76573747 |
| CLTC     | NM_004859    | 182.8461858 | 10.86255054 | 1.57E-14    | 16.83271209 |
| ZNF843   | NM_001136509 | 82.52749646 | 9.098929271 | 4.04E-06    | 9.070022857 |
| FBXO17   | NM_024907    | 110.3274965 | 6.985123651 | 5.64E-09    | 15.79463757 |
| NACA     | NR_045277    | 136.2220179 | 15.32675344 | 6.42E-09    | 8.887858635 |
| ZNF695   | NR_037892    | 136.0615464 | 6.637712085 | 2.91E-11    | 20.49825975 |
| UFSP2    | NR_028085    | 128.2791608 | 5.089218102 | 4.44E-12    | 25.20606471 |
| CECR5    | NM_033070    | 86.65939651 | 9.886328631 | 7.60E-06    | 8.76557919  |
| C15orf41 | NM_001130010 | 87.53190005 | 2.589829897 | 3.42E-08    | 33.79832017 |
| CAPN5    | NM_004055    | 125.3407072 | 7.958310097 | 4.21E-10    | 15.74966365 |
| RNFT1    | NM_016125    | 235.6682037 | 9.640163876 | 9.58E-21    | 24.44649351 |
| FKRP     | NM_024301    | 65.60880717 | 9.64740714  | 0.000345775 | 6.800667393 |
| ENO1     | NM_001428    | 186.9780858 | 31.18964358 | 6.92E-10    | 5.994877284 |
| GSPT1    | NM_002094    | 180.9407072 | 6.501892032 | 8.94E-16    | 27.82893138 |
| ARHGEF3  | NM_001128615 | 121.3692786 | 6.394605741 | 3.78E-10    | 18.97994709 |
| RAB8A    | NM_005370    | 74.7451108  | 14.60984414 | 0.000306485 | 5.116078588 |
| MPST     | NM_021126    | 129.1516643 | 8.852493283 | 4.22E-10    | 14.5892982  |
| FAM133B  | NM_001288584 | 72.67916077 | 2.141131427 | 3.56E-07    | 33.94427818 |
| PSMA6    | NM_001282232 | 141.2264215 | 6.89173452  | 3.77E-12    | 20.49214477 |
| CD97     | NM_001025160 | 116.2044036 | 16.35007488 | 2.70E-07    | 7.107270422 |
| PPP2R3C  | NM_017917    | 118.4308251 | 8.215667956 | 1.96E-09    | 14.41523997 |
| ZCCHC3   | NM_033089    | 121.3692786 | 27.7339483  | 5.22E-05    | 4.376199065 |
| DYNC2H1  | NM_001080463 | 56.63297501 | 1.341850557 | 4.13E-06    | 42.20512837 |
| PTCD2    | NM_001284404 | 207.7077322 | 6.555747306 | 5.27E-19    | 31.6833036  |
| ACTR3    | NM_005721    | 101.3516643 | 3.146882133 | 1.25E-09    | 32.20700999 |
| CHMP2B   | NM_001244644 | 234.4747572 | 2.513205271 | 1.68E-26    | 93.29709749 |
| UFD1L    | NM_005659    | 77.68356436 | 9.270633214 | 5.11E-05    | 8.379531642 |
| NMT1     | NM_021079    | 156.9516643 | 11.0332584  | 2.83E-12    | 14.22532298 |
| NT5E     | NM_002526    | 113.4264215 | 11.30646987 | 3.02E-08    | 10.03199255 |
| FAM83D   | NM_030919    | 174.0308251 | 14.44838717 | 1.36E-12    | 12.04500011 |
| TIGD1    | NM_145702    | 261.2417822 | 17.27421638 | 1.03E-19    | 15.12322043 |
| C22orf24 | NM_015372    | 80.46154644 | 16.71934399 | 0.000643707 | 4.812482266 |
| NCKAP1   | NM_205842    | 61.6373786  | 2.813440201 | 1.05E-05    | 21.90818862 |
| ABCB8    | NM_001282293 | 126.3736822 | 19.25934378 | 1.51E-07    | 6.561681627 |
| FAM35A   | NM_019054    | 86.49892504 | 3.623308916 | 5.30E-08    | 23.87290928 |
| SLC36A1  | NM_078483    | 117.3978501 | 7.030234636 | 2.04E-09    | 16.69899458 |
| SSH3     | NM_017857    | 134.1560679 | 16.91894279 | 7.71E-09    | 7.929341067 |
| PTTG1IP  | NM_004339    | 98.41321075 | 12.2290977  | 3.30E-06    | 8.047462955 |
| SMIM7    | NM_001300925 | 181.8132108 | 15.3043493  | 1.61E-13    | 11.87983933 |
| STK4-AS1 | NR_038341    | 164.0220179 | 21.35523107 | 1.55E-09    | 7.680648238 |
| ZBTB1    | NM_014950    | 190.7890429 | 4.660125449 | 2.90E-19    | 40.94075256 |
| POLR2J2  | NM_032959    | 96.34726073 | 6.796936682 | 1.45E-07    | 14.17510052 |
| FXN      | NM_001161706 | 64.57583215 | 7.536015574 | 0.000164756 | 8.568962142 |
| BAIAP2   | NM_006340    | 273.1560679 | 18.27215121 | 2.86E-20    | 14.94931083 |
| MCM2     | NR_073375    | 151.2352287 | 13.1161682  | 2.99E-11    | 11.53044291 |
| ST3GAL1  | NM_003033    | 133.1230929 | 8.9577578   | 1.01E-10    | 14.861207   |
| USP16    | NM_001001992 | 98.41321075 | 6.66147168  | 1.23E-07    | 14.77349383 |
| RABGAP1  | NM_012197    | 221.5274965 | 5.015388216 | 2.51E-20    | 44.16956114 |
| TMBIM1   | NM_022152    | 111.520943  | 16.08957702 | 6.40E-07    | 6.931253868 |
| KIAA0196 | NM_014846    | 152.1077322 | 9.975134027 | 1.24E-11    | 15.24869057 |
| LONRF1   | NM_152271    | 60.60440358 | 6.682760808 | 0.000432508 | 9.068767434 |
| CS       | NM_004077    | 165.0549929 | 11.88851134 | 1.40E-12    | 13.88357114 |
| ZBTB43   | NM_014007    | 189.7560679 | 10.25986954 | 1.16E-15    | 18.49497862 |
| S100A16  | NM_080388    | 83.56047148 | 17.35661457 | 0.000244587 | 4.814330071 |
| UQCRC2   | NM_003366    | 88.56487506 | 7.170481416 | 9.21E-07    | 12.35131505 |
| WBP11    | NM_016312    | 52.82201792 | 4.165689264 | 0.000405328 | 12.68025879 |
| DARS     | NM_001293312 | 142.098925  | 4.486144679 | 8.05E-13    | 31.67506516 |
| RPL34    | NM_033625    | 97.54070721 | 17.2965011  | 2.30E-05    | 5.639331715 |
| PITRM1   | NM_001242307 | 255.2044036 | 12.72868887 | 4.64E-21    | 20.04954369 |
| NDNL2    | NM_138704    | 213.5846393 | 16.88033105 | 1.56E-14    | 12.6528703  |

|              |              |             |             |             |             |
|--------------|--------------|-------------|-------------|-------------|-------------|
| FBXO38       | NM_030793    | 141.2264215 | 5.316221471 | 1.32E-12    | 26.56518775 |
| NBPF3        | NM_001256417 | 193.7274965 | 8.263299233 | 4.42E-17    | 23.44432786 |
| ZNF674       | NM_001146291 | 92.53630363 | 2.359213844 | 4.45E-09    | 39.22336412 |
| NDUFA11      | NR_034166    | 87.53190005 | 12.22190167 | 8.74E-06    | 7.16188875  |
| GANAB        | NM_198335    | 96.5077322  | 13.59174016 | 3.30E-06    | 7.100469187 |
| RAB19        | NM_001008749 | 45.91213579 | 4.440550898 | 0.001733511 | 10.33928826 |
| PIGY         | NM_001042616 | 281.2593965 | 18.62316196 | 3.18E-21    | 15.10266608 |
| RNF6         | NM_183044    | 130.1846393 | 3.64220685  | 8.10E-14    | 35.74334042 |
| POLR3GL      | NM_032305    | 220.6549929 | 6.721177035 | 1.58E-21    | 32.82981415 |
| DDX11        | NM_152438    | 165.2154644 | 10.88537734 | 2.22E-13    | 15.17774343 |
| C19orf47     | NM_001256441 | 130.1846393 | 7.840477379 | 4.52E-11    | 16.60417256 |
| PET117       | NM_001164811 | 227.7253465 | 16.26144829 | 2.03E-17    | 14.00400152 |
| RMDN3        | NM_018145    | 88.56487506 | 10.7841127  | 4.05E-06    | 8.212532412 |
| EEF2         | NM_001961    | 280.5473645 | 30.5229039  | 6.34E-18    | 9.191372006 |
| FRAT2        | NM_012083    | 154.0132108 | 5.91593692  | 2.54E-14    | 26.03361274 |
| IL17RE       | NM_001193380 | 84.59344649 | 8.539351314 | 4.38E-06    | 9.906308264 |
| NUDT4P2      | NR_104005    | 178.0022537 | 9.287623838 | 6.24E-15    | 19.16553219 |
| RBAK         | NM_021163    | 159.0176143 | 5.359150409 | 9.54E-15    | 29.67216857 |
| PSMC3        | NM_002804    | 152.1077322 | 19.50041589 | 2.16E-09    | 7.800230164 |
| POGLUT1      | NR_024265    | 141.06595   | 5.220163334 | 2.30E-13    | 27.0232828  |
| PUS10        | NM_144709    | 42.97368223 | 6.264866376 | 0.004313593 | 6.859473075 |
| SEMA4F       | NR_073399    | 148.2967751 | 9.015844308 | 7.77E-12    | 16.44846229 |
| LINC01481    | NR_120460    | 122.2417822 | 3.854726494 | 5.01E-12    | 31.71218046 |
| MPZL1        | NM_024569    | 185.7846393 | 4.169063834 | 1.89E-17    | 44.56267563 |
| FAM214B      | NM_025182    | 67.51428571 | 14.45030767 | 0.001875113 | 4.672169427 |
| C1orf123     | NM_017887    | 211.6791608 | 19.18502499 | 3.31E-15    | 11.0335619  |
| AHNAK        | NM_001620    | 109.4549929 | 11.13815409 | 7.89E-08    | 9.827031665 |
| LOC100506747 | NR_036557    | 156.2396323 | 5.697656594 | 1.59E-14    | 27.42173553 |
| MAP4         | NM_001134364 | 180.9407072 | 5.81212448  | 5.91E-16    | 31.13159531 |
| PNPLA3       | NM_025225    | 216.6835644 | 9.247350402 | 3.34E-19    | 23.43196212 |
| VBP1         | NM_003372    | 76.65058935 | 2.660733017 | 7.34E-08    | 28.80807238 |
| C22orf29     | NM_024627    | 278.1604715 | 26.23520012 | 1.01E-18    | 10.60256717 |
| PRKAR2A-AS1  | NR_109996    | 87.69237152 | 12.63637589 | 2.62E-05    | 6.939677345 |
| UBIAD1       | NM_013319    | 208.5802357 | 10.03397334 | 4.35E-18    | 20.78740183 |
| C14orf119    | NM_017924    | 181.8132108 | 14.69790561 | 6.50E-14    | 12.37000805 |
| AP2A2        | NM_012305    | 123.2747572 | 8.575259296 | 1.04E-09    | 14.37563028 |
| BORA         | NM_001286747 | 53.85499293 | 5.639437449 | 0.000324119 | 9.549710128 |
| PSMD5-AS1    | NR_024408    | 166.9604715 | 15.87899448 | 8.72E-12    | 10.51454937 |
| BRK1         | NM_018462    | 125.3407072 | 9.028661874 | 2.41E-10    | 13.8825342  |
| NR3C2        | NM_001166104 | 69.58023574 | 1.897318527 | 3.41E-06    | 36.67293328 |
| IFNAR2       | NM_000874    | 157.9846393 | 8.375979675 | 1.56E-13    | 18.86163117 |
| AAR2         | NM_001271874 | 221.5274965 | 8.583478409 | 2.96E-20    | 25.8085925  |
| RNF169       | NM_001098638 | 100.4791608 | 4.998132781 | 1.93E-08    | 20.10333962 |
| LOC101928414 | NR_120335    | 155.0461858 | 5.861304177 | 8.95E-14    | 26.45250632 |
| EIF2B4       | NM_172195    | 81.65499293 | 18.99875932 | 0.000626988 | 4.297911856 |
| COP5         | NM_006837    | 143.2923715 | 10.62794723 | 9.88E-11    | 13.48260096 |
| OXR1         | NM_181354    | 140.1934465 | 3.179343916 | 1.04E-13    | 44.09508698 |
| CCDC94       | NM_018074    | 93.56927864 | 5.971101023 | 1.48E-07    | 15.67035598 |
| SF3B4        | NM_005850    | 189.7560679 | 23.05156775 | 7.93E-12    | 8.231807484 |
| TSTD3        | NM_001195131 | 269.1846393 | 10.47687257 | 1.40E-24    | 25.69322454 |
| QPCTL        | NM_017659    | 101.5121358 | 15.90493124 | 2.42E-06    | 6.382431604 |
| DNAJC18      | NM_152686    | 75.45714286 | 7.206107101 | 2.10E-05    | 10.4712769  |
| C20orf27     | NM_001258429 | 113.4264215 | 10.78569039 | 4.19E-08    | 10.51638026 |
| LYRM7        | NR_121658    | 98.41321075 | 3.915475492 | 1.23E-08    | 25.13442134 |
| DTWD2        | NM_173666    | 161.0835644 | 2.128848486 | 9.02E-16    | 75.66699341 |
| METT18       | NM_033418    | 132.2505893 | 15.76944409 | 2.53E-08    | 8.386509289 |
| HNRNPH2      | NM_019597    | 58.69892504 | 5.627114753 | 9.70E-05    | 10.43144269 |
| NAA20        | NM_181528    | 119.3033286 | 9.319425814 | 2.26E-09    | 12.80157501 |
| LDHA         | NM_001165414 | 148.1363036 | 9.158444733 | 5.09E-12    | 16.17483186 |
| TMEM33       | NM_018126    | 151.0747572 | 4.605708907 | 7.57E-15    | 32.80162951 |
| LOC101929057 | NR_111915    | 171.8044036 | 7.53048552  | 9.90E-15    | 22.81451882 |
| PFN4         | NM_199346    | 121.2088072 | 10.60321764 | 3.00E-09    | 11.43132314 |

|                |              |             |             |             |             |
|----------------|--------------|-------------|-------------|-------------|-------------|
| STRA13         | NM_001271007 | 182.8461858 | 34.9275913  | 5.69E-09    | 5.235007023 |
| OSBPL10        | NM_017784    | 95.31428571 | 5.490629116 | 9.79E-08    | 17.35944711 |
| PDCD2L         | NM_032346    | 151.9472607 | 7.734690298 | 1.49E-12    | 19.6449056  |
| RPS7           | NM_001011    | 113.4264215 | 22.4086882  | 1.16E-05    | 5.061716263 |
| CASD1          | NM_022900    | 42.81321075 | 2.016340008 | 0.000705714 | 21.23313062 |
| XRCC6          | NM_001288978 | 99.44618576 | 12.36527535 | 2.46E-06    | 8.042375356 |
| ZCCHC6         | NM_001185074 | 111.3604715 | 5.116682217 | 1.16E-09    | 21.76419538 |
| NOP10          | NM_018648    | 166.9604715 | 11.43773041 | 2.05E-11    | 14.59734278 |
| PLS3-AS1       | NR_110384    | 64.57583215 | 3.582034203 | 3.95E-06    | 18.02769837 |
| GLB1           | NM_000404    | 138.1274965 | 7.103087221 | 4.51E-11    | 19.44612141 |
| ZC3H10         | NM_032786    | 165.9274965 | 34.25906003 | 1.74E-07    | 4.843317252 |
| LOXL1          | NM_005576    | 124.3077322 | 11.29208772 | 7.65E-09    | 11.00839236 |
| COPZ1          | NM_016057    | 115.4923715 | 9.71264853  | 1.77E-08    | 11.89092462 |
| TRAPPC2        | NM_001011658 | 81.49452145 | 4.905533898 | 3.13E-07    | 16.61277307 |
| SLC26A2        | NM_000112    | 179.7472607 | 5.962640535 | 1.23E-16    | 30.14558058 |
| EXOC8          | NM_175876    | 160.9230929 | 7.81503288  | 9.08E-15    | 20.59147995 |
| SEC14L5        | NM_014692    | 45.91213579 | 5.686458126 | 0.002341937 | 8.073942474 |
| CIAPIN1        | NM_020313    | 202.8638001 | 9.518446345 | 4.08E-17    | 21.31270091 |
| FBXO7          | NM_001033024 | 80.78248939 | 5.085390054 | 6.99E-07    | 15.88521009 |
| PNO1           | NM_020143    | 70.61321075 | 9.543917358 | 0.0001319   | 7.398765947 |
| SURF6          | NM_006753    | 164.8945215 | 10.20520519 | 7.32E-14    | 16.15788399 |
| MFSD2A         | NM_001287808 | 181.9736822 | 10.37429339 | 3.00E-15    | 17.54082668 |
| FBXO8          | NM_012180    | 65.92975012 | 2.937856486 | 3.62E-06    | 22.44144683 |
| TBC1D19        | NM_018317    | 221.5274965 | 2.364762046 | 3.71E-22    | 93.67855716 |
| C8orf33        | NM_023080    | 156.9516643 | 14.17263373 | 3.72E-11    | 11.07427648 |
| ATP6V0C        | NM_001694    | 147.9758322 | 14.93287239 | 2.95E-10    | 9.909401775 |
| NLRX1          | NM_024618    | 221.6879679 | 11.60248114 | 1.62E-18    | 19.1069449  |
| FARSB          | NM_005687    | 112.553918  | 4.693387389 | 1.31E-09    | 23.98138245 |
| SLC25A14       | NM_001282196 | 132.0901179 | 2.650594707 | 5.16E-14    | 49.83414383 |
| FADS3          | NM_021727    | 67.67475719 | 8.613840902 | 6.08E-05    | 7.856513484 |
| ERAL1          | NM_005702    | 123.1142857 | 10.44943997 | 2.80E-09    | 11.78190277 |
| ALMS1          | NM_015120    | 68.7077322  | 3.385971209 | 3.46E-06    | 20.29188317 |
| PIGC           | NM_002642    | 112.3934465 | 11.38188765 | 2.18E-07    | 9.8747633   |
| TIMM10         | NM_012456    | 56.79344649 | 8.734817821 | 0.002652592 | 6.501961192 |
| ZNF25          | NM_145011    | 226.5319    | 3.92693171  | 4.80E-24    | 57.68674292 |
| C16orf72       | NM_014117    | 144.1648751 | 11.9428123  | 2.15E-10    | 12.07126692 |
| PLEKHA8        | NM_001197027 | 187.8505893 | 3.393515929 | 7.31E-19    | 55.35574115 |
| PNLDC1         | NM_001271862 | 41.94070721 | 5.647346432 | 0.003399758 | 7.426621993 |
| HMBOX1         | NM_024567    | 36.77583215 | 2.910241787 | 0.003430841 | 12.63669305 |
| HELZ           | NM_014877    | 126.2132108 | 5.782258142 | 8.74E-11    | 21.82766795 |
| GAN            | NM_022041    | 215.8110608 | 7.371485662 | 3.94E-19    | 29.27646756 |
| CCDC186        | NM_018017    | 149.1692786 | 6.21893505  | 1.58E-12    | 23.98630593 |
| NUP62          | NM_001193357 | 226.5319    | 13.13732612 | 6.36E-18    | 17.24337951 |
| CTR9           | NM_014633    | 219.7824894 | 6.380447627 | 7.60E-21    | 34.44624927 |
| SLTM           | NM_024755    | 284.0373786 | 5.066089614 | 4.95E-28    | 56.06639445 |
| CCDC132        | NM_001257998 | 90.47035361 | 2.067595014 | 1.15E-08    | 43.75632219 |
| MTRF1          | NM_004294    | 64.73630363 | 3.835096027 | 2.72E-05    | 16.87996941 |
| GAS2L1         | NM_152236    | 73.55166431 | 16.61180416 | 0.001152038 | 4.427674658 |
| RPL36A-HNRNPH2 | NM_001199974 | 109.2945215 | 14.86142094 | 1.28E-06    | 7.354244382 |
| RNF2           | NM_007212    | 109.2945215 | 5.250073228 | 2.01E-09    | 20.81771372 |
| UBXN7          | NM_015562    | 151.0747572 | 5.460037381 | 1.35E-13    | 27.66918001 |
| TAOK2          | NM_001252043 | 175.9363036 | 16.10067212 | 1.27E-12    | 10.92726455 |
| RAET1G         | NM_001001788 | 90.47035361 | 11.3858276  | 7.92E-06    | 7.945874185 |
| EPDR1          | NM_001242948 | 61.6373786  | 1.707653194 | 2.82E-06    | 36.09478717 |
| MIR181A1HG     | NR_040073    | 102.3846393 | 2.211822577 | 7.92E-10    | 46.28971618 |
| TROVE2         | NM_004600    | 201.8308251 | 7.817807232 | 8.41E-18    | 25.81680759 |
| CLCN4          | NM_001256944 | 37.80880717 | 2.067548867 | 0.003043463 | 18.28677801 |
| SCAMP2         | NM_005697    | 237.4132108 | 10.27602417 | 6.09E-20    | 23.10360571 |
| HCN3           | NM_020897    | 109.2945215 | 10.57722666 | 1.19E-07    | 10.33300363 |
| SLMO1          | NM_001142405 | 142.098925  | 9.260655649 | 2.17E-11    | 15.34436982 |
| HNRNPR         | NM_001297622 | 90.47035361 | 7.085462757 | 5.87E-07    | 12.76844671 |
| EARS2          | NR_003501    | 120.3363036 | 9.060379699 | 6.14E-09    | 13.28159609 |

|                 |              |             |             |             |             |
|-----------------|--------------|-------------|-------------|-------------|-------------|
| LOC646903       | NR_036538    | 130.1846393 | 16.16588773 | 1.10E-07    | 8.053046114 |
| CSNK2A1         | NM_177560    | 141.06595   | 7.045249085 | 1.59E-11    | 20.02284778 |
| LOC100507530    | NR_125386    | 232.5692786 | 8.201855802 | 3.65E-20    | 28.35568977 |
| RPRD1B          | NM_021215    | 144.3253465 | 6.903904382 | 4.07E-12    | 20.90488781 |
| DMAP1           | NM_001034024 | 148.1363036 | 20.78947792 | 4.04E-09    | 7.125542266 |
| ZNF235          | NM_004234    | 135.1890429 | 2.818097525 | 3.63E-14    | 47.9717404  |
| CFAP57          | NM_152498    | 81.49452145 | 4.098002752 | 4.69E-07    | 19.88639988 |
| CDC20           | NM_001255    | 237.4132108 | 33.795515   | 3.91E-13    | 7.024991653 |
| CTC1            | NR_046431    | 138.1274965 | 14.07356903 | 3.29E-09    | 9.814674313 |
| TMEM199         | NM_152464    | 160.0505893 | 7.734727325 | 2.15E-14    | 20.69246692 |
| SMC5-AS1        | NR_039990    | 155.0461858 | 4.699489484 | 1.73E-14    | 32.99213378 |
| UBP1            | NM_001128161 | 112.232975  | 7.47558554  | 8.71E-09    | 15.01326878 |
| PJA2            | NM_014819    | 72.83963225 | 2.546627194 | 1.12E-06    | 28.60239316 |
| PSKH1           | NM_006742    | 83.56047148 | 12.30033597 | 6.68E-05    | 6.793348706 |
| DIS3            | NM_014953    | 69.74070721 | 6.987400273 | 6.73E-05    | 9.980923447 |
| SLC29A3         | NR_033414    | 148.1363036 | 9.695888407 | 1.51E-11    | 15.27825996 |
| CCT4            | NM_006430    | 211.6791608 | 11.06001615 | 1.13E-17    | 19.13913667 |
| CCDC79          | NM_001136505 | 42.81321075 | 3.570549896 | 0.000843839 | 11.99064906 |
| ASPM            | NM_001206846 | 88.56487506 | 3.094534232 | 1.77E-08    | 28.61977552 |
| PPIL2           | NM_014337    | 194.7604715 | 11.30304781 | 2.42E-15    | 17.23079251 |
| GBA             | NM_001171811 | 99.44618576 | 19.76229107 | 4.34E-05    | 5.03211826  |
| RP2             | NM_006915    | 130.1846393 | 2.292097558 | 8.57E-14    | 56.79716331 |
| NLE1            | NM_001014445 | 101.3516643 | 10.07161427 | 6.42E-07    | 10.06310027 |
| ZMYM5           | NM_001142684 | 212.5516643 | 6.132468268 | 2.29E-19    | 34.66005122 |
| ZNF30           | NM_001099437 | 62.67035361 | 5.003304555 | 3.33E-05    | 12.52579229 |
| SLC7A6          | NM_003983    | 133.2835644 | 12.80111059 | 1.96E-09    | 10.41187508 |
| SYTL4           | NM_080737    | 37.80880717 | 2.872715218 | 0.003033721 | 13.16134886 |
| TMEM41B         | NM_001165030 | 74.58463932 | 6.057723584 | 1.41E-05    | 12.31232134 |
| SPECC1L-ADORA2A | NR_103546    | 227.4044036 | 7.252964016 | 1.30E-19    | 31.35330647 |
| LOC100506804    | NR_040081    | 161.0835644 | 8.239366639 | 7.46E-14    | 19.55047899 |
| SCD5            | NM_024906    | 80.62201792 | 5.623942185 | 1.90E-06    | 14.33549906 |
| CBWD6           | NM_001085457 | 45.91213579 | 1.376936205 | 0.000331108 | 33.34369133 |
| MRPL32          | NM_031903    | 134.3165394 | 3.408455403 | 1.14E-14    | 39.40686425 |
| CBR3            | NM_001236    | 84.59344649 | 12.74630316 | 2.09E-05    | 6.636704417 |
| PLEKHO2         | NM_001195059 | 208.7407072 | 15.11156775 | 6.98E-16    | 13.81330585 |
| PAXBPI-AS1      | NR_038879    | 212.7121358 | 12.69369693 | 3.66E-17    | 16.7573038  |
| OAT             | NM_000274    | 216.6835644 | 12.66613702 | 3.61E-17    | 17.10731251 |
| RC3H2           | NM_018835    | 181.8132108 | 5.978098712 | 4.42E-16    | 30.41321656 |
| ZNF575          | NM_174945    | 133.1230929 | 30.15714264 | 1.04E-05    | 4.414313864 |
| MKL1            | NM_001282662 | 244.3230929 | 5.993978253 | 2.80E-22    | 40.76142464 |
| STK17B          | NM_004226    | 204.6088072 | 1.724775709 | 3.14E-24    | 118.6292259 |
| ATG13           | NM_001205119 | 54.72749646 | 7.817645557 | 0.0015517   | 7.000508794 |
| EMP2            | NM_001424    | 142.2593965 | 8.179031853 | 8.27E-12    | 17.39318284 |
| MAD2L1BP        | NM_001003690 | 88.56487506 | 22.02874724 | 0.000389199 | 4.020422681 |
| UBAC2           | NM_001144072 | 237.5736822 | 6.107306046 | 1.52E-21    | 38.89991437 |
| ABCC4           | NM_005845    | 59.73190005 | 4.408922722 | 0.000140893 | 13.54795804 |
| TTC1            | NM_001282500 | 144.1648751 | 6.715309047 | 7.21E-12    | 21.46809239 |
| OTUD6B          | NM_016023    | 79.5890429  | 7.007312461 | 3.76E-06    | 11.35799828 |
| SEC22C          | NM_032970    | 156.0791608 | 5.782147719 | 7.44E-14    | 26.99328491 |
| THAP9-AS1       | NR_034077    | 114.4593965 | 21.1306786  | 5.80E-06    | 5.416740212 |
| H3F3A           | NM_002107    | 139         | 8.775847602 | 1.65E-11    | 15.83892591 |
| TMEM141         | NM_032928    | 164.0220179 | 26.4875828  | 2.34E-08    | 6.19241171  |
| TMEM41A         | NM_080652    | 229.7912966 | 13.42511214 | 3.77E-19    | 17.11652716 |
| DAD1            | NM_001344    | 83.56047148 | 5.766061579 | 4.17E-07    | 14.49177577 |
| ANXA5           | NM_001154    | 247.4220179 | 5.915987365 | 3.00E-24    | 41.82260756 |
| MID2            | NM_012216    | 88.40440358 | 2.139980481 | 2.02E-08    | 41.31084576 |
| C18orf32        | NM_001035005 | 219.6220179 | 8.778894971 | 7.71E-21    | 25.01704584 |
| CGN             | NM_020770    | 97.38023574 | 6.571783615 | 1.11E-07    | 14.81793094 |
| PPP5C           | NM_006247    | 180.9407072 | 10.15600767 | 1.36E-14    | 17.8161255  |
| DRAM1           | NM_018370    | 171.0923715 | 5.031337063 | 3.52E-16    | 34.00534875 |
| LOC728730       | NR_037875    | 244.4835644 | 4.285078933 | 1.02E-22    | 57.0546233  |
| ZNF224          | NM_013398    | 127.2461858 | 5.668141057 | 8.25E-12    | 22.44936823 |

|              |              |             |             |             |             |
|--------------|--------------|-------------|-------------|-------------|-------------|
| NDUFS7       | NM_024407    | 162.9890429 | 18.51721684 | 1.09E-10    | 8.802027016 |
| TNIP2        | NM_001292016 | 65.60880717 | 10.22425097 | 0.000390941 | 6.416979333 |
| CASP3        | NM_032991    | 116.2044036 | 3.153686531 | 1.46E-11    | 36.84716361 |
| ZNF576       | NM_024327    | 79.74951438 | 19.60237416 | 0.001804005 | 4.068359972 |
| UBXN2A       | NM_181713    | 80.62201792 | 5.41122705  | 1.46E-06    | 14.899027   |
| LYPLAL1-AS1  | NR_038845    | 41.94070721 | 1.617764968 | 0.000823942 | 25.92509298 |
| ISOC1        | NM_016048    | 252.4264215 | 5.399723063 | 3.73E-26    | 46.74803107 |
| SGK3         | NM_001033578 | 91.50332862 | 6.325666583 | 1.64E-07    | 14.46540494 |
| INTS5        | NM_030628    | 293.3341537 | 24.36880571 | 6.89E-21    | 12.03728066 |
| TMEM53       | NM_024587    | 68.7077322  | 7.952028863 | 6.39E-05    | 8.640277015 |
| ZNF398       | NM_170686    | 77.52309288 | 5.692948744 | 2.15E-06    | 13.61738817 |
| HSF2BP       | NM_007031    | 139.1604715 | 4.074661177 | 2.40E-12    | 34.15264863 |
| PGPEP1       | NM_017712    | 114.298925  | 13.91851859 | 1.17E-07    | 8.212003616 |
| SNX3         | NM_152827    | 148.1363036 | 6.327829334 | 1.52E-12    | 23.41028745 |
| CBWD3        | NM_201453    | 70.77368223 | 0.517011691 | 5.84E-09    | 136.8899069 |
| MAGEB2       | NM_002364    | 66.64178218 | 7.977583341 | 9.77E-05    | 8.353630332 |
| HSP90AA1     | NM_001017963 | 189.7560679 | 14.04113161 | 2.89E-14    | 13.51430021 |
| STAU2        | NM_014393    | 137.0945215 | 4.041655752 | 5.44E-13    | 33.92038557 |
| FOXA3        | NM_004497    | 72.5186893  | 12.83769965 | 0.000337876 | 5.648885023 |
| ZCCHC11      | NM_015269    | 158.8571429 | 4.293766807 | 2.50E-14    | 36.99715192 |
| MTERF1       | NM_001301135 | 118.5912966 | 7.932285261 | 1.26E-09    | 14.95045786 |
| UBE2G1       | NM_003342    | 175.7758322 | 5.243827189 | 4.33E-16    | 33.52052343 |
| CREG2        | NM_153836    | 46.9451108  | 5.756361922 | 0.002194855 | 8.15534385  |
| ZNF175       | NM_007147    | 43.68571429 | 3.895911662 | 0.002848303 | 11.21321993 |
| MIPEPP3      | NR_038939    | 176.9692786 | 8.683769216 | 1.20E-14    | 20.3793162  |
| HPRT1        | NM_000194    | 81.49452145 | 2.897933788 | 4.28E-08    | 28.12159539 |
| RHOG         | NM_001665    | 108.2615464 | 15.1727143  | 8.58E-07    | 7.135278783 |
| TGFA         | NM_003236    | 164.8945215 | 7.29133125  | 8.58E-14    | 22.61514609 |
| TCP11L2      | NM_152772    | 50.75606789 | 5.756117911 | 0.00068367  | 8.817760281 |
| ZNF343       | NM_001282496 | 113.26595   | 7.568972768 | 2.43E-09    | 14.96450753 |
| DCAF17       | NR_028482    | 159.1780858 | 3.219506486 | 2.38E-15    | 49.44176584 |
| ZC3H4        | NM_015168    | 142.2593965 | 11.73991749 | 7.03E-11    | 12.11758061 |
| LOC100270804 | NR_026885    | 84.75391796 | 14.11200543 | 0.000106532 | 6.005802533 |
| CCNT2        | NR_037649    | 124.3077322 | 3.11217594  | 6.95E-13    | 39.94238585 |
| UBE3A        | NM_000462    | 137.0945215 | 3.591185216 | 2.72E-13    | 38.17528565 |
| C19orf52     | NM_138358    | 166.9604715 | 19.10237945 | 1.35E-09    | 8.740297088 |
| TTC28-AS1    | NR_026963    | 89.59785007 | 6.00912723  | 2.56E-07    | 14.9102934  |
| RSL24D1      | NM_016304    | 99.44618576 | 4.189408636 | 1.46E-09    | 23.73752346 |
| ZBED5        | NM_001143667 | 181.8132108 | 10.22978279 | 4.98E-16    | 17.77292973 |
| RASA1        | NM_002890    | 76.65058935 | 3.638649828 | 4.34E-07    | 21.06566803 |
| SEC24D       | NM_014822    | 180.7802357 | 4.841953172 | 2.48E-16    | 37.33622142 |
| USP18        | NM_017414    | 149.1692786 | 6.670548305 | 5.20E-13    | 22.3623714  |
| GIN1         | NM_017676    | 133.2835644 | 2.651618262 | 2.50E-14    | 50.26498959 |
| RNGTT        | NM_001286426 | 148.1363036 | 3.162317676 | 4.72E-14    | 46.84421959 |
| SMARCAL1     | NM_001127207 | 41.78023574 | 5.037333979 | 0.004194438 | 8.294116672 |
| WHAMMP3      | NR_003521    | 36.77583215 | 1.372932261 | 0.001431047 | 26.78634132 |
| WDR13        | NM_017883    | 62.67035361 | 11.16290397 | 0.001466556 | 5.614162209 |
| LOC101926941 | NR_120664    | 118.2703536 | 10.81533323 | 2.42E-08    | 10.93543315 |
| CCDC124      | NM_001136203 | 195.7934465 | 13.38313337 | 2.37E-15    | 14.6298659  |
| RANBP2       | NM_006267    | 203.8967751 | 3.336754971 | 1.17E-19    | 61.10630745 |
| POLM         | NM_001284330 | 185.7846393 | 19.31832782 | 2.34E-12    | 9.617014527 |
| C17orf70     | NR_033338    | 159.1780858 | 25.35243921 | 5.00E-09    | 6.278610293 |
| EIF5B        | NM_015904    | 195.953918  | 5.78662228  | 2.08E-18    | 33.863264   |
| C4orf32      | NM_152400    | 149.0088072 | 2.205552199 | 5.94E-16    | 67.56077107 |
| KLHL9        | NM_018847    | 183.8791608 | 4.647414608 | 3.95E-19    | 39.56590412 |
| RBM26        | NM_001286631 | 98.41321075 | 3.222656173 | 3.08E-09    | 30.53791825 |
| MYC          | NM_002467    | 259.3363036 | 47.68264248 | 2.74E-12    | 5.438798903 |
| NOL10        | NM_001261394 | 145.0373786 | 6.112970663 | 8.39E-13    | 23.72616958 |
| C5orf63      | NM_001164479 | 81.49452145 | 3.570493731 | 3.17E-07    | 22.82444042 |
| KATNAL1      | NM_032116    | 55.92094295 | 2.804374837 | 3.80E-05    | 19.9406093  |
| FLCN         | NM_144997    | 162.1165394 | 10.3049846  | 2.57E-13    | 15.73185654 |
| NASP         | NM_002482    | 283.1648751 | 11.85220255 | 4.51E-24    | 23.89132939 |

|              |              |             |             |             |             |
|--------------|--------------|-------------|-------------|-------------|-------------|
| FOCAD        | NM_017794    | 81.49452145 | 4.12621187  | 1.50E-07    | 19.75044521 |
| RAP1B        | NM_015646    | 86.49892504 | 4.922210396 | 3.39E-07    | 17.57318726 |
| TAF1B        | NM_005680    | 190.7890429 | 4.096894246 | 8.51E-18    | 46.56918912 |
| SPG7         | NM_003119    | 255.3648751 | 19.94866104 | 5.79E-18    | 12.80110352 |
| SERPINB1     | NM_030666    | 82.68796794 | 10.60262442 | 2.70E-05    | 7.798820805 |
| ZCCHC7       | NM_001289120 | 167.832975  | 2.683766439 | 3.10E-16    | 62.53635659 |
| PROS1        | NM_000313    | 53.69452145 | 2.81472797  | 7.22E-05    | 19.07627381 |
| ARHGEF5      | NM_005435    | 229.951768  | 13.9468158  | 5.58E-18    | 16.48776118 |
| RGS5         | NM_001254748 | 103.4176143 | 3.325350194 | 1.27E-09    | 31.09976643 |
| ETS2         | NM_001256295 | 162.1165394 | 10.95394976 | 1.07E-12    | 14.79982499 |
| DHDH         | NM_014475    | 299.9230929 | 12.5062827  | 4.47E-27    | 23.98179379 |
| MCM4         | NM_005914    | 99.44618576 | 14.48911785 | 5.89E-06    | 6.863508656 |
| KCNS3        | NM_002252    | 41.94070721 | 5.176726467 | 0.004084595 | 8.101781595 |
| PLEKHA1      | NM_001001974 | 55.92094295 | 5.39911881  | 0.000214196 | 10.35742033 |
| TRAFD1       | NM_001143906 | 170.0593965 | 9.551723183 | 3.69E-14    | 17.80405412 |
| NKAP         | NM_024528    | 119.3033286 | 4.245774979 | 1.02E-11    | 28.09930559 |
| TMEM131      | NM_015348    | 79.42857143 | 4.47398507  | 2.01E-06    | 17.75342791 |
| BTG1         | NM_001731    | 181.8132108 | 10.78371949 | 8.79E-16    | 16.8599722  |
| LINC00265    | NR_026999    | 130.3451108 | 4.673807776 | 8.88E-12    | 27.88841926 |
| GAS6-AS1     | NR_044995    | 154.0132108 | 20.70805578 | 2.51E-09    | 7.437357345 |
| MAML1        | NM_014757    | 83.72094295 | 7.386921299 | 4.12E-06    | 11.33367198 |
| LLGL2        | NM_001015002 | 93.40880717 | 16.06275605 | 2.64E-05    | 5.815241599 |
| PDCD4        | NM_014456    | 55.76047148 | 0.55247591  | 1.21E-07    | 100.9283309 |
| LOC100272217 | NR_027440    | 186.8176143 | 18.07779222 | 4.76E-12    | 10.33409457 |
| UGDH-AS1     | NR_047679    | 227.5648751 | 9.012017192 | 4.14E-19    | 25.25126952 |
| KCNG3        | NM_172344    | 51.7890429  | 4.302018441 | 0.00066399  | 12.03831262 |
| MRPS15       | NM_031280    | 83.72094295 | 10.91241323 | 2.43E-05    | 7.672083269 |
| PRKRIP1      | NM_024653    | 193.7274965 | 12.14209589 | 2.52E-15    | 15.95502937 |
| CLDN23       | NM_194284    | 61.6373786  | 12.36083742 | 0.002283929 | 4.986505082 |
| C11orf31     | NM_170746    | 201.6703536 | 45.18996849 | 6.35E-08    | 4.462723927 |
| RPS15A       | NM_001019    | 194.920943  | 19.81009046 | 4.22E-13    | 9.839477682 |
| EOMES        | NM_001278183 | 91.6638001  | 19.09982452 | 0.000146398 | 4.79919593  |
| ADPGK        | NR_023319    | 186.9780858 | 9.532188032 | 1.82E-15    | 19.61544246 |
| CASC2        | NR_026939    | 92.69677511 | 3.999015831 | 1.83E-08    | 23.17989701 |
| FBXL5        | NM_001193535 | 91.50332862 | 2.6048359   | 5.62E-09    | 35.12825074 |
| CLDN12       | NM_001185072 | 113.26595   | 5.626710975 | 2.65E-10    | 20.13004587 |
| GART         | NM_001136006 | 162.9890429 | 7.838266926 | 4.88E-14    | 20.79401537 |
| CRTC3        | NM_001042574 | 117.2373786 | 6.434834266 | 5.17E-10    | 18.21917609 |
| NKTR         | NM_005385    | 204.6088072 | 5.034218772 | 7.86E-20    | 40.64360657 |
| EPN2         | NM_148921    | 232.4088072 | 8.671524822 | 4.43E-20    | 26.80137714 |
| CAMK1        | NM_003656    | 118.2703536 | 13.23592719 | 1.02E-07    | 8.935554865 |
| CCDC15       | NM_025004    | 152.9802357 | 1.872655621 | 7.73E-16    | 81.69160098 |
| PSMD4        | NM_002810    | 170.0593965 | 10.71431732 | 3.27E-14    | 15.87216352 |
| GOLGA7       | NM_016099    | 87.53190005 | 3.80026343  | 4.32E-08    | 23.0331138  |
| DTWD1        | NM_001144955 | 276.0945215 | 4.055488021 | 1.20E-29    | 68.07923486 |
| PIGA         | NM_020473    | 106.3560679 | 3.466348976 | 1.87E-10    | 30.68244675 |
| SRSF11       | NM_001190987 | 97.38023574 | 7.241096651 | 1.86E-07    | 13.44827178 |
| ABHD10       | NM_001272069 | 214.6176143 | 9.212543394 | 5.03E-19    | 23.29623918 |
| PICALM       | NM_007166    | 76.65058935 | 4.265963464 | 3.16E-06    | 17.96794323 |
| TLN1         | NM_006289    | 58.69892504 | 9.7893747   | 0.00154331  | 5.99618738  |
| LOC101929224 | NR_110787    | 141.06595   | 6.781110738 | 3.53E-12    | 20.80277929 |
| ZNF165       | NM_003447    | 156.9516643 | 9.746918137 | 2.12E-13    | 16.10269647 |
| GDAP2        | NM_017686    | 156.9516643 | 3.793494401 | 1.42E-14    | 41.37390166 |
| C2orf42      | NM_017880    | 152.9802357 | 9.455120959 | 3.74E-12    | 16.17961699 |
| PEBP1        | NM_002567    | 198.7319    | 9.961160987 | 2.15E-17    | 19.95067646 |
| C21orf2      | NM_001271441 | 129.3121358 | 21.29109931 | 5.29E-07    | 6.073530253 |
| RPGRIP1L     | NM_001127897 | 92.53630363 | 2.482573887 | 1.12E-08    | 37.27434021 |
| RHBDD2       | NM_001040457 | 277.1274965 | 20.13450482 | 5.03E-21    | 13.76380989 |
| ACOX1        | NM_004035    | 142.2593965 | 10.8981565  | 5.13E-11    | 13.05352851 |
| RRP15        | NM_016052    | 141.2264215 | 3.8308647   | 6.21E-13    | 36.86541618 |
| GMDS-AS1     | NR_046229    | 98.41321075 | 2.880320103 | 4.32E-09    | 34.16745613 |
| PDE3B        | NM_000922    | 130.1846393 | 1.292110289 | 8.29E-13    | 100.7535041 |

|                 |              |             |             |             |             |
|-----------------|--------------|-------------|-------------|-------------|-------------|
| KLHDC4          | NM_017566    | 99.76712871 | 12.44213594 | 2.73E-06    | 8.01848888  |
| SEC63           | NM_007214    | 157.9846393 | 4.641081592 | 3.43E-14    | 34.04047875 |
| SNRK            | NM_017719    | 41.78023574 | 4.170278818 | 0.004060873 | 10.01857132 |
| RNF13           | NM_007282    | 289.0417822 | 3.797270872 | 2.58E-27    | 76.11829441 |
| UBE2L3          | NR_046082    | 181.8132108 | 8.980151407 | 8.69E-15    | 20.24611864 |
| MRPL37          | NM_016491    | 144.1648751 | 10.97544463 | 9.51E-11    | 13.13521957 |
| PPAT            | NM_002703    | 185.9451108 | 4.953520962 | 7.22E-18    | 37.53796789 |
| CHAF1B          | NM_005441    | 50.75606789 | 8.309782337 | 0.00247532  | 6.107990057 |
| OSBPL6          | NM_001201480 | 156.0791608 | 3.486423367 | 4.95E-15    | 44.76770155 |
| SLC25A24        | NM_013386    | 78.55606789 | 3.140863972 | 2.97E-07    | 25.01097424 |
| CPSF6           | NM_007007    | 155.0461858 | 4.100157909 | 6.75E-15    | 37.81468646 |
| RPL36A          | NM_021029    | 109.2945215 | 18.0002327  | 2.94E-06    | 6.071839363 |
| C9orf114        | NM_016390    | 147.2638001 | 17.78345789 | 1.72E-09    | 8.280942942 |
| NEIL2           | NM_145043    | 140.032975  | 5.98204679  | 9.91E-13    | 23.40887324 |
| SBF2            | NM_030962    | 37.96927864 | 3.390868884 | 0.003600964 | 11.19750717 |
| SLC5A3          | NM_006933    | 184.7516643 | 7.473716399 | 1.21E-16    | 24.72018664 |
| SCLT1           | NM_144643    | 182.8461858 | 2.347457659 | 7.64E-18    | 77.89115387 |
| ZHX1-C8orf76    | NM_001204180 | 105.3230929 | 10.88492624 | 1.85E-07    | 9.676050212 |
| EP300-AS1       | NR_110514    | 73.55166431 | 8.6666138   | 5.11E-05    | 8.486782266 |
| CPNE8           | NM_153634    | 119.3033286 | 2.197955248 | 2.31E-11    | 54.27923464 |
| ZFP62           | NM_001172638 | 156.0791608 | 10.26735042 | 1.31E-12    | 15.20150325 |
| ALAD            | NM_000031    | 165.9274965 | 10.42638892 | 2.24E-13    | 15.91418636 |
| PIGO            | NM_032634    | 209.6132108 | 18.20927    | 2.99E-15    | 11.51134619 |
| SAP30BP         | NM_013260    | 80.62201792 | 18.09908466 | 0.00092917  | 4.454480403 |
| MCL1            | NM_182763    | 179.9077322 | 24.46872858 | 8.74E-11    | 7.352557433 |
| ATE1-AS1        | NR_120495    | 143.1319    | 10.84490908 | 2.69E-11    | 13.19807285 |
| KIAA1551        | NM_018169    | 150.0417822 | 3.762303392 | 9.68E-15    | 39.88029847 |
| CCDC51          | NM_001256968 | 167.9934465 | 11.1888316  | 6.87E-14    | 15.01438688 |
| CHERP           | NM_006387    | 117.5583215 | 13.86565455 | 5.60E-08    | 8.478382406 |
| RECQL5          | NM_004259    | 118.4308251 | 14.22642783 | 7.89E-08    | 8.324705718 |
| KIF21A          | NM_017641    | 141.2264215 | 3.571755366 | 2.07E-13    | 39.53978003 |
| CDC42SE2        | NM_001038702 | 208.7407072 | 4.438678334 | 3.73E-19    | 47.02767164 |
| COL12A1         | NM_080645    | 47.97808581 | 3.227664157 | 0.000277647 | 14.86464622 |
| ACOT13          | NM_018473    | 237.4132108 | 9.726929441 | 1.73E-20    | 24.40782697 |
| AFF1            | NM_001166693 | 155.0461858 | 5.816842591 | 1.64E-13    | 26.65469855 |
| ARHGAP19-SLIT1  | NR_037909    | 146.0703536 | 5.434694499 | 8.63E-13    | 26.87738081 |
| SNRPA           | NM_004596    | 130.3451108 | 18.19716424 | 3.33E-08    | 7.162935339 |
| COX11           | NR_027942    | 241.3846393 | 23.17156897 | 4.05E-16    | 10.41727643 |
| PPP6R3          | NM_001164162 | 109.2945215 | 8.037223057 | 2.66E-08    | 13.59854277 |
| RSPH3           | NM_031924    | 221.6879679 | 5.737888874 | 6.14E-22    | 38.63580714 |
| TRAF6           | NM_145803    | 246.5495144 | 4.54029833  | 5.98E-25    | 54.30249214 |
| DIRC2           | NM_032839    | 164.0220179 | 3.532123155 | 3.98E-16    | 46.43723073 |
| TAF11           | NM_001270488 | 145.1978501 | 8.606132214 | 5.02E-12    | 16.87144079 |
| RAB22A          | NM_020673    | 47.65714286 | 5.329694371 | 0.001283725 | 8.941815334 |
| VPS13D          | NM_018156    | 55.76047148 | 4.809939432 | 0.000256281 | 11.59275959 |
| ZNF697          | NM_001080470 | 68.54726073 | 7.025334997 | 6.94E-05    | 9.757151901 |
| NAAA            | NM_001042402 | 195.953918  | 7.36564073  | 5.49E-18    | 26.6037844  |
| STK38           | NM_007271    | 242.5780858 | 5.807640093 | 2.46E-22    | 41.76878765 |
| TMEM117         | NM_032256    | 37.96927864 | 2.328451885 | 0.003578023 | 16.30666233 |
| CRCP            | NR_024548    | 160.2110608 | 7.142116321 | 8.39E-14    | 22.43187504 |
| C11orf71        | NM_019021    | 152.1077322 | 12.36312404 | 1.40E-11    | 12.3033411  |
| ADAMTS6         | NM_197941    | 61.6373786  | 0.87983872  | 9.07E-07    | 70.05531489 |
| PLEK2           | NM_016445    | 83.56047148 | 12.27476045 | 5.87E-05    | 6.807503235 |
| FAM189B         | NM_198264    | 118.2703536 | 9.978148242 | 5.91E-09    | 11.85293611 |
| PRELID2         | NM_182960    | 195.632975  | 2.680393441 | 5.67E-20    | 72.98666383 |
| NDUFB4          | NM_004547    | 101.6726073 | 12.41842071 | 6.33E-07    | 8.187241327 |
| ANKHD1-EIF4EBP3 | NM_020690    | 172.9978501 | 6.471643133 | 1.64E-15    | 26.73167332 |
| HIPK3           | NM_001278163 | 48.85058935 | 4.437716258 | 0.001349575 | 11.00804705 |
| DEPDC1          | NM_001114120 | 104.2901179 | 6.17062528  | 1.08E-08    | 16.90106158 |
| PIN4            | NM_006223    | 60.76487506 | 6.536410093 | 0.000314097 | 9.29636822  |
| POLR2F          | NM_001301129 | 150.0417822 | 9.161210976 | 9.54E-13    | 16.37794202 |
| KBTBD4          | NR_024222    | 193.7274965 | 17.81708485 | 4.48E-14    | 10.87313093 |



|                 |              |             |             |             |             |
|-----------------|--------------|-------------|-------------|-------------|-------------|
| NAGA            | NM_000262    | 183.8791608 | 6.84971306  | 2.83E-17    | 26.84479761 |
| ZNF543          | NM_213598    | 207.7077322 | 9.077942227 | 1.99E-18    | 22.88048624 |
| ZNF700          | NM_144566    | 217.5560679 | 5.850361439 | 6.20E-21    | 37.18677387 |
| FGF2            | NM_002006    | 45.75166431 | 3.641688006 | 0.000489662 | 12.56331246 |
| MRPL3           | NM_007208    | 158.1451108 | 4.044658276 | 5.01E-15    | 39.09974589 |
| MTHFD2L         | NM_001144978 | 138.1274965 | 3.497420173 | 3.87E-13    | 39.49410984 |
| SPTAN1          | NM_001130438 | 287.1363036 | 11.99813017 | 2.64E-23    | 23.93175434 |
| SETD6           | NM_001160305 | 174.9033286 | 41.34423735 | 4.40E-07    | 4.230416131 |
| MARVELD2        | NM_001244734 | 169.898925  | 7.970866053 | 4.26E-14    | 21.31498935 |
| SARS2           | NM_001145901 | 70.9341537  | 13.41014264 | 0.000452496 | 5.289589799 |
| ARIH2           | NM_006321    | 184.9121358 | 8.243222145 | 6.64E-16    | 22.43202143 |
| PIDD1           | NM_145887    | 128.2791608 | 13.8220584  | 6.59E-09    | 9.280756678 |
| NOS1AP          | NM_001164757 | 49.88356436 | 5.067556843 | 0.001459839 | 9.843710866 |
| ZNF573          | NM_001172690 | 88.40440358 | 0.818344656 | 6.06E-10    | 108.0283264 |
| SPAG5-AS1       | NR_040012    | 325.8176143 | 18.62678351 | 1.83E-25    | 17.49188818 |
| CLEC16A         | NM_001243403 | 167.832975  | 7.733732247 | 6.78E-14    | 21.70142043 |
| KLF10           | NM_005655    | 150.5231966 | 26.25454128 | 3.62E-08    | 5.733225159 |
| SLC52A2         | NM_001253816 | 271.2505893 | 26.70479491 | 9.04E-18    | 10.15737399 |
| XPNPEP3         | NM_022098    | 172.8373786 | 6.300212174 | 1.48E-15    | 27.43358062 |
| PPP2R1A         | NM_014225    | 64.73630363 | 10.68995597 | 0.000540179 | 6.055806387 |
| HSBP1           | NM_001537    | 115.4923715 | 18.75956143 | 2.63E-06    | 6.156453707 |
| GTPBP1          | NM_004286    | 53.85499293 | 11.47281163 | 0.004373538 | 4.694140778 |
| MRPS25          | NM_022497    | 309.0593965 | 11.87184069 | 1.09E-27    | 26.03298045 |
| STIL            | NM_001282937 | 245.3560679 | 4.749235425 | 8.51E-24    | 51.66222474 |
| UBE2M           | NM_003969    | 157.2726073 | 15.89020501 | 1.38E-10    | 9.897456146 |
| ATG7            | NM_001136031 | 123.2747572 | 6.008621606 | 1.92E-10    | 20.51631227 |
| SPIN4           | NM_001012968 | 109.2945215 | 2.517218266 | 4.43E-12    | 43.4187702  |
| ADAT1           | NR_036460    | 153.1407072 | 8.850802719 | 1.42E-12    | 17.30246533 |
| LINC01234       | NR_110025    | 89.4373786  | 10.56370224 | 5.15E-06    | 8.466480463 |
| TOMM22          | NM_020243    | 170.9319    | 31.81868286 | 3.07E-08    | 5.372060835 |
| SEPT7-AS1       | NR_120511    | 84.43297501 | 3.690794996 | 2.52E-07    | 22.87663636 |
| AZIN1           | NM_015878    | 317.0022537 | 11.73311919 | 1.93E-27    | 27.01773063 |
| NEDD8-MDP1      | NM_001199823 | 160.0505893 | 14.87588462 | 1.76E-11    | 10.75906364 |
| HNRNPUL2-BSCCL2 | NR_037946    | 118.4308251 | 21.25079255 | 3.69E-06    | 5.573007445 |
| SCAF4           | NM_001145445 | 201.6703536 | 7.093219048 | 8.46E-18    | 28.43142898 |
| NDEL1           | NM_001025579 | 197.698925  | 8.651134866 | 9.43E-17    | 22.85236886 |
| NOSIP           | NM_001270960 | 294.2066572 | 12.06247994 | 5.69E-25    | 24.39022976 |
| RHBDD1          | NM_001167608 | 150.0417822 | 4.836866598 | 2.43E-13    | 31.02045077 |
| ZNF205          | NM_001042428 | 138.1274965 | 13.83132403 | 1.82E-09    | 9.986570781 |
| C1orf50         | NR_040733    | 219.7824894 | 9.962496543 | 2.77E-19    | 22.06098526 |
| DHX8            | NM_004941    | 136.2220179 | 5.566597094 | 1.54E-12    | 24.47132703 |
| UBE2D2          | NM_003339    | 141.06595   | 7.305823158 | 1.80E-11    | 19.30870033 |
| AP4B1           | NM_001253852 | 159.0176143 | 6.936146284 | 5.82E-15    | 22.92593146 |
| TROAP           | NM_001100620 | 129.1516643 | 28.4513348  | 0.000103521 | 4.539388581 |
| BRAT1           | NM_152743    | 98.41321075 | 19.58063873 | 3.71E-05    | 5.026047012 |
| DOLPP1          | NM_001135917 | 123.2747572 | 14.50200526 | 1.98E-08    | 8.500531822 |
| NLRP2           | NM_001174082 | 49.72309288 | 8.651183557 | 0.004397625 | 5.747548015 |
| CBX1            | NM_006807    | 145.3583215 | 12.26499983 | 1.34E-10    | 11.85147359 |
| SLC25A37        | NM_016612    | 110.3274965 | 10.67346808 | 5.21E-08    | 10.33661183 |
| BLVRB           | NM_000713    | 200.7978501 | 13.19307303 | 1.28E-15    | 15.21994532 |
| PSMD13          | NM_175932    | 170.0593965 | 13.42532806 | 7.91E-13    | 12.66705706 |
| ATP8B3          | NR_047593    | 95.47475719 | 7.180216056 | 2.56E-07    | 13.29691982 |
| TMEM68          | NM_152417    | 219.6220179 | 5.213013383 | 7.39E-21    | 42.12957109 |
| PALB2           | NM_024675    | 141.2264215 | 5.488901285 | 6.65E-13    | 25.72945188 |
| ERMP1           | NM_024896    | 213.5846393 | 6.820346735 | 2.97E-19    | 31.31580367 |
| FNTB            | NM_002028    | 90.47035361 | 8.476038158 | 8.52E-07    | 10.67366049 |
| PPP1CC          | NM_001244974 | 201.6703536 | 11.92007848 | 1.68E-16    | 16.91854244 |
| COQ10B          | NM_025147    | 191.8220179 | 7.41303909  | 5.71E-17    | 25.87629926 |
| NOB1            | NR_074074    | 199.7648751 | 14.56991528 | 3.36E-15    | 13.71077808 |
| ZC2HC1A         | NM_016010    | 269.1846393 | 3.412984573 | 1.61E-27    | 78.87074598 |
| ELAC2           | NM_173717    | 134.3165394 | 11.10584453 | 2.31E-10    | 12.09422111 |
| NBPF1           | NM_017940    | 398.8177181 | 16.3525781  | 1.03E-32    | 24.38867532 |

|                |              |             |             |             |             |
|----------------|--------------|-------------|-------------|-------------|-------------|
| NR1H2          | NM_007121    | 71.64618576 | 13.80715133 | 0.00075628  | 5.189063556 |
| DCP1B          | NM_152640    | 155.0461858 | 5.641347417 | 4.68E-14    | 27.48389247 |
| TRPM4          | NM_001195227 | 243.2901179 | 9.792226791 | 1.26E-20    | 24.84522908 |
| PPAN           | NM_020230    | 90.47035361 | 9.879888304 | 1.08E-06    | 9.157021904 |
| UFL1           | NM_015323    | 216.8440358 | 2.295458639 | 5.91E-24    | 94.46654021 |
| THAP1          | NM_199003    | 105.3230929 | 13.84218483 | 1.69E-06    | 7.608848903 |
| MRPL42         | NR_038161    | 134.1560679 | 5.897977225 | 2.81E-12    | 22.74611494 |
| KIFAP3         | NM_001204516 | 66.80225365 | 0.976770125 | 3.15E-07    | 68.39096727 |
| CNIH4          | NM_001277200 | 144.1648751 | 8.621755144 | 1.65E-11    | 16.72105884 |
| COA5           | NM_001008215 | 186.8176143 | 12.67820354 | 1.47E-14    | 14.735338   |
| MIR181A2HG     | NR_038975    | 61.79785007 | 3.533955128 | 7.31E-06    | 17.48688023 |
| CDKN2B         | NM_078487    | 211.8396323 | 6.439405725 | 1.60E-21    | 32.89738856 |
| ABCF3          | NM_018358    | 80.62201792 | 10.5947046  | 3.97E-05    | 7.609652273 |
| WASF1          | NM_003931    | 44.87916077 | 4.684695512 | 0.002365238 | 9.579952561 |
| DDX23          | NM_004818    | 129.3121358 | 10.27941088 | 6.04E-10    | 12.57972244 |
| XPA            | NR_027302    | 195.7934465 | 8.49666637  | 2.71E-17    | 23.04356061 |
| PTPN1          | NM_002827    | 119.3033286 | 7.78465883  | 1.71E-09    | 15.32544087 |
| RABIF          | NM_002871    | 219.6220179 | 14.44189641 | 1.11E-17    | 15.20728384 |
| CDC26          | NM_139286    | 100.4791608 | 12.23766522 | 2.21E-06    | 8.210647943 |
| MCAT           | NM_173467    | 169.898925  | 13.13734809 | 4.96E-13    | 12.932513   |
| EXOC2          | NR_073064    | 95.47475719 | 3.584653379 | 9.87E-09    | 26.63430661 |
| FARP2          | NM_014808    | 244.3230929 | 9.079880359 | 3.07E-21    | 26.90818416 |
| ORAOV1         | NM_153451    | 80.78248939 | 11.23800528 | 5.32E-05    | 7.188329905 |
| GJB4           | NM_153212    | 58.69892504 | 10.99921502 | 0.001472739 | 5.336646746 |
| CEP89          | NM_032816    | 86.49892504 | 4.479295429 | 4.51E-07    | 19.31083279 |
| MAPKAPK5       | NM_139078    | 105.4835644 | 6.011720595 | 3.98E-09    | 17.54631851 |
| EMC3           | NM_018447    | 129.3121358 | 7.354654699 | 5.78E-11    | 17.58235309 |
| ZBTB49         | NM_145291    | 182.8461858 | 7.627459097 | 2.37E-16    | 23.97209653 |
| RNF135         | NM_001184992 | 212.5516643 | 7.042491764 | 1.10E-19    | 30.18131528 |
| MOB1A          | NM_018221    | 231.5363036 | 7.046750957 | 1.90E-21    | 32.85717134 |
| PLA2G6         | NM_001004426 | 63.70332862 | 7.279761503 | 0.000293756 | 8.750743907 |
| THUMPD2        | NR_028102    | 206.5142857 | 3.962325129 | 2.00E-20    | 52.11947001 |
| ZNF530         | NM_020880    | 66.64178218 | 7.312865899 | 5.19E-05    | 9.112950121 |
| RPL36AL        | NM_001001    | 171.9648751 | 24.91820938 | 2.18E-09    | 6.901173051 |
| HMCN1          | NM_031935    | 44.87916077 | 1.747299729 | 0.000555531 | 25.68486678 |
| TUBA4A         | NM_006000    | 269.3451108 | 48.74893589 | 5.33E-13    | 5.525148517 |
| FDPS           | NM_001135822 | 92.53630363 | 17.34295679 | 8.02E-05    | 5.335670541 |
| LRRC1          | NM_018214    | 160.0505893 | 5.177776236 | 3.00E-14    | 30.91106723 |
| RABGGTB        | NR_073562    | 211.6791608 | 25.89006591 | 6.49E-13    | 8.176076549 |
| TNPO1          | NM_153188    | 245.3560679 | 4.314583048 | 6.52E-24    | 56.86669261 |
| PCK2           | NM_001291556 | 201.6703536 | 17.15322976 | 5.45E-15    | 11.75699017 |
| PEX13          | NM_002618    | 167.9934465 | 3.497106184 | 8.07E-17    | 48.03784548 |
| TAF12          | NM_005644    | 294.9186893 | 9.468130386 | 2.26E-26    | 31.14856654 |
| RPS3           | NM_001260506 | 267.2791608 | 26.90832339 | 3.48E-18    | 9.932954828 |
| ARL5B          | NM_178815    | 138.1274965 | 5.976199699 | 2.49E-12    | 23.11293187 |
| IPO9           | NM_018085    | 172.9978501 | 11.34174372 | 7.64E-14    | 15.2531969  |
| C6orf7         | NM_001243308 | 45.75166431 | 3.047849999 | 0.000465384 | 15.01112729 |
| SCARB2         | NM_001204255 | 93.56927864 | 7.058473114 | 3.79E-07    | 13.25630588 |
| RPS6KA4        | NM_003942    | 155.0461858 | 7.055419271 | 9.66E-14    | 21.97547443 |
| CNEP1R1        | NR_104042    | 109.4549929 | 3.702860306 | 3.64E-11    | 29.55957932 |
| ARL6IP1        | NM_015161    | 235.5077322 | 16.6595968  | 1.09E-17    | 14.13646051 |
| TRMT61B        | NM_017910    | 121.2088072 | 5.6022253   | 2.14E-10    | 21.63583231 |
| IQCH           | NM_001031715 | 214.6176143 | 3.276671251 | 1.11E-20    | 65.49867163 |
| MRPS27         | NM_015084    | 139.320943  | 5.607240803 | 2.53E-12    | 24.84661313 |
| TMEM256-PLSCR3 | NR_037719    | 195.7934465 | 27.72316472 | 1.38E-11    | 7.062449343 |
| CRYZ           | NM_001889    | 144.0044036 | 3.567424596 | 4.22E-14    | 40.3664884  |
| PPP1CB         | NM_206876    | 77.52309288 | 5.160184941 | 2.51E-06    | 15.02331675 |
| CTU1           | NM_145232    | 132.2505893 | 10.18110923 | 3.65E-10    | 12.98980164 |
| RASD1          | NM_001199989 | 89.4373786  | 21.11996381 | 0.001509826 | 4.234731622 |
| CBLN3          | NM_001039771 | 58.69892504 | 12.16079389 | 0.003129176 | 4.826899094 |
| DSTYK          | NM_199462    | 233.6022537 | 6.459430302 | 6.19E-21    | 36.16452887 |
| SLC25A21-AS1   | NR_033240    | 205.6417822 | 40.81958421 | 8.54E-09    | 5.037821579 |

|           |              |             |             |             |             |
|-----------|--------------|-------------|-------------|-------------|-------------|
| LOC727751 | NR_102748    | 43.68571429 | 5.530861937 | 0.003893907 | 7.898536392 |
| ARID1A    | NM_139135    | 65.60880717 | 7.765412554 | 0.000173259 | 8.448850169 |
| FLJ31104  | NR_102755    | 213.5846393 | 13.5340636  | 4.70E-17    | 15.78126464 |
| GALNT5    | NM_014568    | 60.76487506 | 3.26447555  | 1.62E-05    | 18.61397769 |
| ARHGEF18  | NM_015318    | 63.8638001  | 7.625436907 | 0.00029983  | 8.375100453 |
| ALAS1     | NM_000688    | 291.1077322 | 15.3036461  | 2.71E-24    | 19.02211606 |
| HOXB6     | NM_018952    | 146.0703536 | 29.57914753 | 5.61E-07    | 4.938288146 |
| RAB28     | NM_001017979 | 104.2901179 | 2.978381763 | 4.71E-10    | 35.01569851 |
| ZNF649    | NM_023074    | 63.70332862 | 4.483943619 | 2.65E-05    | 14.20698698 |
| LOC730102 | NR_037167    | 101.5121358 | 3.60951817  | 2.28E-09    | 28.12345887 |
| SMARCE1   | NM_003079    | 122.4022537 | 3.717065155 | 3.91E-12    | 32.92981117 |
| ZNF174    | NM_001032292 | 159.1780858 | 13.76478298 | 5.25E-12    | 11.56415514 |
| ZSCAN2    | NM_017894    | 99.28571429 | 12.40610837 | 1.14E-06    | 8.002970097 |
| SAP30     | NM_003864    | 218.5890429 | 8.005157225 | 6.55E-21    | 27.30602745 |
| CLNS1A    | NM_001293    | 196.8264215 | 4.854814379 | 1.94E-19    | 40.54252256 |
| ARF4      | NM_001660    | 186.1055823 | 10.68553126 | 9.45E-15    | 17.41659611 |
| CSTF3-AS1 | NR_034027    | 122.4022537 | 4.225181522 | 1.67E-11    | 28.96970296 |
| DCAF7     | NR_073585    | 220.8154644 | 12.16292744 | 1.63E-17    | 18.15479583 |
| SDHD      | NM_001276506 | 151.2352287 | 12.41339667 | 1.36E-11    | 12.18322693 |
| MRPS28    | NM_014018    | 199.7648751 | 5.701290652 | 3.06E-18    | 35.03853553 |
| CKS2      | NM_001827    | 198.8923715 | 14.17663645 | 9.97E-16    | 14.0295882  |
| FAM46A    | NM_017633    | 272.2835644 | 7.986394105 | 1.49E-27    | 34.0934295  |
| VHL       | NM_000551    | 187.8505893 | 13.82475346 | 3.04E-14    | 13.58798838 |
| RFC5      | NM_001206801 | 139.1604715 | 13.3944228  | 9.22E-10    | 10.38943399 |
| TMEM64    | NM_001146273 | 130.1846393 | 7.842506881 | 3.55E-11    | 16.59987569 |
| PSMB2     | NM_002794    | 181.9736822 | 9.169210472 | 5.61E-15    | 19.84616699 |
| KIAA0825  | NM_001145678 | 93.72975012 | 1.706636228 | 1.01E-08    | 54.92075499 |
| PTPDC1    | NM_177995    | 158.1451108 | 3.434257931 | 1.29E-15    | 46.04928168 |
| MACROD1   | NM_014067    | 106.5165394 | 8.972526369 | 5.05E-08    | 11.87141001 |
| TMEM243   | NM_024315    | 87.53190005 | 12.27245542 | 1.84E-05    | 7.13238688  |
| PLAU      | NM_001145031 | 71.80665724 | 10.95122647 | 0.000208778 | 6.556951171 |
| C14orf28  | NM_001017923 | 161.0835644 | 1.046893885 | 2.46E-22    | 153.8680918 |
| LYRM9     | NM_001076680 | 127.2461858 | 5.821896592 | 1.12E-11    | 21.85648332 |
| SKA3      | NM_145061    | 152.9802357 | 4.800717884 | 2.75E-15    | 31.86611657 |
| ANKRD16   | NM_019046    | 255.3648751 | 8.771295572 | 5.38E-23    | 29.11370082 |
| UBL7-AS1  | NR_038449    | 121.2088072 | 6.186948715 | 2.54E-10    | 19.59104766 |
| TRIM2     | NM_015271    | 49.88356436 | 5.671215902 | 0.001413133 | 8.795920526 |
| COQ10A    | NM_144576    | 180.9407072 | 26.74333087 | 5.00E-10    | 6.765825397 |
| RICTOR    | NM_001285439 | 122.2417822 | 2.6251786   | 8.24E-12    | 46.56512976 |
| PYROXD2   | NM_032709    | 237.5736822 | 14.12437811 | 1.56E-18    | 16.82011628 |
| RALGAPA1  | NM_194301    | 120.1758322 | 2.298578983 | 2.47E-11    | 52.28266379 |
| WBSR22    | NM_001202560 | 161.9560679 | 15.62855663 | 2.97E-11    | 10.36282951 |
| LSM10     | NM_032881    | 232.5692786 | 15.30462554 | 1.57E-18    | 15.19601235 |
| ZNF805    | NM_001145078 | 172.9978501 | 5.991530929 | 2.63E-16    | 28.87373063 |
| GOLGA5    | NM_005113    | 137.2549929 | 6.055957122 | 2.17E-12    | 22.66445917 |
| RABEPK    | NM_001174152 | 220.4945215 | 8.167314262 | 3.77E-19    | 26.99718835 |
| NRD1      | NM_001101662 | 94.60225365 | 6.623336344 | 7.69E-08    | 14.28317222 |
| MFAP3     | NM_001135037 | 168.153918  | 6.751672068 | 9.56E-16    | 24.90552211 |
| MRM1      | NM_024864    | 92.69677511 | 10.3885619  | 2.60E-06    | 8.922965083 |
| CCDC117   | NM_001284265 | 50.75606789 | 7.807020983 | 0.002032433 | 6.50133617  |
| PIK3C3    | NM_002647    | 89.59785007 | 2.835772347 | 2.74E-08    | 31.59557224 |
| KGFLP1    | NR_047527    | 56.79344649 | 1.572740224 | 2.23E-05    | 36.11114258 |
| CDH24     | NM_022478    | 112.3934465 | 11.90924628 | 5.64E-08    | 9.437494522 |
| CCT6B     | NM_001193530 | 232.4088072 | 3.488111093 | 2.03E-24    | 66.62884322 |
| BUB3      | NM_004725    | 105.4835644 | 12.45915407 | 2.47E-07    | 8.466350423 |
| BET1L     | NM_016526    | 213.5846393 | 27.17946468 | 1.04E-12    | 7.858309272 |
| CDKN1B    | NM_004064    | 67.83522867 | 12.94843131 | 0.000997185 | 5.238876202 |
| CDK5RAP3  | NM_001278216 | 102.5451108 | 20.13059528 | 2.66E-05    | 5.093992967 |
| CEBPZOS   | NR_037880    | 169.186893  | 19.63732648 | 5.75E-11    | 8.615576726 |
| ATP5O     | NM_001697    | 198.7319    | 11.38949131 | 1.73E-16    | 17.44870729 |
| ZFP41     | NM_001271156 | 140.032975  | 29.81363184 | 1.10E-06    | 4.69694453  |
| MERTK     | NM_006343    | 144.0044036 | 6.547728444 | 1.78E-12    | 21.99303237 |

|              |              |             |             |             |             |
|--------------|--------------|-------------|-------------|-------------|-------------|
| METAP2       | NM_006838    | 229.4703536 | 5.213597239 | 1.55E-22    | 44.01382444 |
| PANK3        | NM_024594    | 86.65939651 | 7.861501928 | 1.57E-06    | 11.02326213 |
| CSAD         | NM_001244705 | 108.2615464 | 10.09372989 | 5.67E-08    | 10.72562349 |
| EIF4A3       | NM_014740    | 324.0726073 | 15.99806375 | 7.10E-27    | 20.25698936 |
| TMEM106B     | NM_018374    | 166.9604715 | 4.627415535 | 1.75E-16    | 36.08071724 |
| TMEM86A      | NM_153347    | 94.60225365 | 12.76390121 | 4.76E-06    | 7.411703687 |
| CSPG4        | NM_001897    | 113.4264215 | 11.07143903 | 2.67E-08    | 10.24495742 |
| OXCT1        | NM_000436    | 165.0549929 | 3.238453902 | 3.97E-16    | 50.96722014 |
| CCDC125      | NM_001297696 | 215.6505893 | 7.202624948 | 4.21E-19    | 29.94055513 |
| EIF1B        | NM_005875    | 137.0945215 | 3.895332777 | 4.24E-14    | 35.19455957 |
| ZNF620       | NM_001256168 | 112.232975  | 7.43779842  | 6.23E-09    | 15.08954245 |
| SP5          | NM_001003845 | 53.85499293 | 5.666252187 | 0.000408166 | 9.504517474 |
| LOC101928388 | NR_120334    | 209.6132108 | 8.134150917 | 2.46E-18    | 25.76952566 |
| PGAP3        | NM_001291733 | 113.26595   | 7.815299869 | 6.84E-09    | 14.49284761 |
| COG7         | NM_153603    | 157.9846393 | 5.661150435 | 2.80E-14    | 27.90680819 |
| EXOC7        | NM_001282313 | 108.4220179 | 18.81792572 | 4.73E-06    | 5.761634918 |
| SLC16A1      | NM_003051    | 151.0747572 | 7.042999333 | 7.60E-13    | 21.45034382 |
| CD99         | NM_002414    | 53.69452145 | 10.88216005 | 0.004668884 | 4.934178619 |
| ZNF484       | NM_001261459 | 167.9934465 | 4.927692733 | 2.49E-16    | 34.0917049  |
| TLE6         | NM_001143986 | 77.52309288 | 6.181641063 | 6.73E-06    | 12.54085963 |
| FGFR1OP2     | NM_001171887 | 165.9274965 | 4.796911497 | 2.75E-16    | 34.59048526 |
| NISCH        | NM_007184    | 111.2       | 11.6248652  | 5.00E-08    | 9.565702317 |
| HMG3-AS1     | NR_040671    | 143.1319    | 28.92294325 | 2.00E-06    | 4.948732182 |
| ZFYVE1       | NM_021260    | 89.4373786  | 7.287987981 | 1.35E-06    | 12.27188887 |
| TMEM198B     | NR_036477    | 143.1319    | 28.64848361 | 5.82E-07    | 4.996142274 |
| C18orf8      | NR_075076    | 142.098925  | 10.19404003 | 3.25E-11    | 13.93941211 |
| SERPINI1     | NM_005025    | 141.2264215 | 2.71237207  | 7.32E-14    | 52.06749586 |
| ARSD         | NM_001669    | 71.48571429 | 5.809952523 | 6.48E-06    | 12.30401006 |
| EEF1DP3      | NR_027062    | 41.78023574 | 3.672727251 | 0.00097999  | 11.37580683 |
| BBIP1        | NM_001195307 | 67.67475719 | 10.5064968  | 0.000261763 | 6.441229509 |
| SRP68        | NR_048541    | 270.3780858 | 15.24347183 | 1.03E-21    | 17.73730347 |
| SMC2         | NM_001042550 | 101.3516643 | 2.335250146 | 4.56E-10    | 43.40077421 |
| SELK         | NM_021237    | 81.49452145 | 9.352310104 | 1.38E-05    | 8.713838672 |
| ZFYVE16      | NM_014733    | 273.3165394 | 3.524579194 | 2.56E-27    | 77.54586415 |
| USE1         | NM_018467    | 125.3407072 | 7.903821772 | 1.35E-10    | 15.85824059 |
| HELB         | NM_033647    | 162.1165394 | 2.876904358 | 2.46E-17    | 56.35103542 |
| NBEAL1       | NM_001114132 | 120.3363036 | 2.308593787 | 2.04E-11    | 52.12536926 |
| CARKD        | NM_001242883 | 95.47475719 | 8.038410204 | 2.35E-07    | 11.87731837 |
| CCNT1        | NM_001277842 | 56.79344649 | 9.263866412 | 0.000804766 | 6.130641782 |
| TMEM9B-AS1   | NR_073431    | 203.7363036 | 12.80498634 | 1.04E-16    | 15.91070059 |
| METTTL20     | NM_001135863 | 115.3319    | 9.736329107 | 1.55E-08    | 11.84552194 |
| NEDD8        | NM_006156    | 160.0505893 | 8.990563733 | 9.96E-14    | 17.80206382 |
| RGS9         | NM_001081955 | 66.80225365 | 10.43791336 | 0.000610561 | 6.399962459 |
| LOC143666    | NR_026967    | 127.4066572 | 24.03146178 | 2.94E-06    | 5.30166073  |
| DCAF11       | NM_181357    | 72.67916077 | 10.31659075 | 9.21E-05    | 7.044881644 |
| BUD31        | NM_003910    | 201.8308251 | 18.35487104 | 4.10E-14    | 10.99603613 |
| CDC42        | NM_001039802 | 124.1472607 | 7.291346416 | 5.16E-10    | 17.02665786 |
| LOC100129434 | NR_125368    | 53.85499293 | 7.596305434 | 0.000973871 | 7.089629742 |
| LAMP2        | NM_013995    | 140.032975  | 1.306467502 | 1.82E-16    | 107.1844304 |
| ABHD4        | NM_022060    | 70.9341537  | 5.767875833 | 1.89E-05    | 12.2981416  |
| PIGV         | NM_017837    | 150.2022537 | 16.93676743 | 8.74E-10    | 8.868413305 |
| ARMC10       | NM_001161010 | 79.5890429  | 6.438477483 | 4.98E-06    | 12.36146948 |
| NPEPPS       | NM_006310    | 92.37583215 | 7.742038724 | 8.77E-07    | 11.93171921 |
| UVRAG        | NM_003369    | 167.120943  | 3.59067387  | 1.00E-15    | 46.54305821 |
| HAUS5        | NM_015302    | 147.2638001 | 11.0563301  | 1.05E-11    | 13.31941057 |
| SPIN1        | NM_006717    | 47.65714286 | 5.620810611 | 0.001367876 | 8.478695717 |
| PUM1         | NM_014676    | 211.5186893 | 6.928180564 | 4.10E-18    | 30.53019293 |
| HSPB11       | NM_016126    | 196.8264215 | 5.992181828 | 9.46E-19    | 32.84720443 |
| ACADM        | NM_001286043 | 121.2088072 | 7.628773287 | 1.01E-09    | 15.88837453 |
| LRR6         | NM_012472    | 80.62201792 | 3.723953841 | 2.11E-07    | 21.64957499 |
| KIF16B       | NM_001199865 | 99.44618576 | 3.474020791 | 2.96E-09    | 28.62567375 |
| NPHP3-ACAD11 | NR_037804    | 58.69892504 | 4.78481748  | 0.000135772 | 12.2677459  |

|              |              |             |             |             |             |
|--------------|--------------|-------------|-------------|-------------|-------------|
| TGDS         | NM_014305    | 191.8220179 | 5.486874095 | 1.95E-18    | 34.96016395 |
| SPOPL        | NM_001001664 | 71.64618576 | 3.672555313 | 1.33E-06    | 19.50853824 |
| RIMS2        | NM_001100117 | 29.86595002 | 0.717646563 | 0.003753467 | 41.61651646 |
| C8orf37      | NM_177965    | 235.5077322 | 10.16543665 | 6.17E-20    | 23.16749789 |
| C2orf70      | NM_001105519 | 48.85058935 | 6.671611799 | 0.003487778 | 7.322157047 |
| MRPL44       | NM_022915    | 160.0505893 | 8.057809847 | 8.79E-14    | 19.86279056 |
| LOC100507283 | NR_103862    | 294.0461858 | 7.249997532 | 2.23E-27    | 40.55810839 |
| UBXN1        | NM_001286077 | 114.4593965 | 24.61309999 | 4.96E-05    | 4.650344595 |
| CCNH         | NM_001199189 | 155.9186893 | 7.321807909 | 1.92E-13    | 21.29510788 |
| EGFR         | NM_201284    | 56.63297501 | 6.724065605 | 0.000251725 | 8.422430467 |
| SECISBP2     | NM_024077    | 244.4835644 | 7.317055257 | 1.06E-22    | 33.4128356  |
| CALM2        | NM_001743    | 244.3230929 | 8.156843714 | 1.27E-22    | 29.95314137 |
| TBC1D7       | NM_001258457 | 258.3033286 | 7.654649058 | 4.61E-24    | 33.74463371 |
| RPIA         | NM_144563    | 106.3560679 | 4.971203647 | 3.83E-09    | 21.39442989 |
| COA4         | NM_016565    | 157.9846393 | 22.07281667 | 5.05E-09    | 7.157429959 |
| C5orf51      | NM_175921    | 164.0220179 | 2.255673658 | 9.14E-19    | 72.71531381 |
| REEP3        | NM_001001330 | 76.49011787 | 3.477098498 | 4.00E-07    | 21.99826031 |
| NECAP2       | NM_001145278 | 165.9274965 | 12.86732214 | 7.63E-13    | 12.89526248 |
| ARFGEF1      | NM_006421    | 167.9934465 | 5.776763546 | 5.34E-15    | 29.08089368 |
| WDFY3-AS2    | NR_015359    | 116.2044036 | 1.275615651 | 4.55E-13    | 91.09672139 |
| SRRT         | NM_015908    | 93.40880717 | 19.74472529 | 0.000146585 | 4.730823337 |
| ZFC3H1       | NM_144982    | 168.86595   | 4.965238498 | 1.03E-15    | 34.00963521 |
| REEP4        | NM_025232    | 199.7648751 | 32.06961277 | 8.74E-11    | 6.229101564 |
| KIAA0319L    | NM_024874    | 205.6417822 | 6.389849224 | 1.14E-18    | 32.18257192 |
| KIAA1033     | NM_001293640 | 238.6066572 | 3.113153911 | 4.06E-24    | 76.644671   |
| SH2D3A       | NM_005490    | 135.1890429 | 14.34687763 | 3.59E-09    | 9.422889526 |
| LOC642366    | NR_046243    | 146.0703536 | 5.936664439 | 1.98E-13    | 24.60478525 |
| SRPK1        | NM_003137    | 190.7890429 | 5.185925731 | 1.29E-17    | 36.78977541 |
| RIOK1        | NM_031480    | 153.1407072 | 4.808852614 | 5.60E-15    | 31.84558137 |
| TACC1        | NM_006283    | 159.0176143 | 6.084777342 | 1.64E-14    | 26.13367843 |
| SCRN1        | NM_001145514 | 82.52749646 | 7.059990675 | 4.81E-06    | 11.68946253 |
| ZNF778       | NM_182531    | 263.4682037 | 12.41326908 | 1.28E-22    | 21.22472349 |
| KCTD13       | NM_178863    | 139.320943  | 12.28142202 | 2.60E-10    | 11.34404003 |
| XK           | NM_021083    | 53.85499293 | 2.073903906 | 4.57E-05    | 25.96793071 |
| IFNAR1       | NM_000629    | 128.2791608 | 6.605556786 | 9.97E-11    | 19.41988616 |
| GTF2IRD2     | NM_001281447 | 56.79344649 | 7.677206039 | 0.000680874 | 7.397671262 |
| NKAPP1       | NR_027131    | 93.40880717 | 2.769986807 | 3.58E-10    | 33.72175164 |
| TTC5         | NM_138376    | 47.97808581 | 4.615180761 | 0.000820313 | 10.39571109 |
| BBS5         | NM_152384    | 75.61761433 | 3.183001267 | 2.60E-07    | 23.75670255 |
| NR1D2        | NM_001145425 | 138.1274965 | 4.221429591 | 5.97E-13    | 32.72054963 |
| SYN2         | NM_133625    | 269.1846393 | 4.936979226 | 9.24E-25    | 54.5241588  |
| TBCB         | NM_001281    | 113.26595   | 13.36875252 | 1.58E-07    | 8.472439731 |
| AKIRIN1      | NM_001136275 | 172.8373786 | 11.62049614 | 7.32E-14    | 14.87349391 |
| NINL         | NM_025176    | 108.4220179 | 6.14575305  | 3.62E-09    | 17.64177913 |
| FAM84B       | NM_174911    | 231.6967751 | 13.94114488 | 3.30E-19    | 16.61963756 |
| COMMD10      | NM_016144    | 191.9824894 | 2.560654863 | 1.17E-18    | 74.97398115 |
| SYNM         | NM_145728    | 156.0791608 | 5.458129152 | 4.76E-14    | 28.5957251  |
| L3MBTL3      | NM_001007102 | 82.52749646 | 3.073114861 | 1.08E-07    | 26.85467358 |
| MB21D2       | NM_178496    | 123.2747572 | 5.193375401 | 1.31E-10    | 23.736924   |
| LONP2        | NM_001300948 | 78.55606789 | 5.347598479 | 3.33E-06    | 14.68997125 |
| METTL5       | NM_001293187 | 233.6022537 | 8.628028913 | 8.76E-22    | 27.07481118 |
| SLC39A11     | NM_001159770 | 137.2549929 | 9.047307491 | 7.60E-11    | 15.1708111  |
| MORN2        | NM_001145450 | 54.88796794 | 2.735350595 | 3.92E-05    | 20.06615461 |
| VPS39        | NM_001301138 | 172.9978501 | 6.858530358 | 4.15E-15    | 25.22374926 |
| TFG          | NM_001195478 | 176.9692786 | 4.803799366 | 4.53E-17    | 36.83944003 |
| COPS6        | NM_006833    | 170.9319    | 34.96248135 | 6.90E-08    | 4.889009403 |
| GTF2E2       | NM_002095    | 123.2747572 | 4.130910182 | 7.88E-11    | 29.84203281 |
| NPHP1        | NM_001128179 | 104.2901179 | 1.356285553 | 1.03E-10    | 76.8939237  |
| ATG16L2      | NM_033388    | 240.5121358 | 25.42937451 | 1.70E-15    | 9.458043717 |
| AHSA1        | NM_012111    | 233.6022537 | 11.75106797 | 1.94E-20    | 19.87923602 |
| GPHN         | NM_020806    | 91.50332862 | 2.479655407 | 2.23E-08    | 36.90163091 |
| TRMT12       | NM_017956    | 157.1121358 | 22.72965858 | 1.08E-08    | 6.912208349 |

|              |              |             |             |             |             |
|--------------|--------------|-------------|-------------|-------------|-------------|
| CTC-436P18.1 | NR_109908    | 199.7648751 | 7.689446375 | 2.44E-17    | 25.97909723 |
| RRP7A        | NM_015703    | 137.2549929 | 27.29522083 | 1.20E-06    | 5.028535719 |
| SQSTM1       | NM_003900    | 217.8770108 | 25.41326622 | 6.89E-14    | 8.573357277 |
| VCP          | NM_007126    | 188.8835644 | 22.31125494 | 5.13E-12    | 8.465842232 |
| RUVBL2       | NM_006666    | 110.3274965 | 15.96187425 | 7.28E-07    | 6.911938708 |
| LOC100131564 | NR_034089    | 190.9495144 | 5.345273794 | 1.31E-17    | 35.72305587 |
| PRKAA2       | NM_006252    | 43.84618576 | 3.396474312 | 0.000910273 | 12.90932353 |
| GATAD1       | NM_021167    | 218.4285714 | 7.615724135 | 3.27E-20    | 28.68126098 |
| FOXO3        | NM_001455    | 94.44178218 | 5.691762307 | 8.14E-08    | 16.59271366 |
| SMEK1        | NM_001284280 | 205.6417822 | 6.052616338 | 2.12E-18    | 33.97568435 |
| METTL1       | NM_005371    | 165.0549929 | 16.17250925 | 2.62E-11    | 10.20589881 |
| RARS2        | NM_020320    | 138.2879679 | 4.183578498 | 2.63E-12    | 33.05494757 |
| EIF4A2       | NM_001967    | 299.0505893 | 44.75204956 | 4.48E-16    | 6.682388679 |
| TRMT13       | NM_019083    | 114.298925  | 1.865212454 | 1.58E-13    | 61.27930616 |
| UBA5         | NM_024818    | 304.9274965 | 2.121428351 | 3.95E-39    | 143.736882  |
| PEX3         | NM_003630    | 173.8703536 | 2.733824497 | 7.51E-19    | 63.5996765  |
| ENPP1        | NM_006208    | 46.78463932 | 3.3143916   | 0.000498787 | 14.115604   |
| RAD51AP2     | NM_001099218 | 129.1516643 | 2.679888003 | 1.71E-14    | 48.1929335  |
| FAM120C      | NM_017848    | 89.4373786  | 3.109196139 | 2.74E-08    | 28.76543473 |
| TSEN2        | NM_001145395 | 102.5451108 | 6.00323947  | 7.06E-09    | 17.08162923 |
| CMTR1        | NM_015050    | 130.1846393 | 8.367173987 | 1.02E-10    | 15.55897362 |
| LYAR         | NM_001145725 | 154.0132108 | 8.432924341 | 9.85E-13    | 18.26332178 |
| LOC101928222 | NR_110235    | 149.0088072 | 6.992966665 | 6.62E-13    | 21.30838231 |
| FAM72B       | NM_001100910 | 73.71213579 | 4.543674153 | 1.64E-06    | 16.22302421 |
| SEMA6A       | NM_001300780 | 133.1230929 | 4.665111014 | 9.87E-12    | 28.5358896  |
| SMEK2        | NM_001122964 | 108.4220179 | 3.813010789 | 1.81E-09    | 28.43475246 |
| TTF1         | NM_007344    | 62.67035361 | 5.778582678 | 5.14E-05    | 10.84528112 |
| CCDC22       | NM_014008    | 128.1186893 | 5.381922197 | 8.59E-12    | 23.80537745 |
| CMBL         | NM_138809    | 100.3186893 | 8.316789993 | 8.05E-08    | 12.06218858 |
| CPT2         | NM_000098    | 100.4791608 | 16.48309743 | 6.36E-06    | 6.095890727 |
| NPLOC4       | NM_017921    | 90.47035361 | 15.88139578 | 5.09E-05    | 5.696624834 |
| ARPC1A       | NM_006409    | 165.9274965 | 6.534704425 | 1.84E-14    | 25.39173705 |
| ENTPD7       | NM_020354    | 185.9451108 | 8.053272559 | 4.21E-16    | 23.08938502 |
| PPP2R5D      | NM_001270476 | 177.8417822 | 14.55063154 | 7.84E-13    | 12.22227239 |
| ZNF212       | NM_012256    | 119.4638001 | 8.174030336 | 1.69E-09    | 14.61504242 |
| UQCRC1       | NM_003365    | 182.8461858 | 16.13035699 | 6.37E-13    | 11.33553249 |
| VWDE         | NM_001135924 | 126.3736822 | 2.181811257 | 1.21E-12    | 57.92145486 |
| KIF5A        | NM_004984    | 152.1077322 | 5.954950644 | 3.43E-13    | 25.54307186 |
| KIF20B       | NM_001284259 | 155.2066572 | 2.62461853  | 1.21E-15    | 59.13493922 |
| SOAT1        | NM_003101    | 183.8791608 | 4.723079625 | 4.24E-17    | 38.9320476  |
| SCRN3        | NM_001193528 | 139.1604715 | 2.332957907 | 2.96E-15    | 59.64979953 |
| CRAT         | NM_001257363 | 118.4308251 | 11.09024827 | 2.71E-08    | 10.67882542 |
| LRBA         | NM_006726    | 263.1472607 | 3.476112247 | 6.15E-25    | 75.70160053 |
| MINPP1       | NM_004897    | 107.5495144 | 6.148217182 | 2.01E-09    | 17.49279689 |
| ECSIT        | NM_001142464 | 97.54070721 | 11.45432229 | 7.67E-07    | 8.515624474 |
| LRRC42       | NM_052940    | 85.46595002 | 5.328872021 | 1.68E-07    | 16.03828159 |
| HMGN1        | NM_004965    | 44.7186893  | 3.646609528 | 0.000637753 | 12.26308684 |
| PFAS         | NM_012393    | 74.7451108  | 7.673290052 | 1.79E-05    | 9.74094688  |
| TNFRSF18     | NM_004195    | 75.61761433 | 17.77798824 | 0.001658095 | 4.253440451 |
| BAG3         | NM_004281    | 260.3692786 | 13.24931496 | 3.90E-21    | 19.6515276  |
| CTTNBP2      | NM_033427    | 71.64618576 | 4.09602187  | 1.77E-06    | 17.49165118 |
| PARD6A       | NM_016948    | 58.69892504 | 12.42989711 | 0.004046095 | 4.722398305 |
| ENO4         | NM_001242699 | 125.3407072 | 15.44664208 | 5.16E-08    | 8.114430732 |
| CBY1         | NM_015373    | 127.2461858 | 11.8047682  | 2.53E-09    | 10.77921934 |
| GMPPA        | NM_013335    | 166.0879679 | 16.75445814 | 1.65E-11    | 9.91306114  |
| ZNF274       | NM_016324    | 84.43297501 | 5.750537264 | 2.61E-07    | 14.68262375 |
| GLTP         | NM_016433    | 76.49011787 | 10.62273227 | 5.41E-05    | 7.200606766 |
| VPS13A       | NM_001018038 | 160.9230929 | 2.558023021 | 1.86E-15    | 62.90916522 |
| C4orf3       | NM_001001701 | 113.26595   | 25.96824138 | 2.50E-05    | 4.361710459 |
| MMS22L       | NM_198468    | 119.3033286 | 3.206928993 | 1.99E-11    | 37.20173689 |
| CHD1L        | NM_001256338 | 133.2835644 | 4.176588512 | 3.02E-12    | 31.91206507 |
| C5orf45      | NM_001017987 | 224.786893  | 17.09413961 | 7.03E-17    | 13.14993899 |

|            |              |             |             |             |             |
|------------|--------------|-------------|-------------|-------------|-------------|
| SMCHD1     | NM_015295    | 113.26595   | 4.325718153 | 9.17E-10    | 26.18431114 |
| BCAT2      | NM_001190    | 179.9077322 | 13.62101718 | 1.07E-13    | 13.20809818 |
| PSMD11     | NM_002815    | 223.5934465 | 10.48260898 | 6.26E-19    | 21.32994246 |
| TBC1D22B   | NM_017772    | 176.8088072 | 5.050801191 | 2.65E-16    | 35.00609121 |
| DGCR6L     | NM_033257    | 172.8373786 | 18.8084036  | 3.15E-11    | 9.189369936 |
| SLC35E2    | NM_182838    | 168.153918  | 19.28582401 | 8.12E-11    | 8.719042438 |
| RAB11FIP2  | NM_014904    | 81.49452145 | 3.849102663 | 4.74E-07    | 21.17234291 |
| GAK        | NM_005255    | 163.1495144 | 8.061981075 | 1.43E-13    | 20.23690119 |
| GATA6      | NM_005257    | 139.1604715 | 7.175202911 | 7.06E-12    | 19.39463918 |
| NDUFA10    | NM_004544    | 57.66595002 | 9.437947413 | 0.000927846 | 6.110009677 |
| SP100      | NM_001080391 | 98.41321075 | 3.068146043 | 3.89E-09    | 32.07579085 |
| USP4       | NM_001251877 | 180.9407072 | 7.553530416 | 3.35E-16    | 23.95445537 |
| RWDD1      | NM_015952    | 179.0352287 | 2.508320341 | 4.83E-20    | 71.3765406  |
| TRA2A      | NM_001282758 | 285.2308251 | 10.63186783 | 4.56E-25    | 26.827913   |
| LDLR       | NM_001195799 | 135.1890429 | 15.68034876 | 1.09E-08    | 8.621558421 |
| LAP3       | NM_015907    | 132.2505893 | 10.41921702 | 4.86E-10    | 12.69294891 |
| RAP1GDS1   | NM_001100429 | 135.0285714 | 1.533576912 | 3.79E-13    | 88.04812488 |
| TBC1D8     | NM_001102426 | 144.0044036 | 9.690144055 | 1.12E-10    | 14.86091463 |
| SLC25A20   | NM_000387    | 55.92094295 | 7.417357666 | 0.000835407 | 7.539200005 |
| DNAL1      | NM_001201366 | 115.4923715 | 3.626407635 | 3.52E-11    | 31.84759772 |
| ZFAS1      | NR_036659    | 257.4308251 | 53.80466212 | 1.50E-11    | 4.784544962 |
| MAPK1IP1L  | NM_144578    | 231.5363036 | 9.849641485 | 3.20E-20    | 23.50707932 |
| GTF2IRD1P1 | NR_003934    | 213.9055823 | 9.672635034 | 2.76E-18    | 22.1145098  |
| DPF2       | NM_006268    | 151.0747572 | 12.01013658 | 1.75E-11    | 12.57893748 |
| RIMKLA     | NM_173642    | 68.54726073 | 9.284051966 | 8.85E-05    | 7.383334451 |
| SLC38A10   | NM_001037984 | 309.0593965 | 17.65947143 | 8.09E-24    | 17.5010559  |
| LYRM1      | NM_001128301 | 149.3297501 | 11.95703784 | 4.97E-11    | 12.4888582  |
| LARP6      | NM_197958    | 78.55606789 | 14.46085507 | 0.000608928 | 5.432325234 |
| SNX19      | NM_014758    | 154.8857143 | 9.306181333 | 3.60E-12    | 16.64331574 |
| WDR87      | NM_031951    | 81.49452145 | 4.611785893 | 2.84E-07    | 17.67092474 |
| ZNF511     | NM_145806    | 58.69892504 | 7.516946521 | 0.000331444 | 7.808878894 |
| ARID4A     | NM_023001    | 114.4593965 | 2.742026941 | 3.35E-11    | 41.74262287 |
| TTC17      | NM_018259    | 191.8220179 | 4.514645732 | 2.08E-17    | 42.48883065 |
| PYCR1      | NM_001282281 | 160.0505893 | 31.7959964  | 9.46E-08    | 5.033671136 |
| MYBL1      | NM_001080416 | 221.6879679 | 2.684677497 | 3.36E-24    | 82.57526955 |
| RBM25      | NM_021239    | 212.5516643 | 6.425870198 | 9.94E-19    | 33.0774911  |
| SLC27A6    | NM_014031    | 92.53630363 | 1.960746826 | 5.68E-09    | 47.19441714 |
| LINC00659  | NR_046224    | 189.7560679 | 36.71840663 | 7.78E-09    | 5.167873155 |
| SPATA5     | NM_145207    | 64.73630363 | 2.403964249 | 6.78E-06    | 26.92897935 |
| BBS2       | NM_031885    | 204.7692786 | 5.53721262  | 4.16E-19    | 36.98056995 |
| CHMP4C     | NM_152284    | 251.553918  | 4.737073955 | 1.99E-25    | 53.10322794 |
| PPP2R2A    | NM_002717    | 55.6        | 5.603854925 | 0.000417132 | 9.921741505 |
| MSMO1      | NM_001017369 | 183.8791608 | 5.516703849 | 3.19E-18    | 33.33134528 |
| CEP164     | NM_014956    | 151.0747572 | 9.826569753 | 1.44E-11    | 15.37410928 |
| ART5       | NM_001297668 | 76.49011787 | 13.79840531 | 0.000337758 | 5.543402744 |
| MTFP1      | NM_016498    | 108.2615464 | 22.99734392 | 4.16E-05    | 4.707567396 |
| DRAM2      | NM_178454    | 130.3451108 | 6.498295181 | 2.23E-11    | 20.05835487 |
| RAB11A     | NM_004663    | 166.0879679 | 5.902225942 | 2.58E-15    | 28.13988647 |
| LOC284930  | NR_122046    | 58.69892504 | 2.642528165 | 2.30E-05    | 22.21316912 |
| N4BP2L2    | NM_033111    | 86.49892504 | 5.700130098 | 5.14E-07    | 15.17490365 |
| TRIM68     | NM_018073    | 182.8461858 | 9.664409706 | 1.94E-15    | 18.91953997 |
| TM9SF4     | NM_014742    | 94.60225365 | 10.78936126 | 2.11E-06    | 8.768105119 |
| HOGA1      | NM_138413    | 96.5077322  | 9.996809982 | 8.04E-07    | 9.653852816 |
| FNBP1L     | NM_017737    | 105.4835644 | 3.437580299 | 4.89E-10    | 30.68541101 |
| SLC35B4    | NM_032826    | 60.76487506 | 6.418285708 | 9.64E-05    | 9.467461847 |
| PPAP2B     | NM_003713    | 71.64618576 | 6.801479086 | 1.14E-05    | 10.53391253 |
| PFKFB4     | NM_004567    | 109.4549929 | 9.005984985 | 1.53E-08    | 12.15358377 |
| PRMT5-AS1  | NR_120600    | 83.56047148 | 19.37238227 | 0.001039316 | 4.313381303 |
| LIN52      | NM_001024674 | 83.72094295 | 3.376821539 | 1.09E-07    | 24.79282425 |
| SEC24A     | NM_001252231 | 156.0791608 | 4.925072085 | 1.07E-14    | 31.69073631 |
| PTPN14     | NM_005401    | 157.9846393 | 5.303269059 | 8.13E-14    | 29.79004791 |
| WDR24      | NM_032259    | 188.8835644 | 21.22513228 | 2.92E-12    | 8.899052401 |

|                |              |             |             |             |             |
|----------------|--------------|-------------|-------------|-------------|-------------|
| MRPS33         | NM_016071    | 89.59785007 | 4.964467839 | 7.30E-08    | 18.04782566 |
| SETD7          | NM_030648    | 151.2352287 | 5.648689374 | 7.24E-14    | 26.77350774 |
| ZSCAN9         | NM_006299    | 123.4352287 | 6.721178054 | 6.92E-11    | 18.36511809 |
| ZNF845         | NM_138374    | 47.81761433 | 2.69614486  | 0.000129736 | 17.73555088 |
| ZNF197         | NM_006991    | 166.9604715 | 6.5746932   | 2.58E-15    | 25.39441254 |
| TEX9           | NM_001286449 | 123.4352287 | 1.738943825 | 1.93E-12    | 70.982873   |
| PPP2R5B        | NM_006244    | 89.59785007 | 14.265633   | 3.57E-05    | 6.280678191 |
| LMAN2L         | NR_024519    | 111.3604715 | 7.609999495 | 6.14E-09    | 14.63344006 |
| TFCP2          | NM_005653    | 108.4220179 | 4.608850696 | 2.37E-09    | 23.52474078 |
| IMMP1L         | NM_144981    | 85.6264215  | 2.414546767 | 3.43E-08    | 35.46273059 |
| IRF5           | NM_001242452 | 112.3934465 | 19.12166238 | 5.41E-06    | 5.877807287 |
| THOC2          | NM_001081550 | 82.52749646 | 2.295701377 | 9.67E-08    | 35.94870713 |
| PVRL3          | NM_015480    | 41.78023574 | 2.723641939 | 0.000859148 | 15.33984153 |
| SERINC1        | NM_020755    | 177.8417822 | 3.316272272 | 2.46E-18    | 53.62701479 |
| CHMP4B         | NM_176812    | 82.52749646 | 9.139587607 | 4.45E-06    | 9.029673987 |
| UBE2T          | NM_014176    | 176.9692786 | 12.03058139 | 3.06E-14    | 14.70995232 |
| GLTSCR1        | NM_015711    | 118.2703536 | 7.894580187 | 3.62E-09    | 14.98120873 |
| ARMCX6         | NM_001009584 | 53.69452145 | 8.977058682 | 0.002797541 | 5.981304496 |
| C5orf56        | NR_045116    | 57.8264215  | 7.614711271 | 0.000901351 | 7.594039937 |
| GNAI3          | NM_006496    | 199.7648751 | 5.221291106 | 3.49E-19    | 38.25967007 |
| ZNF45          | NM_003425    | 98.57368223 | 5.050092169 | 4.61E-09    | 19.51918479 |
| ZNF799         | NM_001080821 | 157.9846393 | 4.377067224 | 2.54E-16    | 36.09372012 |
| RHOB           | NM_004040    | 237.5736822 | 25.58161368 | 1.39E-14    | 9.286891953 |
| ZNF8           | NM_021089    | 103.5780858 | 10.47292444 | 1.49E-07    | 9.890082413 |
| SMIM20         | NM_001145432 | 169.898925  | 7.745180719 | 6.74E-15    | 21.93608273 |
| MRC2           | NM_006039    | 74.7451108  | 8.877428147 | 2.99E-05    | 8.419680741 |
| LOC414300      | NR_121211    | 165.0549929 | 4.568185361 | 7.49E-18    | 36.13141322 |
| CACYBP         | NM_014412    | 80.62201792 | 15.50268622 | 0.000240952 | 5.200519236 |
| RBBP4          | NM_001135255 | 160.0505893 | 11.51014845 | 6.37E-12    | 13.9051716  |
| TERF2IP        | NM_018975    | 214.6176143 | 11.21210708 | 1.01E-18    | 19.14159513 |
| SURF2          | NM_017503    | 162.9890429 | 39.07588314 | 1.15E-06    | 4.171090447 |
| NDUFB6         | NM_182739    | 145.0373786 | 7.572528325 | 4.41E-12    | 19.1530982  |
| SETD3          | NM_199123    | 53.69452145 | 7.153306007 | 0.001570701 | 7.506252549 |
| LOC100506639   | NR_102752    | 89.59785007 | 6.152820943 | 7.24E-07    | 14.56207663 |
| SNX16          | NM_152836    | 131.2176143 | 5.283744324 | 6.19E-12    | 24.83420966 |
| SLC25A30       | NM_001286807 | 157.1121358 | 7.985927885 | 5.73E-13    | 19.67362316 |
| GGNBP2         | NM_024835    | 232.4088072 | 10.1943461  | 1.21E-19    | 22.7978141  |
| SNHG21         | NR_110097    | 203.7363036 | 8.676746152 | 2.17E-18    | 23.48072654 |
| SCOC           | NM_001153484 | 100.4791608 | 6.339541547 | 6.72E-09    | 15.84959418 |
| BCL2L2         | NM_001199839 | 118.2703536 | 15.21655447 | 2.59E-07    | 7.772479234 |
| ATP6V1A        | NM_001690    | 179.9077322 | 3.35249359  | 3.47E-17    | 53.66385568 |
| ITPR3          | NM_002224    | 105.3230929 | 12.33467088 | 2.26E-07    | 8.538784204 |
| BRD8           | NM_006696    | 161.9560679 | 10.23150145 | 1.85E-13    | 15.82915946 |
| WASH2P         | NR_024077    | 105.6440358 | 10.48120619 | 6.91E-08    | 10.07937769 |
| DCTN3          | NM_001281426 | 135.1890429 | 17.97732073 | 1.81E-08    | 7.519977248 |
| HINT1          | NM_005340    | 178.8747572 | 7.201043626 | 4.68E-17    | 24.84011575 |
| FYTTD1         | NM_001011537 | 104.2901179 | 7.760423211 | 2.34E-08    | 13.43871526 |
| RABEP2         | NM_024816    | 57.66595002 | 9.99154977  | 0.002355211 | 5.771472029 |
| SPRYD7         | NM_001127482 | 67.83522867 | 8.350978568 | 6.92E-05    | 8.123027513 |
| E2F4           | NM_001950    | 93.56927864 | 21.60728834 | 0.000239299 | 4.330449853 |
| C7orf55-LUC7L2 | NM_001244584 | 57.8264215  | 8.831042134 | 0.000938405 | 6.548085789 |
| PHB            | NM_001281496 | 208.7407072 | 12.80537473 | 1.04E-16    | 16.30102293 |
| VAPA           | NM_194434    | 178.8747572 | 3.872218099 | 1.80E-17    | 46.19439108 |
| WAPAL          | NM_015045    | 132.2505893 | 6.28438719  | 1.72E-11    | 21.04430955 |
| LDB1           | NM_001113407 | 127.2461858 | 25.62696174 | 2.27E-06    | 4.965324686 |
| NAPEPLD        | NM_198990    | 140.1934465 | 6.682927993 | 1.17E-11    | 20.97784783 |
| VRK3           | NM_016440    | 68.86820368 | 10.5408193  | 0.000330009 | 6.533477305 |
| LOC100507501   | NR_039999    | 267.2791608 | 19.33579566 | 3.78E-20    | 13.82302365 |
| RHOA           | NM_001664    | 101.3516643 | 8.688088879 | 1.19E-07    | 11.66558788 |
| POLR2D         | NM_004805    | 200.7978501 | 11.81089755 | 1.67E-16    | 17.0010661  |
| NDFIP2         | NM_001161407 | 167.9934465 | 3.48481151  | 6.90E-17    | 48.20732656 |
| POLR2M         | NM_001018102 | 58.14736445 | 8.432621131 | 0.001711527 | 6.895526734 |



|                |              |             |             |             |             |
|----------------|--------------|-------------|-------------|-------------|-------------|
| NEURL1B        | NM_001142651 | 52.82201792 | 7.551116667 | 0.002626065 | 6.995259144 |
| HERC1          | NM_003922    | 106.3560679 | 4.022297167 | 7.73E-10    | 26.44162365 |
| VGLL4          | NM_001284390 | 105.6440358 | 7.773384257 | 4.90E-08    | 13.59048161 |
| ZNF335         | NM_022095    | 127.2461858 | 18.38329881 | 9.59E-08    | 6.921836342 |
| PCYT1A         | NM_005017    | 164.8945215 | 6.277614695 | 2.56E-14    | 26.26706631 |
| MYBBP1A        | NM_014520    | 103.4176143 | 7.619033874 | 1.77E-08    | 13.57358637 |
| RP9P           | NR_003500    | 51.7890429  | 5.371656303 | 0.000576412 | 9.641168382 |
| EID2           | NM_153232    | 160.0505893 | 18.27119275 | 3.11E-09    | 8.759723109 |
| PARG           | NM_003631    | 124.3077322 | 1.787343417 | 6.53E-12    | 69.54887963 |
| PTGES          | NM_004878    | 150.2022537 | 11.88944752 | 9.65E-12    | 12.63324081 |
| TMEM214        | NM_001083590 | 221.5274965 | 11.82794907 | 4.75E-19    | 18.72915543 |
| VCPKMT         | NM_024558    | 109.2945215 | 7.130835838 | 3.88E-09    | 15.32702813 |
| LZTR1          | NM_006767    | 136.3824894 | 21.34325076 | 5.07E-08    | 6.389958631 |
| DLG1           | NM_004087    | 223.5934465 | 3.336948072 | 1.62E-21    | 67.00537186 |
| LRIG3          | NM_153377    | 82.68796794 | 3.837013996 | 5.37E-07    | 21.55008244 |
| ITGAX          | NM_001286375 | 47.65714286 | 7.175959809 | 0.004099079 | 6.641222098 |
| ESRRA          | NM_001282450 | 174.9033286 | 25.79837675 | 7.00E-10    | 6.779625334 |
| RBM18          | NR_027125    | 162.9890429 | 6.935718587 | 1.30E-14    | 23.49995042 |
| TMEM52         | NM_178545    | 176.9692786 | 20.41382537 | 2.20E-10    | 8.669089476 |
| ZNF333         | NM_032433    | 127.2461858 | 8.65723438  | 7.48E-10    | 14.69824891 |
| PSAP           | NM_002778    | 288.0088072 | 9.866845127 | 5.85E-26    | 29.18955385 |
| ETFB           | NM_001985    | 116.2044036 | 9.507405237 | 6.84E-09    | 12.22251505 |
| DPH6           | NM_001141972 | 185.9451108 | 3.741009981 | 2.63E-19    | 49.70452144 |
| SEPSECS-AS1    | NR_037934    | 141.2264215 | 4.267906289 | 3.72E-13    | 33.09032859 |
| HNRNPF         | NM_001098207 | 80.62201792 | 17.19179801 | 0.000648503 | 4.689562889 |
| ACER2          | NM_001010887 | 176.8088072 | 6.031137423 | 1.19E-15    | 29.3159971  |
| TESK2          | NM_007170    | 125.3407072 | 5.324491948 | 7.83E-11    | 23.54040694 |
| ZNF204P        | NR_024553    | 55.76047148 | 4.992201725 | 0.000123655 | 11.16951489 |
| NEDD9          | NM_182966    | 82.52749646 | 4.283321925 | 4.11E-07    | 19.26717111 |
| TBC1D2         | NM_001267571 | 76.65058935 | 7.856570557 | 1.54E-05    | 9.75624018  |
| TSTD1          | NM_001113205 | 204.7692786 | 42.49492402 | 6.27E-08    | 4.818676192 |
| SAMD13         | NM_001010971 | 61.79785007 | 7.097574158 | 0.000277609 | 8.706897413 |
| CHKB-CPT1B     | NR_027928    | 135.1890429 | 19.6376043  | 6.91E-08    | 6.884192228 |
| RPP38          | NM_006414    | 247.4220179 | 30.88651676 | 6.90E-15    | 8.010680512 |
| LIPE-AS1       | NR_073180    | 219.6220179 | 6.707561035 | 9.93E-20    | 32.74245538 |
| NDUFA4         | NM_002489    | 206.8352287 | 7.587894741 | 2.74E-19    | 27.25857906 |
| UGDH           | NM_001184701 | 200.7978501 | 4.909501787 | 4.17E-19    | 40.89984254 |
| TVP23C-CDRT4   | NM_001204478 | 177.8417822 | 6.626227417 | 7.79E-16    | 26.8390701  |
| LOC653160      | NR_037869    | 46.78463932 | 4.920894491 | 0.001192953 | 9.50734453  |
| LOC100996579   | NR_110164    | 95.47475719 | 6.710417639 | 1.16E-07    | 14.22784129 |
| LOC101927151   | NR_110689    | 145.1978501 | 9.313793848 | 1.52E-11    | 15.58954948 |
| ASUN           | NM_018164    | 78.55606789 | 5.643081497 | 2.04E-06    | 13.92077501 |
| MRPS36         | NM_033281    | 131.2176143 | 8.431843771 | 5.85E-11    | 15.56214962 |
| COMMD4         | NR_104313    | 140.1934465 | 16.88041547 | 3.38E-09    | 8.305094547 |
| LOC101926911   | NR_110104    | 95.47475719 | 5.06972866  | 1.57E-08    | 18.83232094 |
| POLR1C         | NM_203290    | 183.8791608 | 30.10908347 | 1.63E-09    | 6.10709924  |
| KLHDC1         | NM_172193    | 72.67916077 | 1.936154327 | 7.63E-07    | 37.53789652 |
| TPP1           | NM_000391    | 129.3121358 | 13.63040174 | 8.29E-09    | 9.487037743 |
| DLEU1          | NR_109974    | 93.40880717 | 4.54741176  | 9.95E-08    | 20.54109285 |
| RAB18          | NM_001256412 | 85.6264215  | 4.721536063 | 2.67E-07    | 18.1352891  |
| ZNF225         | NM_013362    | 47.81761433 | 2.42092413  | 0.000111831 | 19.75180211 |
| TUBGCP4        | NM_014444    | 292.1407072 | 8.736169386 | 1.82E-26    | 33.44036663 |
| EDC4           | NM_014329    | 215.6505893 | 12.68103996 | 3.13E-17    | 17.00574953 |
| PSME3          | NM_005789    | 179.9077322 | 17.08921575 | 1.47E-12    | 10.5275593  |
| SNRNP40        | NM_004814    | 204.6088072 | 9.504153051 | 2.33E-17    | 21.52835777 |
| ABCG2          | NM_004827    | 57.66595002 | 3.605193013 | 3.61E-05    | 15.99524625 |
| PMAIP1         | NM_021127    | 284.0373786 | 16.24398297 | 2.38E-23    | 17.48569788 |
| LOC100507642   | NR_108065    | 66.64178218 | 9.292136508 | 0.000168194 | 7.17184709  |
| SNAPC1         | NM_003082    | 255.3648751 | 5.342439121 | 9.35E-25    | 47.79930464 |
| HSPD1          | NM_002156    | 269.1846393 | 20.18389843 | 3.65E-20    | 13.33660295 |
| ZNF816-ZNF321P | NM_001202473 | 66.64178218 | 7.052664806 | 0.000139124 | 9.449163403 |
| OMA1           | NM_145243    | 62.67035361 | 2.226175475 | 7.47E-06    | 28.15157849 |

|               |              |             |             |             |             |
|---------------|--------------|-------------|-------------|-------------|-------------|
| C10orf32      | NM_001136200 | 127.4066572 | 7.152546238 | 4.86E-11    | 17.81276947 |
| DCK           | NM_000788    | 217.5560679 | 3.291626241 | 1.58E-22    | 66.09379436 |
| PTGES2-AS1    | NR_024425    | 196.66595   | 15.35694395 | 6.54E-14    | 12.80632075 |
| HMGCL         | NM_000191    | 173.8703536 | 12.72921516 | 1.55E-13    | 13.65915741 |
| PIM2          | NM_006875    | 119.3033286 | 16.31508404 | 2.51E-07    | 7.31245566  |
| RAB2A         | NM_001242644 | 175.7758322 | 4.2464999   | 3.60E-16    | 41.39310875 |
| RALBP1        | NM_006788    | 52.66154644 | 4.137888357 | 0.000686415 | 12.72667165 |
| SYTL1         | NM_001193308 | 116.3648751 | 23.85120558 | 6.15E-06    | 4.878783785 |
| AVL9          | NM_015060    | 190.7890429 | 4.567119537 | 1.02E-17    | 41.77447981 |
| VPS33B        | NM_001289149 | 91.50332862 | 13.79534627 | 1.12E-05    | 6.632912785 |
| STK17A        | NM_004760    | 180.7802357 | 6.754555043 | 8.17E-16    | 26.7641961  |
| NABP1         | NM_001254736 | 281.098925  | 10.39267294 | 1.07E-25    | 27.04779864 |
| LUC7L         | NM_018032    | 188.7230929 | 6.230197178 | 6.60E-17    | 30.29167256 |
| TRPC4AP       | NM_015638    | 171.9648751 | 6.109488873 | 1.81E-15    | 28.1471787  |
| GSS           | NM_000178    | 207.7077322 | 9.361144147 | 4.61E-18    | 22.18828478 |
| DZIP3         | NM_014648    | 170.9319    | 3.780875754 | 1.12E-15    | 45.20960517 |
| ALKBH2        | NM_001001655 | 108.4220179 | 15.1081868  | 6.68E-07    | 7.176375257 |
| C8orf59       | NM_001293320 | 123.4352287 | 13.24379603 | 2.62E-08    | 9.320230273 |
| CYP39A1       | NM_001278739 | 51.94951438 | 2.220116562 | 0.000131254 | 23.39945356 |
| STX17-AS1     | NR_038853    | 45.75166431 | 3.503083727 | 0.000307565 | 13.06039703 |
| PIGU          | NM_080476    | 120.1758322 | 5.864596651 | 2.62E-10    | 20.49174723 |
| KIAA0020      | NM_014878    | 134.1560679 | 4.293699344 | 1.82E-12    | 31.24486769 |
| COPB1         | NM_001144062 | 174.0308251 | 3.731983561 | 5.10E-17    | 46.63225929 |
| MOCOS         | NM_017947    | 192.6945215 | 4.521381819 | 8.28E-18    | 42.6185023  |
| PNRC1         | NM_006813    | 253.298925  | 33.13367052 | 9.87E-15    | 7.644758973 |
| UBA1          | NM_003334    | 107.2285714 | 12.38435487 | 2.77E-07    | 8.658389761 |
| NCDN          | NM_014284    | 211.6791608 | 15.77223126 | 2.91E-16    | 13.42100286 |
| MTA2          | NM_004739    | 162.9890429 | 15.2643423  | 6.69E-12    | 10.67776388 |
| NDST2         | NM_003635    | 224.6264215 | 18.0894386  | 1.35E-16    | 12.4175452  |
| HNRNPA1L2     | NM_001011724 | 179.9077322 | 6.562792668 | 1.68E-16    | 27.41328902 |
| YIPF6         | NM_001195214 | 167.832975  | 3.733191431 | 1.65E-16    | 44.95696996 |
| OPA3          | NM_001017989 | 141.06595   | 9.072926504 | 1.89E-11    | 15.54800978 |
| LGALS1        | NM_002305    | 297.1451108 | 44.41323927 | 7.58E-16    | 6.690462476 |
| RBM43         | NM_198557    | 69.74070721 | 6.347667699 | 3.89E-05    | 10.9868239  |
| DIP2A         | NM_001146116 | 76.49011787 | 5.933025475 | 3.42E-06    | 12.89226183 |
| NDUFC2-KCTD14 | NM_001203261 | 122.2417822 | 11.11256138 | 5.76E-09    | 11.00032458 |
| FLJ38576      | NR_046264    | 157.1121358 | 15.52546056 | 1.01E-10    | 10.11964413 |
| GPR19         | NM_006143    | 81.65499293 | 4.318645889 | 4.49E-07    | 18.90754533 |
| DUS2          | NM_001271763 | 120.3363036 | 8.956122955 | 1.57E-09    | 13.43620496 |
| NIPSNAP3A     | NM_015469    | 133.1230929 | 7.27506132  | 1.80E-11    | 18.29855269 |
| NOP9          | NM_174913    | 97.54070721 | 10.94579837 | 1.08E-06    | 8.911246482 |
| NCK1          | NM_006153    | 255.3648751 | 4.245480261 | 2.44E-24    | 60.14982036 |
| TMED10        | NM_006827    | 119.4638001 | 6.840318241 | 1.05E-09    | 17.46465528 |
| PTDSS1        | NM_014754    | 385.5495144 | 11.73179725 | 3.29E-33    | 32.86363598 |
| DGCR2         | NR_033674    | 166.9604715 | 8.939788617 | 8.52E-14    | 18.67610954 |
| ERRFI1        | NM_018948    | 119.4638001 | 10.83487744 | 1.19E-08    | 11.02585616 |
| BUB1          | NM_004336    | 127.2461858 | 4.939914558 | 1.01E-11    | 25.75878272 |
| DNAJC27       | NM_016544    | 121.3692786 | 7.442925552 | 6.61E-10    | 16.30666299 |
| GOLPH3        | NM_022130    | 176.9692786 | 6.659168643 | 2.00E-15    | 26.57528111 |
| RBM34         | NM_015014    | 245.5165394 | 6.435215685 | 1.27E-23    | 38.15202961 |
| GTF2H5        | NM_207118    | 326.8505893 | 6.167985477 | 5.44E-33    | 52.99146546 |
| DNAJC16       | NM_015291    | 76.81106082 | 8.97892959  | 1.50E-05    | 8.554589949 |
| CCRN4L        | NM_012118    | 157.1121358 | 9.853549623 | 1.30E-12    | 15.94472467 |
| FZD3          | NM_017412    | 149.0088072 | 2.473400345 | 5.52E-15    | 60.24451621 |
| PGD           | NM_002631    | 161.0835644 | 12.2964935  | 3.09E-12    | 13.0999593  |
| ALDH18A1      | NM_001017423 | 72.67916077 | 6.248532254 | 9.70E-06    | 11.63139723 |
| DGUOK         | NM_080918    | 162.1165394 | 10.27032238 | 4.14E-13    | 15.78495138 |
| PABPC1        | NM_002568    | 225.6593965 | 22.17032543 | 2.49E-15    | 10.17844313 |
| PRKDC         | NM_006904    | 173.8703536 | 7.864632222 | 1.99E-14    | 22.10788104 |
| CD33          | NM_001177608 | 50.91653937 | 4.069485572 | 0.000273504 | 12.51178766 |
| TTYH2         | NM_032646    | 159.8901179 | 12.2722872  | 9.91E-12    | 13.02855085 |
| USP3-AS1      | NR_034080    | 251.232975  | 17.00005047 | 1.58E-19    | 14.77836642 |

|              |              |             |             |             |             |
|--------------|--------------|-------------|-------------|-------------|-------------|
| PCOLCE-AS1   | NR_038910    | 70.61321075 | 10.424058   | 0.000122421 | 6.774061578 |
| MANEA        | NM_024641    | 118.2703536 | 2.475649132 | 1.97E-12    | 47.77347164 |
| ARPC2        | NM_005731    | 79.5890429  | 10.48424741 | 3.28E-05    | 7.591297667 |
| IPP          | NM_001145349 | 221.6879679 | 3.637115124 | 5.21E-22    | 60.95159498 |
| DDX17        | NM_006386    | 176.0967751 | 11.93019252 | 6.55E-14    | 14.76059794 |
| USP8         | NM_005154    | 227.5648751 | 3.52173304  | 3.93E-22    | 64.61729849 |
| SFXN5        | NM_144579    | 136.0615464 | 8.864221518 | 5.72E-11    | 15.34952011 |
| ANAPC2       | NM_013366    | 119.3033286 | 11.43165905 | 1.19E-08    | 10.43622173 |
| ZNF436       | NM_030634    | 140.1934465 | 15.33709559 | 1.61E-09    | 9.140808029 |
| GYG1         | NM_001184721 | 177.8417822 | 8.437096551 | 1.30E-14    | 21.07855245 |
| FSD1L        | NM_001287191 | 111.3604715 | 2.693234008 | 9.84E-11    | 41.34823455 |
| MED8         | NM_201542    | 180.0682037 | 14.93359882 | 3.72E-13    | 12.05792427 |
| TCF25        | NM_014972    | 316.8417822 | 22.20675444 | 4.29E-23    | 14.26781131 |
| MNAT1        | NM_001177963 | 271.2505893 | 2.634066092 | 1.00E-26    | 102.977898  |
| C4orf27      | NM_017867    | 196.8264215 | 4.481136905 | 4.64E-20    | 43.92332251 |
| PPP4R2       | NM_174907    | 50.75606789 | 5.165678473 | 0.000727544 | 9.825634358 |
| WWOX         | NM_016373    | 95.31428571 | 0.989484106 | 7.08E-10    | 96.32725285 |
| MTMR3        | NM_021090    | 188.8835644 | 4.280051853 | 4.14E-17    | 44.13113926 |
| LINC00663    | NR_026956    | 123.2747572 | 4.145950288 | 5.40E-12    | 29.73377601 |
| MDH1B        | NR_104261    | 48.85058935 | 4.129396738 | 0.000987396 | 11.82995785 |
| EBLN3        | NR_036592    | 67.67475719 | 0.491870452 | 1.47E-09    | 137.5865474 |
| DPH2         | NM_001384    | 76.49011787 | 13.59625856 | 0.000281352 | 5.62582107  |
| ZFP36L2      | NM_006887    | 161.9560679 | 21.89138837 | 1.31E-09    | 7.398163385 |
| FANCD2       | NM_001018115 | 85.6264215  | 6.351901086 | 4.76E-07    | 13.48044    |
| COQ7         | NM_016138    | 68.7077322  | 7.498969324 | 4.15E-05    | 9.162290074 |
| USO1         | NM_001290049 | 166.0879679 | 4.857353553 | 4.62E-15    | 34.19309839 |
| PHF5A        | NM_032758    | 73.71213579 | 4.827763956 | 3.67E-06    | 15.26838024 |
| KIAA0907     | NM_014949    | 171.9648751 | 11.91971522 | 2.10E-13    | 14.42692815 |
| TRIM35       | NM_171982    | 138.2879679 | 9.619270998 | 9.83E-11    | 14.37613806 |
| GPC2         | NM_152742    | 104.2901179 | 12.94941617 | 5.72E-07    | 8.05365404  |
| SDC4         | NM_002999    | 206.5142857 | 13.46674847 | 7.52E-16    | 15.33512608 |
| ADCK2        | NM_052853    | 83.56047148 | 7.507947235 | 2.69E-06    | 11.12960292 |
| STAM2        | NM_005843    | 128.1186893 | 4.083255058 | 1.38E-11    | 31.37660702 |
| NUTM2A-AS1   | NR_024397    | 90.47035361 | 4.590778096 | 1.33E-07    | 19.70697597 |
| LOC101929633 | NR_110574    | 46.9451108  | 7.402045992 | 0.004889461 | 6.342180372 |
| C4orf29      | NM_001039717 | 211.6791608 | 5.380731004 | 6.32E-20    | 39.34022359 |
| PPM1F        | NM_014634    | 141.06595   | 11.69604317 | 4.80E-10    | 12.06099772 |
| TRAIIP       | NM_005879    | 133.6045073 | 8.818023615 | 1.81E-10    | 15.15129842 |
| RNASEH1-AS1  | NR_038429    | 97.54070721 | 21.95876311 | 0.000147704 | 4.441994603 |
| PCDH19       | NM_001184880 | 41.78023574 | 1.105192864 | 9.70E-05    | 37.80356996 |
| NDC80        | NM_006101    | 98.41321075 | 2.277375717 | 8.54E-10    | 43.21342764 |
| PON3         | NM_000940    | 85.46595002 | 3.733204467 | 2.03E-07    | 22.89345541 |
| SREBF1       | NM_004176    | 108.4220179 | 22.3585328  | 1.57E-05    | 4.849245649 |
| ICE2         | NM_001018089 | 233.4417822 | 4.468513462 | 8.86E-23    | 52.24148572 |
| ACO1         | NM_002197    | 238.4461858 | 4.835868512 | 8.87E-23    | 49.30783067 |
| PNLIP        | NM_000936    | 40.9077322  | 1.868855082 | 0.000889872 | 21.8891944  |
| GPN2         | NM_018066    | 162.9890429 | 13.51731377 | 2.08E-12    | 12.05779829 |
| NUMA1        | NR_104476    | 166.9604715 | 10.01707873 | 6.22E-13    | 16.66758104 |
| TNFSF12      | NR_037146    | 77.52309288 | 14.1951032  | 0.000316931 | 5.461256027 |
| TBXA2R       | NM_201636    | 99.44618576 | 8.14471537  | 1.28E-07    | 12.20990314 |
| TXNDC16      | NM_020784    | 170.0593965 | 3.008166414 | 7.04E-17    | 56.53257603 |
| TIAM1        | NM_003253    | 59.57142857 | 6.006162487 | 0.000145892 | 9.918384442 |
| METAP1D      | NM_199227    | 131.2176143 | 3.824427839 | 9.86E-12    | 34.31039095 |
| PSMD9        | NR_048555    | 164.0220179 | 9.871606357 | 3.23E-13    | 16.61553469 |
| ZDHHC12      | NM_032799    | 193.8879679 | 32.27419954 | 4.02E-10    | 6.007522129 |
| CNTROB       | NM_001037144 | 137.2549929 | 14.01533508 | 2.32E-09    | 9.793200961 |
| TMEM183B     | NM_001079809 | 126.2132108 | 7.650308437 | 3.74E-10    | 16.49779375 |
| PPM1L        | NM_139245    | 41.94070721 | 3.49410495  | 0.001045411 | 12.00327632 |
| MAN2B1       | NM_001173498 | 95.47475719 | 10.08084974 | 1.15E-06    | 9.470903709 |
| METTL2A      | NM_181725    | 191.9824894 | 12.57611498 | 3.78E-15    | 15.26564362 |
| POMK         | NM_032237    | 180.9407072 | 6.391897732 | 2.33E-16    | 28.30782262 |
| PRPF4B       | NM_003913    | 162.1165394 | 5.149284812 | 2.73E-15    | 31.48331182 |

|              |              |             |             |             |             |
|--------------|--------------|-------------|-------------|-------------|-------------|
| IL18         | NM_001562    | 90.47035361 | 6.64523763  | 3.14E-07    | 13.61431429 |
| ACADS        | NM_000017    | 119.4638001 | 9.879409398 | 1.96E-09    | 12.09220058 |
| COPS3        | NM_001199125 | 93.40880717 | 7.88718879  | 3.02E-07    | 11.84310527 |
| FANCF        | NM_022725    | 71.64618576 | 6.960697766 | 3.40E-05    | 10.2929603  |
| LHFPL2       | NM_005779    | 68.54726073 | 5.712355211 | 2.28E-05    | 11.99982463 |
| UQCC2        | NM_032340    | 180.9407072 | 13.07292696 | 7.84E-14    | 13.84087189 |
| TTLL7        | NM_024686    | 180.0682037 | 2.218070131 | 5.19E-18    | 81.18237615 |
| HECTD1       | NM_015382    | 90.79129656 | 4.019839388 | 1.28E-07    | 22.58580202 |
| RANGAP1      | NM_002883    | 138.2879679 | 15.27177217 | 5.76E-09    | 9.055135607 |
| CEP19        | NM_032898    | 212.5516643 | 9.566369424 | 1.76E-19    | 22.21863435 |
| MRPS21       | NM_031901    | 201.8308251 | 16.03723804 | 3.83E-15    | 12.5851362  |
| REST         | NM_005612    | 80.46154644 | 6.472153794 | 5.47E-06    | 12.43195836 |
| SEC23A       | NM_006364    | 94.44178218 | 2.871594232 | 4.59E-09    | 32.88827549 |
| IMPDH1       | NM_001142575 | 77.52309288 | 9.548020382 | 3.28E-05    | 8.119284394 |
| CCDC110      | NM_001145411 | 151.9472607 | 4.815425825 | 9.91E-15    | 31.55427293 |
| SNX29        | NM_032167    | 103.4176143 | 5.480971341 | 1.63E-08    | 18.86848296 |
| GPKOW        | NM_015698    | 51.7890429  | 7.2865603   | 0.001533306 | 7.107474689 |
| PRDX3        | NM_006793    | 295.2396323 | 14.29668059 | 4.03E-25    | 20.65092176 |
| C19orf40     | NM_152266    | 144.1648751 | 13.85144139 | 4.86E-10    | 10.40793308 |
| RPS5         | NM_001009    | 190.7890429 | 24.15154377 | 6.79E-12    | 7.89966243  |
| GDPD1        | NM_001165994 | 204.6088072 | 5.79362055  | 1.65E-19    | 35.31622504 |
| DAPL1        | NM_001017920 | 43.84618576 | 3.438588697 | 0.000616591 | 12.75121558 |
| VPS8         | NM_015303    | 123.5957001 | 4.406140686 | 1.68E-10    | 28.05078389 |
| AURKA        | NM_198437    | 100.4791608 | 8.51890631  | 6.28E-08    | 11.7948428  |
| OSR1         | NM_145260    | 66.64178218 | 8.228642378 | 0.000187088 | 8.098757865 |
| CCNL1        | NM_020307    | 185.7846393 | 21.20217692 | 5.04E-12    | 8.762526604 |
| EMC2         | NM_014673    | 145.1978501 | 2.551718544 | 2.18E-15    | 56.90198491 |
| LPIN3        | NM_022896    | 89.4373786  | 6.225086191 | 5.31E-07    | 14.36725145 |
| NGLY1        | NM_018297    | 201.6703536 | 3.959646693 | 1.93E-19    | 50.93140101 |
| NIPBL        | NM_133433    | 55.76047148 | 1.564898833 | 3.81E-05    | 35.63199761 |
| MAP3K1       | NM_005921    | 144.0044036 | 4.978104396 | 9.33E-13    | 28.92755799 |
| HAGH         | NM_001286249 | 97.54070721 | 10.73510692 | 5.87E-07    | 9.08614213  |
| SNX24        | NM_014035    | 63.54285714 | 4.779519853 | 7.44E-05    | 13.29482021 |
| RNF213       | NM_001256071 | 70.61321075 | 11.06437988 | 0.000217891 | 6.382030582 |
| RPUSD3       | NM_001142547 | 238.4461858 | 22.33092824 | 1.83E-16    | 10.67784479 |
| MRPL14       | NM_032111    | 139         | 10.65079881 | 9.51E-11    | 13.05066432 |
| PGM3         | NM_015599    | 193.7274965 | 7.31643239  | 8.72E-18    | 26.47840999 |
| HSD17B10     | NM_004493    | 101.3516643 | 6.790938093 | 2.98E-08    | 14.92454546 |
| ANKRD54      | NM_138797    | 156.9516643 | 12.70380445 | 1.22E-11    | 12.35469775 |
| FAM98A       | NM_015475    | 65.60880717 | 3.984439395 | 1.12E-05    | 16.46625803 |
| DNAJB4       | NM_007034    | 78.55606789 | 0.962600274 | 9.56E-10    | 81.60819191 |
| STX5         | NM_001244666 | 196.8264215 | 14.16867584 | 7.24E-15    | 13.89165958 |
| C5orf55      | NM_138464    | 171.0923715 | 14.27264742 | 3.21E-11    | 11.98743068 |
| SNRPA1       | NM_003090    | 138.2879679 | 8.582460999 | 1.92E-11    | 16.11285714 |
| CASP8AP2     | NM_001137668 | 197.698925  | 8.876907225 | 2.22E-16    | 22.27114918 |
| AKAP8L       | NM_001291478 | 141.2264215 | 11.85213452 | 5.65E-10    | 11.91569512 |
| HADH         | NM_005327    | 182.8461858 | 8.185141931 | 6.63E-16    | 22.33879233 |
| LOC101927814 | NR_110930    | 136.0615464 | 2.947712956 | 6.42E-15    | 46.15834325 |
| PODXL        | NM_001018111 | 112.232975  | 10.63870686 | 5.93E-08    | 10.54949408 |
| CCDC102A     | NM_033212    | 76.49011787 | 9.531800771 | 4.76E-05    | 8.024728979 |
| SLC1A1       | NM_004170    | 62.67035361 | 5.31457837  | 7.02E-05    | 11.79215909 |
| GSTA4        | NM_001512    | 78.55606789 | 7.230628766 | 7.75E-06    | 10.8643481  |
| CHAC1        | NM_024111    | 73.55166431 | 11.54762456 | 0.000121866 | 6.369419437 |
| CLASP2       | NM_015097    | 185.7846393 | 2.824575874 | 5.62E-18    | 65.774349   |
| ARHGAP40     | NM_001164431 | 43.84618576 | 6.845933386 | 0.004165782 | 6.404705289 |
| GTPBP8       | NM_138485    | 200.6373786 | 11.06232181 | 6.24E-17    | 18.13700433 |
| SS18         | NM_001007559 | 243.4505893 | 3.729399797 | 1.18E-23    | 65.27875868 |
| REV3L        | NM_001286432 | 158.1451108 | 3.979825144 | 5.06E-15    | 39.73669824 |
| ZNF33B       | NM_006955    | 257.2703536 | 5.180186656 | 2.23E-25    | 49.66430183 |
| CASC4        | NM_138423    | 205.6417822 | 5.243808542 | 8.95E-19    | 39.21611182 |
| PCGF6        | NM_001011663 | 130.3451108 | 8.618094284 | 1.05E-10    | 15.12458631 |
| YLPM1        | NM_019589    | 184.7516643 | 4.919841427 | 3.15E-17    | 37.55236161 |

|              |              |             |             |             |             |
|--------------|--------------|-------------|-------------|-------------|-------------|
| ZCCHC4       | NM_024936    | 77.68356436 | 3.565479006 | 2.96E-07    | 21.78769367 |
| MED24        | NM_001267797 | 64.73630363 | 10.06165517 | 0.000530169 | 6.43396166  |
| COQ3         | NM_017421    | 250.3604715 | 6.570853361 | 1.08E-23    | 38.10166773 |
| G6PD         | NM_001042351 | 79.5890429  | 14.35728087 | 0.000266248 | 5.54346214  |
| NUDT21       | NM_007006    | 131.2176143 | 4.185604368 | 7.49E-13    | 31.34974135 |
| CUL4A        | NM_003589    | 259.1758322 | 7.286263471 | 1.05E-23    | 35.57047219 |
| MTPAP        | NM_018109    | 80.62201792 | 5.546284991 | 1.18E-06    | 14.53621984 |
| ATP6AP2      | NM_005765    | 32.96487506 | 2.803714654 | 0.004708558 | 11.75757134 |
| STK36        | NM_001243313 | 103.4176143 | 6.664941734 | 3.43E-08    | 15.51665693 |
| SLC52A3      | NM_033409    | 81.49452145 | 11.52977699 | 2.55E-05    | 7.068178467 |
| LIG1         | NM_001289064 | 71.64618576 | 10.69654759 | 0.000196166 | 6.698066374 |
| DYNLT3       | NM_006520    | 83.56047148 | 0.256036498 | 3.87E-13    | 326.3615622 |
| LOC150776    | NR_026922    | 73.71213579 | 13.74617061 | 0.000325028 | 5.362376029 |
| CALB2        | NM_001740    | 47.81761433 | 7.600575211 | 0.004247748 | 6.291315197 |
| RSPH1        | NM_001286506 | 50.75606789 | 4.736643131 | 0.000526087 | 10.71562001 |
| MRVII-AS1    | NR_034094    | 134.3165394 | 5.639997948 | 5.45E-12    | 23.81499792 |
| TRERF1       | NM_033502    | 69.58023574 | 7.579710425 | 0.000107035 | 9.179801316 |
| ZFP14        | NM_001297619 | 112.553918  | 2.020310729 | 1.42E-11    | 55.71119153 |
| TMEM179B     | NM_199337    | 237.5736822 | 52.42775115 | 1.26E-09    | 4.531449032 |
| ANKRD18A     | NM_147195    | 35.90332862 | 2.47377956  | 0.002840586 | 14.51355214 |
| HSPA5        | NM_005347    | 257.2703536 | 15.04916799 | 5.56E-21    | 17.09532074 |
| SMAP1        | NM_021940    | 169.898925  | 2.694580051 | 2.47E-16    | 63.05209784 |
| FLII         | NM_002018    | 91.6638001  | 14.40086489 | 2.73E-05    | 6.365159369 |
| CASP9        | NR_102733    | 47.65714286 | 8.28547361  | 0.0043359   | 5.751891214 |
| UBQLN1       | NM_053067    | 55.76047148 | 7.616100921 | 0.000860764 | 7.321393461 |
| MRPL27       | NM_016504    | 214.7780858 | 31.06099382 | 3.94E-12    | 6.914720341 |
| PRSS12       | NM_003619    | 39.87475719 | 4.019887099 | 0.001760561 | 9.919372413 |
| LAMTOR5      | NM_006402    | 93.72975012 | 18.44333397 | 8.04E-05    | 5.082039411 |
| TBC1D20      | NR_111901    | 110.3274965 | 10.16312734 | 3.51E-08    | 10.85566408 |
| SUPT16H      | NM_007192    | 118.4308251 | 10.7514355  | 1.25E-08    | 11.01535    |
| SAMD12       | NM_207506    | 117.3978501 | 4.604674001 | 6.03E-10    | 25.49536624 |
| B3GNT3       | NM_014256    | 217.5560679 | 8.023816662 | 5.28E-20    | 27.1137885  |
| N6AMT1       | NM_182749    | 171.8044036 | 1.534726    | 4.73E-22    | 111.9446752 |
| TMEM39A      | NM_018266    | 123.4352287 | 7.328167783 | 4.33E-10    | 16.84394139 |
| STT3A        | NM_152713    | 58.85939651 | 6.024712534 | 9.70E-05    | 9.769660573 |
| SUFU         | NM_016169    | 151.0747572 | 11.89969191 | 1.92E-11    | 12.69568644 |
| SERPINE2     | NM_006216    | 117.2373786 | 5.120935317 | 2.98E-10    | 22.8937433  |
| LOC285626    | NR_037889    | 60.76487506 | 3.817142287 | 7.85E-05    | 15.9189442  |
| ENOX2        | NM_182314    | 93.40880717 | 1.853629489 | 8.65E-09    | 50.39238302 |
| SMARCD1      | NM_003076    | 58.69892504 | 12.87184214 | 0.003691044 | 4.560258307 |
| CLCN6        | NM_001286    | 60.76487506 | 7.644138242 | 0.000462042 | 7.94921195  |
| ZC3HAV1L     | NM_080660    | 177.8417822 | 12.19728716 | 3.28E-14    | 14.58043742 |
| MAFF         | NM_012323    | 116.3648751 | 14.64763996 | 1.41E-07    | 7.944274668 |
| HMGCS1       | NM_001098272 | 169.898925  | 6.394604188 | 2.72E-15    | 26.56910734 |
| LOC101927755 | NR_110815    | 115.4923715 | 5.615774943 | 2.76E-10    | 20.56570513 |
| TMEM30A      | NM_001143958 | 155.9186893 | 4.307174464 | 2.87E-15    | 36.19976172 |
| CPEB2-AS1    | NR_038857    | 154.1736822 | 2.127124302 | 1.26E-15    | 72.47986499 |
| GOLGA1       | NM_002077    | 175.9363036 | 8.511667145 | 4.49E-15    | 20.67001689 |
| CCDC34       | NM_080654    | 125.1802357 | 5.288350511 | 1.50E-11    | 23.67094153 |
| MDFIC        | NM_001166345 | 39.87475719 | 3.226630146 | 0.001777127 | 12.35801917 |
| SLC35G2      | NM_025246    | 91.34285714 | 5.364830176 | 7.59E-08    | 17.0262346  |
| MPHOSPH9     | NM_022782    | 275.2220179 | 6.746160977 | 7.79E-25    | 40.79683525 |
| SPINT1       | NM_181642    | 157.9846393 | 10.88852687 | 1.55E-12    | 14.50927579 |
| PRPS1        | NM_002764    | 106.3560679 | 3.587069401 | 5.17E-10    | 29.6498495  |
| LLPH-AS1     | NR_125724    | 238.6066572 | 15.44011814 | 5.56E-19    | 15.45368079 |
| ACAT2        | NM_005891    | 122.2417822 | 12.01496976 | 9.30E-09    | 10.17412317 |
| LAMC1        | NM_002293    | 61.6373786  | 4.132081846 | 6.99E-05    | 14.91678551 |
| EIF3A        | NM_003750    | 285.2308251 | 14.00284257 | 7.96E-23    | 20.36949453 |
| TRMT2B       | NM_001167972 | 90.47035361 | 5.40743274  | 8.70E-08    | 16.73074044 |
| PNMA1        | NM_006029    | 176.0967751 | 18.59065761 | 2.22E-11    | 9.472326303 |
| BCDIN3D      | NM_181708    | 201.6703536 | 19.8993769  | 4.69E-14    | 10.13450595 |
| LINC00941    | NR_040245    | 131.2176143 | 17.38361408 | 3.24E-08    | 7.548350631 |

|             |              |             |             |             |             |
|-------------|--------------|-------------|-------------|-------------|-------------|
| VEZT        | NM_017599    | 73.71213579 | 3.648245004 | 7.31E-07    | 20.20482059 |
| JUN         | NM_002228    | 197.8593965 | 29.16335214 | 5.21E-11    | 6.784521737 |
| FAM227A     | NM_001291030 | 89.59785007 | 7.494784539 | 1.52E-06    | 11.95469324 |
| VPS53       | NM_018289    | 124.3077322 | 6.627282116 | 9.30E-11    | 18.75697006 |
| LINC01273   | NR_109943    | 159.8901179 | 11.7696064  | 3.42E-12    | 13.58500127 |
| MCM3        | NM_001270472 | 88.72534654 | 8.995849836 | 3.73E-06    | 9.862919919 |
| CD2AP       | NM_012120    | 196.66595   | 2.892403082 | 2.05E-19    | 67.99396366 |
| WDR59       | NM_030581    | 99.44618576 | 6.22363526  | 2.28E-08    | 15.978794   |
| WHAMM       | NM_001080435 | 210.6461858 | 5.25988183  | 1.45E-20    | 40.04770308 |
| UQCC1       | NM_199487    | 119.3033286 | 7.097207248 | 1.98E-09    | 16.80989782 |
| DYNC2LI1    | NM_015522    | 161.9560679 | 5.566006918 | 3.46E-15    | 29.09735296 |
| RFXAP       | NM_000538    | 60.76487506 | 5.365064009 | 0.000183757 | 11.32602984 |
| RBFA        | NM_024805    | 157.9846393 | 5.191698328 | 4.10E-15    | 30.43024254 |
| GTF3C1      | NM_001286242 | 167.832975  | 11.47786    | 4.10E-13    | 14.62232289 |
| CUL7        | NM_014780    | 233.4417822 | 20.11651701 | 1.90E-16    | 11.60448312 |
| CRK         | NM_005206    | 119.1428571 | 13.29223434 | 3.85E-08    | 8.963343116 |
| ZNF678      | NR_102302    | 121.2088072 | 5.079250619 | 2.39E-10    | 23.86352166 |
| LYRM2       | NR_028495    | 155.9186893 | 7.048420865 | 7.19E-15    | 22.12108106 |
| TDG         | NM_003211    | 174.9033286 | 11.42900144 | 1.17E-13    | 15.30346545 |
| SLC16A1-AS1 | NR_103744    | 183.8791608 | 5.52556802  | 2.41E-18    | 33.2778748  |
| PDK3        | NM_005391    | 149.0088072 | 1.921038534 | 1.84E-15    | 77.56679763 |
| TBX3        | NM_016569    | 227.4044036 | 9.442464409 | 1.10E-20    | 24.08316238 |
| ERO1L       | NM_014584    | 45.75166431 | 1.510399302 | 0.000333245 | 30.2911053  |
| PLA2G10     | NM_003561    | 68.54726073 | 8.022360148 | 6.55E-05    | 8.544525483 |
| ERLIN2      | NM_001003790 | 90.47035361 | 10.36496362 | 4.02E-06    | 8.728477678 |
| ATG14       | NM_014924    | 139.320943  | 7.338216276 | 1.18E-11    | 18.98566868 |
| RBM45       | NM_152945    | 300.9560679 | 3.552686352 | 2.89E-35    | 84.7122538  |
| FAM53C      | NM_016605    | 242.4176143 | 20.87979154 | 4.32E-17    | 11.61015491 |
| CUTC        | NM_015960    | 225.6593965 | 7.397717417 | 1.48E-20    | 30.5039222  |
| TMEM65      | NM_194291    | 159.8901179 | 1.881777102 | 5.18E-17    | 84.96761797 |
| DPCD        | NM_015448    | 84.91438944 | 13.25310883 | 3.22E-05    | 6.40712987  |
| FAM46B      | NM_052943    | 217.7165394 | 22.45448774 | 1.72E-14    | 9.695903193 |
| FBXO31      | NM_001282683 | 279.1934465 | 15.26180757 | 7.26E-22    | 18.29360286 |
| CNP         | NM_033133    | 224.6264215 | 30.77042046 | 3.33E-13    | 7.300076441 |
| DHODH       | NM_001361    | 149.1692786 | 11.08578137 | 2.15E-11    | 13.4559102  |
| TMEM194B    | NM_001142645 | 151.9472607 | 6.683840747 | 2.66E-13    | 22.733525   |
| PSME2       | NM_002818    | 219.4615464 | 19.28731471 | 1.20E-15    | 11.37854335 |
| MEAF6       | NR_073091    | 115.3319    | 7.399107048 | 2.08E-09    | 15.5872728  |
| GLO1        | NM_006708    | 174.0308251 | 6.756074628 | 8.77E-16    | 25.75916263 |
| RAB3A       | NM_002866    | 164.8945215 | 19.37740077 | 7.25E-11    | 8.509630542 |
| METT16      | NM_152396    | 78.55606789 | 8.688242634 | 3.72E-05    | 9.041652173 |
| KIF26A      | NM_015656    | 43.84618576 | 6.364965273 | 0.004059184 | 6.888676353 |
| USP11       | NM_004651    | 118.2703536 | 7.198813384 | 4.06E-10    | 16.42914565 |
| POM121      | NM_001257190 | 83.72094295 | 13.42733331 | 7.81E-05    | 6.235113186 |
| CHTF18      | NM_022092    | 134.1560679 | 15.00155136 | 6.42E-09    | 8.942812959 |
| FAM24B      | NM_001204364 | 92.69677511 | 4.895955642 | 5.66E-08    | 18.93333639 |
| GOLIM4      | NM_014498    | 90.47035361 | 3.940497826 | 1.13E-07    | 22.95911776 |
| PEG10       | NM_001040152 | 60.76487506 | 7.514400717 | 0.000297635 | 8.086456571 |
| B9D1        | NM_015681    | 84.59344649 | 11.0696854  | 7.63E-06    | 7.641901593 |
| CCDC38      | NM_182496    | 41.78023574 | 5.981378657 | 0.00428771  | 6.985051129 |
| CDC42SE1    | NM_020239    | 182.8461858 | 18.22882301 | 2.06E-12    | 10.03060843 |
| LRAT        | NM_004744    | 217.5560679 | 2.242294515 | 6.73E-27    | 97.02385947 |
| MRPL15      | NM_014175    | 162.1165394 | 8.454994172 | 2.19E-14    | 19.1740569  |
| C8orf76     | NM_032847    | 257.4308251 | 15.09302085 | 3.65E-20    | 17.05628234 |
| LSS         | NM_001145436 | 138.1274965 | 6.807201673 | 1.70E-11    | 20.29137715 |
| CHURC1      | NM_145165    | 121.3692786 | 9.481942867 | 3.50E-09    | 12.80004323 |
| FAM175B     | NM_032182    | 94.92319661 | 9.35575134  | 1.61E-06    | 10.14597258 |
| HARS2       | NM_001278731 | 146.0703536 | 13.45508995 | 2.10E-10    | 10.85614099 |
| VAMP4       | NR_033704    | 109.6154644 | 4.236104282 | 1.11E-09    | 25.87647921 |
| GTPBP10     | NM_001042717 | 146.2308251 | 3.106790046 | 4.51E-15    | 47.0681388  |
| LINC00886   | NR_038387    | 105.4835644 | 4.811525906 | 4.26E-09    | 21.92310016 |
| ZFP30       | NM_014898    | 99.44618576 | 1.145165069 | 6.94E-12    | 86.84004466 |

|              |              |             |             |             |             |
|--------------|--------------|-------------|-------------|-------------|-------------|
| GPD2         | NM_000408    | 168.86595   | 3.722616183 | 2.65E-16    | 45.3621705  |
| IRF6         | NM_006147    | 174.9033286 | 8.766423428 | 6.50E-15    | 19.9515036  |
| CAP2         | NM_006366    | 52.66154644 | 4.698351864 | 0.000792461 | 11.20851481 |
| RNPS1        | NM_001286627 | 162.1165394 | 18.75878056 | 1.89E-10    | 8.642168336 |
| APIG1        | NM_001030007 | 113.26595   | 6.606457478 | 8.23E-10    | 17.14473307 |
| GPR162       | NM_019858    | 79.42857143 | 19.68626579 | 0.001070393 | 4.034720057 |
| C1orf204     | NM_001134233 | 66.64178218 | 14.21597967 | 0.001459071 | 4.687807925 |
| FBXO4        | NM_001297437 | 160.0505893 | 3.81952729  | 4.03E-16    | 41.9032454  |
| INCA1        | NM_001167987 | 155.0461858 | 13.2473903  | 9.86E-12    | 11.70390411 |
| PMF1         | NM_001199654 | 125.3407072 | 9.597921639 | 1.37E-09    | 13.05915092 |
| LOC100507419 | NR_123723    | 149.0088072 | 11.8024421  | 1.07E-11    | 12.62525212 |
| RPL26L1      | NM_016093    | 98.41321075 | 11.96093639 | 1.44E-06    | 8.227885135 |
| VPS9D1       | NM_004913    | 188.0110608 | 37.05355676 | 3.15E-09    | 5.074035457 |
| SMAD2        | NM_005901    | 70.61321075 | 3.789027547 | 1.52E-06    | 18.63623578 |
| CSNK1D       | NR_110578    | 203.5758322 | 26.02272758 | 3.16E-12    | 7.823001318 |
| LOC101927795 | NR_110275    | 146.2308251 | 8.061103073 | 2.07E-12    | 18.14029963 |
| SNRPG        | NM_003096    | 166.0879679 | 12.09811608 | 1.07E-12    | 13.7284158  |
| C1QC         | NM_172369    | 32.80440358 | 0.287698089 | 0.000240758 | 114.0237102 |
| PPP3CA       | NM_001130692 | 47.81761433 | 2.430116146 | 0.000297654 | 19.67709009 |
| CPE          | NM_001873    | 89.4373786  | 3.126926173 | 2.80E-08    | 28.60233138 |
| LAMTOR1      | NM_017907    | 151.0747572 | 19.23863465 | 1.09E-09    | 7.852675616 |
| LSM8         | NM_016200    | 103.4176143 | 6.756777383 | 1.99E-08    | 15.3057602  |
| TYW1B        | NM_001145440 | 198.019868  | 4.054918162 | 1.05E-17    | 48.83449186 |
| UBE2D1       | NM_003338    | 232.5692786 | 4.105975818 | 8.91E-24    | 56.64165815 |
| ZNF561-AS1   | NR_122038    | 293.0132108 | 8.418349634 | 3.84E-28    | 34.806491   |
| FAM149B1     | NM_173348    | 165.9274965 | 8.712875135 | 7.26E-14    | 19.04394289 |
| CSTF1        | NM_001033522 | 121.2088072 | 3.767568947 | 1.14E-11    | 32.17162283 |
| MYPOP        | NM_001012643 | 159.8901179 | 9.234996076 | 3.35E-13    | 17.31350144 |
| ZNF561       | NM_152289    | 209.7736822 | 6.94028376  | 4.28E-20    | 30.22551951 |
| MED23        | NM_004830    | 230.5033286 | 4.260842703 | 2.60E-23    | 54.09806104 |
| ANKLE1       | NM_001278444 | 136.0615464 | 12.72897523 | 6.02E-10    | 10.68912021 |
| PTPN11       | NM_080601    | 208.5802357 | 8.748558418 | 4.18E-18    | 23.84166919 |
| C21orf119    | NR_026845    | 249.3274965 | 41.17000479 | 1.20E-08    | 6.056047303 |
| FBXW2        | NM_012164    | 214.6176143 | 8.782731283 | 2.40E-18    | 24.43631798 |
| LRPAP1       | NM_002337    | 290.0747572 | 13.26119677 | 3.47E-24    | 21.87395015 |
| PPARGC1B     | NM_001172698 | 77.68356436 | 8.087936044 | 1.82E-05    | 9.604868774 |
| ORMDL1       | NM_001128150 | 267.2791608 | 9.49665544  | 1.99E-24    | 28.14455705 |
| EEF1G        | NM_001404    | 92.53630363 | 22.23472054 | 0.000263721 | 4.16179297  |
| SERPINB5     | NM_002639    | 107.3890429 | 7.675033407 | 9.69E-09    | 13.9919968  |
| IWS1         | NM_017969    | 85.6264215  | 6.378476199 | 3.79E-07    | 13.42427546 |
| VPS35        | NM_018206    | 162.9890429 | 3.613294391 | 2.39E-16    | 45.10815485 |
| ACAP2        | NM_012287    | 169.898925  | 3.366594628 | 2.70E-16    | 50.46610709 |
| MED13        | NM_005121    | 44.7186893  | 5.564997452 | 0.002492159 | 8.035707058 |
| SLC9B2       | NM_178833    | 125.1802357 | 3.092053068 | 1.19E-12    | 40.4845043  |
| TXNDC11      | NM_015914    | 113.26595   | 8.076148538 | 5.55E-09    | 14.02474824 |
| ROPN1B       | NM_001012337 | 95.79570014 | 9.688220176 | 4.02E-07    | 9.887853332 |
| ZNF684       | NM_152373    | 132.2505893 | 2.964266663 | 5.98E-14    | 44.61494339 |
| PLXNA2       | NM_025179    | 91.50332862 | 5.122488188 | 1.70E-07    | 17.86306288 |
| SIRT1        | NM_012238    | 90.47035361 | 7.425520874 | 5.43E-07    | 12.1837047  |
| SEC22B       | NM_004892    | 178.0022537 | 4.402443449 | 2.15E-17    | 40.43260424 |
| SPATA5L1     | NM_024063    | 135.1890429 | 8.084053684 | 7.71E-11    | 16.72292741 |
| STYX         | NM_001130701 | 191.9824894 | 4.290385382 | 1.27E-18    | 44.74714328 |
| BTBD7        | NM_001002860 | 62.67035361 | 5.501471465 | 7.04E-05    | 11.39156206 |
| PELP1        | NM_014389    | 217.5560679 | 8.720708371 | 8.76E-19    | 24.94706377 |
| SHOC2        | NM_007373    | 100.4791608 | 2.520201437 | 1.32E-09    | 39.86949587 |
| NIFK         | NM_032390    | 169.898925  | 10.16886121 | 2.04E-14    | 16.7077632  |
| ARHGAP19     | NM_032900    | 146.0703536 | 3.318504603 | 1.62E-14    | 44.0169206  |
| FRYL         | NM_015030    | 158.1451108 | 2.937175454 | 5.57E-15    | 53.8425822  |
| GAS5         | NR_002578    | 280.2264215 | 44.88869624 | 2.69E-14    | 6.242694597 |
| ENTPD3-AS1   | NR_040100    | 100.3186893 | 4.945893882 | 1.49E-08    | 20.28322719 |
| FAM86JP      | NR_024250    | 129.1516643 | 10.10449016 | 1.21E-09    | 12.78161117 |
| NAPA-AS1     | NR_038452    | 136.0615464 | 11.90609218 | 3.74E-10    | 11.42789291 |

|               |              |             |             |             |             |
|---------------|--------------|-------------|-------------|-------------|-------------|
| LOC101927204  | NR_110184    | 90.63082508 | 5.023956104 | 3.72E-08    | 18.03973267 |
| HAUS8         | NM_001011699 | 131.2176143 | 11.65877591 | 2.31E-09    | 11.2548363  |
| STEAP1        | NM_012449    | 89.75832155 | 5.127549044 | 1.28E-07    | 17.50511224 |
| PARD6B        | NM_032521    | 162.2770108 | 6.850772692 | 8.47E-15    | 23.68740259 |
| ERCC8         | NM_001290285 | 75.61761433 | 3.06339182  | 6.10E-07    | 24.68427768 |
| DNPEP         | NM_012100    | 95.31428571 | 12.55316366 | 4.12E-06    | 7.592849763 |
| ZFHX2         | NM_033400    | 77.68356436 | 16.68490323 | 0.000568848 | 4.655919385 |
| WFDC3         | NM_080614    | 65.76927864 | 8.202550549 | 0.000108475 | 8.018149751 |
| SRSF6         | NR_034009    | 388.3274965 | 21.55164228 | 5.11E-32    | 18.01846427 |
| ADPRH         | NM_001291949 | 57.8264215  | 5.353843082 | 8.45E-05    | 10.80091826 |
| TXN           | NM_003329    | 145.0373786 | 13.24021756 | 1.68E-10    | 10.95430479 |
| DIMT1         | NM_014473    | 198.7319    | 7.327290208 | 1.12E-18    | 27.1221549  |
| RWDD2B        | NM_016940    | 151.0747572 | 7.143149986 | 2.58E-13    | 21.14959891 |
| VSIG10        | NM_019086    | 171.9648751 | 9.029559972 | 6.85E-14    | 19.04465728 |
| ZBTB8B        | NM_001145720 | 49.72309288 | 6.453630004 | 0.001078774 | 7.704670526 |
| SRSF8         | NM_032102    | 151.9472607 | 33.32601649 | 1.11E-06    | 4.559418639 |
| TRNAU1AP      | NR_003109    | 132.2505893 | 21.59322504 | 2.16E-07    | 6.124633496 |
| EIF2S1        | NM_004094    | 170.7714286 | 5.499288236 | 7.80E-16    | 31.05336932 |
| MFI2          | NM_005929    | 83.56047148 | 15.71098318 | 0.000197908 | 5.318602313 |
| RAB8B         | NM_016530    | 75.61761433 | 3.357043122 | 6.76E-07    | 22.52506494 |
| MPHOSPH6      | NM_005792    | 284.1978501 | 12.02035825 | 4.54E-24    | 23.64304325 |
| IPO9-AS1      | NR_046696    | 122.2417822 | 7.141172148 | 1.18E-09    | 17.1178876  |
| ARHGAP11B     | NM_001039841 | 45.75166431 | 5.279990641 | 0.001399457 | 8.665103297 |
| MAN2A1        | NM_002372    | 186.8176143 | 3.790394923 | 6.24E-18    | 49.28711075 |
| RAB5C         | NM_201434    | 74.7451108  | 9.125118851 | 2.38E-05    | 8.191138331 |
| LOC102723582  | NR_125405    | 189.7560679 | 10.43488355 | 7.40E-16    | 18.18478059 |
| PSPH          | NM_004577    | 167.9934465 | 10.99193838 | 1.79E-13    | 15.28333226 |
| PFDN2         | NM_012394    | 190.9495144 | 10.32402763 | 6.54E-16    | 18.49564155 |
| ZNF738        | NR_027130    | 101.5121358 | 4.608622735 | 3.03E-09    | 22.02656664 |
| JMJD7-PLA2G4B | NM_001198588 | 158.1451108 | 14.27539328 | 3.57E-11    | 11.0781614  |
| THEM4         | NM_053055    | 247.2615464 | 10.08246137 | 1.40E-21    | 24.52392698 |
| FANCB         | NM_152633    | 96.34726073 | 1.023319297 | 3.00E-11    | 94.15170908 |
| RBCK1         | NM_031229    | 171.8044036 | 14.09182149 | 1.87E-12    | 12.19178115 |
| ANP32A        | NM_006305    | 94.44178218 | 12.31447191 | 7.60E-06    | 7.669170297 |
| SERP1         | NM_014445    | 107.3890429 | 16.31858963 | 1.91E-06    | 6.58077967  |
| LRRC28        | NM_001284400 | 170.7714286 | 3.840141418 | 1.23E-16    | 44.47008846 |
| PTCHD2        | NM_020780    | 201.8308251 | 7.684921708 | 9.08E-18    | 26.26322463 |
| TACC3         | NM_006342    | 73.55166431 | 17.7864446  | 0.002190183 | 4.135265139 |
| LINC00944     | NR_033878    | 43.84618576 | 1.868415768 | 0.000646366 | 23.46703904 |
| ZBTB9         | NM_152735    | 199.6044036 | 24.91224529 | 6.41E-12    | 8.01230083  |
| PLEKHA4       | NM_020904    | 45.91213579 | 6.328981717 | 0.002142431 | 7.254268986 |
| ANTXR2        | NM_001145794 | 83.72094295 | 1.417681117 | 5.06E-08    | 59.05484804 |
| PSMC6         | NM_002806    | 135.1890429 | 4.728210263 | 4.08E-13    | 28.59201165 |
| KRT222        | NM_152349    | 52.82201792 | 4.954169898 | 0.000290837 | 10.66213291 |
| ARFGAP2       | NM_001242832 | 67.67475719 | 14.98385902 | 0.00196843  | 4.516510539 |
| LINC01461     | NR_125761    | 115.3319    | 4.270656925 | 8.47E-11    | 27.00565793 |
| PDE6D         | NM_001291018 | 240.5121358 | 4.932148415 | 1.29E-23    | 48.76417244 |
| GOLGB1        | NM_004487    | 191.8220179 | 5.465427486 | 1.36E-17    | 35.09734937 |
| ILF2          | NM_001267809 | 144.1648751 | 19.00795476 | 5.58E-09    | 7.584449611 |
| CEP44         | NM_001145314 | 75.93855729 | 2.765988038 | 2.13E-07    | 27.45440553 |
| C1D           | NM_001190263 | 84.75391796 | 3.927346274 | 1.01E-07    | 21.5804546  |
| TRIM14        | NM_033219    | 95.63522867 | 8.634858334 | 3.27E-07    | 11.07548323 |
| MTHFS         | NM_006441    | 236.5407072 | 5.757677291 | 9.48E-22    | 41.08266151 |
| VAMP8         | NM_003761    | 110.3274965 | 9.970123534 | 1.81E-08    | 11.06581038 |
| SNAI2         | NM_003068    | 64.73630363 | 5.842397795 | 3.86E-05    | 11.08043408 |
| ITGB1         | NM_002211    | 41.78023574 | 4.343764004 | 0.004025051 | 9.618440527 |
| IMPAD1        | NM_017813    | 75.45714286 | 2.662571302 | 2.98E-07    | 28.33995198 |
| MICU1         | NM_001195518 | 95.47475719 | 4.098667341 | 1.08E-08    | 23.29409763 |
| KIDINS220     | NM_020738    | 103.4176143 | 3.66359609  | 1.02E-09    | 28.22844326 |
| RSBN1         | NM_018364    | 94.44178218 | 3.484925437 | 3.91E-09    | 27.1000869  |
| ZC3H7B        | NM_017590    | 93.56927864 | 8.943897388 | 4.32E-07    | 10.46180145 |
| HMSD          | NM_001123366 | 40.9077322  | 2.288409328 | 0.000605096 | 17.87605552 |



|               |              |             |             |             |             |
|---------------|--------------|-------------|-------------|-------------|-------------|
| WDR33         | NM_001006623 | 202.7033286 | 6.133376002 | 9.21E-19    | 33.04922583 |
| FBXO36        | NM_174899    | 101.5121358 | 6.127353977 | 1.10E-08    | 16.56704283 |
| RNF26         | NM_032015    | 111.520943  | 23.32389576 | 3.97E-05    | 4.781402906 |
| PTCD3         | NM_017952    | 195.953918  | 10.61591319 | 2.06E-16    | 18.45850795 |
| OFD1          | NM_003611    | 142.9714286 | 2.967873188 | 4.68E-14    | 48.17302476 |
| UBALD1        | NM_145253    | 75.61761433 | 9.499225633 | 8.77E-05    | 7.960397748 |
| DDX47         | NM_016355    | 74.7451108  | 4.162924374 | 1.46E-06    | 17.95495284 |
| CYB5RL        | NM_001031672 | 72.67916077 | 8.374634342 | 4.05E-05    | 8.678487658 |
| HID1          | NM_030630    | 111.6814144 | 9.260869698 | 2.56E-08    | 12.05949528 |
| COX4I1        | NM_001861    | 212.0001037 | 27.89237936 | 1.60E-12    | 7.600646077 |
| RIOK3         | NM_003831    | 103.4176143 | 10.31487801 | 2.52E-07    | 10.02606276 |
| LMBRD1        | NM_018368    | 54.72749646 | 1.677613337 | 6.57E-05    | 32.62223496 |
| YTHDC2        | NM_022828    | 104.4505893 | 2.899694903 | 3.29E-10    | 36.02123425 |
| PSEN1         | NM_007318    | 205.6417822 | 5.664506134 | 5.34E-19    | 36.30356774 |
| HERPUD2       | NM_022373    | 133.2835644 | 3.969115741 | 3.64E-12    | 33.58016572 |
| TMED8         | NM_213601    | 119.3033286 | 6.008681976 | 8.88E-11    | 19.85515777 |
| ALG12         | NM_024105    | 79.74951438 | 17.22443767 | 0.000727742 | 4.630021362 |
| PHLDA1        | NM_007350    | 128.2791608 | 23.36962766 | 8.55E-07    | 5.48914012  |
| BCKDHA        | NM_000709    | 127.2461858 | 11.13893475 | 8.66E-10    | 11.42355069 |
| GLA           | NM_000169    | 77.68356436 | 13.06577343 | 0.000113465 | 5.945577181 |
| PFKFB2        | NM_006212    | 247.4220179 | 9.271038073 | 1.51E-22    | 26.68762829 |
| RELL2         | NM_173828    | 171.9648751 | 39.28203631 | 4.36E-07    | 4.377697575 |
| SYMPK         | NM_004819    | 60.76487506 | 12.37166229 | 0.001671334 | 4.911617665 |
| KIF2A         | NM_001243952 | 84.59344649 | 4.146363885 | 4.10E-07    | 20.40183854 |
| SLC16A5       | NM_004695    | 232.5692786 | 16.12368032 | 9.54E-18    | 14.42408147 |
| ZNF394        | NM_032164    | 136.3824894 | 11.37716445 | 1.54E-10    | 11.98738843 |
| KIF11         | NM_004523    | 95.47475719 | 4.941833699 | 5.55E-08    | 19.31970257 |
| DDX41         | NM_016222    | 112.3934465 | 8.819064222 | 4.96E-09    | 12.74437329 |
| LOC101927066  | NR_125390    | 43.84618576 | 3.66317504  | 0.001062026 | 11.96944871 |
| ZNF252P       | NR_023392    | 209.7736822 | 7.179931127 | 2.57E-19    | 29.21667054 |
| DENR          | NM_003677    | 223.5934465 | 9.770001549 | 2.68E-19    | 22.88571249 |
| PPP4R1L       | NR_003505    | 141.06595   | 6.122023957 | 2.13E-12    | 23.04237145 |
| TRIP10        | NM_001288963 | 92.37583215 | 21.31146693 | 0.000236989 | 4.334560002 |
| WDR92         | NR_046234    | 103.2571429 | 2.316687342 | 3.79E-11    | 44.57103079 |
| POMZP3        | NM_152992    | 298.1780858 | 12.35374197 | 3.47E-26    | 24.13666131 |
| OCRL          | NM_000276    | 57.66595002 | 2.764838945 | 2.92E-05    | 20.85689299 |
| SAR1B         | NM_016103    | 159.0176143 | 3.61990656  | 6.93E-16    | 43.92865166 |
| TBC1D10A      | NM_001204240 | 156.9516643 | 12.83168022 | 1.37E-11    | 12.23157542 |
| LINC00894     | NR_027456    | 56.63297501 | 4.945137475 | 0.000224121 | 11.45225493 |
| KIAA0355      | NM_014686    | 47.81761433 | 6.40828407  | 0.001396778 | 7.461843734 |
| AP3B2         | NM_001278512 | 101.3516643 | 6.473891968 | 1.56E-08    | 15.65544572 |
| ITGB3BP       | NR_045147    | 185.7846393 | 3.571339993 | 1.95E-17    | 52.02098924 |
| SYCE2         | NM_001105578 | 99.44618576 | 14.62713753 | 6.41E-06    | 6.798745519 |
| PES1          | NM_001243225 | 70.61321075 | 13.19556    | 0.000444939 | 5.351285642 |
| FAM161B       | NM_152445    | 160.0505893 | 13.98137343 | 1.40E-11    | 11.44741539 |
| HDDC2         | NM_016063    | 86.49892504 | 5.495093865 | 2.21E-07    | 15.74111874 |
| FKBP1A-SDCBP2 | NR_037661    | 135.1890429 | 12.75320974 | 3.07E-09    | 10.6003936  |
| LINC00240     | NR_026775    | 44.7186893  | 2.888372762 | 0.000459827 | 15.48231235 |
| BMP8B         | NM_001720    | 145.0373786 | 13.34267665 | 1.45E-10    | 10.87018612 |
| NET1          | NR_073040    | 81.65499293 | 3.185412569 | 4.95E-08    | 25.63403991 |
| TMED5         | NM_016040    | 111.3604715 | 6.010026878 | 4.13E-09    | 18.52911372 |
| RBM20         | NM_001134363 | 78.55606789 | 6.848725753 | 3.81E-06    | 11.47017281 |
| ARL6IP6       | NM_152522    | 112.3934465 | 8.047398519 | 8.03E-09    | 13.96643229 |
| KIAA1429      | NM_183009    | 85.6264215  | 7.505014565 | 2.20E-06    | 11.40922789 |
| PPIL4         | NM_139126    | 141.2264215 | 5.298512123 | 7.34E-13    | 26.65397723 |
| USP46-AS1     | NR_125363    | 102.3846393 | 24.74504398 | 0.000294718 | 4.137581627 |
| MIP           | NM_021933    | 165.9274965 | 13.80719312 | 1.75E-12    | 12.01746764 |
| ZNF724P       | NR_045525    | 102.3846393 | 3.888848931 | 1.85E-09    | 26.3277492  |
| LOC339874     | NR_038976    | 128.2791608 | 7.545257268 | 2.04E-10    | 17.00129713 |
| TTC13         | NM_001122835 | 72.67916077 | 4.311555153 | 9.66E-06    | 16.85683198 |
| LOC100129940  | NM_001292024 | 41.78023574 | 6.608945144 | 0.003887321 | 6.321770695 |
| ITPR1-AS1     | NR_108075    | 127.2461858 | 6.181979628 | 9.04E-12    | 20.58340425 |

|                |              |             |             |             |             |
|----------------|--------------|-------------|-------------|-------------|-------------|
| ATXN2          | NM_002973    | 61.79785007 | 5.613399199 | 7.49E-05    | 11.00898901 |
| MCAM           | NM_006500    | 69.58023574 | 14.26016741 | 0.001593359 | 4.879342138 |
| BMPR2          | NM_001204    | 67.67475719 | 4.244419638 | 2.24E-05    | 15.94440771 |
| TNKS           | NM_003747    | 75.61761433 | 3.427583328 | 9.57E-07    | 22.06149555 |
| ERCC6L2        | NM_001010895 | 157.1121358 | 3.854613718 | 2.72E-14    | 40.75950206 |
| MTBP           | NM_022045    | 172.1253465 | 3.168228837 | 2.99E-17    | 54.32857139 |
| ZC3H3          | NM_015117    | 144.3253465 | 11.25648754 | 5.76E-11    | 12.8215259  |
| RPP30          | NM_001104546 | 132.4110608 | 5.133614411 | 4.44E-12    | 25.79295019 |
| RALGAPB        | NM_020336    | 57.8264215  | 5.26056392  | 0.000237334 | 10.99243777 |
| SNRPB          | NM_198216    | 212.5516643 | 12.9635328  | 2.30E-17    | 16.39612192 |
| PARVA          | NM_018222    | 76.65058935 | 6.884754923 | 3.72E-06    | 11.1333795  |
| ARMCX5-GPRASP2 | NM_001199818 | 58.69892504 | 2.589842273 | 2.00E-05    | 22.66505789 |
| LOC101928710   | NR_110849    | 74.58463932 | 12.75462794 | 0.000248164 | 5.847653079 |
| RMND5B         | NM_022762    | 78.71653937 | 16.52216526 | 0.000291311 | 4.76429924  |
| MECR           | NM_016011    | 166.9604715 | 9.893986462 | 2.70E-13    | 16.8749444  |
| PTMA           | NM_002823    | 216.5230929 | 45.88518351 | 1.13E-09    | 4.718801938 |
| BCL2L1         | NM_001191    | 70.61321075 | 8.371748505 | 5.15E-05    | 8.434702823 |
| DPP7           | NM_013379    | 137.0945215 | 12.45219003 | 5.80E-10    | 11.00967148 |
| PIP4K2C        | NM_024779    | 155.2066572 | 7.664519757 | 1.05E-13    | 20.25001724 |
| C9orf41        | NM_152420    | 130.3451108 | 3.783532145 | 3.77E-12    | 34.45064183 |
| AGAP11         | NM_133447    | 160.9230929 | 7.992249762 | 1.02E-13    | 20.13489289 |
| BLOC1S5        | NM_001199322 | 137.0945215 | 3.080331667 | 5.89E-14    | 44.50641563 |
| PMPCA          | NM_015160    | 138.2879679 | 13.16833629 | 1.26E-09    | 10.50155197 |
| TNS3           | NM_022748    | 47.81761433 | 6.094291653 | 0.001468308 | 7.84629569  |
| SMG8           | NM_018149    | 234.6352287 | 16.64315215 | 4.47E-18    | 14.09800419 |
| DTX4           | NM_015177    | 47.65714286 | 8.05523692  | 0.004380581 | 5.916293131 |
| GSTM4          | NM_000850    | 82.68796794 | 15.03559072 | 0.000193515 | 5.499482495 |
| NDUFB9         | NM_005005    | 295.0791608 | 20.66331333 | 1.61E-22    | 14.28034101 |
| NSD1           | NM_022455    | 101.3516643 | 6.150088799 | 2.56E-08    | 16.47970747 |
| DEXI           | NM_014015    | 107.3890429 | 11.57518639 | 1.55E-07    | 9.277521702 |
| CDX2           | NM_001265    | 223.5934465 | 21.62223291 | 2.81E-15    | 10.34090454 |
| ZNHIT6         | NM_017953    | 117.2373786 | 3.113660252 | 1.39E-11    | 37.65259183 |
| GGH            | NM_003878    | 132.2505893 | 6.650975495 | 2.57E-11    | 19.88438981 |
| DNAJB12        | NM_017626    | 133.1230929 | 15.23888115 | 6.26E-09    | 8.735752418 |
| LGALS8         | NM_006499    | 59.73190005 | 13.17705323 | 0.004244886 | 4.533024116 |
| LNX2           | NM_153371    | 48.85058935 | 4.918302343 | 0.001317944 | 9.932408774 |
| DISP1          | NM_032890    | 201.8308251 | 2.246769787 | 5.14E-20    | 89.83155561 |
| HLTF           | NM_003071    | 150.2022537 | 3.481532891 | 3.32E-14    | 43.14256345 |
| INTS10         | NM_018142    | 303.0220179 | 8.506958369 | 7.57E-28    | 35.62048911 |
| GTF3C3         | NM_012086    | 102.4352287 | 5.331438244 | 3.93E-11    | 23.15233208 |
| GFPT1          | NM_002056    | 189.7560679 | 4.509562164 | 1.05E-17    | 42.0786012  |
| EBP            | NM_006579    | 80.46154644 | 2.793815361 | 1.58E-08    | 28.79987975 |
| ALDH16A1       | NM_153329    | 266.2461858 | 14.87069058 | 2.00E-21    | 17.90409022 |
| SLC26A11       | NM_001166348 | 78.55606789 | 10.43434921 | 5.60E-05    | 7.528602536 |
| UTP20          | NM_014503    | 65.76927864 | 4.554724185 | 3.77E-05    | 14.43979393 |
| PSPC1          | NR_003272    | 119.4638001 | 4.338746429 | 2.08E-10    | 27.53417423 |
| KLHL24         | NM_017644    | 152.1077322 | 4.786929612 | 4.95E-14    | 31.77563585 |
| WDR82          | NM_025222    | 104.2901179 | 12.6844161  | 5.72E-07    | 8.221909235 |
| LOC100419583   | NR_125376    | 113.586893  | 12.35284632 | 1.47E-07    | 9.195200044 |
| MST1R          | NM_002447    | 298.8901179 | 16.35131983 | 4.06E-24    | 18.27926558 |
| GTF2H1         | NM_001142307 | 96.5077322  | 4.429742539 | 1.97E-08    | 21.7863073  |
| RNF20          | NM_019592    | 117.3978501 | 5.926962832 | 9.75E-10    | 19.80742134 |
| UQCR10         | NM_013387    | 131.2176143 | 14.65187051 | 1.59E-08    | 8.955690283 |
| CCDC138        | NM_144978    | 102.3846393 | 3.678799614 | 8.89E-10    | 27.8309911  |
| GOLPH3L        | NM_018178    | 87.53190005 | 5.012696999 | 1.81E-07    | 17.46203691 |
| MEF2BNB        | NM_001145784 | 102.5451108 | 19.41152951 | 1.17E-05    | 5.282690925 |
| SAMD3          | NM_001258275 | 44.87916077 | 3.299445284 | 0.000552641 | 13.60203213 |
| PCCB           | NM_000532    | 181.9736822 | 5.531023791 | 9.03E-17    | 32.9005423  |
| TMEM209        | NM_032842    | 197.8593965 | 3.087419574 | 4.45E-20    | 64.08568443 |
| USP12-AS2      | NR_046548    | 57.66595002 | 5.099984862 | 8.61E-05    | 11.30708259 |
| ESCO1          | NM_052911    | 196.8264215 | 4.425545337 | 1.47E-18    | 44.47506612 |
| RIN1           | NM_004292    | 102.5451108 | 14.16957648 | 1.48E-06    | 7.23699194  |

|            |              |             |             |             |             |
|------------|--------------|-------------|-------------|-------------|-------------|
| HS1BP3     | NM_022460    | 123.2747572 | 10.96290919 | 3.70E-09    | 11.24471206 |
| TRIM52     | NM_032765    | 268.1516643 | 31.05644659 | 1.08E-16    | 8.634331798 |
| THEM6      | NM_016647    | 236.5407072 | 35.71042815 | 3.85E-13    | 6.623855256 |
| ERMARD     | NM_001278533 | 155.3671287 | 9.022348716 | 2.12E-12    | 17.22025313 |
| GABARAPL2  | NM_007285    | 134.1560679 | 14.68680015 | 2.28E-09    | 9.134465406 |
| GALT       | NM_001258332 | 160.2110608 | 23.30446857 | 2.64E-09    | 6.874692737 |
| OSGEPL1    | NM_022353    | 77.52309288 | 5.865237066 | 5.93E-06    | 13.2173844  |
| ETAA1      | NM_019002    | 150.0417822 | 4.619309988 | 4.19E-15    | 32.48142743 |
| LAMTOR4    | NM_001008395 | 154.0132108 | 23.83403687 | 7.93E-09    | 6.461902009 |
| TMEM189    | NM_001162505 | 114.298925  | 13.71548219 | 1.17E-07    | 8.333569573 |
| PLOD3      | NM_001084    | 162.8285714 | 10.03381794 | 1.71E-13    | 16.22797747 |
| WDR63      | NM_145172    | 45.03963225 | 3.302061373 | 0.000479757 | 13.63985316 |
| UHRF2      | NR_046386    | 118.2703536 | 4.006848679 | 3.37E-10    | 29.5170502  |
| ARHGAP44   | NM_014859    | 61.6373786  | 4.354422016 | 7.54E-05    | 14.15512285 |
| ZCCHC9     | NM_001131035 | 219.4615464 | 5.624023168 | 8.69E-23    | 39.02216258 |
| GATB       | NM_004564    | 77.68356436 | 6.491782558 | 3.33E-06    | 11.96644584 |
| 3-Mar      | NM_178450    | 202.7033286 | 5.679724738 | 2.59E-18    | 35.68893529 |
| PHIP       | NM_017934    | 110.3274965 | 2.236251589 | 1.12E-10    | 49.33590524 |
| PTS        | NM_000317    | 192.8549929 | 13.05516479 | 1.49E-15    | 14.77231395 |
| PAXIP1-AS1 | NR_028090    | 151.0747572 | 21.31006349 | 1.23E-08    | 7.089362133 |
| CSE1L      | NM_001256135 | 223.5934465 | 8.654253606 | 7.60E-19    | 25.83624847 |
| ZC3H8      | NM_032494    | 180.7802357 | 3.220914554 | 4.57E-18    | 56.12698899 |
| DOCK1      | NM_001290223 | 70.61321075 | 6.893581674 | 1.37E-05    | 10.24332692 |
| CEP104     | NM_014704    | 107.3890429 | 7.587673093 | 1.50E-08    | 14.153093   |
| NCKAP5L    | NM_001037806 | 107.2285714 | 7.426477449 | 1.25E-08    | 14.43868539 |
| TMEM167B   | NM_020141    | 112.3934465 | 9.067120625 | 8.25E-09    | 12.39571537 |
| SPIDR      | NM_001282916 | 125.1802357 | 4.121325056 | 1.03E-11    | 30.37378368 |
| NDUFA7     | NM_005001    | 155.2066572 | 17.41507074 | 4.59E-10    | 8.912203661 |
| RBM4B      | NM_001286135 | 166.9604715 | 24.12483047 | 1.55E-09    | 6.920689938 |
| PLD1       | NM_002662    | 125.3407072 | 3.772862006 | 7.57E-12    | 33.22165163 |
| APEX2      | NM_001271748 | 105.3230929 | 8.294979857 | 1.05E-08    | 12.697209   |
| FASTKD5    | NM_021826    | 124.3077322 | 8.477763121 | 3.05E-10    | 14.66279848 |
| ACLY       | NM_001096    | 197.698925  | 13.10719857 | 3.74E-15    | 15.08323262 |
| ZNHIT1     | NM_006349    | 122.2417822 | 15.69503158 | 4.16E-08    | 7.788565544 |
| PLSCR1     | NM_021105    | 149.0088072 | 5.201139385 | 3.66E-14    | 28.64926243 |
| PNPLA6     | NM_001166112 | 130.1846393 | 10.27206745 | 4.20E-10    | 12.67365503 |
| KDM4A-AS1  | NR_033827    | 220.6549929 | 20.50067358 | 1.25E-15    | 10.76330454 |
| SGTB       | NM_019072    | 135.1890429 | 4.041026883 | 3.14E-12    | 33.45413104 |
| PRPF38B    | NM_018061    | 259.4967751 | 11.0367748  | 1.97E-23    | 23.51201142 |
| MGEA5      | NM_001142434 | 238.7671287 | 11.84225965 | 8.95E-20    | 20.16229468 |
| EXOSC4     | NM_019037    | 255.5253465 | 52.53379641 | 1.70E-10    | 4.864018289 |
| AACS       | NM_023928    | 227.5648751 | 8.083378495 | 4.97E-20    | 28.15219839 |
| RNPEP      | NM_020216    | 201.6703536 | 10.30300212 | 1.11E-16    | 19.5739408  |
| H2AFZ      | NM_002106    | 211.5186893 | 28.08438649 | 4.01E-12    | 7.531540324 |
| PRMT3      | NM_001145166 | 165.0549929 | 2.959916268 | 2.73E-16    | 55.76339936 |
| SETDB2     | NM_031915    | 220.8154644 | 3.252892225 | 3.84E-22    | 67.88280986 |
| HNRNPA1    | NM_002136    | 236.5407072 | 33.26736097 | 1.64E-13    | 7.110293704 |
| APOL2      | NM_145637    | 59.73190005 | 8.582986302 | 0.000327239 | 6.959337688 |
| ASRGL1     | NM_001083926 | 162.9890429 | 5.616121113 | 5.60E-15    | 29.0216396  |
| FBXW4      | NM_022039    | 124.3077322 | 11.78677327 | 3.63E-09    | 10.5463751  |
| SMURF1     | NM_001199847 | 67.51428571 | 6.059424061 | 2.19E-05    | 11.14203017 |
| F2R        | NM_001992    | 98.41321075 | 4.280356641 | 5.41E-09    | 22.99182498 |
| PRR12      | NM_020719    | 73.55166431 | 11.94416524 | 0.000104352 | 6.157957701 |
| MBNL2      | NM_144778    | 48.85058935 | 4.516191694 | 0.001414009 | 10.81676613 |
| APEH       | NM_001640    | 151.0747572 | 29.03780688 | 1.94E-07    | 5.202691712 |
| TIGD4      | NM_145720    | 159.0176143 | 4.299274646 | 5.45E-17    | 36.98707978 |
| HAS2-AS1   | NR_002835    | 83.56047148 | 15.37571334 | 0.000211536 | 5.434575271 |
| HTT        | NM_002111    | 80.46154644 | 6.260835063 | 2.00E-06    | 12.85156782 |
| PPP3CC     | NM_001243975 | 183.8791608 | 3.72245769  | 6.59E-17    | 49.39724668 |
| ZFYVE21    | NM_024071    | 78.55606789 | 13.8466266  | 0.000162374 | 5.673300087 |
| BCAR3      | NM_001261408 | 54.72749646 | 7.260804395 | 0.001710959 | 7.537387524 |
| TAF3       | NM_031923    | 202.8638001 | 4.778187834 | 2.63E-18    | 42.4562213  |

|          |              |             |             |             |             |
|----------|--------------|-------------|-------------|-------------|-------------|
| C1orf52  | NR_024113    | 149.1692786 | 7.11226764  | 1.34E-13    | 20.97351874 |
| TCHP     | NM_032300    | 58.85939651 | 8.770280118 | 0.000374642 | 6.711233361 |
| C16orf71 | NM_139170    | 87.53190005 | 18.89382713 | 0.000163251 | 4.632830578 |
| TMEM115  | NM_007024    | 141.06595   | 22.82078668 | 1.20E-07    | 6.18146745  |
| STK3     | NM_001256313 | 210.6461858 | 4.584605324 | 6.53E-19    | 45.94641651 |
| RPUSD2   | NM_152260    | 107.3890429 | 16.98900882 | 2.83E-06    | 6.321089361 |
| ZNF706   | NM_016096    | 144.1648751 | 12.41457713 | 9.91E-11    | 11.61254818 |
| RNF168   | NM_152617    | 209.6132108 | 6.158627763 | 2.84E-19    | 34.03570062 |
| ZMAT3    | NM_152240    | 114.298925  | 3.885501534 | 3.55E-10    | 29.41677516 |
| CCZ1     | NM_015622    | 175.9363036 | 6.768822054 | 4.34E-16    | 25.99215967 |
| PHF20L1  | NM_016018    | 105.6440358 | 3.642553161 | 3.73E-10    | 29.00274373 |
| GSG2     | NM_031965    | 125.3407072 | 21.08312731 | 1.45E-06    | 5.945071875 |
| SH3D21   | NM_001162530 | 86.49892504 | 19.27993573 | 0.000274755 | 4.486473723 |
| PGRMC1   | NM_001282621 | 137.0945215 | 7.707957666 | 1.35E-11    | 17.78610202 |
| SCYL3    | NM_020423    | 63.8638001  | 6.899906443 | 0.000259683 | 9.255748701 |
| NSDHL    | NM_015922    | 62.67035361 | 4.154521563 | 4.83E-05    | 15.08485457 |
| RPS2     | NM_002952    | 352.7451108 | 71.84245443 | 9.43E-15    | 4.909981342 |
| POMT2    | NM_013382    | 157.9846393 | 8.654479982 | 2.87E-13    | 18.25466575 |
| ZNF691   | NM_015911    | 108.4220179 | 17.56931459 | 3.46E-06    | 6.171101175 |
| ERGIC2   | NM_016570    | 64.73630363 | 2.212474976 | 2.50E-06    | 29.25967721 |
| EMP1     | NM_001423    | 57.66595002 | 7.080292201 | 0.000658366 | 8.144572058 |
| MMAB     | NM_052845    | 143.1319    | 9.354951112 | 1.47E-11    | 15.30012272 |
| RSAD1    | NM_018346    | 150.3627251 | 20.42791966 | 2.01E-09    | 7.36064796  |
| SERPINH1 | NM_001235    | 107.3890429 | 26.18701923 | 7.40E-05    | 4.100850195 |
| DMXL1    | NM_005509    | 109.4549929 | 1.398485269 | 1.73E-10    | 78.26681866 |
| NUP153   | NM_001278210 | 207.5472607 | 6.905852495 | 4.61E-18    | 30.05382187 |
| SSR2     | NM_003145    | 91.34285714 | 12.74500995 | 6.38E-06    | 7.166950633 |
| RRP1     | NM_003683    | 148.1363036 | 12.33593057 | 1.99E-11    | 12.00852281 |
| ZNF638   | NM_001252613 | 195.7934465 | 4.829795522 | 3.99E-18    | 40.53866165 |
| SLC25A13 | NR_027662    | 119.3033286 | 4.957709496 | 3.09E-10    | 24.06420318 |
| CENPQ    | NM_018132    | 84.59344649 | 2.364051954 | 9.02E-09    | 35.7832434  |
| RDH10    | NM_172037    | 298.1780858 | 10.05526399 | 3.95E-26    | 29.65392913 |
| RGS16    | NM_002928    | 246.3890429 | 5.202506208 | 1.01E-26    | 47.35968264 |
| TTLL1    | NM_012263    | 111.520943  | 8.87725255  | 9.50E-09    | 12.56255157 |
| ZNF22    | NM_006963    | 41.78023574 | 5.49643825  | 0.004658845 | 7.601329049 |
| KLC1     | NM_005552    | 184.9121358 | 8.213855547 | 5.19E-16    | 22.51222154 |
| ZNF214   | NM_013249    | 50.91653937 | 1.482281396 | 3.27E-05    | 34.35011699 |
| EIF1AD   | NM_001242484 | 255.3648751 | 14.83993616 | 2.93E-21    | 17.2079497  |
| ZNF136   | NM_003437    | 96.5077322  | 0.944369835 | 1.30E-11    | 102.1927306 |
| UBXN8    | NM_001282189 | 73.55166431 | 6.84733843  | 1.75E-05    | 10.74164291 |
| PEX11G   | NM_001270539 | 165.0549929 | 19.01069215 | 6.78E-11    | 8.682219019 |
| SSPO     | NM_198455    | 45.75166431 | 4.983669833 | 0.002286117 | 9.18031608  |
| DGCR14   | NM_022719    | 145.1978501 | 16.25259183 | 1.34E-09    | 8.933827392 |
| INCENP   | NM_020238    | 70.61321075 | 10.79578999 | 0.000169442 | 6.540809962 |
| ACAD10   | NM_001136538 | 127.4066572 | 7.072947817 | 2.34E-10    | 18.01323303 |
| CASC5    | NM_144508    | 162.9890429 | 3.929618649 | 4.15E-15    | 41.47706368 |
| KCTD6    | NM_001128214 | 42.81321075 | 1.999542909 | 0.000213936 | 21.41149887 |
| CLN6     | NM_017882    | 108.4220179 | 9.503237411 | 5.18E-08    | 11.40895605 |
| ARRDC4   | NM_183376    | 52.82201792 | 6.061391539 | 0.001646199 | 8.714503523 |
| TLDC1    | NM_020947    | 120.4967751 | 13.19915752 | 3.30E-08    | 9.129126226 |
| NSUN3    | NM_022072    | 91.50332862 | 2.98471335  | 8.57E-09    | 30.65732547 |
| NSL1     | NM_001297737 | 226.5319    | 5.378073352 | 1.97E-21    | 42.12138534 |
| MFS11    | NM_001242534 | 80.62201792 | 15.4768704  | 0.000359441 | 5.209193837 |
| ZNF644   | NM_032186    | 180.9407072 | 4.557065911 | 2.09E-16    | 39.7055278  |
| TTI1     | NM_014657    | 106.3560679 | 7.956192878 | 3.15E-08    | 13.36770859 |
| KANSL2   | NM_017822    | 337.7319    | 9.058243476 | 5.73E-31    | 37.28448026 |
| SLC35B1  | NM_005827    | 162.9890429 | 16.10248073 | 1.72E-11    | 10.12198342 |
| AIMP1    | NM_004757    | 66.80225365 | 7.02210947  | 0.000135772 | 9.513131907 |
| CNOT3    | NM_014516    | 69.74070721 | 15.55960981 | 0.002216765 | 4.482162988 |
| PPIEL    | NR_003929    | 133.1230929 | 10.84304369 | 3.33E-10    | 12.27728087 |
| TRNP1    | NM_001013642 | 254.1714286 | 32.77472634 | 2.76E-15    | 7.755104526 |
| GRPEL2   | NM_152407    | 172.9978501 | 15.81822025 | 2.70E-12    | 10.93661912 |

|           |              |             |             |             |             |
|-----------|--------------|-------------|-------------|-------------|-------------|
| ZNF579    | NM_152600    | 61.6373786  | 10.25601163 | 0.001576518 | 6.009877995 |
| TMEM167A  | NM_174909    | 140.353918  | 3.754878364 | 6.86E-14    | 37.37908512 |
| CSNK1G1   | NM_022048    | 73.71213579 | 4.667676614 | 6.68E-06    | 15.79204    |
| CHD4      | NM_001273    | 190.7890429 | 12.56128548 | 7.49E-15    | 15.18865591 |
| SYAP1     | NM_032796    | 161.9560679 | 3.362239367 | 7.58E-16    | 48.16910702 |
| TRMT44    | NM_152544    | 123.4352287 | 10.0772186  | 3.66E-09    | 12.24893828 |
| DYNLL2    | NM_080677    | 96.34726073 | 23.26181945 | 0.000152662 | 4.141862631 |
| CAMK1G    | NM_020439    | 45.75166431 | 6.252747804 | 0.002116738 | 7.317049358 |
| MTMR9     | NM_015458    | 244.3230929 | 5.721795059 | 4.83E-23    | 42.70042711 |
| ZNF721    | NM_133474    | 120.3363036 | 9.868966916 | 9.53E-09    | 12.1934043  |
| ZNF675    | NM_138330    | 89.59785007 | 2.073412037 | 4.25E-09    | 43.21275678 |
| FAM151B   | NM_205548    | 101.5121358 | 4.715643694 | 6.59E-09    | 21.52667639 |
| TOB1      | NM_005749    | 399.3692786 | 14.90418697 | 8.53E-37    | 26.79577755 |
| NXT2      | NM_001242617 | 115.3319    | 4.291158186 | 1.72E-11    | 26.87663681 |
| ZMYM6     | NM_007167    | 50.91653937 | 3.918266024 | 0.000121757 | 12.99466117 |
| LOH12CR2  | NR_024061    | 54.0154644  | 5.852764968 | 0.001794279 | 9.229050662 |
| FAM228B   | NR_111929    | 114.298925  | 9.055593552 | 6.97E-09    | 12.62191422 |
| HAUS4     | NM_001166270 | 217.5560679 | 11.92688    | 1.40E-18    | 18.24081972 |
| TRAPPC8   | NM_014939    | 105.4835644 | 3.751465679 | 5.43E-10    | 28.11796066 |
| FKBP14    | NM_017946    | 108.4220179 | 5.120062308 | 1.89E-09    | 21.17591767 |
| RNF219    | NM_024546    | 100.3186893 | 5.96787927  | 1.33E-08    | 16.80977191 |
| SUGT1     | NM_006704    | 100.4791608 | 4.534740877 | 7.76E-09    | 22.15764108 |
| WDR53     | NM_182627    | 108.4220179 | 10.76433591 | 1.52E-07    | 10.07233691 |
| EXOC5     | NM_006544    | 146.0703536 | 2.736509004 | 9.31E-15    | 53.37835666 |
| UHRF1BP1L | NM_015054    | 183.8791608 | 3.286982594 | 4.01E-18    | 55.94162899 |
| EXOC4     | NM_021807    | 85.46595002 | 3.243995981 | 8.45E-08    | 26.34588653 |
| PTGFRN    | NM_020440    | 58.69892504 | 5.579535982 | 0.000125535 | 10.52039546 |
| GJA3      | NM_021954    | 98.41321075 | 5.836755768 | 7.69E-08    | 16.86094376 |
| SMPDL3B   | NM_001009568 | 55.92094295 | 6.508783097 | 0.000654366 | 8.591612613 |
| ZNF776    | NM_173632    | 78.55606789 | 11.61351593 | 0.000112219 | 6.764193407 |
| ZNF208    | NM_007153    | 19.85714286 | 0.042949408 | 0.004489335 | 462.3379829 |
| HTR7P1    | NR_002774    | 295.9516643 | 20.83136105 | 1.19E-22    | 14.20702486 |
| CCBL1     | NM_001122671 | 47.81761433 | 5.819787413 | 0.001267201 | 8.216385057 |
| ATP2C2    | NM_001286527 | 155.2066572 | 10.64372206 | 8.78E-12    | 14.5819908  |
| UBOX5     | NM_199415    | 128.2791608 | 6.161052263 | 2.03E-11    | 20.82098241 |
| FANCC     | NM_001243744 | 115.3319    | 5.307575075 | 1.13E-09    | 21.72967851 |
| RAB17     | NR_033308    | 134.1560679 | 8.752506644 | 6.85E-11    | 15.32773106 |
| TET1      | NM_030625    | 138.1274965 | 3.590767141 | 3.69E-13    | 38.46740572 |
| CHMP3     | NR_036454    | 119.3033286 | 5.144440891 | 1.43E-10    | 23.19072785 |
| PURA      | NM_005859    | 36.77583215 | 1.683001747 | 0.000364803 | 21.85133332 |
| ACTN4     | NM_004924    | 196.66595   | 12.87113295 | 5.89E-15    | 15.27961453 |
| SNRNP25   | NM_024571    | 115.3319    | 8.749478847 | 2.83E-09    | 13.18157368 |
| GPR37     | NM_005302    | 55.76047148 | 4.34856251  | 0.000125595 | 12.82273656 |
| TCP11L1   | NM_018393    | 84.59344649 | 10.02380204 | 9.80E-06    | 8.439257491 |
| TMA16     | NM_018352    | 246.3890429 | 6.090343038 | 3.93E-24    | 40.45569213 |
| WDR11     | NM_018117    | 244.8045073 | 4.761935463 | 5.73E-24    | 51.4086151  |
| ANKZF1    | NM_001282792 | 103.4176143 | 18.12757133 | 1.51E-05    | 5.704990064 |
| ALS2CL    | NM_001190707 | 264.1802357 | 11.97838738 | 1.32E-22    | 22.05474137 |
| EXOC6B    | NM_015189    | 151.2352287 | 2.764450709 | 3.00E-14    | 54.70715328 |
| FANK1     | NM_145235    | 86.10783593 | 6.914526566 | 2.98E-06    | 12.45317884 |
| ZNF23     | NM_145911    | 175.9363036 | 8.611455886 | 8.28E-16    | 20.43049468 |
| AQP3      | NM_004925    | 72.5186893  | 14.51134392 | 0.000776181 | 4.997379272 |
| KIAA1324L | NM_001291991 | 73.55166431 | 2.612279767 | 8.25E-07    | 28.15612065 |
| DMXL2     | NM_015263    | 198.7319    | 2.600554548 | 1.15E-19    | 76.41904694 |
| OTUD3     | NM_015207    | 144.3253465 | 8.146033467 | 1.97E-12    | 17.71725431 |
| SMARCD2   | NM_001098426 | 150.2022537 | 31.47116644 | 2.52E-07    | 4.772694204 |
| RINT1     | NM_021930    | 161.9560679 | 6.092956771 | 2.33E-14    | 26.58086607 |
| PSMA4     | NM_001102668 | 220.6549929 | 9.866707127 | 5.02E-20    | 22.36359001 |
| CIAO1     | NM_004804    | 103.5780858 | 13.45540021 | 1.22E-06    | 7.697882205 |
| BPHL      | NR_026650    | 164.8945215 | 9.0270843   | 1.93E-13    | 18.26664247 |
| TULP3     | NM_001160408 | 177.8417822 | 7.340224316 | 2.49E-15    | 24.2283852  |
| RSRC2     | NR_036434    | 234.4747572 | 8.31769273  | 2.03E-21    | 28.18987967 |

|              |              |             |             |             |             |
|--------------|--------------|-------------|-------------|-------------|-------------|
| TMCO1        | NM_001256165 | 92.53630363 | 4.639444956 | 7.93E-08    | 19.9455548  |
| REEP5        | NM_005669    | 110.3274965 | 9.09613077  | 9.15E-09    | 12.12905787 |
| ARAP2        | NM_015230    | 52.66154644 | 1.658058477 | 0.000139345 | 31.76097054 |
| SND1         | NM_014390    | 255.3648751 | 8.3524582   | 1.06E-21    | 30.57361904 |
| STOML2       | NM_001287033 | 223.5934465 | 21.5895528  | 6.33E-15    | 10.35655757 |
| MYLIP        | NM_013262    | 347.7407072 | 9.281370065 | 7.32E-34    | 37.46652755 |
| IMMT         | NM_001100169 | 96.5077322  | 10.69860523 | 1.13E-06    | 9.020590082 |
| STXBP4       | NM_178509    | 136.2220179 | 2.636109131 | 3.92E-13    | 51.67540916 |
| NCOA5        | NM_020967    | 189.9165394 | 9.938395299 | 7.80E-16    | 19.10937668 |
| COQ4         | NM_016035    | 174.9033286 | 16.39804413 | 1.40E-12    | 10.66610915 |
| SLC37A2      | NM_001145290 | 49.72309288 | 7.705031558 | 0.004144798 | 6.453327609 |
| BCL10        | NM_003921    | 66.64178218 | 12.76015163 | 0.001122736 | 5.222648139 |
| TRAM1        | NM_014294    | 168.153918  | 7.228462067 | 8.65E-15    | 23.26275166 |
| GJB3         | NM_024009    | 121.3692786 | 25.2295344  | 1.03E-05    | 4.810603189 |
| LPAR1        | NM_001401    | 59.73190005 | 2.911313061 | 2.22E-05    | 20.5171683  |
| ZNF770       | NM_014106    | 274.0285714 | 6.586492404 | 5.68E-28    | 41.60462878 |
| ETS1         | NM_005238    | 127.2461858 | 5.768320892 | 2.34E-11    | 22.05948458 |
| MGC72080     | NR_002822    | 180.7802357 | 2.929616056 | 5.63E-21    | 61.70782529 |
| SNHG15       | NR_003697    | 303.1824894 | 22.74614202 | 1.58E-22    | 13.32896318 |
| DNAJC9       | NM_015190    | 229.6308251 | 23.83616407 | 4.66E-15    | 9.633715578 |
| YWHAB        | NM_139323    | 86.65939651 | 7.272361431 | 1.42E-06    | 11.91626645 |
| CEP192       | NM_032142    | 272.1230929 | 5.492281474 | 2.97E-25    | 49.54645791 |
| TOMM6        | NM_001134493 | 166.0879679 | 28.08570894 | 3.80E-08    | 5.913611377 |
| TEX30        | NM_001286775 | 274.3495144 | 10.10080297 | 2.11E-25    | 27.1611589  |
| TSNAX        | NM_005999    | 167.120943  | 6.698535803 | 1.70E-14    | 24.94887657 |
| GNPAT        | NM_014236    | 223.432975  | 6.614866586 | 1.32E-20    | 33.77739704 |
| MRPS22       | NM_020191    | 162.1165394 | 16.29331962 | 2.51E-11    | 9.949877812 |
| PLEKHF1      | NM_024310    | 112.553918  | 4.45851584  | 1.26E-10    | 25.24470519 |
| HIST2H2BA    | NR_027337    | 49.72309288 | 3.739495812 | 0.000415745 | 13.29673715 |
| IRGQ         | NM_001007561 | 133.2835644 | 11.90674611 | 3.33E-10    | 11.19395368 |
| TTC26        | NM_001287512 | 67.83522867 | 4.639372103 | 1.72E-05    | 14.62163999 |
| RPN1         | NM_002950    | 155.0461858 | 10.1285659  | 2.72E-12    | 15.30781232 |
| ZNF483       | NM_001007169 | 73.71213579 | 7.529389066 | 2.71E-05    | 9.789922547 |
| COG8         | NM_032382    | 173.8703536 | 35.15579488 | 3.10E-08    | 4.945709639 |
| DPH7         | NM_138778    | 132.5715323 | 7.74661294  | 3.52E-11    | 17.11348344 |
| GLCE         | NM_015554    | 181.1011787 | 2.98613779  | 7.23E-18    | 60.64729475 |
| FAM175A      | NM_139076    | 163.8615464 | 8.129970384 | 1.36E-13    | 20.15524519 |
| MRPL4        | NM_146388    | 142.2593965 | 17.09666885 | 3.33E-09    | 8.320883895 |
| TFIP11       | NM_012143    | 141.2264215 | 10.72590647 | 2.18E-10    | 13.16685185 |
| WDR41        | NM_018268    | 117.5583215 | 3.425403532 | 1.65E-11    | 34.31955402 |
| ACTA2        | NM_001141945 | 65.76927864 | 7.04220488  | 0.000157849 | 9.339302075 |
| LOC100499484 | NR_036526    | 215.6505893 | 5.083807755 | 1.96E-20    | 42.41910783 |
| FAM86FP      | NR_024254    | 73.71213579 | 14.99867924 | 0.000676655 | 4.914575117 |
| MCM10        | NM_018518    | 184.7516643 | 7.53635838  | 3.40E-16    | 24.51471321 |
| SAFB2        | NM_014649    | 138.1274965 | 15.36010141 | 5.25E-09    | 8.992616179 |
| ERCC3        | NM_000122    | 160.0505893 | 6.225053354 | 5.37E-14    | 25.71071768 |
| RRAGB        | NM_016656    | 78.55606789 | 1.916161166 | 1.09E-07    | 40.99658698 |
| SLC41A1      | NM_173854    | 107.3890429 | 8.442962089 | 8.95E-09    | 12.71935628 |
| ZDHHC3       | NM_001135179 | 137.2549929 | 9.953606085 | 2.49E-10    | 13.78947406 |
| ZNF273       | NM_021148    | 133.2835644 | 5.120986438 | 1.25E-12    | 26.02693172 |
| NIPAL3       | NM_020448    | 64.73630363 | 5.381327256 | 3.36E-05    | 12.02980242 |
| VIMP         | NM_018445    | 117.3978501 | 11.15388329 | 9.86E-09    | 10.52528944 |
| ABCA7        | NM_019112    | 181.9736822 | 23.57771302 | 3.27E-11    | 7.718037882 |
| DCAF13       | NM_015420    | 135.3495144 | 7.805845361 | 2.48E-11    | 17.33950753 |
| AGBL3        | NM_178563    | 186.6571429 | 1.95033009  | 1.32E-18    | 95.70541101 |
| STX7         | NM_003569    | 93.56927864 | 4.157754334 | 4.46E-08    | 22.50476366 |
| ZFP91-CNTF   | NR_024091    | 41.78023574 | 3.795127229 | 0.000856931 | 11.0089157  |
| MALSU1       | NM_138446    | 131.2176143 | 15.46776036 | 1.53E-08    | 8.483297601 |
| ORC2         | NR_033915    | 135.1890429 | 4.393141105 | 3.33E-12    | 30.77275227 |
| UBA6         | NM_018227    | 154.0132108 | 3.225909045 | 2.73E-15    | 47.74257693 |
| LPAR2        | NM_004720    | 83.72094295 | 15.9938504  | 0.000159891 | 5.234570841 |
| BMI1         | NM_005180    | 89.4373786  | 7.080030109 | 2.39E-07    | 12.63234439 |

|              |              |             |             |             |             |
|--------------|--------------|-------------|-------------|-------------|-------------|
| AKAP12       | NM_005100    | 65.76927864 | 4.742445689 | 3.88E-05    | 13.86821968 |
| LAMA3        | NM_001127718 | 63.70332862 | 5.354497111 | 6.81E-05    | 11.89716369 |
| ATR          | NM_001184    | 158.1451108 | 3.891305037 | 4.31E-14    | 40.6406358  |
| FLRT3        | NM_198391    | 22.95606789 | 0.539355214 | 0.004373483 | 42.56205795 |
| HECTD3       | NM_024602    | 129.3121358 | 15.25968752 | 2.10E-08    | 8.474101165 |
| CCDC53       | NM_001301107 | 78.71653937 | 1.484763531 | 4.58E-08    | 53.01621285 |
| KIAA1751     | NM_001080484 | 68.7077322  | 4.495265962 | 1.60E-05    | 15.28446432 |
| DNAJC2       | NM_001129887 | 181.8132108 | 8.557376792 | 2.76E-15    | 21.24637201 |
| LOC100507291 | NR_121608    | 92.53630363 | 4.14120745  | 8.58E-08    | 22.34524707 |
| MTF1         | NM_005955    | 84.75391796 | 8.520539917 | 2.50E-06    | 9.947012607 |
| SNAI3-AS1    | NR_024402    | 244.3230929 | 20.38814732 | 4.98E-18    | 11.98358483 |
| OGFRL1       | NM_024576    | 100.3186893 | 5.552168774 | 1.34E-08    | 18.06837893 |
| THSD4        | NM_024817    | 47.65714286 | 4.041078183 | 0.000313162 | 11.79317516 |
| CCDC84       | NR_104051    | 102.3846393 | 23.01332376 | 9.87E-05    | 4.44892882  |
| AMZ2P1       | NR_026903    | 213.9055823 | 19.72810797 | 8.68E-15    | 10.84268104 |
| RBM28        | NM_001166135 | 232.5692786 | 6.402410813 | 8.76E-22    | 36.32526644 |
| SEPSECS      | NM_016955    | 81.65499293 | 4.460729826 | 5.28E-07    | 18.30529893 |
| PPP4R4       | NM_020958    | 59.57142857 | 2.447839838 | 1.38E-05    | 24.33632611 |
| ANKRD40      | NM_052855    | 70.61321075 | 12.4130503  | 0.000425618 | 5.688626811 |
| CRKL         | NM_005207    | 108.5824894 | 7.932742915 | 1.30E-08    | 13.6878871  |
| THNSL1       | NM_024838    | 150.0417822 | 10.71218323 | 2.32E-12    | 14.00664822 |
| POLA2        | NM_002689    | 200.7978501 | 8.965681273 | 6.85E-17    | 22.39627352 |
| RWDD2A       | NM_033411    | 205.6417822 | 20.59484273 | 7.38E-14    | 9.985110588 |
| DSP          | NM_001008844 | 163.8615464 | 6.389152664 | 4.37E-14    | 25.64683536 |
| ATPIF1       | NM_178190    | 253.4593965 | 35.45735565 | 1.27E-13    | 7.148288185 |
| WDFY1        | NM_020830    | 74.7451108  | 5.847054967 | 5.63E-06    | 12.78337748 |
| ITM2B        | NM_021999    | 227.4044036 | 4.847616146 | 1.93E-22    | 46.9105632  |
| PVRL2        | NM_002856    | 66.64178218 | 10.04675036 | 0.000520197 | 6.633167918 |
| ST6GALNAC3   | NM_152996    | 43.84618576 | 3.365097464 | 0.001062757 | 13.02969267 |
| TSNAXIP1     | NM_001288994 | 107.3890429 | 8.74216065  | 4.34E-08    | 12.28403906 |
| ZNF79        | NM_001286696 | 152.2682037 | 12.89061968 | 2.35E-11    | 11.81232613 |
| TMED4        | NM_182547    | 229.4703536 | 30.93840737 | 8.64E-13    | 7.417006017 |
| CMC4         | NM_001018024 | 59.57142857 | 4.649470842 | 3.10E-05    | 12.81251794 |
| OPHN1        | NM_002547    | 82.52749646 | 1.634562871 | 1.30E-07    | 50.48903162 |
| TSPAN15      | NM_012339    | 141.2264215 | 8.342317621 | 1.72E-11    | 16.92891927 |
| BIN3         | NM_018688    | 109.2945215 | 11.09901754 | 1.03E-07    | 9.847224864 |
| DLL4         | NM_019074    | 262.2747572 | 15.19543366 | 8.22E-22    | 17.26010346 |
| EID1         | NM_014335    | 169.0264215 | 9.645922526 | 6.36E-14    | 17.52309549 |
| JAK1         | NM_002227    | 73.55166431 | 7.654785965 | 3.26E-05    | 9.608585353 |
| PTRF         | NM_012232    | 202.7033286 | 11.72662467 | 1.14E-16    | 17.28573518 |
| BDKRB2       | NM_000623    | 56.63297501 | 5.796137257 | 0.000197281 | 9.770813301 |
| RPL21P28     | NR_026911    | 164.8945215 | 16.0811337  | 9.07E-12    | 10.25391148 |
| PARP2        | NM_001042618 | 549.2505893 | 12.15865694 | 8.44E-57    | 45.17362338 |
| TBPL1        | NM_001253676 | 105.3230929 | 8.04047356  | 2.45E-08    | 13.09911563 |
| ZNF767P      | NR_027788    | 164.0220179 | 8.926584983 | 1.47E-13    | 18.37455401 |
| ST3GAL4-AS1  | NR_033839    | 117.2373786 | 12.43487284 | 2.60E-08    | 9.428112383 |
| FAM60A       | NM_001135811 | 187.8505893 | 7.215936119 | 1.32E-16    | 26.03274007 |
| TANGO6       | NM_024562    | 157.9846393 | 4.079449938 | 7.72E-14    | 38.72694646 |
| BRWD1        | NM_001007246 | 126.2132108 | 5.439647168 | 3.00E-11    | 23.20246274 |
| DLG1-AS1     | NR_038289    | 167.9934465 | 23.68222953 | 3.70E-10    | 7.093649956 |
| TJAP1        | NM_001146016 | 121.2088072 | 14.89970675 | 1.48E-07    | 8.134979381 |
| PHACTR4      | NM_023923    | 47.97808581 | 6.433494193 | 0.001332212 | 7.457547076 |
| NINJ1        | NM_004148    | 237.4132108 | 15.46226114 | 2.72E-18    | 15.35436561 |
| IFT81        | NM_001143779 | 73.71213579 | 3.481442759 | 7.50E-07    | 21.17287024 |
| RFTN1        | NM_015150    | 46.78463932 | 4.874425759 | 0.002539278 | 9.597979667 |
| PDZD8        | NM_173791    | 96.66820368 | 4.379256517 | 3.41E-08    | 22.07411311 |
| ATG9A        | NM_024085    | 110.3274965 | 12.86582252 | 2.53E-07    | 8.575238486 |
| FAM122B      | NM_001170756 | 69.58023574 | 4.254290622 | 1.04E-05    | 16.35530854 |
| UNC50        | NM_014044    | 179.9077322 | 16.34101367 | 1.02E-12    | 11.00958214 |
| PRPF39       | NM_017922    | 227.5648751 | 4.55508469  | 1.65E-23    | 49.958429   |
| GCC1         | NM_024523    | 222.720943  | 23.14925093 | 8.14E-15    | 9.621086386 |
| F2RL1        | NM_005242    | 213.7451108 | 8.283952298 | 6.78E-20    | 25.80231067 |

|              |              |             |             |             |             |
|--------------|--------------|-------------|-------------|-------------|-------------|
| TSPYL2       | NM_022117    | 155.0461858 | 6.358262432 | 8.23E-15    | 24.38499314 |
| OPLAH        | NM_017570    | 66.80225365 | 11.5035728  | 0.000968718 | 5.807087486 |
| HMG20B       | NM_006339    | 152.9802357 | 34.36809421 | 5.25E-07    | 4.451228363 |
| ALG2         | NM_033087    | 252.4264215 | 11.22442622 | 8.96E-23    | 22.48902674 |
| TMEM70       | NM_017866    | 322.0066572 | 15.16303193 | 4.98E-28    | 21.23629751 |
| TSHZ1        | NM_005786    | 43.84618576 | 3.588636524 | 0.000935775 | 12.21806262 |
| GTF2E1       | NM_005513    | 70.77368223 | 4.773141981 | 7.70E-06    | 14.82748314 |
| LOC100996348 | NR_121631    | 159.0176143 | 6.888023404 | 1.85E-14    | 23.0861025  |
| BCKDHB       | NM_183050    | 255.3648751 | 3.418375129 | 1.06E-24    | 74.70358443 |
| ZBTB3        | NM_024784    | 139.1604715 | 19.3314024  | 2.08E-08    | 7.198674396 |
| XPOT         | NM_007235    | 71.64618576 | 6.933435171 | 4.53E-05    | 10.33343271 |
| RARA         | NM_001145302 | 90.47035361 | 15.47722189 | 4.45E-05    | 5.845387129 |
| LOC101927621 | NR_110708    | 141.06595   | 15.39724201 | 9.82E-09    | 9.161767411 |
| ZDHHC24      | NM_207340    | 118.2703536 | 29.08370484 | 7.05E-05    | 4.06655047  |
| NOC4L        | NM_024078    | 85.46595002 | 6.007286209 | 2.09E-07    | 14.22704813 |
| LOH12CR1     | NM_001300742 | 170.219868  | 4.291674686 | 1.46E-15    | 39.66280775 |
| STX8         | NR_033656    | 90.63082508 | 4.393499111 | 1.76E-07    | 20.62839272 |
| SERTAD3      | NM_203344    | 200.6373786 | 27.49254721 | 2.84E-11    | 7.297882478 |
| EXOSC10      | NM_001001998 | 169.0264215 | 9.158411136 | 9.46E-14    | 18.4558674  |
| POLR2J4      | NR_003655    | 149.1692786 | 11.4518519  | 2.76E-11    | 13.02577783 |
| EIF4G2       | NM_001418    | 216.8440358 | 16.50009812 | 3.27E-16    | 13.14198463 |
| GTSF1        | NM_144594    | 160.0505893 | 5.926921373 | 4.65E-15    | 27.00400078 |
| UBXN2B       | NM_001077619 | 146.0703536 | 3.014755749 | 2.91E-15    | 48.45180365 |
| GRWD1        | NM_031485    | 87.53190005 | 17.60652306 | 0.000105274 | 4.97156081  |
| GMCL1        | NM_178439    | 120.4967751 | 4.026128417 | 8.26E-11    | 29.92869641 |
| TAF2         | NM_003184    | 209.7736822 | 4.964030295 | 2.87E-19    | 42.25874335 |
| PADI2        | NM_007365    | 60.60440358 | 8.329801001 | 0.000505165 | 7.275612416 |
| IREB2        | NM_004136    | 138.1274965 | 5.359462536 | 2.88E-12    | 25.77263961 |
| CHM          | NM_001145414 | 43.84618576 | 2.300943639 | 0.000861116 | 19.05574088 |
| MRPS30       | NM_016640    | 129.3121358 | 9.069023641 | 1.06E-10    | 14.25866123 |
| SOCS3        | NM_003955    | 113.4264215 | 23.4318705  | 1.23E-05    | 4.840690012 |
| C16orf70     | NM_025187    | 165.0549929 | 9.172350751 | 2.42E-13    | 17.99484095 |
| OVOL1        | NM_004561    | 64.73630363 | 11.13930331 | 0.000994978 | 5.811521765 |
| MRPS17       | NM_015969    | 191.6615464 | 14.17757932 | 8.16E-15    | 13.51863686 |
| GGPS1        | NM_001037277 | 80.46154644 | 8.54530853  | 1.85E-05    | 9.415873769 |
| PIM1         | NM_001243186 | 110.3274965 | 15.19659355 | 1.16E-06    | 7.260014959 |
| STAU1        | NM_017452    | 152.9802357 | 6.358568086 | 7.84E-14    | 24.0589129  |
| PPIC         | NM_000943    | 192.8549929 | 15.34738661 | 3.13E-14    | 12.56598259 |
| COIL         | NM_004645    | 164.1824894 | 7.775316313 | 1.02E-13    | 21.11585983 |
| UQCRH        | NM_001297565 | 113.4264215 | 12.99180382 | 4.86E-08    | 8.730613782 |
| LPAR5        | NM_020400    | 74.7451108  | 9.27587893  | 6.99E-05    | 8.05800845  |
| PLA2G7       | NM_001168357 | 67.83522867 | 6.0879334   | 1.46E-05    | 11.14257076 |
| PRICKLE3     | NM_006150    | 107.2285714 | 21.49663473 | 9.44E-06    | 4.988156183 |
| GAA          | NM_001079804 | 103.4176143 | 18.715103   | 1.25E-05    | 5.525890738 |
| SETD8        | NM_020382    | 58.85939651 | 12.1553711  | 0.001508292 | 4.842254181 |
| RPL37        | NM_000997    | 217.7165394 | 24.52560711 | 4.44E-14    | 8.877111109 |
| PTCD1        | NM_015545    | 143.2923715 | 15.34269386 | 1.01E-09    | 9.339453219 |
| CCSAP        | NM_145257    | 111.2       | 13.28212971 | 1.65E-07    | 8.372151336 |
| PPP1R2       | NM_001291504 | 217.5560679 | 7.662533609 | 3.46E-19    | 28.39218449 |
| ZNF213       | NM_001134655 | 165.9274965 | 14.29232793 | 1.72E-12    | 11.60955005 |
| RPS26        | NM_001029    | 228.5978501 | 51.42012499 | 4.63E-09    | 4.445688339 |
| ABHD3        | NM_138340    | 205.6417822 | 7.297833854 | 3.53E-18    | 28.17846861 |
| C8orf44-SGK3 | NM_001204173 | 102.5451108 | 6.809956282 | 1.44E-08    | 15.05811587 |
| DHX34        | NM_014681    | 144.1648751 | 8.661187041 | 3.27E-11    | 16.64493266 |
| TMEM216      | NM_016499    | 171.9648751 | 15.73573182 | 1.40E-12    | 10.92830489 |
| TAX1BP1      | NM_006024    | 174.9033286 | 3.270097478 | 2.21E-17    | 53.48566205 |
| POP5         | NM_015918    | 189.7560679 | 24.58613475 | 7.56E-11    | 7.718011385 |
| NAGPA-AS1    | NR_038913    | 98.57368223 | 12.86203303 | 2.66E-06    | 7.663927    |
| THUMPD3      | NM_015453    | 209.6132108 | 11.87746248 | 4.58E-17    | 17.6479792  |
| NUP85        | NM_024844    | 199.7648751 | 16.00971855 | 6.99E-15    | 12.4777256  |
| METAP1       | NM_015143    | 126.2132108 | 4.848338455 | 3.99E-11    | 26.03226073 |
| C6orf120     | NM_001029863 | 209.6132108 | 14.65023283 | 3.38E-16    | 14.3078416  |



|                 |              |             |             |             |             |
|-----------------|--------------|-------------|-------------|-------------|-------------|
| CSRP2           | NM_001300965 | 205.6417822 | 7.79532614  | 1.42E-18    | 26.38013837 |
| RSG1            | NM_030907    | 131.2176143 | 16.22431216 | 1.45E-08    | 8.087715095 |
| CALR3           | NM_145046    | 56.95391796 | 4.442107193 | 0.000111607 | 12.82137407 |
| SUCLG1          | NM_003849    | 79.74951438 | 7.415649153 | 6.90E-06    | 10.75421891 |
| NAT10           | NM_001144030 | 141.2264215 | 9.126085762 | 8.73E-11    | 15.47502677 |
| MRPL48          | NM_016055    | 279.1934465 | 6.460397702 | 1.81E-25    | 43.21613921 |
| MRS2            | NM_020662    | 193.8879679 | 6.165819832 | 2.01E-18    | 31.44561035 |
| NGRN            | NR_028052    | 226.5319    | 16.08198109 | 6.79E-18    | 14.0860693  |
| TATDN1          | NR_027427    | 236.5407072 | 11.40152517 | 4.23E-19    | 20.74640924 |
| ENTPD5          | NM_001249    | 180.7802357 | 8.276955067 | 1.73E-15    | 21.84139388 |
| GADD45GIP1      | NM_052850    | 195.7934465 | 37.56862988 | 2.37E-09    | 5.211620629 |
| LDHD            | NM_153486    | 131.3780858 | 16.18057357 | 3.71E-08    | 8.119494978 |
| SPATA7          | NM_001040428 | 131.2176143 | 1.243073241 | 1.68E-14    | 105.559037  |
| TASP1           | NM_017714    | 183.8791608 | 3.155010006 | 1.42E-17    | 58.28164108 |
| AGO1            | NM_012199    | 174.9033286 | 8.784944123 | 3.47E-14    | 19.90944122 |
| TTC38           | NM_017931    | 161.0835644 | 11.61358589 | 4.10E-12    | 13.87026935 |
| TRMT11          | NM_001031712 | 208.7407072 | 3.607974948 | 1.55E-20    | 57.85536491 |
| MRPS31          | NM_005830    | 221.5274965 | 4.495703148 | 3.51E-22    | 49.27538345 |
| OSBPL11         | NM_022776    | 183.0066572 | 4.393887944 | 3.84E-17    | 41.65027866 |
| GCLM            | NM_002061    | 41.78023574 | 2.230592547 | 0.000497822 | 18.73055471 |
| STPG2           | NM_174952    | 67.83522867 | 1.651105572 | 3.58E-06    | 41.08473123 |
| RPF2            | NM_032194    | 128.2791608 | 5.557223798 | 1.51E-11    | 23.08331739 |
| RPL7L1          | NM_198486    | 128.1186893 | 12.11712949 | 1.69E-09    | 10.57335315 |
| PPM1G           | NM_177983    | 128.1186893 | 10.05680329 | 8.09E-10    | 12.73950435 |
| NKAIN3          | NM_173688    | 42.81321075 | 0.947784963 | 0.000130071 | 45.17186117 |
| USP5            | NM_003481    | 158.1451108 | 12.43413235 | 1.39E-11    | 12.71862856 |
| CDCA7           | NM_031942    | 133.1230929 | 10.21114324 | 3.55E-10    | 13.03704098 |
| TMED9           | NM_017510    | 160.9230929 | 13.71642471 | 5.25E-12    | 11.73214568 |
| FZD1            | NM_003505    | 110.4879679 | 10.85626733 | 8.38E-08    | 10.17734407 |
| PHOSPHO2-KLHL23 | NM_001199290 | 191.8220179 | 8.415170855 | 1.47E-16    | 22.7947859  |
| USP48           | NM_001032730 | 159.0176143 | 6.651532955 | 1.32E-13    | 23.9069122  |
| HMG2            | NM_005517    | 187.8505893 | 30.82835765 | 4.18E-10    | 6.093434865 |
| FAM21A          | NM_001291398 | 100.4791608 | 3.075434881 | 1.12E-09    | 32.67152928 |
| LEPROT          | NM_001198681 | 92.53630363 | 6.749770655 | 2.09E-07    | 13.70954783 |
| RASA2           | NM_006506    | 120.3363036 | 2.584182078 | 1.46E-11    | 46.56649569 |
| ACAA1           | NM_001130410 | 98.57368223 | 11.56790698 | 1.12E-06    | 8.52130661  |
| CKAP2           | NM_001098525 | 123.2747572 | 8.110011893 | 2.40E-10    | 15.20031768 |
| KIF13B          | NM_015254    | 78.55606789 | 4.485125947 | 3.60E-06    | 17.51479642 |
| GEMIN5          | NM_001252156 | 158.1451108 | 4.706186584 | 1.28E-14    | 33.6036636  |
| RB1CC1          | NM_001083617 | 102.5451108 | 2.920983101 | 7.49E-10    | 35.10636908 |
| FHIT            | NM_002012    | 93.56927864 | 2.103214998 | 1.25E-08    | 44.48868934 |
| SLC25A16        | NM_152707    | 178.0022537 | 8.030000434 | 2.41E-15    | 22.16715368 |
| UNC79           | NM_020818    | 113.26595   | 3.136257526 | 1.18E-10    | 36.11500302 |
| MED17           | NM_004268    | 218.5890429 | 7.257826492 | 1.49E-20    | 30.11770027 |
| ALDH1B1         | NM_000692    | 175.9363036 | 10.89542278 | 7.12E-15    | 16.14772617 |
| SHPRH           | NM_173082    | 38.84178218 | 2.408790465 | 0.001650178 | 16.12501491 |
| GFM2            | NM_170681    | 112.553918  | 6.242838535 | 4.36E-09    | 18.02928545 |
| EEF1A1          | NM_001402    | 2632.986997 | 371.2964169 | 3.03E-143   | 7.091334246 |
| RAET1K          | NR_024045    | 130.1846393 | 11.48022679 | 7.14E-10    | 11.33990135 |
| MOB3A           | NM_130807    | 161.0835644 | 14.59746391 | 2.83E-11    | 11.03503769 |
| ADAP2           | NM_018404    | 66.64178218 | 8.602909197 | 0.000149845 | 7.746423989 |
| L3MBTL1         | NM_032107    | 226.5319    | 12.28831456 | 2.65E-18    | 18.43474132 |
| LOC553103       | NR_110997    | 161.9560679 | 6.165114597 | 7.18E-15    | 26.2697579  |
| CLK1            | NM_001162407 | 212.5516643 | 9.941031972 | 3.11E-18    | 21.38124743 |
| FAM86C2P        | NR_024249    | 145.0373786 | 7.631813103 | 1.45E-12    | 19.00431479 |
| GTF2A2          | NM_004492    | 234.4747572 | 5.320624069 | 4.86E-24    | 44.06903291 |
| EME1            | NM_001166131 | 275.2220179 | 30.86317287 | 1.27E-17    | 8.917489434 |
| CCNK            | NM_001099402 | 181.8132108 | 8.406097347 | 2.20E-15    | 21.6287301  |
| SLC9A3R1        | NM_004252    | 378.4791608 | 24.57123939 | 4.43E-28    | 15.40334026 |
| FAM110C         | NM_001077710 | 75.61761433 | 5.071670681 | 3.04E-06    | 14.90980371 |
| HERC5           | NM_016323    | 92.53630363 | 3.997625165 | 7.56E-08    | 23.14781897 |
| AGPS            | NM_003659    | 133.2835644 | 1.542800779 | 2.83E-13    | 86.39065147 |

|              |              |             |             |             |             |
|--------------|--------------|-------------|-------------|-------------|-------------|
| NDUFS6       | NM_004553    | 157.1121358 | 11.0434798  | 2.01E-12    | 14.22668748 |
| KATNA1       | NM_007044    | 162.1165394 | 6.130266388 | 5.68E-14    | 26.4452683  |
| SEC14L2      | NM_001291932 | 210.6461858 | 19.14514113 | 1.83E-14    | 11.00259248 |
| NFE2L3       | NM_004289    | 158.8571429 | 18.50235717 | 2.29E-10    | 8.585778634 |
| MIATNB       | NR_110543    | 96.66820368 | 7.030766918 | 2.65E-07    | 13.74931139 |
| ZNF766       | NM_001010851 | 83.56047148 | 6.952625851 | 2.63E-06    | 12.01854857 |
| GALM         | NM_138801    | 57.8264215  | 9.34775298  | 0.000928041 | 6.18613068  |
| MCM8-AS1     | NR_110101    | 123.2747572 | 7.61110633  | 6.32E-10    | 16.1966936  |
| CTTN         | NM_005231    | 159.0176143 | 14.50145308 | 4.57E-11    | 10.96563313 |
| LSM1         | NR_045493    | 143.1319    | 10.53084861 | 4.33E-11    | 13.59167769 |
| PCTP         | NM_021213    | 210.8066572 | 8.492930104 | 1.46E-18    | 24.82142849 |
| PLA2G16      | NM_007069    | 120.3363036 | 7.338079519 | 9.88E-10    | 16.39888248 |
| SPATA20      | NM_001258372 | 99.60665724 | 15.37304142 | 1.01E-05    | 6.479307154 |
| USF1         | NM_007122    | 152.9802357 | 15.51915609 | 1.04E-10    | 9.857509964 |
| LMAN1        | NM_005570    | 130.1846393 | 5.187862854 | 3.36E-12    | 25.09407881 |
| PPP1R37      | NM_019121    | 113.4264215 | 8.938205473 | 5.35E-09    | 12.69006646 |
| EDEM1        | NM_014674    | 176.9692786 | 8.05631194  | 1.16E-15    | 21.96653754 |
| RERE         | NM_012102    | 223.5934465 | 5.232059544 | 6.58E-20    | 42.73526412 |
| WDR90        | NM_145294    | 62.67035361 | 7.695330449 | 0.000198139 | 8.143945737 |
| XRN2         | NM_012255    | 154.8857143 | 3.803997962 | 4.68E-14    | 40.7165608  |
| BAZ1A        | NM_013448    | 66.64178218 | 5.545186658 | 4.00E-05    | 12.01795111 |
| MESDC1       | NM_022566    | 175.9363036 | 15.5899646  | 1.55E-12    | 11.28522791 |
| DTYMK        | NR_033255    | 104.4505893 | 21.69767726 | 4.50E-05    | 4.813906487 |
| C4orf33      | NM_001099783 | 84.43297501 | 1.52959185  | 6.17E-10    | 55.19967631 |
| TTC9C        | NM_173810    | 72.67916077 | 7.546941637 | 1.73E-05    | 9.630279956 |
| FNIP1        | NM_133372    | 111.520943  | 4.125495301 | 1.74E-09    | 27.03213428 |
| DEPDC1B      | NM_018369    | 149.1692786 | 3.593945574 | 1.77E-14    | 41.50571442 |
| PRKCQ-AS1    | NR_036502    | 101.5121358 | 2.375913002 | 6.94E-12    | 42.72552729 |
| LOC100270746 | NR_026776    | 160.9230929 | 34.36060747 | 2.88E-05    | 4.68335995  |
| SIRT6        | NM_016539    | 91.50332862 | 14.5838578  | 1.73E-05    | 6.274288317 |
| DEPDC1-AS1   | NR_110671    | 132.2505893 | 4.457685833 | 4.44E-12    | 29.66799239 |
| UROS         | NM_000375    | 239.4791608 | 15.13774699 | 1.22E-18    | 15.82000023 |
| MRT04        | NM_016183    | 111.3604715 | 19.99145604 | 3.93E-06    | 5.570403239 |
| GSK3B        | NM_002093    | 171.9648751 | 3.907520063 | 2.54E-16    | 44.0086992  |
| NBPF25P      | NR_104217    | 71.73651108 | 14.47499327 | 0.000687368 | 4.955892536 |
| ISG20        | NM_002201    | 73.71213579 | 10.09653845 | 7.23E-05    | 7.300733433 |
| CLCN7        | NM_001114331 | 73.71213579 | 7.408368826 | 2.17E-05    | 9.949846925 |
| VPS16        | NM_080413    | 77.52309288 | 8.231119541 | 1.14E-05    | 9.418292675 |
| WDR62        | NM_001083961 | 72.67916077 | 10.64314812 | 0.000192779 | 6.828727735 |
| LINC01185    | NR_033980    | 134.1560679 | 7.003956943 | 2.68E-11    | 19.15432505 |
| CRY1         | NM_004075    | 44.87916077 | 4.11607769  | 0.000526087 | 10.90338039 |
| NDUFA13      | NM_015965    | 170.0593965 | 11.54126203 | 2.01E-13    | 14.73490474 |
| EDEM2        | NM_018217    | 145.3583215 | 7.656550277 | 1.93E-12    | 18.98483211 |
| PERP         | NM_022121    | 209.6132108 | 6.239355211 | 1.66E-20    | 33.59533216 |
| TMF1         | NM_007114    | 135.1890429 | 5.232897279 | 1.80E-12    | 25.83445378 |
| ZMAT5        | NM_019103    | 199.7648751 | 9.916017299 | 9.02E-17    | 20.14567634 |
| IKBKE        | NM_001193322 | 52.98248939 | 9.362412629 | 0.001400058 | 5.659063694 |
| TMSB15A      | NM_021992    | 86.49892504 | 3.070871304 | 8.45E-09    | 28.16755132 |
| AUP1         | NM_181575    | 130.1846393 | 24.47506993 | 2.36E-06    | 5.319071189 |
| DDIT4L       | NM_145244    | 164.8945215 | 11.21643546 | 2.40E-13    | 14.7011519  |
| EFR3A        | NM_015137    | 323.0396323 | 3.674191891 | 1.46E-31    | 87.92127407 |
| ERBB3        | NM_001005915 | 174.7428571 | 11.9615764  | 7.90E-14    | 14.60868127 |
| OAZ2         | NM_001301302 | 187.6901179 | 17.23885033 | 1.35E-13    | 10.88762384 |
| NR4A3        | NM_173199    | 131.2176143 | 10.09715153 | 4.85E-10    | 12.99550809 |
| DDX6         | NM_001257191 | 83.56047148 | 5.498191068 | 6.41E-07    | 15.19781151 |
| EFNA4        | NM_182690    | 243.2901179 | 11.16030055 | 1.71E-21    | 21.79960269 |
| TFAP2E       | NM_178548    | 152.9802357 | 13.58852309 | 7.17E-11    | 11.2580473  |
| FAM24B-CUZD1 | NR_037915    | 92.69677511 | 4.999594821 | 8.87E-08    | 18.5408575  |
| SOX4         | NM_003107    | 208.5802357 | 16.9293252  | 2.68E-15    | 12.32064676 |
| KLHL12       | NM_021633    | 305.0879679 | 7.440844018 | 2.20E-28    | 41.00179593 |
| DTD1         | NM_080820    | 70.77368223 | 3.423708307 | 1.74E-06    | 20.67164486 |
| ELF3         | NM_001114309 | 257.4308251 | 21.76763485 | 1.87E-18    | 11.82631126 |

|              |              |             |             |             |             |
|--------------|--------------|-------------|-------------|-------------|-------------|
| ESYT1        | NM_015292    | 186.8176143 | 17.81571695 | 3.12E-13    | 10.48611262 |
| LINC01057    | NR_104131    | 90.47035361 | 4.914276362 | 1.58E-07    | 18.40970001 |
| TSC22D2      | NM_014779    | 109.2945215 | 4.355972212 | 1.47E-09    | 25.09072973 |
| EPC2         | NM_015630    | 78.55606789 | 2.692953046 | 4.10E-07    | 29.17097571 |
| FRY-AS1      | NR_103839    | 75.61761433 | 7.436311338 | 2.41E-05    | 10.16869936 |
| AMACR        | NM_014324    | 268.4726073 | 6.540097925 | 3.40E-26    | 41.05024272 |
| UGGT2        | NM_020121    | 158.1451108 | 2.766220349 | 4.84E-15    | 57.17010609 |
| BRPF1        | NM_004634    | 110.3274965 | 10.48634213 | 2.00E-08    | 10.52106588 |
| DNAJB9       | NM_012328    | 96.66820368 | 17.60091626 | 3.09E-05    | 5.492225645 |
| WDR36        | NM_139281    | 116.3648751 | 3.099010943 | 5.86E-12    | 37.54903652 |
| CENPH        | NM_022909    | 209.7736822 | 6.213927654 | 2.61E-20    | 33.75862963 |
| LOC100287944 | NR_040246    | 222.5604715 | 4.206196112 | 3.86E-20    | 52.91252846 |
| SFN          | NM_006142    | 297.1451108 | 59.16633143 | 3.10E-11    | 5.022199343 |
| CBX2         | NM_032647    | 141.2264215 | 20.63723153 | 7.31E-08    | 6.84328328  |
| CNBP         | NM_001127193 | 181.1011787 | 10.81307686 | 9.36E-15    | 16.74834841 |
| VPS28        | NM_183057    | 245.5165394 | 33.64112274 | 4.02E-14    | 7.298107774 |
| EID2B        | NM_152361    | 150.0417822 | 12.81726427 | 1.13E-10    | 11.70622521 |
| KLHL7        | NR_033329    | 213.7451108 | 7.859857659 | 1.61E-19    | 27.19452693 |
| ZNF680       | NM_001130022 | 137.0945215 | 4.716955479 | 1.01E-12    | 29.06419661 |
| CDCA4        | NM_017955    | 126.2132108 | 16.01752692 | 6.89E-08    | 7.879694001 |
| POLR3G       | NM_006467    | 172.8373786 | 2.980492543 | 3.46E-17    | 57.98953566 |
| MDP1         | NM_001199822 | 165.9274965 | 27.28611503 | 1.85E-08    | 6.081023125 |
| DCDC1        | NM_181807    | 78.55606789 | 2.225287742 | 3.26E-07    | 35.30153265 |
| DEFA4        | NM_001925    | 32.80440358 | 1.819821404 | 0.004962522 | 18.02616648 |
| PDLIM7       | NM_213636    | 301.1165394 | 24.1152329  | 9.12E-22    | 12.48656982 |
| PRKCH        | NM_006255    | 103.4176143 | 5.044323017 | 1.40E-08    | 20.5017827  |
| TMOD3        | NM_014547    | 210.6461858 | 3.640640647 | 3.96E-20    | 57.85964785 |
| MAP1B        | NM_005909    | 71.80665724 | 4.914303007 | 1.11E-05    | 14.61176837 |
| CNNM2        | NM_199077    | 203.7363036 | 13.1979934  | 2.41E-16    | 15.4369151  |
| GHITM        | NM_014394    | 86.65939651 | 6.069695542 | 6.42E-07    | 14.27738771 |
| LNX1         | NM_001126328 | 79.42857143 | 5.418567526 | 1.87E-06    | 14.65859216 |
| PRUNE        | NM_021222    | 150.2022537 | 7.203698268 | 3.02E-13    | 20.85071418 |
| ABCD1        | NM_000033    | 126.2132108 | 6.124812206 | 5.83E-11    | 20.6068703  |
| ARPC4        | NM_005718    | 176.9692786 | 14.7492314  | 1.01E-12    | 11.99854242 |
| ARHGAP4      | NM_001164741 | 80.62201792 | 5.471601072 | 5.91E-07    | 14.73463011 |
| LINC01106    | NR_027244    | 161.9560679 | 13.17202179 | 5.54E-12    | 12.29546006 |
| SIL1         | NM_001037633 | 199.7648751 | 7.108035859 | 8.44E-17    | 28.10408938 |
| ARHGAP1      | NM_004308    | 207.7077322 | 9.783834052 | 3.22E-18    | 21.22968676 |
| RRAS2        | NM_001177315 | 56.63297501 | 3.398069514 | 3.73E-05    | 16.66622027 |
| RGP1         | NM_001080496 | 107.3890429 | 18.11316185 | 5.13E-06    | 5.928785036 |
| MYH9         | NM_002473    | 241.3846393 | 10.32140356 | 8.40E-20    | 23.38680374 |
| GPAM         | NM_020918    | 287.1363036 | 6.099746941 | 5.68E-28    | 47.07347803 |
| CCZ1B        | NM_198097    | 188.7230929 | 6.874671614 | 2.56E-17    | 27.45194294 |
| PLAA         | NM_001031689 | 117.2373786 | 5.980161852 | 2.35E-10    | 19.6043822  |
| FTSJ3        | NM_017647    | 281.2593965 | 45.91211884 | 2.58E-14    | 6.126038258 |
| C10orf35     | NM_145306    | 82.52749646 | 16.34291208 | 0.000282604 | 5.049742425 |
| MDN1         | NM_014611    | 143.1319    | 5.650107963 | 1.94E-12    | 25.33259559 |
| NPPC         | NM_024409    | 55.76047148 | 5.395017534 | 0.000108039 | 10.33554963 |
| FKBP1B       | NM_004116    | 121.2088072 | 10.42731739 | 1.02E-08    | 11.62416014 |
| LOC100129917 | NR_036512    | 211.6791608 | 20.33049774 | 1.45E-13    | 10.41190253 |
| VTA1         | NM_001286371 | 104.4505893 | 3.509438632 | 3.62E-10    | 29.76276274 |
| ATP5L        | NR_033759    | 60.76487506 | 9.79843026  | 0.00088174  | 6.201490795 |
| MTIF2        | NM_001005369 | 181.9736822 | 7.498975137 | 2.45E-16    | 24.2664736  |
| DFNB31       | NM_015404    | 108.4220179 | 8.545401599 | 2.43E-08    | 12.68776156 |
| MTSS1        | NM_001282974 | 84.59344649 | 10.16317934 | 1.40E-05    | 8.323521965 |
| UTP15        | NM_032175    | 90.63082508 | 2.010784899 | 3.02E-10    | 45.07236211 |
| TACO1        | NM_016360    | 213.5846393 | 15.49491234 | 2.43E-16    | 13.78417862 |
| RAB3B        | NM_002867    | 92.53630363 | 6.934234081 | 8.22E-07    | 13.34484855 |
| C2orf73      | NM_001100396 | 58.85939651 | 2.916550476 | 1.05E-05    | 20.18116847 |
| PLK1         | NM_005030    | 143.1319    | 16.03753502 | 1.62E-09    | 8.924806702 |
| NCAPG        | NM_022346    | 122.2417822 | 5.58657047  | 3.76E-11    | 21.88136404 |
| TSTD2        | NM_139246    | 110.3274965 | 9.188990476 | 3.89E-08    | 12.00648719 |

|              |              |             |             |             |             |
|--------------|--------------|-------------|-------------|-------------|-------------|
| FBXO33       | NM_203301    | 56.63297501 | 3.676371076 | 2.79E-05    | 15.40458616 |
| ZNF860       | NM_001137674 | 80.46154644 | 7.476501801 | 2.09E-06    | 10.7619243  |
| MYSM1        | NM_001085487 | 140.1934465 | 5.186282951 | 8.32E-13    | 27.03158463 |
| SMPD2        | NM_003080    | 180.9407072 | 27.11921486 | 5.31E-10    | 6.672048145 |
| FAM114A2     | NM_018691    | 171.9648751 | 3.430598479 | 1.18E-16    | 50.12678578 |
| GNL3L        | NM_019067    | 85.46595002 | 5.804137133 | 3.09E-07    | 14.7250053  |
| ERN1         | NM_001433    | 245.5165394 | 11.24833322 | 2.11E-20    | 21.82692622 |
| CERS6        | NM_001256126 | 49.88356436 | 3.945807998 | 0.000305789 | 12.64216718 |
| PRMT7        | NM_001290018 | 178.8747572 | 8.499137634 | 1.42E-15    | 21.04622432 |
| SNRNP27      | NM_006857    | 146.0703536 | 7.14282206  | 5.91E-13    | 20.44994995 |
| RPL29        | NM_000992    | 260.3692786 | 27.47082305 | 5.06E-16    | 9.478029768 |
| ARL14EP      | NM_152316    | 192.8549929 | 5.390589509 | 1.66E-19    | 35.77623423 |
| SNHG5        | NR_003038    | 300.9560679 | 46.26393151 | 3.09E-14    | 6.505198716 |
| ZNF131       | NR_123720    | 177.8417822 | 6.810622548 | 2.54E-15    | 26.11241203 |
| RNF25        | NM_022453    | 155.2066572 | 16.49757639 | 2.31E-10    | 9.407845953 |
| OSMR-AS1     | NR_109951    | 141.2264215 | 4.908402928 | 3.11E-12    | 28.7723774  |
| SLC20A1      | NM_005415    | 276.0945215 | 12.2146285  | 6.24E-24    | 22.60359547 |
| POMGNT2      | NM_032806    | 143.1319    | 10.32952032 | 3.05E-11    | 13.8565873  |
| PSMD3        | NM_002809    | 122.4022537 | 15.62153917 | 5.45E-08    | 7.83547974  |
| RPL32        | NM_001007073 | 168.86595   | 27.57399702 | 3.08E-09    | 6.124101264 |
| TRIM37       | NM_001005207 | 212.5516643 | 5.953219767 | 2.83E-19    | 35.70364821 |
| YWHAQ        | NM_006826    | 191.8220179 | 7.060797443 | 6.82E-17    | 27.1671889  |
| C4orf36      | NM_144645    | 100.3186893 | 3.288481855 | 8.03E-10    | 30.50607962 |
| VPS4B        | NM_004869    | 143.1319    | 6.387526418 | 2.92E-12    | 22.40803258 |
| HEMK1        | NM_016173    | 108.4220179 | 12.09453866 | 1.95E-07    | 8.964543498 |
| FAM212A      | NM_203370    | 171.8044036 | 32.90601885 | 1.93E-07    | 5.221063184 |
| QRICH1       | NM_198880    | 107.5495144 | 9.56169575  | 1.09E-07    | 11.24795404 |
| SNAPC5       | NM_006049    | 162.9890429 | 13.50656481 | 2.59E-12    | 12.06739428 |
| LINC00630    | NR_038988    | 103.4176143 | 2.022664745 | 6.56E-10    | 51.12938988 |
| LOC101929655 | NR_120365    | 38.84178218 | 3.496743961 | 0.001827618 | 11.10798578 |
| ZZZ3         | NM_015534    | 143.1319    | 3.712310736 | 8.54E-14    | 38.55601275 |
| SERAC1       | NR_073096    | 141.06595   | 3.814354848 | 6.40E-13    | 36.98291209 |
| PHLDB3       | NM_198850    | 100.4791608 | 11.36734681 | 4.89E-07    | 8.839279955 |
| COPS2        | NM_004236    | 123.4352287 | 2.973026991 | 6.91E-12    | 41.51836799 |
| IDE          | NM_004969    | 211.6791608 | 4.882087939 | 2.02E-19    | 43.35832607 |
| TMEM255B     | NM_182614    | 89.4373786  | 4.430539183 | 1.70E-07    | 20.18656757 |
| TNFRSF10C    | NM_003841    | 72.83963225 | 2.742315034 | 1.24E-06    | 26.56136562 |
| RASA3        | NM_007368    | 47.81761433 | 7.412543599 | 0.004890057 | 6.450904968 |
| TRAM2        | NM_012288    | 209.6132108 | 9.937379147 | 5.28E-17    | 21.09340981 |
| MTOR         | NM_004958    | 147.9758322 | 7.575489985 | 4.88E-12    | 19.53349981 |
| MRPS6        | NM_032476    | 184.7516643 | 6.254602597 | 4.57E-16    | 29.53851367 |
| TRIM72       | NM_001008274 | 101.3516643 | 20.92851967 | 4.76E-05    | 4.842753615 |
| EIF3I        | NM_003757    | 132.2505893 | 11.87911313 | 1.68E-09    | 11.1330356  |
| BEND3        | NM_001080450 | 41.94070721 | 6.385036617 | 0.004141079 | 6.568593061 |
| LOC728323    | NR_024437    | 132.0901179 | 1.688938354 | 1.35E-13    | 78.20896339 |
| EMB          | NM_198449    | 64.73630363 | 3.183275369 | 3.69E-06    | 20.33638191 |
| FAM43A       | NM_153690    | 239.4791608 | 4.019844918 | 2.32E-27    | 59.57422878 |
| CAV1         | NM_001753    | 94.60225365 | 6.791423074 | 2.84E-07    | 13.92966579 |
| FARS2        | NM_006567    | 43.84618576 | 2.779277877 | 0.001054763 | 15.77610721 |
| COMMD3       | NM_012071    | 173.8703536 | 13.42706216 | 4.45E-13    | 12.94924768 |
| LRP12        | NM_013437    | 43.84618576 | 0.720777312 | 7.40E-05    | 60.83180623 |
| ARHGAP10     | NM_024605    | 39.87475719 | 3.447744691 | 0.001937439 | 11.56546112 |
| ATAD1        | NM_032810    | 158.1451108 | 3.076212177 | 6.41E-16    | 51.40903869 |
| IL17RB       | NM_018725    | 164.8945215 | 12.4711478  | 6.97E-13    | 13.2220806  |
| VMAC         | NM_001017921 | 101.5121358 | 11.91896918 | 4.45E-07    | 8.516855295 |
| SEMA3G       | NM_020163    | 171.8044036 | 14.63231476 | 2.06E-12    | 11.74143711 |
| GOLGA2       | NM_004486    | 102.3846393 | 19.14826591 | 1.33E-05    | 5.346940542 |
| R3HDM4       | NM_138774    | 52.66154644 | 7.75655916  | 0.00205045  | 6.789292179 |
| ID2          | NM_002166    | 315.9692786 | 49.97770224 | 5.82E-16    | 6.322204993 |
| PARP4        | NM_006437    | 258.3033286 | 5.626581058 | 3.32E-24    | 45.90768816 |
| ANGEL1       | NM_015305    | 191.8220179 | 7.064162746 | 1.08E-17    | 27.1542467  |
| PER1         | NM_002616    | 123.4352287 | 14.47251955 | 3.06E-08    | 8.528938462 |

|            |              |             |             |             |             |
|------------|--------------|-------------|-------------|-------------|-------------|
| KIF15      | NM_020242    | 106.3560679 | 3.620561123 | 4.52E-10    | 29.37557585 |
| TAF7       | NM_005642    | 231.5363036 | 20.74727814 | 8.40E-16    | 11.15983996 |
| POM121C    | NM_001099415 | 191.8220179 | 13.95855171 | 1.81E-14    | 13.74225793 |
| ZNF326     | NM_182975    | 266.2461858 | 1.005077155 | 5.61E-39    | 264.9012412 |
| TFPT       | NM_013342    | 143.1319    | 35.41811445 | 6.61E-06    | 4.041206097 |
| NRBF2      | NM_001282405 | 238.4461858 | 6.340704696 | 1.73E-22    | 37.60562859 |
| MIPEP      | NM_005932    | 140.1934465 | 4.785973767 | 3.14E-12    | 29.29256476 |
| EED        | NM_152991    | 233.6022537 | 6.543705536 | 4.94E-22    | 35.69877226 |
| TMEM185B   | NM_024121    | 120.3363036 | 21.74059301 | 3.88E-06    | 5.535097575 |
| SYNE4      | NM_001039876 | 149.1692786 | 19.74678172 | 6.35E-09    | 7.554105817 |
| SLC25A39   | NM_016016    | 83.72094295 | 10.2095294  | 1.02E-05    | 8.200274435 |
| TMEM170A   | NM_145254    | 296.9846393 | 12.95772361 | 4.02E-25    | 22.91950718 |
| DSCR3      | NM_006052    | 56.63297501 | 7.733497088 | 0.000849548 | 7.32307446  |
| SLCO4A1    | NM_016354    | 78.55606789 | 13.2057122  | 0.000190996 | 5.948643036 |
| CFAP43     | NM_025145    | 172.9978501 | 8.208490616 | 1.37E-14    | 21.07547638 |
| ASXL2      | NM_018263    | 84.59344649 | 3.819940274 | 6.36E-08    | 22.14522752 |
| C12orf10   | NM_021640    | 208.5802357 | 18.23106989 | 2.37E-15    | 11.4409213  |
| FHOD1      | NM_013241    | 225.6593965 | 30.12629569 | 2.64E-13    | 7.490446182 |
| ARHGAP23   | NM_001199417 | 73.55166431 | 8.073561581 | 3.07E-05    | 9.110188059 |
| PIAS2      | NM_173206    | 86.49892504 | 4.025930714 | 4.49E-07    | 21.485448   |
| GPAA1      | NM_003801    | 205.6417822 | 33.59898035 | 1.75E-10    | 6.120476872 |
| DCUN1D5    | NM_032299    | 167.832975  | 3.352187102 | 1.44E-16    | 50.06670866 |
| OTUD6B-AS1 | NR_110439    | 45.91213579 | 2.832631136 | 0.000377352 | 16.20830019 |
| WDR18      | NM_024100    | 74.7451108  | 7.518780608 | 8.87E-06    | 9.941121399 |
| EPS8       | NM_004447    | 187.8505893 | 3.710169909 | 2.91E-18    | 50.63126325 |
| YARS       | NM_003680    | 162.1165394 | 10.75854917 | 6.81E-13    | 15.06862467 |
| GATA2-AS1  | NR_125398    | 132.2505893 | 10.62533909 | 7.51E-10    | 12.44671706 |
| KMT2E      | NM_182931    | 106.3560679 | 4.55497988  | 5.22E-09    | 23.34940454 |
| FBXO30     | NM_032145    | 109.2945215 | 3.832155135 | 1.25E-10    | 28.52038021 |
| NOL6       | NM_022917    | 163.8615464 | 13.26842102 | 2.92E-12    | 12.34973974 |
| ADPRHL2    | NM_017825    | 236.5407072 | 16.82720011 | 1.75E-18    | 14.05704489 |
| DDX60      | NM_017631    | 47.81761433 | 2.424551478 | 0.000256423 | 19.72225163 |
| ZBTB33     | NM_006777    | 110.3274965 | 5.360746206 | 5.74E-10    | 20.58062296 |
| KIAA2026   | NM_001017969 | 42.97368223 | 2.748725385 | 0.000914505 | 15.63403986 |
| PEX26      | NM_017929    | 63.8638001  | 9.545314426 | 0.000633204 | 6.690591556 |
| ADPRM      | NM_020233    | 157.9846393 | 7.556447783 | 7.65E-14    | 20.90726276 |
| FUOM       | NM_001098483 | 68.54726073 | 13.20398318 | 0.001230637 | 5.19140776  |
| RIPK2      | NM_003821    | 298.1780858 | 5.28605216  | 7.61E-30    | 56.40846453 |
| SH3BP1     | NM_018957    | 57.66595002 | 10.11738583 | 0.002202322 | 5.699688731 |
| NFRKB      | NM_001143835 | 186.8176143 | 8.516460397 | 1.31E-15    | 21.9360633  |
| TUBGCP6    | NM_020461    | 121.2088072 | 8.965585908 | 4.60E-09    | 13.51934033 |
| KEAP1      | NM_203500    | 100.4791608 | 16.13306336 | 6.16E-06    | 6.228151377 |
| JRKL       | NM_001261833 | 152.4286752 | 5.571717313 | 9.73E-15    | 27.35757516 |
| SLC9C1     | NM_183061    | 60.76487506 | 1.993205382 | 2.00E-05    | 30.48600792 |
| TSPAN31    | NM_005981    | 111.3604715 | 23.50289648 | 2.17E-05    | 4.738159467 |
| NECAP1     | NR_024260    | 133.1230929 | 7.910267386 | 4.50E-11    | 16.82915209 |
| ZNF446     | NM_017908    | 134.4770108 | 24.57851516 | 4.85E-07    | 5.471323632 |
| COX8A      | NM_004074    | 140.1934465 | 21.19149378 | 2.75E-07    | 6.615552821 |
| MED11      | NM_001001683 | 316.8417822 | 9.278447066 | 6.86E-30    | 34.14814785 |
| SNRPF      | NM_003095    | 165.9274965 | 7.800015249 | 2.92E-15    | 21.27271437 |
| MARCKSL1   | NR_052852    | 162.8285714 | 40.66061971 | 2.98E-06    | 4.004576728 |
| CRYM-AS1   | NR_026675    | 101.3516643 | 10.14150775 | 2.88E-07    | 9.993747161 |
| GLIPR1L1   | NM_152779    | 45.75166431 | 1.725215599 | 0.000282922 | 26.51938942 |
| CLCN3      | NM_001829    | 152.1077322 | 3.216965765 | 7.48E-15    | 47.28298132 |
| ENPP5      | NM_001290072 | 191.8220179 | 4.05483077  | 5.70E-21    | 47.30703421 |
| WDSUB1     | NM_152528    | 41.94070721 | 3.479501543 | 0.000856931 | 12.05365386 |
| PHYH       | NM_001037537 | 65.76927864 | 9.490738497 | 0.000451858 | 6.929837827 |
| H2AFY2     | NM_018649    | 96.5077322  | 8.112911492 | 2.26E-07    | 11.89557316 |
| SDCCAG8    | NM_006642    | 209.6132108 | 4.369455963 | 8.42E-19    | 47.97238203 |
| STX18-AS1  | NR_037888    | 239.4791608 | 6.752934007 | 9.79E-21    | 35.46297958 |
| ZSCAN21    | NM_145914    | 158.1451108 | 14.48217212 | 2.17E-11    | 10.91998558 |
| ZNF41      | NM_153380    | 76.49011787 | 4.07119808  | 1.73E-06    | 18.78811012 |

|              |              |             |             |             |             |
|--------------|--------------|-------------|-------------|-------------|-------------|
| HRSP12       | NM_005836    | 296.9846393 | 6.100656551 | 1.83E-30    | 48.68076687 |
| RPS4X        | NM_001007    | 161.9560679 | 13.44526326 | 6.03E-12    | 12.04558548 |
| NAMPT        | NM_005746    | 73.55166431 | 4.138562291 | 3.41E-06    | 17.77227431 |
| ZNF264       | NM_003417    | 172.9978501 | 9.089345651 | 2.16E-14    | 19.03303678 |
| ZBTB17       | NM_001287603 | 107.2285714 | 11.1675751  | 8.48E-08    | 9.601777508 |
| HSPA4L       | NM_014278    | 207.8682037 | 3.974544499 | 2.00E-20    | 52.29988083 |
| MOSPD1       | NM_019556    | 107.2285714 | 3.887760768 | 4.59E-10    | 27.58106216 |
| TFB2M        | NM_022366    | 99.60665724 | 4.075965667 | 4.00E-09    | 24.43756041 |
| GLRX3        | NM_001199868 | 53.85499293 | 3.030896789 | 5.51E-05    | 17.76866607 |
| MED30        | NM_001282986 | 96.5077322  | 1.068776279 | 7.61E-12    | 90.29741218 |
| COL6A1       | NM_001848    | 210.4857143 | 5.613576841 | 1.33E-20    | 37.49582846 |
| C10orf54     | NM_022153    | 189.7560679 | 9.887599533 | 5.76E-16    | 19.1913181  |
| CAMK2N1      | NM_018584    | 63.70332862 | 3.908266843 | 9.51E-06    | 16.29963643 |
| LARP1B       | NM_178043    | 54.72749646 | 3.563060562 | 6.71E-05    | 15.35968741 |
| MKKS         | NR_072977    | 174.9033286 | 6.023841175 | 7.87E-16    | 29.03518262 |
| LMF2         | NM_033200    | 138.1274965 | 8.374975668 | 8.27E-12    | 16.49288332 |
| TINF2        | NM_012461    | 145.1978501 | 32.10026158 | 3.22E-06    | 4.52326065  |
| GJB5         | NM_005268    | 94.44178218 | 11.17466514 | 3.52E-06    | 8.451419434 |
| TTC37        | NM_014639    | 121.2088072 | 3.425534473 | 1.41E-11    | 35.38391107 |
| LRR1         | NM_203467    | 126.3736822 | 12.46932062 | 4.66E-09    | 10.13476885 |
| SEC62        | NM_003262    | 67.67475719 | 5.080177098 | 1.32E-05    | 13.32133819 |
| TP53RK       | NM_033550    | 133.2835644 | 14.327042   | 4.46E-09    | 9.302936669 |
| IAH1         | NM_001039613 | 103.4176143 | 18.46044753 | 1.04E-05    | 5.602118485 |
| KTI12        | NM_138417    | 129.1516643 | 15.44697588 | 1.04E-07    | 8.360967564 |
| EFR3B        | NM_014971    | 54.72749646 | 7.342623091 | 0.001646012 | 7.453398572 |
| SRD5A1       | NM_001047    | 179.7472607 | 8.246569382 | 8.11E-16    | 21.79661049 |
| TDP2         | NM_016614    | 171.9648751 | 8.194118419 | 5.35E-15    | 20.98637904 |
| CHPF         | NM_024536    | 243.2901179 | 37.5055736  | 3.36E-13    | 6.486772352 |
| SMCR8        | NM_144775    | 90.79129656 | 16.77427737 | 8.22E-05    | 5.412531017 |
| TIMM13       | NM_012458    | 159.0176143 | 25.0394416  | 2.58E-08    | 6.350685327 |
| RILPL2       | NM_145058    | 105.3230929 | 8.795961507 | 8.40E-08    | 11.9740284  |
| AKTIP        | NM_022476    | 128.1186893 | 7.226706787 | 6.93E-11    | 17.7285025  |
| UBE2N        | NM_003348    | 131.2176143 | 7.7989694   | 6.25E-11    | 16.82499412 |
| LAD1         | NM_005558    | 113.4264215 | 10.110887   | 1.20E-08    | 11.21824638 |
| CD40         | NM_001250    | 162.9890429 | 8.301095623 | 7.43E-14    | 19.63464226 |
| SMURF2       | NM_022739    | 52.66154644 | 6.295258678 | 0.000790087 | 8.365271252 |
| KTN1-AS1     | NR_027123    | 152.9802357 | 18.22646256 | 1.20E-09    | 8.393303703 |
| CALM1        | NM_006888    | 262.2747572 | 19.80723725 | 2.84E-19    | 13.24135991 |
| TMEM128      | NM_001297551 | 213.5846393 | 9.10872405  | 2.22E-19    | 23.44835985 |
| LARS         | NM_020117    | 119.3033286 | 3.988035359 | 1.27E-10    | 29.91531365 |
| KDM1A        | NM_001009999 | 183.0066572 | 5.588240744 | 6.04E-17    | 32.74852778 |
| TMEM206      | NM_001198862 | 165.0549929 | 7.929965084 | 3.98E-14    | 20.81408823 |
| ADA          | NM_000022    | 92.37583215 | 12.65663517 | 1.22E-05    | 7.298609065 |
| SIAH2        | NM_005067    | 148.1363036 | 10.06888954 | 5.63E-12    | 14.71227815 |
| TSR1         | NM_018128    | 78.55606789 | 19.41114212 | 0.001225147 | 4.046957536 |
| NRAS         | NM_002524    | 95.47475719 | 8.992291159 | 5.83E-07    | 10.61740056 |
| PHF11        | NM_001040443 | 66.64178218 | 7.807686503 | 0.000140557 | 8.535407019 |
| LOC100505938 | NR_125740    | 48.69011787 | 3.502285008 | 0.000263359 | 13.90238595 |
| SLC2A13      | NM_052885    | 115.3319    | 2.447138333 | 1.06E-10    | 47.12929322 |
| GCN1L1       | NM_006836    | 157.9846393 | 10.80318759 | 3.81E-12    | 14.62389115 |
| KLHL11       | NM_018143    | 243.4505893 | 11.25181661 | 1.87E-21    | 21.63655859 |
| MBLAC2       | NM_203406    | 205.6417822 | 7.846318047 | 5.40E-19    | 26.20869826 |
| MRPL54       | NM_172251    | 153.1407072 | 18.49102279 | 8.65E-10    | 8.281894894 |
| AP3B1        | NM_003664    | 151.0747572 | 3.272824451 | 2.25E-14    | 46.1603607  |
| LRRC61       | NM_023942    | 74.58463932 | 8.89662841  | 6.13E-05    | 8.383472467 |
| USP37        | NM_020935    | 139.1604715 | 6.093985898 | 3.02E-12    | 22.83570619 |
| KCTD11       | NM_001002914 | 162.9890429 | 28.61995513 | 2.64E-08    | 5.69494404  |
| CASP6        | NM_001226    | 164.0220179 | 8.205692434 | 2.94E-14    | 19.98880889 |
| PAFAH1B1     | NM_000430    | 154.0132108 | 7.679728863 | 1.02E-12    | 20.05451149 |
| TIMP1        | NM_003254    | 84.43297501 | 9.446356279 | 3.25E-06    | 8.938152714 |
| FDXACB1      | NR_038364    | 68.7077322  | 9.05980255  | 7.53E-05    | 7.583800179 |
| MED18        | NM_017638    | 127.2461858 | 16.05589071 | 5.07E-08    | 7.925202537 |

|              |              |             |             |             |             |
|--------------|--------------|-------------|-------------|-------------|-------------|
| FCSD1        | NM_033449    | 124.3077322 | 19.94197094 | 3.33E-07    | 6.233472737 |
| SGCB         | NM_000232    | 44.7186893  | 4.969340689 | 0.001649875 | 8.998917985 |
| RPS9         | NM_001013    | 360.5274965 | 42.18397217 | 3.84E-22    | 8.546551639 |
| DOHH         | NM_031304    | 164.0220179 | 7.160956561 | 2.62E-15    | 22.90504299 |
| KCTD21       | NM_001029859 | 162.9890429 | 9.480738728 | 8.18E-14    | 17.19159736 |
| HSDL2        | NM_032303    | 72.67916077 | 4.853563123 | 1.08E-05    | 14.97439282 |
| ACTR1A       | NM_005736    | 164.1824894 | 20.13511374 | 3.79E-10    | 8.154038337 |
| C9orf43      | NM_152786    | 157.1121358 | 6.316162641 | 1.64E-14    | 24.87461846 |
| KLF3         | NM_016531    | 42.81321075 | 5.816850796 | 0.003929496 | 7.360204387 |
| ZNF777       | NM_015694    | 78.55606789 | 6.456539647 | 1.06E-05    | 12.16689933 |
| ESYT2        | NM_020728    | 46.78463932 | 5.507937809 | 0.002452101 | 8.494039138 |
| TMEM205      | NM_198536    | 62.83082508 | 13.63059505 | 0.002308614 | 4.609543813 |
| PMS2P3       | NR_028059    | 144.1648751 | 5.388547638 | 5.27E-13    | 26.75393905 |
| GMFB         | NM_004124    | 153.1407072 | 3.135796931 | 3.87E-17    | 48.83629603 |
| DPY19L4      | NM_181787    | 344.8022537 | 4.270660482 | 6.98E-35    | 80.73745387 |
| PRPF8        | NM_006445    | 170.219868  | 11.73739266 | 5.06E-13    | 14.5023578  |
| RUNDC1       | NM_173079    | 91.50332862 | 8.360209214 | 1.11E-06    | 10.94510033 |
| EXOSC7       | NR_023353    | 156.0791608 | 8.589490007 | 1.42E-12    | 18.1709462  |
| SLC7A5P2     | NR_002594    | 318.0352287 | 45.30308843 | 1.23E-16    | 7.020166609 |
| USP14        | NM_005151    | 70.61321075 | 2.161657799 | 7.82E-07    | 32.66622995 |
| BRIX1        | NM_018321    | 103.5780858 | 5.160404507 | 2.37E-09    | 20.07169897 |
| ARGLU1       | NM_018011    | 208.7407072 | 3.512539292 | 1.90E-22    | 59.42729458 |
| KCNJ12       | NM_021012    | 119.3033286 | 11.50157373 | 8.69E-09    | 10.37278301 |
| TRAM2-AS1    | NR_103447    | 130.1846393 | 11.05230107 | 5.30E-10    | 11.77896245 |
| SNRPD1       | NM_006938    | 198.7319    | 8.256768328 | 4.55E-18    | 24.06896889 |
| PBX4         | NR_038198    | 47.81761433 | 9.129763707 | 0.0046733   | 5.237552238 |
| SMIM8        | NM_001042493 | 282.1319    | 3.986607349 | 1.88E-31    | 70.76992423 |
| PLEKHA3      | NM_019091    | 95.63522867 | 3.259604806 | 1.04E-08    | 29.3395164  |
| C5orf30      | NM_033211    | 263.3077322 | 5.972493157 | 4.92E-26    | 44.08673653 |
| ABRACL       | NM_021243    | 72.67916077 | 6.980747691 | 2.35E-05    | 10.41137196 |
| HIF1AN       | NM_017902    | 262.2747572 | 17.89559534 | 5.48E-20    | 14.65582743 |
| CLN8         | NM_018941    | 114.298925  | 11.99091071 | 8.53E-08    | 9.532130444 |
| C17orf85     | NM_001114118 | 168.153918  | 8.879938793 | 1.23E-13    | 18.93638255 |
| PKN2         | NM_006256    | 171.9648751 | 3.912650783 | 1.99E-15    | 43.95098991 |
| CCDC74B      | NM_207310    | 90.63082508 | 11.42000995 | 7.13E-06    | 7.93614239  |
| MANBA        | NM_005908    | 258.3033286 | 4.5883119   | 4.80E-24    | 56.29593939 |
| ZDHHC1       | NM_013304    | 114.4593965 | 9.820277373 | 1.43E-08    | 11.65541381 |
| LOC101928489 | NR_110889    | 77.68356436 | 10.16802069 | 7.37E-05    | 7.639988814 |
| SELM         | NM_080430    | 242.4176143 | 33.18796229 | 2.15E-13    | 7.304383808 |
| SLC46A1      | NM_080669    | 91.50332862 | 21.43221642 | 0.000235168 | 4.269429107 |
| SEH1L        | NM_001013437 | 218.5890429 | 5.080815585 | 9.70E-22    | 43.02243198 |
| PRKCA        | NM_002737    | 65.92975012 | 7.394372686 | 0.000193989 | 8.916206002 |
| VPS41        | NM_014396    | 87.53190005 | 3.070997575 | 3.36E-08    | 28.50275779 |
| PCSK5        | NM_001190482 | 237.5736822 | 3.858427481 | 1.47E-22    | 61.57267005 |
| AP5Z1        | NM_014855    | 152.1077322 | 13.35508488 | 1.01E-10    | 11.38949948 |
| PGM2         | NM_018290    | 270.2176143 | 4.967733144 | 9.53E-27    | 54.39455109 |
| SLC38A6      | NR_033344    | 136.2220179 | 3.084647688 | 2.24E-13    | 44.16128897 |
| TIMMDC1      | NM_016589    | 184.9121358 | 5.236548631 | 1.41E-17    | 35.31183396 |
| PPP6C        | NM_001123369 | 108.4220179 | 4.357601404 | 1.21E-09    | 24.88112332 |
| TRIP4        | NM_016213    | 183.8791608 | 5.595204422 | 6.72E-17    | 32.86370737 |
| IGF2BP2      | NM_001291869 | 84.43297501 | 5.167983936 | 5.70E-07    | 16.33770075 |
| FZD5         | NM_003468    | 64.73630363 | 10.79304612 | 0.000733664 | 5.997964144 |
| PRRC2C       | NM_015172    | 117.3978501 | 5.304014448 | 4.53E-10    | 22.13377268 |
| ADORA2B      | NM_000676    | 69.74070721 | 12.77316753 | 0.000928606 | 5.459938348 |
| HSPA4        | NM_002154    | 170.0593965 | 6.209614787 | 7.60E-15    | 27.38646476 |
| C14orf132    | NM_001282463 | 165.9274965 | 8.234637999 | 4.72E-14    | 20.14994423 |
| TECPR1       | NM_015395    | 87.69237152 | 7.672179542 | 1.11E-06    | 11.4299165  |
| CYSTM1       | NM_032412    | 97.54070721 | 9.772538231 | 1.20E-06    | 9.981102648 |
| CSTF2        | NM_001325    | 65.60880717 | 2.921308901 | 1.55E-06    | 22.45870238 |
| ADNP2        | NM_014913    | 57.8264215  | 6.524588805 | 0.000190246 | 8.862845342 |
| GINS2        | NM_016095    | 129.3121358 | 21.67380789 | 5.94E-07    | 5.966285964 |
| FGD6         | NM_018351    | 137.0945215 | 4.536555043 | 5.30E-12    | 30.2199621  |

|              |              |             |             |             |             |
|--------------|--------------|-------------|-------------|-------------|-------------|
| PP7080       | NR_024158    | 201.6703536 | 29.95722282 | 8.03E-11    | 6.731944239 |
| CUL1         | NM_003592    | 160.9230929 | 6.481659653 | 2.97E-14    | 24.82745184 |
| ATP6V1H      | NM_015941    | 135.3495144 | 5.054500186 | 1.02E-11    | 26.77802144 |
| FUBP1        | NM_003902    | 127.4066572 | 4.420876816 | 4.76E-12    | 28.81931855 |
| MLH3         | NM_001040108 | 70.77368223 | 7.375268877 | 4.37E-05    | 9.596081636 |
| ZNF468       | NR_102299    | 110.4879679 | 10.21002355 | 2.41E-08    | 10.8215194  |
| DEPTOR       | NM_001283012 | 96.34726073 | 7.098068994 | 2.97E-07    | 13.57372841 |
| FKBP4        | NM_002014    | 136.2220179 | 19.75609754 | 2.55E-08    | 6.895188569 |
| RAB3GAP2     | NM_012414    | 124.3077322 | 4.311467372 | 6.25E-11    | 28.83188517 |
| RTCA-AS1     | NR_110435    | 177.8417822 | 12.32876768 | 3.27E-12    | 14.4249439  |
| SF3B3        | NM_012426    | 133.2835644 | 13.02439836 | 2.54E-09    | 10.23337591 |
| TOB2         | NM_016272    | 379.3516643 | 27.54535167 | 1.02E-27    | 13.77189403 |
| CCNL2        | NM_030937    | 159.0176143 | 13.03481827 | 6.82E-12    | 12.19945004 |
| ANKRD18DP    | NR_003291    | 112.3934465 | 3.565439108 | 1.15E-10    | 31.5230307  |
| FCHSD2       | NM_014824    | 78.55606789 | 3.109083918 | 5.17E-07    | 25.26662836 |
| LOC729732    | NR_047662    | 79.74951438 | 6.09273232  | 1.90E-06    | 13.08928576 |
| SLC37A3      | NM_001287498 | 106.3560679 | 6.95566716  | 3.38E-08    | 15.29056314 |
| CAMLG        | NM_001745    | 217.5560679 | 6.980597858 | 3.58E-21    | 31.16582165 |
| SDE2         | NM_152608    | 181.1011787 | 10.16799674 | 8.48E-15    | 17.81090054 |
| ALKBH3       | NM_139178    | 176.0967751 | 6.40364971  | 1.08E-15    | 27.49943908 |
| UMPS         | NR_033434    | 256.5583215 | 12.12519649 | 1.20E-21    | 21.1591063  |
| TEN1-CDK3    | NR_037709    | 119.4638001 | 20.77233294 | 1.90E-06    | 5.75110174  |
| NSMCE4A      | NM_001167865 | 260.5297501 | 14.56437401 | 7.94E-21    | 17.88815296 |
| CNNM3        | NM_017623    | 244.3230929 | 17.28264444 | 3.00E-18    | 14.13690444 |
| TRAF1        | NM_001190945 | 78.71653937 | 7.960702517 | 6.10E-06    | 9.888139797 |
| PSMD14       | NM_005805    | 200.6373786 | 3.068444267 | 4.86E-20    | 65.38733024 |
| SNRNP48      | NM_152551    | 209.7736822 | 6.487677569 | 4.17E-20    | 32.33417197 |
| RPL10A       | NM_007104    | 301.1165394 | 49.14648864 | 1.77E-14    | 6.126918681 |
| FTX          | NR_028379    | 105.3230929 | 3.341019498 | 7.68E-10    | 31.52423772 |
| DDX56        | NM_001257189 | 130.1846393 | 24.36339848 | 8.81E-07    | 5.343451549 |
| IFI30        | NM_006332    | 235.5077322 | 17.54530854 | 7.08E-18    | 13.42283219 |
| TOMM7        | NM_019059    | 160.9230929 | 11.19730285 | 1.76E-12    | 14.37159422 |
| PDP1         | NM_001161779 | 219.4615464 | 25.14850774 | 2.50E-14    | 8.726623014 |
| DAPK3        | NM_001348    | 96.5077322  | 13.76914071 | 7.56E-06    | 7.008987286 |
| CLN5         | NM_006493    | 236.3802357 | 12.74147447 | 5.87E-20    | 18.5520315  |
| TRAK2        | NM_015049    | 131.2176143 | 4.862337987 | 1.19E-11    | 26.98652679 |
| LOC100507002 | NR_110801    | 99.60665724 | 14.60726866 | 3.57E-06    | 6.818978931 |
| TPR          | NM_003292    | 185.9451108 | 3.274147533 | 4.80E-19    | 56.79191573 |
| PRRG4        | NM_024081    | 79.5890429  | 3.578956444 | 5.77E-07    | 22.23805854 |
| MRPS7        | NM_015971    | 218.7495144 | 33.41605272 | 2.82E-12    | 6.546240401 |
| FEM1A        | NM_018708    | 98.7341537  | 5.220087208 | 5.24E-09    | 18.91427284 |
| LOC100129973 | NR_102751    | 75.61761433 | 5.057396786 | 3.01E-06    | 14.95188484 |
| AATF         | NM_012138    | 121.3692786 | 5.661944293 | 2.47E-10    | 21.43597188 |
| MITD1        | NM_138798    | 171.9648751 | 3.735423255 | 1.57E-18    | 46.03624899 |
| CYTH2        | NM_004228    | 133.1230929 | 28.44427246 | 2.36E-06    | 4.680137031 |
| KNTC1        | NM_014708    | 188.8835644 | 6.149735204 | 3.94E-17    | 30.71409713 |
| YTHDF3-AS1   | NR_102684    | 254.3319    | 16.06903784 | 3.61E-12    | 15.82745044 |
| POLB         | NM_002690    | 244.4835644 | 5.818358952 | 1.27E-23    | 42.01933335 |
| RAB27B       | NM_004163    | 114.4593965 | 2.280240247 | 2.07E-11    | 50.19620046 |
| C9orf163     | NM_152571    | 165.9274965 | 39.35269372 | 1.89E-06    | 4.216420295 |
| DTX3L        | NM_138287    | 61.95832155 | 5.088727455 | 1.99E-05    | 12.17560227 |
| WDR37        | NM_014023    | 99.28571429 | 5.884161451 | 1.88E-08    | 16.87338376 |
| ECHDC2       | NM_001198962 | 122.2417822 | 5.59359955  | 1.74E-10    | 21.85386728 |
| ZNF780B      | NM_001005851 | 101.5121358 | 6.841580936 | 3.17E-08    | 14.83752611 |
| RNF149       | NM_173647    | 169.0264215 | 6.132497264 | 4.87E-15    | 27.56241287 |
| GXYLT1       | NM_173601    | 133.1230929 | 2.484974409 | 1.24E-13    | 53.5712128  |
| C7orf73      | NM_001130929 | 296.1121358 | 6.762596922 | 2.56E-30    | 43.78674927 |
| PYROXD1      | NM_024854    | 119.1428571 | 5.110201568 | 6.35E-11    | 23.31470796 |
| CKAP2L       | NM_152515    | 65.76927864 | 7.183733021 | 0.000125068 | 9.155306642 |
| FANCE        | NM_021922    | 155.0461858 | 8.413268593 | 2.95E-13    | 18.42876928 |
| SHCBP1       | NM_024745    | 155.0461858 | 3.566990644 | 7.20E-15    | 43.4669449  |
| TTF2         | NM_003594    | 72.67916077 | 6.736691136 | 4.42E-05    | 10.78855469 |



|              |              |             |             |             |             |
|--------------|--------------|-------------|-------------|-------------|-------------|
| ELMSAN1      | NM_001043318 | 53.69452145 | 11.35115854 | 0.004818122 | 4.730311998 |
| LINC00476    | NR_023389    | 199.7648751 | 32.29645262 | 1.20E-10    | 6.185350367 |
| ZNF184       | NM_007149    | 87.53190005 | 5.117765541 | 8.11E-08    | 17.10353852 |
| A3GALT2      | NM_001080438 | 72.67916077 | 9.061684326 | 0.000110424 | 8.020491352 |
| MAML3        | NM_018717    | 83.72094295 | 5.008118601 | 1.17E-06    | 16.71704479 |
| PELI1        | NM_020651    | 210.6461858 | 3.971567028 | 1.03E-20    | 53.03855739 |
| RAB6B        | NM_016577    | 98.41321075 | 9.291630724 | 2.55E-07    | 10.59159728 |
| CDC37        | NM_007065    | 198.8923715 | 11.36931051 | 1.73E-16    | 17.4937936  |
| ANKRD34A     | NM_001039888 | 175.9363036 | 11.34854186 | 1.84E-14    | 15.50298759 |
| PDIA3        | NM_005313    | 310.0923715 | 8.589150939 | 1.38E-29    | 36.10279686 |
| VPS9D1-AS1   | NR_036480    | 204.9297501 | 26.74314161 | 2.68E-12    | 7.662889913 |
| FBXO5        | NM_012177    | 117.5583215 | 4.737283218 | 7.06E-11    | 24.81555696 |
| ZNF503       | NR_120651    | 96.5077322  | 9.739655854 | 2.94E-07    | 9.908741505 |
| NUP98        | NM_005387    | 95.47475719 | 7.273974358 | 4.59E-07    | 13.12552842 |
| PREB         | NM_013388    | 167.9934465 | 16.85762137 | 2.45E-11    | 9.965430044 |
| FAM133DP     | NR_034169    | 206.6747572 | 2.835248294 | 3.22E-22    | 72.89476468 |
| TIMM10B      | NM_012192    | 117.3978501 | 10.49083467 | 2.15E-08    | 11.1905157  |
| IRF9         | NM_006084    | 119.4638001 | 23.99403955 | 1.00E-05    | 4.978894857 |
| N4BP2        | NM_018177    | 151.0747572 | 2.798209876 | 5.77E-15    | 53.98978771 |
| MFAP1        | NM_005926    | 118.4308251 | 9.171598604 | 6.09E-09    | 12.91277892 |
| CLPP         | NM_006012    | 66.80225365 | 11.18453007 | 0.000806488 | 5.972736737 |
| MTM1         | NM_000252    | 118.2703536 | 2.636561177 | 2.44E-11    | 44.85780745 |
| CCT6P3       | NR_033416    | 112.232975  | 6.156580017 | 5.22E-09    | 18.22975982 |
| NUDC         | NM_006600    | 178.8747572 | 12.52175802 | 4.60E-14    | 14.28511531 |
| SLC9A1       | NM_003047    | 98.57368223 | 11.35350087 | 6.57E-07    | 8.682227922 |
| LOC102723373 | NR_119378    | 47.81761433 | 3.127437328 | 0.000429074 | 15.28971145 |
| C3orf38      | NM_173824    | 204.7692786 | 10.00215384 | 1.79E-18    | 20.47251841 |
| IDI2-AS1     | NR_024628    | 53.85499293 | 9.202799259 | 0.001322521 | 5.852023    |
| BUD13        | NM_032725    | 107.3890429 | 6.857500097 | 7.12E-09    | 15.66008624 |
| ME1          | NM_002395    | 97.38023574 | 1.925876726 | 4.05E-09    | 50.56410642 |
| C15orf61     | NM_001143936 | 135.3495144 | 9.402901727 | 1.01E-10    | 14.39444103 |
| IFI6         | NM_002038    | 164.0220179 | 11.15111868 | 4.60E-13    | 14.70901912 |
| NHP2L1       | NM_001003796 | 196.8264215 | 16.02531085 | 1.36E-14    | 12.28222175 |
| FAM27B       | NR_027422    | 90.63082508 | 13.64187638 | 0.000110348 | 6.643574724 |
| PRPF19       | NM_014502    | 148.2967751 | 8.471883667 | 1.65E-12    | 17.50458115 |
| C5orf24      | NM_001135586 | 329.7890429 | 9.243248072 | 6.63E-32    | 35.6789129  |
| CCNF         | NM_001761    | 132.2505893 | 22.60564327 | 2.40E-07    | 5.850335148 |
| ALDH1A3      | NM_001293815 | 164.0220179 | 13.39000265 | 4.40E-12    | 12.24958816 |
| NAB1         | NM_005966    | 38.84178218 | 3.4590091   | 0.001570756 | 11.2291645  |
| THAP7        | NM_030573    | 279.1934465 | 63.46703628 | 7.39E-11    | 4.399030786 |
| NEK5         | NM_199289    | 62.83082508 | 4.239063526 | 6.03E-05    | 14.82186447 |
| UBE2Q2P1     | NR_003661    | 89.59785007 | 2.059584148 | 6.46E-09    | 43.50288391 |
| PCYOX1       | NM_016297    | 233.4417822 | 11.45305105 | 8.08E-20    | 20.38249731 |
| SRBD1        | NM_018079    | 200.7978501 | 3.531392179 | 2.78E-19    | 56.86081859 |
| OSER1        | NM_016470    | 96.34726073 | 7.108533036 | 5.43E-08    | 13.55374734 |
| RSL1D1       | NM_015659    | 239.4791608 | 12.138999   | 5.28E-20    | 19.72808143 |
| YIPF2        | NM_024029    | 88.40440358 | 10.66539134 | 3.56E-06    | 8.288903873 |
| BCAM         | NM_001013257 | 135.1890429 | 9.658461536 | 2.28E-10    | 13.99695411 |
| TNFRSF1A     | NM_001065    | 141.06595   | 22.15477006 | 7.70E-08    | 6.367294701 |
| KCNN4        | NM_002250    | 60.60440358 | 9.047088507 | 0.001155259 | 6.698774256 |
| SCAF8        | NM_014892    | 122.2417822 | 5.814470001 | 1.26E-10    | 21.02371878 |
| PRR19        | NM_199285    | 134.1560679 | 13.94292188 | 4.53E-09    | 9.62180446  |
| TMEM234      | NM_019118    | 72.67916077 | 17.90826917 | 0.002139938 | 4.058413466 |
| C19orf66     | NM_018381    | 74.7451108  | 8.640972277 | 2.73E-05    | 8.650081079 |
| TMEM45A      | NM_018004    | 66.80225365 | 3.664388704 | 5.39E-06    | 18.23012214 |
| IL12A        | NM_000882    | 61.79785007 | 4.816136183 | 4.85E-05    | 12.83141666 |
| SLC4A1AP     | NM_018158    | 283.0044036 | 7.963166037 | 4.52E-26    | 35.53918156 |
| STARD4       | NM_139164    | 117.2373786 | 2.004583249 | 4.35E-13    | 58.48466442 |
| PAPSS2       | NM_001015880 | 79.5890429  | 6.022815433 | 1.74E-06    | 13.21459105 |
| PCF11        | NM_015885    | 218.7495144 | 13.28061905 | 4.81E-17    | 16.47133417 |
| GSTCD        | NM_024751    | 164.8945215 | 2.279378445 | 2.16E-16    | 72.34187979 |
| HIGD2B       | NR_002780    | 80.62201792 | 5.994414978 | 1.57E-06    | 13.4495223  |

|           |              |             |             |             |             |
|-----------|--------------|-------------|-------------|-------------|-------------|
| KBTBD7    | NM_032138    | 113.4264215 | 4.164912255 | 3.31E-11    | 27.23380819 |
| C1QL4     | NM_001008223 | 148.1363036 | 30.71162748 | 7.98E-07    | 4.8234599   |
| GPR137C   | NM_001099652 | 41.78023574 | 3.881633751 | 0.000954769 | 10.76356978 |
| ASS1      | NM_000050    | 68.54726073 | 9.450527985 | 9.41E-05    | 7.253273133 |
| ZDHHC5    | NM_015457    | 144.1648751 | 12.7829265  | 2.81E-10    | 11.27792412 |
| KIAA1407  | NM_020817    | 49.88356436 | 3.675720984 | 0.000271735 | 13.57109655 |
| SMG9      | NM_019108    | 177.8417822 | 13.24717286 | 8.89E-14    | 13.42488575 |
| LCOR      | NM_032440    | 42.81321075 | 3.741607852 | 0.000995585 | 11.44246336 |
| JUP       | NM_021991    | 265.3736822 | 8.780174673 | 5.79E-24    | 30.22419167 |
| DDX60L    | NM_001012967 | 56.79344649 | 3.767597553 | 4.19E-05    | 15.07418074 |
| SNX8      | NM_013321    | 88.40440358 | 6.94156426  | 1.37E-06    | 12.73551613 |
| SDHA      | NM_001294332 | 67.67475719 | 9.324686604 | 8.61E-05    | 7.257590529 |
| RPL23     | NM_000978    | 295.9516643 | 34.32270439 | 5.93E-18    | 8.622620787 |
| CCDC88A   | NM_001254943 | 124.1472607 | 3.692167282 | 1.08E-11    | 33.62449511 |
| PEX12     | NM_000286    | 119.3033286 | 23.73630158 | 5.39E-06    | 5.026197035 |
| BNIP3L    | NM_004331    | 149.1692786 | 2.922875025 | 5.45E-15    | 51.03512034 |
| MPLKIP    | NM_138701    | 223.5934465 | 6.826052711 | 1.94E-20    | 32.75589216 |
| MYO5B     | NM_001080467 | 57.8264215  | 5.9920125   | 0.000261763 | 9.650584257 |
| TBCE      | NM_001287801 | 190.7890429 | 6.971687579 | 1.91E-16    | 27.36626402 |
| RIC1      | NM_001206557 | 80.62201792 | 3.969360497 | 2.43E-07    | 20.31108487 |
| BDP1      | NM_018429    | 166.0879679 | 4.074136318 | 5.27E-15    | 40.76642384 |
| GLOD4     | NM_016080    | 145.1978501 | 5.238127193 | 3.38E-13    | 27.71942046 |
| GADD45A   | NM_001924    | 303.8945215 | 44.54307675 | 2.59E-16    | 6.822486089 |
| RND1      | NM_014470    | 203.7363036 | 11.54086647 | 8.12E-17    | 17.65346684 |
| UBE2V2    | NM_003350    | 110.3274965 | 7.345409876 | 8.76E-09    | 15.01992378 |
| EPB41L5   | NM_001184937 | 223.753918  | 3.932905658 | 1.74E-20    | 56.89277532 |
| PPIL3     | NM_130906    | 184.7516643 | 7.226063558 | 1.07E-16    | 25.56740095 |
| SH2D5     | NM_001103160 | 73.55166431 | 11.03533615 | 6.43E-05    | 6.665104109 |
| NOMO1     | NM_014287    | 137.2549929 | 8.502382001 | 3.64E-11    | 16.14312235 |
| WDR89     | NM_080666    | 157.1121358 | 5.196271998 | 1.21E-14    | 30.23554884 |
| PRKG1-AS1 | NR_038277    | 61.79785007 | 2.915583078 | 2.67E-06    | 21.19570886 |
| EXOG      | NM_001145464 | 170.9319    | 4.855807224 | 7.94E-17    | 35.20154161 |
| DNAJA1    | NM_001539    | 359.6549929 | 16.15688561 | 1.89E-30    | 22.26016831 |
| ARPC3     | NM_001287222 | 112.3934465 | 11.81664966 | 1.02E-07    | 9.511447809 |
| RNF144B   | NM_182757    | 130.1846393 | 3.613955044 | 8.25E-13    | 36.02276114 |
| BLOC1S6   | NM_012388    | 173.8703536 | 5.902740946 | 2.70E-16    | 29.45586723 |
| ZC3H15    | NM_018471    | 131.2176143 | 5.054571308 | 1.50E-12    | 25.9601866  |
| TM7SF3    | NM_016551    | 76.49011787 | 6.016028246 | 2.48E-06    | 12.71438809 |
| LLPH      | NM_032338    | 195.7934465 | 11.33035437 | 1.67E-16    | 17.2804345  |
| XRCC1     | NM_006297    | 92.53630363 | 8.480321295 | 5.76E-07    | 10.91188652 |
| RAPH1     | NM_203365    | 107.3890429 | 4.344924065 | 2.56E-09    | 24.71597692 |
| ACER3     | NM_001300955 | 250.3604715 | 3.615290705 | 1.06E-24    | 69.25043985 |
| MRPL16    | NM_017840    | 203.8967751 | 23.79781332 | 9.23E-13    | 8.567878585 |
| MYO1D     | NM_015194    | 46.78463932 | 2.972790323 | 0.000566242 | 15.73761828 |
| KLHL23    | NM_144711    | 93.40880717 | 4.514862648 | 1.06E-08    | 20.68918026 |
| HYOU1     | NM_006389    | 102.3846393 | 13.25152932 | 6.19E-07    | 7.726250822 |
| TFB1M     | NM_016020    | 139.1604715 | 4.29111932  | 9.28E-13    | 32.42987694 |
| CIR1      | NM_004882    | 61.79785007 | 3.469189344 | 7.98E-06    | 17.81334022 |
| NUP133    | NM_018230    | 290.0747572 | 6.968987856 | 9.53E-27    | 41.62365658 |
| C5orf22   | NM_018356    | 181.8132108 | 6.570600974 | 4.63E-17    | 27.67071254 |
| CLOCK     | NM_004898    | 268.1516643 | 4.97570651  | 3.34E-25    | 53.89217868 |
| RBM12B    | NM_203390    | 284.1978501 | 15.11639542 | 2.14E-23    | 18.80063614 |
| TNFSF9    | NM_003811    | 128.4396323 | 19.72982425 | 3.66E-07    | 6.509922777 |
| FAM207A   | NM_058190    | 59.89237152 | 9.232842505 | 0.000482018 | 6.486883264 |
| ACSL3     | NM_004457    | 195.7934465 | 4.436520683 | 2.11E-18    | 44.1322064  |
| BAG4      | NM_001204878 | 130.3451108 | 7.600231177 | 6.74E-11    | 17.1501508  |
| KPNA1     | NM_002264    | 196.8264215 | 5.413681662 | 4.06E-18    | 36.35722117 |
| AZIN2     | NM_052998    | 146.0703536 | 9.600789235 | 2.47E-11    | 15.21441103 |
| TBC1D25   | NM_002536    | 100.3186893 | 5.173300298 | 4.90E-09    | 19.39162305 |
| LINC01347 | NR_029401    | 53.69452145 | 2.470140972 | 5.02E-05    | 21.73743202 |
| HMOX1     | NM_002133    | 199.7648751 | 11.26719726 | 2.16E-16    | 17.72977525 |
| LINC01192 | NR_033945    | 32.80440358 | 0.696481828 | 0.001507771 | 47.10015719 |

|                |              |             |             |             |             |
|----------------|--------------|-------------|-------------|-------------|-------------|
| APOPT1         | NM_032374    | 65.76927864 | 4.907445548 | 2.32E-05    | 13.40193752 |
| MMD            | NM_012329    | 159.1780858 | 8.974458691 | 5.32E-13    | 17.73678963 |
| C2orf44        | NM_025203    | 187.8505893 | 6.339895778 | 3.11E-18    | 29.62991758 |
| WIPF2          | NM_133264    | 131.3780858 | 8.310811806 | 1.27E-10    | 15.80809299 |
| HPS6           | NM_024747    | 217.7165394 | 21.89410966 | 1.83E-14    | 9.944069103 |
| MYL9           | NM_006097    | 101.3516643 | 6.821106841 | 3.79E-08    | 14.8585364  |
| C9orf142       | NM_183241    | 134.1560679 | 30.29904715 | 4.19E-05    | 4.427732239 |
| SAT1           | NM_002970    | 183.7186893 | 23.00545121 | 3.55E-11    | 7.985876373 |
| FAM206A        | NM_017832    | 117.2373786 | 12.20578907 | 2.30E-08    | 9.605063463 |
| ATP5H          | NM_006356    | 265.3736822 | 20.57085073 | 1.29E-19    | 12.90047192 |
| STAG1          | NM_005862    | 67.67475719 | 3.524218532 | 3.73E-06    | 19.2027698  |
| FAM118B        | NM_024556    | 266.4066572 | 7.824792305 | 2.49E-24    | 34.04648288 |
| DUSP12         | NM_007240    | 181.1011787 | 8.733314104 | 5.58E-16    | 20.73682184 |
| SCRIB          | NM_015356    | 58.69892504 | 14.33725209 | 0.004175322 | 4.094154491 |
| CDKAL1         | NM_017774    | 119.3033286 | 2.763698734 | 3.69E-11    | 43.16799338 |
| LOC101929567   | NR_110257    | 142.098925  | 6.996622529 | 1.75E-12    | 20.30964575 |
| FAM72D         | NM_207418    | 116.5253465 | 7.480626594 | 5.26E-10    | 15.57695002 |
| UBTD2          | NM_152277    | 84.43297501 | 4.967055024 | 4.28E-07    | 16.99859869 |
| LINC01322      | NR_125764    | 37.80880717 | 1.511064712 | 0.003427142 | 25.02130243 |
| MYO1E          | NM_004998    | 260.3692786 | 7.248617977 | 1.88E-22    | 35.91985113 |
| HABP4          | NM_014282    | 142.098925  | 6.499891378 | 4.41E-12    | 21.86173842 |
| BLOC1S5-TXNDC5 | NR_037616    | 137.0945215 | 4.5868238   | 6.31E-12    | 29.88876997 |
| COPG1          | NM_016128    | 198.7319    | 9.90357891  | 4.66E-17    | 20.06667507 |
| NCAPH2         | NM_014551    | 160.9230929 | 12.65117014 | 3.89E-12    | 12.72001649 |
| SIMC1          | NM_198567    | 55.76047148 | 4.21016669  | 0.000230507 | 13.24424318 |
| SIX1           | NM_005982    | 107.3890429 | 12.59856668 | 3.32E-07    | 8.523909552 |
| PLEKHN1        | NM_001160184 | 167.120943  | 10.81130829 | 1.78E-13    | 15.4579759  |
| FAM117B        | NM_173511    | 89.4373786  | 2.703313114 | 2.77E-08    | 33.08435791 |
| TMED2          | NM_006815    | 208.5802357 | 9.117254687 | 1.48E-18    | 22.8775265  |
| SRGAP3         | NM_014850    | 77.68356436 | 6.654045032 | 3.91E-06    | 11.67463761 |
| LOC100506023   | NR_037845    | 101.3516643 | 4.380191346 | 2.58E-08    | 23.13863855 |
| TPH2           | NR_002187    | 209.6132108 | 21.01356867 | 1.74E-13    | 9.97513626  |
| SLC35A5        | NM_017945    | 178.8747572 | 5.551890147 | 4.54E-17    | 32.21871335 |
| PKP2           | NM_004572    | 167.832975  | 2.65617352  | 8.29E-17    | 63.1859981  |
| MLXIP          | NM_014938    | 126.2132108 | 4.659073209 | 6.26E-11    | 27.08976766 |
| CERS5          | NM_147190    | 93.40880717 | 8.298404848 | 3.37E-07    | 11.25623645 |
| TMEM14A        | NM_014051    | 172.1253465 | 7.267518878 | 2.35E-15    | 23.68419669 |
| LOC101927415   | NR_110049    | 95.63522867 | 19.23858455 | 0.000205283 | 4.971011689 |
| DDX11-AS1      | NR_038927    | 154.0132108 | 8.348935309 | 6.40E-13    | 18.44704804 |
| EXPH5          | NM_015065    | 42.97368223 | 5.202637622 | 0.004292862 | 8.259979908 |
| TOLLIP         | NM_019009    | 74.58463932 | 9.058927688 | 2.53E-05    | 8.233274609 |
| EDEM3          | NM_025191    | 124.1472607 | 2.968941967 | 3.50E-12    | 41.81532077 |
| CYP2R1         | NM_024514    | 200.6373786 | 11.30735799 | 3.01E-16    | 17.74396625 |
| CFDP1          | NM_006324    | 151.0747572 | 6.13920697  | 2.57E-13    | 24.60818766 |
| DHRS7B         | NM_015510    | 159.1780858 | 7.00752596  | 1.79E-13    | 22.71530448 |
| NUDT19         | NM_001105570 | 88.72534654 | 8.40159553  | 8.06E-07    | 10.56053534 |
| MCCC2          | NM_022132    | 199.6044036 | 5.165777321 | 1.09E-18    | 38.63976149 |
| MOSPD2         | NM_152581    | 61.6373786  | 1.850706212 | 5.11E-06    | 33.3047883  |
| ACTR3B         | NM_020445    | 96.34726073 | 5.918026353 | 3.99E-08    | 16.28030275 |
| CD9            | NM_001769    | 138.1274965 | 11.38549099 | 1.88E-10    | 12.13188755 |
| FAM168B        | NM_001009993 | 142.098925  | 12.8380369  | 3.73E-10    | 11.06858675 |
| PAPD5          | NM_001040284 | 126.2132108 | 5.721743422 | 5.68E-11    | 22.05852333 |
| GNAI1          | NM_002069    | 193.7274965 | 3.7702269   | 3.00E-18    | 51.38351128 |
| PSMB4          | NM_002796    | 122.4022537 | 16.72850443 | 2.78E-07    | 7.316987252 |
| GALK1          | NM_000154    | 165.2154644 | 17.75622782 | 5.58E-11    | 9.304648829 |
| OTULIN         | NM_138348    | 116.2044036 | 6.450359415 | 1.41E-09    | 18.01518274 |
| MTERF2         | NM_001033050 | 180.9407072 | 6.847914933 | 1.22E-16    | 26.42274458 |
| USH1C          | NM_153676    | 141.06595   | 10.17057412 | 1.18E-10    | 13.87000856 |
| MED10          | NM_032286    | 103.4176143 | 9.19758814  | 9.73E-08    | 11.24399275 |
| LOC283788      | NR_027436    | 217.1649788 | 3.064272572 | 2.52E-22    | 70.869994   |
| RIPK4          | NM_020639    | 164.8945215 | 9.44297699  | 1.35E-13    | 17.46213314 |
| ACVR1          | NM_001111067 | 42.81321075 | 5.515607556 | 0.004434817 | 7.76219307  |

|                        |              |             |             |             |             |
|------------------------|--------------|-------------|-------------|-------------|-------------|
| NEIL3                  | NM_018248    | 245.3560679 | 3.686275132 | 1.05E-24    | 66.55934762 |
| RBM26-AS1              | NR_038991    | 138.2879679 | 6.427469643 | 2.76E-12    | 21.51514914 |
| RAVER1                 | NM_133452    | 99.44618576 | 18.43331859 | 2.08E-05    | 5.394914935 |
| PHGDH                  | NM_006623    | 84.59344649 | 11.03951285 | 9.99E-06    | 7.66278799  |
| TBC1D8B                | NM_198881    | 85.46595002 | 1.329891251 | 7.06E-09    | 64.26536754 |
| 5-Mar                  | NM_017824    | 123.4352287 | 5.423449067 | 8.15E-11    | 22.75954418 |
| INPP5B                 | NM_001297434 | 169.898925  | 5.830295747 | 2.36E-15    | 29.14070442 |
| MAD2L1                 | NM_002358    | 174.0308251 | 6.649223123 | 8.19E-17    | 26.17310652 |
| TOP2A                  | NM_001067    | 200.7978501 | 6.297561196 | 1.34E-18    | 31.88501768 |
| SYDE2                  | NM_032184    | 43.84618576 | 3.13205772  | 0.000799926 | 13.99916275 |
| FAM212B-AS1            | NR_038952    | 60.92534654 | 10.71230579 | 0.002551388 | 5.687416672 |
| CMC2                   | NM_020188    | 223.5934465 | 7.654273253 | 1.05E-19    | 29.21158405 |
| LOC389906              | NR_034031    | 108.2615464 | 7.431171357 | 8.63E-09    | 14.56857085 |
| THAP9                  | NM_024672    | 130.3451108 | 6.812136465 | 1.68E-11    | 19.13424833 |
| DERL2                  | NM_016041    | 118.2703536 | 8.537485577 | 1.97E-09    | 13.85306629 |
| NDFIP1                 | NM_030571    | 224.6264215 | 4.865687316 | 3.62E-22    | 46.16540417 |
| LOC440434              | NR_036750    | 152.9802357 | 7.95921961  | 7.19E-13    | 19.22050694 |
| ZNF527                 | NM_032453    | 32.96487506 | 1.735645199 | 0.003621382 | 18.99286506 |
| TRIM24                 | NM_003852    | 177.8417822 | 3.756189437 | 2.74E-17    | 47.34632935 |
| AAAS                   | NM_001173466 | 139.1604715 | 10.86786356 | 1.06E-10    | 12.80476799 |
| P4HTM                  | NM_177938    | 107.3890429 | 19.52769472 | 4.14E-06    | 5.49932004  |
| TPRG1-AS1              | NR_046873    | 63.8638001  | 3.521346516 | 3.77E-06    | 18.13618734 |
| NUP62CL                | NM_017681    | 77.52309288 | 1.741622859 | 2.24E-07    | 44.51198633 |
| LOC100506022           | NR_104622    | 100.4791608 | 17.1041977  | 2.83E-05    | 5.874532235 |
| VPS37A                 | NM_152415    | 287.1363036 | 3.843150634 | 2.56E-29    | 74.71377809 |
| C2orf15                | NM_144706    | 59.73190005 | 5.806934014 | 0.000187204 | 10.28630598 |
| PIGF                   | NM_002643    | 151.0747572 | 3.638016351 | 1.04E-14    | 41.52668449 |
| DHX9                   | NM_001357    | 202.7033286 | 9.279596036 | 7.78E-17    | 21.84398198 |
| DPAGT1                 | NM_001382    | 74.58463932 | 18.61113886 | 0.002830437 | 4.007526883 |
| AP2B1                  | NM_001282    | 155.0461858 | 4.207206411 | 9.76E-14    | 36.8525265  |
| KLHL42                 | NM_020782    | 68.7077322  | 3.253481668 | 9.58E-07    | 21.1182171  |
| SPINT2                 | NM_001166103 | 144.1648751 | 14.41176273 | 1.24E-09    | 10.00327841 |
| MRPL13                 | NM_014078    | 398.3363036 | 7.199407959 | 2.98E-39    | 55.32903621 |
| NCAPD2                 | NM_014865    | 105.4835644 | 11.17390385 | 1.66E-07    | 9.440171118 |
| TIAL1                  | NM_001033925 | 274.3495144 | 10.42484326 | 3.14E-24    | 26.31689586 |
| METTL3                 | NM_019852    | 197.8593965 | 11.83620597 | 5.39E-16    | 16.71645433 |
| APC                    | NM_001127511 | 230.5033286 | 4.185713238 | 1.85E-21    | 55.0690684  |
| RAB14                  | NM_016322    | 80.62201792 | 3.493634341 | 4.52E-07    | 23.07683348 |
| KDM5B                  | NM_006618    | 110.4879679 | 3.885790026 | 1.08E-09    | 28.43384928 |
| CTSO                   | NM_001334    | 59.73190005 | 4.096790984 | 7.97E-05    | 14.58016781 |
| XPR1                   | NM_001135669 | 226.5319    | 2.459032795 | 5.16E-22    | 92.12235823 |
| ICAM5                  | NM_003259    | 136.2220179 | 27.61363388 | 1.70E-06    | 4.933143479 |
| ABT1                   | NM_013375    | 118.5912966 | 14.37691157 | 8.79E-08    | 8.24873242  |
| WHAMMP2                | NR_026589    | 48.85058935 | 3.541474105 | 0.0008018   | 13.79385756 |
| IPMK                   | NM_152230    | 85.6264215  | 2.951884149 | 4.02E-08    | 29.00737874 |
| C9orf40                | NM_017998    | 175.9363036 | 17.35813721 | 1.95E-12    | 10.13566729 |
| CDCP1                  | NM_022842    | 206.8352287 | 8.390927474 | 6.66E-18    | 24.64986491 |
| SAAL1                  | NM_138421    | 150.2022537 | 5.791233635 | 1.46E-13    | 25.93614127 |
| HSD17B12               | NM_016142    | 84.59344649 | 4.208649406 | 5.42E-07    | 20.0999034  |
| TM9SF3                 | NM_020123    | 45.75166431 | 4.628051815 | 0.002319547 | 9.885728625 |
| PIH1D1                 | NM_017916    | 104.6110608 | 18.14453377 | 6.14E-06    | 5.765431184 |
| HARBI1                 | NM_173811    | 140.1934465 | 10.43470491 | 9.21E-11    | 13.43530534 |
| STAG3L5P-PVRIG2P-PILRB | NR_036569    | 267.1186893 | 18.4887806  | 3.47E-20    | 14.44760988 |
| DDX58                  | NM_014314    | 46.9451108  | 4.510102449 | 0.002320026 | 10.40887903 |
| RAP2C-AS1              | NR_110410    | 58.69892504 | 1.535037284 | 2.04E-05    | 38.23941324 |
| QTRT1                  | NM_031209    | 100.6396323 | 7.093548226 | 1.76E-08    | 14.18748827 |
| UBE2Z                  | NM_023079    | 249.3274965 | 23.12612502 | 2.40E-17    | 10.78120508 |
| PKN3                   | NM_013355    | 82.84843942 | 18.32189497 | 0.00048175  | 4.521827002 |
| DDX5                   | NM_004396    | 215.6505893 | 28.15902858 | 1.19E-12    | 7.658310681 |
| BMS1                   | NM_014753    | 273.1560679 | 7.235202343 | 2.52E-25    | 37.75375656 |
| COQ6                   | NM_182476    | 223.5934465 | 14.72940789 | 1.28E-17    | 15.18007025 |
| STAG3L1                | NR_040583    | 443.0549929 | 43.97289866 | 1.24E-28    | 10.07563764 |

|              |              |             |             |             |             |
|--------------|--------------|-------------|-------------|-------------|-------------|
| ABHD17B      | NM_001025780 | 243.6110608 | 3.964857974 | 1.52E-24    | 61.4425693  |
| RBM14-RBM4   | NM_001198846 | 288.1692786 | 24.634892   | 6.76E-20    | 11.69760674 |
| ZNF500       | NM_021646    | 119.3033286 | 9.783944042 | 2.47E-09    | 12.19378689 |
| PRPF31       | NM_015629    | 151.0747572 | 13.55367681 | 8.04E-11    | 11.14640399 |
| SENP2        | NM_021627    | 152.1077322 | 5.636544211 | 5.77E-14    | 26.98599115 |
| HEATR5A      | NM_015473    | 248.2945215 | 3.896839631 | 2.33E-23    | 63.71689495 |
| HDAC6        | NM_006044    | 95.47475719 | 3.777330343 | 1.20E-08    | 25.27572347 |
| HNRNPM       | NM_005968    | 128.4396323 | 11.23354968 | 1.37E-09    | 11.43357495 |
| PIGW         | NM_178517    | 201.6703536 | 17.6075403  | 1.18E-14    | 11.45363578 |
| LRRCC1       | NM_033402    | 190.9495144 | 2.523697745 | 3.56E-21    | 75.66259262 |
| TBC1D32      | NR_104452    | 122.4022537 | 2.03388697  | 1.13E-11    | 60.18144344 |
| COL20A1      | NM_020882    | 41.78023574 | 5.467864065 | 0.003896936 | 7.641052382 |
| ERLIN1       | NM_001100626 | 171.252843  | 6.423241719 | 3.44E-15    | 26.66143522 |
| PROSER3      | NM_001039887 | 107.3890429 | 11.32599838 | 1.11E-07    | 9.481640321 |
| TAF13        | NM_005645    | 160.0505893 | 9.861204018 | 3.24E-13    | 16.23032939 |
| ITGB1BP1     | NM_022334    | 116.2044036 | 11.32753535 | 3.25E-08    | 10.25857788 |
| CNTNAP3      | NM_033655    | 53.69452145 | 2.21298773  | 7.98E-05    | 24.26336157 |
| ABHD5        | NM_016006    | 304.9274965 | 4.762716504 | 1.88E-31    | 64.02386037 |
| FBXL12       | NM_017703    | 246.3890429 | 14.78271285 | 2.89E-20    | 16.66737664 |
| TTC7A        | NM_001288953 | 146.2308251 | 11.95530423 | 6.80E-11    | 12.23145997 |
| ARHGAP42     | NM_152432    | 83.56047148 | 3.375068555 | 1.44E-07    | 24.75815531 |
| TICAM1       | NM_182919    | 121.5297501 | 7.1190588   | 9.72E-11    | 17.07104177 |
| CYR61        | NM_001554    | 206.6747572 | 25.0638723  | 2.73E-12    | 8.245922846 |
| SUPV3L1      | NM_003171    | 142.098925  | 7.080073455 | 2.68E-12    | 20.07026141 |
| GJC3         | NM_181538    | 89.4373786  | 9.635819953 | 3.36E-06    | 9.281761078 |
| MNX1-AS1     | NR_038835    | 125.3407072 | 14.58022647 | 4.42E-08    | 8.596622795 |
| POLR3A       | NM_007055    | 97.54070721 | 9.637066933 | 1.11E-06    | 10.12141016 |
| BMS1P4       | NR_026592    | 311.8373786 | 5.463981057 | 1.19E-31    | 57.07146041 |
| SAP18        | NM_005870    | 129.4726073 | 13.61433024 | 3.85E-09    | 9.510023995 |
| ELK3         | NM_005230    | 79.42857143 | 9.87894251  | 3.83E-05    | 8.040189661 |
| TMEM80       | NM_174940    | 102.3846393 | 17.82229405 | 6.46E-06    | 5.744750874 |
| VTI1B        | NM_006370    | 147.1033286 | 9.197417476 | 1.05E-11    | 15.9939819  |
| GPR39        | NM_001508    | 43.84618576 | 2.163671226 | 0.000996559 | 20.26471732 |
| MRPL1        | NM_020236    | 143.2923715 | 3.463692715 | 5.44E-14    | 41.3698279  |
| APOOL        | NM_198450    | 35.74285714 | 1.886694643 | 0.003049891 | 18.94469636 |
| ZRANB2-AS2   | NR_046217    | 27.96047148 | 0.921610507 | 0.003377544 | 30.33870735 |
| NFATC2IP     | NM_032815    | 112.3934465 | 14.07702411 | 4.83E-07    | 7.984176598 |
| ABHD17C      | NM_021214    | 57.66595002 | 7.186270441 | 0.00088405  | 8.024461437 |
| PAPOLG       | NM_022894    | 165.9274965 | 3.9455213   | 7.40E-16    | 42.05464471 |
| TMEM5        | NM_014254    | 177.8417822 | 5.795518588 | 3.46E-16    | 30.68608606 |
| STARD7       | NM_020151    | 323.0396323 | 13.81456231 | 9.40E-28    | 23.38399329 |
| TTC3         | NM_001001894 | 107.3890429 | 5.550968287 | 3.45E-09    | 19.34600188 |
| LASP1        | NR_073384    | 209.6132108 | 13.97804923 | 3.33E-16    | 14.99588442 |
| LOC100506207 | NR_038979    | 192.6945215 | 2.245928075 | 1.48E-18    | 85.7972807  |
| KIAA0753     | NM_014804    | 67.67475719 | 5.677908883 | 1.89E-05    | 11.91895794 |
| KHK          | NM_006488    | 113.26595   | 11.62446852 | 4.53E-08    | 9.743752997 |
| TTC27        | NM_001193509 | 49.72309288 | 3.368088404 | 0.000293347 | 14.76300112 |
| GNG7         | NM_052847    | 89.4373786  | 6.624337589 | 3.22E-07    | 13.50133163 |
| SDAD1        | NM_001288984 | 116.3648751 | 5.100833845 | 1.75E-10    | 22.81291228 |
| SFT2D2       | NM_199344    | 165.9274965 | 10.92117316 | 3.60E-13    | 15.19319345 |
| ZNF267       | NM_001265588 | 148.1363036 | 2.405217956 | 8.07E-16    | 61.58955503 |
| NOL7         | NM_016167    | 241.5451108 | 15.30040083 | 8.25E-20    | 15.78684856 |
| HS3ST1       | NM_005114    | 190.7890429 | 6.816329308 | 1.79E-17    | 27.98999788 |
| HCFC1        | NM_005334    | 48.69011787 | 8.210545784 | 0.004077296 | 5.930192602 |
| GNB1L        | NM_053004    | 204.7692786 | 11.1770757  | 9.24E-17    | 18.32046987 |
| NCLN         | NM_020170    | 92.53630363 | 10.82929812 | 2.54E-06    | 8.54499549  |
| FAM3C        | NM_001040020 | 226.5319    | 3.243675172 | 5.69E-23    | 69.83803496 |
| ZNF425       | NM_001001661 | 251.3934465 | 11.60447006 | 1.49E-21    | 21.6635008  |
| MTMR6        | NM_004685    | 109.4549929 | 2.496732985 | 4.21E-11    | 43.83928662 |
| MSX2         | NM_002449    | 209.7736822 | 13.97751373 | 2.17E-16    | 15.00793963 |
| MRFAP1L1     | NM_203462    | 85.6264215  | 19.07835515 | 0.000567146 | 4.488144856 |
| GRPEL1       | NM_025196    | 226.5319    | 17.23269678 | 3.57E-17    | 13.14547009 |

|              |              |             |             |             |             |
|--------------|--------------|-------------|-------------|-------------|-------------|
| ANXA3        | NM_005139    | 106.3560679 | 6.943071886 | 3.19E-08    | 15.31830142 |
| P2RY2        | NM_176072    | 54.0154644  | 11.10818598 | 0.004247748 | 4.862671952 |
| LANCL1       | NM_001136574 | 176.9692786 | 4.028741288 | 4.09E-17    | 43.92669223 |
| SUB1         | NM_006713    | 143.1319    | 6.166880791 | 6.07E-13    | 23.20977247 |
| ARL3         | NM_004311    | 125.3407072 | 10.8261989  | 2.33E-09    | 11.57753597 |
| KATNBL1      | NM_024713    | 105.4835644 | 4.90603475  | 4.31E-09    | 21.50077807 |
| TIMM22       | NM_013337    | 178.8747572 | 14.14572634 | 1.19E-13    | 12.64514475 |
| ANTXR1       | NM_053034    | 122.2417822 | 4.18332883  | 1.36E-10    | 29.22117461 |
| SCPEP1       | NM_021626    | 223.5934465 | 14.02247252 | 2.92E-17    | 15.94536528 |
| UQCRFS1      | NM_006003    | 107.5495144 | 3.497725165 | 1.39E-11    | 30.7484177  |
| LPCAT2       | NM_017839    | 129.3121358 | 2.269148401 | 7.12E-13    | 56.98707751 |
| FOPNL        | NM_144600    | 130.1846393 | 5.534679494 | 1.52E-11    | 23.52162207 |
| AUNIP        | NM_001287490 | 147.1033286 | 7.912390986 | 1.54E-12    | 18.5915141  |
| TLR5         | NM_003268    | 113.4264215 | 8.630054294 | 3.62E-09    | 13.14318747 |
| ATP6V0E2-AS1 | NR_027040    | 80.62201792 | 17.54094929 | 0.000430763 | 4.59621749  |
| GTF2F2       | NM_004128    | 134.3165394 | 3.613365492 | 8.63E-13    | 37.17214316 |
| POP4         | NR_027368    | 106.3560679 | 10.30609141 | 1.80E-07    | 10.31972875 |
| FBXL17       | NM_001163315 | 233.6022537 | 2.442053944 | 2.00E-22    | 95.65810542 |
| UGCG         | NM_003358    | 64.57583215 | 5.926252823 | 2.94E-05    | 10.89657058 |
| TPMT         | NM_000367    | 69.90117869 | 6.344392814 | 1.37E-05    | 11.01778858 |
| RPL13AP5     | NR_026712    | 313.9033286 | 65.86329279 | 1.90E-13    | 4.765982922 |
| SHISA4       | NR_030775    | 202.7033286 | 14.60117819 | 1.15E-15    | 13.88266932 |
| MIS18A       | NM_018944    | 165.9274965 | 4.068943601 | 9.28E-18    | 40.77901115 |
| MLLT4-AS1    | NR_027906    | 124.1472607 | 22.92611237 | 3.74E-06    | 5.415103036 |
| CFAP20       | NM_013242    | 131.2176143 | 10.37246053 | 9.11E-10    | 12.65057736 |
| GPRC5A       | NM_003979    | 86.49892504 | 12.41386765 | 3.21E-05    | 6.967927118 |
| MGA          | NM_001164273 | 127.4066572 | 3.47881081  | 2.24E-12    | 36.62362348 |
| DNAJB11      | NM_016306    | 109.4549929 | 7.018788995 | 3.19E-09    | 15.59456952 |
| ERP29        | NM_006817    | 131.2176143 | 25.28652533 | 1.01E-06    | 5.189230731 |
| FAM71E1      | NM_138411    | 217.8770108 | 11.45199554 | 4.06E-18    | 19.02524412 |
| C11orf58     | NM_014267    | 118.4308251 | 4.567489315 | 3.20E-11    | 25.9290864  |
| LINC00612    | NR_034140    | 168.153918  | 5.754724476 | 1.26E-16    | 29.22015097 |
| CLCC1        | NM_001048210 | 201.6703536 | 7.612088332 | 2.19E-18    | 26.49343318 |
| CDR2L        | NM_014603    | 117.5583215 | 17.66467612 | 7.45E-07    | 6.654994449 |
| LRP4-AS1     | NR_038909    | 156.2396323 | 11.3353364  | 8.49E-12    | 13.7834138  |
| C19orf44     | NM_032207    | 98.41321075 | 12.76088204 | 3.44E-06    | 7.71210097  |
| ERCC6-PGBD3  | NM_001277058 | 229.4703536 | 11.15647124 | 3.41E-19    | 20.5683633  |
| 2-Mar        | NM_017898    | 178.8747572 | 8.95096323  | 7.49E-15    | 19.98385566 |
| TMEM2        | NM_013390    | 295.9516643 | 5.245388705 | 1.51E-28    | 56.42130277 |
| IL15         | NM_172175    | 63.8638001  | 1.943648185 | 8.60E-06    | 32.85769544 |
| SYCP2L       | NM_001040274 | 41.94070721 | 3.13396303  | 0.000930733 | 13.38264262 |
| FUT10        | NM_032664    | 179.9077322 | 5.165624323 | 2.36E-16    | 34.82787771 |
| MAGEA3       | NM_005362    | 51.62857143 | 7.56785852  | 0.002070977 | 6.822084648 |
| RSPRY1       | NM_133368    | 128.2791608 | 7.224831095 | 1.85E-10    | 17.75531623 |
| POLE4        | NM_019896    | 124.1472607 | 3.620776655 | 2.95E-12    | 34.28746718 |
| LOC101927746 | NR_110115    | 246.3890429 | 19.67330639 | 5.43E-18    | 12.52402814 |
| SPR          | NM_003124    | 170.219868  | 7.341666354 | 7.97E-16    | 23.18545406 |
| SDHAF2       | NM_017841    | 148.1363036 | 9.029573922 | 2.22E-12    | 16.40568037 |
| MAOB         | NM_000898    | 87.37142857 | 1.832811342 | 1.92E-08    | 47.67071578 |
| CSRNP1       | NM_033027    | 106.5165394 | 16.58722922 | 4.72E-06    | 6.421599289 |
| ITFG1        | NM_030790    | 193.8879679 | 3.034201846 | 1.25E-18    | 63.90081405 |
| F8A1         | NM_012151    | 319.9407072 | 31.14400317 | 2.32E-19    | 10.27294743 |
| ZEB1-AS1     | NR_024284    | 123.2747572 | 13.79732305 | 5.75E-08    | 8.934686587 |
| CDK2AP2      | NR_073484    | 165.0549929 | 8.022747945 | 1.80E-13    | 20.57337387 |
| PPRC1        | NM_001288727 | 258.3033286 | 19.88475168 | 1.37E-18    | 12.99002033 |
| ZNF449       | NM_152695    | 61.6373786  | 1.62549765  | 1.15E-06    | 37.91908195 |
| TMEM97       | NM_014573    | 82.68796794 | 5.846276028 | 6.22E-07    | 14.14369892 |
| AAMP         | NM_001087    | 158.1451108 | 16.76607783 | 1.81E-10    | 9.432445228 |
| NOL11        | NM_015462    | 186.1055823 | 7.909360618 | 6.11E-16    | 23.52978847 |
| STK35        | NM_080836    | 161.0835644 | 11.02825302 | 1.48E-12    | 14.60644438 |
| GPR20        | NM_005293    | 116.3648751 | 9.864680485 | 1.07E-08    | 11.79611192 |
| WASH7P       | NR_024540    | 46.78463932 | 5.907369735 | 0.001658006 | 7.919707318 |

|             |              |             |             |             |             |
|-------------|--------------|-------------|-------------|-------------|-------------|
| SIK2        | NM_015191    | 101.3516643 | 5.487392842 | 2.27E-08    | 18.46991226 |
| TRMT6       | NM_001281467 | 157.9846393 | 9.224301054 | 7.38E-13    | 17.12700381 |
| PTPLB       | NM_198402    | 209.6132108 | 5.45826063  | 2.75E-19    | 38.4029318  |
| PHC3        | NM_024947    | 110.4879679 | 3.527945606 | 1.16E-10    | 31.31793408 |
| RPS6        | NM_001010    | 215.6505893 | 25.49854529 | 3.99E-13    | 8.457368328 |
| MPV17       | NM_002437    | 152.1077322 | 11.92707657 | 7.94E-12    | 12.75314461 |
| GCA         | NM_012198    | 86.65939651 | 3.206275416 | 5.66E-08    | 27.02805757 |
| PWP1        | NM_007062    | 123.4352287 | 4.522523842 | 1.49E-11    | 27.29343901 |
| TMEM192     | NM_001100389 | 188.0110608 | 8.475938719 | 9.50E-16    | 22.18173904 |
| ARSK        | NM_198150    | 104.4505893 | 1.727044684 | 6.02E-11    | 60.47937862 |
| C1orf145    | NR_073154    | 123.1142857 | 11.78287734 | 1.25E-08    | 10.44857569 |
| C9orf3      | NM_032823    | 187.8505893 | 6.137554153 | 1.12E-16    | 30.60675061 |
| VPS18       | NM_020857    | 120.3363036 | 12.62840176 | 3.06E-08    | 9.529020847 |
| PFN2        | NM_002628    | 82.52749646 | 9.438822213 | 1.16E-05    | 8.743410417 |
| B2M         | NM_004048    | 229.6308251 | 15.86101995 | 3.46E-18    | 14.47768339 |
| POLR2C      | NM_032940    | 128.2791608 | 17.9568672  | 1.12E-07    | 7.143738346 |
| SUGP1       | NM_172231    | 169.898925  | 11.54955159 | 2.14E-13    | 14.71043475 |
| CDC123      | NM_006023    | 166.9604715 | 7.778467595 | 4.35E-14    | 21.46444264 |
| ZNF100      | NM_173531    | 126.2132108 | 1.228587749 | 3.96E-14    | 102.7303185 |
| STRIP2      | NM_020704    | 217.5560679 | 6.577533218 | 1.84E-19    | 33.07563195 |
| KCTD21-AS1  | NR_102281    | 88.56487506 | 9.132551147 | 1.17E-06    | 9.697714651 |
| GJB2        | NM_004004    | 96.34726073 | 15.71596574 | 9.93E-06    | 6.130533898 |
| DDX18       | NM_006773    | 120.3363036 | 6.929825021 | 2.49E-10    | 17.36498444 |
| CEP85L      | NM_206921    | 123.2747572 | 3.58306148  | 1.21E-11    | 34.40486798 |
| EME2        | NM_001257370 | 167.9934465 | 26.23251251 | 5.02E-09    | 6.404016634 |
| ELAC1       | NM_018696    | 204.7692786 | 6.577083947 | 5.86E-19    | 31.13374868 |
| SGTA        | NM_003021    | 118.4308251 | 10.92774196 | 1.12E-08    | 10.83763009 |
| LIN9        | NM_001270409 | 36.93630363 | 4.140680722 | 0.003329605 | 8.920345737 |
| DDIAS       | NM_145018    | 137.2549929 | 3.22209659  | 2.43E-13    | 42.59803798 |
| VSNL1       | NM_003385    | 65.60880717 | 6.049064884 | 4.01E-05    | 10.84610736 |
| GOLGA3      | NM_001172557 | 72.67916077 | 8.112717294 | 4.78E-05    | 8.95867046  |
| ZNFX1       | NM_021035    | 152.1077322 | 10.13037474 | 5.56E-12    | 15.01501535 |
| PPAPDC2     | NM_203453    | 258.3033286 | 24.04380886 | 2.72E-17    | 10.7430287  |
| TPM3P9      | NR_003148    | 140.1934465 | 9.816004338 | 6.30E-11    | 14.28212964 |
| ARIH1       | NM_005744    | 147.1033286 | 5.081311329 | 6.89E-13    | 28.94987516 |
| GDE1        | NM_016641    | 217.7165394 | 6.075177536 | 1.97E-21    | 35.83706618 |
| FOSL2       | NM_005253    | 119.3033286 | 10.59319156 | 4.25E-09    | 11.26226481 |
| MAP4K5      | NM_006575    | 58.85939651 | 2.849673409 | 2.03E-05    | 20.65478673 |
| GINS3       | NM_001126130 | 65.76927864 | 6.468772253 | 7.65E-05    | 10.1671965  |
| LOC256880   | NR_002799    | 122.2417822 | 19.33266112 | 1.87E-06    | 6.323070654 |
| FUCA1       | NM_000147    | 162.1165394 | 6.860030229 | 9.93E-15    | 23.63204446 |
| TRUB1       | NM_139169    | 204.9297501 | 5.262968516 | 4.44E-20    | 38.93805359 |
| MFN1        | NM_033540    | 145.0373786 | 2.655478615 | 2.91E-15    | 54.61816855 |
| FPGT-TNNI3K | NM_001199327 | 124.3077322 | 1.282302972 | 3.94E-12    | 96.94099986 |
| TOR1A       | NM_000113    | 197.698925  | 17.87323952 | 3.71E-14    | 11.06116912 |
| SYT16       | NM_031914    | 33.8373786  | 0.996529881 | 0.00077355  | 33.95520721 |
| KITLG       | NM_003994    | 235.5077322 | 4.89289923  | 4.57E-22    | 48.13255314 |
| ITGA5       | NM_002205    | 149.1692786 | 9.827109208 | 6.19E-12    | 15.17936511 |
| CKS1B       | NR_024163    | 122.4022537 | 20.50154289 | 1.17E-06    | 5.970392293 |
| NANP        | NM_152667    | 188.7230929 | 7.592253184 | 3.81E-17    | 24.85732342 |
| TRA2B       | NM_004593    | 187.6901179 | 16.03806047 | 2.81E-13    | 11.702794   |
| ABCB6       | NM_005689    | 232.4088072 | 21.49997078 | 2.51E-16    | 10.80972665 |
| TAF9        | NM_003187    | 147.1033286 | 21.34596969 | 3.03E-08    | 6.891386558 |
| ABCE1       | NM_002940    | 138.2879679 | 4.698953662 | 6.29E-13    | 29.42952365 |
| KCNMB4      | NM_014505    | 45.75166431 | 3.901088656 | 0.000491332 | 11.72792221 |
| MZT2A       | NM_001085365 | 104.2901179 | 15.29502769 | 2.95E-06    | 6.81856352  |
| GPR180      | NM_180989    | 188.8835644 | 1.513795928 | 8.41E-23    | 124.7747869 |
| TP53INP1    | NM_001135733 | 90.47035361 | 10.45363083 | 2.46E-06    | 8.65444314  |
| SNAP29      | NM_004782    | 190.7890429 | 7.60686211  | 3.02E-17    | 25.08117541 |
| METTL8      | NM_024770    | 193.7274965 | 3.838850865 | 6.39E-18    | 50.46497071 |
| HSPBAP1     | NM_024610    | 181.8132108 | 3.451938335 | 1.01E-17    | 52.66988952 |
| FER         | NM_005246    | 80.46154644 | 2.485857634 | 2.77E-07    | 32.36772104 |

|              |              |             |             |             |             |
|--------------|--------------|-------------|-------------|-------------|-------------|
| HPS3         | NM_032383    | 150.2022537 | 4.926972729 | 4.16E-14    | 30.48570835 |
| CDK11A       | NM_024011    | 139.1604715 | 9.551582653 | 3.58E-11    | 14.56936264 |
| MTAP         | NM_002451    | 218.5890429 | 7.066486566 | 1.71E-19    | 30.93320009 |
| GGA2         | NM_015044    | 52.82201792 | 7.998634083 | 0.002622523 | 6.603879783 |
| SIRT4        | NM_012240    | 54.88796794 | 11.52640093 | 0.003445883 | 4.761934646 |
| GNMT         | NM_018960    | 56.79344649 | 9.186311712 | 0.001678519 | 6.182399234 |
| PARGP1       | NR_029388    | 127.2461858 | 1.594645309 | 8.02E-13    | 79.79591764 |
| CCDC150      | NM_001080539 | 119.3033286 | 3.201707754 | 1.34E-11    | 37.26240425 |
| MTERF3       | NM_001286643 | 364.498925  | 8.4655774   | 9.10E-36    | 43.05659352 |
| SASS6        | NM_194292    | 99.60665724 | 1.527443734 | 2.07E-10    | 65.21134298 |
| TBK1         | NM_013254    | 101.5121358 | 4.070212285 | 5.21E-09    | 24.94025586 |
| NUDT6        | NM_007083    | 150.0417822 | 4.495261019 | 1.15E-14    | 33.37776862 |
| PLOD1        | NM_000302    | 188.8835644 | 9.610290686 | 1.56E-15    | 19.65430293 |
| ZNF282       | NM_003575    | 135.1890429 | 8.954675555 | 2.13E-10    | 15.09703418 |
| RITA1        | NM_032848    | 200.6373786 | 16.17104962 | 7.10E-15    | 12.40719578 |
| AIFM2        | NM_001198696 | 132.2505893 | 10.6431996  | 2.93E-10    | 12.42583005 |
| ASCC3        | NM_022091    | 210.8066572 | 5.772279493 | 2.28E-20    | 36.52052148 |
| MFSD9        | NM_032718    | 237.4132108 | 4.84522132  | 1.17E-24    | 48.99945639 |
| INTS3        | NM_023015    | 147.9758322 | 12.67764687 | 1.10E-10    | 11.67218441 |
| STAG3L3      | NR_040582    | 192.6945215 | 9.771778304 | 1.15E-16    | 19.71949378 |
| COG1         | NM_018714    | 205.8022537 | 25.68284224 | 6.29E-13    | 8.013219553 |
| CCDC176      | NM_025057    | 47.81761433 | 5.276838609 | 0.001233511 | 9.061792084 |
| LOC389641    | NR_033928    | 146.3912966 | 14.01183722 | 3.35E-10    | 10.4476875  |
| BLM          | NM_001287246 | 174.9033286 | 4.922560685 | 7.79E-16    | 35.53096444 |
| MEIG1        | NM_001080836 | 171.8044036 | 17.63296565 | 2.03E-11    | 9.743364051 |
| PIGH         | NM_004569    | 160.0505893 | 9.398899541 | 2.20E-13    | 17.02865199 |
| VPRBP        | NM_001171904 | 58.69892504 | 7.202113171 | 0.000539397 | 8.150236415 |
| KIAA2018     | NM_001009899 | 108.2615464 | 6.002530093 | 1.94E-09    | 18.03598562 |
| THAP10       | NM_020147    | 147.2638001 | 2.157592824 | 3.98E-18    | 68.25374949 |
| ABCA11P      | NR_002451    | 190.7890429 | 9.1727298   | 1.04E-15    | 20.7995926  |
| AK7          | NM_152327    | 77.52309288 | 5.341393282 | 3.23E-06    | 14.51364631 |
| PMM1         | NM_002676    | 155.0461858 | 11.05097593 | 2.81E-12    | 14.0300899  |
| PKN2-AS1     | NR_110682    | 36.93630363 | 3.923250214 | 0.003472301 | 9.41472035  |
| RND3         | NM_001254738 | 84.59344649 | 13.78248226 | 3.14E-05    | 6.137751159 |
| COX6B1       | NM_001863    | 103.4176143 | 13.99799684 | 1.91E-06    | 7.388029554 |
| EEPD1        | NM_030636    | 195.632975  | 7.285195821 | 2.10E-16    | 26.85349575 |
| MND1         | NM_032117    | 129.3121358 | 5.28307404  | 2.38E-11    | 24.47668437 |
| ENDOG        | NM_004435    | 181.8132108 | 34.67991652 | 5.45E-09    | 5.242608085 |
| EEF2K        | NM_013302    | 182.8461858 | 7.469280834 | 1.48E-15    | 24.4797578  |
| LSM11        | NM_173491    | 89.59785007 | 8.540305973 | 2.17E-06    | 10.49117565 |
| PDLIM1       | NM_020992    | 72.67916077 | 6.529141147 | 1.00E-05    | 11.131504   |
| C12orf73     | NM_001135570 | 184.9121358 | 11.29279022 | 2.11E-15    | 16.37435322 |
| NUFIP1       | NM_012345    | 86.49892504 | 4.629876537 | 3.27E-07    | 18.68277142 |
| KCNK5        | NM_003740    | 122.4022537 | 10.7002134  | 4.25E-09    | 11.43923481 |
| WEE2-AS1     | NR_015392    | 47.81761433 | 3.599764049 | 0.00020499  | 13.28354128 |
| NEK8         | NM_178170    | 68.7077322  | 8.010351365 | 4.82E-05    | 8.577368092 |
| LOC100132057 | NR_111930    | 269.3451108 | 17.53978968 | 1.40E-20    | 15.35623378 |
| POLQ         | NM_199420    | 121.3692786 | 4.549747017 | 2.24E-10    | 26.67604994 |
| C12orf29     | NM_001009894 | 241.5451108 | 6.557780582 | 2.49E-24    | 36.83336272 |
| NPAT         | NM_002519    | 127.4066572 | 6.327605651 | 2.63E-11    | 20.13505017 |
| ROGDI        | NM_024589    | 95.47475719 | 10.09957504 | 8.03E-07    | 9.453344006 |
| YBEY         | NM_001006114 | 161.9560679 | 19.7937133  | 2.74E-10    | 8.182197319 |
| FBXO15       | NM_152676    | 89.4373786  | 2.289523524 | 1.56E-08    | 39.06375176 |
| PRPF4        | NM_004697    | 238.4461858 | 9.591101342 | 4.42E-21    | 24.86118927 |
| DPY19L2P3    | NR_036482    | 89.4373786  | 7.357501832 | 1.14E-06    | 12.15594378 |
| UACA         | NM_018003    | 135.3495144 | 3.323162533 | 5.36E-13    | 40.72912867 |
| ZNF658       | NM_033160    | 146.2308251 | 4.196305765 | 1.14E-14    | 34.84751428 |
| MAN2B2       | NM_015274    | 128.2791608 | 10.51931885 | 1.37E-09    | 12.19462615 |
| MIR31HG      | NR_027054    | 122.2417822 | 6.080131875 | 1.33E-10    | 20.1051202  |
| NUP155       | NM_001278312 | 111.3604715 | 6.16007107  | 1.50E-09    | 18.07779005 |
| RBX1         | NM_014248    | 173.8703536 | 10.88201305 | 8.95E-14    | 15.97777478 |
| AHCTF1       | NM_015446    | 43.84618576 | 4.714331912 | 0.004275629 | 9.300614928 |



|              |              |             |             |             |             |
|--------------|--------------|-------------|-------------|-------------|-------------|
| RHEB         | NM_005614    | 80.78248939 | 9.240442882 | 8.78E-06    | 8.742274632 |
| PLIN2        | NM_001122    | 68.7077322  | 10.75073889 | 0.000198005 | 6.390977669 |
| GALNT6       | NM_007210    | 70.77368223 | 9.255457474 | 4.78E-05    | 7.64669736  |
| ACVR2B-AS1   | NR_028389    | 73.71213579 | 12.91091188 | 0.000206834 | 5.709289669 |
| RAB4A        | NM_001271998 | 167.9934465 | 7.764802431 | 9.82E-15    | 21.6352506  |
| METTTL10     | NM_212554    | 279.1934465 | 7.950687022 | 1.21E-25    | 35.11563789 |
| ACTL6A       | NM_178042    | 121.2088072 | 6.367249745 | 4.31E-10    | 19.03628914 |
| METTTL16     | NM_024086    | 103.4176143 | 5.502358539 | 1.08E-08    | 18.79514278 |
| LOC283335    | NR_033854    | 168.86595   | 39.56038    | 2.59E-07    | 4.268562385 |
| SCLY         | NM_016510    | 100.4791608 | 7.969866567 | 9.34E-08    | 12.60738306 |
| ZNF354B      | NM_058230    | 119.3033286 | 3.556727444 | 1.36E-11    | 33.54300561 |
| EIF2B5       | NM_003907    | 155.0461858 | 15.85994825 | 9.28E-11    | 9.775957858 |
| LINC00263    | NR_026762    | 211.6791608 | 12.63715472 | 3.36E-17    | 16.75053961 |
| LOC100507373 | NR_045214    | 209.7736822 | 14.68728751 | 1.14E-15    | 14.28267011 |
| CDH15        | NM_004933    | 85.46595002 | 15.0998741  | 0.000109559 | 5.660043884 |
| NSMCE1       | NM_145080    | 179.9077322 | 8.242429416 | 1.22E-15    | 21.82702734 |
| C21orf59     | NM_021254    | 270.3780858 | 14.71213295 | 1.61E-22    | 18.37789848 |
| SYNJ2        | NM_003898    | 122.2417822 | 7.736637674 | 1.14E-09    | 15.80037573 |
| CLDN3        | NM_001306    | 106.3560679 | 20.8585946  | 0.000147789 | 5.098908625 |
| PRH1         | NM_001291315 | 177.8417822 | 3.286636009 | 6.31E-17    | 54.11058046 |
| FEM1C        | NM_020177    | 86.49892504 | 2.53443022  | 6.59E-09    | 34.12953505 |
| CXCL16       | NM_001100812 | 68.54726073 | 11.37921108 | 0.000330936 | 6.023902733 |
| ATP5G1       | NM_001002027 | 260.5297501 | 30.17881293 | 1.21E-15    | 8.632869383 |
| ARHGAP31-AS1 | NR_046748    | 65.76927864 | 5.812069502 | 3.91E-05    | 11.31598282 |
| C8orf44      | NM_019607    | 102.5451108 | 9.092996298 | 9.15E-08    | 11.27737298 |
| RUNDC3B      | NM_001134405 | 83.56047148 | 1.838540548 | 1.07E-07    | 45.44934924 |
| HEXA-AS1     | NR_027262    | 170.9319    | 12.28018899 | 1.85E-13    | 13.91932162 |
| LRRRC8C      | NM_032270    | 125.1802357 | 3.496093046 | 3.41E-12    | 35.80575062 |
| FIG4         | NM_014845    | 166.9604715 | 4.586572801 | 7.57E-15    | 36.40201055 |
| MYEOV2       | NM_138336    | 83.56047148 | 11.56883784 | 2.98E-05    | 7.222892448 |
| FAM98B       | NM_173611    | 211.6791608 | 2.988913557 | 2.13E-22    | 70.82143955 |
| WDR43        | NM_015131    | 179.9077322 | 4.852857296 | 5.63E-17    | 37.07253711 |
| SPTSSA       | NM_138288    | 138.1274965 | 8.372779464 | 1.47E-11    | 16.49720945 |
| CNIH1        | NM_005776    | 118.4308251 | 4.875738542 | 1.22E-10    | 24.28982277 |
| PPM1D        | NM_003620    | 250.6814144 | 7.162974788 | 1.29E-22    | 34.99683049 |
| TALDO1       | NM_006755    | 112.3934465 | 22.3790358  | 7.87E-06    | 5.022264921 |
| C16orf87     | NM_001001436 | 44.00665724 | 2.905297193 | 0.000672935 | 15.14704153 |
| COMMD7       | NM_053041    | 83.56047148 | 5.934775982 | 6.53E-07    | 14.07980212 |
| EXOSC9       | NM_001034194 | 76.81106082 | 4.619605255 | 7.46E-07    | 16.62719141 |
| FDX1         | NM_004109    | 85.46595002 | 3.137186453 | 1.88E-08    | 27.24286596 |
| JAGN1        | NM_032492    | 219.4615464 | 15.25170454 | 4.11E-17    | 14.38931274 |
| ROCK1        | NM_005406    | 100.3186893 | 2.116537065 | 1.81E-09    | 47.39755847 |
| UTP6         | NM_018428    | 210.6461858 | 8.168919348 | 4.47E-18    | 25.78629765 |
| RAB21        | NM_014999    | 108.2615464 | 3.854445317 | 6.24E-10    | 28.08745164 |
| DNAJA2       | NM_005880    | 170.9319    | 7.965456327 | 6.57E-15    | 21.45914723 |
| SF3B2        | NM_006842    | 153.1407072 | 13.97179198 | 4.57E-11    | 10.96070622 |
| RCN1         | NM_002901    | 64.73630363 | 13.83748487 | 0.00131091  | 4.678328773 |
| RTKN2        | NM_145307    | 113.4264215 | 2.375975791 | 2.74E-11    | 47.7388793  |
| CISD2        | NM_001008388 | 242.4176143 | 7.350511658 | 1.61E-22    | 32.97969252 |
| TDRD3        | NM_001146071 | 231.3758322 | 2.96500963  | 8.93E-23    | 78.03544036 |
| DLX2         | NM_004405    | 91.50332862 | 11.24352097 | 6.70E-06    | 8.138316182 |
| MCOLN1       | NM_020533    | 123.2747572 | 10.24094045 | 3.40E-09    | 12.03744498 |
| FAM66B       | NR_027423    | 36.93630363 | 1.933999946 | 0.002729219 | 19.09839952 |
| AKR7A2       | NM_003689    | 94.44178218 | 18.10019416 | 4.01E-05    | 5.217722049 |
| PNKP         | NM_007254    | 136.2220179 | 28.92968043 | 1.65E-06    | 4.708728748 |
| ANKRD36      | NM_001164315 | 132.4110608 | 2.481792656 | 1.11E-12    | 53.35299084 |
| HSF1         | NM_005526    | 144.1648751 | 21.53217348 | 2.18E-08    | 6.695323869 |
| ACAT1        | NM_000019    | 189.7560679 | 10.69999833 | 5.17E-15    | 17.73421471 |
| SVIP         | NM_148893    | 224.46595   | 2.010669627 | 2.04E-29    | 111.6374103 |
| LRP10        | NM_014045    | 103.4176143 | 15.81729218 | 3.60E-06    | 6.538262882 |
| DICER1-AS1   | NR_015415    | 182.8461858 | 5.24604641  | 1.57E-17    | 34.8540923  |
| DEAF1        | NM_021008    | 54.72749646 | 11.08216987 | 0.004688062 | 4.938337628 |

|              |              |             |             |             |             |
|--------------|--------------|-------------|-------------|-------------|-------------|
| DNAJC25      | NR_037148    | 287.1363036 | 6.101822866 | 3.71E-28    | 47.05746298 |
| ERV3-1       | NM_001007253 | 232.4088072 | 8.650596351 | 7.94E-21    | 26.86621797 |
| POLR1D       | NM_152705    | 97.38023574 | 7.098165003 | 1.82E-07    | 13.71907186 |
| ZNF664       | NM_001204298 | 49.72309288 | 7.92637101  | 0.004458424 | 6.273122065 |
| PGLS         | NM_012088    | 140.1934465 | 17.435824   | 9.60E-09    | 8.040540355 |
| HP1BP3       | NM_016287    | 203.7363036 | 7.910384828 | 5.14E-18    | 25.75554895 |
| PIGX         | NM_017861    | 84.43297501 | 4.905815052 | 1.66E-07    | 17.21079456 |
| SNX18        | NM_001145427 | 154.1736822 | 4.071071573 | 3.45E-15    | 37.87054083 |
| RPF1         | NM_025065    | 133.2835644 | 6.967221774 | 8.34E-12    | 19.13008781 |
| INSIG2       | NM_016133    | 128.1186893 | 3.30112502  | 6.50E-13    | 38.81061411 |
| C17orf51     | NM_001113434 | 93.56927864 | 4.932714182 | 1.97E-08    | 18.96912636 |
| GDAP1        | NM_018972    | 208.9011787 | 6.978735518 | 1.42E-19    | 29.9339584  |
| LOC100130950 | NR_034082    | 87.53190005 | 6.537747697 | 1.11E-06    | 13.38869349 |
| EREG         | NM_001432    | 140.1934465 | 3.071440674 | 2.78E-14    | 45.64419808 |
| SLX4         | NM_032444    | 178.0022537 | 10.57765907 | 1.43E-14    | 16.82813301 |
| PLEKHM1P     | NR_024386    | 236.5407072 | 13.02117131 | 5.87E-19    | 18.16585479 |
| NGDN         | NM_015514    | 89.59785007 | 9.113694439 | 1.28E-06    | 9.831122896 |
| C12orf5      | NM_020375    | 152.1077322 | 3.895271931 | 1.66E-14    | 39.0493231  |
| TIA1         | NM_022037    | 201.6703536 | 5.807469098 | 1.45E-18    | 34.72603129 |
| DRG1         | NM_004147    | 211.6791608 | 9.220963695 | 4.65E-18    | 22.95629478 |
| CDR2         | NM_001802    | 62.67035361 | 5.141174028 | 4.63E-05    | 12.18989151 |
| LOC645513    | NR_037630    | 79.74951438 | 5.521344258 | 1.27E-06    | 14.44385835 |
| NAGPA        | NM_016256    | 96.5077322  | 7.624316871 | 1.25E-07    | 12.65788579 |
| ATP9B        | NM_198531    | 93.56927864 | 3.421897728 | 1.08E-08    | 27.34426511 |
| NANS         | NM_018946    | 239.3186893 | 10.28116736 | 2.32E-20    | 23.27738484 |
| ZNF391       | NM_001076781 | 90.63082508 | 6.420807912 | 1.44E-07    | 14.11517465 |
| ZNF624       | NM_020787    | 172.9978501 | 3.913964854 | 2.34E-17    | 44.20015419 |
| TTC21A       | NM_001105513 | 82.52749646 | 8.906629843 | 3.80E-06    | 9.265850037 |
| AMDHD1       | NM_152435    | 91.50332862 | 4.672981507 | 4.18E-08    | 19.58135903 |
| ANKIB1       | NM_019004    | 82.52749646 | 2.41750019  | 1.07E-07    | 34.13753464 |
| LAPTM4B      | NM_018407    | 134.3165394 | 9.245387224 | 8.39E-11    | 14.52795174 |
| IL10RB       | NM_000628    | 139.1604715 | 9.492690246 | 6.35E-11    | 14.6597506  |
| BNIP2        | NM_004330    | 78.55606789 | 6.705796174 | 1.02E-05    | 11.7146519  |
| DHX30        | NM_138615    | 105.4835644 | 14.32443761 | 8.58E-07    | 7.363888709 |
| ATP6V1C1     | NM_001695    | 199.7648751 | 6.954471687 | 1.11E-17    | 28.7246658  |
| C2orf47      | NM_024520    | 329.7890429 | 16.90312424 | 1.05E-27    | 19.51053771 |
| EFNA1        | NM_182685    | 230.5033286 | 21.32737834 | 2.84E-16    | 10.80786044 |
| ZSCAN25      | NM_145115    | 175.9363036 | 11.87077006 | 2.20E-14    | 14.82096804 |
| TIMM44       | NM_006351    | 98.41321075 | 13.5982319  | 2.79E-06    | 7.237206385 |
| FAM199X      | NM_207318    | 84.43297501 | 3.195200482 | 1.48E-08    | 26.42493812 |
| DEPDC4       | NM_152317    | 78.55606789 | 6.798454996 | 6.21E-06    | 11.55498829 |
| GEMIN4       | NM_015721    | 165.9274965 | 20.92188898 | 4.11E-10    | 7.930808572 |
| RTCB         | NM_014306    | 55.04843942 | 4.767518842 | 0.00028349  | 11.54655938 |
| STX16-NPEPL1 | NR_037945    | 228.5978501 | 10.3970955  | 5.02E-19    | 21.98670293 |
| SKIV2L2      | NM_015360    | 53.85499293 | 3.843280895 | 7.92E-05    | 14.01276524 |
| GFM1         | NM_024996    | 118.4308251 | 3.966598805 | 1.51E-10    | 29.85702132 |
| SLC30A3      | NM_003459    | 237.5736822 | 9.522120643 | 1.55E-21    | 24.94966102 |
| C22orf23     | NM_032561    | 105.4835644 | 13.34432631 | 9.72E-07    | 7.904750069 |
| EIF2D        | NM_006893    | 211.6791608 | 9.266303679 | 8.10E-19    | 22.84396973 |
| PCNP         | NM_020357    | 148.1363036 | 6.081730632 | 1.69E-13    | 24.3575904  |
| ACO2         | NM_001098    | 96.5077322  | 14.32981985 | 4.99E-06    | 6.734748463 |
| PGBD2        | NM_170725    | 156.9516643 | 9.027733719 | 7.17E-13    | 17.38549997 |
| RIC8B        | NM_018157    | 234.4747572 | 4.17690421  | 6.14E-22    | 56.13601495 |
| FNDC3A       | NR_103528    | 57.66595002 | 2.159306181 | 4.24E-05    | 26.70577731 |
| TMEM50A      | NM_014313    | 192.8549929 | 5.301128901 | 2.44E-18    | 36.37998557 |
| HAUS3        | NM_024511    | 192.6945215 | 5.840268341 | 1.81E-18    | 32.9941212  |
| PPIH         | NM_006347    | 120.3363036 | 10.02789957 | 3.11E-09    | 12.00015046 |
| BMPR1A       | NM_004329    | 63.54285714 | 4.603244716 | 7.44E-05    | 13.80392768 |
| GPATCH1      | NM_018025    | 104.4505893 | 8.030706169 | 3.14E-08    | 13.00640157 |
| RSF1         | NM_016578    | 110.4879679 | 4.510393005 | 1.80E-09    | 24.49630616 |
| C1orf106     | NM_018265    | 63.70332862 | 8.443932513 | 0.000233852 | 7.544272591 |
| CCDC24       | NM_152499    | 136.2220179 | 15.26872462 | 2.22E-09    | 8.92163696  |

|                |              |             |             |             |             |
|----------------|--------------|-------------|-------------|-------------|-------------|
| PINX1          | NM_017884    | 138.2879679 | 5.827761578 | 3.83E-12    | 23.7291739  |
| WDFY2          | NM_052950    | 120.3363036 | 4.00326152  | 2.65E-11    | 30.05956594 |
| DDX10          | NM_004398    | 71.80665724 | 2.88883513  | 1.83E-06    | 24.85661313 |
| TRAPPC9        | NM_001160372 | 228.5978501 | 6.720637351 | 2.55E-20    | 34.01431117 |
| DNAJC13        | NM_015268    | 129.3121358 | 3.25293332  | 2.32E-12    | 39.75247048 |
| LINC01144      | NR_024270    | 207.5472607 | 30.09122169 | 1.06E-10    | 6.89726934  |
| IPO5P1         | NR_103742    | 83.56047148 | 5.549816261 | 3.03E-07    | 15.05643927 |
| EMC7           | NM_020154    | 174.9033286 | 4.827322832 | 3.78E-17    | 36.23195189 |
| C6orf211       | NM_024573    | 58.85939651 | 4.458022817 | 5.84E-05    | 13.2030272  |
| LOC100130238   | NR_024563    | 56.79344649 | 9.175868499 | 0.0010852   | 6.189435528 |
| RTEL1-TNFRSF6B | NR_037882    | 123.2747572 | 28.79835372 | 1.11E-05    | 4.280618204 |
| RRP1B          | NM_015056    | 157.9846393 | 11.02270494 | 2.06E-12    | 14.33265611 |
| XPO5           | NM_020750    | 161.9560679 | 10.98152225 | 9.05E-13    | 14.74805261 |
| RAB11FIP5      | NM_015470    | 61.6373786  | 8.933120074 | 0.000274463 | 6.899871275 |
| LINC01504      | NR_110952    | 78.55606789 | 5.311713768 | 2.14E-06    | 14.7892133  |
| PM20D2         | NM_001010853 | 177.8417822 | 5.338853517 | 4.39E-17    | 33.31085627 |
| SHQ1           | NM_018130    | 203.5758322 | 4.650439939 | 9.10E-19    | 43.77560722 |
| ARID3B         | NM_006465    | 138.1274965 | 7.120760466 | 2.84E-11    | 19.39785745 |
| LOC643339      | NR_040096    | 126.2132108 | 4.966385295 | 1.04E-10    | 25.41349558 |
| KARS           | NM_001130089 | 144.1648751 | 7.691600331 | 9.54E-12    | 18.74315732 |
| ADD3-AS1       | NR_038943    | 208.7407072 | 6.399961445 | 1.92E-18    | 32.61593199 |
| ABHD14A-ACY1   | NR_037192    | 173.8703536 | 28.791643   | 1.35E-09    | 6.03891739  |
| SMARCC1        | NM_003074    | 95.63522867 | 5.62838011  | 9.09E-08    | 16.99160803 |
| APIAR          | NM_018569    | 212.5516643 | 3.064606027 | 6.05E-22    | 69.35692955 |
| MSN            | NM_002444    | 113.26595   | 4.539385417 | 5.91E-10    | 24.95182489 |
| EMP3           | NM_001425    | 91.50332862 | 17.80580726 | 0.000101746 | 5.138959852 |
| DSC2           | NM_004949    | 47.81761433 | 3.512147472 | 0.000209156 | 13.61492213 |
| LURAPIL        | NM_203403    | 51.94951438 | 3.052700493 | 0.000113105 | 17.01756019 |
| PLA2G15        | NM_012320    | 115.3319    | 12.11275186 | 5.67E-08    | 9.521527513 |
| SBDS           | NM_016038    | 193.8879679 | 8.029169567 | 8.38E-18    | 24.14794785 |
| CPEB4          | NM_030627    | 181.1011787 | 4.2211682   | 8.42E-17    | 42.90309462 |
| NAGK           | NM_017567    | 285.2308251 | 20.80716611 | 1.11E-21    | 13.70829759 |
| STK38L         | NM_015000    | 194.7604715 | 3.526171571 | 2.29E-18    | 55.23284037 |
| PTPRE          | NM_130435    | 113.4264215 | 8.799759972 | 4.12E-09    | 12.88971766 |
| MRPS5          | NM_031902    | 227.4044036 | 5.997761837 | 1.58E-21    | 37.91487721 |
| NUP160         | NM_015231    | 161.9560679 | 6.632776774 | 9.54E-14    | 24.41753634 |
| ZFR            | NM_016107    | 147.9758322 | 5.665777474 | 3.21E-13    | 26.1174804  |
| AOC3           | NM_003734    | 77.52309288 | 12.64292475 | 0.000234796 | 6.131737269 |
| C9orf78        | NM_016520    | 208.7407072 | 12.67198582 | 1.89E-17    | 16.47261213 |
| RTTN           | NM_173630    | 194.7604715 | 2.480140785 | 5.34E-19    | 78.52799027 |
| ANO9           | NM_001012302 | 59.57142857 | 6.005601999 | 8.74E-05    | 9.919310101 |
| CPSF1          | NM_013291    | 129.4726073 | 24.00118392 | 9.17E-07    | 5.394425861 |
| LUZP1          | NM_033631    | 114.298925  | 7.338813869 | 6.14E-09    | 15.57457746 |
| RELT           | NM_152222    | 256.3978501 | 13.5761467  | 3.42E-21    | 18.88590744 |
| C15orf52       | NM_207380    | 124.3077322 | 17.22178898 | 5.68E-08    | 7.218049897 |
| ZRANB2         | NM_005455    | 57.8264215  | 4.345883464 | 0.000113867 | 13.30602212 |
| GRAMD1C        | NM_017577    | 75.61761433 | 3.649486317 | 8.04E-07    | 20.72007065 |
| RTN4IP1        | NM_032730    | 70.77368223 | 5.008464607 | 9.42E-06    | 14.13081409 |
| HSD17B7P2      | NR_003086    | 91.50332862 | 3.545009319 | 2.09E-08    | 25.81187252 |
| LOC101927124   | NR_110045    | 52.82201792 | 3.919849839 | 0.000551481 | 13.47552077 |
| WDR25          | NM_001161476 | 171.0923715 | 6.145161445 | 3.09E-15    | 27.84180254 |
| CCT5           | NM_012073    | 119.3033286 | 14.1032552  | 8.36E-08    | 8.459276029 |
| NUP214         | NM_005085    | 182.8461858 | 6.863980384 | 1.86E-15    | 26.63850645 |
| AHCY           | NM_000687    | 134.3165394 | 19.34152146 | 3.12E-08    | 6.944466063 |
| ARV1           | NM_022786    | 73.71213579 | 5.760546499 | 2.88E-06    | 12.79603173 |
| RNMT           | NM_003799    | 154.0132108 | 5.399860956 | 1.79E-14    | 28.52169936 |
| AK8            | NM_152572    | 63.8638001  | 6.647244499 | 7.65E-05    | 9.60755996  |
| GLUD1          | NM_005271    | 71.64618576 | 3.998813447 | 7.39E-06    | 17.91686127 |
| PITHD1         | NM_020362    | 203.5758322 | 13.07445518 | 3.04E-16    | 15.57050212 |
| NFE2L1         | NM_003204    | 262.2747572 | 34.41427277 | 1.24E-15    | 7.621104154 |
| C6orf165       | NM_001031743 | 107.3890429 | 2.722285693 | 8.97E-11    | 39.4481164  |
| SLAH1          | NM_003031    | 69.58023574 | 8.183170273 | 6.99E-05    | 8.502845892 |

|             |              |             |             |             |             |
|-------------|--------------|-------------|-------------|-------------|-------------|
| RPL26       | NM_000987    | 201.8308251 | 28.7743075  | 1.49E-11    | 7.014272197 |
| NOA1        | NM_032313    | 144.1648751 | 12.80824541 | 3.80E-10    | 11.2556303  |
| SIPA1L3     | NM_015073    | 123.4352287 | 6.801194803 | 1.99E-10    | 18.14905061 |
| GNG12       | NM_018841    | 47.81761433 | 5.797115754 | 0.001413133 | 8.248518119 |
| ZBTB26      | NM_020924    | 136.2220179 | 4.697559681 | 3.23E-13    | 28.99846456 |
| RPS10-NUDT3 | NM_001202470 | 169.186893  | 7.597864491 | 5.74E-14    | 22.26769024 |
| IFT140      | NM_014714    | 69.74070721 | 7.995919813 | 0.000100274 | 8.722036844 |
| CYP2J2      | NM_000775    | 51.62857143 | 2.115411674 | 7.49E-05    | 24.40592158 |
| CLMN        | NM_024734    | 59.57142857 | 6.466832689 | 0.000137388 | 9.211840082 |
| NUP188      | NM_015354    | 182.8461858 | 10.96266952 | 1.21E-14    | 16.67898365 |
| DDX55       | NM_020936    | 227.5648751 | 10.55420832 | 9.48E-20    | 21.56152959 |
| SLC25A4     | NM_001151    | 244.3230929 | 18.52980434 | 8.55E-19    | 13.18541137 |
| IL10RA      | NM_001558    | 157.9846393 | 8.738365238 | 1.70E-13    | 18.07942733 |
| NARFL       | NM_022493    | 146.2308251 | 17.61604188 | 3.83E-09    | 8.30100349  |
| RGPD8       | NM_001164463 | 119.1428571 | 2.313419507 | 4.65E-12    | 51.50075755 |
| RNASET2     | NM_003730    | 201.6703536 | 3.390936069 | 1.45E-21    | 59.47335766 |
| DENND2C     | NM_001256404 | 114.298925  | 3.178108322 | 4.78E-11    | 35.96445226 |
| SPAG7       | NM_004890    | 117.3978501 | 19.57649987 | 1.22E-06    | 5.9968764   |
| BMP7        | NM_001719    | 70.61321075 | 8.772313918 | 5.68E-05    | 8.049553562 |
| LARS2       | NM_015340    | 104.4505893 | 5.997725941 | 7.12E-09    | 17.41503202 |
| TMEM260     | NM_017799    | 187.8505893 | 3.508338253 | 5.81E-18    | 53.54403589 |
| UQCRQ       | NM_014402    | 258.3033286 | 40.40370766 | 8.68E-13    | 6.393060032 |
| HDAC1       | NM_004964    | 183.8791608 | 11.71102126 | 5.27E-14    | 15.70137708 |
| SNAPC3      | NM_001039697 | 106.3560679 | 6.995804227 | 2.36E-08    | 15.20283651 |
| ABTB2       | NM_145804    | 156.0791608 | 8.673918801 | 9.02E-13    | 17.99407677 |
| RNASEH2B    | NM_001142279 | 138.2879679 | 4.027379447 | 1.80E-12    | 34.33696024 |
| SEC22A      | NM_012430    | 121.2088072 | 4.45158055  | 1.49E-10    | 27.22826327 |
| POLRMT      | NM_005035    | 134.3165394 | 13.5247823  | 3.62E-09    | 9.93114243  |
| CMTM6       | NM_017801    | 185.7846393 | 6.896773536 | 2.17E-17    | 26.9379063  |
| BMP1        | NR_033404    | 78.55606789 | 9.035334308 | 1.39E-05    | 8.694317799 |
| NUPL2       | NM_007342    | 130.1846393 | 10.05297795 | 2.35E-10    | 12.94985824 |
| KCTD9       | NM_017634    | 96.34726073 | 2.604219568 | 5.11E-10    | 36.99659656 |
| B4GALT1     | NM_001497    | 145.0373786 | 8.33778381  | 4.80E-12    | 17.3951954  |
| ZKSCAN2     | NM_001012981 | 70.61321075 | 7.624267226 | 3.38E-05    | 9.261639008 |
| AEN         | NM_022767    | 93.56927864 | 19.30408626 | 0.000127897 | 4.847122903 |
| THRAP3      | NM_005119    | 193.7274965 | 8.671839394 | 1.32E-16    | 22.33983906 |
| FARSA       | NM_004461    | 205.6417822 | 13.08628526 | 2.87E-16    | 15.71429769 |
| INPP5E      | NM_019892    | 95.47475719 | 14.76603148 | 1.29E-05    | 6.465837303 |
| ZNF672      | NM_024836    | 263.1472607 | 19.78157783 | 2.66E-19    | 13.30264264 |
| CSTF2T      | NM_015235    | 201.6703536 | 7.110522499 | 5.21E-20    | 28.36224112 |
| PTRH1       | NM_001002913 | 96.5077322  | 17.95658274 | 0.000135168 | 5.374504358 |
| MICALL2     | NM_182924    | 288.1692786 | 13.98354916 | 4.60E-24    | 20.60773523 |
| RNF115      | NM_014455    | 136.2220179 | 3.495792977 | 1.80E-13    | 38.96741564 |
| RNASEL      | NM_021133    | 188.7230929 | 5.224277293 | 4.75E-19    | 36.12424883 |
| CCDC101     | NM_138414    | 279.032975  | 8.047488571 | 2.53E-25    | 34.6732987  |
| EFCAB14     | NM_014774    | 99.60665724 | 6.488524154 | 8.86E-08    | 15.35120389 |
| AKAP10      | NM_007202    | 156.0791608 | 4.760761512 | 2.60E-14    | 32.78449474 |
| OSMR        | NM_001168355 | 54.72749646 | 3.824206474 | 5.93E-05    | 14.3108111  |
| TUBA1B      | NM_006082    | 233.4417822 | 57.97234041 | 6.72E-09    | 4.026778642 |
| TRIP13      | NM_004237    | 112.3934465 | 7.7236426   | 4.36E-09    | 14.55187045 |
| PDCL3       | NM_024065    | 161.9560679 | 8.579100587 | 2.67E-14    | 18.87797751 |
| ZNF555      | NM_001172775 | 79.42857143 | 5.747404727 | 6.33E-07    | 13.81990224 |
| DDX20       | NM_007204    | 66.64178218 | 9.222979588 | 0.000327256 | 7.225623948 |
| TMX2-CTNND1 | NR_037646    | 85.6264215  | 10.50183058 | 1.33E-05    | 8.153475803 |
| RPL34-AS1   | NR_026968    | 64.73630363 | 3.983478621 | 5.48E-06    | 16.25119896 |
| TTC23L      | NM_144725    | 202.7033286 | 4.335403473 | 2.08E-19    | 46.75535504 |
| PSMD12      | NM_174871    | 239.6396323 | 7.39908808  | 5.84E-22    | 32.3877253  |
| NCAPD3      | NM_015261    | 232.5692786 | 6.778279968 | 1.53E-20    | 34.3109579  |
| GGN         | NM_152657    | 150.9142857 | 26.53371303 | 6.14E-08    | 5.687642945 |
| SOX13       | NM_005686    | 310.9648751 | 9.876688431 | 1.70E-27    | 31.48473066 |
| ATP5C1      | NM_001001973 | 201.8308251 | 7.497731141 | 2.12E-18    | 26.91892004 |
| TTC32       | NM_001008237 | 128.1186893 | 22.39915115 | 5.47E-07    | 5.719801095 |

|            |              |             |             |             |             |
|------------|--------------|-------------|-------------|-------------|-------------|
| BBS10      | NM_024685    | 242.4176143 | 8.22128731  | 1.11E-23    | 29.48657615 |
| RPL7       | NM_000971    | 273.4770108 | 16.71304273 | 6.20E-22    | 16.36308931 |
| ZNF330     | NM_001292002 | 132.2505893 | 3.878293581 | 8.52E-14    | 34.10020066 |
| COX16      | NM_001204090 | 157.1121358 | 5.850278679 | 8.02E-14    | 26.85549602 |
| ERICH6     | NM_152394    | 101.3516643 | 1.486591198 | 1.45E-10    | 68.17722614 |
| FAM220A    | NM_001037163 | 83.56047148 | 10.78960525 | 1.37E-05    | 7.74453463  |
| NOL9       | NM_024654    | 110.4879679 | 10.6566527  | 4.34E-08    | 10.36798055 |
| RAB11FIP1  | NM_025151    | 295.9516643 | 6.599174959 | 1.55E-28    | 44.84676738 |
| STARD4-AS1 | NR_040093    | 117.2373786 | 2.549708978 | 4.58E-11    | 45.98069019 |
| MED20      | NM_004275    | 202.8638001 | 8.39659886  | 1.25E-18    | 24.16023481 |
| ZNF213-AS1 | NR_110900    | 138.1274965 | 21.80776972 | 8.27E-08    | 6.333866243 |
| CIDECP     | NR_002786    | 97.54070721 | 11.94359356 | 1.10E-06    | 8.166780517 |
| TMEM241    | NM_032933    | 121.3692786 | 5.507245064 | 2.80E-10    | 22.03811111 |
| C10orf111  | NM_153244    | 130.3451108 | 7.896667758 | 1.09E-10    | 16.50634354 |
| XRCC6BP1   | NM_033276    | 268.3121358 | 8.050745782 | 1.47E-25    | 33.3276125  |
| XPO1       | NM_003400    | 191.8220179 | 7.065629132 | 1.16E-16    | 27.14861116 |
| CCDC159    | NM_001080503 | 76.65058935 | 13.10757884 | 0.000289425 | 5.847806852 |
| CAPN7      | NM_014296    | 222.5604715 | 4.1243582   | 3.85E-22    | 53.96244959 |
| YARS2      | NM_001040436 | 158.1451108 | 15.4288074  | 3.55E-11    | 10.2499893  |
| ZBED5-AS1  | NR_034137    | 160.0505893 | 5.507042236 | 6.85E-15    | 29.06289483 |
| ALG6       | NM_013339    | 214.7780858 | 4.637113835 | 2.63E-20    | 46.3171907  |
| C9orf89    | NM_032310    | 76.65058935 | 8.177304172 | 8.50E-06    | 9.373576883 |
| STT3B      | NM_178862    | 188.7230929 | 4.403095165 | 2.57E-17    | 42.86146127 |
| TTC33      | NM_012382    | 49.88356436 | 4.180064163 | 0.001155453 | 11.93368389 |
| HIF1A-AS1  | NR_047116    | 227.5648751 | 7.923547976 | 5.34E-21    | 28.72007284 |
| RCCD1      | NM_033544    | 174.9033286 | 22.1610307  | 8.31E-11    | 7.892382399 |
| MPP5       | NM_001256550 | 111.3604715 | 4.019720823 | 1.27E-09    | 27.70353375 |
| CXCR4      | NM_003467    | 131.2176143 | 7.741056822 | 4.88E-11    | 16.95086567 |
| IMPACT     | NM_018439    | 178.8747572 | 2.999405109 | 4.85E-19    | 59.63674485 |
| CNOT11     | NM_017546    | 132.2505893 | 11.29510745 | 1.27E-09    | 11.70866147 |
| ARHGEF35   | NM_001003702 | 123.4352287 | 18.31772913 | 3.99E-07    | 6.738566106 |
| LENG8      | NM_052925    | 212.7121358 | 25.00327542 | 4.54E-13    | 8.507370823 |
| SDHB       | NM_003000    | 102.3846393 | 8.295096559 | 4.77E-08    | 12.34279054 |
| OLA1       | NM_001011708 | 206.6747572 | 3.768761173 | 5.85E-20    | 54.83891064 |
| EML5       | NM_183387    | 46.78463932 | 2.533824825 | 0.000530079 | 18.46403858 |
| PSMD1      | NR_034059    | 162.9890429 | 5.884075245 | 1.60E-14    | 27.70002696 |
| SRP54      | NM_003136    | 161.9560679 | 5.008728448 | 2.99E-15    | 32.33476711 |
| MEGF8      | NM_001271938 | 106.5165394 | 9.43372343  | 1.81E-07    | 11.29103902 |
| EPHA4      | NM_004438    | 40.9077322  | 3.399354747 | 0.001862285 | 12.03396975 |
| DR1        | NM_001938    | 221.5274965 | 1.974411455 | 4.56E-28    | 112.1992561 |
| LOC145783  | NR_015419    | 76.65058935 | 10.58719001 | 5.58E-05    | 7.239937061 |
| SPATA4     | NM_144644    | 30.0264215  | 1.13688193  | 0.003355247 | 26.41120482 |
| ZSWIM1     | NM_080603    | 164.0220179 | 7.623762377 | 4.92E-15    | 21.51457637 |
| AP5M1      | NR_026895    | 44.87916077 | 3.178941206 | 0.000296979 | 14.11764417 |
| LANCL2     | NM_018697    | 113.4264215 | 6.922642078 | 5.28E-09    | 16.38484559 |
| MTG1       | NM_138384    | 100.3186893 | 6.273877485 | 5.26E-08    | 15.9899025  |
| USP32      | NM_032582    | 100.4791608 | 6.093516693 | 2.69E-08    | 16.48951925 |
| OAZ1       | NM_004152    | 342.7363036 | 28.07987209 | 1.51E-24    | 12.20576442 |
| PDS5B      | NM_015032    | 45.75166431 | 2.122317553 | 0.000523925 | 21.55740749 |
| CDH1       | NM_004360    | 221.5274965 | 8.055120253 | 2.64E-19    | 27.50145119 |
| ZNF519     | NR_033354    | 130.1846393 | 5.306442985 | 9.47E-12    | 24.53331539 |
| DNAJC28    | NM_001040192 | 152.9802357 | 15.49426852 | 1.25E-10    | 9.873343524 |
| DGAT2      | NM_001253891 | 58.85939651 | 10.39813081 | 0.001541717 | 5.660574734 |
| ELOVL3     | NM_152310    | 121.5297501 | 24.76320214 | 6.20E-06    | 4.907675082 |
| RRN3P2     | NR_003369    | 115.1714286 | 5.336967547 | 3.79E-10    | 21.57993796 |
| LRR1Q3     | NM_001105659 | 80.62201792 | 0.449701724 | 3.31E-09    | 179.2788724 |
| YIPF3      | NM_015388    | 154.1736822 | 12.01288846 | 1.27E-11    | 12.83402262 |
| DNPH1      | NM_006443    | 99.44618576 | 16.88296493 | 2.67E-05    | 5.890327093 |
| VPS26B     | NM_052875    | 126.2132108 | 8.618788385 | 9.43E-10    | 14.64396213 |
| MAN1A1     | NM_005907    | 194.7604715 | 3.753522525 | 8.10E-19    | 51.88738583 |
| TMEM223    | NM_001080501 | 270.2176143 | 54.9673482  | 5.41E-11    | 4.91596599  |
| POLG2      | NM_007215    | 157.2726073 | 10.92788965 | 3.84E-12    | 14.39185536 |

|             |              |             |             |             |             |
|-------------|--------------|-------------|-------------|-------------|-------------|
| CACUL1      | NM_153810    | 57.8264215  | 8.427311084 | 0.00092545  | 6.861787933 |
| LMNTD2      | NM_173573    | 130.1846393 | 13.80096471 | 3.07E-09    | 9.433010085 |
| GGCX        | NM_000821    | 94.44178218 | 21.73932229 | 0.000168381 | 4.344283641 |
| UTP11L      | NM_016037    | 191.6615464 | 10.1374955  | 1.27E-16    | 18.90620286 |
| SDHAF1      | NM_001042631 | 193.8879679 | 26.99818681 | 4.29E-09    | 7.181518127 |
| TCTE3       | NM_174910    | 189.7560679 | 5.025168615 | 4.59E-19    | 37.76113449 |
| CLHC1       | NM_152385    | 110.3274965 | 3.568136813 | 7.12E-11    | 30.92019792 |
| TRNT1       | NM_182916    | 177.8417822 | 7.443880617 | 2.37E-15    | 23.89100408 |
| PLLP        | NM_015993    | 84.43297501 | 10.29208697 | 9.14E-06    | 8.203678734 |
| SCYL1       | NM_001048218 | 111.3604715 | 18.4263319  | 1.90E-06    | 6.043550722 |
| ARID2       | NM_152641    | 45.03963225 | 2.741314523 | 0.000534339 | 16.42993968 |
| RRP8        | NM_015324    | 195.7934465 | 6.264255006 | 6.39E-20    | 31.25566349 |
| LINC00888   | NR_038302    | 119.3033286 | 6.179501058 | 1.23E-10    | 19.30630443 |
| CDK12       | NM_016507    | 187.8505893 | 6.162443747 | 2.43E-17    | 30.48313251 |
| SYS1-DBNDD2 | NR_003189    | 128.4396323 | 9.740892133 | 1.30E-09    | 13.18561283 |
| UBR2        | NM_001184801 | 207.7077322 | 3.218608798 | 1.24E-20    | 64.53338856 |
| SMIM13      | NM_001135575 | 114.298925  | 5.935632156 | 4.66E-10    | 19.25640303 |
| ZNF443      | NM_005815    | 67.83522867 | 6.056560573 | 3.04E-05    | 11.20028898 |
| DGCR6       | NM_005675    | 146.2308251 | 27.82158113 | 2.53E-07    | 5.256021373 |
| MTHFD1      | NM_005956    | 48.85058935 | 7.360662025 | 0.004678956 | 6.636711369 |
| SHB         | NM_003028    | 184.7516643 | 10.47200189 | 1.34E-14    | 17.64243993 |
| FBXL8       | NM_018378    | 128.2791608 | 24.88325019 | 3.25E-06    | 5.155241369 |
| THOP1       | NM_003249    | 129.3121358 | 8.211927429 | 9.91E-11    | 15.74686782 |
| KHDRBS3     | NM_006558    | 43.68571429 | 3.925243697 | 0.001025933 | 11.12942728 |
| ACTR8       | NM_022899    | 193.8879679 | 8.278736732 | 9.04E-18    | 23.41999441 |
| ACTR5       | NM_024855    | 153.1407072 | 10.23607668 | 1.77E-12    | 14.96087925 |
| RECQL       | NM_032941    | 73.00010373 | 4.640059656 | 3.41E-06    | 15.7325787  |
| NDUFV2      | NM_021074    | 188.8835644 | 4.980741999 | 1.22E-18    | 37.92277624 |
| NUAK2       | NM_030952    | 253.298925  | 9.664374545 | 1.16E-22    | 26.20955178 |
| TSR2        | NM_058163    | 78.55606789 | 8.587408282 | 2.64E-05    | 9.14782031  |
| KIAA1804    | NM_032435    | 215.4901179 | 3.904104656 | 6.97E-21    | 55.19578415 |
| TLL2        | NM_012465    | 105.4835644 | 8.08664487  | 4.84E-08    | 13.04416925 |
| PRKAA1      | NM_006251    | 75.45714286 | 3.665035867 | 3.24E-06    | 20.58837774 |
| CAT         | NM_001752    | 164.0220179 | 4.609162223 | 8.89E-16    | 35.5860805  |
| PFDN1       | NM_002622    | 115.3319    | 6.850704954 | 4.70E-09    | 16.83504119 |
| MIA3        | NM_198551    | 91.34285714 | 7.596713508 | 6.95E-07    | 12.02399657 |
| DDX27       | NM_017895    | 64.73630363 | 12.18141732 | 0.00146599  | 5.314349057 |
| LIN7C       | NM_018362    | 177.8417822 | 7.328407603 | 1.77E-16    | 24.26745233 |
| ARL6IP5     | NM_006407    | 67.51428571 | 6.757740041 | 5.79E-05    | 9.990660384 |
| LRRRC56     | NM_198075    | 79.74951438 | 7.951229873 | 4.39E-06    | 10.02983383 |
| CUEDC2      | NM_024040    | 156.0791608 | 26.92785119 | 1.98E-08    | 5.796198132 |
| NARS        | NM_004539    | 110.4879679 | 9.023927747 | 2.36E-08    | 12.24388881 |
| SOCS1       | NM_003745    | 155.9186893 | 24.61384562 | 9.48E-08    | 6.334592803 |
| KCTD16      | NM_020768    | 71.64618576 | 0.919811585 | 1.08E-07    | 77.89224112 |
| NKIRAS1     | NM_020345    | 152.1077322 | 5.958429758 | 1.46E-13    | 25.52815731 |
| ZNF286B     | NM_001145045 | 82.68796794 | 4.584622819 | 3.13E-07    | 18.03593691 |
| KPNA4       | NM_002268    | 48.85058935 | 4.67824442  | 0.001298083 | 10.44207719 |
| KBTBD8      | NM_032505    | 137.0945215 | 3.520967504 | 6.98E-15    | 38.93660515 |
| 7-Sep       | NM_001011553 | 66.64178218 | 3.331284066 | 5.61E-06    | 20.00483323 |
| OTUD7B      | NM_020205    | 196.66595   | 7.274273529 | 4.32E-17    | 27.03582004 |
| CLUHP3      | NR_024034    | 92.53630363 | 14.88572728 | 4.17E-05    | 6.216444915 |
| CCDC130     | NM_030818    | 213.7451108 | 11.91168783 | 1.51E-17    | 17.94414979 |
| GSTP1       | NM_000852    | 206.6747572 | 33.51650883 | 7.84E-11    | 6.166356951 |
| MRPS26      | NM_030811    | 229.4703536 | 34.53092535 | 1.28E-11    | 6.645357786 |
| ARX         | NM_139058    | 50.75606789 | 5.580866094 | 0.000393179 | 9.094657897 |
| PIGK        | NM_005482    | 134.3165394 | 2.225906545 | 4.01E-13    | 60.34239832 |
| CINP        | NM_032630    | 183.8791608 | 8.888151645 | 1.51E-15    | 20.68812146 |
| YAE1D1      | NM_020192    | 167.9934465 | 8.495525008 | 5.88E-15    | 19.77434547 |
| LOC729658   | NR_122120    | 32.80440358 | 0.222684494 | 4.81E-05    | 147.3133713 |
| CDS1        | NM_001263    | 81.65499293 | 3.095146196 | 7.65E-08    | 26.38162715 |
| THOC6       | NM_001142350 | 194.7604715 | 24.25394902 | 7.78E-12    | 8.030051984 |
| NOP58       | NM_015934    | 216.6835644 | 8.855938649 | 1.41E-18    | 24.46759999 |

|              |              |             |             |             |             |
|--------------|--------------|-------------|-------------|-------------|-------------|
| GTSE1        | NM_016426    | 83.72094295 | 10.00425137 | 1.76E-05    | 8.368536524 |
| ZNF800       | NM_176814    | 151.2352287 | 3.688206794 | 1.92E-15    | 41.0050838  |
| DIAPH1       | NM_005219    | 114.4593965 | 6.931286171 | 6.57E-09    | 16.51344263 |
| TMEM19       | NM_018279    | 217.7165394 | 3.810816958 | 3.06E-23    | 57.13119832 |
| SOWAHC       | NM_023016    | 62.67035361 | 3.475434794 | 1.11E-05    | 18.03237791 |
| LOC101928068 | NR_111907    | 162.9890429 | 23.46436351 | 1.42E-09    | 6.94623755  |
| TXNL1        | NR_024546    | 122.2417822 | 4.980092887 | 3.36E-11    | 24.54608477 |
| SDSL         | NM_138432    | 111.520943  | 8.685395324 | 1.44E-08    | 12.84005377 |
| EIF2AK3      | NM_004836    | 96.5077322  | 4.05855792  | 2.73E-08    | 23.77882344 |
| PDXDC2P      | NR_003610    | 157.1121358 | 6.279212967 | 4.86E-14    | 25.02099174 |
| BET1         | NM_005868    | 115.3319    | 3.914094461 | 1.01E-11    | 29.46579374 |
| FLJ30679     | NR_026674    | 202.8638001 | 30.65015715 | 1.73E-10    | 6.618687111 |
| LRRRC8A      | NM_019594    | 80.62201792 | 10.1859647  | 3.22E-05    | 7.915010539 |
| PMVK         | NM_006556    | 67.83522867 | 15.56861082 | 0.00196063  | 4.357179292 |
| SLC16A14     | NM_152527    | 90.63082508 | 8.180287366 | 5.83E-07    | 11.07917375 |
| NEK9         | NM_033116    | 178.0022537 | 7.327601061 | 1.99E-15    | 24.29202302 |
| MRPS14       | NR_037606    | 110.4879679 | 9.595387047 | 3.80E-08    | 11.51469632 |
| EIF2AK4      | NM_001013703 | 189.9165394 | 5.150634596 | 3.14E-17    | 36.87245442 |
| SLX4IP       | NM_001009608 | 89.4373786  | 4.799105732 | 3.03E-07    | 18.63625925 |
| SVOP         | NM_018711    | 41.78023574 | 4.197871725 | 0.001018023 | 9.952718538 |
| EVPL         | NM_001988    | 218.9099859 | 13.27072487 | 1.81E-17    | 16.49570675 |
| FANCL        | NM_018062    | 188.7230929 | 3.466958328 | 6.08E-19    | 54.43477395 |
| ERII         | NM_153332    | 107.5495144 | 4.261237141 | 6.71E-10    | 25.23903524 |
| LOC101928438 | NR_109802    | 199.7648751 | 4.17364163  | 5.20E-18    | 47.86344702 |
| FLJ10038     | NR_026891    | 84.59344649 | 15.77150553 | 0.000121866 | 5.363688731 |
| ATM          | NM_000051    | 98.57368223 | 3.724368891 | 2.36E-09    | 26.4672177  |
| ZCRB1        | NM_033114    | 151.0747572 | 5.244217699 | 1.06E-14    | 28.80787295 |
| SIX4         | NM_017420    | 80.46154644 | 12.38062714 | 7.83E-05    | 6.498987939 |
| ATF1         | NM_005171    | 55.76047148 | 4.85799293  | 0.000208368 | 11.47808823 |
| M6PR         | NM_001207024 | 152.9802357 | 14.02074167 | 5.31E-11    | 10.91099454 |
| DIP2B        | NM_173602    | 150.0417822 | 4.961415394 | 3.13E-13    | 30.24172948 |
| UBN2         | NM_173569    | 45.75166431 | 2.766134119 | 0.000469618 | 16.53992986 |
| SLC38A2      | NM_018976    | 243.4505893 | 19.61081201 | 1.77E-17    | 12.4141004  |
| PFDN4        | NM_002623    | 95.47475719 | 6.103802015 | 5.54E-08    | 15.64185027 |
| COX5A        | NM_004255    | 215.6505893 | 5.72204586  | 1.36E-21    | 37.68767232 |
| LOC286190    | NR_038881    | 98.57368223 | 6.07598846  | 1.57E-08    | 16.22348082 |
| FAHD2A       | NM_016044    | 211.6791608 | 14.97069088 | 4.75E-16    | 14.13957194 |
| AARS2        | NM_020745    | 211.8396323 | 12.69283205 | 3.29E-17    | 16.68970576 |
| B3GALNT2     | NM_001277155 | 203.7363036 | 5.785400049 | 1.47E-18    | 35.21559476 |
| HUS1         | NM_004507    | 224.46595   | 9.235884797 | 4.97E-20    | 24.30367582 |
| CBL          | NM_005188    | 125.1802357 | 5.326310373 | 6.30E-11    | 23.50224207 |
| NR2F1        | NM_005654    | 42.81321075 | 4.858548734 | 0.002456259 | 8.811933995 |
| CBX3P2       | NR_033754    | 177.8417822 | 7.776234239 | 3.29E-16    | 22.86991064 |
| RSBN1L       | NM_198467    | 179.9077322 | 4.759391612 | 1.46E-16    | 37.80057345 |
| NAPRT        | NM_001286829 | 149.1692786 | 31.40284338 | 1.09E-06    | 4.750183824 |
| GINM1        | NM_138785    | 182.8461858 | 6.700610682 | 6.61E-17    | 27.28798828 |
| ASF1A        | NM_014034    | 109.2945215 | 6.172700466 | 2.40E-09    | 17.7061113  |
| SETX         | NM_015046    | 198.8923715 | 7.011478438 | 3.35E-17    | 28.3666809  |
| CYP51A1-AS1  | NR_122109    | 142.098925  | 5.324092453 | 4.46E-13    | 26.68979292 |
| LYPD6B       | NM_177964    | 37.80880717 | 3.432943402 | 0.003480595 | 11.01352476 |
| HACE1        | NR_104424    | 150.0417822 | 3.634044423 | 1.24E-14    | 41.2878228  |
| CEP290       | NM_025114    | 66.80225365 | 2.078946674 | 4.41E-06    | 32.13274034 |
| TMOD2        | NM_014548    | 55.6        | 5.961792463 | 0.00040689  | 9.32605426  |
| ANKRD13C     | NM_030816    | 185.7846393 | 3.611366807 | 1.99E-18    | 51.44441128 |
| PSMD5        | NM_001270427 | 173.1583215 | 7.963056774 | 1.08E-14    | 21.74520746 |
| LINC01136    | NR_034151    | 178.8747572 | 11.75243522 | 8.48E-15    | 15.22022915 |
| ARL4D        | NM_001661    | 199.7648751 | 19.57200372 | 5.51E-13    | 10.20666448 |
| SLC39A14     | NM_001135153 | 47.97808581 | 8.937440534 | 0.004651396 | 5.368213151 |
| TRADD        | NM_003789    | 86.49892504 | 11.29537923 | 2.50E-05    | 7.657903576 |
| LINC01126    | NR_027251    | 113.4264215 | 8.028327834 | 3.86E-08    | 14.12827476 |
| PEAK1        | NM_024776    | 184.7516643 | 2.4951634   | 7.27E-18    | 74.04391404 |
| NUDCD2       | NM_145266    | 214.7780858 | 11.44640326 | 3.22E-18    | 18.76380561 |

|              |              |             |             |             |             |
|--------------|--------------|-------------|-------------|-------------|-------------|
| SAV1         | NM_021818    | 150.2022537 | 2.258720964 | 1.09E-16    | 66.49880885 |
| GABPB1       | NM_002041    | 158.1451108 | 6.246678265 | 3.57E-14    | 25.31667297 |
| C5orf28      | NM_022483    | 154.1736822 | 3.321299353 | 5.21E-15    | 46.41968876 |
| NCBP1        | NM_002486    | 106.3560679 | 7.911241045 | 2.69E-08    | 13.44366419 |
| RELB         | NM_006509    | 63.54285714 | 9.102928211 | 0.000270991 | 6.980485363 |
| LOC100288974 | NR_033857    | 105.4835644 | 5.661189854 | 1.78E-09    | 18.63275514 |
| DNAJC17      | NM_018163    | 98.41321075 | 6.124940526 | 2.38E-08    | 16.067619   |
| ANKRD50      | NM_001167882 | 231.5363036 | 3.390104877 | 1.76E-23    | 68.29768165 |
| LOC100130987 | NR_024469    | 86.49892504 | 12.26446122 | 1.29E-05    | 7.052810837 |
| MTHFD2       | NR_027405    | 293.0132108 | 14.59018914 | 1.21E-24    | 20.08289323 |
| GADD45B      | NM_015675    | 260.3692786 | 40.29152675 | 3.44E-13    | 6.462134836 |
| ARPC5L       | NM_030978    | 189.7560679 | 22.12048082 | 3.43E-12    | 8.578297617 |
| INADL        | NM_176877    | 112.232975  | 3.685905586 | 2.43E-10    | 30.44922676 |
| FUCA2        | NM_032020    | 85.78689298 | 10.79590831 | 6.79E-06    | 7.946241347 |
| MANBAL       | NM_001003897 | 201.8308251 | 10.72296308 | 2.05E-16    | 18.82229973 |
| COX20        | NM_198076    | 179.7472607 | 21.4298834  | 9.00E-12    | 8.38769196  |
| CCDC18       | NM_206886    | 221.6879679 | 4.582565264 | 7.90E-21    | 48.37639077 |
| LINC00467    | NR_026761    | 244.3230929 | 4.485814051 | 2.08E-24    | 54.46572018 |
| RRAGA        | NM_006570    | 190.7890429 | 44.51506678 | 3.87E-07    | 4.285943091 |
| SUPT6H       | NM_003170    | 128.4396323 | 11.92295265 | 6.50E-09    | 10.77246853 |
| RNF43        | NM_017763    | 73.87260726 | 11.38111393 | 0.000116866 | 6.49080641  |
| DCAF15       | NM_138353    | 130.3451108 | 11.69221987 | 1.48E-09    | 11.14802085 |
| DNAJC27-AS1  | NR_034113    | 184.7516643 | 7.192320673 | 5.51E-16    | 25.68735082 |
| SLC35A4      | NM_080670    | 134.1560679 | 14.7472187  | 8.44E-09    | 9.097041997 |
| RFC1         | NM_001204747 | 109.4549929 | 5.760971734 | 2.74E-09    | 18.99939767 |
| GUF1         | NM_021927    | 172.9978501 | 5.805319296 | 2.48E-16    | 29.79988546 |
| RPS11        | NM_001015    | 177.8417822 | 43.89643549 | 6.17E-07    | 4.051394611 |
| KIAA1161     | NM_020702    | 217.7165394 | 14.00577574 | 1.37E-17    | 15.54476834 |
| JAG1         | NM_000214    | 290.9472607 | 10.31082214 | 4.02E-25    | 28.21765876 |
| NMD3         | NM_015938    | 165.9274965 | 5.380636544 | 5.46E-15    | 30.83789345 |
| RPL24        | NM_000986    | 217.5560679 | 18.44829617 | 1.21E-15    | 11.79274584 |
| HEYL         | NM_014571    | 196.8264215 | 14.27420247 | 2.34E-15    | 13.78896102 |
| FBXL3        | NM_012158    | 133.1230929 | 5.189579272 | 5.47E-12    | 25.65200104 |
| COX10        | NM_001303    | 189.7560679 | 4.610467706 | 4.22E-17    | 41.15766122 |
| DCUN1D2      | NM_001014283 | 67.67475719 | 7.743867425 | 7.86E-05    | 8.739142017 |
| NPC1         | NM_000271    | 159.3385573 | 9.505418892 | 1.51E-12    | 16.76291798 |
| ARHGEF37     | NM_001001669 | 47.81761433 | 5.322350903 | 0.001267201 | 8.984303215 |
| C10orf76     | NM_024541    | 239.8001037 | 8.175610704 | 1.48E-20    | 29.33115487 |
| UBASH3B      | NM_032873    | 189.9165394 | 8.159358011 | 8.38E-16    | 23.27591694 |
| XYLB         | NM_005108    | 109.4549929 | 6.345335055 | 2.66E-09    | 17.24967901 |
| PPIL1        | NM_016059    | 214.6176143 | 11.61842037 | 6.30E-18    | 18.47218534 |
| BCL7A        | NM_020993    | 80.46154644 | 9.268445257 | 7.98E-06    | 8.681234469 |
| CDC37L1      | NM_017913    | 297.1451108 | 4.360449802 | 1.97E-31    | 68.14551807 |
| GPATCH11     | NM_174931    | 83.56047148 | 5.880693742 | 1.32E-06    | 14.20928808 |
| LRWD1        | NM_152892    | 206.6747572 | 37.17509205 | 4.25E-10    | 5.559495506 |
| CTC-338M12.4 | NR_109909    | 190.7890429 | 24.38648873 | 5.48E-12    | 7.823555289 |
| NPDC1        | NM_015392    | 140.1934465 | 8.397223069 | 3.71E-12    | 16.69521523 |
| RBBP9        | NM_006606    | 124.4682037 | 7.061728454 | 9.46E-11    | 17.62574198 |
| CTBS         | NM_004388    | 291.9802357 | 7.250061238 | 1.63E-28    | 40.27279579 |
| ANP32B       | NM_006401    | 79.5890429  | 9.680789047 | 3.05E-05    | 8.221338417 |
| HSPA12A      | NM_025015    | 81.49452145 | 13.66512352 | 7.82E-05    | 5.963687142 |
| SMYD5        | NM_006062    | 128.2791608 | 12.62575287 | 7.78E-09    | 10.16011972 |
| PCOLCE2      | NM_013363    | 80.46154644 | 4.885434235 | 1.50E-06    | 16.46968162 |
| APPBP2       | NM_006380    | 267.4396323 | 6.85914781  | 3.93E-24    | 38.99021273 |
| PRKAB1       | NM_006253    | 163.1495144 | 13.58983623 | 3.92E-12    | 12.00525979 |
| SLC7A5       | NM_003486    | 311.8373786 | 16.52986807 | 1.89E-24    | 18.86508575 |
| CRACR2A      | NM_032680    | 117.3978501 | 4.282014471 | 3.88E-10    | 27.41650008 |
| RNF139       | NM_007218    | 189.9165394 | 11.66900668 | 5.21E-15    | 16.27529613 |
| THUMPD1      | NM_017736    | 84.59344649 | 14.81875889 | 5.56E-05    | 5.708537881 |
| COQ5         | NM_032314    | 167.9934465 | 7.458735296 | 4.23E-15    | 22.52304711 |
| MGME1        | NM_052865    | 73.71213579 | 6.026545148 | 3.04E-06    | 12.23124261 |
| C17orf59     | NM_017622    | 106.6770108 | 22.90815957 | 0.000117668 | 4.656725501 |



|              |              |             |             |             |             |
|--------------|--------------|-------------|-------------|-------------|-------------|
| LOC100288846 | NR_038935    | 88.56487506 | 6.204071448 | 1.91E-06    | 14.2752829  |
| TIMM17A      | NM_006335    | 141.386893  | 7.863156155 | 9.86E-12    | 17.98093414 |
| SEC61A1      | NM_013336    | 185.7846393 | 19.0701932  | 2.27E-12    | 9.742147727 |
| TLX3         | NM_021025    | 59.73190005 | 7.054621109 | 0.000504514 | 8.467059977 |
| PABPC1L      | NM_001124756 | 212.5516643 | 12.65038577 | 4.94E-17    | 16.80199072 |
| ATP1A3       | NM_001256214 | 186.8176143 | 7.761979268 | 6.88E-16    | 24.06829597 |
| GNB2L1       | NM_006098    | 206.8352287 | 28.60959537 | 4.79E-12    | 7.229575462 |
| REEP6        | NM_138393    | 153.1407072 | 12.3334621  | 1.08E-11    | 12.41668446 |
| MEMO1        | NM_015955    | 57.66595002 | 2.907792178 | 4.10E-05    | 19.83152388 |
| EFNB1        | NM_004429    | 146.0703536 | 9.482133943 | 1.55E-11    | 15.40479754 |
| CCS          | NM_005125    | 314.9363036 | 14.36896106 | 7.10E-27    | 21.91782011 |
| TNKS2        | NM_025235    | 69.74070721 | 3.917722295 | 2.60E-06    | 17.80134016 |
| MICU2        | NM_152726    | 278.1604715 | 3.207121131 | 3.84E-28    | 86.73213766 |
| LOC100507250 | NR_038930    | 109.2945215 | 9.743216831 | 2.30E-08    | 11.21749863 |
| RAD51AP1     | NM_006479    | 65.60880717 | 6.01119905  | 2.20E-05    | 10.91442932 |
| BAG2         | NM_004282    | 218.5890429 | 10.64473523 | 8.95E-19    | 20.5349441  |
| SGPL1        | NM_003901    | 108.2615464 | 7.617319749 | 1.91E-08    | 14.21255113 |
| MGMT         | NM_002412    | 49.72309288 | 1.017218226 | 2.98E-05    | 48.88144118 |
| KRTCAP2      | NM_173852    | 149.0088072 | 18.87019583 | 5.24E-09    | 7.896516204 |
| INO80E       | NM_173618    | 156.9516643 | 15.64399748 | 3.83E-11    | 10.03270836 |
| SLC25A30-AS1 | NR_047031    | 195.7934465 | 22.5591665  | 3.63E-12    | 8.67910818  |
| LOC100133091 | NR_029411    | 167.832975  | 8.08115772  | 3.75E-14    | 20.76843205 |
| NARS2        | NM_001243251 | 159.0176143 | 3.478098245 | 1.68E-15    | 45.71970172 |
| PIGS         | NM_033198    | 159.8901179 | 11.81998307 | 2.15E-12    | 13.5271021  |
| ANKRD36B     | NM_025190    | 117.2373786 | 2.992403762 | 2.22E-11    | 39.17832884 |
| SRP14        | NM_003134    | 183.8791608 | 12.87586817 | 1.35E-14    | 14.28091359 |
| ISY1         | NM_001199469 | 47.81761433 | 6.25868161  | 0.001193563 | 7.640205608 |
| PSMF1        | NM_006814    | 166.9604715 | 8.017035728 | 3.88E-14    | 20.82571129 |
| WWTR1-AS1    | NR_040250    | 195.7934465 | 19.7117164  | 4.62E-13    | 9.932846155 |
| ADCK3        | NM_020247    | 142.098925  | 7.948962413 | 7.14E-12    | 17.87641174 |
| BRAF         | NM_004333    | 110.3274965 | 3.058931056 | 1.73E-10    | 36.06733674 |
| PPP2CA       | NM_002715    | 122.2417822 | 10.81919154 | 3.30E-09    | 11.29860598 |
| TYK2         | NM_003331    | 174.9033286 | 8.262154101 | 1.58E-14    | 21.16921646 |
| ACYP2        | NM_138448    | 85.6264215  | 4.070782108 | 7.10E-08    | 21.03439075 |
| SUMO2        | NM_006937    | 119.4638001 | 19.23770378 | 1.26E-06    | 6.209878346 |
| HCFC2        | NM_013320    | 142.098925  | 3.565489917 | 1.49E-13    | 39.85396912 |
| NUTF2        | NM_005796    | 74.58463932 | 11.44701779 | 9.20E-05    | 6.51563933  |
| TTN-AS1      | NR_038271    | 111.520943  | 4.522903935 | 1.40E-09    | 24.65693381 |
| PDX1         | NM_000209    | 125.1802357 | 9.866192386 | 1.26E-09    | 12.68779594 |
| EXOSC8       | NM_181503    | 134.3165394 | 12.12191885 | 8.43E-10    | 11.08046845 |
| KBTBD6       | NM_152903    | 162.9890429 | 10.2816755  | 1.34E-13    | 15.85238154 |
| TUBE1        | NM_016262    | 171.9648751 | 2.753967766 | 2.11E-19    | 62.44258817 |
| ANKRD19P     | NR_026868    | 40.74726073 | 3.5375303   | 0.001408838 | 11.51856161 |
| TUBA1C       | NM_032704    | 314.9363036 | 26.67554201 | 6.05E-22    | 11.80618199 |
| PRMT9        | NM_138364    | 112.3934465 | 4.896894788 | 7.55E-10    | 22.95198311 |
| PROSER2      | NM_153256    | 127.2461858 | 6.09469187  | 1.83E-11    | 20.87819835 |
| BCRP2        | NR_037566    | 45.91213579 | 4.330180188 | 0.001615275 | 10.60282339 |
| SLFN5        | NM_144975    | 257.2703536 | 9.590973276 | 1.88E-22    | 26.82421754 |
| FCF1         | NM_015962    | 88.40440358 | 5.276638379 | 9.07E-08    | 16.75392499 |
| ZNF862       | NM_001099220 | 144.1648751 | 13.00907313 | 2.48E-10    | 11.08187137 |
| DUSP23       | NM_017823    | 152.1077322 | 9.800195326 | 2.71E-11    | 15.52088781 |
| CYBRD1       | NM_001256909 | 81.49452145 | 5.594214379 | 5.70E-07    | 14.56764363 |
| BOLA1        | NM_016074    | 188.8835644 | 31.3197033  | 2.49E-08    | 6.030822276 |
| CDC42EP2     | NM_006779    | 250.3604715 | 19.99573047 | 2.36E-18    | 12.52069645 |
| PTGER4       | NM_000958    | 162.9890429 | 6.670889525 | 9.65E-15    | 24.43287995 |
| LOC400684    | NR_046201    | 227.4044036 | 11.63309843 | 4.23E-19    | 19.54805119 |
| ISL1         | NM_002202    | 118.2703536 | 6.080042273 | 1.22E-10    | 19.45222554 |
| MTX2         | NM_006554    | 232.4088072 | 3.369302294 | 9.88E-23    | 68.97831862 |
| TNFRSF21     | NM_014452    | 179.9077322 | 5.057754593 | 1.46E-16    | 35.5706725  |
| MTX3         | NM_001010891 | 135.1890429 | 2.826515763 | 1.04E-14    | 47.82886573 |
| PSMC1        | NM_002802    | 141.2264215 | 11.90613227 | 1.68E-10    | 11.861654   |
| FAM188A      | NM_024948    | 124.1472607 | 3.671871272 | 6.80E-12    | 33.81035214 |

|              |              |             |             |             |             |
|--------------|--------------|-------------|-------------|-------------|-------------|
| AP1M1        | NM_001130524 | 73.71213579 | 9.251175872 | 2.60E-05    | 7.967866659 |
| VPS37C       | NM_017966    | 79.5890429  | 10.35917182 | 3.08E-05    | 7.682954229 |
| TWISTNB      | NM_001002926 | 208.7407072 | 4.1203764   | 8.92E-23    | 50.66059189 |
| ST3GAL6-AS1  | NR_046683    | 140.353918  | 6.284999929 | 1.29E-12    | 22.33157033 |
| FAM229B      | NM_001033564 | 97.54070721 | 3.543996307 | 1.90E-09    | 27.5228016  |
| FAM32A       | NM_014077    | 73.87260726 | 10.30045323 | 0.000108039 | 7.17178221  |
| MYT1         | NM_004535    | 41.78023574 | 6.219148918 | 0.00431123  | 6.717998924 |
| LOC100147773 | NR_125374    | 127.4066572 | 10.43492608 | 8.28E-10    | 12.20963678 |
| U2SURP       | NM_001080415 | 89.59785007 | 3.652728958 | 1.95E-08    | 24.52901683 |
| LRRRC73      | NM_001012974 | 88.40440358 | 18.5802823  | 0.000265546 | 4.757968806 |
| FUT2         | NM_001097638 | 131.2176143 | 14.94164123 | 1.35E-08    | 8.782008101 |
| KDSR         | NM_002035    | 125.1802357 | 5.808875604 | 2.54E-11    | 21.54982208 |
| MEA1         | NM_014623    | 167.832975  | 34.65413958 | 7.13E-07    | 4.843085907 |
| CCDC136      | NM_001201372 | 74.58463932 | 7.337729652 | 2.18E-05    | 10.16453901 |
| TONSL        | NM_013432    | 302.8615464 | 23.00125163 | 2.78E-22    | 13.16717678 |
| FLJ37035     | NR_033847    | 140.353918  | 9.165962709 | 1.24E-11    | 15.31251244 |
| VTIIA        | NM_145206    | 430.2682037 | 6.306690931 | 2.21E-40    | 68.22408271 |
| PYCRL        | NM_023078    | 172.8373786 | 30.6238797  | 1.28E-08    | 5.643875965 |
| SBF2-AS1     | NR_036485    | 85.6264215  | 10.29418036 | 1.15E-05    | 8.317944555 |
| MKLN1-AS     | NR_125364    | 107.5495144 | 5.462584195 | 2.76E-09    | 19.68839482 |
| MRPL45P2     | NR_033934    | 94.44178218 | 9.447257954 | 1.79E-06    | 9.996740074 |
| KCTD10       | NM_031954    | 165.9274965 | 12.05191404 | 1.43E-12    | 13.76772984 |
| TGFB1        | NM_000660    | 90.47035361 | 12.13767942 | 1.03E-05    | 7.453677962 |
| DNAJC30      | NM_032317    | 147.1033286 | 7.559385989 | 1.13E-12    | 19.45969274 |
| GRIPAP1      | NM_020137    | 96.34726073 | 6.440948234 | 1.14E-07    | 14.95855225 |
| MAK16        | NM_032509    | 70.9341537  | 9.317013282 | 0.000121483 | 7.613400513 |
| PWP2         | NM_005049    | 105.4835644 | 12.9384341  | 5.74E-07    | 8.15273035  |
| IRF7         | NM_001572    | 231.6967751 | 43.52347811 | 9.57E-11    | 5.323489417 |
| IPPK         | NM_022755    | 81.8154644  | 8.570737446 | 4.80E-06    | 9.545907213 |
| EEA1         | NM_003566    | 121.3692786 | 2.355749841 | 1.67E-11    | 51.52044437 |
| NUDT5        | NM_014142    | 132.2505893 | 11.18949673 | 4.86E-10    | 11.81917226 |
| C1orf213     | NR_033690    | 233.6022537 | 28.76615117 | 8.74E-14    | 8.120733716 |
| MAN1A2       | NM_006699    | 159.0176143 | 2.23390508  | 1.06E-15    | 71.18369343 |
| LPPR2        | NM_001170635 | 125.1802357 | 13.51873857 | 1.09E-08    | 9.259757121 |
| LSM3         | NM_014463    | 56.79344649 | 5.969412949 | 0.000148247 | 9.514075667 |
| USP47        | NM_001282659 | 132.2505893 | 3.986231965 | 1.53E-11    | 33.17684232 |
| MBTPS1       | NM_003791    | 87.69237152 | 11.27658243 | 6.95E-06    | 7.776502508 |
| C9orf156     | NM_016481    | 131.2176143 | 8.739827602 | 1.59E-10    | 15.01375317 |
| KANK2        | NM_001136191 | 156.9516643 | 11.67024593 | 1.14E-11    | 13.44887377 |
| CUL5         | NM_003478    | 63.70332862 | 5.276673637 | 7.03E-05    | 12.07263003 |
| UPK1A-AS1    | NR_046420    | 67.67475719 | 5.067836409 | 6.81E-06    | 13.35377698 |
| C15orf39     | NM_015492    | 289.0417822 | 15.49238618 | 1.11E-23    | 18.65702151 |
| RPL32P3      | NR_003111    | 95.47475719 | 15.92473932 | 1.85E-05    | 5.995373317 |
| CA13         | NM_198584    | 181.9736822 | 4.822711005 | 1.01E-17    | 37.73265328 |
| ZNF18        | NM_144680    | 222.5604715 | 6.182881029 | 3.96E-22    | 35.99624034 |
| CHUK         | NM_001278    | 194.920943  | 8.812149925 | 3.55E-16    | 22.11956726 |
| ESD          | NM_001984    | 146.0703536 | 5.024825742 | 4.68E-14    | 29.06973517 |
| PLIN5        | NM_001013706 | 81.65499293 | 3.392579116 | 5.92E-08    | 24.06870706 |
| BTN2A3P      | NR_027795    | 87.53190005 | 10.27860506 | 6.82E-06    | 8.515931838 |
| PJA1         | NM_001032396 | 81.49452145 | 7.837456538 | 5.06E-06    | 10.39808273 |
| PMM2         | NM_000303    | 152.1077322 | 11.20370292 | 1.09E-11    | 13.57655886 |
| TICRR        | NM_152259    | 171.9648751 | 5.841582766 | 6.82E-16    | 29.4380619  |
| ACTR3C       | NM_001164458 | 48.85058935 | 5.920727379 | 0.001351615 | 8.250774984 |
| ZC3HC1       | NM_016478    | 159.0176143 | 8.298971942 | 7.88E-14    | 19.16112206 |
| FAM103A1     | NM_031452    | 165.9274965 | 7.528149192 | 5.52E-15    | 22.04094157 |
| CYB5R1       | NM_016243    | 79.5890429  | 15.76210396 | 0.000341376 | 5.049392081 |
| WDR77        | NM_024102    | 117.2373786 | 6.105515409 | 3.80E-10    | 19.20188072 |
| MSL3P1       | NR_024322    | 112.3934465 | 7.606326975 | 5.09E-09    | 14.77631015 |
| ZNF830       | NM_052857    | 145.1978501 | 3.999350157 | 3.92E-14    | 36.30536072 |
| SLC48A1      | NM_017842    | 134.1560679 | 12.76384392 | 1.11E-09    | 10.51063212 |
| ASB1         | NM_001040445 | 100.4791608 | 9.177310281 | 3.70E-07    | 10.94865028 |
| NT5DC3       | NM_001031701 | 48.69011787 | 7.204790064 | 0.004653482 | 6.75802035  |

|              |              |             |             |             |             |
|--------------|--------------|-------------|-------------|-------------|-------------|
| SLC6A17      | NM_001010898 | 174.9033286 | 8.715602693 | 6.69E-15    | 20.06784095 |
| CTDSP2       | NM_005730    | 73.55166431 | 14.90071064 | 0.000326473 | 4.936117887 |
| ADPRHL1      | NM_199162    | 145.0373786 | 7.955604047 | 1.52E-12    | 18.23084429 |
| C15orf56     | NM_001039905 | 140.353918  | 19.69377385 | 4.72E-08    | 7.12681678  |
| SMG5         | NM_015327    | 249.3274965 | 12.14693182 | 1.34E-20    | 20.52596492 |
| EIF5S2       | NM_003908    | 212.7121358 | 13.43775037 | 2.21E-16    | 15.8294454  |
| ECH1         | NM_001398    | 74.7451108  | 14.32670629 | 0.000275257 | 5.217187349 |
| FUK          | NM_145059    | 107.3890429 | 16.90558695 | 1.46E-06    | 6.352281246 |
| GALNS        | NM_000512    | 157.9846393 | 18.12332866 | 4.71E-10    | 8.717197724 |
| XAB2         | NM_020196    | 87.53190005 | 15.08463949 | 3.82E-05    | 5.802717401 |
| NDUFA6-AS1   | NR_034118    | 118.2703536 | 10.7771322  | 1.30E-08    | 10.97419531 |
| ERCC6        | NM_000124    | 229.4703536 | 6.370070053 | 3.65E-20    | 36.02320723 |
| IDH3A        | NM_005530    | 139.320943  | 8.38219451  | 2.65E-11    | 16.62105822 |
| TDRD7        | NM_014290    | 64.57583215 | 5.222919271 | 3.70E-05    | 12.36393457 |
| ULBP2        | NM_025217    | 159.0176143 | 15.79090943 | 3.52E-11    | 10.07019989 |
| LAMB2        | NM_002292    | 81.65499293 | 15.00187006 | 0.00013484  | 5.442987616 |
| UBE2D4       | NM_015983    | 223.5934465 | 12.1515268  | 3.39E-18    | 18.40044056 |
| KCTD12       | NM_138444    | 42.81321075 | 2.759718071 | 0.000856931 | 15.51361757 |
| CAPNS1       | NM_001749    | 223.5934465 | 12.97517864 | 2.26E-18    | 17.23239831 |
| AGPAT6       | NM_178819    | 157.1121358 | 10.80002496 | 2.71E-12    | 14.54738636 |
| GOLT1A       | NM_198447    | 65.76927864 | 8.785368129 | 0.000376794 | 7.486229111 |
| BUB1B        | NM_001211    | 125.3407072 | 3.109740401 | 1.64E-12    | 40.30584263 |
| SMU1         | NM_018225    | 154.1736822 | 8.935006014 | 2.71E-12    | 17.25501717 |
| AQR          | NM_014691    | 171.0923715 | 3.810262074 | 1.28E-15    | 44.90304556 |
| DECR2        | NM_020664    | 155.9186893 | 5.257512014 | 4.10E-15    | 29.65636387 |
| SMAD4        | NM_005359    | 129.1516643 | 4.848218774 | 1.58E-11    | 26.63899266 |
| POLR2J       | NM_006234    | 105.4835644 | 6.774064286 | 2.46E-09    | 15.57168044 |
| GNS          | NM_002076    | 87.53190005 | 4.761963336 | 1.62E-07    | 18.38147291 |
| TAX1BP3      | NM_014604    | 256.3978501 | 34.87132503 | 8.15E-15    | 7.352684472 |
| TMTC2        | NM_152588    | 94.44178218 | 2.176282087 | 1.06E-08    | 43.39592866 |
| RBM41        | NM_001171080 | 47.97808581 | 1.897127526 | 0.000194108 | 25.28985804 |
| LMAN2        | NM_006816    | 227.5648751 | 10.2002014  | 1.17E-19    | 22.30984137 |
| CNPPD1       | NM_015680    | 151.0747572 | 13.20160235 | 3.82E-11    | 11.44366822 |
| ACOT8        | NM_005469    | 200.6373786 | 13.47562457 | 8.61E-16    | 14.88891127 |
| FBF1         | NM_001080542 | 319.9407072 | 17.04029548 | 1.25E-25    | 18.77553753 |
| USP24        | NM_015306    | 48.85058935 | 3.811864588 | 0.000289891 | 12.81540522 |
| GRID1        | NM_017551    | 39.87475719 | 3.705358523 | 0.001974547 | 10.76137625 |
| LYRM5        | NM_001001660 | 198.7319    | 12.06752595 | 4.21E-16    | 16.46832174 |
| PRIM1        | NM_000946    | 124.3077322 | 5.220260211 | 4.39E-11    | 23.81255477 |
| MAGOH        | NM_002370    | 52.98248939 | 8.077421326 | 0.000979644 | 6.55933215  |
| RPAP1        | NM_015540    | 166.9604715 | 9.569097213 | 1.32E-13    | 17.44788121 |
| CLIP2        | NM_003388    | 58.69892504 | 7.409814352 | 0.000548213 | 7.921780796 |
| DPY19L2P1    | NR_002833    | 25.89452145 | 0.029745166 | 0.00071964  | 870.5455468 |
| LOC101060553 | NR_120398    | 247.5824894 | 11.20400522 | 1.53E-22    | 22.09767708 |
| STXBP3       | NM_007269    | 226.5319    | 4.440779352 | 9.01E-22    | 51.01174414 |
| CLDN1        | NM_021101    | 46.78463932 | 3.81661504  | 0.001412023 | 12.25814991 |
| TRIM4        | NM_033017    | 133.4440358 | 8.864251383 | 1.95E-10    | 15.05417999 |
| FAHD2B       | NM_199336    | 252.4264215 | 11.5924103  | 1.14E-21    | 21.77514555 |
| MAP1S        | NM_018174    | 82.52749646 | 7.98637989  | 1.97E-06    | 10.33353004 |
| EIF5A2       | NM_020390    | 142.098925  | 0.810845466 | 1.82E-19    | 175.2478505 |
| HSPA13       | NM_006948    | 85.46595002 | 0.957441947 | 3.22E-11    | 89.26488991 |
| CDCA2        | NM_152562    | 183.8791608 | 7.440957753 | 6.36E-16    | 24.71175981 |
| LINC01182    | NR_121681    | 32.80440358 | 0.141570956 | 0.001106095 | 231.7170446 |
| RADIL        | NM_018059    | 45.75166431 | 6.247943877 | 0.002446871 | 7.322675301 |
| TANC1        | NM_033394    | 330.8220179 | 6.922078816 | 3.38E-29    | 47.79229285 |
| SUSD2        | NM_019601    | 40.03522867 | 3.809884782 | 0.003144427 | 10.50825181 |
| SDF2L1       | NM_022044    | 115.3319    | 27.22842216 | 0.000177688 | 4.235717347 |
| MAP1LC3B     | NM_022818    | 127.2461858 | 16.9667892  | 4.59E-08    | 7.499721028 |
| ZNF850       | NM_001267779 | 38.84178218 | 2.474462907 | 0.001237484 | 15.69705574 |
| TTC12        | NM_017868    | 144.0044036 | 5.353078221 | 5.51E-13    | 26.90123283 |
| MKI67        | NM_001145966 | 88.56487506 | 17.57356696 | 7.24E-05    | 5.039664132 |
| PI4K2B       | NM_018323    | 185.7846393 | 4.555520894 | 6.75E-18    | 40.78230429 |

|           |              |             |             |             |             |
|-----------|--------------|-------------|-------------|-------------|-------------|
| C1GALT1   | NM_020156    | 183.7186893 | 4.056909129 | 3.07E-17    | 45.28538438 |
| C10orf107 | NM_173554    | 33.99785007 | 1.216922158 | 0.000807715 | 27.93757172 |
| NLN       | NM_020726    | 78.55606789 | 4.453604755 | 3.16E-06    | 17.63876056 |
| TIPIN     | NM_001289986 | 136.2220179 | 7.706908598 | 5.82E-12    | 17.67531251 |
| PBK       | NM_001278945 | 77.68356436 | 5.646394366 | 1.82E-06    | 13.75808336 |
| CEP135    | NM_025009    | 92.53630363 | 3.689915907 | 1.29E-08    | 25.07816058 |
| SPAG5     | NM_006461    | 72.67916077 | 11.04788432 | 0.000152849 | 6.578559174 |
| FAM227B   | NM_152647    | 111.3604715 | 1.307805147 | 1.30E-10    | 85.15066007 |
| RLF       | NM_012421    | 204.7692786 | 4.411198044 | 2.47E-19    | 46.42033221 |
| MRPL51    | NM_016497    | 199.7648751 | 34.82596646 | 3.12E-08    | 5.736089917 |
| POLR2A    | NM_000937    | 477.7648751 | 20.55679578 | 1.02E-39    | 23.24121327 |
| STARD5    | NM_181900    | 143.1319    | 6.564591523 | 9.96E-13    | 21.80362625 |
| ADRB2     | NM_000024    | 96.5077322  | 14.08476597 | 2.05E-05    | 6.85192302  |
| FAR1      | NM_032228    | 93.56927864 | 3.546213238 | 5.05E-09    | 26.38568872 |
| FGF9      | NM_002010    | 145.0373786 | 7.746073554 | 2.13E-12    | 18.72398675 |
| TST       | NM_001270483 | 95.47475719 | 23.0389376  | 0.000315535 | 4.144060756 |
| ZNF329    | NM_024620    | 109.4549929 | 1.952487573 | 4.44E-12    | 56.05925202 |
| OBFC1     | NM_024928    | 249.4879679 | 12.89405995 | 2.66E-20    | 19.34906219 |
| ATP5B     | NM_001686    | 315.9692786 | 21.47205064 | 1.89E-24    | 14.71537507 |
| C2CD4A    | NM_207322    | 47.81761433 | 4.423313568 | 0.000729597 | 10.81036051 |
| SMNDC1    | NM_005871    | 61.79785007 | 10.0934054  | 0.000619142 | 6.122596651 |
| CYB5B     | NM_030579    | 193.8879679 | 9.818178453 | 4.56E-16    | 19.74785535 |
| FERMT1    | NM_017671    | 171.8044036 | 5.701865892 | 5.48E-16    | 30.13125999 |
| MPHOSPH8  | NM_017520    | 130.1846393 | 11.61752014 | 6.99E-10    | 11.20588884 |
| LOC344967 | NR_027277    | 174.9033286 | 7.368411674 | 8.18E-16    | 23.73691053 |
| OGFOD1    | NM_018233    | 153.1407072 | 5.89090458  | 7.62E-14    | 25.99612761 |
| GRHL2     | NM_024915    | 101.5121358 | 7.186394859 | 8.96E-08    | 14.12559952 |
| CHKB      | NM_005198    | 135.1890429 | 25.47615884 | 9.67E-07    | 5.306492385 |
| MTERF4    | NM_182501    | 159.0176143 | 11.15459795 | 1.59E-12    | 14.25579075 |
| MCC       | NM_001085377 | 82.68796794 | 4.64026661  | 1.17E-06    | 17.81965885 |
| DDI2      | NM_032341    | 62.83082508 | 6.264185249 | 6.03E-05    | 10.03016715 |
| TVP23C    | NM_145301    | 177.8417822 | 6.842945051 | 3.12E-15    | 25.98907062 |
| ATP1B1    | NM_001677    | 181.8132108 | 9.806531709 | 2.22E-15    | 18.54001151 |
| FAM8A1    | NM_016255    | 119.1428571 | 11.57116907 | 8.56E-09    | 10.2965272  |
| RAB25     | NM_020387    | 79.74951438 | 14.93805951 | 0.000196977 | 5.338679656 |
| POLR2E    | NM_002695    | 100.6396323 | 20.8099234  | 3.94E-05    | 4.836136603 |
| DDX59     | NM_001031725 | 130.3451108 | 4.657893739 | 1.64E-12    | 27.9837021  |
| POR       | NM_000941    | 271.2505893 | 10.14046072 | 4.05E-23    | 26.74933583 |
| HSPA9     | NM_004134    | 139.320943  | 14.51421876 | 1.61E-09    | 9.598928143 |
| SNX4      | NR_073435    | 164.0220179 | 3.800231073 | 4.48E-15    | 43.16106436 |
| WDR75     | NM_032168    | 183.8791608 | 1.901205858 | 3.26E-21    | 96.71712296 |
| HEBP2     | NM_014320    | 95.47475719 | 3.30843735  | 7.80E-10    | 28.85796135 |
| SETD5     | NM_001292043 | 44.7186893  | 5.987771395 | 0.002427083 | 7.468336105 |
| RBM15     | NM_001201545 | 139.1604715 | 10.15185025 | 6.12E-11    | 13.70789246 |
| ZNF551    | NM_138347    | 94.60225365 | 9.037169464 | 2.63E-07    | 10.46812877 |
| WDR11-AS1 | NR_033850    | 108.5824894 | 3.406111416 | 2.12E-10    | 31.87872507 |
| LINC00882 | NR_028303    | 159.0176143 | 2.48497188  | 9.12E-16    | 63.99171581 |
| CWC22     | NM_020943    | 108.4220179 | 3.214838439 | 1.32E-10    | 33.72549507 |
| ANKS1A    | NM_015245    | 128.1186893 | 6.339361915 | 5.07E-11    | 20.21002918 |
| CASC10    | NM_001010911 | 130.3451108 | 23.23964343 | 1.40E-06    | 5.608739704 |
| ZNF525    | NR_003699    | 68.86820368 | 3.332326695 | 6.32E-06    | 20.66670227 |
| RANBP10   | NM_020850    | 191.8220179 | 9.733721722 | 2.39E-15    | 19.7069552  |
| TMEM59    | NM_004872    | 94.44178218 | 5.823845385 | 1.42E-07    | 16.21639586 |
| RPL30     | NM_000989    | 209.7736822 | 14.86598263 | 2.33E-16    | 14.11098663 |
| MRPS24    | NM_032014    | 140.1934465 | 10.66481637 | 1.05E-10    | 13.14541588 |
| OXLD1     | NM_001039842 | 189.9165394 | 38.15134597 | 1.28E-07    | 4.977977436 |
| EPCAM     | NM_002354    | 117.3978501 | 9.303175676 | 5.17E-09    | 12.61911568 |
| PAPLN     | NM_173462    | 55.76047148 | 10.66083945 | 0.002682241 | 5.230401579 |
| ATG2B     | NM_018036    | 95.47475719 | 1.988176754 | 3.60E-09    | 48.0212622  |
| CCND1     | NM_053056    | 262.2747572 | 26.10002482 | 8.59E-18    | 10.04883171 |
| EIF4EBP2  | NM_004096    | 198.7319    | 9.360134118 | 2.56E-17    | 21.23173638 |
| TPTE2P1   | NR_026730    | 55.76047148 | 3.786186611 | 2.97E-05    | 14.72734368 |

|              |              |             |             |             |             |
|--------------|--------------|-------------|-------------|-------------|-------------|
| IFT46        | NM_001168618 | 67.67475719 | 7.258920118 | 6.10E-05    | 9.322978638 |
| LINC00466    | NR_038252    | 102.5451108 | 3.004898486 | 1.13E-09    | 34.12598172 |
| C7orf43      | NM_018275    | 175.7758322 | 31.24957381 | 5.15E-09    | 5.624903342 |
| LIPT2        | NM_001144869 | 277.1274965 | 29.29057123 | 9.90E-17    | 9.461320994 |
| LAMP3        | NM_014398    | 59.73190005 | 4.400680949 | 9.68E-05    | 13.5733312  |
| LINC00637    | NR_038436    | 132.0901179 | 15.86162014 | 1.62E-08    | 8.327656111 |
| NAA15        | NM_057175    | 77.68356436 | 4.591718542 | 3.01E-06    | 16.91818948 |
| LOC642852    | NR_026943    | 162.9890429 | 20.02848469 | 2.95E-10    | 8.137861923 |
| FAM58A       | NM_001130997 | 72.5186893  | 4.959799213 | 2.17E-06    | 14.62129537 |
| CDK7         | NM_001799    | 111.520943  | 5.411211456 | 7.79E-10    | 20.60923767 |
| CATSPER2P1   | NR_002318    | 211.6791608 | 9.464709128 | 1.19E-18    | 22.36509943 |
| MCM6         | NM_005915    | 140.1934465 | 9.048522825 | 7.56E-11    | 15.49351747 |
| C9orf85      | NM_182505    | 108.4220179 | 2.930197388 | 1.16E-10    | 37.00160895 |
| ALKBH4       | NM_017621    | 74.7451108  | 7.958452741 | 3.16E-05    | 9.39191489  |
| MYCBP        | NM_012333    | 103.5780858 | 6.027318118 | 4.61E-09    | 17.1847717  |
| STARD9       | NM_020759    | 109.2945215 | 5.938471631 | 3.68E-09    | 18.40448658 |
| ZFAND3       | NM_021943    | 59.73190005 | 4.680307618 | 0.000142833 | 12.76238763 |
| DCAF12       | NM_015397    | 93.56927864 | 9.658610865 | 1.76E-06    | 9.68765384  |
| NUS1         | NM_138459    | 66.64178218 | 4.211243773 | 2.43E-05    | 15.82472679 |
| ARL1         | NM_001177    | 150.3627251 | 4.630904383 | 7.66E-15    | 32.46940829 |
| LINC00657    | NR_027451    | 413.1890429 | 11.08446803 | 1.51E-42    | 37.2763981  |
| SREK1IP1     | NM_173829    | 157.9846393 | 2.524416778 | 1.61E-16    | 62.58262927 |
| JMJD7        | NM_001114632 | 158.1451108 | 16.17386484 | 4.13E-11    | 9.777818247 |
| LINC00379    | NR_047004    | 37.80880717 | 0.857245216 | 0.000327937 | 44.10500804 |
| KCNK6        | NM_004823    | 160.0505893 | 7.198786715 | 2.93E-14    | 22.23299504 |
| IMPA2        | NM_014214    | 193.7274965 | 8.881084795 | 5.25E-16    | 21.81349474 |
| KRI1         | NM_023008    | 161.0835644 | 20.24313885 | 2.96E-10    | 7.957440078 |
| PLEKHM3      | NM_001080475 | 228.4373786 | 4.59684242  | 8.35E-21    | 49.69441146 |
| WDR3         | NM_006784    | 117.3978501 | 2.383483966 | 1.54E-12    | 49.25472618 |
| SLC31A2      | NM_001860    | 91.50332862 | 15.26339293 | 2.71E-05    | 5.994953354 |
| TMED7-TICAM2 | NM_001164468 | 100.4791608 | 6.507877072 | 9.42E-08    | 15.43962181 |
| THUMP3-AS1   | NR_027007    | 273.1560679 | 27.46148724 | 2.31E-18    | 9.946878167 |
| ZNF674-AS1   | NR_015378    | 71.64618576 | 10.59306009 | 0.000192153 | 6.763502252 |
| C1orf220     | NR_033186    | 33.8373786  | 1.297896233 | 0.000913477 | 26.07094292 |
| TMEM104      | NM_017728    | 156.2396323 | 14.4931679  | 2.52E-11    | 10.78022647 |
| TPST1        | NM_003596    | 298.1780858 | 3.132399876 | 9.10E-30    | 95.19157757 |
| TMEM55A      | NM_018710    | 159.0176143 | 3.781684958 | 2.92E-15    | 42.04940816 |
| RNF114       | NM_018683    | 223.432975  | 11.36724821 | 4.06E-19    | 19.65585433 |
| MIS18BP1     | NM_018353    | 103.4176143 | 4.039872486 | 5.18E-09    | 25.59922737 |
| FAM118A      | NM_001104595 | 121.3692786 | 15.13827463 | 1.61E-07    | 8.017378575 |
| ANKRA2       | NM_023039    | 123.2747572 | 7.038844079 | 4.01E-10    | 17.51349452 |
| LINC00884    | NR_033929    | 71.64618576 | 9.008742142 | 0.000217356 | 7.952962204 |
| BTC          | NM_001729    | 83.56047148 | 3.942035374 | 5.51E-07    | 21.19729113 |
| GABRQ        | NM_018558    | 65.60880717 | 6.362652581 | 8.22E-05    | 10.31154952 |
| CCDC157      | NM_001017437 | 184.9121358 | 20.70468326 | 2.81E-12    | 8.930932844 |
| ELL          | NM_006532    | 141.2264215 | 10.39547775 | 1.63E-10    | 13.58537095 |
| ALDH9A1      | NM_000696    | 214.6176143 | 4.547769884 | 1.72E-21    | 47.19183684 |
| ATF6         | NM_007348    | 101.5121358 | 3.449565164 | 1.34E-09    | 29.4275165  |
| ZFX4         | NM_024721    | 46.9451108  | 4.126561418 | 0.000554205 | 11.37632669 |
| MED16        | NM_005481    | 93.40880717 | 14.28388274 | 6.53E-06    | 6.539454915 |
| ATXN1L       | NM_001137675 | 60.92534654 | 8.587394784 | 0.000981658 | 7.094741545 |
| DEGS1        | NM_003676    | 205.6417822 | 6.19888044  | 4.76E-20    | 33.17401975 |
| GTF2H2       | NM_001515    | 199.7648751 | 4.98116112  | 6.84E-20    | 40.1040782  |
| CCDC171      | NM_173550    | 106.5165394 | 1.384890151 | 6.47E-10    | 76.9133489  |
| FNBP1        | NM_015033    | 165.9274965 | 4.845602453 | 9.22E-15    | 34.24290335 |
| ENTPD1-AS1   | NR_038444    | 70.61321075 | 4.344153024 | 1.30E-05    | 16.25477057 |
| GABRE        | NM_004961    | 91.34285714 | 4.943542075 | 3.56E-08    | 18.4772084  |
| POLR2J3      | NM_001097615 | 131.2176143 | 6.961845415 | 5.50E-11    | 18.84810801 |
| EMC8         | NM_006067    | 101.6726073 | 18.88700504 | 1.34E-05    | 5.383204328 |
| GCSH         | NR_033249    | 57.8264215  | 10.13577653 | 0.002105108 | 5.705179206 |
| FSCN1        | NM_003088    | 406.4396323 | 20.50240882 | 6.34E-33    | 19.82399414 |
| FLOT2        | NM_004475    | 108.4220179 | 14.68536513 | 1.07E-06    | 7.382997766 |

|                |              |             |             |             |             |
|----------------|--------------|-------------|-------------|-------------|-------------|
| CCDC97         | NM_052848    | 318.9077322 | 24.73678596 | 2.97E-23    | 12.89204397 |
| HNRNPUL1       | NM_144732    | 72.5186893  | 12.61561809 | 0.000592137 | 5.748326301 |
| PDCD7          | NM_005707    | 195.7934465 | 10.63676515 | 1.39E-16    | 18.40723601 |
| LOC646626      | NR_045484    | 171.9648751 | 35.40293799 | 5.25E-07    | 4.8573617   |
| TMEM198        | NM_001005209 | 77.68356436 | 13.62235795 | 0.000237325 | 5.702651821 |
| KLHL7-AS1      | NR_046220    | 185.9451108 | 17.33359973 | 6.89E-13    | 10.72743767 |
| UBFD1          | NM_019116    | 72.67916077 | 11.38514221 | 0.000138868 | 6.38368493  |
| FAM122A        | NM_138333    | 160.9230929 | 4.61403405  | 1.76E-16    | 34.87687589 |
| PDS5A          | NM_001100399 | 41.78023574 | 5.677014928 | 0.004459225 | 7.359543047 |
| PCIF1          | NM_022104    | 261.2417822 | 22.32070176 | 2.00E-18    | 11.70401294 |
| PDP2           | NM_020786    | 143.1319    | 9.846256242 | 1.85E-11    | 14.53668242 |
| CIT            | NM_007174    | 109.4549929 | 6.378388759 | 4.06E-09    | 17.16028876 |
| IMPDH2         | NM_000884    | 282.2923715 | 69.01984449 | 6.12E-11    | 4.090017496 |
| KIAA0922       | NM_015196    | 200.6373786 | 5.790899765 | 5.25E-18    | 34.64701285 |
| EMC10          | NM_206538    | 217.8770108 | 10.0892742  | 1.64E-19    | 21.59491422 |
| MSH3           | NM_002439    | 208.7407072 | 4.235806258 | 7.38E-19    | 49.28004127 |
| A4GALT         | NM_017436    | 57.66595002 | 9.153984196 | 0.000803431 | 6.299546601 |
| DAK            | NM_015533    | 260.2088072 | 25.55272891 | 2.49E-17    | 10.1832101  |
| TMEM189-UBE2V1 | NM_199203    | 114.298925  | 14.45028373 | 1.76E-07    | 7.909804896 |
| NUP205         | NM_015135    | 116.3648751 | 3.870668816 | 3.17E-10    | 30.06324762 |
| SLC25A53       | NM_001012755 | 100.3186893 | 3.554111066 | 1.13E-09    | 28.22609858 |
| LMBRD2         | NM_001007527 | 97.70117869 | 2.596846112 | 1.21E-09    | 37.62301441 |
| COMMD2         | NM_016094    | 121.3692786 | 4.84496526  | 5.15E-11    | 25.05059833 |
| C3orf67        | NM_198463    | 243.4505893 | 2.294889602 | 1.12E-23    | 106.0837912 |
| ALKBH8         | NM_001301010 | 61.79785007 | 2.389426366 | 7.59E-06    | 25.86304854 |
| CASC3          | NM_007359    | 65.60880717 | 7.88297719  | 0.000138943 | 8.322846253 |
| ZFYVE20        | NM_022340    | 107.3890429 | 8.507446359 | 1.12E-08    | 12.62294681 |
| PRR14L         | NM_173566    | 234.4747572 | 8.471486115 | 1.18E-20    | 27.67811385 |
| VAC14          | NM_018052    | 92.53630363 | 9.411417555 | 9.59E-07    | 9.832344924 |
| KLF2           | NM_016270    | 164.8945215 | 24.41343544 | 4.36E-09    | 6.754253078 |
| ATP6V1G1       | NM_004888    | 159.0176143 | 9.595082819 | 2.46E-13    | 16.57282353 |
| HILPDA         | NM_001098786 | 210.8066572 | 13.29482852 | 1.13E-16    | 15.85629005 |
| LOC728613      | NR_003713    | 141.06595   | 8.191378514 | 1.01E-11    | 17.22127109 |
| SULT1C2        | NM_001056    | 51.7890429  | 6.003962253 | 0.000553156 | 8.625810876 |
| EIF4B          | NM_001300821 | 86.65939651 | 13.69916017 | 3.96E-05    | 6.325891183 |
| HTATSF1        | NM_014500    | 61.6373786  | 2.606251914 | 1.76E-06    | 23.64981615 |
| LOC100131655   | NR_040024    | 159.8901179 | 9.590826625 | 5.32E-13    | 16.67115089 |
| DIO3           | NM_001362    | 64.57583215 | 14.31132503 | 0.004156636 | 4.512218962 |
| ZDHHC6         | NM_022494    | 324.9451108 | 8.856812935 | 6.91E-32    | 36.68871785 |
| SLC35E2B       | NM_001290264 | 181.9736822 | 12.53636186 | 3.71E-14    | 14.51566924 |
| ZNF593         | NM_015871    | 113.26595   | 23.23625188 | 0.000290639 | 4.874536161 |
| UBE2Q2         | NM_001145335 | 103.5780858 | 3.459782019 | 5.34E-10    | 29.93774904 |
| DIEXF          | NM_014388    | 87.53190005 | 5.019197517 | 1.12E-07    | 17.43942129 |
| LINC00568      | NR_051960    | 131.2176143 | 20.06001588 | 4.55E-07    | 6.541251769 |
| ZPR1           | NM_003904    | 125.1802357 | 11.32442464 | 1.37E-09    | 11.05400404 |
| ARHGAP5-AS1    | NR_027263    | 139.1604715 | 24.71040951 | 2.86E-06    | 5.631653794 |
| FAM21EP        | NR_038275    | 48.85058935 | 5.027633968 | 0.001221343 | 9.716417237 |
| SAP30L-AS1     | NR_037897    | 167.9934465 | 8.977515633 | 2.85E-14    | 18.71268771 |
| CHRNA5         | NM_000745    | 100.4791608 | 4.35804552  | 5.64E-09    | 23.05601452 |
| KPNA6          | NM_012316    | 104.2901179 | 6.383213819 | 5.10E-09    | 16.33818337 |
| LOC100131347   | NR_036551    | 212.7121358 | 8.467919157 | 1.05E-18    | 25.11976459 |
| ZNF487         | NR_026693    | 73.55166431 | 7.643168461 | 2.60E-05    | 9.623190263 |
| CPNE3          | NM_003909    | 201.6703536 | 8.310176124 | 6.75E-18    | 24.2678796  |
| TRIM62         | NM_018207    | 60.60440358 | 12.37917859 | 0.001616781 | 4.89567245  |
| LOC285074      | NR_026846    | 45.91213579 | 4.711582548 | 0.002176112 | 9.744525395 |
| HOOK1          | NM_015888    | 46.78463932 | 0.376263286 | 1.11E-05    | 124.3401656 |
| SLC30A4        | NM_013309    | 51.94951438 | 2.65139693  | 9.75E-05    | 19.59326187 |
| FANCG          | NM_004629    | 185.9451108 | 23.42715917 | 1.12E-11    | 7.937160006 |
| OIP5-AS1       | NR_026757    | 249.3274965 | 12.62021647 | 4.48E-21    | 19.75619808 |
| TMX4           | NM_021156    | 185.7846393 | 4.667763996 | 4.33E-18    | 39.8016351  |
| BRIP1          | NM_032043    | 249.6484394 | 3.13029391  | 1.89E-24    | 79.75239598 |
| C9orf41-AS1    | NR_121183    | 48.85058935 | 5.127150499 | 0.001213424 | 9.527824346 |

|              |              |             |             |             |             |
|--------------|--------------|-------------|-------------|-------------|-------------|
| ING3         | NM_019071    | 101.3516643 | 3.619289338 | 2.97E-09    | 28.00319478 |
| PIBF1        | NM_006346    | 123.2747572 | 2.796138712 | 1.32E-11    | 44.08749703 |
| ZNF696       | NM_030895    | 296.2726073 | 18.5248176  | 6.34E-24    | 15.99328067 |
| LOC102724301 | NR_120587    | 93.72975012 | 15.82825916 | 1.24E-05    | 5.921671434 |
| URB2         | NM_014777    | 124.3077322 | 4.198368609 | 1.05E-11    | 29.60857985 |
| PGM2L1       | NM_173582    | 180.7802357 | 2.627887485 | 1.25E-18    | 68.79298934 |
| BCL9L        | NM_182557    | 87.37142857 | 11.65285763 | 1.31E-05    | 7.497854289 |
| ORMDL2       | NM_014182    | 183.0066572 | 25.2978383  | 1.94E-10    | 7.234082812 |
| HSDL1        | NM_031463    | 118.2703536 | 12.00262811 | 4.65E-08    | 9.853704748 |
| LINC01278    | NR_015353    | 78.55606789 | 1.862580944 | 3.35E-07    | 42.17592161 |
| ANKRD32      | NM_032290    | 180.0682037 | 3.091992761 | 3.15E-18    | 58.23694218 |
| LRRC57       | NM_153260    | 248.4549929 | 10.51388379 | 6.13E-23    | 23.63113365 |
| PCNT         | NM_006031    | 85.46595002 | 6.941446735 | 3.02E-06    | 12.3124117  |
| DHTKD1       | NM_018706    | 148.1363036 | 8.359043046 | 2.42E-12    | 17.72168211 |
| ZNF91        | NM_003430    | 42.97368223 | 2.09920855  | 0.000654201 | 20.47137347 |
| EIF2B1       | NM_001414    | 156.0791608 | 20.40358242 | 5.36E-10    | 7.649595917 |
| MRPL47       | NM_177988    | 96.5077322  | 4.339721371 | 3.65E-09    | 22.23823235 |
| MTHFR        | NM_005957    | 115.4923715 | 15.4122458  | 3.74E-07    | 7.493545914 |
| CCNE2        | NM_057749    | 267.6001037 | 15.3146712  | 4.94E-22    | 17.47344754 |
| SNHG22       | NR_117096    | 203.5758322 | 7.234624394 | 2.46E-18    | 28.13910178 |
| SLC5A6       | NR_028323    | 179.9077322 | 17.47873174 | 2.61E-12    | 10.29295116 |
| PNPT1        | NM_033109    | 101.5121358 | 3.126955323 | 5.01E-10    | 32.46357089 |
| B3GNT5       | NM_032047    | 47.81761433 | 5.258529234 | 0.00095496  | 9.093343824 |
| TVP23B       | NM_016078    | 188.7230929 | 8.496897606 | 3.46E-16    | 22.21082348 |
| FAM83G       | NM_001039999 | 69.58023574 | 12.01190013 | 0.00031454  | 5.792608577 |
| TMEM159      | NM_020422    | 155.9186893 | 8.515217143 | 4.85E-13    | 18.31059463 |
| LINC00271    | NR_026805    | 158.1451108 | 2.283247811 | 2.93E-15    | 69.26322671 |
| SLC27A1      | NM_198580    | 79.5890429  | 15.42572149 | 0.000347252 | 5.159502131 |
| NXT1         | NM_013248    | 67.83522867 | 14.03195621 | 0.00213375  | 4.834338681 |
| AKAP8        | NM_005858    | 207.5472607 | 12.26550241 | 6.75E-17    | 16.92121968 |
| NEAT1        | NR_028272    | 338.7648751 | 72.75641277 | 4.31E-14    | 4.656151426 |
| FAF1         | NM_007051    | 166.9604715 | 4.067257269 | 1.30E-15    | 41.04989196 |
| GALNT4       | NM_003774    | 96.5077322  | 4.794091937 | 6.82E-09    | 20.13055517 |
| XXYLT1       | NM_152531    | 146.2308251 | 8.13079158  | 1.03E-11    | 17.98482025 |
| MYCBP2       | NM_015057    | 172.8373786 | 2.425788461 | 1.74E-16    | 71.24997969 |
| PDCD5        | NM_004708    | 160.0505893 | 14.1439982  | 1.38E-11    | 11.31579537 |
| CATSPERD     | NM_152784    | 43.84618576 | 5.651215049 | 0.004159825 | 7.758718325 |
| RSRP1        | NM_020317    | 293.0132108 | 28.86943507 | 8.08E-20    | 10.14959974 |
| KIF5B        | NM_004521    | 363.6264215 | 4.606563591 | 4.35E-37    | 78.93659    |
| SOD1         | NM_000454    | 233.4417822 | 14.08990139 | 6.03E-19    | 16.56802101 |
| ETV5         | NM_004454    | 197.698925  | 8.21649431  | 4.36E-17    | 24.06122582 |
| HNRNPA3      | NM_194247    | 87.69237152 | 15.11716698 | 4.20E-05    | 5.800846919 |
| ZFP91        | NM_053023    | 41.78023574 | 4.03833955  | 0.003758256 | 10.3458947  |
| SLC17A5      | NM_012434    | 61.79785007 | 4.150230302 | 5.87E-05    | 14.89022189 |
| DTD2         | NM_080664    | 164.0220179 | 3.171295041 | 6.05E-18    | 51.72083196 |
| RPL23A       | NM_000984    | 243.4505893 | 35.18545846 | 1.55E-13    | 6.919068275 |
| PRDX4        | NM_006406    | 147.1033286 | 3.438084732 | 3.27E-15    | 42.78641747 |
| KCTD3        | NM_016121    | 58.85939651 | 2.338193688 | 1.37E-05    | 25.17302002 |
| ARF3         | NM_001659    | 206.6747572 | 12.17902385 | 6.87E-17    | 16.96973088 |
| UBAC2-AS1    | NR_036532    | 248.4549929 | 21.3986404  | 1.28E-17    | 11.61078406 |
| SLC8B1       | NM_024959    | 325.9780858 | 11.94704899 | 2.35E-28    | 27.2852389  |
| SLC35G1      | NM_153226    | 266.2461858 | 7.759071227 | 1.01E-26    | 34.31418245 |
| TCTN2        | NM_024809    | 57.8264215  | 6.531322979 | 0.000201044 | 8.853707233 |
| FABP5P3      | NR_002935    | 78.55606789 | 2.843673801 | 2.83E-08    | 27.624852   |
| MED29        | NM_017592    | 252.26595   | 18.28630179 | 1.87E-19    | 13.79535091 |
| XKR8         | NM_018053    | 205.8022537 | 16.5181882  | 4.43E-15    | 12.45912997 |
| LOC100134868 | NR_004846    | 120.3363036 | 7.596173085 | 7.40E-10    | 15.84170112 |
| DDA1         | NM_024050    | 102.3846393 | 16.67279564 | 9.63E-06    | 6.140820143 |
| PPP1R15A     | NM_014330    | 251.553918  | 25.59146223 | 8.47E-17    | 9.829603157 |
| SNW1         | NM_012245    | 87.69237152 | 10.57291602 | 6.13E-06    | 8.294057321 |
| DNAJC24      | NM_181706    | 197.8593965 | 4.003161801 | 7.68E-19    | 49.4257805  |
| JPH1         | NM_020647    | 99.60665724 | 7.242881359 | 1.36E-07    | 13.75235245 |

|                |              |             |             |             |             |
|----------------|--------------|-------------|-------------|-------------|-------------|
| C5orf42        | NM_023073    | 211.6791608 | 2.517038364 | 4.26E-21    | 84.09850394 |
| ZNF202         | NM_003455    | 156.9516643 | 10.05087819 | 2.47E-12    | 15.6157165  |
| NHLRC2         | NM_198514    | 117.3978501 | 4.955755033 | 2.59E-10    | 23.68919555 |
| USP53          | NM_019050    | 229.4703536 | 2.925140438 | 1.40E-23    | 78.44763642 |
| SRRD           | NM_001013694 | 82.52749646 | 11.53572307 | 2.37E-05    | 7.154080932 |
| KPNA5          | NM_002269    | 151.0747572 | 2.404271649 | 1.15E-15    | 62.83597666 |
| LRRC59         | NM_018509    | 221.6879679 | 21.55230096 | 2.88E-15    | 10.28604641 |
| ANKRD39        | NM_016466    | 213.7451108 | 12.6305309  | 1.50E-17    | 16.92289203 |
| MANF           | NM_006010    | 189.9165394 | 26.93048872 | 7.81E-11    | 7.05210148  |
| SPICE1         | NM_144718    | 167.120943  | 2.639939797 | 6.28E-17    | 63.3048311  |
| TMEM62         | NM_024956    | 147.1033286 | 5.535432968 | 2.90E-13    | 26.57485502 |
| TMLHE          | NM_001184797 | 101.3516643 | 1.633877443 | 1.09E-09    | 62.03137496 |
| F3             | NM_001993    | 115.1714286 | 11.40379902 | 3.76E-08    | 10.0993913  |
| CAND1          | NM_018448    | 99.44618576 | 6.274019234 | 1.40E-08    | 15.85047512 |
| TSPAN12        | NM_012338    | 118.5912966 | 3.039078411 | 8.69E-12    | 39.02212464 |
| GALNT7         | NM_017423    | 75.45714286 | 3.127975424 | 8.58E-07    | 24.12331704 |
| ADCK5          | NM_174922    | 380.5451108 | 18.85987776 | 1.08E-30    | 20.17749615 |
| ZNF597         | NM_152457    | 109.4549929 | 6.096086219 | 1.81E-09    | 17.95496143 |
| SCOC-AS1       | NR_033939    | 133.2835644 | 5.705700015 | 8.59E-12    | 23.35972169 |
| TAF5           | NM_006951    | 152.1077322 | 15.39531188 | 1.51E-10    | 9.880133214 |
| HSP90B1        | NM_003299    | 174.0308251 | 9.156794681 | 4.44E-15    | 19.00564894 |
| SPPL2B         | NM_001077238 | 153.1407072 | 8.807787776 | 1.60E-12    | 17.38696607 |
| LINC00839      | NR_026827    | 103.4176143 | 4.626747971 | 1.44E-09    | 22.35211751 |
| GTF3C4         | NM_012204    | 93.40880717 | 8.496504455 | 9.62E-07    | 10.99379253 |
| ATP6V0D2       | NM_152565    | 46.78463932 | 6.322022167 | 0.002345142 | 7.400264992 |
| SHPK           | NM_013276    | 164.0220179 | 8.079311829 | 2.57E-14    | 20.30148376 |
| NABP2          | NM_024068    | 116.3648751 | 8.763479092 | 1.12E-09    | 13.27838794 |
| ASNA1          | NM_004317    | 113.4264215 | 9.753365594 | 2.12E-08    | 11.62946476 |
| LOC101927592   | NR_104646    | 53.69452145 | 3.051732357 | 7.89E-05    | 17.59476755 |
| HAT1           | NR_027862    | 105.4835644 | 5.663636206 | 4.78E-09    | 18.62470691 |
| SNIP1          | NM_024700    | 78.71653937 | 10.21503953 | 2.45E-05    | 7.705945641 |
| PIGB           | NM_004855    | 142.2593965 | 6.109066514 | 3.22E-12    | 23.28660135 |
| DNTTIP2        | NM_014597    | 138.2879679 | 2.590975652 | 2.71E-15    | 53.37293226 |
| MTG2           | NM_015666    | 95.47475719 | 9.452477983 | 1.07E-06    | 10.10050035 |
| SP4            | NM_003112    | 51.62857143 | 3.408058678 | 0.00013926  | 15.14896787 |
| ACSL4          | NM_004458    | 46.78463932 | 2.309875586 | 0.00047002  | 20.25418148 |
| RNF10          | NM_014868    | 96.5077322  | 10.23473516 | 1.03E-06    | 9.429431315 |
| MRPS10         | NM_018141    | 98.41321075 | 6.999073254 | 3.05E-08    | 14.06089166 |
| SCAF11         | NM_004719    | 169.0264215 | 4.141499396 | 1.26E-15    | 40.81285673 |
| CCDC23         | NM_199342    | 59.57142857 | 11.6739954  | 0.003070163 | 5.102916914 |
| UBQLN2         | NM_013444    | 129.1516643 | 7.555111912 | 6.57E-11    | 17.09460638 |
| SART3          | NM_014706    | 62.83082508 | 7.986903445 | 0.000266504 | 7.866731521 |
| LOC101927572   | NM_001290056 | 104.6110608 | 10.47720796 | 1.42E-07    | 9.984631516 |
| UCP2           | NM_003355    | 175.9363036 | 12.67882167 | 7.65E-14    | 13.87639231 |
| CCDC147-AS1    | NR_108036    | 98.41321075 | 18.38092396 | 0.00012194  | 5.354094874 |
| NCL            | NM_005381    | 314.9363036 | 20.06771232 | 2.42E-24    | 15.6936824  |
| PDZD7          | NM_001195263 | 116.5253465 | 16.42405823 | 2.44E-07    | 7.094796237 |
| ZNF252P-AS1    | NR_026974    | 233.6022537 | 40.15389658 | 1.03E-11    | 5.81767334  |
| GLYR1          | NM_032569    | 189.9165394 | 12.53175823 | 1.80E-14    | 15.15481993 |
| NUDCD3         | NM_015332    | 147.2638001 | 8.088695851 | 4.17E-12    | 18.20612405 |
| SOCS2-AS1      | NR_038263    | 113.4264215 | 26.97837711 | 3.83E-05    | 4.204345615 |
| C15orf38-AP3S2 | NM_001199058 | 65.76927864 | 9.964871513 | 0.000602732 | 6.600113063 |
| TMEM63A        | NM_014698    | 187.8505893 | 13.49211279 | 1.57E-14    | 13.92299281 |
| RARS           | NM_002887    | 341.7033286 | 7.406423993 | 5.88E-33    | 46.13607443 |
| LOC154761      | NR_015421    | 102.3846393 | 5.528390816 | 3.03E-09    | 18.51979043 |
| HIAT1          | NM_033055    | 154.0132108 | 6.542229357 | 3.51E-13    | 23.54139581 |
| CREBL2         | NM_001310    | 108.4220179 | 5.303534882 | 1.09E-09    | 20.44334964 |
| ESAM           | NM_138961    | 194.7604715 | 16.12148098 | 2.42E-14    | 12.08080521 |
| SDF4           | NM_016176    | 157.9846393 | 9.975652098 | 1.64E-12    | 15.83702376 |
| SDHAP3         | NR_003263    | 73.55166431 | 6.468474833 | 1.67E-05    | 11.37078928 |
| POLK           | NM_016218    | 65.76927864 | 2.677265443 | 4.84E-06    | 24.56584155 |
| RAD18          | NM_020165    | 115.3319    | 3.309045417 | 5.06E-11    | 34.85352587 |



|              |              |             |             |             |             |
|--------------|--------------|-------------|-------------|-------------|-------------|
| FAM129A      | NM_052966    | 39.00225365 | 3.320238051 | 0.001880868 | 11.74682449 |
| PLD2         | NM_002663    | 133.1230929 | 9.144096021 | 7.17E-11    | 14.55836559 |
| PDCD11       | NM_014976    | 204.7692786 | 13.71352169 | 5.73E-16    | 14.93192509 |
| KDELC1       | NM_024089    | 138.2879679 | 6.24412272  | 1.32E-12    | 22.14690104 |
| DESII        | NM_015704    | 252.26595   | 12.8823239  | 1.55E-20    | 19.5823325  |
| MGAT2        | NM_002408    | 220.6549929 | 9.241333553 | 1.50E-19    | 23.87696447 |
| GREB1L       | NM_001142966 | 97.54070721 | 4.546541792 | 5.01E-08    | 21.45382396 |
| ASF1B        | NM_018154    | 269.3451108 | 20.365652   | 1.09E-19    | 13.22545975 |
| FAM66C       | NR_026788    | 77.68356436 | 4.822776739 | 1.16E-06    | 16.10764266 |
| POLR2B       | NM_000938    | 139.1604715 | 5.80612479  | 1.26E-12    | 23.9678747  |
| IARS2        | NM_018060    | 175.9363036 | 4.681320851 | 1.07E-16    | 37.58262021 |
| CDCA8        | NM_001256875 | 109.4549929 | 13.85767002 | 9.68E-07    | 7.898513442 |
| C10orf10     | NM_007021    | 166.0879679 | 14.54250544 | 9.65E-12    | 11.42086339 |
| LRRC41       | NM_006369    | 118.2703536 | 23.55423347 | 9.36E-06    | 5.021193059 |
| SLC2A1-AS1   | NR_033967    | 69.74070721 | 10.8847     | 0.000280769 | 6.407223643 |
| PRSS22       | NM_022119    | 82.52749646 | 10.59651717 | 1.16E-05    | 7.788171827 |
| CIRH1A       | NM_032830    | 129.1516643 | 7.296742849 | 1.22E-10    | 17.69990624 |
| MYO9A        | NM_006901    | 142.098925  | 2.607233342 | 1.40E-13    | 54.5018057  |
| DHX38        | NM_014003    | 60.76487506 | 10.89477369 | 0.001371497 | 5.577433438 |
| BOK-AS1      | NR_033346    | 73.55166431 | 11.02391683 | 7.02E-05    | 6.672008272 |
| LOC100505549 | NM_001242804 | 79.5890429  | 5.212972583 | 1.12E-06    | 15.26749693 |
| SAT2         | NM_133491    | 163.8615464 | 27.90504768 | 7.10E-08    | 5.872111323 |
| FANCM        | NM_020937    | 155.0461858 | 3.501041878 | 2.29E-14    | 44.28572727 |
| NUP88        | NM_002532    | 190.9495144 | 8.563004716 | 3.99E-16    | 22.29935878 |
| MTFMT        | NM_139242    | 253.298925  | 8.756907631 | 5.38E-23    | 28.92561344 |
| FAM64A       | NM_019013    | 89.4373786  | 13.70930537 | 2.20E-05    | 6.523844656 |
| ARFGEF2      | NM_006420    | 50.75606789 | 7.377910975 | 0.002827576 | 6.879463314 |
| RAD21L1      | NM_001136566 | 182.6857143 | 2.88511288  | 2.29E-19    | 63.3201271  |
| SUCLG2-AS1   | NR_109992    | 119.3033286 | 1.315370435 | 1.74E-11    | 90.69941474 |
| WBP4         | NM_007187    | 214.6176143 | 4.899280313 | 2.06E-21    | 43.80594712 |
| FBXW9        | NM_032301    | 61.6373786  | 13.41686924 | 0.001644933 | 4.594020966 |
| NDUFB7       | NM_004146    | 120.3363036 | 22.20190851 | 4.07E-06    | 5.42008826  |
| GPSM2        | NM_013296    | 130.1846393 | 5.690043606 | 9.63E-12    | 22.87937463 |
| CPQ          | NM_016134    | 62.83082508 | 1.790854475 | 1.27E-05    | 35.08427176 |
| ITGB8        | NM_002214    | 48.69011787 | 2.681110702 | 0.000250998 | 18.160428   |
| ZNF517       | NM_213605    | 177.8417822 | 13.62102524 | 2.63E-13    | 13.05641676 |
| FTSJ2        | NM_013393    | 126.2132108 | 16.8675998  | 1.37E-07    | 7.482582717 |
| CWF19L2      | NM_152434    | 85.46595002 | 1.815119612 | 4.19E-08    | 47.08557467 |
| RAB33B       | NM_031296    | 150.0417822 | 8.075751715 | 1.72E-12    | 18.57929608 |
| RHOF         | NM_019034    | 122.5627251 | 23.95374429 | 2.63E-06    | 5.116641625 |
| CDK4         | NM_000075    | 90.47035361 | 16.40536714 | 8.11E-05    | 5.514680215 |
| MIOS         | NM_019005    | 93.56927864 | 1.672968857 | 7.76E-10    | 55.93007798 |
| FAM126A      | NM_032581    | 265.2132108 | 2.400097912 | 1.30E-28    | 110.5009964 |
| SCO1         | NM_004589    | 174.9033286 | 4.827434208 | 3.14E-17    | 36.23111597 |
| KIAA0195     | NM_014738    | 81.65499293 | 12.75638816 | 7.07E-05    | 6.401106009 |
| LIX1L        | NM_153713    | 55.76047148 | 9.093745833 | 0.000770392 | 6.131738505 |
| ARHGAP31     | NM_020754    | 56.79344649 | 7.718615125 | 0.000959532 | 7.357983986 |
| ARID5A       | NM_212481    | 136.0615464 | 8.713977037 | 2.98E-11    | 15.61417317 |
| ZNF852       | NM_001287349 | 58.69892504 | 7.072693761 | 0.000259683 | 8.299373198 |
| FAM219B      | NM_020447    | 123.4352287 | 28.07054806 | 1.05E-05    | 4.397321649 |
| LGALS1       | NM_014181    | 62.67035361 | 11.21806607 | 0.001395026 | 5.586555935 |
| NFKBIA       | NM_020529    | 132.0901179 | 19.65252256 | 1.77E-07    | 6.721280563 |
| LTN1         | NM_015565    | 170.9319    | 1.750080026 | 2.03E-18    | 97.67090504 |
| UBA6-AS1     | NR_015439    | 62.67035361 | 7.718506263 | 0.000212989 | 8.119492486 |
| RNF220       | NM_018150    | 90.47035361 | 7.931321998 | 1.04E-06    | 11.40671803 |
| C7orf26      | NM_024067    | 83.72094295 | 10.17156331 | 1.27E-05    | 8.230882551 |
| PIGL         | NM_004278    | 194.920943  | 6.078238068 | 1.20E-17    | 32.06865884 |
| SLC7A6OS     | NM_032178    | 209.7736822 | 11.52571598 | 7.96E-18    | 18.20049034 |
| LOC100996654 | NR_110040    | 155.0461858 | 4.884196987 | 2.18E-14    | 31.74445793 |
| DDX1         | NM_004939    | 182.8461858 | 6.377570809 | 2.66E-16    | 28.67019297 |
| TAF1D        | NM_024116    | 194.7604715 | 20.31586777 | 5.70E-13    | 9.586618387 |
| ASAH2B       | NM_001079516 | 235.6682037 | 2.922001439 | 2.56E-27    | 80.65300741 |

|              |              |             |             |             |             |
|--------------|--------------|-------------|-------------|-------------|-------------|
| B3GNTL1      | NM_001009905 | 204.7692786 | 6.734341678 | 1.07E-17    | 30.40672547 |
| RNF11        | NM_014372    | 87.53190005 | 6.414411149 | 9.95E-07    | 13.64613181 |
| FASTKD1      | NR_104020    | 81.49452145 | 3.393610079 | 5.63E-08    | 24.01410874 |
| VPS37B       | NM_024667    | 176.9692786 | 10.43192022 | 1.44E-14    | 16.96420935 |
| F5           | NM_000130    | 57.66595002 | 2.885845203 | 3.45E-05    | 19.98234346 |
| ALKBH1       | NM_006020    | 153.1407072 | 6.726634674 | 2.34E-13    | 22.76631847 |
| KDM4D        | NM_018039    | 58.69892504 | 2.970621879 | 9.20E-06    | 19.75981038 |
| KIAA1468     | NM_020854    | 224.6264215 | 2.654041002 | 8.54E-23    | 84.63562596 |
| LOC100505812 | NR_040599    | 179.0352287 | 3.260065412 | 2.29E-19    | 54.91767988 |
| KIAA0368     | NM_001080398 | 70.61321075 | 3.366134004 | 1.58E-06    | 20.97754001 |
| ZNF346       | NM_012279    | 169.0264215 | 8.20543687  | 1.74E-14    | 20.59932021 |
| ARHGEF26-AS1 | NR_037901    | 135.1890429 | 3.535422627 | 5.00E-13    | 38.23843912 |
| BRCA2        | NM_000059    | 225.498925  | 4.162447546 | 1.94E-21    | 54.17459861 |
| CLIC4        | NM_013943    | 115.4923715 | 3.512348809 | 6.14E-11    | 32.88180582 |
| PRKAR2A      | NM_004157    | 198.8923715 | 5.429167625 | 2.27E-18    | 36.63404508 |
| CFAP58       | NM_001008723 | 40.19570014 | 2.205561468 | 0.001695543 | 18.22470184 |
| RGS2         | NM_002923    | 254.4923715 | 15.31160148 | 1.16E-20    | 16.62088527 |
| CWF19L1      | NM_018294    | 132.2505893 | 11.33415291 | 6.16E-10    | 11.66832584 |
| WDR45B       | NM_019613    | 131.2176143 | 12.89908692 | 3.34E-09    | 10.17262812 |
| EHD2         | NM_014601    | 162.9890429 | 13.24186361 | 3.29E-12    | 12.30861816 |
| STX11        | NM_003764    | 63.70332862 | 3.093732841 | 6.82E-06    | 20.59108912 |
| CCDC137      | NM_199287    | 285.3912966 | 27.99300954 | 2.66E-19    | 10.1950916  |
| TRIM25       | NM_005082    | 290.0747572 | 14.79626251 | 3.59E-24    | 19.60459656 |
| TBL3         | NM_006453    | 70.61321075 | 17.48181977 | 0.002235799 | 4.039236858 |
| MZT2B        | NM_025029    | 149.0088072 | 15.20218958 | 2.08E-10    | 9.801799035 |
| TBL2         | NM_012453    | 202.7033286 | 15.07454913 | 2.88E-15    | 13.4467258  |
| KLHL20       | NM_014458    | 171.0923715 | 4.522566019 | 7.68E-16    | 37.83081791 |
| VASN         | NM_138440    | 154.1736822 | 19.80123632 | 8.00E-10    | 7.786063443 |
| KIAA1919     | NM_153369    | 189.7560679 | 8.040396054 | 2.46E-17    | 23.60033842 |
| PPID         | NM_005038    | 156.0791608 | 6.369837492 | 4.28E-14    | 24.50284814 |
| PKP3         | NM_007183    | 102.5451108 | 8.905146082 | 5.83E-08    | 11.5152643  |
| WWTR1        | NM_015472    | 107.5495144 | 5.326415521 | 3.51E-09    | 20.19172443 |
| RPRD1A       | NM_018170    | 118.5912966 | 6.423527863 | 2.17E-10    | 18.46201948 |
| HEATR1       | NM_018072    | 71.64618576 | 5.595414826 | 9.63E-06    | 12.80444578 |
| FAM216A      | NM_013300    | 69.74070721 | 9.4826303   | 0.000257222 | 7.354574101 |
| SLC35F2      | NM_017515    | 97.38023574 | 6.227586428 | 3.50E-08    | 15.63691438 |
| AK1          | NM_000476    | 85.46595002 | 15.97460314 | 7.69E-05    | 5.350114132 |
| RAB20        | NM_017817    | 170.9319    | 7.853676077 | 6.42E-15    | 21.76457221 |
| RBM22        | NM_018047    | 125.1802357 | 10.18725922 | 1.31E-09    | 12.28792093 |
| NR4A2        | NM_006186    | 199.9253465 | 13.06022292 | 2.65E-16    | 15.3079582  |
| CLGN         | NM_004362    | 144.3253465 | 1.792946788 | 3.53E-16    | 80.4961684  |
| ESPL1        | NM_012291    | 100.6396323 | 11.25871127 | 4.36E-07    | 8.938823445 |
| UFC1         | NM_016406    | 113.26595   | 22.91997797 | 1.03E-05    | 4.941800126 |
| PER2         | NM_022817    | 52.66154644 | 6.700456695 | 0.000705496 | 7.859396581 |
| DOCK5        | NM_024940    | 95.47475719 | 5.360212675 | 9.27E-08    | 17.81174796 |
| KLHDC8B      | NM_173546    | 52.82201792 | 8.013506893 | 0.003034911 | 6.591623196 |
| AICDA        | NM_020661    | 33.8373786  | 2.859151898 | 0.003155268 | 11.83476073 |
| PEX6         | NM_000287    | 120.3363036 | 18.24228671 | 3.73E-07    | 6.596558071 |
| ZNF614       | NM_025040    | 114.298925  | 1.905511081 | 1.10E-12    | 59.98334314 |
| RNF223       | NM_001205252 | 124.3077322 | 12.76429571 | 2.08E-08    | 9.738706701 |
| MALT1        | NM_173844    | 96.34726073 | 4.503146258 | 3.15E-08    | 21.3955433  |
| FAM162A      | NM_014367    | 205.8022537 | 5.818824394 | 1.25E-19    | 35.36835617 |
| SUDS3        | NM_022491    | 54.72749646 | 5.535779274 | 0.00036355  | 9.886141364 |
| TUSC2        | NM_007275    | 155.2066572 | 20.63416893 | 3.29E-09    | 7.5218274   |
| CDC73        | NM_024529    | 205.8022537 | 5.544531326 | 1.03E-18    | 37.1180613  |
| ERO1LB       | NM_019891    | 151.2352287 | 2.847311346 | 2.46E-15    | 53.11510062 |
| COG2         | NM_007357    | 127.2461858 | 5.409013124 | 1.69E-11    | 23.52484323 |
| CCDC57       | NM_198082    | 169.0264215 | 14.73758413 | 3.11E-12    | 11.46907254 |
| BIK          | NM_001197    | 174.7428571 | 17.49146236 | 4.97E-12    | 9.990179983 |
| DDRGK1       | NM_023935    | 262.4352287 | 15.70195752 | 1.09E-20    | 16.71353577 |
| CHD9         | NM_025134    | 89.4373786  | 3.770623359 | 3.93E-08    | 23.71952064 |
| ZNF197-AS1   | NR_046658    | 61.6373786  | 6.596276347 | 8.31E-05    | 9.344268699 |

|              |              |             |             |             |             |
|--------------|--------------|-------------|-------------|-------------|-------------|
| GIN54        | NM_032336    | 266.2461858 | 13.91618394 | 7.82E-22    | 19.13212609 |
| OSGIN1       | NM_182981    | 313.1912966 | 19.09842017 | 4.36E-25    | 16.39880649 |
| STAG3L2      | NR_040584    | 214.6176143 | 9.442216125 | 1.63E-19    | 22.7295808  |
| SELT         | NM_016275    | 229.6308251 | 6.379929921 | 6.20E-22    | 35.99268769 |
| CC2D1A       | NM_017721    | 73.55166431 | 7.460034837 | 1.95E-05    | 9.859426386 |
| SRFBP1       | NM_152546    | 89.4373786  | 1.624497574 | 8.81E-09    | 55.05540914 |
| RWDD4        | NM_152682    | 70.61321075 | 2.261814348 | 1.99E-07    | 31.21972005 |
| PTPN9        | NM_002833    | 78.71653937 | 5.479557278 | 1.81E-06    | 14.36549257 |
| MRPS9        | NM_182640    | 113.26595   | 2.874263236 | 2.69E-11    | 39.40695084 |
| CDKL2        | NM_003948    | 64.57583215 | 2.834121077 | 3.84E-06    | 22.78513529 |
| NUCB2        | NM_005013    | 37.09677511 | 2.36077761  | 0.002889673 | 15.71379488 |
| GRB2         | NM_002086    | 266.4066572 | 12.62503619 | 2.59E-21    | 21.10145692 |
| AP3S1        | NM_001284    | 154.1736822 | 3.153087797 | 1.82E-15    | 48.89609556 |
| TOR4A        | NM_017723    | 122.4022537 | 13.15297063 | 1.11E-08    | 9.306053904 |
| FBXL14       | NM_152441    | 47.81761433 | 7.660850949 | 0.004163617 | 6.241814996 |
| WBSR27       | NM_152559    | 304.9274965 | 11.54554793 | 6.46E-28    | 26.41082939 |
| ZCCHC8       | NM_017612    | 152.1077322 | 7.993447419 | 4.51E-13    | 19.0290527  |
| RTN4RL2      | NM_178570    | 48.69011787 | 8.219177918 | 0.003736703 | 5.923964459 |
| POFUT1       | NM_172236    | 183.8791608 | 9.619059152 | 3.78E-16    | 19.11612746 |
| KPNA2        | NM_002266    | 242.7385573 | 27.03933834 | 1.70E-15    | 8.977237322 |
| ANO5         | NM_001142649 | 38.84178218 | 1.028931372 | 0.000175109 | 37.74963348 |
| LOC646719    | NR_046262    | 227.5648751 | 12.05904856 | 9.28E-20    | 18.87088138 |
| TMEM184C     | NM_018241    | 252.4264215 | 5.131608642 | 1.52E-26    | 49.19050519 |
| NDUFA6       | NM_002490    | 87.53190005 | 20.64562233 | 0.000524995 | 4.239731728 |
| LOC101928002 | NR_110072    | 89.4373786  | 3.203910024 | 4.63E-08    | 27.91507187 |
| BAIAP2L1     | NM_018842    | 67.67475719 | 8.545023271 | 0.000101898 | 7.919786178 |
| CHURC1-FNTB  | NM_001202559 | 121.3692786 | 9.583851852 | 2.42E-09    | 12.66393518 |
| TUBB6        | NM_032525    | 95.47475719 | 13.98720932 | 5.38E-06    | 6.825861757 |
| RBM42        | NM_024321    | 92.53630363 | 14.55930245 | 1.76E-05    | 6.35581986  |
| NOP56        | NR_027700    | 251.3934465 | 45.90336995 | 2.36E-12    | 5.476579318 |
| RUVBL1       | NM_003707    | 131.2176143 | 8.76277154  | 9.51E-11    | 14.97444202 |
| BNIP3        | NM_004052    | 94.44178218 | 9.948777485 | 7.98E-07    | 9.492802741 |
| PROSER1      | NM_025138    | 100.4791608 | 5.182597491 | 6.78E-09    | 19.38779945 |
| SUGT1P1      | NR_003667    | 71.64618576 | 1.354356577 | 2.83E-08    | 52.90053372 |
| MSH2         | NM_001258281 | 129.3121358 | 4.979402537 | 2.54E-11    | 25.96940794 |
| HADHA        | NM_000182    | 146.2308251 | 7.358693232 | 3.97E-12    | 19.87184687 |
| ENO2         | NM_001975    | 80.46154644 | 9.636011785 | 1.17E-05    | 8.350088007 |
| TOPBP1       | NM_007027    | 76.65058935 | 3.451979733 | 3.02E-07    | 22.20482021 |
| TFAP2C       | NM_003222    | 221.5274965 | 10.90054176 | 1.06E-19    | 20.32261344 |
| EAF2         | NM_018456    | 156.9516643 | 2.213050371 | 1.04E-16    | 70.92096336 |
| CPOX         | NM_000097    | 181.9736822 | 12.68422518 | 3.01E-14    | 14.34645629 |
| C16orf58     | NM_022744    | 123.2747572 | 10.9480853  | 9.43E-09    | 11.25993759 |
| CRTC2        | NM_181715    | 124.1472607 | 15.27571842 | 1.10E-07    | 8.127098008 |
| XPO4         | NM_022459    | 90.47035361 | 3.328469089 | 1.52E-08    | 27.18077026 |
| LINC01425    | NR_109958    | 25.89452145 | 0.313205271 | 0.003282503 | 82.67588028 |
| C1QBP        | NM_001212    | 114.4593965 | 15.01448025 | 2.60E-07    | 7.623267312 |
| SPTLC2       | NM_004863    | 109.2945215 | 3.997114729 | 2.70E-09    | 27.34335361 |
| DHRS11       | NM_024308    | 98.41321075 | 16.87284576 | 2.06E-05    | 5.832638559 |
| NIPAL2       | NM_024759    | 47.10558227 | 5.903038633 | 0.002471669 | 7.979887174 |
| OSTM1        | NM_014028    | 195.7934465 | 5.985927133 | 3.73E-18    | 32.70895922 |
| SMG1P3       | NR_027155    | 272.2835644 | 3.276957301 | 7.29E-28    | 83.09036077 |
| MED19        | NM_153450    | 152.2682037 | 16.00042776 | 4.56E-10    | 9.516508305 |
| USPL1        | NM_005800    | 116.5253465 | 6.640448596 | 1.80E-09    | 17.54781245 |
| CCDC174      | NM_016474    | 145.0373786 | 7.862956009 | 5.61E-12    | 18.44565561 |
| XRCC2        | NM_005431    | 113.26595   | 8.435345037 | 3.08E-09    | 13.42754203 |
| PRDX2        | NM_005809    | 221.5274965 | 26.67018403 | 7.12E-14    | 8.306185521 |
| ABCA1        | NM_005502    | 54.72749646 | 5.703556434 | 0.000444939 | 9.5953283   |
| ADM          | NM_001124    | 288.0088072 | 40.37591942 | 2.00E-15    | 7.133182632 |
| TPA          | NM_000370    | 66.64178218 | 4.145063856 | 1.98E-05    | 16.07738373 |
| FRY          | NM_023037    | 47.97808581 | 3.492442205 | 0.000300774 | 13.73768927 |
| TPCN2        | NM_139075    | 106.3560679 | 7.069023764 | 2.53E-08    | 15.04536856 |
| COTL1        | NM_021149    | 73.71213579 | 17.87747125 | 0.001014672 | 4.123185811 |

|                |              |             |             |             |             |
|----------------|--------------|-------------|-------------|-------------|-------------|
| TMEM43         | NM_024334    | 130.1846393 | 17.59410791 | 4.25E-08    | 7.399331639 |
| ZZEF1          | NM_015113    | 65.76927864 | 7.250072555 | 0.000181475 | 9.071533856 |
| LOC101929431   | NR_120660    | 134.3165394 | 6.112400483 | 1.17E-12    | 21.97443374 |
| NOMO3          | NM_001004067 | 130.3451108 | 7.557779419 | 1.17E-10    | 17.24648254 |
| TMEM42         | NM_144638    | 159.0176143 | 13.20821865 | 3.82E-12    | 12.039293   |
| EEF1E1-BLOC1S5 | NR_037618    | 146.0703536 | 5.134572178 | 5.52E-13    | 28.44839814 |
| HOXA9          | NM_152739    | 174.0308251 | 24.40602216 | 3.73E-10    | 7.13065095  |
| ZNF75A         | NM_153028    | 127.2461858 | 12.50250872 | 1.77E-09    | 10.17765223 |
| FAM76B         | NM_144664    | 114.298925  | 3.598423172 | 4.14E-11    | 31.76361411 |
| MAF1           | NM_032272    | 142.2593965 | 15.20201082 | 1.20E-09    | 9.357932855 |
| SFT2D1         | NM_145169    | 91.50332862 | 6.809358983 | 3.50E-07    | 13.43787702 |
| HDAC3          | NM_003883    | 91.50332862 | 8.361349305 | 1.42E-06    | 10.94360794 |
| CHST2          | NM_004267    | 65.60880717 | 4.314992114 | 6.22E-06    | 15.20484984 |
| HMGNA4         | NM_006353    | 129.1516643 | 5.402737778 | 7.19E-12    | 23.90485521 |
| PCGF3          | NM_006315    | 107.3890429 | 11.96205203 | 1.19E-07    | 8.977476657 |
| DDX24          | NM_020414    | 228.4373786 | 10.30933524 | 7.38E-20    | 22.15830346 |
| IER3IP1        | NM_016097    | 151.0747572 | 8.063152846 | 1.58E-12    | 18.73643723 |
| SMYD2          | NM_020197    | 116.2044036 | 6.129242116 | 3.09E-10    | 18.95901669 |
| NPHP3          | NM_153240    | 58.69892504 | 4.920822025 | 0.000102141 | 11.9286828  |
| CALR           | NM_004343    | 268.1516643 | 19.40226772 | 1.94E-20    | 13.8206352  |
| PLD6           | NM_178836    | 66.64178218 | 12.02857338 | 0.000642119 | 5.540289783 |
| MET            | NM_000245    | 46.78463932 | 5.547392775 | 0.002495399 | 8.43362661  |
| ZNF396         | NM_145756    | 101.3516643 | 10.47599569 | 6.51E-07    | 9.674656935 |
| RPS3A          | NM_001267699 | 155.0461858 | 25.42069228 | 1.98E-08    | 6.099211779 |
| PRH1-PRR4      | NR_037918    | 177.8417822 | 3.330049654 | 6.97E-17    | 53.40514427 |
| LOC389831      | NM_001242480 | 366.7253465 | 20.01434161 | 2.22E-28    | 18.32312817 |
| MOAP1          | NM_022151    | 257.2703536 | 12.73578857 | 6.08E-22    | 20.20058296 |
| SUGTIP3        | NR_003365    | 98.57368223 | 0.274668031 | 9.66E-16    | 358.882983  |
| DUSP11         | NM_003584    | 185.7846393 | 5.14122512  | 2.22E-18    | 36.13625838 |
| SLC25A33       | NM_032315    | 61.6373786  | 8.638336615 | 0.000277706 | 7.13532956  |
| SCAND2P        | NR_003654    | 147.1033286 | 17.34980723 | 3.58E-09    | 8.478672221 |
| PCSK7          | NM_004716    | 106.3560679 | 12.81988249 | 6.27E-07    | 8.296181184 |
| LSG1           | NM_018385    | 52.82201792 | 7.204612051 | 0.002409122 | 7.331694967 |
| FOSB           | NM_001114171 | 150.0417822 | 22.32617271 | 8.52E-09    | 6.720443496 |
| LAPTM4A        | NM_014713    | 142.098925  | 7.254059503 | 1.09E-12    | 19.5888833  |
| SLC35F6        | NM_017877    | 110.4879679 | 16.1641348  | 6.00E-07    | 6.835377785 |
| TTBK2          | NM_173500    | 115.4923715 | 3.965815839 | 9.77E-11    | 29.12197041 |
| ZNF280C        | NM_017666    | 119.3033286 | 2.148889429 | 4.16E-12    | 55.51859813 |
| AHR            | NM_001621    | 250.3604715 | 2.617987516 | 1.14E-26    | 95.63088822 |
| DKFZP434I0714  | NR_033797    | 137.2549929 | 15.10163769 | 4.00E-09    | 9.088748897 |
| LOC100379224   | NR_033341    | 48.85058935 | 7.143045509 | 0.002448557 | 6.838902158 |
| FBXO46         | NM_001080469 | 124.3077322 | 10.91079223 | 5.46E-09    | 11.39309865 |
| CA8            | NM_004056    | 174.9033286 | 3.988799074 | 4.99E-16    | 43.84861843 |
| OSBPL7         | NM_145798    | 178.0022537 | 11.21423524 | 1.44E-14    | 15.87288387 |
| CTSD           | NM_001909    | 54.72749646 | 11.22334968 | 0.00345568  | 4.876217707 |
| PYURF          | NM_032906    | 281.2593965 | 18.62316196 | 3.18E-21    | 15.10266608 |
| THOC3          | NM_032361    | 216.6835644 | 7.967242941 | 2.51E-20    | 27.19680647 |
| LINC00898      | NR_033377    | 64.57583215 | 4.881404677 | 8.62E-06    | 13.22894462 |
| FAM102A        | NM_001035254 | 74.7451108  | 14.33476031 | 0.000351249 | 5.21425606  |
| OXSR1          | NM_005109    | 181.8132108 | 6.1038167   | 1.27E-16    | 29.78680712 |
| RBM33          | NM_053043    | 58.69892504 | 5.827697061 | 0.000135964 | 10.072405   |
| H3F3B          | NM_005324    | 391.586893  | 76.34615856 | 4.78E-17    | 5.129097526 |
| APPL1          | NM_012096    | 172.9978501 | 4.283933496 | 1.06E-16    | 40.38294484 |
| TYMSOS         | NM_001012716 | 213.5846393 | 17.17699411 | 9.32E-16    | 12.43434316 |
| RPL11          | NM_000975    | 132.2505893 | 14.93207669 | 6.80E-09    | 8.856811555 |
| HES1           | NM_005524    | 105.3230929 | 24.24073854 | 0.000103309 | 4.344879703 |
| MAGEE1         | NM_020932    | 55.6        | 6.075574646 | 0.00083753  | 9.151397726 |
| ARSJ           | NM_024590    | 72.5186893  | 2.420148637 | 1.12E-06    | 29.96456011 |
| POLA1          | NM_016937    | 91.34285714 | 2.944652324 | 1.99E-08    | 31.0199124  |
| GPR157         | NM_024980    | 51.62857143 | 9.18414959  | 0.002407026 | 5.621486336 |
| FAM188B        | NM_032222    | 130.1846393 | 7.42140329  | 1.77E-10    | 17.54178209 |
| DECR1          | NM_001359    | 143.1319    | 5.471005152 | 5.48E-13    | 26.16190189 |

|              |              |             |             |             |             |
|--------------|--------------|-------------|-------------|-------------|-------------|
| RNPC3        | NM_017619    | 100.4791608 | 2.198648757 | 1.39E-10    | 45.70041507 |
| RNMTL1       | NM_018146    | 152.9802357 | 12.9776257  | 1.17E-11    | 11.78799876 |
| CCDC122      | NM_144974    | 94.44178218 | 2.588152523 | 2.09E-09    | 36.49003732 |
| TMTC3        | NM_181783    | 129.3121358 | 2.01290315  | 2.59E-13    | 64.24160835 |
| SPDL1        | NM_017785    | 122.2417822 | 4.765580929 | 9.35E-12    | 25.65097183 |
| USP45        | NM_001080481 | 253.298925  | 4.131526215 | 1.68E-24    | 61.30880257 |
| TNFRSF10A    | NM_003844    | 145.1978501 | 8.414902062 | 2.47E-12    | 17.25484729 |
| SMKR1        | NM_001195243 | 67.67475719 | 7.320643332 | 3.39E-05    | 9.244372949 |
| VPS4A        | NM_013245    | 80.62201792 | 16.94539941 | 0.000265212 | 4.757752588 |
| EHD4         | NM_139265    | 231.5363036 | 7.38319698  | 1.92E-20    | 31.35989792 |
| FRG1B        | NR_003579    | 163.3099859 | 2.92333325  | 2.10E-17    | 55.86430691 |
| B4GALT7      | NM_007255    | 129.3121358 | 29.19958403 | 5.51E-06    | 4.428560889 |
| LRRC58       | NM_001099678 | 260.3692786 | 4.608766443 | 6.60E-27    | 56.49435307 |
| BFAR         | NM_016561    | 81.65499293 | 12.78076115 | 6.75E-05    | 6.38889906  |
| SNX27        | NM_030918    | 95.47475719 | 4.111832928 | 6.09E-08    | 23.21951277 |
| APLF         | NM_173545    | 155.9186893 | 2.098040723 | 9.68E-16    | 74.31633121 |
| TXNDC17      | NM_032731    | 164.0220179 | 33.14675843 | 1.89E-07    | 4.948357718 |
| SARS         | NR_034072    | 190.0770108 | 15.85719418 | 2.35E-14    | 11.98679973 |
| DKK1         | NM_012242    | 370.5363036 | 29.73544786 | 4.52E-26    | 12.46109712 |
| ITFG2        | NM_018463    | 217.7165394 | 9.801425254 | 1.39E-19    | 22.21274291 |
| C14orf142    | NM_032490    | 188.0110608 | 8.614168531 | 2.78E-17    | 21.82579318 |
| TUBB2A       | NM_001069    | 157.9846393 | 23.96691468 | 1.53E-08    | 6.591780438 |
| MAP3K14      | NM_003954    | 94.44178218 | 11.61414907 | 2.11E-06    | 8.131614433 |
| ROR2         | NM_004560    | 103.4176143 | 5.59928162  | 1.43E-08    | 18.46980048 |
| IFT57        | NM_018010    | 71.64618576 | 3.153546542 | 1.13E-06    | 22.71924159 |
| LOC389247    | NR_033995    | 51.62857143 | 0.517002028 | 1.04E-06    | 99.86144866 |
| SIX5         | NM_175875    | 185.7846393 | 20.04578274 | 5.16E-12    | 9.268016205 |
| PAK1IP1      | NM_017906    | 109.2945215 | 5.41301094  | 1.68E-09    | 20.19107714 |
| TOE1         | NM_025077    | 251.3934465 | 45.53761701 | 5.26E-12    | 5.520566577 |
| ATP6V1B2     | NM_001693    | 188.8835644 | 8.052081344 | 2.56E-16    | 23.45773177 |
| LOC100288748 | NR_034034    | 212.0001037 | 41.92352423 | 3.66E-09    | 5.056829253 |
| CCDC109B     | NM_017918    | 60.76487506 | 3.88998816  | 2.23E-05    | 15.62083805 |
| COX6A1       | NM_004373    | 181.9736822 | 17.61319627 | 3.27E-12    | 10.3316672  |
| ARHGAP18     | NM_033515    | 164.8945215 | 4.104366658 | 6.63E-15    | 40.17538763 |
| MYH7B        | NM_020884    | 171.9648751 | 16.28776772 | 5.56E-12    | 10.55791548 |
| C6orf57      | NM_145267    | 224.6264215 | 4.104434797 | 2.11E-23    | 54.72773539 |
| TRUB2        | NM_015679    | 146.0703536 | 12.33760668 | 1.55E-10    | 11.83943997 |
| ZBTB25       | NM_006977    | 131.3780858 | 9.782006077 | 1.77E-10    | 13.43058722 |
| TMEM261      | NM_033428    | 121.2088072 | 8.651565024 | 1.19E-09    | 14.01004406 |
| C11orf1      | NM_022761    | 72.67916077 | 16.89926775 | 0.001731385 | 4.300728402 |
| KLHL26       | NM_018316    | 57.66595002 | 9.480797302 | 0.000837264 | 6.082394569 |
| ATG2A        | NM_015104    | 214.7780858 | 10.04399194 | 5.73E-18    | 21.38373738 |
| FAHD2CP      | NR_003698    | 256.3978501 | 14.45299924 | 2.19E-21    | 17.74011371 |
| FMNL2        | NM_052905    | 133.2835644 | 5.507502737 | 1.58E-11    | 24.2003628  |
| ALG10B       | NM_001013620 | 167.9934465 | 2.300367801 | 2.19E-20    | 73.02895061 |
| C6orf147     | NR_027005    | 199.7648751 | 10.71419046 | 1.09E-16    | 18.64488743 |
| DYRK3        | NM_003582    | 216.5230929 | 7.023625235 | 3.86E-21    | 30.82782546 |
| LDLRAP1      | NM_015627    | 107.3890429 | 11.72735071 | 3.06E-07    | 9.157144318 |
| ABHD13       | NM_032859    | 182.8461858 | 2.087094308 | 3.72E-22    | 87.60801323 |
| TMEM38B      | NM_018112    | 155.0461858 | 1.812868067 | 5.76E-16    | 85.52535541 |
| IFT52        | NM_016004    | 100.4791608 | 6.607586792 | 1.06E-07    | 15.20663503 |
| IDII         | NM_004508    | 140.1934465 | 17.32227909 | 8.38E-09    | 8.093244878 |
| IFNGR1       | NM_000416    | 199.9253465 | 4.378310584 | 5.20E-20    | 45.6626689  |
| KIF18A       | NM_031217    | 89.59785007 | 2.332486311 | 1.86E-08    | 38.4130229  |
| THAP2        | NM_031435    | 129.1516643 | 7.381013884 | 2.89E-11    | 17.49782162 |
| BSN-AS2      | NR_038866    | 81.65499293 | 11.23307333 | 3.82E-05    | 7.269158719 |
| HDHD2        | NM_032124    | 238.4461858 | 4.855743261 | 1.36E-23    | 49.10601178 |
| FAM86DP      | NR_024241    | 114.298925  | 5.476220728 | 3.11E-10    | 20.87186231 |
| PSMA2        | NM_002787    | 95.47475719 | 6.493567066 | 9.96E-08    | 14.70297545 |
| GPR89B       | NM_016334    | 268.3121358 | 4.006137475 | 1.34E-26    | 66.97526919 |
| ARL2-SNX15   | NR_037650    | 122.2417822 | 13.01055717 | 1.68E-08    | 9.395583953 |
| SMG7-AS1     | NR_040063    | 142.2593965 | 10.67323923 | 2.65E-11    | 13.32860563 |

|              |              |             |             |             |             |
|--------------|--------------|-------------|-------------|-------------|-------------|
| GMPS         | NM_003875    | 144.0044036 | 4.218741504 | 5.71E-13    | 34.13444589 |
| PRR34-AS1    | NR_027034    | 98.41321075 | 13.43801851 | 5.60E-06    | 7.323491236 |
| BMS1P20      | NR_027293    | 79.5890429  | 6.99091425  | 5.32E-06    | 11.38464013 |
| IRF1         | NM_002198    | 343.6088072 | 14.04952468 | 6.79E-31    | 24.45697024 |
| TMEM144      | NM_018342    | 63.70332862 | 4.302544909 | 5.30E-05    | 14.80596483 |
| NIPAL1       | NM_207330    | 242.5780858 | 5.349010438 | 6.06E-25    | 45.35008645 |
| UCK2         | NM_012474    | 140.032975  | 7.709017103 | 2.26E-11    | 18.16482869 |
| TOX4         | NM_014828    | 115.3319    | 8.27830409  | 2.04E-09    | 13.93182695 |
| SPTY2D1      | NM_194285    | 111.3604715 | 7.683252691 | 4.98E-09    | 14.49392282 |
| MTCP1        | NM_001018025 | 59.57142857 | 4.592783608 | 9.70E-05    | 12.97065868 |
| NEU3         | NM_006656    | 182.8461858 | 9.733692117 | 5.53E-15    | 18.78487459 |
| SQLE         | NM_003129    | 106.6770108 | 5.989956073 | 1.09E-08    | 17.80931438 |
| RBM48        | NM_032120    | 58.85939651 | 2.759908033 | 1.15E-05    | 21.32657894 |
| ERH          | NM_004450    | 161.2440358 | 6.100923727 | 5.77E-15    | 26.42944627 |
| ULK4         | NM_017886    | 37.96927864 | 3.049816237 | 0.00361418  | 12.44969391 |
| HNRNPA0      | NM_006805    | 217.5560679 | 21.79528793 | 3.80E-14    | 9.981793706 |
| PAPSS1       | NM_005443    | 168.86595   | 4.574957563 | 2.97E-15    | 36.91093255 |
| TMSB4X       | NM_021109    | 147.1033286 | 18.68261887 | 2.13E-08    | 7.873806647 |
| ATP6AP1      | NM_001183    | 133.2835644 | 7.100266507 | 3.01E-12    | 18.77162839 |
| MED28        | NM_025205    | 214.6176143 | 9.617549343 | 4.45E-19    | 22.31520803 |
| CDK8         | NM_001260    | 41.78023574 | 1.671914729 | 0.000918299 | 24.98945372 |
| HOOK3        | NM_032410    | 142.9714286 | 4.097368386 | 1.29E-12    | 34.89347676 |
| DDX50        | NM_024045    | 187.8505893 | 5.393835253 | 5.81E-18    | 34.82690526 |
| ARPP19       | NM_006628    | 170.9319    | 4.131047885 | 9.82E-18    | 41.37737078 |
| RNF123       | NM_022064    | 159.8901179 | 21.41304496 | 9.40E-10    | 7.466949149 |
| GAS2L3       | NM_174942    | 185.9451108 | 2.490788308 | 6.74E-20    | 74.65311692 |
| FLJ36777     | NR_027441    | 208.5802357 | 19.91728796 | 2.15E-14    | 10.47232114 |
| SPPL2A       | NM_032802    | 252.26595   | 3.533521135 | 3.01E-25    | 71.39222898 |
| ATP6V0E1     | NM_003945    | 132.4110608 | 8.239774103 | 1.06E-10    | 16.06974405 |
| ISY1-RAB43   | NM_001204890 | 47.81761433 | 8.210549459 | 0.004726061 | 5.823923791 |
| RNASEH2A     | NM_006397    | 169.0264215 | 18.73219248 | 3.02E-11    | 9.02331223  |
| THBS1        | NM_003246    | 230.5033286 | 8.200789839 | 5.83E-21    | 28.10745466 |
| LOC102546294 | NR_105057    | 37.96927864 | 1.495537669 | 0.003062328 | 25.38838    |
| ZNF572       | NM_152412    | 247.4220179 | 15.09508381 | 3.07E-20    | 16.39090057 |
| TRIP11       | NM_004239    | 120.1758322 | 5.364024566 | 1.78E-10    | 22.40404209 |
| PGGT1B       | NM_005023    | 142.098925  | 2.036994862 | 4.05E-15    | 69.75909842 |
| MCOLN2       | NM_153259    | 103.4176143 | 4.350454786 | 7.76E-09    | 23.77167892 |
| C19orf43     | NM_024038    | 214.6176143 | 18.71466265 | 1.50E-15    | 11.46788582 |
| ZMAT2        | NM_144723    | 72.67916077 | 15.89915528 | 0.002004574 | 4.571259259 |
| PDAP1        | NM_014891    | 152.1077322 | 23.88339677 | 9.04E-09    | 6.368764615 |
| RPL23AP53    | NR_003572    | 118.2703536 | 4.951337803 | 6.25E-11    | 23.88654507 |
| ST7-OT4      | NR_002329    | 30.0264215  | 0.383284482 | 0.000463213 | 78.3397788  |
| TEFM         | NM_024683    | 176.0967751 | 10.10266791 | 2.67E-15    | 17.43071996 |
| VPS25        | NM_032353    | 188.0110608 | 20.98938593 | 3.80E-12    | 8.957435033 |
| THAP6        | NM_144721    | 175.0638001 | 3.930437803 | 5.43E-18    | 44.54053438 |
| FADD         | NM_003824    | 133.2835644 | 29.10738264 | 3.67E-06    | 4.579029521 |
| RAB40B       | NM_006822    | 65.60880717 | 7.436881019 | 0.000148265 | 8.822086436 |
| RPS8         | NM_001012    | 253.4593965 | 32.1383824  | 8.92E-15    | 7.88650136  |
| USP35        | NM_020798    | 47.81761433 | 8.423622803 | 0.004170074 | 5.676609156 |
| ZNF720       | NM_001130913 | 195.632975  | 5.686128487 | 2.00E-18    | 34.40530327 |
| VEZF1        | NM_007146    | 51.62857143 | 7.292809587 | 0.002006944 | 7.079380151 |
| KLC3         | NM_177417    | 133.2835644 | 23.71127844 | 5.97E-07    | 5.621104096 |
| WDR61        | NM_025234    | 141.06595   | 11.52704906 | 1.63E-10    | 12.23781987 |
| KIAA1279     | NM_015634    | 120.4967751 | 6.162708679 | 4.87E-10    | 19.55256712 |
| IK           | NM_006083    | 79.5890429  | 5.691203993 | 2.51E-06    | 13.9845704  |
| BOP1         | NM_015201    | 49.72309288 | 9.300362963 | 0.004328481 | 5.346360467 |
| KIAA1328     | NM_020776    | 121.3692786 | 1.951996624 | 2.77E-11    | 62.17699209 |
| SETD2        | NM_014159    | 45.75166431 | 3.917205661 | 0.000542755 | 11.67966869 |
| TEN1         | NM_001113324 | 119.4638001 | 18.52413311 | 4.93E-07    | 6.44908992  |
| APOBEC3C     | NM_014508    | 126.3736822 | 12.8967477  | 1.66E-08    | 9.798879929 |
| NRBP1        | NM_013392    | 257.2703536 | 17.43404543 | 5.50E-20    | 14.75677889 |
| GTPBP4       | NM_012341    | 108.4220179 | 8.481798895 | 1.12E-08    | 12.78290363 |

|              |              |             |             |             |             |
|--------------|--------------|-------------|-------------|-------------|-------------|
| SLC45A1      | NM_001080397 | 127.2461858 | 8.56423726  | 5.81E-10    | 14.85785388 |
| LOC101926913 | NR_110185    | 97.38023574 | 6.494431982 | 3.62E-08    | 14.99441922 |
| CDK17        | NM_002595    | 107.3890429 | 3.670012759 | 2.88E-10    | 29.26121787 |
| TXNDC15      | NM_024715    | 56.79344649 | 10.3315211  | 0.002540298 | 5.497104049 |
| INTU         | NM_015693    | 52.82201792 | 2.157315376 | 0.000122168 | 24.48506996 |
| APOE         | NM_000041    | 75.61761433 | 10.55575624 | 0.000141332 | 7.163637792 |
| IPO13        | NM_014652    | 160.0505893 | 14.02699088 | 2.03E-11    | 11.41018702 |
| TUBG2        | NM_016437    | 263.4682037 | 17.69265157 | 1.51E-20    | 14.89139164 |
| SLC16A9      | NM_194298    | 83.56047148 | 3.615542604 | 7.71E-08    | 23.11146089 |
| LRRRC40      | NM_017768    | 125.1802357 | 3.061667999 | 1.63E-12    | 40.88628676 |
| CRISPLD2     | NM_031476    | 330.9824894 | 12.98411337 | 1.72E-27    | 25.49134314 |
| CHST3        | NM_004273    | 54.88796794 | 10.13338039 | 0.004629797 | 5.416550632 |
| NTSR1        | NM_002531    | 138.1274965 | 26.96896697 | 9.82E-07    | 5.121719962 |
| KCNQ1OT1     | NR_002728    | 157.9846393 | 6.580996608 | 4.68E-13    | 24.00618762 |
| HIST2H2BC    | NR_036461    | 125.1802357 | 28.59296713 | 0.004717065 | 4.378007892 |
| NAGLU        | NM_000263    | 92.53630363 | 15.03725858 | 1.81E-05    | 6.15380145  |
| EGFEM1P      | NR_021485    | 44.87916077 | 0.487879315 | 5.87E-05    | 91.98824248 |
| KDM5A        | NM_001042603 | 158.1451108 | 6.199680313 | 5.83E-14    | 25.50859122 |
| TSTA3        | NM_003313    | 253.4593965 | 25.78535134 | 1.04E-16    | 9.829588636 |
| PHF13        | NM_153812    | 101.3516643 | 13.9557834  | 3.40E-06    | 7.262341452 |
| RRP7B        | NR_002184    | 112.3934465 | 15.86088353 | 9.55E-07    | 7.086203379 |
| RANBP17      | NM_022897    | 68.7077322  | 2.124949864 | 3.56E-06    | 32.33381332 |
| CEP250       | NM_007186    | 200.7978501 | 7.786286684 | 1.70E-17    | 25.78865359 |
| PTGS2        | NM_000963    | 75.77808581 | 3.849510111 | 1.60E-07    | 19.6851245  |
| PHKA2        | NM_000292    | 101.3516643 | 3.325772865 | 1.66E-09    | 30.47462002 |
| RPL18A       | NM_000980    | 201.8308251 | 33.73201971 | 2.70E-10    | 5.983360227 |
| RBM3         | NM_006743    | 73.55166431 | 13.70891261 | 0.000438104 | 5.36524423  |
| LOC101927211 | NR_110742    | 77.52309288 | 3.927241625 | 2.30E-06    | 19.73983276 |
| RECK         | NM_021111    | 196.8264215 | 4.355507911 | 2.32E-18    | 45.19023396 |
| CXCL2        | NM_002089    | 86.49892504 | 13.20759976 | 0.000125975 | 6.549178245 |
| CEP83-AS1    | NR_027035    | 212.7121358 | 10.74107345 | 4.54E-18    | 19.8036199  |
| ZMPSTE24     | NM_005857    | 138.1274965 | 7.684244512 | 1.77E-11    | 17.97541661 |
| ATAD5        | NM_024857    | 144.0044036 | 6.709066254 | 8.22E-12    | 21.46414987 |
| EFCAB7       | NM_032437    | 199.7648751 | 2.300954089 | 7.01E-22    | 86.81827943 |
| L3MBTL2      | NM_031488    | 106.5165394 | 10.61717033 | 1.23E-07    | 10.03247909 |
| LINC00662    | NR_027301    | 145.1978501 | 18.11935617 | 5.54E-09    | 8.013411112 |
| SP140L       | NM_138402    | 72.67916077 | 3.98844324  | 9.57E-06    | 18.22243828 |
| LATS2        | NM_014572    | 97.54070721 | 7.460495522 | 2.54E-07    | 13.07429338 |
| B3GNT2       | NM_006577    | 63.70332862 | 8.684235934 | 0.000249998 | 7.335513349 |
| CWC15        | NM_016403    | 179.9077322 | 6.089897483 | 1.47E-17    | 29.54199684 |
| VAMP3        | NM_004781    | 54.72749646 | 7.36079303  | 0.00085552  | 7.435000039 |
| PARP1        | NM_001618    | 234.4747572 | 9.76181571  | 6.20E-20    | 24.01958449 |
| SFXN2        | NM_178858    | 159.1780858 | 12.14668441 | 4.03E-12    | 13.10465313 |
| DYNC1LI1     | NM_016141    | 95.31428571 | 4.10639356  | 3.59E-08    | 23.21119111 |
| DARS-AS1     | NR_110200    | 168.153918  | 7.938902559 | 1.79E-14    | 21.18100288 |
| C8orf49      | NR_103552    | 37.80880717 | 0.419035006 | 0.000156666 | 90.22827847 |
| ECHDC3       | NM_024693    | 101.3516643 | 4.651891258 | 3.72E-09    | 21.7871955  |
| ATP8B1       | NM_005603    | 55.76047148 | 5.925549559 | 0.000249998 | 9.41017722  |
| DOT1L        | NM_032482    | 72.5186893  | 13.0675882  | 0.000627703 | 5.549508311 |
| PUS3         | NM_031307    | 121.3692786 | 11.44131561 | 5.96E-09    | 10.60798275 |
| LOC100130691 | NR_026966    | 160.0505893 | 4.076423936 | 1.90E-14    | 39.26249867 |
| WWC2         | NM_024949    | 46.78463932 | 4.206206476 | 0.000560597 | 11.12276337 |
| LSM7         | NM_016199    | 147.1033286 | 18.53369504 | 5.53E-09    | 7.937075058 |
| DENND6A      | NM_152678    | 269.3451108 | 5.434657166 | 6.68E-26    | 49.56064432 |
| LOC101926895 | NR_120372    | 139.1604715 | 9.256700918 | 2.75E-11    | 15.03348468 |
| SEMA3C       | NM_006379    | 70.61321075 | 1.938672979 | 1.48E-06    | 36.42347704 |
| LGALS3BP     | NM_005567    | 227.7253465 | 15.34515201 | 2.84E-18    | 14.84021445 |
| AAK1         | NM_014911    | 130.1846393 | 4.686217018 | 2.31E-11    | 27.78032661 |
| AKIRIN2      | NM_018064    | 217.5560679 | 8.977071552 | 5.03E-19    | 24.23463672 |
| LINC00482    | NR_038080    | 65.92975012 | 15.7501897  | 0.002410604 | 4.185965463 |
| KLHL18       | NM_025010    | 152.9802357 | 7.181066194 | 6.68E-13    | 21.30327609 |
| SLC25A43     | NM_145305    | 64.57583215 | 2.387339696 | 3.47E-06    | 27.04928513 |

|           |              |             |             |             |             |
|-----------|--------------|-------------|-------------|-------------|-------------|
| BHLHE40   | NM_003670    | 106.3560679 | 13.46524514 | 1.22E-06    | 7.89856158  |
| RPS12     | NM_001016    | 244.3230929 | 50.59886601 | 2.03E-10    | 4.828627836 |
| C19orf10  | NM_019107    | 104.4505893 | 14.34228664 | 1.35E-06    | 7.282701284 |
| FEM1B     | NM_015322    | 207.5472607 | 7.621958362 | 3.36E-19    | 27.23017509 |
| EAPP      | NM_018453    | 124.3077322 | 6.03055178  | 8.46E-11    | 20.61299476 |
| DLAT      | NM_001931    | 108.2615464 | 4.407352361 | 1.08E-09    | 24.56385094 |
| FAM127A   | NM_001078171 | 214.4571429 | 20.71779726 | 4.72E-12    | 10.35134866 |
| ORAI3     | NM_152288    | 161.9560679 | 27.78694213 | 2.20E-08    | 5.828495527 |
| RIBC2     | NM_015653    | 92.53630363 | 11.46716575 | 8.59E-06    | 8.069675252 |
| ANXA4     | NM_001153    | 196.66595   | 7.297328176 | 5.81E-17    | 26.95040504 |
| TGS1      | NM_024831    | 248.4549929 | 6.048803423 | 6.45E-23    | 41.07506486 |
| KIAA1377  | NM_020802    | 119.4638001 | 2.984145677 | 1.12E-11    | 40.03283118 |
| DCPS      | NM_014026    | 298.0176143 | 10.32768873 | 2.06E-26    | 28.85617703 |
| ACAA2     | NM_006111    | 94.44178218 | 2.973038618 | 1.41E-09    | 31.76607986 |
| LINC00896 | NR_026919    | 147.9758322 | 36.84962276 | 1.23E-05    | 4.015667491 |
| JPX       | NR_024582    | 90.47035361 | 2.9594935   | 1.43E-08    | 30.56953956 |
| NKX2-8    | NM_014360    | 83.56047148 | 14.79500443 | 0.000152206 | 5.647884179 |
| FNBP4     | NM_015308    | 97.38023574 | 9.180049876 | 2.22E-07    | 10.60781118 |
| INO80D    | NM_017759    | 80.62201792 | 3.935156059 | 2.06E-07    | 20.48762913 |
| PGAM1     | NM_002629    | 115.3319    | 19.39828706 | 1.66E-06    | 5.945468263 |
| FKBP15    | NM_015258    | 182.8461858 | 4.979915471 | 3.37E-17    | 36.71672478 |
| TRMT61A   | NM_152307    | 71.64618576 | 12.67811904 | 0.000289865 | 5.651168405 |
| NT5M      | NM_020201    | 60.60440358 | 7.169561442 | 0.000474722 | 8.453014048 |
| OARD1     | NM_145063    | 134.1560679 | 18.40887559 | 3.98E-08    | 7.287575346 |
| ANKRD52   | NM_173595    | 160.0505893 | 11.73160341 | 2.68E-12    | 13.64268665 |
| ETHE1     | NM_014297    | 309.9319    | 13.67282984 | 8.87E-26    | 22.66772158 |
| TBX6      | NM_004608    | 81.65499293 | 16.69633145 | 0.00023575  | 4.89059487  |
| PIGN      | NM_176787    | 55.92094295 | 1.834343605 | 3.68E-05    | 30.48553324 |
| CCDC25    | NM_018246    | 204.7692786 | 6.132458324 | 8.70E-19    | 33.39105915 |
| NDUFS4    | NM_002495    | 115.3319    | 2.558728274 | 5.57E-11    | 45.07391473 |
| LOC284080 | NR_038230    | 203.8967751 | 33.93628029 | 1.92E-10    | 6.008224041 |
| TRIM59    | NM_173084    | 176.9692786 | 10.1429124  | 9.89E-15    | 17.4475803  |
| CBR4      | NM_032783    | 162.1165394 | 6.307264317 | 6.92E-15    | 25.7031466  |
| ZNF215    | NM_013250    | 119.3033286 | 2.852664245 | 1.31E-12    | 41.82172117 |
| EIF3E     | NM_001568    | 149.3297501 | 6.993972217 | 1.60E-12    | 21.35120722 |
| HS3ST3B1  | NM_006041    | 141.06595   | 5.768431988 | 9.85E-13    | 24.45481724 |
| SLC35E3   | NM_018656    | 182.8461858 | 5.862882114 | 1.57E-17    | 31.18708209 |
| CDKN2AIP  | NM_017632    | 98.41321075 | 4.443367006 | 3.79E-09    | 22.1483417  |
| MTCH2     | NM_014342    | 151.0747572 | 9.366631514 | 3.23E-12    | 16.12903817 |
| PAFAH2    | NM_000437    | 48.85058935 | 8.296622036 | 0.004432675 | 5.888009497 |
| SNTB2     | NM_006750    | 201.6703536 | 3.737074386 | 8.87E-19    | 53.96476836 |
| ANKDD1A   | NM_182703    | 97.54070721 | 9.733541727 | 1.05E-06    | 10.02109098 |
| GLB1L2    | NM_138342    | 47.65714286 | 6.712134451 | 0.001276872 | 7.100147234 |
| CENPF     | NM_016343    | 109.2945215 | 6.245807319 | 2.45E-09    | 17.49886218 |
| FAM27C    | NR_027421    | 45.75166431 | 2.82351865  | 0.001710518 | 16.2037762  |
| CNTNAP3B  | NM_001201380 | 49.72309288 | 2.59589678  | 0.000291998 | 19.15449538 |
| PARM1     | NM_015393    | 136.2220179 | 3.870741843 | 3.47E-13    | 35.19274172 |
| ELOF1     | NM_032377    | 203.8967751 | 15.97505011 | 1.85E-15    | 12.76345136 |
| PARPBP    | NM_017915    | 108.4220179 | 1.777974776 | 7.44E-11    | 60.98062772 |
| MFSD6     | NM_017694    | 35.74285714 | 3.98591831  | 0.003372473 | 8.967282909 |
| DHX37     | NM_032656    | 78.55606789 | 6.272424064 | 2.51E-06    | 12.5240365  |
| DNAJB2    | NM_001039550 | 85.46595002 | 17.29938054 | 0.000169912 | 4.940405225 |
| UXT-AS1   | NR_028119    | 89.4373786  | 1.84837042  | 7.73E-08    | 48.38715099 |
| PHTF1     | NM_006608    | 44.87916077 | 3.823696919 | 0.000480998 | 11.73711247 |
| SMC5      | NM_015110    | 304.9274965 | 3.954694409 | 7.62E-30    | 77.10519826 |
| S100A11   | NM_005620    | 203.5758322 | 12.36048126 | 4.42E-17    | 16.4698953  |
| STRN      | NM_003162    | 61.6373786  | 3.394894171 | 1.14E-05    | 18.15590575 |
| VCPIP1    | NM_025054    | 118.4308251 | 6.491842162 | 1.52E-09    | 18.24302288 |
| C1orf74   | NM_152485    | 205.6417822 | 15.90652431 | 1.14E-14    | 12.92814056 |
| FAM208B   | NM_017782    | 72.5186893  | 5.062954881 | 1.04E-05    | 14.32339237 |
| FZD4      | NM_012193    | 212.5516643 | 14.22480386 | 4.79E-17    | 14.94232655 |
| FRMPD1    | NM_014907    | 49.72309288 | 5.987963358 | 0.001383466 | 8.303840539 |



|              |              |             |             |             |             |
|--------------|--------------|-------------|-------------|-------------|-------------|
| STAMBPL1     | NM_020799    | 170.0593965 | 6.355645222 | 5.21E-15    | 26.75721985 |
| DPY19L1      | NM_015283    | 250.2       | 3.048727224 | 1.65E-25    | 82.06703376 |
| PSMB7        | NM_002799    | 90.47035361 | 7.421291237 | 7.58E-07    | 12.1906486  |
| KCNG1        | NM_002237    | 309.9319    | 9.432194753 | 6.66E-29    | 32.85893773 |
| EIF3M        | NM_006360    | 133.2835644 | 7.594049375 | 9.81E-12    | 17.55105317 |
| GPBP1L1      | NM_021639    | 124.4682037 | 6.374875356 | 4.66E-11    | 19.52480586 |
| LINC00574    | NR_026780    | 65.76927864 | 6.727048449 | 7.42E-05    | 9.776840339 |
| LINC01137    | NR_038842    | 97.38023574 | 6.695150859 | 7.53E-08    | 14.54489044 |
| DYM          | NM_017653    | 170.9319    | 3.545049228 | 3.09E-16    | 48.21707375 |
| SRGAP1       | NM_020762    | 48.85058935 | 3.938061662 | 0.000305038 | 12.40472942 |
| EIF2S3       | NM_001415    | 92.37583215 | 6.472433658 | 3.55E-07    | 14.27219451 |
| C7orf13      | NR_026865    | 74.58463932 | 9.594520921 | 0.000136773 | 7.773669987 |
| C1RL-AS1     | NR_026947    | 114.298925  | 11.85001554 | 4.44E-08    | 9.645466258 |
| C19orf53     | NM_014047    | 131.3780858 | 22.93720035 | 5.91E-07    | 5.727729793 |
| ENPP4        | NM_014936    | 196.66595   | 4.190983985 | 1.56E-20    | 46.92596076 |
| LOC100506100 | NR_046240    | 91.50332862 | 17.20782623 | 6.33E-05    | 5.317541414 |
| NPC2         | NM_006432    | 147.1033286 | 4.019225095 | 1.30E-14    | 36.59992291 |
| BAZ1B        | NM_032408    | 123.1142857 | 8.08851144  | 9.83E-10    | 15.22088293 |
| WDR83OS      | NM_016145    | 283.1648751 | 52.37541768 | 1.04E-11    | 5.406446146 |
| ERP44        | NM_015051    | 212.7121358 | 3.74082311  | 1.14E-19    | 56.86238818 |
| HFM1         | NM_001017975 | 130.3451108 | 1.977949689 | 7.85E-13    | 65.89910327 |
| KAZALD1      | NM_030929    | 300.2440358 | 62.31990477 | 4.24E-13    | 4.817787141 |
| APMAP        | NM_020531    | 275.0615464 | 8.999863944 | 5.56E-25    | 30.56285608 |
| NUFIP2       | NM_020772    | 264.1802357 | 10.20591439 | 4.79E-23    | 25.88501389 |
| RHPN2        | NM_033103    | 95.31428571 | 7.412940666 | 4.63E-07    | 12.85782391 |
| ACTRT3       | NM_032487    | 75.45714286 | 17.1787477  | 0.001448836 | 4.39247052  |
| MROH6        | NM_001100878 | 200.9583215 | 47.22922254 | 2.16E-08    | 4.254957222 |
| AGK          | NM_018238    | 203.5758322 | 4.299882858 | 8.41E-19    | 47.34450655 |
| ZNF321P      | NR_037805    | 147.2638001 | 6.181527514 | 7.00E-14    | 23.82320547 |
| SOX9         | NM_000346    | 238.6066572 | 20.86718162 | 2.52E-17    | 11.43454164 |
| ZSCAN16      | NM_025231    | 124.4682037 | 11.61274404 | 5.67E-09    | 10.71824224 |
| SKA1         | NM_001039535 | 183.8791608 | 4.991742521 | 5.81E-18    | 36.83666776 |
| SYNGR4       | NM_012451    | 39.00225365 | 4.518105205 | 0.004688305 | 8.632435919 |
| DBF4         | NM_006716    | 110.3274965 | 4.34233786  | 3.94E-10    | 25.40739574 |
| HOTTIP       | NR_037843    | 91.50332862 | 3.199799699 | 4.16E-09    | 28.59658017 |
| SNHG11       | NR_003239    | 142.098925  | 16.77187207 | 1.68E-09    | 8.472454621 |
| RABL3        | NM_173825    | 49.88356436 | 3.979292324 | 0.000249748 | 12.53578785 |
| DDB1         | NM_001923    | 118.2703536 | 8.300694436 | 1.81E-09    | 14.24824809 |
| ZW10         | NM_004724    | 133.2835644 | 5.144379443 | 2.70E-12    | 25.90857961 |
| PNPLA5       | NM_138814    | 120.6572466 | 9.246144839 | 1.26E-09    | 13.04946534 |
| CHAC2        | NM_001008708 | 157.9846393 | 7.543889059 | 2.53E-14    | 20.94206822 |
| LINS         | NM_001040616 | 103.4176143 | 3.470092506 | 2.28E-09    | 29.80255257 |
| LINC01267    | NR_110135    | 58.69892504 | 8.392252482 | 0.000361464 | 6.994418383 |
| CAMK4        | NM_001744    | 67.67475719 | 2.557546861 | 3.39E-06    | 26.46080829 |
| ACYP1        | NM_203488    | 126.3736822 | 2.427483508 | 1.79E-14    | 52.05954306 |
| UBXN4        | NM_014607    | 97.54070721 | 6.341280088 | 2.65E-08    | 15.38186389 |
| EPRS         | NM_004446    | 95.47475719 | 4.747072431 | 6.21E-08    | 20.11234473 |
| PNRC2        | NM_017761    | 227.4044036 | 20.21139264 | 4.17E-16    | 11.2512981  |
| NHEJ1        | NM_024782    | 206.6747572 | 6.030980111 | 5.80E-19    | 34.26885073 |
| C1orf228     | NM_001145636 | 72.67916077 | 11.57329987 | 0.000196074 | 6.279899559 |
| MED31        | NM_016060    | 167.9934465 | 11.3731566  | 8.77E-14    | 14.77104839 |
| C5orf15      | NM_020199    | 156.9516643 | 9.230204668 | 8.31E-13    | 17.00413696 |
| TAF8         | NM_138572    | 234.4747572 | 9.580615933 | 1.51E-20    | 24.47387087 |
| ATXN7L2      | NM_153340    | 120.3363036 | 7.673924    | 3.16E-10    | 15.68119565 |
| NAA50        | NM_025146    | 229.4703536 | 3.695765552 | 2.98E-24    | 62.09007319 |
| MYO10        | NM_012334    | 260.2088072 | 5.185095917 | 1.18E-23    | 50.18399106 |
| GPR125       | NM_145290    | 75.45714286 | 3.995447586 | 8.72E-07    | 18.88577969 |
| SPC24        | NM_182513    | 146.2308251 | 11.36066882 | 3.69E-11    | 12.87167396 |
| HINT2        | NM_032593    | 227.7253465 | 39.35837332 | 1.21E-10    | 5.785944066 |
| PCNX         | NM_014982    | 47.65714286 | 3.119238763 | 0.000293342 | 15.27845301 |
| ARPC4-TTLL3  | NM_001198793 | 176.9692786 | 18.04619673 | 8.23E-12    | 9.806458462 |
| ZBTB11       | NM_014415    | 183.8791608 | 6.492896373 | 9.33E-17    | 28.32005167 |

|               |              |             |             |             |             |
|---------------|--------------|-------------|-------------|-------------|-------------|
| EIF3F         | NM_003754    | 118.4308251 | 8.333216402 | 8.35E-10    | 14.21189843 |
| LRRRC47       | NM_020710    | 123.1142857 | 13.64425399 | 4.36E-08    | 9.023159918 |
| RAB38         | NM_022337    | 200.6373786 | 3.348775595 | 1.93E-19    | 59.91365289 |
| RAC2          | NM_002872    | 92.37583215 | 13.41062672 | 9.63E-06    | 6.888256164 |
| HLX-AS1       | NR_046901    | 54.72749646 | 3.679138686 | 6.20E-05    | 14.87508386 |
| DNAJC25-GNG10 | NM_004125    | 287.1363036 | 8.936332894 | 1.23E-25    | 32.13133475 |
| GBAP1         | NR_002188    | 230.6638001 | 21.54280153 | 2.55E-16    | 10.70723321 |
| PISD          | NM_014338    | 149.0088072 | 20.37656648 | 3.12E-09    | 7.312753467 |
| DNAJC3        | NM_006260    | 237.4132108 | 4.248737915 | 3.54E-22    | 55.87852569 |
| TMEM180       | NM_024789    | 218.7495144 | 33.82629183 | 2.71E-12    | 6.46684879  |
| FLJ27354      | NR_033981    | 119.4638001 | 10.89151779 | 3.30E-09    | 10.96851719 |
| EXOSC6        | NM_058219    | 155.0461858 | 2.963151427 | 3.20E-15    | 52.3247595  |
| TEX19         | NM_207459    | 40.03522867 | 3.611376579 | 0.001740302 | 11.08586374 |
| PCNXL4        | NM_022495    | 209.7736822 | 6.208164426 | 6.00E-19    | 33.78996879 |
| FBXO42        | NM_018994    | 157.2726073 | 6.253888934 | 5.53E-14    | 25.14796936 |
| EGLN3         | NM_022073    | 320.8132108 | 6.592862675 | 1.88E-31    | 48.66068453 |
| WASL          | NM_003941    | 211.5186893 | 2.352169319 | 1.75E-22    | 89.92494188 |
| TTLL5         | NM_015072    | 172.8373786 | 4.120103509 | 3.67E-15    | 41.94976612 |
| GP1BB         | NM_000407    | 106.3560679 | 22.1879203  | 0.000365868 | 4.793422118 |
| GEMIN6        | NM_024775    | 115.3319    | 10.75732471 | 2.27E-08    | 10.72124372 |
| LOC401052     | NM_001008737 | 165.0549929 | 31.78418843 | 7.28E-08    | 5.192990638 |
| TMEM183A      | NM_138391    | 123.2747572 | 7.36472106  | 1.21E-10    | 16.73855075 |
| LPCAT3        | NM_005768    | 192.6945215 | 12.19161825 | 8.15E-15    | 15.80549173 |
| LOC100128568  | NR_046376    | 139.1604715 | 11.89576439 | 6.03E-10    | 11.69832109 |
| DNAH17-AS1    | NR_102401    | 104.4505893 | 13.19072601 | 4.66E-07    | 7.918486766 |
| COG3          | NM_031431    | 180.7802357 | 4.464325645 | 9.47E-17    | 40.4944106  |
| PDZD11        | NM_016484    | 88.40440358 | 9.904533411 | 3.76E-06    | 8.925650499 |
| C17orf67      | NM_001085430 | 59.73190005 | 8.710171608 | 0.000489073 | 6.857717934 |
| CCNG2         | NM_004354    | 61.79785007 | 8.742833953 | 0.000597802 | 7.068400293 |
| LOC646762     | NR_024278    | 55.76047148 | 1.767325885 | 1.74E-05    | 31.5507581  |
| COMMD1        | NM_152516    | 208.5802357 | 4.151777202 | 7.51E-19    | 50.23878344 |
| CRADD         | NM_003805    | 156.9516643 | 5.144959332 | 7.25E-14    | 30.50590961 |
| SYNJ2BP       | NM_018373    | 105.3230929 | 6.462365056 | 2.74E-08    | 16.29791755 |
| LARP1         | NM_015315    | 63.70332862 | 8.217590866 | 0.000313162 | 7.752068661 |
| ZNF17         | NM_006959    | 73.71213579 | 8.71998788  | 4.51E-05    | 8.45323833  |
| ENDOD1        | NM_015036    | 61.95832155 | 6.0118453   | 5.92E-05    | 10.30604057 |
| MSANTD4       | NM_032424    | 159.0176143 | 3.136948519 | 5.70E-18    | 50.69181511 |
| PAG1          | NM_018440    | 292.1407072 | 7.501194103 | 9.98E-26    | 38.94589358 |
