# Supplementary material for: Multiple P-TEFbs cooperatively regulate the release of promoter-proximally paused RNA polymerase II
Source: PubMed Central journal article supplement — Nucleic Acids Res. 2016 Jun 28;44(14):6853–67. doi: 10.1093/nar/gkw571 (PMC5001612; doi:10.1093/nar/gkw571), 2016-06-28
Supplement: supp_gkw571_nar-00736-v-2016-File012.pdf [file supp_gkw571_nar-00736-v-2016-File012.pdf]

**Table S2. Pol II ChIP-Seq Data. Related to Figure 7F****Sheet1: Pausing genes in untreated HCT116 cells expressing shGFP**

| Symbol       | Gene ID      | Promoter RPK | Gene Body RPK | pValue      | Pause Ratio(TR) |
|--------------|--------------|--------------|---------------|-------------|-----------------|
| MRPS12       | NM_021107    | 84.18275656  | 7.441494649   | 4.04E-06    | 11.312614       |
| APTX         | NR_036579    | 93.01930787  | 3.784005525   | 1.43E-08    | 24.58223363     |
| HFE          | NM_139008    | 57.40797988  | 2.668950296   | 1.52E-05    | 21.5095725      |
| MEST         | NM_001253902 | 36.40669621  | 1.391469749   | 0.001050046 | 26.16420245     |
| PLD3         | NM_001031696 | 61.59073644  | 3.368762882   | 4.26E-06    | 18.28289452     |
| NUDT15       | NM_018283    | 113.2844306  | 7.160702583   | 1.16E-09    | 15.82029547     |
| TRMT1        | NM_017722    | 38.46847084  | 0.421534709   | 0.000138712 | 91.25813366     |
| CALU         | NM_001199672 | 126.2445312  | 1.80957936    | 6.79E-14    | 69.76457293     |
| NUDT4        | NM_001301022 | 35.34620525  | 2.526091451   | 0.0034087   | 13.99244878     |
| AGFG1        | NM_004504    | 40           | 1.464170913   | 0.001144168 | 27.31921502     |
| TMEM222      | NM_032125    | 85.24324752  | 6.832840081   | 5.85E-07    | 12.47552211     |
| MGST1        | NM_001260512 | 131.6936942  | 2.055436536   | 1.14E-14    | 64.07091237     |
| C2orf72      | NM_001144994 | 40.26512274  | 1.098407632   | 0.00021316  | 36.65772303     |
| CHCHD3       | NM_017812    | 106.7747767  | 0.728532603   | 1.45E-11    | 146.5614253     |
| OCIAD1       | NM_001079840 | 38.46847084  | 1.27986976    | 0.001358274 | 30.0565511      |
| MIB2         | NM_001170689 | 98.2033481   | 23.73607449   | 0.000183274 | 4.13730367      |
| MUTYH        | NM_001293190 | 130.162165   | 11.220703     | 4.22E-10    | 11.60017915     |
| TRMT1L       | NM_001202423 | 69.10167405  | 1.111908353   | 3.28E-07    | 62.14691514     |
| ENSA         | NM_207044    | 141.3256137  | 2.724169725   | 8.49E-16    | 51.87841728     |
| RBM10        | NM_001204466 | 86.24453119  | 2.246286662   | 1.17E-08    | 38.3942676      |
| AFF4         | NM_014423    | 140.7953682  | 1.8059709     | 2.91E-14    | 77.96103926     |
| WRNIP1       | NM_020135    | 104.4478793  | 3.912008829   | 4.00E-10    | 26.69929539     |
| HMGN3        | NM_001201363 | 98.99871632  | 3.753832251   | 4.39E-09    | 26.37270653     |
| SYT17        | NM_016524    | 38.46847084  | 0.995336072   | 0.000275271 | 38.64872571     |
| PUF60        | NM_078480    | 123.6525111  | 5.724421866   | 2.65E-11    | 21.60087324     |
| EPT1         | NM_033505    | 132.7541851  | 1.566537523   | 3.33E-14    | 84.7436995      |
| CHST7        | NM_019886    | 111.9588169  | 3.470687693   | 1.09E-10    | 32.25839569     |
| AP1S1        | NM_001283    | 57.93822536  | 7.457147621   | 0.000241794 | 7.769488859     |
| TAF1C        | NM_139353    | 138.4684708  | 1.759804171   | 2.47E-17    | 78.68402243     |
| IDNK         | NR_046422    | 90.95753323  | 3.941058578   | 1.86E-08    | 23.07946746     |
| YY1AP1       | NM_001198906 | 95.34620525  | 2.934865926   | 1.07E-09    | 32.48741429     |
| CLPTM1       | NM_001282175 | 58.46847084  | 2.523940458   | 1.69E-05    | 23.16555078     |
| FDXR         | NM_024417    | 223.9176338  | 10.72034558   | 1.60E-19    | 20.88716564     |
| GORAB        | NR_027397    | 75.34620525  | 0.62168223    | 2.74E-09    | 121.197296      |
| ST3GAL3      | NR_073021    | 103.6525111  | 0.37498846    | 5.83E-12    | 276.4152026     |
| ATP5G3       | NM_001689    | 141.060491   | 9.083104557   | 9.46E-12    | 15.52998648     |
| GUSB         | NM_000181    | 73.01930787  | 2.456613159   | 9.41E-08    | 29.72356784     |
| PDCD6        | NR_073609    | 103.6525111  | 6.780542405   | 1.68E-08    | 15.28675803     |
| GMD5         | NM_001500    | 86.24453119  | 0.32443577    | 1.99E-09    | 265.8292924     |
| ARNTL2       | NM_001248005 | 83.1222656   | 1.232302705   | 3.25E-08    | 67.45279814     |
| CXorf40B     | NM_001013845 | 37.93822536  | 1.90523904    | 0.000413933 | 19.91258029     |
| CPSF3L       | NM_001256460 | 81.06049096  | 7.098695419   | 2.16E-06    | 11.41906874     |
| GSTT2B       | NM_001080843 | 230.6924105  | 37.19987461   | 3.18E-12    | 6.201429787     |
| GRTP1        | NM_024719    | 98.73359358  | 2.265693784   | 2.58E-10    | 43.57764242     |
| NPM1         | NM_002520    | 77.67310262  | 10.5959429    | 3.62E-05    | 7.33045689      |
| CD320        | NM_016579    | 158.4684708  | 12.30552739   | 3.15E-12    | 12.87782846     |
| GPR126       | NM_001032394 | 77.93822536  | 0.698447084   | 8.59E-09    | 111.5878742     |
| FERMT2       | NM_001134999 | 131.4285714  | 1.214492767   | 1.11E-13    | 108.2168417     |
| ZNF384       | NM_001135734 | 47.03989941  | 5.163573136   | 0.001406534 | 9.109951225     |
| RAE1         | NM_003610    | 53.01930787  | 2.817904621   | 2.89E-05    | 18.81515345     |
| GAB1         | NM_207123    | 60.79536822  | 0.066621036   | 9.48E-09    | 912.5551307     |
| LIPT1        | NM_001204830 | 157.4079799  | 2.159800483   | 3.73E-19    | 72.8807967      |
| DYX1C1-CCPG1 | NR_037923    | 41.06049096  | 0.052269452   | 8.23E-06    | 785.5542625     |
| PIEZO1       | NM_001142864 | 101.5907364  | 5.047444369   | 6.79E-09    | 20.12716318     |
| PLSCR3       | NM_020360    | 200.5302455  | 13.79510628   | 5.18E-16    | 14.53633205     |
| WTAP         | NM_001270531 | 116.1415735  | 2.010255182   | 6.29E-13    | 57.7745425      |
| STK10        | NM_005990    | 104.1827566  | 2.174237357   | 7.03E-10    | 47.91691957     |
| GPRC5B       | NM_016235    | 94.81595977  | 1.484912873   | 1.36E-10    | 63.85287751     |
| CDC27        | NM_001293091 | 109.8970423  | 0.434542027   | 3.86E-14    | 252.903138      |
| SERF1A       | NM_021967    | 332.4890624  | 8.315760555   | 2.51E-32    | 39.98300097     |
| PRKAG1       | NM_002733    | 118.2033481  | 6.376115292   | 3.01E-10    | 18.5384584      |

|            |              |             |             |             |             |
|------------|--------------|-------------|-------------|-------------|-------------|
| STXBP2     | NR_073560    | 54.81595977 | 4.189582617 | 0.000101435 | 13.0838713  |
| MYO1C      | NM_001080950 | 43.1222656  | 3.443636294 | 0.000470592 | 12.52230547 |
| PHF7       | NM_016483    | 134.550837  | 5.434661898 | 1.00E-12    | 24.75790391 |
| ELP4       | NM_001288725 | 95.34620525 | 0.082543665 | 1.26E-12    | 1155.100219 |
| ZNF281     | NM_001281293 | 83.1222656  | 3.40511154  | 2.01E-08    | 24.41102578 |
| TUBD1      | NM_001193612 | 42.12098192 | 3.984611577 | 0.002679104 | 10.5709129  |
| FIS1       | NM_016068    | 90.16216501 | 4.501722907 | 4.57E-09    | 20.02836845 |
| FN1        | NM_212476    | 25.71428571 | 0.765154883 | 0.004370597 | 33.60664133 |
| ITPR2      | NM_002223    | 163.6525111 | 0.353925964 | 4.64E-18    | 462.3919339 |
| FAM200B    | NM_001145191 | 158.7335936 | 2.747010607 | 1.06E-18    | 57.7841211  |
| SLC43A3    | NM_199329    | 92.22393965 | 1.357829186 | 1.07E-10    | 67.92013355 |
| COX10-AS1  | NR_049718    | 107.0398994 | 1.081801193 | 6.67E-12    | 98.9459987  |
| ADIPOR1    | NM_001290629 | 74.81595977 | 4.155857393 | 1.22E-06    | 18.00253298 |
| PRIMPOL    | NM_152683    | 48.57142857 | 0.807923643 | 6.28E-06    | 60.11883547 |
| MMP24-AS1  | NR_102706    | 112.2239396 | 20.18573899 | 1.65E-05    | 5.559565578 |
| ALG9       | NM_001077691 | 87.83526763 | 0.531907208 | 7.94E-11    | 165.1326892 |
| CCNB2      | NM_004701    | 95.08108251 | 3.58738385  | 6.67E-09    | 26.50429575 |
| SERTAD1    | NM_013376    | 98.73359358 | 13.22980079 | 3.44E-06    | 7.462969031 |
| ANAPC11    | NM_016476    | 128.3655131 | 11.08869737 | 4.30E-10    | 11.57624821 |
| OGT        | NM_181673    | 66.24453119 | 2.751460594 | 2.40E-06    | 24.07613299 |
| NEDD4L     | NM_015277    | 46.24453119 | 1.401240072 | 0.00039986  | 33.00257544 |
| PPIP5K1    | NM_001130859 | 52.48906239 | 2.130916269 | 7.68E-05    | 24.6321562  |
| PLAGL1     | NM_001289049 | 67.03989941 | 0.749087393 | 7.42E-08    | 89.49543137 |
| MOCS2      | NM_176806    | 134.550837  | 2.181092381 | 2.40E-15    | 61.68965523 |
| TDP1       | NM_001008744 | 177.4079799 | 0.908898371 | 8.47E-20    | 195.1901175 |
| TOMM34     | NM_006809    | 147.3050222 | 6.597754206 | 1.51E-13    | 22.32653984 |
| FAS        | NR_028036    | 64.18275656 | 2.521433873 | 2.70E-06    | 25.45486409 |
| CDC25C     | NM_001287582 | 41.85585918 | 0.157492308 | 2.92E-06    | 265.7644665 |
| CLYBL      | NR_104592    | 204.4478793 | 0.519364231 | 3.39E-23    | 393.6502882 |
| ZNF559     | NM_001202407 | 36.14157347 | 0.39894394  | 2.84E-05    | 90.59311299 |
| ATF2       | NR_045768    | 83.65251108 | 0.915613233 | 1.52E-09    | 91.36227835 |
| POMT1      | NM_007171    | 97.40797988 | 3.10781287  | 2.47E-09    | 31.342936   |
| TPM4       | NM_001145160 | 123.9176338 | 7.618727296 | 3.84E-10    | 16.26487325 |
| CCT8       | NM_001282909 | 80.79536822 | 1.776835324 | 5.67E-09    | 45.47150043 |
| RPAIN      | NR_027685    | 101.060491  | 9.77497312  | 1.49E-07    | 10.33869758 |
| BIRC6      | NM_016252    | 107.3050222 | 1.045363271 | 9.30E-12    | 102.6485482 |
| NDC1       | NM_018087    | 118.7335936 | 1.326593863 | 1.50E-12    | 89.50259522 |
| MRPS18C    | NM_001297767 | 95.87645073 | 3.111070879 | 2.50E-10    | 30.81782912 |
| COL4A5     | NM_000495    | 26.24453119 | 0.072170457 | 0.002764992 | 363.6464611 |
| PTAFR      | NM_001164721 | 43.38738834 | 0.145208646 | 2.92E-06    | 298.7934221 |
| ERGIC3     | NM_198398    | 98.73359358 | 2.969090098 | 4.59E-10    | 33.25382199 |
| CTSL       | NM_145918    | 127.5701449 | 2.126551656 | 5.61E-15    | 59.98920577 |
| YIPF1      | NR_036640    | 64.97812478 | 0.981803964 | 5.64E-07    | 66.18238177 |
| NR1H3      | NM_001251934 | 75.08108251 | 7.312938421 | 1.26E-05    | 10.26688291 |
| ACAD9      | NR_033426    | 54.07979883 | 2.482156597 | 3.09E-05    | 21.78742425 |
| HDAC11-AS1 | NR_046690    | 127.0398994 | 7.196131746 | 5.55E-11    | 17.65391517 |
| LINC00909  | NR_024484    | 67.03989941 | 8.822293676 | 0.000124277 | 7.598919496 |
| CHDH       | NM_018397    | 124.1827566 | 2.73935013  | 4.19E-13    | 45.33292594 |
| TCEB1      | NM_001204857 | 110.162165  | 4.840486535 | 2.74E-10    | 22.75849012 |
| KPNA3      | NM_002267    | 100.5302455 | 0.757310871 | 8.54E-12    | 132.7463387 |
| ARL4A      | NM_001195396 | 80.53024548 | 14.81870417 | 0.000144047 | 5.434364879 |
| RFXANK     | NM_001278727 | 121.8558592 | 9.217939045 | 1.39E-09    | 13.21942558 |
| PRADC1     | NM_032319    | 69.89704227 | 5.755921121 | 5.89E-06    | 12.14350246 |
| GALNT18    | NM_198516    | 131.222656  | 1.07700285  | 5.21E-14    | 121.8405837 |
| KDELRL3    | NM_016657    | 135.0810825 | 7.042575663 | 1.84E-11    | 19.18063631 |
| TNPO3      | NM_012470    | 198.4684708 | 2.572883297 | 6.61E-20    | 77.13854377 |
| ATG5       | NM_004849    | 133.0193079 | 0.126172231 | 3.51E-19    | 1054.267697 |
| ZGPAT      | NM_181485    | 46.50965393 | 0.780702863 | 7.71E-06    | 59.5740789  |
| CFLAR      | NM_001202517 | 58.46847084 | 1.89590861  | 1.82E-05    | 30.83928758 |
| LOC644656  | NR_036539    | 104.4478793 | 12.01130108 | 6.46E-06    | 8.695800615 |
| AKAP1      | NM_003488    | 120.7953682 | 4.097787008 | 4.08E-11    | 29.47819591 |
| ZNF518A    | NM_014803    | 122.1209819 | 3.635294838 | 1.38E-11    | 33.59314371 |
| B4GALT4    | NM_003778    | 133.2844306 | 1.791003945 | 2.82E-15    | 74.41883697 |
| AGPAT9     | NM_032717    | 86.77477667 | 1.048336226 | 7.80E-09    | 82.77380342 |

|              |              |             |             |             |             |
|--------------|--------------|-------------|-------------|-------------|-------------|
| NUDT16P1     | NR_027766    | 103.1222656 | 11.98094436 | 1.02E-06    | 8.607190092 |
| LOC100507053 | NR_037884    | 186.5096539 | 0.483759357 | 1.05E-21    | 385.542215  |
| CENPBD1P1    | NR_026052    | 70.95753323 | 7.519872517 | 1.09E-05    | 9.436002149 |
| OGG1         | NM_016828    | 59.26383906 | 4.605868174 | 4.23E-05    | 12.86702894 |
| FGD5-AS1     | NR_046254    | 154.550837  | 1.488544981 | 3.93E-20    | 103.8267832 |
| PSMB3        | NR_104194    | 47.03989941 | 2.916084452 | 0.000125331 | 16.13118557 |
| TMEM9B       | NM_001286095 | 152.4890624 | 5.542163286 | 3.59E-14    | 27.51435757 |
| ZNF101       | NM_033204    | 95.87645073 | 2.158777383 | 2.99E-10    | 44.41238428 |
| LINC01128    | NR_047526    | 146.7747767 | 2.344362672 | 1.98E-16    | 62.60753867 |
| SCAMP5       | NM_001178111 | 66.50965393 | 1.153583551 | 3.77E-07    | 57.6548217  |
| UPF3B        | NM_080632    | 112.4890624 | 0.545782563 | 1.54E-15    | 206.1060028 |
| UBTD1        | NM_024954    | 84.4478793  | 2.162649517 | 2.28E-08    | 39.04834262 |
| SPCS2        | NM_014752    | 92.48906239 | 0.539277416 | 1.55E-11    | 171.5055361 |
| ALG13        | NM_001257230 | 74.55083703 | 0.563983442 | 4.94E-09    | 132.186216  |
| UBE2E1       | NM_182666    | 28.83655131 | 1.080772873 | 0.002365549 | 26.68141663 |
| CISH         | NM_013324    | 112.2239396 | 7.023905948 | 1.88E-09    | 15.9774263  |
| DCUN1D4      | NM_001287757 | 46.50965393 | 2.582276998 | 0.000341333 | 18.01110182 |
| NUDT1        | NM_198949    | 157.6731026 | 7.764069252 | 7.88E-14    | 20.30804949 |
| DDX12P       | NR_033399    | 121.3256137 | 4.946226002 | 4.19E-11    | 24.52892643 |
| ZNF324       | NM_014347    | 83.91763382 | 6.396065934 | 1.24E-06    | 13.12019524 |
| HOOK2        | NM_001100176 | 83.1222656  | 11.49959933 | 2.77E-05    | 7.228274934 |
| FXYD5        | NM_001164605 | 81.06049096 | 3.74351213  | 1.77E-07    | 21.65359378 |
| TMEM218      | NM_001258238 | 32.22393965 | 1.114098118 | 0.003700192 | 28.92378967 |
| DAG1         | NM_004393    | 123.3873883 | 2.485626649 | 2.32E-12    | 49.64035464 |
| VPS13C       | NM_017684    | 90.16216501 | 0.145494463 | 8.41E-12    | 619.6948201 |
| BOD1         | NM_001159651 | 31.69369417 | 2.731243239 | 0.004439356 | 11.60412728 |
| CCDC14       | NM_022757    | 131.9588169 | 1.457359439 | 2.12E-14    | 90.54651402 |
| CD109        | NM_133493    | 89.89704227 | 0.9089396   | 5.29E-10    | 98.9032079  |
| CTF1         | NM_001142544 | 86.50965393 | 6.903479124 | 7.96E-07    | 12.53131246 |
| CCNA2        | NM_001237    | 112.7541851 | 2.594306264 | 3.77E-12    | 43.46217202 |
| RHOT1        | NM_001288755 | 88.57142857 | 0.806414175 | 1.87E-10    | 109.8336703 |
| TARBP1       | NM_005646    | 143.9176338 | 0.825053564 | 4.03E-17    | 174.4342914 |
| TEC          | NM_003215    | 231.9588169 | 0.132481669 | 5.51E-35    | 1750.87481  |
| PRPF40A      | NM_017892    | 106.5096539 | 1.411849723 | 6.04E-11    | 75.43979518 |
| RRP12        | NM_015179    | 55.34620525 | 0.518036908 | 5.75E-07    | 106.8383437 |
| HINT3        | NM_138571    | 47.30502215 | 0.13900745  | 6.14E-08    | 340.3056602 |
| SLC37A4      | NM_001164278 | 124.1827566 | 12.21307936 | 4.53E-09    | 10.16801356 |
| HSPA14       | NM_016299    | 67.83526763 | 1.918770777 | 6.12E-07    | 35.35350258 |
| SPHK1        | NM_021972    | 84.71300204 | 5.747025389 | 2.61E-07    | 14.74032152 |
| FAM124A      | NM_001242312 | 97.67310262 | 0.691891255 | 4.68E-12    | 141.1682861 |
| MEIS3        | NM_001301059 | 60          | 3.291221687 | 2.96E-05    | 18.23031254 |
| NBR1         | NM_005899    | 49.63191953 | 0.958584121 | 6.89E-06    | 51.77627964 |
| LINC00883    | NR_028301    | 120.5302455 | 2.187544518 | 1.29E-13    | 55.09841948 |
| B3GALNT1     | NM_033168    | 43.91763382 | 2.081992994 | 0.000343476 | 21.09403535 |
| NCK1-AS1     | NR_110175    | 127.0398994 | 1.380788296 | 1.66E-15    | 92.005342   |
| KDM3A        | NM_001146688 | 40.26512274 | 1.818564529 | 0.001033106 | 22.14115699 |
| CTNBL1       | NM_001281495 | 69.10167405 | 0.443959357 | 6.25E-08    | 155.648649  |
| LOC554206    | NR_038379    | 109.3667968 | 17.56512173 | 4.18E-05    | 6.226361451 |
| LOC283922    | NR_026950    | 144.1827566 | 3.301523367 | 7.13E-14    | 43.67158446 |
| PLAUR        | NM_001005377 | 121.060491  | 4.832396743 | 1.92E-11    | 25.05185261 |
| UPP1         | NM_001287426 | 49.63191953 | 2.944217129 | 9.87E-05    | 16.85742503 |
| SEC14L1      | NM_001039573 | 54.55083703 | 1.611320995 | 3.92E-05    | 33.85472987 |
| TBC1D14      | NM_001113361 | 138.2033481 | 2.851056108 | 2.43E-13    | 48.47443996 |
| SPIN2B       | NM_001282462 | 83.38738834 | 4.977850464 | 1.03E-06    | 16.75168608 |
| RBM39        | NR_040724    | 98.46847084 | 4.853594555 | 1.47E-08    | 20.28774133 |
| NAPB         | NM_022080    | 61.59073644 | 1.378052128 | 2.75E-06    | 44.69405415 |
| LOC100507506 | NR_103764    | 118.7335936 | 1.271758205 | 1.09E-14    | 93.36176728 |
| SC5D         | NM_006918    | 118.7335936 | 1.307985667 | 1.09E-14    | 90.77591336 |
| LRCH1        | NM_001164211 | 63.65251108 | 1.327418701 | 7.24E-06    | 47.95209758 |
| DSN1         | NM_001145318 | 95.87645073 | 1.574298964 | 3.95E-11    | 60.90104414 |
| TSPAN9       | NM_001168320 | 108.8365513 | 0.542115024 | 2.41E-12    | 200.762839  |
| PACSLN3      | NM_016223    | 135.611328  | 7.991390479 | 3.88E-11    | 16.9696786  |
| MOCS1        | NM_001075098 | 66.50965393 | 1.904266129 | 1.12E-06    | 34.92665911 |
| NQO2         | NM_001290222 | 183.3873883 | 6.153346869 | 2.28E-17    | 29.80286863 |

|              |              |             |             |             |             |
|--------------|--------------|-------------|-------------|-------------|-------------|
| MAGT1        | NM_032121    | 27.03989941 | 0.376636768 | 0.003274355 | 71.79304237 |
| ZSWIM5       | NM_020883    | 68.83655131 | 0.198971805 | 1.90E-08    | 345.9613344 |
| SRR          | NM_021947    | 164.713002  | 6.054630669 | 2.35E-15    | 27.2044673  |
| RPL22        | NM_000983    | 97.93822536 | 5.056363065 | 2.15E-08    | 19.36930242 |
| MAGED2       | NM_201222    | 31.42857143 | 0.847430195 | 0.00123093  | 37.08691478 |
| SLC35A2      | NM_001282647 | 80          | 6.337867529 | 9.90E-07    | 12.62254215 |
| GLYCTK       | NR_026699    | 76.93694168 | 0.514460522 | 2.23E-11    | 149.5487768 |
| LOC101929574 | NR_120661    | 57.40797988 | 1.49062362  | 2.94E-06    | 38.51272655 |
| RBAK-RBAKDN  | NM_001204513 | 138.9987163 | 2.450171508 | 1.51E-15    | 56.73019863 |
| CNTNAP1      | NM_003632    | 43.65251108 | 3.686421274 | 0.002041429 | 11.84143315 |
| API5         | NM_001142930 | 103.1222656 | 1.380619948 | 1.82E-11    | 74.69272464 |
| PHOSPHO2     | NM_001199288 | 161.3256137 | 3.69001589  | 2.18E-17    | 43.71949025 |
| ZNF182       | NM_006962    | 29.10167405 | 0.921653122 | 0.001500666 | 31.57551724 |
| MOB1B        | NM_173468    | 89.89704227 | 1.051340554 | 3.35E-10    | 85.50706228 |
| DROSHA       | NM_013235    | 71.95881691 | 0.519085912 | 2.33E-08    | 138.6260254 |
| ZCCHC17      | NM_001282571 | 100.7953682 | 0.705921331 | 2.82E-12    | 142.7855539 |
| TLE3         | NM_020908    | 108.8365513 | 2.780109417 | 6.39E-11    | 39.14829778 |
| SAR1A        | NM_020150    | 103.6525111 | 3.834679525 | 8.22E-10    | 27.03029299 |
| OGDH         | NM_001003941 | 199.2638391 | 2.38927325  | 6.36E-21    | 83.39935127 |
| TMEM61       | NM_182532    | 75.87645073 | 1.890599069 | 4.60E-09    | 40.13354918 |
| SAMD5        | NM_001030060 | 124.4478793 | 0.721398428 | 1.76E-14    | 172.5092188 |
| TBRG4        | NM_199122    | 110.162165  | 6.963227003 | 3.90E-09    | 15.82056207 |
| OSGIN2       | NM_004337    | 72.48906239 | 3.716030125 | 3.34E-06    | 19.50712452 |
| CYHR1        | NM_032687    | 164.713002  | 38.66194263 | 3.02E-06    | 4.260339518 |
| PMS2         | NM_000535    | 133.0193079 | 0.707358751 | 6.27E-17    | 188.0506995 |
| MTDH         | NM_178812    | 161.060491  | 1.034304096 | 1.87E-17    | 155.7187017 |
| SSB          | NM_003142    | 154.8159598 | 2.524666988 | 6.66E-18    | 61.32133881 |
| ENOSF1       | NM_001126123 | 111.4285714 | 6.171745263 | 7.27E-10    | 18.05462907 |
| CCDC47       | NM_020198    | 97.40797988 | 3.827440716 | 7.05E-09    | 25.44989906 |
| GEM          | NM_181702    | 190.162165  | 3.75163891  | 8.29E-21    | 50.68775796 |
| XIAP         | NM_001167    | 60.53024548 | 0.726351342 | 2.51E-07    | 83.33466464 |
| ZNF76        | NM_003427    | 86.24453119 | 1.611295694 | 4.94E-09    | 53.52495604 |
| ETNK1        | NM_018638    | 167.8352676 | 1.293154194 | 1.26E-18    | 129.7875137 |
| INO80C       | NM_001098817 | 115.611328  | 1.05617664  | 1.30E-13    | 109.4621142 |
| CHTF8        | NM_001039690 | 117.4079799 | 7.155480706 | 2.88E-10    | 16.40811913 |
| CARS         | NM_001014437 | 101.5907364 | 2.259664657 | 2.36E-10    | 44.95832428 |
| SRSF1        | NR_034041    | 131.7529015 | 14.83729787 | 3.81E-09    | 8.879844739 |
| ZC3H11A      | NM_014827    | 69.89704227 | 2.438339128 | 1.38E-06    | 28.66584121 |
| SMPDL3A      | NM_006714    | 44.97812478 | 2.999245312 | 0.000209902 | 14.99648082 |
| RANBP3       | NM_003624    | 53.28443061 | 0.985098686 | 2.26E-06    | 54.09044935 |
| TMEM186      | NM_015421    | 58.46847084 | 8.987401911 | 0.00083828  | 6.505603223 |
| CCDC69       | NM_015621    | 113.2844306 | 2.078074897 | 5.51E-12    | 54.51412303 |
| MATN1-AS1    | NR_034182    | 146.5096539 | 8.554921519 | 1.61E-12    | 17.12577417 |
| RBBP8        | NM_203291    | 86.77477667 | 0.273150922 | 2.87E-11    | 317.6807016 |
| ATP2C1       | NM_001199183 | 71.95881691 | 0.596304228 | 2.58E-08    | 120.6746716 |
| PDLIM5       | NR_046186    | 168.8365513 | 2.876547015 | 1.45E-19    | 58.6941741  |
| SKP1         | NM_170679    | 177.9382254 | 1.27925261  | 3.57E-23    | 139.0954562 |
| SCMH1        | NM_001172218 | 46.50965393 | 0.985421277 | 4.08E-05    | 47.19773667 |
| TM2D3        | NM_025141    | 104.9781248 | 1.742974739 | 2.28E-12    | 60.22928642 |
| GLTSCR2      | NM_015710    | 106.7747767 | 4.358821831 | 8.11E-10    | 24.49624711 |
| HCCS         | NM_005333    | 120.2651227 | 0.453742238 | 2.27E-18    | 265.0516366 |
| CMTR2        | NM_018348    | 87.57014489 | 8.690751001 | 6.78E-07    | 10.07624599 |
| TPD52L2      | NR_045090    | 112.4890624 | 3.81206266  | 1.56E-10    | 29.50871285 |
| BIN1         | NM_139348    | 89.36679679 | 1.203432584 | 3.43E-09    | 74.2599112  |
| DLST         | NM_001933    | 118.7335936 | 2.925129844 | 4.46E-12    | 40.59087969 |
| PSMA1        | NM_148976    | 103.1222656 | 0.764997655 | 9.68E-12    | 134.8007604 |
| MPND         | NM_001300862 | 57.40797988 | 5.647103027 | 9.59E-05    | 10.16591686 |
| RNF138P1     | NR_001575    | 24.97812478 | 0.269270746 | 0.001688385 | 92.76211809 |
| MTIF3        | NM_152912    | 98.2033481  | 6.425564023 | 3.58E-08    | 15.28322615 |
| EIF3D        | NM_003753    | 118.2033481 | 5.719825828 | 2.95E-10    | 20.66555026 |
| CLASRP       | NM_007056    | 155.611328  | 4.09793857  | 5.17E-15    | 37.97307483 |
| TMC4         | NM_001145303 | 109.6319195 | 11.35553053 | 1.11E-07    | 9.654495601 |
| SMG1P5       | NR_002453    | 188.1003904 | 1.61533743  | 1.75E-20    | 116.4465002 |
| USP10        | NR_073577    | 180.2651227 | 2.763303245 | 2.84E-18    | 65.23537476 |

|           |              |             |             |             |             |
|-----------|--------------|-------------|-------------|-------------|-------------|
| CRB3      | NM_174881    | 113.0193079 | 1.729934607 | 1.73E-13    | 65.3315492  |
| MADD      | NM_003682    | 106.5096539 | 1.710293804 | 7.53E-11    | 62.27564744 |
| CAPN1     | NM_001198868 | 89.36679679 | 2.424022666 | 3.72E-09    | 36.86714569 |
| PSMC3IP   | NM_001256016 | 101.5907364 | 12.70458605 | 4.03E-07    | 7.996383043 |
| CCDC61    | NM_001267723 | 175.0810825 | 2.13595122  | 1.57E-19    | 81.96867083 |
| ZNF619    | NM_001145083 | 78.46847084 | 0.824048148 | 2.98E-10    | 95.22316269 |
| DHRS4L1   | NR_102689    | 146.7747767 | 2.083777142 | 7.24E-17    | 70.43688775 |
| PRPF3     | NM_004698    | 113.0193079 | 1.32333266  | 4.62E-13    | 85.40506202 |
| SECISBP2L | NM_014701    | 60.79536822 | 0.599043779 | 2.10E-07    | 101.4873543 |
| SLC35A3   | NM_012243    | 198.9987163 | 1.099170622 | 1.96E-23    | 181.0444277 |
| TRMT10B   | NM_001286953 | 107.0398994 | 3.89598438  | 6.52E-10    | 27.47441698 |
| TMEM126B  | NM_001256547 | 97.93822536 | 1.687809728 | 1.05E-11    | 58.0268165  |
| LSM4      | NM_001252129 | 89.89704227 | 9.819340789 | 2.53E-06    | 9.155099533 |
| DISC1     | NM_001164539 | 35.61132799 | 0.176871407 | 0.000386263 | 201.3402202 |
| HEATR5B   | NM_019024    | 81.59073644 | 0.371407199 | 2.52E-10    | 219.680008  |
| ZSCAN22   | NM_181846    | 203.6525111 | 1.799645913 | 1.23E-25    | 113.1625447 |
| PDK4      | NM_002612    | 26.50965393 | 0.453755548 | 0.001095033 | 58.42276542 |
| IDS       | NM_006123    | 160.2651227 | 1.641197074 | 4.48E-19    | 97.65135785 |
| MON1B     | NM_014940    | 84.18275656 | 7.832077491 | 3.10E-06    | 10.74845808 |
| PPCDC     | NR_125369    | 146.7747767 | 4.839205589 | 4.69E-14    | 30.33034533 |
| FAM46C    | NM_017709    | 194.8159598 | 2.286546751 | 4.21E-22    | 85.2009519  |
| C11orf49  | NR_103471    | 89.10167405 | 0.341380063 | 2.50E-10    | 261.0043284 |
| IKBIP     | NM_201612    | 40.32433002 | 0.556228365 | 3.23E-05    | 72.49599732 |
| ARHGAP29  | NM_004815    | 175.0810825 | 2.933554688 | 9.08E-18    | 59.68222894 |
| LINGO1    | NM_001301187 | 34.81595977 | 0.748434682 | 0.000634716 | 46.51836776 |
| LOXL3     | NM_001289165 | 56.67181894 | 6.084190931 | 0.000103621 | 9.314602317 |
| EPHB3     | NM_004443    | 123.3873883 | 2.938742778 | 1.69E-12    | 41.98645395 |
| CFL2      | NR_028131    | 110.6924105 | 6.838885287 | 7.32E-10    | 16.18573873 |
| PARP14    | NM_017554    | 87.03989941 | 0.071236796 | 3.59E-14    | 1221.839049 |
| IST1      | NM_001270979 | 106.2445312 | 2.709090875 | 6.18E-11    | 39.21778046 |
| THTPA     | NM_001256321 | 89.89704227 | 18.0218436  | 0.000206398 | 4.988226747 |
| ZNF480    | NM_001297625 | 72.75418513 | 0.879660425 | 4.47E-08    | 82.70712546 |
| TTLL4     | NM_014640    | 155.0810825 | 0.637490701 | 1.54E-19    | 243.2679915 |
| MAPT      | NM_016835    | 87.83526763 | 3.986778419 | 2.59E-08    | 22.03164019 |
| CLPX      | NM_006660    | 95.87645073 | 2.221068806 | 3.98E-10    | 43.16680801 |
| UBA52     | NM_001033930 | 123.6525111 | 13.92612026 | 1.74E-08    | 8.879178753 |
| IBTK      | NM_015525    | 116.6718189 | 0.929766541 | 1.37E-12    | 125.4850694 |
| NUP210    | NM_024923    | 37.67310262 | 1.526019232 | 0.002284859 | 24.6871742  |
| SEC16A    | NM_014866    | 117.6731026 | 2.625600744 | 4.56E-12    | 44.8175919  |
| RPS27L    | NM_015920    | 177.9382254 | 3.984329828 | 1.39E-19    | 44.6595119  |
| CCDC9     | NM_015603    | 52.22393965 | 3.565145896 | 0.000248575 | 14.64847195 |
| TCERG1    | NM_001040006 | 77.67310262 | 0.488802635 | 8.48E-10    | 158.9048363 |
| STIM1     | NM_001277962 | 69.10167405 | 0.414723043 | 8.00E-08    | 166.6212554 |
| TK1       | NM_003258    | 106.7747767 | 13.62373272 | 9.89E-07    | 7.837409823 |
| MYEOV     | NM_001300923 | 115.3462052 | 26.22383937 | 6.07E-05    | 4.398524702 |
| MRI1      | NM_001031727 | 40.53024548 | 3.573890299 | 0.002742831 | 11.34065181 |
| ETV4      | NM_001986    | 69.10167405 | 7.214398442 | 4.03E-05    | 9.578300202 |
| MALL      | NM_005434    | 55.61132799 | 12.19489553 | 0.003419185 | 4.560213561 |
| MGRN1     | NR_102267    | 152.7541851 | 0.914255761 | 3.34E-17    | 167.0803638 |
| CNOT7     | NM_013354    | 109.3667968 | 4.958306151 | 2.39E-10    | 22.05729002 |
| MIEF1     | NM_019008    | 69.63191953 | 5.330742692 | 5.80E-06    | 13.06232988 |
| GOLM1     | NM_177937    | 55.34620525 | 2.469033175 | 4.68E-05    | 22.41614483 |
| ATP5S     | NM_001003803 | 109.3667968 | 4.919348577 | 9.15E-10    | 22.23196732 |
| DYSF      | NM_001130982 | 55.34620525 | 0.545643877 | 3.82E-06    | 101.4328348 |
| NUDT16    | NM_001171906 | 89.36679679 | 8.605329816 | 2.53E-05    | 10.3850519  |
| SLC35A1   | NM_006416    | 158.9987163 | 2.489513727 | 2.73E-17    | 63.86737884 |
| ZDHHC4    | NM_018106    | 212.2239396 | 4.59503693  | 3.17E-22    | 46.18546986 |
| C6orf203  | NM_001142470 | 166.2445312 | 4.322915154 | 9.15E-17    | 38.45657971 |
| ADCK4     | NM_024876    | 107.8352676 | 6.075581979 | 4.96E-09    | 17.748961   |
| KIRREL    | NM_001286349 | 51.95881691 | 2.141715881 | 9.71E-05    | 24.26036869 |
| PPP1R3D   | NM_006242    | 80.26512274 | 2.172695649 | 3.55E-09    | 36.9426444  |
| TOM1L2    | NM_001288786 | 60.79536822 | 1.192259548 | 1.04E-06    | 50.99172266 |
| PGF       | NM_002632    | 124.1827566 | 1.753633642 | 3.04E-14    | 70.8145382  |
| APOBEC3G  | NM_021822    | 34.81595977 | 2.652990308 | 0.002284859 | 13.12328947 |

|              |              |             |             |             |             |
|--------------|--------------|-------------|-------------|-------------|-------------|
| TM7SF2       | NR_102367    | 237.1428571 | 28.89947301 | 1.99E-14    | 8.205784826 |
| LRRC8E       | NM_001268285 | 160.7953682 | 7.182604509 | 2.59E-14    | 22.38677739 |
| LINC00491    | NR_103755    | 35.08108251 | 0.885564402 | 0.000461911 | 39.61437746 |
| C1orf109     | NM_017850    | 78.99871632 | 2.768736319 | 2.50E-08    | 28.53240873 |
| FYCO1        | NM_024513    | 89.10167405 | 2.124793556 | 1.20E-08    | 41.93427347 |
| NELFA        | NM_005663    | 81.3256137  | 10.46627095 | 2.14E-05    | 7.770256866 |
| IL17RD       | NM_017563    | 98.73359358 | 1.478421064 | 3.87E-10    | 66.78313505 |
| GUCD1        | NM_001284252 | 136.4066962 | 9.742843972 | 3.09E-11    | 14.00070622 |
| MIER3        | NM_001297598 | 40.53024548 | 2.581887164 | 0.000989936 | 15.69791509 |
| PLA1A        | NM_001206961 | 26.50965393 | 0.433480378 | 0.002268597 | 61.1553724  |
| SARNP        | NM_033082    | 61.85585918 | 2.537256467 | 5.72E-06    | 24.37903302 |
| EXD2         | NR_034164    | 139.2638391 | 1.519960555 | 3.15E-15    | 91.62332444 |
| RAF1         | NM_002880    | 75.87645073 | 1.904818248 | 1.82E-07    | 39.83395833 |
| FAM104B      | NM_001166704 | 51.95881691 | 0.861008599 | 5.81E-06    | 60.34645525 |
| IL1RAP       | NM_001167929 | 109.3667968 | 0.209174861 | 2.89E-14    | 522.8486657 |
| SEC14L4      | NM_001161368 | 190.162165  | 2.769862583 | 4.72E-22    | 68.65400695 |
| CWC27        | NM_001297645 | 47.57014489 | 0.175107022 | 3.55E-07    | 271.6632631 |
| TCAIM        | NM_001029840 | 173.8146761 | 5.168964433 | 1.43E-16    | 33.62659549 |
| GTF2F1       | NM_002096    | 58.46847084 | 1.354611693 | 1.81E-06    | 43.16253223 |
| EXTL3        | NR_073468    | 75.34620525 | 2.28328943  | 2.91E-07    | 32.99897256 |
| SMIM14       | NM_174921    | 137.9382254 | 1.743854251 | 5.46E-14    | 79.09962963 |
| RNF41        | NR_040053    | 125.9794085 | 3.258308047 | 8.51E-13    | 38.66405712 |
| CANT1        | NM_001159773 | 92.48906239 | 3.618637604 | 1.14E-08    | 25.55908397 |
| RGS20        | NR_104579    | 72.48906239 | 1.791276152 | 6.84E-07    | 40.467832   |
| KDM8         | NM_001145348 | 95.34620525 | 0.628361703 | 1.26E-12    | 151.7377726 |
| HELQ         | NM_001297757 | 83.91763382 | 0.783116793 | 2.52E-10    | 107.1585166 |
| ZNF317       | NM_001190791 | 107.0398994 | 1.359099992 | 1.97E-12    | 78.75792808 |
| IP6K2        | NM_001146178 | 101.060491  | 4.637035917 | 3.50E-09    | 21.7942006  |
| NDUFV2-AS1   | NR_110772    | 60.79536822 | 4.931267432 | 4.18E-05    | 12.3285482  |
| UBR5         | NM_015902    | 79.5289618  | 1.323212259 | 1.18E-07    | 60.10295118 |
| RASAL2-AS1   | NR_027982    | 95.87645073 | 11.91828151 | 1.92E-06    | 8.044486166 |
| TRAPPC5      | NM_174894    | 106.2445312 | 5.406442811 | 4.19E-09    | 19.65146676 |
| RNF32        | NM_001184996 | 149.3667968 | 3.660162863 | 2.36E-14    | 40.8087843  |
| ACY1         | NM_001198897 | 122.3861047 | 17.83857747 | 1.22E-07    | 6.860754723 |
| SERF1B       | NM_022978    | 323.9176338 | 8.08973999  | 2.01E-31    | 40.04054941 |
| ZSCAN16-AS1  | NR_103456    | 69.36679679 | 8.466434267 | 4.05E-05    | 8.193153647 |
| DHX15        | NM_001358    | 105.2432475 | 2.127974581 | 1.04E-10    | 49.45700408 |
| C9orf72      | NM_018325    | 106.5096539 | 0.318467479 | 4.65E-15    | 334.4443653 |
| TM9SF1       | NM_001014842 | 110.162165  | 7.570707478 | 2.95E-09    | 14.55110574 |
| SBDSP1       | NR_024111    | 93.28443061 | 5.644450251 | 1.41E-08    | 16.5267522  |
| TPGS2        | NM_001271953 | 112.2239396 | 2.479414788 | 1.72E-11    | 45.26226923 |
| AMOT         | NM_133265    | 48.57142857 | 0.984516232 | 1.12E-05    | 49.33532528 |
| STAT4        | NM_003151    | 49.89704227 | 0.196444538 | 3.64E-06    | 254.0006593 |
| HNRNPA1P10   | NR_002944    | 138.4684708 | 21.60115951 | 1.03E-07    | 6.410233247 |
| CYB561A3     | NM_001161454 | 92.48906239 | 12.19677777 | 5.14E-06    | 7.58307351  |
| NR4A1        | NM_002135    | 177.6731026 | 4.472533512 | 6.79E-19    | 39.72538208 |
| MMADHC       | NM_015702    | 106.7747767 | 2.266233264 | 5.66E-12    | 47.11552794 |
| ITM2C        | NM_001012514 | 135.611328  | 2.725004497 | 8.22E-15    | 49.76554281 |
| SRSF10       | NM_001300936 | 141.5907364 | 13.50538838 | 4.35E-10    | 10.48401812 |
| LOC100289092 | NR_046288    | 147.0398994 | 2.065017825 | 3.55E-12    | 71.20514778 |
| MOV10        | NM_001286072 | 78.46847084 | 4.370926076 | 1.02E-06    | 17.95236741 |
| 6-Sep        | NM_145799    | 43.1222656  | 0.795289532 | 4.95E-05    | 54.22209633 |
| UNG          | NM_080911    | 46.77477667 | 4.13517806  | 0.000969924 | 11.31142988 |
| RBM5         | NM_005778    | 70.42728775 | 3.445321305 | 5.17E-07    | 20.44142811 |
| PPP1R3F      | NM_033215    | 54.28571429 | 3.476116296 | 0.000139895 | 15.61677161 |
| AHSA2        | NM_152392    | 117.6731026 | 7.618576065 | 7.90E-10    | 15.44555067 |
| CAPG         | NM_001747    | 47.30502215 | 3.678100313 | 0.000519271 | 12.86126482 |
| IFI35        | NM_005533    | 66.77477667 | 7.273740574 | 3.47E-05    | 9.180252717 |
| HES6         | NM_018645    | 214.8159598 | 24.59800991 | 1.52E-12    | 8.733062576 |
| HARS         | NM_001289093 | 115.611328  | 6.49113609  | 7.45E-10    | 17.81064614 |
| USH1G        | NM_173477    | 117.9382254 | 4.575066022 | 5.46E-12    | 25.77847506 |
| ZNF138       | NM_001160183 | 95.61132799 | 1.341845332 | 3.39E-10    | 71.25361299 |
| CXorf57      | NM_018015    | 60.79536822 | 0.235020645 | 4.14E-08    | 258.6809695 |
| 2-Sep        | NM_001008491 | 115.8764507 | 6.052885238 | 1.69E-10    | 19.1440026  |

|               |              |             |             |             |             |
|---------------|--------------|-------------|-------------|-------------|-------------|
| PSMB1         | NM_002793    | 104.1827566 | 4.06901795  | 7.26E-10    | 25.60390685 |
| LOC100287015  | NR_040040    | 166.5096539 | 10.864693   | 2.23E-13    | 15.32575784 |
| ANAPC15       | NM_001278491 | 75.87645073 | 12.46015973 | 0.00012077  | 6.089524725 |
| FANCA         | NM_001286167 | 104.9781248 | 3.813016013 | 3.43E-10    | 27.53151952 |
| PGK1          | NM_000291    | 75.34620525 | 2.804930467 | 1.30E-07    | 26.86205813 |
| ATAD2         | NM_014109    | 168.6306359 | 1.1946045   | 1.89E-18    | 141.1602215 |
| MLLT11        | NM_006818    | 35.34620525 | 1.249761527 | 0.000995503 | 28.28235986 |
| NUDT22        | NM_001128613 | 135.8764507 | 26.1716706  | 9.53E-07    | 5.191737769 |
| LOC101928736  | NR_110941    | 153.0193079 | 9.606324435 | 9.03E-13    | 15.92901727 |
| CCT6A         | NM_001009186 | 118.4684708 | 8.894033925 | 1.89E-09    | 13.31999314 |
| YEATS2        | NM_018023    | 121.3256137 | 1.207796204 | 3.47E-12    | 100.4520575 |
| SH3YL1        | NM_015677    | 72.48906239 | 0.733195783 | 5.89E-09    | 98.8672658  |
| UNC5A         | NM_133369    | 29.10167405 | 0.01263346  | 5.89E-05    | 2303.53948  |
| BRCC3         | NM_001018055 | 51.69369417 | 1.856571651 | 6.79E-05    | 27.84363003 |
| THADA         | NR_073394    | 117.9382254 | 0.308072326 | 2.37E-13    | 382.8264192 |
| PGAP2         | NR_027017    | 123.3873883 | 7.168784985 | 2.64E-10    | 17.21175744 |
| APP           | NM_201414    | 120.7953682 | 0.984130496 | 5.94E-13    | 122.7432426 |
| DCAF8         | NR_028103    | 121.5907364 | 2.716340198 | 1.36E-12    | 44.76270555 |
| GABPB2        | NM_144618    | 58.2033481  | 0.552077262 | 2.94E-07    | 105.4260918 |
| DOPEY1        | NM_001199942 | 44.4478793  | 0.693481239 | 2.54E-05    | 64.09384532 |
| RHPN1-AS1     | NR_026785    | 116.9369417 | 14.32601194 | 2.88E-07    | 8.162560675 |
| ESCO2         | NM_001017420 | 130.4272878 | 1.207734825 | 1.15E-15    | 107.9933153 |
| NCBP2         | NM_007362    | 81.59073644 | 11.21151841 | 1.47E-05    | 7.277402888 |
| HDAC8         | NM_001166419 | 75.34620525 | 0.856947573 | 1.46E-08    | 87.92393793 |
| PIK3R4        | NM_014602    | 89.10167405 | 0.113969663 | 1.41E-13    | 781.8016781 |
| TNIK          | NM_001161565 | 69.10167405 | 1.015328787 | 1.92E-07    | 68.05842101 |
| ABHD11        | NM_148912    | 118.2033481 | 12.86048142 | 6.72E-08    | 9.191207097 |
| PDLIM3        | NM_001257963 | 114.8159598 | 1.063286985 | 2.77E-13    | 107.9820983 |
| PLCG2         | NM_002661    | 163.9176338 | 0.547120753 | 5.64E-19    | 299.6004684 |
| RAD50         | NM_005732    | 155.0810825 | 1.522236215 | 4.29E-16    | 101.8771469 |
| CD81-AS1      | NR_108080    | 32.75418513 | 0.106487354 | 0.000114198 | 307.5875563 |
| HOXC4         | NM_014620    | 43.65251108 | 5.927993978 | 0.003003631 | 7.3637914   |
| WDR20         | NM_001242417 | 87.03989941 | 1.365933551 | 1.23E-08    | 63.72191337 |
| CIPC          | NM_033426    | 106.5096539 | 0.43993108  | 4.65E-15    | 242.105318  |
| CKMT2-AS1     | NR_034122    | 84.18275656 | 0.739500108 | 4.33E-10    | 113.8373824 |
| CBWD5         | NM_001286836 | 174.0797988 | 17.96428467 | 3.19E-12    | 9.690327335 |
| TSC1          | NM_001162426 | 86.77477667 | 0.799021343 | 1.38E-10    | 108.6013251 |
| REV1          | NM_001037872 | 97.14285714 | 1.558119476 | 1.15E-09    | 62.3462184  |
| STAMBP        | NM_006463    | 107.0398994 | 1.280850499 | 1.04E-11    | 83.56939353 |
| FAM114A1      | NM_138389    | 71.95881691 | 0.67536176  | 1.49E-08    | 106.5485509 |
| PRDX6         | NM_004905    | 121.3256137 | 3.133538683 | 4.45E-13    | 38.71840304 |
| PMS2P5        | NR_027777    | 180.7953682 | 0.406290279 | 2.90E-26    | 444.9906321 |
| ZNF670-ZNF695 | NR_037894    | 123.9176338 | 0.373415529 | 3.29E-15    | 331.8491713 |
| CDC42EP3      | NM_006449    | 47.83526763 | 6.180463762 | 0.00087356  | 7.739753759 |
| SH3BP5L       | NM_030645    | 49.10167405 | 1.373960306 | 3.19E-05    | 35.73733086 |
| ZBTB24        | NM_001164313 | 115.0810825 | 14.10535468 | 2.89E-07    | 8.158680525 |
| C21orf33      | NM_198155    | 134.8159598 | 11.54100739 | 2.70E-10    | 11.68147245 |
| WDR47         | NM_014969    | 64.71300204 | 1.334041578 | 2.02E-06    | 48.50898436 |
| SPOP          | NM_001007229 | 38.46847084 | 0.776032871 | 0.000225777 | 49.5706719  |
| PPIA          | NM_021130    | 169.1016741 | 15.62983928 | 2.52E-12    | 10.8191563  |
| TGOLN2        | NM_001206840 | 220         | 7.597256799 | 4.18E-21    | 28.95782067 |
| CHCHD2        | NM_016139    | 129.1016741 | 7.460459766 | 5.66E-11    | 17.30478792 |
| API3          | NM_001039569 | 77.67310262 | 2.702946469 | 2.39E-07    | 28.73645613 |
| VWA8          | NM_015058    | 126.7747767 | 0.200872445 | 8.20E-15    | 631.1207923 |
| GINS1         | NM_021067    | 146.2445312 | 0.631085361 | 1.69E-18    | 231.7349446 |
| SON           | NM_032195    | 113.0193079 | 3.11923261  | 1.32E-11    | 36.23304896 |
| CDK18         | NM_212503    | 77.67310262 | 6.097053901 | 1.45E-06    | 12.73944825 |
| KLHL11        | NM_014851    | 212.2239396 | 6.444200994 | 5.79E-21    | 32.93254506 |
| LRRC16A       | NM_017640    | 138.4684708 | 0.919967271 | 1.05E-14    | 150.514562  |
| CAST          | NM_173060    | 90.16216501 | 0.738961384 | 4.69E-11    | 122.0120116 |
| GOPC          | NM_020399    | 147.8352676 | 1.460799397 | 8.58E-17    | 101.2016215 |
| AP2M1         | NM_001025205 | 163.6525111 | 6.969420184 | 1.67E-15    | 23.48151019 |
| PRMT2         | NM_001286676 | 124.4478793 | 0.980639829 | 2.40E-15    | 126.9047775 |
| COPS4         | NM_016129    | 47.03989941 | 0.588844959 | 8.70E-06    | 79.88503368 |

|           |              |             |             |             |             |
|-----------|--------------|-------------|-------------|-------------|-------------|
| ABI1      | NM_001178124 | 117.6731026 | 0.70735131  | 9.91E-14    | 166.3573686 |
| ANKRD46   | NM_001270377 | 182.6512274 | 1.718541989 | 5.60E-21    | 106.2826678 |
| ZFYVE19   | NM_001077268 | 129.1016741 | 7.129055456 | 1.04E-11    | 18.10922567 |
| CCNG1     | NM_004060    | 182.6512274 | 4.988054297 | 1.09E-18    | 36.61773039 |
| GPR63     | NM_001143957 | 121.3256137 | 1.214057071 | 1.94E-13    | 99.93402834 |
| TCEB3-AS1 | NR_038280    | 123.6525111 | 4.563935761 | 4.40E-12    | 27.09339429 |
| LEMD3     | NM_014319    | 98.99871632 | 0.887450247 | 8.25E-12    | 111.5541031 |
| LRRC27    | NM_001143758 | 49.10167405 | 0.927988831 | 2.75E-05    | 52.91192351 |
| DUSP3     | NM_004090    | 172.4890624 | 7.251613425 | 1.04E-15    | 23.78630138 |
| CENPK     | NM_022145    | 80          | 0.12030925  | 7.31E-13    | 664.9530292 |
| HMGXB4    | NM_001003681 | 63.1222656  | 0.845340914 | 7.57E-08    | 74.67078024 |
| FAM76A    | NM_001143913 | 81.3256137  | 0.940054256 | 7.23E-09    | 86.51161693 |
| INTS2     | NR_026641    | 170.9575332 | 1.48429467  | 9.29E-19    | 115.1776239 |
| KBTBD3    | NM_152433    | 80.26512274 | 1.176986866 | 5.67E-09    | 68.19542774 |
| IRAK4     | NM_016123    | 152.4890624 | 0.806825087 | 1.47E-19    | 188.9989105 |
| NFYA      | NM_002505    | 115.3462052 | 2.837906135 | 4.56E-12    | 40.64482747 |
| RTFDC1    | NM_001283035 | 36.14157347 | 1.198644661 | 0.001707128 | 30.15203307 |
| PIK3R2    | NM_005027    | 131.6936942 | 8.153855273 | 1.06E-10    | 16.15109537 |
| ZBTB5     | NM_014872    | 66.24453119 | 4.898431878 | 1.68E-05    | 13.52361998 |
| LINC01024 | NR_102741    | 180.2651227 | 11.12509367 | 6.82E-15    | 16.20347011 |
| DNAJC19   | NR_046073    | 112.7541851 | 7.175792691 | 2.95E-09    | 15.71313303 |
| SLC25A10  | NM_001270888 | 117.9382254 | 6.653815299 | 3.33E-10    | 17.72490219 |
| TGM2      | NM_198951    | 58.46847084 | 0.382025022 | 3.53E-08    | 153.0487991 |
| SRP14-AS1 | NR_040061    | 69.36679679 | 2.6460782   | 3.69E-07    | 26.21494587 |
| RAP2B     | NM_002886    | 124.713002  | 7.064832496 | 3.46E-11    | 17.65264811 |
| ARHGAP12  | NM_001270696 | 126.2445312 | 1.137826114 | 8.26E-13    | 110.9523939 |
| RTN3      | NM_201429    | 136.6718189 | 1.336578655 | 1.85E-14    | 102.2549765 |
| LONRF3    | NR_110311    | 65.97940845 | 0.047761826 | 2.21E-11    | 1381.425594 |
| LOC647323 | NR_033944    | 41.3256137  | 0.585439623 | 5.57E-05    | 70.58902763 |
| ANKMY2    | NM_020319    | 95.87645073 | 1.253219039 | 1.92E-10    | 76.50414473 |
| TMEM136   | NM_001198672 | 109.3667968 | 6.787989942 | 3.30E-09    | 16.1118089  |
| RASSF1    | NM_007182    | 160.2651227 | 25.74575701 | 3.46E-09    | 6.22491398  |
| TMPPE     | NM_001136238 | 37.93822536 | 2.373732008 | 0.000553378 | 15.98252256 |
| HSP90AB1  | NM_001271971 | 98.73359358 | 23.10817881 | 6.72E-05    | 4.272668755 |
| TMEM231   | NR_074083    | 71.48777871 | 1.445910273 | 4.92E-08    | 49.44136579 |
| ZNF562    | NM_001300885 | 85.773493   | 0.307758672 | 8.38E-12    | 278.7037407 |
| BAIAP3    | NM_001199099 | 124.9781248 | 3.781164889 | 7.07E-13    | 33.05281003 |
| METTL14   | NM_020961    | 89.89704227 | 0.963385824 | 1.77E-10    | 93.31364449 |
| MED7      | NM_001100816 | 78.2033481  | 6.285320712 | 1.99E-06    | 12.4422208  |
| PLEKHG5   | NM_001042664 | 83.65251108 | 8.055146672 | 2.32E-06    | 10.38497677 |
| DDHD1     | NM_001160148 | 132.7541851 | 0.963119732 | 5.07E-15    | 137.8376755 |
| TP73      | NM_001204186 | 89.36679679 | 0.312975876 | 1.29E-11    | 285.5389298 |
| 10-Sep    | NM_178584    | 54.81595977 | 2.019069269 | 4.25E-05    | 27.14912291 |
| C1orf115  | NM_024709    | 58.46847084 | 4.775270868 | 4.52E-05    | 12.24401138 |
| PSMD6     | NM_014814    | 108.5714286 | 3.381293022 | 3.09E-11    | 32.10944094 |
| KIN       | NM_012311    | 78.2033481  | 1.120608099 | 2.62E-08    | 69.78652766 |
| SSFA2     | NM_006751    | 57.67310262 | 9.685017712 | 0.002019796 | 5.954878384 |
| AK2       | NM_001625    | 101.8558592 | 3.892195004 | 1.41E-09    | 26.16925901 |
| RPE       | NM_001278285 | 64.18275656 | 2.288926446 | 1.67E-06    | 28.04055004 |
| R3HCC1    | NM_001136108 | 93.01930787 | 7.499201774 | 1.52E-07    | 12.40389453 |
| ZNF669    | NM_024804    | 135.611328  | 5.746697178 | 2.01E-12    | 23.59813364 |
| DEDD2     | NR_073050    | 87.30502215 | 3.614569832 | 2.75E-08    | 24.15364102 |
| IQCD      | NM_138451    | 49.63191953 | 4.379923329 | 0.000738221 | 11.33168684 |
| PLK2      | NM_006622    | 191.9588169 | 9.385155725 | 6.51E-17    | 20.45345038 |
| C18orf21  | NM_001201475 | 137.9382254 | 0.238325947 | 1.56E-20    | 578.7797213 |
| JARID2    | NM_004973    | 68.83655131 | 1.182335632 | 1.79E-07    | 58.22082111 |
| C3orf52   | NM_024616    | 136.1415735 | 1.804458533 | 1.82E-15    | 75.44732726 |
| TP53I13   | NM_138349    | 72.22393965 | 4.511694995 | 1.11E-06    | 16.00816095 |
| FANCI     | NM_018193    | 58.99871632 | 1.522982802 | 9.29E-06    | 38.73892484 |
| NR2F1-AS1 | NR_109824    | 44.4478793  | 1.154755607 | 4.01E-05    | 38.49115694 |
| DONSON    | NM_017613    | 125.7142857 | 4.783864266 | 3.70E-12    | 26.27881535 |
| DPYD      | NM_001160301 | 63.1222656  | 0.156550964 | 7.12E-08    | 403.205857  |
| NKD1      | NM_033119    | 57.93822536 | 0.752947454 | 1.18E-06    | 76.94856397 |
| DPP8      | NM_017743    | 123.9176338 | 0.627682489 | 2.11E-15    | 197.4208871 |



|              |              |             |             |             |             |
|--------------|--------------|-------------|-------------|-------------|-------------|
| PRDM10       | NM_020228    | 57.93822536 | 1.361792167 | 2.13E-05    | 42.54557101 |
| VRK2         | NM_001288836 | 108.6306359 | 1.899717304 | 1.22E-10    | 57.18252691 |
| SLC26A6      | NM_001281732 | 103.6525111 | 3.493538249 | 6.56E-11    | 29.66977995 |
| MRPL30       | NR_028356    | 135.611328  | 4.173594234 | 1.64E-13    | 32.49269584 |
| KHDRBS1      | NR_073499    | 117.6731026 | 5.181917028 | 1.78E-10    | 22.70841119 |
| C8orf58      | NM_001013842 | 94.28571429 | 8.115533093 | 1.75E-07    | 11.61793233 |
| CBFA2T2      | NM_001032999 | 114.8159598 | 0.607454816 | 3.58E-13    | 189.0115227 |
| PVR          | NM_001135768 | 189.6319195 | 3.996559063 | 8.58E-20    | 47.44879696 |
| ARMCX3       | NM_177948    | 40.26512274 | 3.00896658  | 0.001115905 | 13.38171152 |
| AURKAIP1     | NM_001127229 | 99.26383906 | 12.38007465 | 4.01E-06    | 8.01803235  |
| USP33        | NM_015017    | 117.4079799 | 1.464847349 | 2.87E-12    | 80.15031733 |
| NIPA2        | NM_001008860 | 157.9382254 | 3.169601434 | 6.96E-16    | 49.82904905 |
| RPL13A       | NM_012423    | 178.4684708 | 34.9562925  | 2.05E-08    | 5.105474811 |
| MLXIPL       | NM_032952    | 209.8970423 | 5.94207098  | 1.84E-19    | 35.32388674 |
| ZNF765       | NM_001040185 | 47.03989941 | 0.527217502 | 1.92E-05    | 89.22294726 |
| PTPRU        | NM_005704    | 49.10167405 | 2.061462047 | 0.000176565 | 23.8188591  |
| PON2         | NM_000305    | 158.4684708 | 2.259783822 | 1.17E-17    | 70.12550018 |
| SKAP2        | NM_003930    | 115.0810825 | 0.232693683 | 3.22E-14    | 494.5604071 |
| TPD52        | NM_001025253 | 190.162165  | 1.673980132 | 1.84E-19    | 113.5988184 |
| TSG101       | NM_006292    | 176.1415735 | 0.069282416 | 5.36E-31    | 2542.370543 |
| BCL2L11      | NM_001204108 | 178.2033481 | 3.573468085 | 3.49E-17    | 49.8684594  |
| TMEM25       | NM_001144037 | 81.59073644 | 3.20812134  | 6.52E-08    | 25.43255937 |
| GTF2H2B      | NR_033417    | 155.8764507 | 1.236597929 | 9.04E-19    | 126.0526539 |
| SMUG1        | NM_001243788 | 111.9588169 | 9.046729121 | 1.66E-08    | 12.37561282 |
| ZNF248       | NM_001267597 | 142.1209819 | 0.075410489 | 6.58E-24    | 1884.631487 |
| PDE8A        | NM_001243137 | 119.2638391 | 0.714773179 | 1.13E-13    | 166.8555041 |
| CCDC77       | NM_001130148 | 101.060491  | 1.249124137 | 1.26E-10    | 80.90508216 |
| SLC9A6       | NM_001177651 | 54.55083703 | 0.764723677 | 1.70E-06    | 71.33405001 |
| DTNB         | NM_183360    | 88.83655131 | 0.063435229 | 4.18E-12    | 1400.429262 |
| SLC30A9      | NM_006345    | 130.162165  | 1.149858856 | 1.03E-13    | 113.1983846 |
| MVD          | NM_002461    | 91.48777871 | 0.705391791 | 9.95E-13    | 129.6978217 |
| MRPL52       | NM_181307    | 69.89704227 | 3.15408348  | 1.47E-06    | 22.16080922 |
| HNRNPA2B1    | NM_031243    | 233.2844306 | 10.4480457  | 7.91E-21    | 22.32804462 |
| CANX         | NM_001024649 | 85.24324752 | 2.751350904 | 1.09E-08    | 30.98232486 |
| KRCC1        | NM_016618    | 161.3256137 | 2.734113323 | 1.33E-16    | 59.00472827 |
| NFYC         | NM_014223    | 69.89704227 | 1.92935782  | 1.47E-06    | 36.22813848 |
| MYO5A        | NM_000259    | 109.6319195 | 0.37919711  | 1.20E-12    | 289.1159153 |
| DFFA         | NM_004401    | 87.83526763 | 4.666145599 | 1.76E-08    | 18.82394489 |
| C1QTNF9B-AS1 | NM_001014442 | 51.95881691 | 5.455492202 | 0.000897332 | 9.524129993 |
| BCCIP        | NM_016567    | 82.6512274  | 7.513232807 | 2.54E-06    | 11.00075421 |
| CENPJ        | NR_047594    | 106.2445312 | 1.343900564 | 1.42E-11    | 79.05683951 |
| SCD          | NM_005063    | 110.162165  | 12.25525928 | 9.69E-08    | 8.988970571 |
| GPBP1        | NM_022913    | 94.28571429 | 0.950524768 | 6.43E-11    | 99.19332713 |
| LOC81691     | NM_001199053 | 183.9176338 | 1.538940264 | 5.05E-21    | 119.5092741 |
| RALA         | NM_005402    | 78.46847084 | 0.745366312 | 4.18E-09    | 105.2750434 |
| ADSL         | NM_000026    | 182.6512274 | 4.859881859 | 7.28E-18    | 37.58347069 |
| SHOX2        | NM_006884    | 80.53024548 | 3.205277844 | 5.39E-08    | 25.1242636  |
| KRIT1        | NM_194455    | 93.28443061 | 1.401032942 | 6.11E-10    | 66.58261046 |
| STX17        | NM_017919    | 200.2651227 | 1.411434434 | 3.17E-22    | 141.8876555 |
| STIP1        | NM_001282652 | 153.8146761 | 7.498473477 | 4.34E-13    | 20.51279858 |
| FBXO27       | NM_178820    | 63.1222656  | 11.53623765 | 0.001204423 | 5.471650943 |
| BCDIN3D-AS1  | NR_027499    | 123.9176338 | 3.90158877  | 6.10E-12    | 31.76081363 |
| LYN          | NM_002350    | 63.65251108 | 0.644126992 | 3.13E-07    | 98.81981641 |
| PHKB         | NM_001031835 | 124.4478793 | 0.372104974 | 1.21E-14    | 334.4429342 |
| PCID2        | NM_018386    | 160.5302455 | 0.390783642 | 5.80E-23    | 410.7905968 |
| CRABP2       | NM_001199723 | 84.4478793  | 13.22699016 | 2.62E-05    | 6.384512145 |
| MASTL        | NM_001172303 | 67.30502215 | 4.430864375 | 9.09E-06    | 15.1900434  |
| CD276        | NM_001024736 | 62.85714286 | 4.574322759 | 3.32E-05    | 13.74130033 |
| AGA          | NR_033655    | 93.54955335 | 6.046001923 | 4.08E-08    | 15.47296123 |
| RFWD3        | NM_018124    | 69.89704227 | 3.199773419 | 1.41E-06    | 21.84437243 |
| NDUFV1       | NM_001166102 | 47.03989941 | 1.951425065 | 0.000165225 | 24.10540904 |
| HIGD1A       | NM_001099669 | 135.3462052 | 0.484435728 | 3.02E-19    | 279.3893954 |
| RNF146       | NM_001242852 | 176.6718189 | 3.344536358 | 7.03E-19    | 52.82400908 |
| NFKB1        | NM_001165412 | 40.53024548 | 0.637422954 | 0.000117335 | 63.58454025 |

|              |              |             |             |             |             |
|--------------|--------------|-------------|-------------|-------------|-------------|
| PLOD2        | NM_000935    | 78.46847084 | 0.646805215 | 3.71E-09    | 121.317004  |
| C14orf169    | NM_024644    | 81.06049096 | 6.611183737 | 3.18E-06    | 12.26111604 |
| TRAPPC11     | NM_199053    | 92.22393965 | 0.199067087 | 1.71E-13    | 463.2807017 |
| FBXL4        | NR_103836    | 120.2651227 | 0.413389687 | 9.34E-16    | 290.9243422 |
| EMR2         | NM_001271052 | 197.9382254 | 2.257914205 | 9.55E-22    | 87.66419244 |
| COG6         | NM_001145079 | 112.7541851 | 0.25161201  | 2.28E-14    | 448.1271983 |
| NFE2L2       | NM_006164    | 144.1827566 | 4.704500914 | 1.73E-13    | 30.64783262 |
| YAP1         | NM_006106    | 37.93822536 | 0.816939312 | 0.000277132 | 46.43946592 |
| MDM1         | NM_001205029 | 41.06049096 | 2.962050865 | 0.001860845 | 13.86218294 |
| TMEM230      | NM_001009924 | 83.91763382 | 2.039047895 | 1.41E-09    | 41.15530294 |
| VPS13B       | NM_152564    | 273.8146761 | 0.153852253 | 4.94E-32    | 1779.724837 |
| CSRNP2       | NM_030809    | 158.2033481 | 6.877469697 | 3.70E-14    | 23.0031327  |
| NFAT5        | NM_173215    | 134.550837  | 3.056105097 | 5.43E-13    | 44.02690115 |
| YWHAZ        | NM_001135699 | 89.89704227 | 12.86307778 | 1.64E-05    | 6.988766128 |
| GLIPR2       | NM_001287010 | 82.38610466 | 2.881174829 | 1.87E-08    | 28.59462183 |
| CHIC2        | NM_012110    | 118.7335936 | 1.346241735 | 6.44E-13    | 88.19633986 |
| PSMG3-AS1    | NR_027329    | 186.7747767 | 1.894692428 | 4.53E-22    | 98.57788733 |
| NAA60        | NM_001083600 | 38.2033481  | 2.126267761 | 0.001719583 | 17.96732697 |
| LINC00673    | NR_036488    | 288.3655131 | 3.837146783 | 8.03E-27    | 75.15102481 |
| EXOSC3       | NM_016042    | 121.5907364 | 8.95117409  | 8.48E-10    | 13.58377518 |
| ARL13B       | NM_001174150 | 117.9382254 | 0.314674243 | 6.85E-16    | 374.794658  |
| TMEM168      | NM_001287497 | 97.93822536 | 0.642982253 | 3.55E-12    | 152.318707  |
| RNF4         | NM_002938    | 120.5302455 | 4.034377834 | 6.29E-11    | 29.87579509 |
| TOMM40       | NM_006114    | 89.36679679 | 6.101460316 | 1.97E-07    | 14.64678817 |
| CHMP1A       | NM_002768    | 127.5701449 | 3.550052134 | 1.12E-13    | 35.93472435 |
| LOC100507564 | NR_038953    | 75.34620525 | 7.23233147  | 5.57E-06    | 10.41796903 |
| CTDNEP1      | NM_015343    | 89.63191953 | 3.390043269 | 2.59E-09    | 26.43975679 |
| LTV1         | NM_032860    | 83.38738834 | 2.021491563 | 4.99E-09    | 41.25042611 |
| ACAD8        | NM_014384    | 130.9575332 | 0.320252534 | 9.55E-21    | 408.9195851 |
| TSPAN10      | NM_001290212 | 111.9588169 | 2.728164916 | 3.76E-12    | 41.03814115 |
| INSIG1       | NM_005542    | 123.6525111 | 4.350540447 | 8.86E-12    | 28.4223334  |
| SH3GLB2      | NM_020145    | 40.53024548 | 0.259644985 | 4.63E-06    | 156.0987035 |
| LOC102606465 | NR_109849    | 128.6306359 | 0.21221698  | 4.16E-19    | 606.1279161 |
| CAAP1        | NM_024828    | 127.3050222 | 0.461026028 | 1.37E-17    | 276.1341323 |
| ARID1B       | NM_017519    | 49.36679679 | 0.887287559 | 2.31E-05    | 55.63787781 |
| ROR1         | NM_005012    | 127.0398994 | 0.113456062 | 9.59E-16    | 1119.727733 |
| TMEM143      | NM_018273    | 63.65251108 | 5.226955879 | 3.64E-05    | 12.17774027 |
| FOS          | NM_005252    | 216.1415735 | 19.78242696 | 4.64E-15    | 10.92593815 |
| LOC148709    | NR_002929    | 58.99871632 | 1.152447313 | 4.89E-07    | 51.19428509 |
| TRIM7        | NM_203295    | 67.03989941 | 4.019502522 | 4.78E-06    | 16.67865589 |
| LOC101929231 | NR_110240    | 71.95881691 | 0.187531203 | 1.34E-08    | 383.7164994 |
| GLB1L        | NM_001286423 | 78.2033481  | 3.02849064  | 7.36E-08    | 25.82254905 |
| UBE3D        | NM_198920    | 139.5289618 | 0.583586331 | 3.43E-16    | 239.0888108 |
| CPNE1        | NM_152925    | 146.5096539 | 6.08584688  | 1.62E-12    | 24.07383177 |
| C1orf27      | NM_001164246 | 44.4478793  | 0.813879743 | 1.47E-05    | 54.61234253 |
| UBE3B        | NM_001270449 | 215.8764507 | 1.20350271  | 3.28E-30    | 179.3734645 |
| RNF7         | NM_183237    | 79.26383906 | 5.748865812 | 7.97E-07    | 13.78773512 |
| TOMM5        | NM_001001790 | 115.0810825 | 0.748916762 | 4.02E-15    | 153.663382  |
| CDK11B       | NM_033486    | 86.77477667 | 5.08863536  | 3.51E-07    | 17.05266157 |
| ABCC3        | NM_001144070 | 81.59073644 | 6.87030028  | 2.55E-06    | 11.87586177 |
| SCP2         | NM_001193617 | 83.65251108 | 0.380355128 | 4.33E-10    | 219.9326493 |
| PAPOLA       | NM_001252007 | 112.2239396 | 1.02407112  | 4.73E-13    | 109.5860799 |
| UBE2F        | NR_103500    | 38.2033481  | 0.145198648 | 4.52E-05    | 263.1109072 |
| DUS3L        | NM_001161619 | 75.61132799 | 1.433733818 | 5.69E-09    | 52.73735405 |
| SGSM1        | NM_001098497 | 226.5096539 | 0.593011349 | 5.13E-28    | 381.9651249 |
| TMOD1        | NM_001166116 | 47.03989941 | 1.547274892 | 0.000323004 | 30.40177259 |
| NOP16        | NM_001291307 | 81.85585918 | 7.045474014 | 7.49E-07    | 11.61821888 |
| LMBR1        | NM_022458    | 151.9588169 | 1.013702103 | 1.47E-16    | 149.9048059 |
| NCEH1        | NM_001146276 | 106.2445312 | 1.57333767  | 1.11E-10    | 67.52811757 |
| RUFY2        | NM_001278225 | 84.97812478 | 2.250757406 | 6.63E-09    | 37.75534606 |
| GPN3         | NM_016301    | 90.69241049 | 0.832948837 | 6.83E-12    | 108.8811298 |
| GULP1        | NR_045562    | 120.5302455 | 0.478305837 | 1.99E-13    | 251.9940928 |
| USP19        | NM_001199162 | 73.01930787 | 4.277922172 | 7.76E-07    | 17.06887244 |
| TMEM106A     | NM_001291586 | 60.53024548 | 4.321388312 | 1.65E-05    | 14.00712945 |

|              |              |             |             |             |             |
|--------------|--------------|-------------|-------------|-------------|-------------|
| TRIM41       | NM_033549    | 109.8970423 | 15.38278367 | 5.87E-07    | 7.144158339 |
| CTTNBP2NL    | NM_018704    | 103.6525111 | 0.125528471 | 5.85E-16    | 825.7291002 |
| ZMYND8       | NM_001281781 | 46.50965393 | 2.570203195 | 0.000387419 | 18.09571089 |
| ATG12        | NR_073603    | 91.95881691 | 8.007252255 | 8.40E-07    | 11.4844411  |
| LINC00173    | NR_027345    | 100         | 15.78204246 | 1.01E-05    | 6.336315484 |
| ZNF7         | NM_001282797 | 135.611328  | 7.89943697  | 3.87E-11    | 17.16721438 |
| TAF9B        | NM_015975    | 74.55083703 | 5.604120535 | 4.19E-06    | 13.30286109 |
| MKLN1        | NM_013255    | 126.5096539 | 0.236792459 | 5.03E-16    | 534.2638622 |
| SLC22A5      | NM_003060    | 132.2239396 | 4.026805851 | 9.61E-13    | 32.83593611 |
| TSPAN3       | NM_001168412 | 101.5907364 | 1.127952447 | 4.26E-12    | 90.06650654 |
| RNF111       | NM_001270528 | 136.1415735 | 1.044557127 | 2.46E-14    | 130.3342536 |
| ARAF         | NM_001256197 | 66.24453119 | 4.111174315 | 5.92E-06    | 16.11328689 |
| C21orf67     | NR_027129    | 186.5096539 | 7.206287753 | 1.59E-17    | 25.8815163  |
| ZNF219       | NM_001102454 | 63.65251108 | 7.835104064 | 0.00012883  | 8.124016038 |
| C14orf178    | NM_174943    | 50.42728775 | 2.068663621 | 1.05E-05    | 24.37674605 |
| LPCAT1       | NM_024830    | 69.10167405 | 2.992485895 | 1.65E-06    | 23.09172924 |
| METTL9       | NM_016025    | 80.79536822 | 0.72906596  | 7.69E-10    | 110.820382  |
| RABEP1       | NM_001291581 | 140.7953682 | 1.623551959 | 3.37E-14    | 86.72058041 |
| BMS1P6       | NR_024495    | 155.3462052 | 1.174913834 | 2.20E-20    | 132.2192324 |
| RPS10        | NM_001203245 | 87.83526763 | 10.58556029 | 4.87E-06    | 8.297649365 |
| FPGT         | NM_001199328 | 104.1827566 | 1.876774808 | 7.41E-12    | 55.51159155 |
| RHOD         | NM_014578    | 117.6731026 | 5.734953775 | 1.83E-10    | 20.51857909 |
| PFKP         | NM_002627    | 155.0810825 | 3.996940745 | 3.41E-14    | 38.79994536 |
| ACP1         | NM_007099    | 137.4079799 | 2.251738691 | 9.57E-16    | 61.02305761 |
| ACTR6        | NR_048569    | 39.5289618  | 0.091492359 | 1.05E-06    | 432.0465927 |
| IFT20        | NM_174887    | 34.34492157 | 0.582884181 | 0.000279437 | 58.92237716 |
| SMARCA5      | NM_003601    | 89.89704227 | 2.066596993 | 5.29E-09    | 43.50003535 |
| GPR89A       | NM_001097613 | 157.6731026 | 1.125504837 | 1.36E-17    | 140.091004  |
| PPARD        | NM_001171818 | 130.162165  | 2.582001233 | 4.78E-13    | 50.4113489  |
| ST3GAL4      | NM_001254757 | 54.81595977 | 0.87637588  | 1.87E-06    | 62.54845786 |
| RNF166       | NM_178841    | 127.5701449 | 2.087536568 | 1.73E-15    | 61.11037616 |
| CBR3-AS1     | NR_038892    | 129.3667968 | 5.298708523 | 3.58E-12    | 24.41477885 |
| CMC1         | NM_182523    | 166.5096539 | 0.293573383 | 2.44E-23    | 567.1823937 |
| NAA40        | NM_024771    | 69.89704227 | 0.469644779 | 4.70E-09    | 148.829595  |
| TNFRSF11A    | NM_003839    | 38.46847084 | 1.825224325 | 0.002122683 | 21.07602354 |
| SCN5A        | NM_001099405 | 63.1222656  | 0.160796566 | 1.57E-08    | 392.5597854 |
| SLC29A1      | NM_001078174 | 122.8571429 | 9.066910947 | 7.13E-10    | 13.55005509 |
| PIP4K2B      | NM_003559    | 103.3873883 | 4.969939349 | 3.37E-09    | 20.80254528 |
| GPN1         | NM_001145049 | 33.28443061 | 2.348400345 | 0.00315871  | 14.17323527 |
| RBM27        | NM_018989    | 112.2239396 | 0.998984625 | 1.05E-11    | 112.3380049 |
| RTBDN        | NM_031429    | 73.01930787 | 11.59232191 | 0.000134784 | 6.298937214 |
| EOGT         | NM_001278689 | 120.5302455 | 0.842152365 | 2.45E-14    | 143.1216613 |
| RANBP6       | NM_001243202 | 115.0810825 | 1.729873774 | 1.06E-13    | 66.52571084 |
| CENPO        | NM_001199803 | 69.63191953 | 5.25040316  | 9.52E-06    | 13.26220433 |
| PARP9        | NM_001146103 | 70.42728775 | 1.779913127 | 2.92E-07    | 39.5678231  |
| RBM4         | NM_001198843 | 104.4478793 | 4.970576333 | 3.58E-10    | 21.01323313 |
| SLC41A3      | NM_001008485 | 131.6936942 | 2.203283333 | 2.98E-13    | 59.77156555 |
| BTF3L4       | NM_001136497 | 67.30502215 | 2.210973799 | 7.63E-07    | 30.4413477  |
| C12orf4      | NM_020374    | 66.50965393 | 0.524972949 | 2.01E-08    | 126.6915831 |
| ARL4C        | NM_001282431 | 86.24453119 | 4.697747098 | 5.57E-08    | 18.35870033 |
| CHTOP        | NM_001206612 | 52.22393965 | 8.650344046 | 0.001428964 | 6.037209546 |
| MSTO1        | NM_001256533 | 99.26383906 | 7.769346092 | 4.04E-08    | 12.7763441  |
| FGFR1OP      | NM_194429    | 83.65251108 | 0.057422259 | 1.68E-14    | 1456.795891 |
| PCBP1-AS1    | NR_033872    | 110.4272878 | 1.145427213 | 3.26E-11    | 96.40707544 |
| LOC101927620 | NR_110062    | 169.6319195 | 4.457531263 | 3.88E-18    | 38.05512727 |
| BLMH         | NM_000386    | 115.611328  | 2.269654934 | 7.20E-12    | 50.93784358 |
| ZNF146       | NM_001099639 | 41.85585918 | 4.092985197 | 0.002449862 | 10.2262425  |
| C10orf2      | NM_001163813 | 123.7117184 | 5.333090145 | 1.13E-11    | 23.19700492 |
| POLR3D       | NM_001722    | 129.6319195 | 7.2189377   | 2.73E-11    | 17.95720159 |
| CDK13        | NM_003718    | 52.22393965 | 0.843978753 | 8.05E-06    | 61.87826346 |
| ZBTB4        | NM_020899    | 52.75418513 | 6.739333048 | 0.001689509 | 7.827805029 |
| TRPV6        | NM_018646    | 42.85714286 | 0.961220322 | 9.84E-05    | 44.58618057 |
| SRA1         | NR_045587    | 163.9176338 | 14.65905302 | 1.29E-11    | 11.18200703 |
| ALOX12P2     | NR_002710    | 37.67310262 | 1.165611182 | 0.001625524 | 32.32047118 |

|          |              |             |             |             |             |
|----------|--------------|-------------|-------------|-------------|-------------|
| C17orf62 | NM_001193654 | 128.8957586 | 6.582340846 | 1.12E-11    | 19.58205471 |
| LHPP     | NM_001167880 | 204.9781248 | 0.936200936 | 2.08E-23    | 218.9467207 |
| UTP23    | NM_032334    | 71.48777871 | 0.592865882 | 3.98E-10    | 120.580018  |
| ZMIZ2    | NM_001300959 | 85.71428571 | 6.774207688 | 9.35E-07    | 12.65303481 |
| DDX19B   | NM_001014449 | 110.162165  | 2.228547724 | 8.11E-12    | 49.43226649 |
| DUSP18   | NM_152511    | 113.5495533 | 6.066795145 | 1.24E-10    | 18.71656297 |
| RER1     | NM_007033    | 92.48906239 | 6.858330163 | 1.40E-07    | 13.48565324 |
| GPR161   | NM_001267612 | 38.46847084 | 1.130434213 | 0.000231235 | 34.02981829 |
| ENDOV    | NM_173627    | 128.1003904 | 6.977414308 | 4.40E-11    | 18.35929253 |
| UBE2E3   | NM_001278555 | 89.36679679 | 0.437778037 | 3.71E-11    | 204.137232  |
| CEP120   | NM_001166226 | 68.10039037 | 0.964120579 | 5.94E-08    | 70.63472338 |
| TMEM11   | NM_003876    | 79.26383906 | 3.204883797 | 1.59E-07    | 24.73220375 |
| BIRC3    | NM_182962    | 78.73359358 | 0.136255942 | 1.54E-13    | 577.8360352 |
| ANXA2    | NM_001002858 | 98.46847084 | 3.951237269 | 1.58E-08    | 24.92092075 |
| ANKHD1   | NM_017747    | 75.87645073 | 1.249615366 | 2.00E-07    | 60.71984451 |
| MRPL39   | NM_017446    | 141.3256137 | 0.498000983 | 6.13E-20    | 283.7858128 |
| INF2     | NM_032714    | 100.2651227 | 2.448431176 | 2.11E-10    | 40.95076216 |
| SPDYC    | NM_001008778 | 109.3667968 | 14.19700397 | 9.93E-07    | 7.703512446 |
| CAMSAP2  | NM_001297707 | 29.36679679 | 0.761282133 | 0.002365549 | 38.57544467 |
| LARP4    | NM_052879    | 87.03989941 | 1.039184884 | 6.17E-10    | 83.75785746 |
| SNHG17   | NR_027241    | 158.2033481 | 8.010298466 | 1.13E-13    | 19.74999418 |
| ZNF70    | NM_021916    | 77.67310262 | 2.184689098 | 3.59E-08    | 35.55338958 |
| DNAJA3   | NM_001135110 | 144.713002  | 3.388815992 | 2.31E-14    | 42.70311589 |
| ADAT3    | NM_138422    | 101.3256137 | 9.458128904 | 2.58E-07    | 10.71307176 |
| ZNF276   | NR_110129    | 118.4684708 | 15.62790539 | 1.48E-07    | 7.580572564 |
| GSTZ1    | NM_001513    | 61.06049096 | 4.2249136   | 2.23E-05    | 14.45248276 |
| TBC1D9B  | NM_198868    | 51.69369417 | 2.836914245 | 7.94E-05    | 18.22180359 |
| PPT1     | NM_001142604 | 101.5907364 | 3.825847562 | 1.27E-09    | 26.55378574 |
| ILF3     | NM_012218    | 94.81595977 | 5.904165507 | 3.42E-08    | 16.05916359 |
| FBXO25   | NM_012173    | 46.50965393 | 0.110305239 | 1.02E-06    | 421.6450124 |
| MST4     | NM_001042453 | 78.46847084 | 0.710122173 | 1.34E-09    | 110.4999587 |
| TNRC6B   | NM_015088    | 30.42728775 | 0.429799799 | 0.001054751 | 70.79409486 |
| ZNF408   | NM_024741    | 246.7747767 | 8.40444699  | 2.11E-23    | 29.36240504 |
| MELK     | NM_001256690 | 146.2445312 | 1.598551082 | 7.73E-15    | 91.48567903 |
| TRIM26   | NM_003449    | 72.22393965 | 0.857615369 | 4.47E-08    | 84.21483831 |
| PSMA3    | NM_002788    | 121.5907364 | 5.743679991 | 1.69E-10    | 21.16948309 |
| HEXA     | NM_000520    | 73.28443061 | 1.173350463 | 5.04E-08    | 62.45740971 |
| NUAK1    | NM_014840    | 29.89704227 | 0.581000995 | 0.001902027 | 51.45781592 |
| TTC39B   | NM_001168340 | 89.63191953 | 0.071767667 | 3.37E-13    | 1248.917841 |
| COQ9     | NM_020312    | 156.6718189 | 1.283669994 | 3.12E-20    | 122.0499191 |
| DNAJC8   | NM_014280    | 86.24453119 | 1.494461302 | 3.21E-09    | 57.70944423 |
| KIAA1244 | NM_020340    | 69.10167405 | 0.2099653   | 1.90E-08    | 329.1099724 |
| MYO5C    | NM_018728    | 123.1222656 | 1.658906424 | 2.57E-12    | 74.21893351 |
| ATP6V0D1 | NM_004691    | 116.1415735 | 1.523477009 | 9.88E-13    | 76.23454296 |
| P2RX4    | NM_001256796 | 73.54955335 | 5.212247333 | 2.20E-06    | 14.11091007 |
| TOMM70A  | NM_014820    | 67.30502215 | 1.475589237 | 5.05E-07    | 45.61230217 |
| MARK3    | NM_001128921 | 108.3655131 | 1.530119154 | 9.74E-11    | 70.82161728 |
| CEP131   | NM_001009811 | 81.85585918 | 0.410883369 | 9.80E-12    | 199.2192074 |
| SSH2     | NM_001282130 | 94.55083703 | 0.114419551 | 2.99E-12    | 826.3521099 |
| C3orf58  | NM_173552    | 152.2239396 | 2.468300905 | 1.80E-16    | 61.67154876 |
| SPATA33  | NR_073515    | 170.162165  | 7.830198717 | 1.39E-15    | 21.73152575 |
| CC2D1B   | NM_032449    | 116.1415735 | 3.884960905 | 7.95E-12    | 29.89517174 |
| SGPP1    | NM_030791    | 143.9176338 | 0.207129612 | 2.06E-22    | 694.8192105 |
| SNX2     | NM_003100    | 125.9794085 | 0.186620073 | 4.67E-19    | 675.05819   |
| SLC10A4  | NM_152679    | 55.61132799 | 2.766277183 | 2.36E-05    | 20.10331008 |
| PDE5A    | NM_033437    | 26.50965393 | 0.207516066 | 0.003388022 | 127.7474775 |
| ZNF35    | NM_003420    | 97.67310262 | 2.574354943 | 2.67E-10    | 37.94080644 |
| ATP2A2   | NM_170665    | 120.7953682 | 2.101089582 | 3.88E-12    | 57.49177439 |
| ARF6     | NM_001663    | 115.611328  | 11.38279776 | 2.92E-08    | 10.15667065 |
| BRMS1    | NM_015399    | 169.3667968 | 0.699110462 | 2.34E-24    | 242.2604237 |
| MRPS18A  | NM_018135    | 78.99871632 | 2.702097716 | 1.13E-07    | 29.23606939 |
| TCF12    | NM_207037    | 73.28443061 | 0.184105781 | 1.05E-08    | 398.0561088 |
| TESC     | NM_017899    | 97.93822536 | 0.677334655 | 4.02E-12    | 144.5935545 |
| SPRY1    | NM_001258039 | 66.77477667 | 5.053143072 | 1.11E-05    | 13.21450347 |

|               |              |             |             |             |             |
|---------------|--------------|-------------|-------------|-------------|-------------|
| BTRC          | NM_003939    | 88.36551311 | 1.451488261 | 1.93E-08    | 60.8792475  |
| SLC12A2       | NR_046207    | 139.2638391 | 0.851487667 | 2.26E-16    | 163.5535597 |
| TXLNG         | NM_018360    | 126.5096539 | 1.846686442 | 4.21E-13    | 68.50629921 |
| MPDU1         | NR_024603    | 87.30502215 | 18.15140053 | 0.000115037 | 4.809822911 |
| WDR35         | NM_001006657 | 83.65251108 | 0.298395576 | 6.38E-11    | 280.3409896 |
| ZNF658B       | NR_003528    | 195.8764507 | 6.921933057 | 9.08E-18    | 28.29794063 |
| FAM122C       | NM_001170783 | 35.34620525 | 0.72673466  | 0.000995503 | 48.63701596 |
| GIPC1         | NM_202470    | 66.77477667 | 3.58413326  | 8.93E-06    | 18.63066238 |
| TOMM20        | NM_014765    | 85.71428571 | 3.871569717 | 6.92E-08    | 22.13941424 |
| ZNF652        | NM_001145365 | 60.79536822 | 1.142705475 | 6.57E-07    | 53.20300772 |
| GTPBP3        | NM_032620    | 113.2844306 | 19.71862114 | 2.27E-06    | 5.745048288 |
| ZNF304        | NM_020657    | 40.79536822 | 2.022834753 | 0.000298828 | 20.16742502 |
| S1PR5         | NM_030760    | 107.3050222 | 0.418774141 | 1.39E-15    | 256.2360269 |
| RNF187        | NM_001010858 | 48.57142857 | 2.321876046 | 2.97E-05    | 20.9190446  |
| BNIP1         | NM_013980    | 40.26512274 | 0.513348141 | 1.49E-05    | 78.43628817 |
| ALG5          | NM_001142364 | 112.2239396 | 1.784167483 | 1.15E-11    | 62.8998907  |
| HN1L          | NM_144570    | 78.46847084 | 3.1646393   | 7.82E-08    | 24.79539164 |
| MUM1          | NM_032853    | 45.97940845 | 2.802973799 | 0.000218624 | 16.40379531 |
| KIAA1524      | NM_020890    | 98.73359358 | 1.299144477 | 6.17E-11    | 75.99893263 |
| MAPKAPK3      | NM_001243925 | 69.36679679 | 2.299722713 | 7.27E-07    | 30.16311332 |
| TYW5          | NM_001039693 | 241.5907364 | 3.426141971 | 1.69E-26    | 70.5139304  |
| PNPLA8        | NM_001256010 | 65.50837026 | 1.123794026 | 1.25E-06    | 58.2921503  |
| ARL8A         | NM_001256129 | 98.2033481  | 5.045014298 | 1.21E-08    | 19.46542513 |
| ZNF33A        | NM_001278176 | 80.26512274 | 1.380965897 | 3.19E-08    | 58.12245106 |
| COX5B         | NM_001862    | 140         | 12.15676687 | 3.32E-10    | 11.51621985 |
| RNF141        | NM_016422    | 149.3667968 | 2.323542889 | 1.41E-16    | 64.28407132 |
| ACBD5         | NR_073196    | 107.0398994 | 1.551541049 | 3.01E-11    | 68.9894086  |
| MAGEA2        | NM_005361    | 97.93822536 | 11.47305579 | 2.15E-06    | 8.536367918 |
| SMG1P1        | NR_027154    | 156.6718189 | 1.493742545 | 2.88E-17    | 104.8854232 |
| RPS6KB1       | NM_001272044 | 133.0193079 | 1.677510062 | 3.09E-14    | 79.29568403 |
| ZFYVE26       | NM_015346    | 60.26512274 | 0.590134824 | 2.72E-07    | 102.1209396 |
| SPATA6L       | NM_001039395 | 35.08108251 | 2.11925906  | 0.004235871 | 16.55346586 |
| NDUFC2        | NM_001204055 | 69.36679679 | 6.280851198 | 2.48E-05    | 11.04417134 |
| ISOC2         | NM_001136201 | 97.93822536 | 3.603391158 | 1.98E-09    | 27.17945987 |
| C2orf69       | NM_153689    | 138.7335936 | 0.953500412 | 5.96E-19    | 145.4992486 |
| PMPCB         | NM_004279    | 111.9588169 | 3.529929008 | 4.10E-11    | 31.71701659 |
| NCOA3         | NM_001174087 | 133.2844306 | 0.32426674  | 9.95E-17    | 411.0333079 |
| ZUFSP         | NM_145062    | 72.75418513 | 2.150801949 | 3.31E-07    | 33.82653859 |
| EPHX4         | NM_173567    | 54.81595977 | 0.892153467 | 1.03E-05    | 61.44229863 |
| CYP51A1       | NM_000786    | 138.4684708 | 2.399832925 | 1.69E-14    | 57.69921288 |
| TMEM171       | NM_173490    | 81.06049096 | 4.297536255 | 1.30E-07    | 18.86208426 |
| MEF2BNB-MEF2B | NR_027307    | 78.99871632 | 4.31875034  | 8.48E-07    | 18.29203128 |
| GTF3C5        | NM_001286709 | 164.713002  | 4.037627467 | 1.40E-16    | 40.79450207 |
| MRPL55        | NM_181441    | 61.3256137  | 9.41679155  | 0.001458596 | 6.512368185 |
| FAM96A        | NM_001014812 | 75.34620525 | 2.437405505 | 9.41E-08    | 30.91246208 |
| ZNF189        | NM_197977    | 57.93822536 | 2.192590651 | 3.36E-06    | 26.42455185 |
| REXO2         | NM_015523    | 86.24453119 | 2.883020414 | 9.24E-09    | 29.91464465 |
| STXBP5-AS1    | NR_034115    | 31.95881691 | 0.072297043 | 0.000651647 | 442.0487446 |
| POLD3         | NR_046409    | 29.69112681 | 1.200963748 | 0.002121421 | 24.72275025 |
| RALGPS1       | NM_001190730 | 111.9588169 | 0.219170415 | 1.74E-13    | 510.8299718 |
| CASP7         | NM_001267056 | 93.54955335 | 2.9534489   | 2.67E-09    | 31.67468154 |
| SERBP1        | NM_001018067 | 90.42728775 | 5.871712922 | 2.28E-07    | 15.40049538 |
| SPOCK3        | NM_001204356 | 51.69369417 | 0.014182662 | 1.22E-07    | 3644.851408 |
| ALCAM         | NM_001243281 | 81.85585918 | 0.893841381 | 3.42E-09    | 91.57761203 |
| FIP1L1        | NM_030917    | 104.1827566 | 0.3882602   | 2.75E-13    | 268.3323104 |
| KPTN          | NR_111923    | 47.83526763 | 4.183171717 | 0.000358436 | 11.43516711 |
| LINC01315     | NR_120595    | 121.3256137 | 4.846041796 | 1.99E-11    | 25.03602297 |
| NADSYN1       | NM_018161    | 109.1016741 | 0.096213955 | 8.06E-18    | 1133.948546 |
| NPTN          | NM_001161364 | 54.28571429 | 1.101836862 | 2.92E-06    | 49.26837734 |
| PBRM1         | NM_018313    | 97.93822536 | 0.448807254 | 1.42E-11    | 218.2189003 |
| CLCN2         | NM_004366    | 211.4285714 | 3.195034688 | 1.56E-23    | 66.1741083  |
| FLVCR1-AS1    | NR_027286    | 112.4890624 | 8.421308253 | 4.97E-08    | 13.35767069 |
| RNF19B        | NM_001300826 | 149.1016741 | 1.840706935 | 3.77E-17    | 81.00239706 |
| FAM111A       | NM_001142521 | 57.93822536 | 4.786752427 | 6.49E-05    | 12.10386922 |

|              |              |             |             |             |             |
|--------------|--------------|-------------|-------------|-------------|-------------|
| MAGEF1       | NM_022149    | 153.0193079 | 15.10199796 | 5.77E-10    | 10.13238833 |
| ZNF655       | NM_024061    | 117.9382254 | 4.614578411 | 2.39E-11    | 25.55774653 |
| RBKS         | NM_022128    | 58.46847084 | 0.066849323 | 1.43E-08    | 874.6307122 |
| TBC1D1       | NM_001253912 | 65.91763382 | 1.247249573 | 7.01E-07    | 51.24686768 |
| CAV2         | NM_198212    | 38.73359358 | 4.659557101 | 0.003048421 | 8.312720018 |
| PIGG         | NM_001289055 | 134.8159598 | 1.730482176 | 8.00E-16    | 77.90658673 |
| DENND1B      | NM_001300858 | 108.5714286 | 0.259112407 | 4.04E-13    | 419.0128521 |
| ZNF195       | NR_040083    | 101.3256137 | 3.794813399 | 1.91E-09    | 26.70107936 |
| TMEM147      | NM_032635    | 123.9176338 | 4.955235185 | 3.89E-11    | 25.00741724 |
| FIGNL1       | NM_001287494 | 64.18275656 | 0.13843883  | 4.14E-10    | 463.6181661 |
| ZFYVE28      | NM_001172656 | 83.38738834 | 1.047431273 | 3.21E-09    | 79.61132198 |
| PLA2G12A     | NM_030821    | 98.73359358 | 1.612858697 | 1.32E-11    | 61.21651807 |
| VDAC2        | NR_033675    | 71.95881691 | 6.434708443 | 2.20E-05    | 11.18291801 |
| KANSL3       | NM_001115016 | 66.24453119 | 2.80002613  | 2.54E-06    | 23.65854035 |
| CEP78        | NM_001098802 | 138.7335936 | 1.482384373 | 2.45E-16    | 93.58813823 |
| CAMK2D       | NM_172128    | 63.38738834 | 0.975391658 | 6.97E-07    | 64.98660081 |
| SSR1         | NR_120448    | 78.46847084 | 4.408002209 | 1.24E-06    | 17.80136831 |
| EPS15L1      | NR_047666    | 65.97940845 | 2.071450901 | 3.57E-06    | 31.85178486 |
| NOD1         | NM_006092    | 149.8970423 | 1.066955697 | 6.61E-17    | 140.490409  |
| ZBED8        | NM_022090    | 214.8159598 | 4.258037137 | 5.41E-24    | 50.44952706 |
| SLCO5A1      | NM_030958    | 35.61132799 | 0.215101294 | 0.000355038 | 165.5560844 |
| ACTR10       | NM_018477    | 92.75418513 | 1.039209367 | 2.96E-10    | 89.25456992 |
| BAHD1        | NM_014952    | 40.79536822 | 2.956185165 | 0.000970407 | 13.80000438 |
| HAUS2        | NM_001130447 | 157.9382254 | 2.491621083 | 4.03E-17    | 63.38773839 |
| ANKFY1       | NM_001257999 | 72.22393965 | 1.882345868 | 8.45E-07    | 38.36911212 |
| HSPBP1       | NM_012267    | 37.67310262 | 1.085875052 | 0.000767477 | 34.69377306 |
| GPATCH3      | NM_022078    | 87.83526763 | 2.936513116 | 2.91E-09    | 29.91141676 |
| EI24         | NM_004879    | 155.0810825 | 3.203331905 | 6.16E-17    | 48.41243028 |
| CTBP2        | NM_001329    | 72.22393965 | 4.840754729 | 9.05E-06    | 14.91997502 |
| ITGA2        | NR_073103    | 121.5907364 | 1.813455282 | 3.12E-12    | 67.04920582 |
| NFATC3       | NM_173163    | 138.4684708 | 0.455857281 | 1.38E-16    | 303.7539962 |
| AP2S1        | NM_021575    | 78.46847084 | 12.93418502 | 9.74E-05    | 6.066750298 |
| LINC00339    | NR_023919    | 68.36551311 | 14.31136117 | 0.000914767 | 4.777009839 |
| CPPED1       | NM_001099455 | 140.2651227 | 0.589602321 | 1.81E-16    | 237.8978469 |
| SNAPC2       | NM_003083    | 155.0810825 | 17.77796165 | 8.07E-10    | 8.723220667 |
| NUP50        | NM_007172    | 61.06049096 | 2.774432598 | 5.95E-06    | 22.00828054 |
| PDE4DIP      | NM_001198832 | 42.71043468 | 1.451922257 | 0.0006999   | 29.41647494 |
| EIF1         | NM_005801    | 200.0592073 | 27.28989862 | 1.85E-11    | 7.330888623 |
| USP21        | NM_001014443 | 106.7747767 | 1.829608195 | 2.24E-12    | 58.35936729 |
| KRT8         | NM_001256293 | 56.93694168 | 9.378631759 | 0.000676266 | 6.070921979 |
| GNA13        | NM_006572    | 157.9382254 | 1.053289503 | 2.25E-18    | 149.9475927 |
| FAM53B       | NM_014661    | 48.57142857 | 0.983884228 | 1.66E-05    | 49.36701616 |
| SCARB1       | NM_005505    | 137.6731026 | 2.827215336 | 1.42E-13    | 48.69565501 |
| ST6GAL1      | NM_173216    | 82.38610466 | 0.291813102 | 3.48E-10    | 282.3248994 |
| FGFR4        | NM_001291980 | 183.6525111 | 7.043700377 | 1.93E-17    | 26.07329972 |
| SLC22A18     | NM_002555    | 91.69369417 | 5.528673336 | 3.59E-08    | 16.58511701 |
| IFT122       | NM_052990    | 61.59073644 | 0.857448805 | 2.49E-07    | 71.83022018 |
| SDCBP        | NM_001007069 | 140.5302455 | 0.981517827 | 2.18E-17    | 143.1764575 |
| FRMD5        | NM_001286491 | 95.61132799 | 1.681027994 | 7.07E-09    | 56.87670184 |
| SPRED2       | NM_181784    | 75.61132799 | 2.453524518 | 5.48E-07    | 30.81743322 |
| CEBPA-AS1    | NR_026887    | 103.3873883 | 14.61214012 | 5.08E-06    | 7.075444631 |
| MINOS1-NBL1  | NM_001204089 | 95.34620525 | 2.524948527 | 2.71E-09    | 37.76164316 |
| HJURP        | NM_001282962 | 89.89704227 | 5.354015322 | 4.83E-08    | 16.79058368 |
| TMEM175      | NM_032326    | 96.67181894 | 0.674220616 | 3.55E-12    | 143.3830658 |
| LOC100129361 | NM_001271592 | 147.0398994 | 8.70811466  | 4.46E-12    | 16.88538853 |
| TMEM217      | NR_104442    | 58.46847084 | 3.583310164 | 2.30E-05    | 16.31688806 |
| LRCH4        | NM_002319    | 115.0810825 | 2.271710995 | 8.43E-13    | 50.65832878 |
| FADS1        | NM_013402    | 137.1428571 | 16.24813817 | 8.75E-09    | 8.440527506 |
| ATXN1        | NM_000332    | 46.50965393 | 0.0831008   | 1.52E-05    | 559.677573  |
| PHYKPL       | NR_103509    | 115.3462052 | 12.61879629 | 7.32E-08    | 9.140824737 |
| STEAP2       | NM_152999    | 104.1827566 | 2.109923031 | 3.22E-11    | 49.37751522 |
| CYFIP2       | NM_001291721 | 74.55083703 | 1.27648035  | 3.87E-07    | 58.40343491 |
| EEF1E1       | NM_004280    | 115.0810825 | 3.118534977 | 3.11E-11    | 36.90229013 |
| FBXO16       | NM_001258211 | 76.14157347 | 1.080910292 | 6.70E-08    | 70.44208386 |

|             |              |             |             |             |             |
|-------------|--------------|-------------|-------------|-------------|-------------|
| DNM1        | NM_001005336 | 95.61132799 | 4.853932488 | 3.74E-08    | 19.69770454 |
| NUDT2       | NM_001244390 | 98.46847084 | 2.608773489 | 4.90E-10    | 37.74512093 |
| VPS29       | NM_001282151 | 121.8558592 | 1.289136226 | 1.24E-15    | 94.52519967 |
| VCL         | NM_014000    | 170.4272878 | 2.583392982 | 5.76E-17    | 65.97033009 |
| PRMT1       | NM_198318    | 72.75418513 | 6.355539307 | 1.20E-05    | 11.44736609 |
| SCRN2       | NM_001145023 | 96.40669621 | 8.799375635 | 2.10E-07    | 10.95608373 |
| PPP1R15B    | NM_032833    | 141.5907364 | 1.697050613 | 1.62E-17    | 83.43341991 |
| ZNF707      | NM_001288808 | 110.6924105 | 0.424823352 | 6.61E-17    | 260.561031  |
| SMC6        | NM_001142286 | 151.6936942 | 0.300335148 | 1.16E-20    | 505.0813897 |
| SLC1A3      | NM_001166695 | 65.71428571 | 1.200173554 | 2.06E-06    | 54.75398578 |
| EML3        | NM_001300794 | 65.97940845 | 8.186365289 | 0.000202947 | 8.0596707   |
| KANTR       | NR_110456    | 77.40797988 | 0.100841586 | 2.28E-12    | 767.6196228 |
| SYF2        | NM_207170    | 43.91763382 | 0.560868422 | 2.50E-05    | 78.30291761 |
| PI4K2A      | NM_018425    | 61.06049096 | 2.180119179 | 6.92E-06    | 28.00786835 |
| COPS8       | NM_006710    | 63.65251108 | 3.869716549 | 1.37E-05    | 16.44888205 |
| PPAP2A      | NM_176895    | 163.1222656 | 0.523836455 | 3.42E-20    | 311.3992239 |
| RASSF6      | NM_001270392 | 92.48906239 | 0.286444369 | 4.59E-13    | 322.8866488 |
| N6AMT2      | NM_174928    | 177.9382254 | 2.127977761 | 2.13E-19    | 83.61846097 |
| SVIL-AS1    | NR_110925    | 108.1003904 | 1.255726595 | 1.59E-11    | 86.08592893 |
| SF3A1       | NM_001005409 | 135.8764507 | 3.272514875 | 9.55E-14    | 41.52049904 |
| CYCS        | NM_018947    | 58.2033481  | 8.533824586 | 0.000920015 | 6.82031222  |
| ELMO3       | NM_024712    | 119.2638391 | 8.401749934 | 1.09E-09    | 14.19511887 |
| GGA1        | NM_013365    | 69.10167405 | 5.333597391 | 8.69E-06    | 12.95592243 |
| ZNF200      | NM_001145448 | 70.42728775 | 4.209472123 | 1.64E-06    | 16.73066971 |
| METTL15     | NM_001113528 | 58.73359358 | 0.68231287  | 1.04E-06    | 86.08014913 |
| CKLF-CMTM1  | NM_001204099 | 58.2033481  | 3.251570903 | 1.55E-05    | 17.90007041 |
| TPM3        | NM_001278189 | 152.4890624 | 4.117489055 | 7.02E-15    | 37.03447911 |
| CAPN10-AS1  | NR_103792    | 81.85585918 | 5.451473153 | 7.16E-07    | 15.015365   |
| MED27       | NM_001253881 | 53.54955335 | 0.972756645 | 4.98E-06    | 55.04928046 |
| IFI27L1     | NM_145249    | 44.71300204 | 0.160211432 | 1.95E-07    | 279.0874621 |
| ELMO2       | NM_182764    | 97.93822536 | 2.096982446 | 4.78E-10    | 46.7043611  |
| EIF1AX      | NM_001412    | 86.77477667 | 1.504976229 | 5.74E-10    | 57.65856961 |
| ZNF286A     | NM_001288649 | 81.59073644 | 4.296569452 | 1.89E-07    | 18.98973992 |
| RASSF8      | NM_007211    | 31.69369417 | 1.092745814 | 0.001245276 | 29.00372049 |
| UNC45A      | NM_001039675 | 112.4890624 | 12.7551915  | 1.32E-07    | 8.819080635 |
| TMEM177     | NM_001105199 | 126.5096539 | 8.866620103 | 5.50E-10    | 14.26808101 |
| FAM222B     | NM_001288637 | 154.550837  | 1.205983778 | 1.75E-16    | 128.1533299 |
| INPP4B      | NM_001101669 | 38.2033481  | 0.139179672 | 0.00028857  | 274.4894246 |
| ECHDC1      | NM_001105545 | 112.2239396 | 1.517475768 | 9.89E-12    | 73.95435369 |
| GARS        | NM_002047    | 67.30502215 | 3.800636435 | 9.43E-06    | 17.708882   |
| CRLF3       | NR_073118    | 172.7541851 | 2.669968889 | 2.25E-18    | 64.70269592 |
| SLC44A2     | NM_020428    | 124.1827566 | 4.620167867 | 5.65E-12    | 26.87840791 |
| METTL4      | NM_022840    | 52.48906239 | 1.043109062 | 2.83E-05    | 50.31982206 |
| DKC1        | NM_001363    | 57.40797988 | 2.829532277 | 7.22E-06    | 20.28885846 |
| QDPR        | NM_000320    | 86.24453119 | 0.489728709 | 5.08E-11    | 176.1067498 |
| COMMD3-BM11 | NM_001204062 | 120.7953682 | 5.548922786 | 7.90E-11    | 21.76915644 |
| HMGB1       | NM_002128    | 117.4079799 | 6.902296139 | 1.98E-10    | 17.00998878 |
| TMEM63C     | NM_020431    | 106.2445312 | 1.475094032 | 9.28E-11    | 72.02559899 |
| MRPL49      | NR_037568    | 112.7541851 | 14.34122398 | 2.13E-07    | 7.86224281  |
| HMOX2       | NM_001286267 | 144.4478793 | 2.12394957  | 4.25E-16    | 68.00909085 |
| MC4R        | NM_005912    | 46.24453119 | 5.929941664 | 0.003970493 | 7.798479954 |
| SRP19       | NM_001204194 | 57.20206442 | 2.035380197 | 7.61E-06    | 28.10387195 |
| LAMTOR2     | NM_001145264 | 95.61132799 | 8.226283151 | 4.53E-07    | 11.62266436 |
| SERTAD2     | NM_014755    | 183.3873883 | 4.301311179 | 6.40E-19    | 42.63522929 |
| TMEM51      | NM_001136216 | 63.65251108 | 3.778283025 | 7.26E-06    | 16.84694097 |
| PICK1       | NM_001039584 | 67.30502215 | 2.183443152 | 2.87E-07    | 30.82517724 |
| CBX3        | NM_016587    | 134.550837  | 6.11654673  | 1.11E-12    | 21.99784339 |
| DIS3L2      | NM_001257281 | 82.12098192 | 0.623107319 | 4.62E-09    | 131.7926775 |
| AARSD1      | NM_001261434 | 123.1222656 | 4.855391211 | 1.92E-11    | 25.35784662 |
| NEK7        | NM_133494    | 98.2033481  | 1.257547382 | 1.88E-09    | 78.09117133 |
| SLC35B3     | NR_109914    | 117.9382254 | 1.092769836 | 1.57E-14    | 107.9259524 |
| PBLD        | NM_001033083 | 43.91763382 | 1.583390422 | 0.000476904 | 27.73645287 |
| NPEPL1      | NM_024663    | 23.1222656  | 0.263085078 | 0.002923898 | 87.88892833 |
| GCOM1       | NM_001285900 | 83.1222656  | 1.055105118 | 2.67E-09    | 78.78102777 |

|            |              |             |             |             |             |
|------------|--------------|-------------|-------------|-------------|-------------|
| GDI1       | NM_001493    | 49.10167405 | 5.099489093 | 0.001223677 | 9.628743812 |
| CLDND1     | NM_019895    | 101.3256137 | 12.1103443  | 1.34E-06    | 8.36686482  |
| NDRG4      | NM_001242836 | 64.4478793  | 8.654558239 | 0.000252253 | 7.446697742 |
| WDTC1      | NM_015023    | 31.95881691 | 0.048575985 | 8.52E-05    | 657.9139241 |
| NAA10      | NM_001256119 | 45.71428571 | 3.486399929 | 0.000336274 | 13.11217492 |
| TRIB3      | NM_021158    | 55.08108251 | 5.252097448 | 0.000179055 | 10.48744488 |
| NUTM2B-AS1 | NR_120613    | 54.55083703 | 1.385772928 | 4.73E-05    | 39.36491754 |
| SETD4      | NM_017438    | 97.93822536 | 3.246047466 | 4.47E-09    | 30.17153211 |
| QTRTD1     | NM_024638    | 50.16216501 | 0.56572722  | 9.12E-07    | 88.66846647 |
| SPECC1     | NM_001033555 | 69.63191953 | 0.428379676 | 5.11E-08    | 162.5472063 |
| FAM3A      | NM_001171134 | 92.48906239 | 2.403386572 | 6.22E-10    | 38.48280733 |
| ZNF2       | NM_001017396 | 100.7953682 | 1.792408373 | 1.48E-11    | 56.23460017 |
| EMX1       | NM_004097    | 63.65251108 | 2.600329746 | 1.73E-06    | 24.47863052 |
| MICAL2     | NM_001282668 | 57.40797988 | 1.886698028 | 2.42E-05    | 30.4277521  |
| EEFSEC     | NM_021937    | 95.34620525 | 1.50632719  | 5.97E-09    | 63.29714146 |
| CARHSP1    | NM_001278260 | 198.2033481 | 11.05726099 | 1.54E-16    | 17.92517588 |
| HM13       | NM_178580    | 141.5907364 | 6.360618444 | 5.72E-12    | 22.2605298  |
| GMIP       | NM_001288999 | 162.6512274 | 2.541445101 | 6.13E-19    | 63.99950459 |
| CDK16      | NM_006201    | 77.93822536 | 4.169427244 | 2.70E-07    | 18.69278939 |
| SLC33A1    | NM_004733    | 139.5289618 | 0.176845066 | 8.41E-22    | 788.9898462 |
| BCL7B      | NM_001707    | 69.10167405 | 1.238794544 | 1.18E-07    | 55.78138393 |
| CNOT1      | NR_049763    | 117.9382254 | 1.602256245 | 1.12E-11    | 73.60759286 |
| C14orf2    | NM_004894    | 135.3462052 | 3.333576143 | 2.32E-14    | 40.60090409 |
| BAMBI      | NM_012342    | 152.2239396 | 11.38158145 | 5.64E-12    | 13.37458597 |
| TSPAN13    | NM_014399    | 143.6525111 | 2.082556089 | 5.73E-16    | 68.9789398  |
| CRELD1     | NM_015513    | 113.8146761 | 5.125938596 | 1.30E-10    | 22.20367528 |
| ACADSB     | NM_001609    | 139.5289618 | 0.479080405 | 7.12E-18    | 291.2433077 |
| DCP1A      | NM_001290206 | 149.8970423 | 1.212846845 | 2.64E-16    | 123.5910724 |
| TYSND1     | NM_001040273 | 98.73359358 | 11.83525624 | 4.41E-07    | 8.342328344 |
| OXSM       | NR_026937    | 95.61132799 | 6.071234049 | 1.46E-08    | 15.7482527  |
| DNM3       | NM_001278252 | 134.550837  | 0.028902559 | 3.14E-21    | 4655.326149 |
| PLK4       | NM_001190801 | 81.59073644 | 2.043514669 | 3.58E-09    | 39.92667031 |
| STK16      | NR_026909    | 143.9176338 | 11.91075004 | 3.72E-11    | 12.08300345 |
| PPWD1      | NM_001278929 | 89.36679679 | 1.031698894 | 2.04E-10    | 86.62100665 |
| CAGE1      | NM_205864    | 144.4478793 | 0.550591301 | 3.92E-19    | 262.3504566 |
| MED15      | NM_001293234 | 87.30502215 | 2.517296987 | 1.45E-08    | 34.68205086 |
| CXorf56    | NM_022101    | 38.2033481  | 0.850089546 | 0.000110099 | 44.94038103 |
| SUPT5H     | NM_003169    | 98.2033481  | 1.897876612 | 2.01E-10    | 51.74380015 |
| METTTL22   | NM_024109    | 161.5907364 | 1.845860848 | 2.04E-19    | 87.54220917 |
| SPC25      | NM_020675    | 67.03989941 | 0.206886218 | 1.14E-10    | 324.0423653 |
| ZNF627     | NM_001290084 | 193.0193079 | 1.284518227 | 3.22E-24    | 150.2659159 |
| DCLK2      | NR_036614    | 71.95881691 | 0.868030767 | 5.83E-08    | 82.89892435 |
| TUBB4B     | NM_006088    | 169.3667968 | 22.75446077 | 8.55E-10    | 7.443234912 |
| PRKAG2     | NM_024429    | 69.10167405 | 1.483780779 | 1.15E-06    | 46.57135005 |
| USB1       | NM_024598    | 196.1415735 | 1.729190034 | 6.41E-24    | 113.4297386 |
| SGOL1      | NM_001012409 | 84.18275656 | 1.32313193  | 9.61E-10    | 63.62385688 |
| MAEA       | NM_001297431 | 77.67310262 | 1.9055939   | 1.11E-07    | 40.76057475 |
| C9orf16    | NM_024112    | 127.0398994 | 13.76522241 | 7.28E-09    | 9.229048078 |
| TWF1       | NR_073473    | 146.7747767 | 1.08841963  | 3.30E-19    | 134.8512767 |
| PPIL6      | NM_001111298 | 127.5701449 | 0.190404889 | 9.39E-20    | 669.9940605 |
| TMPO       | NM_001032283 | 115.0810825 | 1.496333862 | 1.04E-12    | 76.90869359 |
| FAM136A    | NM_032822    | 135.8764507 | 8.544454662 | 2.69E-11    | 15.90229641 |
| RABL2A     | NM_007082    | 101.060491  | 3.642634649 | 8.77E-10    | 27.74379006 |
| FOXN2      | NM_002158    | 89.10167405 | 1.206154711 | 4.11E-09    | 73.87250842 |
| IL6ST      | NM_001190981 | 165.5083703 | 0.88023772  | 2.05E-19    | 188.0269007 |
| SRRM1      | NM_005839    | 50.69241049 | 3.632401215 | 7.32E-05    | 13.95561985 |
| OSCAR      | NM_130771    | 47.03989941 | 2.049751844 | 5.00E-05    | 22.94907042 |
| TEAD2      | NM_001256660 | 97.40797988 | 5.153074847 | 7.37E-09    | 18.90288474 |
| KIAA1191   | NR_109798    | 164.4478793 | 6.308758014 | 8.02E-16    | 26.06660121 |
| UXS1       | NM_025076    | 149.3667968 | 1.226846088 | 1.55E-15    | 121.7486026 |
| SLC2A8     | NM_014580    | 95.08108251 | 1.200399121 | 2.50E-12    | 79.20789082 |
| CHD8       | NM_020920    | 44.4478793  | 0.997924831 | 2.03E-05    | 44.54030797 |
| IFNLR1     | NM_170743    | 97.93822536 | 1.084827562 | 4.80E-11    | 90.2799936  |
| AP3M2      | NM_001134296 | 69.63191953 | 2.939368633 | 4.65E-07    | 23.68941369 |



|              |              |             |             |             |             |
|--------------|--------------|-------------|-------------|-------------|-------------|
| MKNK1        | NM_001135553 | 173.0193079 | 2.449144506 | 1.09E-18    | 70.64479351 |
| PSTPIP2      | NM_024430    | 69.10167405 | 0.615296978 | 3.61E-08    | 112.3062139 |
| RFC2         | NM_181471    | 109.6319195 | 4.476751005 | 3.42E-10    | 24.4891707  |
| ACSF2        | NM_001288971 | 125.9794085 | 2.055558626 | 3.40E-13    | 61.28718826 |
| UQCR11       | NM_006830    | 109.8970423 | 8.072653021 | 4.94E-09    | 13.61349757 |
| DNLZ         | NM_001080849 | 103.1222656 | 22.41683148 | 0.000148974 | 4.600215945 |
| EEF1D        | NM_001130057 | 92.01802419 | 7.315271078 | 2.20E-07    | 12.57889465 |
| PTGR1        | NM_001146109 | 52.48906239 | 2.306154796 | 7.52E-05    | 22.76042462 |
| TK2          | NM_001272050 | 107.5701449 | 0.953040861 | 2.19E-12    | 112.8704437 |
| NEK4         | NM_001193533 | 143.9176338 | 0.939786458 | 3.04E-16    | 153.1386546 |
| TOR1B        | NM_014506    | 203.3873883 | 6.295260079 | 2.32E-20    | 32.30801997 |
| GNG5         | NM_005274    | 113.0193079 | 8.395501326 | 6.12E-09    | 13.46188911 |
| PYGB         | NM_002862    | 215.3462052 | 2.24838896  | 1.52E-23    | 95.7780033  |
| CLUL1        | NM_001289036 | 50.16216501 | 0.984048362 | 4.21E-06    | 50.97530462 |
| LOC100289495 | NR_040022    | 93.54955335 | 0.299563689 | 1.02E-14    | 312.2860242 |
| CCNJ         | NM_019084    | 87.30502215 | 1.121955631 | 7.75E-11    | 77.81503984 |
| UBE3C        | NM_014671    | 75.08108251 | 2.775532206 | 5.92E-07    | 27.05105794 |
| SNPH         | NM_014723    | 26.50965393 | 0.903581869 | 0.00387543  | 29.33840846 |
| CATIP-AS1    | NR_110573    | 178.2033481 | 34.47075926 | 4.84E-07    | 5.169696054 |
| MEPCE        | NM_001194991 | 212.4890624 | 39.63642229 | 3.34E-10    | 5.360954651 |
| ITPA         | NM_033453    | 69.89704227 | 3.733510338 | 3.33E-06    | 18.72153441 |
| TSPYL4       | NM_021648    | 89.89704227 | 6.500601639 | 3.55E-07    | 13.82903418 |
| APBB1        | NR_047512    | 33.28443061 | 1.207453621 | 0.002338344 | 27.56580463 |
| CPB2-AS1     | NR_046227    | 47.30502215 | 0.841539095 | 7.28E-06    | 56.21250684 |
| TAF1A-AS1    | NR_110614    | 55.61132799 | 0.595036619 | 8.47E-07    | 93.45866493 |
| STX6         | NM_001286210 | 77.93822536 | 1.362347745 | 6.86E-08    | 57.20876014 |
| SNX17        | NM_001267059 | 50.42728775 | 9.368329008 | 0.003354936 | 5.382740904 |
| SENP8        | NM_145204    | 107.0398994 | 1.489829337 | 2.52E-12    | 71.84708795 |
| C15orf40     | NM_001160113 | 89.89704227 | 3.323054    | 5.18E-09    | 27.0525373  |
| PQLC2        | NM_017765    | 103.6525111 | 0.667155139 | 5.58E-14    | 155.3649295 |
| SEC13        | NM_001278946 | 132.4890624 | 7.460517862 | 1.46E-11    | 17.75869515 |
| SUCO         | NM_014283    | 149.1016741 | 0.322038023 | 1.81E-20    | 462.9940044 |
| PRPF38A      | NM_032864    | 56.40669621 | 3.753321054 | 5.80E-05    | 15.02847622 |
| ADAM15       | NR_048577    | 143.6525111 | 5.35627783  | 5.23E-14    | 26.81946599 |
| C2CD3        | NM_001286577 | 55.08108251 | 1.158808661 | 4.71E-06    | 47.53250847 |
| ZNF629       | NM_001080417 | 47.30502215 | 5.267603154 | 0.000427353 | 8.980369396 |
| SLC38A3      | NM_006841    | 43.91763382 | 0.503168757 | 4.08E-05    | 87.28211597 |
| RAB5B        | NM_001252036 | 52.22393965 | 2.685023489 | 4.91E-05    | 19.4500867  |
| LMCD1        | NM_001278234 | 37.67310262 | 0.673937767 | 0.00018728  | 55.89997247 |
| C9orf69      | NM_001256526 | 77.40797988 | 14.00913828 | 0.000265796 | 5.525534713 |
| TANGO2       | NM_001283148 | 157.6731026 | 0.807390013 | 3.06E-19    | 195.2874077 |
| NFATC2       | NM_012340    | 44.71300204 | 0.72485343  | 3.30E-05    | 61.68557694 |
| CTNNBIP1     | NM_001012329 | 37.40797988 | 1.324172521 | 0.001929278 | 28.25008018 |
| RPL17        | NM_001199345 | 178.2033481 | 14.82105978 | 3.92E-13    | 12.02365761 |
| AVPII        | NM_021732    | 116.1415735 | 6.153890317 | 3.93E-10    | 18.87287025 |
| ARMC3        | NM_001282747 | 44.4478793  | 0.744665878 | 2.80E-05    | 59.68835234 |
| PEX1         | NM_001282677 | 126.5096539 | 0.266524596 | 4.67E-19    | 474.6640875 |
| MAP3K11      | NM_002419    | 101.8558592 | 4.88675263  | 8.71E-10    | 20.84326073 |
| PXMP4        | NM_183397    | 38.99871632 | 0.872655573 | 0.000256401 | 44.68970064 |
| SNX14        | NR_123729    | 109.3667968 | 1.23624545  | 4.01E-11    | 88.46689527 |
| PPP1R8       | NM_014110    | 127.3050222 | 2.849383104 | 3.12E-13    | 44.67809962 |
| NTMT1        | NM_001286798 | 171.4877787 | 9.216503691 | 6.37E-15    | 18.60659795 |
| PHOSPHO1     | NM_178500    | 129.8970423 | 3.22399926  | 3.58E-14    | 40.29065511 |
| PDCD10       | NM_145859    | 135.8764507 | 0.192200509 | 3.66E-21    | 706.9515652 |
| PTEN         | NM_000314    | 98.99871632 | 1.595680941 | 7.28E-10    | 62.04167373 |
| GNG10        | NM_001017998 | 138.7335936 | 5.96531008  | 3.81E-13    | 23.25672793 |
| ITGA3        | NM_002204    | 96.67181894 | 13.46861486 | 3.09E-06    | 7.177562054 |
| NOLC1        | NM_001284389 | 79.5289618  | 8.818474891 | 1.03E-05    | 9.018448517 |
| DHX33        | NM_020162    | 57.93822536 | 2.632212456 | 1.36E-05    | 22.0112268  |
| PRR14        | NM_024031    | 95.87645073 | 12.15166816 | 1.42E-06    | 7.889982633 |
| NEDD1        | NM_152905    | 121.8558592 | 0.480385423 | 6.12E-17    | 253.6626911 |
| FAM72C       | NM_001287385 | 95.93565801 | 7.778857816 | 5.73E-08    | 12.33287203 |
| FAM109A      | NM_144671    | 89.63191953 | 3.116876599 | 2.02E-09    | 28.75696765 |
| FAM134A      | NM_024293    | 72.22393965 | 4.585818347 | 3.51E-06    | 15.74941138 |

|              |              |             |             |             |             |
|--------------|--------------|-------------|-------------|-------------|-------------|
| SLC9A5       | NM_004594    | 73.01930787 | 5.661472296 | 2.28E-06    | 12.89758283 |
| HIP1         | NM_001243198 | 55.34620525 | 0.947809918 | 4.82E-06    | 58.39378148 |
| POLR3H       | NM_001282885 | 80.32433002 | 6.590390885 | 2.95E-06    | 12.18809801 |
| MAFB         | NM_005461    | 58.46847084 | 0.907021772 | 2.54E-07    | 64.46203682 |
| TRMT10C      | NM_017819    | 104.1827566 | 3.628688619 | 1.98E-10    | 28.71085604 |
| MED25        | NM_030973    | 152.2239396 | 1.0825423   | 4.33E-20    | 140.6170822 |
| ALG3         | NM_001006941 | 64.18275656 | 13.74932296 | 0.003079526 | 4.668066694 |
| LIMCH1       | NM_001289122 | 66.24453119 | 0.332102254 | 1.94E-07    | 199.4702848 |
| STARD3NL     | NM_032016    | 95.87645073 | 0.45919096  | 5.68E-13    | 208.7942905 |
| METTLL13     | NM_014955    | 41.85585918 | 0.336920419 | 1.57E-06    | 124.2306991 |
| SF3B6        | NM_016047    | 109.8970423 | 6.955251428 | 4.00E-09    | 15.80058513 |
| TGFBR3       | NM_001195683 | 103.9176338 | 1.019523997 | 2.85E-11    | 101.9275997 |
| STX1A        | NM_004603    | 91.69369417 | 7.355365836 | 2.62E-07    | 12.46623162 |
| ANAPC10      | NM_001256710 | 70.16216501 | 0.328180255 | 6.31E-09    | 213.7915491 |
| STAT6        | NM_001178078 | 73.01930787 | 12.10690814 | 0.000186996 | 6.031210201 |
| LONP1        | NM_004793    | 75.34620525 | 9.644805313 | 6.76E-05    | 7.812102246 |
| PRKAR1A      | NM_212472    | 165.5083703 | 3.118769611 | 1.10E-17    | 53.06848242 |
| APIP         | NM_015957    | 101.060491  | 1.442455628 | 5.47E-11    | 70.06142095 |
| CBX5         | NM_012117    | 83.91763382 | 3.989147822 | 4.28E-07    | 21.03648137 |
| PTER         | NM_030664    | 154.550837  | 2.248803449 | 9.38E-16    | 68.72580931 |
| NDUFB8       | NM_001284368 | 138.9987163 | 9.884386384 | 2.29E-11    | 14.06245273 |
| APOBEC3H     | NM_001166003 | 28.83655131 | 0.163990132 | 0.000553085 | 175.8432111 |
| LOC100289561 | NM_001242713 | 150.4272878 | 2.460359972 | 6.07E-17    | 61.14035729 |
| PSMD8        | NM_002812    | 66.77477667 | 6.630970238 | 3.93E-05    | 10.07013669 |
| KIF3C        | NM_002254    | 34.81595977 | 0.097310661 | 3.97E-05    | 357.7815576 |
| ZNF771       | NM_016643    | 149.1016741 | 11.21800245 | 6.66E-12    | 13.29128557 |
| FAM86B2      | NM_001137610 | 86.77477667 | 4.272887876 | 2.45E-08    | 20.30822694 |
| KHNYN        | NM_001290257 | 150.162165  | 13.2371454  | 2.81E-11    | 11.34399906 |
| DCLRE1B      | NM_022836    | 84.97812478 | 4.805761345 | 1.24E-07    | 17.68255198 |
| LOC101928103 | NR_110292    | 78.2033481  | 0.464712016 | 5.13E-09    | 168.2834646 |
| LRSAM1       | NM_001005373 | 90.16216501 | 3.244307998 | 6.07E-09    | 27.79087715 |
| PDXDC1       | NM_001285448 | 72.54826967 | 3.996956536 | 6.61E-06    | 18.1508778  |
| CCT3         | NM_001008800 | 107.8352676 | 4.438686466 | 5.49E-10    | 24.29440972 |
| CLN3         | NM_001286105 | 49.36679679 | 2.223056669 | 5.57E-05    | 22.20671991 |
| HMGA2        | NM_001300918 | 83.65251108 | 6.540828707 | 7.89E-07    | 12.78928326 |
| DUT          | NM_001025248 | 163.3873883 | 3.725024586 | 2.48E-17    | 43.86209663 |
| MBD1         | NM_001204141 | 67.83526763 | 5.325022794 | 5.43E-06    | 12.73896287 |
| DYNC1I2      | NM_001271787 | 84.71300204 | 0.333308514 | 1.58E-11    | 254.1579303 |
| C11orf80     | NM_024650    | 98.46847084 | 2.387736853 | 2.13E-09    | 41.23924742 |
| TOR2A        | NM_001252018 | 91.69369417 | 1.395184915 | 1.77E-11    | 65.72153496 |
| HOXA1        | NM_153620    | 57.40797988 | 8.567698641 | 0.001087555 | 6.700513439 |
| BRE          | NM_199194    | 105.7142857 | 0.277629259 | 6.18E-12    | 380.7750163 |
| GEMIN7       | NM_001007269 | 136.4066962 | 5.340206734 | 3.39E-13    | 25.54333624 |
| MPP2         | NM_001278376 | 66.77477667 | 1.053999161 | 2.79E-07    | 63.35372852 |
| UST          | NM_005715    | 34.55083703 | 0.004542421 | 5.15E-06    | 7606.260562 |
| ANKRD49      | NM_017704    | 52.48906239 | 2.710366003 | 4.38E-05    | 19.3660422  |
| ACACA        | NM_198834    | 144.4478793 | 1.947171406 | 6.07E-14    | 74.18344317 |
| ZBTB48       | NM_005341    | 104.1827566 | 11.76593428 | 2.51E-07    | 8.854609764 |
| SEC11C       | NM_033280    | 97.67310262 | 0.934351914 | 2.81E-12    | 104.5356692 |
| LINC00441    | NR_046414    | 147.0398994 | 4.534501297 | 6.12E-15    | 32.42691749 |
| ALDH4A1      | NM_170726    | 55.87645073 | 1.562319459 | 9.01E-06    | 35.76506097 |
| STMN3        | NM_015894    | 55.08108251 | 10.82240116 | 0.002780724 | 5.089543594 |
| MYADM        | NM_001290191 | 81.06049096 | 7.48586748  | 5.58E-06    | 10.82846994 |
| THEMIS2      | NM_001105556 | 141.3256137 | 6.414934661 | 5.34E-13    | 22.03071756 |
| VDAC3        | NM_005662    | 138.9987163 | 2.332241719 | 5.46E-16    | 59.59876079 |
| TFSM         | NM_001172695 | 92.48906239 | 1.545571558 | 5.14E-11    | 59.84133306 |
| MORN1        | NM_001301060 | 35.87645073 | 1.65808595  | 0.001707128 | 21.6372684  |
| RABAC1       | NM_006423    | 120.7953682 | 19.3488712  | 9.80E-07    | 6.243018881 |
| AMBRA1       | NM_001300731 | 95.61132799 | 0.689688237 | 1.42E-10    | 138.6297791 |
| NUMB         | NM_001005744 | 90.69241049 | 0.438390512 | 1.22E-10    | 206.8758517 |
| KLK8         | NM_144505    | 77.40797988 | 14.56573555 | 0.000163277 | 5.314388665 |
| LOC100128164 | NR_024409    | 112.2239396 | 2.439969345 | 3.28E-12    | 45.99399574 |
| KCTD14       | NM_023930    | 105.773493  | 6.036000978 | 3.48E-09    | 17.52377002 |
| CSDE1        | NM_001242893 | 83.38738834 | 1.932095217 | 1.91E-08    | 43.15904704 |

|           |              |             |             |             |             |
|-----------|--------------|-------------|-------------|-------------|-------------|
| PQLC3     | NM_152391    | 146.5096539 | 4.676609533 | 2.62E-14    | 31.32817758 |
| ITFG3     | NR_104317    | 61.06049096 | 3.617132125 | 1.01E-05    | 16.88091252 |
| CTSC      | NM_001114173 | 118.4684708 | 1.147974328 | 4.92E-15    | 103.1978398 |
| PPCS      | NM_001287509 | 183.3873883 | 5.921658276 | 4.59E-18    | 30.96892455 |
| SKP2      | NM_001243120 | 132.4890624 | 0.051161828 | 7.86E-22    | 2589.607676 |
| SMPD4     | NM_017951    | 55.61132799 | 5.048283288 | 0.000237091 | 11.01588893 |
| SACM1L    | NM_014016    | 105.9794085 | 0.619804601 | 1.57E-13    | 170.9884185 |
| SPRYD4    | NM_207344    | 61.3256137  | 8.929153519 | 0.001192249 | 6.868020979 |
| APOA1BP   | NM_144772    | 193.2844306 | 26.24191798 | 3.74E-11    | 7.365484137 |
| SLC22A15  | NM_018420    | 82.85714286 | 1.081467065 | 1.88E-09    | 76.61550275 |
| ARFIP2    | NM_001242856 | 140.5302455 | 17.09867417 | 3.30E-09    | 8.218780243 |
| CERCAM    | NM_016174    | 43.91763382 | 5.972554989 | 0.002458379 | 7.353240597 |
| LRRC20    | NM_018239    | 151.9588169 | 0.196594853 | 3.23E-22    | 772.9541979 |
| ZNF3      | NM_001278290 | 87.03989941 | 3.833044627 | 2.32E-08    | 22.70777094 |
| SH2B1     | NM_001145795 | 74.81595977 | 1.388787885 | 3.45E-09    | 53.8714087  |
| CALM3     | NM_005184    | 95.34620525 | 8.387646191 | 2.56E-07    | 11.36745674 |
| GABARAPL1 | NM_031412    | 69.10167405 | 2.874451412 | 1.16E-06    | 24.03995203 |
| NPM2      | NM_001286680 | 32.22393965 | 1.610036819 | 0.003838    | 20.01441163 |
| KIAA1958  | NM_133465    | 75.34620525 | 0.358514069 | 9.52E-09    | 210.1624781 |
| ACCS      | NM_032592    | 103.6525111 | 1.384975494 | 1.74E-12    | 74.84068241 |
| UCHL3     | NM_006002    | 173.0193079 | 0.430717899 | 5.27E-23    | 401.6998322 |
| CYP2S1    | NM_030622    | 122.6512274 | 3.642777801 | 9.19E-13    | 33.66969772 |
| CACNB2    | NM_201596    | 27.03989941 | 0.167109584 | 0.004526955 | 161.8093877 |
| ELP6      | NM_001031703 | 112.2239396 | 4.672325769 | 1.03E-10    | 24.01886024 |
| RPL21     | NM_000982    | 126.2445312 | 8.74218326  | 2.76E-10    | 14.44084703 |
| BAG1      | NM_001172415 | 138.9987163 | 5.354685355 | 1.53E-13    | 25.95833501 |
| NDUFA8    | NM_014222    | 129.6319195 | 0.7823174   | 6.94E-18    | 165.7024624 |
| ORAI2     | NM_001126340 | 48.57142857 | 3.713362746 | 0.000653389 | 13.08017339 |
| COPS7B    | NM_022730    | 96.14157347 | 1.277652195 | 2.27E-11    | 75.24862701 |
| ME2       | NM_001168335 | 136.6718189 | 0.609743738 | 1.92E-17    | 224.1463263 |
| ACOT9     | NM_001037171 | 77.40797988 | 0.830465409 | 1.57E-08    | 93.21036017 |
| FBXW8     | NM_153348    | 81.06049096 | 0.861888861 | 4.14E-09    | 94.04981856 |
| MSANTD2   | NM_001301087 | 78.46847084 | 1.736149311 | 5.22E-08    | 45.19684474 |
| RCAN2     | NM_001251974 | 37.14285714 | 0.100556508 | 0.000128167 | 369.3729821 |
| RUSC2     | NM_014806    | 93.01930787 | 0.47697173  | 5.22E-12    | 195.0205894 |
| G6PC3     | NR_028581    | 115.0810825 | 13.31448315 | 1.16E-07    | 8.643300774 |
| DPYSL2    | NM_001386    | 35.87645073 | 0.376025423 | 0.000140629 | 95.40964138 |
| INPP5J    | NM_001284285 | 80.79536822 | 2.210404923 | 2.80E-08    | 36.55229291 |
| CENPA     | NM_001042426 | 81.06049096 | 4.669940182 | 5.22E-07    | 17.35792918 |
| ENOPH1    | NM_021204    | 87.57014489 | 3.026578329 | 5.49E-09    | 28.93371173 |
| SIGMAR1   | NM_001282207 | 167.5701449 | 15.4897787  | 3.70E-12    | 10.81811097 |
| SLC39A1   | NM_001271957 | 121.3256137 | 10.40292231 | 5.60E-09    | 11.66264729 |
| FAM21C    | NM_001169106 | 70.16216501 | 1.158027258 | 3.63E-07    | 60.58766279 |
| SLC25A22  | NM_001191060 | 110.162165  | 20.10319361 | 7.21E-06    | 5.479834059 |
| P4HA1     | NM_001142595 | 104.1827566 | 0.671648746 | 2.39E-12    | 155.1149425 |
| ZNF621    | NM_001287245 | 163.6525111 | 3.794128288 | 1.05E-16    | 43.13309901 |
| RPL6      | NM_001024662 | 170.162165  | 8.202348116 | 1.01E-15    | 20.74554294 |
| CD47      | NM_198793    | 163.9176338 | 1.121924728 | 6.05E-19    | 146.1039495 |
| IL20RA    | NM_001278722 | 44.4478793  | 1.209603419 | 0.000190276 | 36.74582808 |
| MRPL18    | NM_014161    | 98.2033481  | 4.179458193 | 2.45E-09    | 23.49666956 |
| ZSWIM3    | NR_037628    | 58.2033481  | 0.96365093  | 2.23E-06    | 60.39878785 |
| BTN2A1    | NM_001197234 | 77.40797988 | 3.265247983 | 4.36E-07    | 23.70661594 |
| SEC11A    | NM_001271918 | 140.7953682 | 2.263490499 | 9.18E-15    | 62.20276527 |
| CRYBB2P1  | NR_033733    | 141.060491  | 2.57452752  | 7.64E-16    | 54.79082661 |
| RIOK2     | NM_018343    | 80.05920728 | 0.032685243 | 1.51E-14    | 2449.399193 |
| ADD1      | NM_001119    | 40          | 1.231209481 | 0.000136826 | 32.48837879 |
| POLR3B    | NM_018082    | 175.3462052 | 0.744369151 | 4.01E-20    | 235.5635038 |
| KTN1      | NR_073129    | 62.85714286 | 0.129548678 | 9.13E-09    | 485.2009594 |
| YWHAG     | NM_012479    | 296.1415735 | 5.519550461 | 1.15E-29    | 53.6532052  |
| ZFAND4    | NR_104256    | 85.97940845 | 1.337800943 | 2.60E-09    | 64.26920901 |
| SMIM19    | NM_001135675 | 157.6731026 | 3.81418194  | 1.24E-16    | 41.33864224 |
| LCORL     | NM_001166139 | 83.38738834 | 0.514492249 | 1.10E-09    | 162.0770546 |
| ZSCAN26   | NM_152736    | 121.3256137 | 3.275592072 | 5.04E-13    | 37.03929275 |
| SLC39A9   | NM_018375    | 80.79536822 | 1.009697652 | 2.87E-08    | 80.01936827 |

|              |              |             |             |             |             |
|--------------|--------------|-------------|-------------|-------------|-------------|
| PTBP2        | NM_021190    | 120.7953682 | 1.259061005 | 2.40E-12    | 95.94083826 |
| LOC101929378 | NR_110249    | 63.65251108 | 0.539858402 | 4.42E-07    | 117.9059377 |
| RPP14        | NR_049758    | 155.0810825 | 3.086551312 | 2.84E-17    | 50.24412906 |
| ATXN3        | NM_001164780 | 144.1827566 | 0.950333469 | 1.01E-16    | 151.7180666 |
| ARHGFE2      | NM_001162383 | 55.87645073 | 4.341342884 | 0.000119626 | 12.87077575 |
| EMC3-AS1     | NR_103821    | 95.87645073 | 2.039603645 | 6.76E-11    | 47.0073933  |
| LINC00115    | NR_024321    | 161.3256137 | 26.41253605 | 1.78E-07    | 6.107918353 |
| COG5         | NM_006348    | 43.91763382 | 0.949833321 | 8.95E-05    | 46.23720061 |
| EIF2A        | NM_032025    | 47.03989941 | 1.799026263 | 0.00022881  | 26.14742229 |
| SEPT7P9      | NR_027269    | 75.87645073 | 1.576462138 | 1.34E-08    | 48.1308424  |
| RPL8         | NM_033301    | 163.4465956 | 33.41134936 | 3.02E-07    | 4.891948358 |
| DUS4L        | NM_001270419 | 155.0810825 | 2.456355118 | 9.53E-18    | 63.13463446 |
| KRAS         | NM_004985    | 86.24453119 | 0.389136702 | 9.07E-12    | 221.630421  |
| NAF1         | NM_138386    | 67.83526763 | 0.655296785 | 7.41E-09    | 103.5183891 |
| MAP3K13      | NM_001242317 | 124.713002  | 0.827229788 | 6.32E-14    | 150.7598056 |
| MYD88        | NM_001172568 | 94.55083703 | 7.257744179 | 1.35E-07    | 13.02757919 |
| CXCL3        | NM_002090    | 129.3667968 | 6.609487185 | 3.83E-11    | 19.57289472 |
| GBX1         | NM_001098834 | 26.77477667 | 0.551531845 | 0.001747383 | 48.54620255 |
| EIF3C        | NM_001267574 | 191.7529015 | 11.56103827 | 2.62E-15    | 16.58613153 |
| LMNB1        | NM_005573    | 135.8764507 | 2.634331553 | 5.91E-14    | 51.57910005 |
| MRPL40       | NM_003776    | 184.1827566 | 9.648485285 | 4.68E-16    | 19.08929237 |
| GRB7         | NM_005310    | 106.5096539 | 10.11856034 | 1.02E-07    | 10.5261668  |
| BSCL2        | NM_001130702 | 154.8159598 | 5.863835833 | 1.38E-14    | 26.40182368 |
| GCH1         | NM_000161    | 205.2432475 | 2.435938383 | 7.66E-22    | 84.25633791 |
| LOC729683    | NR_046273    | 49.36679679 | 1.234065677 | 3.43E-05    | 40.00337884 |
| SMPD1        | NM_001007593 | 63.1222656  | 2.141849476 | 4.27E-07    | 29.47091582 |
| EIF6         | NM_001267810 | 80.79536822 | 7.610007145 | 2.86E-06    | 10.6169898  |
| SCAMP1-AS1   | NR_105014    | 121.060491  | 24.45058599 | 2.13E-05    | 4.951230658 |
| ORC5         | NM_181747    | 198.2033481 | 0.121484481 | 7.96E-32    | 1631.511673 |
| CDK5RAP1     | NM_001278169 | 143.1222656 | 1.965507412 | 1.72E-15    | 72.81695542 |
| LINC01123    | NR_046110    | 215.3462052 | 51.65930352 | 5.80E-09    | 4.168585145 |
| CRYBG3       | NM_153605    | 206.7747767 | 0.457268542 | 3.61E-26    | 452.1954991 |
| COL13A1      | NM_080802    | 115.0810825 | 0.389944956 | 9.06E-14    | 295.1213514 |
| OIP5         | NM_007280    | 132.7541851 | 1.899815321 | 3.07E-15    | 69.8774158  |
| RLIM         | NM_183353    | 66.77477667 | 1.443999781 | 7.87E-07    | 46.24292715 |
| ASH2L        | NM_001105214 | 47.57014489 | 1.868919903 | 0.000106183 | 25.45328177 |
| SCFD1        | NM_182835    | 166.7747767 | 0.737818489 | 1.10E-19    | 226.0376762 |
| ZNF774       | NM_001004309 | 115.8764507 | 2.710667715 | 1.95E-13    | 42.74830518 |
| C14orf159    | NM_001102368 | 78.73359358 | 2.824600386 | 1.49E-07    | 27.8742416  |
| RTCA         | NM_001130841 | 87.30502215 | 2.185296688 | 2.14E-09    | 39.95110715 |
| SNX21        | NM_152897    | 124.713002  | 5.385900108 | 2.92E-12    | 23.1554614  |
| ST7L         | NM_138728    | 61.06049096 | 1.189014777 | 8.57E-07    | 51.35385374 |
| CCDC63       | NM_001286243 | 87.03989941 | 1.506266411 | 1.13E-08    | 57.78519576 |
| HIPK1-AS1    | NR_110726    | 89.89704227 | 0.442174811 | 4.24E-13    | 203.3065659 |
| ZNF341       | NM_001282933 | 26.77477667 | 0.766521234 | 0.004097075 | 34.93024783 |
| GK5          | NR_033289    | 209.6319195 | 0.556013502 | 1.95E-26    | 377.0266707 |
| MIS12        | NM_001258218 | 69.36679679 | 10.68578474 | 0.000177951 | 6.491502351 |
| RASGRP1      | NM_005739    | 32.22393965 | 0.908449059 | 0.001059661 | 35.47137766 |
| PANK2        | NM_153640    | 49.89704227 | 1.714328277 | 9.87E-05    | 29.10588535 |
| DDX52        | NM_001291476 | 120.7953682 | 3.384252796 | 2.34E-11    | 35.69336438 |
| CHCHD4       | NM_001098502 | 103.1222656 | 1.305493695 | 3.00E-13    | 78.99101004 |
| CCDC120      | NM_001163323 | 86.24453119 | 3.921480424 | 2.07E-08    | 21.99285011 |
| PTPRG        | NM_002841    | 112.4890624 | 1.017943616 | 9.50E-12    | 110.5061819 |
| MFF          | NM_001277064 | 78.2033481  | 0.95509281  | 1.34E-08    | 81.88036522 |
| VAV2         | NM_001134398 | 123.6525111 | 0.520573426 | 6.09E-14    | 237.5313546 |
| BAHCC1       | NM_001291324 | 35.08108251 | 1.360335282 | 0.003718699 | 25.78855593 |
| ARL17A       | NM_001288811 | 38.46847084 | 2.682789666 | 0.002122683 | 14.3389813  |
| ZMAT1        | NM_001011657 | 105.7142857 | 1.00639717  | 1.11E-11    | 105.0423122 |
| ESR2         | NM_001291712 | 126.2445312 | 0.727051717 | 8.93E-15    | 173.6389973 |
| GM2A         | NM_001167607 | 57.93822536 | 3.262912963 | 6.38E-05    | 17.75659542 |
| ASNSD1       | NM_019048    | 123.3873883 | 0.845656827 | 9.96E-17    | 145.9071628 |
| C14orf166    | NM_016039    | 72.22393965 | 2.650072644 | 1.22E-07    | 27.25356975 |
| SETMAR       | NR_075073    | 47.03989941 | 4.677419025 | 0.001074381 | 10.05680679 |
| SPA17        | NM_017425    | 60.79536822 | 1.521981583 | 2.13E-06    | 39.94487772 |

|           |              |             |             |             |             |
|-----------|--------------|-------------|-------------|-------------|-------------|
| SDC1      | NM_002997    | 108.8365513 | 6.288754004 | 4.91E-09    | 17.30653659 |
| RREB1     | NM_001003700 | 49.36679679 | 2.049542663 | 0.000196677 | 24.08673783 |
| TM9SF2    | NM_004800    | 67.57014489 | 0.448184681 | 9.70E-09    | 150.7640662 |
| GCDH      | NM_013976    | 61.85585918 | 1.299317979 | 8.71E-08    | 47.60640597 |
| SEC1P     | NR_004401    | 88.83655131 | 3.564907183 | 1.13E-08    | 24.91973753 |
| DEK       | NM_003472    | 123.9176338 | 1.796928002 | 2.77E-13    | 68.96082297 |
| TRPM7     | NM_001301212 | 151.6936942 | 1.036710429 | 9.36E-16    | 146.3221455 |
| NXNL2     | NM_145283    | 72.75418513 | 0.278851179 | 2.62E-10    | 260.9068583 |
| PMS2P4    | NR_046299    | 143.9176338 | 0.932246764 | 2.69E-18    | 154.3771878 |
| SMARCC2   | NM_139067    | 74.55083703 | 5.783315924 | 2.67E-06    | 12.89067345 |
| ANAPC1    | NM_022662    | 123.6525111 | 0.950765978 | 5.00E-14    | 130.055675  |
| PDIK1L    | NM_001243533 | 82.12098192 | 3.096476533 | 4.61E-08    | 26.52078291 |
| MTMR12    | NM_001294344 | 135.8764507 | 0.402017823 | 5.45E-18    | 337.9861361 |
| EXOSC5    | NM_020158    | 43.91763382 | 5.332356663 | 0.001937223 | 8.236064576 |
| ARRB2     | NM_001257331 | 69.10167405 | 2.8773985   | 1.33E-06    | 24.01532984 |
| ISCA1     | NM_030940    | 130.162165  | 5.245169035 | 5.85E-12    | 24.81562827 |
| OASL      | NM_003733    | 54.81595977 | 2.248824848 | 1.62E-05    | 24.3753798  |
| FLAD1     | NM_025207    | 63.91763382 | 9.280313228 | 0.000386813 | 6.887443586 |
| TINAGL1   | NM_022164    | 100.2651227 | 4.421367097 | 3.74E-09    | 22.67740284 |
| LOC642846 | NR_024374    | 75.34620525 | 2.489252533 | 1.69E-07    | 30.26860643 |
| ICA1      | NM_001276478 | 97.93822536 | 0.382183976 | 1.08E-11    | 256.2593712 |
| TMEM263   | NM_152261    | 117.2020644 | 5.622597771 | 2.82E-10    | 20.84482462 |
| MPP3      | NM_001932    | 120.5302455 | 1.859205612 | 3.30E-13    | 64.82889504 |
| PSD       | NM_001270965 | 51.48777871 | 9.86538948  | 0.004932914 | 5.219031526 |
| SEPT7P2   | NR_024271    | 100.5302455 | 1.630288768 | 1.61E-10    | 61.66407293 |
| TRIM23    | NM_033228    | 87.57014489 | 0.175202839 | 4.70E-14    | 499.8214945 |
| HELLS     | NM_001289074 | 106.5096539 | 2.31153444  | 1.18E-10    | 46.07746788 |
| TBC1D13   | NM_018201    | 126.5096539 | 1.648699786 | 9.11E-15    | 76.73298378 |
| DBR1      | NM_016216    | 163.3873883 | 2.248198183 | 2.79E-19    | 72.67481558 |
| NOP14     | NM_001291979 | 77.93822536 | 5.666169386 | 1.26E-06    | 13.75501155 |
| FAM160A1  | NM_001109977 | 60.79536822 | 0.063188782 | 4.14E-08    | 962.1228058 |
| CETN3     | NM_001297765 | 154.550837  | 3.29307801  | 1.05E-16    | 46.93203033 |
| SZRD1     | NR_073500    | 45.97940845 | 2.291602099 | 0.000230714 | 20.06430718 |
| NMNAT1    | NM_022787    | 142.3861047 | 2.036788497 | 1.89E-15    | 69.90716262 |
| POLL      | NM_013274    | 124.9781248 | 6.748631248 | 4.37E-11    | 18.519033   |
| STRADA    | NM_001165969 | 181.8558592 | 3.241487812 | 2.52E-18    | 56.10258922 |
| RASSF5    | NM_182663    | 67.03989941 | 0.438302862 | 4.02E-08    | 152.953369  |
| METTL2B   | NM_018396    | 90.16216501 | 2.861802039 | 1.71E-09    | 31.5053815  |
| VAMP2     | NM_014232    | 67.83526763 | 6.668404887 | 1.89E-05    | 10.1726378  |
| TRAPPC1   | NM_021210    | 115.611328  | 7.13121275  | 4.00E-09    | 16.21201499 |
| KIF1B     | NM_015074    | 54.81595977 | 0.67203508  | 3.73E-06    | 81.56711068 |
| ZNF207    | NM_003457    | 161.3256137 | 4.16946547  | 1.88E-16    | 38.69215727 |
| MAP3K4    | NM_001291958 | 109.3667968 | 0.314078665 | 9.85E-14    | 348.2146637 |
| MYZAP     | NM_152451    | 83.1222656  | 0.621697019 | 6.96E-10    | 133.7022104 |
| NDUFC1    | NM_002494    | 102.3861047 | 7.428161355 | 3.56E-08    | 13.78350574 |
| C2orf68   | NM_001013649 | 129.6319195 | 11.12265781 | 9.28E-10    | 11.65476109 |
| CTNND1    | NM_001085462 | 72.48906239 | 2.922433015 | 7.80E-07    | 24.80435378 |
| CHEK2     | NM_145862    | 109.3667968 | 1.040214056 | 7.00E-12    | 105.1387416 |
| ALKBH5    | NM_017758    | 58.46847084 | 2.891480187 | 1.39E-05    | 20.22094812 |
| GEMIN2    | NM_001009183 | 110.6924105 | 0.475299566 | 2.43E-15    | 232.889778  |
| IMMP2L    | NM_001244606 | 200.7953682 | 0.070619193 | 5.90E-25    | 2843.354047 |
| FHL2      | NM_001450    | 77.67310262 | 2.554036604 | 1.13E-07    | 30.41189876 |
| HERC6     | NM_017912    | 52.75418513 | 0.901015025 | 4.69E-06    | 58.54972854 |
| ILK       | NM_004517    | 149.6319195 | 12.0494045  | 4.45E-11    | 12.41820038 |
| AREG      | NM_001657    | 298.2033481 | 24.15721398 | 3.68E-21    | 12.3442773  |
| RCAN1     | NM_004414    | 29.10167405 | 0.412370451 | 0.001848375 | 70.57167644 |
| TECR      | NM_138501    | 184.713002  | 3.341016692 | 9.66E-19    | 55.28646488 |
| DCLRE1C   | NM_001033855 | 130.4272878 | 1.501921891 | 2.76E-14    | 86.84026017 |
| CD99L2    | NM_001242614 | 86.50965393 | 0.399537982 | 2.50E-10    | 216.5242301 |
| ZNF133    | NM_001282997 | 58.2033481  | 0.432965631 | 5.52E-08    | 134.4294879 |
| MBD4      | NM_003925    | 64.71300204 | 3.318463093 | 2.79E-06    | 19.50089551 |
| KIAA0141  | NM_001142603 | 187.5701449 | 2.295799333 | 4.85E-22    | 81.70145456 |
| MAP2K7    | NM_001297556 | 75.08108251 | 6.350387837 | 5.59E-06    | 11.82307041 |
| DCAF6     | NM_001017977 | 63.38738834 | 1.374687753 | 6.43E-06    | 46.11038992 |

|          |              |             |             |             |             |
|----------|--------------|-------------|-------------|-------------|-------------|
| DYNC1LI2 | NM_006141    | 120.2651227 | 4.000018624 | 2.79E-11    | 30.0661407  |
| TRIP6    | NM_003302    | 44.4478793  | 6.715471214 | 0.002793869 | 6.618728289 |
| ARNT     | NM_001286036 | 49.63191953 | 0.318352571 | 2.96E-06    | 155.9023675 |
| CYB5A    | NM_001190807 | 52.75418513 | 1.117851349 | 3.58E-05    | 47.1924869  |
| GDA      | NM_001242506 | 109.6319195 | 1.793442128 | 9.96E-11    | 61.12933216 |
| ATXN7L3B | NM_001136262 | 171.4285714 | 9.083619745 | 1.43E-14    | 18.87227518 |
| PAK2     | NM_002577    | 83.65251108 | 0.683601454 | 8.24E-10    | 122.3702943 |
| TMEM138  | NM_016464    | 112.2239396 | 6.461670678 | 8.84E-10    | 17.36763528 |
| NKIRAS2  | NM_001144928 | 121.060491  | 4.47680776  | 4.98E-12    | 27.04169968 |
| NRF1     | NM_005011    | 63.38738834 | 1.442043032 | 6.70E-06    | 43.9566552  |
| ZNF160   | NM_198893    | 112.2239396 | 0.12966024  | 2.60E-18    | 865.5231516 |
| DUOX1    | NM_017434    | 127.5701449 | 4.894418544 | 6.82E-12    | 26.06441271 |
| CEBPZ    | NM_005760    | 119.2638391 | 2.557509287 | 7.32E-13    | 46.63280781 |
| CAPRIN2  | NR_038177    | 61.06049096 | 0.802687396 | 2.20E-07    | 76.07007564 |
| CYTH1    | NM_017456    | 57.93822536 | 0.706967769 | 1.30E-06    | 81.95313555 |
| GTF2H3   | NM_001271868 | 109.3667968 | 3.987399102 | 4.36E-10    | 27.42810389 |
| U2AF1    | NM_006758    | 101.060491  | 3.664748037 | 6.54E-10    | 27.57638177 |
| ITPKA    | NM_002220    | 68.83655131 | 4.064166098 | 1.95E-06    | 16.93743554 |
| LEPRE1   | NM_022356    | 135.611328  | 4.031256957 | 2.15E-13    | 33.63996129 |
| RBM6     | NM_005777    | 141.3256137 | 2.052508031 | 9.04E-14    | 68.85508438 |
| THAP5    | NM_001130475 | 135.611328  | 4.122939064 | 1.74E-13    | 32.89190694 |
| TINCR    | NR_027064    | 43.65251108 | 0.313951323 | 7.62E-06    | 139.0422905 |
| ZBTB6    | NM_006626    | 89.89704227 | 2.944418332 | 2.57E-09    | 30.53134172 |
| GEN1     | NM_001130009 | 58.46847084 | 1.116089137 | 5.78E-06    | 52.38691867 |
| B4GALT5  | NM_004776    | 40.26512274 | 3.660148768 | 0.001331066 | 11.0009525  |
| PEX14    | NM_004565    | 55.08108251 | 0.493066734 | 2.80E-06    | 111.7112122 |
| HNRNPUL2 | NM_001079559 | 138.9987163 | 5.117692534 | 2.74E-13    | 27.16042736 |
| HTRA2    | NM_013247    | 131.222656  | 14.70777667 | 1.28E-08    | 8.921991334 |
| IFT43    | NR_045664    | 58.99871632 | 0.463935616 | 3.14E-07    | 127.1700519 |
| TMTC4    | NM_001079669 | 74.81595977 | 1.301592918 | 2.20E-07    | 57.48030644 |
| NF2      | NM_181831    | 104.713002  | 2.058900149 | 1.73E-10    | 50.85870826 |
| LYSMD3   | NM_001286812 | 120.7953682 | 3.819989777 | 2.26E-12    | 31.62190877 |
| DDIT3    | NM_001195055 | 181.060491  | 20.84311048 | 1.20E-11    | 8.68682681  |
| LIFR     | NM_001127671 | 137.1428571 | 0.347562944 | 1.80E-18    | 394.5842319 |
| FAM178A  | NM_018121    | 172.7541851 | 1.696295549 | 7.49E-19    | 101.8420317 |
| TIMELESS | NM_003920    | 157.2020644 | 2.404339529 | 2.42E-17    | 65.3826394  |
| POMP     | NM_015932    | 143.9176338 | 3.540571664 | 1.11E-14    | 40.64813467 |
| MAP3K6   | NM_001297609 | 118.4684708 | 13.78053428 | 7.50E-08    | 8.596798095 |
| RPL7A    | NM_000972    | 161.3256137 | 17.1409496  | 7.34E-11    | 9.411708073 |
| DRG2     | NM_001388    | 116.4066962 | 3.67220305  | 1.56E-11    | 31.69941711 |
| AKAP17A  | NM_005088    | 68.57142857 | 2.366743171 | 8.48E-07    | 28.97290648 |
| ZNF485   | NM_145312    | 41.06049096 | 0.58566355  | 8.62E-05    | 70.10935021 |
| ZNF460   | NM_006635    | 68.83655131 | 0.214324583 | 3.10E-10    | 321.1789817 |
| ARF1     | NM_001024226 | 78.99871632 | 6.821172362 | 2.70E-06    | 11.58139864 |
| FBXL18   | NM_024963    | 59.79408454 | 0.862710711 | 1.80E-07    | 69.3095423  |
| SETD1A   | NM_014712    | 60.79536822 | 3.131453281 | 7.56E-06    | 19.41442607 |
| PLGRKT   | NM_018465    | 167.0398994 | 1.20480248  | 5.37E-18    | 138.6450494 |
| TADA2A   | NM_001291918 | 60.26512274 | 2.456666768 | 1.09E-05    | 24.53125654 |
| ARL2     | NM_001667    | 83.65251108 | 9.461779751 | 3.68E-06    | 8.841096842 |
| SH3BGRL  | NM_003022    | 29.10167405 | 0.05584293  | 0.000325278 | 521.1344396 |
| MYLK     | NM_053026    | 49.10167405 | 0.523683386 | 1.76E-05    | 93.76213833 |
| KAT8     | NM_032188    | 120.7953682 | 5.663354077 | 6.35E-11    | 21.32929825 |
| PECR     | NM_018441    | 152.7541851 | 1.311705751 | 2.55E-17    | 116.4546127 |
| PPA2     | NM_176867    | 172.7541851 | 1.397876483 | 6.51E-18    | 123.5832974 |
| NT5C2    | NM_012229    | 108.8365513 | 1.601972001 | 8.73E-11    | 67.93910956 |
| ADARB1   | NR_073200    | 25.71428571 | 0.024513445 | 0.000726545 | 1048.987009 |
| SARAF    | NM_001284239 | 103.3873883 | 2.030243688 | 1.22E-11    | 50.92363489 |
| NEDD4    | NM_006154    | 78.73359358 | 0.392395222 | 1.98E-09    | 200.6487063 |
| TMEM106C | NM_001143843 | 138.7335936 | 5.918085074 | 1.96E-13    | 23.44231147 |
| DNAJB14  | NM_001278310 | 80.79536822 | 1.193601574 | 2.55E-08    | 67.6904002  |
| NFS1     | NR_037570    | 118.9987163 | 0.837021028 | 7.48E-15    | 142.169327  |
| CXorf38  | NM_144970    | 69.10167405 | 1.508498615 | 1.74E-07    | 45.80824493 |
| TSPAN4   | NM_001025239 | 48.83655131 | 8.29540987  | 0.003106083 | 5.887177617 |
| RCN2     | NM_002902    | 75.34620525 | 3.456181288 | 9.88E-07    | 21.80042045 |

|            |              |             |             |             |             |
|------------|--------------|-------------|-------------|-------------|-------------|
| AMMECR1L   | NM_001199140 | 60.79536822 | 2.712386661 | 5.85E-06    | 22.41397552 |
| RBL1       | NM_002895    | 130.162165  | 0.739145297 | 1.19E-15    | 176.0982118 |
| CDPF1      | NM_207327    | 167.3050222 | 4.462947617 | 1.35E-17    | 37.48756125 |
| MTUS1      | NM_001001925 | 51.95881691 | 1.643761263 | 0.000100086 | 31.60971004 |
| CLK2       | NM_003993    | 68.83655131 | 5.193072902 | 1.73E-05    | 13.25545638 |
| C1orf216   | NM_152374    | 103.6525111 | 14.6980038  | 1.77E-06    | 7.052148883 |
| HLCS       | NM_001242785 | 33.28443061 | 0.629999423 | 0.000626331 | 52.8324779  |
| SERGEF     | NR_104040    | 89.36679679 | 0.708374474 | 7.57E-10    | 126.1575623 |
| KDM2A      | NM_012308    | 95.08108251 | 2.147256295 | 5.08E-09    | 44.2802672  |
| ZNF592     | NM_014630    | 62.85714286 | 0.252370298 | 1.33E-08    | 249.0671179 |
| ALDH3A2    | NM_000382    | 129.8970423 | 1.182592297 | 2.14E-15    | 109.8409339 |
| AARS       | NM_001605    | 155.3462052 | 4.206987636 | 8.93E-15    | 36.9257575  |
| SAMM50     | NM_015380    | 47.03989941 | 1.164263858 | 0.000176498 | 40.40312606 |
| VDAC1      | NM_003374    | 151.9588169 | 5.503211357 | 2.74E-14    | 27.61275318 |
| GCAT       | NM_014291    | 137.9382254 | 7.219229726 | 2.26E-12    | 19.10705582 |
| FLYWCH2    | NM_001142499 | 92.48906239 | 4.254372576 | 1.29E-08    | 21.73976556 |
| GLIPR1L2   | NM_152436    | 58.99871632 | 0.288168074 | 9.48E-09    | 204.7371714 |
| STX16      | NR_037942    | 138.7335936 | 3.013686501 | 4.99E-14    | 46.03451406 |
| CKLF       | NM_001040138 | 58.2033481  | 3.89372714  | 5.92E-05    | 14.94797812 |
| EAF1       | NM_033083    | 101.8558592 | 0.123085397 | 9.71E-17    | 827.5218784 |
| ZNF397     | NM_032347    | 164.1827566 | 4.324410276 | 5.03E-16    | 37.96650782 |
| ZSCAN32    | NM_001284529 | 112.7541851 | 2.35119694  | 1.46E-11    | 47.95607854 |
| DDX21      | NM_001256910 | 50.16216501 | 2.822977364 | 6.10E-05    | 17.76924096 |
| RRBP1      | NM_001042576 | 152.2239396 | 2.206269658 | 1.35E-15    | 68.99607176 |
| ULK1       | NM_003565    | 51.42857143 | 2.275795323 | 5.18E-05    | 22.59806535 |
| CDIP1      | NM_001199056 | 45.71428571 | 0.68262754  | 6.21E-06    | 66.96812397 |
| STRAP      | NM_007178    | 90.16216501 | 2.334547097 | 6.53E-10    | 38.6208379  |
| YBX1       | NM_004559    | 46.24453119 | 3.665578464 | 0.001144113 | 12.61588905 |
| TTC9       | NM_015351    | 42.85714286 | 2.335364009 | 0.000486081 | 18.35137593 |
| B9D2       | NM_030578    | 104.713002  | 4.298907332 | 4.62E-10    | 24.35805053 |
| NUP50-AS1  | NR_038956    | 168.8365513 | 1.48703552  | 2.86E-20    | 113.5390171 |
| CCDC71L    | NM_175884    | 83.91763382 | 12.10218391 | 2.58E-05    | 6.934090113 |
| UBE2B      | NM_003337    | 83.91763382 | 5.14324106  | 2.35E-07    | 16.31609968 |
| HMGB2      | NM_002129    | 98.99871632 | 12.27217294 | 1.93E-06    | 8.066926439 |
| CXADR      | NM_001207065 | 113.0193079 | 1.687657103 | 6.67E-12    | 66.96817006 |
| LMCD1-AS1  | NR_033378    | 62.12098192 | 0.400933231 | 4.03E-07    | 154.9409657 |
| PEX5       | NM_001131024 | 80.53024548 | 2.128897068 | 1.48E-08    | 37.82721425 |
| CCPG1      | NM_001204451 | 35.61132799 | 0.930877556 | 0.000432663 | 38.25565215 |
| PGAP1      | NM_024989    | 175.0810825 | 0.058553122 | 2.17E-29    | 2990.123802 |
| GPATCH4    | NM_015590    | 86.77477667 | 12.58589872 | 3.01E-05    | 6.894603125 |
| PPP2R5C    | NM_178587    | 78.46847084 | 0.573185928 | 3.71E-09    | 136.898809  |
| EML4       | NM_001145076 | 117.4079799 | 0.420825452 | 5.96E-14    | 278.9944838 |
| NME1-NME2  | NR_037149    | 262.1209819 | 25.03310625 | 5.14E-18    | 10.47097309 |
| MCMBP      | NM_024834    | 136.1415735 | 2.175026291 | 1.33E-14    | 62.59307026 |
| PSMB6      | NM_002798    | 104.1827566 | 8.852370576 | 1.28E-07    | 11.76891045 |
| LOC652276  | NR_015441    | 198.4684708 | 1.737823616 | 4.87E-24    | 114.2051869 |
| DBF4B      | NR_036623    | 61.59073644 | 1.483835015 | 2.65E-06    | 41.50780633 |
| RBPMS      | NM_001008711 | 58.73359358 | 0.676149697 | 9.25E-07    | 86.86477839 |
| ABCB10     | NM_012089    | 95.08108251 | 0.25308075  | 5.99E-14    | 375.6946448 |
| ATP1A1-AS1 | NR_024125    | 80.79536822 | 8.023258603 | 2.65E-06    | 10.07014384 |
| INO80      | NM_017553    | 57.67310262 | 1.155257112 | 2.17E-06    | 49.92230908 |
| ITPRIPL1   | NM_001163523 | 121.060491  | 3.969328184 | 4.19E-12    | 30.49898757 |
| LEPR       | NM_001003679 | 97.93822536 | 0.524875809 | 4.99E-11    | 186.5931399 |
| ATP6V1E1   | NM_001696    | 32.48906239 | 1.053005065 | 0.000822358 | 30.85366203 |
| ZBTB21     | NM_001098403 | 117.6731026 | 4.478280525 | 4.00E-11    | 26.27640273 |
| DGCR5      | NR_110533    | 117.4079799 | 0.317353291 | 2.04E-16    | 369.9598629 |
| SUPT4H1    | NR_073470    | 105.2432475 | 2.884271316 | 3.00E-11    | 36.48867807 |
| HDAC10     | NM_001159286 | 124.4478793 | 16.49389807 | 6.19E-08    | 7.545085991 |
| NKX3-1     | NM_006167    | 172.7541851 | 5.646165343 | 5.52E-17    | 30.59672798 |
| FAM86C1    | NM_018172    | 117.6731026 | 3.145201912 | 2.28E-12    | 37.41352889 |
| PPME1      | NM_016147    | 54.81595977 | 1.387155496 | 3.82E-05    | 39.51680971 |
| MAPK14     | NM_001315    | 83.91763382 | 0.746873447 | 7.98E-10    | 112.3585718 |
| TYW3       | NM_138467    | 74.55083703 | 1.151728097 | 5.04E-08    | 64.72954616 |
| ALS2       | NM_001135745 | 53.28443061 | 0.545068988 | 1.50E-07    | 97.75722306 |

|           |              |             |             |             |             |
|-----------|--------------|-------------|-------------|-------------|-------------|
| PRCP      | NM_199418    | 127.8352676 | 0.434630987 | 7.68E-17    | 294.1236856 |
| EFCAB11   | NM_001284268 | 67.30502215 | 0.526205697 | 2.24E-09    | 127.906297  |
| EP400     | NM_015409    | 89.63191953 | 0.776045636 | 4.07E-10    | 115.4982585 |
| LRIF1     | NM_018372    | 115.3462052 | 0.976241927 | 5.59E-15    | 118.1533    |
| WDR91     | NM_014149    | 120.2651227 | 1.488659846 | 7.40E-14    | 80.78751038 |
| SRSF3     | NM_003017    | 205.9794085 | 9.120915237 | 4.56E-18    | 22.58319512 |
| SNRPD3    | NM_004175    | 139.2638391 | 3.685953731 | 2.47E-14    | 37.78230798 |
| CYB561D2  | NR_111912    | 108.6306359 | 6.490029182 | 2.97E-09    | 16.73808126 |
| ALOX5     | NM_001256154 | 51.95881691 | 0.811105508 | 4.69E-06    | 64.05925791 |
| CLINT1    | NM_014666    | 95.08108251 | 0.931182138 | 3.84E-11    | 102.1079321 |
| ARL5A     | NM_001037174 | 158.7335936 | 1.648945548 | 4.90E-19    | 96.2636964  |
| HMMR      | NM_012485    | 71.69369417 | 0.802351892 | 4.47E-08    | 89.35442775 |
| SLC9A7    | NM_001257291 | 88.83655131 | 0.697001063 | 4.71E-10    | 127.4554028 |
| KIF3B     | NM_004798    | 62.12098192 | 1.055481893 | 2.09E-07    | 58.85556382 |
| RBM14     | NM_001198836 | 187.3050222 | 6.688038011 | 7.85E-18    | 28.00597452 |
| 2-Mar     | NM_001005416 | 72.22393965 | 3.380684641 | 3.01E-06    | 21.36370212 |
| PIGP      | NM_153681    | 103.6525111 | 2.782837787 | 7.49E-11    | 37.24705462 |
| COA6      | NM_001206641 | 110.4272878 | 6.783703987 | 2.88E-09    | 16.27831756 |
| SHC1      | NM_183001    | 120.7953682 | 9.728714676 | 2.27E-09    | 12.41637485 |
| FAM91A1   | NM_144963    | 67.83526763 | 1.702760924 | 7.99E-07    | 39.83839814 |
| SMIM12    | NM_138428    | 127.0398994 | 6.556875636 | 4.13E-11    | 19.37506619 |
| EIF2AK2   | NM_002759    | 94.28571429 | 2.418709379 | 2.03E-09    | 38.98182854 |
| AFTPH     | NM_017657    | 110.162165  | 0.202364885 | 3.34E-16    | 544.3739164 |
| RMND5A    | NM_022780    | 103.6525111 | 1.002314751 | 3.96E-11    | 103.4131355 |
| ADM2      | NM_024866    | 57.67310262 | 8.794847994 | 0.00068545  | 6.557600843 |
| SNRPB2    | NM_003092    | 121.060491  | 1.052696605 | 2.27E-15    | 115.0003623 |
| DCTPP1    | NM_024096    | 61.3256137  | 8.398737432 | 0.000457394 | 7.301765794 |
| RHOC      | NM_175744    | 99.5289618  | 23.24086371 | 0.000149624 | 4.282498407 |
| KIF14     | NM_014875    | 64.18275656 | 0.361397017 | 4.56E-08    | 177.5962542 |
| RNF185    | NR_024212    | 61.3256137  | 2.277278549 | 8.98E-06    | 26.92934236 |
| CHPF2     | NM_019015    | 86.24453119 | 7.283901039 | 7.24E-07    | 11.84043149 |
| DHRS4-AS1 | NR_023923    | 153.0193079 | 3.438347281 | 9.56E-17    | 44.50373839 |
| PTAR1     | NM_001099666 | 129.3667968 | 0.352919221 | 2.68E-18    | 366.5620606 |
| RTN4      | NM_020532    | 117.9382254 | 1.900732088 | 8.22E-12    | 62.04884219 |
| ZNF251    | NM_138367    | 142.1209819 | 0.999128713 | 2.16E-17    | 142.244918  |
| KIAA0556  | NM_015202    | 93.01930787 | 0.938079383 | 2.50E-10    | 99.15931374 |
| ARHGEF1   | NM_004706    | 67.30502215 | 6.346861456 | 4.50E-05    | 10.60445743 |
| C17orf53  | NM_001171251 | 53.54955335 | 3.940232511 | 0.000169555 | 13.59045518 |
| SERINC2   | NM_178865    | 86.50965393 | 3.437525584 | 6.61E-08    | 25.16625748 |
| PIH1D2    | NM_001082619 | 130.6924105 | 4.796675636 | 4.71E-13    | 27.24645576 |
| MAPRE1    | NM_012325    | 94.55083703 | 4.134806629 | 1.78E-08    | 22.86705172 |
| NRSN2-AS1 | NR_109990    | 120.5302455 | 13.7556385  | 3.11E-08    | 8.762242876 |
| LOC202181 | NR_026921    | 69.10167405 | 0.869146917 | 2.74E-08    | 79.50517076 |
| ECD       | NM_001135753 | 118.4684708 | 1.010837643 | 7.96E-14    | 117.1983173 |
| REXO4     | NM_001279350 | 169.6319195 | 3.336115124 | 2.32E-18    | 50.84714203 |
| RAC1      | NM_006908    | 34.55083703 | 2.389433932 | 0.003555657 | 14.45984196 |
| SIAE      | NM_170601    | 92.48906239 | 2.52286766  | 2.75E-09    | 36.66029093 |
| HAUS6     | NM_001270890 | 78.99871632 | 1.352035445 | 3.11E-08    | 58.42947138 |
| ARHGEF26  | NM_001251963 | 203.6525111 | 1.362272861 | 4.64E-21    | 149.4946548 |
| KIF24     | NM_194313    | 58.46847084 | 0.565549037 | 6.71E-07    | 103.3835566 |
| MPPE1     | NR_040243    | 90.16216501 | 2.871587685 | 1.62E-09    | 31.39801911 |
| SART1     | NM_005146    | 47.30502215 | 1.774300972 | 5.57E-05    | 26.66121639 |
| PAFAH1B2  | NR_110269    | 97.93822536 | 4.652774627 | 1.19E-08    | 21.04942388 |
| ZNF789    | NM_213603    | 93.01930787 | 4.865567591 | 6.48E-09    | 19.11787394 |
| ETF1      | NM_004730    | 74.34492157 | 3.080571813 | 2.79E-07    | 24.13348108 |
| FLVCR1    | NM_014053    | 109.6319195 | 1.078817649 | 3.10E-12    | 101.6222896 |
| ODF2L     | NM_020729    | 98.73359358 | 0.735321229 | 1.65E-11    | 134.2727364 |
| HOMEZ     | NM_020834    | 110.162165  | 6.921276015 | 7.73E-10    | 15.91645309 |
| AIFM1     | NM_145812    | 43.38738834 | 1.462363933 | 0.000391331 | 29.66935068 |
| PSMG3     | NM_001134340 | 223.6525111 | 18.71417086 | 1.46E-15    | 11.95097088 |
| GPATCH8   | NM_001002909 | 127.3050222 | 0.842217153 | 5.85E-15    | 151.15463   |
| POP1      | NM_001145860 | 191.9588169 | 3.100165542 | 3.11E-19    | 61.91889249 |
| SLC11A2   | NM_001174129 | 73.54955335 | 0.544444802 | 8.16E-10    | 135.0909277 |
| CCAR1     | NR_104262    | 73.28443061 | 1.358294203 | 2.32E-07    | 53.95328233 |



|             |              |             |             |             |             |
|-------------|--------------|-------------|-------------|-------------|-------------|
| PAAF1       | NM_001267806 | 114.8159598 | 0.565788294 | 4.46E-15    | 202.9309565 |
| CHST15      | NM_001270764 | 109.1016741 | 4.614625883 | 2.02E-09    | 23.6425827  |
| STOML1      | NM_001256672 | 55.61132799 | 5.388266967 | 0.000463572 | 10.32081898 |
| MED12       | NM_005120    | 46.50965393 | 0.322482399 | 1.33E-06    | 144.2238524 |
| SLC25A3     | NM_002635    | 129.3667968 | 6.391210234 | 1.12E-11    | 20.24136151 |
| KIF18B      | NM_001264573 | 109.8970423 | 2.675082475 | 9.57E-11    | 41.08173983 |
| SDCBP2-AS1  | NR_040049    | 99.5289618  | 5.840976322 | 1.19E-08    | 17.03978176 |
| ST3GAL6     | NM_001271145 | 107.5701449 | 2.992482858 | 1.03E-10    | 35.94678733 |
| EIF4E       | NM_001130678 | 123.3873883 | 1.048720078 | 9.07E-14    | 117.6552169 |
| SLC25A17    | NR_104237    | 81.59073644 | 1.014177879 | 7.95E-09    | 80.45012432 |
| PPP1CA      | NM_001008709 | 134.550837  | 20.73308915 | 1.28E-07    | 6.489666642 |
| FAM92A1     | NM_001283034 | 135.611328  | 5.982443086 | 1.30E-11    | 22.66821866 |
| ZNF124      | NM_001297569 | 117.9382254 | 2.50467607  | 2.28E-12    | 47.0872169  |
| GJC1        | NM_005497    | 69.63191953 | 1.942413116 | 5.72E-07    | 35.84815143 |
| ZSWIM7      | NM_001042698 | 141.3256137 | 3.687891014 | 4.99E-14    | 38.32152663 |
| DNMT3B      | NM_006892    | 137.4079799 | 2.010471942 | 1.33E-14    | 68.34613159 |
| MKL2        | NM_014048    | 106.7747767 | 0.32670728  | 1.27E-12    | 326.820929  |
| FAM156A     | NM_001242492 | 57.40797988 | 0.933749649 | 7.14E-07    | 61.48112609 |
| UBE2D3      | NM_181890    | 86.30373848 | 4.104909642 | 2.98E-07    | 21.02451601 |
| ERICH5      | NM_001170806 | 123.9176338 | 2.044241507 | 1.36E-13    | 60.61790322 |
| TRPM6       | NM_001177310 | 43.65251108 | 0.2337469   | 3.50E-05    | 186.751187  |
| LOC441242   | NR_103527    | 121.060491  | 1.52873802  | 2.24E-13    | 79.1898215  |
| PANX1       | NM_015368    | 116.4066962 | 2.3319622   | 5.64E-12    | 49.91791727 |
| EMC1        | NM_001271428 | 80.79536822 | 2.533205463 | 4.93E-08    | 31.89451838 |
| RBM7        | NM_001286045 | 92.75418513 | 1.510467846 | 1.30E-10    | 61.40758663 |
| P4HA2       | NM_001017974 | 147.0398994 | 0.990292135 | 1.01E-17    | 148.4813361 |
| DNM1L       | NM_012062    | 90.42728775 | 0.774490297 | 4.23E-11    | 116.7571603 |
| CD164       | NM_001142403 | 121.3256137 | 5.428752086 | 8.76E-11    | 22.34871141 |
| LINC00959   | NR_034125    | 125.9794085 | 1.668094559 | 1.62E-13    | 75.52294188 |
| PRKRA       | NM_001139517 | 75.61132799 | 1.573301945 | 2.94E-08    | 48.05900623 |
| TRAF5       | NM_004619    | 31.95881691 | 1.038357327 | 0.000938296 | 30.77824567 |
| MESDC2      | NM_015154    | 149.6319195 | 3.365365793 | 2.75E-16    | 44.46230477 |
| HNRNPH1     | NM_001257293 | 224.713002  | 11.96543347 | 4.69E-19    | 18.78018064 |
| IMP4        | NM_033416    | 77.20206442 | 5.088188534 | 7.47E-07    | 15.1727995  |
| C12orf45    | NM_152318    | 129.3667968 | 3.474254396 | 9.83E-14    | 37.2358446  |
| INTS1       | NM_001080453 | 75.34620525 | 1.906431307 | 1.34E-07    | 39.52211914 |
| MIER1       | NM_001146110 | 78.2033481  | 3.303977045 | 2.31E-07    | 23.66945867 |
| MCFD2       | NM_001171507 | 96.14157347 | 6.382234363 | 3.25E-08    | 15.06393655 |
| UBR4        | NM_020765    | 158.2033481 | 1.351972019 | 5.36E-16    | 117.0167325 |
| G2E3        | NM_017769    | 93.01930787 | 1.292296134 | 8.77E-10    | 71.97987012 |
| ZNF596      | NM_001287256 | 97.93822536 | 4.237131776 | 2.38E-09    | 23.11427412 |
| SLC44A3     | NM_001301079 | 61.59073644 | 1.795846388 | 5.28E-06    | 34.29621646 |
| RAD51       | NM_002875    | 86.50965393 | 1.59608466  | 5.12E-09    | 54.20116871 |
| ZNF227      | NM_001289167 | 67.03989941 | 0.162488082 | 1.14E-10    | 412.5834863 |
| POLR3E      | NM_001258035 | 100.7953682 | 2.38793836  | 2.52E-10    | 42.21020522 |
| OSGEPL1-AS1 | NR_102429    | 124.1827566 | 16.53822784 | 1.18E-07    | 7.508830918 |
| EPAS1       | NM_001430    | 115.0810825 | 1.763106159 | 1.88E-11    | 65.27178293 |
| TYW1        | NM_018264    | 140         | 0.718173021 | 1.69E-15    | 194.9390967 |
| MFSD5       | NM_032889    | 137.9382254 | 18.25375681 | 6.74E-08    | 7.556703356 |
| ANAPC16     | NM_001242547 | 244.713002  | 3.360694886 | 6.10E-27    | 72.8161914  |
| PLEKHB2     | NR_049789    | 78.46847084 | 3.946715682 | 1.49E-06    | 19.88196697 |
| INPP5K      | NM_130766    | 69.89704227 | 2.510581409 | 4.92E-07    | 27.8409782  |
| TECPR2      | NM_014844    | 109.3667968 | 0.776022583 | 2.19E-12    | 140.9324925 |
| TATDN3      | NM_001146171 | 172.2239396 | 2.449983558 | 1.42E-18    | 70.29595733 |
| FAM185A     | NR_026879    | 55.34620525 | 0.109585357 | 4.19E-08    | 505.0510995 |
| MSH6        | NM_000179    | 91.69369417 | 4.738149722 | 3.08E-08    | 19.35221543 |
| S100PBP     | NM_001256121 | 35.61132799 | 3.233955087 | 0.004177181 | 11.01169529 |
| UNC119      | NM_005148    | 115.0810825 | 7.800383636 | 1.71E-09    | 14.75325931 |
| SNHG4       | NR_036536    | 118.2033481 | 24.19282157 | 1.01E-05    | 4.885885168 |
| CCM2        | NM_031443    | 37.14285714 | 0.992899762 | 0.000248575 | 37.40846617 |
| VAT1        | NM_006373    | 57.7323099  | 8.978531283 | 0.001080058 | 6.4300394   |
| TMBIM4      | NM_001282606 | 153.8146761 | 4.666244254 | 8.60E-15    | 32.96327147 |
| CREM        | NM_181571    | 44.4478793  | 0.722585544 | 2.33E-05    | 61.51227307 |
| DERA        | NM_001300779 | 149.6319195 | 0.097855796 | 1.41E-22    | 1529.106351 |

|          |              |             |             |             |             |
|----------|--------------|-------------|-------------|-------------|-------------|
| BTBD8    | NM_183242    | 135.611328  | 0.436752052 | 5.72E-18    | 310.4995787 |
| ZNF77    | NM_021217    | 104.713002  | 1.552842556 | 2.28E-12    | 67.43310947 |
| CSNK1G3  | NM_001270574 | 66.77477667 | 0.599445337 | 1.01E-07    | 111.3942716 |
| LIFR-AS1 | NR_103553    | 93.01930787 | 1.12002433  | 4.48E-10    | 83.05114934 |
| GRAMD2   | NM_001012642 | 94.81595977 | 1.363149909 | 3.21E-10    | 69.55651694 |
| RAD52    | NM_001297422 | 159.2638391 | 2.204057579 | 7.28E-18    | 72.25938223 |
| CD44     | NM_001001391 | 63.91763382 | 5.708854664 | 5.23E-05    | 11.19622719 |
| VPS11    | NM_021729    | 80.26512274 | 1.934625953 | 3.87E-09    | 41.4887036  |
| CBLL1    | NM_024814    | 63.91763382 | 4.741635868 | 2.33E-05    | 13.48008063 |
| TBCA     | NM_001297738 | 111.6936942 | 1.629701213 | 3.06E-11    | 68.5363018  |
| GLMN     | NM_053274    | 235.611328  | 1.075533663 | 1.55E-28    | 219.064578  |
| TAB1     | NM_153497    | 95.87645073 | 0.075772029 | 1.32E-16    | 1265.327752 |
| IQUB     | NM_001282855 | 89.63191953 | 0.180459011 | 1.69E-12    | 496.6885225 |
| POLD1    | NR_046402    | 75.08108251 | 1.130289317 | 5.04E-08    | 66.42642848 |
| BTD      | NM_001281723 | 47.83526763 | 1.665451852 | 0.000117106 | 28.72209579 |
| UBAP1    | NM_001171202 | 103.1222656 | 0.144430518 | 2.49E-15    | 713.9922137 |
| NCOA4    | NM_001145261 | 62.85714286 | 4.811992143 | 3.09E-05    | 13.06260297 |
| TRIAP1   | NM_016399    | 76.14157347 | 6.494362941 | 7.22E-06    | 11.72425597 |
| ABCB9    | NM_001243013 | 84.71300204 | 2.268243062 | 9.94E-09    | 37.34740931 |
| BMS1P5   | NR_003611    | 121.060491  | 2.787325667 | 6.30E-12    | 43.43248885 |
| AIG1     | NM_001286589 | 51.42857143 | 0.359631232 | 3.78E-06    | 143.0036296 |
| FAN1     | NM_001146095 | 120.5302455 | 2.11976204  | 9.55E-14    | 56.86027167 |
| RNF207   | NM_207396    | 97.93822536 | 6.59057391  | 3.85E-08    | 14.86034854 |
| EPOR     | NR_033663    | 111.9588169 | 24.20138684 | 2.19E-05    | 4.626132281 |
| TIGD6    | NM_030953    | 78.2033481  | 13.84390825 | 0.000214807 | 5.648935741 |
| GTF3C6   | NM_138408    | 70.42728775 | 2.609401282 | 3.31E-07    | 26.98982645 |
| BTG2     | NM_006763    | 221.5907364 | 15.67352451 | 4.50E-17    | 14.13790091 |
| DESI2    | NR_123735    | 184.4478793 | 0.484960351 | 2.39E-24    | 380.3359982 |
| RAD1     | NR_026591    | 75.61132799 | 1.175961615 | 2.12E-09    | 64.29744564 |
| MBOAT1   | NM_001080480 | 58.46847084 | 0.836546328 | 1.56E-06    | 69.89268721 |
| MEF2A    | NM_005587    | 103.3873883 | 1.2874662   | 4.31E-10    | 80.30299232 |
| AGTPBP1  | NM_001286717 | 100.5302455 | 0.208068421 | 1.68E-12    | 483.159553  |
| PSMB5    | NM_001144932 | 42.91635014 | 5.240733275 | 0.001730153 | 8.188997204 |
| PSMC4    | NM_153001    | 64.4478793  | 5.360271983 | 3.63E-05    | 12.02324798 |
| PEA15    | NM_001297577 | 146.7747767 | 7.712275349 | 4.38E-13    | 19.03131956 |
| RPL5     | NM_000969    | 161.5907364 | 8.414643818 | 4.01E-14    | 19.20351472 |
| PPP6R2   | NM_014678    | 126.7747767 | 2.070461747 | 1.81E-12    | 61.23019507 |
| ALDH5A1  | NM_170740    | 87.03989941 | 1.107041461 | 2.90E-09    | 78.62388399 |
| ZNF211   | NM_001265599 | 58.73359358 | 0.75955621  | 7.40E-08    | 77.32619757 |
| PPA1     | NM_021129    | 155.8764507 | 2.322948965 | 1.36E-17    | 67.10283052 |
| TTC4     | NM_001291333 | 171.6936942 | 0.849089191 | 1.03E-22    | 202.2092567 |
| IL6R     | NM_001206866 | 33.28443061 | 1.45896303  | 0.003075973 | 22.81375876 |
| ARAP3    | NM_022481    | 41.3256137  | 2.367503366 | 0.000908741 | 17.45535583 |
| YTHDC1   | NM_133370    | 123.3873883 | 3.770391878 | 2.08E-11    | 32.72534854 |
| UCK1     | NM_001261450 | 50.42728775 | 5.853411279 | 0.000802118 | 8.615025555 |
| EZH2     | NM_152998    | 46.24453119 | 0.369035497 | 1.06E-05    | 125.311878  |
| ANXA7    | NM_004034    | 141.3256137 | 1.582028091 | 1.07E-15    | 89.33192433 |
| FAM49B   | NM_001256763 | 144.713002  | 1.021279951 | 1.70E-15    | 141.6976822 |
| APLP1    | NM_001024807 | 72.22393965 | 5.106008149 | 1.73E-06    | 14.14489314 |
| AMD1     | NM_001287216 | 90.42728775 | 5.19572994  | 2.89E-08    | 17.40415472 |
| GNAS     | NM_001077489 | 68.83655131 | 4.467776329 | 6.09E-06    | 15.40734053 |
| LBX2     | NM_001009812 | 135.0810825 | 12.95469191 | 9.11E-10    | 10.42719375 |
| C17orf80 | NR_110105    | 54.07979883 | 1.876982913 | 1.03E-05    | 28.81208905 |
| KIF9     | NM_182902    | 56.14157347 | 0.847233269 | 7.35E-07    | 66.26459975 |
| TCP1     | NM_030752    | 129.3667968 | 6.587441875 | 3.59E-11    | 19.6383967  |
| MAPKAP1  | NM_001006620 | 138.4684708 | 0.739891017 | 4.74E-15    | 187.1471171 |
| CTNS     | NM_004937    | 76.40669621 | 7.82160731  | 8.33E-06    | 9.768669428 |
| HBEGF    | NM_001945    | 200.7953682 | 4.482285348 | 3.15E-21    | 44.79754247 |
| SCNM1    | NM_024041    | 66.77477667 | 6.216784493 | 4.36E-05    | 10.74104736 |
| WDR31    | NM_001012361 | 138.7335936 | 1.518039838 | 8.75E-17    | 91.38995572 |
| NMRK1    | NM_017881    | 149.3667968 | 0.520640719 | 1.19E-20    | 286.8903472 |
| PRKG2    | NM_001282480 | 49.36679679 | 0.185054018 | 1.08E-06    | 266.7696557 |
| PA2G4    | NM_006191    | 83.1222656  | 8.136811955 | 3.82E-06    | 10.21558149 |
| TMEM14B  | NM_030969    | 183.3873883 | 3.122256915 | 2.18E-21    | 58.73552155 |

|           |              |             |             |             |             |
|-----------|--------------|-------------|-------------|-------------|-------------|
| STAG3L4   | NR_040586    | 160.7953682 | 2.235775328 | 4.84E-18    | 71.91928733 |
| PIK3R1    | NM_181523    | 184.1827566 | 1.910848457 | 5.06E-19    | 96.38794532 |
| ELMOD1    | NM_001130037 | 32.48906239 | 0.204529051 | 0.000412909 | 158.8481552 |
| APOBEC3F  | NM_145298    | 61.3256137  | 4.709464388 | 3.98E-05    | 13.02178096 |
| FOXJ3     | NM_001198851 | 50.16216501 | 0.899871313 | 8.59E-06    | 55.74370946 |
| AGPAT5    | NM_018361    | 41.85585918 | 3.189851879 | 0.000637752 | 13.12156826 |
| EXOSC1    | NM_016046    | 58.99871632 | 1.20962826  | 2.87E-07    | 48.77425429 |
| LHX2      | NM_004789    | 57.93822536 | 0.592393268 | 9.01E-07    | 97.80365254 |
| H3F3AP4   | NR_002315    | 142.8571429 | 4.964643429 | 1.03E-13    | 28.77490497 |
| ADIPOR2   | NM_024551    | 65.97940845 | 1.023522071 | 1.73E-07    | 64.46310275 |
| MON1A     | NM_001142501 | 108.8365513 | 4.326513323 | 2.65E-10    | 25.15571852 |
| SPECC1L   | NM_001254732 | 194.550837  | 1.384468104 | 5.99E-20    | 140.5238853 |
| FNTA      | NR_033698    | 138.2033481 | 2.26821033  | 3.44E-15    | 60.93056992 |
| CSNK1A1   | NM_001892    | 103.3873883 | 2.418477616 | 2.57E-10    | 42.748954   |
| MAOA      | NM_001270458 | 27.03989941 | 0.517220351 | 0.004124413 | 52.27926424 |
| TEX2      | NM_018469    | 89.63191953 | 3.210683192 | 2.21E-08    | 27.91677477 |
| AFG3L1P   | NR_003227    | 175.611328  | 1.656006289 | 2.09E-21    | 106.0450852 |
| ATG4D     | NM_032885    | 135.0810825 | 8.279719791 | 9.58E-12    | 16.31469252 |
| EHHADH    | NM_001166415 | 164.4478793 | 0.194445199 | 1.94E-25    | 845.728669  |
| TMEM184B  | NM_012264    | 121.060491  | 3.125390923 | 5.01E-12    | 38.57345116 |
| SMAD6     | NR_027654    | 112.2239396 | 1.532951601 | 2.41E-11    | 73.20775134 |
| DTL       | NM_016448    | 67.30502215 | 0.26292572  | 3.13E-09    | 255.9849308 |
| POLR3F    | NM_001282526 | 58.99871632 | 1.643233444 | 1.78E-06    | 35.90403818 |
| GMNN      | NM_001251990 | 92.48906239 | 3.587354544 | 3.35E-09    | 25.78196865 |
| SURF4     | NM_033161    | 107.0398994 | 7.046807646 | 5.02E-09    | 15.18984266 |
| MGST3     | NM_004528    | 64.18275656 | 3.485407862 | 2.40E-05    | 18.4147047  |
| ATP5J     | NM_001003697 | 61.06049096 | 7.929735887 | 0.00020276  | 7.700192267 |
| NOP2      | NM_001258309 | 169.8970423 | 4.463908877 | 1.11E-17    | 38.06015018 |
| NDRG1     | NM_001135242 | 214.875167  | 0.409581859 | 5.14E-29    | 524.620811  |
| CCDC93    | NM_019044    | 190.162165  | 0.937411348 | 3.19E-21    | 202.8588254 |
| TTC14     | NM_133462    | 109.1016741 | 2.225433227 | 1.11E-12    | 49.02491468 |
| UBE2H     | NM_003344    | 102.1209819 | 2.391434349 | 6.57E-10    | 42.7028164  |
| TMEM120B  | NM_001080825 | 120.7953682 | 5.792731032 | 1.53E-10    | 20.85292197 |
| TMEM150A  | NM_001031738 | 107.0398994 | 16.91995928 | 2.29E-06    | 6.326250414 |
| TMED3     | NM_007364    | 133.0193079 | 5.249465884 | 5.81E-13    | 25.33958898 |
| MARVELD3  | NM_052858    | 134.8159598 | 4.721325074 | 1.86E-13    | 28.55468701 |
| MMP28     | NM_001032278 | 76.14157347 | 2.176406509 | 2.07E-08    | 34.98499621 |
| LAMB1     | NM_002291    | 63.65251108 | 2.532090505 | 6.58E-06    | 25.13832383 |
| FKBP7     | NM_181342    | 109.3667968 | 1.661360208 | 2.66E-13    | 65.82967153 |
| MBIP      | NM_016586    | 71.69369417 | 0.602528869 | 7.31E-09    | 118.9879819 |
| CASP8     | NM_001080125 | 41.59073644 | 0.564337351 | 1.30E-05    | 73.69835859 |
| DCAF5     | NM_001284206 | 72.22393965 | 1.519245654 | 7.40E-07    | 47.53934261 |
| CHORDC1   | NM_012124    | 95.87645073 | 2.782465716 | 2.48E-10    | 34.45737001 |
| ADAM22    | NM_021722    | 218.2033481 | 0.363211385 | 7.40E-26    | 600.7613114 |
| PPP1R3B   | NM_001201329 | 49.10167405 | 5.510735343 | 0.000645787 | 8.910185482 |
| CAPZA2    | NM_006136    | 109.3667968 | 1.202500741 | 1.26E-11    | 90.94946312 |
| ASB13     | NM_024701    | 123.6525111 | 1.720966518 | 5.54E-14    | 71.85061987 |
| ASAP1     | NM_018482    | 52.22393965 | 1.015084751 | 1.16E-05    | 51.44786145 |
| EWSR1     | NM_001163287 | 63.65251108 | 2.652775559 | 2.49E-06    | 23.99468393 |
| FBXL13    | NM_001111038 | 78.99871632 | 0.526826262 | 5.87E-09    | 149.9521228 |
| MTL5      | NM_001039656 | 66.24453119 | 3.306489829 | 6.41E-06    | 20.03469983 |
| CDK5RAP2  | NR_073556    | 71.95881691 | 0.735029378 | 5.36E-08    | 97.89923918 |
| PPHLN1    | NM_201438    | 72.48906239 | 0.855844946 | 2.01E-08    | 84.69882627 |
| SERPINB8  | NM_001276490 | 89.89704227 | 4.376596657 | 3.95E-08    | 20.54039916 |
| HNRNPDL   | NM_001207000 | 107.0398994 | 21.21247899 | 2.35E-05    | 5.046081576 |
| TXNDC5    | NM_030810    | 37.14285714 | 3.285532015 | 0.002029003 | 11.30497495 |
| POT1      | NR_003102    | 27.30502215 | 0.660624257 | 0.002224703 | 41.33215194 |
| THOC5     | NM_003678    | 118.4684708 | 1.510543209 | 1.14E-12    | 78.42772728 |
| DSTN      | NM_006870    | 93.01930787 | 2.414057324 | 1.19E-09    | 38.53235255 |
| CCNT2-AS1 | NR_036549    | 68.83655131 | 0.854596128 | 2.53E-08    | 80.54863471 |
| ANKS3     | NR_040252    | 81.59073644 | 2.527834003 | 2.55E-08    | 32.27693604 |
| BRF2      | NM_018310    | 122.6512274 | 7.745109745 | 1.62E-10    | 15.83595732 |
| SEPW1     | NM_003009    | 130.6924105 | 12.92539122 | 2.20E-09    | 10.11129244 |
| MROH8     | NM_152503    | 91.69369417 | 0.52440602  | 2.29E-11    | 174.8524818 |

|              |              |             |             |             |             |
|--------------|--------------|-------------|-------------|-------------|-------------|
| TAZ          | NM_000116    | 55.61132799 | 2.856347441 | 5.83E-05    | 19.46938499 |
| SYPL1        | NM_182715    | 67.03989941 | 0.418139119 | 1.85E-08    | 160.3291736 |
| WSB1         | NM_134265    | 240.7953682 | 4.71452428  | 5.32E-25    | 51.07522073 |
| ILDRI        | NM_175924    | 145.7142857 | 1.447572827 | 7.35E-17    | 100.6611087 |
| ARHGFE16     | NM_014448    | 43.1222656  | 0.228473057 | 2.20E-06    | 188.7411412 |
| YTHDF3       | NM_001277817 | 47.57014489 | 1.763413078 | 0.000119954 | 26.9761779  |
| TRIM52-AS1   | NR_102762    | 92.48906239 | 7.940031068 | 6.12E-07    | 11.64845094 |
| RAB3IP       | NM_175624    | 92.22393965 | 0.713122694 | 6.42E-11    | 129.3240847 |
| BICD2        | NM_015250    | 53.54955335 | 1.03826419  | 2.03E-06    | 51.57603805 |
| ABLIM3       | NM_001301027 | 32.75418513 | 0.970269022 | 0.001212451 | 33.75783869 |
| TNFRSF10B    | NR_027140    | 124.713002  | 2.96250455  | 8.81E-13    | 42.09715122 |
| SEC61A2      | NM_001142627 | 69.89704227 | 1.714070724 | 6.77E-07    | 40.77838871 |
| RGL3         | NM_001161616 | 86.24453119 | 6.686737432 | 1.09E-06    | 12.89784922 |
| KAT7         | NM_001199157 | 119.5289618 | 3.132425481 | 2.85E-12    | 38.15859708 |
| DCP2         | NM_001242377 | 157.9382254 | 1.622739671 | 1.67E-17    | 97.32813472 |
| ARMC7        | NM_024585    | 118.2033481 | 13.57128273 | 3.61E-08    | 8.709813985 |
| SLC39A6      | NM_001099406 | 129.8970423 | 2.072312598 | 4.16E-14    | 62.682166   |
| GATC         | NM_176818    | 113.0193079 | 6.835200439 | 7.71E-10    | 16.534893   |
| ASAH1        | NM_004315    | 83.91763382 | 7.249256545 | 2.40E-06    | 11.57603311 |
| MYO19        | NM_001163735 | 121.5907364 | 6.327067174 | 3.51E-10    | 19.21755105 |
| TMBIM6       | NM_001098576 | 64.18275656 | 0.056128365 | 2.31E-11    | 1143.499481 |
| FOXRED1      | NR_037647    | 52.75418513 | 3.033574873 | 0.000119534 | 17.39010486 |
| USP15        | NM_001252079 | 92.75418513 | 0.623215343 | 3.40E-11    | 148.8316777 |
| PTPRF        | NM_130440    | 71.69369417 | 2.24541707  | 8.94E-07    | 31.9288987  |
| VPS72        | NM_001271087 | 106.7747767 | 4.664396103 | 1.67E-09    | 22.89144711 |
| ZNF271       | NR_024566    | 104.1827566 | 1.350906849 | 2.82E-12    | 77.12060724 |
| NFIL3        | NM_001290000 | 63.91763382 | 4.730718911 | 2.02E-05    | 13.51118826 |
| GFOD2        | NM_030819    | 95.34620525 | 0.524639158 | 1.26E-12    | 181.7367305 |
| ZNF526       | NM_133444    | 121.060491  | 9.245883357 | 1.62E-09    | 13.09344779 |
| CST3         | NM_000099    | 168.8365513 | 10.20103664 | 4.31E-14    | 16.55092097 |
| SPATA24      | NM_194296    | 38.2033481  | 4.041608099 | 0.004760195 | 9.452511764 |
| NXPE3        | NM_001134456 | 61.59073644 | 1.61890687  | 3.39E-06    | 38.04464456 |
| PRMT5        | NM_001039619 | 80.26512274 | 10.99440185 | 3.55E-05    | 7.300544754 |
| YEATS4       | NM_006530    | 133.2844306 | 0.442394743 | 2.11E-18    | 301.2794177 |
| UBE2J1       | NM_016021    | 132.2239396 | 0.647436579 | 1.80E-17    | 204.2268601 |
| YKT6         | NM_006555    | 158.9987163 | 0.657594452 | 1.55E-22    | 241.788409  |
| FABP5        | NM_001444    | 198.9987163 | 19.76433384 | 1.08E-13    | 10.06857696 |
| ZNF143       | NM_001282656 | 137.9382254 | 1.61764266  | 2.15E-14    | 85.27113481 |
| TUG1         | NR_002323    | 70.16216501 | 5.34825217  | 8.30E-06    | 13.11870921 |
| FAM210A      | NM_152352    | 84.4478793  | 0.624270407 | 1.13E-10    | 135.2745194 |
| ADAM10       | NM_001110    | 56.14157347 | 0.424143644 | 1.13E-06    | 132.3645287 |
| TRAPPC12     | NM_016030    | 207.3050222 | 0.284665557 | 2.95E-29    | 728.2406228 |
| GATAD2A      | NM_017660    | 46.50965393 | 1.635436799 | 0.000346008 | 28.43867398 |
| RNF128       | NM_194463    | 88.83655131 | 0.893185228 | 1.63E-10    | 99.46039024 |
| GBF1         | NM_001199378 | 197.9382254 | 1.931392875 | 7.14E-20    | 102.4847031 |
| MLF2         | NM_005439    | 75.08108251 | 4.180502543 | 4.71E-07    | 17.95982223 |
| RPA1         | NM_002945    | 108.8365513 | 1.112229495 | 1.77E-11    | 97.85440126 |
| EIF3L        | NM_001242923 | 116.9369417 | 3.025425954 | 5.14E-12    | 38.65139767 |
| SGCE         | NM_003919    | 37.40797988 | 0.719396499 | 0.000205022 | 51.99911307 |
| KIAA0040     | NM_001162893 | 72.48906239 | 3.80267633  | 4.59E-06    | 19.06264328 |
| TMCO6        | NM_018502    | 107.3050222 | 7.67629337  | 8.01E-09    | 13.97875472 |
| TRIM3        | NM_001248006 | 69.63191953 | 3.443675164 | 6.16E-06    | 20.22023455 |
| DHFRL1       | NM_176815    | 70.16216501 | 7.689328006 | 1.99E-05    | 9.124615956 |
| GAR1         | NM_032993    | 36.14157347 | 0.32576723  | 6.63E-05    | 110.9429376 |
| C3orf18      | NM_001171740 | 75.34620525 | 3.99339055  | 4.04E-07    | 18.86772764 |
| LAS1L        | NM_031206    | 54.81595977 | 1.253224849 | 8.79E-06    | 43.73992408 |
| ULK2         | NM_001142610 | 124.4478793 | 0.530708286 | 1.51E-15    | 234.4939443 |
| SDHC         | NM_001035513 | 73.54955335 | 1.487120716 | 1.66E-07    | 49.45768864 |
| LOC100507634 | NR_038320    | 147.3050222 | 11.52503609 | 6.20E-11    | 12.7813068  |
| BTF3         | NM_001207    | 113.0193079 | 1.524533151 | 1.15E-14    | 74.13371614 |
| FAM174A      | NM_198507    | 55.61132799 | 0.965799498 | 1.78E-06    | 57.58061391 |
| HPS1         | NM_182639    | 184.713002  | 3.706560368 | 3.56E-19    | 49.83407356 |
| MOB4         | NM_001204094 | 55.08108251 | 0.873997676 | 1.00E-06    | 63.02200111 |
| CCDC90B      | NM_001286120 | 112.7541851 | 1.519277407 | 1.01E-12    | 74.21566637 |

|              |              |             |             |             |             |
|--------------|--------------|-------------|-------------|-------------|-------------|
| NDUFB3       | NM_001257102 | 172.4890624 | 2.010684455 | 8.06E-21    | 85.78624159 |
| SNX7         | NM_152238    | 118.4684708 | 0.447937012 | 1.12E-14    | 264.4757357 |
| NUDT3        | NM_006703    | 114.8159598 | 1.570060487 | 2.04E-11    | 73.12836715 |
| TMEM44       | NM_138399    | 51.69369417 | 2.332218851 | 7.22E-05    | 22.16502716 |
| DYNC1H1      | NM_001376    | 178.2033481 | 1.248101499 | 3.79E-19    | 142.7795321 |
| SMN1         | NM_022874    | 129.9562496 | 14.81026837 | 1.96E-08    | 8.77473968  |
| SCAMP1       | NM_001290229 | 111.9588169 | 0.913889799 | 1.05E-12    | 122.5080059 |
| AGO3         | NM_177422    | 215.8764507 | 0.424313814 | 5.96E-28    | 508.7660205 |
| RRAGC        | NM_001271851 | 64.18275656 | 0.136915543 | 1.77E-10    | 468.7762634 |
| ARHGAP8      | NM_181335    | 54.81595977 | 1.633361293 | 4.66E-05    | 33.56021721 |
| IQCE         | NM_152558    | 60.53024548 | 1.48679242  | 7.33E-06    | 40.71196805 |
| LOC100505666 | NR_040772    | 131.9588169 | 6.117013149 | 5.44E-12    | 21.57242656 |
| CEP162       | NM_001286206 | 21.59073644 | 0.038775023 | 0.002065881 | 556.8207323 |
| DHRS7        | NM_016029    | 180.5302455 | 3.709933622 | 4.26E-19    | 48.66131415 |
| NUPL1        | NM_014089    | 109.6319195 | 2.515488769 | 3.49E-11    | 43.58275055 |
| RPN2         | NM_002951    | 72.48906239 | 1.504893843 | 4.68E-07    | 48.1688876  |
| PALD1        | NM_014431    | 114.8159598 | 2.845097349 | 3.74E-11    | 40.35572273 |
| PTPMT1       | NM_001143984 | 120.7953682 | 4.527346659 | 3.86E-12    | 26.68127213 |
| RRM2B        | NM_015713    | 92.48906239 | 0.540275091 | 2.99E-11    | 171.188833  |
| UTP18        | NM_016001    | 145.5083703 | 2.729833089 | 1.64E-15    | 53.30302824 |
| MCPH1        | NM_001172574 | 89.63191953 | 0.546006449 | 7.15E-12    | 164.1590857 |
| RAD54L       | NM_003579    | 71.69369417 | 4.664627976 | 4.74E-06    | 15.36964888 |
| SLC25A5      | NM_001152    | 124.1827566 | 10.23672213 | 2.39E-09    | 12.13110555 |
| ECI2         | NR_028588    | 100.7953682 | 0.698471223 | 4.50E-13    | 144.3085484 |
| GPR107       | NM_001136557 | 96.14157347 | 1.870341423 | 1.40E-09    | 51.40322097 |
| ARF5         | NM_001662    | 121.5907364 | 10.7214022  | 4.58E-09    | 11.34093603 |
| TIPRL        | NM_001031800 | 49.63191953 | 4.380555632 | 0.000519271 | 11.33005119 |
| CCDC134      | NM_024821    | 169.8970423 | 3.801821518 | 3.46E-17    | 44.68832676 |
| FBXL20       | NM_032875    | 91.95881691 | 0.426928943 | 7.22E-11    | 215.3960712 |
| CUL3         | NM_001257197 | 63.1222656  | 0.669601139 | 2.82E-07    | 94.26845613 |
| MLKL         | NM_152649    | 98.73359358 | 1.315331278 | 2.42E-11    | 75.06367043 |
| FPGS         | NR_110170    | 155.0810825 | 5.611106443 | 1.72E-14    | 27.63823571 |
| ZDHHC20      | NM_153251    | 126.7747767 | 0.023217337 | 2.73E-22    | 5460.349686 |
| CHD2         | NM_001042572 | 152.7541851 | 4.39848184  | 4.05E-14    | 34.72884297 |
| PPL          | NM_002705    | 71.95881691 | 2.761705961 | 7.22E-07    | 26.05592989 |
| LYSMD4       | NM_001284417 | 89.63191953 | 2.653291102 | 2.57E-09    | 33.78141187 |
| GIGYF2       | NM_001103148 | 177.6731026 | 1.056495943 | 2.66E-18    | 168.1720634 |
| POLR2K       | NM_005034    | 108.1003904 | 3.818994279 | 5.17E-11    | 28.30598384 |
| SNX15        | NM_013306    | 92.75418513 | 2.302537502 | 1.51E-09    | 40.28346338 |
| ISL2         | NM_145805    | 114.8159598 | 4.541253794 | 2.94E-11    | 25.28287671 |
| SZT2         | NM_015284    | 135.3462052 | 3.400339827 | 2.35E-13    | 39.80372907 |
| RPS17        | NR_111943    | 139.2638391 | 30.98798151 | 1.92E-06    | 4.494124246 |
| ARSA         | NM_001085428 | 66.24453119 | 6.239255592 | 6.59E-05    | 10.61737738 |
| LOC100288798 | NR_125379    | 121.8558592 | 0.679171393 | 1.49E-13    | 179.4184213 |
| C16orf46     | NM_152337    | 149.8970423 | 1.397591642 | 3.38E-18    | 107.2538199 |
| NCOA6        | NM_014071    | 37.14285714 | 0.68978947  | 0.000249985 | 53.84665724 |
| CNOT8        | NM_001301083 | 129.8970423 | 3.445578755 | 4.01E-13    | 37.69962944 |
| LINC01431    | NR_109884    | 98.99871632 | 23.10193621 | 0.000359496 | 4.285299528 |
| TSPYL1       | NM_003309    | 61.06049096 | 11.73369971 | 0.001518136 | 5.203856625 |
| FAM195B      | NM_207368    | 49.63191953 | 7.300918104 | 0.002281641 | 6.798038113 |
| N4BP3        | NM_015111    | 111.9588169 | 4.940580317 | 3.30E-10    | 22.66106605 |
| ST6GALNAC2   | NM_006456    | 124.713002  | 13.99234102 | 2.54E-08    | 8.912947582 |
| SF3A2        | NM_007165    | 95.87645073 | 5.805678283 | 1.84E-08    | 16.51425485 |
| GGCT         | NM_001199816 | 110.4272878 | 3.635682898 | 2.35E-11    | 30.37319008 |
| IDUA         | NM_000203    | 138.4684708 | 3.70392605  | 3.83E-14    | 37.38424282 |
| GPR155       | NM_001033045 | 64.18275656 | 0.422421202 | 3.79E-08    | 151.9401874 |
| MAPK4        | NM_002747    | 32.22393965 | 0.705651237 | 0.001225315 | 45.66553274 |
| ING2         | NM_001564    | 40.79536822 | 3.671954964 | 0.00224436  | 11.10998599 |
| ARHGAP5      | NM_001173    | 40.26512274 | 0.905256558 | 0.000117335 | 44.47923893 |
| TUT1         | NM_022830    | 117.9382254 | 5.902694415 | 2.50E-10    | 19.98040506 |
| RPL22L1      | NM_001099645 | 164.4478793 | 27.0802318  | 7.45E-09    | 6.072617122 |
| UNK          | NM_001080419 | 117.9382254 | 2.533518387 | 3.73E-12    | 46.5511622  |
| RRM2         | NM_001165931 | 115.611328  | 9.899481667 | 1.11E-08    | 11.67852337 |
| NELFCD       | NM_198976    | 63.1222656  | 4.872934196 | 1.85E-05    | 12.95364621 |

|                |              |             |             |             |             |
|----------------|--------------|-------------|-------------|-------------|-------------|
| TMEM135        | NM_001168724 | 127.5701449 | 0.230663995 | 1.96E-15    | 553.0561662 |
| COMMD8         | NM_017845    | 141.3256137 | 1.521244133 | 2.55E-17    | 92.90133691 |
| PTPRS          | NM_130855    | 37.14285714 | 2.438310531 | 0.002522323 | 15.23302987 |
| TWF2           | NM_007284    | 151.9588169 | 6.34030022  | 5.10E-14    | 23.96713273 |
| DCAF10         | NM_001286810 | 184.4478793 | 0.712953083 | 2.25E-22    | 258.7097014 |
| EPHA2          | NM_004431    | 155.8764507 | 7.727984521 | 1.18E-13    | 20.17038858 |
| TNS4           | NM_032865    | 86.50965393 | 10.71571507 | 6.58E-06    | 8.073157354 |
| ERCC6L         | NM_017669    | 62.85714286 | 0.201394767 | 1.63E-09    | 312.1091164 |
| LINC01420      | NR_015367    | 74.81595977 | 0.318161586 | 1.60E-09    | 235.150826  |
| EDC3           | NM_001142444 | 47.57014489 | 1.539218907 | 0.000138835 | 30.90537978 |
| PRKCI          | NM_002740    | 149.6319195 | 0.963408311 | 2.94E-16    | 155.3151637 |
| ARRDC1         | NM_152285    | 160.7953682 | 17.35707907 | 9.52E-11    | 9.263964725 |
| BSG            | NM_198589    | 98.99871632 | 6.047086916 | 8.16E-09    | 16.37130699 |
| ATF7           | NR_073163    | 102.3861047 | 1.196154885 | 2.79E-10    | 85.59602603 |
| PRCC           | NM_005973    | 49.89704227 | 2.306019411 | 0.000119038 | 21.63773732 |
| CDC25A         | NM_201567    | 58.46847084 | 2.867586191 | 1.59E-05    | 20.389438   |
| TMEM237        | NM_001044385 | 49.89704227 | 3.103838858 | 0.000115037 | 16.07591262 |
| KIAA1841       | NM_001129993 | 90.69241049 | 0.066623024 | 3.54E-15    | 1361.277301 |
| C18orf25       | NM_001008239 | 92.22393965 | 0.876976988 | 1.25E-10    | 105.1611854 |
| ALDH1L2        | NR_027752    | 40.79536822 | 1.047510885 | 0.000112436 | 38.94505423 |
| ADAM17         | NM_003183    | 89.89704227 | 1.958684899 | 9.09E-09    | 45.89663316 |
| IKZF5          | NR_073479    | 121.060491  | 0.75833499  | 2.46E-16    | 159.639859  |
| HYAL3          | NM_001200031 | 129.3667968 | 17.30639403 | 4.20E-08    | 7.475086756 |
| ZNF664-FAM101A | NM_001204299 | 60.53024548 | 0.302221552 | 7.99E-07    | 200.2843445 |
| SORL1          | NM_003105    | 46.50965393 | 0.911718084 | 3.80E-05    | 51.01319667 |
| FUT4           | NM_002033    | 150.4272878 | 13.10060878 | 1.51E-11    | 11.48246545 |
| CNPY3          | NM_006586    | 72.22393965 | 7.41176018  | 1.26E-05    | 9.744505744 |
| TTC31          | NM_022492    | 61.06049096 | 2.056271719 | 1.23E-06    | 29.69475795 |
| C19orf48       | NM_001290152 | 90.69241049 | 19.61180062 | 0.000117594 | 4.62437959  |
| GTF2H2C        | NM_001098728 | 170.4272878 | 2.307874859 | 3.11E-19    | 73.84598306 |
| SP110          | NM_004510    | 38.73359358 | 0.880488917 | 7.62E-05    | 43.9910064  |
| PYGL           | NM_002863    | 232.2239396 | 4.090738169 | 2.07E-23    | 56.76822375 |
| OXA1L          | NM_005015    | 77.93822536 | 7.694207419 | 4.88E-06    | 10.12946768 |
| DCTN6          | NM_006571    | 34.55083703 | 1.522358347 | 0.002851844 | 22.6956006  |
| LOC100289230   | NR_036530    | 154.550837  | 25.88131189 | 9.31E-08    | 5.97152253  |
| LINC01135      | NR_034014    | 41.06049096 | 2.316564832 | 0.001313114 | 17.72473206 |
| XPC            | NM_001145769 | 129.8970423 | 1.951565275 | 3.82E-14    | 66.56043941 |
| TSNAX-DISC1    | NR_028396    | 99.26383906 | 0.423280033 | 2.73E-11    | 234.511036  |
| DISP2          | NM_033510    | 49.63191953 | 2.589390971 | 5.57E-05    | 19.16741044 |
| ELP2           | NM_001242878 | 115.0810825 | 1.333224383 | 1.62E-12    | 86.31786515 |
| KCTD17         | NM_001282686 | 50.16216501 | 2.889327844 | 0.000153047 | 17.36118839 |
| HOXB13         | NM_006361    | 95.61132799 | 4.779864993 | 4.76E-09    | 20.00293484 |
| LOC100507557   | NR_038244    | 78.2033481  | 0.231216121 | 1.41E-10    | 338.2261913 |
| PCBP2          | NM_001128911 | 48.83655131 | 7.757523081 | 0.003177866 | 6.29537944  |
| ZNF12          | NM_016265    | 74.07979883 | 3.182604309 | 8.70E-07    | 23.27647161 |
| ULK3           | NM_001284365 | 172.2239396 | 4.442458122 | 1.42E-18    | 38.76771259 |
| AAMDC          | NM_024684    | 134.8159598 | 0.662940185 | 3.40E-16    | 203.3606694 |
| DOLK           | NM_014908    | 161.060491  | 10.87283017 | 2.87E-12    | 14.81311567 |
| CD46           | NM_172353    | 107.0398994 | 3.125008052 | 1.26E-10    | 34.25267956 |
| COL6A4P1       | NR_027927    | 64.18275656 | 0.028752232 | 2.31E-11    | 2232.270418 |
| BBS12          | NM_001178007 | 38.46847084 | 2.383793804 | 0.00107983  | 16.1374993  |
| CDKN3          | NM_001130851 | 175.3462052 | 1.753856982 | 3.93E-20    | 99.97748225 |
| ELK1           | NM_001257168 | 89.10167405 | 0.778965752 | 1.38E-11    | 114.3845847 |
| TMEM67         | NR_024522    | 65.50837026 | 0.816334686 | 7.65E-08    | 80.24695185 |
| BABAM1         | NM_014173    | 32.48906239 | 1.938902541 | 0.004212891 | 16.75641849 |
| PSMD10         | NM_170750    | 35.34620525 | 1.930773045 | 0.001280391 | 18.30676336 |
| TRMU           | NR_104241    | 128.8365513 | 6.970649646 | 4.02E-11    | 18.48271795 |
| TMEM127        | NM_001193304 | 129.3667968 | 5.306688998 | 8.38E-12    | 24.37806264 |
| COMMD6         | NM_001287393 | 158.7335936 | 2.667333373 | 1.04E-18    | 59.51021915 |
| TBC1D24        | NM_001199107 | 34.28571429 | 1.402173635 | 0.002886788 | 24.4518321  |
| TRAF3IP2-AS1   | NR_034108    | 98.73359358 | 1.046327587 | 2.77E-11    | 94.36202848 |
| ZDHHC13        | NM_019028    | 149.6319195 | 1.233521471 | 1.95E-16    | 121.3046737 |
| AZI2           | NM_022461    | 107.8352676 | 3.209983814 | 2.32E-10    | 33.59371071 |
| FAM86B3P       | NR_024363    | 121.3256137 | 6.084070009 | 4.53E-11    | 19.94152163 |

|              |              |             |             |             |             |
|--------------|--------------|-------------|-------------|-------------|-------------|
| CHMP5        | NM_001195536 | 38.2033481  | 2.19075394  | 0.00131376  | 17.43844775 |
| CTNNB1       | NM_001098209 | 192.7541851 | 3.045226864 | 2.43E-19    | 63.29715117 |
| LETM1        | NM_012318    | 104.713002  | 3.070779889 | 1.29E-10    | 34.09980716 |
| TRIM11       | NM_145214    | 120         | 4.925137681 | 3.57E-11    | 24.3648011  |
| STAG3L5P     | NR_103720    | 200.5302455 | 4.664152393 | 1.02E-21    | 42.99393085 |
| AP2A1        | NM_014203    | 60.26512274 | 1.909286914 | 6.84E-06    | 31.56420457 |
| DUSP2        | NM_004418    | 157.6731026 | 18.2387885  | 1.19E-09    | 8.644932891 |
| ABCC5        | NM_001023587 | 66.24453119 | 1.152541343 | 6.19E-07    | 57.47692402 |
| GOLGA2P10    | NR_103496    | 54.28571429 | 3.233036449 | 3.84E-05    | 16.79093791 |
| SERINC5      | NM_178276    | 186.7747767 | 1.467820724 | 6.03E-19    | 127.246314  |
| UNC5B        | NM_170744    | 178.2033481 | 1.597417213 | 1.36E-18    | 111.5571728 |
| CA11         | NM_001217    | 61.59073644 | 11.26063436 | 0.001157609 | 5.469561879 |
| NFU1         | NR_045631    | 117.6731026 | 2.58597958  | 4.10E-12    | 45.50426598 |
| LOC101928600 | NR_109904    | 23.91763382 | 0.748569452 | 0.004865016 | 31.9511219  |
| SENP6        | NM_015571    | 161.060491  | 0.062971161 | 5.00E-26    | 2557.686524 |
| ZNF784       | NM_203374    | 60.26512274 | 1.490796863 | 2.71E-07    | 40.42477164 |
| KXD1         | NM_001171948 | 69.89704227 | 4.847525059 | 3.51E-06    | 14.41911933 |
| CACNB1       | NM_000723    | 128.5714286 | 4.168253441 | 1.87E-12    | 30.84539614 |
| WLS          | NM_001193334 | 101.8558592 | 1.300141823 | 2.73E-10    | 78.34211422 |
| TSPAN17      | NM_001006616 | 135.0810825 | 3.950307259 | 1.68E-13    | 34.19508247 |
| TFAP2A       | NM_003220    | 75.87645073 | 15.31887051 | 0.000363093 | 4.953136114 |
| NUBP2        | NM_012225    | 92.75418513 | 3.660515485 | 3.93E-09    | 25.3391047  |
| CTSB         | NM_147780    | 149.1016741 | 6.626706383 | 3.96E-13    | 22.50011777 |
| ZNF786       | NM_152411    | 190.4272878 | 5.2532106   | 1.37E-18    | 36.24969609 |
| FDX1L        | NM_001031734 | 106.2445312 | 7.17723356  | 1.19E-08    | 14.80299203 |
| AP1G2        | NM_001282475 | 92.75418513 | 14.93854056 | 1.22E-05    | 6.209052667 |
| ECE2         | NM_032331    | 109.3667968 | 7.022873336 | 4.37E-09    | 15.57294167 |
| RMND1        | NM_001271937 | 115.8764507 | 1.659858944 | 1.75E-12    | 69.8110229  |
| GLG1         | NR_027265    | 133.0193079 | 2.369189916 | 5.16E-13    | 56.1454812  |
| SENP5        | NM_152699    | 152.4890624 | 1.222702721 | 1.38E-16    | 124.7147485 |
| BBX          | NM_001276286 | 75.61132799 | 1.058878157 | 4.35E-08    | 71.40701458 |
| MTHFS        | NM_022764    | 123.6525111 | 3.15887417  | 4.07E-12    | 39.14432353 |
| ARHGAP22     | NR_045675    | 55.34620525 | 1.543044927 | 5.53E-05    | 35.86817485 |
| TRIM44       | NM_017583    | 67.57014489 | 0.769213534 | 9.24E-08    | 87.84315651 |
| RHOBTB3      | NM_014899    | 75.87645073 | 1.782917127 | 1.40E-07    | 42.55747481 |
| TAMM41       | NM_001284401 | 101.5907364 | 0.962644669 | 3.22E-11    | 105.5329549 |
| OSTF1        | NM_012383    | 218.2033481 | 1.025266821 | 5.98E-26    | 212.8259138 |
| HMGXB3       | NM_014983    | 101.060491  | 2.368193382 | 4.67E-10    | 42.67408722 |
| AJUBA        | NM_001289097 | 78.73359358 | 19.38048221 | 0.001344881 | 4.062519844 |
| CREB3L2      | NM_001253775 | 87.30502215 | 1.79585082  | 1.16E-08    | 48.61485217 |
| ETNK2        | NM_001297761 | 43.38738834 | 3.991424369 | 0.002306852 | 10.87015169 |
| LOC101927027 | NR_110205    | 101.060491  | 3.67430999  | 1.61E-09    | 27.50461753 |
| ALG8         | NM_001007027 | 79.5289618  | 1.704398034 | 2.95E-08    | 46.66102649 |
| PLA2G4C      | NM_001159323 | 92.22393965 | 0.07260958  | 7.82E-15    | 1270.134603 |
| E2F2         | NM_004091    | 98.73359358 | 5.367741134 | 4.71E-09    | 18.39388136 |
| APIB1        | NM_001166019 | 98.73359358 | 1.086976142 | 1.26E-10    | 90.83326651 |
| SFR1         | NM_001002759 | 186.7747767 | 7.64384947  | 2.99E-17    | 24.43464872 |
| MEGF11       | NM_032445    | 32.22393965 | 0.951456927 | 0.001398799 | 33.86799626 |
| ZSCAN31      | NM_001243242 | 84.4478793  | 5.018807559 | 2.51E-07    | 16.82628359 |
| ZNF302       | NM_018675    | 115.611328  | 1.801590305 | 5.22E-14    | 64.17181957 |
| CDK10        | NR_027702    | 174.6100443 | 22.07034971 | 1.04E-10    | 7.911521412 |
| ACBD7        | NM_001039844 | 33.54955335 | 0.342664337 | 2.87E-05    | 97.90792237 |
| ZFAND2B      | NM_001270999 | 114.550837  | 14.01222232 | 2.05E-07    | 8.175065627 |
| SFI1         | NM_014775    | 109.8970423 | 1.94019394  | 1.37E-10    | 56.64229747 |
| PTPN23       | NM_015466    | 149.1016741 | 2.224279883 | 1.74E-16    | 67.03368368 |
| PYCR2        | NM_001271681 | 135.611328  | 14.81152306 | 2.32E-09    | 9.155798998 |
| TCEANC2      | NM_153035    | 71.69369417 | 0.826341932 | 8.07E-09    | 86.76032454 |
| REPIN1       | NM_001099695 | 92.48906239 | 8.151391122 | 5.66E-07    | 11.3464145  |
| MROH1        | NM_001099280 | 113.2844306 | 1.120981286 | 3.17E-12    | 101.0582711 |
| MGST2        | NM_002413    | 60.79536822 | 0.479071515 | 5.47E-08    | 126.9024901 |
| VEGFA        | NM_001171627 | 197.6731026 | 8.638828102 | 8.23E-18    | 22.88193494 |
| CYFIP1       | NM_014608    | 41.06049096 | 1.610036502 | 0.001229847 | 25.50283233 |
| BTN2A2       | NM_001197238 | 33.28443061 | 0.556196291 | 0.000476506 | 59.84295674 |
| YME1L1       | NM_014263    | 76.93694168 | 1.33228422  | 5.38E-08    | 57.74814452 |

|              |              |             |             |             |             |
|--------------|--------------|-------------|-------------|-------------|-------------|
| STK25        | NM_001282308 | 46.24453119 | 8.95069745  | 0.004828982 | 5.166584107 |
| USP9X        | NM_001039591 | 27.30502215 | 1.276287091 | 0.002646389 | 21.39410667 |
| DDX54        | NM_024072    | 129.1016741 | 3.235441466 | 1.42E-12    | 39.90233648 |
| WDHD1        | NM_001008396 | 103.1222656 | 0.508266323 | 9.61E-13    | 202.8902192 |
| ORC3         | NM_012381    | 50.69241049 | 0.056928026 | 3.50E-08    | 890.4649221 |
| RELA         | NM_001243985 | 121.060491  | 5.37741608  | 1.48E-11    | 22.51276248 |
| SLC9A8       | NM_001260491 | 112.7541851 | 1.971695701 | 3.79E-11    | 57.1864031  |
| RALGPS2      | NM_152663    | 72.22393965 | 0.288053907 | 1.75E-08    | 250.7306371 |
| JMJD1C       | NM_001282948 | 78.2033481  | 1.220543071 | 1.50E-07    | 64.0725837  |
| ZFP64        | NM_018197    | 115.611328  | 3.023717456 | 1.15E-11    | 38.23483169 |
| SH3GLB1      | NM_001206653 | 121.3256137 | 1.280593639 | 2.40E-13    | 94.74169636 |
| CSTF3        | NM_001033506 | 112.4890624 | 1.391018289 | 1.75E-13    | 80.86814049 |
| DENND4C      | NM_017925    | 135.611328  | 1.145839571 | 1.33E-13    | 118.3510601 |
| TMEM123      | NM_052932    | 134.8159598 | 2.225531468 | 6.93E-14    | 60.57697306 |
| TIMM8A       | NM_001145951 | 117.6731026 | 16.19263329 | 9.20E-05    | 7.267076361 |
| AREL1        | NM_001039479 | 81.59073644 | 0.198699428 | 2.84E-12    | 410.6239117 |
| FBXO21       | NM_015002    | 167.3050222 | 2.327165892 | 4.14E-18    | 71.89217697 |
| SCAP         | NM_012235    | 113.5495533 | 1.250817874 | 3.84E-12    | 90.78024526 |
| SUCLG2       | NM_001177599 | 106.7747767 | 0.514226962 | 8.72E-12    | 207.6413423 |
| NME6         | NM_005793    | 72.75418513 | 4.635518515 | 3.51E-06    | 15.69494003 |
| KDM1B        | NM_153042    | 112.4890624 | 1.577533215 | 1.87E-11    | 71.30693753 |
| SF3B5        | NM_031287    | 137.6731026 | 27.14480879 | 0.000221626 | 5.071802263 |
| SPRY4        | NM_030964    | 172.4890624 | 9.060318825 | 2.99E-14    | 19.03785791 |
| HPS5         | NM_007216    | 138.9987163 | 1.525115026 | 1.51E-15    | 91.13982482 |
| ZKSCAN1      | NM_001287054 | 60.79536822 | 3.228233241 | 7.40E-06    | 18.83239645 |
| LOC100630923 | NR_038967    | 150.4272878 | 4.775406294 | 7.69E-14    | 31.50041661 |
| ZNF180       | NM_001288759 | 124.4478793 | 2.297668184 | 5.97E-14    | 54.16268553 |
| MARS         | NM_004990    | 44.18275656 | 3.957279257 | 0.002557727 | 11.1649327  |
| ZER1         | NM_006336    | 109.1016741 | 3.877109374 | 7.92E-10    | 28.13995261 |
| AP3S2        | NR_037582    | 140.7953682 | 2.141326458 | 1.94E-14    | 65.75147274 |
| CD99P1       | NR_033381    | 46.24453119 | 1.606773186 | 0.000170484 | 28.7809951  |
| RPARP-AS1    | NR_038937    | 130.162165  | 31.95631251 | 1.01E-05    | 4.07312843  |
| TARS2        | NR_073514    | 118.7335936 | 1.165685014 | 4.91E-15    | 101.8573561 |
| PPM1J        | NM_005167    | 143.3873883 | 11.56478511 | 4.96E-11    | 12.39862107 |
| SSBP1        | NR_046269    | 136.4066962 | 2.582832033 | 1.15E-15    | 52.81284051 |
| BRI3BP       | NM_080626    | 49.36679679 | 1.637376509 | 9.04E-05    | 30.14993591 |
| FRS2         | NM_001278355 | 135.3462052 | 0.840480368 | 1.23E-15    | 161.0343446 |
| UBE2F-SCLY   | NR_037904    | 38.2033481  | 1.707655961 | 0.002417337 | 22.37180614 |
| PREPL        | NM_001171606 | 117.4079799 | 1.523620406 | 1.09E-12    | 77.05855041 |
| EXOSC2       | NM_001282708 | 132.4890624 | 5.728547597 | 1.47E-12    | 23.12786272 |
| KLC2         | NM_022822    | 123.3873883 | 15.99585982 | 8.11E-08    | 7.713707778 |
| GGA3         | NM_001291641 | 122.6512274 | 6.367303312 | 1.75E-10    | 19.26266449 |
| MKS1         | NM_017777    | 161.060491  | 0.519868739 | 3.32E-23    | 309.809917  |
| FH           | NM_000143    | 141.5907364 | 0.64276847  | 9.32E-20    | 220.2826417 |
| WDR44        | NM_001184966 | 68.57142857 | 0.529903073 | 3.72E-08    | 129.4037195 |
| AMPD2        | NM_004037    | 60.26512274 | 3.000451894 | 1.65E-05    | 20.08534877 |
| SERPINB9     | NM_004155    | 209.8970423 | 1.771136703 | 2.39E-26    | 118.509792  |
| ATRAID       | NM_016085    | 104.4478793 | 4.399829208 | 1.98E-10    | 23.73907585 |
| CDS2         | NM_003818    | 58.2033481  | 1.345947493 | 1.68E-05    | 43.24340169 |
| PAPL         | NM_001004318 | 34.55083703 | 1.594264414 | 0.002920652 | 21.67196152 |
| TKT          | NR_047580    | 54.34492157 | 10.00944481 | 0.003292278 | 5.429364227 |
| STARD7-AS1   | NR_046322    | 224.4478793 | 2.679297644 | 2.39E-24    | 83.77116288 |
| RNH1         | NM_203384    | 93.01930787 | 6.078026002 | 4.57E-08    | 15.30419709 |
| SAE1         | NR_027280    | 133.0193079 | 4.006414192 | 4.58E-12    | 33.20158663 |
| PFKFB3       | NM_001145443 | 183.9176338 | 4.790477059 | 9.53E-17    | 38.39234205 |
| SEC31A       | NM_001077206 | 135.3462052 | 0.571896396 | 3.73E-17    | 236.6621054 |
| LOC100506368 | NR_038905    | 91.95881691 | 0.566101196 | 4.42E-12    | 162.4423647 |
| GPI          | NM_001289789 | 67.03989941 | 5.929488881 | 2.22E-05    | 11.3061852  |
| ACBD4        | NM_001135705 | 41.06049096 | 4.208256797 | 0.002797105 | 9.757125798 |
| EZH1         | NM_001991    | 97.67310262 | 0.689906879 | 2.87E-11    | 141.5743279 |
| GDI2         | NM_001494    | 98.46847084 | 3.581714173 | 1.52E-09    | 27.49199575 |
| PMF1-BGLAP   | NM_001199663 | 81.59073644 | 2.428872413 | 1.67E-08    | 33.59202238 |
| ARL15        | NM_019087    | 84.71300204 | 0.195738161 | 6.30E-10    | 432.7873605 |
| MOSPD3       | NM_023948    | 87.83526763 | 2.559522583 | 5.76E-09    | 34.31705124 |



|              |              |             |             |             |             |
|--------------|--------------|-------------|-------------|-------------|-------------|
| DCBLD2       | NM_080927    | 173.0193079 | 9.511006075 | 1.12E-13    | 18.19148327 |
| E2F6         | NM_001278277 | 50.16216501 | 4.699250262 | 0.000373475 | 10.67450385 |
| ORC1         | NM_004153    | 89.63191953 | 3.264395133 | 6.48E-09    | 27.45743572 |
| GOLGA4       | NM_001172713 | 144.4478793 | 0.563477136 | 1.55E-17    | 256.3509147 |
| SATB2        | NM_001172509 | 54.81595977 | 0.153550227 | 8.58E-07    | 356.9904173 |
| ILIR1        | NM_000877    | 68.57142857 | 0.865231934 | 1.86E-07    | 79.25207782 |
| MTMR10       | NM_017762    | 117.6731026 | 0.938237312 | 3.58E-13    | 125.419338  |
| ALDOC        | NM_005165    | 61.85585918 | 5.83460274  | 6.79E-05    | 10.60155454 |
| TSPO         | NR_046308    | 112.2239396 | 9.344128963 | 7.55E-09    | 12.01010175 |
| ABHD15       | NM_198147    | 95.61132799 | 9.875084422 | 6.79E-07    | 9.682077024 |
| BSPRY        | NM_017688    | 157.1428571 | 2.600916057 | 6.10E-17    | 60.41827329 |
| TAF15        | NM_139215    | 232.7541851 | 2.670717411 | 9.56E-25    | 87.15043537 |
| STXBP1       | NM_003165    | 171.4285714 | 1.283877681 | 1.52E-18    | 133.5240685 |
| LOC101929295 | NR_110303    | 69.89704227 | 10.05628533 | 0.000109149 | 6.950582646 |
| MBTD1        | NM_017643    | 45.50837026 | 1.143128621 | 3.02E-05    | 39.81036728 |
| PAPD4        | NM_173797    | 46.77477667 | 1.225006221 | 0.000263363 | 38.18329727 |
| PEX10        | NM_153818    | 64.4478793  | 7.830446427 | 0.000143597 | 8.230422096 |
| LRP6         | NM_002336    | 58.73359358 | 0.434169409 | 5.08E-07    | 135.2780558 |
| PNP          | NM_000270    | 226.5096539 | 4.121621352 | 7.43E-25    | 54.95644423 |
| MRPL43       | NM_176794    | 165.2432475 | 12.10537689 | 3.00E-13    | 13.65040089 |
| NT5C3B       | NR_033465    | 152.2239396 | 1.78856659  | 4.90E-19    | 85.10946167 |
| FARP1        | NM_005766    | 48.57142857 | 1.212018324 | 2.30E-05    | 40.07483022 |
| B4GALT3      | NM_001199874 | 89.89704227 | 14.52848205 | 1.75E-05    | 6.187641763 |
| AKIP1        | NR_045418    | 94.55083703 | 5.221387405 | 1.50E-08    | 18.10837421 |
| CFAP97       | NM_020827    | 157.1428571 | 2.703624249 | 1.34E-16    | 58.12303882 |
| NAA16        | NM_024561    | 124.1827566 | 0.927410429 | 1.54E-13    | 133.9026958 |
| ACP2         | NM_001131064 | 159.2638391 | 12.10277586 | 1.08E-12    | 13.15928188 |
| ARMC5        | NM_001105247 | 95.34620525 | 13.74495019 | 6.28E-06    | 6.936817081 |
| NDUFAF5      | NM_001039375 | 95.34620525 | 0.821850937 | 4.30E-11    | 116.0139886 |
| CCDC50       | NM_178335    | 61.06049096 | 1.408727791 | 8.48E-06    | 43.34442138 |
| TAF1A        | NM_001201536 | 83.38738834 | 0.494899298 | 1.59E-11    | 168.4936483 |
| POLD4        | NM_001256870 | 135.3462052 | 13.16468747 | 2.82E-09    | 10.28100406 |
| PPIE         | NR_036543    | 109.8970423 | 3.942721368 | 1.35E-10    | 27.8733981  |
| METTTL21B    | NM_206914    | 61.06049096 | 1.289726844 | 2.87E-07    | 47.34373891 |
| RABL6        | NM_001173989 | 65.71428571 | 3.06102004  | 1.69E-06    | 21.46810045 |
| URGCP        | NM_001290076 | 143.9176338 | 1.666696496 | 1.80E-15    | 86.34903486 |
| CAP1         | NM_001105530 | 93.01930787 | 4.271354407 | 2.00E-08    | 21.77747361 |
| MAU2         | NM_015329    | 83.91763382 | 2.064559852 | 1.87E-08    | 40.64674305 |
| EGLN2        | NM_080732    | 77.40797988 | 4.209546427 | 1.82E-07    | 18.3886747  |
| KIF9-AS1     | NR_033373    | 89.63191953 | 0.380451897 | 2.09E-11    | 235.5933041 |
| CLIC5        | NM_001256023 | 48.83655131 | 0.64603779  | 1.14E-05    | 75.59395454 |
| PLCB3        | NM_000932    | 168.8365513 | 8.290702515 | 1.42E-14    | 20.36456513 |
| EFHC1        | NM_018100    | 24.71300204 | 0.697194895 | 0.004244027 | 35.44633243 |
| DPH5         | NM_015958    | 90.42728775 | 1.412790448 | 7.24E-10    | 64.00615735 |
| INTS12       | NM_001142471 | 172.2239396 | 1.710965735 | 1.20E-20    | 100.6589063 |
| FKBP5        | NM_001145777 | 163.6525111 | 1.525811114 | 9.21E-17    | 107.2560749 |
| AADAT        | NM_001286682 | 100.5302455 | 0.988356522 | 9.20E-12    | 101.7145567 |
| LOC100507437 | NR_125384    | 64.18275656 | 3.551239425 | 2.68E-05    | 18.07333972 |
| SEC23B       | NM_032985    | 83.38738834 | 2.397173304 | 3.73E-08    | 34.78571541 |
| PDHB         | NR_033384    | 125.7142857 | 3.531338461 | 4.23E-13    | 35.59961389 |
| CCDC167      | NM_138493    | 75.87645073 | 4.321230749 | 5.79E-07    | 17.55899075 |
| POC1A        | NM_001161581 | 50.16216501 | 0.602488476 | 3.86E-06    | 83.25829794 |
| E2F8         | NM_001256372 | 40.79536822 | 2.123725142 | 0.000632218 | 19.20934466 |
| E2F3         | NM_001949    | 202.6512274 | 4.619664876 | 8.76E-19    | 43.86708405 |
| FAM98C       | NM_174905    | 84.4478793  | 2.564214953 | 5.14E-09    | 32.93322941 |
| GMPR2        | NM_001002002 | 67.03989941 | 3.954674085 | 9.55E-06    | 16.95206684 |
| WDR73        | NM_032856    | 106.2445312 | 4.884831874 | 1.15E-09    | 21.74988494 |
| LPAR3        | NM_012152    | 155.3462052 | 2.476227329 | 1.34E-15    | 62.73503383 |
| RAB3GAP1     | NM_012233    | 80.53024548 | 0.741446627 | 3.30E-09    | 108.6123297 |
| STX12        | NM_177424    | 124.1827566 | 0.683352998 | 1.51E-14    | 181.7256336 |
| TTK          | NM_003318    | 24.4478793  | 0.074880792 | 0.000538626 | 326.4906629 |
| FIZ1         | NM_032836    | 63.65251108 | 3.342486424 | 4.77E-06    | 19.04346136 |
| IDH3G        | NM_004135    | 46.24453119 | 1.648190774 | 4.07E-05    | 28.05775395 |
| SOGA1        | NM_080627    | 37.14285714 | 3.112885246 | 0.002446438 | 11.93197121 |

|          |              |             |             |             |             |
|----------|--------------|-------------|-------------|-------------|-------------|
| RNF24    | NM_001134337 | 106.7747767 | 0.340185884 | 7.34E-14    | 313.8718613 |
| STAM     | NM_003473    | 61.85585918 | 0.723191133 | 1.72E-07    | 85.53182746 |
| DNAJC10  | NM_001271581 | 198.2033481 | 0.702506611 | 3.40E-24    | 282.1373422 |
| RABGAP1L | NM_014857    | 115.8764507 | 0.031904536 | 8.39E-16    | 3631.974183 |
| BBS4     | NM_001252678 | 126.7747767 | 0.689074734 | 7.03E-15    | 183.9782687 |
| ATG10    | NM_031482    | 163.1222656 | 0.192996652 | 2.49E-20    | 845.20775   |
| AEBP2    | NM_001114176 | 114.550837  | 1.494764579 | 1.18E-11    | 76.6347013  |
| PML      | NM_033246    | 58.46847084 | 0.13004774  | 9.65E-09    | 449.5923622 |
| MRPS31P5 | NR_051965    | 98.99871632 | 2.199729362 | 8.95E-11    | 45.00495289 |
| AFAP1L1  | NM_001146337 | 63.1222656  | 0.508296261 | 8.98E-08    | 124.1840052 |
| CHCHD10  | NM_001301339 | 207.3050222 | 2.109130429 | 1.12E-23    | 98.28933257 |
| FOXJ2    | NM_018416    | 89.36679679 | 4.290182125 | 4.98E-08    | 20.83053684 |
| MCM8     | NM_001281520 | 98.46847084 | 1.933638668 | 5.02E-10    | 50.92392517 |
| EMC4     | NM_016454    | 86.77477667 | 1.272885313 | 3.34E-11    | 68.1717165  |
| FUS      | NM_001170634 | 277.9382254 | 11.5626957  | 1.59E-24    | 24.03749373 |
| MESP2    | NM_001039958 | 52.48906239 | 8.920340784 | 0.00329114  | 5.884199232 |
| TNK1     | NM_001251902 | 150.162165  | 19.0284196  | 2.27E-09    | 7.891468036 |
| CPSF2    | NM_017437    | 135.3462052 | 0.998456307 | 1.02E-15    | 135.5554612 |
| AMOTL2   | NM_001278685 | 67.03989941 | 6.360961912 | 7.22E-05    | 10.53927069 |
| ALDH3B1  | NM_001290059 | 98.99871632 | 7.674400517 | 3.44E-08    | 12.89986314 |
| CHP1     | NM_007236    | 58.73359358 | 1.838307712 | 8.14E-06    | 31.94981623 |
| SRP9     | NM_003133    | 104.713002  | 1.748491854 | 5.44E-12    | 59.88761217 |
| TRIM38   | NM_006355    | 52.48906239 | 3.711683671 | 0.000351807 | 14.14157752 |
| TARDBP   | NM_007375    | 136.1415735 | 4.282112242 | 1.66E-13    | 31.79308849 |
| PLEKHD1  | NM_001161498 | 37.14285714 | 0.338036971 | 6.81E-05    | 109.8780914 |
| KLHL28   | NM_017658    | 141.3256137 | 0.563956915 | 3.17E-18    | 250.5964726 |
| TRIT1    | NM_017646    | 127.3050222 | 0.276354267 | 2.66E-19    | 460.6587889 |
| MCUR1    | NM_001031713 | 160.7953682 | 2.389269948 | 6.27E-17    | 67.29895396 |
| WDR76    | NM_001167941 | 73.54955335 | 0.412922894 | 3.78E-10    | 178.1193398 |
| C3orf17  | NM_015412    | 96.40669621 | 3.038252034 | 1.45E-09    | 31.73097397 |
| CTU2     | NM_001012759 | 104.1827566 | 5.103850609 | 1.30E-09    | 20.41257955 |
| CCDC115  | NM_032357    | 80.79536822 | 8.235104374 | 7.36E-06    | 9.811092191 |
| CDK1     | NM_001170406 | 49.89704227 | 4.090570002 | 0.000339423 | 12.19806586 |
| PEX11A   | NM_003847    | 101.060491  | 0.15556924  | 7.35E-17    | 649.6174374 |
| VMA21    | NM_001017980 | 100.5302455 | 0.682179707 | 4.00E-14    | 147.366221  |
| FBXO28   | NM_001136115 | 123.6525111 | 1.243229934 | 1.36E-13    | 99.46069321 |
| MMS19    | NM_022362    | 61.59073644 | 5.933781204 | 4.27E-05    | 10.3796777  |
| UBR7     | NR_038150    | 133.0193079 | 1.737965749 | 6.15E-16    | 76.53735865 |
| PRSS23   | NR_120593    | 80.53024548 | 1.177619221 | 6.89E-09    | 68.38394284 |
| XRN1     | NM_001282857 | 87.03989941 | 0.105476271 | 4.61E-12    | 825.208351  |
| SPOCD1   | NM_001281987 | 117.4079799 | 1.85935268  | 3.05E-13    | 63.14454551 |
| SWAP70   | NM_001297714 | 85.97940845 | 1.912832739 | 2.49E-08    | 44.94873321 |
| SMC3     | NM_005445    | 161.5907364 | 1.705353613 | 1.33E-18    | 94.75497351 |
| WDR34    | NM_052844    | 118.9987163 | 7.437620029 | 3.93E-10    | 15.9995692  |
| PEX2     | NM_001079867 | 70.16216501 | 1.958012125 | 1.22E-07    | 35.83336595 |
| FAM86EP  | NR_024253    | 91.95881691 | 6.006212734 | 1.09E-07    | 15.31061602 |
| KIAA1731 | NM_033395    | 106.7747767 | 1.61702957  | 8.80E-11    | 66.03143113 |
| FBXO18   | NM_001258452 | 167.3050222 | 2.572089889 | 7.13E-18    | 65.0463356  |
| STRIP1   | NM_033088    | 106.7747767 | 1.547050976 | 1.97E-12    | 69.01826658 |
| ORMDL3   | NM_139280    | 100.5302455 | 6.643429708 | 1.44E-08    | 15.13228105 |
| DHX29    | NM_019030    | 130.6924105 | 0.636205136 | 7.36E-16    | 205.4249535 |
| ZYG11B   | NM_024646    | 147.0398994 | 0.234000315 | 3.73E-20    | 628.3747932 |
| ZNF57    | NM_173480    | 111.9588169 | 1.94644416  | 4.73E-13    | 57.51966544 |
| ACIN1    | NM_001164816 | 75.08108251 | 7.066100199 | 8.12E-06    | 10.62553324 |
| NUP107   | NM_020401    | 101.060491  | 0.896921526 | 5.82E-11    | 112.6748417 |
| VIPAS39  | NM_022067    | 144.1827566 | 0.040456607 | 1.19E-24    | 3563.886506 |
| PLEKHF2  | NM_024613    | 136.6718189 | 0.330367032 | 1.42E-20    | 413.6969064 |
| ACTN1    | NM_001130004 | 152.2239396 | 3.17504192  | 7.73E-15    | 47.94391491 |
| SLC30A5  | NM_001251969 | 90.42728775 | 2.212108044 | 6.22E-10    | 40.87833233 |
| TRAP1    | NM_016292    | 172.7541851 | 1.937942504 | 2.51E-18    | 89.14309107 |
| MYLK-AS1 | NR_038266    | 64.71300204 | 2.35672472  | 2.21E-06    | 27.45887184 |
| PIIG     | NM_004792    | 71.95881691 | 0.17248316  | 1.37E-10    | 417.1932906 |
| UBE4B    | NM_001105562 | 115.0810825 | 0.334082142 | 4.10E-14    | 344.4694226 |
| RNF170   | NM_001160224 | 105.9794085 | 0.653446814 | 1.97E-12    | 162.1852095 |

|              |              |             |             |             |             |
|--------------|--------------|-------------|-------------|-------------|-------------|
| COPG2        | NM_012133    | 95.08108251 | 0.26103939  | 2.15E-11    | 364.2403637 |
| PDSS2        | NM_020381    | 67.83526763 | 0.470622042 | 1.14E-07    | 144.1395887 |
| APBB2        | NM_001166050 | 75.61132799 | 1.534595768 | 6.94E-07    | 49.27116937 |
| SLC25A12     | NM_003705    | 89.36679679 | 1.251175478 | 9.76E-09    | 71.42626942 |
| TRAF3IP2     | NR_028338    | 49.36679679 | 1.065962363 | 9.56E-06    | 46.31195107 |
| CMPK1        | NM_001136140 | 123.6525111 | 2.400793103 | 9.06E-13    | 51.50485934 |
| DDX26B       | NM_182540    | 71.95881691 | 0.129070744 | 9.44E-11    | 557.5145424 |
| PIGT         | NR_047691    | 127.5701449 | 1.717988632 | 7.11E-16    | 74.2555233  |
| NXF1         | NM_006362    | 197.2020644 | 6.462963132 | 6.05E-19    | 30.51263954 |
| TMED7        | NM_181836    | 55.61132799 | 1.46784941  | 4.85E-06    | 37.88626246 |
| MDM4         | NM_001204172 | 116.4066962 | 2.266395476 | 2.95E-12    | 51.3620405  |
| PLRG1        | NM_001201564 | 87.57014489 | 1.476048067 | 1.31E-10    | 59.32743442 |
| NMU          | NM_001292045 | 140.7953682 | 1.050238297 | 1.92E-16    | 134.0604019 |
| SMAGP        | NM_001031628 | 74.55083703 | 2.181928869 | 1.01E-07    | 34.16740027 |
| PPP2R1B      | NM_002716    | 155.0810825 | 0.787238346 | 3.01E-20    | 196.9938116 |
| RAB10        | NM_016131    | 51.69369417 | 2.648830426 | 0.000101484 | 19.51566761 |
| TMEM116      | NM_138341    | 133.0193079 | 0.487675137 | 3.27E-17    | 272.7621275 |
| LOC100507316 | NR_120682    | 102.3861047 | 17.72061658 | 4.84E-05    | 5.777795833 |
| ICK          | NM_016513    | 100.7953682 | 0.638677476 | 1.29E-12    | 157.8188868 |
| PLA2R1       | NM_007366    | 26.24453119 | 0.009339285 | 0.000197112 | 2810.122066 |
| IL13RA1      | NM_001560    | 88.83655131 | 0.421323566 | 1.66E-11    | 210.851133  |
| PCCA         | NM_001178004 | 100.7953682 | 0.45932587  | 5.57E-11    | 219.4419581 |
| ELMOD2       | NM_153702    | 138.9987163 | 1.24863663  | 8.75E-17    | 111.3203898 |
| WARS         | NM_173701    | 48.36551311 | 1.808711509 | 0.000119038 | 26.74031369 |
| ZNF277       | NM_021994    | 38.73359358 | 0.404797557 | 9.95E-05    | 95.68633227 |
| GNPNAT1      | NM_198066    | 177.9382254 | 3.061338281 | 7.48E-20    | 58.12432636 |
| GNPDA2       | NM_001270880 | 135.611328  | 2.970708721 | 1.42E-13    | 45.64948662 |
| CREBZF       | NR_028027    | 135.3462052 | 4.627491132 | 3.27E-13    | 29.24829057 |
| JAK2         | NM_004972    | 138.2033481 | 0.331098413 | 3.02E-17    | 417.4086693 |
| SEPHS2       | NM_012248    | 99.26383906 | 15.45902235 | 1.42E-05    | 6.421094222 |
| NIP7         | NM_016101    | 78.2033481  | 7.908699271 | 8.72E-06    | 9.888269288 |
| TNFAIP8      | NM_001286817 | 73.81467609 | 1.171685043 | 2.70E-08    | 62.99873546 |
| MAT2A        | NM_005911    | 168.8957586 | 25.68573482 | 1.82E-09    | 6.575469216 |
| NCAPH        | NM_001281711 | 115.0810825 | 4.390856955 | 2.35E-10    | 26.20925338 |
| CDKN1C       | NM_001122631 | 78.46847084 | 14.10369195 | 0.000364427 | 5.563682979 |
| MCM9         | NM_153255    | 91.69369417 | 2.210652462 | 8.35E-10    | 41.4781137  |
| ACAD11       | NM_032169    | 121.3256137 | 0.317889728 | 1.09E-15    | 381.6594338 |
| PPIB         | NM_000942    | 117.6731026 | 12.88966771 | 2.78E-08    | 9.129258042 |
| PWWP2A       | NM_001130864 | 172.4890624 | 0.786139552 | 7.42E-23    | 219.4127773 |
| NR1D1        | NM_021724    | 96.93694168 | 12.8526666  | 2.98E-06    | 7.542165739 |
| ZC3H12A      | NM_025079    | 126.2445312 | 12.37794131 | 6.63E-09    | 10.19915413 |
| RPP40        | NM_006638    | 110.162165  | 2.054390738 | 3.32E-13    | 53.62279093 |
| TPGS1        | NM_033513    | 74.55083703 | 1.325177986 | 5.19E-09    | 56.25722568 |
| SLC25A29     | NM_152333    | 98.46847084 | 4.710685483 | 3.14E-09    | 20.90321487 |
| FLVCR2       | NM_017791    | 52.22393965 | 0.014854136 | 3.21E-09    | 3515.784327 |
| CLPSL2       | NM_001286550 | 41.3256137  | 4.774641012 | 0.004129037 | 8.655229492 |
| SYNRG        | NM_198882    | 103.6525111 | 0.653734365 | 2.63E-12    | 158.5544781 |
| RPS14        | NM_005617    | 155.8764507 | 8.116211348 | 4.31E-14    | 19.20556822 |
| RCL1         | NM_005772    | 72.48906239 | 0.290985126 | 1.61E-09    | 249.1160408 |
| CHID1        | NM_001142677 | 118.4684708 | 3.519263165 | 8.63E-11    | 33.66286216 |
| PARS2        | NM_152268    | 144.4478793 | 5.473633358 | 2.45E-14    | 26.38976158 |
| CDH22        | NM_021248    | 69.10167405 | 1.331170073 | 1.61E-06    | 51.91047746 |
| LOC102723809 | NR_110550    | 52.22393965 | 1.076480238 | 2.11E-05    | 48.51360743 |
| LINC01012    | NR_038293    | 44.71300204 | 2.270655533 | 0.000136822 | 19.69167114 |
| RCHY1        | NM_015436    | 86.24453119 | 2.071151714 | 7.80E-09    | 41.64085645 |
| MKRN1        | NM_001145125 | 93.01930787 | 2.267746701 | 3.39E-10    | 41.01838526 |
| STMN2        | NM_007029    | 41.3256137  | 0.580554132 | 6.56E-05    | 71.18304981 |
| NEMF         | NM_004713    | 108.1003904 | 1.525765002 | 3.71E-11    | 70.84996067 |
| FLNB         | NM_001164319 | 195.611328  | 1.090397716 | 3.59E-20    | 179.394477  |
| CRYZL1       | NM_145858    | 109.8970423 | 1.288459764 | 1.20E-11    | 85.29334428 |
| SAMD8        | NM_001174156 | 149.3667968 | 0.341016495 | 1.41E-20    | 438.0046097 |
| PROSC        | NM_007198    | 118.4684708 | 2.812935987 | 3.53E-12    | 42.1155943  |
| TLL1         | NM_012464    | 32.75418513 | 0.367971457 | 0.00112734  | 89.01284187 |
| NQO1         | NM_001286137 | 84.18275656 | 10.10584068 | 8.92E-06    | 8.330109212 |

|              |              |             |             |             |             |
|--------------|--------------|-------------|-------------|-------------|-------------|
| TMEM50B      | NM_006134    | 148.8365513 | 0.784900821 | 3.88E-19    | 189.62466   |
| TMEM246      | NM_032342    | 129.8970423 | 4.410109519 | 1.52E-12    | 29.45438015 |
| PIR          | NM_003662    | 43.91763382 | 0.575251406 | 5.00E-05    | 76.3451134  |
| PAF1         | NR_046384    | 106.2445312 | 18.98565469 | 1.37E-05    | 5.596042536 |
| ASL          | NM_001024944 | 175.8764507 | 1.743018827 | 2.01E-21    | 100.9033569 |
| GSTK1        | NM_015917    | 194.0797988 | 5.94895098  | 9.08E-20    | 32.62420542 |
| SRD5A3       | NM_024592    | 107.0398994 | 3.257590163 | 5.15E-10    | 32.85861451 |
| CDK20        | NM_001170640 | 35.34620525 | 0.456842992 | 0.000279437 | 77.37057563 |
| KIF1C        | NM_006612    | 66.24453119 | 2.843886165 | 1.82E-06    | 23.29366485 |
| TPRKB        | NM_016058    | 68.63063585 | 4.937459561 | 9.32E-06    | 13.89998946 |
| BDNF-AS      | NR_033312    | 180         | 0.656155484 | 1.34E-20    | 274.3252238 |
| ERBB2        | NM_001289937 | 76.93694168 | 4.013207269 | 1.02E-06    | 19.17093649 |
| NGFR         | NM_002507    | 197.4079799 | 4.544806183 | 8.80E-20    | 43.43595126 |
| TBCEL        | NM_152715    | 63.91763382 | 0.69647678  | 1.38E-07    | 91.77281376 |
| FAM63B       | NM_001040453 | 73.81467609 | 1.058443112 | 1.60E-08    | 69.73891676 |
| ARSG         | NM_014960    | 93.28443061 | 4.941657336 | 6.57E-08    | 18.87715482 |
| CEP63        | NM_001042384 | 81.85585918 | 0.477667378 | 3.48E-10    | 171.3658143 |
| PDRG1        | NM_030815    | 71.22265597 | 5.575423426 | 4.85E-06    | 12.77439407 |
| SP3          | NM_001172712 | 140.7953682 | 3.868405152 | 7.19E-13    | 36.39623118 |
| STEAP1B      | NM_001164460 | 52.22393965 | 0.499629089 | 2.24E-06    | 104.5254186 |
| ZNF74        | NM_001256525 | 141.8558592 | 4.220537847 | 4.87E-14    | 33.61084874 |
| PSMA5        | NM_001199772 | 124.1827566 | 1.91658833  | 8.40E-14    | 64.79365162 |
| ASB16-AS1    | NR_049730    | 145.2432475 | 4.297376113 | 5.81E-15    | 33.79812325 |
| DPM1         | NM_003859    | 113.2844306 | 3.397233165 | 4.19E-11    | 33.34608639 |
| STYK1        | NM_018423    | 46.50965393 | 0.992575029 | 2.13E-05    | 46.85757005 |
| NCOA7        | NM_001122842 | 145.2432475 | 0.413586421 | 6.31E-18    | 351.1799235 |
| HADHB        | NM_001281513 | 100.2651227 | 0.286575619 | 1.53E-14    | 349.8731787 |
| BDH1         | NM_203314    | 106.7747767 | 2.9969537   | 1.31E-10    | 35.62776985 |
| TTPAL        | NM_001039199 | 187.8352676 | 3.965326114 | 3.22E-19    | 47.36943752 |
| LGR4         | NM_018490    | 38.46847084 | 0.329811553 | 0.000159444 | 116.6377299 |
| IVNS1ABP     | NM_006469    | 169.3667968 | 3.939189664 | 1.54E-17    | 42.99533946 |
| DEF6         | NM_022047    | 70.69241049 | 3.637313507 | 3.01E-06    | 19.4353361  |
| FKBP1A       | NM_001199786 | 138.2033481 | 4.075075242 | 1.75E-13    | 33.91430585 |
| VWA8-AS1     | NR_039974    | 121.060491  | 1.057403842 | 3.06E-15    | 114.488416  |
| ACSS2        | NM_018677    | 107.3050222 | 2.514283695 | 5.59E-11    | 42.67816809 |
| TCEAL4       | NM_024863    | 57.93822536 | 6.629719334 | 0.000464864 | 8.739167142 |
| GTF3C2       | NM_001035521 | 53.54955335 | 2.070659551 | 2.51E-05    | 25.86110949 |
| ZNF28        | NR_036600    | 81.06049096 | 0.052150895 | 1.51E-14    | 1554.345143 |
| TMEM164      | NM_032227    | 75.08108251 | 0.723877306 | 2.34E-08    | 103.7207298 |
| GSTO2        | NM_001191014 | 113.2844306 | 1.378825942 | 1.70E-13    | 82.16006618 |
| LOC100288152 | NR_125375    | 132.2239396 | 14.93070443 | 6.09E-09    | 8.855840677 |
| KCTD5        | NM_018992    | 203.6525111 | 2.105526828 | 5.15E-23    | 96.72282887 |
| PELO         | NM_015946    | 95.34620525 | 8.118887045 | 4.90E-07    | 11.74375314 |
| DHRS4        | NM_021004    | 167.5701449 | 2.517253075 | 1.73E-19    | 66.56865237 |
| SULT1A1      | NM_177536    | 103.9176338 | 1.216338012 | 1.21E-12    | 85.43483206 |
| RPS19        | NM_001022    | 78.46847084 | 14.39317389 | 0.000283474 | 5.451783703 |
| ITGB4        | NM_001005731 | 68.36551311 | 7.117202379 | 5.74E-05    | 9.605672211 |
| SNAI1        | NM_005985    | 180.2651227 | 8.55349954  | 7.21E-16    | 21.07501402 |
| ENY2         | NM_001193557 | 194.0797988 | 2.627212295 | 7.93E-23    | 73.87290292 |
| MSLN         | NM_001177355 | 95.34620525 | 4.881778104 | 9.42E-09    | 19.53104038 |
| HEATR6       | NM_022070    | 152.7541851 | 1.122443232 | 3.60E-18    | 136.0907891 |
| G3BP2        | NM_203504    | 121.8558592 | 2.985350253 | 6.42E-12    | 40.81794391 |
| ST20         | NR_037652    | 103.9176338 | 2.769867441 | 6.14E-11    | 37.51718666 |
| EYA3         | NM_001990    | 90.69241049 | 1.634294586 | 7.01E-09    | 55.49330657 |
| ZNF37A       | NM_003421    | 56.14157347 | 0.640239105 | 1.41E-07    | 87.688448   |
| CABIN1       | NM_001199281 | 135.3462052 | 1.637275219 | 3.38E-13    | 82.66551868 |
| ZNF584       | NM_173548    | 89.63191953 | 0.929487649 | 4.54E-12    | 96.43153363 |
| ANKRD12      | NM_015208    | 75.34620525 | 0.575655617 | 1.49E-08    | 130.8876401 |
| SPCS3        | NM_021928    | 169.3667968 | 3.215810648 | 2.32E-18    | 52.66690591 |
| TSPAN6       | NM_003270    | 32.48906239 | 1.076905826 | 0.002135383 | 30.16889833 |
| RNF34        | NM_025126    | 156.4066962 | 3.613453072 | 5.22E-16    | 43.28455167 |
| FBXO41       | NM_001080410 | 88.57142857 | 13.42372079 | 1.09E-05    | 6.598128039 |
| RBBP6        | NM_018703    | 159.5289618 | 1.699596548 | 1.79E-18    | 93.86284176 |
| MZT1         | NM_001071775 | 61.3256137  | 2.024451783 | 3.06E-06    | 30.29245459 |

|            |              |             |             |             |             |
|------------|--------------|-------------|-------------|-------------|-------------|
| OSTC       | NM_021227    | 98.2033481  | 0.350691763 | 3.67E-14    | 280.0275296 |
| ECT2       | NM_001258316 | 79.5289618  | 1.30640916  | 5.08E-08    | 60.87599829 |
| FAHD1      | NM_031208    | 90.69241049 | 2.400451174 | 3.55E-09    | 37.78140187 |
| MAPK7      | NM_139034    | 71.69369417 | 6.274476225 | 1.36E-05    | 11.42624366 |
| PARP11     | NR_104461    | 23.91763382 | 0.102231596 | 0.003313529 | 233.9553979 |
| ZFP1       | NM_153688    | 151.6936942 | 0.633799825 | 6.50E-21    | 239.3400697 |
| 6-Mar      | NM_001270660 | 111.9588169 | 1.970626641 | 4.35E-11    | 56.81381475 |
| BIRC2      | NM_001256166 | 107.3050222 | 1.77514118  | 6.61E-12    | 60.44872565 |
| IQCC       | NM_001160042 | 97.67310262 | 15.02200092 | 6.06E-06    | 6.502003506 |
| NDUFS5     | NM_004552    | 138.7335936 | 3.58355069  | 3.15E-15    | 38.71400339 |
| HEXB       | NM_000521    | 174.8159598 | 1.532493043 | 2.07E-20    | 114.0729222 |
| ATP11B     | NM_014616    | 107.0398994 | 0.489855221 | 1.21E-12    | 218.5133381 |
| G3BP1      | NM_005754    | 132.2239396 | 1.7506132   | 1.06E-14    | 75.53007119 |
| CDAN1      | NM_138477    | 145.9794085 | 7.874268187 | 1.48E-12    | 18.53879052 |
| SERINC3    | NM_198941    | 60.79536822 | 4.06420607  | 5.38E-05    | 14.95873171 |
| FAM83B     | NM_001010872 | 75.34620525 | 0.508763803 | 6.11E-09    | 148.096631  |
| MRPS2      | NM_016034    | 97.93822536 | 17.3181484  | 1.51E-05    | 5.655236524 |
| FN3KRP     | NR_046408    | 89.63191953 | 0.242676169 | 1.01E-13    | 369.3478421 |
| TBC1D12    | NM_015188    | 143.6525111 | 0.262672952 | 9.86E-19    | 546.887336  |
| COL4A3     | NM_000091    | 78.73359358 | 0.995014478 | 6.36E-09    | 79.12808838 |
| C21orf88   | NR_026543    | 46.77477667 | 0.182006269 | 5.31E-07    | 256.9954156 |
| CPSF7      | NM_001136040 | 93.81467609 | 3.327645626 | 1.06E-08    | 28.19250805 |
| MAP3K7     | NM_145332    | 49.10167405 | 1.583779808 | 0.00014887  | 31.0028413  |
| DNAH14     | NM_001145154 | 169.8970423 | 0.485839328 | 1.38E-21    | 349.6980019 |
| RNASEH1    | NM_001286837 | 101.5907364 | 0.699449524 | 2.29E-14    | 145.2438425 |
| ZNF142     | NR_073600    | 59.26383906 | 1.29150618  | 1.78E-06    | 45.88738328 |
| PTGES2     | NM_025072    | 106.5096539 | 8.023677415 | 8.40E-09    | 13.27441875 |
| SSR3       | NM_007107    | 103.6525111 | 3.217190484 | 2.17E-10    | 32.21833198 |
| ATP6V1F    | NM_001198909 | 134.8159598 | 12.97120371 | 1.11E-09    | 10.39348103 |
| EIF2B2     | NM_014239    | 83.91763382 | 5.521443247 | 1.86E-07    | 15.19849613 |
| ZNF653     | NM_138783    | 83.18147288 | 3.944832799 | 1.83E-07    | 21.08618466 |
| TCEANC     | NM_001297564 | 43.38738834 | 1.05057679  | 8.83E-05    | 41.29863589 |
| SNHG1      | NR_003098    | 165.2432475 | 25.17767999 | 2.18E-09    | 6.563084748 |
| ANKRD10    | NM_017664    | 120.7953682 | 5.336523652 | 6.60E-11    | 22.63559128 |
| HS2ST1     | NM_001134492 | 109.8970423 | 1.034827153 | 5.98E-12    | 106.1984525 |
| MRPL21     | NM_181514    | 116.4066962 | 4.473048127 | 4.95E-11    | 26.02402051 |
| PTPRK      | NM_002844    | 135.3462052 | 0.318530448 | 7.59E-15    | 424.9082189 |
| MRPL12     | NM_002949    | 129.8970423 | 6.906054249 | 2.01E-11    | 18.80915463 |
| RPL9       | NM_000661    | 142.1209819 | 15.47426426 | 1.57E-09    | 9.184345023 |
| METTL21A   | NM_145280    | 53.01930787 | 1.012668283 | 3.50E-06    | 52.35604666 |
| SLC36A4    | NM_152313    | 138.2033481 | 0.066730125 | 2.94E-23    | 2071.078819 |
| TOP1       | NM_003286    | 144.1827566 | 1.913882567 | 1.97E-14    | 75.33521599 |
| HECTD2     | NM_001284274 | 100.2651227 | 0.561008449 | 4.96E-12    | 178.7230174 |
| ADAM9      | NR_027638    | 67.83526763 | 1.344819826 | 1.41E-06    | 50.44190033 |
| CAMTA2     | NM_015099    | 135.8764507 | 5.70153802  | 2.21E-12    | 23.83154339 |
| SLC27A4    | NM_005094    | 52.22393965 | 1.84639005  | 3.12E-05    | 28.28434851 |
| FAM200A    | NM_145111    | 64.71300204 | 1.615242026 | 1.61E-07    | 40.06396625 |
| CCDC127    | NM_145265    | 118.7335936 | 0.33243302  | 8.81E-19    | 357.165463  |
| CBX8       | NM_020649    | 82.12098192 | 14.11781037 | 0.000112707 | 5.816835599 |
| ZNF837     | NM_138466    | 155.8764507 | 5.671434131 | 2.47E-15    | 27.48448578 |
| MAP3K3     | NM_002401    | 35.08108251 | 1.763022932 | 0.004159164 | 19.89825649 |
| RAET1E-AS1 | NR_045126    | 38.2033481  | 3.26666122  | 0.002342395 | 11.69492198 |
| AHI1       | NM_001134831 | 163.6525111 | 0.338000062 | 1.15E-19    | 484.1789384 |
| NSRP1      | NM_032141    | 121.8558592 | 1.265416159 | 5.21E-13    | 96.29706267 |
| ATRN       | NM_139322    | 98.2033481  | 0.463415538 | 1.66E-11    | 211.9120748 |
| PTPRJ      | NM_001098503 | 31.95881691 | 0.417698611 | 0.001027433 | 76.51166665 |
| AIF1L      | NM_031426    | 137.1428571 | 3.364239914 | 1.33E-13    | 40.76488617 |
| CHRNA7     | NM_001190455 | 160.5302455 | 0.689207083 | 1.04E-18    | 232.9201912 |
| CEP76      | NR_073537    | 95.61132799 | 1.596059854 | 5.90E-10    | 59.90460054 |
| NOL12      | NM_024313    | 116.4066962 | 13.51022317 | 2.85E-08    | 8.616193436 |
| PLEKHM1    | NR_027782    | 283.4465956 | 11.42634353 | 2.39E-23    | 24.80641292 |
| AXL        | NM_001699    | 98.73359358 | 4.640852316 | 7.91E-09    | 21.27488376 |
| CEP57      | NM_014679    | 103.6525111 | 1.210197743 | 2.71E-11    | 85.64923517 |
| DNAJB6     | NM_058246    | 80.53024548 | 1.526784081 | 7.23E-08    | 52.74501251 |

|               |              |             |             |             |             |
|---------------|--------------|-------------|-------------|-------------|-------------|
| IGSF8         | NM_001206665 | 43.1222656  | 1.733882573 | 7.83E-05    | 24.87034951 |
| RBBP5         | NM_001193273 | 147.3050222 | 0.193374081 | 1.58E-22    | 761.7619758 |
| GRAMD1A       | NM_001136199 | 60.79536822 | 5.129803632 | 6.20E-05    | 11.85140262 |
| SNUPN         | NM_001042588 | 49.10167405 | 3.393947878 | 0.000135333 | 14.46742137 |
| PAOX          | NR_109764    | 29.63191953 | 0.340904502 | 0.000250304 | 86.9214673  |
| ATG101        | NM_001098673 | 120.5302455 | 2.888350118 | 3.65E-13    | 41.72979056 |
| PARN          | NM_001134477 | 181.060491  | 0.762728622 | 2.73E-20    | 237.385206  |
| ASNS          | NM_183356    | 109.3667968 | 2.087047654 | 2.62E-12    | 52.40263516 |
| CTPS1         | NR_125440    | 160.5302455 | 5.651989688 | 3.22E-14    | 28.40243071 |
| LOC100131691  | NR_027334    | 79.5289618  | 14.57222582 | 0.00019537  | 5.457571326 |
| AURKB         | NM_001284526 | 164.1827566 | 11.51076214 | 3.92E-13    | 14.26341319 |
| C2orf76       | NM_001017927 | 90.42728775 | 0.639895308 | 2.29E-11    | 141.3157538 |
| PHF12         | NM_001033561 | 63.65251108 | 2.008255996 | 3.96E-06    | 31.69541692 |
| UTP3          | NM_020368    | 95.61132799 | 9.000368024 | 9.87E-07    | 10.62304649 |
| ZDHHC2        | NM_016353    | 54.81595977 | 0.587409969 | 1.34E-06    | 93.31806179 |
| KIAA0100      | NM_014680    | 106.7747767 | 3.448178854 | 7.63E-10    | 30.96555637 |
| CCNB1IP1      | NM_182852    | 60.79536822 | 2.328300149 | 4.32E-06    | 26.11148234 |
| TMEM165       | NR_073070    | 124.9781248 | 2.266897333 | 1.02E-13    | 55.13179753 |
| RPLP1         | NM_001003    | 184.4478793 | 28.70028984 | 6.21E-10    | 6.426690474 |
| RPTOR         | NM_020761    | 67.30502215 | 0.70402875  | 1.72E-07    | 95.59982057 |
| TRMT5         | NM_020810    | 126.5096539 | 1.712775399 | 1.38E-15    | 73.86237216 |
| HAPI          | NM_177977    | 206.2445312 | 2.998593129 | 6.47E-24    | 68.78043213 |
| HNRNPAB       | NM_004499    | 178.7335936 | 21.65186087 | 9.63E-12    | 8.254883711 |
| SLC22A4       | NM_003059    | 44.97812478 | 1.339694579 | 0.00022077  | 33.57341703 |
| SNHG7         | NR_024543    | 210.162165  | 33.23420867 | 3.94E-11    | 6.3236699   |
| TAF4          | NM_003185    | 77.40797988 | 0.273216038 | 4.67E-10    | 283.3215081 |
| NDUFS1        | NM_001199982 | 69.10167405 | 1.247253417 | 3.55E-07    | 55.40307455 |
| CD59          | NM_203330    | 169.1016741 | 3.725802659 | 1.02E-16    | 45.3866427  |
| SUMO1         | NM_001005781 | 109.3667968 | 1.243855761 | 2.19E-12    | 87.92562626 |
| STAG2         | NM_001282418 | 60.26512274 | 0.615122095 | 6.87E-07    | 97.97261922 |
| BBS7          | NM_176824    | 184.4478793 | 0.384870036 | 8.43E-26    | 479.2471802 |
| SNRNP200      | NM_014014    | 143.3873883 | 2.272423197 | 8.54E-16    | 63.09889309 |
| HR            | NM_018411    | 48.83655131 | 4.446865989 | 0.000601473 | 10.9822404  |
| ERICH1        | NM_207332    | 92.22393965 | 1.333287984 | 2.45E-09    | 69.17030734 |
| NUBP1         | NM_001278506 | 155.611328  | 1.17611199  | 2.44E-19    | 132.309958  |
| NSMAF         | NM_003580    | 74.81595977 | 1.417403842 | 2.64E-07    | 52.7837992  |
| SUOX          | NM_001032387 | 129.3667968 | 4.317450591 | 2.52E-13    | 29.96370059 |
| SLMO2-ATP5E   | NR_037930    | 78.46847084 | 10.98809552 | 2.77E-05    | 7.141225767 |
| NOTCH2NL      | NM_203458    | 233.0193079 | 2.527372763 | 1.50E-24    | 92.19823498 |
| PRDX1         | NM_181696    | 181.3256137 | 10.15673987 | 1.62E-15    | 17.85273779 |
| DBI           | NM_001178017 | 49.36679679 | 7.067734561 | 0.001327222 | 6.984811946 |
| SMARCA4       | NM_001128849 | 54.55083703 | 1.211372155 | 3.86E-06    | 45.03226922 |
| BMP8A         | NM_181809    | 108.8365513 | 1.341696776 | 5.17E-12    | 81.11859048 |
| UEVLD         | NM_001040697 | 137.6731026 | 0.865241159 | 9.03E-16    | 159.1152955 |
| BCL2L2-PABPN1 | NM_001199864 | 121.060491  | 7.09579197  | 2.63E-10    | 17.06088502 |
| SH2D4A        | NM_001174160 | 91.95881691 | 1.143862099 | 2.70E-09    | 80.39327205 |
| CTPS2         | NM_175859    | 80.79536822 | 0.582244881 | 2.38E-09    | 138.7652701 |
| MAP3K8        | NM_005204    | 140.5302455 | 0.954147449 | 1.14E-17    | 147.283573  |
| ARAP1         | NM_001040118 | 55.08108251 | 1.975988852 | 4.08E-05    | 27.87519901 |
| CHKA          | NM_212469    | 57.14285714 | 1.776188915 | 1.97E-05    | 32.17161004 |
| FICD          | NM_007076    | 109.1016741 | 13.53855919 | 2.43E-07    | 8.058588251 |
| RNF103        | NM_001198951 | 157.9382254 | 2.331211945 | 2.27E-17    | 67.74940635 |
| MARS2         | NM_138395    | 143.6525111 | 12.18544585 | 8.39E-11    | 11.78885966 |
| KAT6A         | NM_001099413 | 54.28571429 | 0.537204211 | 2.44E-06    | 101.0522874 |
| ZNF600        | NM_198457    | 74.55083703 | 0.939366835 | 9.97E-09    | 79.36285831 |
| MAP3K14-AS1   | NR_110326    | 121.3256137 | 6.370106764 | 2.41E-10    | 19.04608795 |
| RAD51D        | NR_037711    | 78.46847084 | 0.961351763 | 3.41E-09    | 81.6230581  |
| CKAP5         | NM_001008938 | 75.87645073 | 1.581780702 | 1.91E-07    | 47.96900774 |
| NDUFV3        | NM_001001503 | 147.8352676 | 5.022489635 | 3.84E-14    | 29.43465858 |
| LOC100506990  | NR_040092    | 29.10167405 | 0.82123999  | 0.002430732 | 35.43626029 |
| BSDC1         | NM_001300958 | 91.69369417 | 1.781758795 | 7.97E-10    | 51.46246194 |
| ZNF646        | NM_014699    | 132.2239396 | 6.616140799 | 7.77E-12    | 19.98505529 |
| SOD2          | NM_001024465 | 138.2033481 | 4.314658678 | 2.61E-13    | 32.03111959 |
| NUDT12        | NM_001300741 | 109.6319195 | 0.633919664 | 2.70E-15    | 172.9429229 |

|            |              |             |             |             |             |
|------------|--------------|-------------|-------------|-------------|-------------|
| RPSA       | NM_002295    | 164.1827566 | 16.55128566 | 3.21E-11    | 9.91963766  |
| RDH11      | NM_001252650 | 143.9176338 | 4.563743805 | 2.40E-14    | 31.53499407 |
| RASGRP3    | NM_001139488 | 24.4478793  | 1.196612077 | 0.004928917 | 20.43091473 |
| PLIN3      | NM_001164189 | 48.57142857 | 7.914843521 | 0.003199155 | 6.136751591 |
| AK3        | NM_016282    | 151.9588169 | 2.327329161 | 8.75E-17    | 65.29322086 |
| MINA       | NM_153182    | 149.6319195 | 2.482097637 | 2.22E-16    | 60.28446154 |
| CCDC74A    | NM_138770    | 64.4478793  | 0.833156659 | 3.34E-08    | 77.35385492 |
| MBD3       | NM_001281453 | 62.85714286 | 11.3449064  | 0.0005635   | 5.540560726 |
| CYP4V2     | NM_207352    | 124.713002  | 3.683110123 | 2.04E-12    | 33.86078555 |
| LATS1      | NM_004690    | 126.7747767 | 1.536066105 | 2.75E-13    | 82.53210993 |
| SLC25A44   | NR_104408    | 46.77477667 | 2.697948946 | 0.000182088 | 17.33716153 |
| ABCD4      | NM_005050    | 78.99871632 | 4.787187762 | 3.51E-07    | 16.50211361 |
| TEX22      | NM_001195082 | 103.6525111 | 12.7868873  | 5.37E-07    | 8.106156618 |
| SAFB       | NM_002967    | 104.1827566 | 2.690770815 | 2.16E-10    | 38.71855454 |
| PAN2       | NM_001166279 | 58.46847084 | 3.037626218 | 9.86E-06    | 19.24807947 |
| FAM161A    | NM_032180    | 109.3667968 | 1.913689892 | 6.61E-12    | 57.14969665 |
| UBL7       | NM_201265    | 144.1827566 | 2.74215804  | 8.60E-16    | 52.58003166 |
| ADII       | NM_018269    | 118.7335936 | 2.639692213 | 2.96E-12    | 44.98009011 |
| EZR        | NM_001111077 | 123.1222656 | 14.03645864 | 2.18E-08    | 8.77160463  |
| UBL4A      | NM_014235    | 40.26512274 | 5.08280714  | 0.004129037 | 7.921827767 |
| HERC4      | NM_022079    | 84.4478793  | 0.778668136 | 1.10E-09    | 108.4516951 |
| CDC6       | NM_001254    | 76.40669621 | 1.327426738 | 3.98E-09    | 57.56000993 |
| AGRN       | NM_198576    | 78.2033481  | 2.3068191   | 9.09E-08    | 33.90094529 |
| RPP25L     | NM_148179    | 187.0398994 | 27.61315758 | 1.61E-09    | 6.773578824 |
| SNX1       | NM_003099    | 65.97940845 | 2.027638331 | 2.04E-06    | 32.54002819 |
| RAPGEF6    | NM_016340    | 138.4684708 | 0.35976421  | 2.65E-16    | 384.8867318 |
| NUSAP1     | NM_001243144 | 52.22393965 | 1.475626543 | 5.61E-05    | 35.39102755 |
| PAK4       | NM_005884    | 109.3667968 | 0.648148687 | 6.37E-14    | 168.7372033 |
| ERVMER34-1 | NM_001242690 | 147.0398994 | 4.476753109 | 1.20E-14    | 32.84521077 |
| ZNF711     | NM_021998    | 27.30502215 | 0.149680655 | 0.000250304 | 182.4218517 |
| ZCWPW1     | NM_017984    | 139.5289618 | 1.267704928 | 6.40E-17    | 110.0642261 |
| RPS6KA5    | NM_004755    | 84.4478793  | 0.050031685 | 6.53E-13    | 1687.887959 |
| PSMG4      | NM_001128592 | 132.2239396 | 7.101604802 | 1.06E-11    | 18.61888169 |
| MFGE8      | NM_001114614 | 161.5907364 | 8.353708396 | 3.10E-14    | 19.34359314 |
| ACBD3      | NM_022735    | 110.162165  | 0.555287144 | 8.55E-14    | 198.3877464 |
| NTHL1      | NM_002528    | 56.14157347 | 6.00399332  | 0.000231852 | 9.350705517 |
| CDCA7L     | NM_001127371 | 227.8352676 | 1.810243488 | 2.29E-26    | 125.8589075 |
| FOXM1      | NM_001243088 | 34.81595977 | 1.79593061  | 0.002576274 | 19.38602726 |
| EP300      | NM_001429    | 81.06049096 | 1.400781984 | 7.23E-08    | 57.86802794 |
| RNF216     | NM_207116    | 70.16216501 | 1.634640211 | 1.01E-06    | 42.92208435 |
| TMEM184A   | NM_001097620 | 93.01930787 | 8.537651112 | 5.02E-07    | 10.89518729 |
| TIFA       | NM_052864    | 135.611328  | 3.046287602 | 2.32E-14    | 44.51691557 |
| VPS26A     | NM_001035260 | 86.24453119 | 1.531745288 | 8.00E-09    | 56.30474717 |
| PRPSAP1    | NM_002766    | 97.7323099  | 1.54912068  | 2.89E-10    | 63.08889368 |
| DNM2       | NM_004945    | 112.7541851 | 3.316501476 | 1.08E-10    | 33.99793003 |
| PPM1B      | NM_002706    | 131.4285714 | 1.481930765 | 5.83E-14    | 88.68738981 |
| RWDD3      | NR_103484    | 151.6936942 | 0.86633396  | 1.44E-20    | 175.0984046 |
| EIF4ENIF1  | NM_019843    | 41.3256137  | 2.199316469 | 0.00109141  | 18.79020791 |
| RPAP3      | NM_001146076 | 129.8970423 | 0.267996344 | 2.66E-19    | 484.6970687 |
| FAM219A    | NM_001184943 | 52.48906239 | 0.684876294 | 3.23E-06    | 76.64020915 |
| IRS2       | NM_003749    | 34.28571429 | 2.159858038 | 0.003555657 | 15.87405917 |
| KDELR1     | NM_006801    | 114.550837  | 4.549847623 | 3.57E-11    | 25.1768513  |
| ATF7IP2    | NR_045816    | 73.54955335 | 0.040044558 | 3.61E-12    | 1836.692869 |
| SH3TC2     | NM_024577    | 47.03989941 | 0.988711715 | 2.76E-05    | 47.57696171 |
| HIST1H2BK  | NM_080593    | 57.93822536 | 1.609197634 | 9.01E-07    | 36.00441868 |
| JMJD4      | NM_023007    | 221.5907364 | 18.23715769 | 1.79E-16    | 12.15050833 |
| ZWINT      | NM_001005413 | 63.65251108 | 1.332876481 | 9.58E-08    | 47.75574632 |
| CYP20A1    | NM_177538    | 36.67181894 | 3.413889727 | 0.002421489 | 10.74194596 |
| NARF       | NM_012336    | 112.2831469 | 0.620792685 | 2.69E-14    | 180.8706025 |
| CDKN2AIPNL | NM_080656    | 126.7747767 | 6.309707135 | 4.13E-11    | 20.09202233 |
| EIF3K      | NM_001300992 | 55.87645073 | 5.36493492  | 9.73E-05    | 10.41512182 |
| MSH4       | NM_002440    | 80.79536822 | 0.178789095 | 1.07E-10    | 451.9032231 |
| SH3RF1     | NM_020870    | 90.42728775 | 1.795123697 | 1.03E-08    | 50.37384773 |
| VAX2       | NM_012476    | 115.3462052 | 1.889693772 | 1.91E-12    | 61.03962821 |

|              |              |             |             |             |             |
|--------------|--------------|-------------|-------------|-------------|-------------|
| DEPDC5       | NM_001242897 | 101.5907364 | 1.721916647 | 5.99E-10    | 58.99863773 |
| PRODH        | NM_001195226 | 78.73359358 | 2.859130243 | 3.11E-08    | 27.53760301 |
| DDX31        | NM_022779    | 106.7747767 | 2.560841176 | 2.16E-10    | 41.69519675 |
| LOC730101    | NR_024403    | 113.5495533 | 4.881500653 | 1.16E-10    | 23.26119802 |
| ACADVL       | NM_001033859 | 111.9588169 | 27.21454167 | 4.50E-05    | 4.113933583 |
| SWI5         | NM_001040011 | 127.3050222 | 7.022547015 | 6.66E-11    | 18.12804128 |
| MCU          | NM_001270679 | 104.1827566 | 0.754982447 | 1.74E-11    | 137.9936142 |
| LOC102723354 | NR_110546    | 69.63191953 | 2.687181133 | 2.04E-07    | 25.91262594 |
| DHCR24       | NM_014762    | 135.3462052 | 2.367434806 | 2.31E-14    | 57.169982   |
| TRIM36       | NM_001300759 | 169.6319195 | 0.866131101 | 1.29E-20    | 195.8501655 |
| IFT74        | NM_001099223 | 101.5907364 | 0.526276486 | 2.51E-12    | 193.0368147 |
| LOC158960    | NR_103768    | 28.83655131 | 1.136197784 | 0.002055408 | 25.37986935 |
| TMCC1-AS1    | NR_037893    | 50.42728775 | 1.998166953 | 2.22E-05    | 25.23677397 |
| TPI1         | NM_001159287 | 149.1016741 | 35.56492279 | 2.50E-06    | 4.192380086 |
| LRP11        | NM_032832    | 164.4478793 | 2.180756714 | 6.19E-18    | 75.40863143 |
| PTPN13       | NM_080684    | 170.9575332 | 0.679455154 | 2.89E-19    | 251.609738  |
| MAD2L2       | NM_006341    | 94.81595977 | 9.022733118 | 6.33E-07    | 10.50856304 |
| TARS         | NR_047678    | 36.93694168 | 1.714361266 | 0.001495598 | 21.54559976 |
| NSUN2        | NM_001193455 | 94.28571429 | 2.547781894 | 1.07E-09    | 37.00698027 |
| DUSP10       | NR_111940    | 52.22393965 | 0.750054741 | 2.14E-06    | 69.6268376  |
| TMEM219      | NM_194280    | 100.7953682 | 2.962505432 | 1.40E-10    | 34.0236906  |
| ZMYM6NB      | NM_001195156 | 132.7541851 | 9.032806395 | 8.97E-11    | 14.69689256 |
| MTMR14       | NM_001077526 | 80.79536822 | 0.916898616 | 1.62E-08    | 88.11810467 |
| F11R         | NM_016946    | 45.24324752 | 4.045686008 | 0.001349562 | 11.18308426 |
| IKBKB        | NR_040009    | 63.38738834 | 1.315561422 | 3.48E-06    | 48.18276615 |
| TBC1D31      | NM_145647    | 154.6100443 | 0.512537031 | 6.36E-20    | 301.6563391 |
| TOPORS       | NM_001195622 | 104.1827566 | 1.388508664 | 3.00E-13    | 75.03212568 |
| ZWILCH       | NM_001287823 | 83.1222656  | 1.481939965 | 1.35E-08    | 56.0901707  |
| PTPLAD1      | NM_016395    | 115.3462052 | 1.73291893  | 4.42E-12    | 66.56180116 |
| PARK7        | NM_007262    | 146.7747767 | 1.783730139 | 2.85E-17    | 82.28530397 |
| TIMM23       | NM_006327    | 81.3256137  | 3.801916329 | 5.33E-07    | 21.39069003 |
| PPP1R35      | NM_145030    | 115.611328  | 22.8279343  | 8.15E-05    | 5.064467351 |
| LOC100996437 | NR_110037    | 152.2239396 | 3.302188197 | 1.62E-16    | 46.0978995  |
| MAPK8IP3     | NM_001040439 | 109.1016741 | 2.406593862 | 7.59E-11    | 45.33447699 |
| HSPB8        | NM_014365    | 43.38738834 | 1.213709379 | 0.000148446 | 35.74775731 |
| PPFIBP1      | NM_177444    | 135.3462052 | 1.792807897 | 3.99E-13    | 75.49398095 |
| LINC00933    | NR_038274    | 46.77477667 | 0.805270418 | 1.21E-05    | 58.08580026 |
| PTP4A1       | NM_003463    | 67.03989941 | 15.06995802 | 0.002385317 | 4.448579043 |
| ASB3         | NM_016115    | 112.2239396 | 1.156966412 | 2.94E-11    | 96.9984422  |
| TM2D2        | NM_001024380 | 121.3256137 | 5.897294058 | 6.46E-11    | 20.57309887 |
| LOC100506127 | NM_001282456 | 124.713002  | 2.117897424 | 4.87E-14    | 58.88528908 |
| RPS20        | NM_001146227 | 172.7541851 | 19.67407676 | 4.23E-11    | 8.780802637 |
| H1FX-AS1     | NR_026991    | 132.4890624 | 1.68353111  | 5.72E-17    | 78.6971275  |
| SPTLC1       | NM_006415    | 97.93822536 | 1.873894821 | 1.36E-09    | 52.26452642 |
| KCNK1        | NM_002245    | 51.69369417 | 0.648871038 | 2.95E-06    | 79.66713132 |
| RBMX         | NM_001164803 | 157.9382254 | 6.598864485 | 1.92E-14    | 23.93415196 |
| DHRS12       | NM_001031719 | 152.7541851 | 4.377152249 | 1.51E-14    | 34.89807446 |
| LINC00511    | NR_033876    | 44.4478793  | 2.909184329 | 0.000298997 | 15.27846787 |
| RUFY1        | NM_025158    | 157.4079799 | 4.630356989 | 1.71E-14    | 33.99478274 |
| APOO         | NR_026545    | 57.14285714 | 0.489632221 | 5.15E-07    | 116.7056716 |
| DHX35        | NM_001190809 | 69.89704227 | 1.32091415  | 1.05E-06    | 52.91565865 |
| NSUN4        | NR_045790    | 77.93822536 | 4.647336345 | 1.03E-06    | 16.77051532 |
| CSPP1        | NM_024790    | 135.8764507 | 1.031942213 | 1.89E-15    | 131.6706004 |
| NME1         | NM_000269    | 233.5495533 | 7.891918126 | 1.44E-22    | 29.59350941 |
| LEO1         | NM_001286430 | 109.1016741 | 2.518304741 | 2.22E-11    | 43.32345974 |
| RNF8         | NM_183078    | 131.9588169 | 0.806707682 | 7.36E-16    | 163.5769931 |
| LOC101928580 | NR_120556    | 49.36679679 | 1.602255715 | 3.19E-05    | 30.81081023 |
| EFTUD1       | NM_001040610 | 107.0398994 | 0.195376354 | 4.61E-14    | 547.8651712 |
| EXOC1        | NM_001024924 | 84.4478793  | 0.818720217 | 1.38E-10    | 103.1462    |
| METTTL7B     | NM_152637    | 58.73359358 | 12.68529944 | 0.002515788 | 4.630051807 |
| CCDC43       | NM_144609    | 106.5096539 | 1.954269864 | 7.82E-12    | 54.50099595 |
| AGAP2        | NM_014770    | 75.34620525 | 7.889346362 | 1.20E-05    | 9.550373603 |
| C1orf43      | NM_001098616 | 66.50965393 | 5.005304574 | 9.55E-06    | 13.28783353 |
| SMARCAD1     | NM_001128429 | 91.95881691 | 0.761736994 | 7.22E-11    | 120.7225297 |



|           |              |             |             |             |             |
|-----------|--------------|-------------|-------------|-------------|-------------|
| KAT2A     | NM_021078    | 71.95881691 | 3.178586181 | 3.65E-07    | 22.63862384 |
| ANO10     | NM_018075    | 94.28571429 | 0.136102075 | 5.76E-12    | 692.7573618 |
| C11orf65  | NM_152587    | 84.18275656 | 0.26433252  | 4.79E-11    | 318.4729467 |
| TERF1     | NM_017489    | 144.1827566 | 0.294528483 | 2.09E-20    | 489.537565  |
| TMEM161B  | NM_001289008 | 93.28443061 | 0.589633223 | 1.11E-11    | 158.2075552 |
| ARPC1B    | NM_005720    | 166.7747767 | 10.75964086 | 5.00E-13    | 15.50003192 |
| FAM160A2  | NM_032127    | 81.85585918 | 1.77318806  | 4.99E-09    | 46.16310081 |
| DPYSL5    | NM_001253723 | 69.36679679 | 0.012378637 | 1.99E-12    | 5603.750924 |
| ELP5      | NM_203413    | 90.95753323 | 20.34566021 | 0.00012875  | 4.470611044 |
| TBCC      | NM_003192    | 109.3667968 | 11.60760982 | 6.07E-07    | 9.42199113  |
| FAM86B1   | NR_003494    | 89.10167405 | 2.780093483 | 4.76E-09    | 32.04988415 |
| XBP1      | NM_005080    | 183.3873883 | 12.91196839 | 1.99E-14    | 14.20289942 |
| IL27RA    | NM_004843    | 89.89704227 | 1.690405471 | 5.92E-10    | 53.18075681 |
| FKBP9     | NM_007270    | 165.5083703 | 2.394242211 | 1.31E-17    | 69.12766366 |
| PRPF6     | NM_012469    | 59.26383906 | 0.904630349 | 3.34E-07    | 65.51166358 |
| EIF5      | NM_001969    | 115.0810825 | 15.59477947 | 5.34E-07    | 7.379462    |
| FECH      | NM_000140    | 92.22393965 | 0.784532485 | 2.08E-10    | 117.5527354 |
| ZBTB37    | NM_001122770 | 86.77477667 | 1.444920277 | 5.74E-10    | 60.05506192 |
| POLDIP2   | NM_001290145 | 115.611328  | 7.215070491 | 1.77E-09    | 16.02358953 |
| CCNI      | NM_006835    | 55.87645073 | 4.282930084 | 0.00011137  | 13.046314   |
| NOTCH1    | NM_017617    | 35.08108251 | 1.593920074 | 0.003718699 | 22.00931093 |
| PPP1R21   | NM_001135629 | 143.6525111 | 0.997971012 | 1.09E-15    | 143.9445729 |
| FAM110A   | NM_001289147 | 86.50965393 | 11.86760924 | 1.61E-05    | 7.289560364 |
| ORC6      | NR_037620    | 101.060491  | 3.174163246 | 7.54E-11    | 31.83846675 |
| ZKSCAN3   | NM_001242895 | 81.3256137  | 3.705083076 | 2.67E-07    | 21.94974095 |
| FASTKD3   | NR_036553    | 72.48906239 | 1.156085553 | 4.41E-09    | 62.7021609  |
| ZNF451    | NM_001257273 | 107.0398994 | 4.374784505 | 4.89E-10    | 24.46746789 |
| LOC643770 | NR_038383    | 71.69369417 | 2.520333598 | 1.60E-07    | 28.44611294 |
| FAM45A    | NM_207009    | 269.6319195 | 1.779655409 | 8.12E-32    | 151.5079369 |
| ZDBF2     | NM_001285549 | 35.08108251 | 0.589672514 | 0.000257125 | 59.49248386 |
| ATXN7L1   | NM_020725    | 106.5096539 | 1.08298773  | 2.01E-11    | 98.34797849 |
| KIZ       | NM_001163022 | 106.7747767 | 0.442598724 | 7.03E-13    | 241.2451074 |
| SAC3D1    | NM_013299    | 86.77477667 | 20.96856988 | 0.000490229 | 4.138325941 |
| GMPR      | NM_006877    | 57.93822536 | 1.628488204 | 1.64E-05    | 35.57792143 |
| RBM23     | NM_018107    | 105.7142857 | 3.402258617 | 2.20E-10    | 31.07179601 |
| KIAA0226  | NM_014687    | 92.75418513 | 0.628638339 | 2.29E-11    | 147.54777   |
| MPV17L2   | NM_032683    | 76.14157347 | 17.36213112 | 0.000775655 | 4.385496972 |
| EDRF1     | NR_110859    | 90.16216501 | 1.444639088 | 1.25E-09    | 62.41155025 |
| DNA2      | NR_102264    | 30.16216501 | 0.987893537 | 0.000989936 | 30.53179709 |
| TCTN1     | NM_024549    | 120.7953682 | 0.37601811  | 2.46E-16    | 321.2488044 |
| FASN      | NM_004104    | 215.8764507 | 5.459484636 | 1.15E-21    | 39.54154378 |
| GNE       | NM_005476    | 75.87645073 | 2.211704506 | 1.13E-07    | 34.30677584 |
| PRRG1     | NM_000950    | 100         | 0.233371919 | 2.60E-13    | 428.5005679 |
| ZNF322    | NM_001242798 | 114.0797988 | 1.311516844 | 1.70E-13    | 86.98309848 |
| CEP70     | NM_001288966 | 118.7335936 | 0.149149123 | 1.46E-17    | 796.073023  |
| ARFIP1    | NM_001025593 | 75.87645073 | 0.691964245 | 7.47E-09    | 109.6537159 |
| UGP2      | NM_001001521 | 86.50965393 | 2.615440775 | 1.89E-08    | 33.07651038 |
| ASB6      | NM_001202403 | 78.2033481  | 18.85766236 | 0.00158932  | 4.147033    |
| RFX2      | NM_000635    | 63.38738834 | 0.958913442 | 4.03E-07    | 66.10334735 |
| TFEB      | NM_007162    | 51.95881691 | 2.588703953 | 7.99E-05    | 20.07136306 |
| TSGA10    | NM_025244    | 89.63191953 | 1.76671018  | 1.86E-08    | 50.73379922 |
| FITM2     | NM_001080472 | 87.03989941 | 4.312101406 | 7.89E-08    | 20.18503074 |
| CEBPA     | NM_004364    | 226.2445312 | 19.14085959 | 6.72E-16    | 11.81997758 |
| KLF5      | NM_001730    | 85.97940845 | 6.09121456  | 7.22E-07    | 14.11531438 |
| SMGT1     | NM_033318    | 126.7747767 | 5.105526864 | 3.38E-12    | 24.83089014 |
| ABHD6     | NM_020676    | 106.5096539 | 1.418356432 | 4.36E-11    | 75.09371516 |
| TEX264    | NR_103463    | 93.28443061 | 2.460655218 | 9.25E-10    | 37.91040286 |
| FOXRED2   | NM_001102371 | 118.4684708 | 0.27185714  | 6.94E-18    | 435.7747267 |
| PYGO2     | NM_138300    | 155.611328  | 9.876754889 | 6.45E-13    | 15.75530928 |
| ZFAND1    | NR_033193    | 167.0398994 | 1.91963098  | 4.27E-19    | 87.01667205 |
| CDNF      | NM_001029954 | 140.2651227 | 1.566754328 | 2.18E-17    | 89.52592009 |
| SPNS1     | NM_001142448 | 60.79536822 | 0.993722575 | 1.40E-07    | 61.17941742 |
| C10orf88  | NM_024942    | 100.7953682 | 1.088344293 | 5.19E-12    | 92.6134945  |
| ILVBL     | NM_006844    | 67.30502215 | 3.238366481 | 1.59E-06    | 20.78363352 |

|             |              |             |             |             |             |
|-------------|--------------|-------------|-------------|-------------|-------------|
| BCAS2       | NM_005872    | 116.4066962 | 0.383786686 | 6.94E-18    | 303.3109287 |
| UBE2K       | NM_001111112 | 152.7541851 | 2.505937034 | 3.24E-15    | 60.95691274 |
| NSUN5       | NM_001168347 | 49.36679679 | 3.244049774 | 0.000174979 | 15.21764468 |
| BCKDK       | NM_001271926 | 97.67310262 | 15.01329992 | 4.74E-06    | 6.505771756 |
| LUC7L3      | NM_006107    | 193.8146761 | 4.152303986 | 1.73E-19    | 46.6764179  |
| UPK3A       | NM_006953    | 64.18275656 | 3.149283418 | 7.26E-06    | 20.38011447 |
| SMAD5       | NM_005903    | 177.6731026 | 0.663486577 | 2.25E-22    | 267.7870343 |
| RPS13       | NM_001017    | 112.7541851 | 8.414253672 | 9.64E-09    | 13.40037863 |
| MRE11A      | NM_005590    | 49.89704227 | 0.93867659  | 1.21E-05    | 53.15679841 |
| FAM154B     | NM_001008226 | 52.75418513 | 1.778387604 | 3.21E-05    | 29.66405356 |
| RTF1        | NM_015138    | 175.0810825 | 2.543805345 | 5.10E-18    | 68.82644652 |
| TOR1AIP2    | NM_022347    | 98.46847084 | 1.959739257 | 4.80E-11    | 50.24570004 |
| PXYLP1      | NM_152282    | 100.2651227 | 1.669548735 | 3.49E-10    | 60.0552237  |
| LNPEP       | NM_005575    | 102.6512274 | 0.847379793 | 5.01E-12    | 121.1395743 |
| ISCA2       | NM_001272007 | 120.7953682 | 6.892941383 | 1.51E-09    | 17.52450246 |
| IP6K1       | NM_153273    | 69.89704227 | 0.345295468 | 4.75E-09    | 202.4267582 |
| FUT11       | NM_173540    | 141.060491  | 20.30318388 | 3.98E-08    | 6.947702969 |
| ELFN1-AS1   | NR_120510    | 111.6936942 | 3.547366046 | 2.01E-11    | 31.48637404 |
| ACP6        | NM_016361    | 149.1016741 | 1.858503795 | 1.34E-17    | 80.22672562 |
| UHRF1BP1    | NM_017754    | 175.0810825 | 0.872193524 | 1.25E-19    | 200.7365083 |
| ADAMTSL4    | NM_025008    | 45.97940845 | 4.659105457 | 0.000810875 | 9.868720268 |
| HGH1        | NM_016458    | 347.3050222 | 48.57145529 | 1.12E-18    | 7.150393581 |
| FAM134C     | NM_178126    | 130.162165  | 1.613739816 | 4.64E-15    | 80.65870576 |
| OGFR        | NM_007346    | 54.55083703 | 8.968914915 | 0.002154517 | 6.082211454 |
| ARHGEF10L   | NM_018125    | 40.79536822 | 0.872563604 | 0.000148978 | 46.75346078 |
| PHACTR2     | NM_001100164 | 115.3462052 | 0.780366069 | 5.85E-13    | 147.8103801 |
| MRPL35      | NM_016622    | 55.87645073 | 2.189718147 | 4.57E-06    | 25.51764518 |
| LEPROTL1    | NM_015344    | 86.77477667 | 1.053104696 | 5.08E-11    | 82.39900267 |
| RAB24       | NR_109790    | 61.3256137  | 8.457039772 | 0.0004102   | 7.251427846 |
| MTPN        | NM_145808    | 109.6319195 | 0.915220003 | 3.63E-12    | 119.7875037 |
| PITPNM1     | NM_004910    | 131.9588169 | 5.057886025 | 1.97E-12    | 26.08971737 |
| BPNT1       | NM_001286150 | 83.91763382 | 1.172091114 | 4.13E-09    | 71.59651054 |
| ZNF589      | NM_016089    | 150.162165  | 1.562379722 | 8.01E-18    | 96.11118405 |
| ST7         | NM_018412    | 38.99871632 | 0.795947275 | 0.000166358 | 48.9966076  |
| NAE1        | NM_001286500 | 149.6319195 | 2.006108975 | 5.57E-17    | 74.58813126 |
| GATS        | NM_178831    | 38.2033481  | 2.049030981 | 0.002249652 | 18.64459271 |
| PAICS       | NM_001079525 | 95.87645073 | 4.473976761 | 7.47E-09    | 21.42980526 |
| RAB4B-EGLN2 | NR_037791    | 78.46847084 | 5.548211044 | 1.42E-06    | 14.143022   |
| HEBP1       | NM_015987    | 112.4890624 | 2.606968106 | 5.19E-12    | 43.1493819  |
| UBE2J2      | NM_194315    | 49.36679679 | 5.384125725 | 0.000724327 | 9.168953199 |
| UBE2A       | NM_003336    | 78.2033481  | 3.416561766 | 1.33E-07    | 22.88948758 |
| NIT2        | NM_020202    | 123.9176338 | 3.573540323 | 3.46E-12    | 34.67643362 |
| DUSP4       | NM_001394    | 169.1016741 | 11.33038037 | 2.13E-13    | 14.92462464 |
| C12orf49    | NM_024738    | 155.8764507 | 0.189894493 | 2.71E-25    | 820.8581964 |
| BTAF1       | NM_003972    | 75.34620525 | 0.802813035 | 1.46E-08    | 93.85274273 |
| U2AF2       | NM_007279    | 130.162165  | 7.588563735 | 2.13E-11    | 17.15241112 |
| TSC22D1     | NM_006022    | 136.1415735 | 28.91488006 | 1.98E-06    | 4.708356846 |
| KNOP1       | NM_001012991 | 89.63191953 | 4.711702825 | 1.07E-07    | 19.02325398 |
| PLBD2       | NM_001159727 | 136.1415735 | 1.17547192  | 1.84E-16    | 115.8186522 |
| HIRIP3      | NM_003609    | 98.2033481  | 24.14310914 | 0.000342054 | 4.067551843 |
| PCYOX1L     | NM_001301054 | 123.6525111 | 8.345816045 | 3.48E-10    | 14.8161079  |
| TRAPPC3     | NR_073097    | 136.9369417 | 3.611015225 | 8.13E-14    | 37.92200618 |
| SLC35C2     | NM_001281460 | 131.4285714 | 4.331716054 | 1.56E-12    | 30.34099414 |
| SMIM11      | NM_058182    | 78.99871632 | 3.021444762 | 9.19E-08    | 26.14600714 |
| USP39       | NM_001256726 | 113.0193079 | 1.746230316 | 1.44E-12    | 64.72187936 |
| LINC00910   | NR_027412    | 155.7606562 | 4.633351227 | 5.08E-15    | 33.61727799 |
| PXK         | NM_001289100 | 51.42857143 | 0.928461927 | 6.47E-06    | 55.39114738 |
| ELF2        | NM_001276458 | 111.9588169 | 3.47360798  | 1.32E-10    | 32.23127582 |
| FNDC3B      | NM_022763    | 110.4272878 | 1.072418214 | 6.42E-12    | 102.9703583 |
| TUBB3       | NM_006086    | 281.3256137 | 6.622394817 | 2.32E-28    | 42.48094858 |
| NFE2        | NM_001136023 | 43.91763382 | 1.090791883 | 4.96E-05    | 40.26215677 |
| SREK1       | NM_139168    | 34.81595977 | 0.021516721 | 5.15E-06    | 1618.088571 |
| RBMS1       | NM_002897    | 52.48906239 | 1.024237306 | 1.02E-05    | 51.24697382 |
| ABCA2       | NM_001606    | 54.28571429 | 1.161961528 | 7.28E-06    | 46.71902898 |

|                       |              |             |             |             |             |
|-----------------------|--------------|-------------|-------------|-------------|-------------|
| TUBGCP2               | NM_001256618 | 95.08108251 | 0.182202208 | 5.00E-15    | 521.8437452 |
| IQGAP1                | NM_003870    | 94.55083703 | 0.964646132 | 1.02E-10    | 98.01608473 |
| APBA3                 | NM_004886    | 127.3050222 | 3.737015886 | 5.34E-13    | 34.06595692 |
| ARRDC3                | NM_020801    | 96.40669621 | 9.914507702 | 3.27E-07    | 9.723800627 |
| ZFX                   | NM_001178085 | 31.42857143 | 0.197128257 | 0.000358374 | 159.4320973 |
| ABHD12                | NM_001042472 | 69.89704227 | 1.768150885 | 1.51E-06    | 39.5311525  |
| WDR4                  | NR_048535    | 112.7541851 | 4.111068461 | 2.51E-10    | 27.42697822 |
| ZNF107                | NM_001013746 | 83.1222656  | 0.676589048 | 1.41E-10    | 122.8548789 |
| MTRF1L                | NM_001114184 | 101.3256137 | 5.591800005 | 1.46E-08    | 18.12039301 |
| PMS1                  | NR_110332    | 224.1827566 | 0.870873642 | 1.23E-25    | 257.422829  |
| SLC35D2               | NR_104627    | 32.22393965 | 1.21117688  | 0.00112734  | 26.60547784 |
| PRDM11                | NM_001256696 | 142.1209819 | 1.816112314 | 1.02E-14    | 78.25561273 |
| NIT1                  | NM_001185093 | 94.81595977 | 14.26680785 | 1.12E-05    | 6.64591272  |
| PLEKHJ1               | NM_018049    | 69.63191953 | 15.53043    | 0.001390586 | 4.483579625 |
| TCTN3                 | NM_001143973 | 46.30373848 | 2.1952208   | 0.000222794 | 21.09297547 |
| CEP95                 | NM_138363    | 121.8558592 | 5.624039361 | 2.72E-11    | 21.66696414 |
| NBN                   | NM_002485    | 170.4272878 | 0.073860789 | 2.17E-29    | 2307.412231 |
| CXorf40A              | NM_001171907 | 35.34620525 | 0.594644424 | 0.000279437 | 59.44090922 |
| DST                   | NM_001144769 | 67.30502215 | 0.74398659  | 1.86E-07    | 90.46537004 |
| KANSL1-AS1            | NR_034172    | 161.5907364 | 23.02844633 | 1.30E-09    | 7.017005582 |
| BAX                   | NM_001291431 | 89.63191953 | 9.607394698 | 2.99E-06    | 9.329471969 |
| ASHIL                 | NM_018489    | 41.06049096 | 0.837434897 | 0.00016159  | 49.03126335 |
| BARD1                 | NR_104212    | 95.34620525 | 0.297175475 | 1.73E-12    | 320.8414334 |
| FAM127B               | NM_001134321 | 100.2651227 | 15.48552884 | 3.52E-05    | 6.474762584 |
| SOCS2                 | NM_001270467 | 81.06049096 | 17.73356405 | 0.000331249 | 4.571020847 |
| JADE1                 | NM_001287443 | 78.2033481  | 1.903590513 | 1.45E-07    | 41.08202241 |
| PCMT1                 | NM_001252051 | 122.1209819 | 0.791930942 | 6.60E-14    | 154.2066049 |
| GALNT11               | NM_022087    | 154.550837  | 1.386056995 | 4.39E-16    | 111.5039552 |
| UBLCP1                | NM_145049    | 155.611328  | 3.000181451 | 3.75E-16    | 51.86730554 |
| SP2                   | NM_003110    | 84.97812478 | 5.328141872 | 2.00E-07    | 15.94892306 |
| HDHD1                 | NM_001178135 | 54.55083703 | 0.824523057 | 2.71E-06    | 66.16047494 |
| MAPKBP1               | NM_001265611 | 96.93694168 | 2.727991306 | 1.22E-09    | 35.53418277 |
| RACGAP1               | NM_001126104 | 54.81595977 | 2.353156432 | 3.14E-05    | 23.29465182 |
| LOC100499484-C9ORF174 | NR_036529    | 144.1827566 | 0.065055477 | 2.06E-22    | 2216.304673 |
| SACS                  | NM_001278055 | 155.3462052 | 0.812268067 | 1.05E-18    | 191.2499229 |
| AFAP1                 | NM_001134647 | 110.6924105 | 1.885622868 | 9.96E-11    | 58.70336659 |
| DYNLL1                | NM_001037495 | 160.7953682 | 14.89287479 | 2.88E-11    | 10.7967985  |
| LOC102288414          | NR_104414    | 166.2445312 | 9.724924694 | 9.91E-14    | 17.09468571 |
| AMZ2                  | NM_001289056 | 153.5495533 | 10.80278052 | 3.88E-12    | 14.21389179 |
| FKBP3                 | NM_002013    | 147.0398994 | 6.808742535 | 3.80E-13    | 21.59574968 |
| MPP6                  | NM_016447    | 63.38738834 | 0.280677712 | 7.57E-08    | 225.8369142 |
| FASTKD2               | NM_001136193 | 40.79536822 | 1.432953527 | 0.000713179 | 28.46942866 |
| CRBN                  | NM_001173482 | 66.77477667 | 0.294645449 | 1.15E-09    | 226.6275517 |
| PHLDB1                | NM_001144758 | 105.9794085 | 6.753111658 | 2.23E-08    | 15.69341865 |
| CLASP1                | NM_001142273 | 87.30502215 | 0.956475626 | 1.32E-09    | 91.27783273 |
| NDUFS8                | NM_002496    | 81.06049096 | 8.373506889 | 3.65E-06    | 9.680590467 |
| FAM160B2              | NM_022749    | 49.63191953 | 5.641578519 | 0.0006497   | 8.797523488 |
| BLCAP                 | NM_006698    | 129.1016741 | 3.24409194  | 2.19E-13    | 39.79593564 |
| EIF3J-AS1             | NR_034170    | 180.7953682 | 16.03842053 | 2.11E-12    | 11.27264171 |
| KDEL2                 | NM_006854    | 169.1016741 | 5.526950225 | 1.09E-15    | 30.59583806 |
| PLCXD2                | NM_153268    | 129.6319195 | 1.509357938 | 1.25E-12    | 85.88547243 |
| TAF6L                 | NM_006473    | 86.24453119 | 10.52883039 | 4.74E-06    | 8.191273677 |
| C1orf210              | NM_001164829 | 52.48906239 | 1.56259664  | 5.91E-06    | 33.59092234 |
| GOT2                  | NM_002080    | 153.8146761 | 1.620057805 | 2.58E-18    | 94.94394311 |
| RAB1A                 | NM_004161    | 60.53024548 | 2.663011852 | 9.51E-06    | 22.72999478 |
| MRRF                  | NM_138777    | 143.9176338 | 1.692975704 | 3.32E-15    | 85.00868236 |
| MKRN2OS               | NM_001195279 | 37.40797988 | 0.536392627 | 6.63E-05    | 69.73992181 |
| PPOX                  | NM_000309    | 61.06049096 | 7.575606361 | 0.000291136 | 8.06014569  |
| TRMT2A                | NM_022727    | 80.79536822 | 13.97160665 | 8.09E-05    | 5.782825859 |
| TRPC1                 | NM_003304    | 66.50965393 | 1.451822842 | 2.46E-06    | 45.81113618 |
| ATPAF2                | NM_145691    | 57.40797988 | 1.422920682 | 4.57E-06    | 40.34517216 |
| MRPS35                | NM_001190864 | 107.0398994 | 0.330138947 | 3.72E-15    | 324.2268158 |
| PMS2L2                | NR_003614    | 152.7541851 | 0.149448518 | 1.87E-25    | 1022.119105 |
| CENPU                 | NR_104593    | 51.69369417 | 0.307512889 | 4.04E-07    | 168.1025285 |

|               |              |             |             |             |             |
|---------------|--------------|-------------|-------------|-------------|-------------|
| EIF4H         | NM_022170    | 120.2651227 | 2.308603545 | 1.94E-13    | 52.09431607 |
| TMEM194A      | NM_015257    | 78.73359358 | 1.44760248  | 6.68E-09    | 54.38896013 |
| CHMP1B        | NM_020412    | 108.1003904 | 8.485906826 | 1.60E-08    | 12.7388142  |
| ANGEL2        | NM_144567    | 78.46847084 | 3.0417986   | 7.34E-08    | 25.79673449 |
| GCFC2         | NM_003203    | 148.1003904 | 0.930250656 | 1.72E-17    | 159.2048222 |
| ADH5          | NM_000671    | 120.7953682 | 2.247546024 | 7.14E-13    | 53.74544812 |
| UBE2C         | NM_001281742 | 70.69241049 | 8.841678558 | 6.81E-05    | 7.995360839 |
| PGAM5         | NM_001170543 | 75.08108251 | 5.940138196 | 5.94E-06    | 12.63961882 |
| RAI14         | NM_001145522 | 100.7953682 | 0.17309291  | 5.34E-13    | 582.3194508 |
| KANSL1L       | NM_152519    | 60.79536822 | 0.926511999 | 9.81E-07    | 65.61746454 |
| PDCD6IP       | NM_001162429 | 192.4890624 | 0.21751957  | 6.11E-29    | 884.9275585 |
| ARFGAP3       | NM_014570    | 89.63191953 | 2.613679396 | 1.14E-08    | 34.29338719 |
| LAMC2         | NM_018891    | 61.3256137  | 1.554241444 | 7.56E-06    | 39.45694149 |
| STAT3         | NM_139276    | 106.5096539 | 0.708834257 | 7.03E-13    | 150.2603082 |
| LUC7L2        | NM_001270643 | 87.30502215 | 1.643596958 | 6.67E-09    | 53.11826706 |
| MPZL2         | NM_144765    | 67.57014489 | 4.100988984 | 1.25E-06    | 16.47654874 |
| TOM1L1        | NM_005486    | 116.4066962 | 3.438365978 | 1.47E-11    | 33.85523732 |
| ZNF385A       | NM_001130968 | 49.36679679 | 7.619442635 | 0.002981989 | 6.479056167 |
| ARMC8         | NM_001267042 | 107.3050222 | 1.582881563 | 9.28E-11    | 67.79093562 |
| GSN           | NM_001127666 | 135.0810825 | 4.622655461 | 4.22E-12    | 29.22153374 |
| ZNF791        | NM_153358    | 106.5096539 | 2.504973858 | 9.57E-11    | 42.51926765 |
| LOC101927021  | NR_110068    | 153.0193079 | 1.902396836 | 3.22E-19    | 80.43500965 |
| BCS1L         | NM_001257342 | 95.08108251 | 18.03765537 | 7.10E-05    | 5.27125508  |
| ERCC1         | NM_001983    | 124.1827566 | 11.21523915 | 6.46E-09    | 11.07268021 |
| ESRP1         | NM_001034915 | 50.69241049 | 1.922579427 | 7.89E-05    | 26.36687451 |
| TSC22D4       | NM_030935    | 144.1827566 | 6.214627328 | 1.47E-13    | 23.20054751 |
| LCMT1         | NM_016309    | 67.83526763 | 2.062940513 | 1.35E-06    | 32.88280356 |
| EIF4E2        | NM_004846    | 183.3873883 | 4.412666078 | 2.96E-18    | 41.55931699 |
| C10orf32-ASMT | NR_037644    | 102.1209819 | 0.915808085 | 1.57E-11    | 111.5091509 |
| ARG2          | NM_001172    | 54.07979883 | 3.924603336 | 0.000217217 | 13.77968528 |
| MCCC1         | NR_120640    | 35.34620525 | 0.333913471 | 0.000302387 | 105.8543855 |
| TYRO3         | NM_006293    | 57.67310262 | 4.713888906 | 9.73E-05    | 12.23471825 |
| KRR1          | NM_007043    | 54.34492157 | 1.091289084 | 3.08E-06    | 49.79883184 |
| AKR1A1        | NM_006066    | 99.5289618  | 5.897179103 | 2.40E-08    | 16.87738494 |
| DHDDS         | NM_024887    | 89.89704227 | 2.643865424 | 6.48E-09    | 34.00212487 |
| LRRFIP1       | NM_001137552 | 86.24453119 | 2.521889208 | 2.69E-08    | 34.19838228 |
| MTF2          | NM_001164393 | 78.46847084 | 2.144834304 | 1.55E-07    | 36.58486378 |
| GDPGP1        | NM_001013657 | 146.5096539 | 2.91413244  | 9.68E-17    | 50.27556467 |
| THYN1         | NM_014174    | 38.99871632 | 4.656193579 | 0.001941519 | 8.375664728 |
| NDUFAB1       | NM_005003    | 124.1827566 | 4.441519926 | 2.01E-11    | 27.95951805 |
| TMEM169       | NM_001142311 | 64.4478793  | 2.184763988 | 7.87E-07    | 29.49878323 |
| SSR4          | NM_001204527 | 74.81595977 | 7.988048938 | 2.77E-05    | 9.365986656 |
| ASCC1         | NM_001198800 | 113.5495533 | 1.39686372  | 2.10E-11    | 81.2889273  |
| BCLAF1        | NM_001301038 | 110.6924105 | 3.442182566 | 2.08E-10    | 32.15762336 |
| ANXA6         | NM_001155    | 121.3256137 | 2.214381611 | 2.85E-12    | 54.78983979 |
| CD58          | NR_026665    | 113.5495533 | 1.875081133 | 8.30E-12    | 60.55714142 |
| ARMCX5        | NM_001168485 | 57.93822536 | 2.651597245 | 5.52E-06    | 21.85031134 |
| TMX1          | NM_030755    | 146.2445312 | 1.145235079 | 3.22E-19    | 127.6982638 |
| RPL28         | NM_001136136 | 161.5907364 | 33.35229225 | 2.58E-06    | 4.844966434 |
| HSCB          | NM_172002    | 123.9176338 | 5.043513082 | 2.99E-11    | 24.56970603 |
| NFKBID        | NM_139239    | 193.2844306 | 9.062132127 | 4.28E-17    | 21.32880297 |
| HNRNPU        | NM_004501    | 144.713002  | 8.057258364 | 1.81E-12    | 17.9605761  |
| ST13          | NM_001278589 | 38.73359358 | 2.488574852 | 0.000975331 | 15.56456843 |
| C1orf174      | NM_207356    | 95.08108251 | 0.374133026 | 2.55E-14    | 254.1371005 |
| CCT6P1        | NR_003110    | 100.2651227 | 5.563927721 | 9.07E-09    | 18.02056529 |
| FAM217B       | NM_001190827 | 201.060491  | 5.295935894 | 1.72E-20    | 37.96505377 |
| PDCD2         | NM_001199461 | 135.611328  | 10.46918556 | 3.75E-10    | 12.95337896 |
| DAPK1         | NM_001288730 | 76.67181894 | 0.051685808 | 3.25E-11    | 1483.421127 |
| IFIT5         | NM_012420    | 73.01930787 | 8.539613893 | 1.69E-05    | 8.550656831 |
| HERPUD1       | NM_001010989 | 184.1827566 | 3.194903436 | 1.75E-20    | 57.64892751 |
| HINFP         | NM_198971    | 77.93822536 | 2.174637472 | 1.13E-08    | 35.83964057 |
| ODF2          | NM_002540    | 66.77477667 | 2.038093588 | 1.95E-06    | 32.76335153 |
| H2AFV         | NM_012412    | 128.6306359 | 0.334511714 | 7.74E-20    | 384.5325307 |
| LOC493754     | NR_111973    | 112.4890624 | 2.968024592 | 4.86E-11    | 37.90031345 |

|           |              |             |             |             |             |
|-----------|--------------|-------------|-------------|-------------|-------------|
| RNF14     | NM_004290    | 63.91763382 | 5.772896028 | 3.09E-05    | 11.07202234 |
| TFRC      | NM_003234    | 141.5907364 | 5.009167075 | 1.76E-13    | 28.26632339 |
| FBXL2     | NM_012157    | 78.99871632 | 0.244263131 | 2.34E-10    | 323.4164567 |
| CSTB      | NM_000100    | 180.5302455 | 15.78483199 | 1.15E-12    | 11.43694438 |
| INTS8     | NR_073445    | 128.6306359 | 2.663742047 | 4.75E-13    | 48.28944905 |
| TOR3A     | NM_022371    | 101.8558592 | 6.075057285 | 6.77E-09    | 16.76623847 |
| EMID1     | NM_001267895 | 57.93822536 | 1.891463779 | 1.75E-05    | 30.63142208 |
| CAPN2     | NM_001748    | 78.2033481  | 6.258061867 | 2.24E-06    | 12.49641659 |
| C16orf13  | NR_109976    | 88.57142857 | 5.006899614 | 1.70E-07    | 17.68987505 |
| SCAMP3    | NM_052837    | 75.34620525 | 6.098567114 | 2.18E-06    | 12.35473905 |
| ATL2      | NR_024191    | 123.1222656 | 0.907804448 | 3.16E-13    | 135.6264181 |
| COA1      | NM_018224    | 107.0398994 | 1.364216719 | 1.07E-10    | 78.46253306 |
| SRP72     | NM_001267722 | 59.26383906 | 2.086133905 | 6.76E-06    | 28.408454   |
| COX18     | NM_001297733 | 163.6525111 | 3.222142827 | 4.53E-18    | 50.78996179 |
| FAM13B    | NM_001101801 | 183.3873883 | 1.847190222 | 6.44E-19    | 99.27910304 |
| ANLN      | NM_001284301 | 115.3462052 | 0.356551168 | 1.47E-15    | 323.5053351 |
| DYNLRB1   | NM_001281728 | 144.4478793 | 2.93070445  | 5.28E-15    | 49.28776741 |
| SNX9      | NM_016224    | 85.97940845 | 0.545723793 | 4.07E-10    | 157.551145  |
| SDF2      | NM_006923    | 103.9176338 | 3.311192696 | 1.89E-10    | 31.383747   |
| RMDN1     | NM_016033    | 152.4890624 | 2.794363289 | 3.42E-16    | 54.57023536 |
| ETV3      | NM_001145312 | 101.3256137 | 1.645944931 | 3.11E-12    | 61.56075565 |
| SLC25A38  | NM_017875    | 110.4272878 | 8.910137899 | 9.61E-09    | 12.39344318 |
| PSME4     | NM_014614    | 69.10167405 | 0.655211496 | 5.32E-08    | 105.464685  |
| OR51B5    | NM_001005567 | 121.3256137 | 7.631473804 | 1.88E-09    | 15.89805807 |
| TRIM21    | NM_003141    | 92.75418513 | 1.636442412 | 1.00E-10    | 56.6803845  |
| LFNG      | NM_001040168 | 45.71428571 | 6.839107877 | 0.00370824  | 6.684246913 |
| DDX39A    | NR_046366    | 89.89704227 | 11.46312312 | 6.95E-06    | 7.842281839 |
| TBCCD1    | NM_018138    | 187.3050222 | 1.614257196 | 1.12E-22    | 116.0317096 |
| REEP1     | NM_001164731 | 65.97940845 | 0.056360844 | 5.49E-10    | 1170.660397 |
| ZAK       | NM_016653    | 62.38610466 | 0.463087251 | 3.28E-07    | 134.7178194 |
| BLOC1S2   | NM_001282439 | 192.4890624 | 4.596696047 | 3.91E-20    | 41.87552547 |
| ZNF823    | NM_001080493 | 98.73359358 | 0.062750917 | 7.35E-17    | 1573.420724 |
| AFMID     | NR_027083    | 127.8352676 | 9.507982424 | 4.42E-10    | 13.44504669 |
| SGMS1     | NM_147156    | 74.07979883 | 0.530255114 | 3.03E-08    | 139.7059584 |
| DAP       | NM_001291963 | 97.93822536 | 2.166770882 | 1.58E-09    | 45.20008377 |
| PPP2R5E   | NM_006246    | 72.75418513 | 0.71669526  | 4.70E-08    | 101.5134175 |
| EPB41     | NM_203343    | 109.8970423 | 0.369218045 | 1.27E-12    | 297.6480802 |
| PSMC2     | NM_001204453 | 69.63191953 | 3.172504203 | 2.69E-06    | 21.94856652 |
| ZNF410    | NM_001242928 | 96.67181894 | 1.101403032 | 1.33E-10    | 87.7715206  |
| PLEKHH1   | NM_020715    | 81.06049096 | 2.178543995 | 7.23E-08    | 37.20856276 |
| PRKCD     | NM_006254    | 40.53024548 | 0.519066767 | 2.98E-05    | 78.08291359 |
| ATP2B4    | NM_001001396 | 89.63191953 | 0.879187922 | 4.20E-10    | 101.9485338 |
| ENAH      | NM_018212    | 80.79536822 | 1.005242733 | 7.09E-09    | 80.37398889 |
| MINOS1    | NR_033758    | 95.34620525 | 0.931769053 | 6.23E-11    | 102.328152  |
| GTSE1-AS1 | NR_024009    | 95.61132799 | 15.79871078 | 0.000102192 | 6.051843681 |
| CAD       | NM_004341    | 138.7335936 | 3.769314076 | 8.57E-14    | 36.80605828 |
| HIBADH    | NM_152740    | 143.9176338 | 0.46763177  | 2.36E-17    | 307.7584608 |
| LAMA5     | NM_005560    | 100.7953682 | 3.907009872 | 9.13E-09    | 25.79859574 |
| IPO8      | NM_006390    | 50.16216501 | 0.695615602 | 3.69E-06    | 72.11190328 |
| SRXN1     | NM_080725    | 83.65251108 | 7.230689208 | 1.72E-06    | 11.56909233 |
| NSA2      | NM_001271665 | 99.26383906 | 6.671500149 | 7.88E-09    | 14.8787884  |
| AGPAT2    | NM_006412    | 195.3462052 | 4.065433183 | 1.20E-20    | 48.05052659 |
| CCP110    | NM_001199022 | 55.34620525 | 0.464635855 | 2.11E-07    | 119.117379  |
| HEATR3    | NM_182922    | 98.46847084 | 0.222112662 | 8.81E-15    | 443.3266881 |
| RNF216P1  | NR_023385    | 121.5907364 | 0.680392925 | 2.67E-16    | 178.7066443 |
| TPT1-AS1  | NR_024458    | 49.89704227 | 3.903062217 | 0.000178833 | 12.78407555 |
| PDHX      | NM_003477    | 106.7747767 | 0.598476937 | 5.02E-13    | 178.410846  |
| RNF122    | NM_024787    | 104.1827566 | 3.074419733 | 4.21E-10    | 33.88696587 |
| LRIG2     | NM_014813    | 144.1827566 | 1.857182985 | 2.87E-15    | 77.63519143 |
| ZBTB8OS   | NM_178547    | 81.3256137  | 0.7850826   | 2.11E-09    | 103.588608  |
| ZDHHC21   | NM_178566    | 43.91763382 | 0.276653596 | 1.97E-05    | 158.7459349 |
| LRPPRC    | NM_133259    | 68.63063585 | 2.140461029 | 1.86E-06    | 32.06348301 |
| ARPC5     | NM_005717    | 83.65251108 | 4.28614597  | 4.12E-08    | 19.51695338 |
| TMCO4     | NM_181719    | 97.93822536 | 0.142990369 | 1.37E-13    | 684.9288235 |

|              |              |             |             |             |             |
|--------------|--------------|-------------|-------------|-------------|-------------|
| C12orf65     | NM_001194995 | 84.18275656 | 3.031758313 | 1.67E-08    | 27.76697476 |
| BFSP1        | NM_001161705 | 50.42728775 | 1.833037325 | 7.65E-05    | 27.5102351  |
| LOC100288181 | NR_038925    | 124.9781248 | 6.7030287   | 9.45E-11    | 18.64502307 |
| WDR55        | NM_017706    | 190.162165  | 6.31321603  | 6.63E-19    | 30.12128273 |
| POLR3C       | NM_006468    | 113.0193079 | 0.91528428  | 5.59E-15    | 123.4800054 |
| DTNBP1       | NM_001271669 | 120.7953682 | 0.89915795  | 1.46E-13    | 134.3427684 |
| DNTTIP1      | NM_052951    | 132.4890624 | 2.958045871 | 1.21E-13    | 44.78938738 |
| NEIL1        | NR_046311    | 61.59073644 | 4.453146172 | 3.60E-05    | 13.83083646 |
| PAX2         | NM_003989    | 38.46847084 | 2.217788724 | 0.002350776 | 17.34541727 |
| SUMF2        | NM_001042469 | 135.611328  | 3.097755548 | 3.01E-14    | 43.77728516 |
| ZDHHC7       | NM_001145548 | 135.0810825 | 2.741927802 | 3.63E-14    | 49.2650034  |
| BCL7C        | NM_004765    | 67.03989941 | 9.806134842 | 0.00015137  | 6.836526368 |
| RRM1         | NM_001033    | 60.53024548 | 1.537478531 | 6.04E-06    | 39.36981511 |
| KCTD20       | NM_001286580 | 95.08108251 | 2.697513898 | 2.16E-09    | 35.24767104 |
| ITGA1        | NM_181501    | 28.10039037 | 0.39878016  | 0.002181038 | 70.46586865 |
| ANAPC13      | NM_015391    | 76.14157347 | 2.233768749 | 2.65E-08    | 34.08659625 |
| SEC23IP      | NR_037771    | 172.7541851 | 2.245966102 | 2.60E-18    | 76.91753894 |
| ZC3H14       | NM_001160103 | 155.0810825 | 1.946162756 | 1.38E-16    | 79.68556692 |
| SBK1         | NM_001024401 | 60          | 2.929105787 | 8.01E-06    | 20.48406728 |
| CCDC82       | NM_024725    | 72.22393965 | 0.357853611 | 4.42E-10    | 201.8253762 |
| FLJ31306     | NR_029435    | 84.71300204 | 2.313262705 | 8.18E-09    | 36.62057139 |
| RCOR3        | NM_001136223 | 120.5302455 | 1.715774623 | 1.50E-12    | 70.24829711 |
| CHCHD7       | NM_024300    | 162.1209819 | 4.102732331 | 1.11E-17    | 39.51536899 |
| PANK1        | NM_148977    | 69.89704227 | 2.462888884 | 1.52E-06    | 28.38010383 |
| RGS9BP       | NM_207391    | 92.75418513 | 1.324080016 | 2.50E-11    | 70.05179747 |
| SNHG12       | NR_024127    | 219.2638391 | 28.24127426 | 5.81E-13    | 7.763949922 |
| HMGCR        | NM_001130996 | 58.2033481  | 1.785052926 | 7.91E-06    | 32.60595092 |
| VDR          | NM_000376    | 229.6319195 | 2.565774824 | 2.51E-24    | 89.49807964 |
| GOSR1        | NM_004871    | 75.08108251 | 0.754409445 | 3.21E-09    | 99.5229885  |
| PTDSS2       | NM_030783    | 69.63191953 | 0.539500696 | 5.36E-09    | 129.0673397 |
| PPP2R4       | NM_001271832 | 132.2239396 | 4.892141146 | 3.80E-12    | 27.027826   |
| CST6         | NM_001323    | 71.95881691 | 10.57260019 | 0.000720794 | 6.806160794 |
| VWA1         | NM_199121    | 100.2651227 | 13.87724492 | 1.59E-06    | 7.22514615  |
| ERCC5        | NM_000123    | 85.97940845 | 0.666776896 | 2.41E-10    | 128.947792  |
| SRPX         | NM_001170750 | 54.81595977 | 0.31964899  | 5.75E-07    | 171.4879805 |
| BLOC1S4      | NM_018366    | 118.4684708 | 12.73562986 | 5.13E-07    | 9.302128918 |
| NOTCH2       | NM_024408    | 213.8146761 | 2.457613428 | 3.33E-21    | 87.00093907 |
| GAMT         | NM_000156    | 167.0398994 | 16.92883045 | 2.41E-11    | 9.867184856 |
| MAX          | NM_001271069 | 43.65251108 | 2.498326349 | 0.000685268 | 17.47270171 |
| ATP5SL       | NM_001167869 | 102.6512274 | 11.03798722 | 1.98E-07    | 9.29981394  |
| RPL31        | NM_000993    | 167.5701449 | 17.26171758 | 8.65E-12    | 9.707617109 |
| ELL2         | NM_012081    | 72.48906239 | 2.284524927 | 8.04E-07    | 31.73047557 |
| SPRYD3       | NM_032840    | 71.42857143 | 5.520363089 | 2.86E-06    | 12.9391075  |
| FOSL1        | NM_001300856 | 75.87645073 | 16.6236841  | 0.000664304 | 4.564358314 |
| MED9         | NM_018019    | 58.46847084 | 2.459358602 | 6.75E-06    | 23.77386966 |
| C17orf89     | NM_001086521 | 70.42728775 | 10.27892503 | 0.000167009 | 6.851619946 |
| UBTF         | NR_045058    | 78.46847084 | 14.39943164 | 0.000340078 | 5.449414451 |
| FBXW11       | NM_012300    | 82.12098192 | 0.696334531 | 1.88E-09    | 117.9332322 |
| C11orf63     | NM_024806    | 32.75418513 | 0.577947247 | 0.000885111 | 56.67331279 |
| PTPN2        | NM_080423    | 166.2445312 | 0.94193618  | 4.64E-18    | 176.4923514 |
| IFT88        | NM_006531    | 98.46847084 | 0.35033261  | 4.68E-12    | 281.0713819 |
| STOM         | NR_073037    | 81.3256137  | 0.684478401 | 1.82E-09    | 118.8139956 |
| SEC24C       | NM_198597    | 74.81595977 | 3.608846797 | 1.75E-06    | 20.73126513 |
| PSMA7        | NM_002792    | 103.1222656 | 10.23729648 | 1.02E-07    | 10.07319323 |
| CARS2        | NM_024537    | 129.6319195 | 2.701166337 | 6.34E-13    | 47.99109102 |
| REL          | NM_002908    | 91.69369417 | 1.057895929 | 6.53E-10    | 86.6755336  |
| NGFRAP1      | NM_206917    | 68.83655131 | 9.867818603 | 0.000271106 | 6.975863064 |
| SVIL         | NM_003174    | 49.63191953 | 1.28494181  | 2.28E-05    | 38.62581103 |
| CAMK2G       | NM_172171    | 148.8365513 | 2.906869101 | 4.52E-15    | 51.2016696  |
| NUF2         | NM_145697    | 55.34620525 | 0.317371965 | 1.23E-07    | 174.3890807 |
| RPS23        | NM_001025    | 90.16216501 | 17.97688245 | 7.42E-05    | 5.015450551 |
| PSMD7        | NM_002811    | 83.91763382 | 8.281777754 | 3.82E-06    | 10.13280437 |
| HIBCH        | NM_014362    | 61.59073644 | 0.637130517 | 2.66E-07    | 96.66894736 |
| NHLRC3       | NM_001012754 | 44.71300204 | 2.662580257 | 0.000117365 | 16.79310959 |

|            |              |             |             |             |             |
|------------|--------------|-------------|-------------|-------------|-------------|
| ADAMTS7    | NM_014272    | 80.79536822 | 2.724547194 | 8.41E-08    | 29.65460404 |
| ALDH6A1    | NM_001278594 | 73.28443061 | 2.53894754  | 1.43E-07    | 28.864098   |
| PEX11B     | NR_073493    | 40.79536822 | 2.257221924 | 0.000256401 | 18.07326421 |
| COPA       | NM_004371    | 113.0193079 | 1.887664111 | 7.94E-12    | 59.87257331 |
| KIF22      | NM_001256269 | 78.73359358 | 5.154042892 | 2.91E-07    | 15.27608427 |
| CASS4      | NM_001164115 | 21.3256137  | 0.016640398 | 0.002143505 | 1281.556698 |
| PPAP2C     | NM_177526    | 88.57142857 | 4.991858485 | 9.09E-08    | 17.74317698 |
| CCDC6      | NM_005436    | 95.61132799 | 0.826016592 | 8.16E-11    | 115.749888  |
| CASZ1      | NM_017766    | 41.59073644 | 0.474495472 | 5.44E-05    | 87.65254648 |
| XPO6       | NM_001270940 | 97.67310262 | 2.159021698 | 2.21E-09    | 45.23951876 |
| GIT2       | NM_057170    | 126.2445312 | 2.036858493 | 7.60E-13    | 61.98002052 |
| ZMYM3      | NM_005096    | 48.83655131 | 1.587238632 | 3.64E-05    | 30.76824765 |
| LINC00674  | NR_027418    | 84.71300204 | 0.176248815 | 1.44E-13    | 480.6443779 |
| COL6A2     | NM_001849    | 101.8558592 | 0.385481969 | 5.40E-15    | 264.2298924 |
| ADAL       | NM_001159280 | 53.81467609 | 1.136767833 | 8.79E-06    | 47.34007644 |
| BAD        | NM_032989    | 84.4478793  | 9.158646004 | 3.88E-06    | 9.220563745 |
| ITCH       | NM_001257137 | 98.46847084 | 1.812381066 | 2.39E-09    | 54.33099733 |
| SRSF4      | NM_005626    | 79.26383906 | 4.406056678 | 6.74E-07    | 17.98974567 |
| GPATCH2L   | NM_017926    | 143.3873883 | 2.660496523 | 1.46E-14    | 53.89497302 |
| TCOF1      | NM_001135244 | 61.85585918 | 2.96962204  | 5.07E-06    | 20.82953937 |
| TMEM87A    | NM_001286487 | 73.28443061 | 0.634411785 | 3.84E-09    | 115.5155568 |
| EIF3J      | NM_001284336 | 151.6936942 | 3.835214823 | 4.03E-15    | 39.55285457 |
| WDR60      | NM_018051    | 89.63191953 | 0.033470281 | 4.60E-15    | 2677.955397 |
| LIN54      | NM_001115008 | 37.40797988 | 0.147177751 | 5.68E-05    | 254.1687159 |
| SORD       | NR_034039    | 186.7747767 | 1.985574684 | 2.86E-20    | 94.06585318 |
| POLR2G     | NM_002696    | 152.2239396 | 3.831233192 | 3.68E-16    | 39.73236084 |
| SOCS4      | NM_080867    | 120.7953682 | 1.975311139 | 9.99E-14    | 61.15257787 |
| PPP3R1     | NM_000945    | 120.2651227 | 1.971663124 | 3.83E-12    | 60.99679063 |
| GLUL       | NM_002065    | 77.40797988 | 12.84680305 | 8.44E-05    | 6.025466383 |
| EXTL2      | NM_001261442 | 79.26383906 | 1.847394781 | 1.21E-08    | 42.9057394  |
| DNAJC1     | NM_022365    | 103.9176338 | 0.129535143 | 2.75E-13    | 802.2350649 |
| SMARCB1    | NM_003073    | 122.1209819 | 2.116733143 | 7.55E-13    | 57.69314017 |
| LNP1       | NM_001085451 | 70.69241049 | 0.449819554 | 2.97E-09    | 157.1572642 |
| LINC01271  | NR_109950    | 83.91763382 | 5.439678901 | 5.08E-07    | 15.42694621 |
| DNAAF1     | NM_178452    | 52.22393965 | 1.725660211 | 4.63E-05    | 30.26316498 |
| VPS36      | NM_001282168 | 117.9382254 | 1.054868368 | 1.59E-13    | 111.8037368 |
| MVK        | NM_000431    | 43.91763382 | 2.528833952 | 0.000418366 | 17.36675268 |
| LGALS3     | NM_001177388 | 195.3462052 | 3.136369074 | 4.61E-21    | 62.28418933 |
| LSM5       | NM_001139499 | 135.3462052 | 6.956828252 | 6.15E-12    | 19.45515979 |
| TRAPPC10   | NM_003274    | 32.22393965 | 0.673495707 | 0.001027433 | 47.84579812 |
| DQX1       | NM_133637    | 37.67310262 | 1.300283502 | 0.000366321 | 28.97299134 |
| THAP3      | NM_138350    | 83.91763382 | 8.532518189 | 4.53E-06    | 9.835037202 |
| THOC7      | NM_001285404 | 35.34620525 | 1.980060845 | 0.003347353 | 17.85107025 |
| SLC25A32   | NR_102338    | 127.8352676 | 5.680067823 | 1.22E-11    | 22.50594035 |
| CASP2      | NM_032982    | 57.93822536 | 3.450159908 | 7.43E-05    | 16.79291016 |
| SMC1A      | NM_006306    | 44.18275656 | 1.130719698 | 0.000400723 | 39.07489772 |
| DUSP14     | NM_007026    | 37.40797988 | 1.922209806 | 0.001477526 | 19.46092449 |
| ERICH6-AS1 | NR_121674    | 44.18275656 | 0.041666405 | 1.30E-07    | 1060.392811 |
| HGSNAT     | NM_152419    | 92.75418513 | 0.626516699 | 1.97E-11    | 148.0474268 |
| IQCB1      | NM_001023570 | 172.4890624 | 0.330370519 | 1.56E-24    | 522.1079132 |
| RAB37      | NM_001006638 | 93.81467609 | 4.83456904  | 1.68E-08    | 19.40497184 |
| EPS8L2     | NM_022772    | 73.01930787 | 7.489525243 | 1.33E-05    | 9.749524236 |
| COG4       | NM_001195139 | 93.28443061 | 0.607785744 | 2.00E-12    | 153.4824263 |
| ATP2A3     | NM_174955    | 145.7142857 | 2.759135159 | 2.30E-15    | 52.81157947 |
| HNRNPH3    | NM_012207    | 156.1415735 | 5.306750872 | 6.00E-15    | 29.42319646 |
| SNX12      | NM_001256188 | 45.71428571 | 1.534700651 | 4.07E-05    | 29.78710257 |
| DGUOK-AS1  | NR_104029    | 94.61004431 | 3.703645296 | 9.71E-09    | 25.54511481 |
| PNPO       | NM_018129    | 189.8970423 | 10.19240022 | 1.75E-16    | 18.63123877 |
| POLR1B     | NM_001282776 | 122.1209819 | 4.298576044 | 2.10E-11    | 28.40963628 |
| PTRHD1     | NM_001013663 | 92.48906239 | 16.62682462 | 8.03E-05    | 5.562641363 |
| DCBLD1     | NM_173674    | 161.060491  | 1.275880496 | 4.80E-17    | 126.2347778 |
| ZC3HAV1    | NM_020119    | 141.5907364 | 1.443433917 | 2.87E-15    | 98.09298147 |
| PRDX5      | NM_012094    | 104.1827566 | 8.229541809 | 3.92E-08    | 12.65960596 |
| TRIM9      | NM_052978    | 69.89704227 | 1.183614844 | 9.62E-08    | 59.05387435 |

|           |              |             |             |             |             |
|-----------|--------------|-------------|-------------|-------------|-------------|
| CPM       | NM_001005502 | 92.22393965 | 0.515674795 | 2.46E-11    | 178.8412787 |
| SFPQ      | NM_005066    | 170.9575332 | 11.00323662 | 6.61E-14    | 15.53702235 |
| NEK3      | NM_152720    | 36.40669621 | 0.86698879  | 0.000110099 | 41.99211871 |
| ZNF169    | NM_003448    | 76.93694168 | 1.277075522 | 4.58E-08    | 60.24462953 |
| IQSEC1    | NM_014869    | 69.89704227 | 0.063284048 | 3.59E-11    | 1104.497026 |
| VRK1      | NM_003384    | 67.03989941 | 0.363378816 | 2.97E-08    | 184.4903899 |
| LEPREL4   | NM_006455    | 87.03989941 | 8.468524838 | 2.27E-06    | 10.27804737 |
| CGNL1     | NM_032866    | 71.69369417 | 0.52612586  | 3.49E-08    | 136.2671932 |
| UHMK1     | NM_175866    | 121.3256137 | 2.517888685 | 8.27E-13    | 48.18545571 |
| PKD1L2    | NM_001278425 | 41.06049096 | 0.440785229 | 7.11E-05    | 93.15305557 |
| LDHB      | NM_001174097 | 146.7747767 | 5.496989258 | 3.37E-13    | 26.70093933 |
| AUH       | NM_001698    | 78.73359358 | 0.577317093 | 3.13E-09    | 136.3784209 |
| PTGR2     | NM_001146154 | 130.162165  | 2.602003719 | 4.86E-14    | 50.02381974 |
| MMGT1     | NM_173470    | 60          | 1.411875517 | 5.67E-07    | 42.49666439 |
| YBX3      | NM_001145426 | 134.8159598 | 2.89290166  | 1.15E-13    | 46.60233067 |
| ATP10D    | NM_020453    | 70.69241049 | 0.071626994 | 9.44E-11    | 986.9520773 |
| UBA2      | NM_005499    | 121.8558592 | 3.424692549 | 1.86E-11    | 35.58154709 |
| NCAPG2    | NR_104054    | 109.8970423 | 0.688832876 | 2.64E-13    | 159.5409367 |
| E2F7      | NM_203394    | 180.7953682 | 2.728298727 | 2.98E-19    | 66.26670549 |
| GYS1      | NR_027763    | 101.3256137 | 5.557159961 | 5.13E-09    | 18.2333448  |
| TOX       | NM_014729    | 29.10167405 | 0.159246113 | 0.001996388 | 182.7465273 |
| RAD51B    | NM_133509    | 51.42857143 | 0.112634412 | 6.52E-06    | 456.597328  |
| SEL1L     | NM_001244984 | 69.36679679 | 1.495557703 | 4.51E-07    | 46.38189261 |
| SAYSD1    | NM_018322    | 131.9588169 | 3.191417066 | 1.06E-13    | 41.3480326  |
| GOSR2     | NM_001012511 | 186.0386157 | 4.189504605 | 1.37E-19    | 44.40587451 |
| CNN2      | NM_004368    | 95.61132799 | 10.77084816 | 2.33E-06    | 8.876861561 |
| FAM73A    | NM_198549    | 81.59073644 | 0.807724815 | 1.29E-09    | 101.0130367 |
| TPM2      | NM_001301227 | 109.6319195 | 11.69957893 | 1.57E-07    | 9.370586773 |
| MPI       | NM_001289155 | 157.9382254 | 14.05842962 | 2.34E-11    | 11.23441448 |
| B4GALNT1  | NM_001276468 | 40.79536822 | 4.285323551 | 0.002380547 | 9.519787183 |
| STOX1     | NM_001130160 | 123.1222656 | 0.941554235 | 1.54E-13    | 130.7649214 |
| PSCA      | NR_033343    | 63.18147288 | 8.417580149 | 0.000121099 | 7.505895015 |
| APLP2     | NM_001642    | 104.713002  | 1.016684734 | 3.73E-11    | 102.9945651 |
| STRN3     | NM_014574    | 117.9382254 | 1.548955784 | 1.42E-11    | 76.14047257 |
| SPIN3     | NR_027139    | 121.3256137 | 1.598438069 | 1.80E-14    | 75.90260519 |
| EPG5      | NM_020964    | 100.2651227 | 0.122248171 | 2.90E-14    | 820.1768718 |
| PGS1      | NR_111989    | 110.6924105 | 2.697348659 | 2.45E-11    | 41.03748698 |
| SLC12A9   | NM_001267814 | 84.18275656 | 2.928451755 | 3.41E-08    | 28.74650621 |
| MAST3     | NM_015016    | 123.6525111 | 3.364546666 | 2.82E-12    | 36.75161124 |
| CITED2    | NM_001168388 | 64.18275656 | 4.398811366 | 3.58E-05    | 14.59093178 |
| BRMS1L    | NM_032352    | 184.1827566 | 2.055704094 | 3.73E-20    | 89.59594775 |
| MRPL10    | NM_145255    | 185.773493  | 4.55131047  | 5.62E-20    | 40.81758303 |
| UGT8      | NM_001128174 | 98.99871632 | 0.515069754 | 1.54E-12    | 192.2044841 |
| GTF2H2C_2 | NM_001042490 | 170.4272878 | 2.38767904  | 3.31E-19    | 71.3778045  |
| TUFT1     | NM_001301317 | 173.0193079 | 0.366983996 | 2.23E-24    | 471.4628151 |
| ZNF780A   | NM_001142577 | 94.81595977 | 0.895133491 | 5.83E-12    | 105.9238212 |
| AGFG2     | NM_006076    | 81.06049096 | 3.037345667 | 4.70E-08    | 26.68793738 |
| LINC00920 | NR_046242    | 57.40797988 | 3.784132553 | 5.40E-05    | 15.17071061 |
| CPSF3     | NM_016207    | 35.08108251 | 2.032125513 | 0.003933777 | 17.26324594 |
| SLC46A3   | NM_181785    | 66.50965393 | 0.88649349  | 1.03E-07    | 75.02554133 |
| GCC2      | NR_028063    | 128.8365513 | 0.735403252 | 7.44E-15    | 175.1917074 |
| HNRNPC    | NM_001077442 | 178.7335936 | 6.835007057 | 1.61E-15    | 26.14973066 |
| CNKSR3    | NM_173515    | 110.4272878 | 1.443124569 | 3.63E-11    | 76.51958129 |
| EIF3CL    | NM_001099661 | 192.0180242 | 11.39000261 | 2.50E-15    | 16.8584706  |
| EFCAB2    | NM_001290327 | 132.2239396 | 0.740554807 | 2.27E-15    | 178.5471358 |
| ATAD3B    | NM_031921    | 106.2445312 | 2.139520438 | 1.26E-11    | 49.65810531 |
| ST3GAL5   | NM_003896    | 26.50965393 | 0.641094077 | 0.003591528 | 41.35064555 |
| YPEL1     | NM_013313    | 63.1222656  | 1.420787776 | 2.23E-06    | 44.42765252 |
| PABPC4    | NM_001135654 | 183.6525111 | 6.34581172  | 7.65E-17    | 28.94074378 |
| FXR1      | NM_001013438 | 103.9176338 | 2.629054314 | 4.06E-10    | 39.52662114 |
| HSPA2     | NM_021979    | 35.34620525 | 2.899092628 | 0.002863889 | 12.19216141 |
| INVS      | NM_183245    | 104.4478793 | 0.538189965 | 4.78E-12    | 194.0725136 |
| GNL2      | NM_013285    | 118.9987163 | 1.165185433 | 3.24E-14    | 102.1285651 |
| CLSPN     | NM_001190481 | 144.9781248 | 2.555322471 | 1.37E-15    | 56.73574527 |



|              |              |             |             |             |             |
|--------------|--------------|-------------|-------------|-------------|-------------|
| LAMTOR5-AS1  | NR_102697    | 87.57014489 | 5.397793929 | 6.76E-08    | 16.22332124 |
| CPTP         | NM_001029885 | 96.14157347 | 10.70481146 | 5.42E-07    | 8.981155232 |
| PRKAB2       | NM_005399    | 67.03989941 | 4.286870018 | 1.03E-05    | 15.63842597 |
| PARP16       | NM_017851    | 72.75418513 | 4.052224246 | 4.00E-06    | 17.95413598 |
| SLU7         | NM_006425    | 72.22393965 | 0.643658956 | 4.41E-09    | 112.208397  |
| RBMX2        | NM_016024    | 57.14285714 | 0.40595152  | 5.53E-08    | 140.762762  |
| GLS          | NM_014905    | 195.0810825 | 2.272747724 | 4.84E-20    | 85.83490392 |
| CYB5D2       | NM_144611    | 58.46847084 | 9.156660038 | 0.001530526 | 6.38534909  |
| SWT1         | NM_001105518 | 45.97940845 | 0.473282522 | 2.38E-05    | 97.15002422 |
| PDHA1        | NM_001173455 | 80.79536822 | 1.662351977 | 4.73E-09    | 48.60304516 |
| ENTPD6       | NM_001114089 | 95.87645073 | 3.178712242 | 6.48E-10    | 30.16204155 |
| BCAS4        | NM_198799    | 51.69369417 | 0.88338685  | 5.66E-06    | 58.5176179  |
| SLC35F5      | NM_025181    | 158.4684708 | 1.145085603 | 2.25E-18    | 138.3900649 |
| NFX1         | NM_002504    | 81.59073644 | 2.048843962 | 4.85E-08    | 39.82281617 |
| ULBP3        | NM_024518    | 121.060491  | 3.083730192 | 2.56E-13    | 39.25780903 |
| SMTN         | NM_006932    | 178.9987163 | 13.15218486 | 4.28E-14    | 13.60980842 |
| TAB3         | NM_152787    | 32.48906239 | 0.251704141 | 0.000438885 | 129.0763919 |
| SMN2         | NM_022876    | 129.9562496 | 14.80811211 | 1.96E-08    | 8.7760174   |
| GNPDA1       | NM_005471    | 80.79536822 | 5.409805448 | 1.35E-06    | 14.93498593 |
| MCOLN3       | NM_001253693 | 84.71300204 | 0.253411997 | 4.15E-13    | 334.2896272 |
| XYLT2        | NR_110010    | 66.24453119 | 5.3939451   | 1.12E-05    | 12.2812765  |
| SAP130       | NM_001145928 | 77.93822536 | 0.886598141 | 5.72E-09    | 87.90704807 |
| CHPT1        | NM_020244    | 83.1222656  | 1.193986779 | 3.85E-09    | 69.61740874 |
| BTN3A3       | NM_006994    | 26.24453119 | 0.440440921 | 0.001095033 | 59.58695019 |
| RAB4B        | NM_016154    | 78.46847084 | 3.458532166 | 4.84E-07    | 22.68837387 |
| TUBGCP5      | NM_052903    | 95.87645073 | 0.955724077 | 5.74E-11    | 100.3181284 |
| PAXBP1       | NM_013329    | 123.6525111 | 0.827057424 | 2.87E-15    | 149.508979  |
| CHST12       | NM_001243795 | 83.38738834 | 1.663916656 | 8.29E-09    | 50.11512328 |
| TFAM         | NR_073073    | 104.4478793 | 4.447721839 | 2.10E-10    | 23.48345582 |
| EIF3H        | NM_003756    | 127.5701449 | 0.689135594 | 3.14E-15    | 185.1161746 |
| LOC101928069 | NR_120586    | 189.8970423 | 17.53500129 | 1.55E-13    | 10.82959956 |
| BZW2         | NM_014038    | 155.3462052 | 0.693732266 | 1.96E-18    | 223.9281821 |
| RRP9         | NM_004704    | 70.16216501 | 1.689287736 | 8.06E-08    | 41.53357864 |
| DDX49        | NM_019070    | 78.46847084 | 5.623921556 | 1.73E-06    | 13.95262542 |
| ATXN10       | NM_001167621 | 128.8365513 | 1.131806447 | 4.02E-14    | 113.8326713 |
| KHDC1        | NM_001251874 | 197.6731026 | 1.883121025 | 4.06E-21    | 104.9710029 |
| RHBDF2       | NM_024599    | 167.8352676 | 7.434298086 | 6.63E-15    | 22.5758055  |
| TMEM56       | NM_152487    | 102.3861047 | 0.530851206 | 7.56E-13    | 192.8715683 |
| MYH10        | NM_005964    | 88.83655131 | 1.160110093 | 8.69E-10    | 76.57596624 |
| MLEC         | NM_014730    | 121.060491  | 2.606416586 | 6.40E-13    | 46.44709967 |
| AASDH        | NM_001286671 | 136.6718189 | 0.911674896 | 5.93E-16    | 149.9128906 |
| INO80B       | NM_031288    | 132.2239396 | 21.81499145 | 3.93E-07    | 6.061150195 |
| LCLAT1       | NM_001002257 | 53.01930787 | 0.275882719 | 1.99E-06    | 192.1806054 |
| POLR3K       | NM_016310    | 74.55083703 | 2.872304984 | 6.55E-08    | 25.95505611 |
| WASF2        | NM_001201404 | 98.46847084 | 1.443511461 | 9.66E-10    | 68.21454036 |
| CES2         | NM_198061    | 113.0193079 | 6.325986184 | 1.84E-10    | 17.86587965 |
| STK40        | NM_032017    | 111.9588169 | 4.385960939 | 5.45E-10    | 25.52663338 |
| MGAT1        | NM_002406    | 97.93822536 | 4.574987584 | 1.21E-08    | 21.40732047 |
| PACS1        | NM_018026    | 61.06049096 | 0.600925134 | 8.05E-07    | 101.6108122 |
| FMNL3        | NM_198900    | 34.81595977 | 0.514445426 | 0.000361579 | 67.67668245 |
| LYPLA1       | NM_001279356 | 83.38738834 | 1.809013919 | 2.74E-08    | 46.09549295 |
| ARHGAP17     | NM_001006634 | 51.69369417 | 0.667407188 | 5.13E-06    | 77.45450621 |
| GRINA        | NM_000837    | 123.1222656 | 8.599672444 | 4.24E-10    | 14.31708782 |
| SLC25A19     | NM_021734    | 201.3256137 | 3.751147367 | 3.52E-21    | 53.67040908 |
| LOC439933    | NR_122079    | 46.50965393 | 2.001459176 | 0.000207574 | 23.23787289 |
| DNAJC7       | NM_003315    | 138.7335936 | 2.54524072  | 8.62E-15    | 54.50706193 |
| KLHL22       | NR_033825    | 63.65251108 | 2.635600519 | 5.47E-06    | 24.15104664 |
| ACTR2        | NM_001005386 | 55.87645073 | 0.85608771  | 5.37E-07    | 65.26953966 |
| ZNF250       | NM_021061    | 130.4272878 | 2.231490732 | 7.84E-15    | 58.44850075 |
| GLT8D1       | NM_001278281 | 106.2445312 | 9.584044224 | 3.01E-08    | 11.08556354 |
| MTFR1L       | NM_001099625 | 137.6731026 | 6.491991996 | 6.14E-12    | 21.20660387 |
| DTX2         | NM_001102594 | 138.7335936 | 2.682309727 | 1.29E-14    | 51.72169051 |
| DHRS1        | NM_138452    | 43.38738834 | 3.975982494 | 0.001373531 | 10.91236906 |
| UBE2W        | NR_073121    | 135.3462052 | 1.935452241 | 1.60E-13    | 69.9300155  |

|              |              |             |             |             |             |
|--------------|--------------|-------------|-------------|-------------|-------------|
| PHF6         | NM_032335    | 68.83655131 | 1.674596933 | 6.90E-07    | 41.10634025 |
| ATP1B3       | NM_001679    | 169.6319195 | 2.049818208 | 3.21E-18    | 82.75461644 |
| ULK4P3       | NR_026859    | 54.55083703 | 2.870353717 | 3.01E-05    | 19.004918   |
| LMBR1L       | NM_001300750 | 71.22265597 | 3.915507624 | 1.59E-06    | 18.18989077 |
| MYO6         | NM_001300899 | 149.6319195 | 0.589747509 | 3.04E-17    | 253.7220033 |
| ZNF24        | NM_006965    | 78.46847084 | 1.572205038 | 3.41E-09    | 49.90982026 |
| L3HYPDH      | NM_144581    | 184.4478793 | 6.579106694 | 7.49E-18    | 28.03539871 |
| LRCH3        | NM_032773    | 181.3256137 | 0.078054105 | 6.43E-30    | 2323.075957 |
| TPCN1        | NM_017901    | 178.4684708 | 1.976636022 | 1.69E-18    | 90.28899043 |
| NUP54        | NR_103781    | 124.1827566 | 2.114095346 | 2.64E-13    | 58.7403765  |
| DCAF4        | NM_181341    | 34.55083703 | 2.608895603 | 0.003783074 | 13.24347244 |
| LACTB        | NM_032857    | 61.06049096 | 3.756665867 | 4.18E-05    | 16.25390522 |
| MRPS23       | NM_016070    | 102.1209819 | 1.275767165 | 1.99E-12    | 80.04672383 |
| TOP3B        | NM_001282112 | 192.2239396 | 5.324886303 | 3.96E-18    | 36.09916319 |
| BAK1         | NM_001188    | 112.4890624 | 5.687037237 | 6.10E-10    | 19.77990607 |
| SLC30A7      | NM_133496    | 98.2033481  | 1.077522042 | 5.74E-10    | 91.13813388 |
| POLG         | NM_002693    | 198.4684708 | 8.109249254 | 1.12E-17    | 24.47433352 |
| TAF5L        | NM_014409    | 34.55083703 | 0.646575366 | 0.000236985 | 53.43667397 |
| TRIM5        | NM_033093    | 38.46847084 | 1.713855794 | 0.00131376  | 22.44557037 |
| DBNL         | NM_001014436 | 118.9987163 | 2.274487044 | 6.40E-13    | 52.31892468 |
| HIF1A        | NM_181054    | 120.7953682 | 1.986498387 | 1.80E-12    | 60.80818841 |
| ATG3         | NM_001278712 | 61.3256137  | 0.692053683 | 6.97E-08    | 88.61395462 |
| TMEM69       | NM_016486    | 135.8764507 | 4.609089847 | 4.17E-14    | 29.48010458 |
| NCKIPSD      | NM_016453    | 201.3256137 | 0.744005683 | 3.06E-29    | 270.5968762 |
| MAPK1        | NM_138957    | 147.5701449 | 0.637422906 | 4.03E-18    | 231.5105771 |
| SLC25A15     | NM_014252    | 146.2445312 | 4.047422809 | 1.49E-14    | 36.13275363 |
| UBE4A        | NM_004788    | 92.22393965 | 0.73116785  | 1.36E-10    | 126.132378  |
| LOC100505915 | NR_125434    | 87.03989941 | 2.483790865 | 1.39E-08    | 35.04316754 |
| GPS1         | NM_004127    | 54.28571429 | 8.024382246 | 0.001363399 | 6.765095757 |
| TRIM32       | NM_001099679 | 72.22393965 | 1.719066434 | 4.04E-08    | 42.01346628 |
| PLEKHG3      | NM_015549    | 90.16216501 | 2.524355317 | 3.00E-09    | 35.71690736 |
| C11orf24     | NM_022338    | 127.3050222 | 6.24077878  | 2.54E-11    | 20.39889998 |
| TBRG1        | NM_032811    | 133.5495533 | 3.027536215 | 9.36E-15    | 44.11162868 |
| OS9          | NM_001261420 | 25.24324752 | 0.919942369 | 0.003212876 | 27.44003142 |
| SLC31A1      | NM_001859    | 75.61132799 | 0.917605614 | 5.34E-08    | 82.40068153 |
| ARHGEF39     | NM_032818    | 124.1827566 | 10.97878331 | 2.50E-09    | 11.31115836 |
| TFCP2L1      | NM_014553    | 177.9382254 | 0.409834491 | 1.92E-24    | 434.1709383 |
| DYRK2        | NM_003583    | 129.6319195 | 2.882197453 | 5.31E-14    | 44.97676569 |
| RTKN         | NM_033046    | 73.28443061 | 4.058928668 | 8.94E-07    | 18.05511666 |
| SF3B1        | NM_001005526 | 81.85585918 | 0.709143463 | 7.59E-11    | 115.4291952 |
| FOXO1        | NM_002015    | 135.3462052 | 1.140498627 | 6.93E-14    | 118.6728349 |
| FRAS1        | NM_025074    | 66.50965393 | 0.722083345 | 3.65E-07    | 92.10800159 |
| BTG3         | NM_006806    | 146.7747767 | 2.140067764 | 3.53E-16    | 68.58417249 |
| UBE2G2       | NM_003343    | 100.7953682 | 2.516433963 | 2.17E-10    | 40.05484337 |
| BBS1         | NM_024649    | 107.3050222 | 3.560716948 | 2.06E-10    | 30.13579111 |
| MARK2        | NM_004954    | 41.06049096 | 2.236254811 | 0.001204423 | 18.36127563 |
| UTP14A       | NM_001166221 | 57.40797988 | 3.853715315 | 9.45E-05    | 14.89678796 |
| TAF6         | NM_005641    | 119.5289618 | 7.371746509 | 5.85E-10    | 16.21446989 |
| EIF4EBP1     | NM_004095    | 97.67310262 | 2.707611311 | 4.32E-10    | 36.07353176 |
| APBB3        | NM_006051    | 82.91635014 | 11.18902456 | 1.23E-05    | 7.410507477 |
| GSDMD        | NM_001166237 | 145.9794085 | 11.96572407 | 5.16E-11    | 12.19979732 |
| WDR1         | NM_017491    | 88.83655131 | 6.867694697 | 8.57E-07    | 12.93542524 |
| OSER1-AS1    | NR_038337    | 118.7335936 | 3.059594671 | 1.29E-12    | 38.80696836 |
| C19orf12     | NM_001256047 | 89.36679679 | 6.472673543 | 3.47E-07    | 13.80678265 |
| JKAMP        | NM_001284203 | 78.73359358 | 1.249394963 | 3.47E-09    | 63.01737714 |
| ZMYM1        | NM_001289089 | 73.81467609 | 1.694526725 | 1.24E-07    | 43.56064439 |
| RBPJ         | NM_005349    | 75.08108251 | 1.744213655 | 4.44E-07    | 43.04580593 |
| RFT1         | NM_052859    | 123.9176338 | 1.127809219 | 5.54E-14    | 109.8746417 |
| LOC101928053 | NR_120540    | 105.9794085 | 0.491058348 | 2.57E-15    | 215.8183624 |
| IL4R         | NM_001257997 | 66.77477667 | 2.363323618 | 2.44E-06    | 28.25460558 |
| FBXW5        | NM_018998    | 69.10167405 | 15.39866372 | 0.001891504 | 4.487511079 |
| SIKE1        | NR_049741    | 144.4478793 | 3.092959566 | 1.28E-15    | 46.70215573 |
| GFPT2        | NM_005110    | 135.3462052 | 1.342889337 | 1.00E-14    | 100.787311  |
| AIMP2        | NM_006303    | 118.7335936 | 10.72225547 | 9.23E-09    | 11.07356507 |

|            |              |             |             |             |             |
|------------|--------------|-------------|-------------|-------------|-------------|
| ZNF557     | NM_001044387 | 177.9382254 | 4.691841255 | 1.87E-17    | 37.92503106 |
| FUNDC1     | NM_173794    | 37.67310262 | 0.977570006 | 0.000767477 | 38.53749848 |
| MIDIIP1    | NM_001098791 | 120.5302455 | 22.69207623 | 2.40E-06    | 5.311556522 |
| CYB5R2     | NM_016229    | 115.0810825 | 6.363033294 | 5.65E-10    | 18.08588407 |
| USP28      | NM_020886    | 128.8365513 | 0.793183161 | 1.36E-15    | 162.429761  |
| NUP43      | NR_104456    | 81.3256137  | 0.901148789 | 1.56E-09    | 90.24659934 |
| ZNF518B    | NM_053042    | 43.38738834 | 5.142164912 | 0.002368995 | 8.437572322 |
| CCDC112    | NM_001040440 | 80.53024548 | 0.79635689  | 2.41E-09    | 101.123311  |
| PRC1       | NM_001267580 | 58.46847084 | 4.093527897 | 0.00011035  | 14.28314948 |
| ARL8B      | NM_018184    | 72.75418513 | 0.635745745 | 7.62E-09    | 114.4391225 |
| RRN3       | NM_018427    | 149.3667968 | 0.624484811 | 1.64E-19    | 239.184035  |
| ZNF641     | NM_001172681 | 123.6525111 | 3.567078791 | 2.35E-12    | 34.66492284 |
| MATR3      | NM_018834    | 137.9382254 | 2.968870501 | 2.33E-14    | 46.46151636 |
| NFKBIB     | NR_040515    | 79.26383906 | 0.681916443 | 2.62E-11    | 116.236879  |
| POLI       | NM_007195    | 74.34492157 | 1.571377698 | 7.17E-08    | 47.31193631 |
| NAA30      | NM_001011713 | 77.67310262 | 0.828772544 | 2.89E-09    | 93.72065127 |
| PBDC1      | NM_016500    | 74.55083703 | 4.151189611 | 6.10E-07    | 17.95890913 |
| ZDHHC16    | NM_198044    | 178.7335936 | 8.500869756 | 8.13E-16    | 21.0253302  |
| ATRIIP     | NM_001271022 | 141.5907364 | 3.989436862 | 1.40E-14    | 35.49140927 |
| LSM6       | NM_007080    | 92.75418513 | 2.581436535 | 2.66E-09    | 35.93122816 |
| INIP       | NM_021218    | 75.34620525 | 2.020379029 | 1.30E-07    | 37.29310401 |
| CDC14A     | NM_033312    | 172.4890624 | 0.352033317 | 1.25E-21    | 489.9793693 |
| ZNF552     | NM_024762    | 123.3873883 | 5.583888578 | 2.40E-11    | 22.09703625 |
| KIAA0430   | NM_001184999 | 65.97940845 | 3.46913079  | 3.06E-06    | 19.01900287 |
| ZNF324B    | NM_207395    | 130.162165  | 5.77212015  | 7.76E-13    | 22.55014823 |
| FAM168A    | NM_015159    | 75.61132799 | 1.053016046 | 3.52E-08    | 71.80453544 |
| DHX40      | NM_001166301 | 58.2033481  | 2.022141213 | 1.56E-05    | 28.78302847 |
| ZDHHC8P1   | NR_003950    | 54.81595977 | 1.03657257  | 1.95E-06    | 52.88193162 |
| GTF2B      | NM_001514    | 141.3256137 | 0.92414715  | 7.48E-17    | 152.9254445 |
| FXR2       | NM_004860    | 106.2445312 | 3.924493929 | 5.82E-10    | 27.07216093 |
| SLC16A13   | NM_201566    | 95.08108251 | 8.974619701 | 6.99E-07    | 10.5944414  |
| TTLL13     | NR_104604    | 78.73359358 | 5.5423529   | 8.93E-07    | 14.20580663 |
| LPCAT4     | NM_153613    | 46.24453119 | 5.995617914 | 0.003212944 | 7.713055077 |
| COMMD5     | NM_014066    | 118.9987163 | 11.92265274 | 2.83E-08    | 9.980892582 |
| DNMBP      | NM_015221    | 54.55083703 | 2.943856447 | 5.74E-05    | 18.53039984 |
| TIMM8B     | NM_012459    | 101.060491  | 21.24959371 | 0.000117248 | 4.755878739 |
| MIDN       | NM_177401    | 223.1222656 | 25.31444163 | 2.24E-14    | 8.814030697 |
| MSRB1      | NM_016332    | 76.14157347 | 8.180409532 | 1.95E-05    | 9.307794819 |
| SNRPE      | NM_003094    | 58.46847084 | 1.635761096 | 1.24E-06    | 35.74389376 |
| MDH2       | NM_001282404 | 146.7747767 | 6.090073632 | 2.97E-13    | 24.10065716 |
| LENG1      | NM_024316    | 118.2033481 | 23.21022249 | 7.83E-06    | 5.092727921 |
| CDC40      | NM_015891    | 90.16216501 | 0.189862792 | 1.16E-13    | 474.8806433 |
| C15orf57   | NM_001080792 | 127.0398994 | 4.696035328 | 4.90E-12    | 27.05258597 |
| LYSMD2     | NM_153374    | 60.79536822 | 2.585994811 | 2.95E-06    | 23.50947031 |
| PITPNA-AS1 | NR_028514    | 161.060491  | 12.77800281 | 3.75E-10    | 12.60451209 |
| LINC00869  | NR_111952    | 40.26512274 | 1.59671999  | 0.000882863 | 25.21739753 |
| SLC20A2    | NM_001257181 | 43.65251108 | 0.500766614 | 4.95E-05    | 87.17136856 |
| TMCO3      | NM_017905    | 152.7541851 | 1.658741391 | 3.04E-16    | 92.09041626 |
| ZNF81      | NM_007137    | 48.83655131 | 0.466455914 | 7.09E-06    | 104.6970353 |
| SREBF2     | NM_004599    | 94.81595977 | 3.702751208 | 4.78E-09    | 25.60689456 |
| STX18      | NM_016930    | 93.01930787 | 1.133562756 | 1.47E-10    | 82.05924847 |
| LIAS       | NM_001278591 | 121.8558592 | 7.508177808 | 2.89E-10    | 16.22975138 |
| CUL9       | NM_015089    | 106.5096539 | 3.022897685 | 1.13E-10    | 35.23429009 |
| CDKN2A     | NM_058195    | 43.1222656  | 1.001048294 | 0.000213744 | 43.07710811 |
| TWSG1      | NM_020648    | 123.3873883 | 0.610192494 | 1.39E-15    | 202.2105966 |
| SDHAP1     | NR_003264    | 129.8970423 | 5.588327892 | 6.46E-12    | 23.24434872 |
| IFT22      | NM_001287525 | 69.10167405 | 4.995495426 | 1.15E-05    | 13.83279698 |
| RHNO1      | NM_001257098 | 112.7541851 | 3.584278211 | 1.34E-11    | 31.45798917 |
| LOC257396  | NR_034107    | 149.6319195 | 6.128983746 | 1.72E-14    | 24.41382221 |
| DIDO1      | NM_001193370 | 92.75418513 | 4.31759241  | 5.10E-08    | 21.48284885 |
| PTPN18     | NM_014369    | 187.8352676 | 11.45514858 | 2.65E-15    | 16.39745363 |
| CWC25      | NM_017748    | 47.30502215 | 0.551683107 | 1.46E-06    | 85.74672951 |
| ANAPC4     | NM_013367    | 181.5907364 | 2.05605296  | 2.12E-20    | 88.32006763 |
| VAMP1      | NM_199245    | 115.611328  | 9.704001325 | 9.87E-09    | 11.91377908 |

|              |              |             |             |             |             |
|--------------|--------------|-------------|-------------|-------------|-------------|
| CPVL         | NM_031311    | 63.38738834 | 0.736707068 | 4.00E-07    | 86.0415097  |
| NT5DC1       | NM_152729    | 216.1415735 | 0.510574683 | 1.07E-26    | 423.3299857 |
| SLMO2        | NM_016045    | 78.46847084 | 4.915139399 | 1.55E-06    | 15.9646481  |
| CCNJL        | NM_024565    | 63.91763382 | 1.208774838 | 3.17E-06    | 52.8780314  |
| CFLIP1       | NR_028492    | 84.71300204 | 0.267378877 | 2.52E-13    | 316.8275785 |
| FBXO3        | NM_033406    | 77.93822536 | 0.08150236  | 1.82E-13    | 956.2695583 |
| TMEM254-AS1  | NR_027432    | 84.97812478 | 1.64813181  | 4.23E-09    | 51.56027221 |
| ERMAP        | NM_001017922 | 117.1428571 | 0.900086461 | 1.91E-14    | 130.1462274 |
| COX7A2L      | NM_004718    | 69.63191953 | 0.434833298 | 1.19E-09    | 160.1347457 |
| ATRX         | NM_000489    | 100         | 0.057548354 | 3.86E-14    | 1737.669175 |
| RPAP2        | NM_024813    | 238.2033481 | 1.147198666 | 1.14E-26    | 207.6391432 |
| LETMD1       | NR_045018    | 140.2651227 | 6.573645491 | 2.34E-12    | 21.33749423 |
| KDM6A        | NM_001291416 | 49.10167405 | 0.539525584 | 1.69E-05    | 91.00898184 |
| RNF217-AS1   | NR_026876    | 27.57014489 | 1.087379433 | 0.002110281 | 25.35466835 |
| EDF1         | NM_003792    | 55.34620525 | 5.470184098 | 0.000173188 | 10.11779572 |
| MAN1B1       | NR_045720    | 124.1827566 | 1.024961792 | 1.86E-15    | 121.1584251 |
| SIN3A        | NM_015477    | 40.53024548 | 2.230728747 | 0.001236335 | 18.16906046 |
| TSEN15       | NR_125335    | 161.3256137 | 0.602166817 | 1.01E-22    | 267.9085081 |
| WHSC1L1      | NM_017778    | 58.46847084 | 0.888932625 | 9.79E-07    | 65.77379342 |
| C14orf93     | NM_001130706 | 55.87645073 | 5.643323591 | 0.000117106 | 9.901337363 |
| MANEAL       | NM_001113482 | 60.53024548 | 1.652987793 | 2.22E-06    | 36.61868874 |
| CALCOCO2     | NM_001261395 | 119.2638391 | 2.138717423 | 6.44E-13    | 55.76418736 |
| BPGM         | NM_199186    | 117.9382254 | 0.055840204 | 1.03E-20    | 2112.06651  |
| PITPNB       | NM_001284277 | 77.40797988 | 1.266991748 | 9.55E-08    | 61.09588323 |
| CCT2         | NM_001198842 | 80.79536822 | 4.007465479 | 2.18E-07    | 20.16121377 |
| C7orf49      | NM_001243751 | 113.8146761 | 15.86371653 | 4.48E-07    | 7.174527851 |
| TRAF4        | NM_004295    | 106.2445312 | 11.95816546 | 3.05E-07    | 8.884684828 |
| UPF3A        | NM_023011    | 73.28443061 | 3.606127883 | 1.50E-06    | 20.32219405 |
| PTPN6        | NM_080548    | 106.2445312 | 3.633617206 | 1.31E-10    | 29.23932962 |
| EPHX2        | NM_001256482 | 128.1003904 | 1.711092182 | 1.27E-13    | 74.86469268 |
| SNX22        | NR_073534    | 131.9588169 | 16.69420356 | 1.41E-08    | 7.904469143 |
| PEX19        | NR_036493    | 50.42728775 | 3.551066249 | 0.000130973 | 14.20060461 |
| CENPM        | NM_024053    | 90.16216501 | 4.827328861 | 2.27E-08    | 18.67744411 |
| NMT2         | NM_004808    | 175.0810825 | 1.732637285 | 8.92E-19    | 101.0488947 |
| SCAMP4       | NM_079834    | 101.3256137 | 4.757116746 | 2.83E-09    | 21.29979547 |
| SNAPIN       | NR_052020    | 140.7953682 | 17.46684796 | 1.18E-08    | 8.060719857 |
| RPS16        | NM_001020    | 124.713002  | 15.48704011 | 4.47E-08    | 8.052733198 |
| RASAL2       | NM_170692    | 92.75418513 | 0.182579894 | 9.25E-11    | 508.0197109 |
| GTF2IP1      | NR_002206    | 66.50965393 | 7.99753911  | 0.000136792 | 8.316264918 |
| MUL1         | NM_024544    | 90.16216501 | 1.800842279 | 1.30E-10    | 50.06666384 |
| DPH3         | NM_206831    | 65.97940845 | 2.735537358 | 1.34E-06    | 24.11935932 |
| ZNF354A      | NM_005649    | 151.9588169 | 0.689717525 | 2.57E-21    | 220.3203651 |
| SNX6         | NM_152233    | 181.3256137 | 1.738653228 | 2.88E-19    | 104.2908446 |
| HAX1         | NM_001018837 | 64.4478793  | 0.24285176  | 1.28E-09    | 265.3795029 |
| SYS1         | NM_001099791 | 81.59073644 | 3.837065642 | 7.08E-08    | 21.2638365  |
| POLD2        | NM_001127218 | 113.2844306 | 4.585891898 | 3.24E-11    | 24.70281313 |
| LOC100133315 | NR_029192    | 83.38738834 | 1.107077678 | 1.51E-08    | 75.32207537 |
| RNF113A      | NM_006978    | 71.95881691 | 10.06096641 | 0.000437153 | 7.152276824 |
| RETSAT       | NM_017750    | 115.0810825 | 5.14027075  | 1.76E-10    | 22.38813636 |
| BICD1        | NM_001714    | 34.81595977 | 0.618182768 | 0.000643394 | 56.31984839 |
| LOC100996447 | NR_104147    | 21.3256137  | 0.119552921 | 0.00460699  | 178.3780229 |
| COPS7A       | NM_001164093 | 84.4478793  | 3.565677046 | 3.73E-08    | 23.68354683 |
| MYNN         | NR_033702    | 137.9382254 | 2.842376711 | 8.81E-15    | 48.52918504 |
| NUDT4P1      | NR_002212    | 144.9781248 | 3.354944025 | 9.15E-15    | 43.21327679 |
| PLEKHA5      | NM_001143821 | 54.28571429 | 0.637485835 | 4.38E-06    | 85.15595371 |
| WBSCR16      | NM_001281441 | 106.2445312 | 2.63952858  | 1.16E-10    | 40.25132821 |
| M1AP         | NM_138804    | 93.01930787 | 0.977864418 | 6.74E-11    | 95.12495413 |
| TPP2         | NM_003291    | 85.97940845 | 0.903981154 | 5.10E-10    | 95.11194795 |
| MYBL2        | NM_002466    | 45.97940845 | 2.428332738 | 0.000295275 | 18.93455857 |
| ATP5J2       | NM_004889    | 123.6525111 | 8.166308202 | 5.65E-10    | 15.14178843 |
| SLC25A51     | NR_024872    | 95.61132799 | 3.857802398 | 1.31E-08    | 24.78388423 |
| XPNPEP1      | NM_001167604 | 104.713002  | 2.422948447 | 1.37E-10    | 43.21718119 |
| ATP6V1C2     | NM_001039362 | 29.89704227 | 1.017322236 | 0.002161945 | 29.38797681 |
| MMAA         | NM_172250    | 54.81595977 | 0.302624149 | 1.50E-07    | 181.1354444 |

|              |              |             |             |             |             |
|--------------|--------------|-------------|-------------|-------------|-------------|
| ACTN1-AS1    | NR_073422    | 46.24453119 | 3.559650472 | 0.000541592 | 12.99131236 |
| QSOX1        | NM_001004128 | 189.6319195 | 0.622995344 | 9.25E-25    | 304.3873785 |
| C2CD2L       | NM_001290474 | 54.81595977 | 1.560555815 | 3.08E-06    | 35.12592068 |
| RDH14        | NM_020905    | 83.91763382 | 8.209321868 | 1.72E-06    | 10.22223701 |
| TNFRSF10D    | NM_003840    | 163.9176338 | 3.647654814 | 2.22E-16    | 44.93781407 |
| ZRSR2        | NM_005089    | 100.7953682 | 0.925123184 | 1.04E-11    | 108.9534562 |
| PPM1H        | NM_020700    | 68.83655131 | 0.148224919 | 2.42E-08    | 464.4060655 |
| TDRKH        | NM_001083965 | 47.30502215 | 1.247928444 | 3.19E-05    | 37.90683863 |
| GTF2I        | NM_001518    | 70.42728775 | 0.795800176 | 3.03E-08    | 88.4987084  |
| PDIA5        | NR_028444    | 109.6319195 | 2.489656015 | 1.36E-10    | 44.03496662 |
| MAPK6        | NM_002748    | 78.2033481  | 2.013853029 | 1.09E-07    | 38.83269881 |
| ZNF544       | NM_014480    | 154.875167  | 2.548106831 | 8.94E-17    | 60.78048423 |
| CCDC173      | NM_001085447 | 47.30502215 | 0.326757683 | 1.87E-06    | 144.7709559 |
| S1PR2        | NM_004230    | 100.7953682 | 2.293479269 | 3.43E-11    | 43.94867204 |
| TMEM60       | NM_032936    | 75.87645073 | 8.87843939  | 1.95E-05    | 8.546147289 |
| DLG          | NM_001289752 | 78.99871632 | 0.849644364 | 3.10E-09    | 92.97856805 |
| SNX11        | NM_152244    | 128.3655131 | 4.809548816 | 5.49E-12    | 26.68972039 |
| RNF139-AS1   | NR_108047    | 175.8764507 | 9.537484725 | 3.95E-15    | 18.44054861 |
| DNAL4        | NM_005740    | 58.73359358 | 1.222628372 | 8.28E-07    | 48.03879487 |
| GTF2A1       | NM_001278940 | 157.9382254 | 2.94825939  | 1.98E-16    | 53.56998978 |
| CDC23        | NM_004661    | 69.63191953 | 2.299844387 | 5.32E-07    | 30.27679608 |
| KCNQ2        | NM_004518    | 80.79536822 | 1.319655558 | 4.70E-08    | 61.22458828 |
| USP46        | NM_022832    | 68.57142857 | 1.394105375 | 9.78E-07    | 49.18668975 |
| PTGES3       | NM_006601    | 84.97812478 | 6.655545189 | 1.08E-06    | 12.7680186  |
| PDCL         | NM_005388    | 87.03989941 | 5.449666055 | 2.43E-07    | 15.97160239 |
| ITGA6        | NM_001079818 | 148.3655131 | 1.789511541 | 2.31E-15    | 82.90838572 |
| LOC100288842 | NR_027442    | 177.9382254 | 3.508293719 | 2.86E-20    | 50.71930677 |
| ARL2BP       | NM_012106    | 138.4684708 | 5.007153647 | 3.46E-13    | 27.65412859 |
| CCDC13       | NM_144719    | 25.97940845 | 0.436939874 | 0.003388022 | 59.45762787 |
| UBAP2L       | NM_001287816 | 54.28571429 | 2.006863838 | 3.53E-05    | 27.05002365 |
| FAM213B      | NM_001195736 | 89.36679679 | 7.222907179 | 6.91E-07    | 12.37269074 |
| TBC1D23      | NM_001199198 | 30.42728775 | 0.585983713 | 0.000822358 | 51.92514246 |
| DUSP19       | NM_080876    | 80.26512274 | 3.096525966 | 2.37E-07    | 25.92102363 |
| WNK1         | NM_001184985 | 32.22393965 | 0.825006085 | 0.001243752 | 39.05903272 |
| SRSF2        | NM_003016    | 171.7529015 | 42.54832596 | 1.18E-06    | 4.036654735 |
| PDIA4        | NM_004911    | 50.69241049 | 3.187586543 | 6.15E-05    | 15.90306955 |
| IPO4         | NM_024658    | 97.93822536 | 8.400723273 | 1.09E-07    | 11.65830872 |
| EPM2A        | NM_001018041 | 106.7747767 | 1.092986397 | 5.90E-12    | 97.69085593 |
| JMY          | NM_152405    | 63.91763382 | 0.190364255 | 1.84E-08    | 335.7648938 |
| APPL2        | NM_018171    | 137.9382254 | 2.084747604 | 3.67E-14    | 66.16543178 |
| IFRD1        | NR_120333    | 187.5701449 | 2.070930272 | 4.34E-21    | 90.57289248 |
| TRAPPC6B     | NM_001079537 | 135.3462052 | 3.09024637  | 1.15E-13    | 43.79786886 |
| ST3GAL5-AS1  | NR_110569    | 44.4478793  | 2.442414836 | 0.000359496 | 18.19833332 |
| GTF3A        | NM_002097    | 86.77477667 | 7.891694495 | 2.34E-06    | 10.99570906 |
| USP3         | NM_001256702 | 57.40797988 | 1.14534098  | 1.67E-06    | 50.12304709 |
| MPP1         | NM_001166462 | 37.67310262 | 0.936098913 | 0.000119282 | 40.24478836 |
| RABGGTA      | NM_182836    | 104.4478793 | 7.196470979 | 1.49E-08    | 14.5137637  |
| PTPN4        | NM_002830    | 58.46847084 | 0.253636247 | 9.60E-07    | 230.5209591 |
| SH3GL1       | NM_003025    | 63.91763382 | 5.313264958 | 4.10E-05    | 12.0298224  |
| POLDIP3      | NR_103820    | 135.0810825 | 4.052061663 | 7.84E-13    | 33.33638373 |
| YES1         | NM_005433    | 118.4684708 | 0.742788009 | 5.40E-14    | 159.4916308 |
| YIPF5        | NM_001024947 | 66.77477667 | 2.453936143 | 3.77E-07    | 27.21129352 |
| MAGI1        | NM_004742    | 64.4478793  | 0.794769052 | 4.09E-07    | 81.09007158 |
| DARS2        | NM_018122    | 100.7953682 | 0.102015417 | 4.09E-17    | 988.0405455 |
| RNF44        | NM_014901    | 75.87645073 | 4.348981959 | 2.58E-07    | 17.44694539 |
| NFXL1        | NM_001278624 | 161.3256137 | 0.168503577 | 9.73E-25    | 957.4017141 |
| TIMM9        | NM_012460    | 64.4478793  | 2.251671456 | 7.03E-07    | 28.62223932 |
| A2M-AS1      | NR_026971    | 86.50965393 | 10.59729402 | 1.21E-05    | 8.163372065 |
| DIAPH2       | NM_007309    | 60          | 0.085768595 | 5.26E-07    | 699.556752  |
| HSD17B11     | NM_016245    | 67.03989941 | 1.031809053 | 1.09E-06    | 64.9731646  |
| CCNC         | NM_001013399 | 101.8558592 | 2.477263182 | 5.44E-11    | 41.11628506 |
| KIF4A        | NM_012310    | 60.53024548 | 0.308705719 | 2.62E-07    | 196.0774998 |
| NIPSNAP1     | NM_003634    | 110.162165  | 6.405885727 | 2.93E-09    | 17.19702313 |
| RALY         | NM_016732    | 102.3861047 | 4.284392418 | 7.20E-09    | 23.89746192 |

|              |              |             |             |             |             |
|--------------|--------------|-------------|-------------|-------------|-------------|
| LGMN         | NM_001008530 | 109.6319195 | 0.714460395 | 9.11E-13    | 153.4471614 |
| DCAF16       | NM_017741    | 181.8558592 | 1.076984063 | 1.50E-24    | 168.8565925 |
| RPL14        | NM_003973    | 132.4890624 | 11.14403266 | 6.94E-10    | 11.88878985 |
| PPAPDC1B     | NM_032483    | 154.8159598 | 7.396657135 | 9.82E-14    | 20.93053077 |
| LACC1        | NM_001128303 | 75.34620525 | 3.7536086   | 7.76E-07    | 20.07300528 |
| CAPN10       | NM_023085    | 112.4890624 | 2.654802759 | 4.28E-12    | 42.37190956 |
| MUT          | NM_000255    | 60.53024548 | 0.129146636 | 1.13E-09    | 468.69394   |
| POLH         | NM_006502    | 189.6319195 | 3.090413686 | 7.68E-19    | 61.36133825 |
| UQCRB        | NR_045639    | 69.69112681 | 7.090876808 | 2.02E-05    | 9.828280578 |
| TBC1D4       | NM_001286658 | 135.611328  | 0.633442482 | 3.20E-15    | 214.0862538 |
| SPTBN1       | NM_003128    | 82.85714286 | 1.404584407 | 7.49E-08    | 58.99050454 |
| DGKD         | NM_152879    | 71.42857143 | 1.420512901 | 7.80E-07    | 50.28364852 |
| MATN2        | NM_002380    | 107.0398994 | 1.284091595 | 2.45E-10    | 83.35846122 |
| LMTK2        | NM_014916    | 76.40669621 | 0.996254347 | 8.70E-09    | 76.69396516 |
| ENTPD4       | NM_004901    | 103.1222656 | 0.832026716 | 1.74E-12    | 123.9410509 |
| RNF145       | NM_001199380 | 63.65251108 | 1.71514508  | 3.89E-06    | 37.11202732 |
| POLE2        | NM_001197331 | 98.2033481  | 1.323742881 | 1.33E-10    | 74.18611991 |
| CARF         | NM_024744    | 55.08108251 | 0.089985667 | 4.19E-08    | 612.1095075 |
| NAA25        | NM_024953    | 55.08108251 | 1.928888741 | 4.43E-05    | 28.55586293 |
| HRH1         | NM_001098213 | 46.50965393 | 2.420659646 | 0.000375315 | 19.21362799 |
| CHAF1A       | NM_005483    | 42.12098192 | 3.480147981 | 0.000607662 | 12.10321577 |
| CFAP36       | NM_080667    | 43.91763382 | 2.304283358 | 0.000413984 | 19.05912902 |
| MRPS16       | NM_016065    | 143.6525111 | 21.86448603 | 2.44E-08    | 6.570129794 |
| PITX1        | NM_002653    | 46.24453119 | 5.789156297 | 0.002632549 | 7.988129673 |
| PDE12        | NM_177966    | 147.5701449 | 3.015646982 | 6.52E-17    | 48.93482088 |
| FBXO22       | NM_147188    | 192.7541851 | 3.407253706 | 1.08E-19    | 56.57171486 |
| NDUFB5       | NM_001199958 | 70.69241049 | 0.769060095 | 1.11E-08    | 91.92052861 |
| ERVK13-1     | NR_040023    | 91.95881691 | 5.1386797   | 1.01E-07    | 17.89541717 |
| CAMKMT       | NM_024766    | 155.611328  | 0.13802516  | 4.27E-19    | 1127.412769 |
| LOC101928436 | NM_001286997 | 37.40797988 | 0.007655328 | 1.52E-06    | 4886.528965 |
| MYCL         | NM_001033081 | 58.2033481  | 8.421585514 | 0.000891949 | 6.911210247 |
| PTOV1        | NM_017432    | 80          | 17.82673752 | 0.000443522 | 4.487641102 |
| SCML2        | NM_006089    | 40.53024548 | 0.327385551 | 7.62E-05    | 123.7997382 |
| ESPN         | NM_031475    | 203.6525111 | 13.74122835 | 6.86E-16    | 14.82054631 |
| MAGOHB       | NM_001300739 | 30.16216501 | 1.529198383 | 0.002908802 | 19.72416748 |
| SMS          | NM_001258423 | 74.55083703 | 1.597913092 | 2.03E-07    | 46.65512625 |
| PUS7L        | NM_001098615 | 63.65251108 | 0.670463125 | 2.74E-08    | 94.93812364 |
| PHLDA3       | NM_012396    | 103.3873883 | 11.49082361 | 4.06E-07    | 8.997387122 |
| C6orf132     | NM_001164446 | 75.61132799 | 3.889605685 | 2.70E-06    | 19.43932987 |
| MORC4        | NM_001085354 | 46.24453119 | 0.712870453 | 1.68E-05    | 64.8708766  |
| STIM2        | NM_001169118 | 86.50965393 | 0.478949203 | 5.77E-10    | 180.6238605 |
| SLC39A3      | NM_144564    | 98.73359358 | 2.193921399 | 9.34E-12    | 45.00325018 |
| VASP         | NM_003370    | 132.7541851 | 9.581129029 | 1.84E-10    | 13.85579765 |
| PHF14        | NR_033436    | 64.18275656 | 0.222498851 | 1.28E-07    | 288.4633173 |
| POMGNT1      | NM_017739    | 98.46847084 | 3.779542225 | 4.90E-10    | 26.05301515 |
| CMTM7        | NM_181472    | 160.7953682 | 2.620481626 | 1.89E-16    | 61.36099815 |
| ICT1         | NM_001545    | 176.4066962 | 6.880095021 | 1.25E-16    | 25.64015405 |
| RAB23        | NM_001278667 | 212.7541851 | 2.222323318 | 5.28E-23    | 95.73502802 |
| MRPL17       | NM_022061    | 157.9382254 | 13.41433707 | 8.46E-12    | 11.77383754 |
| TMC6         | NM_001127198 | 124.713002  | 8.165712728 | 3.43E-10    | 15.27276383 |
| SLC25A36     | NM_018155    | 129.3667968 | 0.083486547 | 3.17E-22    | 1549.552611 |
| PHLDA2       | NM_003311    | 166.7747767 | 25.80384791 | 1.10E-07    | 6.463174688 |
| RBP1         | NM_001130993 | 98.99871632 | 5.054984109 | 9.36E-09    | 19.58437736 |
| TMEM17       | NM_198276    | 47.30502215 | 2.281031866 | 0.00010272  | 20.73843109 |
| UAPI         | NM_003115    | 144.4478793 | 2.520970439 | 1.37E-15    | 57.29852167 |
| UBQLN4       | NM_020131    | 66.50965393 | 3.039324886 | 1.06E-06    | 21.88303535 |
| LOC101928794 | NR_111908    | 66.77477667 | 4.324809151 | 6.20E-06    | 15.43993604 |
| BTBD10       | NM_032320    | 150.6924105 | 0.367215601 | 1.44E-20    | 410.3649461 |
| STX3         | NM_001178040 | 42.38610466 | 3.441642101 | 0.000642194 | 12.31566311 |
| SERPINE1     | NM_000602    | 97.40797988 | 6.181151297 | 2.21E-08    | 15.75887326 |
| GPR108       | NM_001080452 | 69.63191953 | 8.189955492 | 7.93E-05    | 8.502112081 |
| OSR2         | NM_001142462 | 256.4066962 | 4.967434568 | 5.13E-28    | 51.61752866 |
| RAB3IL1      | NM_013401    | 71.95881691 | 1.088078751 | 3.23E-08    | 66.13383162 |
| ZC3H6        | NM_198581    | 79.26383906 | 0.835120202 | 1.36E-09    | 94.91309016 |

|          |              |             |             |             |             |
|----------|--------------|-------------|-------------|-------------|-------------|
| RGPD5    | NM_005054    | 258.7335936 | 4.548809951 | 2.61E-25    | 56.87940283 |
| PRKD2    | NM_001079880 | 68.83655131 | 6.625441317 | 1.29E-05    | 10.38973074 |
| ASAP3    | NM_001143778 | 71.95881691 | 1.592655295 | 4.34E-07    | 45.18166432 |
| ANGPTL4  | NR_104213    | 172.2239396 | 4.747481708 | 2.79E-17    | 36.27690431 |
| MPC1     | NM_016098    | 44.71300204 | 2.209342901 | 0.000147554 | 20.23814503 |
| HDAC2    | NR_033441    | 137.6731026 | 1.482122065 | 1.09E-15    | 92.88917958 |
| FAM115A  | NM_001206938 | 186.5096539 | 1.227400382 | 1.42E-21    | 151.9550235 |
| HERC3    | NM_001271602 | 29.36679679 | 0.803694339 | 0.002370584 | 36.53975817 |
| EIF2AK1  | NM_014413    | 149.3667968 | 3.151460415 | 1.57E-14    | 47.39605679 |
| ERAP1    | NM_016442    | 97.67310262 | 2.955705976 | 1.15E-09    | 33.04560854 |
| SLAIN2   | NM_020846    | 54.55083703 | 0.446316156 | 1.29E-06    | 122.2246525 |
| DAP3     | NM_004632    | 135.0810825 | 1.956417813 | 3.20E-14    | 69.04510971 |
| YOD1     | NM_001276320 | 66.50965393 | 9.348621308 | 0.000201047 | 7.114381013 |
| CYP24A1  | NM_001128915 | 50.42728775 | 5.500806316 | 0.000390939 | 9.167253827 |
| UAP1L1   | NM_207309    | 65.97940845 | 8.26804447  | 0.000138239 | 7.980050022 |
| CCDC113  | NM_001142302 | 61.3256137  | 1.327968497 | 3.75E-06    | 46.18002146 |
| BZW1     | NM_001207069 | 74.55083703 | 1.745106143 | 9.97E-09    | 42.71994419 |
| TCEA2    | NM_003195    | 110.162165  | 8.756969972 | 4.26E-09    | 12.57994093 |
| SGSM3    | NM_015705    | 130.162165  | 2.326891171 | 5.83E-14    | 55.93822634 |
| LUZP6    | NM_001128619 | 109.6319195 | 0.915220003 | 3.63E-12    | 119.7875037 |
| CEP55    | NM_001127182 | 132.7541851 | 1.694159842 | 8.51E-15    | 78.3598937  |
| EIF4G3   | NM_001198801 | 86.77477667 | 0.84856556  | 2.75E-09    | 102.260545  |
| LIMA1    | NM_016357    | 143.9176338 | 0.581987713 | 2.20E-17    | 247.2863785 |
| GRHPR    | NM_012203    | 137.9382254 | 10.64421815 | 1.69E-10    | 12.95898143 |
| PAWR     | NM_002583    | 134.8159598 | 1.593896681 | 1.20E-13    | 84.58262155 |
| CCDC12   | NR_102269    | 92.75418513 | 3.876947096 | 6.31E-08    | 23.92454239 |
| UNC119B  | NM_001080533 | 143.9176338 | 3.999220431 | 2.74E-14    | 35.98642193 |
| ZNF84    | NM_001289971 | 49.89704227 | 2.674634611 | 0.000111854 | 18.65564816 |
| ZNF181   | NM_001145665 | 32.75418513 | 2.063486006 | 0.003248733 | 15.87322862 |
| C11orf57 | NM_001301021 | 158.7335936 | 4.547232513 | 1.13E-16    | 34.90773633 |
| NAA35    | NM_024635    | 112.2239396 | 1.407383474 | 2.10E-11    | 79.73941838 |
| SLC3A2   | NM_001012664 | 112.4890624 | 11.95749694 | 1.59E-07    | 9.407408837 |
| THG1L    | NM_017872    | 86.50965393 | 1.036220305 | 9.25E-11    | 83.48577374 |
| RPRD2    | NM_001297673 | 80.53024548 | 0.265571359 | 3.18E-10    | 303.2339242 |
| MAVS     | NM_001206491 | 124.713002  | 11.45032772 | 1.47E-09    | 10.8916535  |
| PUS1     | NM_001002020 | 63.38738834 | 5.766746614 | 2.31E-05    | 10.99188027 |
| DDX42    | NM_203499    | 138.9987163 | 5.079819254 | 7.19E-13    | 27.3629256  |
| MICALL1  | NM_033386    | 45.97940845 | 2.394932488 | 0.000256124 | 19.19862405 |
| SETD9    | NM_153706    | 92.75418513 | 16.53497334 | 4.20E-05    | 5.609575729 |
| PAK1     | NM_002576    | 54.81595977 | 1.622630173 | 5.16E-05    | 33.7821647  |
| COMT     | NM_000754    | 100.7953682 | 6.804569223 | 4.82E-08    | 14.81289482 |
| STK4     | NM_006282    | 125.9794085 | 0.784227227 | 1.21E-14    | 160.6414623 |
| PSMC5    | NM_001199163 | 116.9369417 | 16.14112623 | 1.66E-07    | 7.244658149 |
| XRR1A1   | NM_001270380 | 98.99871632 | 0.38879001  | 1.82E-12    | 254.6328705 |
| MIEN1    | NM_032339    | 173.2844306 | 29.00750827 | 6.61E-08    | 5.973778547 |
| TUBA4B   | NR_003063    | 49.63191953 | 4.515861611 | 0.0006497   | 10.99057584 |
| LAMTOR3  | NR_024170    | 37.14285714 | 0.356499263 | 1.82E-05    | 104.1877528 |
| SMIM15   | NM_001048249 | 121.5907364 | 1.424377311 | 2.29E-15    | 85.36413455 |
| KREMEN2  | NM_024507    | 101.3256137 | 13.4685519  | 1.67E-06    | 7.523126054 |
| HOMER3   | NM_001145722 | 47.03989941 | 4.819317288 | 0.000946008 | 9.76069775  |
| DSCAS    | NR_110785    | 32.22393965 | 0.630133445 | 0.000822358 | 51.13827857 |
| TEP1     | NM_007110    | 200.5302455 | 0.231924264 | 6.75E-30    | 864.6367638 |
| IGBP1    | NM_001551    | 35.34620525 | 1.864620876 | 0.003388516 | 18.95624237 |
| CRYL1    | NM_015974    | 112.2239396 | 1.083328024 | 1.56E-12    | 103.5918366 |
| SNAI3    | NM_178310    | 46.50965393 | 3.549926385 | 0.000603196 | 13.10158265 |
| EEF1B2   | NM_021121    | 70.16216501 | 15.18381885 | 0.00079607  | 4.620851034 |
| ARMC2    | NM_001286609 | 98.46847084 | 0.31522684  | 3.71E-12    | 312.373372  |
| TOR1AIP1 | NM_001267578 | 67.03989941 | 2.867342169 | 2.25E-06    | 23.38050203 |
| GLE1     | NM_001003722 | 122.3861047 | 0.944584923 | 1.51E-14    | 129.5660154 |
| PRICKLE1 | NM_153026    | 28.83655131 | 0.771021804 | 0.002409353 | 37.40043557 |
| TRIM45   | NM_025188    | 64.4478793  | 3.891040816 | 4.78E-06    | 16.56314656 |
| MED1     | NM_004774    | 110.4272878 | 4.99631736  | 6.49E-10    | 22.1017361  |
| MRPL45   | NM_032351    | 55.87645073 | 2.712023519 | 1.31E-05    | 20.60323236 |
| TXNRD3   | NM_001173513 | 135.8764507 | 1.032929993 | 9.03E-16    | 131.5446852 |

|         |              |             |             |             |              |
|---------|--------------|-------------|-------------|-------------|--------------|
| IRAK2   | NM_001570    | 33.01930787 | 0.215457424 | 0.000192779 | 153.2521243  |
| MPC2    | NR_026550    | 66.77477667 | 2.337442338 | 7.87E-07    | 28.56745409  |
| NOM1    | NM_138400    | 90.16216501 | 3.734039407 | 2.02E-08    | 24.14601326  |
| ZNF48   | NM_001214907 | 75.08108251 | 10.87825277 | 6.37E-05    | 6.901943176  |
| MAP2K1  | NM_002755    | 117.4079799 | 2.616370178 | 2.06E-11    | 44.87437628  |
| RFC4    | NM_002916    | 77.93822536 | 5.339336795 | 7.50E-07    | 14.59698617  |
| RCE1    | NM_005133    | 149.1016741 | 18.39595097 | 1.56E-09    | 8.105135435  |
| ZC3H18  | NM_144604    | 64.18275656 | 1.04991022  | 2.27E-07    | 61.13166187  |
| GBAS    | NM_001483    | 77.67310262 | 0.650702245 | 3.66E-10    | 119.3681184  |
| B3GAT3  | NR_109991    | 135.8764507 | 9.145125458 | 1.09E-11    | 14.85780062  |
| ACVR2B  | NM_001106    | 45.97940845 | 4.034433625 | 0.001526476 | 11.39674431  |
| CAPRIN1 | NM_203364    | 162.8571429 | 2.68685924  | 3.62E-17    | 60.61245801  |
| SIRT3   | NM_012239    | 123.9176338 | 4.462142947 | 7.00E-12    | 27.77087944  |
| ICOSLG  | NM_001283052 | 107.3050222 | 4.077914326 | 7.79E-11    | 26.31370195  |
| ITSN2   | NM_006277    | 152.2239396 | 0.292613303 | 3.13E-19    | 520.2222109  |
| PXT1    | NM_152990    | 81.06049096 | 0.505099852 | 2.09E-10    | 160.4840917  |
| UNC13B  | NM_006377    | 130.6924105 | 0.03857428  | 1.75E-20    | 3388.071251  |
| CEMIP   | NM_001293304 | 37.93822536 | 0.925214148 | 0.000314345 | 41.00480462  |
| CLTCL1  | NM_001835    | 112.2239396 | 1.456184267 | 4.07E-11    | 77.06712825  |
| RPL19   | NM_000981    | 153.0193079 | 17.79257744 | 4.34E-10    | 8.600176584  |
| PAIP1   | NM_006451    | 161.8558592 | 1.190932034 | 4.74E-20    | 135.90668818 |
| LITAF   | NR_024320    | 38.99871632 | 2.624751991 | 0.00107253  | 14.85805762  |
| SNHG20  | NR_027058    | 116.6718189 | 6.923060343 | 6.61E-10    | 16.85263643  |
| ERLEC1  | NM_001127398 | 94.81595977 | 0.722992519 | 2.40E-11    | 131.1437633  |
| CNST    | NM_152609    | 95.08108251 | 0.123474104 | 1.21E-13    | 770.0487752  |
| LRTOMT  | NM_001145307 | 112.7541851 | 3.575184312 | 3.71E-11    | 31.53800624  |
| ZBED3   | NM_032367    | 130.162165  | 0.973607238 | 1.32E-17    | 133.69063    |
| GSKIP   | NM_016472    | 158.7335936 | 1.71874824  | 2.42E-19    | 92.35418539  |
| ANAPC7  | NM_001137664 | 61.85585918 | 2.475763762 | 2.99E-06    | 24.98455633  |
| IL4I1   | NM_001258017 | 106.7747767 | 3.221855785 | 1.15E-10    | 33.14076849  |
| DAGLB   | NM_139179    | 124.713002  | 3.445534837 | 8.03E-12    | 36.19554233  |
| SENP3   | NM_015670    | 46.77477667 | 6.204005179 | 0.00364738  | 7.539448361  |
| TPX2    | NM_012112    | 78.73359358 | 1.219731596 | 3.83E-08    | 64.54993362  |
| RABL2B  | NM_001130923 | 112.4890624 | 3.181856771 | 2.29E-11    | 35.35327656  |
| WDR6    | NM_018031    | 89.63191953 | 16.7019094  | 7.93E-05    | 5.366567222  |
| DMTF1   | NM_001142326 | 178.4684708 | 1.833613576 | 8.47E-20    | 97.33156056  |
| VMP1    | NM_030938    | 104.9781248 | 2.093841078 | 3.21E-10    | 50.13662491  |
| NADK2   | NM_001287340 | 26.77477667 | 0.238776718 | 0.002024804 | 112.1331128  |
| CCT7    | NM_006429    | 163.9176338 | 6.230526733 | 3.38E-15    | 26.30879231  |
| VWA9    | NM_001136043 | 112.4890624 | 3.003880803 | 1.46E-11    | 37.44791147  |
| MCEE    | NM_032601    | 89.63191953 | 1.84416655  | 6.96E-10    | 48.60294181  |
| PQLC1   | NM_001146345 | 77.40797988 | 1.181190478 | 5.22E-08    | 65.53386717  |
| RAB3D   | NM_004283    | 89.89704227 | 4.416767344 | 3.47E-08    | 20.35358335  |
| TSPAN14 | NM_001128309 | 100.2651227 | 2.396822314 | 7.01E-10    | 41.83252224  |
| BLOC1S3 | NM_212550    | 89.10167405 | 7.618910067 | 8.66E-07    | 11.69480585  |
| IL22RA1 | NM_021258    | 49.10167405 | 2.213950437 | 8.89E-05    | 22.17830771  |
| PIGM    | NM_145167    | 67.30502215 | 5.735430899 | 1.74E-05    | 11.73495476  |
| CD82    | NM_001024844 | 123.3873883 | 1.896485921 | 7.97E-13    | 65.06106213  |
| DDB2    | NM_001300734 | 81.06049096 | 4.366606059 | 4.67E-07    | 18.56372887  |
| ETFDH   | NM_004453    | 69.63191953 | 1.284489948 | 3.82E-07    | 54.20978157  |
| RNF138  | NM_016271    | 117.9382254 | 2.624630457 | 3.73E-12    | 44.93517366  |
| MEGF6   | NM_001409    | 54.81595977 | 1.287977682 | 4.44E-05    | 42.55971243  |
| ADSS    | NM_001126    | 92.22393965 | 2.022840232 | 2.40E-09    | 45.59131175  |
| PAQR5   | NM_017705    | 73.01930787 | 1.730151973 | 4.25E-07    | 42.20398497  |
| GRHL1   | NM_198182    | 55.61132799 | 0.445099295 | 5.30E-07    | 124.9413977  |
| IER5L   | NM_203434    | 193.2844306 | 33.72675532 | 1.27E-09    | 5.730893137  |
| PARL    | NM_001037639 | 112.4890624 | 1.791819114 | 1.54E-11    | 62.77925126  |
| HPSE    | NM_001098540 | 87.03989941 | 0.810748479 | 1.29E-09    | 107.3574625  |
| RBM8A   | NM_005105    | 118.4684708 | 13.12906921 | 6.78E-08    | 9.023371644  |
| SNRPD2  | NM_177542    | 72.22393965 | 13.85285299 | 0.000409919 | 5.213650912  |
| HPCAL4  | NM_001282397 | 105.5083703 | 1.189203245 | 8.30E-14    | 88.72189906  |
| CNOT4   | NM_001190849 | 124.4478793 | 0.309931906 | 9.59E-16    | 401.5329715  |
| KLF6    | NM_001160124 | 117.9382254 | 10.98978973 | 7.85E-09    | 10.73161801  |
| ASB7    | NM_198243    | 72.75418513 | 0.873607615 | 1.04E-08    | 83.28016368  |



|              |              |             |             |             |             |
|--------------|--------------|-------------|-------------|-------------|-------------|
| VPS51        | NM_013265    | 101.3256137 | 1.714892935 | 6.06E-12    | 59.08567912 |
| 11-Sep       | NM_018243    | 137.6731026 | 1.194181482 | 1.97E-14    | 115.286583  |
| GNL3         | NM_014366    | 107.8352676 | 9.688878461 | 3.87E-08    | 11.12979878 |
| C11orf54     | NM_001286068 | 41.85585918 | 3.36002878  | 0.000463975 | 12.45699425 |
| KDM5C        | NM_004187    | 51.42857143 | 0.843384632 | 2.03E-06    | 60.97878655 |
| C21orf91     | NM_001100421 | 135.0810825 | 2.088682927 | 6.52E-15    | 64.67285233 |
| CDC16        | NM_003903    | 138.4684708 | 1.275292878 | 8.17E-16    | 108.577781  |
| USP34        | NM_014709    | 40.26512274 | 1.354490797 | 0.000180327 | 29.72712907 |
| ZNF92        | NM_001287533 | 112.7541851 | 2.575879642 | 6.18E-12    | 43.77307981 |
| RET          | NM_020975    | 140.5302455 | 0.883745436 | 3.04E-16    | 159.0166576 |
| SMG1         | NM_015092    | 238.4684708 | 1.225112555 | 1.51E-25    | 194.6502547 |
| BMP2K        | NM_198892    | 103.6525111 | 0.712324029 | 8.07E-12    | 145.5131468 |
| SFXN3        | NM_030971    | 81.59073644 | 15.0826181  | 8.80E-05    | 5.40958711  |
| RIF1         | NM_001177663 | 77.20206442 | 1.199503594 | 8.94E-08    | 64.3616783  |
| ANKRD11      | NM_001256182 | 61.85585918 | 3.845915945 | 9.42E-06    | 16.08351822 |
| VKORC1L1     | NM_173517    | 65.71428571 | 1.047300572 | 1.56E-07    | 62.7463476  |
| MTRR         | NM_002454    | 75.87645073 | 0.957624153 | 1.23E-08    | 79.23406115 |
| FAM177A1     | NM_173607    | 149.8970423 | 0.908221933 | 2.83E-18    | 165.0445083 |
| LINC00471    | NR_024079    | 183.6525111 | 5.073006339 | 1.76E-19    | 36.20190846 |
| ENTPD2       | NM_001246    | 81.3256137  | 2.267397576 | 3.74E-09    | 35.86738142 |
| HMG20A       | NM_018200    | 106.7747767 | 0.598144961 | 2.39E-13    | 178.5098656 |
| RELL1        | NM_001085400 | 129.1016741 | 0.97345911  | 5.84E-14    | 132.6215685 |
| ACOX3        | NM_003501    | 61.59073644 | 1.151004099 | 3.69E-06    | 53.51044056 |
| MINK1        | NM_153827    | 173.2844306 | 2.656611574 | 5.42E-18    | 65.22761261 |
| DDAH1        | NM_012137    | 120.7953682 | 0.107399032 | 2.99E-17    | 1124.734236 |
| BECN1        | NM_003766    | 112.4890624 | 1.652888967 | 1.03E-12    | 68.05603077 |
| SLC7A8       | NM_012244    | 121.8558592 | 0.428893885 | 1.20E-16    | 284.1165694 |
| TXLNA        | NM_175852    | 101.3256137 | 8.201306775 | 3.65E-08    | 12.35481326 |
| RFK          | NM_018339    | 157.9382254 | 5.967190273 | 3.39E-15    | 26.46777095 |
| CCAR2        | NR_033902    | 72.75418513 | 4.910602102 | 2.61E-06    | 14.81573616 |
| DDIT4        | NM_019058    | 274.3449216 | 25.3826405  | 8.91E-18    | 10.80836809 |
| GORASP1      | NR_103866    | 75.34620525 | 7.560821759 | 7.43E-06    | 9.965346049 |
| C17orf96     | NM_001130677 | 130.9575332 | 17.25619277 | 2.97E-08    | 7.58901659  |
| TGFBR2       | NM_003242    | 67.30502215 | 2.440177764 | 1.78E-06    | 27.58201601 |
| IQGAP3       | NM_178229    | 58.73359358 | 1.029529009 | 4.10E-06    | 57.04899334 |
| NR2C1        | NM_001032287 | 59.26383906 | 1.740363566 | 6.76E-06    | 34.05256248 |
| SPG11        | NM_025137    | 116.9369417 | 2.28073551  | 1.66E-11    | 51.27159251 |
| COX14        | NM_001257133 | 76.14157347 | 5.603636387 | 1.55E-06    | 13.58788619 |
| ATIC         | NM_004044    | 117.6731026 | 1.915385752 | 1.37E-12    | 61.43571993 |
| LOC100652758 | NM_001278082 | 127.5701449 | 29.44895637 | 2.72E-05    | 4.331907158 |
| CPSF4        | NM_001081559 | 118.9987163 | 7.794759861 | 2.82E-10    | 15.26650191 |
| ERF          | NM_006494    | 146.2445312 | 18.57597843 | 5.32E-09    | 7.872776754 |
| SH3RF2       | NM_152550    | 58.73359358 | 1.349454607 | 1.19E-05    | 43.52394905 |
| RDH13        | NR_027382    | 115.3462052 | 8.22958392  | 7.22E-09    | 14.01604338 |
| RPS15        | NM_001018    | 146.2445312 | 12.45696488 | 2.85E-10    | 11.73998101 |
| RPS6KB2      | NM_003952    | 96.14157347 | 0.335332335 | 1.37E-14    | 286.7053468 |
| ZKSCAN5      | NM_014569    | 52.22393965 | 1.771723242 | 4.25E-05    | 29.47635298 |
| SMOX         | NM_175841    | 127.0398994 | 3.775314538 | 9.80E-12    | 33.65014971 |
| MFSD8        | NM_152778    | 47.03989941 | 2.297760769 | 0.000286281 | 20.47206134 |
| SH3TC1       | NM_018986    | 49.36679679 | 1.27988077  | 9.18E-05    | 38.57140287 |
| ALG1         | NM_019109    | 143.9176338 | 3.36023826  | 2.62E-15    | 42.82959204 |
| HSF2         | NM_004506    | 75.61132799 | 1.14045279  | 5.04E-08    | 66.29939324 |
| PHRF1        | NM_001286583 | 66.24453119 | 4.554381712 | 1.91E-05    | 14.54523037 |
| CCDC107      | NM_174923    | 114.3449216 | 15.75602618 | 4.24E-07    | 7.2572183   |
| ZMYND12      | NM_032257    | 60.79536822 | 0.364832092 | 9.48E-09    | 166.6393103 |
| CENPN        | NM_018455    | 132.4890624 | 8.591664821 | 1.04E-10    | 15.42065073 |
| GAD1         | NM_013445    | 64.97812478 | 2.271674736 | 1.17E-06    | 28.6036217  |
| FGF7         | NM_002009    | 28.83655131 | 0.189951187 | 0.000823879 | 151.8103245 |
| ZMYM2        | NM_001190965 | 100.2651227 | 1.605242459 | 9.62E-10    | 62.46104578 |
| LOC100129518 | NR_037166    | 118.4684708 | 19.30458602 | 2.21E-06    | 6.136804525 |
| RAB5A        | NM_004162    | 120.5302455 | 0.702201436 | 1.09E-14    | 171.6462531 |
| NOMO2        | NM_001004060 | 196.4066962 | 2.104203569 | 4.20E-21    | 93.34015925 |
| NDUFAF1      | NM_016013    | 133.5495533 | 2.005450855 | 2.40E-15    | 66.59328151 |
| PDDC1        | NM_182612    | 105.7142857 | 9.027455757 | 2.14E-08    | 11.71030782 |

|              |              |             |             |             |             |
|--------------|--------------|-------------|-------------|-------------|-------------|
| TMEM18       | NM_152834    | 92.48906239 | 3.572251876 | 2.04E-09    | 25.89096895 |
| ANKRD27      | NM_032139    | 50.69241049 | 1.816191257 | 8.25E-05    | 27.91138339 |
| TMEM120A     | NM_031925    | 66.77477667 | 4.07347958  | 2.96E-06    | 16.39256448 |
| LSM14A       | NM_001114093 | 101.060491  | 1.661958298 | 2.82E-10    | 60.8080787  |
| PTRH2        | NM_016077    | 84.97812478 | 12.38923518 | 1.34E-05    | 6.859029112 |
| POP7         | NM_005837    | 118.4684708 | 5.734507674 | 2.19E-09    | 20.65887389 |
| ALDH2        | NM_000690    | 131.4285714 | 1.365435875 | 1.06E-14    | 96.25393167 |
| GUSBP11      | NR_024448    | 138.2033481 | 2.538793137 | 9.92E-14    | 54.43663214 |
| MIR22HG      | NR_028505    | 80.79536822 | 11.0685009  | 4.79E-05    | 7.299576423 |
| BTBD1        | NM_025238    | 113.0193079 | 2.443974444 | 1.20E-11    | 46.24406288 |
| MBTPS2       | NM_015884    | 100.5302455 | 0.515224775 | 1.83E-13    | 195.119199  |
| STAM-AS1     | NR_110370    | 76.14157347 | 3.096414317 | 5.64E-08    | 24.59024074 |
| COPE         | NM_199442    | 129.8970423 | 1.936552825 | 3.69E-15    | 67.07642601 |
| UNC93B1      | NM_030930    | 72.48906239 | 5.24305528  | 2.23E-06    | 13.82572918 |
| HMCES        | NM_020187    | 123.3873883 | 1.462678468 | 2.20E-14    | 84.35715095 |
| CHRAC1       | NM_017444    | 176.4066962 | 27.51324098 | 8.98E-10    | 6.411701781 |
| ASCC2        | NM_001242906 | 113.2844306 | 2.202609739 | 9.04E-12    | 51.43191215 |
| ZNF148       | NM_021964    | 68.83655131 | 0.398283132 | 4.15E-08    | 172.8332079 |
| SLC18B1      | NM_052831    | 158.9987163 | 1.764136107 | 1.03E-18    | 90.1283726  |
| AHNAK2       | NM_138420    | 57.67310262 | 5.315081344 | 0.000143934 | 10.85084101 |
| FAM83F       | NM_138435    | 98.46847084 | 0.648189798 | 9.44E-12    | 151.9130217 |
| C12orf66     | NM_152440    | 103.6525111 | 1.40580816  | 1.33E-11    | 73.7316186  |
| HIATL2       | NR_002894    | 66.50965393 | 1.06223003  | 1.18E-07    | 62.6132307  |
| ARMC1        | NM_001286702 | 168.6306359 | 1.661775847 | 8.47E-20    | 101.4761624 |
| ZBTB8A       | NR_111980    | 43.91763382 | 1.265801102 | 0.000503255 | 34.69552503 |
| FCHO2        | NM_138782    | 72.48906239 | 0.056683182 | 9.44E-11    | 1278.846022 |
| PRRC1        | NM_130809    | 120.2651227 | 1.324395084 | 1.54E-13    | 90.80758768 |
| HOXA13       | NM_000522    | 37.40797988 | 2.572157362 | 0.001420846 | 14.54342586 |
| MAN2C1       | NM_001256496 | 224.4478793 | 9.500104285 | 1.72E-20    | 23.62583321 |
| CEP68        | NM_015147    | 89.89704227 | 6.187324424 | 1.11E-07    | 14.52922719 |
| TMEM8B       | NM_016446    | 74.81595977 | 2.338478316 | 5.94E-08    | 31.99343747 |
| PDPK1        | NM_031268    | 41.06049096 | 1.070659875 | 0.000114173 | 38.35063955 |
| BIRC5        | NM_001012271 | 114.0797988 | 5.094189578 | 1.23E-10    | 22.39410157 |
| ZNF622       | NM_033414    | 124.1827566 | 3.239916267 | 5.52E-13    | 38.32900184 |
| D2HGDH       | NM_001287249 | 186.2445312 | 2.813694653 | 2.95E-19    | 66.19216162 |
| STEAP3       | NM_001008410 | 176.4066962 | 3.896735523 | 3.01E-17    | 45.27037956 |
| RNF181       | NM_016494    | 92.22393965 | 12.95670138 | 1.60E-05    | 7.117856385 |
| ZNF749       | NM_001023561 | 94.81595977 | 0.610702886 | 1.10E-13    | 155.2571011 |
| SCFD2        | NM_152540    | 27.03989941 | 0.054667166 | 0.003332421 | 494.6277919 |
| SLC25A40     | NM_018843    | 106.5096539 | 0.632352439 | 9.58E-13    | 168.434005  |
| PRR13        | NM_018457    | 135.3462052 | 11.91707486 | 4.06E-10    | 11.35733449 |
| ZNF428       | NM_182498    | 145.773493  | 8.16615987  | 1.30E-12    | 17.85092324 |
| C7orf60      | NM_152556    | 94.81595977 | 0.621722288 | 4.81E-11    | 152.5053253 |
| P4HB         | NM_000918    | 133.2844306 | 7.19752644  | 6.30E-12    | 18.51808836 |
| SHMT1        | NM_004169    | 92.48906239 | 1.791268678 | 1.21E-09    | 51.63327172 |
| ELOVL7       | NM_024930    | 133.2844306 | 1.04203071  | 3.09E-14    | 127.9083517 |
| TMEM126A     | NM_032273    | 78.46847084 | 3.117373947 | 7.36E-08    | 25.17133722 |
| HES2         | NM_019089    | 140.7953682 | 10.20596658 | 3.70E-11    | 13.79539773 |
| SRSF7        | NM_001031684 | 169.6319195 | 14.55118231 | 9.35E-13    | 11.65760389 |
| CXCL1        | NM_001511    | 95.34620525 | 12.99871403 | 1.96E-05    | 7.335049069 |
| FBL          | NM_001436    | 140.2651227 | 6.556468489 | 2.13E-12    | 21.39339539 |
| HDAC11       | NM_001136041 | 77.40797988 | 3.199667898 | 9.09E-08    | 24.19250446 |
| TCEA1        | NM_201437    | 52.22393965 | 1.343770071 | 5.83E-05    | 38.8637467  |
| CA2          | NM_000067    | 95.87645073 | 3.020755642 | 1.45E-09    | 31.73922756 |
| LOC100288069 | NR_033908    | 94.81595977 | 0.315645649 | 2.55E-14    | 300.387349  |
| NDUFS3       | NM_004551    | 164.4478793 | 4.229417143 | 8.41E-18    | 38.8819248  |
| YWHAE        | NR_024058    | 123.9176338 | 3.659572611 | 3.58E-11    | 33.86123108 |
| EPHX1        | NM_001136018 | 55.34620525 | 2.341432948 | 3.06E-05    | 23.6377494  |
| ERI2         | NM_080663    | 147.8352676 | 0.739759903 | 8.50E-20    | 199.8422285 |
| PMS2P1       | NR_003613    | 200.2651227 | 5.027563828 | 1.71E-20    | 39.83343217 |
| FIBP         | NM_004214    | 166.5096539 | 11.8446763  | 3.38E-13    | 14.05776315 |
| HOMER1       | NM_001277077 | 57.67310262 | 0.221822025 | 4.03E-07    | 259.9971878 |
| RAN          | NM_001300796 | 102.8571429 | 8.886693242 | 4.65E-08    | 11.57428754 |
| ZADH2        | NM_175907    | 57.93822536 | 1.597189851 | 2.02E-06    | 36.27510237 |

|               |              |             |             |             |             |
|---------------|--------------|-------------|-------------|-------------|-------------|
| TRAF2         | NM_021138    | 40          | 2.732197597 | 0.001088362 | 14.64022955 |
| WBP5          | NM_016303    | 61.06049096 | 5.037595057 | 0.000106865 | 12.12096055 |
| DYNLT1        | NM_006519    | 109.8970423 | 9.228416753 | 3.25E-08    | 11.90854783 |
| KCTD7         | NM_001167961 | 69.63191953 | 3.425067593 | 2.88E-06    | 20.33008624 |
| ADAM19        | NM_033274    | 81.59073644 | 0.958111101 | 1.68E-09    | 85.15790743 |
| SDR42E1       | NM_145168    | 144.713002  | 1.489995362 | 4.91E-18    | 97.12312247 |
| JMJD6         | NM_015167    | 92.48906239 | 7.272742938 | 3.11E-07    | 12.71721869 |
| CRTAP         | NM_006371    | 114.550837  | 2.006311171 | 2.44E-12    | 57.09524958 |
| YIF1B         | NM_001145463 | 63.1222656  | 14.69080402 | 0.003987591 | 4.296719602 |
| ACOXL         | NM_001142807 | 106.5096539 | 0.328766649 | 6.46E-12    | 323.967331  |
| PARP3         | NM_005485    | 107.0398994 | 6.72056109  | 3.01E-09    | 15.92722661 |
| PIP5K1A       | NM_003557    | 132.4890624 | 2.671901942 | 1.73E-13    | 49.58604967 |
| CDC7          | NM_003503    | 122.1209819 | 2.432401014 | 1.45E-13    | 50.20594104 |
| LACTB2        | NM_016027    | 186.7747767 | 0.333391995 | 1.78E-27    | 560.2257389 |
| ABI2          | NM_001282925 | 104.9781248 | 0.808546992 | 2.65E-12    | 129.835527  |
| PCM1          | NM_006197    | 81.59073644 | 0.749887543 | 1.29E-09    | 108.8039629 |
| UIMC1         | NM_001199297 | 129.1016741 | 0.958752647 | 7.19E-15    | 134.6558724 |
| CSK           | NM_004383    | 60.26512274 | 1.931827593 | 3.18E-06    | 31.19591155 |
| CBLC          | NM_001130852 | 117.7323099 | 6.602506928 | 6.12E-10    | 17.83145572 |
| LOC101929099  | NR_110786    | 35.08108251 | 0.320320387 | 0.000117095 | 109.5187316 |
| IL17RA        | NM_001289905 | 104.1827566 | 4.186149671 | 2.21E-09    | 24.88748964 |
| LOXL2         | NM_002318    | 111.9588169 | 0.620627924 | 2.67E-13    | 180.3960353 |
| DFNB59        | NM_001042702 | 81.59073644 | 0.706471556 | 1.51E-11    | 115.4904762 |
| YIF1A         | NM_020470    | 126.7747767 | 7.471785009 | 9.92E-11    | 16.96713389 |
| WIBG          | NM_001143853 | 66.50965393 | 0.956314044 | 2.34E-07    | 69.54792137 |
| HNRNPD        | NM_031369    | 74.07979883 | 3.797160653 | 1.31E-06    | 19.50926116 |
| CFAP61        | NM_015585    | 25.24324752 | 0.028961006 | 0.001596169 | 871.6288265 |
| RPL23AP7      | NR_024528    | 101.5907364 | 1.658226743 | 2.41E-12    | 61.26468341 |
| NDUFAF7       | NM_144736    | 109.8970423 | 2.493492887 | 3.09E-11    | 44.0735335  |
| CGGBP1        | NM_001008390 | 124.1827566 | 2.642341219 | 6.60E-14    | 46.99724458 |
| KBTBD2        | NM_015483    | 83.1222656  | 3.494411071 | 1.65E-07    | 23.78720303 |
| ZSWIM8        | NM_015037    | 52.48906239 | 6.207500897 | 0.001398203 | 8.455747853 |
| LOC100294362  | NR_029376    | 99.26383906 | 0.239116263 | 2.90E-14    | 415.1279286 |
| OSGEP         | NM_017807    | 67.30502215 | 7.684245513 | 7.78E-05    | 8.758832866 |
| SYNJ2BP-COX16 | NM_001202547 | 83.38738834 | 1.700110788 | 4.60E-08    | 49.04820847 |
| H2AFJ         | NM_177925    | 78.2033481  | 2.885240154 | 2.96E-08    | 27.10462351 |
| THRB          | NM_000461    | 61.59073644 | 0.165398024 | 2.18E-07    | 372.3789142 |
| MED21         | NM_001271811 | 95.61132799 | 1.452390036 | 1.44E-11    | 65.83033871 |
| RHBDD3        | NM_012265    | 95.87645073 | 13.04393389 | 3.10E-06    | 7.350271134 |
| DPP9          | NM_139159    | 67.30502215 | 3.325229245 | 1.51E-06    | 20.24071641 |
| TMEM39B       | NM_018056    | 166.7747767 | 0.089442381 | 2.41E-27    | 1864.605734 |
| ARL6          | NM_177976    | 31.22265597 | 0.522654074 | 0.000487769 | 59.73866376 |
| TUBGCP3       | NM_001286277 | 132.7541851 | 1.264012729 | 1.57E-13    | 105.0259875 |
| DUSP1         | NM_004417    | 226.7747767 | 17.71665081 | 1.02E-16    | 12.80009293 |
| UBAP2         | NM_001282529 | 156.1415735 | 2.18204463  | 1.41E-15    | 71.55746097 |
| TCF7L1        | NM_031283    | 43.1222656  | 1.776520374 | 0.000714246 | 24.27344275 |
| WNT7B         | NM_058238    | 97.93822536 | 1.130739564 | 2.58E-10    | 86.61430846 |
| RCC2          | NM_001136204 | 63.65251108 | 2.30555148  | 3.17E-06    | 27.60836686 |
| DSG2          | NM_001943    | 105.7142857 | 1.637137002 | 4.63E-11    | 64.57265677 |
| STAT1         | NM_007315    | 141.8558592 | 3.392391107 | 1.48E-13    | 41.81589172 |
| GALK2         | NM_001289030 | 69.63191953 | 0.13324235  | 4.75E-09    | 522.5960048 |
| SNAP47        | NM_053052    | 158.4684708 | 2.536881127 | 1.26E-16    | 62.46586376 |
| MAST2         | NM_015112    | 71.69369417 | 0.367169412 | 3.17E-08    | 195.2605306 |
| AGTRAP        | NM_001040195 | 103.9176338 | 6.582978772 | 8.89E-09    | 15.78580722 |
| VANGL1        | NM_001172411 | 111.9588169 | 1.453924192 | 9.30E-12    | 77.00457664 |
| SNF8          | NM_007241    | 153.0193079 | 14.12590348 | 3.09E-11    | 10.83253245 |
| USP20         | NM_006676    | 63.91763382 | 1.43359896  | 2.85E-06    | 44.5854354  |
| CDKL1         | NM_001282236 | 33.28443061 | 1.677044978 | 0.004012704 | 19.84707091 |
| STRADB        | NM_001206864 | 115.611328  | 0.245673569 | 9.53E-17    | 470.5891987 |
| XRCC5         | NM_021141    | 84.4478793  | 2.399161958 | 3.23E-08    | 35.19890728 |
| PIAS1         | NM_016166    | 55.34620525 | 1.62546455  | 4.97E-05    | 34.04946927 |
| SLC50A1       | NM_001122837 | 198.9987163 | 28.15725564 | 3.65E-11    | 7.06740454  |
| DCTN5         | NM_001199743 | 75.87645073 | 3.596023195 | 1.03E-06    | 21.10010047 |
| DSCC1         | NM_024094    | 162.1209819 | 4.608391498 | 1.95E-16    | 35.17951589 |

|              |              |             |             |             |             |
|--------------|--------------|-------------|-------------|-------------|-------------|
| PTBP3        | NM_001244898 | 60.79536822 | 0.922279216 | 8.11E-07    | 65.91861466 |
| CILP2        | NM_153221    | 97.67310262 | 8.254921065 | 9.68E-08    | 11.83210619 |
| PAQR8        | NM_133367    | 160.7953682 | 2.349130467 | 4.12E-17    | 68.448888   |
| SENPI        | NR_051992    | 104.4478793 | 0.731996274 | 4.32E-13    | 142.689086  |
| NUDT9        | NM_001248011 | 60.79536822 | 2.002583647 | 6.59E-06    | 30.35846634 |
| OPTN         | NM_001008212 | 75.61132799 | 1.400375672 | 9.74E-08    | 53.99360292 |
| SNHG16       | NR_038111    | 136.9369417 | 12.78911005 | 2.42E-10    | 10.7073081  |
| WIP1         | NM_017983    | 131.9588169 | 3.442060961 | 1.60E-12    | 38.33715277 |
| CDC42EP4     | NM_012121    | 181.060491  | 8.816287139 | 4.25E-15    | 20.5370456  |
| KAT2B        | NM_003884    | 60.79536822 | 1.17044934  | 9.58E-07    | 51.94190482 |
| DNAJC11      | NM_018198    | 57.93822536 | 1.413713039 | 1.68E-05    | 40.9830169  |
| TBC1D15      | NM_022771    | 100.7953682 | 0.187055456 | 3.86E-14    | 538.8528631 |
| ZNF75D       | NM_007131    | 30.16216501 | 0.891907164 | 0.000953963 | 33.81760593 |
| PRPS2        | NM_002765    | 69.36679679 | 1.998788216 | 6.25E-07    | 34.70442553 |
| CD164L2      | NM_207397    | 66.50965393 | 5.205894884 | 2.87E-05    | 12.77583497 |
| CHCHD1       | NM_203298    | 97.93822536 | 8.149060326 | 1.42E-06    | 12.01834585 |
| MRPL19       | NM_014763    | 61.06049096 | 2.49339738  | 2.95E-06    | 24.48887267 |
| UPF1         | NM_002911    | 172.2239396 | 2.266483273 | 4.93E-19    | 75.98729791 |
| COL4A4       | NM_000092    | 50.42728775 | 1.478127605 | 9.83E-05    | 34.11565252 |
| GCLC         | NM_001197115 | 138.9987163 | 1.958963667 | 5.85E-15    | 70.95522938 |
| ZNF503-AS2   | NR_110302    | 49.36679679 | 9.017587095 | 0.004601697 | 5.474501801 |
| UBL3         | NM_007106    | 95.08108251 | 0.443142915 | 7.53E-12    | 214.5607643 |
| FLYWCH1      | NM_032296    | 109.1016741 | 3.03472535  | 4.71E-11    | 35.95108666 |
| ELMOD3       | NM_001135023 | 63.38738834 | 2.850794578 | 4.44E-06    | 22.23498979 |
| HEXDC        | NM_173620    | 203.6525111 | 6.189881148 | 3.04E-19    | 32.90087583 |
| HUWE1        | NM_031407    | 108.8365513 | 1.545275733 | 1.37E-10    | 70.43179998 |
| RGCC         | NM_014059    | 83.65251108 | 3.099700166 | 4.36E-08    | 26.98729122 |
| TMEM185A     | NM_001282302 | 63.1222656  | 1.302145377 | 1.21E-06    | 48.47559015 |
| MYH14        | NM_001077186 | 95.34620525 | 0.957593714 | 8.96E-11    | 99.56853706 |
| N4BP1        | NM_153029    | 51.69369417 | 0.730475442 | 4.21E-06    | 70.76718968 |
| DSC3         | NM_024423    | 35.61132799 | 0.595748609 | 0.000333882 | 59.77576353 |
| MBD2         | NM_015832    | 63.1222656  | 2.652098802 | 2.44E-06    | 23.80087256 |
| IPO7         | NM_006391    | 107.0398994 | 3.17385816  | 2.26E-10    | 33.725483   |
| SGSH         | NM_000199    | 132.7541851 | 4.087695477 | 3.52E-13    | 32.47653498 |
| PRORS1P      | NR_027258    | 72.75418513 | 4.2919288   | 2.50E-06    | 16.9513961  |
| PEX16        | NM_004813    | 92.22393965 | 4.252046883 | 1.67E-08    | 21.68930451 |
| COX7A2       | NR_029466    | 89.10167405 | 7.619900734 | 3.62E-07    | 11.69328541 |
| AKAP11       | NM_016248    | 60.79536822 | 1.180654255 | 5.37E-06    | 51.49294805 |
| ZNF488       | NM_153034    | 95.87645073 | 0.975990495 | 3.55E-12    | 98.23502506 |
| ZNF564       | NM_144976    | 152.4890624 | 1.189537726 | 7.49E-19    | 128.1918674 |
| SMYD4        | NM_052928    | 226.5096539 | 1.354125571 | 1.31E-26    | 167.2737438 |
| KIF23        | NM_004856    | 59.26383906 | 2.494583417 | 7.56E-06    | 23.75700835 |
| ATG16L1      | NM_001190266 | 80.79536822 | 2.669283198 | 6.90E-08    | 30.26856359 |
| NRGN         | NM_006176    | 71.95881691 | 8.838340052 | 4.20E-05    | 8.141666476 |
| THOC1        | NM_005131    | 61.3256137  | 1.098379358 | 5.16E-06    | 55.83281703 |
| LOC101928784 | NR_120339    | 90.16216501 | 0.441992436 | 3.25E-12    | 203.9902894 |
| QARS         | NM_005051    | 86.24453119 | 6.186620447 | 2.34E-07    | 13.94049173 |
| CRIP1        | NM_014171    | 57.93822536 | 0.374998681 | 9.30E-08    | 154.5024778 |
| DNASE2       | NM_001375    | 115.611328  | 6.223413339 | 1.72E-10    | 18.57683584 |
| TMX3         | NM_019022    | 78.2033481  | 0.753811298 | 8.48E-10    | 103.7439321 |
| CNOT2        | NM_001199303 | 46.24453119 | 0.222273643 | 9.19E-06    | 208.0522482 |
| TTC19        | NM_017775    | 133.0193079 | 4.616721202 | 9.93E-13    | 28.81250611 |
| SRSF5        | NM_001039465 | 147.8352676 | 12.41254513 | 4.46E-11    | 11.91014946 |
| COQ2         | NM_015697    | 106.7747767 | 1.892370397 | 4.72E-12    | 56.42382528 |
| DVL2         | NM_004422    | 152.7541851 | 7.042452576 | 4.43E-14    | 21.69048119 |
| CEP83        | NM_001042399 | 113.0193079 | 0.303013052 | 3.22E-14    | 372.984949  |
| CENPBD1      | NM_145039    | 181.3256137 | 6.076591751 | 1.70E-17    | 29.84001907 |
| RAB7A        | NM_004637    | 132.2239396 | 1.775611368 | 2.48E-13    | 74.46671159 |
| KLHL25       | NM_022480    | 78.73359358 | 2.230630609 | 4.07E-08    | 35.2965629  |
| ZBTB10       | NM_023929    | 69.89704227 | 2.083142896 | 8.46E-07    | 33.55364742 |
| WDR78        | NM_207014    | 60.79536822 | 0.247659118 | 8.58E-08    | 245.4800319 |
| ITPRIPL2     | NM_001034841 | 100.7953682 | 9.078910569 | 2.11E-07    | 11.10214353 |
| STARD8       | NM_014725    | 55.34620525 | 0.340958228 | 7.63E-07    | 162.3254719 |
| KIAA1467     | NM_020853    | 69.63191953 | 1.361369018 | 4.65E-07    | 51.14845322 |

|            |              |             |             |             |             |
|------------|--------------|-------------|-------------|-------------|-------------|
| IKBKAP     | NM_003640    | 61.3256137  | 1.410669893 | 8.21E-06    | 43.47268912 |
| SLC25A25   | NM_001006641 | 132.2239396 | 2.733384839 | 1.03E-13    | 48.37370053 |
| ZNF292     | NM_015021    | 87.83526763 | 0.593381192 | 1.69E-10    | 148.025028  |
| PTTG1      | NM_001282383 | 89.63191953 | 1.858747756 | 1.49E-10    | 48.22166925 |
| PDK1       | NR_103729    | 73.01930787 | 1.607878103 | 1.50E-07    | 45.41345996 |
| OPA1       | NM_130834    | 116.9369417 | 0.582681925 | 3.92E-14    | 200.6874362 |
| MKRN2      | NM_001271707 | 232.2239396 | 2.416431406 | 2.51E-26    | 96.10202013 |
| CD55       | NR_125349    | 49.36679679 | 1.049573637 | 7.27E-05    | 47.03509603 |
| ACVR1B     | NM_020328    | 52.75418513 | 1.700354688 | 5.94E-05    | 31.02540046 |
| GSTT2      | NM_000854    | 241.5907364 | 37.63971644 | 8.38E-13    | 6.418505752 |
| HBS1L      | NM_001145158 | 86.50965393 | 0.728149726 | 4.45E-10    | 118.8075074 |
| C1orf53    | NM_001024594 | 107.3050222 | 14.2915022  | 3.63E-07    | 7.508309528 |
| ADK        | NM_001123    | 118.2033481 | 0.100520746 | 2.52E-14    | 1175.909982 |
| TXNRD2     | NM_006440    | 97.93822536 | 1.037534438 | 3.10E-10    | 94.39515623 |
| NR2C2      | NM_001291694 | 35.34620525 | 1.840720276 | 0.004409316 | 19.2023773  |
| STYXL1     | NM_016086    | 126.7747767 | 3.506984001 | 1.47E-11    | 36.14923155 |
| FADS2      | NM_001281502 | 53.28443061 | 3.098798702 | 4.41E-05    | 17.1951894  |
| GPATCH2    | NM_018040    | 166.7747767 | 0.09243453  | 5.82E-24    | 1804.247571 |
| CCNDBP1    | NR_045999    | 94.55083703 | 4.068218454 | 2.48E-09    | 23.24133723 |
| PNN        | NM_002687    | 101.3256137 | 8.328821812 | 4.26E-08    | 12.16565992 |
| PUS7       | NM_019042    | 220.5302455 | 2.143271645 | 1.17E-23    | 102.8942113 |
| KIAA1715   | NM_030650    | 186.5096539 | 0.556683043 | 2.50E-24    | 335.0374259 |
| SLC25A27   | NM_004277    | 75.87645073 | 2.261722578 | 4.90E-08    | 33.54808033 |
| NOC3L      | NM_022451    | 103.9176338 | 0.595974135 | 5.04E-13    | 174.3660131 |
| EFTUD2     | NM_001258353 | 70.69241049 | 1.55854004  | 3.63E-07    | 45.35809711 |
| DNAJC9-AS1 | NR_038373    | 146.2445312 | 8.167141609 | 1.67E-12    | 17.90645224 |
| ZNF121     | NM_001008727 | 130.4272878 | 1.467565022 | 2.48E-16    | 88.87325999 |
| DDX19A     | NM_018332    | 82.6512274  | 2.321947929 | 1.20E-08    | 35.59564208 |
| CLTB       | NR_045724    | 73.54955335 | 0.621788124 | 4.27E-09    | 118.2871633 |
| URB1       | NM_014825    | 126.7747767 | 3.046754847 | 2.35E-12    | 41.60977271 |
| TIMM23B    | NM_001290117 | 112.2239396 | 1.318560021 | 7.49E-12    | 85.11098311 |
| NSMCE2     | NM_173685    | 72.48906239 | 0.864272497 | 7.72E-08    | 83.87292507 |
| ARMC9      | NM_001291656 | 81.85585918 | 0.388736134 | 6.71E-10    | 210.5692065 |
| NR6A1      | NM_001489    | 123.1222656 | 1.61661362  | 8.11E-12    | 76.16060143 |
| CYTH3      | NM_004227    | 45.71428571 | 0.930310797 | 3.16E-05    | 49.13872426 |
| SUPT7L     | NM_001282730 | 191.9588169 | 2.421345604 | 1.76E-22    | 79.27774399 |
| NMRAL1     | NM_020677    | 67.83526763 | 9.443155638 | 0.000144962 | 7.183538028 |
| RPS24      | NM_001142284 | 93.28443061 | 13.0311853  | 4.69E-06    | 7.158553001 |
| MED22      | NM_181491    | 69.36679679 | 11.50473957 | 0.00033514  | 6.029410431 |
| SUZ12      | NM_015355    | 112.4890624 | 2.062021738 | 2.78E-11    | 54.55280142 |
| DHX36      | NM_001114397 | 67.03989941 | 1.164643424 | 1.12E-06    | 57.56259643 |
| CD274      | NM_001267706 | 70.42728775 | 0.626037537 | 5.74E-09    | 112.4969089 |
| RBM12      | NM_006047    | 146.5096539 | 6.131522411 | 1.54E-13    | 23.89449864 |
| ITGA7      | NM_001144996 | 29.36679679 | 0.525162557 | 0.000823879 | 55.91944129 |
| C11orf30   | NM_001300943 | 52.75418513 | 0.354963591 | 2.95E-06    | 148.6185807 |
| ZNF507     | NM_001136156 | 59.26383906 | 0.672090704 | 1.40E-07    | 88.17833467 |
| NOL8       | NM_017948    | 153.8146761 | 3.93544471  | 2.88E-15    | 39.08444596 |
| CENPE      | NM_001286734 | 96.67181894 | 0.431970587 | 3.71E-12    | 223.7925958 |
| IARS       | NM_013417    | 75.34620525 | 2.206899524 | 4.19E-07    | 34.14120328 |
| CDADC1     | NR_036439    | 109.1016741 | 0.328444993 | 1.34E-15    | 332.1763963 |
| DERL1      | NM_024295    | 88.10039037 | 0.615691805 | 6.36E-11    | 143.0917055 |
| YPEL2      | NM_001005404 | 49.10167405 | 1.530560669 | 0.000143555 | 32.08084139 |
| IER5       | NM_016545    | 135.0810825 | 19.53776665 | 1.77E-07    | 6.913844604 |
| NTPCR      | NM_032324    | 47.30502215 | 0.335783681 | 6.04E-07    | 140.8794556 |
| TMEM132A   | NM_017870    | 109.3667968 | 2.639298037 | 1.16E-11    | 41.43783508 |
| WDYHV1     | NM_001283027 | 157.9382254 | 2.12089838  | 3.10E-18    | 74.46760619 |
| ABHD14A    | NM_015407    | 160.7953682 | 5.611077958 | 7.43E-16    | 28.6567696  |
| TRDMT1     | NM_004412    | 51.95881691 | 2.347495834 | 8.18E-05    | 22.1337206  |
| CREB1      | NM_134442    | 188.8365513 | 1.312683748 | 1.08E-20    | 143.8553281 |
| TRAPPC2L   | NM_016209    | 144.1827566 | 3.939080556 | 1.01E-14    | 36.60315003 |
| SESN2      | NM_031459    | 163.9176338 | 2.615186062 | 1.49E-17    | 62.67914785 |
| PKMYT1     | NM_182687    | 104.1827566 | 14.70689477 | 3.35E-06    | 7.083939758 |
| MISP       | NM_173481    | 89.63191953 | 3.101223108 | 8.12E-09    | 28.90211907 |
| GPR160     | NM_014373    | 83.65251108 | 1.022543768 | 7.25E-09    | 81.80824499 |

|              |              |             |             |             |             |
|--------------|--------------|-------------|-------------|-------------|-------------|
| LOC101927221 | NR_125415    | 173.2844306 | 3.257329054 | 4.58E-19    | 53.19831916 |
| URM1         | NM_001135947 | 94.81595977 | 1.530566372 | 6.97E-11    | 61.94828365 |
| RAB30-AS1    | NR_038903    | 104.1827566 | 7.858454905 | 2.70E-07    | 13.25740973 |
| NR2C2AP      | NM_176880    | 92.48906239 | 10.60944762 | 3.07E-06    | 8.717613365 |
| ATXN2L       | NM_145714    | 69.36679679 | 8.842699123 | 0.00014574  | 7.844527539 |
| FZD6         | NM_001164616 | 78.46847084 | 1.078572987 | 1.94E-08    | 72.75211953 |
| AGGF1        | NM_018046    | 78.46847084 | 0.814718417 | 1.03E-08    | 96.3136087  |
| MTX1         | NM_198883    | 58.2033481  | 8.313605537 | 0.00068545  | 7.00097543  |
| RBL2         | NM_005611    | 55.61132799 | 0.52942277  | 9.06E-07    | 105.041436  |
| CAPZA1       | NM_006135    | 83.38738834 | 1.631579657 | 2.15E-08    | 51.10837707 |
| ATP6V0A1     | NM_001130020 | 129.8970423 | 3.128578832 | 8.09E-13    | 41.5195043  |
| LOC729970    | NR_033998    | 29.36679679 | 1.005013554 | 0.001720332 | 29.22029926 |
| CHRN1        | NM_000747    | 47.30502215 | 7.019969809 | 0.002385332 | 6.738636125 |
| CTH          | NM_001190463 | 101.060491  | 1.69277189  | 5.14E-11    | 59.70118688 |
| TCTEX1D2     | NM_152773    | 112.2239396 | 1.972260033 | 2.57E-12    | 56.90118837 |
| VWA3B        | NM_144992    | 40.53024548 | 0.438633331 | 0.00013333  | 92.40119839 |
| TELO2        | NM_016111    | 117.9382254 | 0.922610896 | 2.04E-15    | 127.8309479 |
| PLA2G4A      | NM_024420    | 54.81595977 | 0.131955562 | 4.85E-07    | 415.4122712 |
| PRRT3-AS1    | NR_046734    | 81.06049096 | 1.142695183 | 7.27E-10    | 70.93798257 |
| LOC374443    | NR_002814    | 66.50965393 | 1.651906743 | 1.03E-07    | 40.26235392 |
| OAS3         | NM_006187    | 78.46847084 | 0.399865516 | 7.41E-11    | 196.2371542 |
| FIRRE        | NR_026975    | 35.34620525 | 0.187112086 | 0.000266886 | 188.9039129 |
| ARRDC3-AS1   | NR_027435    | 68.10039037 | 4.426328176 | 1.05E-05    | 15.38530079 |
| LYPD6        | NM_001195685 | 132.7541851 | 1.153631937 | 2.80E-13    | 115.0749913 |
| SLC25A42     | NM_178526    | 52.22393965 | 1.427916661 | 5.55E-05    | 36.57352077 |
| MRPL38       | NM_032478    | 95.61132799 | 10.16714632 | 7.47E-07    | 9.403949251 |
| PTPLA        | NM_014241    | 159.2638391 | 0.660518462 | 1.03E-21    | 241.119436  |
| ZNF565       | NM_152477    | 70.69241049 | 0.96617087  | 7.45E-08    | 73.167607   |
| ATP6V0A2     | NM_012463    | 122.1209819 | 1.420108904 | 2.51E-13    | 85.99409635 |
| VCAN         | NM_001126336 | 29.89704227 | 0.900763553 | 0.002400129 | 33.19077706 |
| DENND5B-AS1  | NR_046909    | 61.06049096 | 1.695752017 | 3.52E-06    | 36.00791292 |
| LTBR         | NM_002342    | 97.93822536 | 10.16980141 | 5.12E-07    | 9.630298702 |
| PRDM1        | NM_001198    | 58.99871632 | 0.708776812 | 6.50E-07    | 83.24018974 |
| ZBED3-AS1    | NR_024398    | 82.12098192 | 0.714568843 | 3.69E-10    | 114.9238211 |
| PTK6         | NM_001256358 | 129.1016741 | 8.853668876 | 2.43E-10    | 14.58171475 |
| RPL12        | NM_000976    | 181.8558592 | 44.69255494 | 2.32E-07    | 4.069041464 |
| RAB35        | NM_006861    | 61.06049096 | 1.007319246 | 1.12E-06    | 60.61682153 |
| CYB561       | NM_001017916 | 84.4478793  | 5.437981624 | 4.02E-07    | 15.52926897 |
| SLC35D1      | NM_015139    | 110.162165  | 1.544076378 | 1.05E-11    | 71.34502319 |
| ARPIN        | NM_182616    | 50.16216501 | 4.929532414 | 0.000328766 | 10.17584647 |
| MAP7D1       | NM_018067    | 46.77477667 | 4.538549171 | 0.00138146  | 10.30610773 |
| HOXA11       | NM_005523    | 74.81595977 | 15.67385656 | 0.000585034 | 4.773296186 |
| SFXN4        | NM_213649    | 183.9176338 | 3.809887717 | 5.72E-19    | 48.27376749 |
| PRDM4        | NM_012406    | 71.69369417 | 2.245796187 | 2.79E-07    | 31.92350873 |
| FAM173B      | NR_047668    | 129.1016741 | 2.348900738 | 2.28E-14    | 54.9625925  |
| PEX7         | NM_000288    | 106.5096539 | 0.299503813 | 5.41E-14    | 355.6203601 |
| MYO1B        | NM_012223    | 138.2033481 | 0.434365017 | 2.94E-16    | 318.1732936 |
| PSMG1        | NM_001261824 | 169.6319195 | 2.045237064 | 4.46E-21    | 82.9399792  |
| MRPL11       | NM_016050    | 55.34620525 | 6.592946812 | 0.000709389 | 8.394759859 |
| POU2F1       | NR_037163    | 65.97940845 | 0.448146878 | 1.59E-07    | 147.2271964 |
| GTF2IRD2B    | NM_001003795 | 97.67310262 | 2.907121671 | 1.46E-09    | 33.59787229 |
| HNRNPK       | NM_031262    | 101.060491  | 6.763182647 | 1.39E-08    | 14.94274164 |
| PHAX         | NM_032177    | 69.63191953 | 0.091174978 | 6.66E-12    | 763.717428  |
| LEMD2        | NM_181336    | 129.3667968 | 5.303432718 | 1.22E-11    | 24.39303064 |
| WNT10B       | NM_003394    | 101.5907364 | 1.803976882 | 6.06E-12    | 56.31487713 |
| TMEM87B      | NM_032824    | 103.6525111 | 1.353986848 | 1.09E-10    | 76.55355827 |
| KLHL8        | NM_001292007 | 197.4079799 | 0.618259806 | 6.97E-25    | 319.2961567 |
| RPL27A       | NM_000990    | 209.6319195 | 41.30815495 | 5.50E-10    | 5.074831344 |
| INTS7        | NM_001199812 | 63.91763382 | 0.334031566 | 7.57E-08    | 191.3520766 |
| SUPT20H      | NM_001014286 | 158.2033481 | 1.142963421 | 4.64E-18    | 138.415058  |
| STAT2        | NM_005419    | 63.91763382 | 4.008679616 | 2.07E-05    | 15.94480975 |
| TSC2         | NM_001114382 | 118.7335936 | 0.358196316 | 1.46E-17    | 331.4763114 |
| SMG7         | NM_201569    | 54.55083703 | 0.853062626 | 2.58E-06    | 63.94704842 |
| WRAP73       | NM_017818    | 120.7953682 | 0.197216255 | 8.81E-19    | 612.502089  |

|              |              |             |             |             |             |
|--------------|--------------|-------------|-------------|-------------|-------------|
| RAB6A        | NM_002869    | 151.9588169 | 1.656738439 | 1.10E-15    | 91.72167029 |
| C5orf34      | NM_198566    | 67.03989941 | 0.812890959 | 2.13E-07    | 82.47096202 |
| ABTB1        | NM_172027    | 52.75418513 | 2.767858467 | 8.43E-05    | 19.05956744 |
| FAM126B      | NM_173822    | 58.73359358 | 0.123183334 | 2.02E-08    | 476.7982142 |
| AIDA         | NM_022831    | 63.1222656  | 2.300071119 | 4.33E-06    | 27.44361471 |
| WDR5B        | NM_019069    | 121.3256137 | 6.227636052 | 2.95E-11    | 19.48180862 |
| UCHL5        | NM_001199263 | 164.713002  | 2.219418171 | 3.99E-18    | 74.21449649 |
| TRIM65       | NM_173547    | 175.8764507 | 13.97891874 | 1.02E-13    | 12.58154897 |
| CLTA         | NM_001184762 | 130.4272878 | 3.155137566 | 2.15E-13    | 41.33806688 |
| NUDT7        | NM_001243657 | 115.0810825 | 1.875752347 | 2.77E-13    | 61.35195975 |
| NDE1         | NM_001143979 | 90.16216501 | 4.113420466 | 8.80E-08    | 21.91902475 |
| RASSF3       | NR_040718    | 118.2033481 | 2.789488294 | 1.78E-11    | 42.37456324 |
| POLRIE       | NM_022490    | 104.4478793 | 3.313348598 | 1.82E-10    | 31.52335959 |
| RABGEF1      | NM_014504    | 166.7747767 | 1.894097885 | 2.13E-17    | 88.0497138  |
| FTH1         | NM_002032    | 124.5662939 | 23.44832935 | 2.35E-06    | 5.312373944 |
| PRPSAP2      | NM_001243941 | 43.38738834 | 0.833555805 | 4.95E-05    | 52.05097018 |
| CA5BP1       | NR_026551    | 71.42857143 | 1.825209999 | 1.99E-07    | 39.13444012 |
| PRR15        | NM_175887    | 50.69241049 | 8.447645816 | 0.001700384 | 6.000773659 |
| ZNF587       | NM_001204817 | 39.26383906 | 1.215107783 | 0.000319591 | 32.31305043 |
| ANKH         | NM_054027    | 34.81595977 | 1.58140247  | 0.004590296 | 22.01587542 |
| ATP5A1       | NM_004046    | 118.7335936 | 4.628866823 | 3.74E-11    | 25.65068258 |
| ANP32E       | NM_001280559 | 52.75418513 | 3.181258203 | 4.63E-05    | 16.58280522 |
| DPY30        | NM_032574    | 123.1222656 | 0.799195754 | 5.70E-17    | 154.0577073 |
| CDK19        | NM_015076    | 91.95881691 | 0.443110029 | 1.57E-10    | 207.5304348 |
| MTCH1        | NM_014341    | 178.4684708 | 8.829238584 | 2.31E-15    | 20.21334786 |
| SIRT5        | NM_012241    | 118.9987163 | 2.987747602 | 2.55E-12    | 39.8289053  |
| CTNNAL1      | NM_003798    | 145.7142857 | 1.277580324 | 1.07E-15    | 114.0548919 |
| FAM171B      | NM_177454    | 129.8970423 | 0.558738327 | 1.77E-16    | 232.4827848 |
| HTR7         | NM_019860    | 54.81595977 | 1.404618771 | 4.49E-05    | 39.02550707 |
| ZYX          | NM_003461    | 80.26512274 | 10.41198527 | 1.02E-05    | 7.708916277 |
| CCDC58       | NM_001017928 | 52.22393965 | 1.858047095 | 3.58E-05    | 28.10689771 |
| ZC3H13       | NM_015070    | 78.99871632 | 0.719239148 | 1.98E-09    | 109.8365079 |
| TMEM14C      | NM_016462    | 93.01930787 | 6.650207883 | 1.19E-07    | 13.98742859 |
| SEMA7A       | NM_001146030 | 63.65251108 | 3.354043952 | 3.52E-06    | 18.97784048 |
| ITSN1        | NM_001001132 | 123.6525111 | 0.362653472 | 1.28E-14    | 340.9660198 |
| NOC2L        | NM_015658    | 61.3256137  | 3.237972498 | 2.64E-05    | 18.93951037 |
| PNISR        | NM_032870    | 95.87645073 | 1.639061846 | 7.32E-11    | 58.49471205 |
| ERCC4        | NM_005236    | 84.71300204 | 1.273766155 | 2.16E-09    | 66.50592943 |
| BLOC1S1      | NR_037657    | 60.79536822 | 3.207093816 | 8.07E-06    | 18.9565294  |
| CMAS         | NM_018686    | 126.7747767 | 1.581693378 | 2.85E-15    | 80.15129759 |
| CCDC142      | NM_032779    | 69.63191953 | 7.723411988 | 2.66E-05    | 9.015694053 |
| IRAK1BP1     | NM_001010844 | 66.24453119 | 1.998618433 | 1.35E-06    | 33.14516173 |
| PI4KB        | NM_001198773 | 72.22393965 | 4.073108035 | 4.81E-06    | 17.73189884 |
| MRPL20       | NM_017971    | 118.9987163 | 14.57251857 | 3.45E-08    | 8.165967724 |
| CHAMP1       | NM_001164145 | 172.4890624 | 2.493969782 | 1.66E-20    | 69.1624508  |
| SMARCA1      | NM_001282875 | 41.06049096 | 0.463734989 | 7.29E-05    | 88.54300825 |
| SLC6A6       | NR_103507    | 69.63191953 | 2.239456733 | 1.69E-06    | 31.0932194  |
| PTMS         | NM_002824    | 131.4285714 | 16.70658453 | 2.51E-08    | 7.866872562 |
| COA7         | NM_023077    | 109.3667968 | 3.464674379 | 2.62E-11    | 31.56625553 |
| PHF3         | NM_001290259 | 95.61132799 | 1.064879889 | 1.05E-09    | 89.78602088 |
| LOC100996255 | NR_102756    | 143.3873883 | 0.031299727 | 3.40E-26    | 4581.106672 |
| DOCK11       | NM_144658    | 31.95881691 | 0.643675614 | 0.001227255 | 49.65050131 |
| METTL17      | NM_022734    | 69.36679679 | 4.433906501 | 7.15E-06    | 15.64462326 |
| EMC9         | NM_016049    | 206.7747767 | 21.78140459 | 3.08E-13    | 9.493179187 |
| VAMP7        | NR_033714    | 112.4890624 | 2.071593045 | 2.70E-11    | 54.30075306 |
| ADAR         | NM_015840    | 67.57014489 | 2.380134278 | 5.86E-07    | 28.38921548 |
| SPAG9        | NM_001130527 | 76.40669621 | 1.354889103 | 2.34E-07    | 56.39332109 |
| FAM212B      | NM_019099    | 182.3861047 | 5.071979278 | 4.40E-18    | 35.95955241 |
| CBFB         | NM_001755    | 68.83655131 | 0.024874625 | 6.66E-12    | 2767.340233 |
| TMEM161A     | NM_017814    | 158.7335936 | 4.357919358 | 1.70E-15    | 36.42416955 |
| MRPL24       | NM_145729    | 75.08108251 | 10.02019526 | 0.000104667 | 7.492975991 |
| FAAH         | NM_001441    | 88.89575859 | 2.800266131 | 1.69E-08    | 31.7454679  |
| RAB31        | NM_006868    | 77.14285714 | 1.114340846 | 1.49E-08    | 69.22734407 |
| PITPNC1      | NM_181671    | 119.2638391 | 1.304942733 | 1.60E-11    | 91.39392563 |

|              |              |             |             |             |             |
|--------------|--------------|-------------|-------------|-------------|-------------|
| SLC2A6       | NM_001145099 | 167.0398994 | 11.03476098 | 1.39E-13    | 15.13760921 |
| NUB1         | NM_001243351 | 98.2033481  | 1.250784333 | 1.05E-10    | 78.51341392 |
| ZNF280A      | NM_080740    | 40.79536822 | 1.137527589 | 8.62E-05    | 35.86319013 |
| LINC01184    | NR_015360    | 156.6718189 | 1.788735993 | 1.00E-16    | 87.58800601 |
| DCTN4        | NM_016221    | 58.2033481  | 1.695562805 | 1.55E-05    | 34.32686064 |
| SLC43A1      | NM_003627    | 60.26512274 | 1.660928824 | 4.43E-06    | 36.28398874 |
| COX15        | NM_004376    | 123.9176338 | 5.876342487 | 1.36E-10    | 21.08754452 |
| SCAF1        | NM_021228    | 50.16216501 | 5.360651426 | 0.000345095 | 9.357475618 |
| CDK9         | NM_001261    | 89.36679679 | 9.477188631 | 1.32E-06    | 9.429673743 |
| SLC4A7       | NM_001258379 | 163.3873883 | 0.031921518 | 7.53E-28    | 5118.409092 |
| DHPS         | NM_001930    | 112.4890624 | 6.593154275 | 4.70E-10    | 17.06149404 |
| ASTE1        | NM_014065    | 77.93822536 | 4.305584723 | 3.76E-07    | 18.10165875 |
| RCBTB2       | NM_001286831 | 78.99871632 | 0.989942106 | 1.34E-08    | 79.80134984 |
| MXI1         | NM_130439    | 82.12098192 | 3.08266847  | 6.62E-08    | 26.6395763  |
| HNRNPLL      | NM_001142650 | 92.22393965 | 0.501089309 | 1.92E-12    | 184.0469115 |
| SLC19A2      | NM_006996    | 105.5083703 | 1.992383994 | 6.67E-12    | 52.95584113 |
| MYL6B        | NM_002475    | 55.34620525 | 6.275349323 | 0.000315174 | 8.819621411 |
| AP5S1        | NM_001204447 | 41.38482098 | 2.216986253 | 0.000805004 | 18.66715272 |
| KIAA0247     | NM_014734    | 65.71428571 | 0.885956417 | 1.58E-07    | 74.1732713  |
| NDUFAF4      | NM_014165    | 81.3256137  | 4.769988784 | 5.22E-07    | 17.049435   |
| BACH1        | NM_001186    | 74.55083703 | 0.866132156 | 4.05E-09    | 86.0732817  |
| IL7          | NM_000880    | 34.07979883 | 0.347164208 | 0.000276263 | 98.16622245 |
| ZNF490       | NM_020714    | 95.34620525 | 0.531696356 | 9.31E-12    | 179.3245416 |
| OGDHL        | NM_001143997 | 44.97812478 | 0.352180245 | 2.05E-06    | 127.7133668 |
| INTS6        | NM_001039938 | 140         | 30.629826   | 1.81E-06    | 4.570708303 |
| CEP85        | NM_022778    | 178.2033481 | 2.154687737 | 2.26E-19    | 82.70495305 |
| TM2D1        | NM_032027    | 92.48906239 | 1.307591734 | 9.95E-10    | 70.73237004 |
| CDCA5        | NM_080668    | 84.18275656 | 8.275935968 | 2.16E-06    | 10.17199225 |
| POC1B        | NM_172240    | 49.89704227 | 1.460882107 | 0.00016669  | 34.15542024 |
| SPATS2       | NM_001293286 | 103.9176338 | 2.235866195 | 7.69E-10    | 46.47757279 |
| MPHOSPH10    | NM_005791    | 99.26383906 | 4.186130662 | 2.02E-09    | 23.71255154 |
| NUDT18       | NM_024815    | 103.6525111 | 14.94838835 | 2.95E-06    | 6.934025839 |
| DNMT1        | NM_001379    | 86.77477667 | 3.563468221 | 3.09E-08    | 24.35121385 |
| PRMT6        | NM_018137    | 70.16216501 | 10.23475739 | 0.000108275 | 6.855283655 |
| RAD51C       | NM_002876    | 209.6319195 | 3.195380847 | 2.31E-23    | 65.60467423 |
| POLR2H       | NM_001278715 | 135.8764507 | 11.61165155 | 2.82E-10    | 11.70173339 |
| SNRNP35      | NM_022717    | 75.87645073 | 6.054078705 | 1.67E-06    | 12.5331127  |
| ELOVL6       | NM_001130721 | 63.91763382 | 1.869744312 | 7.48E-06    | 34.18522704 |
| ATP5J2-PTCD1 | NM_001198879 | 123.6525111 | 7.892606523 | 5.59E-10    | 15.66687896 |
| ACTB         | NM_001101    | 190.4272878 | 31.93184048 | 7.74E-10    | 5.963555024 |
| AMOTL1       | NM_001301007 | 75.87645073 | 0.626332623 | 4.77E-09    | 121.1440183 |
| ROCK2        | NM_004850    | 97.93822536 | 0.409833713 | 1.66E-11    | 238.9706417 |
| LOC440700    | NR_036683    | 75.61132799 | 1.222641454 | 2.74E-09    | 61.84260132 |
| C11orf73     | NR_024597    | 83.91763382 | 0.668977158 | 1.16E-10    | 125.4417027 |
| FAM169A      | NR_046462    | 89.89704227 | 1.032373866 | 3.42E-10    | 87.07799106 |
| ITPK1        | NM_001142593 | 60.26512274 | 1.352969461 | 1.37E-05    | 44.54285515 |
| CYBA         | NM_000101    | 186.7747767 | 18.28450462 | 6.50E-13    | 10.21492135 |
| C11orf52     | NM_080659    | 60.53024548 | 8.811360613 | 0.000587927 | 6.86956852  |
| MYO9B        | NM_001130065 | 37.40797988 | 1.585962767 | 0.002406093 | 23.58692187 |
| TMEM110      | NM_198563    | 137.9382254 | 0.038285954 | 2.21E-24    | 3602.841528 |
| ZNF594       | NM_032530    | 140.2651227 | 8.37538153  | 5.55E-12    | 16.74731142 |
| EPM2AIP1     | NM_014805    | 78.73359358 | 4.933752907 | 4.10E-07    | 15.95815499 |
| DAB2         | NM_001244871 | 77.93822536 | 0.144307594 | 1.09E-11    | 540.0840193 |
| ZNF497       | NM_198458    | 110.162165  | 6.3082884   | 1.22E-09    | 17.46308317 |
| SRCAP        | NM_006662    | 55.34620525 | 2.359287317 | 3.41E-05    | 23.4588661  |
| BACE2        | NM_138991    | 69.63191953 | 1.069922496 | 9.91E-08    | 65.0812744  |
| RPL3         | NM_001033853 | 204.4478793 | 26.91433046 | 3.12E-12    | 7.596246156 |
| FRMD8        | NM_001300833 | 103.3873883 | 2.166876061 | 3.96E-11    | 47.71264505 |
| TOP3A        | NM_004618    | 86.50965393 | 2.885420515 | 1.65E-08    | 29.98164513 |
| TXN2         | NM_012473    | 135.3462052 | 2.811488734 | 1.06E-14    | 48.14040463 |
| B4GALT1-AS1  | NR_108110    | 109.8970423 | 3.886645006 | 4.81E-11    | 28.27555439 |
| RPL4         | NM_000968    | 139.7940845 | 9.583421422 | 1.24E-11    | 14.58707474 |
| MPZL3        | NM_001286152 | 72.22393965 | 1.041266875 | 4.92E-08    | 69.36160303 |
| FAF2         | NM_014613    | 92.75418513 | 0.499818167 | 9.39E-12    | 185.575858  |



|          |              |             |             |             |             |
|----------|--------------|-------------|-------------|-------------|-------------|
| LARP4B   | NM_015155    | 60.26512274 | 2.617362477 | 1.51E-05    | 23.02513437 |
| CGRRF1   | NM_006568    | 116.1415735 | 1.074609329 | 5.23E-14    | 108.0779501 |
| ARCN1    | NM_001655    | 97.93822536 | 0.820921902 | 1.30E-11    | 119.3027316 |
| DSE      | NM_013352    | 107.3050222 | 1.264141649 | 2.28E-11    | 84.8837013  |
| AK6      | NM_016283    | 141.060491  | 2.89041796  | 6.12E-15    | 48.80280046 |
| CEPT1    | NM_001007794 | 86.50965393 | 1.97384685  | 1.09E-08    | 43.82794639 |
| ELOVL5   | NM_001242830 | 55.34620525 | 2.592824211 | 4.93E-05    | 21.34591501 |
| RCBTB1   | NM_018191    | 160.5302455 | 1.293764218 | 5.48E-18    | 124.0799855 |
| CISD1    | NM_018464    | 86.77477667 | 0.730041001 | 6.68E-11    | 118.8628811 |
| MOGS     | NM_001146158 | 124.1827566 | 14.67426217 | 3.28E-08    | 8.462623545 |
| TRIM13   | NM_001007278 | 174.8159598 | 6.372257593 | 3.22E-16    | 27.4339129  |
| MLX      | NM_198204    | 66.77477667 | 9.855947302 | 0.000457394 | 6.775074442 |
| KCTD18   | NM_152387    | 115.8764507 | 2.340577308 | 3.58E-13    | 49.50763658 |
| CACFD1   | NM_001242369 | 87.30502215 | 5.62605234  | 1.29E-07    | 15.51798968 |
| C20orf24 | NM_018840    | 104.713002  | 8.01143237  | 2.76E-08    | 13.07044698 |
| GOT1     | NM_002079    | 92.22393965 | 2.584901475 | 2.35E-09    | 35.67793222 |
| DAPK2    | NM_014326    | 29.36679679 | 1.231268652 | 0.002612756 | 23.85084421 |
| TIRAP    | NM_001039661 | 137.9382254 | 6.602108785 | 4.53E-12    | 20.89305551 |
| STARD3   | NM_006804    | 185.2432475 | 5.141495669 | 1.84E-17    | 36.02905836 |
| FAM86HP  | NR_024252    | 106.7747767 | 4.946622883 | 1.89E-09    | 21.58538849 |
| AASDHPPT | NM_015423    | 117.4079799 | 0.890088311 | 4.92E-15    | 131.9059901 |
| CTSV     | NM_001333    | 118.4684708 | 4.742159364 | 2.24E-11    | 24.98196744 |
| H2AFY    | NM_138609    | 85.71428571 | 1.789160638 | 1.61E-08    | 47.9075405  |
| ETFA     | NM_001127716 | 144.4478793 | 0.592047234 | 5.27E-18    | 243.9803298 |
| PSAT1    | NM_058179    | 117.9382254 | 0.96148084  | 5.23E-14    | 122.6631052 |
| CTDSPL2  | NM_016396    | 98.2033481  | 1.256158868 | 9.78E-10    | 78.17749061 |
| SEMA4B   | NM_198925    | 163.1222656 | 5.457089653 | 9.15E-15    | 29.89180606 |
| KDF1     | NM_152365    | 101.8558592 | 6.182364088 | 3.87E-09    | 16.4752282  |
| FAM86A   | NM_201598    | 123.1222656 | 6.001623566 | 3.36E-11    | 20.5148264  |
| SF3A3    | NM_006802    | 118.7335936 | 0.650229962 | 3.06E-15    | 182.6024646 |
| TXNDC9   | NM_005783    | 136.1415735 | 0.952351102 | 1.66E-18    | 142.9531327 |
| HHEX     | NM_002729    | 147.3050222 | 6.8710519   | 4.56E-14    | 21.43849651 |
| BMF      | NM_001003943 | 58.2033481  | 2.784941491 | 1.09E-05    | 20.89930732 |
| ZNF512   | NM_032434    | 119.2638391 | 1.05487173  | 8.22E-14    | 113.0600391 |
| RFC3     | NM_181558    | 72.75418513 | 1.336704537 | 8.69E-07    | 54.42802287 |
| DDX46    | NM_014829    | 39.26383906 | 2.048601075 | 0.001182022 | 19.16617126 |
| CLTC     | NM_004859    | 126.7747767 | 3.872470661 | 3.08E-11    | 32.7374402  |
| TIMM21   | NM_014177    | 33.28443061 | 0.251789208 | 1.90E-05    | 132.191649  |
| FBXO17   | NM_024907    | 60.79536822 | 1.123460719 | 2.95E-06    | 54.11436927 |
| NACA     | NR_045277    | 101.3256137 | 10.39398042 | 1.53E-07    | 9.748489955 |
| ZNF695   | NR_037892    | 91.69369417 | 0.926418928 | 9.95E-10    | 98.97649039 |
| UFSP2    | NR_028085    | 84.18275656 | 0.563559952 | 2.31E-10    | 149.3767544 |
| CECR5    | NM_033070    | 124.713002  | 3.640718083 | 1.88E-12    | 34.25505607 |
| C15orf41 | NM_001130010 | 78.2033481  | 0.564108189 | 1.15E-08    | 138.6318258 |
| CAPN5    | NM_004055    | 144.4478793 | 0.400380546 | 3.73E-20    | 360.7764678 |
| RNFT1    | NM_016125    | 190.9575332 | 4.542720886 | 2.13E-20    | 42.03593794 |
| ENO1     | NM_001428    | 90.69241049 | 15.51563056 | 2.47E-05    | 5.845228793 |
| SMAD3    | NM_005902    | 58.2033481  | 4.806073787 | 0.000177984 | 12.11037339 |
| GSPT1    | NM_002094    | 141.5907364 | 2.174292263 | 3.82E-15    | 65.12037911 |
| ARHGEF3  | NM_001128615 | 87.30502215 | 1.308631075 | 1.68E-09    | 66.71477076 |
| RAB8A    | NM_005370    | 33.28443061 | 3.198356379 | 0.003539403 | 10.40672979 |
| MPST     | NM_021126    | 126.2445312 | 4.158878937 | 1.40E-12    | 30.35542345 |
| FAM133B  | NM_001288584 | 49.89704227 | 0.689464741 | 2.74E-06    | 72.37069471 |
| PSMA6    | NM_001282232 | 53.01930787 | 1.223766019 | 1.03E-05    | 43.32471    |
| CD97     | NM_001025160 | 68.83655131 | 9.03552869  | 5.65E-05    | 7.618430938 |
| PPP2R3C  | NM_017917    | 73.28443061 | 1.867507782 | 1.47E-07    | 39.24183413 |
| ZCCHC3   | NM_033089    | 107.3050222 | 18.65660095 | 4.74E-06    | 5.751584785 |
| PTCD2    | NM_001284404 | 132.7541851 | 3.20671602  | 1.60E-12    | 41.39879687 |
| ACTR3    | NM_005721    | 34.81595977 | 1.048092288 | 0.000521184 | 33.21841041 |
| CHMP2B   | NM_001244644 | 152.4890624 | 1.643062765 | 8.01E-18    | 92.80781331 |
| UFD1L    | NM_005659    | 73.01930787 | 1.724754703 | 8.77E-08    | 42.33605378 |
| NMT1     | NM_021079    | 117.6731026 | 3.816125619 | 1.18E-10    | 30.83575185 |
| NT5E     | NM_002526    | 50.16216501 | 4.721219553 | 0.000493043 | 10.62483209 |
| FAM83D   | NM_030919    | 127.5701449 | 2.282366157 | 2.79E-14    | 55.89381199 |

|              |              |             |             |             |             |
|--------------|--------------|-------------|-------------|-------------|-------------|
| TIGD1        | NM_145702    | 163.6525111 | 16.14824092 | 7.27E-11    | 10.13438627 |
| NCKAP1       | NM_205842    | 126.2445312 | 0.824492748 | 1.44E-14    | 153.1178189 |
| ABCB8        | NM_001282293 | 104.713002  | 2.784618125 | 1.39E-10    | 37.60407974 |
| FAM35A       | NM_019054    | 92.22393965 | 0.781259686 | 1.07E-10    | 118.0451791 |
| SLC36A1      | NM_078483    | 81.59073644 | 0.467396044 | 4.09E-11    | 174.5644564 |
| SSH3         | NM_017857    | 112.2239396 | 9.925369298 | 2.39E-08    | 11.30677724 |
| PTTG1IP      | NM_004339    | 55.08108251 | 4.571423207 | 0.000204847 | 12.04900094 |
| DENND4B      | NM_014856    | 69.10167405 | 3.091634603 | 3.23E-06    | 22.35117759 |
| SMIM7        | NM_001300925 | 120.7953682 | 7.425918623 | 1.53E-10    | 16.26672394 |
| STK4-AS1     | NR_038341    | 81.3256137  | 8.150500642 | 7.02E-06    | 9.977989975 |
| ZBTB1        | NM_014950    | 103.9176338 | 1.813589929 | 2.87E-11    | 57.2994105  |
| CHST11       | NM_018413    | 60.26512274 | 0.854696409 | 1.33E-06    | 70.51056038 |
| POLR2J2      | NM_032959    | 57.40797988 | 1.088636357 | 6.51E-06    | 52.73384406 |
| CAMK1D       | NM_020397    | 29.36679679 | 0.2788107   | 0.002525241 | 105.3288012 |
| FXN          | NM_001161706 | 85.97940845 | 3.339015204 | 3.05E-08    | 25.74993021 |
| BAIAP2       | NM_006340    | 217.9382254 | 4.899251571 | 2.77E-20    | 44.48398336 |
| MCM2         | NR_073375    | 70.69241049 | 1.836698811 | 1.53E-07    | 38.48884209 |
| ST3GAL1      | NM_003033    | 137.6731026 | 1.241079047 | 4.79E-14    | 110.9301643 |
| USP16        | NM_001001992 | 72.22393965 | 1.348321316 | 1.28E-07    | 53.56582201 |
| RABGAP1      | NM_012197    | 180.7953682 | 1.285098579 | 2.49E-18    | 140.6859919 |
| TMBIM1       | NM_022152    | 107.8352676 | 6.833592068 | 3.52E-09    | 15.78017338 |
| KIAA0196     | NM_014846    | 69.89704227 | 2.081378642 | 1.37E-06    | 33.58208875 |
| PLXNB1       | NM_002673    | 57.67310262 | 0.343085777 | 2.71E-08    | 168.1011177 |
| LONRF1       | NM_152271    | 80.26512274 | 2.608841185 | 4.70E-08    | 30.76658065 |
| CS           | NM_004077    | 115.8764507 | 3.96666936  | 4.84E-11    | 29.21253077 |
| ZBTB43       | NM_014007    | 109.3667968 | 2.192179392 | 1.48E-11    | 49.88952875 |
| TBC1D9       | NM_015130    | 63.1222656  | 0.248924509 | 8.50E-08    | 253.5799539 |
| S100A16      | NM_080388    | 112.4890624 | 13.21691396 | 2.71E-07    | 8.510993018 |
| UQCRC2       | NM_003366    | 55.61132799 | 1.992403969 | 2.33E-05    | 27.91167296 |
| WBP11        | NM_016312    | 35.61132799 | 0.414581092 | 6.42E-05    | 85.89713488 |
| DARS         | NM_001293312 | 115.0810825 | 0.668410717 | 5.48E-14    | 172.171211  |
| VPS54        | NM_001005739 | 40.53024548 | 0.11391367  | 2.48E-05    | 355.797909  |
| RPL34        | NM_033625    | 70.16216501 | 6.803823836 | 1.09E-05    | 10.31216661 |
| PITRM1       | NM_001242307 | 157.4079799 | 2.772729377 | 8.27E-16    | 56.77004803 |
| NDNL2        | NM_138704    | 160.7953682 | 16.04091411 | 4.67E-10    | 10.02407762 |
| FBXO38       | NM_030793    | 78.73359358 | 1.37368262  | 4.14E-08    | 57.31570921 |
| RASGRF1      | NM_153815    | 29.63191953 | 0.927922405 | 0.001866514 | 31.93361791 |
| NBPF3        | NM_001256417 | 160.7953682 | 2.367260642 | 3.82E-17    | 67.92465745 |
| BLVRA        | NM_001253823 | 80.53024548 | 1.022956226 | 1.70E-08    | 78.72306112 |
| ZNF674       | NM_001146291 | 61.3256137  | 1.138738696 | 4.75E-06    | 53.85398241 |
| NDUFA11      | NR_034166    | 58.2033481  | 5.595390896 | 0.000251428 | 10.40201644 |
| GANAB        | NM_198335    | 69.89704227 | 5.93464523  | 8.50E-06    | 11.77779624 |
| HDGFRP2      | NM_001001520 | 28.83655131 | 0.657372677 | 0.001241532 | 43.86636729 |
| RAB19        | NM_001008749 | 35.87645073 | 0.768113749 | 7.93E-05    | 46.70721069 |
| PIGY         | NM_001042616 | 187.5701449 | 10.21949614 | 5.29E-16    | 18.35414802 |
| RNF6         | NM_183044    | 80.79536822 | 1.617247656 | 4.76E-09    | 49.95856258 |
| POLR3GL      | NM_032305    | 141.5907364 | 1.050304816 | 2.25E-18    | 134.8091852 |
| DDX11        | NM_152438    | 76.93694168 | 4.669658807 | 1.26E-06    | 16.47592359 |
| C19orf47     | NM_001256441 | 103.6525111 | 2.015929739 | 3.40E-11    | 51.41672802 |
| PET117       | NM_001164811 | 136.6718189 | 9.163923673 | 1.90E-11    | 14.91411581 |
| RMDN3        | NM_018145    | 78.46847084 | 2.462316798 | 3.49E-08    | 31.86773973 |
| EEF2         | NM_001961    | 157.9974326 | 14.84434171 | 2.67E-11    | 10.64361329 |
| LOC100133669 | NR_026913    | 46.77477667 | 1.957130332 | 0.000230714 | 23.89967388 |
| FRAT2        | NM_012083    | 115.0810825 | 1.180542838 | 2.86E-13    | 97.48149646 |
| IL17RE       | NM_001193380 | 81.3256137  | 3.775205678 | 1.47E-07    | 21.54203522 |
| NUDT4P2      | NR_104005    | 161.8558592 | 3.436824823 | 8.67E-17    | 47.09459094 |
| RBAK         | NM_021163    | 129.6319195 | 2.029952078 | 1.00E-14    | 63.85959595 |
| PSMC3        | NM_002804    | 107.0398994 | 2.066453059 | 1.01E-12    | 51.79885358 |
| DCUN1D3      | NM_173475    | 37.67310262 | 1.981940996 | 0.001937223 | 19.00818576 |
| SEMA4F       | NR_073399    | 122.3861047 | 2.006000986 | 1.36E-13    | 61.00999226 |
| NTAN1        | NM_001270766 | 100.7953682 | 1.843919386 | 1.48E-11    | 54.6636523  |
| CSGALNACT2   | NM_018590    | 97.93822536 | 0.205795954 | 1.38E-14    | 475.8996645 |
| LINC01481    | NR_120460    | 137.9382254 | 2.919964849 | 3.13E-14    | 47.23968695 |
| MPZL1        | NM_024569    | 137.9382254 | 0.346220725 | 7.20E-19    | 398.4112317 |

|              |              |             |             |             |             |
|--------------|--------------|-------------|-------------|-------------|-------------|
| FAM214B      | NM_025182    | 51.42857143 | 7.745315795 | 0.001329509 | 6.639957981 |
| C1orf123     | NM_017887    | 195.611328  | 6.502080862 | 4.91E-19    | 30.08441946 |
| AHNAK        | NM_001620    | 130.162165  | 5.758709735 | 2.78E-11    | 22.60266118 |
| LOC100506747 | NR_036557    | 110.9575332 | 2.019947035 | 1.01E-12    | 54.93091221 |
| MAP4         | NM_001134364 | 173.0193079 | 1.547653239 | 3.94E-17    | 111.7946213 |
| PNPLA3       | NM_025225    | 161.5907364 | 0.899218482 | 1.12E-21    | 179.7013069 |
| VBP1         | NM_003372    | 27.03989941 | 0.049147295 | 0.000197112 | 550.1808252 |
| C22orf29     | NM_024627    | 203.9176338 | 12.64218086 | 1.40E-16    | 16.1299412  |
| PRKAR2A-AS1  | NR_109996    | 110.6924105 | 6.945479248 | 2.65E-09    | 15.93733226 |
| UBIAD1       | NM_013319    | 166.2445312 | 2.524285794 | 4.27E-19    | 65.85804651 |
| C14orf119    | NM_017924    | 115.0810825 | 6.18527807  | 3.66E-10    | 18.60564411 |
| AP2A2        | NM_012305    | 141.060491  | 0.205146022 | 4.51E-20    | 687.6101707 |
| PSMD5-AS1    | NR_024408    | 92.48906239 | 3.800103694 | 4.11E-09    | 24.3385628  |
| BRK1         | NM_018462    | 124.4478793 | 1.860950436 | 5.93E-15    | 66.87329062 |
| IFNAR2       | NM_000874    | 146.5096539 | 2.51299014  | 7.38E-16    | 58.3009267  |
| ATP6V0B      | NM_004047    | 87.03989941 | 20.14502758 | 0.000433662 | 4.320664198 |
| AAR2         | NM_001271874 | 140.7953682 | 0.851412297 | 8.62E-19    | 165.3668484 |
| RNF169       | NM_001098638 | 81.3256137  | 0.908680083 | 3.13E-09    | 89.49862031 |
| CHD6         | NM_032221    | 21.59073644 | 0.028676823 | 0.002923898 | 752.8984874 |
| LOC101928414 | NR_120335    | 101.060491  | 0.838692098 | 3.72E-12    | 120.4977264 |
| COP55        | NM_006837    | 62.12098192 | 2.657581694 | 2.01E-06    | 23.3750037  |
| OXR1         | NM_181354    | 172.7541851 | 0.6345614   | 3.15E-21    | 272.2418748 |
| CCDC94       | NM_018074    | 90.16216501 | 0.735470306 | 1.55E-11    | 122.5911696 |
| SF3B4        | NM_005850    | 172.2239396 | 14.16620723 | 9.77E-13    | 12.15737825 |
| TSTD3        | NM_001195131 | 169.3667968 | 4.222998191 | 1.11E-17    | 40.10581799 |
| QPCTL        | NM_017659    | 61.59073644 | 4.964804584 | 1.54E-05    | 12.40547043 |
| DNAJC18      | NM_152686    | 74.28571429 | 0.243091997 | 2.06E-11    | 305.586836  |
| C20orf27     | NM_001258429 | 101.5907364 | 4.692521431 | 5.66E-10    | 21.64949866 |
| LYRM7        | NR_121658    | 66.50965393 | 0.253508252 | 1.15E-09    | 262.3569583 |
| METTL18      | NM_033418    | 87.03989941 | 4.802221472 | 2.12E-07    | 18.12492404 |
| HEXIM2       | NM_144608    | 57.93822536 | 9.957290445 | 0.001267945 | 5.818673833 |
| SYVN1        | NM_172230    | 96.67181894 | 17.66320606 | 3.60E-05    | 5.473061832 |
| NAA20        | NM_181528    | 55.34620525 | 2.687482372 | 1.66E-05    | 20.59407192 |
| LDHA         | NM_001165414 | 64.18275656 | 1.604180641 | 3.36E-07    | 40.00968152 |
| TMEM33       | NM_018126    | 89.63191953 | 1.542785576 | 8.06E-10    | 58.09745758 |
| LOC101929057 | NR_111915    | 128.8365513 | 1.794137378 | 1.22E-13    | 71.80974706 |
| PFN4         | NM_199346    | 80.53024548 | 3.831347159 | 2.61E-07    | 21.01878064 |
| STRA13       | NM_001271007 | 149.6319195 | 19.26742789 | 1.78E-09    | 7.766055769 |
| OSBPL10      | NM_017784    | 100         | 0.981609492 | 8.55E-11    | 101.8735055 |
| PDCD2L       | NM_032346    | 97.40797988 | 3.942497647 | 4.57E-09    | 24.70717515 |
| RPS7         | NM_001011    | 98.73359358 | 10.35750272 | 5.38E-07    | 9.532567476 |
| XRCC6        | NM_001288978 | 83.91763382 | 4.618406912 | 4.32E-07    | 18.17025555 |
| ZCCHC6       | NM_001185074 | 81.06049096 | 0.6806593   | 9.05E-10    | 119.0911385 |
| NOP10        | NM_018648    | 98.2033481  | 8.364611618 | 1.05E-06    | 11.74033567 |
| GLB1         | NM_000404    | 109.3667968 | 0.905178507 | 1.47E-12    | 120.8234574 |
| LOC100507217 | NR_037601    | 22.85714286 | 0.430186835 | 0.003313529 | 53.13305982 |
| ZC3H10       | NM_032786    | 97.93822536 | 15.98369117 | 1.43E-05    | 6.12738474  |
| LOXL1        | NM_005576    | 67.03989941 | 4.852461962 | 1.61E-05    | 13.81564656 |
| COPZ1        | NM_016057    | 119.2638391 | 3.042147243 | 9.45E-12    | 39.20383517 |
| CHSY1        | NM_014918    | 82.85714286 | 0.839556236 | 8.50E-10    | 98.69159363 |
| PAM          | NM_001177306 | 64.4478793  | 0.920271136 | 2.43E-07    | 70.03140351 |
| TRAPPC2      | NM_001011658 | 54.81595977 | 2.304264883 | 2.01E-05    | 23.78891427 |
| COX19        | NM_001031617 | 50.69241049 | 9.113594414 | 0.004106883 | 5.562285108 |
| SLC26A2      | NM_000112    | 137.4079799 | 3.264985831 | 1.18E-13    | 42.08532195 |
| EXOC8        | NM_175876    | 80.53024548 | 0.681500441 | 3.57E-11    | 118.1660945 |
| CIAPIN1      | NM_020313    | 153.5495533 | 1.940104726 | 1.34E-17    | 79.14498187 |
| FBXO7        | NM_001033024 | 70.95753323 | 0.103651197 | 2.02E-12    | 684.5799716 |
| PNO1         | NM_020143    | 89.36679679 | 0.768570875 | 2.48E-11    | 116.2765851 |
| SURF6        | NM_006753    | 126.2445312 | 2.977614744 | 7.60E-14    | 42.39787281 |
| MFSD2A       | NM_001287808 | 104.713002  | 1.947807318 | 1.46E-11    | 53.7594253  |
| FBXO8        | NM_012180    | 48.36551311 | 0.56532166  | 4.32E-06    | 85.55397129 |
| TBC1D19      | NM_018317    | 155.0810825 | 0.303619108 | 2.62E-19    | 510.7751076 |
| C8orf33      | NM_023080    | 80.53024548 | 3.704862    | 1.13E-07    | 21.73636845 |
| ATP6V0C      | NM_001694    | 97.40797988 | 7.953916709 | 4.46E-08    | 12.24654261 |

|                 |              |             |             |             |             |
|-----------------|--------------|-------------|-------------|-------------|-------------|
| NLRX1           | NM_024618    | 130.4272878 | 4.484151754 | 1.97E-12    | 29.08627872 |
| FARSB           | NM_005687    | 62.38610466 | 0.776539395 | 2.36E-07    | 80.33862167 |
| EPN1            | NM_001130072 | 91.95881691 | 0.884504768 | 2.44E-11    | 103.9664457 |
| FADS3           | NM_021727    | 86.77477667 | 4.815617908 | 8.49E-08    | 18.01944804 |
| ALMS1           | NM_015120    | 47.03989941 | 0.274606091 | 2.30E-05    | 171.2995487 |
| PIGC            | NM_002642    | 52.75418513 | 4.392521888 | 0.000439887 | 12.00999938 |
| C16orf72        | NM_014117    | 132.7541851 | 3.497777733 | 8.03E-13    | 37.95386536 |
| PLEKHA8         | NM_001197027 | 109.8970423 | 0.418518193 | 8.89E-14    | 262.5860574 |
| NBR2            | NR_003108    | 41.06049096 | 2.368164706 | 0.000733876 | 17.33852838 |
| KDM3B           | NM_016604    | 37.67310262 | 0.490999413 | 0.000178787 | 76.72738829 |
| HELZ            | NM_014877    | 132.2239396 | 0.145027492 | 6.51E-18    | 911.7163771 |
| GGTA1P          | NR_003191    | 61.06049096 | 0.891770347 | 2.62E-07    | 68.47109363 |
| GAN             | NM_022041    | 219.5289618 | 1.442426507 | 9.10E-25    | 152.1942094 |
| IFT172          | NM_015662    | 18.99871632 | 0.013594039 | 0.002143505 | 1397.576996 |
| CCDC186         | NM_018017    | 167.3050222 | 0.846406399 | 2.86E-20    | 197.6651196 |
| NUP62           | NM_001193357 | 103.9176338 | 3.724623618 | 9.75E-10    | 27.90017045 |
| GRB10           | NM_001001555 | 31.42857143 | 0.669781295 | 0.001252021 | 46.92363262 |
| CTR9            | NM_014633    | 110.9575332 | 3.270790817 | 1.32E-10    | 33.92376322 |
| SLTM            | NM_024755    | 191.9588169 | 0.919249686 | 5.03E-23    | 208.821194  |
| MTRF1           | NM_004294    | 69.89704227 | 0.580668617 | 8.93E-09    | 120.3733769 |
| GAS2L1          | NM_152236    | 94.81595977 | 7.634944361 | 6.77E-08    | 12.41868379 |
| RPL36A-HNRNPH2  | NM_001199974 | 71.95881691 | 6.519383112 | 2.39E-05    | 11.03767269 |
| RNF2            | NM_007212    | 89.10167405 | 0.545729934 | 2.32E-11    | 163.2706373 |
| UBXN7           | NM_015562    | 121.060491  | 0.247888089 | 9.89E-17    | 488.3675188 |
| TAOK2           | NM_001252043 | 89.89704227 | 4.421301178 | 2.37E-08    | 20.33271172 |
| MIR181A1HG      | NR_040073    | 52.22393965 | 0.238318801 | 2.24E-06    | 219.1347872 |
| TROVE2          | NM_004600    | 98.99871632 | 2.433736203 | 1.11E-10    | 40.67766925 |
| SCAMP2          | NM_005697    | 186.5096539 | 2.119212248 | 1.82E-20    | 88.00895433 |
| HCN3            | NM_020897    | 46.24453119 | 0.052847535 | 3.78E-08    | 875.0555992 |
| SLMO1           | NM_001142405 | 140.7953682 | 3.611212726 | 5.66E-14    | 38.98838947 |
| HNRNPR          | NM_001297622 | 57.93822536 | 1.806882591 | 1.33E-05    | 32.06529614 |
| EARS2           | NR_003501    | 87.03989941 | 2.180052694 | 8.38E-09    | 39.9255943  |
| LOC646903       | NR_036538    | 112.2239396 | 4.110124252 | 2.41E-10    | 27.30426935 |
| CSNK2A1         | NM_177560    | 134.8159598 | 3.143856387 | 1.82E-13    | 42.88235312 |
| LOC100507530    | NR_125386    | 121.5907364 | 1.585484332 | 1.88E-12    | 76.68996407 |
| RPRD1B          | NM_021215    | 108.1003904 | 1.441908318 | 2.22E-11    | 74.97036323 |
| DMAP1           | NM_001034024 | 112.7541851 | 6.021053363 | 6.10E-10    | 18.72665434 |
| CDC20           | NM_001255    | 135.0810825 | 17.8030089  | 4.03E-08    | 7.587542269 |
| CTC1            | NR_046431    | 123.6525111 | 7.323949133 | 1.95E-10    | 16.88331102 |
| TMEM199         | NM_152464    | 67.03989941 | 2.02077003  | 1.17E-07    | 33.17542245 |
| SMC5-AS1        | NR_039990    | 118.2033481 | 0.227054423 | 7.16E-18    | 520.5947831 |
| UBP1            | NM_001128161 | 91.69369417 | 1.984566257 | 3.14E-09    | 46.20339272 |
| NDUFA5          | NR_104169    | 44.4478793  | 1.294866062 | 0.000100681 | 34.32623699 |
| PSKH1           | NM_006742    | 112.4890624 | 1.736705359 | 4.50E-12    | 64.77152951 |
| DIS3            | NM_014953    | 81.59073644 | 2.694624329 | 1.59E-08    | 30.27907659 |
| CCT4            | NM_006430    | 164.1827566 | 7.053720884 | 7.37E-15    | 23.27604951 |
| ASPM            | NM_001206846 | 35.61132799 | 1.23949044  | 0.000526115 | 28.73061932 |
| PPIL2           | NM_014337    | 112.4890624 | 2.27519754  | 6.69E-12    | 49.44144868 |
| GBA             | NM_001171811 | 69.63191953 | 7.731592122 | 2.66E-05    | 9.006155321 |
| SEC24B-AS1      | NR_039978    | 124.4478793 | 3.988655924 | 3.49E-13    | 31.20045491 |
| RP2             | NM_006915    | 69.36679679 | 0.4238896   | 3.63E-09    | 163.643545  |
| NLE1            | NM_001014445 | 114.8159598 | 1.874018614 | 2.10E-13    | 61.26724619 |
| ZMYM5           | NM_001142684 | 123.3873883 | 2.318467391 | 5.95E-13    | 53.21937622 |
| CMTM8           | NM_178868    | 83.65251108 | 1.693407687 | 6.19E-08    | 49.39892012 |
| FAM83H          | NM_198488    | 70.16216501 | 14.18556869 | 0.000759293 | 4.946024127 |
| SLC7A6          | NM_003983    | 124.4478793 | 3.264493107 | 6.44E-12    | 38.12165479 |
| CNNM4           | NM_020184    | 60.26512274 | 1.185841403 | 5.37E-06    | 50.8205588  |
| TMEM41B         | NM_001165030 | 75.08108251 | 1.916601574 | 4.77E-08    | 39.17406911 |
| PRKCG           | NM_002739    | 55.34620525 | 1.836859013 | 1.80E-05    | 30.13089456 |
| SPECC1L-ADORA2A | NR_103546    | 194.550837  | 1.622147513 | 1.65E-19    | 119.9341215 |
| LOC100506804    | NR_040081    | 101.5907364 | 0.960183002 | 5.25E-14    | 105.8035148 |
| SCD5            | NM_024906    | 81.3256137  | 1.689053009 | 1.26E-07    | 48.14864498 |
| EML2            | NM_012155    | 69.10167405 | 8.522075062 | 5.71E-05    | 8.108550271 |
| CBWD6           | NM_001085457 | 24.4478793  | 0.660291838 | 0.003839443 | 37.02586933 |

|              |              |             |             |             |             |
|--------------|--------------|-------------|-------------|-------------|-------------|
| MRPL32       | NM_031903    | 101.8558592 | 3.052939552 | 2.98E-11    | 33.36320862 |
| CBR3         | NM_001236    | 58.46847084 | 5.075813361 | 6.49E-05    | 11.51903482 |
| ZNF296       | NM_145288    | 144.1827566 | 12.29331033 | 1.96E-10    | 11.7285542  |
| PLEKHO2      | NM_001195059 | 135.8764507 | 4.169115729 | 2.47E-13    | 32.59119189 |
| PAXBPI-AS1   | NR_038879    | 101.5907364 | 3.153583672 | 2.03E-10    | 32.214378   |
| OAT          | NM_000274    | 215.8764507 | 3.814110361 | 1.82E-22    | 56.59942433 |
| RC3H2        | NM_018835    | 137.9382254 | 1.933849063 | 1.58E-14    | 71.32833064 |
| ZNF575       | NM_174945    | 94.81595977 | 6.558451786 | 8.71E-08    | 14.45706439 |
| MKL1         | NM_001282662 | 143.3873883 | 0.620746145 | 4.51E-16    | 230.9919915 |
| SUSD1        | NM_001282643 | 51.95881691 | 1.478667759 | 9.32E-05    | 35.1389395  |
| ATG13        | NM_001205119 | 40.79536822 | 2.699236214 | 0.001199853 | 15.11367105 |
| EMP2         | NM_001424    | 124.713002  | 1.604042507 | 1.99E-13    | 77.74918777 |
| MAD2L1BP     | NM_001003690 | 75.61132799 | 13.25862955 | 0.000162637 | 5.70280116  |
| UBAC2        | NM_001144072 | 147.5701449 | 2.142157082 | 1.95E-14    | 68.88857317 |
| ABCC4        | NM_005845    | 115.3462052 | 0.732331233 | 1.60E-12    | 157.5055113 |
| TTC1         | NM_001282500 | 49.89704227 | 1.775151351 | 0.000138835 | 28.10861296 |
| OTUD6B       | NM_016023    | 46.77477667 | 2.935324728 | 0.000179245 | 15.93512848 |
| THAP9-AS1    | NR_034077    | 101.8558592 | 9.635893681 | 1.12E-07    | 10.57046316 |
| H3F3A        | NM_002107    | 134.2857143 | 5.509469124 | 1.94E-12    | 24.37362135 |
| TMEM141      | NM_032928    | 118.4684708 | 13.13654315 | 1.84E-07    | 9.018237862 |
| TMEM41A      | NM_080652    | 162.9163501 | 4.353077348 | 1.37E-16    | 37.42555831 |
| DAD1         | NM_001344    | 106.7747767 | 2.9068278   | 3.05E-10    | 36.73240522 |
| IQGAP2       | NM_006633    | 41.85585918 | 0.304695465 | 6.26E-05    | 137.3694852 |
| ANXA5        | NM_001154    | 189.8970423 | 1.688307834 | 9.20E-23    | 112.4777356 |
| MID2         | NM_012216    | 48.83655131 | 0.51071039  | 9.56E-06    | 95.62474598 |
| C18orf32     | NM_001035005 | 167.0398994 | 4.411245262 | 2.59E-17    | 37.86683567 |
| SH2B3        | NM_005475    | 86.77477667 | 4.35581598  | 2.24E-07    | 19.92158922 |
| CGN          | NM_020770    | 103.3873883 | 1.139664398 | 4.82E-12    | 90.71739762 |
| PPP5C        | NM_006247    | 90.16216501 | 0.884692041 | 3.47E-10    | 101.9136161 |
| DRAM1        | NM_018370    | 153.5495533 | 0.713969078 | 4.40E-19    | 215.0647108 |
| LOC728730    | NR_037875    | 164.4478793 | 0.306802516 | 5.86E-21    | 536.0056414 |
| ZNF224       | NM_013398    | 66.77477667 | 0.177721874 | 4.00E-10    | 375.7262701 |
| NDUFS7       | NM_024407    | 121.060491  | 5.276334956 | 3.03E-11    | 22.9440496  |
| TNIP2        | NM_001292016 | 157.6731026 | 3.359070043 | 2.55E-17    | 46.93951022 |
| CASP3        | NM_032991    | 71.69369417 | 0.666732203 | 9.10E-09    | 107.5299705 |
| ZNF576       | NM_024327    | 53.54955335 | 7.725895492 | 0.000940032 | 6.931177545 |
| UBXN2A       | NM_181713    | 98.46847084 | 0.612125615 | 2.85E-12    | 160.8631765 |
| LYPLAL1-AS1  | NR_038845    | 30.16216501 | 0.441916281 | 0.000855517 | 68.25312018 |
| ISOC1        | NM_016048    | 181.5907364 | 0.742721558 | 3.19E-26    | 244.4936929 |
| SGK3         | NM_001033578 | 95.34620525 | 1.565832628 | 4.21E-09    | 60.89169655 |
| INTS5        | NM_030628    | 245.773493  | 11.40165427 | 4.53E-22    | 21.55595032 |
| TMEM53       | NM_024587    | 87.03989941 | 2.665917662 | 4.58E-09    | 32.64913266 |
| ZNF398       | NM_170686    | 106.2445312 | 1.743086111 | 2.05E-11    | 60.95196933 |
| HSF2BP       | NM_007031    | 83.91763382 | 0.148558151 | 2.92E-11    | 564.8807105 |
| PGPEP1       | NM_017712    | 57.93822536 | 5.571138531 | 0.000129368 | 10.39971005 |
| SNX3         | NM_152827    | 135.611328  | 1.979545864 | 3.30E-14    | 68.50628241 |
| CBWD3        | NM_201453    | 70.42728775 | 0.11651424  | 6.15E-11    | 604.452192  |
| MAGEB2       | NM_002364    | 63.65251108 | 3.450296112 | 8.22E-06    | 18.44841979 |
| HSP90AA1     | NM_001017963 | 129.3667968 | 6.778202914 | 1.61E-10    | 19.08570729 |
| FOXA3        | NM_004497    | 60.26512274 | 5.276957962 | 0.000122466 | 11.42042881 |
| ZCCHC11      | NM_015269    | 105.7142857 | 0.250119006 | 1.10E-13    | 422.6559493 |
| MTERF1       | NM_001301135 | 85.773493   | 3.183192335 | 4.31E-09    | 26.94574627 |
| UBE2G1       | NM_003342    | 180.2651227 | 1.657215509 | 9.87E-19    | 108.7759086 |
| CREG2        | NM_153836    | 58.99871632 | 0.702003763 | 1.31E-07    | 84.04330492 |
| MIPEPP3      | NR_038939    | 98.73359358 | 1.336331896 | 4.20E-11    | 73.88403574 |
| HPRT1        | NM_000194    | 71.95881691 | 0.673095106 | 3.62E-09    | 106.9073542 |
| RHOG         | NM_001665    | 114.550837  | 8.243787778 | 4.23E-09    | 13.89541314 |
| TGFA         | NM_003236    | 100.5302455 | 1.597043228 | 7.39E-10    | 62.94772974 |
| TCP11L2      | NM_152772    | 32.22393965 | 1.09081329  | 0.000921484 | 29.54120558 |
| ZNF343       | NM_001282496 | 71.95881691 | 1.224449188 | 8.57E-08    | 58.76831607 |
| ZNF623       | NM_001082480 | 110.6924105 | 2.044977546 | 5.34E-13    | 54.12891241 |
| DCAF17       | NR_028482    | 147.8352676 | 1.280254566 | 1.15E-16    | 115.4733376 |
| ZC3H4        | NM_015168    | 81.85585918 | 3.98512897  | 4.30E-07    | 20.54032875 |
| LOC100270804 | NR_026885    | 53.81467609 | 10.82603747 | 0.004439934 | 4.970856255 |

|              |              |             |             |             |             |
|--------------|--------------|-------------|-------------|-------------|-------------|
| CCNT2        | NR_037649    | 61.3256137  | 1.168061694 | 3.98E-06    | 52.50203307 |
| UBE3A        | NM_000462    | 94.81595977 | 0.757225365 | 5.09E-11    | 125.2149811 |
| C19orf52     | NM_138358    | 109.6319195 | 13.59589636 | 1.77E-06    | 8.063603649 |
| TTC28-AS1    | NR_026963    | 81.59073644 | 0.631553921 | 5.49E-10    | 129.1904519 |
| RSL24D1      | NM_016304    | 46.77477667 | 1.571304756 | 8.74E-05    | 29.76811245 |
| ZBED5        | NM_001143667 | 126.5096539 | 2.585048874 | 3.62E-14    | 48.93897953 |
| RASA1        | NM_002890    | 81.3256137  | 1.055125786 | 5.50E-09    | 77.07670004 |
| CCDC3        | NM_031455    | 29.36679679 | 0.77512968  | 0.002299602 | 37.88630156 |
| SEC24D       | NM_014822    | 137.6731026 | 0.687694856 | 2.94E-16    | 200.1950448 |
| USP18        | NM_017414    | 115.8764507 | 1.741774628 | 3.05E-13    | 66.52780953 |
| GIN1         | NM_017676    | 93.01930787 | 0.532640038 | 9.31E-12    | 174.6382195 |
| RNGTT        | NM_001286426 | 84.18275656 | 0.088780755 | 1.41E-10    | 948.2095113 |
| WDR13        | NM_017883    | 49.36679679 | 4.469452877 | 0.000319823 | 11.04537807 |
| LOC101926941 | NR_120664    | 89.36679679 | 3.162423827 | 2.39E-08    | 28.25895632 |
| CCDC124      | NM_001136203 | 144.1827566 | 5.090978537 | 3.26E-14    | 28.32122656 |
| RANBP2       | NM_006267    | 165.2432475 | 0.934506795 | 5.70E-19    | 176.8240193 |
| POLM         | NM_001284330 | 137.9382254 | 5.341146207 | 1.66E-13    | 25.825585   |
| C17orf70     | NR_033338    | 187.8352676 | 6.044179936 | 3.12E-18    | 31.07704761 |
| EIF5B        | NM_015904    | 122.3861047 | 1.659286214 | 8.39E-13    | 73.7582845  |
| C4orf32      | NM_152400    | 134.8159598 | 1.365971888 | 4.94E-15    | 98.69599873 |
| KLHL9        | NM_018847    | 115.611328  | 4.511519093 | 6.11E-11    | 25.62580931 |
| RBM26        | NM_001286631 | 55.08108251 | 0.536776909 | 1.70E-06    | 102.6144783 |
| MYC          | NM_002467    | 155.611328  | 34.98252773 | 8.05E-07    | 4.448258548 |
| NOL10        | NM_001261394 | 57.67310262 | 1.207957965 | 2.06E-06    | 47.74429597 |
| NFKBIE       | NM_004556    | 84.4478793  | 9.299878446 | 1.65E-06    | 9.080535815 |
| C5orf63      | NM_001164479 | 71.95881691 | 0.261237548 | 9.44E-11    | 275.453576  |
| KATNAL1      | NM_032116    | 36.40669621 | 1.0223585   | 0.000283128 | 35.61049887 |
| FLCN         | NM_144997    | 93.28443061 | 3.291987116 | 8.70E-09    | 28.33681522 |
| NASP         | NM_002482    | 187.0398994 | 3.815831678 | 1.44E-18    | 49.0168108  |
| FOCAD        | NM_017794    | 60.53024548 | 0.917673393 | 1.40E-06    | 65.96055406 |
| RAP1B        | NM_015646    | 75.08108251 | 0.421912971 | 7.14E-10    | 177.9539564 |
| TAF1B        | NM_005680    | 118.2033481 | 0.584493354 | 2.34E-14    | 202.2321506 |
| SPG7         | NM_003119    | 212.7541851 | 4.42363215  | 1.57E-20    | 48.09490887 |
| SERPINB1     | NM_030666    | 47.57014489 | 3.284363025 | 0.000299227 | 14.4838267  |
| ZCCHC7       | NM_001289120 | 148.8365513 | 0.387295833 | 2.19E-17    | 384.2968052 |
| PROS1        | NM_000313    | 80.53024548 | 0.138928205 | 2.70E-11    | 579.6536831 |
| ARHGEF5      | NM_005435    | 232.5482697 | 2.83345576  | 5.92E-26    | 82.07231358 |
| ETS2         | NM_001256295 | 124.713002  | 6.855919884 | 6.17E-11    | 18.19055709 |
| DHDH         | NM_014475    | 209.1016741 | 0.494607855 | 1.90E-32    | 422.762542  |
| MCM4         | NM_005914    | 103.9176338 | 4.874490354 | 1.05E-09    | 21.31866642 |
| ARHGEF17     | NM_014786    | 39.26383906 | 2.093968757 | 0.001137205 | 18.75091924 |
| PLEKHA1      | NM_001001974 | 130.6924105 | 1.860660238 | 9.32E-14    | 70.23980402 |
| TMC7         | NM_001160364 | 30.42728775 | 1.070222461 | 0.00112734  | 28.43080653 |
| TRAFD1       | NM_001143906 | 136.1415735 | 2.949649944 | 9.96E-14    | 46.15516284 |
| NKAP         | NM_024528    | 61.06049096 | 0.943007755 | 6.50E-07    | 64.7507835  |
| TMEM131      | NM_015348    | 82.85714286 | 0.619504935 | 3.04E-09    | 133.7473492 |
| BTG1         | NM_001731    | 155.0810825 | 8.221929105 | 1.25E-13    | 18.86188515 |
| LINC00265    | NR_026999    | 84.71300204 | 0.181664792 | 1.42E-12    | 466.3149143 |
| GAS6-AS1     | NR_044995    | 109.3667968 | 8.831012028 | 4.54E-08    | 12.38440129 |
| TIGD3        | NM_145719    | 137.6731026 | 6.387749875 | 2.44E-12    | 21.55267587 |
| MAML1        | NM_014757    | 87.83526763 | 1.194406006 | 1.80E-09    | 73.53886972 |
| LLGL2        | NM_001015002 | 200.5302455 | 4.20446341  | 8.76E-20    | 47.69461069 |
| LOC100272217 | NR_027440    | 158.2033481 | 12.54568224 | 1.09E-11    | 12.61018293 |
| UGDH-AS1     | NR_047679    | 135.611328  | 1.819803167 | 6.20E-14    | 74.519778   |
| KCNG3        | NM_172344    | 109.6319195 | 0.210351229 | 2.92E-16    | 521.1850689 |
| TLCD2        | NM_001164407 | 80.79536822 | 5.966396911 | 6.41E-07    | 13.54173539 |
| MRPS15       | NM_031280    | 76.40669621 | 2.469791457 | 4.12E-08    | 30.93649708 |
| PRKRIP1      | NM_024653    | 103.6525111 | 3.553857341 | 1.64E-09    | 29.16619919 |
| CLDN23       | NM_194284    | 49.10167405 | 6.462915361 | 0.003376666 | 7.59744965  |
| FAM222A      | NM_032829    | 25.97940845 | 0.10168728  | 0.001095033 | 255.483365  |
| DNMT3A       | NM_175629    | 30.42728775 | 1.189287911 | 0.001242056 | 25.58445895 |
| C11orf31     | NM_170746    | 140.7953682 | 20.05363996 | 9.54E-08    | 7.020938267 |
| RPS15A       | NM_001019    | 110.6924105 | 12.59581585 | 1.01E-07    | 8.788030234 |
| ADPGK        | NR_023319    | 147.8352676 | 3.368801194 | 1.23E-14    | 43.88364261 |

|              |              |             |             |             |             |
|--------------|--------------|-------------|-------------|-------------|-------------|
| FBXL5        | NM_001193535 | 98.2033481  | 0.110838067 | 1.62E-15    | 886.007402  |
| CLDN12       | NM_001185072 | 40.53024548 | 3.595780718 | 0.003224724 | 11.27161211 |
| GART         | NM_001136006 | 83.91763382 | 4.898749604 | 4.18E-07    | 17.13041911 |
| CRTC3        | NM_001042574 | 169.1016741 | 1.005263025 | 5.59E-18    | 168.2163472 |
| NKTR         | NM_005385    | 123.3873883 | 1.177379179 | 1.12E-13    | 104.7983441 |
| EPN2         | NM_148921    | 169.1016741 | 2.201504915 | 4.83E-17    | 76.81185396 |
| CAMK1        | NM_003656    | 126.5096539 | 6.1377225   | 1.41E-11    | 20.61182367 |
| RAB40C       | NM_001172663 | 34.28571429 | 0.404196633 | 0.000180826 | 84.82434405 |
| PSMD4        | NM_002810    | 138.9987163 | 0.847603098 | 9.55E-19    | 163.9903354 |
| PRKX         | NM_005044    | 51.69369417 | 0.42276493  | 3.69E-06    | 122.2752656 |
| GOLGA7       | NM_016099    | 49.63191953 | 0.63091907  | 1.46E-05    | 78.66606335 |
| DTWD1        | NM_001144955 | 183.3873883 | 0.798161635 | 3.82E-25    | 229.762219  |
| SRSF11       | NM_001190987 | 69.10167405 | 3.04969073  | 1.37E-06    | 22.65858415 |
| ABHD10       | NM_001272069 | 115.3462052 | 5.913878497 | 3.73E-10    | 19.5043245  |
| PICALM       | NM_007166    | 61.3256137  | 1.161096287 | 9.39E-07    | 52.81699234 |
| TLN1         | NM_006289    | 86.50965393 | 1.3321735   | 2.90E-09    | 64.93872901 |
| LOC101929224 | NR_110787    | 89.10167405 | 2.615057925 | 2.77E-09    | 34.07254317 |
| ZNF165       | NM_003447    | 109.1016741 | 2.8370292   | 3.13E-12    | 38.45630987 |
| GDAP2        | NM_017686    | 74.81595977 | 1.12777155  | 1.66E-07    | 66.33964099 |
| C2orf42      | NM_017880    | 109.1016741 | 3.995656284 | 7.99E-10    | 27.30506988 |
| PEBP1        | NM_002567    | 103.9176338 | 3.162242693 | 4.06E-11    | 32.86200457 |
| C21orf2      | NM_001271441 | 95.87645073 | 6.334068079 | 1.66E-08    | 15.13663092 |
| MAP3K5       | NM_005923    | 51.95881691 | 0.564859057 | 8.33E-06    | 91.98545418 |
| RHBDD2       | NM_001040457 | 206.5096539 | 7.034646114 | 1.09E-19    | 29.35608282 |
| ACOX1        | NM_004035    | 84.71300204 | 4.396928762 | 1.91E-07    | 19.26640312 |
| RRP15        | NM_016052    | 98.73359358 | 0.963007293 | 5.82E-11    | 102.5263197 |
| LANCL3       | NM_198511    | 27.03989941 | 0.20032137  | 0.002928124 | 134.9826    |
| PDE3B        | NM_000922    | 103.6525111 | 0.133890933 | 2.43E-13    | 774.1563104 |
| KLHDC4       | NM_017566    | 88.89575859 | 0.331832981 | 4.18E-12    | 267.893078  |
| SEC63        | NM_007214    | 106.5096539 | 1.304771059 | 9.90E-11    | 81.63091384 |
| SNRK         | NM_017719    | 111.9588169 | 1.110505854 | 6.45E-12    | 100.8178538 |
| RNF13        | NM_007282    | 235.0810825 | 0.828697428 | 3.04E-27    | 283.6754099 |
| UBE2L3       | NR_046082    | 95.08108251 | 2.187378156 | 1.99E-09    | 43.46805889 |
| GOLGA8B      | NR_027410    | 50.16216501 | 2.002703269 | 7.55E-05    | 25.04722781 |
| MRPL37       | NM_016491    | 115.611328  | 0.705597343 | 1.96E-15    | 163.848871  |
| PPAT         | NM_002703    | 136.1415735 | 0.980833666 | 3.67E-16    | 138.801897  |
| CHAF1B       | NM_005441    | 106.5096539 | 0.215997212 | 1.05E-16    | 493.1066136 |
| DOCK7        | NM_001272002 | 47.03989941 | 0.691038858 | 2.58E-05    | 68.07127974 |
| OSBPL6       | NM_001201480 | 184.1827566 | 0.681514568 | 1.01E-20    | 270.2550541 |
| SLC25A24     | NM_013386    | 157.9382254 | 0.787600207 | 2.51E-18    | 200.5309597 |
| CPSF6        | NM_007007    | 101.060491  | 1.389937386 | 5.14E-11    | 72.7086644  |
| RPL36A       | NM_021029    | 71.95881691 | 10.79738172 | 0.00012058  | 6.664469108 |
| C9orf114     | NM_016390    | 99.26383906 | 6.485484985 | 7.88E-09    | 15.30553833 |
| NEIL2        | NM_145043    | 103.1222656 | 2.501243736 | 1.63E-10    | 41.22839534 |
| GAS8         | NM_001286209 | 85.97940845 | 7.731086612 | 1.23E-06    | 11.12125795 |
| SBF2         | NM_030962    | 141.5907364 | 0.022559062 | 1.25E-21    | 6276.445975 |
| SLC5A3       | NM_006933    | 117.6731026 | 0.987859799 | 6.05E-14    | 119.1192341 |
| ZHX1-C8orf76 | NM_001204180 | 94.81595977 | 2.607450185 | 2.03E-09    | 36.36347889 |
| EP300-AS1    | NR_110514    | 69.10167405 | 3.781139746 | 2.60E-06    | 18.27535576 |
| ZFP62        | NM_001172638 | 124.1827566 | 5.323164316 | 2.42E-11    | 23.32874756 |
| ALAD         | NM_000031    | 92.22393965 | 2.98803708  | 4.65E-09    | 30.86438929 |
| PIGO         | NM_032634    | 106.5096539 | 6.434395944 | 4.80E-09    | 16.55317063 |
| SAP30BP      | NM_013260    | 81.3256137  | 5.036805866 | 8.54E-07    | 16.14626727 |
| MCL1         | NM_182763    | 129.8970423 | 13.53490032 | 3.02E-09    | 9.597192387 |
| ATE1-AS1     | NR_120495    | 121.060491  | 1.139120067 | 1.09E-14    | 106.275444  |
| SLC44A1      | NM_001286730 | 72.75418513 | 0.383289635 | 1.80E-08    | 189.8151645 |
| KIAA1551     | NM_018169    | 86.50965393 | 1.806309442 | 5.30E-09    | 47.89304198 |
| CCDC51       | NM_001256968 | 72.75418513 | 6.907576631 | 8.30E-06    | 10.53251944 |
| CHERP        | NM_006387    | 65.50837026 | 3.166874982 | 1.62E-06    | 20.68549299 |
| RECQL5       | NM_004259    | 47.57014489 | 1.11494816  | 7.95E-05    | 42.66579076 |
| KIF21A       | NM_017641    | 127.3050222 | 0.751491551 | 1.13E-14    | 169.4031316 |
| CDC42SE2     | NM_001038702 | 193.0193079 | 1.526868936 | 5.58E-20    | 126.4151122 |
| COL12A1      | NM_080645    | 56.40669621 | 0.997506162 | 1.86E-06    | 56.54771702 |
| ACOT13       | NM_018473    | 163.6525111 | 2.49435979  | 1.08E-17    | 65.60902391 |

|                 |              |             |             |             |             |
|-----------------|--------------|-------------|-------------|-------------|-------------|
| AFF1            | NM_001166693 | 183.9176338 | 2.225632307 | 7.64E-18    | 82.63612691 |
| ARHGAP19-SLIT1  | NR_037909    | 100.7953682 | 0.792333823 | 2.24E-11    | 127.2132594 |
| SNRPA           | NM_004596    | 104.713002  | 8.858354566 | 3.89E-08    | 11.82081856 |
| COX11           | NR_027942    | 163.6525111 | 9.189464241 | 6.56E-14    | 17.8087108  |
| PPP6R3          | NM_001164162 | 63.38738834 | 2.326382943 | 8.06E-06    | 27.24718582 |
| RSPH3           | NM_031924    | 150.4272878 | 2.353760611 | 2.47E-16    | 63.90934024 |
| TAF11           | NM_001270488 | 101.5907364 | 4.633245116 | 1.49E-09    | 21.9264757  |
| RAB22A          | NM_020673    | 154.2857143 | 1.16332853  | 2.50E-17    | 132.6243708 |
| VPS13D          | NM_018156    | 75.34620525 | 0.57840667  | 2.95E-08    | 130.2651043 |
| NAAA            | NM_001042402 | 116.6718189 | 1.653621886 | 3.87E-13    | 70.55531855 |
| STK38           | NM_007271    | 184.9781248 | 1.377055655 | 4.11E-21    | 134.3287209 |
| TMEM117         | NM_032256    | 107.3050222 | 0.057567608 | 4.40E-14    | 1863.982655 |
| CRCP            | NR_024548    | 76.67181894 | 0.752777857 | 1.23E-08    | 101.8518521 |
| C11orf71        | NM_019021    | 124.1827566 | 4.798665167 | 3.58E-12    | 25.8786042  |
| PLEK2           | NM_016445    | 89.63191953 | 4.694679749 | 6.62E-08    | 19.09223298 |
| FAM189B         | NM_198264    | 69.36679679 | 3.305601511 | 9.23E-07    | 20.98462158 |
| NDUFB4          | NM_004547    | 88.36551311 | 0.923154652 | 6.11E-12    | 95.72124555 |
| ANKHD1-EIF4EBP3 | NM_020690    | 75.87645073 | 1.69583145  | 2.57E-07    | 44.7429199  |
| DEPDC1          | NM_001114120 | 60.26512274 | 3.109294461 | 6.41E-06    | 19.38225006 |
| PIN4            | NM_006223    | 29.89704227 | 0.666429867 | 0.000760067 | 44.8614982  |
| POLR2F          | NM_001301129 | 115.0810825 | 2.412928552 | 3.23E-12    | 47.69353091 |
| KBTBD4          | NR_024222    | 140.7953682 | 8.028635127 | 2.80E-12    | 17.5366505  |
| ZNF543          | NM_213598    | 98.46847084 | 2.381399263 | 1.19E-10    | 41.34899695 |
| LOC100506713    | NR_040089    | 39.26383906 | 3.742869911 | 0.001062464 | 10.49030289 |
| MRPL3           | NM_007208    | 90.42728775 | 0.687612248 | 1.21E-10    | 131.5091288 |
| MTHFD2L         | NM_001144978 | 120.7953682 | 1.010808688 | 2.02E-13    | 119.5036901 |
| SPTAN1          | NM_001130438 | 227.0398994 | 2.765907376 | 2.80E-23    | 82.08514189 |
| SETD6           | NM_001160305 | 149.6319195 | 22.61189323 | 1.65E-08    | 6.617398994 |
| MARVELD2        | NM_001244734 | 172.2239396 | 1.612773574 | 1.03E-20    | 106.7874266 |
| SARS2           | NM_001145901 | 40.05920728 | 5.564234166 | 0.004310671 | 7.199410752 |
| ARIH2           | NM_006321    | 124.4478793 | 2.242714575 | 9.49E-13    | 55.48984283 |
| MFNG            | NM_002405    | 33.28443061 | 1.850444275 | 0.002485253 | 17.98726449 |
| PIDD1           | NM_145887    | 95.61132799 | 8.810597195 | 4.80E-07    | 10.85185554 |
| AFG3L2          | NM_006796    | 175.3462052 | 2.208045678 | 7.84E-19    | 79.4123994  |
| SPAG5-AS1       | NR_040012    | 195.3462052 | 7.021947951 | 1.13E-17    | 27.81937528 |
| CLEC16A         | NM_001243403 | 125.9794085 | 1.669136872 | 3.04E-12    | 75.47578065 |
| KLF10           | NM_005655    | 66.83398396 | 6.545229345 | 2.74E-05    | 10.21109887 |
| PHF20           | NM_016436    | 37.40797988 | 1.221840505 | 0.000333685 | 30.61609084 |
| SLC52A2         | NM_001253816 | 198.4684708 | 13.23557514 | 3.15E-15    | 14.99507719 |
| XPNPEP3         | NM_022098    | 109.1016741 | 1.635638906 | 5.10E-11    | 66.70278731 |
| HSBP1           | NM_001537    | 84.97812478 | 9.596221063 | 3.24E-06    | 8.85537382  |
| MRPS25          | NM_022497    | 204.713002  | 4.815728695 | 3.99E-21    | 42.5092473  |
| STIL            | NM_001282937 | 146.5096539 | 0.531848447 | 3.30E-19    | 275.4725613 |
| UBE2M           | NM_003969    | 122.6512274 | 9.286819312 | 5.80E-10    | 13.20702205 |
| ATG7            | NM_001136031 | 52.48906239 | 0.857339404 | 1.04E-05    | 61.2232007  |
| PTK7            | NM_152882    | 134.8159598 | 0.882959536 | 5.79E-16    | 152.6864531 |
| SPIN4           | NM_001012968 | 74.81595977 | 3.514010597 | 1.66E-07    | 21.290761   |
| ADAT1           | NR_036460    | 104.4478793 | 1.077256682 | 1.12E-12    | 96.95728147 |
| LINC01234       | NR_110025    | 57.67310262 | 1.111007015 | 5.06E-06    | 51.91065568 |
| TOMM22          | NM_020243    | 103.9176338 | 12.86617196 | 7.97E-07    | 8.076810578 |
| AZIN1           | NM_015878    | 250.4272878 | 5.032776748 | 3.44E-24    | 49.75926815 |
| NEDD8-MDP1      | NM_001199823 | 124.1827566 | 7.93744905  | 8.68E-10    | 15.64517212 |
| HNRNPUL2-BSCL2  | NR_037946    | 141.8558592 | 8.966072618 | 3.35E-11    | 15.82140422 |
| PLCE1           | NM_001288989 | 83.65251108 | 0.107329988 | 2.17E-10    | 779.395514  |
| SCAF4           | NM_001145445 | 126.5096539 | 2.277287846 | 8.13E-13    | 55.55277263 |
| NDEL1           | NM_001025579 | 149.3667968 | 1.594870835 | 3.39E-17    | 93.65447879 |
| NOSIP           | NM_001270960 | 193.5495533 | 5.787756362 | 2.44E-18    | 33.4412061  |
| RHBDD1          | NM_001167608 | 112.2239396 | 1.275030394 | 5.82E-11    | 88.016678   |
| ZNF205          | NM_001042428 | 120.7953682 | 3.104374035 | 6.98E-13    | 38.91134472 |
| C1orf50         | NR_040733    | 142.3861047 | 2.340673776 | 1.03E-16    | 60.83124703 |
| DHX8            | NM_004941    | 87.03989941 | 0.158963546 | 1.44E-13    | 547.5462864 |
| UBE2D2          | NM_003339    | 91.95881691 | 1.88132384  | 4.26E-09    | 48.87984457 |
| AP4B1           | NM_001253852 | 89.63191953 | 3.62938738  | 6.10E-09    | 24.69615672 |
| TROAP           | NM_001100620 | 91.95881691 | 10.64164478 | 4.22E-05    | 8.641410121 |



|            |              |             |             |             |             |
|------------|--------------|-------------|-------------|-------------|-------------|
| BRAT1      | NM_152743    | 75.08108251 | 5.134902507 | 1.60E-06    | 14.62171529 |
| DOLPP1     | NM_001135917 | 78.2033481  | 3.487527885 | 1.23E-07    | 22.4237198  |
| NLRP2      | NM_001174082 | 49.10167405 | 2.207246845 | 0.000119038 | 22.24566508 |
| CBX1       | NM_006807    | 102.6512274 | 2.17693195  | 5.89E-11    | 47.15408186 |
| SLC25A37   | NM_016612    | 97.93822536 | 2.532073424 | 7.93E-10    | 38.67906216 |
| BLVRB      | NM_000713    | 141.5907364 | 7.331823423 | 8.36E-13    | 19.31180394 |
| KDEL2      | NM_153705    | 75.34620525 | 1.466518652 | 5.04E-08    | 51.37759766 |
| PSMD13     | NM_175932    | 96.14157347 | 4.96902989  | 3.95E-09    | 19.34815761 |
| CLK3       | NM_001130028 | 58.73359358 | 12.74375855 | 0.00276793  | 4.60881249  |
| ATP8B3     | NR_047593    | 49.63191953 | 2.409786159 | 0.000115037 | 20.59598498 |
| CDA        | NM_001785    | 39.26383906 | 0.968616442 | 0.000518475 | 40.53600307 |
| TMEM68     | NM_152417    | 161.3256137 | 0.669116442 | 5.81E-21    | 241.1024503 |
| PALB2      | NM_024675    | 121.5907364 | 2.402562691 | 5.76E-13    | 50.60876742 |
| ERMP1      | NM_024896    | 149.3667968 | 2.241835664 | 9.64E-16    | 66.62700536 |
| FNTB       | NM_002028    | 60.79536822 | 2.318382493 | 1.21E-05    | 26.22318293 |
| PPP1CC     | NM_001244974 | 140.7953682 | 5.326031717 | 1.44E-12    | 26.4353229  |
| ANKRD6     | NM_014942    | 65.71428571 | 0.526231849 | 1.81E-07    | 124.877059  |
| COQ10B     | NM_025147    | 152.7541851 | 2.918802301 | 5.50E-16    | 52.33454321 |
| NOB1       | NR_074074    | 152.7541851 | 6.273053585 | 1.24E-13    | 24.35084972 |
| ZC2HC1A    | NM_016010    | 229.3667968 | 1.154062212 | 2.41E-27    | 198.7473417 |
| ELAC2      | NM_173717    | 104.713002  | 4.095118691 | 7.91E-10    | 25.57019953 |
| NBPF1      | NM_017940    | 315.935658  | 2.953369017 | 5.24E-34    | 106.9746639 |
| NR1H2      | NM_007121    | 101.060491  | 6.831560259 | 1.54E-08    | 14.79317859 |
| DCP1B      | NM_152640    | 83.91763382 | 0.739922759 | 3.48E-10    | 113.414046  |
| TRPM4      | NM_001195227 | 174.550837  | 3.371487228 | 9.14E-17    | 51.77265261 |
| PPAN       | NM_020230    | 52.22393965 | 3.434404139 | 5.51E-05    | 15.20611365 |
| UFL1       | NM_015323    | 119.7940845 | 0.470603544 | 7.43E-16    | 254.5541486 |
| THAP1      | NM_199003    | 60.53024548 | 7.409723571 | 0.000421494 | 8.16902883  |
| MRPL42     | NR_038161    | 106.5096539 | 1.689084461 | 2.05E-11    | 63.05762465 |
| BPTF       | NM_004459    | 37.14285714 | 1.286738164 | 0.000330021 | 28.86590152 |
| CNIH4      | NM_001277200 | 55.61132799 | 2.233179747 | 1.97E-05    | 24.90230715 |
| COA5       | NM_001008215 | 118.2033481 | 2.629883238 | 1.59E-13    | 44.94623426 |
| MIR181A2HG | NR_038975    | 47.30502215 | 0.40919212  | 1.87E-06    | 115.6058972 |
| CDKN2B     | NM_078487    | 148.1003904 | 1.489952986 | 1.47E-19    | 99.39937151 |
| ABCF3      | NM_018358    | 58.46847084 | 2.851674953 | 1.80E-05    | 20.50320314 |
| WASF1      | NM_003931    | 55.61132799 | 1.431890552 | 3.78E-05    | 38.83769463 |
| ZNF775     | NM_173680    | 63.91763382 | 0.821583098 | 2.24E-07    | 77.79813628 |
| DDX23      | NM_004818    | 61.59073644 | 0.67317278  | 1.92E-07    | 91.49320687 |
| XPA        | NR_027302    | 141.3256137 | 4.740038966 | 1.07E-13    | 29.81528521 |
| PTPN1      | NM_002827    | 101.060491  | 2.27257075  | 7.28E-10    | 44.46967865 |
| RABIF      | NM_002871    | 115.611328  | 9.805263727 | 1.74E-08    | 11.7907413  |
| CDC26      | NM_139286    | 104.1827566 | 6.421763545 | 1.28E-08    | 16.22338721 |
| PPP2R3B    | NM_013239    | 28.83655131 | 0.282497738 | 0.000999748 | 102.0771052 |
| MCAT       | NM_173467    | 137.9382254 | 6.902635219 | 4.33E-12    | 19.98341517 |
| EXOC2      | NR_073064    | 78.2033481  | 0.057915197 | 4.37E-11    | 1350.307898 |
| FARP2      | NM_014808    | 140.5302455 | 2.118431457 | 9.65E-14    | 66.33693293 |
| ORAOV1     | NM_153451    | 90.95753323 | 3.47801087  | 2.04E-09    | 26.15217049 |
| MAPKAPK5   | NM_139078    | 93.01930787 | 1.111135592 | 4.29E-10    | 83.71553256 |
| EMC3       | NM_018447    | 67.30502215 | 1.992944914 | 3.55E-07    | 33.771642   |
| ZBTB49     | NM_145291    | 123.9176338 | 1.362855924 | 3.82E-14    | 90.92496986 |
| GNAQ       | NM_002072    | 29.10167405 | 0.079358157 | 0.001433935 | 366.7130804 |
| RNF135     | NM_001184992 | 157.6731026 | 2.617965288 | 2.65E-16    | 60.22734653 |
| MOB1A      | NM_018221    | 149.8970423 | 2.527444757 | 8.39E-16    | 59.30774229 |
| THUMP2D    | NR_028102    | 140         | 1.093799525 | 3.04E-16    | 127.9942044 |
| RPL36AL    | NM_001001    | 141.3256137 | 19.78637614 | 6.94E-08    | 7.142571875 |
| TUBA4A     | NM_006000    | 167.5701449 | 19.22227394 | 5.42E-11    | 8.717498535 |
| FDPS       | NM_001135822 | 64.18275656 | 7.202789642 | 0.000105021 | 8.910819244 |
| EIF3G      | NM_003755    | 67.03989941 | 12.64682115 | 0.00125943  | 5.300928877 |
| LRRC1      | NM_018214    | 87.03989941 | 0.725038112 | 7.63E-10    | 120.0487229 |
| RABGGTB    | NR_073562    | 152.7541851 | 16.62254555 | 4.67E-10    | 9.189578378 |
| TNPO1      | NM_153188    | 189.3667968 | 1.719311122 | 2.10E-20    | 110.1410876 |
| PCK2       | NM_001291556 | 126.5096539 | 12.93216978 | 7.46E-09    | 9.782554364 |
| PIN1       | NR_038830    | 50.16216501 | 3.358529277 | 0.000224518 | 14.93575338 |
| PEX13      | NM_002618    | 121.3256137 | 1.661978758 | 2.75E-13    | 73.00070058 |

|                |              |             |             |             |             |
|----------------|--------------|-------------|-------------|-------------|-------------|
| TAF12          | NM_005644    | 208.8365513 | 2.105856359 | 1.16E-23    | 99.16941886 |
| RPS3           | NM_001260506 | 155.611328  | 9.870825393 | 1.14E-12    | 15.76477364 |
| ARL5B          | NM_178815    | 115.0810825 | 1.756824506 | 1.49E-13    | 65.50516691 |
| COA3           | NM_001040431 | 93.28443061 | 13.19646928 | 6.56E-05    | 7.068893095 |
| IPO9           | NM_018085    | 84.4478793  | 4.80316362  | 2.73E-07    | 17.58172029 |
| SCARB2         | NM_001204255 | 138.7335936 | 1.638012419 | 5.20E-15    | 84.69630143 |
| RPS6KA4        | NM_003942    | 132.4890624 | 1.122987054 | 8.75E-17    | 117.9791539 |
| ARL6IP1        | NM_015161    | 169.8970423 | 3.092034008 | 3.92E-19    | 54.94669264 |
| TRMT61B        | NM_017910    | 100.5302455 | 1.505608977 | 1.04E-11    | 66.77048755 |
| IQCH           | NM_001031715 | 112.4890624 | 0.130058735 | 1.75E-14    | 864.9097067 |
| MRPS27         | NM_015084    | 90.69241049 | 1.459526106 | 5.19E-09    | 62.13825852 |
| TMEM256-PLSCR3 | NR_037719    | 144.1827566 | 18.62379527 | 9.06E-09    | 7.741856825 |
| PPP1CB         | NM_206876    | 63.38738834 | 0.929084414 | 1.48E-07    | 68.22565034 |
| RIC8A          | NM_021932    | 101.3256137 | 20.57807608 | 2.55E-05    | 4.923959525 |
| CTU1           | NM_145232    | 84.18275656 | 3.486996831 | 3.41E-08    | 24.14190796 |
| CBLN3          | NM_001039771 | 40.79536822 | 4.716089116 | 0.004129037 | 8.65025389  |
| DSTYK          | NM_199462    | 176.1415735 | 0.814408668 | 1.01E-20    | 216.2815555 |
| SLC25A21-AS1   | NR_033240    | 126.5096539 | 20.2742629  | 1.40E-06    | 6.239913854 |
| TMEM249        | NM_001252404 | 160.7953682 | 29.67330663 | 4.23E-07    | 5.41885575  |
| LOC727751      | NR_102748    | 34.28571429 | 1.603368827 | 0.003347353 | 21.38354801 |
| ARID1A         | NM_139135    | 57.67310262 | 2.77830248  | 2.65E-05    | 20.75839583 |
| FLJ31104       | NR_102755    | 143.6525111 | 5.126986476 | 7.30E-14    | 28.01889799 |
| GALNT5         | NM_014568    | 41.3256137  | 0.887373739 | 8.97E-05    | 46.57069718 |
| ARHGEF18       | NM_015318    | 73.54955335 | 0.578787239 | 4.94E-09    | 127.075285  |
| ALAS1          | NM_000688    | 218.4684708 | 6.632223891 | 1.07E-20    | 32.94045473 |
| HOXB6          | NM_018952    | 115.0810825 | 19.36569215 | 1.77E-06    | 5.942523594 |
| RAB28          | NM_001017979 | 105.9794085 | 0.315706059 | 1.95E-13    | 335.6901316 |
| SKAP1          | NM_003726    | 38.99871632 | 0.09785247  | 5.97E-05    | 398.546058  |
| ZNF649         | NM_023074    | 49.63191953 | 1.500941914 | 3.64E-05    | 33.06718206 |
| RPS19BP1       | NM_194326    | 102.1209819 | 6.256606152 | 3.74E-09    | 16.3221049  |
| LOC730102      | NR_037167    | 58.73359358 | 1.698005953 | 4.75E-06    | 34.58974539 |
| SMARCE1        | NM_003079    | 64.71300204 | 1.036898764 | 1.73E-07    | 62.41014483 |
| ZNF174         | NM_001032292 | 82.12098192 | 7.03352019  | 1.73E-06    | 11.6756588  |
| ZSCAN2         | NM_017894    | 114.2857143 | 2.750120569 | 4.79E-13    | 41.55661957 |
| SAP30          | NM_003864    | 123.9176338 | 3.555050727 | 1.81E-13    | 34.85678358 |
| CLNS1A         | NM_001293    | 135.8764507 | 0.971903418 | 8.46E-18    | 139.8044787 |
| ARF4           | NM_001660    | 108.6306359 | 4.473109921 | 4.51E-10    | 24.28525964 |
| CFAP221        | NM_001271049 | 31.69369417 | 0.228525063 | 0.000651647 | 138.6880447 |
| CSTF3-AS1      | NR_034027    | 24.71300204 | 0.496456339 | 0.002379481 | 49.77880252 |
| DCAF7          | NR_073585    | 139.7940845 | 2.568851223 | 1.09E-14    | 54.41891041 |
| MAPRE3         | NM_012326    | 46.77477667 | 2.976984581 | 0.000330052 | 15.71213266 |
| SDHD           | NM_001276506 | 79.26383906 | 3.468215971 | 4.58E-08    | 22.85435501 |
| MRPS28         | NM_014018    | 112.7541851 | 0.604786423 | 2.79E-13    | 186.4363698 |
| CKS2           | NM_001827    | 139.2638391 | 3.915848534 | 3.10E-15    | 35.56415368 |
| FAM46A         | NM_017633    | 147.3050222 | 4.766645175 | 3.00E-15    | 30.90329083 |
| VHL            | NM_000551    | 109.8970423 | 6.685554244 | 1.35E-09    | 16.43798528 |
| RFC5           | NM_001206801 | 49.63191953 | 4.377968799 | 0.000570953 | 11.33674583 |
| TMEM64         | NM_001146273 | 146.5096539 | 1.617464506 | 1.63E-17    | 90.57982628 |
| PSMB2          | NM_002794    | 113.2844306 | 2.244232213 | 6.34E-12    | 50.47803428 |
| PTPDC1         | NM_177995    | 170.4272878 | 0.441587379 | 7.70E-23    | 385.9423884 |
| MACROD1        | NM_014067    | 107.5701449 | 1.321828    | 1.26E-10    | 81.37983529 |
| PLAU           | NM_001145031 | 79.26383906 | 7.733769331 | 3.52E-06    | 10.24905653 |
| WWP1           | NM_007013    | 77.93822536 | 1.674904038 | 2.30E-07    | 46.5329497  |
| C14orf28       | NM_001017923 | 130.162165  | 0.867304346 | 3.98E-18    | 150.0766894 |
| LYRM9          | NM_001076680 | 112.4890624 | 1.630029416 | 1.04E-13    | 69.01044929 |
| SKA3           | NM_145061    | 114.8159598 | 0.055943548 | 1.91E-19    | 2052.353901 |
| ANKRD16        | NM_019046    | 178.4684708 | 2.08075951  | 1.24E-20    | 85.77083032 |
| SLC35C1        | NM_001145266 | 100.5302455 | 22.73326318 | 8.22E-05    | 4.422165208 |
| NELFB          | NM_015456    | 138.4684708 | 2.897939428 | 1.56E-14    | 47.78169948 |
| MSTO2P         | NR_024117    | 203.9768411 | 39.81241999 | 1.28E-09    | 5.123447435 |
| STX2           | NM_001980    | 65.71428571 | 0.696870808 | 3.59E-08    | 94.29909385 |
| TRIM2          | NM_015271    | 93.01930787 | 1.861008611 | 4.45E-09    | 49.98327645 |
| COQ10A         | NM_144576    | 201.5907364 | 12.00956957 | 9.96E-17    | 16.78584193 |
| GLRX           | NM_002064    | 58.73359358 | 5.192574329 | 0.000111406 | 11.31107421 |

|              |              |             |             |             |             |
|--------------|--------------|-------------|-------------|-------------|-------------|
| PYROXD2      | NM_032709    | 150.4272878 | 1.346872469 | 4.78E-18    | 111.6863632 |
| WBSCR22      | NM_001202560 | 120.7953682 | 2.108234541 | 2.23E-13    | 57.29693061 |
| LSM10        | NM_032881    | 127.3050222 | 3.192983821 | 1.36E-14    | 39.87023715 |
| ZNF805       | NM_001145078 | 78.73359358 | 0.142759472 | 1.54E-13    | 551.5122236 |
| GOLGA5       | NM_005113    | 104.4478793 | 0.578537618 | 4.61E-14    | 180.5377491 |
| RABEPK       | NM_001174152 | 191.9588169 | 1.595540676 | 7.75E-23    | 120.3095727 |
| NRD1         | NM_001101662 | 53.28443061 | 1.797361634 | 4.46E-05    | 29.64591521 |
| MFAP3        | NM_001135037 | 139.5289618 | 2.432508402 | 2.96E-15    | 57.36011506 |
| MRM1         | NM_024864    | 110.9575332 | 6.429956541 | 8.24E-10    | 17.25634264 |
| PIK3C3       | NM_002647    | 55.87645073 | 1.094863218 | 2.01E-06    | 51.03509719 |
| KGFLP1       | NR_047527    | 27.03989941 | 0.329952327 | 0.002764992 | 81.95092809 |
| CDH24        | NM_022478    | 115.611328  | 4.055162929 | 3.91E-11    | 28.50966287 |
| BUB3         | NM_004725    | 47.30502215 | 4.84244908  | 0.00047949  | 9.768821804 |
| BET1L        | NM_016526    | 160.7953682 | 17.00380934 | 9.28E-11    | 9.456432084 |
| CDKN1B       | NM_004064    | 47.83526763 | 6.502327236 | 0.001187386 | 7.356638    |
| CDK5RAP3     | NM_001278216 | 53.28443061 | 5.353561812 | 0.000128167 | 9.953080301 |
| CEBPZOS      | NR_037880    | 111.222656  | 8.754750677 | 1.40E-08    | 12.7042631  |
| CHCHD5       | NM_032309    | 91.95881691 | 11.2365365  | 3.18E-06    | 8.183911202 |
| ATP5O        | NM_001697    | 123.9176338 | 3.46237677  | 4.13E-13    | 35.78976005 |
| ZFP41        | NM_001271156 | 111.6936942 | 9.844190546 | 1.11E-08    | 11.34615321 |
| MERTK        | NM_006343    | 123.1222656 | 0.724623124 | 3.24E-14    | 169.9121399 |
| GALNT12      | NM_024642    | 43.91763382 | 1.380575497 | 0.000413984 | 31.81110625 |
| METAP2       | NM_006838    | 160.7953682 | 1.257606499 | 1.15E-18    | 127.8582517 |
| PANK3        | NM_024594    | 116.1415735 | 0.815741705 | 4.92E-15    | 142.3754269 |
| CSAD         | NM_001244705 | 83.1222656  | 4.14565368  | 2.04E-07    | 20.05046056 |
| EIF4A3       | NM_014740    | 288.3655131 | 7.897574312 | 4.69E-28    | 36.51317502 |
| INPP4A       | NM_001134224 | 152.2239396 | 0.945072581 | 4.37E-17    | 161.0711629 |
| TMEM106B     | NM_018374    | 126.7747767 | 2.004087371 | 3.61E-14    | 63.25810865 |
| TMEM86A      | NM_153347    | 61.85585918 | 4.77457055  | 2.60E-05    | 12.9552718  |
| CSPG4        | NM_001897    | 147.3050222 | 3.086222984 | 1.66E-14    | 47.72987011 |
| SLC10A3      | NM_001142391 | 165.9794085 | 8.420679211 | 2.63E-14    | 19.71092881 |
| CCDC125      | NM_001297696 | 158.4684708 | 1.146245709 | 5.58E-18    | 138.2500014 |
| ZNF620       | NM_001256168 | 45.97940845 | 1.377594677 | 5.00E-05    | 33.37658691 |
| SP5          | NM_001003845 | 61.59073644 | 1.149506967 | 1.91E-07    | 53.58013322 |
| LOC101928388 | NR_120334    | 112.2239396 | 3.238517632 | 1.06E-10    | 34.65287282 |
| PGAP3        | NM_001291733 | 74.81595977 | 2.199709241 | 4.77E-08    | 47.81174954 |
| COG7         | NM_153603    | 100.7953682 | 1.156100786 | 1.67E-10    | 87.18562382 |
| EXOC7        | NM_001282313 | 75.61132799 | 4.563872042 | 1.81E-06    | 16.5673637  |
| SLC16A1      | NM_003051    | 172.4890624 | 2.892891071 | 3.92E-18    | 59.62514942 |
| CD99         | NM_002414    | 37.67310262 | 1.069724099 | 0.000209605 | 35.21758804 |
| ZNF484       | NM_001261459 | 95.61132799 | 1.501071453 | 2.88E-10    | 63.69538757 |
| FGFR1OP2     | NM_001171887 | 146.5096539 | 0.585638607 | 7.77E-20    | 250.1707576 |
| NISCH        | NM_007184    | 102.8571429 | 4.365735324 | 3.21E-09    | 23.56009589 |
| HMGN3-AS1    | NR_040671    | 121.060491  | 18.67791535 | 4.99E-07    | 6.481477655 |
| ZFYVE1       | NM_021260    | 51.95881691 | 1.4015427   | 6.15E-05    | 37.0725893  |
| TMEM198B     | NR_036477    | 86.77477667 | 18.78715485 | 0.000309582 | 4.618835442 |
| ZNF687       | NM_020832    | 115.0810825 | 10.48584865 | 1.48E-08    | 10.97489448 |
| NAPG         | NM_003826    | 35.61132799 | 0.913437096 | 0.000266886 | 38.98607592 |
| C18orf8      | NR_075076    | 132.2239396 | 3.229293551 | 6.58E-13    | 40.94515954 |
| ARSD         | NM_001669    | 102.8571429 | 2.118167703 | 3.04E-11    | 48.55948976 |
| EEF1DP3      | NR_027062    | 46.24453119 | 0.01503258  | 9.75E-08    | 3076.287076 |
| SRP68        | NR_048541    | 170.6924105 | 3.61586064  | 4.37E-17    | 47.20657888 |
| SELK         | NM_021237    | 77.67310262 | 3.319520661 | 4.12E-08    | 23.39889115 |
| ZFYVE16      | NM_014733    | 178.9987163 | 0.571329921 | 4.51E-22    | 313.3018413 |
| USE1         | NM_018467    | 101.5907364 | 2.371031993 | 2.81E-11    | 42.8466325  |
| 10-Mar       | NM_001288780 | 31.95881691 | 1.080095595 | 0.001203586 | 29.58887812 |
| HELB         | NM_033647    | 121.8558592 | 0.695711336 | 5.13E-15    | 175.1529017 |
| ATF4         | NM_182810    | 178.7335936 | 38.59485399 | 9.22E-08    | 4.631021369 |
| CARKD        | NM_001242883 | 58.2033481  | 1.318399142 | 5.06E-06    | 44.14698574 |
| CCNT1        | NM_001277842 | 44.18275656 | 3.653977938 | 0.000547403 | 12.09168673 |
| CTSZ         | NM_001336    | 84.18275656 | 8.766540123 | 5.61E-06    | 9.602734417 |
| TMEM9B-AS1   | NR_073431    | 138.4684708 | 6.081003116 | 3.19E-12    | 22.7706627  |
| METTTL20     | NM_001135863 | 41.06049096 | 0.610264058 | 6.76E-05    | 67.28315462 |
| NEDD8        | NM_006156    | 124.1827566 | 4.04076642  | 1.80E-12    | 30.73247588 |

|              |              |             |             |             |             |
|--------------|--------------|-------------|-------------|-------------|-------------|
| RGS9         | NM_001081955 | 38.99871632 | 1.032070412 | 0.000129998 | 37.78687564 |
| LOC143666    | NR_026967    | 96.40669621 | 12.9664857  | 4.23E-06    | 7.435067481 |
| BUD31        | NM_003910    | 130.4272878 | 6.055244716 | 1.06E-11    | 21.53955684 |
| PCGF1        | NM_032673    | 67.83526763 | 15.41801513 | 0.002580566 | 4.399740633 |
| CDC42        | NM_001039802 | 74.55083703 | 2.418471464 | 2.34E-07    | 30.82560127 |
| LAMP2        | NM_013995    | 68.83655131 | 0.245157779 | 2.78E-10    | 280.7846915 |
| ABHD4        | NM_022060    | 82.91635014 | 1.511674521 | 7.19E-10    | 54.85066327 |
| PIGV         | NM_017837    | 116.1415735 | 9.070048492 | 1.34E-09    | 12.80495618 |
| ARMC10       | NM_001161010 | 103.9176338 | 3.080040371 | 7.97E-10    | 33.73904927 |
| NPEPPS       | NM_006310    | 128.8365513 | 2.20264101  | 8.38E-13    | 58.49185171 |
| UVRAG        | NM_003369    | 87.83526763 | 0.424510439 | 6.51E-10    | 206.909559  |
| HAUS5        | NM_015302    | 53.54955335 | 1.051577927 | 2.30E-06    | 50.92304808 |
| SOCS5        | NM_014011    | 43.1222656  | 0.452848639 | 2.59E-05    | 95.22445665 |
| SPIN1        | NM_006717    | 108.5714286 | 0.78774093  | 7.55E-13    | 137.8263137 |
| PUM1         | NM_014676    | 151.6936942 | 1.998740979 | 5.31E-15    | 75.89462354 |
| ANKRD29      | NM_173505    | 40.26512274 | 1.963897027 | 0.00112734  | 20.50266495 |
| HSPB11       | NM_016126    | 113.0193079 | 2.305502242 | 1.27E-12    | 49.02155626 |
| ACADM        | NM_001286043 | 120.5302455 | 2.813865515 | 2.07E-12    | 42.83440158 |
| ZC3H12C      | NM_033390    | 38.2033481  | 1.171602594 | 0.000269236 | 32.60777015 |
| NPHP3-ACAD11 | NR_037804    | 92.22393965 | 1.429361245 | 8.31E-09    | 64.52108589 |
| TGDS         | NM_014305    | 187.0398994 | 1.50672666  | 2.27E-22    | 124.1365832 |
| SPOPL        | NM_001001664 | 61.06049096 | 1.707427777 | 9.83E-06    | 35.76168302 |
| C8orf37      | NM_177965    | 172.7541851 | 3.211231386 | 5.26E-18    | 53.79686618 |
| C2orf70      | NM_001105519 | 38.46847084 | 0.337067346 | 1.82E-05    | 114.1269579 |
| MRPL44       | NM_022915    | 98.46847084 | 2.112393391 | 7.18E-11    | 46.61464634 |
| LOC100507283 | NR_103862    | 241.060491  | 1.199335153 | 7.11E-31    | 200.9951017 |
| UBXN1        | NM_001286077 | 81.85585918 | 18.92047509 | 0.001012651 | 4.326310983 |
| CCNH         | NM_001199189 | 137.4079799 | 1.300123947 | 1.87E-17    | 105.6883693 |
| EGFR         | NM_201284    | 120.2651227 | 2.927031772 | 1.68E-11    | 41.08774079 |
| SECISBP2     | NM_024077    | 184.4478793 | 1.164409164 | 2.25E-22    | 158.4046957 |
| POLE         | NM_006231    | 44.4478793  | 1.768046104 | 0.000288367 | 25.13954766 |
| LINC01521    | NR_120386    | 67.03989941 | 15.71825967 | 0.003317718 | 4.265096824 |
| CALM2        | NM_001743    | 151.9588169 | 3.97087559  | 6.42E-16    | 38.26833994 |
| TBC1D7       | NM_001258457 | 215.3462052 | 0.836108351 | 6.28E-30    | 257.5577735 |
| RPIA         | NM_144563    | 92.22393965 | 0.995260749 | 1.04E-09    | 92.66309331 |
| HSPE1-MOB4   | NM_001202485 | 47.30502215 | 5.133696171 | 0.000949244 | 9.214612742 |
| COA4         | NM_016565    | 146.5096539 | 4.43549283  | 8.05E-15    | 33.03120071 |
| C5orf51      | NM_175921    | 89.89704227 | 0.713373984 | 1.38E-11    | 126.0167097 |
| REEP3        | NM_001001330 | 85.97940845 | 0.492641041 | 2.29E-10    | 174.5274982 |
| NECAP2       | NM_001145278 | 106.5096539 | 2.718068    | 1.31E-10    | 39.18579444 |
| ARFGEF1      | NM_006421    | 92.75418513 | 0.977090966 | 3.18E-10    | 94.9289149  |
| SRRT         | NM_015908    | 83.38738834 | 6.819423149 | 1.09E-06    | 12.22792405 |
| ZFC3H1       | NM_144982    | 97.67310262 | 2.558996433 | 1.14E-09    | 38.16851847 |
| REEP4        | NM_025232    | 127.0398994 | 13.75151269 | 9.63E-09    | 9.23824908  |
| KIAA0319L    | NM_024874    | 157.9382254 | 1.083762803 | 2.04E-16    | 145.7313583 |
| KIAA1033     | NM_001293640 | 127.8352676 | 0.636645814 | 1.77E-16    | 200.7949551 |
| SH2D3A       | NM_005490    | 129.6319195 | 8.231781962 | 1.63E-10    | 15.74773483 |
| LOC642366    | NR_046243    | 95.08108251 | 2.030900832 | 1.81E-10    | 46.81719611 |
| SRPK1        | NM_003137    | 143.9176338 | 0.945883255 | 1.72E-15    | 152.1515822 |
| RIOK1        | NM_031480    | 84.4478793  | 1.21912977  | 1.29E-09    | 69.26898301 |
| TACC1        | NM_006283    | 143.9176338 | 1.62333936  | 4.23E-15    | 88.65529746 |
| SCRN1        | NM_001145514 | 43.65251108 | 1.017669514 | 5.44E-05    | 42.89458461 |
| ZNF778       | NM_182531    | 128.1003904 | 1.56164784  | 9.73E-16    | 82.02898703 |
| KCTD13       | NM_178863    | 73.54955335 | 6.413151016 | 1.11E-05    | 11.4685516  |
| HDAC5        | NM_005474    | 63.1222656  | 5.097121659 | 4.27E-05    | 12.38390406 |
| XK           | NM_021083    | 70.16216501 | 0.862022626 | 9.00E-09    | 81.39248659 |
| IFNAR1       | NM_000629    | 124.1827566 | 2.622827175 | 5.76E-13    | 47.34690785 |
| GTF2IRD2     | NM_001281447 | 78.46847084 | 2.966073882 | 5.38E-08    | 26.45533253 |
| NTN4         | NM_021229    | 35.87645073 | 0.303183718 | 0.000175863 | 118.3323794 |
| MED26        | NM_004831    | 66.77477667 | 2.325291057 | 2.49E-06    | 28.71673912 |
| NKAPP1       | NR_027131    | 83.38738834 | 2.615820053 | 7.99E-09    | 31.87810577 |
| TTC5         | NM_138376    | 30.69241049 | 0.826607665 | 0.002908802 | 37.13056605 |
| BBS5         | NM_152384    | 32.48906239 | 0.037702589 | 1.75E-05    | 861.7196768 |
| NR1D2        | NM_001145425 | 100.7953682 | 1.290378874 | 3.92E-11    | 78.11300251 |

|              |              |             |             |             |             |
|--------------|--------------|-------------|-------------|-------------|-------------|
| SYN2         | NM_133625    | 215.0810825 | 0.533721493 | 2.13E-25    | 402.9837381 |
| TBCB         | NM_001281    | 123.3873883 | 6.575793055 | 1.47E-10    | 18.76387947 |
| AKIRIN1      | NM_001136275 | 154.8159598 | 4.278303995 | 2.39E-15    | 36.1862925  |
| EML1         | NM_001008707 | 29.36679679 | 0.689617715 | 0.002413563 | 42.58416824 |
| NINL         | NM_025176    | 132.7541851 | 0.893302203 | 5.89E-15    | 148.6106098 |
| FAM84B       | NM_174911    | 142.3861047 | 6.585638642 | 2.82E-13    | 21.62069807 |
| COMMD10      | NM_016144    | 99.5289618  | 0.357613277 | 9.46E-12    | 278.3145037 |
| SYNM         | NM_145728    | 135.611328  | 1.192993751 | 4.64E-16    | 113.6731252 |
| L3MBTL3      | NM_001007102 | 66.50965393 | 0.91977078  | 1.94E-07    | 72.31111861 |
| MB21D2       | NM_178496    | 115.3462052 | 0.377912034 | 3.22E-14    | 305.21972   |
| LONP2        | NM_001300948 | 43.65251108 | 1.515159198 | 0.00063496  | 28.81051123 |
| METTL5       | NM_001293187 | 150.4272878 | 4.246635877 | 2.99E-15    | 35.42269507 |
| SLC39A11     | NM_001159770 | 130.162165  | 1.56143993  | 1.69E-12    | 83.360341   |
| CHMP2A       | NM_198426    | 135.0810825 | 22.51821739 | 3.64E-07    | 5.998746711 |
| MORN2        | NM_001145450 | 30.42728775 | 1.599181202 | 0.002135383 | 19.02679178 |
| VPS39        | NM_001301138 | 75.87645073 | 1.845017782 | 1.05E-07    | 41.12505118 |
| TFG          | NM_001195478 | 93.01930787 | 0.736817506 | 5.54E-11    | 126.2447039 |
| COPS6        | NM_006833    | 115.3462052 | 18.67890584 | 2.02E-06    | 6.175212093 |
| TANK         | NM_133484    | 44.18275656 | 1.846114002 | 0.000585888 | 23.93284299 |
| TRRAP        | NM_001244580 | 24.97812478 | 0.863634765 | 0.004993507 | 28.92209275 |
| IQSEC2       | NM_001111125 | 215.3462052 | 1.758732022 | 1.84E-11    | 65.58486671 |
| GTF2E2       | NM_002095    | 163.9176338 | 0.305589048 | 9.28E-23    | 536.3989156 |
| ATG16L2      | NM_033388    | 190.162165  | 11.9342687  | 4.07E-15    | 15.934128   |
| AHSA1        | NM_012111    | 173.2844306 | 3.703948405 | 5.42E-19    | 46.78370529 |
| GPHN         | NM_020806    | 98.2033481  | 0.177187851 | 5.46E-11    | 554.2329648 |
| ZBTB44       | NM_014155    | 57.40797988 | 0.846262945 | 1.26E-06    | 67.83704783 |
| TRMT12       | NM_017956    | 113.0193079 | 6.955446571 | 1.20E-09    | 16.24903688 |
| CTC-436P18.1 | NR_109908    | 118.4684708 | 1.983918727 | 7.15E-12    | 59.71437702 |
| RRP7A        | NM_015703    | 84.4478793  | 15.7838056  | 5.74E-05    | 5.350286326 |
| SQSTM1       | NM_003900    | 191.4877787 | 8.82707537  | 4.95E-17    | 21.69323028 |
| BRD9         | NM_023924    | 117.6731026 | 3.571812218 | 3.91E-11    | 32.94492975 |
| VCP          | NM_007126    | 93.01930787 | 7.105312115 | 9.96E-08    | 13.09151609 |
| RUVBL2       | NM_006666    | 63.65251108 | 3.827068576 | 2.31E-05    | 16.63218461 |
| FAM89A       | NM_198552    | 120.2651227 | 0.670516958 | 3.64E-16    | 179.3617913 |
| LOC100131564 | NR_034089    | 136.4066962 | 1.009131947 | 1.84E-16    | 135.1723098 |
| GATAD1       | NM_021167    | 140         | 4.930055843 | 1.26E-13    | 28.39724426 |
| FOXO3        | NM_001455    | 89.36679679 | 1.133026817 | 6.51E-10    | 78.87438802 |
| SMEK1        | NM_001284280 | 155.0810825 | 2.352491694 | 3.36E-16    | 65.92205315 |
| METTL1       | NM_005371    | 121.5907364 | 4.679275548 | 7.11E-12    | 25.98494899 |
| RARS2        | NM_020320    | 93.28443061 | 1.083440775 | 9.74E-10    | 86.10016603 |
| EIF4A2       | NM_001967    | 187.0398994 | 25.96326596 | 4.88E-11    | 7.204020468 |
| GAPDH        | NM_001289745 | 232.4890624 | 44.00422538 | 5.79E-11    | 5.283334962 |
| RAB2B        | NM_032846    | 40.26512274 | 2.492598088 | 0.000713179 | 16.15387693 |
| TRMT13       | NM_019083    | 92.22393965 | 0.113776771 | 1.08E-14    | 810.569141  |
| OTUD1        | NM_001145373 | 61.3256137  | 5.862264347 | 9.01E-05    | 10.46107955 |
| UBA5         | NM_024818    | 203.6525111 | 0.368771655 | 5.70E-31    | 552.2455651 |
| PEX3         | NM_003630    | 100.7953682 | 0.553444788 | 3.11E-12    | 182.1236201 |
| ENPP1        | NM_006208    | 29.36679679 | 0.269102652 | 0.001361831 | 109.128604  |
| RAD51AP2     | NM_001099218 | 80.53024548 | 0.41827665  | 3.18E-12    | 192.5286661 |
| FAM120C      | NM_017848    | 57.67310262 | 0.087523239 | 3.53E-08    | 658.9461625 |
| TSEN2        | NM_001145395 | 96.14157347 | 1.785424645 | 4.54E-10    | 53.84801521 |
| CMTR1        | NM_015050    | 97.93822536 | 1.196225056 | 2.01E-10    | 81.87274199 |
| LYAR         | NM_001145725 | 97.93822536 | 3.712929629 | 4.26E-09    | 26.37761422 |
| LOC101928222 | NR_110235    | 120.5302455 | 3.638817097 | 2.26E-12    | 33.12346905 |
| SLC29A2      | NM_001532    | 125.9794085 | 20.03556156 | 1.82E-07    | 6.287790242 |
| FAM72B       | NM_001100910 | 64.4478793  | 1.738207243 | 3.28E-07    | 37.07721248 |
| SEMA6A       | NM_001300780 | 89.10167405 | 0.279872066 | 4.02E-11    | 318.3657282 |
| SMEK2        | NM_001122964 | 69.89704227 | 0.451222695 | 1.32E-08    | 154.9058658 |
| PLAGL2       | NM_002657    | 88.83655131 | 2.39062537  | 6.10E-09    | 37.16038173 |
| CCDC22       | NM_014008    | 108.8365513 | 1.10152936  | 4.12E-14    | 98.80494819 |
| CMBL         | NM_138809    | 54.55083703 | 0.619829047 | 4.00E-07    | 88.0094879  |
| CPT2         | NM_000098    | 47.03989941 | 6.908181091 | 0.004807164 | 6.809303171 |
| CTBP1-AS2    | NR_033339    | 53.28443061 | 6.033583826 | 0.000587772 | 8.831306922 |
| NPLOC4       | NM_017921    | 186.5096539 | 4.045473835 | 2.69E-17    | 46.10329013 |

|              |              |             |             |             |             |
|--------------|--------------|-------------|-------------|-------------|-------------|
| NDOR1        | NM_001144026 | 84.18275656 | 11.30693417 | 2.91E-05    | 7.445232747 |
| ARPC1A       | NM_006409    | 132.2239396 | 1.579842646 | 1.49E-14    | 83.69437296 |
| ENTPD7       | NM_020354    | 161.8558592 | 1.088618235 | 7.48E-19    | 148.6800918 |
| PPP2R5D      | NM_001270476 | 126.5096539 | 4.748684469 | 7.75E-12    | 26.64098968 |
| ZNF212       | NM_012256    | 76.40669621 | 0.306266801 | 4.35E-11    | 249.4775663 |
| UQCRC1       | NM_003365    | 138.2033481 | 3.654012999 | 3.22E-14    | 37.82234714 |
| VWDE         | NM_001135924 | 107.5701449 | 1.359807361 | 3.26E-11    | 79.10689997 |
| EFNA3        | NM_004952    | 169.3667968 | 21.69937273 | 2.60E-10    | 7.805147132 |
| KIF20B       | NM_001284259 | 64.97812478 | 0.267781746 | 1.07E-08    | 242.6533018 |
| SOAT1        | NM_003101    | 109.8970423 | 0.579607001 | 7.98E-14    | 189.6061334 |
| CYB5D1       | NM_144607    | 64.18275656 | 6.420303518 | 0.000103634 | 9.996841485 |
| SCRN3        | NM_001193528 | 55.34620525 | 0.988397861 | 1.18E-05    | 55.9958772  |
| CRAT         | NM_001257363 | 73.28443061 | 5.751431033 | 8.12E-06    | 12.74194721 |
| LRBA         | NM_006726    | 200.2651227 | 0.498246914 | 3.44E-21    | 401.9395144 |
| MINPP1       | NM_004897    | 90.69241049 | 3.154163018 | 5.49E-09    | 28.75324134 |
| ECSIT        | NM_001142464 | 50.16216501 | 2.69285438  | 5.04E-05    | 18.6278788  |
| LRRC42       | NM_052940    | 83.38738834 | 1.938306448 | 5.29E-09    | 43.02074547 |
| HMGN1        | NM_004965    | 77.40797988 | 4.690474897 | 6.88E-07    | 16.50322869 |
| PFAS         | NM_012393    | 90.42728775 | 2.284498639 | 6.19E-10    | 39.58299042 |
| TNFRSF18     | NM_004195    | 101.060491  | 15.59729527 | 1.12E-05    | 6.479359994 |
| TRIM6        | NM_001198644 | 27.03989941 | 0.174469548 | 0.000538626 | 154.9834895 |
| BAG3         | NM_004281    | 170.162165  | 3.661870531 | 1.58E-17    | 46.46864589 |
| EXOC3        | NM_007277    | 46.77477667 | 0.662254247 | 4.73E-06    | 70.62963636 |
| CTTNBP2      | NM_033427    | 83.91763382 | 0.936360992 | 3.13E-09    | 89.6210271  |
| ENO4         | NM_001242699 | 130.162165  | 3.701419811 | 1.50E-12    | 35.16546938 |
| CBY1         | NM_015373    | 98.2033481  | 2.270995199 | 5.74E-11    | 43.24242876 |
| GMPPA        | NM_013335    | 147.5701449 | 2.615962759 | 2.03E-17    | 56.41140892 |
| ZNF274       | NM_016324    | 68.83655131 | 0.605622186 | 3.13E-09    | 113.6625323 |
| GLTP         | NM_016433    | 97.40797988 | 0.219736289 | 1.62E-15    | 443.294916  |
| VPS13A       | NM_001018038 | 126.2445312 | 0.993331648 | 8.90E-14    | 127.0920256 |
| LOC101928131 | NR_121677    | 23.91763382 | 0.098941206 | 0.000654913 | 241.7358234 |
| C4orf3       | NM_001001701 | 143.3873883 | 10.61408452 | 1.39E-11    | 13.5091621  |
| MMS22L       | NM_198468    | 69.63191953 | 1.017116887 | 1.13E-07    | 68.46009582 |
| CHD1L        | NM_001256338 | 107.3050222 | 0.822021045 | 2.85E-12    | 130.5380474 |
| C5orf45      | NM_001017987 | 171.222656  | 6.58673354  | 7.74E-16    | 25.99507858 |
| SMCHD1       | NM_015295    | 131.9588169 | 0.616653371 | 2.72E-15    | 213.9918846 |
| BCAT2        | NM_001190    | 144.1827566 | 5.48206512  | 2.22E-13    | 26.30081062 |
| PSMD11       | NM_002815    | 101.3256137 | 1.00628376  | 2.65E-11    | 100.6928838 |
| TBC1D22B     | NM_017772    | 114.8159598 | 0.59267597  | 2.70E-14    | 193.7246752 |
| DGCR6L       | NM_033257    | 180.5302455 | 2.624218185 | 4.34E-21    | 68.79391604 |
| MEF2D        | NM_005920    | 54.28571429 | 3.637957612 | 4.11E-05    | 14.92203046 |
| SLC35E2      | NM_182838    | 102.3861047 | 5.585941655 | 1.01E-08    | 18.32924706 |
| BACH2        | NM_001170794 | 43.38738834 | 0.501938459 | 7.96E-05    | 86.43965721 |
| RAB11FIP2    | NM_014904    | 80.53024548 | 1.602280651 | 3.03E-08    | 50.25976282 |
| GAK          | NM_005255    | 170.6924105 | 0.053408496 | 2.17E-29    | 3195.978596 |
| BANF1        | NM_003860    | 166.7747767 | 31.46474411 | 1.46E-07    | 5.300369711 |
| GATA6        | NM_005257    | 101.060491  | 2.095098547 | 1.40E-10    | 48.23662882 |
| SP100        | NM_001080391 | 77.93822536 | 0.039603371 | 2.28E-12    | 1967.969465 |
| USP4         | NM_001251877 | 121.5907364 | 0.935083045 | 3.50E-15    | 130.0320191 |
| RWDD1        | NM_015952    | 82.12098192 | 0.59794609  | 1.38E-10    | 137.3384377 |
| TRA2A        | NM_001282758 | 153.2844306 | 4.063529398 | 2.88E-15    | 37.72199377 |
| LDLR         | NM_001195799 | 83.91763382 | 6.747712651 | 2.97E-06    | 12.43645635 |
| LAP3         | NM_015907    | 87.03989941 | 2.405371452 | 7.80E-09    | 36.1856375  |
| RAP1GDS1     | NM_001100429 | 68.57142857 | 0.301511459 | 3.72E-08    | 227.4256138 |
| TBC1D8       | NM_001102426 | 183.1222656 | 3.563594271 | 9.18E-18    | 51.386957   |
| SLC25A20     | NM_000387    | 22.12098192 | 0.132904958 | 0.002923898 | 166.4421123 |
| DNAL1        | NM_001201366 | 53.54955335 | 0.071931593 | 1.12E-08    | 744.4510933 |
| ZFAS1        | NR_036659    | 164.713002  | 28.53653632 | 1.13E-08    | 5.77200401  |
| MAPK1IP1L    | NM_144578    | 149.8970423 | 4.713564745 | 4.86E-14    | 31.80120575 |
| GTF2IRD1P1   | NR_003934    | 114.3449216 | 0.487928199 | 7.59E-15    | 234.3478442 |
| DPF2         | NM_006268    | 106.7747767 | 1.401144654 | 1.12E-12    | 76.20539135 |
| RIMKLA       | NM_173642    | 74.55083703 | 1.904108397 | 1.91E-07    | 39.15262238 |
| SLC38A10     | NM_001037984 | 201.8558592 | 1.551684654 | 3.73E-23    | 130.0881971 |
| LYRM1        | NM_001128301 | 108.3655131 | 4.955690295 | 4.73E-10    | 21.86688567 |

|           |              |             |             |             |             |
|-----------|--------------|-------------|-------------|-------------|-------------|
| TLK2      | NM_006852    | 46.50965393 | 1.68757975  | 0.000356693 | 27.55997394 |
| LARP6     | NM_197958    | 117.9382254 | 9.342678628 | 6.45E-09    | 12.62359865 |
| SNX19     | NM_014758    | 97.14285714 | 2.108435065 | 4.90E-10    | 46.07344032 |
| ZNF511    | NM_145806    | 95.08108251 | 2.274758987 | 5.38E-11    | 41.79831052 |
| TTC17     | NM_018259    | 107.0398994 | 0.6897334   | 3.47E-12    | 155.1902508 |
| SOWAHB    | NM_001029870 | 53.54955335 | 1.176675647 | 4.45E-06    | 45.5091881  |
| PYCR1     | NM_001282281 | 138.4684708 | 20.26324914 | 4.44E-08    | 6.833478178 |
| RBM25     | NM_021239    | 183.3873883 | 1.925168873 | 1.37E-19    | 95.25781916 |
| SLC27A6   | NM_014031    | 67.03989941 | 0.248135923 | 7.02E-09    | 270.1740991 |
| LINC00659 | NR_046224    | 120.7953682 | 14.3611395  | 1.42E-07    | 8.411266265 |
| FASTK     | NM_001258461 | 118.4684708 | 19.60130502 | 2.34E-06    | 6.043907317 |
| SPATA5    | NM_145207    | 78.46847084 | 0.094950103 | 1.43E-09    | 826.4179617 |
| BBS2      | NM_031885    | 155.8764507 | 2.16728215  | 2.16E-17    | 71.92254628 |
| PAFAH1B3  | NM_001145940 | 89.10167405 | 11.94620838 | 1.07E-05    | 7.458573568 |
| CHMP4C    | NM_152284    | 202.3861047 | 2.651802055 | 3.42E-22    | 76.32021564 |
| PPP2R2A   | NM_002717    | 48.57142857 | 1.418501843 | 0.000148321 | 34.2413574  |
| MSMO1     | NM_001017369 | 107.0398994 | 3.076023999 | 9.57E-11    | 34.79813533 |
| CEP164    | NM_014956    | 141.060491  | 1.215997633 | 8.36E-15    | 116.003919  |
| ART5      | NM_001297668 | 85.97940845 | 3.462951739 | 1.78E-08    | 24.82835885 |
| MTFP1     | NM_016498    | 68.83655131 | 13.07285202 | 0.001255321 | 5.26561084  |
| DRAM2     | NM_178454    | 78.99871632 | 2.794693126 | 2.79E-08    | 28.26740281 |
| RAB11A    | NM_004663    | 136.1415735 | 3.093059566 | 5.18E-14    | 44.01517998 |
| N4BP2L2   | NM_033111    | 46.50965393 | 1.677023828 | 0.000335774 | 27.73344849 |
| TRIM68    | NM_018073    | 132.4890624 | 2.997313842 | 3.98E-14    | 44.20259918 |
| TM9SF4    | NM_014742    | 67.57014489 | 2.381841464 | 1.35E-06    | 28.3688675  |
| FNBP1L    | NM_017737    | 124.4478793 | 1.392704533 | 9.35E-13    | 89.35698588 |
| SLC35B4   | NM_032826    | 55.61132799 | 1.93179834  | 2.09E-05    | 28.78733604 |
| STRN4     | NM_013403    | 43.65251108 | 3.906137018 | 0.002498978 | 11.17536607 |
| PPAP2B    | NM_003713    | 89.63191953 | 1.191299401 | 6.38E-09    | 75.23878501 |
| AIP       | NM_003977    | 36.14157347 | 3.571389663 | 0.004760195 | 10.11975082 |
| PFKFB4    | NM_004567    | 61.59073644 | 0.672718316 | 4.95E-08    | 91.55501638 |
| PTPN14    | NM_005401    | 109.3667968 | 0.117852103 | 1.25E-14    | 928.000387  |
| WDR24     | NM_032259    | 150.162165  | 7.079868146 | 1.32E-13    | 21.20974034 |
| SETD7     | NM_030648    | 116.4066962 | 2.532705231 | 6.05E-12    | 45.9614071  |
| ZSCAN9    | NM_006299    | 76.40669621 | 3.022078698 | 5.96E-08    | 25.28282809 |
| ELL3      | NM_025165    | 146.2445312 | 26.94377168 | 3.10E-07    | 5.427767608 |
| PPP2R5B   | NM_006244    | 70.16216501 | 4.295366956 | 1.03E-06    | 16.33438207 |
| LMAN2L    | NR_024519    | 78.2033481  | 1.749393623 | 5.38E-08    | 44.70311718 |
| TFCP2     | NM_005653    | 75.61132799 | 0.676380954 | 6.83E-09    | 111.7880797 |
| IMMP1L    | NM_144981    | 55.87645073 | 0.423724456 | 4.47E-07    | 131.8697797 |
| IRF5      | NM_001242452 | 109.8970423 | 3.822554198 | 3.62E-11    | 28.74963612 |
| THOC2     | NM_001081550 | 52.22393965 | 0.532620857 | 5.53E-06    | 98.05087238 |
| PVRL3     | NM_015480    | 29.10167405 | 0.827785779 | 0.00205032  | 35.15604493 |
| SERINC1   | NM_020755    | 63.65251108 | 0.853839949 | 5.62E-07    | 74.54852764 |
| CHMP4B    | NM_176812    | 137.9382254 | 1.733967283 | 5.51E-15    | 79.55065051 |
| UBE2T     | NM_014176    | 107.3050222 | 3.903785336 | 1.71E-10    | 27.48742897 |
| GLTSCR1   | NM_015711    | 135.0810825 | 2.594698453 | 2.88E-13    | 52.06041664 |
| ARMCX6    | NM_001009584 | 43.38738834 | 4.130961387 | 0.001586723 | 10.50297601 |
| C5orf56   | NR_045116    | 75.87645073 | 1.175744991 | 8.14E-08    | 64.53478546 |
| GNAI3     | NM_006496    | 167.0398994 | 1.063769801 | 1.60E-19    | 157.0263597 |
| ZNF799    | NM_001080821 | 109.3667968 | 0.693350353 | 1.57E-15    | 157.7367002 |
| RHOB      | NM_004040    | 170.4272878 | 21.54182473 | 2.86E-10    | 7.911460143 |
| ZNF8      | NM_021089    | 73.54955335 | 0.151957591 | 3.13E-11    | 484.0136839 |
| SMIM20    | NM_001145432 | 117.9382254 | 0.647324946 | 1.80E-16    | 182.193234  |
| MRC2      | NM_006039    | 84.71300204 | 0.12328558  | 4.15E-13    | 687.1282249 |
| LOC414300 | NR_121211    | 173.0193079 | 3.211426683 | 5.00E-20    | 53.87615067 |
| CACYBP    | NM_014412    | 55.61132799 | 6.231653151 | 0.000653551 | 8.924008868 |
| RBBP4     | NM_001135255 | 84.18275656 | 3.416469646 | 3.43E-08    | 24.64027645 |
| TERF2IP   | NM_018975    | 72.48906239 | 4.071870981 | 8.93E-07    | 17.80239667 |
| SURF2     | NM_017503    | 95.34620525 | 15.75992829 | 2.99E-05    | 6.049913649 |
| NDUFB6    | NM_182739    | 91.95881691 | 2.273056826 | 4.89E-10    | 40.45601318 |
| SETD3     | NM_199123    | 66.24453119 | 1.108293825 | 1.33E-07    | 59.77163248 |
| SNX16     | NM_152836    | 86.77477667 | 1.479520529 | 5.86E-09    | 58.65060672 |
| SLC25A30  | NM_001286807 | 98.73359358 | 1.570411945 | 2.65E-11    | 62.87114277 |

|                |              |             |             |             |             |
|----------------|--------------|-------------|-------------|-------------|-------------|
| GGNBP2         | NM_024835    | 194.8159598 | 3.661973929 | 4.14E-19    | 53.19971238 |
| SNHG21         | NR_110097    | 112.7541851 | 2.16048811  | 9.24E-13    | 52.18921807 |
| COBL           | NM_015198    | 74.55083703 | 0.092691088 | 1.60E-09    | 804.2934685 |
| LIN7B          | NM_022165    | 68.83655131 | 14.43149088 | 0.001700384 | 4.76988496  |
| SCOC           | NM_001153484 | 61.3256137  | 2.42005264  | 7.24E-06    | 25.34061148 |
| BCL2L2         | NM_001199839 | 132.2239396 | 4.886885101 | 5.55E-13    | 27.05689553 |
| ATP6V1A        | NM_001690    | 132.7541851 | 0.330837966 | 2.41E-18    | 401.2664777 |
| ITPR3          | NM_002224    | 123.3873883 | 4.628096099 | 6.98E-11    | 26.66050698 |
| BRD8           | NM_006696    | 49.36679679 | 2.760612299 | 1.00E-04    | 17.88255338 |
| WASH2P         | NR_024077    | 59.79408454 | 3.800354107 | 3.21E-05    | 15.73381923 |
| DCTN3          | NM_001281426 | 52.48906239 | 5.088378927 | 0.00065497  | 10.3154783  |
| HINT1          | NM_005340    | 146.7747767 | 3.583758976 | 6.24E-16    | 40.95553793 |
| FYTTD1         | NM_001011537 | 108.8365513 | 2.661973268 | 2.76E-11    | 40.88566652 |
| RABEP2         | NM_024816    | 63.38738834 | 3.52811287  | 2.02E-05    | 17.96637202 |
| NAPIL4         | NM_005969    | 46.77477667 | 3.241520859 | 0.000322475 | 14.42988607 |
| SPRYD7         | NM_001127482 | 64.97812478 | 2.445819253 | 1.12E-06    | 26.56701827 |
| E2F4           | NM_001950    | 127.3050222 | 8.48338148  | 7.82E-11    | 15.00640074 |
| C7orf55-LUC7L2 | NM_001244584 | 64.4478793  | 4.123684084 | 2.57E-05    | 15.62871403 |
| PHB            | NM_001281496 | 124.4478793 | 3.267590919 | 6.02E-13    | 38.08551387 |
| VAPA           | NM_194434    | 118.2033481 | 1.927322811 | 2.48E-12    | 61.33033213 |
| WAPAL          | NM_015045    | 104.1827566 | 1.476163567 | 2.36E-10    | 70.57670226 |
| LDB1           | NM_001113407 | 92.48906239 | 9.630372645 | 9.82E-07    | 9.603892372 |
| NAPEPLD        | NM_198990    | 95.61132799 | 0.422334334 | 8.78E-13    | 226.3877696 |
| VRK3           | NM_016440    | 65.24324752 | 3.458241896 | 3.07E-06    | 18.86601617 |
| LOC100507501   | NR_039999    | 218.4684708 | 6.681527334 | 3.33E-21    | 32.69738488 |
| RHOA           | NM_001664    | 80.53024548 | 2.171356836 | 6.70E-08    | 37.08752249 |
| POLR2D         | NM_004805    | 190.162165  | 5.542147557 | 5.61E-19    | 34.31199965 |
| NDFIP2         | NM_001161407 | 101.3256137 | 1.249566407 | 2.77E-10    | 81.08861851 |
| HERC1          | NM_003922    | 69.36679679 | 0.587182553 | 1.06E-07    | 118.1349759 |
| VGLL4          | NM_001284390 | 122.6512274 | 1.992219228 | 6.52E-12    | 61.56512581 |
| ZNF335         | NM_022095    | 95.34620525 | 6.397014944 | 1.37E-07    | 14.90479639 |
| PCYT1A         | NM_005017    | 166.2445312 | 0.229292405 | 1.06E-25    | 725.0328737 |
| MYBBP1A        | NM_014520    | 83.91763382 | 4.298952248 | 1.28E-07    | 19.52048522 |
| NSMF           | NM_001130971 | 66.77477667 | 8.339799343 | 0.000224547 | 8.006760586 |
| RP9P           | NR_003500    | 121.060491  | 3.569478068 | 1.45E-11    | 33.91546009 |
| EID2           | NM_153232    | 98.46847084 | 13.5977421  | 2.81E-05    | 7.241530992 |
| PARG           | NM_003631    | 72.75418513 | 0.488721015 | 6.21E-08    | 148.8664961 |
| PFDN5          | NM_002624    | 53.54955335 | 9.82442458  | 0.003342648 | 5.450655446 |
| PTGES          | NM_004878    | 118.9987163 | 3.786171059 | 2.78E-12    | 31.42983095 |
| TMEM214        | NM_001083590 | 157.9382254 | 2.532837936 | 2.10E-18    | 62.35623019 |
| VCPKMT         | NM_024558    | 66.24453119 | 1.569362759 | 3.45E-07    | 42.2111018  |
| LZTR1          | NM_006767    | 88.10039037 | 7.208741341 | 3.97E-07    | 12.22132772 |
| DLG1           | NM_004087    | 127.0398994 | 1.112909122 | 1.47E-13    | 114.1511889 |
| LRIG3          | NM_153377    | 87.57014489 | 1.256751067 | 2.40E-09    | 69.6797856  |
| ITGAX          | NM_001286375 | 34.28571429 | 0.238374945 | 6.42E-05    | 143.831032  |
| ESRRA          | NM_001282450 | 109.6319195 | 12.53013725 | 3.60E-07    | 8.749458794 |
| RBM18          | NR_027125    | 146.7747767 | 2.743446626 | 4.66E-15    | 53.5001393  |
| TMEM52         | NM_178545    | 107.3050222 | 24.83447562 | 0.000214189 | 4.320808855 |
| ZNF333         | NM_032433    | 81.06049096 | 1.11215912  | 7.23E-09    | 72.88569548 |
| PSAP           | NM_002778    | 200.5302455 | 1.776873432 | 1.75E-23    | 112.8556721 |
| ETFB           | NM_001985    | 63.1222656  | 4.86090437  | 2.73E-05    | 12.98570406 |
| DPH6           | NM_001141972 | 144.713002  | 1.489950057 | 1.63E-17    | 97.12607571 |
| TNFRSF12A      | NM_016639    | 243.3873883 | 51.75039709 | 6.57E-10    | 4.703101851 |
| SEPSECS-AS1    | NR_037934    | 95.87645073 | 1.118297039 | 7.90E-11    | 85.73433299 |
| ACER2          | NM_001010887 | 166.2445312 | 0.272634931 | 6.58E-24    | 609.769741  |
| TESK2          | NM_007170    | 104.4478793 | 1.161448929 | 1.06E-11    | 89.92894706 |
| ZNF204P        | NR_024553    | 41.06049096 | 1.546693529 | 0.00048588  | 26.54727016 |
| TBC1D2         | NM_001267571 | 75.61132799 | 1.632490862 | 2.20E-07    | 46.31653981 |
| TSTD1          | NM_001113205 | 133.0193079 | 21.37327694 | 1.03E-06    | 6.223627206 |
| SAMD13         | NM_001010971 | 44.4478793  | 3.28043054  | 0.000332213 | 13.54940419 |
| CHKB-CPT1B     | NR_027928    | 98.2033481  | 7.181168223 | 3.91E-08    | 13.67512152 |
| RPP38          | NM_006414    | 181.3256137 | 13.82644468 | 1.31E-13    | 13.11440634 |
| LIPE-AS1       | NR_073180    | 204.1827566 | 1.660911469 | 6.04E-20    | 122.9341602 |
| NDUFA4         | NM_002489    | 127.8352676 | 3.920788194 | 1.61E-13    | 32.60448188 |



|                |              |             |             |             |             |
|----------------|--------------|-------------|-------------|-------------|-------------|
| UGDH           | NM_001184701 | 175.8764507 | 1.755877884 | 4.64E-21    | 100.1643977 |
| TVP23C-CDRT4   | NM_001204478 | 112.2239396 | 1.767002643 | 6.43E-11    | 63.51090652 |
| LOC100996579   | NR_110164    | 75.34620525 | 2.827361387 | 1.02E-07    | 26.64894753 |
| NXPH4          | NM_007224    | 97.67310262 | 5.113967677 | 8.16E-09    | 19.0992804  |
| LOC101927151   | NR_110689    | 81.59073644 | 1.48078023  | 5.17E-10    | 55.09982831 |
| ASUN           | NM_018164    | 57.93822536 | 2.658238003 | 1.57E-05    | 21.79572533 |
| MRPS36         | NM_033281    | 115.3462052 | 3.981831905 | 8.72E-12    | 28.96812522 |
| ZNF764         | NM_033410    | 78.46847084 | 2.630116444 | 3.97E-08    | 29.83459954 |
| COMMD4         | NR_104313    | 72.75418513 | 3.133580653 | 3.31E-07    | 23.21758818 |
| LOC101926911   | NR_110104    | 72.48906239 | 0.719012299 | 6.81E-10    | 100.8175555 |
| ILF3-AS1       | NR_024333    | 111.6936942 | 5.504454347 | 6.53E-10    | 20.29151068 |
| CDC42EP1       | NM_152243    | 129.6319195 | 18.37998678 | 8.37E-08    | 7.052884264 |
| POLR1C         | NM_203290    | 112.7541851 | 12.9775996  | 1.16E-07    | 8.688369851 |
| TPP1           | NM_000391    | 67.30502215 | 4.975032229 | 7.57E-06    | 13.52856003 |
| DLEU1          | NR_109974    | 89.10167405 | 1.185659946 | 1.78E-09    | 75.14943418 |
| RAB18          | NM_001256412 | 95.87645073 | 0.981514146 | 5.25E-11    | 97.68218939 |
| ZNF225         | NM_013362    | 41.06049096 | 0.50687745  | 1.49E-05    | 81.00674229 |
| TUBGCP4        | NM_014444    | 130.162165  | 2.425395717 | 4.86E-14    | 53.66636219 |
| RECQL4         | NM_004260    | 102.1209819 | 25.03604332 | 9.92E-05    | 4.078958509 |
| EDC4           | NM_014329    | 167.0398994 | 2.829174115 | 1.52E-18    | 59.04192978 |
| FAM57A         | NM_024792    | 100         | 9.545123211 | 9.40E-08    | 10.47655413 |
| PSME3          | NM_005789    | 124.1827566 | 8.473953916 | 2.77E-10    | 14.65464148 |
| SNRNP40        | NM_004814    | 120.5302455 | 1.978548992 | 6.44E-13    | 60.9185044  |
| PMAIP1         | NM_021127    | 169.1016741 | 8.304054091 | 2.39E-15    | 20.3637491  |
| LOC100507642   | NR_108065    | 37.93822536 | 2.54380974  | 0.00266652  | 14.91393981 |
| SNAPC1         | NM_003082    | 141.3256137 | 0.825861022 | 1.78E-17    | 171.1251772 |
| HSPD1          | NM_002156    | 143.6525111 | 8.106243475 | 3.13E-12    | 17.72121841 |
| ZMYND15        | NM_001267822 | 57.67310262 | 2.513490711 | 8.76E-06    | 22.94542103 |
| ZNF816-ZNF321P | NM_001202473 | 72.22393965 | 0.951234969 | 9.14E-08    | 75.92649768 |
| OMA1           | NM_145243    | 55.08108251 | 0.342016158 | 5.30E-07    | 161.0481882 |
| C10orf32       | NM_001136200 | 102.1209819 | 1.275625374 | 1.44E-12    | 80.05562137 |
| PTGES2-AS1     | NR_024425    | 149.1016741 | 9.841033917 | 9.68E-12    | 15.15101719 |
| HMGCL          | NM_000191    | 129.3667968 | 2.45633266  | 2.74E-13    | 52.66664362 |
| PIM2           | NM_006875    | 55.34620525 | 4.128147599 | 4.36E-05    | 13.40703159 |
| RAB2A          | NM_001242644 | 123.1222656 | 1.080762658 | 1.09E-12    | 113.9216503 |
| RALBP1         | NM_006788    | 163.1222656 | 1.241004529 | 4.20E-18    | 131.4437311 |
| SYTL1          | NM_001193308 | 81.3256137  | 15.49147259 | 0.000175247 | 5.249701938 |
| AVL9           | NM_015060    | 123.9176338 | 0.085212086 | 2.62E-19    | 1454.226028 |
| VPS33B         | NM_001289149 | 101.060491  | 3.369985727 | 1.97E-09    | 29.98840326 |
| STK17A         | NM_004760    | 180.5302455 | 1.370728567 | 6.49E-21    | 131.7038616 |
| NABP1          | NM_001254736 | 192.2239396 | 6.42027393  | 6.15E-19    | 29.94014613 |
| LUC7L          | NM_018032    | 120.5302455 | 1.296070621 | 1.94E-13    | 92.99666511 |
| TRPC4AP        | NM_015638    | 121.3256137 | 0.677624653 | 1.70E-14    | 179.0454542 |
| GSS            | NM_000178    | 152.7541851 | 5.396819461 | 1.36E-13    | 28.30448308 |
| DZIP3          | NM_014648    | 132.4890624 | 1.049583008 | 1.01E-13    | 126.2301899 |
| PIAS3          | NM_006099    | 54.81595977 | 1.556862128 | 3.50E-06    | 35.20925764 |
| ALKBH2         | NM_001001655 | 69.89704227 | 11.69495692 | 0.000246592 | 5.976682323 |
| C8orf59        | NM_001293320 | 110.6924105 | 6.441079479 | 4.70E-10    | 17.18538187 |
| CYP39A1        | NM_001278739 | 56.40669621 | 0.187943659 | 1.58E-07    | 300.1255614 |
| TEF            | NM_003216    | 51.95881691 | 0.897267709 | 7.61E-06    | 57.90781989 |
| PIGU           | NM_080476    | 80.26512274 | 1.695901738 | 1.12E-07    | 47.32887581 |
| KIAA0020       | NM_014878    | 97.93822536 | 1.554205962 | 2.39E-10    | 63.01495923 |
| COPB1          | NM_001144062 | 110.4272878 | 1.676153615 | 6.45E-12    | 65.88136478 |
| MOCOS          | NM_017947    | 171.9588169 | 0.89755094  | 2.70E-19    | 191.5866936 |
| UBA1           | NM_003334    | 60          | 4.625162684 | 5.12E-05    | 12.97251667 |
| NCDN           | NM_014284    | 155.611328  | 7.693801502 | 1.69E-13    | 20.22554493 |
| MTA2           | NM_004739    | 121.060491  | 5.873850511 | 9.66E-11    | 20.61007354 |
| NDST2          | NM_003635    | 170.162165  | 5.225508642 | 4.10E-17    | 32.56375153 |
| HNRNPA1L2      | NM_001011724 | 124.1827566 | 1.43547246  | 1.95E-14    | 86.51002374 |
| OPA3           | NM_001017989 | 71.95881691 | 2.537456814 | 6.99E-07    | 28.35863709 |
| TMEM38A        | NM_024074    | 85.97940845 | 4.682608932 | 1.49E-07    | 18.36143263 |
| RBM43          | NM_198557    | 64.4478793  | 1.191448533 | 8.86E-08    | 54.09203799 |
| SLC35F3        | NM_173508    | 47.03989941 | 0.295883904 | 3.43E-05    | 158.9809339 |
| DIP2A          | NM_001146116 | 111.6936942 | 1.593626216 | 4.63E-11    | 70.08776153 |

|               |              |             |             |             |             |
|---------------|--------------|-------------|-------------|-------------|-------------|
| NDUFC2-KCTD14 | NM_001203261 | 69.36679679 | 3.360069066 | 1.79E-06    | 20.64445564 |
| FLJ38576      | NR_046264    | 115.8764507 | 18.18709618 | 1.19E-06    | 6.371355249 |
| GPR19         | NM_006143    | 41.59073644 | 0.218281483 | 3.72E-06    | 190.5371717 |
| DUS2          | NM_001271763 | 55.61132799 | 1.10643671  | 2.44E-05    | 50.26164398 |
| ALG10         | NM_032834    | 49.89704227 | 2.559379012 | 0.000114504 | 19.49576129 |
| NIPSNAP3A     | NM_015469    | 171.9588169 | 2.96352991  | 5.49E-19    | 58.02499794 |
| TMEM63B       | NM_018426    | 34.81595977 | 2.355410551 | 0.003466736 | 14.78127019 |
| ECI1          | NM_001178029 | 121.5907364 | 7.470724354 | 2.60E-10    | 16.2756288  |
| NCK1          | NM_006153    | 187.0398994 | 0.349161062 | 2.20E-25    | 535.6837288 |
| YTHDF2        | NM_016258    | 40.53024548 | 2.982345827 | 0.001052145 | 13.59005556 |
| TMED10        | NM_006827    | 67.83526763 | 0.74737333  | 1.50E-08    | 90.76490277 |
| PTDSS1        | NM_014754    | 284.9781248 | 2.863775558 | 2.55E-30    | 99.51133356 |
| TM4SF19       | NM_138461    | 42.12098192 | 3.637418472 | 0.001860964 | 11.57991093 |
| SRF           | NM_003131    | 123.6525111 | 8.378807599 | 2.44E-10    | 14.75776948 |
| DGCR2         | NR_033674    | 118.2033481 | 2.99030017  | 1.92E-11    | 39.52892398 |
| ERRFI1        | NM_018948    | 153.5495533 | 10.02345268 | 2.65E-12    | 15.31902811 |
| DNAJC27       | NM_016544    | 113.0193079 | 1.966927434 | 1.27E-12    | 57.45982588 |
| GOLPH3        | NM_022130    | 138.7335936 | 1.954843856 | 6.54E-15    | 70.96914322 |
| RBM34         | NM_015014    | 164.713002  | 0.143127142 | 9.02E-27    | 1150.815976 |
| SIRT7         | NM_016538    | 138.7335936 | 12.24364517 | 2.43E-10    | 11.33106944 |
| GTF2H5        | NM_207118    | 232.7541851 | 0.711078768 | 2.79E-32    | 327.3254606 |
| KANK1         | NM_001256877 | 34.81595977 | 0.336686435 | 0.000535461 | 103.4076699 |
| DNAJC16       | NM_015291    | 96.67181894 | 1.832069224 | 4.54E-10    | 52.76646629 |
| ZBTB34        | NM_001099270 | 25.71428571 | 0.948602249 | 0.003147074 | 27.10755297 |
| CCRN4L        | NM_012118    | 133.0193079 | 4.509903431 | 9.58E-13    | 29.49493485 |
| PGD           | NM_002631    | 107.3050222 | 1.600295698 | 1.03E-12    | 67.05324665 |
| ALDH18A1      | NM_001017423 | 69.89704227 | 1.107243869 | 5.05E-07    | 63.1270529  |
| SUSD3         | NM_001287007 | 83.38738834 | 2.070406498 | 9.36E-09    | 40.27585327 |
| DGUOK         | NM_080918    | 130.4272878 | 3.250121969 | 9.61E-13    | 40.12996712 |
| PABPC1        | NM_002568    | 153.2844306 | 10.83496984 | 6.33E-12    | 14.14719495 |
| PRKDC         | NM_006904    | 169.3667968 | 1.872757041 | 1.38E-16    | 90.43714323 |
| ZCCHC24       | NM_153367    | 83.65251108 | 0.23314967  | 1.26E-11    | 358.7931782 |
| TTYH2         | NM_032646    | 128.8365513 | 2.795356795 | 3.62E-13    | 46.08948366 |
| TRAPPC4       | NM_016146    | 64.4478793  | 8.619563059 | 9.77E-05    | 7.476931123 |
| USP3-AS1      | NR_034080    | 200.2651227 | 9.19295864  | 1.37E-17    | 21.78462132 |
| PCOLCE-AS1    | NR_038910    | 43.65251108 | 1.760393933 | 0.000204934 | 24.7970129  |
| MANEA         | NM_024641    | 92.22393965 | 0.797962103 | 8.16E-11    | 115.5743353 |
| ARPC2         | NM_005731    | 38.2033481  | 3.569586149 | 0.002198961 | 10.70245863 |
| DENND1A       | NM_020946    | 103.1222656 | 0.389925412 | 2.92E-11    | 264.4666453 |
| IPP           | NM_001145349 | 161.8558592 | 0.325780048 | 1.12E-23    | 496.8255738 |
| DDX17         | NM_006386    | 116.6718189 | 5.949328195 | 5.10E-10    | 19.61092331 |
| LIG3          | NM_002311    | 69.89704227 | 3.232880924 | 7.14E-07    | 21.62066711 |
| KRTCAP3       | NM_173853    | 117.9382254 | 13.1285205  | 1.56E-07    | 8.983359959 |
| USP8          | NM_005154    | 152.7541851 | 0.242836834 | 1.08E-21    | 629.040424  |
| SFXN5         | NM_144579    | 103.1222656 | 1.965246021 | 5.80E-10    | 52.47295479 |
| NCBP2-AS2     | NR_024388    | 98.2033481  | 8.039510294 | 7.56E-07    | 12.21509078 |
| RPUSD1        | NM_058192    | 95.08108251 | 10.82008618 | 2.46E-06    | 8.787460736 |
| ANAPC2        | NM_013366    | 92.48906239 | 0.289108874 | 7.90E-14    | 319.9108391 |
| ZNF436        | NM_030634    | 118.4684708 | 3.906374241 | 8.06E-12    | 30.32696397 |
| GYG1          | NM_001184721 | 120.7953682 | 2.577919598 | 1.33E-12    | 46.85769421 |
| AMIGO3        | NM_198722    | 74.81595977 | 16.29581896 | 0.001038015 | 4.591113828 |
| FSD1L         | NM_001287191 | 92.48906239 | 0.307669226 | 1.05E-11    | 300.6120038 |
| MED8          | NM_201542    | 88.10039037 | 3.300411693 | 4.85E-09    | 26.6937578  |
| TCF25         | NM_014972    | 200.7953682 | 3.092300157 | 1.68E-20    | 64.93398378 |
| MNAT1         | NM_001177963 | 155.611328  | 0.416128009 | 5.48E-18    | 373.9506226 |
| C4orf27       | NM_017867    | 110.162165  | 1.099667371 | 3.21E-13    | 100.1777155 |
| TNRC18        | NM_001080495 | 37.93822536 | 2.443978233 | 0.002485836 | 15.52314372 |
| PPP4R2        | NM_174907    | 49.36679679 | 1.041963843 | 1.20E-05    | 47.3786083  |
| MTMR3         | NM_021090    | 133.0193079 | 0.730292726 | 2.08E-15    | 182.1451908 |
| EBLN3         | NR_036592    | 75.34620525 | 2.372094609 | 1.41E-07    | 31.76357509 |
| DPH2          | NM_001384    | 57.40797988 | 3.676786107 | 2.42E-05    | 15.61363055 |
| ZFP36L2       | NM_006887    | 140.7953682 | 11.89909376 | 1.74E-10    | 11.83244465 |
| NUDT8         | NM_001243750 | 102.1209819 | 6.994453315 | 3.01E-08    | 14.60028073 |
| USO1          | NM_001290049 | 87.57014489 | 1.737079607 | 1.06E-08    | 50.41228078 |

|              |              |             |             |             |             |
|--------------|--------------|-------------|-------------|-------------|-------------|
| PHF5A        | NM_032758    | 73.01930787 | 1.584434585 | 3.16E-08    | 46.08540394 |
| KIAA0907     | NM_014949    | 135.611328  | 2.732189992 | 5.72E-14    | 49.63466244 |
| TRIM35       | NM_171982    | 116.1415735 | 3.52016948  | 2.96E-11    | 32.99317664 |
| GPC2         | NM_152742    | 88.83655131 | 4.283537317 | 2.95E-08    | 20.73906324 |
| SDC4         | NM_002999    | 140         | 6.073735357 | 2.04E-12    | 23.05006586 |
| ADCK2        | NM_052853    | 115.3462052 | 1.383574508 | 1.13E-13    | 83.36826431 |
| STAM2        | NM_005843    | 74.55083703 | 0.455064333 | 1.45E-09    | 163.8248299 |
| NUTM2A-AS1   | NR_024397    | 109.3667968 | 1.678570869 | 9.21E-11    | 65.15470916 |
| LOC101927051 | NR_109952    | 54.81595977 | 5.545991197 | 0.000182852 | 9.883888707 |
| C4orf29      | NM_001039717 | 124.1827566 | 0.653070393 | 1.72E-15    | 190.1521764 |
| PPM1F        | NM_014634    | 100.5302455 | 3.08781168  | 3.32E-10    | 32.55711678 |
| NDC80        | NM_006101    | 77.93822536 | 0.472721176 | 2.78E-10    | 164.8714492 |
| SREBF1       | NM_004176    | 167.0398994 | 14.18402303 | 7.00E-12    | 11.77662354 |
| ICE2         | NM_001018089 | 157.9382254 | 0.685450165 | 6.79E-19    | 230.4153291 |
| ACO1         | NM_002197    | 135.3462052 | 1.092940863 | 1.11E-14    | 123.8367142 |
| CLP1         | NM_006831    | 64.18275656 | 3.186517444 | 4.99E-06    | 20.14197558 |
| RNF144A      | NM_014746    | 91.69369417 | 0.021048883 | 1.41E-15    | 4356.226163 |
| GPN2         | NM_018066    | 92.48906239 | 3.825630502 | 3.85E-09    | 24.1761619  |
| NUMA1        | NR_104476    | 112.4890624 | 3.343997967 | 7.59E-11    | 33.63909413 |
| TBXA2R       | NM_201636    | 66.77477667 | 0.850415568 | 2.49E-08    | 78.52017201 |
| TXNDC16      | NM_020784    | 113.2844306 | 0.746844534 | 3.03E-13    | 151.684086  |
| TIAM1        | NM_003253    | 77.14285714 | 1.318816741 | 2.77E-08    | 58.49399294 |
| METAP1D      | NM_199227    | 115.3462052 | 0.521045013 | 2.24E-14    | 221.374742  |
| PSMD9        | NR_048555    | 112.7541851 | 0.915056623 | 1.49E-13    | 123.2209923 |
| ZDHHC12      | NM_032799    | 156.1415735 | 10.53588481 | 9.27E-13    | 14.81997728 |
| CNTROB       | NM_001037144 | 87.30502215 | 3.587590755 | 2.37E-08    | 24.33527905 |
| TMEM183B     | NM_001079809 | 97.93822536 | 2.718068428 | 8.47E-10    | 36.03228835 |
| KDM4A        | NM_014663    | 38.2033481  | 3.720232906 | 0.002385317 | 10.26907429 |
| CSNK1E       | NM_001289912 | 97.67310262 | 4.327836635 | 2.88E-08    | 22.56857429 |
| MAN2B1       | NM_001173498 | 78.2033481  | 0.768309909 | 1.62E-09    | 101.7862027 |
| METTL2A      | NM_181725    | 128.1003904 | 5.884581215 | 4.07E-11    | 21.76882019 |
| POMK         | NM_032237    | 130.162165  | 1.152335653 | 8.58E-16    | 112.9550792 |
| PRPF4B       | NM_003913    | 78.99871632 | 1.794965844 | 3.99E-08    | 44.01126439 |
| IL18         | NM_001562    | 126.5096539 | 2.1891742   | 1.95E-14    | 57.78875612 |
| COPS3        | NM_001199125 | 49.10167405 | 2.547673156 | 0.000128161 | 19.27314496 |
| FANCF        | NM_022725    | 41.06049096 | 0.623863606 | 8.32E-05    | 65.81645497 |
| LHFPL2       | NM_005779    | 111.6936942 | 0.947335351 | 2.10E-12    | 117.903015  |
| UQC2         | NM_032340    | 133.0193079 | 9.771127927 | 5.74E-11    | 13.61350592 |
| TTLL7        | NM_024686    | 93.81467609 | 0.453770822 | 2.71E-11    | 206.74462   |
| HECTD1       | NM_015382    | 51.48777871 | 0.376921951 | 3.13E-06    | 136.6006374 |
| RANGAP1      | NM_002883    | 98.99871632 | 4.477725122 | 7.37E-09    | 22.10915445 |
| CEP19        | NM_032898    | 171.9588169 | 4.980721459 | 6.93E-18    | 34.52488125 |
| MRPS21       | NM_031901    | 147.5701449 | 4.965935933 | 2.64E-14    | 29.71648182 |
| DGKA         | NM_201444    | 66.24453119 | 2.944882948 | 1.30E-06    | 22.49479262 |
| REST         | NM_005612    | 114.550837  | 2.023349303 | 1.35E-12    | 56.61446437 |
| SEC23A       | NM_006364    | 95.08108251 | 0.656413169 | 1.45E-11    | 144.849444  |
| IMPDH1       | NM_001142575 | 83.38738834 | 3.139937423 | 4.61E-08    | 26.55702236 |
| LIPA         | NM_000235    | 55.61132799 | 0.599430176 | 5.75E-07    | 92.77365444 |
| CCDC110      | NM_001145411 | 63.1222656  | 1.301550514 | 1.10E-06    | 48.49774553 |
| C9orf91      | NM_153045    | 45.97940845 | 0.448180623 | 4.73E-06    | 102.5912458 |
| PRDX3        | NM_006793    | 213.8146761 | 5.34842819  | 3.17E-22    | 39.97710514 |
| TPT1         | NM_001286273 | 136.1415735 | 28.75580489 | 1.64E-06    | 4.734403158 |
| RPP25        | NM_017793    | 187.8352676 | 45.30618487 | 2.18E-07    | 4.145907853 |
| XRCC3        | NM_001100118 | 115.0810825 | 10.25542246 | 9.14E-09    | 11.22148629 |
| C19orf40     | NM_152266    | 87.03989941 | 3.930811076 | 1.67E-08    | 22.14298722 |
| MTHFD1L      | NM_001242767 | 86.24453119 | 2.041922498 | 4.79E-08    | 42.23692686 |
| RPS5         | NM_001009    | 132.4890624 | 11.17005267 | 6.52E-10    | 11.86109558 |
| GDPD1        | NM_001165994 | 106.2445312 | 0.567155899 | 8.47E-14    | 187.3286189 |
| VPS8         | NM_015303    | 111.7529015 | 0.300478198 | 3.47E-13    | 371.9168385 |
| AURKA        | NM_198437    | 47.03989941 | 1.565240452 | 0.000133046 | 30.05282629 |
| OSR1         | NM_145260    | 37.93822536 | 0.637469427 | 0.000100196 | 59.5137959  |
| PFKL         | NM_002626    | 45.71428571 | 3.485459651 | 0.000267429 | 13.11571221 |
| CCNL1        | NM_020307    | 172.2239396 | 13.92448487 | 4.24E-13    | 12.36842449 |
| ULBP1        | NM_025218    | 57.67310262 | 3.071094198 | 2.82E-05    | 18.77933365 |

|              |              |             |             |             |             |
|--------------|--------------|-------------|-------------|-------------|-------------|
| NGLY1        | NM_018297    | 103.6525111 | 0.594054308 | 5.26E-13    | 174.4832244 |
| MAP3K1       | NM_005921    | 97.40797988 | 1.291395434 | 7.21E-10    | 75.42846856 |
| HAGH         | NM_001286249 | 87.30502215 | 2.066488689 | 6.96E-10    | 42.24800389 |
| SNX24        | NM_014035    | 102.8571429 | 0.693483921 | 1.10E-11    | 148.3194342 |
| RNF213       | NM_001256071 | 109.3667968 | 0.904497893 | 2.91E-12    | 120.9143743 |
| RPUSD3       | NM_001142547 | 146.7747767 | 12.6491482  | 6.04E-11    | 11.60353048 |
| PGM3         | NM_015599    | 152.2239396 | 2.50124392  | 9.80E-16    | 60.85929421 |
| ANKRD54      | NM_138797    | 106.2445312 | 2.775372576 | 4.20E-11    | 38.28117785 |
| FAM98A       | NM_015475    | 91.95881691 | 3.589797308 | 8.12E-09    | 25.61671566 |
| GNB2         | NM_005273    | 84.4478793  | 13.0329414  | 2.13E-05    | 6.479571782 |
| STX5         | NM_001244666 | 101.5907364 | 4.430066716 | 1.72E-09    | 22.93210079 |
| NECAB3       | NM_031231    | 115.611328  | 10.41690984 | 9.02E-09    | 11.0984284  |
| C5orf55      | NM_138464    | 124.9781248 | 13.1709688  | 6.31E-08    | 9.488909028 |
| SNRPA1       | NM_003090    | 90.42728775 | 2.002152759 | 1.07E-10    | 45.16502916 |
| PRSS8        | NM_002773    | 95.34620525 | 15.20867005 | 8.72E-06    | 6.26920072  |
| CASP8AP2     | NM_001137668 | 129.3667968 | 3.301967532 | 4.34E-13    | 39.17870044 |
| AKAP8L       | NM_001291478 | 55.87645073 | 4.882613914 | 0.000137397 | 11.44396254 |
| HADH         | NM_005327    | 92.48906239 | 2.01329935  | 2.55E-09    | 45.93905144 |
| LOC101927814 | NR_110930    | 63.1222656  | 2.24049668  | 3.13E-06    | 28.17333592 |
| PODXL        | NM_001018111 | 105.9794085 | 2.93611452  | 1.73E-10    | 36.09512085 |
| MUS81        | NM_025128    | 61.06049096 | 11.72238266 | 0.001693857 | 5.208880545 |
| CCDC102A     | NM_033212    | 85.97940845 | 3.298742604 | 7.54E-08    | 26.06429746 |
| SLC1A1       | NM_004170    | 100.7953682 | 0.245095055 | 2.19E-13    | 411.2501098 |
| GSTA4        | NM_001512    | 72.22393965 | 1.352247105 | 3.62E-08    | 53.41031189 |
| CHAC1        | NM_024111    | 46.24453119 | 7.280745618 | 0.004745339 | 6.351620235 |
| DHRS13       | NM_144683    | 55.61132799 | 11.79277684 | 0.004818881 | 4.715711045 |
| CLASP2       | NM_015097    | 183.6525111 | 0.10003023  | 3.46E-26    | 1835.970093 |
| GTPBP8       | NM_138485    | 143.3873883 | 6.059741504 | 4.09E-13    | 23.66229455 |
| SS18         | NM_001007559 | 178.4684708 | 1.06544841  | 7.89E-20    | 167.5055021 |
| REV3L        | NM_001286432 | 96.14157347 | 1.257600178 | 2.10E-09    | 76.44844134 |
| ZNF33B       | NM_006955    | 175.0810825 | 1.564188438 | 1.57E-19    | 111.9309402 |
| CASC4        | NM_138423    | 140.7953682 | 0.381557164 | 1.39E-17    | 369.0020303 |
| PCGF6        | NM_001011663 | 118.9987163 | 0.874460555 | 8.22E-14    | 136.0824289 |
| YLPM1        | NM_019589    | 174.8159598 | 0.538494472 | 7.83E-23    | 324.6383555 |
| NOXA1        | NM_001256067 | 80.26512274 | 13.39130394 | 5.02E-05    | 5.993824283 |
| HEIH         | NR_045680    | 101.3256137 | 22.22860995 | 0.000186301 | 4.558342331 |
| FAM171A2     | NM_198475    | 114.550837  | 5.462938595 | 1.03E-10    | 20.96872133 |
| MED24        | NM_001267797 | 44.18275656 | 2.198937411 | 0.000483098 | 20.09277587 |
| COQ3         | NM_017421    | 121.060491  | 1.883140453 | 1.20E-13    | 64.28649057 |
| G6PD         | NM_001042351 | 61.06049096 | 6.896687543 | 0.000237496 | 8.853596829 |
| NUDT21       | NM_007006    | 63.91763382 | 0.357188331 | 2.39E-09    | 178.9465898 |
| CUL4A        | NM_003589    | 154.550837  | 1.266195465 | 3.33E-17    | 122.0592249 |
| MTPAP        | NM_018109    | 49.89704227 | 1.409454584 | 9.47E-05    | 35.40166731 |
| ATP6AP2      | NM_005765    | 24.18275656 | 0.449457323 | 0.004601697 | 53.80434435 |
| IL15RA       | NM_172200    | 55.87645073 | 0.191922206 | 6.14E-09    | 291.1411438 |
| SLC52A3      | NM_033409    | 74.81595977 | 3.857931221 | 2.79E-07    | 19.39276661 |
| LOC150776    | NR_026922    | 64.4478793  | 2.724956113 | 1.64E-06    | 23.65097882 |
| CALB2        | NM_001740    | 49.63191953 | 1.503892459 | 8.27E-05    | 33.00230628 |
| MRV11-AS1    | NR_034094    | 124.713002  | 1.921397147 | 4.76E-13    | 64.90745664 |
| TMEM179B     | NM_199337    | 167.5701449 | 23.87420939 | 9.09E-10    | 7.018877239 |
| ANKRD18A     | NM_147195    | 66.77477667 | 0.578865501 | 2.39E-08    | 115.3545627 |
| HSPA5        | NM_005347    | 177.9382254 | 7.265690617 | 1.86E-16    | 24.49020124 |
| SMAP1        | NM_021940    | 146.5096539 | 0.563325753 | 9.34E-17    | 260.0798086 |
| FLII         | NM_002018    | 87.83526763 | 4.588858469 | 2.37E-08    | 19.14098424 |
| CASP9        | NR_102733    | 40          | 1.865882636 | 0.000862041 | 21.43757556 |
| UBQLN1       | NM_053067    | 52.48906239 | 2.378593997 | 7.49E-05    | 22.0672643  |
| MRPL27       | NM_016504    | 150.6924105 | 3.991599122 | 5.09E-16    | 37.75239093 |
| LAMTOR5      | NM_006402    | 56.93694168 | 7.687152131 | 0.000833253 | 7.406766604 |
| TBC1D20      | NR_111901    | 109.3667968 | 3.03946604  | 2.06E-10    | 35.98224009 |
| SUPT16H      | NM_007192    | 61.85585918 | 4.245137577 | 3.33E-05    | 14.57099047 |
| B3GNT3       | NM_014256    | 169.3667968 | 3.011865705 | 1.82E-18    | 56.23318347 |
| MREG         | NM_018000    | 38.2033481  | 1.878249951 | 0.00220614  | 20.33986375 |
| FZD2         | NM_001466    | 28.83655131 | 1.418447196 | 0.002582849 | 20.32966147 |
| TMEM39A      | NM_018266    | 67.83526763 | 1.682667419 | 5.32E-07    | 40.31412677 |

|              |              |             |             |             |             |
|--------------|--------------|-------------|-------------|-------------|-------------|
| SUFU         | NM_016169    | 98.2033481  | 2.442982533 | 2.71E-09    | 40.19813763 |
| SERPINE2     | NM_006216    | 106.2445312 | 1.118048003 | 3.24E-11    | 95.02680644 |
| ENOX2        | NM_182314    | 69.10167405 | 0.194263786 | 3.61E-08    | 355.7105291 |
| SMARCD1      | NM_003076    | 57.93822536 | 1.582664154 | 3.13E-06    | 36.60803539 |
| CLCN6        | NM_001286    | 41.3256137  | 0.293013261 | 1.73E-05    | 141.0366669 |
| ZC3HAV1L     | NM_080660    | 152.2239396 | 8.484721353 | 9.70E-13    | 17.94094742 |
| MAFF         | NM_012323    | 84.18275656 | 5.323002804 | 8.48E-07    | 15.81489991 |
| HMGCS1       | NM_001098272 | 109.3667968 | 1.525534541 | 1.99E-12    | 71.69080336 |
| LOC101927755 | NR_110815    | 50.69241049 | 0.240121149 | 1.66E-07    | 211.1118104 |
| TMEM30A      | NM_001143958 | 100.2651227 | 1.362666024 | 3.65E-11    | 73.58011497 |
| AK4          | NM_203464    | 82.12098192 | 0.869407197 | 1.10E-09    | 94.45629413 |
| GOLGA1       | NM_002077    | 109.8970423 | 1.273913655 | 1.96E-11    | 86.26726138 |
| MDFIC        | NM_001166345 | 49.63191953 | 0.22654607  | 3.18E-06    | 219.0809111 |
| SLC35G2      | NM_025246    | 71.42857143 | 1.629372793 | 2.59E-07    | 43.83807791 |
| MPHOSPH9     | NM_022782    | 164.1827566 | 0.469625637 | 1.70E-21    | 349.6034788 |
| SPINT1       | NM_181642    | 129.3667968 | 5.13114999  | 4.50E-12    | 25.21204741 |
| PRPS1        | NM_002764    | 66.50965393 | 1.88190708  | 7.03E-07    | 35.34162479 |
| LLPH-AS1     | NR_125724    | 170.6924105 | 11.34398322 | 5.75E-14    | 15.04695548 |
| ACAT2        | NM_005891    | 89.36679679 | 3.983155202 | 2.68E-08    | 22.43618244 |
| LAMC1        | NM_002293    | 86.24453119 | 1.173764023 | 1.40E-09    | 73.47689099 |
| EIF3A        | NM_003750    | 156.1415735 | 5.63419296  | 1.51E-14    | 27.71321014 |
| TRMT2B       | NM_001167972 | 35.08108251 | 1.705032869 | 0.003589065 | 20.57501832 |
| PNMA1        | NM_006029    | 108.1003904 | 15.35840081 | 2.55E-06    | 7.038518641 |
| BCDIN3D      | NM_181708    | 146.5096539 | 8.585112489 | 9.30E-13    | 17.06554854 |
| SLC25A6      | NM_001636    | 70.16216501 | 13.18014646 | 0.000500077 | 5.323322108 |
| LINC00941    | NR_040245    | 135.3462052 | 11.60837077 | 2.87E-10    | 11.65936271 |
| MAP2K4       | NM_003010    | 127.8352676 | 1.28075304  | 5.10E-13    | 99.81258183 |
| JUN          | NM_002228    | 110.4272878 | 12.148153   | 1.38E-07    | 9.090047497 |
| FAM227A      | NM_001291030 | 41.59073644 | 1.100656454 | 6.03E-05    | 37.78720989 |
| VPS53        | NM_018289    | 92.75418513 | 0.130488583 | 3.81E-12    | 710.8222249 |
| E4F1         | NM_001288776 | 84.4478793  | 5.35483828  | 3.13E-07    | 15.77038836 |
| TTYH3        | NM_025250    | 46.24453119 | 3.034315509 | 0.00027386  | 15.24051506 |
| LINC01273    | NR_109943    | 123.1222656 | 5.785345234 | 8.21E-12    | 21.28174908 |
| MCM3         | NM_001270472 | 33.81467609 | 3.643729441 | 0.003635942 | 9.280237909 |
| CD2AP        | NM_012120    | 117.6731026 | 0.710257045 | 2.06E-13    | 165.6767835 |
| EPPK1        | NM_031308    | 34.81595977 | 3.137159652 | 0.002815774 | 11.09792412 |
| WDR59        | NM_030581    | 92.48906239 | 1.689043406 | 6.82E-09    | 54.75825076 |
| WHAMM        | NM_001080435 | 115.3462052 | 0.08693757  | 8.78E-19    | 1326.770525 |
| UQCC1        | NM_199487    | 81.06049096 | 1.713829179 | 1.08E-07    | 47.2978824  |
| RFXAP        | NM_000538    | 78.46847084 | 1.561616276 | 1.99E-09    | 50.2482409  |
| RBFA         | NM_024805    | 117.9382254 | 1.93497493  | 6.34E-13    | 60.95077695 |
| LZTS3        | NM_001282533 | 83.38738834 | 2.190436407 | 9.13E-09    | 38.06884696 |
| GTF3C1       | NM_001286242 | 108.8365513 | 1.346207141 | 4.86E-11    | 80.84680877 |
| CUL7         | NM_014780    | 155.0810825 | 4.761770527 | 6.16E-15    | 32.56794539 |
| CRK          | NM_005206    | 182.8571429 | 3.131266531 | 1.21E-18    | 58.39718243 |
| FLJ21408     | NR_037184    | 38.99871632 | 2.379925791 | 0.000790941 | 16.3865262  |
| ZNF678       | NR_102302    | 80.53024548 | 0.276827488 | 3.48E-10    | 290.9040792 |
| LYRM2        | NR_028495    | 97.40797988 | 1.881441621 | 5.26E-12    | 51.77305467 |
| TDG          | NM_003211    | 155.3462052 | 4.620547256 | 2.43E-15    | 33.62073725 |
| SLC16A1-AS1  | NR_103744    | 109.8970423 | 1.224114922 | 3.57E-14    | 89.77673608 |
| PDK3         | NM_005391    | 140.5302455 | 0.108386787 | 1.49E-22    | 1296.562514 |
| TBX3         | NM_016569    | 151.6936942 | 1.716545635 | 1.71E-18    | 88.37148927 |
| ERO1L        | NM_014584    | 151.9588169 | 1.046540814 | 2.33E-17    | 145.2010423 |
| CDC42BPG     | NM_017525    | 69.36679679 | 4.578942348 | 6.44E-06    | 15.14908717 |
| PLA2G10      | NM_003561    | 34.55083703 | 3.016188448 | 0.003485432 | 11.45513207 |
| ERLIN2       | NM_001003790 | 92.22393965 | 2.661959929 | 8.26E-10    | 34.64512693 |
| ATG14        | NM_014924    | 87.83526763 | 1.316637144 | 2.32E-09    | 66.71182566 |
| RBM45        | NM_152945    | 166.5096539 | 1.850259949 | 1.08E-19    | 89.99257323 |
| FAM53C       | NM_016605    | 126.7747767 | 9.055737348 | 2.10E-10    | 13.99938755 |
| CUTC         | NM_015960    | 161.8558592 | 4.326049443 | 2.13E-16    | 37.41424164 |
| COLGALT1     | NM_024656    | 52.48906239 | 1.378293724 | 3.02E-05    | 38.08263905 |
| TMEM65       | NM_194291    | 143.1222656 | 0.381252072 | 7.77E-20    | 375.4006239 |
| DPCD         | NM_015448    | 54.87516705 | 1.330247848 | 9.29E-06    | 41.25183675 |
| FAM46B       | NM_052943    | 81.85585918 | 2.073799504 | 2.88E-09    | 39.47144312 |

|              |              |             |             |             |             |
|--------------|--------------|-------------|-------------|-------------|-------------|
| CFAP99       | NM_001193282 | 18.73359358 | 0.015684115 | 0.002143505 | 1194.431014 |
| FBXO31       | NM_001282683 | 155.611328  | 3.678088837 | 2.55E-14    | 42.30765892 |
| CNP          | NM_033133    | 173.0193079 | 13.63498372 | 6.13E-13    | 12.68936666 |
| DHODH        | NM_001361    | 104.4478793 | 3.305157854 | 1.47E-10    | 31.60147984 |
| TMEM194B     | NM_001142645 | 137.4079799 | 1.897750551 | 1.20E-15    | 72.40571201 |
| PSME2        | NM_002818    | 157.4079799 | 8.836144422 | 3.40E-13    | 17.81410221 |
| MEAF6        | NR_073091    | 92.48906239 | 0.87030917  | 4.34E-11    | 106.2715017 |
| RAB3A        | NM_002866    | 111.9588169 | 7.254951842 | 1.15E-09    | 15.43205515 |
| METTL6       | NM_152396    | 69.36679679 | 1.252184147 | 7.92E-08    | 55.39664191 |
| USP11        | NM_004651    | 77.93822536 | 1.281816241 | 3.41E-09    | 60.80296289 |
| POM121       | NM_001257190 | 99.26383906 | 4.813250083 | 1.28E-08    | 20.62303794 |
| CHTF18       | NM_022092    | 69.36679679 | 4.992560405 | 1.38E-05    | 13.89403255 |
| FAM24B       | NM_001204364 | 59.5289618  | 1.381867941 | 3.41E-06    | 43.07861846 |
| PEG10        | NM_001040152 | 24.18275656 | 0.350324992 | 0.002507659 | 69.02949289 |
| B9D1         | NM_015681    | 78.46847084 | 5.939082604 | 5.34E-06    | 13.21222082 |
| FLJ22447     | NR_039985    | 26.77477667 | 0.627215624 | 0.004266239 | 42.68831268 |
| CCDC38       | NM_182496    | 69.10167405 | 0.46776377  | 1.60E-08    | 147.7277175 |
| CDC42SE1     | NM_020239    | 132.4890624 | 7.197424021 | 8.82E-12    | 18.40784453 |
| MRPL15       | NM_014175    | 113.2844306 | 4.909159223 | 1.76E-10    | 23.07613696 |
| C8orf76      | NM_032847    | 167.5701449 | 3.828512792 | 1.54E-17    | 43.76899177 |
| CHURC1       | NM_145165    | 50.16216501 | 2.911384348 | 4.91E-05    | 17.22966088 |
| FAM175B      | NM_032182    | 86.83398396 | 1.032737328 | 1.52E-09    | 84.08138413 |
| HARS2        | NM_001278731 | 115.0810825 | 6.071352737 | 3.76E-10    | 18.95476799 |
| VAMP4        | NR_033704    | 102.6512274 | 1.434590633 | 4.36E-11    | 71.5543689  |
| LINC00886    | NR_038387    | 58.73359358 | 1.156979218 | 7.17E-06    | 50.7646055  |
| GPD2         | NM_000408    | 106.2445312 | 1.201750294 | 1.96E-10    | 88.40815907 |
| SETDB1       | NM_012432    | 35.08108251 | 3.064341538 | 0.004075762 | 11.44816336 |
| IRF6         | NM_006147    | 138.2033481 | 2.653282389 | 1.84E-14    | 52.08768907 |
| CAP2         | NM_006366    | 54.55083703 | 0.486999248 | 2.89E-06    | 112.0142119 |
| RNPS1        | NM_001286627 | 121.8558592 | 8.752966816 | 7.23E-10    | 13.92166356 |
| APIG1        | NM_001030007 | 80.53024548 | 1.773467814 | 8.41E-08    | 45.40834903 |
| GPR162       | NM_019858    | 62.85714286 | 14.56292943 | 0.002723747 | 4.316243044 |
| NEO1         | NM_002499    | 52.22393965 | 0.369092497 | 6.82E-06    | 141.4928237 |
| C1orf204     | NM_001134233 | 46.50965393 | 5.609514811 | 0.00139434  | 8.291207974 |
| INCA1        | NM_001167987 | 112.4890624 | 4.585371457 | 9.77E-11    | 24.53215916 |
| PMF1         | NM_001199654 | 81.59073644 | 1.651446559 | 5.92E-09    | 49.40561716 |
| URGCP-MRPS24 | NM_001204871 | 37.14285714 | 3.37537936  | 0.0022094   | 11.00405412 |
| LOC100507419 | NR_123723    | 89.10167405 | 1.570644213 | 1.07E-10    | 56.72938104 |
| VPS9D1       | NM_004913    | 213.8146761 | 29.24009686 | 1.36E-12    | 7.312379201 |
| SMAD2        | NM_005901    | 100.7953682 | 0.971154969 | 1.64E-11    | 103.7891701 |
| CSNK1D       | NR_110578    | 137.4079799 | 10.99807136 | 1.23E-10    | 12.49382509 |
| LOC101927795 | NR_110275    | 101.8558592 | 4.294348748 | 2.44E-09    | 23.71858113 |
| SNRPG        | NM_003096    | 113.2844306 | 4.427881452 | 9.71E-11    | 25.58434137 |
| PPP3CA       | NM_001130692 | 78.2033481  | 1.806823314 | 3.58E-07    | 43.28223325 |
| CPE          | NM_001873    | 80.53024548 | 0.767104453 | 3.47E-09    | 104.9795047 |
| LAMTOR1      | NM_017907    | 126.7747767 | 9.921571549 | 9.09E-10    | 12.77769112 |
| LSM8         | NM_016200    | 66.77477667 | 4.678404766 | 1.27E-05    | 14.27297979 |
| UBE2D1       | NM_003338    | 144.4478793 | 0.947478623 | 8.53E-18    | 152.4550272 |
| ZNF561-AS1   | NR_122038    | 152.2239396 | 0.594403901 | 2.10E-21    | 256.0951222 |
| FAM149B1     | NM_173348    | 117.9382254 | 1.480341125 | 4.28E-12    | 79.66962706 |
| CSTF1        | NM_001033522 | 86.24453119 | 1.349446429 | 1.09E-10    | 63.91104479 |
| MYPOP        | NM_001012643 | 140.2651227 | 2.389175437 | 3.11E-16    | 58.70859065 |
| ZNF561       | NM_152289    | 118.9987163 | 2.758026444 | 6.40E-13    | 43.14632899 |
| MED23        | NM_004830    | 98.2033481  | 2.004085546 | 4.66E-10    | 49.00157495 |
| ANKLE1       | NM_001278444 | 83.1222656  | 7.278636577 | 1.31E-06    | 11.42003241 |
| PIM3         | NM_001001852 | 83.38738834 | 14.66651439 | 7.27E-05    | 5.685562782 |
| PTPN11       | NM_080601    | 169.1016741 | 1.855267831 | 7.84E-18    | 91.14677204 |
| KIAA1462     | NM_020848    | 111.6936942 | 0.93586538  | 1.21E-12    | 119.3480351 |
| C21orf119    | NR_026845    | 203.6525111 | 42.33890442 | 1.42E-06    | 4.810056232 |
| FBXW2        | NM_012164    | 161.060491  | 2.847651389 | 4.86E-16    | 56.55906181 |
| LRPAP1       | NM_002337    | 138.2033481 | 1.123324698 | 9.77E-17    | 123.0306325 |
| PPARGC1B     | NM_001172698 | 110.162165  | 1.187842259 | 3.47E-11    | 92.74140921 |
| GSR          | NM_000637    | 115.8764507 | 2.69349691  | 6.74E-12    | 43.02082185 |
| ORMDL1       | NM_001128150 | 212.7541851 | 7.008349804 | 2.82E-20    | 30.35724401 |

|               |              |             |             |             |             |
|---------------|--------------|-------------|-------------|-------------|-------------|
| EEF1G         | NM_001404    | 92.75418513 | 7.800689894 | 1.82E-07    | 11.89051051 |
| SERPINB5      | NM_002639    | 86.77477667 | 1.64039507  | 2.90E-09    | 52.89870608 |
| IWS1          | NM_017969    | 104.4478793 | 1.648763199 | 3.61E-11    | 63.34923012 |
| VPS35         | NM_018206    | 89.63191953 | 1.322975547 | 8.06E-10    | 67.75024657 |
| SLC9B2        | NM_178833    | 66.24453119 | 0.590353028 | 2.77E-08    | 112.2117243 |
| TXNDC11       | NM_015914    | 160.5302455 | 1.023964135 | 4.03E-18    | 156.7733088 |
| ROPN1B        | NM_001012337 | 97.46718716 | 1.772199347 | 1.30E-11    | 54.9978688  |
| SIRT1         | NM_012238    | 126.5096539 | 2.518184071 | 2.07E-13    | 50.23844578 |
| SEC22B        | NM_004892    | 113.2844306 | 0.075487164 | 8.78E-19    | 1500.711171 |
| TMEM201       | NM_001010866 | 42.85714286 | 1.811504744 | 0.000239068 | 23.65831114 |
| SPATA5L1      | NM_024063    | 103.9176338 | 1.703599329 | 5.46E-12    | 60.99886989 |
| STYX          | NM_001130701 | 105.2432475 | 1.062923769 | 9.06E-12    | 99.01297775 |
| BTBD7         | NM_001002860 | 109.3667968 | 1.6817584   | 8.08E-11    | 65.03121778 |
| PELP1         | NM_014389    | 129.3667968 | 1.799734612 | 2.61E-14    | 71.88104062 |
| NIFK          | NM_032390    | 120.7953682 | 5.15687323  | 1.60E-11    | 23.42414925 |
| ARHGAP19      | NM_032900    | 100.7953682 | 0.609406056 | 1.97E-12    | 165.3993543 |
| FRYL          | NM_015030    | 110.4272878 | 0.196284223 | 1.46E-13    | 562.5887109 |
| GAS5          | NR_002578    | 187.3050222 | 28.45547832 | 2.30E-10    | 6.582388813 |
| ENTPD3-AS1    | NR_040100    | 48.83655131 | 0.110580246 | 3.55E-07    | 441.6390188 |
| FAM86JP       | NR_024250    | 97.67310262 | 0.847767455 | 4.42E-13    | 115.2121399 |
| NAPA-AS1      | NR_038452    | 88.83655131 | 2.268588709 | 8.06E-10    | 39.15939057 |
| LOC101927204  | NR_110184    | 81.85585918 | 1.381910785 | 1.07E-09    | 59.23382323 |
| HAUS8         | NM_001011699 | 83.91763382 | 4.304003581 | 2.46E-07    | 19.49757528 |
| STEAP1        | NM_012449    | 85.50837026 | 2.13972992  | 3.27E-09    | 39.96222583 |
| PARD6B        | NM_032521    | 105.773493  | 3.60553894  | 4.12E-10    | 29.33638902 |
| ERCC8         | NM_001290285 | 41.06049096 | 0.105715505 | 1.03E-05    | 388.4055692 |
| DNPEP         | NM_012100    | 131.4285714 | 4.56885669  | 1.76E-12    | 28.76618383 |
| ZFHX2         | NM_033400    | 50.16216501 | 3.426166972 | 7.14E-05    | 14.64089912 |
| WFDC3         | NM_080614    | 38.73359358 | 2.225485929 | 0.000656274 | 17.4045556  |
| SRSF6         | NR_034009    | 215.0810825 | 10.01374717 | 4.66E-19    | 21.47858129 |
| ADPRH         | NM_001291949 | 47.30502215 | 1.493210986 | 1.87E-05    | 31.68006572 |
| TXN           | NM_003329    | 120.5302455 | 7.602863233 | 7.09E-10    | 15.85327025 |
| SLC7A1        | NM_003045    | 71.42857143 | 2.305046102 | 8.69E-07    | 30.98791446 |
| DIMT1         | NM_014473    | 158.2033481 | 3.174875372 | 2.55E-17    | 49.82978214 |
| RWDD2B        | NM_016940    | 103.9176338 | 1.549781467 | 9.90E-13    | 67.05308847 |
| VSIG10        | NM_019086    | 129.8970423 | 1.734694491 | 5.02E-14    | 74.88179791 |
| ZBTB8B        | NM_001145720 | 29.10167405 | 0.634688678 | 0.000944092 | 45.85188782 |
| SRSF8         | NM_032102    | 105.9794085 | 23.88523182 | 8.35E-05    | 4.43702658  |
| TRNAU1AP      | NR_003109    | 127.0398994 | 6.846534493 | 1.04E-10    | 18.55535812 |
| EIF2S1        | NM_004094    | 120         | 3.3067486   | 1.16E-11    | 36.28942339 |
| MFI2          | NM_005929    | 81.06049096 | 7.304029884 | 4.45E-06    | 11.09805029 |
| RAB8B         | NM_016530    | 83.91763382 | 0.569102604 | 3.69E-10    | 147.4560707 |
| MPHOSPH6      | NM_005792    | 184.4478793 | 2.35835746  | 6.16E-21    | 78.21031479 |
| IPO9-AS1      | NR_046696    | 75.08108251 | 1.577190522 | 4.71E-07    | 47.60432011 |
| HDCC3         | NR_104447    | 158.4684708 | 35.95668416 | 2.98E-06    | 4.407204795 |
| MAN2A1        | NM_002372    | 135.3462052 | 1.092537512 | 9.65E-15    | 123.8824331 |
| RAB5C         | NM_201434    | 30.42728775 | 0.68272951  | 0.000533537 | 44.56711963 |
| LOC102723582  | NR_125405    | 137.9382254 | 3.187602739 | 1.13E-13    | 43.27334259 |
| PSPH          | NM_004577    | 112.7541851 | 4.776451953 | 5.09E-10    | 23.60626386 |
| PFDN2         | NM_012394    | 113.5495533 | 2.755230911 | 8.08E-12    | 41.21235461 |
| JMJD7-PLA2G4B | NM_001198588 | 141.8558592 | 0.50403815  | 1.21E-20    | 281.4387346 |
| THEM4         | NM_053055    | 203.1222656 | 3.277570442 | 1.26E-20    | 61.97342489 |
| CLIP1         | NM_001247997 | 72.22393965 | 1.329274994 | 8.76E-07    | 54.33333206 |
| RBCK1         | NM_031229    | 123.1222656 | 6.656607819 | 1.59E-10    | 18.49624748 |
| ANP32A        | NM_006305    | 95.08108251 | 3.877305238 | 2.50E-08    | 24.52246513 |
| SERP1         | NM_014445    | 83.91763382 | 7.132203262 | 6.94E-07    | 11.76601826 |
| LRRC28        | NM_001284400 | 125.7142857 | 0.215466526 | 9.98E-17    | 583.4515844 |
| TACC3         | NM_006342    | 54.81595977 | 3.850902972 | 0.000182852 | 14.23457308 |
| ZBTB9         | NM_152735    | 131.6936942 | 13.52800105 | 8.47E-09    | 9.734896806 |
| PSMC6         | NM_002806    | 86.77477667 | 2.721099935 | 4.58E-09    | 31.88959566 |
| ARFGAP2       | NM_001242832 | 72.48906239 | 4.98318462  | 2.01E-06    | 14.54673425 |
| LINC01461     | NR_125761    | 66.77477667 | 1.805048712 | 6.76E-07    | 36.99333776 |
| PDE6D         | NM_001291018 | 144.4478793 | 0.98983988  | 5.95E-17    | 145.9305512 |
| GOLGB1        | NM_004487    | 149.8970423 | 0.93137528  | 2.94E-16    | 160.9416155 |

|               |              |             |             |             |             |
|---------------|--------------|-------------|-------------|-------------|-------------|
| ILF2          | NM_001267809 | 115.611328  | 6.096904576 | 6.75E-10    | 18.96229907 |
| TRIM14        | NM_033219    | 76.40669621 | 2.660022176 | 1.06E-07    | 28.72408241 |
| MTHFS         | NM_006441    | 187.3050222 | 1.209838994 | 7.36E-22    | 154.8181395 |
| VAMP8         | NM_003761    | 97.93822536 | 2.880039663 | 4.10E-10    | 34.00585992 |
| SNAI2         | NM_003068    | 35.61132799 | 0.199709772 | 5.67E-05    | 178.3154008 |
| ITGB1         | NM_002211    | 71.95881691 | 1.398303735 | 3.93E-07    | 51.46150661 |
| IMPAD1        | NM_017813    | 71.42857143 | 0.478786788 | 9.99E-10    | 149.1865966 |
| MICU1         | NM_001195518 | 49.63191953 | 0.586879047 | 1.81E-05    | 84.56924783 |
| RSBN1         | NM_018364    | 63.65251108 | 0.258458246 | 9.13E-09    | 246.2777338 |
| ZC3H7B        | NM_017590    | 78.73359358 | 1.316162894 | 3.91E-08    | 59.82055406 |
| WDR33         | NM_001006623 | 86.77477667 | 1.605186603 | 1.70E-08    | 54.05899632 |
| PDXP          | NM_020315    | 100.5302455 | 5.135205938 | 2.35E-09    | 19.57667262 |
| FBXO36        | NM_174899    | 75.87645073 | 1.057646127 | 8.04E-09    | 71.74086759 |
| PTCD3         | NM_017952    | 136.6718189 | 3.523326248 | 3.84E-13    | 38.79056588 |
| OFD1          | NM_003611    | 88.57142857 | 0.142317414 | 2.43E-14    | 622.3513071 |
| UBALD1        | NM_145253    | 61.06049096 | 4.329911016 | 4.92E-05    | 14.10201982 |
| DDX47         | NM_016355    | 33.28443061 | 1.466206684 | 0.00205111  | 22.70104957 |
| CYB5RL        | NM_001031672 | 92.75418513 | 0.436274955 | 4.98E-12    | 212.6048817 |
| VAPB          | NR_036633    | 40.79536822 | 1.973509513 | 0.00112494  | 20.67148294 |
| HID1          | NM_030630    | 91.75290145 | 0.591896044 | 6.83E-12    | 155.0152301 |
| COX4I1        | NM_001861    | 123.4465956 | 13.02189814 | 7.57E-09    | 9.479923306 |
| RIOK3         | NM_003831    | 52.48906239 | 3.48221248  | 7.18E-05    | 15.07348064 |
| LMBRD1        | NM_018368    | 29.36679679 | 0.021603518 | 0.000178833 | 1359.352559 |
| YTHDC2        | NM_022828    | 109.8970423 | 0.399800835 | 5.01E-14    | 274.8794719 |
| PSEN1         | NM_007318    | 129.3667968 | 0.861191314 | 2.99E-15    | 150.2184179 |
| HERPUD2       | NM_022373    | 110.162165  | 0.636521096 | 4.45E-14    | 173.0691501 |
| TMED8         | NM_213601    | 118.2033481 | 1.699949485 | 7.09E-13    | 69.53344741 |
| ZHX2          | NM_014943    | 56.14157347 | 0.49739479  | 1.58E-06    | 112.8712536 |
| ALG12         | NM_024105    | 102.1209819 | 3.989525465 | 4.41E-10    | 25.59727537 |
| BCKDHA        | NM_000709    | 81.06049096 | 1.658582219 | 1.41E-08    | 48.87336306 |
| PFKFB2        | NM_006212    | 155.611328  | 2.268903187 | 1.28E-16    | 68.58438424 |
| RELL2         | NM_173828    | 118.4684708 | 12.56371967 | 1.98E-08    | 9.429410552 |
| SYMPK         | NM_004819    | 44.18275656 | 3.925613124 | 0.000652458 | 11.25499512 |
| UROD          | NM_000374    | 53.54955335 | 10.6693858  | 0.003261258 | 5.018991193 |
| RPLP0         | NM_053275    | 186.5096539 | 29.5423211  | 6.84E-10    | 6.313303998 |
| KIF2A         | NM_001243952 | 98.46847084 | 0.879518798 | 1.91E-11    | 111.9572101 |
| SLC16A5       | NM_004695    | 221.5907364 | 7.206154716 | 7.45E-21    | 30.75020523 |
| ZNF394        | NM_032164    | 90.95753323 | 0.467805718 | 3.96E-13    | 194.4344196 |
| KIF11         | NM_004523    | 81.06049096 | 1.235339893 | 3.91E-08    | 65.61796591 |
| DENR          | NM_003677    | 169.8970423 | 3.302319543 | 3.03E-18    | 51.44778998 |
| PPP4R1L       | NR_003505    | 117.6731026 | 0.778677853 | 3.49E-14    | 151.1191081 |
| TRIP10        | NM_001288963 | 74.55083703 | 12.85633524 | 0.000163277 | 5.798762685 |
| WDR92         | NR_046234    | 62.85714286 | 0.847109897 | 3.78E-07    | 74.20187518 |
| POMZP3        | NM_152992    | 173.5495533 | 5.834178346 | 8.75E-17    | 29.74704287 |
| OCRL          | NM_000276    | 49.10167405 | 0.856877646 | 8.03E-06    | 57.30301671 |
| SAR1B         | NM_016103    | 101.060491  | 0.366916632 | 2.31E-13    | 275.4317526 |
| TBC1D10A      | NM_001204240 | 100.5302455 | 3.36351982  | 3.95E-09    | 29.88840586 |
| KIAA0355      | NM_014686    | 43.91763382 | 0.508438762 | 4.36E-05    | 86.37743043 |
| ZNF318        | NM_014345    | 54.81595977 | 0.836126713 | 8.10E-07    | 65.55939295 |
| ITGB3BP       | NR_045147    | 172.2239396 | 0.076575074 | 2.28E-28    | 2249.086176 |
| SYCE2         | NM_001105578 | 32.48906239 | 1.440891038 | 0.004835826 | 22.54789677 |
| PES1          | NM_001243225 | 57.93822536 | 3.246365482 | 5.56E-05    | 17.84710492 |
| FAM161B       | NM_152445    | 95.61132799 | 4.579748334 | 8.08E-09    | 20.87698297 |
| HDDC2         | NM_016063    | 57.93822536 | 1.845069584 | 9.01E-06    | 31.40164786 |
| OPRL1         | NM_000913    | 23.65251108 | 0.100537769 | 0.001117675 | 235.2599562 |
| FKBP1A-SDCBP2 | NR_037661    | 138.2033481 | 4.709074634 | 3.03E-12    | 29.34830277 |
| LINC00240     | NR_026775    | 51.69369417 | 0.484437389 | 2.34E-06    | 106.7087211 |
| SMO           | NM_005631    | 43.65251108 | 0.574542551 | 9.68E-06    | 75.97785573 |
| BMP8B         | NM_001720    | 120.5302455 | 2.760477719 | 9.95E-13    | 43.66282135 |
| NET1          | NR_073040    | 78.73359358 | 2.942083086 | 7.21E-08    | 26.76117271 |
| TMED5         | NM_016040    | 52.48906239 | 2.599024432 | 6.10E-05    | 20.19567871 |
| RBM20         | NM_001134363 | 89.36679679 | 0.352946138 | 2.00E-10    | 253.2023648 |
| ARL6IP6       | NM_152522    | 49.89704227 | 3.403862717 | 0.000163665 | 14.65894674 |
| LINC01351     | NR_110717    | 40.53024548 | 4.872943132 | 0.003793138 | 8.317405802 |



|                |              |             |             |             |             |
|----------------|--------------|-------------|-------------|-------------|-------------|
| KIAA1429       | NM_183009    | 38.73359358 | 1.167505287 | 0.000763362 | 33.17637531 |
| TMEM259        | NM_001033026 | 58.46847084 | 3.224359505 | 3.84E-05    | 18.13335974 |
| PPIL4          | NM_139126    | 64.4478793  | 1.45387019  | 1.20E-06    | 44.32849627 |
| USP46-AS1      | NR_125363    | 115.0810825 | 22.54011963 | 1.68E-05    | 5.105610989 |
| MIP            | NM_021933    | 95.08108251 | 4.848530021 | 3.14E-08    | 19.61029056 |
| LOC339874      | NR_038976    | 87.03989941 | 3.184615444 | 2.61E-08    | 27.33136887 |
| TTC13          | NM_001122835 | 69.89704227 | 0.445077796 | 1.32E-08    | 157.0445501 |
| ITPR1-AS1      | NR_108075    | 109.6319195 | 10.20006861 | 9.29E-08    | 10.74815511 |
| TPST2          | NM_003595    | 132.4890624 | 1.545825693 | 7.35E-14    | 85.7076338  |
| ATXN2          | NM_002973    | 70.16216501 | 1.477609789 | 9.15E-07    | 47.48355454 |
| MCAM           | NM_006500    | 40.53024548 | 2.905749467 | 0.002098821 | 13.94829318 |
| BMPR2          | NM_001204    | 43.91763382 | 0.447901919 | 6.03E-05    | 98.05189911 |
| TNKS           | NM_003747    | 61.06049096 | 0.66884687  | 1.03E-06    | 91.29218316 |
| ERCC6L2        | NM_001010895 | 98.73359358 | 0.442976871 | 1.68E-12    | 222.8865662 |
| MTBP           | NM_022045    | 99.5289618  | 0.26676835  | 1.26E-13    | 373.0913417 |
| RPP30          | NM_001104546 | 59.5289618  | 1.731226275 | 5.66E-06    | 34.38543109 |
| RALGAPB        | NM_020336    | 95.87645073 | 1.407266024 | 1.27E-09    | 68.12958539 |
| SNRPB          | NM_198216    | 174.8159598 | 6.028704109 | 2.81E-17    | 28.99726983 |
| PARVA          | NM_018222    | 138.4684708 | 1.606395216 | 1.51E-13    | 86.19825899 |
| ARMCX5-GPRASP2 | NM_001199818 | 49.36679679 | 0.3104963   | 6.48E-06    | 158.9931886 |
| IFRD2          | NM_006764    | 46.24453119 | 5.526436172 | 0.001922204 | 8.367875745 |
| RMND5B         | NM_022762    | 173.2844306 | 5.869780859 | 9.95E-17    | 29.52144803 |
| C17orf97       | NM_001013672 | 47.03989941 | 3.670520888 | 0.000262672 | 12.81559235 |
| MECR           | NM_016011    | 123.9176338 | 2.627291959 | 7.55E-13    | 47.16553613 |
| PTMA           | NM_002823    | 166.2445312 | 34.98170718 | 8.26E-08    | 4.752327561 |
| BCL2L1         | NM_001191    | 77.93822536 | 4.96160203  | 1.97E-06    | 15.70827827 |
| DPP7           | NM_013379    | 103.3873883 | 5.449263672 | 3.14E-09    | 18.97272633 |
| C9orf41        | NM_152420    | 124.713002  | 1.434892312 | 8.63E-14    | 86.91453774 |
| ZBTB39         | NM_014830    | 89.36679679 | 1.282504311 | 5.04E-11    | 69.68147867 |
| AGAP11         | NM_133447    | 80.53024548 | 3.305674202 | 7.67E-08    | 24.36121667 |
| BLOC1S5        | NM_001199322 | 80.53024548 | 0.250558007 | 2.08E-11    | 321.4035996 |
| TMEM151A       | NM_153266    | 58.2033481  | 1.633616912 | 1.66E-06    | 35.62851711 |
| PMPCA          | NM_015160    | 144.713002  | 5.327536275 | 4.31E-14    | 27.16321289 |
| UNC13A         | NM_001080421 | 44.18275656 | 2.235931721 | 0.000657365 | 19.76033353 |
| TNS3           | NM_022748    | 58.2033481  | 0.22402438  | 1.18E-06    | 259.8080983 |
| SMG8           | NM_018149    | 150.6924105 | 9.161654524 | 3.16E-13    | 16.44816557 |
| SLC25A28       | NM_031212    | 41.06049096 | 2.705227763 | 0.000469199 | 15.17820108 |
| STKLD1         | NR_103997    | 74.28571429 | 4.346760977 | 2.12E-06    | 17.08990089 |
| GSTM4          | NM_000850    | 38.99871632 | 2.870789651 | 0.00131376  | 13.58466522 |
| NDUFB9         | NM_005005    | 229.8970423 | 4.619077715 | 9.25E-25    | 49.77120033 |
| NSD1           | NM_022455    | 66.24453119 | 1.270260147 | 2.96E-07    | 52.15036568 |
| DEXI           | NM_014015    | 98.2033481  | 1.745263222 | 9.44E-12    | 56.26850257 |
| CDX2           | NM_001265    | 167.0398994 | 7.309397198 | 1.77E-15    | 22.85275993 |
| ZNHIT6         | NM_017953    | 91.95881691 | 0.891588002 | 4.46E-11    | 103.1404827 |
| NIN            | NM_182946    | 65.97940845 | 0.998403878 | 1.81E-07    | 66.08488802 |
| GGH            | NM_003878    | 89.89704227 | 2.018741194 | 1.41E-09    | 44.53123685 |
| RBMS2          | NM_002898    | 28.57142857 | 1.153643064 | 0.002325575 | 24.76626389 |
| DNAJB12        | NM_017626    | 91.95881691 | 4.987423687 | 3.01E-08    | 18.43814015 |
| LGALS8         | NM_006499    | 43.91763382 | 5.414588749 | 0.002798059 | 8.110982357 |
| LNX2           | NM_153371    | 121.3256137 | 0.578966882 | 4.20E-15    | 209.5553606 |
| HLTF           | NM_003071    | 110.4272878 | 0.807196489 | 1.44E-12    | 136.8034788 |
| INTS10         | NM_018142    | 212.7541851 | 2.238754086 | 4.87E-23    | 95.03240505 |
| EVA1C          | NM_001286556 | 85.97940845 | 2.517864984 | 3.48E-08    | 34.14774382 |
| GTF3C3         | NM_012086    | 119.2638391 | 1.588520496 | 2.92E-13    | 75.07856485 |
| GFPT1          | NM_002056    | 112.2239396 | 0.471940429 | 1.75E-14    | 237.7925958 |
| OLFML2A        | NM_182487    | 49.63191953 | 0.758330263 | 4.55E-06    | 65.44895012 |
| ALDH16A1       | NM_153329    | 186.7747767 | 3.436549601 | 1.82E-20    | 54.34950702 |
| SLC26A11       | NM_001166348 | 46.50965393 | 1.200847248 | 0.000147554 | 38.73069953 |
| UTP20          | NM_014503    | 35.87645073 | 0.145522539 | 6.81E-05    | 246.5353543 |
| PSPC1          | NR_003272    | 102.1209819 | 1.304329113 | 2.79E-10    | 78.29387609 |
| KLHL24         | NM_017644    | 78.46847084 | 1.650871449 | 8.78E-08    | 47.53154516 |
| ENGASE         | NM_001042573 | 104.4478793 | 1.389302078 | 2.43E-13    | 75.18010728 |
| WDR82          | NM_025222    | 97.40797988 | 3.299639674 | 3.95E-09    | 29.52079302 |
| GLI4           | NM_138465    | 147.5701449 | 26.93952687 | 8.39E-08    | 5.477829867 |

|              |              |             |             |             |             |
|--------------|--------------|-------------|-------------|-------------|-------------|
| LOC100419583 | NR_125376    | 62.6512274  | 12.0136153  | 0.001707403 | 5.215018613 |
| MST1R        | NM_002447    | 191.6936942 | 10.13581691 | 5.54E-16    | 18.91250561 |
| GTF2H1       | NM_001142307 | 58.46847084 | 0.158896271 | 1.43E-08    | 367.9662874 |
| NFYB         | NM_006166    | 49.10167405 | 1.371068969 | 4.95E-05    | 35.81269445 |
| RNF20        | NM_019592    | 95.87645073 | 0.553070453 | 2.18E-12    | 173.3530514 |
| UQCR10       | NM_013387    | 89.63191953 | 5.429046748 | 7.46E-08    | 16.5096975  |
| CCDC138      | NM_144978    | 97.93822536 | 0.900387962 | 2.52E-11    | 108.7733616 |
| GOLPH3L      | NM_018178    | 23.91763382 | 0.139463455 | 0.003313529 | 171.4974991 |
| MEF2BNB      | NM_001145784 | 78.99871632 | 7.576481078 | 2.85E-06    | 10.42683477 |
| PKIA         | NM_181839    | 38.46847084 | 0.584209678 | 0.000207328 | 65.84702769 |
| UBR3         | NM_172070    | 96.40669621 | 0.31962805  | 2.66E-11    | 301.6215132 |
| SAMD3        | NM_001258275 | 27.03989941 | 0.465777542 | 0.00490775  | 58.05324861 |
| PCCB         | NM_000532    | 107.5701449 | 0.783411578 | 5.00E-13    | 137.3098738 |
| TMEM209      | NM_032842    | 98.99871632 | 0.790545861 | 1.32E-11    | 125.2283027 |
| USP12-AS2    | NR_046548    | 69.10167405 | 0.813068466 | 6.65E-09    | 84.98875175 |
| ESCO1        | NM_052911    | 113.0193079 | 0.464314317 | 8.05E-15    | 243.411206  |
| RIN1         | NM_004292    | 116.1415735 | 7.418459936 | 1.01E-09    | 15.6557526  |
| TRIM52       | NM_032765    | 109.1016741 | 10.60474166 | 4.23E-08    | 10.28800866 |
| LOC100289361 | NR_034032    | 97.67310262 | 5.987358974 | 0.000162833 | 16.31321974 |
| THEM6        | NM_016647    | 181.5907364 | 17.31681121 | 5.36E-13    | 10.48638425 |
| ERMARD       | NM_001278533 | 91.75290145 | 1.320130526 | 3.47E-10    | 69.50290114 |
| GABARAPL2    | NM_007285    | 72.22393965 | 3.75939851  | 1.08E-06    | 19.21156787 |
| SEMA4C       | NM_017789    | 81.3256137  | 12.94830498 | 4.64E-05    | 6.280792258 |
| PRELID1      | NM_001271828 | 154.8159598 | 16.93550833 | 2.89E-10    | 9.14150061  |
| ZNF581       | NM_016535    | 55.08108251 | 11.07214279 | 0.004439934 | 4.974744593 |
| GALT         | NM_001258332 | 108.1003904 | 13.47805264 | 6.51E-07    | 8.020475455 |
| OSGEPL1      | NM_022353    | 77.67310262 | 3.524988781 | 4.00E-07    | 22.03499286 |
| ETAA1        | NM_019002    | 75.08108251 | 2.185870684 | 2.48E-08    | 34.34836427 |
| LAMTOR4      | NM_001008395 | 117.9382254 | 10.57725901 | 6.67E-09    | 11.15016899 |
| TMEM189      | NM_001162505 | 112.2239396 | 6.683608586 | 3.69E-09    | 16.79092038 |
| PLOD3        | NM_001084    | 82.85714286 | 4.023732403 | 5.67E-08    | 20.59211065 |
| UHRF2        | NR_046386    | 106.5096539 | 0.315759703 | 8.47E-14    | 337.3123709 |
| ARHGAP44     | NM_014859    | 106.2445312 | 0.114462831 | 2.70E-14    | 928.2011495 |
| ZCCHC9       | NM_001131035 | 151.6936942 | 1.050879308 | 2.45E-20    | 144.3493015 |
| GATB         | NM_004564    | 53.01930787 | 1.141877144 | 3.48E-06    | 46.43170954 |
| 3-Mar        | NM_178450    | 146.7747767 | 1.020923733 | 3.38E-16    | 143.7666418 |
| PHIP         | NM_017934    | 92.22393965 | 0.197242496 | 6.62E-12    | 467.5662768 |
| PTS          | NM_000317    | 170.162165  | 6.579032083 | 2.34E-16    | 25.86431604 |
| PAXIP1-AS1   | NR_028090    | 132.4890624 | 15.15525847 | 1.36E-08    | 8.7421183   |
| CSEIL        | NM_001256135 | 149.8970423 | 2.604937638 | 1.84E-15    | 57.54342832 |
| EMD          | NM_000117    | 63.38738834 | 12.09502646 | 0.002207008 | 5.240781287 |
| ZC3H8        | NM_032494    | 151.9588169 | 1.257860578 | 1.14E-17    | 120.807361  |
| DOCK1        | NM_001290223 | 106.5096539 | 0.165860287 | 4.78E-12    | 642.1648976 |
| LOC101929340 | NR_120579    | 83.91763382 | 12.22643375 | 5.13E-05    | 6.863623156 |
| RHOV         | NM_133639    | 161.060491  | 22.45400517 | 8.09E-09    | 7.172907004 |
| CEP104       | NM_014704    | 81.06049096 | 0.831947434 | 8.94E-09    | 97.43463066 |
| LOC101929234 | NR_110304    | 118.4684708 | 13.17525595 | 9.26E-08    | 8.991739616 |
| TMEM167B     | NM_020141    | 49.89704227 | 2.926736505 | 0.00013848  | 17.04869645 |
| SPIDR        | NM_001282916 | 146.2445312 | 0.478930044 | 7.14E-16    | 305.35677   |
| NDUFA7       | NM_005001    | 116.4066962 | 4.626453756 | 2.43E-11    | 25.16110661 |
| RBM4B        | NM_001286135 | 103.9176338 | 7.673890971 | 4.92E-08    | 13.54171361 |
| HDAC7        | NM_015401    | 43.1222656  | 4.531005178 | 0.002832561 | 9.517152134 |
| PLD1         | NM_002662    | 95.87645073 | 0.328650153 | 1.78E-11    | 291.7279963 |
| APEX2        | NM_001271748 | 83.38738834 | 5.066543573 | 2.12E-07    | 16.45843702 |
| FASTKD5      | NM_021826    | 121.3256137 | 3.565410355 | 1.53E-12    | 34.02851331 |
| MAST1        | NM_014975    | 57.93822536 | 2.898973679 | 1.80E-05    | 19.98577144 |
| CYP4F22      | NM_173483    | 38.46847084 | 0.38909712  | 7.93E-05    | 98.86598719 |
| ACLY         | NM_001096    | 137.9382254 | 2.689259128 | 4.29E-14    | 51.29227746 |
| ZNHIT1       | NM_006349    | 72.22393965 | 4.816457897 | 3.09E-06    | 14.99523949 |
| PLSCR1       | NM_021105    | 106.2445312 | 2.817123136 | 4.63E-11    | 37.71383999 |
| PNPLA6       | NM_001166112 | 75.08108251 | 3.427826448 | 1.64E-06    | 21.90340837 |
| KLHDC10      | NM_014997    | 35.08108251 | 0.428294552 | 0.000302387 | 81.90877587 |
| ADAMTSL5     | NM_213604    | 110.162165  | 14.01999318 | 1.50E-07    | 7.857504894 |
| KDM4A-AS1    | NR_033827    | 127.3050222 | 7.232004807 | 1.20E-11    | 17.60300574 |

|           |              |             |             |             |             |
|-----------|--------------|-------------|-------------|-------------|-------------|
| PAGR1     | NM_024516    | 122.3861047 | 28.04934401 | 1.65E-05    | 4.363243027 |
| SGTB      | NM_019072    | 152.4890624 | 1.824678091 | 3.55E-16    | 83.57039148 |
| PRPF38B   | NM_018061    | 170.9575332 | 3.798490105 | 4.52E-19    | 45.00670754 |
| MGEA5     | NM_001142434 | 157.4671872 | 4.396630047 | 3.72E-15    | 35.81542806 |
| EXOSC4    | NM_019037    | 148.1003904 | 12.42034967 | 7.97E-11    | 11.92401135 |
| RNPEP     | NM_020216    | 149.3667968 | 5.034162941 | 1.43E-13    | 29.67063215 |
| LINC00346 | NR_027701    | 48.10039037 | 3.948494603 | 0.000222026 | 12.18195672 |
| H2AFZ     | NM_002106    | 140.2651227 | 15.9616956  | 5.32E-09    | 8.787607926 |
| PRMT3     | NM_001145166 | 93.01930787 | 0.714490708 | 6.59E-11    | 130.1896677 |
| SETDB2    | NM_031915    | 111.222656  | 0.608096326 | 1.53E-14    | 182.9030223 |
| HNRNPA1   | NM_002136    | 121.5907364 | 22.35389766 | 2.85E-06    | 5.439352828 |
| APOL2     | NM_145637    | 55.34620525 | 0.785317352 | 1.61E-06    | 70.47622865 |
| ASRGL1    | NM_001083926 | 69.63191953 | 0.389849418 | 5.36E-09    | 178.6123469 |
| FBXW4     | NM_022039    | 118.4684708 | 1.830454656 | 8.84E-12    | 64.7207897  |
| SMURF1    | NM_001199847 | 77.14285714 | 1.409048552 | 1.93E-07    | 54.7481895  |
| F2R       | NM_001992    | 75.08108251 | 0.995644236 | 8.64E-09    | 75.40954874 |
| PRR12     | NM_020719    | 43.38738834 | 6.004980237 | 0.002950919 | 7.22523416  |
| ATG4B     | NM_178326    | 34.07979883 | 3.037209227 | 0.004012704 | 11.22076099 |
| MBNL2     | NM_144778    | 55.61132799 | 1.462854922 | 5.18E-05    | 38.01561395 |
| APELH     | NM_001640    | 155.3462052 | 13.67148421 | 4.25E-11    | 11.36279009 |
| TIGD4     | NM_145720    | 92.48906239 | 0.531363883 | 1.69E-13    | 174.0597458 |
| DENND5A   | NM_001243254 | 43.1222656  | 0.949689313 | 6.95E-05    | 45.40670828 |
| HAS2-AS1  | NR_002835    | 83.91763382 | 10.46555772 | 9.97E-06    | 8.018457887 |
| HTT       | NM_002111    | 60.26512274 | 0.852829981 | 1.00E-06    | 70.66487356 |
| PPP3CC    | NM_001243975 | 138.4684708 | 0.491954918 | 3.74E-17    | 281.465772  |
| EMC6      | NM_001014764 | 89.63191953 | 10.18185805 | 9.64E-05    | 8.803100481 |
| ZFYVE21   | NM_024071    | 109.3667968 | 4.269722402 | 1.69E-10    | 25.61449821 |
| BCAR3     | NM_001261408 | 40.79536822 | 1.937506416 | 0.001410898 | 21.05560419 |
| C1orf52   | NR_024113    | 121.5907364 | 1.447201655 | 1.83E-15    | 84.01782574 |
| TCHP      | NM_032300    | 70.42728775 | 0.802723926 | 9.10E-09    | 87.73537879 |
| C16orf71  | NM_139170    | 63.91763382 | 4.83869427  | 2.02E-05    | 13.20968638 |
| TMEM115   | NM_007024    | 86.24453119 | 3.699373655 | 8.08E-09    | 23.31327928 |
| EIF4A1    | NM_001204510 | 103.6525111 | 19.54309556 | 1.09E-05    | 5.303791857 |
| STK3      | NM_001256313 | 155.3462052 | 0.218598209 | 2.51E-18    | 710.6472009 |
| RPUSD2    | NM_152260    | 95.34620525 | 7.346556475 | 4.81E-08    | 12.97835327 |
| ZNF706    | NM_016096    | 147.0398994 | 4.277832268 | 1.75E-15    | 34.37252566 |
| RNF168    | NM_152617    | 126.5096539 | 1.140376076 | 1.15E-14    | 110.9367836 |
| ZMAT3     | NM_152240    | 120.7953682 | 0.412497967 | 1.62E-16    | 292.8386993 |
| CCZ1      | NM_015622    | 138.4684708 | 1.986882598 | 1.43E-15    | 69.69131996 |
| GSG2      | NM_031965    | 61.59073644 | 2.867719681 | 6.64E-06    | 21.47725136 |
| SH3D21    | NM_001162530 | 75.08108251 | 7.857648073 | 1.03E-05    | 9.555159738 |
| POLR2L    | NM_021128    | 137.6731026 | 26.55430736 | 1.19E-06    | 5.184586469 |
| PGRMC1    | NM_001282621 | 66.24453119 | 3.774435586 | 2.79E-06    | 17.55084427 |
| SCYL3     | NM_020423    | 96.40669621 | 2.33324292  | 6.11E-10    | 41.31875657 |
| NSDHL     | NM_015922    | 43.65251108 | 0.464971451 | 1.42E-05    | 93.88213186 |
| RPS2      | NM_002952    | 227.5701449 | 38.4226038  | 2.86E-11    | 5.922819445 |
| POMT2     | NM_013382    | 143.6525111 | 1.085818115 | 1.74E-16    | 132.2988713 |
| RAP1A     | NM_001291896 | 29.63191953 | 0.225882035 | 0.001323281 | 131.1831618 |
| ZNF691    | NM_015911    | 69.89704227 | 2.753201842 | 2.44E-07    | 25.3875474  |
| ERGIC2    | NM_016570    | 41.3256137  | 0.597924237 | 4.91E-05    | 69.11513392 |
| EMP1      | NM_001423    | 46.24453119 | 2.434563379 | 0.000176498 | 18.99499992 |
| MMAB      | NM_052845    | 86.77477667 | 2.822689864 | 4.40E-09    | 30.74187418 |
| RSAD1     | NM_018346    | 188.6306359 | 11.71592543 | 1.34E-15    | 16.1003616  |
| SERPINH1  | NM_001235    | 109.6319195 | 14.12409021 | 4.41E-07    | 7.762051776 |
| NUP153    | NM_001278210 | 114.550837  | 1.849133205 | 2.13E-11    | 61.94839654 |
| SSR2      | NM_003145    | 65.71428571 | 4.828688335 | 7.45E-06    | 13.60913796 |
| RRP1      | NM_003683    | 95.61132799 | 3.784164843 | 3.56E-09    | 25.26616359 |
| ZNF638    | NM_001252613 | 107.0398994 | 1.661681978 | 1.82E-10    | 64.41659767 |
| SLC25A13  | NR_027662    | 106.7747767 | 1.426674772 | 3.32E-10    | 74.84170797 |
| RDH10     | NM_172037    | 130.6924105 | 1.886044384 | 9.90E-15    | 69.29445117 |
| RGS16     | NM_002928    | 166.7747767 | 6.435454237 | 1.18E-15    | 25.91499691 |
| TTLL1     | NM_012263    | 87.83526763 | 1.36973966  | 3.14E-09    | 64.12551977 |
| ZNF22     | NM_006963    | 51.95881691 | 8.666350971 | 0.002245212 | 5.995466498 |
| WBP2      | NM_012478    | 41.3256137  | 5.181641877 | 0.00341678  | 7.975389786 |

|           |              |             |             |             |             |
|-----------|--------------|-------------|-------------|-------------|-------------|
| KLC1      | NM_005552    | 144.4478793 | 2.653057722 | 5.90E-15    | 54.44581099 |
| ZNF214    | NM_013249    | 41.85585918 | 1.230990474 | 0.000213744 | 34.00177342 |
| EIF1AD    | NM_001242484 | 198.4684708 | 5.717616372 | 2.18E-20    | 34.71175013 |
| AGPAT4    | NM_020133    | 63.65251108 | 0.727384538 | 3.82E-07    | 87.50874918 |
| CORO1A    | NM_007074    | 51.95881691 | 8.630249946 | 0.002731446 | 6.020546014 |
| ANXA9     | NM_003568    | 27.57014489 | 0.742645027 | 0.004960312 | 37.12425708 |
| ZSWIM4    | NM_023072    | 52.22393965 | 4.001143266 | 0.000437326 | 13.05225436 |
| TMEM245   | NM_032012    | 131.6936942 | 1.50313824  | 2.48E-13    | 87.61249678 |
| UBXN8     | NM_001282189 | 43.38738834 | 1.20677255  | 0.000222328 | 35.95324431 |
| PEX11G    | NM_001270539 | 141.5907364 | 5.846217445 | 9.55E-14    | 24.2192046  |
| DGCR14    | NM_022719    | 78.73359358 | 1.788065152 | 3.10E-09    | 44.03284383 |
| INCENP    | NM_020238    | 40.79536822 | 0.621402569 | 3.49E-05    | 65.65046598 |
| NIPA1     | NM_144599    | 63.38738834 | 1.911512586 | 3.56E-06    | 33.16085324 |
| ACAD10    | NM_001136538 | 133.5495533 | 0.984214056 | 1.00E-14    | 135.6915729 |
| KCTD6     | NM_001128214 | 46.50965393 | 0.827847309 | 1.55E-05    | 56.18144004 |
| CLN6      | NM_017882    | 132.7541851 | 2.990952868 | 2.28E-13    | 44.38524811 |
| ARRDC4    | NM_183376    | 72.75418513 | 4.355911497 | 1.73E-06    | 16.70240205 |
| TLDC1     | NM_020947    | 90.95753323 | 3.845822972 | 2.93E-08    | 23.65099327 |
| NSL1      | NM_001297737 | 158.2033481 | 0.919570157 | 6.14E-18    | 172.0405419 |
| MFS11     | NM_001242534 | 89.89704227 | 5.732303513 | 1.36E-07    | 15.68253357 |
| ZNF644    | NM_032186    | 118.7335936 | 1.559200552 | 4.96E-12    | 76.15030245 |
| TTI1      | NM_014657    | 69.36679679 | 0.939700505 | 2.85E-08    | 73.81798393 |
| KANSL2    | NM_017822    | 189.6319195 | 2.085270725 | 7.99E-21    | 90.93875304 |
| SLC35B1   | NM_005827    | 132.4890624 | 0.753771723 | 4.49E-18    | 175.7681514 |
| CNOT3     | NM_014516    | 41.59073644 | 4.286835735 | 0.002224885 | 9.701966441 |
| PPIEL     | NR_003929    | 89.10167405 | 1.322179415 | 1.49E-09    | 67.3900025  |
| P2RY1     | NM_002563    | 107.0398994 | 3.683842723 | 6.24E-11    | 29.05658777 |
| TRNP1     | NM_001013642 | 197.1428571 | 27.95293357 | 2.60E-11    | 7.052671471 |
| PPFIA1    | NM_003626    | 105.9794085 | 1.825885845 | 2.34E-10    | 58.04273511 |
| GRPEL2    | NM_152407    | 115.8764507 | 6.37467045  | 3.51E-10    | 18.17763783 |
| ZNF579    | NM_152600    | 51.95881691 | 5.827219487 | 0.001052342 | 8.916571106 |
| STK39     | NM_013233    | 54.28571429 | 2.375898027 | 6.20E-05    | 22.84850346 |
| TMEM167A  | NM_174909    | 102.3861047 | 2.01002564  | 2.39E-11    | 50.93771077 |
| CSNK1G1   | NM_022048    | 33.01930787 | 0.745901626 | 0.000623721 | 44.26764433 |
| CHD4      | NM_001273    | 121.060491  | 4.61621037  | 5.38E-11    | 26.22508102 |
| SYAP1     | NM_032796    | 126.5096539 | 0.736403358 | 3.93E-15    | 171.7939667 |
| PPP1R14C  | NM_030949    | 89.10167405 | 0.391233961 | 5.82E-11    | 227.7452442 |
| TRMT44    | NM_152544    | 73.54955335 | 0.490427636 | 3.78E-10    | 149.9702462 |
| DYNLL2    | NM_080677    | 114.550837  | 6.881464401 | 3.49E-10    | 16.64628782 |
| TNRC6A    | NM_014494    | 63.38738834 | 1.708883364 | 5.95E-06    | 37.09286993 |
| MTMR9     | NM_015458    | 186.2445312 | 0.93865996  | 6.97E-23    | 198.4153359 |
| ZNF721    | NM_133474    | 101.3256137 | 2.367369696 | 5.60E-10    | 42.80092538 |
| SLC27A2   | NM_003645    | 115.8764507 | 2.126954325 | 4.84E-12    | 54.47999018 |
| FAM151B   | NM_205548    | 47.30502215 | 0.196091394 | 9.12E-07    | 241.2396648 |
| TOB1      | NM_005749    | 210.162165  | 14.10940956 | 1.26E-16    | 14.89517787 |
| NXT2      | NM_001242617 | 95.34620525 | 0.441404139 | 1.29E-13    | 216.0065954 |
| ZMYM6     | NM_007167    | 64.71300204 | 1.614840065 | 1.53E-06    | 40.07393885 |
| FAM228B   | NR_111929    | 52.22393965 | 3.609568302 | 0.000105739 | 14.46819544 |
| HAUS4     | NM_001166270 | 217.9382254 | 1.710559414 | 3.02E-28    | 127.4075741 |
| TRAPPC8   | NM_014939    | 75.87645073 | 0.02720567  | 4.99E-13    | 2788.994036 |
| FKBP14    | NM_017946    | 35.61132799 | 2.18071588  | 0.002619399 | 16.33010898 |
| RNF219    | NM_024546    | 51.69369417 | 1.257036215 | 4.63E-05    | 41.12347245 |
| SUGT1     | NM_006704    | 78.46847084 | 1.751095268 | 5.88E-08    | 44.81108041 |
| WDR53     | NM_182627    | 81.3256137  | 4.594314399 | 2.37E-07    | 17.70136013 |
| EXOC5     | NM_006544    | 146.5096539 | 0.274483053 | 5.91E-21    | 533.7657539 |
| C2CD2     | NM_015500    | 57.67310262 | 0.535753931 | 5.37E-07    | 107.6484917 |
| UHRF1BP1L | NM_015054    | 141.3256137 | 0.108097172 | 2.17E-21    | 1307.394181 |
| EXOC4     | NM_021807    | 77.67310262 | 0.077619173 | 4.18E-09    | 1000.694802 |
| LRRC23    | NM_201650    | 30.16216501 | 2.892883589 | 0.004645456 | 10.4263321  |
| PTGFRN    | NM_020440    | 80.79536822 | 1.685134831 | 8.04E-08    | 47.94593687 |
| SMPDL3B   | NM_001009568 | 62.12098192 | 0.622473072 | 1.34E-07    | 99.79705903 |
| RNF31     | NM_017999    | 107.0398994 | 2.322137053 | 1.92E-11    | 46.09542717 |
| ZNF776    | NM_173632    | 49.36679679 | 2.06605588  | 3.64E-05    | 23.89422148 |
| HTR7P1    | NR_002774    | 166.2445312 | 5.805391611 | 1.02E-16    | 28.6362303  |

|           |              |             |             |             |             |
|-----------|--------------|-------------|-------------|-------------|-------------|
| ATP2C2    | NM_001286527 | 162.1209819 | 1.91502676  | 1.24E-16    | 84.65729319 |
| UBOX5     | NM_199415    | 121.3256137 | 1.429321271 | 6.73E-13    | 84.88337518 |
| TAPT1-AS1 | NR_027697    | 40.26512274 | 2.205310346 | 0.000914767 | 18.25825685 |
| FANCC     | NM_001243744 | 75.34620525 | 0.741714533 | 2.81E-08    | 101.5838329 |
| RAB17     | NR_033308    | 109.3667968 | 3.147751223 | 5.84E-11    | 34.74442199 |
| ZNF473    | NM_015428    | 38.2033481  | 2.052442928 | 0.001495598 | 18.61359826 |
| SEC24B    | NM_001300813 | 114.8159598 | 0.797404636 | 2.52E-13    | 143.9870732 |
| CHMP3     | NR_036454    | 86.77477667 | 0.395787857 | 2.50E-11    | 219.2456772 |
| PURA      | NM_005859    | 40.26512274 | 2.004970916 | 0.000805004 | 20.08264679 |
| ACTN4     | NM_004924    | 209.1016741 | 6.040752042 | 3.30E-19    | 34.61517251 |
| SNRNP25   | NM_024571    | 106.7747767 | 5.81870137  | 1.31E-09    | 18.3502761  |
| GPR37     | NM_005302    | 49.63191953 | 0.431425664 | 6.04E-07    | 115.0416483 |
| TCP11L1   | NM_018393    | 61.3256137  | 2.447813847 | 7.40E-06    | 25.0532179  |
| TMA16     | NM_018352    | 169.6319195 | 1.530566261 | 1.29E-20    | 110.829517  |
| ANKZF1    | NM_001282792 | 92.48906239 | 3.024942078 | 2.84E-09    | 30.57548211 |
| ALS2CL    | NM_001190707 | 126.2445312 | 2.061893275 | 3.07E-14    | 61.22748093 |
| EXOC6B    | NM_015189    | 167.8352676 | 0.195633531 | 3.13E-19    | 857.9064496 |
| NENF      | NR_026598    | 106.2445312 | 3.958311497 | 1.31E-10    | 26.84087174 |
| ZNF23     | NM_145911    | 118.4684708 | 0.399850158 | 1.55E-17    | 296.2821658 |
| KIAA1324L | NM_001291991 | 60.53024548 | 0.178724965 | 1.50E-07    | 338.6781781 |
| OTUD3     | NM_015207    | 122.3861047 | 2.250154343 | 2.27E-13    | 54.39009331 |
| SMARCD2   | NM_001098426 | 84.71300204 | 15.96743176 | 5.57E-05    | 5.305361771 |
| RINT1     | NM_021930    | 129.3667968 | 1.594753682 | 2.12E-14    | 81.12023708 |
| PSMA4     | NM_001102668 | 141.5907364 | 2.31593919  | 1.40E-16    | 61.13750181 |
| ZP3       | NM_007155    | 30.16216501 | 1.003399022 | 0.000885111 | 30.05999046 |
| CIAO1     | NM_004804    | 82.12098192 | 6.603106423 | 4.25E-07    | 12.43671943 |
| BPHL      | NR_026650    | 154.8159598 | 1.384696754 | 3.77E-18    | 111.8049561 |
| TULP3     | NM_001160408 | 149.3667968 | 2.712493548 | 2.07E-15    | 55.06623117 |
| RSRC2     | NR_036434    | 146.7747767 | 2.563181313 | 1.93E-15    | 57.26273671 |
| TMCO1     | NM_001256165 | 75.61132799 | 0.541708688 | 1.05E-09    | 139.5793156 |
| IFIH1     | NM_022168    | 69.36679679 | 0.875768478 | 2.64E-08    | 79.20677498 |
| REEP5     | NM_005669    | 115.0810825 | 1.841549896 | 4.71E-12    | 62.49142788 |
| ARAP2     | NM_015230    | 51.69369417 | 0.44571343  | 6.08E-06    | 115.9796648 |
| SND1      | NM_014390    | 224.1827566 | 2.09748859  | 2.35E-21    | 106.8815142 |
| STOML2    | NM_001287033 | 144.1827566 | 8.6831966   | 6.49E-12    | 16.60480157 |
| MYLIP     | NM_013262    | 273.0193079 | 3.489541812 | 7.51E-31    | 78.23929976 |
| IMMT      | NM_001100169 | 64.18275656 | 2.900179807 | 5.63E-06    | 22.13061286 |
| NCOA5     | NM_020967    | 164.713002  | 3.594361984 | 1.03E-16    | 45.82537951 |
| COQ4      | NM_016035    | 123.9176338 | 5.023844987 | 1.15E-11    | 24.66589517 |
| SLC37A2   | NM_001145290 | 66.24453119 | 1.28521292  | 5.09E-07    | 51.54362374 |
| NHSL1     | NM_020464    | 26.50965393 | 0.544374234 | 0.004721553 | 48.69748107 |
| TRAM1     | NM_014294    | 145.2432475 | 2.487670499 | 9.37E-16    | 58.38524337 |
| LPAR1     | NM_001401    | 43.91763382 | 0.436129192 | 5.49E-05    | 100.6986796 |
| ZNF770    | NM_014106    | 220         | 2.608648673 | 2.74E-26    | 84.33485209 |
| ETS1      | NM_005238    | 95.34620525 | 1.133089687 | 7.41E-10    | 84.14709471 |
| MMP15     | NM_002428    | 38.73359358 | 5.491413923 | 0.00473099  | 7.053482788 |
| MGC72080  | NR_002822    | 117.6731026 | 4.803478857 | 1.73E-11    | 24.49747488 |
| SNHG15    | NR_003697    | 182.3861047 | 20.0555924  | 3.31E-12    | 9.094027294 |
| DNAJC9    | NM_015190    | 178.9987163 | 10.86430601 | 2.52E-15    | 16.4758537  |
| YWHAB     | NM_139323    | 96.14157347 | 5.269286952 | 8.21E-09    | 18.24565152 |
| CEP192    | NM_032142    | 163.3873883 | 1.050811897 | 5.34E-17    | 155.4868087 |
| TOMM6     | NM_001134493 | 78.99871632 | 11.29578447 | 3.93E-05    | 6.99364586  |
| TEX30     | NM_001286775 | 233.5495533 | 5.186466669 | 2.07E-25    | 45.03057057 |
| TSNAX     | NM_005999    | 99.26383906 | 1.153667756 | 3.65E-11    | 86.04196361 |
| GNPAT     | NM_014236    | 200.2651227 | 2.062521834 | 6.77E-23    | 97.09721342 |
| MRPS22    | NM_020191    | 101.8558592 | 7.917961908 | 5.28E-08    | 12.86389861 |
| PLEKHF1   | NM_024310    | 82.38610466 | 2.242466046 | 7.99E-09    | 36.73906447 |
| HIST2H2BA | NR_027337    | 31.95881691 | 2.840359707 | 0.004328186 | 11.25167944 |
| IRGQ      | NM_001007561 | 81.59073644 | 4.503014036 | 7.37E-08    | 18.11913882 |
| RPN1      | NM_002950    | 115.3462052 | 1.196228638 | 2.77E-13    | 96.42488198 |
| ZNF483    | NM_001007169 | 47.30502215 | 0.023132778 | 1.10E-08    | 2044.934753 |
| COG8      | NM_032382    | 100.7953682 | 21.40570054 | 3.55E-05    | 4.7088096   |
| DPH7      | NM_138778    | 114.875167  | 1.941081469 | 6.61E-13    | 59.1810127  |
| GLCE      | NM_015554    | 139.7940845 | 0.166764253 | 6.38E-20    | 838.2736831 |

|              |              |             |             |             |             |
|--------------|--------------|-------------|-------------|-------------|-------------|
| FAM175A      | NM_139076    | 131.6936942 | 3.184861349 | 3.60E-13    | 41.34989871 |
| MRPL4        | NM_146388    | 133.2844306 | 9.256770188 | 4.48E-11    | 14.39858913 |
| TFIP11       | NM_012143    | 50.16216501 | 4.077888111 | 0.000335935 | 12.30101554 |
| WDR41        | NM_018268    | 99.79408454 | 1.580946194 | 2.88E-10    | 63.12301134 |
| EBPL         | NR_103802    | 81.85585918 | 1.489525428 | 6.25E-09    | 54.95432146 |
| ACTA2        | NM_001141945 | 61.59073644 | 2.516126365 | 5.45E-06    | 24.47839556 |
| LOC100499484 | NR_036526    | 144.1827566 | 0.399354757 | 7.77E-20    | 361.0392865 |
| LOC100996325 | NR_103444    | 60          | 2.563421795 | 9.97E-06    | 23.40621435 |
| FAM86FP      | NR_024254    | 78.73359358 | 4.659175593 | 1.71E-07    | 16.8986105  |
| MCM10        | NM_018518    | 106.2445312 | 1.217142162 | 1.95E-11    | 87.29015762 |
| SAFB2        | NM_014649    | 75.08108251 | 4.488652041 | 2.68E-06    | 16.72686629 |
| ANKRD13A     | NM_033121    | 129.3667968 | 1.180613276 | 1.00E-14    | 109.5759293 |
| RRAGB        | NM_016656    | 35.08108251 | 0.055891681 | 1.11E-05    | 627.6619662 |
| SLC41A1      | NM_173854    | 83.91763382 | 3.35848754  | 1.56E-07    | 24.98673371 |
| LINC01311    | NR_103767    | 112.7541851 | 25.56115679 | 0.000364807 | 4.411153457 |
| ZDHHC3       | NM_001135179 | 81.59073644 | 2.558521455 | 4.57E-08    | 31.88979959 |
| ZNF273       | NM_021148    | 104.4478793 | 0.153059843 | 2.66E-16    | 682.39897   |
| NIPAL3       | NM_020448    | 35.61132799 | 0.314861684 | 0.000204298 | 113.1014974 |
| VIMP         | NM_018445    | 113.0193079 | 3.020470078 | 3.52E-12    | 37.41778762 |
| ABCA7        | NM_019112    | 110.4272878 | 9.485234114 | 2.44E-08    | 11.64202026 |
| DCAF13       | NM_015420    | 124.9781248 | 2.365920492 | 9.66E-14    | 52.82431307 |
| STX7         | NM_003569    | 93.01930787 | 0.531994205 | 2.99E-12    | 174.8502275 |
| ZFP91-CNTF   | NR_024091    | 51.95881691 | 0.857002977 | 3.13E-06    | 60.6285139  |
| MALSU1       | NM_138446    | 106.7747767 | 7.264308399 | 1.31E-08    | 14.69854676 |
| ORC2         | NR_033915    | 89.63191953 | 1.078087107 | 2.14E-09    | 83.139775   |
| UBA6         | NM_018227    | 112.2239396 | 0.453817736 | 4.03E-14    | 247.2885714 |
| LPAR2        | NM_004720    | 79.26383906 | 9.156174887 | 9.64E-06    | 8.656872552 |
| BATF2        | NM_138456    | 32.75418513 | 1.065010097 | 0.001919256 | 30.75481182 |
| BMI1         | NM_005180    | 40.53024548 | 5.756735511 | 0.003683626 | 7.040491161 |
| AKAP12       | NM_005100    | 44.4478793  | 3.473239296 | 0.000391345 | 12.7972407  |
| LAMA3        | NM_001127718 | 55.34620525 | 0.541897998 | 1.57E-06    | 102.133991  |
| DDHD2        | NM_001164232 | 33.81467609 | 1.733843168 | 0.003210937 | 19.50273054 |
| ATR          | NM_001184    | 93.28443061 | 0.785728067 | 8.96E-11    | 118.7235565 |
| HECTD3       | NM_024602    | 78.73359358 | 1.11503519  | 1.05E-10    | 70.61085988 |
| DNAJC2       | NM_001129887 | 117.9382254 | 2.831865645 | 2.72E-12    | 41.64682939 |
| LOC100507291 | NR_121608    | 98.46847084 | 1.144306603 | 2.39E-10    | 86.05077571 |
| MTF1         | NM_005955    | 56.67181894 | 0.903130097 | 7.14E-07    | 62.75044884 |
| SNAI3-AS1    | NR_024402    | 211.9588169 | 6.443808637 | 5.79E-21    | 32.8934065  |
| OGFRL1       | NM_024576    | 88.83655131 | 2.789885655 | 6.59E-09    | 31.84236284 |
| CCDC84       | NR_104051    | 109.3667968 | 7.532974265 | 3.93E-09    | 14.51840839 |
| AMZ2P1       | NR_026903    | 140.0592073 | 7.847483916 | 8.71E-12    | 17.84765777 |
| RBM28        | NM_001166135 | 184.4478793 | 1.207403346 | 5.74E-23    | 152.7640948 |
| DYNLL1-AS1   | NR_038854    | 38.46847084 | 1.806386603 | 0.000366321 | 21.29581275 |
| SEPSECS      | NM_016955    | 55.87645073 | 0.278053399 | 4.47E-08    | 200.9558267 |
| USP27X-AS1   | NR_026742    | 74.55083703 | 4.765658451 | 2.37E-06    | 15.64334452 |
| ANKRD40      | NM_052855    | 112.2239396 | 6.387783257 | 9.58E-10    | 17.56852653 |
| SLC25A23     | NM_024103    | 90.16216501 | 0.575472247 | 3.53E-12    | 156.6750881 |
| CRKL         | NM_005207    | 76.67181894 | 3.770040791 | 1.21E-06    | 20.33713246 |
| THNSL1       | NM_024838    | 135.0810825 | 5.656756904 | 2.87E-12    | 23.87959829 |
| POLA2        | NM_002689    | 135.8764507 | 2.867871917 | 1.68E-14    | 47.37884211 |
| RWDD2A       | NM_033411    | 120.7953682 | 12.30142773 | 1.35E-08    | 9.819621824 |
| SLC16A10     | NM_018593    | 67.03989941 | 0.887375088 | 2.04E-07    | 75.54854794 |
| BOLA3-AS1    | NR_045634    | 34.81595977 | 1.184683292 | 0.000375231 | 29.38841123 |
| DSP          | NM_001008844 | 160.2651227 | 2.564076658 | 5.54E-17    | 62.50402938 |
| ATPIF1       | NM_178190    | 136.1415735 | 14.60994463 | 4.51E-09    | 9.318418167 |
| WDFY1        | NM_020830    | 67.57014489 | 1.326951956 | 9.46E-07    | 50.92131979 |
| ITM2B        | NM_021999    | 214.550837  | 1.969987301 | 1.63E-24    | 108.9097564 |
| PVRL2        | NM_002856    | 83.65251108 | 3.676636763 | 2.72E-07    | 22.75245461 |
| TSNAXIP1     | NM_001288994 | 63.91763382 | 0.808958273 | 2.59E-07    | 79.01227538 |
| ZNF79        | NM_001286696 | 99.5289618  | 0.874265341 | 1.35E-12    | 113.8429687 |
| TMED4        | NM_182547    | 152.2239396 | 15.80144514 | 3.75E-10    | 9.633545432 |
| ITGB3        | NM_000212    | 43.65251108 | 0.584206589 | 3.07E-05    | 74.72101809 |
| CMC4         | NM_001018024 | 60          | 1.68315405  | 5.67E-07    | 35.64736097 |
| OPHN1        | NM_002547    | 52.22393965 | 0.190661341 | 5.84E-06    | 273.9094327 |

|              |              |             |             |             |             |
|--------------|--------------|-------------|-------------|-------------|-------------|
| TSPAN15      | NM_012339    | 110.162165  | 1.139001908 | 4.72E-12    | 96.71815671 |
| BIN3         | NM_018688    | 60.53024548 | 1.422343977 | 6.23E-06    | 42.55668563 |
| DLL4         | NM_019074    | 149.6319195 | 3.213123547 | 2.47E-16    | 46.56899037 |
| EID1         | NM_014335    | 110.162165  | 1.43993313  | 2.59E-12    | 76.50505619 |
| JAK1         | NM_002227    | 177.6731026 | 1.553153366 | 4.85E-18    | 114.3950794 |
| PTRF         | NM_012232    | 152.4890624 | 5.317380082 | 5.43E-14    | 28.67748027 |
| BDKRB2       | NM_000623    | 54.55083703 | 0.317295693 | 1.50E-07    | 171.9242907 |
| RPL21P28     | NR_026911    | 126.2445312 | 8.942390607 | 3.03E-10    | 14.1175371  |
| PARP2        | NM_001042618 | 269.8970423 | 3.26088938  | 8.12E-32    | 82.76792337 |
| TBPL1        | NM_001253676 | 66.24453119 | 2.162883736 | 1.60E-06    | 30.6278743  |
| ZNF767P      | NR_027788    | 115.611328  | 1.578442392 | 1.15E-11    | 73.24393248 |
| ST3GAL4-AS1  | NR_033839    | 97.67310262 | 5.978279463 | 2.73E-08    | 16.33799544 |
| FAM60A       | NM_001135811 | 132.7541851 | 3.167921127 | 2.03E-13    | 41.90577347 |
| BRWD1        | NM_001007246 | 100.7953682 | 2.293074491 | 2.65E-11    | 43.95642994 |
| DLG1-AS1     | NR_038289    | 87.03989941 | 17.47813749 | 0.000243129 | 4.979929895 |
| MKNK2        | NM_017572    | 111.6936942 | 11.7793166  | 6.72E-08    | 9.482187967 |
| TJAP1        | NM_001146016 | 126.2445312 | 4.11047798  | 6.06E-12    | 30.71285914 |
| PHACTR4      | NM_023923    | 30.69241049 | 0.874364619 | 0.000969121 | 35.10253026 |
| NIN1         | NM_004148    | 180.7953682 | 3.95426464  | 3.13E-19    | 45.72161569 |
| RFTN1        | NM_015150    | 26.50965393 | 0.254855166 | 0.00419737  | 104.0185071 |
| PDZD8        | NM_173791    | 165.2432475 | 1.43039573  | 2.01E-17    | 115.5227494 |
| ATG9A        | NM_024085    | 77.93822536 | 3.468488747 | 1.52E-07    | 22.47036997 |
| UNC50        | NM_014044    | 115.611328  | 6.681067863 | 1.06E-09    | 17.30431877 |
| PRPF39       | NM_017922    | 158.4684708 | 0.274325646 | 2.58E-23    | 577.6655337 |
| GCC1         | NM_024523    | 173.5495533 | 5.655701352 | 1.13E-17    | 30.68577044 |
| F2RL1        | NM_005242    | 196.1415735 | 6.817345681 | 2.63E-18    | 28.77095906 |
| TSPYL2       | NM_022117    | 92.48906239 | 2.021288528 | 5.50E-11    | 45.75747653 |
| THAP11       | NM_020457    | 68.83655131 | 6.218207684 | 3.78E-05    | 11.07015957 |
| TPRN         | NM_001128228 | 166.5096539 | 7.515773252 | 7.08E-15    | 22.15469365 |
| OPLAH        | NM_017570    | 153.2844306 | 2.485242956 | 7.24E-18    | 61.6778453  |
| HMG20B       | NM_006339    | 97.67310262 | 20.29372809 | 8.95E-05    | 4.812969909 |
| ALG2         | NM_033087    | 135.8764507 | 1.928538413 | 1.56E-16    | 70.45566209 |
| TMEM70       | NM_017866    | 224.9781248 | 6.744044037 | 5.33E-23    | 33.35952783 |
| GTF2E1       | NM_005513    | 70.42728775 | 1.314671765 | 2.13E-07    | 53.5702444  |
| LOC100996348 | NR_121631    | 106.7747767 | 1.353684646 | 1.73E-12    | 78.87714247 |
| BCKDHB       | NM_183050    | 169.8970423 | 0.615424877 | 5.64E-19    | 276.0646322 |
| ZBTB3        | NM_024784    | 95.34620525 | 4.598883766 | 7.62E-09    | 20.73246685 |
| XPOT         | NM_007235    | 98.2033481  | 3.580350957 | 1.21E-08    | 27.42841394 |
| RARA         | NM_001145302 | 103.6525111 | 6.210143583 | 5.04E-09    | 16.6908397  |
| SSBP4        | NM_032627    | 55.34620525 | 8.98462614  | 0.002696695 | 6.160101086 |
| ZDHHC24      | NM_207340    | 112.2239396 | 6.298162832 | 6.10E-10    | 17.81851988 |
| LOH12CR1     | NM_001300742 | 128.6306359 | 0.161814404 | 2.68E-18    | 794.9269821 |
| STX8         | NR_033656    | 47.57014489 | 0.288498262 | 1.44E-05    | 164.8888437 |
| SERTAD3      | NM_203344    | 137.6731026 | 14.61610269 | 1.54E-09    | 9.419275815 |
| EXOSC10      | NM_001001998 | 104.4478793 | 1.064755204 | 3.16E-12    | 98.0956739  |
| POLR2J4      | NR_003655    | 58.73359358 | 2.792917035 | 1.32E-05    | 21.02948024 |
| EIF4G2       | NM_001418    | 145.5083703 | 8.026875771 | 1.02E-12    | 18.12764697 |
| GTSF1        | NM_144594    | 109.8970423 | 1.163540055 | 1.17E-13    | 94.45058791 |
| UBXN2B       | NM_001077619 | 112.2239396 | 0.188789926 | 2.13E-17    | 594.4381772 |
| GRWD1        | NM_031485    | 58.2033481  | 4.212524511 | 3.41E-05    | 13.81673815 |
| GMCL1        | NM_178439    | 65.24324752 | 0.195439959 | 1.57E-09    | 333.8275752 |
| SPATA2L      | NM_152339    | 178.7335936 | 34.2536596  | 5.67E-09    | 5.217941548 |
| TAF2         | NM_003184    | 158.9987163 | 0.054927295 | 2.16E-26    | 2894.712284 |
| IREB2        | NM_004136    | 52.22393965 | 1.418985205 | 6.53E-05    | 36.80372386 |
| MRPS30       | NM_016640    | 84.4478793  | 0.319634364 | 1.35E-12    | 264.2015027 |
| SOCS3        | NM_003955    | 198.7335936 | 15.84529565 | 5.60E-15    | 12.54211963 |
| C16orf70     | NM_025187    | 118.7335936 | 0.660589077 | 7.48E-15    | 179.7389597 |
| OVOL1        | NM_004561    | 64.18275656 | 3.517936573 | 7.99E-06    | 18.24443256 |
| RALGAPA2     | NM_020343    | 97.67310262 | 0.131141401 | 4.35E-12    | 744.7922758 |
| MRPS17       | NM_015969    | 111.6936942 | 10.61978238 | 2.61E-08    | 10.51751252 |
| GPR3         | NM_005281    | 106.7747767 | 9.439836248 | 6.26E-08    | 11.31108357 |
| GGPS1        | NM_001037277 | 74.55083703 | 6.12979074  | 8.77E-06    | 12.16205254 |
| PIM1         | NM_001243186 | 112.2239396 | 1.523143333 | 6.97E-14    | 73.679172   |
| STAU1        | NM_017452    | 63.38738834 | 1.279935019 | 4.12E-06    | 49.52391128 |

|                 |              |             |             |             |             |
|-----------------|--------------|-------------|-------------|-------------|-------------|
| PPIC            | NM_000943    | 135.8764507 | 4.774286478 | 2.99E-13    | 28.46005395 |
| COIL            | NM_004645    | 99.5289618  | 1.052119255 | 4.41E-12    | 94.59855555 |
| UQCRH           | NM_001297565 | 81.59073644 | 6.735118545 | 1.03E-06    | 12.11422425 |
| LPAR5           | NM_020400    | 78.99871632 | 2.390601448 | 1.14E-08    | 33.04554023 |
| PLXNA3          | NM_017514    | 57.67310262 | 1.183704118 | 1.81E-06    | 48.72256651 |
| PLA2G7          | NM_001168357 | 67.83526763 | 3.011237615 | 9.67E-07    | 22.52737124 |
| PRICKLE3        | NM_006150    | 80          | 11.78697257 | 4.52E-05    | 6.787154166 |
| GAA             | NM_001079804 | 169.6319195 | 3.87131808  | 7.15E-18    | 43.81761355 |
| SETD8           | NM_020382    | 70.42728775 | 3.755951195 | 3.30E-06    | 18.75085274 |
| RPL37           | NM_000997    | 136.1415735 | 18.54668687 | 1.90E-08    | 7.340479432 |
| PTCD1           | NM_015545    | 93.54955335 | 4.501200428 | 1.22E-08    | 20.78324546 |
| TRIM33          | NM_015906    | 60.79536822 | 1.062257786 | 9.15E-07    | 57.23221707 |
| OPN3            | NM_014322    | 80.26512274 | 0.059161092 | 1.54E-13    | 1356.721465 |
| CCSAP           | NM_145257    | 97.14285714 | 5.712702759 | 5.54E-08    | 17.0047106  |
| PPP1R2          | NM_001291504 | 169.3667968 | 3.027933563 | 2.18E-17    | 55.9347797  |
| DPY19L3         | NM_001172774 | 61.3256137  | 1.420519427 | 9.40E-06    | 43.17126014 |
| FGFR3           | NM_001163213 | 134.550837  | 5.081118561 | 1.56E-12    | 26.48055451 |
| ZNF213          | NM_001134655 | 100.7953682 | 3.874328419 | 7.47E-10    | 26.01621683 |
| ABHD3           | NM_138340    | 206.5096539 | 3.173186798 | 2.37E-20    | 65.07957681 |
| C8orf44-SGK3    | NM_001204173 | 67.57014489 | 1.784586264 | 2.18E-06    | 37.86319902 |
| DHX34           | NM_014681    | 118.4684708 | 0.791945661 | 2.31E-14    | 149.5916661 |
| TMEM216         | NM_016499    | 129.8970423 | 6.935917108 | 3.00E-11    | 18.72817109 |
| RRP36           | NM_033112    | 72.48906239 | 7.093478293 | 8.52E-06    | 10.21911387 |
| TAX1BP1         | NM_006024    | 135.3462052 | 0.458143138 | 3.73E-17    | 295.4234039 |
| POP5            | NM_015918    | 132.2239396 | 14.75208932 | 1.36E-08    | 8.963065284 |
| NAGPA-AS1       | NR_038913    | 50.42728775 | 1.83002943  | 8.56E-06    | 27.55545181 |
| THUMPD3         | NM_015453    | 177.9382254 | 1.35457925  | 1.78E-22    | 131.3605131 |
| NUP85           | NM_024844    | 124.1827566 | 4.311859181 | 1.54E-11    | 28.80028112 |
| METAP1          | NM_015143    | 157.9382254 | 1.410239272 | 5.34E-17    | 111.9939209 |
| C6orf120        | NM_001029863 | 103.6525111 | 6.456497755 | 5.96E-09    | 16.05398391 |
| CSRP2           | NM_001300965 | 117.9382254 | 3.203834939 | 1.04E-11    | 36.81157975 |
| RSG1            | NM_030907    | 86.77477667 | 4.291506326 | 2.26E-08    | 20.22012088 |
| SUCLG1          | NM_003849    | 36.40669621 | 1.349242158 | 0.00153028  | 26.98307046 |
| NAT10           | NM_001144030 | 95.87645073 | 0.986171211 | 6.76E-11    | 97.22089805 |
| ATP6V1B1-AS1    | NR_110274    | 42.12098192 | 1.581370582 | 5.89E-05    | 26.63574396 |
| MRPL48          | NM_016055    | 149.8970423 | 0.573844665 | 5.92E-19    | 261.2153626 |
| MRS2            | NM_020662    | 138.9987163 | 1.710678588 | 1.15E-16    | 81.25355478 |
| NGRN            | NR_028052    | 155.3462052 | 5.159707234 | 3.57E-15    | 30.10756196 |
| TATDN1          | NR_027427    | 141.5907364 | 3.82835669  | 2.60E-13    | 36.98472946 |
| ENTPD5          | NM_001249    | 160.5302455 | 0.874773509 | 5.63E-19    | 183.5106388 |
| GADD45GIP1      | NM_052850    | 164.1827566 | 13.7360041  | 8.96E-12    | 11.9527306  |
| LDHD            | NM_153486    | 84.97812478 | 3.319583957 | 6.51E-09    | 25.59902864 |
| TASP1           | NM_017714    | 101.3256137 | 0.030854725 | 1.76E-15    | 3283.957736 |
| AGO1            | NM_012199    | 169.6319195 | 1.870692749 | 7.49E-19    | 90.67866417 |
| HGS             | NM_004712    | 87.03989941 | 9.8000264   | 4.94E-06    | 8.881598463 |
| TTC38           | NM_017931    | 135.8764507 | 3.523713076 | 1.43E-13    | 38.56058873 |
| TRMT11          | NM_001031712 | 138.7335936 | 0.220614498 | 3.68E-21    | 628.8507556 |
| MRPS31          | NM_005830    | 115.0810825 | 0.481420002 | 1.68E-14    | 239.0450791 |
| DNAJC14         | NM_032364    | 60.79536822 | 10.17030837 | 0.000689555 | 5.977731057 |
| OSBPL11         | NM_022776    | 107.8352676 | 1.155908348 | 1.77E-11    | 93.29049987 |
| RPF2            | NM_032194    | 92.75418513 | 1.364549273 | 1.21E-09    | 67.97422925 |
| RPL7L1          | NM_198486    | 103.1222656 | 4.369371631 | 3.60E-10    | 23.6011661  |
| PPM1G           | NM_177983    | 143.1222656 | 2.17726441  | 4.61E-16    | 65.73490337 |
| EEF1A2          | NM_001958    | 40          | 5.638676917 | 0.003825145 | 7.093862725 |
| USP5            | NM_003481    | 78.99871632 | 2.599955198 | 7.67E-08    | 30.38464524 |
| CDCA7           | NM_031942    | 91.95881691 | 4.488512862 | 1.06E-08    | 20.48759127 |
| TMED9           | NM_017510    | 151.9588169 | 0.793629787 | 1.82E-20    | 191.4731774 |
| FZD1            | NM_003505    | 58.99871632 | 8.257184362 | 0.000280299 | 7.145137342 |
| PHOSPHO2-KLHL23 | NM_001199290 | 161.3256137 | 2.858736367 | 1.82E-16    | 56.4324908  |
| MAP4K3          | NM_001270425 | 108.1003904 | 0.146696717 | 2.48E-14    | 736.8971355 |
| USP48           | NM_001032730 | 138.2033481 | 0.926743845 | 1.09E-15    | 149.1278835 |
| CENPV           | NM_181716    | 126.7747767 | 6.432775682 | 6.61E-11    | 19.70763212 |
| E2F5            | NM_001083588 | 43.65251108 | 1.925172182 | 0.000463975 | 22.674601   |
| CSF1            | NM_172210    | 43.38738834 | 3.730378436 | 0.001860964 | 11.63082756 |



|              |              |             |             |             |             |
|--------------|--------------|-------------|-------------|-------------|-------------|
| HMG2N        | NM_005517    | 75.61132799 | 10.6817851  | 0.000138601 | 7.078529222 |
| FAM21A       | NM_001291398 | 75.61132799 | 0.376161504 | 1.18E-09    | 201.0076181 |
| LEPROT       | NM_001198681 | 87.03989941 | 1.614123322 | 4.43E-10    | 53.92394634 |
| RASA2        | NM_006506    | 155.611328  | 0.155504269 | 3.74E-22    | 1000.688466 |
| ACAA1        | NM_001130410 | 61.85585918 | 4.928054532 | 1.96E-05    | 12.55178058 |
| CKAP2        | NM_001098525 | 92.48906239 | 4.089174597 | 2.02E-08    | 22.61802723 |
| RB1CC1       | NM_001083617 | 73.28443061 | 1.023834569 | 1.67E-08    | 71.57839052 |
| SLC25A16     | NM_152707    | 96.14157347 | 0.631655923 | 1.04E-12    | 152.2056074 |
| GPC1         | NM_002081    | 83.65251108 | 2.318417703 | 1.71E-08    | 36.08172546 |
| MED17        | NM_004268    | 158.2033481 | 3.553258049 | 1.01E-15    | 44.52346155 |
| RNF215       | NM_001017981 | 57.67310262 | 8.129097174 | 0.001069172 | 7.094650413 |
| ALDH1B1      | NM_000692    | 141.3256137 | 4.614966008 | 1.38E-14    | 30.62332712 |
| GFM2         | NM_170681    | 96.67181894 | 2.626121322 | 4.43E-10    | 36.81163477 |
| EEF1A1       | NM_001402    | 1497.526394 | 215.2865666 | 1.24E-79    | 6.955967658 |
| CAMKK1       | NM_032294    | 51.69369417 | 2.693506849 | 6.44E-05    | 19.19196685 |
| RAET1K       | NR_024045    | 126.5096539 | 3.806621901 | 1.66E-13    | 33.23410027 |
| EFHD2        | NM_024329    | 161.5907364 | 3.029252351 | 1.78E-17    | 53.34343848 |
| SEL1L3       | NM_001297592 | 31.69369417 | 1.218614494 | 0.001259588 | 26.00797407 |
| MOB3A        | NM_130807    | 107.3050222 | 4.230666496 | 3.70E-10    | 25.36362114 |
| MLST8        | NM_001199174 | 86.24453119 | 6.144273868 | 4.86E-07    | 14.03657015 |
| ADAP2        | NM_018404    | 75.08108251 | 0.098343134 | 3.61E-12    | 763.4603432 |
| FAM53A       | NM_001174070 | 35.61132799 | 0.019742229 | 5.15E-06    | 1803.814928 |
| L3MBTL1      | NM_032107    | 163.9176338 | 5.426366222 | 1.68E-15    | 30.20762461 |
| LOC553103    | NR_110997    | 129.3667968 | 0.696366831 | 5.34E-15    | 185.7739213 |
| CLK1         | NM_001162407 | 140.5302455 | 5.530389978 | 1.35E-13    | 25.41054899 |
| FAM86C2P     | NR_024249    | 131.9588169 | 1.690726995 | 1.12E-15    | 78.04856566 |
| GTF2A2       | NM_004492    | 132.4890624 | 0.404928049 | 2.62E-19    | 327.1916155 |
| EME1         | NM_001166131 | 149.8970423 | 14.23500904 | 1.20E-10    | 10.53016839 |
| CCNK         | NM_001099402 | 100.7953682 | 0.555808828 | 1.05E-12    | 181.3489874 |
| SLC9A3R1     | NM_004252    | 244.1827566 | 9.521452655 | 3.42E-21    | 25.64553597 |
| FAM110C      | NM_001077710 | 72.48906239 | 1.655350396 | 5.18E-08    | 43.79076634 |
| HERC5        | NM_016323    | 98.46847084 | 0.271615329 | 4.31E-14    | 362.5291377 |
| AGPS         | NM_003659    | 121.5907364 | 0.107552935 | 1.07E-17    | 1130.519929 |
| NDUFS6       | NM_004553    | 84.4478793  | 2.324377649 | 1.18E-09    | 36.33139363 |
| KATNA1       | NM_007044    | 121.8558592 | 1.342273389 | 2.77E-13    | 90.78318932 |
| SEC14L2      | NM_001291932 | 115.3462052 | 11.81091863 | 7.86E-08    | 9.766065522 |
| TERF2        | NM_005652    | 66.50965393 | 5.627500358 | 1.96E-05    | 11.81868498 |
| NFE2L3       | NM_004289    | 137.1428571 | 4.635103153 | 7.02E-13    | 29.58787596 |
| MIATNB       | NR_110543    | 88.10039037 | 1.137051797 | 5.49E-10    | 77.48142221 |
| ZNF766       | NM_001010851 | 58.2033481  | 2.194853608 | 9.23E-06    | 26.51810029 |
| MCM8-AS1     | NR_110101    | 95.34620525 | 2.628862921 | 1.45E-09    | 36.26899085 |
| CTTN         | NM_005231    | 103.9176338 | 4.672009508 | 3.54E-09    | 22.24259896 |
| LSM1         | NR_045493    | 92.48906239 | 2.851697966 | 2.88E-09    | 32.43297975 |
| PCTP         | NM_021213    | 159.2638391 | 2.946667599 | 1.33E-16    | 54.04879706 |
| PLA2G16      | NM_007069    | 75.61132799 | 1.709771389 | 1.47E-07    | 44.22306307 |
| SPATA20      | NM_001258372 | 133.5495533 | 4.842385855 | 1.10E-13    | 27.57928784 |
| USF1         | NM_007122    | 103.3873883 | 4.208504182 | 2.44E-10    | 24.56630286 |
| LMAN1        | NM_005570    | 86.50965393 | 1.040872841 | 1.08E-09    | 83.11260558 |
| PPP1R37      | NM_019121    | 75.87645073 | 1.776256215 | 1.12E-07    | 42.71706417 |
| EDEM1        | NM_014674    | 127.3050222 | 1.553056926 | 1.31E-14    | 81.9706091  |
| RERE         | NM_012102    | 141.3256137 | 0.889821099 | 7.49E-15    | 158.8247502 |
| SHANK3       | NM_033517    | 51.42857143 | 1.055109039 | 4.91E-06    | 48.74242331 |
| WDR90        | NM_145294    | 40.79536822 | 2.523178116 | 0.000733876 | 16.16824748 |
| XRN2         | NM_012255    | 108.5714286 | 0.256559906 | 8.40E-15    | 423.1815882 |
| MESDC1       | NM_022566    | 129.8970423 | 18.60180386 | 1.81E-07    | 6.983034725 |
| DTYMK        | NR_033255    | 104.1827566 | 5.031145132 | 2.50E-09    | 20.70756335 |
| C4orf33      | NM_001099783 | 65.97940845 | 0.049531292 | 1.25E-10    | 1332.075258 |
| TTC9C        | NM_173810    | 78.46847084 | 3.814845766 | 1.82E-07    | 20.56923809 |
| FNIP1        | NM_133372    | 107.8352676 | 0.627423037 | 1.71E-12    | 171.8701121 |
| DEPDC1B      | NM_018369    | 121.5907364 | 0.50276256  | 3.89E-15    | 241.8452487 |
| AVEN         | NM_020371    | 51.69369417 | 0.481641038 | 6.31E-06    | 107.3282593 |
| PRKCQ-AS1    | NR_036502    | 107.3050222 | 4.507615245 | 9.87E-11    | 23.80527537 |
| LOC100270746 | NR_026776    | 91.95881691 | 11.95242299 | 0.000153908 | 7.693738499 |
| SIRT6        | NM_016539    | 106.7747767 | 6.292668159 | 5.69E-09    | 16.96812449 |

|              |              |             |             |             |             |
|--------------|--------------|-------------|-------------|-------------|-------------|
| DEPDC1-AS1   | NR_110671    | 81.3256137  | 1.789366006 | 3.75E-08    | 45.44940132 |
| UROS         | NM_000375    | 212.7541851 | 3.769247674 | 1.42E-21    | 56.44473473 |
| MRT04        | NM_016183    | 101.060491  | 9.725624529 | 3.00E-07    | 10.39115695 |
| LINC00936    | NR_028138    | 154.8159598 | 37.01710665 | 3.28E-06    | 4.182281485 |
| FBXL6        | NM_024555    | 172.7541851 | 31.06448439 | 1.22E-08    | 5.561147675 |
| GSK3B        | NM_002093    | 147.0398994 | 0.611759577 | 3.38E-16    | 240.3556967 |
| ISG20        | NM_002201    | 47.30502215 | 2.338095967 | 6.91E-05    | 20.23228422 |
| CLCN7        | NM_001114331 | 67.30502215 | 0.279860553 | 2.78E-10    | 240.4948516 |
| VPS16        | NM_080413    | 49.10167405 | 0.93951561  | 3.86E-05    | 52.26275492 |
| FAM173A      | NM_023933    | 209.3667968 | 25.98879497 | 3.23E-11    | 8.056040959 |
| WDR62        | NM_001083961 | 87.03989941 | 1.560271714 | 8.79E-09    | 55.78509092 |
| ANKLE2       | NM_015114    | 57.67310262 | 4.359618912 | 0.000127769 | 13.22893211 |
| LINC01185    | NR_033980    | 72.22393965 | 1.272110709 | 1.41E-07    | 56.77488536 |
| CRY1         | NM_004075    | 61.3256137  | 0.290622054 | 1.60E-07    | 211.015003  |
| NDUFA13      | NM_015965    | 93.28443061 | 1.168230504 | 3.40E-12    | 79.85104846 |
| EDEM2        | NM_018217    | 99.79408454 | 1.941254323 | 1.07E-10    | 51.40701214 |
| PERP         | NM_022121    | 157.9382254 | 1.579153317 | 1.42E-18    | 100.0144974 |
| TMF1         | NM_007114    | 103.9176338 | 0.525363624 | 3.92E-13    | 197.8013496 |
| ZMAT5        | NM_019103    | 127.0398994 | 1.106836309 | 1.15E-14    | 114.7774954 |
| PXN-AS1      | NR_038924    | 44.71300204 | 5.508429412 | 0.001055396 | 8.117196155 |
| IKBKE        | NM_001193322 | 59.5289618  | 2.930418583 | 6.92E-06    | 20.31414971 |
| AUP1         | NM_181575    | 80.79536822 | 11.73191438 | 7.77E-05    | 6.886801728 |
| DDIT4L       | NM_145244    | 123.3873883 | 8.987362356 | 4.98E-10    | 13.72898782 |
| EFR3A        | NM_015137    | 210.9575332 | 0.658419192 | 4.51E-26    | 320.4000368 |
| ERBB3        | NM_001005915 | 140         | 6.774658987 | 4.32E-13    | 20.66524681 |
| OAZ2         | NM_001301302 | 108.8365513 | 9.462940584 | 2.51E-08    | 11.50134573 |
| EFNA4        | NM_182690    | 220.2651227 | 4.937971501 | 4.80E-24    | 44.60639813 |
| TFAP2E       | NM_178548    | 120.5302455 | 2.903052872 | 4.46E-12    | 41.51844654 |
| FAM24B-CUZD1 | NR_037915    | 59.5289618  | 1.416535387 | 6.04E-06    | 42.02433795 |
| SOX4         | NM_003107    | 114.8159598 | 14.75788835 | 3.60E-07    | 7.779972109 |
| KLHL12       | NM_021633    | 207.5701449 | 0.663115825 | 2.97E-28    | 313.0224569 |
| DUSP5        | NM_004419    | 69.63191953 | 14.85183706 | 0.001516981 | 4.688438155 |
| ELF3         | NM_001114309 | 178.9987163 | 7.217465254 | 9.42E-17    | 24.80077285 |
| ESYT1        | NM_015292    | 135.3462052 | 7.119871067 | 5.16E-12    | 19.00964273 |
| FBXO45       | NM_001105573 | 49.89704227 | 1.655387399 | 5.77E-05    | 30.14221463 |
| LINC01057    | NR_104131    | 97.93822536 | 0.237899214 | 3.42E-12    | 411.6794824 |
| TSC22D2      | NM_014779    | 80.53024548 | 1.753144821 | 4.85E-08    | 45.93473654 |
| FRY-AS1      | NR_103839    | 35.34620525 | 1.566306891 | 0.000995503 | 22.56658988 |
| SH3BGRL2     | NM_031469    | 51.95881691 | 0.310789848 | 1.31E-06    | 167.1831217 |
| AMACR        | NM_014324    | 174.0797988 | 2.049682167 | 6.53E-20    | 84.93014266 |
| UGGT2        | NM_020121    | 150.4272878 | 0.409005334 | 1.55E-17    | 367.7880835 |
| BRPF1        | NM_004634    | 80.79536822 | 1.073352465 | 9.22E-10    | 75.27384609 |
| DNAJB9       | NM_012328    | 59.5289618  | 11.27054331 | 0.001431886 | 5.281818291 |
| WDR36        | NM_139281    | 89.89704227 | 0.804913402 | 4.10E-10    | 111.685359  |
| CENPH        | NM_022909    | 121.8558592 | 0.261499981 | 7.26E-19    | 465.9880229 |
| SNF          | NM_006142    | 224.713002  | 44.85669363 | 7.33E-09    | 5.009575692 |
| CBX2         | NM_032647    | 175.8764507 | 12.98217691 | 6.89E-14    | 13.54753151 |
| CNBP         | NM_001127193 | 162.6512274 | 5.954006349 | 1.51E-15    | 27.31794658 |
| VPS28        | NM_183057    | 167.5701449 | 8.350245948 | 5.55E-15    | 20.06768973 |
| EID2B        | NM_152361    | 75.08108251 | 9.960025769 | 0.0002027   | 7.538241793 |
| KLHL7        | NR_033329    | 153.2844306 | 4.148844881 | 9.40E-16    | 36.94629108 |
| ZNF680       | NM_001130022 | 106.2445312 | 1.156839267 | 7.23E-12    | 91.84035692 |
| CDCA4        | NM_017955    | 106.5096539 | 6.20959117  | 2.19E-09    | 17.15244225 |
| DOCK6        | NM_020812    | 37.67310262 | 2.122323463 | 0.00220614  | 17.75087694 |
| POLR3G       | NM_006467    | 177.6731026 | 1.44853803  | 1.12E-20    | 122.6568436 |
| MDP1         | NM_001199822 | 97.93822536 | 19.71316861 | 9.02E-05    | 4.968162517 |
| PDLIM7       | NM_213636    | 178.9987163 | 15.94961044 | 2.83E-13    | 11.22276416 |
| PRKCH        | NM_006255    | 112.4890624 | 0.508704863 | 1.21E-12    | 221.128341  |
| TMOD3        | NM_014547    | 149.6319195 | 1.450445031 | 1.35E-15    | 103.1627648 |
| CNNM2        | NM_199077    | 178.4684708 | 4.262465121 | 1.20E-18    | 41.86977858 |
| GHITM        | NM_014394    | 38.99871632 | 1.563709129 | 0.000397819 | 24.9398789  |
| LNX1         | NM_001126328 | 37.14285714 | 1.225489835 | 0.000315174 | 30.30858035 |
| PRUNE        | NM_021222    | 70.42728775 | 1.18095333  | 8.00E-08    | 59.63596186 |
| ABCD1        | NM_000033    | 100.7953682 | 2.207353166 | 3.65E-11    | 45.6634533  |

|              |              |             |             |             |             |
|--------------|--------------|-------------|-------------|-------------|-------------|
| ACVR2A       | NM_001278579 | 63.38738834 | 0.441286726 | 1.04E-07    | 143.6421824 |
| ARPC4        | NM_005718    | 113.0193079 | 4.113865803 | 1.77E-11    | 27.47277458 |
| ARHGAP4      | NM_001164741 | 72.75418513 | 1.824054095 | 9.14E-08    | 39.88597999 |
| LINC011106   | NR_027244    | 109.3667968 | 11.18590007 | 6.31E-08    | 9.777201304 |
| SIL1         | NM_001037633 | 172.7541851 | 0.948206778 | 1.22E-18    | 182.1904136 |
| ARHGAP1      | NM_004308    | 127.0398994 | 0.782730016 | 1.85E-16    | 162.3036    |
| RRAS2        | NM_001177315 | 51.69369417 | 0.401341115 | 2.34E-06    | 128.8023883 |
| RGP1         | NM_001080496 | 109.6319195 | 2.17272031  | 1.48E-12    | 50.45836733 |
| MYH9         | NM_002473    | 203.6525111 | 2.633139906 | 2.04E-20    | 77.34207764 |
| SH3PXD2B     | NM_001017995 | 51.69369417 | 1.250139818 | 8.82E-06    | 41.35033012 |
| GPAM         | NM_020918    | 172.7541851 | 0.72423417  | 1.44E-22    | 238.5336018 |
| CCZ1B        | NM_198097    | 129.1016741 | 1.205531281 | 1.83E-15    | 107.0911026 |
| PLAA         | NM_001031689 | 60.53024548 | 2.196101689 | 8.34E-06    | 27.56258773 |
| SOX18        | NM_018419    | 62.85714286 | 3.137951593 | 1.29E-05    | 20.03126594 |
| FTSJ3        | NM_017647    | 173.2844306 | 21.57588727 | 6.44E-11    | 8.031393029 |
| C10orf35     | NM_145306    | 75.08108251 | 2.138313382 | 2.68E-08    | 35.11229137 |
| MDN1         | NM_014611    | 92.48906239 | 1.427610497 | 8.83E-09    | 64.78592204 |
| TTL          | NM_153712    | 25.71428571 | 0.67581642  | 0.003681967 | 38.04921714 |
| FKBP1B       | NM_004116    | 86.24453119 | 3.090792318 | 2.07E-08    | 27.90369663 |
| LOC100129917 | NR_036512    | 104.1827566 | 7.826055853 | 8.01E-08    | 13.31229402 |
| VTA1         | NM_001286371 | 69.89704227 | 0.773624112 | 3.94E-08    | 90.35013408 |
| MTIF2        | NM_001005369 | 87.57014489 | 1.812751035 | 2.23E-09    | 48.30787196 |
| DFNB31       | NM_015404    | 101.3256137 | 1.683689282 | 7.61E-10    | 60.18070838 |
| MTSS1        | NM_001282974 | 44.18275656 | 0.693369166 | 7.02E-05    | 63.72183643 |
| RAET1L       | NM_130900    | 35.61132799 | 0.877064794 | 0.000279437 | 40.60284739 |
| UTP15        | NM_032175    | 73.28443061 | 0.27662238  | 1.32E-10    | 264.9258917 |
| TACO1        | NM_016360    | 166.5096539 | 4.624602882 | 1.67E-17    | 36.00517886 |
| SELO         | NM_031454    | 86.50965393 | 4.664757453 | 7.08E-08    | 18.54537022 |
| RAB3B        | NM_002867    | 107.0398994 | 0.849769513 | 1.64E-12    | 125.9634499 |
| USP36        | NM_025090    | 79.26383906 | 3.614696844 | 9.36E-08    | 21.9282121  |
| PLK1         | NM_005030    | 112.4890624 | 5.287912544 | 2.99E-10    | 21.2728674  |
| NCAPG        | NM_022346    | 69.36679679 | 0.789060449 | 1.29E-07    | 87.9106244  |
| TSTD2        | NM_139246    | 77.93822536 | 3.05481349  | 1.21E-07    | 25.51325167 |
| SPAG4        | NM_003116    | 131.6936942 | 32.74522648 | 1.80E-05    | 4.0217677   |
| ZNF860       | NM_001137674 | 94.55083703 | 2.784943496 | 4.45E-10    | 33.95072006 |
| MYSM1        | NM_001085487 | 109.8970423 | 1.476097692 | 1.15E-11    | 74.45106303 |
| SMPD2        | NM_003080    | 164.4478793 | 18.92484205 | 9.31E-11    | 8.689524535 |
| FAM114A2     | NM_018691    | 141.3256137 | 0.434613929 | 2.38E-18    | 325.1750674 |
| GNL3L        | NM_019067    | 80.53024548 | 1.828627029 | 3.11E-08    | 44.03863895 |
| ERN1         | NM_001433    | 204.713002  | 2.337123175 | 3.32E-21    | 87.59187546 |
| CERS6        | NM_001256126 | 78.73359358 | 0.712363383 | 9.05E-09    | 110.5244815 |
| PRMT7        | NM_001290018 | 158.2033481 | 1.377033503 | 7.89E-18    | 114.8870727 |
| SNRNP27      | NM_006857    | 126.5096539 | 1.100128262 | 2.87E-16    | 114.9953677 |
| RPL29        | NM_000992    | 138.7335936 | 15.78142441 | 6.09E-09    | 8.790942436 |
| SNHG5        | NR_003038    | 200.7953682 | 21.70312212 | 5.80E-12    | 9.251911644 |
| ARVCF        | NM_001670    | 100.5302455 | 5.060642421 | 9.50E-09    | 19.86511536 |
| ZNF131       | NR_123720    | 117.9382254 | 1.701619125 | 2.87E-12    | 69.30941456 |
| RNF25        | NM_022453    | 90.69241049 | 2.780538277 | 5.34E-10    | 32.61685381 |
| OSMR-AS1     | NR_109951    | 124.4478793 | 0.656561159 | 1.72E-14    | 189.5449914 |
| SLC20A1      | NM_005415    | 197.6731026 | 6.468935408 | 3.31E-18    | 30.55728496 |
| LOC100288911 | NR_037631    | 57.14285714 | 1.246738412 | 0.000271857 | 45.83387869 |
| POMGNT2      | NM_032806    | 169.6319195 | 1.856663873 | 5.82E-20    | 91.36382842 |
| PSMD3        | NM_002809    | 90.42728775 | 4.037896194 | 1.29E-08    | 22.3946539  |
| RPL32        | NM_001007073 | 160.5302455 | 12.27952203 | 2.00E-12    | 13.0730044  |
| TRIM37       | NM_001005207 | 123.3873883 | 0.848731338 | 4.30E-14    | 145.3786172 |
| YWHAQ        | NM_006826    | 98.46847084 | 2.312348701 | 7.69E-10    | 42.58374648 |
| VPS4B        | NM_004869    | 103.9176338 | 1.324525229 | 1.69E-11    | 78.45651525 |
| HEMK1        | NM_016173    | 72.75418513 | 5.153413649 | 2.69E-06    | 14.11766842 |
| FAM212A      | NM_203370    | 123.1222656 | 12.71210449 | 7.03E-08    | 9.685435306 |
| STX10        | NM_001271611 | 55.08108251 | 7.636095308 | 0.001475077 | 7.21325236  |
| QRICH1       | NM_198880    | 79.26383906 | 2.708667366 | 1.02E-07    | 29.26303911 |
| SNAPC5       | NM_006049    | 98.2033481  | 7.528170596 | 5.97E-08    | 13.04478251 |
| LOC101929655 | NR_120365    | 55.08108251 | 0.209947936 | 6.69E-07    | 262.3559129 |
| ZZZ3         | NM_015534    | 95.34620525 | 0.860150834 | 8.80E-11    | 110.848239  |

|            |              |             |             |             |             |
|------------|--------------|-------------|-------------|-------------|-------------|
| SERAC1     | NR_073096    | 114.8159598 | 0.024566079 | 7.06E-21    | 4673.760132 |
| COPS2      | NM_004236    | 67.83526763 | 0.416446713 | 1.22E-09    | 162.8906303 |
| IDE        | NM_004969    | 144.1827566 | 0.928694513 | 2.29E-16    | 155.2531587 |
| RASA3      | NM_007368    | 92.48906239 | 0.445885116 | 8.36E-11    | 207.42801   |
| TRAM2      | NM_012288    | 175.0810825 | 3.075928857 | 1.57E-17    | 56.91974381 |
| SESN1      | NM_014454    | 35.08108251 | 0.791976438 | 0.000544036 | 44.29561391 |
| MTOR       | NM_004958    | 97.40797988 | 0.43745849  | 1.72E-11    | 222.6679377 |
| MRPS6      | NM_032476    | 117.6731026 | 1.55547485  | 4.19E-12    | 75.65091947 |
| TRIM72     | NM_001008274 | 71.95881691 | 13.95957263 | 0.000807473 | 5.154800852 |
| EIF3I      | NM_003757    | 98.46847084 | 9.527024013 | 1.53E-07    | 10.33570092 |
| BEND3      | NM_001080450 | 70.16216501 | 0.037178325 | 2.02E-12    | 1887.179274 |
| EMB        | NM_198449    | 98.46847084 | 0.882383726 | 6.76E-11    | 111.5937068 |
| CAV1       | NM_001753    | 70.42728775 | 4.513914688 | 5.21E-06    | 15.60226381 |
| COMMD3     | NM_012071    | 120.7953682 | 2.544786341 | 4.28E-14    | 47.46778394 |
| TNS1       | NM_022648    | 26.77477667 | 0.433446201 | 0.004443528 | 61.77185687 |
| ARHGAP10   | NM_024605    | 63.91763382 | 0.259063664 | 3.24E-07    | 246.7255845 |
| SORBS3     | NM_001018003 | 49.10167405 | 4.899980358 | 0.00044307  | 10.02078998 |
| NPRL2      | NM_006545    | 121.8558592 | 15.0585876  | 6.43E-08    | 8.092117427 |
| IL17RB     | NM_018725    | 126.2445312 | 4.145572126 | 1.96E-12    | 30.45286087 |
| VMAC       | NM_001017921 | 73.01930787 | 6.121932824 | 6.87E-06    | 11.9274925  |
| SEMA3G     | NM_020163    | 103.1222656 | 0.452925727 | 1.94E-15    | 227.6803002 |
| MS4A10     | NM_206893    | 21.06049096 | 0.202254417 | 0.00460699  | 104.1287071 |
| TSPAN5     | NM_005723    | 70.42728775 | 2.88366189  | 1.28E-06    | 24.42286594 |
| GOLGA2     | NM_004486    | 72.22393965 | 7.389476208 | 2.36E-05    | 9.773891628 |
| ID2        | NM_002166    | 133.0193079 | 27.88267737 | 4.13E-06    | 4.770679161 |
| PARP4      | NM_006437    | 178.2033481 | 1.886031607 | 2.69E-18    | 94.48587575 |
| ANGEL1     | NM_015305    | 129.8970423 | 0.086981121 | 2.57E-21    | 1493.39352  |
| CHADL      | NM_138481    | 21.06049096 | 0.312534988 | 0.00460699  | 67.38602646 |
| PER1       | NM_002616    | 73.54955335 | 4.83173477  | 8.23E-07    | 15.22218351 |
| KIF15      | NM_020242    | 69.36679679 | 0.296697912 | 8.93E-09    | 233.7960393 |
| TAF7       | NM_005642    | 161.3256137 | 2.714451822 | 1.08E-17    | 59.43211531 |
| DMWD       | NM_004943    | 55.61132799 | 8.813385934 | 0.002210197 | 6.309870962 |
| POM121C    | NM_001099415 | 129.8970423 | 3.840192177 | 1.37E-11    | 33.82566191 |
| ZNF326     | NM_182975    | 186.7747767 | 0.536030127 | 5.46E-28    | 348.4408193 |
| TFPT       | NM_013342    | 75.34620525 | 17.25393624 | 0.001169667 | 4.366899482 |
| NRBF2      | NM_001282405 | 155.3462052 | 3.057755998 | 3.24E-16    | 50.80399004 |
| MIPEP      | NM_005932    | 64.18275656 | 0.398302542 | 2.23E-07    | 161.1407154 |
| EED        | NM_152991    | 153.2844306 | 2.821445815 | 1.65E-15    | 54.32832691 |
| TMEM185B   | NM_024121    | 89.89704227 | 6.408432729 | 2.12E-07    | 14.02792946 |
| C19orf68   | NM_199341    | 40.79536822 | 5.503590433 | 0.004979808 | 7.412500751 |
| SLC35E1    | NM_024881    | 37.40797988 | 0.831082868 | 8.47E-05    | 45.01113103 |
| SYNE4      | NM_001039876 | 135.8764507 | 9.355279479 | 2.69E-11    | 14.52403972 |
| SLC25A39   | NM_016016    | 133.5495533 | 6.52403235  | 1.53E-12    | 20.47040023 |
| TMEM170A   | NM_145254    | 223.6525111 | 3.295210098 | 1.82E-24    | 67.87200344 |
| DSCR3      | NM_006052    | 40.26512274 | 2.24683509  | 0.001052145 | 17.92081801 |
| SLCO4A1    | NM_016354    | 95.08108251 | 6.248839891 | 1.72E-07    | 15.21579752 |
| CFAP43     | NM_025145    | 124.4478793 | 0.43602783  | 8.68E-16    | 285.4126977 |
| C12orf10   | NM_021640    | 111.9588169 | 5.973619801 | 6.59E-10    | 18.74220667 |
| FHOD1      | NM_013241    | 156.1415735 | 12.89814691 | 4.24E-12    | 12.10573694 |
| ARHGAP23   | NM_001199417 | 49.10167405 | 3.408508096 | 0.00019537  | 14.40562049 |
| ZBTB2      | NM_020861    | 75.61132799 | 5.425898071 | 2.51E-06    | 13.93526509 |
| GPAA1      | NM_003801    | 120.7953682 | 10.30007568 | 2.83E-09    | 11.72761948 |
| DCUN1D5    | NM_032299    | 100.2651227 | 0.886459364 | 2.22E-11    | 113.10741   |
| OTUD6B-AS1 | NR_110439    | 58.73359358 | 2.788961445 | 1.19E-05    | 21.05930639 |
| WDR18      | NM_024100    | 67.57014489 | 1.377317456 | 2.40E-08    | 49.05923801 |
| EPS8       | NM_004447    | 127.0398994 | 1.14496351  | 8.14E-14    | 110.9554133 |
| YARS       | NM_003680    | 127.5701449 | 3.001704754 | 3.18E-13    | 42.49923139 |
| GATA2-AS1  | NR_125398    | 121.3256137 | 4.657483281 | 3.74E-11    | 26.04960799 |
| KMT2E      | NM_182931    | 80.79536822 | 1.71165438  | 9.97E-08    | 47.2030856  |
| FBXO30     | NM_032145    | 129.1016741 | 0.254197665 | 2.86E-20    | 507.8790714 |
| CRTC1      | NM_015321    | 63.1222656  | 1.425664235 | 5.43E-06    | 44.27568851 |
| NOL6       | NM_022917    | 60.26512274 | 4.587706155 | 3.15E-05    | 13.13622118 |
| ADPRHL2    | NM_017825    | 144.4478793 | 8.924763702 | 1.28E-12    | 16.18506485 |
| DDX60      | NM_017631    | 75.34620525 | 0.111230358 | 9.26E-11    | 677.3888598 |

|           |              |             |             |             |             |
|-----------|--------------|-------------|-------------|-------------|-------------|
| ZBTB33    | NM_006777    | 75.08108251 | 3.672300475 | 1.89E-07    | 20.44524489 |
| PEX26     | NM_017929    | 36.40669621 | 3.087016783 | 0.001379572 | 11.79348826 |
| ADPRM     | NM_020233    | 137.9382254 | 1.924779684 | 4.28E-16    | 71.66442294 |
| FUOM      | NM_001098483 | 77.40797988 | 8.263564301 | 1.72E-05    | 9.367383984 |
| RIPK2     | NM_003821    | 207.8352676 | 1.008655223 | 5.58E-27    | 206.0518429 |
| SH3BP1    | NM_018957    | 60.53024548 | 4.096616963 | 3.72E-05    | 14.77566637 |
| NFRKB     | NM_001143835 | 152.4890624 | 2.374985002 | 9.84E-17    | 64.20632647 |
| C16orf74  | NM_206967    | 109.6319195 | 4.469171443 | 1.01E-09    | 24.5307035  |
| KEAP1     | NM_203500    | 84.18275656 | 6.86061921  | 1.46E-06    | 12.27043128 |
| JRKL      | NM_001261833 | 106.3037385 | 4.664347985 | 3.41E-10    | 22.79069632 |
| NECAP1    | NR_024260    | 89.10167405 | 2.419734468 | 6.59E-09    | 36.82291393 |
| COX8A     | NM_004074    | 138.4684708 | 9.023879108 | 1.20E-10    | 15.34467264 |
| MED11     | NM_001001683 | 197.9382254 | 7.111491711 | 4.72E-18    | 27.83357324 |
| SNRPF     | NM_003095    | 89.36679679 | 1.410486333 | 7.49E-11    | 63.35885339 |
| MARCKSL1  | NR_052852    | 191.4285714 | 41.72580336 | 4.77E-08    | 4.587774375 |
| CRYM-AS1  | NR_026675    | 86.24453119 | 6.142986748 | 6.84E-07    | 14.03951119 |
| NYAP1     | NM_173564    | 35.08108251 | 2.445316455 | 0.002172578 | 14.34623418 |
| CLCN3     | NM_001829    | 115.611328  | 0.91986806  | 3.30E-13    | 125.6825115 |
| ENPP5     | NM_001290072 | 132.7541851 | 3.909870527 | 3.90E-13    | 33.95360133 |
| WDSUB1    | NM_152528    | 84.4478793  | 1.178962572 | 5.12E-09    | 71.62897387 |
| PHYH      | NM_001037537 | 61.59073644 | 2.186715038 | 1.84E-06    | 28.16587227 |
| H2AFY2    | NM_018649    | 107.0398994 | 2.269678277 | 1.26E-10    | 47.16082472 |
| SDCCAG8   | NM_006642    | 152.2239396 | 0.642442049 | 6.53E-17    | 236.9457914 |
| STX18-AS1 | NR_037888    | 187.0398994 | 0.220065411 | 9.56E-25    | 849.9286591 |
| ZSCAN21   | NM_145914    | 107.5701449 | 2.883355212 | 3.09E-11    | 37.30728162 |
| ZNF41     | NM_153380    | 48.83655131 | 1.975493489 | 0.000115037 | 24.72119072 |
| CPNE7     | NM_014427    | 63.38738834 | 6.305075243 | 0.000143272 | 10.05339126 |
| HRSP12    | NM_005836    | 235.0810825 | 2.3169234   | 3.55E-28    | 101.4626044 |
| TCTA      | NM_022171    | 92.48906239 | 17.81673574 | 5.78E-05    | 5.191133983 |
| OGFRP1    | NR_036498    | 89.63191953 | 6.094805825 | 1.19E-07    | 14.70627976 |
| RPS4X     | NM_001007    | 77.93822536 | 10.04623751 | 2.40E-05    | 7.757951699 |
| NAMPT     | NM_005746    | 77.67310262 | 3.181629128 | 1.40E-07    | 24.41299708 |
| ZNF264    | NM_003417    | 113.0193079 | 1.609615595 | 9.05E-13    | 70.21509251 |
| ZBTB17    | NM_001287603 | 74.28571429 | 1.86692525  | 1.30E-07    | 39.79040634 |
| HSPA4L    | NM_014278    | 136.6718189 | 0.907893192 | 6.64E-16    | 150.5373321 |
| MOSPD1    | NM_019556    | 77.14285714 | 1.696074121 | 3.34E-08    | 45.48318744 |
| GLRX3     | NM_001199868 | 58.73359358 | 1.193328177 | 4.54E-06    | 49.21830784 |
| COL6A1    | NM_001848    | 160         | 0.922563578 | 3.12E-21    | 173.4297818 |
| C10orf54  | NM_022153    | 120.7953682 | 1.603257857 | 7.40E-14    | 75.34369327 |
| CAMK2N1   | NM_018584    | 58.2033481  | 2.050924411 | 1.66E-06    | 28.37908008 |
| LARP1B    | NM_178043    | 112.2239396 | 1.537314629 | 1.32E-11    | 72.9999816  |
| GPR124    | NM_032777    | 52.22393965 | 2.406119431 | 7.46E-05    | 21.70463318 |
| MKKS      | NR_072977    | 103.9176338 | 2.641838759 | 8.42E-11    | 39.33534303 |
| ZNF445    | NM_181489    | 103.6525111 | 0.458814405 | 1.85E-14    | 225.9138114 |
| GJB5      | NM_005268    | 72.22393965 | 5.713393426 | 4.59E-06    | 12.64116336 |
| TTC37     | NM_014639    | 111.9588169 | 0.198177694 | 1.18E-15    | 564.941567  |
| LRR1      | NM_203467    | 98.99871632 | 3.88177821  | 1.00E-09    | 25.50344481 |
| SEC62     | NM_003262    | 61.06049096 | 1.84336193  | 5.16E-06    | 33.12452642 |
| TP53RK    | NM_033550    | 78.73359358 | 3.593459164 | 7.10E-08    | 21.91025137 |
| PTK2      | NM_001199649 | 97.67310262 | 1.689898877 | 3.78E-09    | 57.7981937  |
| IAH1      | NM_001039613 | 89.63191953 | 4.731302862 | 2.44E-08    | 18.94444768 |
| SLC25A11  | NM_003562    | 73.01930787 | 17.20108467 | 0.001120129 | 4.245040896 |
| KTI12     | NM_138417    | 94.81595977 | 8.114569157 | 1.02E-06    | 11.6846573  |
| EFR3B     | NM_014971    | 52.22393965 | 0.123053898 | 5.58E-07    | 424.398905  |
| SRD5A1    | NM_001047    | 114.550837  | 2.683242492 | 6.67E-12    | 42.69119819 |
| ZNF275    | NM_001080485 | 77.40797988 | 0.644156857 | 7.75E-10    | 120.1694573 |
| SDHAP2    | NR_003265    | 96.93694168 | 7.029391077 | 1.04E-07    | 13.79023312 |
| TDP2      | NM_016614    | 144.1827566 | 2.42690176  | 7.55E-16    | 59.4102155  |
| CHPF      | NM_024536    | 120.2651227 | 16.38591021 | 1.18E-07    | 7.33954484  |
| TIMM13    | NM_012458    | 121.060491  | 19.84243596 | 1.82E-06    | 6.101090167 |
| RILPL2    | NM_145058    | 109.1016741 | 2.024415616 | 2.85E-12    | 53.89292257 |
| AKTIP     | NM_022476    | 74.55083703 | 0.295853661 | 3.13E-11    | 251.9855148 |
| UBE2N     | NM_003348    | 95.34620525 | 1.962470148 | 6.11E-10    | 48.58479266 |
| LAD1      | NM_005558    | 107.3050222 | 6.722466576 | 3.57E-09    | 15.96215034 |

|              |              |             |             |             |             |
|--------------|--------------|-------------|-------------|-------------|-------------|
| CD40         | NM_001250    | 89.63191953 | 0.879061629 | 6.80E-12    | 101.9631805 |
| SMURF2       | NM_022739    | 145.9794085 | 3.748171238 | 4.28E-14    | 38.94683545 |
| KTN1-AS1     | NR_027123    | 129.1016741 | 11.77565648 | 2.73E-09    | 10.96343751 |
| CALM1        | NM_006888    | 198.2033481 | 8.707481385 | 9.87E-18    | 22.76241996 |
| LARS         | NM_020117    | 49.63191953 | 1.213053887 | 0.000126453 | 40.91485139 |
| KDM1A        | NM_001009999 | 156.4066962 | 1.266050565 | 2.72E-17    | 123.5390596 |
| TMEM206      | NM_001198862 | 115.8764507 | 1.641705743 | 2.03E-12    | 70.58295998 |
| ADA          | NM_000022    | 88.83655131 | 2.281458321 | 3.62E-09    | 38.93849407 |
| SIAH2        | NM_005067    | 184.1827566 | 3.729183551 | 2.93E-19    | 49.38956586 |
| TSR1         | NM_018128    | 77.93822536 | 11.62992177 | 9.92E-05    | 6.701526195 |
| NRAS         | NM_002524    | 58.2033481  | 5.377407093 | 7.33E-05    | 10.8236827  |
| PHF11        | NM_001040443 | 66.50965393 | 1.496709716 | 8.98E-07    | 44.43724338 |
| TTL3         | NM_001025930 | 63.91763382 | 4.88770716  | 3.18E-05    | 13.07722245 |
| LOC100505938 | NR_125740    | 103.1222656 | 0.515959057 | 7.56E-13    | 199.8652105 |
| GCN1L1       | NM_006836    | 129.3667968 | 2.105742054 | 4.08E-13    | 61.43525344 |
| KLHL11       | NM_018143    | 141.3256137 | 1.756172644 | 3.49E-17    | 80.47364488 |
| MBLAC2       | NM_203406    | 149.3667968 | 4.06167136  | 1.69E-15    | 36.77471257 |
| MRPL54       | NM_172251    | 81.59073644 | 6.986588798 | 7.49E-07    | 11.67819358 |
| AP3B1        | NM_003664    | 129.6319195 | 0.384778359 | 1.10E-14    | 336.9002352 |
| USP37        | NM_020935    | 118.2033481 | 1.196148131 | 7.47E-12    | 98.81999149 |
| SESTD1       | NM_178123    | 52.22393965 | 0.767294103 | 8.08E-06    | 68.06248014 |
| KCTD11       | NM_001002914 | 106.7747767 | 16.04055307 | 2.87E-06    | 6.656552066 |
| CASP6        | NM_001226    | 138.4684708 | 1.448975829 | 1.23E-16    | 95.56299568 |
| PAFAH1B1     | NM_000430    | 132.2239396 | 1.382344209 | 1.48E-13    | 95.65196485 |
| TIMP1        | NM_003254    | 43.1222656  | 5.640713288 | 0.003669503 | 7.644824935 |
| FDXACB1      | NR_038364    | 67.03989941 | 6.835263471 | 7.55E-05    | 9.807946643 |
| MYO15A       | NM_016239    | 38.99871632 | 2.850191242 | 0.00125842  | 13.68284196 |
| MED18        | NM_017638    | 66.77477667 | 5.967574794 | 2.31E-05    | 11.18960029 |
| FCHSD1       | NM_033449    | 95.61132799 | 4.747781143 | 2.59E-08    | 20.1381077  |
| SGCB         | NM_000232    | 74.55083703 | 1.33783192  | 1.47E-08    | 55.7251146  |
| LOC148413    | NR_015434    | 98.73359358 | 21.36306251 | 8.26E-05    | 4.62169661  |
| RPS9         | NM_001013    | 235.0810825 | 19.65433075 | 8.21E-17    | 11.96077778 |
| PHC1         | NM_004426    | 60          | 2.369244508 | 5.66E-06    | 25.32452847 |
| DOHH         | NM_031304    | 107.0398994 | 0.320181237 | 9.86E-17    | 334.3103434 |
| KCTD21       | NM_001029859 | 106.7747767 | 1.568317137 | 1.12E-12    | 68.08238854 |
| HSDL2        | NM_032303    | 49.89704227 | 0.890300638 | 1.32E-05    | 56.04516063 |
| ACTR1A       | NM_005736    | 102.3861047 | 6.924520018 | 2.05E-08    | 14.7860219  |
| C9orf43      | NM_152786    | 87.30502215 | 1.85872523  | 5.92E-10    | 46.97037558 |
| KLF3         | NM_016531    | 109.3667968 | 3.718945213 | 6.16E-10    | 29.40801505 |
| ZNF777       | NM_015694    | 117.9382254 | 1.321358047 | 1.44E-13    | 89.25531246 |
| ESYT2        | NM_020728    | 43.65251108 | 0.619317489 | 4.95E-05    | 70.48486733 |
| TMEM205      | NM_198536    | 47.57014489 | 5.513939708 | 0.00064112  | 8.62725155  |
| PMS2P3       | NR_028059    | 78.46847084 | 0.700752064 | 1.29E-09    | 111.9775094 |
| GMFB         | NM_004124    | 113.0193079 | 0.458521213 | 9.53E-17    | 246.4865414 |
| STAT5B       | NM_012448    | 71.69369417 | 0.37345961  | 4.33E-09    | 191.9717483 |
| MYL6         | NM_021019    | 152.2239396 | 30.51164619 | 3.57E-07    | 4.989043812 |
| DPY19L4      | NM_181787    | 236.1415735 | 0.234811748 | 2.91E-36    | 1005.66337  |
| PRPF8        | NM_006445    | 71.48777871 | 1.470317642 | 1.93E-07    | 48.62063588 |
| RUNDC1       | NM_173079    | 55.34620525 | 4.21305726  | 0.00012401  | 13.13682721 |
| EXOSC7       | NR_023353    | 92.75418513 | 2.733784893 | 2.95E-09    | 33.92885276 |
| ERI3         | NM_024066    | 103.3873883 | 2.199763414 | 6.63E-10    | 46.9993217  |
| SLC7A5P2     | NR_002594    | 273.5495533 | 29.59953495 | 6.08E-17    | 9.241684163 |
| USP14        | NM_005151    | 49.36679679 | 0.812313159 | 8.03E-06    | 60.77310975 |
| BRX1         | NM_018321    | 67.83526763 | 1.672264445 | 3.46E-08    | 40.56491653 |
| ARGLU1       | NM_018011    | 144.4478793 | 0.980123888 | 1.01E-18    | 147.3771644 |
| TRAM2-AS1    | NR_103447    | 126.5096539 | 2.00072065  | 4.55E-15    | 63.2320429  |
| SNRPD1       | NM_006938    | 118.2033481 | 4.98151063  | 2.01E-10    | 23.72841431 |
| PBX4         | NR_038198    | 61.06049096 | 2.870492689 | 1.16E-05    | 21.27178069 |
| WDFY3        | NM_014991    | 26.50965393 | 0.319214875 | 0.004844016 | 83.04642417 |
| SMIM8        | NM_001042493 | 183.9176338 | 0.762662083 | 5.48E-26    | 241.1521931 |
| PLEKHA3      | NM_019091    | 64.97812478 | 0.307041802 | 5.49E-10    | 211.6263141 |
| C5orf30      | NM_033211    | 189.8970423 | 2.218112376 | 8.61E-22    | 85.61200251 |
| ABRACL       | NM_021243    | 104.1827566 | 4.770309932 | 6.11E-10    | 21.8398297  |
| HIF1AN       | NM_017902    | 206.7747767 | 5.534297306 | 1.56E-20    | 37.36242656 |

|              |              |             |             |             |             |
|--------------|--------------|-------------|-------------|-------------|-------------|
| CLN8         | NM_018941    | 89.36679679 | 3.345623556 | 3.31E-08    | 26.71155176 |
| C17orf85     | NM_001114118 | 136.6718189 | 0.993957653 | 2.84E-16    | 137.5026577 |
| PKN2         | NM_006256    | 161.3256137 | 1.519121049 | 4.68E-16    | 106.1966812 |
| CCDC74B      | NM_207310    | 36.14157347 | 2.624315896 | 0.00285394  | 13.77180755 |
| MANBA        | NM_005908    | 172.4890624 | 0.914784744 | 1.08E-19    | 188.556995  |
| ZDHHC1       | NM_013304    | 76.14157347 | 2.712619519 | 5.38E-08    | 28.06938936 |
| LOC101928489 | NR_110889    | 61.59073644 | 7.908585873 | 0.000404354 | 7.787831785 |
| SELM         | NM_080430    | 198.2033481 | 15.55937233 | 1.22E-14    | 12.73851823 |
| SLC46A1      | NM_080669    | 149.6319195 | 6.817477228 | 2.28E-13    | 21.948283   |
| SEH1L        | NM_001013437 | 209.6319195 | 1.87400774  | 4.60E-24    | 111.8628888 |
| VPS41        | NM_014396    | 63.91763382 | 0.176779913 | 8.03E-08    | 361.566157  |
| PCSK5        | NM_001190482 | 158.9987163 | 0.340361898 | 7.25E-18    | 467.1460497 |
| PARD6G       | NM_032510    | 63.65251108 | 1.16508562  | 3.82E-07    | 54.63333338 |
| AP5Z1        | NM_014855    | 69.89704227 | 2.695239399 | 4.23E-07    | 25.93351904 |
| PGM2         | NM_018290    | 183.9176338 | 1.088710327 | 1.21E-22    | 168.9316517 |
| TIMMDC1      | NM_016589    | 121.5907364 | 2.242397935 | 1.20E-13    | 54.22353211 |
| LOC101926926 | NR_125388    | 26.77477667 | 0.461690877 | 0.002928124 | 57.9928649  |
| PPP6C        | NM_001123369 | 87.03989941 | 1.300917374 | 4.58E-09    | 66.90655465 |
| TRIP4        | NM_016213    | 141.3256137 | 0.791264744 | 5.54E-16    | 178.6072421 |
| IGF2BP2      | NM_001291869 | 114.550837  | 2.247361441 | 5.88E-11    | 50.97125675 |
| PRRC2C       | NM_015172    | 101.5907364 | 1.435466251 | 3.22E-10    | 70.77194353 |
| ADORA2B      | NM_000676    | 67.30502215 | 8.507567655 | 5.77E-05    | 7.911194466 |
| HSPA4        | NM_002154    | 133.2844306 | 3.262712478 | 1.47E-13    | 40.85080481 |
| C14orf132    | NM_001282463 | 109.3667968 | 1.510068077 | 2.08E-11    | 72.42507704 |
| H2AFX        | NM_002105    | 207.3050222 | 47.10205819 | 1.03E-07    | 4.401188189 |
| CYSTM1       | NM_032412    | 84.4478793  | 2.394925466 | 2.40E-08    | 35.26117221 |
| LOC100506314 | NR_038920    | 26.24453119 | 0.75531946  | 0.004125752 | 34.74626641 |
| CSTF2        | NM_001325    | 43.38738834 | 0.256829864 | 1.57E-06    | 168.9343588 |
| GINS2        | NM_016095    | 81.59073644 | 1.180226315 | 1.38E-10    | 69.13143301 |
| FGD6         | NM_018351    | 143.3873883 | 0.657358216 | 1.10E-16    | 218.126715  |
| PP7080       | NR_024158    | 152.2239396 | 9.78324371  | 2.41E-12    | 15.55965937 |
| CUL1         | NM_003592    | 109.1016741 | 1.869577179 | 1.05E-10    | 58.356336   |
| ATP6V1H      | NM_015941    | 73.54955335 | 0.743590338 | 1.69E-08    | 98.9113892  |
| FUBP1        | NM_003902    | 56.40669621 | 2.353614805 | 1.36E-05    | 23.96598461 |
| MLH3         | NM_001040108 | 67.57014489 | 1.508748813 | 5.19E-07    | 44.78554967 |
| ZNF468       | NR_102299    | 81.85585918 | 1.582335283 | 2.16E-09    | 51.73104591 |
| DEPTOR       | NM_001283012 | 71.69369417 | 0.765062249 | 5.19E-08    | 93.70962206 |
| FKBP4        | NM_002014    | 178.4684708 | 7.769310071 | 7.74E-16    | 22.97095485 |
| HSBP1L1      | NM_001136180 | 75.87645073 | 18.06215466 | 0.000570953 | 4.200852676 |
| RAB3GAP2     | NM_012414    | 89.89704227 | 1.125900443 | 6.51E-10    | 79.84457488 |
| RTCA-AS1     | NR_110435    | 115.0810825 | 17.99573484 | 6.04E-06    | 6.394908768 |
| SF3B3        | NM_012426    | 87.30502215 | 5.644823841 | 1.56E-07    | 15.4663856  |
| TOB2         | NM_016272    | 211.9588169 | 14.65899031 | 2.63E-16    | 14.45930534 |
| CCNL2        | NM_030937    | 123.9176338 | 5.143526076 | 2.22E-11    | 24.09196182 |
| ANKRD18DP    | NR_003291    | 87.03989941 | 1.23107757  | 7.22E-10    | 70.70220555 |
| LOC729732    | NR_047662    | 84.97812478 | 1.092862348 | 1.36E-09    | 77.75739087 |
| SLC37A3      | NM_001287498 | 106.5096539 | 1.063991822 | 2.89E-11    | 100.1038276 |
| CAMLG        | NM_001745    | 132.2239396 | 3.757054793 | 6.95E-14    | 35.19350846 |
| SDE2         | NM_152608    | 102.6512274 | 1.930527233 | 5.46E-12    | 53.17263889 |
| ALKBH3       | NM_139178    | 96.67181894 | 0.736032015 | 2.27E-11    | 131.341867  |
| LOC100093631 | NR_003580    | 54.81595977 | 2.770771302 | 4.25E-05    | 19.78364642 |
| UMPS         | NR_033434    | 151.222656  | 3.233193306 | 4.68E-16    | 46.77191918 |
| TEN1-CDK3    | NR_037709    | 70.69241049 | 6.341383381 | 2.56E-05    | 11.14779004 |
| NSMCE4A      | NM_001167865 | 168.3655131 | 5.133976128 | 2.90E-16    | 32.79437008 |
| CNNM3        | NM_017623    | 166.2445312 | 5.194176599 | 8.38E-16    | 32.00594512 |
| TRAF1        | NM_001190945 | 58.99871632 | 0.425650573 | 1.61E-08    | 138.6083329 |
| PSMD14       | NM_005805    | 134.8159598 | 0.793100238 | 8.15E-16    | 169.9860287 |
| SNRNP48      | NM_152551    | 150.4272878 | 1.206867947 | 2.51E-19    | 124.6427069 |
| RPL10A       | NM_007104    | 181.8558592 | 39.27451722 | 8.94E-08    | 4.630377967 |
| FTX          | NR_028379    | 100.5302455 | 0.710859575 | 5.08E-11    | 141.4206814 |
| DDX56        | NM_001257189 | 115.0810825 | 15.66797704 | 4.11E-07    | 7.344986669 |
| IFI30        | NM_006332    | 187.0398994 | 9.646592429 | 1.86E-16    | 19.38921964 |
| TOMM7        | NM_019059    | 86.24453119 | 2.587821601 | 5.51E-09    | 33.32707755 |
| PDP1         | NM_001161779 | 137.4079799 | 21.46485246 | 6.04E-08    | 6.401533863 |

|              |              |             |             |             |             |
|--------------|--------------|-------------|-------------|-------------|-------------|
| DAPK3        | NM_001348    | 118.4684708 | 3.888805963 | 3.82E-12    | 30.46397068 |
| CLN5         | NM_006493    | 180.5302455 | 7.103316091 | 3.19E-17    | 25.41492497 |
| DENND6B      | NM_001001794 | 37.40797988 | 0.749788944 | 0.000413933 | 49.89134636 |
| TRAK2        | NM_015049    | 98.2033481  | 0.291044243 | 3.99E-13    | 337.4172504 |
| LOC100507002 | NR_110801    | 62.12098192 | 2.849636975 | 5.47E-06    | 21.79961253 |
| TPR          | NM_003292    | 130.4272878 | 0.901328693 | 9.90E-15    | 144.7055761 |
| PRRG4        | NM_024081    | 129.6319195 | 0.91353337  | 4.27E-16    | 141.9016796 |
| MRPS7        | NM_015971    | 133.5495533 | 5.650663353 | 4.37E-13    | 23.63431424 |
| ZBTB47       | NM_145166    | 40.53024548 | 3.598835218 | 0.00341678  | 11.26204536 |
| LOC100129973 | NR_102751    | 58.2033481  | 1.001876645 | 3.60E-06    | 58.09432567 |
| AATF         | NM_012138    | 107.3050222 | 1.215535475 | 5.75E-11    | 88.27798477 |
| CYTH2        | NM_004228    | 69.10167405 | 12.20444445 | 0.00051687  | 5.662008976 |
| KNTC1        | NM_014708    | 93.01930787 | 1.444617012 | 2.46E-09    | 64.39028968 |
| YTHDF3-AS1   | NR_102684    | 169.6319195 | 30.33465399 | 1.94E-05    | 5.592017618 |
| POLB         | NM_002690    | 135.8764507 | 0.977453938 | 9.77E-17    | 139.0105922 |
| C9orf163     | NM_152571    | 106.5096539 | 23.75412618 | 7.91E-05    | 4.483838013 |
| DTX3L        | NM_138287    | 76.93694168 | 3.605055586 | 1.82E-07    | 21.34140233 |
| WDR37        | NM_014023    | 62.85714286 | 0.016710884 | 2.31E-11    | 3761.449315 |
| ECHDC2       | NM_001198962 | 97.93822536 | 0.273542806 | 6.77E-14    | 358.0361946 |
| ZNF780B      | NM_001005851 | 64.4478793  | 0.630612468 | 1.03E-07    | 102.1988662 |
| RNF149       | NM_173647    | 138.7335936 | 1.931578323 | 1.24E-15    | 71.82395449 |
| GXYLT1       | NM_173601    | 160.5302455 | 0.092123892 | 2.16E-26    | 1742.547373 |
| C7orf73      | NM_001130929 | 213.0193079 | 2.621459086 | 4.89E-25    | 81.25982549 |
| PYROXD1      | NM_024854    | 100         | 0.832383562 | 8.06E-12    | 120.1369231 |
| CKAP2L       | NM_152515    | 50.16216501 | 1.219633263 | 2.53E-05    | 41.12889221 |
| FANCE        | NM_021922    | 118.2033481 | 3.228599474 | 3.53E-12    | 36.61133846 |
| SHCBP1       | NM_024745    | 95.34620525 | 0.249542056 | 4.01E-14    | 382.0847141 |
| TTF2         | NM_003594    | 58.46847084 | 2.140691842 | 1.62E-05    | 27.31288534 |
| ELMSAN1      | NM_001043318 | 49.10167405 | 4.165107451 | 0.000963748 | 11.78881328 |
| LINC00476    | NR_023389    | 132.7541851 | 15.03868213 | 1.04E-08    | 8.827514536 |
| ZNF184       | NM_007149    | 69.63191953 | 1.433746365 | 1.86E-07    | 48.566414   |
| A3GALT2      | NM_001080438 | 32.75418513 | 0.631955244 | 0.000238767 | 51.8299127  |
| MAML3        | NM_018717    | 47.83526763 | 0.389643706 | 1.89E-05    | 122.7666889 |
| PELI1        | NM_020651    | 115.3462052 | 1.58391799  | 4.42E-12    | 72.82334437 |
| RAB6B        | NM_016577    | 123.6525111 | 1.175161542 | 4.51E-13    | 105.2217135 |
| CDC37        | NM_007065    | 139.2638391 | 4.59361914  | 8.71E-14    | 30.31680137 |
| ANKRD34A     | NM_001039888 | 129.8970423 | 0.611587502 | 1.74E-18    | 212.3932255 |
| PDIA3        | NM_005313    | 202.1209819 | 2.641274728 | 2.51E-22    | 76.52402825 |
| SAP30L       | NM_001131063 | 72.22393965 | 3.249114926 | 1.36E-06    | 22.22880424 |
| TMEM242      | NM_018452    | 54.07979883 | 4.14401317  | 0.000232603 | 13.05010303 |
| C6orf106     | NM_022758    | 41.3256137  | 1.779204891 | 0.001249587 | 23.2270122  |
| VPS9D1-AS1   | NR_036480    | 228.3655131 | 18.34036037 | 3.15E-17    | 12.45152813 |
| FBXO5        | NM_012177    | 68.36551311 | 2.802837158 | 1.59E-06    | 24.39153945 |
| ZNF503       | NR_120651    | 92.75418513 | 3.456104321 | 1.21E-08    | 26.83778512 |
| NUP98        | NM_005387    | 69.63191953 | 2.85004504  | 1.90E-06    | 24.43186636 |
| PREB         | NM_013388    | 132.7541851 | 5.43554617  | 1.94E-12    | 24.4233387  |
| FAM133DP     | NR_034169    | 189.6319195 | 1.21222051  | 7.61E-24    | 156.4335184 |
| TIMM10B      | NM_012192    | 118.7335936 | 2.937602386 | 2.84E-13    | 40.41853797 |
| IRF9         | NM_006084    | 62.12098192 | 7.223972116 | 0.00015782  | 8.599283182 |
| N4BP2        | NM_018177    | 115.3462052 | 0.29810274  | 5.21E-15    | 386.9344009 |
| MFAP1        | NM_005926    | 116.1415735 | 2.373245816 | 3.53E-12    | 48.93786084 |
| CLPP         | NM_006012    | 50.42728775 | 8.575313725 | 0.003293699 | 5.880518121 |
| MTM1         | NM_000252    | 75.08108251 | 0.422729407 | 4.72E-09    | 177.6102662 |
| CCT6P3       | NR_033416    | 151.6936942 | 2.925986881 | 5.41E-15    | 51.84360024 |
| NUDC         | NM_006600    | 112.4890624 | 5.693888623 | 2.23E-09    | 19.75610516 |
| SLC9A1       | NM_003047    | 241.8558592 | 2.354733818 | 1.47E-26    | 102.7104879 |
| LOC102723373 | NR_119378    | 46.77477667 | 0.127139667 | 5.31E-07    | 367.9007318 |
| C3orf38      | NM_173824    | 127.3050222 | 5.761126982 | 6.84E-12    | 22.09724288 |
| MSX1         | NM_002448    | 146.5096539 | 14.59627692 | 3.93E-10    | 10.03746741 |
| BUD13        | NM_032725    | 103.9176338 | 1.481265403 | 8.42E-12    | 70.1546351  |
| ME1          | NM_002395    | 71.95881691 | 0.119567006 | 3.29E-09    | 601.8283755 |
| C15orf61     | NM_001143936 | 207.8352676 | 7.963661544 | 1.24E-19    | 26.09795337 |
| IFI6         | NM_002038    | 89.89704227 | 4.169978498 | 1.24E-08    | 21.55815487 |
| NHP2L1       | NM_001003796 | 153.0193079 | 6.058124903 | 1.21E-14    | 25.25852641 |



|           |              |             |             |             |             |
|-----------|--------------|-------------|-------------|-------------|-------------|
| PRPF19    | NM_014502    | 125.2432475 | 3.037688084 | 3.11E-13    | 41.22979189 |
| C5orf24   | NM_001135586 | 223.9176338 | 3.562062204 | 4.05E-25    | 62.86179774 |
| CCNF      | NM_001761    | 95.61132799 | 7.391658504 | 1.97E-07    | 12.93503047 |
| ALDH1A3   | NM_001293815 | 121.3256137 | 6.985826772 | 6.96E-10    | 17.36739511 |
| THAP7     | NM_030573    | 158.4684708 | 37.00352562 | 2.19E-06    | 4.282523575 |
| PCYOX1    | NM_016297    | 200.7953682 | 2.907034356 | 4.81E-22    | 69.07223776 |
| GCHFR     | NM_005258    | 43.1222656  | 2.631738862 | 0.000291394 | 16.38546522 |
| SRBD1     | NM_018079    | 95.87645073 | 0.213724046 | 6.60E-12    | 448.5992689 |
| RSL1D1    | NM_015659    | 107.0398994 | 5.818133726 | 4.74E-09    | 18.39763478 |
| GHDC      | NM_032484    | 45.773493   | 2.180199854 | 0.000165225 | 20.99509038 |
| YIPF2     | NM_024029    | 54.55083703 | 5.436705804 | 0.000292545 | 10.03380337 |
| BCAM      | NM_001013257 | 135.3462052 | 7.632489195 | 1.78E-11    | 17.73290493 |
| TNFRSF1A  | NM_001065    | 91.95881691 | 17.80534987 | 6.50E-05    | 5.164673404 |
| KCNN4     | NM_002250    | 68.83655131 | 5.863790512 | 2.89E-05    | 11.73925828 |
| FAM73B    | NM_032809    | 26.24453119 | 0.779869709 | 0.003332421 | 33.65245616 |
| PSEN2     | NM_000447    | 132.7541851 | 2.893804084 | 3.12E-13    | 45.87531888 |
| SCAF8     | NM_014892    | 80.79536822 | 1.984525891 | 1.13E-07    | 40.71268034 |
| PRR19     | NM_199285    | 112.2239396 | 5.752601424 | 1.55E-10    | 19.50838088 |
| C19orf66  | NM_018381    | 81.85585918 | 5.475134317 | 2.12E-07    | 14.95047508 |
| TMEM45A   | NM_018004    | 47.57014489 | 0.593236959 | 8.90E-06    | 80.18742629 |
| IL12A     | NM_000882    | 75.87645073 | 1.132443492 | 2.04E-09    | 67.0024167  |
| SLC4A1AP  | NM_018158    | 165.9794085 | 2.090759224 | 7.42E-19    | 79.38714633 |
| PAPSS2    | NM_001015880 | 66.77477667 | 0.596540743 | 7.65E-08    | 111.9366572 |
| PCF11     | NM_015885    | 116.4066962 | 4.284182144 | 5.73E-11    | 27.17127617 |
| GSTCD     | NM_024751    | 120.5302455 | 0.062460873 | 1.40E-18    | 1929.691967 |
| KBTBD7    | NM_032138    | 87.30502215 | 4.785054525 | 4.65E-08    | 18.24535576 |
| C1QL4     | NM_001008223 | 104.1827566 | 4.454937782 | 4.84E-10    | 23.38590608 |
| ASS1      | NM_000050    | 40.26512274 | 1.10916049  | 0.000106905 | 36.30234136 |
| ZDHHC5    | NM_015457    | 147.0398994 | 2.260103149 | 4.77E-16    | 65.05893303 |
| SMG9      | NM_019108    | 129.3667968 | 4.367157826 | 2.03E-12    | 29.62265207 |
| LCOR      | NM_032440    | 32.22393965 | 1.181461427 | 0.001279722 | 27.27464386 |
| JUP       | NM_021991    | 193.2844306 | 3.840210852 | 1.02E-19    | 50.33172346 |
| DDX60L    | NM_001012967 | 67.03989941 | 1.542730137 | 3.27E-06    | 43.45536385 |
| SNX8      | NM_013321    | 77.40797988 | 0.611287258 | 1.43E-09    | 126.6311032 |
| SDHA      | NM_001294332 | 78.2033481  | 2.442754507 | 1.09E-07    | 32.01441156 |
| RPL23     | NM_000978    | 154.8159598 | 10.94022581 | 6.13E-12    | 14.15107534 |
| CCDC88A   | NM_001254943 | 108.8365513 | 0.098419013 | 6.65E-16    | 1105.848837 |
| PEX12     | NM_000286    | 106.7747767 | 15.93847036 | 1.67E-06    | 6.699185947 |
| BNIP3L    | NM_004331    | 75.87645073 | 0.599192281 | 2.89E-09    | 126.631222  |
| MPLKIP    | NM_138701    | 155.611328  | 7.70161242  | 7.10E-13    | 20.20503233 |
| MYO5B     | NM_001080467 | 81.59073644 | 0.369756563 | 2.82E-09    | 220.6606846 |
| TBCE      | NM_001287801 | 138.2033481 | 1.09356349  | 1.10E-14    | 126.3788974 |
| RIC1      | NM_001206557 | 204.1827566 | 0.890340421 | 2.94E-23    | 229.3311095 |
| PIGZ      | NM_025163    | 114.8159598 | 2.444325976 | 1.19E-12    | 46.97244184 |
| BDP1      | NM_018429    | 121.8558592 | 0.877379014 | 3.56E-14    | 138.886225  |
| GLOD4     | NM_016080    | 127.3050222 | 2.118042837 | 1.10E-14    | 60.10502713 |
| GADD45A   | NM_001924    | 163.3873883 | 26.0993615  | 6.25E-09    | 6.260206339 |
| RND1      | NM_014470    | 124.1827566 | 2.329082344 | 1.13E-13    | 53.31831951 |
| UBE2V2    | NM_003350    | 117.9382254 | 1.712915028 | 2.72E-12    | 68.85235019 |
| EPB41L5   | NM_001184937 | 105.2432475 | 0.365468703 | 1.10E-12    | 287.96788   |
| PPIL3     | NM_130906    | 97.67310262 | 0.416624303 | 6.77E-14    | 234.4392826 |
| RAPGEF5   | NM_012294    | 31.69369417 | 0.636149412 | 0.001275714 | 49.82114827 |
| NOMO1     | NM_014287    | 138.7335936 | 2.376675884 | 2.43E-14    | 58.37295464 |
| WDR89     | NM_080666    | 121.5907364 | 1.439758008 | 1.83E-13    | 84.45220362 |
| STK11IP   | NM_052902    | 44.71300204 | 2.614522231 | 0.000176498 | 17.1017869  |
| PRKG1-AS1 | NR_038277    | 47.30502215 | 1.109945432 | 2.75E-05    | 42.61923225 |
| EXOG      | NM_001145464 | 118.2033481 | 1.088124318 | 6.05E-14    | 108.6303708 |
| DNAJA1    | NM_001539    | 198.7335936 | 6.648308844 | 4.18E-19    | 29.89235281 |
| ARPC3     | NM_001287222 | 75.61132799 | 4.410042199 | 1.08E-06    | 17.14526178 |
| RNF144B   | NM_182757    | 100.7953682 | 0.244293224 | 1.02E-13    | 412.5999352 |
| BLOC1S6   | NM_012388    | 177.9382254 | 2.220629638 | 6.49E-20    | 80.12962736 |
| ZC3H15    | NM_018471    | 75.34620525 | 3.084943881 | 1.56E-07    | 24.42384956 |
| TM7SF3    | NM_016551    | 145.9794085 | 1.390167714 | 1.67E-16    | 105.0084871 |
| LLPH      | NM_032338    | 109.8970423 | 9.429813812 | 2.86E-08    | 11.65421126 |

|                |              |             |             |             |             |
|----------------|--------------|-------------|-------------|-------------|-------------|
| XRCC1          | NM_006297    | 67.03989941 | 0.132998237 | 1.14E-10    | 504.0660757 |
| RAPH1          | NM_203365    | 72.48906239 | 0.371074659 | 6.74E-09    | 195.3489969 |
| MRPL16         | NM_017840    | 130.9575332 | 12.68164889 | 8.43E-10    | 10.32653832 |
| KLHL23         | NM_144711    | 100.5302455 | 0.140164678 | 3.13E-16    | 717.2295265 |
| HYOU1          | NM_006389    | 115.0810825 | 4.405457666 | 1.16E-10    | 26.12238983 |
| LOC100506746   | NR_038841    | 38.73359358 | 1.938953826 | 0.000339663 | 19.97654254 |
| TFB1M          | NM_016020    | 138.2033481 | 1.11141224  | 3.22E-15    | 124.3493126 |
| CIR1           | NM_004882    | 44.4478793  | 0.021463829 | 3.78E-08    | 2070.82715  |
| NUP133         | NM_018230    | 135.3462052 | 1.386069595 | 2.78E-14    | 97.64748159 |
| C5orf22        | NM_018356    | 123.6525111 | 1.690492468 | 2.20E-14    | 73.14585153 |
| CLOCK          | NM_004898    | 131.9588169 | 2.061544341 | 5.72E-13    | 64.00969133 |
| RBM12B         | NM_203390    | 167.3050222 | 7.891631895 | 5.34E-15    | 21.20030741 |
| TNFSF9         | NM_003811    | 193.8146761 | 10.40736296 | 6.36E-17    | 18.622842   |
| FAM207A        | NM_058190    | 79.26383906 | 1.401879027 | 1.85E-08    | 56.54114053 |
| ACSL3          | NM_004457    | 149.8970423 | 0.834383319 | 1.41E-16    | 179.6500947 |
| BAG4           | NM_001204878 | 98.99871632 | 3.030624155 | 3.81E-10    | 32.66611472 |
| KPNA1          | NM_002264    | 161.5907364 | 0.917873673 | 6.82E-18    | 176.0489937 |
| AZIN2          | NM_052998    | 95.08108251 | 1.338917044 | 3.39E-10    | 71.01342306 |
| TBC1D25        | NM_002536    | 94.55083703 | 0.984413099 | 2.03E-11    | 96.04792652 |
| HMOX1          | NM_002133    | 118.4684708 | 2.0263454   | 2.84E-13    | 58.4641053  |
| APOPT1         | NM_032374    | 58.73359358 | 0.670437584 | 8.28E-07    | 87.60486436 |
| MMD            | NM_012329    | 173.5495533 | 0.522591634 | 1.39E-24    | 332.094014  |
| MIB1           | NM_020774    | 32.22393965 | 0.199933198 | 0.000651647 | 161.1735316 |
| C2orf44        | NM_025203    | 141.3256137 | 1.892754767 | 7.64E-16    | 74.66662675 |
| WIPF2          | NM_133264    | 84.97812478 | 1.288175805 | 9.36E-09    | 65.96780071 |
| HPS6           | NM_024747    | 147.5701449 | 9.900794846 | 9.18E-12    | 14.90487857 |
| MYL9           | NM_006097    | 106.2445312 | 3.697292965 | 1.52E-10    | 28.73576214 |
| C9orf142       | NM_183241    | 120.7953682 | 13.97255986 | 3.65E-07    | 8.645185237 |
| SAT1           | NM_002970    | 94.55083703 | 14.25411101 | 1.06E-05    | 6.633232825 |
| FAM206A        | NM_017832    | 71.95881691 | 5.210671767 | 3.73E-06    | 13.80989249 |
| ATP5H          | NM_006356    | 176.1415735 | 10.16178272 | 4.72E-15    | 17.33372759 |
| FAM118B        | NM_024556    | 167.8352676 | 2.591170137 | 9.41E-18    | 64.77199826 |
| DUSP12         | NM_007240    | 162.6512274 | 3.849120103 | 1.11E-17    | 42.2567296  |
| SCRIB          | NM_015356    | 40.79536822 | 1.712643608 | 0.000679953 | 23.8201153  |
| CDKAL1         | NM_017774    | 63.91763382 | 0.095496546 | 2.40E-07    | 669.3188038 |
| LOC101929567   | NR_110257    | 100.7953682 | 0.721705122 | 1.05E-12    | 139.6628141 |
| FAM72D         | NM_207418    | 42.38610466 | 3.66879111  | 0.001991629 | 11.5531529  |
| UBTD2          | NM_152277    | 140.2651227 | 0.980140944 | 2.18E-15    | 143.1070946 |
| RANBP9         | NM_005493    | 49.10167405 | 1.243063259 | 0.000146591 | 39.50054329 |
| MYO1E          | NM_004998    | 155.8764507 | 1.607659425 | 2.43E-15    | 96.95862714 |
| HABP4          | NM_014282    | 135.0810825 | 1.855882856 | 1.37E-14    | 72.7853496  |
| FAM195A        | NM_138418    | 71.42857143 | 11.26446697 | 0.000164031 | 6.341052057 |
| BLOC1S5-TXNDC5 | NR_037616    | 80.53024548 | 0.612188222 | 4.61E-09    | 131.5449115 |
| COPG1          | NM_016128    | 123.9176338 | 2.868736233 | 4.40E-12    | 43.19589664 |
| NCAPH2         | NM_014551    | 86.24453119 | 1.311940288 | 8.64E-11    | 65.73815287 |
| SIMC1          | NM_198567    | 83.91763382 | 0.37664729  | 2.89E-10    | 222.8016399 |
| SIX1           | NM_005982    | 49.63191953 | 5.489244946 | 0.000909672 | 9.041666025 |
| PLEKHN1        | NM_001160184 | 116.4066962 | 6.766248403 | 3.33E-10    | 17.20402345 |
| UBE2O          | NM_022066    | 152.7541851 | 2.423813919 | 1.43E-15    | 63.02224109 |
| COL4A3BP       | NM_001130105 | 29.89704227 | 0.850915697 | 0.00248492  | 35.13514014 |
| FAM117B        | NM_173511    | 103.3873883 | 0.271796845 | 4.29E-13    | 380.3847987 |
| TMED2          | NM_006815    | 151.9588169 | 2.883331478 | 3.87E-17    | 52.70251376 |
| SRGAP3         | NM_014850    | 93.01930787 | 0.015955903 | 1.12E-15    | 5829.773989 |
| LOC100506023   | NR_037845    | 94.81595977 | 0.280728653 | 3.84E-11    | 337.7494912 |
| TPIIP2         | NR_002187    | 140.7953682 | 8.02043486  | 3.57E-11    | 17.55458035 |
| SLC35A5        | NM_017945    | 83.91763382 | 2.904121226 | 1.32E-08    | 28.89605057 |
| PKP2           | NM_004572    | 154.550837  | 0.075130781 | 1.15E-24    | 2057.09079  |
| MLXIP          | NM_014938    | 120.7953682 | 0.731567903 | 4.96E-14    | 165.1184637 |
| CERS5          | NM_147190    | 49.10167405 | 1.55464814  | 1.00E-04    | 31.58378593 |
| TMEM14A        | NM_014051    | 168.1003904 | 1.306992697 | 1.83E-21    | 128.6161666 |
| LOC101927415   | NR_110049    | 44.97812478 | 6.799810218 | 0.004745339 | 6.614614722 |
| PLCG1          | NM_002660    | 80.53024548 | 3.383777077 | 7.61E-08    | 23.79892163 |
| DDX11-AS1      | NR_038927    | 89.36679679 | 1.265724717 | 3.05E-09    | 70.60523953 |
| EDEM3          | NM_025191    | 134.550837  | 0.969316956 | 6.09E-15    | 138.8099489 |

|              |              |             |             |             |             |
|--------------|--------------|-------------|-------------|-------------|-------------|
| CYP2R1       | NM_024514    | 120.5302455 | 5.813940683 | 7.63E-11    | 20.73124788 |
| CFDP1        | NM_006324    | 121.060491  | 1.417529312 | 6.67E-12    | 85.40246042 |
| DHRS7B       | NM_015510    | 116.4066962 | 0.966330377 | 8.91E-13    | 120.4626275 |
| NUDT19       | NM_001105570 | 99.5289618  | 3.537381806 | 1.71E-09    | 28.13633565 |
| MCCC2        | NM_022132    | 148.8365513 | 0.825095864 | 7.24E-17    | 180.3869801 |
| MOSPD2       | NM_152581    | 34.81595977 | 0.685057571 | 0.000341049 | 50.82194732 |
| CD9          | NM_001769    | 109.3667968 | 4.211998087 | 7.70E-10    | 25.9655381  |
| FAM168B      | NM_001009993 | 155.0810825 | 2.724423462 | 3.26E-16    | 56.9225323  |
| PAPD5        | NM_001040284 | 177.9382254 | 0.611075817 | 1.50E-22    | 291.188459  |
| GNAI1        | NM_002069    | 140.7953682 | 2.404295748 | 5.02E-14    | 58.55992066 |
| PSMB4        | NM_002796    | 90.42728775 | 10.09044147 | 4.71E-06    | 8.961678045 |
| GALK1        | NM_000154    | 136.9369417 | 11.80359095 | 1.64E-10    | 11.60129509 |
| OTULIN       | NM_138348    | 154.550837  | 0.754048636 | 9.33E-20    | 204.961364  |
| MTERF2       | NM_001033050 | 135.8764507 | 5.092844203 | 1.09E-13    | 26.67987579 |
| USH1C        | NM_153676    | 137.6731026 | 2.954690144 | 5.03E-14    | 46.59476828 |
| MED10        | NM_032286    | 75.34620525 | 2.9063367   | 6.55E-08    | 25.9248026  |
| PIPF         | NM_005729    | 103.9176338 | 3.895574629 | 3.18E-10    | 26.67581646 |
| RIPK4        | NM_020639    | 160.5302455 | 2.797394845 | 1.33E-16    | 57.38562283 |
| ACVR1        | NM_001111067 | 29.36679679 | 1.256481117 | 0.002619399 | 23.37225478 |
| NEIL3        | NM_018248    | 123.6525111 | 0.736559338 | 2.47E-14    | 167.8785466 |
| RBM26-AS1    | NR_038991    | 81.85585918 | 1.67467897  | 2.16E-09    | 48.8785377  |
| RAVER1       | NM_133452    | 81.06049096 | 4.981076524 | 3.57E-07    | 16.27368915 |
| PHGDH        | NM_006623    | 38.46847084 | 2.24389857  | 0.001841839 | 17.14358722 |
| DVL3         | NM_004423    | 29.10167405 | 0.698467324 | 0.000823879 | 41.66504722 |
| TBC1D8B      | NM_198881    | 63.38738834 | 0.01500155  | 2.31E-11    | 4225.389226 |
| 5-Mar        | NM_017824    | 110.6924105 | 1.639326797 | 1.65E-11    | 67.52308977 |
| INPP5B       | NM_001297434 | 97.93822536 | 0.314364067 | 3.99E-13    | 311.5439574 |
| MAD2L1       | NM_002358    | 76.14157347 | 2.909050106 | 4.12E-08    | 26.174033   |
| TOP2A        | NM_001067    | 98.73359358 | 0.947542103 | 8.06E-12    | 104.1996902 |
| SYDE2        | NM_032184    | 38.2033481  | 1.679589933 | 0.001841839 | 22.74564009 |
| FAM212B-AS1  | NR_038952    | 36.67181894 | 1.473069857 | 0.000413933 | 24.89482679 |
| CMC2         | NM_020188    | 178.4684708 | 0.873820143 | 4.88E-23    | 204.2393647 |
| LOC389906    | NR_034031    | 120.2651227 | 3.967263081 | 1.88E-11    | 30.31438054 |
| THAP9        | NM_024672    | 104.713002  | 3.32002374  | 2.41E-10    | 31.53983532 |
| DERL2        | NM_016041    | 63.65251108 | 1.242795217 | 1.62E-07    | 51.21721601 |
| NDFIP1       | NM_030571    | 150.162165  | 0.449638248 | 4.33E-20    | 333.9621699 |
| TRIM24       | NM_003852    | 135.0810825 | 0.411377867 | 1.09E-16    | 328.3625428 |
| AAAS         | NM_001173466 | 115.3462052 | 2.955726214 | 4.84E-12    | 39.0246582  |
| P4HTM        | NM_177938    | 89.63191953 | 10.26133813 | 2.67E-06    | 8.734915311 |
| LOC100506022 | NR_104622    | 61.3256137  | 9.153074594 | 0.000877542 | 6.700001521 |
| VPS37A       | NM_152415    | 149.8970423 | 1.700444751 | 4.01E-16    | 88.15166868 |
| MCIDAS       | NM_001190787 | 78.73359358 | 6.480586065 | 7.97E-07    | 12.14914713 |
| C2orf15      | NM_144706    | 43.91763382 | 2.935776569 | 0.001166714 | 14.95946057 |
| PIGF         | NM_002643    | 95.34620525 | 2.391021604 | 1.05E-09    | 39.87676444 |
| DHX9         | NM_001357    | 141.060491  | 2.618010993 | 1.59E-14    | 53.88078635 |
| DPAGT1       | NM_001382    | 55.08108251 | 9.806869422 | 0.001628033 | 5.616581616 |
| AP2B1        | NM_001282    | 101.060491  | 0.611740403 | 1.31E-11    | 165.2015961 |
| KLHL42       | NM_020782    | 72.75418513 | 0.256418095 | 3.80E-11    | 283.7326483 |
| SPINT2       | NM_001166103 | 138.4684708 | 4.083713186 | 2.90E-13    | 33.90749167 |
| MRPL13       | NM_014078    | 244.1827566 | 0.980104762 | 1.90E-30    | 249.1394451 |
| NCAPD2       | NM_014865    | 61.59073644 | 3.155195417 | 4.84E-06    | 19.52041896 |
| TIAL1        | NM_001033925 | 196.4066962 | 2.591287879 | 5.79E-22    | 75.79501211 |
| METTL3       | NM_019852    | 133.2844306 | 5.880593039 | 1.43E-12    | 22.66513423 |
| EPHB4        | NM_004444    | 54.81595977 | 2.081545061 | 2.01E-05    | 26.33426524 |
| APC          | NM_001127511 | 126.7747767 | 0.757750305 | 1.98E-14    | 167.3041578 |
| FAU          | NM_001997    | 92.75418513 | 19.87360678 | 0.00035245  | 4.667204407 |
| CETN4P       | NR_024041    | 47.30502215 | 2.183393309 | 5.57E-05    | 21.6658272  |
| RAB14        | NM_016322    | 35.61132799 | 2.119918482 | 0.003131679 | 16.79844215 |
| CTCF         | NM_001191022 | 43.91763382 | 1.677973759 | 0.000590202 | 26.17301586 |
| KDM5B        | NM_006618    | 84.71300204 | 0.872564303 | 4.58E-10    | 97.08511075 |
| CTSO         | NM_001334    | 72.48906239 | 1.173054968 | 9.73E-08    | 61.79511137 |
| ICAM5        | NM_003259    | 92.75418513 | 17.21609502 | 3.64E-05    | 5.387643658 |
| ABT1         | NM_013375    | 60.05920728 | 6.238563753 | 0.000111218 | 9.627088807 |
| TP53BP2      | NM_001031685 | 60.79536822 | 1.134636393 | 6.76E-06    | 53.58136632 |

|                        |              |             |             |             |             |
|------------------------|--------------|-------------|-------------|-------------|-------------|
| WHAMMP2                | NR_026589    | 78.46847084 | 1.338133268 | 9.34E-09    | 58.64025111 |
| SNED1                  | NM_001080437 | 34.55083703 | 0.437254593 | 0.000397555 | 79.01766513 |
| IPMK                   | NM_152230    | 78.73359358 | 0.60089788  | 9.54E-10    | 131.0265791 |
| C9orf40                | NM_017998    | 124.1827566 | 7.374392156 | 1.62E-10    | 16.83972779 |
| TMEM54                 | NM_033504    | 58.2033481  | 1.844219306 | 5.52E-06    | 31.55988439 |
| CDCP1                  | NM_022842    | 156.4066962 | 4.114602678 | 1.58E-14    | 38.01258796 |
| SAAL1                  | NM_138421    | 90.42728775 | 2.640609861 | 1.39E-09    | 34.24484968 |
| HSD17B12               | NM_016142    | 101.3256137 | 0.465842441 | 1.21E-11    | 217.5104817 |
| TM9SF3                 | NM_020123    | 123.3873883 | 1.298473783 | 5.38E-13    | 95.02493616 |
| PIH1D1                 | NM_017916    | 68.10039037 | 7.536769809 | 4.57E-05    | 9.035752995 |
| MBOAT2                 | NM_138799    | 48.57142857 | 0.124756946 | 2.30E-06    | 389.3284498 |
| RYK                    | NM_002958    | 46.77477667 | 0.524468425 | 1.93E-05    | 89.18511478 |
| NICN1                  | NM_032316    | 67.03989941 | 10.64681674 | 0.00054945  | 6.296708308 |
| RAB1B                  | NM_030981    | 55.61132799 | 5.971048147 | 0.00048885  | 9.313495154 |
| HARBI1                 | NM_173811    | 101.3256137 | 2.900398422 | 2.98E-10    | 34.93506717 |
| STAG3L5P-PVRIG2P-PILRB | NR_036569    | 203.1222656 | 8.415348618 | 2.32E-17    | 24.13711836 |
| DDX58                  | NM_014314    | 61.85585918 | 1.103293766 | 2.86E-07    | 56.06472284 |
| UBE2Z                  | NM_023079    | 200.7953682 | 10.21034558 | 1.47E-16    | 19.66587385 |
| PKN3                   | NM_013355    | 77.20206442 | 6.285250468 | 5.34E-06    | 12.28305297 |
| DDX5                   | NM_004396    | 178.4684708 | 12.26309898 | 6.20E-14    | 14.55329286 |
| BMS1                   | NM_014753    | 197.9382254 | 1.589465851 | 3.12E-22    | 124.5312853 |
| COQ6                   | NM_182476    | 152.7541851 | 4.232829879 | 2.48E-15    | 36.08795758 |
| STAG3L1                | NR_040583    | 315.8764507 | 14.42563981 | 8.10E-28    | 21.89687631 |
| ABHD17B                | NM_001025780 | 136.6718189 | 0.541899943 | 2.37E-17    | 252.208587  |
| RBM14-RBM4             | NM_001198846 | 187.3050222 | 8.556292589 | 5.97E-16    | 21.89090897 |
| ZNF500                 | NM_021646    | 98.2033481  | 3.126747241 | 1.31E-09    | 31.40751092 |
| PRPF31                 | NM_015629    | 75.34620525 | 3.049882409 | 6.57E-07    | 24.70462632 |
| HEATR5A                | NM_015473    | 191.9588169 | 0.219768645 | 1.37E-26    | 873.4586176 |
| HNRNPM                 | NM_005968    | 102.3861047 | 3.509819644 | 2.97E-09    | 29.17132932 |
| PIGW                   | NM_178517    | 132.2239396 | 8.066292811 | 4.86E-11    | 16.39215718 |
| LRRCC1                 | NM_033402    | 113.5495533 | 0.1192187   | 8.18E-19    | 952.4475059 |
| TBC1D32                | NR_104452    | 87.57014489 | 0.447314222 | 4.91E-10    | 195.7687474 |
| ERLIN1                 | NM_001100626 | 154.6100443 | 0.825658014 | 1.93E-19    | 187.2567598 |
| PROSER3                | NM_001039887 | 75.34620525 | 2.549351169 | 1.89E-07    | 29.55505157 |
| TAF13                  | NM_005645    | 124.1827566 | 2.658876261 | 9.10E-14    | 46.70497774 |
| ITGB1BP1               | NM_022334    | 123.1222656 | 5.089464999 | 4.72E-11    | 24.19159295 |
| CNTNAP3                | NM_033655    | 29.10167405 | 0.667309431 | 0.002554847 | 43.61046422 |
| ABHD5                  | NM_016006    | 189.3667968 | 0.9146125   | 1.63E-24    | 207.0459312 |
| FBXL12                 | NM_017703    | 203.9176338 | 0.750717349 | 9.52E-30    | 271.6303735 |
| TTC7A                  | NM_001288953 | 98.99871632 | 3.110715537 | 1.82E-09    | 31.82506248 |
| ARHGAP42               | NM_152432    | 55.34620525 | 0.715865429 | 5.01E-06    | 77.31370028 |
| TICAM1                 | NM_182919    | 91.22265597 | 4.309034411 | 1.25E-08    | 21.17009225 |
| CYR61                  | NM_001554    | 195.3462052 | 7.348673045 | 3.98E-18    | 26.58251416 |
| SUPV3L1                | NM_003171    | 66.50965393 | 1.485339963 | 7.03E-07    | 44.77739479 |
| PRPF40B                | NM_001031698 | 37.40797988 | 2.186455029 | 0.001495598 | 17.10896377 |
| MNX1-AS1               | NR_038835    | 141.5907364 | 10.41706455 | 4.00E-11    | 13.59219153 |
| POLR3A                 | NM_007055    | 58.73359358 | 2.390501258 | 1.02E-05    | 24.56957234 |
| BMS1P4                 | NR_026592    | 217.6731026 | 1.768682465 | 2.90E-26    | 123.0707642 |
| SAP18                  | NM_005870    | 122.6512274 | 5.837177596 | 4.02E-11    | 21.01207739 |
| ELK3                   | NM_005230    | 37.14285714 | 2.603554869 | 0.002358832 | 14.26620871 |
| TMEM80                 | NM_174940    | 75.08108251 | 10.62844628 | 0.000109907 | 7.064163524 |
| VTI1B                  | NM_006370    | 63.91763382 | 3.907378348 | 2.52E-05    | 16.35818908 |
| MRPL1                  | NM_020236    | 84.97812478 | 0.346758023 | 5.73E-11    | 245.0646249 |
| OVCA2                  | NM_080822    | 99.26383906 | 16.97272417 | 6.50E-05    | 5.848432938 |
| APOOL                  | NM_198450    | 31.42857143 | 0.489211264 | 0.000885111 | 64.24335197 |
| NFATC2IP               | NM_032815    | 92.75418513 | 4.068299043 | 1.06E-08    | 22.79925447 |
| ABHD17C                | NM_021214    | 106.2445312 | 1.654816207 | 6.92E-11    | 64.20322134 |
| CCDC92                 | NM_025140    | 37.40797988 | 1.785596067 | 0.001755036 | 20.94985566 |
| PAPOLG                 | NM_022894    | 109.3667968 | 0.471711135 | 6.73E-15    | 231.8512089 |
| TMEM5                  | NM_014254    | 172.2239396 | 1.463801275 | 1.03E-20    | 117.6552737 |
| STARD7                 | NM_020151    | 216.6718189 | 6.925215922 | 1.24E-20    | 31.28737377 |
| TTC3                   | NM_001001894 | 201.060491  | 1.276404796 | 6.02E-21    | 157.5209461 |
| LASP1                  | NR_073384    | 135.0810825 | 5.62047799  | 4.07E-12    | 24.0337357  |
| DUS1L                  | NM_022156    | 88.83655131 | 17.605084   | 7.65E-05    | 5.046073697 |

|              |              |             |             |             |             |
|--------------|--------------|-------------|-------------|-------------|-------------|
| KIAA0753     | NM_014804    | 35.34620525 | 0.939497152 | 0.000472894 | 37.62247194 |
| KHK          | NM_006488    | 91.95881691 | 3.308453701 | 4.94E-09    | 27.79510467 |
| TTC27        | NM_001193509 | 51.95881691 | 0.164357975 | 2.34E-06    | 316.1320096 |
| GNG7         | NM_052847    | 97.67310262 | 1.01277825  | 1.09E-10    | 96.4407585  |
| SDAD1        | NM_001288984 | 92.75418513 | 3.197143231 | 4.44E-09    | 29.01158267 |
| PIAS4        | NM_015897    | 51.69369417 | 1.96560957  | 4.84E-05    | 26.29906516 |
| SFT2D2       | NM_199344    | 117.9382254 | 5.77300407  | 2.44E-10    | 20.4292642  |
| C10orf25     | NM_001039380 | 54.55083703 | 2.458114908 | 2.37E-05    | 22.19214279 |
| ZNF267       | NM_001265588 | 112.7541851 | 0.052284957 | 1.08E-19    | 2156.532025 |
| NOL7         | NM_016167    | 156.1415735 | 4.323061125 | 1.86E-16    | 36.11828955 |
| HS3ST1       | NM_005114    | 141.060491  | 7.403269544 | 5.66E-12    | 19.05380996 |
| GNB1L        | NM_053004    | 170.162165  | 3.279323237 | 2.32E-17    | 51.8894152  |
| PDXK         | NM_003681    | 161.060491  | 3.430458886 | 1.76E-15    | 46.95013009 |
| NCLN         | NM_020170    | 87.03989941 | 3.245178248 | 7.08E-08    | 26.82130002 |
| FAM3C        | NM_001040020 | 121.060491  | 2.154649999 | 1.71E-12    | 56.18568725 |
| ZNF425       | NM_001001661 | 147.0398994 | 3.253780184 | 7.05E-15    | 45.1904834  |
| MTMR6        | NM_004685    | 98.73359358 | 0.207461236 | 2.95E-15    | 475.9134547 |
| MSX2         | NM_002449    | 158.9987163 | 5.071773277 | 5.03E-16    | 31.34972871 |
| MRFAP1L1     | NM_203462    | 55.87645073 | 10.34236384 | 0.002328911 | 5.402676948 |
| GRPEL1       | NM_025196    | 118.2033481 | 8.784369314 | 3.10E-09    | 13.45609957 |
| ANXA3        | NM_005139    | 97.93822536 | 3.186729292 | 1.68E-09    | 30.73314875 |
| P2RY2        | NM_176072    | 74.07979883 | 3.647234802 | 1.52E-06    | 20.31122284 |
| LANCL1       | NM_001136574 | 135.8764507 | 0.94411587  | 4.72E-16    | 143.9192529 |
| TBX18        | NM_001080508 | 24.18275656 | 0.389986875 | 0.004865016 | 62.00915488 |
| ARL3         | NM_004311    | 70.16216501 | 3.059311111 | 6.17E-07    | 22.93397515 |
| KATNBL1      | NM_024713    | 124.4478793 | 0.12597028  | 1.59E-19    | 987.9146016 |
| FOXD1        | NM_004472    | 60.53024548 | 6.441420062 | 0.000215071 | 9.397034334 |
| TIMM22       | NM_013337    | 129.6319195 | 5.730896956 | 3.76E-12    | 22.61983081 |
| ANTXR1       | NM_053034    | 69.36679679 | 0.174075025 | 9.70E-09    | 398.487933  |
| SCPEP1       | NM_021626    | 138.4684708 | 3.477783339 | 1.88E-13    | 39.8151516  |
| UQCRFS1      | NM_006003    | 59.26383906 | 3.833558107 | 3.96E-05    | 15.45922545 |
| AUNIP        | NM_001287490 | 135.3462052 | 2.608728995 | 1.06E-14    | 51.88204888 |
| YWHAH        | NM_003405    | 120.5302455 | 7.465503471 | 7.26E-10    | 16.14495874 |
| TLR5         | NM_003268    | 95.87645073 | 0.973751009 | 3.58E-11    | 98.46095131 |
| ATP6V0E2-AS1 | NR_027040    | 44.18275656 | 0.622097432 | 1.23E-05    | 71.02224549 |
| GTF2F2       | NM_004128    | 81.85585918 | 0.433593461 | 1.04E-09    | 188.7848102 |
| POP4         | NR_027368    | 52.22393965 | 1.123432174 | 4.97E-06    | 46.48606374 |
| UGCG         | NM_003358    | 131.6936942 | 2.656965878 | 6.47E-14    | 49.56544428 |
| TPMT         | NM_000367    | 79.79408454 | 0.816651994 | 2.11E-09    | 97.70879781 |
| RPL13AP5     | NR_026712    | 183.9176338 | 34.52873083 | 4.58E-09    | 5.326510108 |
| SHISA4       | NR_030775    | 121.060491  | 10.95623216 | 5.13E-09    | 11.04946383 |
| MIS18A       | NM_018944    | 69.36679679 | 1.640434141 | 4.08E-08    | 42.28563347 |
| MLLT4-AS1    | NR_027906    | 77.40797988 | 11.17967692 | 0.000113798 | 6.923990776 |
| CFAP20       | NM_013242    | 83.91763382 | 3.820765551 | 9.45E-08    | 21.96356534 |
| GPRC5A       | NM_003979    | 77.93822536 | 6.803771644 | 6.82E-06    | 11.45515009 |
| MGA          | NM_001164273 | 76.40669621 | 0.236239674 | 5.23E-10    | 323.4287242 |
| ERP29        | NM_006817    | 101.060491  | 11.11500328 | 4.83E-07    | 9.092259211 |
| FAM71E1      | NM_138411    | 154.3449216 | 1.639682507 | 5.82E-20    | 94.13098019 |
| C11orf58     | NM_014267    | 61.85585918 | 0.922761845 | 2.96E-07    | 67.0333949  |
| LINC00612    | NR_034140    | 153.8146761 | 2.753435998 | 1.24E-17    | 55.86281148 |
| CLCC1        | NM_001048210 | 155.0810825 | 0.803355072 | 1.20E-19    | 193.0417669 |
| CDR2L        | NM_014603    | 234.0797988 | 4.224883047 | 5.90E-25    | 55.40503635 |
| LRP4-AS1     | NR_038909    | 105.2432475 | 3.184615848 | 5.29E-10    | 33.04739175 |
| C19orf44     | NM_032207    | 35.08108251 | 3.753561703 | 0.003862317 | 9.346078546 |
| ERCC6-PGBD3  | NM_001277058 | 126.5096539 | 1.940862483 | 2.15E-14    | 65.1821832  |
| 2-Mar        | NM_017898    | 132.4890624 | 3.181153068 | 1.25E-12    | 41.64812556 |
| TMEM2        | NM_013390    | 180.5302455 | 1.532002525 | 4.34E-19    | 117.8393916 |
| IL15         | NM_172175    | 39.26383906 | 0.658193246 | 0.000108862 | 59.65396835 |
| FUT10        | NM_032664    | 147.0398994 | 0.838832236 | 3.76E-17    | 175.2911882 |
| MAGEA3       | NM_005362    | 45.71428571 | 1.639870555 | 4.36E-05    | 27.87676477 |
| RSPRY1       | NM_133368    | 118.4684708 | 2.103415947 | 4.37E-12    | 56.32194194 |
| POLE4        | NM_019896    | 120.2651227 | 2.042065984 | 5.02E-14    | 58.89384755 |
| LOC101927746 | NR_110115    | 175.3462052 | 11.40017371 | 1.16E-13    | 15.38101171 |
| SPR          | NM_003124    | 120.0592073 | 3.33677672  | 5.17E-13    | 35.98059366 |

|            |              |             |             |             |             |
|------------|--------------|-------------|-------------|-------------|-------------|
| SDHAF2     | NM_017841    | 129.8970423 | 2.786554231 | 1.12E-13    | 46.61565198 |
| MAOB       | NM_000898    | 68.57142857 | 0.458667943 | 3.50E-08    | 149.5012452 |
| CSRNP1     | NM_033027    | 101.8558592 | 5.743992224 | 4.02E-09    | 17.73259002 |
| ITFG1      | NM_030790    | 121.8558592 | 0.041864047 | 3.41E-18    | 2910.751996 |
| CDK2AP2    | NR_073484    | 110.162165  | 11.3647686  | 2.76E-07    | 9.693304715 |
| PPRC1      | NM_001288727 | 143.9176338 | 9.383140606 | 9.44E-12    | 15.3378959  |
| GPRIN1     | NM_052899    | 68.57142857 | 4.927662697 | 4.72E-06    | 13.91560924 |
| ZNF449     | NM_152695    | 49.10167405 | 0.202951594 | 1.09E-07    | 241.9378582 |
| TMEM97     | NM_014573    | 64.71300204 | 3.784271004 | 3.67E-06    | 17.10052001 |
| AAMP       | NM_001087    | 130.4272878 | 8.163504435 | 1.95E-11    | 15.97687473 |
| NOL11      | NM_015462    | 111.4877787 | 1.445965262 | 6.71E-13    | 77.10266743 |
| STK35      | NM_080836    | 127.3050222 | 4.16629476  | 8.36E-12    | 30.55593266 |
| WASH7P     | NR_024540    | 46.50965393 | 1.96896056  | 0.000109248 | 23.62142486 |
| SIK2       | NM_015191    | 66.24453119 | 1.238081882 | 2.46E-07    | 53.50577548 |
| TRMT6      | NM_001281467 | 106.5096539 | 2.282670913 | 1.46E-11    | 46.66010038 |
| PTPLB      | NM_198402    | 123.6525111 | 1.141007164 | 8.17E-13    | 108.3713713 |
| PHC3       | NM_024947    | 78.99871632 | 0.547131667 | 1.20E-09    | 144.3870298 |
| RPS6       | NM_001010    | 132.7541851 | 12.44912629 | 1.66E-09    | 10.66373511 |
| MPV17      | NM_002437    | 89.89704227 | 3.674884746 | 1.35E-08    | 24.4625474  |
| GCA        | NM_012198    | 81.85585918 | 1.554492823 | 1.76E-09    | 52.65759866 |
| PWP1       | NM_007062    | 82.12098192 | 2.336665403 | 1.24E-08    | 35.14451912 |
| TMEM192    | NM_001100389 | 122.3861047 | 2.251266281 | 4.19E-13    | 54.36322912 |
| C1orf145   | NR_073154    | 71.42857143 | 5.637803187 | 7.61E-06    | 12.6695752  |
| C9orf3     | NM_032823    | 118.4684708 | 0.550129418 | 7.31E-13    | 215.3465475 |
| VPS18      | NM_020857    | 58.46847084 | 2.965228118 | 2.53E-05    | 19.71803467 |
| PFN2       | NM_002628    | 72.22393965 | 7.827968658 | 2.72E-05    | 9.226396119 |
| B2M        | NM_004048    | 161.8558592 | 1.697321265 | 2.58E-20    | 95.35958954 |
| ANKRD13D   | NR_030767    | 51.95881691 | 2.23074733  | 2.22E-05    | 23.29211211 |
| POLR2C     | NM_032940    | 89.89704227 | 7.360968384 | 8.03E-07    | 12.21266518 |
| SUGP1      | NM_172231    | 109.3667968 | 1.794258433 | 1.83E-11    | 60.95375938 |
| CDC123     | NM_006023    | 103.9176338 | 2.987494543 | 3.43E-10    | 34.78420874 |
| STRIP2     | NM_020704    | 146.5096539 | 1.047273042 | 1.30E-16    | 139.8963288 |
| ZNF554     | NM_001102651 | 123.3873883 | 4.170877631 | 2.75E-12    | 29.58307561 |
| KCTD21-AS1 | NR_102281    | 52.75418513 | 1.097253903 | 3.02E-05    | 48.07837548 |
| GJB2       | NM_004004    | 108.8365513 | 14.20950909 | 4.82E-07    | 7.659416709 |
| DDX18      | NM_006773    | 44.18275656 | 0.974847048 | 0.000128496 | 45.3227577  |
| CEP85L     | NM_206921    | 86.77477667 | 0.735074686 | 1.09E-09    | 118.0489253 |
| EME2       | NM_001257370 | 118.4684708 | 13.14351491 | 9.97E-08    | 9.013454291 |
| ELAC1      | NM_018696    | 138.7335936 | 1.728468669 | 5.46E-17    | 80.26387522 |
| SGTA       | NM_003021    | 110.4272878 | 1.967254058 | 3.09E-12    | 56.13270299 |
| LIN9       | NM_001270409 | 61.3256137  | 0.781996585 | 4.71E-07    | 78.42184333 |
| DDIAS      | NM_145018    | 67.30502215 | 1.056523206 | 2.23E-07    | 63.70425351 |
| PCSK4      | NM_017573    | 47.57014489 | 1.749435147 | 1.87E-05    | 27.1917167  |
| VSNL1      | NM_003385    | 51.95881691 | 1.035945509 | 7.91E-06    | 50.15593623 |
| GOLGA3     | NM_001172557 | 69.89704227 | 1.397454889 | 5.86E-07    | 50.0173872  |
| ZNFX1      | NM_021035    | 107.0398994 | 3.672459893 | 9.51E-10    | 29.14664899 |
| PPAPDC2    | NM_203453    | 138.2033481 | 11.56436695 | 2.68E-10    | 11.95079235 |
| ARIH1      | NM_005744    | 152.4890624 | 1.271423748 | 1.12E-15    | 119.9356726 |
| GDE1       | NM_016641    | 141.8558592 | 2.567312136 | 2.88E-15    | 55.25462105 |
| FOSL2      | NM_005253    | 118.2033481 | 1.150955093 | 1.91E-14    | 102.700226  |
| MAP4K5     | NM_006575    | 84.71300204 | 0.64100863  | 4.97E-10    | 132.1557902 |
| GINS3      | NM_001126130 | 64.4478793  | 1.14062926  | 7.49E-08    | 56.50203933 |
| RRAGD      | NM_021244    | 52.48906239 | 0.544955583 | 1.72E-06    | 96.31805602 |
| FUCA1      | NM_000147    | 90.42728775 | 2.165385655 | 6.89E-10    | 41.76036151 |
| TRUB1      | NM_139169    | 99.79408454 | 0.545228116 | 1.26E-13    | 183.031802  |
| MFN1       | NM_033540    | 77.67310262 | 1.07140997  | 3.64E-08    | 72.49615443 |
| TOR1A      | NM_000113    | 129.3667968 | 6.134708265 | 4.28E-12    | 21.08768522 |
| KITLG      | NM_003994    | 124.1827566 | 9.356307978 | 8.81E-10    | 13.27262386 |
| GANC       | NM_198141    | 40.79536822 | 0.521434062 | 8.10E-05    | 78.23686869 |
| ITGA5      | NM_002205    | 153.0193079 | 3.222722862 | 6.36E-16    | 47.48137349 |
| NANP       | NM_152667    | 149.1016741 | 3.381369513 | 7.25E-16    | 44.09505482 |
| TRA2B      | NM_004593    | 154.550837  | 7.512065677 | 1.10E-13    | 20.57368022 |
| ABCB6      | NM_005689    | 137.6731026 | 7.483718712 | 2.86E-12    | 18.39634918 |
| TAF9       | NM_003187    | 141.060491  | 3.784023607 | 8.61E-15    | 37.27790986 |

|              |              |             |             |             |             |
|--------------|--------------|-------------|-------------|-------------|-------------|
| ABCE1        | NM_002940    | 67.57014489 | 3.002696275 | 9.67E-07    | 22.50315673 |
| KCNMB4       | NM_014505    | 31.95881691 | 0.126774471 | 0.000238767 | 252.0918968 |
| MZT2A        | NM_001085365 | 83.1222656  | 10.18540319 | 1.64E-05    | 8.160920491 |
| GPR180       | NM_180989    | 187.3050222 | 0.539737999 | 2.94E-26    | 347.0295266 |
| TP53INP1     | NM_001135733 | 66.50965393 | 0.573710768 | 5.11E-08    | 115.9288924 |
| SNAP29       | NM_004782    | 129.6319195 | 0.663742243 | 1.62E-16    | 195.3046094 |
| METTL8       | NM_024770    | 152.2239396 | 0.907865188 | 1.73E-17    | 167.6724051 |
| FER          | NM_005246    | 43.1222656  | 0.264823723 | 6.86E-05    | 162.8338469 |
| HPS3         | NM_032383    | 144.713002  | 1.960639022 | 8.95E-16    | 73.80910022 |
| CDK11A       | NM_024011    | 78.2033481  | 0.546517601 | 7.75E-10    | 143.093924  |
| RAD23A       | NR_072976    | 46.24453119 | 6.346753326 | 0.003212944 | 7.286328745 |
| RAB11B-AS1   | NR_038237    | 77.93822536 | 4.353634415 | 5.56E-07    | 17.90187644 |
| MTAP         | NM_002451    | 175.3462052 | 9.632283843 | 7.19E-14    | 18.20401144 |
| GGA2         | NM_015044    | 121.3256137 | 2.681732784 | 2.80E-12    | 45.24149998 |
| SIRT4        | NM_012240    | 58.99871632 | 3.121728427 | 1.58E-05    | 18.89937504 |
| 1-Mar        | NM_022746    | 44.18275656 | 3.369191119 | 0.000523591 | 13.11375787 |
| C12orf75     | NM_001145199 | 88.83655131 | 1.414821473 | 2.14E-09    | 62.78993711 |
| PARGP1       | NR_029388    | 78.2033481  | 0.230094251 | 5.82E-10    | 339.8752801 |
| LOC100506083 | NR_039997    | 58.46847084 | 3.475695085 | 1.82E-05    | 16.8220944  |
| MTERF3       | NM_001286643 | 246.5096539 | 3.161356602 | 5.96E-28    | 77.97590875 |
| TBK1         | NM_013254    | 127.3050222 | 0.681719788 | 2.14E-15    | 186.7409814 |
| NUDT6        | NM_007083    | 69.36679679 | 1.098716679 | 1.98E-07    | 63.13438043 |
| PLOD1        | NM_000302    | 130.162165  | 3.874575319 | 2.79E-12    | 33.59391786 |
| ZNF282       | NM_003575    | 158.2033481 | 0.261737337 | 1.23E-23    | 604.4355374 |
| RITA1        | NM_032848    | 137.6731026 | 4.568541962 | 7.28E-14    | 30.13501983 |
| AIFM2        | NM_001198696 | 115.611328  | 4.079910837 | 4.80E-11    | 28.33672906 |
| ZNF365       | NM_199451    | 60.53024548 | 0.403833462 | 8.90E-07    | 149.8891281 |
| ASCC3        | NM_022091    | 130.6924105 | 2.667604847 | 2.15E-13    | 48.99241754 |
| MFSD9        | NM_032718    | 177.9382254 | 0.664829682 | 1.56E-25    | 267.6448272 |
| TADA1        | NM_053053    | 35.61132799 | 3.551678766 | 0.003555657 | 10.02661849 |
| FA2H         | NM_024306    | 50.16216501 | 1.12107675  | 5.47E-06    | 44.74463057 |
| INTS3        | NM_023015    | 103.1222656 | 0.809290772 | 9.30E-12    | 127.4230093 |
| STAG3L3      | NR_040582    | 131.9588169 | 3.511011166 | 4.77E-14    | 37.5842772  |
| COG1         | NM_018714    | 176.1415735 | 9.049687087 | 1.33E-15    | 19.46383027 |
| CCDC176      | NM_025057    | 58.2033481  | 1.464002036 | 1.27E-05    | 39.75633002 |
| LINC00893    | NR_027455    | 28.83655131 | 0.210893089 | 0.000178833 | 136.7354023 |
| LOC389641    | NR_033928    | 151.4877787 | 5.449410181 | 4.88E-15    | 27.7989312  |
| BLM          | NM_001287246 | 95.34620525 | 0.079452475 | 1.59E-14    | 1200.040719 |
| GAS6-AS2     | NR_044993    | 47.03989941 | 3.265815631 | 0.000443059 | 14.40372168 |
| MEIG1        | NM_001080836 | 183.1222656 | 6.882906542 | 4.48E-17    | 26.6053686  |
| PIGH         | NM_004569    | 149.8970423 | 2.59428284  | 1.63E-16    | 57.77976092 |
| SUGP2        | NM_014884    | 118.2033481 | 3.945979187 | 1.04E-10    | 29.95539066 |
| VPRBP        | NM_001171904 | 55.08108251 | 0.985143538 | 3.39E-06    | 55.91173306 |
| ALG14        | NM_144988    | 37.93822536 | 0.222622431 | 9.53E-05    | 170.4151067 |
| KIAA2018     | NM_001009899 | 60.26512274 | 2.05657659  | 8.55E-06    | 29.30361214 |
| ABCA11P      | NR_002451    | 146.7747767 | 1.325909646 | 2.47E-16    | 110.6974198 |
| AK7          | NM_152327    | 63.38738834 | 1.164433105 | 4.06E-07    | 54.43626436 |
| PMM1         | NM_002676    | 103.9176338 | 1.790295136 | 1.64E-11    | 58.04497356 |
| PKN2-AS1     | NR_110682    | 35.61132799 | 0.315965785 | 0.000423115 | 112.7062791 |
| RND3         | NM_001254738 | 101.3256137 | 6.672495173 | 2.94E-08    | 15.18556568 |
| COX6B1       | NM_001863    | 63.91763382 | 5.579248668 | 7.31E-05    | 11.45631565 |
| EEPDI        | NM_030636    | 125.9794085 | 0.795021888 | 2.73E-14    | 158.4603019 |
| MND1         | NM_032117    | 93.01930787 | 0.741402491 | 1.94E-11    | 125.4639807 |
| ENDOG        | NM_004435    | 120.7953682 | 15.78319999 | 2.36E-07    | 7.653414283 |
| EEF2K        | NM_013302    | 118.2033481 | 1.13638449  | 2.87E-12    | 104.0170375 |
| LSM11        | NM_173491    | 50.16216501 | 2.249450162 | 2.22E-05    | 22.299745   |
| PTPN21       | NM_007039    | 34.55083703 | 0.925359619 | 0.000537701 | 37.33774017 |
| PDLIM1       | NM_020992    | 61.3256137  | 1.110572119 | 5.26E-06    | 55.21983907 |
| C12orf73     | NM_001135570 | 107.3050222 | 5.283802416 | 7.22E-10    | 20.30829575 |
| NUFIP1       | NM_012345    | 60.79536822 | 1.91971849  | 8.34E-06    | 31.66889757 |
| TMEM203      | NM_053045    | 56.93694168 | 1.478772255 | 1.62E-05    | 38.50284688 |
| KCNK5        | NM_003740    | 141.8558592 | 2.707186393 | 4.65E-15    | 52.39973855 |
| WEE2-AS1     | NR_015392    | 35.34620525 | 1.491615974 | 0.003131679 | 23.69658535 |
| NEK8         | NM_178170    | 47.03989941 | 2.789613772 | 0.000144022 | 16.86251333 |

|              |              |             |             |             |             |
|--------------|--------------|-------------|-------------|-------------|-------------|
| LOC100132057 | NR_111930    | 164.713002  | 5.160035912 | 4.64E-16    | 31.92090227 |
| POLQ         | NM_199420    | 90.16216501 | 1.097495512 | 2.66E-10    | 82.15265029 |
| C12orf29     | NM_001009894 | 158.9987163 | 5.327975139 | 1.35E-15    | 29.84224066 |
| NPAT         | NM_002519    | 84.97812478 | 1.145222046 | 8.00E-09    | 74.20231308 |
| YBEY         | NM_001006114 | 120.7953682 | 4.40164397  | 4.98E-12    | 27.44323917 |
| PRPF4        | NM_004697    | 169.6319195 | 3.612099197 | 3.33E-18    | 46.96214315 |
| ZNF574       | NM_022752    | 101.060491  | 4.897531246 | 2.70E-09    | 20.63498646 |
| DPY19L2P3    | NR_036482    | 111.9588169 | 9.470282156 | 1.12E-08    | 11.82212051 |
| UACA         | NM_018003    | 127.8352676 | 0.167351725 | 2.68E-18    | 763.8718272 |
| LMO4         | NM_006769    | 49.10167405 | 8.167824082 | 0.002973092 | 6.011597894 |
| ZNF658       | NM_033160    | 104.713002  | 0.629440149 | 4.28E-14    | 166.3589497 |
| MAN2B2       | NM_015274    | 118.4684708 | 1.476323908 | 1.20E-12    | 80.24558175 |
| MIR31HG      | NR_027054    | 135.0810825 | 7.015751241 | 7.20E-11    | 19.25397265 |
| NUP155       | NM_001278312 | 49.63191953 | 1.769359055 | 0.000160826 | 28.05079013 |
| RBX1         | NM_014248    | 112.2239396 | 4.927509954 | 1.78E-10    | 22.7749798  |
| RHEB         | NM_005614    | 68.10039037 | 2.359749907 | 1.27E-06    | 28.85915587 |
| PLIN2        | NM_001122    | 35.61132799 | 2.934387072 | 0.002576274 | 12.13586589 |
| GALNT6       | NM_007210    | 73.28443061 | 1.948929356 | 1.72E-07    | 37.60240482 |
| RAB4A        | NM_001271998 | 98.46847084 | 2.649742498 | 5.62E-10    | 37.16152454 |
| METTL10      | NM_212554    | 204.1827566 | 1.183726783 | 1.56E-25    | 172.4914563 |
| ACTL6A       | NM_178042    | 129.1016741 | 3.33664389  | 1.10E-12    | 38.69207452 |
| METTL16      | NM_024086    | 78.2033481  | 1.333429801 | 1.53E-07    | 58.64826782 |
| BCR          | NM_021574    | 61.3256137  | 2.481001228 | 1.53E-05    | 24.71809083 |
| LOC283335    | NR_033854    | 183.3873883 | 26.10712151 | 1.18E-10    | 7.024420071 |
| SCLY         | NM_016510    | 58.46847084 | 2.697491106 | 1.78E-05    | 21.67513016 |
| EIF2B5       | NM_003907    | 115.3462052 | 5.761114427 | 1.30E-10    | 20.02150916 |
| LINC00263    | NR_026762    | 141.3256137 | 5.741550582 | 4.17E-13    | 24.61453778 |
| LOC100507373 | NR_045214    | 110.4272878 | 6.176652708 | 3.92E-09    | 17.87817657 |
| CDH15        | NM_004933    | 57.67310262 | 4.466183443 | 0.000104208 | 12.91328566 |
| NSMCE1       | NM_145080    | 75.61132799 | 1.285636395 | 1.07E-07    | 58.81237359 |
| C21orf59     | NM_021254    | 184.9781248 | 4.793143851 | 6.64E-19    | 38.5922331  |
| SYNJ2        | NM_003898    | 120.7953682 | 1.814353    | 7.41E-12    | 66.57765506 |
| CLDN3        | NM_001306    | 60.79536822 | 1.98142815  | 2.28E-05    | 30.68260044 |
| PRH1         | NM_001291315 | 135.0810825 | 0.428407231 | 3.13E-15    | 315.3099967 |
| FEM1C        | NM_020177    | 75.08108251 | 1.901924551 | 7.17E-08    | 39.47637275 |
| PXMP2        | NM_018663    | 60.53024548 | 2.912149867 | 4.32E-06    | 20.78541567 |
| NBEAL2       | NM_015175    | 55.34620525 | 5.3030441   | 0.000240621 | 10.43668584 |
| CXCL16       | NM_001100812 | 108.8365513 | 11.72720108 | 8.14E-08    | 9.280692858 |
| SNX30        | NM_001012994 | 46.77477667 | 0.482386572 | 2.28E-05    | 96.96533723 |
| ATP5G1       | NM_001002027 | 128.3655131 | 17.27115309 | 4.86E-08    | 7.432364965 |
| ARHGAP31-AS1 | NR_046748    | 41.59073644 | 0.64388066  | 1.82E-05    | 64.59385883 |
| SLC39A13     | NM_152264    | 72.22393965 | 11.78923474 | 0.000206007 | 6.126261904 |
| C8orf44      | NM_019607    | 67.57014489 | 3.296933644 | 2.51E-06    | 20.49484527 |
| HEXA-AS1     | NR_027262    | 86.77477667 | 6.372310761 | 7.36E-07    | 13.61747409 |
| LRRC8C       | NM_032270    | 109.1016741 | 0.547443956 | 1.97E-13    | 199.2928645 |
| FIG4         | NM_014845    | 118.2033481 | 0.606816203 | 9.91E-14    | 194.7926694 |
| MYEOV2       | NM_138336    | 92.48906239 | 0.124061596 | 2.66E-15    | 745.5092113 |
| ARRB1        | NM_020251    | 73.01930787 | 3.140870124 | 5.38E-07    | 23.24811437 |
| WDR43        | NM_015131    | 98.46847084 | 1.675044379 | 5.38E-10    | 58.78558926 |
| SPTSSA       | NM_138288    | 112.2239396 | 3.238079814 | 1.38E-10    | 34.65755822 |
| CNIH1        | NM_005776    | 70.42728775 | 2.328222285 | 8.57E-08    | 30.24938306 |
| PPM1D        | NM_003620    | 137.4671872 | 1.556656744 | 1.74E-14    | 88.30924845 |
| TALDO1       | NM_006755    | 87.03989941 | 8.371784655 | 9.55E-07    | 10.39681537 |
| COMMD7       | NM_053041    | 35.34620525 | 1.227784236 | 0.003131679 | 28.78861302 |
| EXOSC9       | NM_001034194 | 53.81467609 | 2.614216641 | 1.53E-05    | 20.58539268 |
| JAGN1        | NM_032492    | 157.4079799 | 7.014010437 | 9.15E-15    | 22.44193693 |
| UTP6         | NM_018428    | 129.6319195 | 0.377287711 | 1.65E-17    | 343.5890319 |
| RAB21        | NM_014999    | 80.26512274 | 1.25575518  | 1.08E-08    | 63.91781138 |
| DNAJA2       | NM_005880    | 109.6319195 | 2.888265032 | 5.84E-11    | 37.95770759 |
| SF3B2        | NM_006842    | 90.16216501 | 4.1419529   | 1.25E-08    | 21.76803242 |
| RCN1         | NM_002901    | 92.75418513 | 6.934608258 | 1.61E-07    | 13.37554793 |
| RTKN2        | NM_145307    | 95.87645073 | 0.167798874 | 4.31E-14    | 571.3772003 |
| CISD2        | NM_001008388 | 209.6319195 | 4.234557217 | 8.10E-21    | 49.50503885 |
| TDRD3        | NM_001146071 | 148.8365513 | 0.101290454 | 2.12E-21    | 1469.40353  |



|              |              |             |             |             |             |
|--------------|--------------|-------------|-------------|-------------|-------------|
| MCOLN1       | NM_020533    | 98.2033481  | 6.189018185 | 1.96E-08    | 15.86735491 |
| AKR7A2       | NM_003689    | 206.5096539 | 6.501809362 | 3.96E-20    | 31.76187465 |
| PNKP         | NM_007254    | 115.611328  | 14.53717177 | 1.87E-07    | 7.95280745  |
| ANKRD36      | NM_001164315 | 113.8146761 | 0.217737498 | 8.05E-15    | 522.7150915 |
| HSF1         | NM_005526    | 169.8970423 | 5.668353805 | 1.19E-15    | 29.97290715 |
| ACAT1        | NM_000019    | 120.7953682 | 5.805206889 | 3.28E-10    | 20.80810737 |
| SVIP         | NM_148893    | 157.6731026 | 0.439497416 | 2.08E-23    | 358.7577466 |
| LRP10        | NM_014045    | 135.3462052 | 7.805171187 | 8.82E-12    | 17.34058126 |
| DICER1-AS1   | NR_015415    | 95.34620525 | 0.79026569  | 7.41E-12    | 120.6508222 |
| DEAF1        | NM_021008    | 35.08108251 | 3.232494198 | 0.004334065 | 10.85263588 |
| DNAJC25      | NR_037148    | 241.3256137 | 0.880740617 | 1.13E-32    | 274.003048  |
| ERV3-1       | NM_001007253 | 157.6731026 | 2.838363514 | 2.01E-17    | 55.55070795 |
| POLR1D       | NM_152705    | 134.8159598 | 1.655749631 | 1.30E-14    | 81.42291398 |
| ZNF664       | NM_001204298 | 60.53024548 | 3.512599977 | 1.10E-05    | 17.23231961 |
| PGLS         | NM_012088    | 112.7541851 | 5.576929849 | 2.01E-10    | 20.21796727 |
| HP1BP3       | NM_016287    | 124.1827566 | 1.760066682 | 3.44E-13    | 70.55571121 |
| PIGX         | NM_017861    | 143.1222656 | 2.294285135 | 3.44E-15    | 62.38207423 |
| SNX18        | NM_001145427 | 121.8558592 | 0.631804032 | 5.09E-16    | 192.8697081 |
| RPF1         | NM_025065    | 47.30502215 | 4.811414803 | 0.000675875 | 9.831832026 |
| INSIG2       | NM_016133    | 74.55083703 | 0.659002873 | 3.45E-09    | 113.1267254 |
| GDAP1        | NM_018972    | 168.3655131 | 0.503765009 | 1.39E-25    | 334.2143859 |
| LOC100130950 | NR_034082    | 32.48906239 | 0.938749375 | 0.000855517 | 34.6088778  |
| EREG         | NM_001432    | 167.0398994 | 13.16114491 | 1.06E-12    | 12.69189729 |
| SLX4         | NM_032444    | 127.5701449 | 0.552227284 | 4.97E-17    | 231.0102173 |
| TMEM181      | NM_020823    | 38.2033481  | 2.377756558 | 0.002429763 | 16.06697203 |
| TRIM56       | NM_030961    | 66.77477667 | 8.141497552 | 8.83E-05    | 8.201780599 |
| PLEKHM1P     | NR_024386    | 175.8764507 | 3.387914943 | 4.02E-17    | 51.91288851 |
| NGDN         | NM_015514    | 35.87645073 | 0.31175948  | 6.63E-05    | 115.0773369 |
| C12orf5      | NM_020375    | 127.0398994 | 0.577213201 | 5.60E-16    | 220.091812  |
| TIA1         | NM_022037    | 115.0810825 | 2.462467152 | 6.67E-12    | 46.73405792 |
| DRG1         | NM_004147    | 127.0398994 | 2.694753757 | 2.83E-13    | 47.14341675 |
| CDR2         | NM_001802    | 132.2239396 | 1.148689402 | 7.36E-16    | 115.1085223 |
| LOC645513    | NR_037630    | 42.12098192 | 1.480378184 | 0.000446323 | 28.45285238 |
| NAGPA        | NM_016256    | 52.75418513 | 0.512257237 | 7.90E-07    | 102.9837772 |
| NANS         | NM_018946    | 165.9794085 | 2.28738487  | 7.03E-18    | 72.56295634 |
| ZNF391       | NM_001076781 | 50.42728775 | 2.167015944 | 2.00E-05    | 23.27038151 |
| ZNF624       | NM_020787    | 93.01930787 | 0.549809444 | 9.31E-12    | 169.1846308 |
| TTC21A       | NM_001105513 | 69.36679679 | 0.855744705 | 1.18E-07    | 81.06015309 |
| UBE2S        | NM_014501    | 181.3256137 | 20.85963835 | 8.53E-12    | 8.692653759 |
| AMDHD1       | NM_152435    | 86.77477667 | 1.802632173 | 2.75E-09    | 48.13781646 |
| ANKIB1       | NM_019004    | 46.50965393 | 0.468976067 | 2.61E-05    | 99.17276649 |
| LAPTM4B      | NM_018407    | 213.2844306 | 1.547883656 | 2.19E-23    | 137.790996  |
| IL10RB       | NM_000628    | 101.060491  | 2.580301975 | 1.94E-10    | 39.16614875 |
| BNIP2        | NM_004330    | 60.79536822 | 2.243957714 | 5.26E-06    | 27.09292062 |
| DHX30        | NM_138615    | 133.0193079 | 5.991461783 | 3.90E-12    | 22.20147815 |
| ATP6V1C1     | NM_001695    | 115.611328  | 2.343264011 | 1.14E-11    | 49.33773037 |
| C11orf91     | NM_001166692 | 46.50965393 | 3.956702837 | 0.000530464 | 11.75464923 |
| C2orf47      | NM_024520    | 175.3462052 | 10.19425628 | 1.59E-14    | 17.20049021 |
| EFNA1        | NM_182685    | 132.4890624 | 10.6843097  | 4.55E-10    | 12.40033901 |
| AP1M2        | NM_005498    | 34.87516705 | 2.667281816 | 0.002741311 | 13.07517145 |
| ZSCAN25      | NM_145115    | 118.4684708 | 2.440915235 | 1.36E-12    | 48.5344469  |
| TIMM44       | NM_006351    | 60.79536822 | 4.627485883 | 4.32E-05    | 13.13788302 |
| FAM199X      | NM_207318    | 114.550837  | 0.44779105  | 1.96E-15    | 255.8131456 |
| DEPDC4       | NM_152317    | 103.6525111 | 2.577577262 | 9.89E-11    | 40.21315389 |
| GEMIN4       | NM_015721    | 146.5096539 | 9.694125992 | 1.25E-11    | 15.11324013 |
| STX16-NPEPL1 | NR_037945    | 138.7335936 | 2.140340359 | 2.01E-14    | 64.81847293 |
| SKIV2L2      | NM_015360    | 64.4478793  | 0.655926229 | 1.31E-07    | 98.25476783 |
| GFM1         | NM_024996    | 84.71300204 | 0.355508509 | 7.35E-12    | 238.2868477 |
| SLC30A3      | NM_003459    | 181.8558592 | 5.443219062 | 6.67E-19    | 33.40961609 |
| C22orf23     | NM_032561    | 50.16216501 | 6.063344324 | 0.001081834 | 8.273019366 |
| INO80B-WBP1  | NR_037849    | 132.2239396 | 28.00074067 | 3.10E-06    | 4.722158646 |
| LRRC29       | NM_001004055 | 30.42728775 | 1.46173803  | 0.004835826 | 20.81582823 |
| EIF2D        | NM_006893    | 121.3256137 | 1.576251271 | 2.82E-14    | 76.97098549 |
| PCNP         | NM_020357    | 101.3256137 | 2.170631071 | 3.65E-11    | 46.68025583 |

|              |              |             |             |             |             |
|--------------|--------------|-------------|-------------|-------------|-------------|
| ACO2         | NM_001098    | 72.75418513 | 5.351033465 | 7.24E-06    | 13.5962867  |
| PGBD2        | NM_170725    | 154.8159598 | 3.922419781 | 7.11E-16    | 39.46950311 |
| RIC8B        | NM_018157    | 161.060491  | 1.060984801 | 6.68E-17    | 151.8028259 |
| ORAI1        | NM_032790    | 113.0193079 | 5.2969389   | 3.29E-10    | 21.33672107 |
| FNDC3A       | NR_103528    | 97.67310262 | 0.123946321 | 1.19E-12    | 788.027444  |
| TMEM50A      | NM_014313    | 141.5907364 | 1.015282975 | 2.69E-18    | 139.4593822 |
| HAUS3        | NM_024511    | 126.2445312 | 1.027633218 | 4.63E-17    | 122.849796  |
| PPIH         | NM_006347    | 87.03989941 | 3.325926226 | 4.57E-08    | 26.1701233  |
| BMPR1A       | NM_004329    | 88.57142857 | 0.758797818 | 5.79E-10    | 116.7259927 |
| GPATCH1      | NM_018025    | 58.46847084 | 2.239243498 | 1.85E-05    | 26.11081416 |
| PANK4        | NM_018216    | 43.1222656  | 0.827298978 | 0.000108466 | 52.12416157 |
| RSF1         | NM_016578    | 76.14157347 | 0.662059351 | 8.70E-09    | 115.0071718 |
| C1orf106     | NM_018265    | 46.77477667 | 2.215991818 | 0.000190276 | 21.10782914 |
| CCDC24       | NM_152499    | 75.61132799 | 12.70703617 | 0.000216234 | 5.950351204 |
| PINX1        | NM_017884    | 98.99871632 | 0.388930246 | 4.67E-13    | 254.5410578 |
| WDFY2        | NM_052950    | 89.89704227 | 0.352694173 | 1.63E-10    | 254.8866668 |
| DNAJC13      | NM_015268    | 87.30502215 | 0.23058819  | 1.66E-11    | 378.6187934 |
| LINC01144    | NR_024270    | 157.4079799 | 8.033941784 | 6.85E-13    | 19.59287036 |
| IPO5P1       | NR_103742    | 41.06049096 | 2.102055254 | 0.00066831  | 19.53349745 |
| CIB1         | NM_001277764 | 91.95881691 | 14.9518187  | 3.56E-05    | 6.150343231 |
| EMC7         | NM_020154    | 101.060491  | 0.795234548 | 4.50E-13    | 127.0826213 |
| MAK          | NM_001242957 | 38.73359358 | 1.05693706  | 0.000121724 | 36.64702    |
| LOC100130238 | NR_024563    | 41.3256137  | 1.890181688 | 0.000805004 | 21.86330232 |
| ZNF598       | NM_178167    | 54.28571429 | 3.13922743  | 8.35E-05    | 17.29269876 |
| DGAT1        | NM_012079    | 149.6319195 | 20.00717392 | 2.45E-09    | 7.478913318 |
| RRP1B        | NM_015056    | 146.5096539 | 2.594232708 | 1.27E-15    | 56.47513944 |
| XPO5         | NM_020750    | 160.7953682 | 3.102314772 | 1.92E-16    | 51.83077155 |
| RAB11FIP5    | NM_015470    | 77.67310262 | 0.421572667 | 1.41E-10    | 184.2460594 |
| LINC01504    | NR_110952    | 40.79536822 | 0.336283048 | 2.23E-05    | 121.3125921 |
| PM20D2       | NM_001010853 | 177.9382254 | 1.077201343 | 6.58E-24    | 165.1856698 |
| SHQ1         | NM_018130    | 128.8365513 | 0.621657047 | 1.36E-15    | 207.2469892 |
| ARID3B       | NM_006465    | 135.0810825 | 1.211407164 | 9.46E-15    | 111.5075811 |
| LOC643339    | NR_040096    | 86.50965393 | 0.404661984 | 1.49E-09    | 213.7825081 |
| KARS         | NM_001130089 | 104.1827566 | 1.753375305 | 6.82E-12    | 59.41840077 |
| CFL1         | NM_005507    | 127.3050222 | 24.4874911  | 1.60E-06    | 5.198777678 |
| ADD3-AS1     | NR_038943    | 167.3050222 | 0.909203542 | 1.49E-19    | 184.0127259 |
| ABHD14A-ACY1 | NR_037192    | 160.7953682 | 16.40463118 | 4.88E-11    | 9.801827697 |
| SMARCC1      | NM_003074    | 142.1209819 | 1.884433872 | 6.74E-14    | 75.41839701 |
| AP1AR        | NM_018569    | 157.6731026 | 1.282510378 | 2.00E-18    | 122.9409955 |
| MSN          | NM_002444    | 66.24453119 | 0.977448424 | 1.21E-07    | 67.7729173  |
| EMP3         | NM_001425    | 81.06049096 | 7.749484505 | 2.34E-06    | 10.46011395 |
| LY6E         | NM_002346    | 120.5302455 | 16.1936043  | 2.16E-07    | 7.443077108 |
| DSC2         | NM_004949    | 83.91763382 | 1.253301956 | 6.25E-09    | 66.9572352  |
| PLA2G15      | NM_012320    | 81.06049096 | 1.62336555  | 3.10E-09    | 49.93360304 |
| SBDS         | NM_016038    | 144.713002  | 0.679886864 | 1.51E-21    | 212.8486514 |
| CPEB4        | NM_030627    | 74.07979883 | 0.866453431 | 9.05E-09    | 85.49772688 |
| NAGK         | NM_017567    | 213.2844306 | 7.170525344 | 1.72E-20    | 29.74460313 |
| STK38L       | NM_015000    | 146.7747767 | 0.843684395 | 3.48E-16    | 173.9688177 |
| PTPRE        | NM_130435    | 101.5907364 | 1.119671546 | 1.57E-11    | 90.73262316 |
| MRPS5        | NM_031902    | 168.8365513 | 1.101178143 | 1.11E-20    | 153.3235584 |
| NUP160       | NM_015231    | 117.9382254 | 0.655403509 | 1.35E-14    | 179.9475036 |
| ZFR          | NM_016107    | 114.550837  | 1.431794808 | 1.30E-11    | 80.00506526 |
| C9orf78      | NM_016520    | 161.5907364 | 0.826685114 | 6.08E-23    | 195.4683032 |
| RTTN         | NM_173630    | 115.3462052 | 0.36992587  | 1.74E-13    | 311.8089724 |
| ANO9         | NM_001012302 | 45.71428571 | 0.682884859 | 4.73E-06    | 66.94288955 |
| CPSF1        | NM_013291    | 225.5083703 | 6.611850231 | 1.02E-21    | 34.10669667 |
| LUZP1        | NM_033631    | 160.7953682 | 1.378299877 | 5.92E-17    | 116.6621074 |
| RELT         | NM_152222    | 204.4478793 | 3.407835142 | 1.45E-22    | 59.99347702 |
| MCM5         | NM_006739    | 35.87645073 | 2.599815354 | 0.001743834 | 13.79961491 |
| C15orf52     | NM_207380    | 95.61132799 | 12.4540405  | 1.95E-06    | 7.677133213 |
| GRAMD1C      | NM_017577    | 109.6319195 | 0.197609374 | 6.73E-15    | 554.7910887 |
| MSRB2        | NM_012228    | 118.2033481 | 1.921568678 | 3.87E-13    | 61.51398566 |
| CEP72        | NM_018140    | 37.14285714 | 0.12068393  | 1.36E-05    | 307.7697006 |
| CERS2        | NM_181746    | 57.40797988 | 6.724428879 | 0.000307479 | 8.53722761  |

|              |              |             |             |             |             |
|--------------|--------------|-------------|-------------|-------------|-------------|
| LOC101927124 | NR_110045    | 49.89704227 | 0.981608322 | 5.37E-05    | 50.83192671 |
| WDR25        | NM_001161476 | 96.40669621 | 1.159556017 | 9.82E-11    | 83.14104262 |
| CCT5         | NM_012073    | 86.77477667 | 6.862162687 | 6.99E-07    | 12.64539776 |
| NUP214       | NM_005085    | 106.7747767 | 1.231343877 | 1.24E-10    | 86.71401924 |
| DIS3L        | NM_001143688 | 109.6319195 | 3.694244851 | 6.91E-10    | 29.67640857 |
| AHCY         | NM_000687    | 133.2844306 | 8.332743843 | 1.01E-10    | 15.99526316 |
| ARV1         | NM_022786    | 87.30502215 | 1.452175212 | 4.10E-10    | 60.12017106 |
| RNMT         | NM_003799    | 83.65251108 | 0.559063869 | 4.09E-11    | 149.6296142 |
| AK8          | NM_152572    | 27.83526763 | 0.044407089 | 0.000476506 | 626.8203583 |
| GLUD1        | NM_005271    | 69.63191953 | 1.353690532 | 5.59E-07    | 51.43858058 |
| PITHD1       | NM_020362    | 157.4079799 | 4.039144644 | 8.10E-17    | 38.97062219 |
| NFE2L1       | NM_003204    | 195.3462052 | 19.66447831 | 1.48E-13    | 9.93396327  |
| C6orf165     | NM_001031743 | 49.63191953 | 0.858743464 | 8.56E-06    | 57.79597936 |
| RRS1         | NM_015169    | 69.63191953 | 16.58299034 | 0.003361406 | 4.198996569 |
| SIAH1        | NM_003031    | 106.2445312 | 3.189982491 | 4.00E-10    | 33.30567848 |
| RPL26        | NM_000987    | 110.4272878 | 11.45592492 | 4.38E-08    | 9.639316642 |
| NOA1         | NM_032313    | 98.46847084 | 3.972968417 | 1.77E-09    | 24.78460952 |
| SIPA1L3      | NM_015073    | 90.69241049 | 1.514786142 | 1.26E-08    | 59.8714287  |
| GNG12        | NM_018841    | 158.2033481 | 1.793150775 | 1.01E-15    | 88.22646168 |
| HIVEP2       | NM_006734    | 31.69369417 | 0.191211463 | 0.000810753 | 165.7520617 |
| ZBTB26       | NM_020924    | 64.18275656 | 0.687866331 | 5.11E-08    | 93.3070186  |
| RPS10-NUDT3  | NM_001202470 | 111.222656  | 2.919713884 | 1.14E-10    | 38.09368328 |
| IFT140       | NM_014714    | 64.4478793  | 1.62621971  | 3.03E-06    | 39.63048713 |
| FOXN3        | NM_001085471 | 75.34620525 | 0.52294445  | 3.86E-08    | 144.0807055 |
| CLMN         | NM_024734    | 51.42857143 | 1.068343323 | 8.72E-06    | 48.13861827 |
| NUP188       | NM_015354    | 175.3462052 | 1.773711199 | 7.49E-19    | 98.85837408 |
| DDX55        | NM_020936    | 167.0398994 | 3.208202359 | 6.41E-18    | 52.06650976 |
| SLC25A4      | NM_001151    | 146.2445312 | 2.277811498 | 1.35E-17    | 64.20396567 |
| IL10RA       | NM_001558    | 77.93822536 | 1.355585879 | 3.98E-09    | 57.49412604 |
| NUDT14       | NM_177533    | 97.14285714 | 5.648180841 | 7.28E-09    | 17.19896368 |
| NARFL        | NM_022493    | 70.42728775 | 6.564179898 | 1.24E-05    | 10.72903072 |
| RGPD8        | NM_001164463 | 91.42857143 | 0.595175254 | 1.97E-11    | 153.6162178 |
| DENND2C      | NM_001256404 | 115.0810825 | 0.457766155 | 1.65E-14    | 251.3970973 |
| SPAG7        | NM_004890    | 84.4478793  | 6.455356483 | 2.26E-07    | 13.08183049 |
| BMP7         | NM_001719    | 77.93822536 | 1.168068008 | 1.37E-07    | 66.72404758 |
| LARS2        | NM_015340    | 84.18275656 | 0.662865505 | 2.01E-09    | 126.9982461 |
| TMEM260      | NM_017799    | 87.03989941 | 0.698935693 | 2.07E-10    | 124.5320567 |
| UQCRCQ       | NM_014402    | 169.6319195 | 18.80096249 | 1.95E-10    | 9.022512523 |
| HDAC1        | NM_004964    | 109.8970423 | 2.941875453 | 4.94E-11    | 37.35611654 |
| SNAPC3       | NM_001039697 | 86.50965393 | 2.285805261 | 1.07E-08    | 37.84646723 |
| ABTB2        | NM_145804    | 141.3256137 | 1.771968684 | 1.30E-13    | 79.75627049 |
| RNASEH2B     | NM_001142279 | 116.1415735 | 1.306607332 | 1.82E-12    | 88.88789355 |
| TTLL12       | NM_015140    | 102.8571429 | 6.146224926 | 1.41E-08    | 16.73501118 |
| POLRMT       | NM_005035    | 101.8558592 | 6.305185255 | 9.94E-09    | 16.1543008  |
| CMTM6        | NM_017801    | 166.5096539 | 4.21256656  | 5.70E-17    | 39.52688974 |
| BMP1         | NR_033404    | 77.93822536 | 2.607548277 | 1.09E-07    | 29.88946592 |
| NUPL2        | NM_007342    | 80.79536822 | 2.990664139 | 1.82E-07    | 27.01586152 |
| KCTD9        | NM_017634    | 63.1222656  | 2.126537553 | 2.75E-06    | 29.68311822 |
| B4GALT1      | NM_001497    | 146.2445312 | 1.999223778 | 2.43E-15    | 73.15065615 |
| ZKSCAN2      | NM_001012981 | 83.65251108 | 0.359887062 | 2.42E-11    | 232.4410069 |
| AEN          | NM_022767    | 67.30502215 | 8.468470226 | 0.000115726 | 7.947719052 |
| THRAP3       | NM_005119    | 152.2239396 | 2.734544433 | 3.55E-15    | 55.66702    |
| FARSA        | NM_004461    | 149.3667968 | 6.413605672 | 1.54E-13    | 23.28905212 |
| INPP5E       | NM_019892    | 112.4890624 | 5.701515953 | 3.46E-10    | 19.72967599 |
| ZNF672       | NM_024836    | 183.1222656 | 7.33236203  | 2.38E-17    | 24.97452592 |
| SRPR         | NM_001177842 | 73.28443061 | 9.758433247 | 6.65E-05    | 7.509856219 |
| CSTF2T       | NM_015235    | 123.6525111 | 1.169352069 | 4.17E-16    | 105.7444668 |
| PTRH1        | NM_001002913 | 92.75418513 | 6.285208786 | 3.74E-07    | 14.75753444 |
| MICALL2      | NM_182924    | 230.162165  | 2.166753336 | 5.64E-27    | 106.2244424 |
| CCDC101      | NM_138414    | 220.2651227 | 0.647843881 | 4.52E-30    | 339.9972268 |
| ADO          | NM_032804    | 89.63191953 | 10.37865394 | 3.45E-06    | 8.636179608 |
| EFCAB14      | NM_014774    | 56.40669621 | 1.010816547 | 7.91E-06    | 55.80309938 |
| AKAP10       | NM_007202    | 101.3256137 | 0.638793116 | 2.63E-12    | 158.6203907 |
| OSMR         | NM_001168355 | 97.93822536 | 1.316661944 | 1.57E-10    | 74.38372912 |

|            |              |             |             |             |             |
|------------|--------------|-------------|-------------|-------------|-------------|
| TUBA1B     | NM_006082    | 166.5096539 | 31.85184305 | 3.03E-08    | 5.227630114 |
| TRIP13     | NM_004237    | 92.75418513 | 1.498367242 | 2.96E-10    | 61.90350572 |
| PDCL3      | NM_024065    | 155.0810825 | 3.469168807 | 5.64E-16    | 44.70266255 |
| ZNF555     | NM_001172775 | 37.14285714 | 0.293892093 | 1.82E-05    | 126.382635  |
| HECA       | NM_016217    | 83.1222656  | 1.680352534 | 1.79E-08    | 49.46715878 |
| DDX20      | NM_007204    | 60.79536822 | 3.411868576 | 2.09E-05    | 17.81878958 |
| LOC93622   | NR_015433    | 83.65251108 | 15.20522568 | 0.000167267 | 5.501563266 |
| TTC23L     | NM_144725    | 86.77477667 | 0.409240055 | 2.87E-11    | 212.0388158 |
| NCAPD3     | NM_015261    | 153.0193079 | 1.164450253 | 7.29E-17    | 131.4090554 |
| ZFAND2A    | NM_182491    | 58.46847084 | 1.138076793 | 2.87E-07    | 51.37480283 |
| GGN        | NM_152657    | 57.14285714 | 11.28047695 | 0.001915523 | 5.065641939 |
| SOX13      | NM_005686    | 198.4684708 | 2.983497277 | 1.19E-20    | 66.52208882 |
| ATP5C1     | NM_001001973 | 121.8558592 | 4.175104341 | 4.56E-12    | 29.18630272 |
| TTC32      | NM_001008237 | 100.2651227 | 10.36164101 | 4.52E-07    | 9.676567892 |
| BBS10      | NM_024685    | 118.2033481 | 1.486143184 | 8.93E-15    | 79.53698496 |
| RPL7       | NM_000971    | 160.0592073 | 5.829951154 | 1.55E-15    | 27.45463951 |
| ZNF330     | NM_001292002 | 84.18275656 | 0.958588286 | 1.38E-10    | 87.8195131  |
| COX16      | NM_001204090 | 118.7335936 | 0.97609559  | 3.24E-14    | 121.6413585 |
| FAM220A    | NM_001037163 | 72.48906239 | 0.689366761 | 7.31E-09    | 105.1531151 |
| NOL9       | NM_024654    | 81.85585918 | 1.097974302 | 3.58E-09    | 74.55170764 |
| MED20      | NM_004275    | 104.9781248 | 1.275051838 | 3.05E-13    | 82.33243672 |
| ZNF213-AS1 | NR_110900    | 69.36679679 | 7.818922544 | 9.32E-05    | 8.871656728 |
| CIDCEP     | NR_002786    | 53.01930787 | 2.023902359 | 3.93E-06    | 26.19657397 |
| TMEM241    | NM_032933    | 98.73359358 | 0.525814736 | 9.46E-12    | 187.7725875 |
| C10orf111  | NM_153244    | 118.9987163 | 0.366097216 | 4.00E-14    | 325.0467665 |
| XRCC6BP1   | NM_033276    | 224.4478793 | 2.496769143 | 1.91E-26    | 89.8953273  |
| XPO1       | NM_003400    | 101.3256137 | 3.930560453 | 9.50E-09    | 25.7789226  |
| CCDC159    | NM_001080503 | 72.75418513 | 2.971679929 | 3.31E-07    | 24.48251053 |
| CAPN7      | NM_014296    | 169.6319195 | 0.467444732 | 2.02E-22    | 362.8919268 |
| YARS2      | NM_001040436 | 98.99871632 | 8.66038001  | 6.68E-08    | 11.43122082 |
| ZBED5-AS1  | NR_034137    | 129.8970423 | 0.044311425 | 4.81E-22    | 2931.457137 |
| ALG6       | NM_013339    | 159.2638391 | 0.365794919 | 4.51E-22    | 435.3910638 |
| C9orf89    | NM_032310    | 84.18275656 | 2.732708069 | 5.67E-08    | 30.80561642 |
| STT3B      | NM_178862    | 157.6731026 | 2.068890731 | 8.31E-16    | 76.21142105 |
| TTC33      | NM_012382    | 41.59073644 | 0.105999486 | 1.57E-06    | 392.3673402 |
| HIF1A-AS1  | NR_047116    | 167.0398994 | 2.414741866 | 2.52E-19    | 69.17505417 |
| RCCD1      | NM_033544    | 98.2033481  | 8.594885016 | 9.98E-08    | 11.42578963 |
| MPP5       | NM_001256550 | 98.2033481  | 1.603562348 | 1.29E-09    | 61.24074205 |
| CXCR4      | NM_003467    | 43.91763382 | 1.946729568 | 0.000198049 | 22.55969937 |
| IMPACT     | NM_018439    | 158.2033481 | 0.603098603 | 1.26E-21    | 262.31755   |
| CNOT11     | NM_017546    | 121.3256137 | 2.008664622 | 3.92E-13    | 60.40113036 |
| ARHGEF35   | NM_001003702 | 179.2638391 | 9.428464937 | 6.19E-16    | 19.01304616 |
| LENG8      | NM_052925    | 161.5907364 | 10.73615544 | 2.78E-13    | 15.05108019 |
| SDHB       | NM_003000    | 55.08108251 | 2.928904238 | 3.57E-05    | 18.80603736 |
| OLA1       | NM_001011708 | 101.060491  | 1.556292532 | 1.23E-09    | 64.93669338 |
| PSMD1      | NR_034059    | 83.91763382 | 1.455898038 | 4.92E-08    | 57.63977397 |
| OAF        | NM_178507    | 57.14285714 | 3.532416943 | 7.43E-05    | 16.17670226 |
| SRP54      | NM_003136    | 92.22393965 | 0.390950924 | 1.27E-12    | 235.8964619 |
| ECHS1      | NM_004092    | 66.24453119 | 1.108547783 | 4.12E-08    | 59.75793935 |
| MEGF8      | NM_001271938 | 136.1415735 | 0.768546056 | 3.67E-16    | 177.1417241 |
| DR1        | NM_001938    | 157.9382254 | 1.863550819 | 1.78E-18    | 84.75123067 |
| LOC145783  | NR_015419    | 69.89704227 | 4.175440756 | 8.78E-06    | 16.74003928 |
| ZSWIM1     | NM_080603    | 78.46847084 | 4.143619254 | 6.33E-07    | 18.93718173 |
| AP5M1      | NR_026895    | 49.89704227 | 2.16990861  | 7.95E-05    | 22.99499713 |
| LANCL2     | NM_018697    | 50.16216501 | 0.934079905 | 5.13E-06    | 53.70222051 |
| MTG1       | NM_138384    | 74.55083703 | 1.094479028 | 2.70E-08    | 68.11536366 |
| USP32      | NM_032582    | 55.61132799 | 0.864488683 | 4.74E-06    | 64.32857833 |
| OAZ1       | NM_004152    | 224.1827566 | 8.081584772 | 1.58E-21    | 27.73994988 |
| PDS5B      | NM_015032    | 54.81595977 | 0.345472115 | 2.44E-06    | 158.6697085 |
| CDH1       | NM_004360    | 177.9382254 | 2.144296795 | 5.07E-18    | 82.982088   |
| ZNF519     | NR_033354    | 60.79536822 | 0.926630881 | 3.85E-07    | 65.60904613 |
| DNAJC28    | NM_001040192 | 137.6731026 | 8.518704219 | 1.09E-11    | 16.16127278 |
| DGAT2      | NM_001253891 | 36.14157347 | 1.303416212 | 0.001420326 | 27.72834427 |
| ELOVL3     | NM_152310    | 51.22265597 | 5.506007823 | 0.000975277 | 9.303048165 |

|             |              |             |             |             |             |
|-------------|--------------|-------------|-------------|-------------|-------------|
| RRN3P2      | NR_003369    | 65.71428571 | 1.342609722 | 1.09E-06    | 48.94518835 |
| YIPF3       | NM_015388    | 101.8558592 | 4.759419667 | 8.27E-10    | 21.40089891 |
| DNPH1       | NM_006443    | 63.91763382 | 7.339396102 | 9.76E-05    | 8.708841018 |
| VPS26B      | NM_052875    | 140.7953682 | 1.556103558 | 7.48E-17    | 90.47943337 |
| MAN1A1      | NM_005907    | 163.9176338 | 1.55768436  | 3.25E-16    | 105.2316105 |
| TMEM223     | NM_001080501 | 175.3462052 | 36.43271958 | 2.19E-07    | 4.812877196 |
| MACC1       | NM_182762    | 22.85714286 | 0.034219293 | 0.001595149 | 667.9606928 |
| ADAMTS14    | NM_080722    | 46.24453119 | 1.734803203 | 0.000323004 | 26.65693211 |
| CTGF        | NM_001901    | 56.40669621 | 7.036407078 | 0.000281854 | 8.016406041 |
| POLG2       | NM_007215    | 131.222656  | 1.880399688 | 1.15E-15    | 69.78444893 |
| CACUL1      | NM_153810    | 50.16216501 | 2.506651636 | 9.12E-05    | 20.01162199 |
| LMNTD2      | NM_173573    | 123.6525111 | 7.313160488 | 1.23E-10    | 16.9082179  |
| GGCX        | NM_000821    | 75.08108251 | 11.24473516 | 5.66E-05    | 6.676998741 |
| UTP11L      | NM_016037    | 125.9794085 | 4.054704249 | 2.70E-12    | 31.06993771 |
| NOL4L       | NM_080616    | 37.40797988 | 1.707868158 | 0.001811178 | 21.9033183  |
| SDHAF1      | NM_001042631 | 113.2844306 | 25.43797049 | 0.000200258 | 4.45335962  |
| PPTC7       | NM_139283    | 38.46847084 | 2.224397438 | 0.002098063 | 17.29388381 |
| CLHC1       | NM_152385    | 57.93822536 | 0.321184876 | 1.58E-07    | 180.3890212 |
| TRNT1       | NM_182916    | 180.7953682 | 2.308151921 | 3.03E-20    | 78.32905911 |
| PLL         | NM_015993    | 57.40797988 | 1.253648464 | 5.78E-06    | 45.79272541 |
| SCYL1       | NM_001048218 | 78.2033481  | 5.50965943  | 3.21E-06    | 14.19386245 |
| ARID2       | NM_152641    | 42.38610466 | 0.506387477 | 6.16E-05    | 83.70290857 |
| LINC00888   | NR_038302    | 101.060491  | 2.485816614 | 2.34E-11    | 40.65484573 |
| CDK12       | NM_016507    | 109.8970423 | 0.341186289 | 1.51E-14    | 322.102751  |
| SYS1-DBNDD2 | NR_003189    | 88.10039037 | 3.086487182 | 1.04E-08    | 28.54390289 |
| SMIM13      | NM_001135575 | 95.08108251 | 0.336761868 | 2.21E-13    | 282.3392178 |
| ZNF443      | NM_005815    | 53.54955335 | 1.664470049 | 4.39E-06    | 32.17213394 |
| DGCR6       | NM_005675    | 101.8558592 | 5.003765753 | 1.72E-09    | 20.35584082 |
| MTHFD1      | NM_005956    | 41.3256137  | 2.495072245 | 0.001230968 | 16.56289263 |
| SHB         | NM_003028    | 134.8159598 | 1.814515476 | 3.47E-13    | 74.29860011 |
| FBXL8       | NM_018378    | 107.0398994 | 11.11590471 | 2.58E-07    | 9.629436578 |
| THOP1       | NM_003249    | 115.8764507 | 3.092945093 | 2.48E-11    | 37.46476165 |
| ALMS1P      | NR_003683    | 20.53024548 | 0.050173258 | 0.003404233 | 409.1870079 |
| CLCF1       | NM_001166212 | 55.08108251 | 5.970778835 | 0.000543786 | 9.225108487 |
| DGCR8       | NM_001190326 | 43.38738834 | 4.793473334 | 0.002765437 | 9.051346553 |
| ACTR8       | NM_022899    | 121.8558592 | 2.207892179 | 1.42E-13    | 55.19103711 |
| ACTR5       | NM_024855    | 104.4478793 | 1.109282878 | 9.58E-13    | 94.15801992 |
| RECQL       | NM_032941    | 57.7323099  | 0.825880723 | 3.84E-06    | 69.90393203 |
| NDUFV2      | NM_021074    | 167.3050222 | 2.606692203 | 1.63E-17    | 64.18288357 |
| NUAK2       | NM_030952    | 203.6525111 | 3.093132658 | 1.00E-22    | 65.84021236 |
| TSR2        | NM_058163    | 43.65251108 | 3.844081007 | 0.00074051  | 11.35577294 |
| KIAA1804    | NM_032435    | 177.4079799 | 0.539042893 | 1.42E-22    | 329.116629  |
| TLL2        | NM_012465    | 87.30502215 | 0.729204517 | 4.59E-10    | 119.726387  |
| PRKAA1      | NM_006251    | 80          | 1.263452112 | 1.70E-08    | 63.31858503 |
| CAT         | NM_001752    | 109.8970423 | 0.537003083 | 7.16E-14    | 204.6488105 |
| PFDN1       | NM_002622    | 55.34620525 | 0.79194416  | 1.65E-06    | 69.88649961 |
| MIA3        | NM_198551    | 60          | 3.086853924 | 1.13E-05    | 19.43726573 |
| DDX27       | NM_017895    | 58.46847084 | 2.084121951 | 9.44E-06    | 28.05424645 |
| LIN7C       | NM_018362    | 117.9382254 | 0.970219351 | 4.63E-16    | 121.5583107 |
| CERS4       | NM_024552    | 129.3667968 | 1.575789215 | 9.13E-14    | 82.09651112 |
| ARL6IP5     | NM_006407    | 57.14285714 | 2.513009181 | 9.65E-06    | 22.7388175  |
| LRRC56      | NM_198075    | 79.26383906 | 2.045817756 | 7.79E-09    | 38.74433039 |
| CUEDC2      | NM_024040    | 109.8970423 | 14.53669741 | 3.81E-07    | 7.559973159 |
| NARS        | NM_004539    | 81.85585918 | 2.926867034 | 1.20E-08    | 27.96705769 |
| SOCS1       | NM_003745    | 174.550837  | 27.82461858 | 1.52E-08    | 6.273251744 |
| ITGB5       | NM_002213    | 46.50965393 | 2.898035798 | 0.000384683 | 16.04868165 |
| NKIRAS1     | NM_020345    | 127.0398994 | 1.393631579 | 5.33E-15    | 91.15744887 |
| ZNF286B     | NM_001145045 | 53.28443061 | 1.201037288 | 9.29E-06    | 44.36534247 |
| KPNA4       | NM_002268    | 69.89704227 | 0.695109916 | 3.06E-08    | 100.5553808 |
| LPP-AS2     | NR_036497    | 103.1222656 | 18.04732876 | 1.78E-05    | 5.713990529 |
| CENPT       | NM_025082    | 97.93822536 | 14.00372213 | 2.33E-06    | 6.993728127 |
| KBTBD8      | NM_032505    | 63.38738834 | 0.280599145 | 6.05E-09    | 225.9001477 |
| 7-Sep       | NM_001011553 | 63.65251108 | 0.416367581 | 1.33E-07    | 152.8757617 |
| OTUD7B      | NM_020205    | 137.6731026 | 1.421061547 | 1.63E-14    | 96.88046441 |

|              |              |             |             |             |             |
|--------------|--------------|-------------|-------------|-------------|-------------|
| CLUHP3       | NR_024034    | 64.18275656 | 4.865779918 | 3.43E-05    | 13.1906411  |
| CCDC130      | NM_030818    | 153.2844306 | 5.318088215 | 7.75E-15    | 28.82322075 |
| GSTP1        | NM_000852    | 129.6319195 | 26.58441768 | 3.42E-06    | 4.87623694  |
| MRPS26       | NM_030811    | 166.5096539 | 10.9533811  | 5.25E-13    | 15.20166717 |
| CINP         | NM_032630    | 124.1827566 | 0.712853723 | 2.15E-17    | 174.2051033 |
| YAEID1       | NM_020192    | 158.4684708 | 2.884335903 | 5.02E-18    | 54.94105963 |
| CDS1         | NM_001263    | 55.87645073 | 1.054371239 | 1.23E-06    | 52.99504449 |
| THOC6        | NM_001142350 | 115.3462052 | 18.55924503 | 2.85E-06    | 6.215026799 |
| HEATR2       | NR_075098    | 41.3256137  | 1.728902334 | 0.001069186 | 23.90280405 |
| NOP58        | NM_015934    | 144.4478793 | 4.057784618 | 7.26E-14    | 35.59771966 |
| ZNF800       | NM_176814    | 82.12098192 | 1.948347452 | 5.60E-09    | 42.1490437  |
| DIAPH1       | NM_005219    | 116.1415735 | 1.567055567 | 9.78E-12    | 74.11452146 |
| TMEM19       | NM_018279    | 156.1415735 | 0.94166028  | 1.95E-21    | 165.8151849 |
| SOWAHC       | NM_023016    | 157.9382254 | 7.701845266 | 7.09E-14    | 20.50654355 |
| LOC101928068 | NR_111907    | 118.2033481 | 12.71135241 | 5.31E-08    | 9.299037919 |
| TXNL1        | NR_024546    | 89.36679679 | 1.178338294 | 9.91E-10    | 75.84137531 |
| SDSL         | NM_138432    | 62.12098192 | 4.24966109  | 1.85E-05    | 14.61786731 |
| EIF2AK3      | NM_004836    | 75.61132799 | 0.692444258 | 5.87E-09    | 109.1948226 |
| PDXDC2P      | NR_003610    | 95.87645073 | 1.182085897 | 7.44E-10    | 81.1078543  |
| BET1         | NM_005868    | 69.63191953 | 0.739772429 | 6.65E-09    | 94.12613507 |
| FLJ30679     | NR_026674    | 122.1209819 | 12.21287069 | 3.31E-08    | 9.99936747  |
| LRRRC8A      | NM_019594    | 112.7541851 | 2.926577259 | 1.72E-11    | 38.52766394 |
| PMVK         | NM_006556    | 56.40669621 | 9.688749111 | 0.001457987 | 5.821876029 |
| TYMS         | NM_001071    | 107.0398994 | 10.38141849 | 5.56E-08    | 10.31072002 |
| MRPS14       | NR_037606    | 50.42728775 | 3.872276588 | 0.000183805 | 13.02264614 |
| EIF2AK4      | NM_001013703 | 164.713002  | 1.100607221 | 1.01E-17    | 149.6564796 |
| SLX4IP       | NM_001009608 | 94.81595977 | 0.257861162 | 1.54E-11    | 367.701592  |
| EVPL         | NM_001988    | 140.32433   | 5.746533693 | 1.28E-12    | 24.41895193 |
| FANCL        | NM_018062    | 157.6731026 | 0.487709828 | 2.13E-20    | 323.2928551 |
| MIR17HG      | NR_027349    | 91.42857143 | 9.31117161  | 1.35E-06    | 9.819233847 |
| SFMBT1       | NM_016329    | 109.6319195 | 0.775079679 | 2.28E-12    | 141.4459991 |
| ERII         | NM_153332    | 64.97812478 | 0.860021533 | 2.79E-07    | 75.55406726 |
| LOC101928438 | NR_109802    | 129.8970423 | 0.287800629 | 1.96E-15    | 451.3438436 |
| ATM          | NM_000051    | 87.57014489 | 0.928194652 | 6.21E-10    | 94.34459105 |
| SIX4         | NM_017420    | 57.40797988 | 6.802509134 | 0.000409927 | 8.439235986 |
| M6PR         | NM_001207024 | 140.5302455 | 7.423920305 | 1.40E-12    | 18.92938498 |
| DIP2B        | NM_173602    | 97.93822536 | 0.659966141 | 8.64E-11    | 148.3988636 |
| B3GNT4       | NM_030765    | 137.4079799 | 25.5094821  | 3.67E-07    | 5.386545259 |
| SLC38A2      | NM_018976    | 141.3256137 | 22.20657595 | 6.68E-08    | 6.36413349  |
| PFDN4        | NM_002623    | 61.06049096 | 1.475506466 | 6.50E-07    | 41.38273358 |
| COX5A        | NM_004255    | 144.1827566 | 3.265088658 | 4.47E-15    | 44.15891012 |
| FAHD2A       | NM_016044    | 141.3256137 | 4.000301003 | 1.99E-14    | 35.32874491 |
| AARS2        | NM_020745    | 116.6718189 | 1.75631815  | 2.37E-13    | 66.42977466 |
| B3GALNT2     | NM_001277155 | 181.3256137 | 2.169431955 | 5.19E-20    | 83.58207009 |
| HUS1         | NM_004507    | 109.1016741 | 1.783995738 | 6.02E-13    | 61.15579298 |
| CBL          | NM_005188    | 151.9588169 | 0.702155183 | 3.09E-18    | 216.4177101 |
| CBX3P2       | NR_033754    | 143.6525111 | 3.193349239 | 5.64E-16    | 44.98490467 |
| RSBN1L       | NM_198467    | 118.4684708 | 1.357788891 | 4.65E-12    | 87.2510238  |
| NAPRT        | NM_001286829 | 144.4478793 | 19.87692187 | 7.09E-09    | 7.267115112 |
| GINM1        | NM_138785    | 115.3462052 | 1.808976874 | 5.56E-13    | 63.7632282  |
| ASF1A        | NM_014034    | 77.67310262 | 5.109450933 | 6.26E-07    | 15.20184921 |
| SETX         | NM_015046    | 124.9781248 | 0.918651273 | 1.09E-14    | 136.0452312 |
| CYP51A1-AS1  | NR_122109    | 100.7953682 | 0.949599299 | 3.92E-11    | 106.1451586 |
| HACE1        | NR_104424    | 106.5096539 | 0.548983288 | 1.77E-12    | 194.0125616 |
| TMOD2        | NM_014548    | 85.71428571 | 1.670355706 | 1.46E-08    | 51.31498962 |
| ANKRD13C     | NM_030816    | 126.5096539 | 1.427771499 | 7.73E-13    | 88.60637293 |
| PSMD5        | NM_001270427 | 108.3655131 | 0.927929453 | 3.17E-13    | 116.78206   |
| LINC01136    | NR_034151    | 138.2033481 | 2.197843626 | 1.21E-16    | 62.88133808 |
| ARL4D        | NM_001661    | 98.46847084 | 10.73829375 | 2.85E-06    | 9.169843287 |
| FKBP10       | NM_021939    | 67.57014489 | 8.894357381 | 0.00011682  | 7.596967605 |
| SLC39A14     | NM_001135153 | 59.26383906 | 1.497526869 | 7.33E-06    | 39.5744746  |
| IRF2BP1      | NM_015649    | 109.1016741 | 17.66581226 | 8.60E-06    | 6.175865136 |
| INTS4        | NM_033547    | 36.14157347 | 0.492334124 | 0.000218032 | 73.40862976 |
| TRADD        | NM_003789    | 106.5096539 | 12.44997781 | 2.18E-07    | 8.55500753  |

|              |              |             |             |             |             |
|--------------|--------------|-------------|-------------|-------------|-------------|
| PEAK1        | NM_024776    | 120.5302455 | 0.025923024 | 7.65E-19    | 4649.544251 |
| NUDCD2       | NM_145266    | 173.5495533 | 4.766698716 | 4.51E-18    | 36.40875241 |
| AMER1        | NM_152424    | 51.95881691 | 1.160974068 | 1.69E-05    | 44.75450259 |
| SAV1         | NM_021818    | 153.2844306 | 0.42386139  | 2.32E-21    | 361.6381068 |
| GABPB1       | NM_002041    | 121.8558592 | 0.986974102 | 2.27E-13    | 123.4640899 |
| C5orf28      | NM_022483    | 136.1415735 | 0.256910972 | 1.02E-19    | 529.9173195 |
| NCBP1        | NM_002486    | 77.93822536 | 4.74440717  | 1.57E-06    | 16.42738968 |
| RELB         | NM_006509    | 42.85714286 | 1.050290734 | 0.000306025 | 40.80502805 |
| LOC100288974 | NR_033857    | 33.01930787 | 1.848198114 | 0.003104586 | 17.86567555 |
| DNAJC17      | NM_018163    | 109.3667968 | 2.464605226 | 3.11E-11    | 44.37497561 |
| ANKRD50      | NM_001167882 | 167.0398994 | 1.221710703 | 4.30E-19    | 136.7262307 |
| LOC100130987 | NR_024469    | 80.79536822 | 5.918696248 | 1.24E-06    | 13.65087256 |
| MTHFD2       | NR_027405    | 223.6525111 | 6.716137634 | 2.85E-21    | 33.30076351 |
| GADD45B      | NM_015675    | 161.5907364 | 23.71029844 | 5.56E-09    | 6.815213095 |
| SPSB1        | NM_025106    | 37.40797988 | 0.639750446 | 0.000200386 | 58.47276871 |
| ARPC5L       | NM_030978    | 143.6525111 | 5.519614545 | 9.22E-14    | 26.02582298 |
| INADL        | NM_176877    | 105.9794085 | 0.254877097 | 4.60E-12    | 415.8059307 |
| FUCA2        | NM_032020    | 42.6512274  | 3.228547783 | 0.000396103 | 13.21065391 |
| MANBAL       | NM_001003897 | 164.713002  | 3.392003479 | 6.58E-17    | 48.55920788 |
| COX20        | NM_198076    | 97.40797988 | 15.60519289 | 4.89E-06    | 6.242023445 |
| CCDC18       | NM_206886    | 124.713002  | 0.81985129  | 8.57E-15    | 152.1166139 |
| LINC00467    | NR_026761    | 137.6731026 | 1.726279002 | 9.35E-15    | 79.7513626  |
| RRAGA        | NM_006570    | 123.9176338 | 11.75378738 | 3.56E-08    | 10.54278334 |
| CACNB4       | NM_001145798 | 26.50965393 | 0.163809094 | 0.004038595 | 161.8326146 |
| SUPT6H       | NM_003170    | 62.38610466 | 1.426123977 | 2.39E-06    | 43.74521827 |
| RNF43        | NM_017763    | 59.79408454 | 2.712480533 | 1.20E-05    | 22.04406034 |
| DCAF15       | NM_138353    | 70.42728775 | 2.729929064 | 3.31E-07    | 25.79821164 |
| SLC27A3      | NM_024330    | 84.4478793  | 20.16025024 | 0.000592596 | 4.188830907 |
| DNAJC27-AS1  | NR_034113    | 123.3873883 | 0.987950729 | 2.04E-13    | 124.8922489 |
| SLC35A4      | NM_080670    | 112.2239396 | 10.60076199 | 5.66E-08    | 10.5864031  |
| RFC1         | NM_001204747 | 70.16216501 | 1.033221461 | 2.98E-08    | 67.90622112 |
| GUF1         | NM_021927    | 130.162165  | 3.019520169 | 2.15E-13    | 43.10690365 |
| RPS11        | NM_001015    | 137.9382254 | 27.03028194 | 7.67E-07    | 5.103099763 |
| KIAA1161     | NM_020702    | 113.2844306 | 1.237675295 | 1.75E-14    | 91.53000876 |
| JAG1         | NM_000214    | 188.8365513 | 5.908319997 | 4.44E-17    | 31.96112455 |
| NMD3         | NM_015938    | 115.0810825 | 3.087830413 | 6.58E-11    | 37.26923669 |
| RPL24        | NM_000986    | 152.2239396 | 10.07338958 | 3.80E-12    | 15.11149137 |
| PKD2         | NM_000297    | 97.40797988 | 0.909352822 | 1.48E-11    | 107.1179167 |
| HEYL         | NM_014571    | 135.8764507 | 2.232677133 | 2.54E-15    | 60.85808319 |
| FBXL3        | NM_012158    | 123.3873883 | 1.609692758 | 1.51E-14    | 76.65275731 |
| COX10        | NM_001303    | 112.2239396 | 0.029833421 | 1.04E-18    | 3761.685275 |
| DCUN1D2      | NM_001014283 | 166.7747767 | 3.159445111 | 1.30E-16    | 52.78609718 |
| GAL          | NM_015973    | 93.28443061 | 3.112359835 | 1.15E-09    | 29.97225113 |
| NPC1         | NM_000271    | 120.32433   | 3.814426139 | 7.39E-11    | 31.54454317 |
| ARHGFE37     | NM_001001669 | 83.91763382 | 1.745586763 | 2.47E-08    | 48.07416945 |
| C10orf76     | NM_024541    | 163.4465956 | 1.106318042 | 1.00E-17    | 147.739248  |
| UBASH3B      | NM_032873    | 167.5701449 | 1.974430701 | 1.12E-16    | 84.870107   |
| XYLB         | NM_005108    | 98.73359358 | 0.489185868 | 7.70E-13    | 201.8324733 |
| PPIL1        | NM_016059    | 109.6319195 | 1.522621529 | 6.96E-13    | 72.00208156 |
| BCL7A        | NM_020993    | 48.83655131 | 2.173698068 | 0.000128161 | 22.46703534 |
| CDC37L1      | NM_017913    | 164.713002  | 1.341207365 | 1.85E-20    | 122.8094971 |
| GPATCH11     | NM_174931    | 63.91763382 | 0.854406171 | 1.09E-07    | 74.80942433 |
| LRWD1        | NM_152892    | 149.6319195 | 9.00025479  | 1.01E-12    | 16.62529817 |
| CTC-338M12.4 | NR_109909    | 141.060491  | 11.67549617 | 5.63E-11    | 12.08175558 |
| NPDC1        | NM_015392    | 112.7541851 | 3.481711717 | 8.80E-12    | 32.38469876 |
| RBBP9        | NM_006606    | 133.8146761 | 2.974213541 | 2.75E-14    | 44.99161686 |
| CTBS         | NM_004388    | 211.9588169 | 3.428849542 | 2.93E-23    | 61.81630728 |
| ANP32B       | NM_006401    | 72.48906239 | 5.441598834 | 5.47E-06    | 13.32128012 |
| HSPA12A      | NM_025015    | 174.8159598 | 2.808889339 | 8.95E-18    | 62.23668457 |
| SMYD5        | NM_006062    | 124.1827566 | 3.0850323   | 3.00E-13    | 40.25330838 |
| PCOLCE2      | NM_013363    | 88.83655131 | 1.708661103 | 8.27E-09    | 51.99190825 |
| APPBP2       | NM_006380    | 233.8146761 | 1.798855323 | 3.34E-25    | 129.9797005 |
| PRKAB1       | NM_006253    | 102.1209819 | 4.756823542 | 3.72E-09    | 21.4683141  |
| SLC7A5       | NM_003486    | 291.9588169 | 5.69660142  | 3.09E-28    | 51.25140332 |

|              |              |             |             |             |             |
|--------------|--------------|-------------|-------------|-------------|-------------|
| NUMBL        | NM_004756    | 89.10167405 | 5.853186641 | 8.42E-08    | 15.22276317 |
| CRACR2A      | NM_032680    | 93.01930787 | 0.465400668 | 1.64E-11    | 199.8693047 |
| RNF139       | NM_007218    | 161.8558592 | 6.675950028 | 9.81E-15    | 24.24461814 |
| THUMPD1      | NM_017736    | 67.03989941 | 4.248928273 | 3.49E-06    | 15.77807275 |
| MGME1        | NM_052865    | 64.4478793  | 2.047703849 | 7.59E-07    | 31.47324225 |
| C17orf59     | NM_017622    | 74.34492157 | 6.23816965  | 7.04E-06    | 11.91774603 |
| LOC100288846 | NR_038935    | 72.75418513 | 2.874711812 | 3.59E-06    | 25.30834041 |
| TIMM17A      | NM_006335    | 111.222656  | 2.566691151 | 8.46E-12    | 43.33308896 |
| SEC61A1      | NM_013336    | 137.9382254 | 7.453116251 | 4.35E-12    | 18.50745657 |
| PABPC1L      | NM_001124756 | 183.3873883 | 2.267451278 | 7.98E-20    | 80.87820458 |
| ATP1A3       | NM_001256214 | 121.060491  | 0.532998245 | 5.27E-16    | 227.1311251 |
| GNB2L1       | NM_006098    | 144.9781248 | 15.68172179 | 7.59E-10    | 9.245038694 |
| REEP6        | NM_138393    | 133.0193079 | 6.927273679 | 7.32E-12    | 19.20225965 |
| PREP         | NM_002726    | 140.2651227 | 1.903238245 | 6.82E-14    | 73.69814215 |
| MEMO1        | NM_015955    | 54.81595977 | 0.75173635  | 3.56E-06    | 72.91912888 |
| EFNB1        | NM_004429    | 95.08108251 | 2.102616577 | 4.45E-10    | 45.22036188 |
| CCS          | NM_005125    | 227.0398994 | 4.461984242 | 7.13E-24    | 50.88316926 |
| TNKS2        | NM_025235    | 138.7335936 | 1.964038615 | 1.74E-14    | 70.63689713 |
| IGF1R        | NM_001291858 | 40.53024548 | 1.112610607 | 0.000178615 | 36.42805957 |
| LOC100507250 | NR_038930    | 91.95881691 | 0.808727945 | 2.41E-12    | 113.7079749 |
| RAD51AP1     | NM_006479    | 37.67310262 | 1.489197408 | 0.00116542  | 25.29758809 |
| BAG2         | NM_004282    | 152.4890624 | 6.580765522 | 1.44E-13    | 23.1719337  |
| BRAP         | NM_006768    | 95.87645073 | 1.647611989 | 3.42E-10    | 58.19115869 |
| SGPL1        | NM_003901    | 71.69369417 | 2.862590536 | 8.37E-07    | 25.04503989 |
| KRTCAP2      | NM_173852    | 97.67310262 | 12.60191309 | 2.50E-06    | 7.750656737 |
| CERK         | NM_022766    | 100.2651227 | 0.229244472 | 1.07E-14    | 437.3720415 |
| INO80E       | NM_173618    | 103.3873883 | 5.103133939 | 1.59E-09    | 20.25958745 |
| SLC25A30-AS1 | NR_047031    | 115.611328  | 8.975504482 | 1.39E-08    | 12.88076099 |
| LOC100133091 | NR_029411    | 94.55083703 | 2.98440188  | 4.21E-09    | 31.68167051 |
| NARS2        | NM_001243251 | 101.060491  | 0.572149896 | 1.11E-11    | 176.6328922 |
| PIGS         | NM_033198    | 131.6936942 | 4.984366066 | 5.48E-12    | 26.42135277 |
| ANKRD36B     | NM_025190    | 109.1016741 | 0.848090268 | 7.86E-13    | 128.6439405 |
| SRP14        | NM_003134    | 121.3256137 | 3.575153059 | 7.38E-13    | 33.93578169 |
| ISY1         | NM_001199469 | 46.77477667 | 0.242821094 | 1.33E-06    | 192.6306152 |
| PSMF1        | NM_006814    | 129.6319195 | 0.990631711 | 1.10E-14    | 130.8578335 |
| WWTR1-AS1    | NR_040250    | 155.611328  | 7.39231774  | 5.06E-14    | 21.05041118 |
| ADCK3        | NM_020247    | 120.7953682 | 0.491158788 | 2.04E-16    | 245.9395436 |
| PPP2CA       | NM_002715    | 75.08108251 | 2.974910761 | 2.09E-07    | 25.2380957  |
| TYK2         | NM_003331    | 123.9176338 | 0.265268712 | 6.81E-18    | 467.1400288 |
| ACYP2        | NM_138448    | 78.73359358 | 0.193700695 | 5.61E-10    | 406.4703729 |
| SUMO2        | NM_006937    | 99.26383906 | 4.678694912 | 1.41E-09    | 21.21613846 |
| HCFC2        | NM_013320    | 115.0810825 | 0.328607767 | 1.17E-16    | 350.2080417 |
| NUTF2        | NM_005796    | 89.36679679 | 5.23988091  | 7.26E-08    | 17.05511982 |
| PDX1         | NM_000209    | 77.67310262 | 3.273992995 | 2.28E-07    | 23.7242727  |
| TCEB3        | NM_003198    | 126.7747767 | 5.75253332  | 3.62E-11    | 22.03807777 |
| EXOSC8       | NM_181503    | 93.28443061 | 3.984893642 | 7.42E-09    | 23.40951578 |
| KBTBD6       | NM_152903    | 129.6319195 | 3.264235883 | 4.07E-14    | 39.71279166 |
| TUBE1        | NM_016262    | 132.7541851 | 2.187934329 | 1.51E-14    | 60.67558034 |
| LOC403323    | NR_122076    | 26.50965393 | 0.147283234 | 0.001095033 | 179.9909817 |
| TUBA1C       | NM_032704    | 255.611328  | 14.52753923 | 1.22E-20    | 17.59495011 |
| PRMT9        | NM_138364    | 64.18275656 | 1.144077924 | 2.12E-06    | 56.09998693 |
| DBIL5P       | NR_024120    | 51.95881691 | 2.921681197 | 7.64E-05    | 17.78387627 |
| PROSER2      | NM_153256    | 138.2033481 | 0.667754412 | 9.77E-17    | 206.9673304 |
| SLFN5        | NM_144975    | 155.0810825 | 2.202376496 | 1.16E-16    | 70.4153367  |
| FCF1         | NM_015962    | 48.83655131 | 1.480828355 | 5.97E-05    | 32.97921136 |
| ZNF862       | NM_001099220 | 115.611328  | 3.323865612 | 6.92E-11    | 34.78219082 |
| DUSP23       | NM_017823    | 87.03989941 | 3.245084817 | 5.64E-08    | 26.82207225 |
| CYBRD1       | NM_001256909 | 106.2445312 | 2.710831026 | 6.47E-11    | 39.19260559 |
| BOLA1        | NM_016074    | 84.4478793  | 12.44514615 | 0.000229562 | 6.785607683 |
| DLG5         | NM_004747    | 38.2033481  | 0.544808579 | 0.000247198 | 70.12251561 |
| CDC42EP2     | NM_006779    | 186.7747767 | 5.165364962 | 6.66E-19    | 36.15906679 |
| PTGER4       | NM_000958    | 123.9176338 | 2.077977391 | 6.51E-14    | 59.63377386 |
| LOC400684    | NR_046201    | 114.550837  | 4.356224729 | 2.50E-11    | 26.29589706 |
| ISL1         | NM_002202    | 92.22393965 | 3.867539862 | 4.65E-09    | 23.8456339  |



|              |              |             |             |             |             |
|--------------|--------------|-------------|-------------|-------------|-------------|
| MTX2         | NM_006554    | 157.6731026 | 1.548646263 | 8.75E-17    | 101.8135041 |
| TNFRSF21     | NM_014452    | 155.611328  | 1.77929276  | 4.96E-16    | 87.45684323 |
| FBXL16       | NM_153350    | 78.2033481  | 12.42268164 | 9.74E-05    | 6.295206653 |
| PSMC1        | NM_002802    | 81.59073644 | 4.797190434 | 1.47E-07    | 17.00802534 |
| FAM188A      | NM_024948    | 117.4079799 | 0.172101978 | 4.14E-17    | 682.2000626 |
| C20orf194    | NM_001009984 | 44.71300204 | 0.094628591 | 4.25E-06    | 472.5104896 |
| AP1M1        | NM_001130524 | 58.73359358 | 1.305994612 | 4.21E-06    | 44.97230926 |
| VPS37C       | NM_017966    | 89.63191953 | 3.462905432 | 5.85E-08    | 25.8834442  |
| TWISTNB      | NM_001002926 | 138.7335936 | 0.159279286 | 2.19E-23    | 871.0083819 |
| FAM229B      | NM_001033564 | 87.30502215 | 0.990578517 | 3.22E-11    | 88.13538821 |
| FAM32A       | NM_014077    | 39.79408454 | 2.814711888 | 0.001597489 | 14.13788911 |
| LOC100147773 | NR_125374    | 96.40669621 | 7.124927032 | 3.55E-08    | 13.53090295 |
| U2SURP       | NM_001080415 | 47.30502215 | 0.319182896 | 2.51E-06    | 148.2066327 |
| LRRC73       | NM_001012974 | 88.83655131 | 8.973010201 | 1.89E-06    | 9.900417955 |
| FUT2         | NM_001097638 | 106.7747767 | 8.930975727 | 1.95E-08    | 11.95555558 |
| KDSR         | NM_002035    | 169.1016741 | 1.937415264 | 7.49E-19    | 87.28210066 |
| MEA1         | NM_014623    | 105.9794085 | 25.66267451 | 0.000377672 | 4.129710191 |
| CCDC136      | NM_001201372 | 97.93822536 | 2.027214323 | 2.39E-10    | 48.31172721 |
| TONSL        | NM_013432    | 208.8365513 | 8.239410767 | 2.79E-19    | 25.34605413 |
| FLJ37035     | NR_033847    | 142.3861047 | 2.209843571 | 1.80E-16    | 64.43266236 |
| VTI1A        | NM_145206    | 213.8146761 | 1.026001941 | 1.06E-22    | 208.3959762 |
| INPP1        | NM_002194    | 76.14157347 | 1.534197619 | 2.90E-08    | 49.62957347 |
| PYCRL        | NM_023078    | 134.8159598 | 13.03712904 | 8.70E-10    | 10.34092394 |
| IRF2BPL      | NM_024496    | 98.46847084 | 18.31941078 | 4.74E-05    | 5.375089409 |
| SBF2-AS1     | NR_036485    | 81.59073644 | 2.223822321 | 3.36E-08    | 36.68941339 |
| MKLN1-AS     | NR_125364    | 44.97812478 | 1.273708323 | 8.28E-05    | 35.31273524 |
| MRPL45P2     | NR_033934    | 69.36679679 | 0.969777237 | 3.01E-07    | 71.52858839 |
| KCTD10       | NM_031954    | 103.6525111 | 2.499109807 | 6.85E-11    | 41.475773   |
| TGFB1        | NM_000660    | 152.2239396 | 5.080682317 | 6.91E-14    | 29.96131821 |
| DNAJC30      | NM_032317    | 98.2033481  | 2.516312315 | 1.69E-10    | 39.02669295 |
| GRIPAP1      | NM_020137    | 63.1222656  | 1.874368588 | 2.18E-06    | 33.676549   |
| MAK16        | NM_032509    | 57.20206442 | 1.714297755 | 3.84E-06    | 33.36763654 |
| PWP2         | NM_005049    | 113.0193079 | 1.621700563 | 3.09E-13    | 69.69184721 |
| IRF7         | NM_001572    | 153.8146761 | 17.52000324 | 4.71E-10    | 8.779374864 |
| IPPK         | NM_022755    | 71.22265597 | 1.467502212 | 4.05E-07    | 48.53325288 |
| EEA1         | NM_003566    | 67.30502215 | 0.374452947 | 4.15E-08    | 179.7422687 |
| NUDT5        | NM_014142    | 98.46847084 | 4.546476247 | 9.25E-09    | 21.65819538 |
| C1orf213     | NR_033690    | 150.4272878 | 21.53069118 | 9.54E-09    | 6.986644623 |
| LPPR2        | NM_001170635 | 137.6731026 | 0.361550382 | 1.57E-20    | 380.7853888 |
| LSM3         | NM_014463    | 29.89704227 | 0.409997603 | 0.00055061  | 72.9200417  |
| KLHDC2       | NM_014315    | 135.3462052 | 6.870857986 | 3.58E-12    | 19.69858866 |
| USP47        | NM_001282659 | 135.611328  | 1.459481968 | 1.47E-13    | 92.91743988 |
| MBTPS1       | NM_003791    | 124.9781248 | 0.401025933 | 4.54E-17    | 311.6459923 |
| LOXL4        | NM_032211    | 38.99871632 | 2.836924517 | 0.000831882 | 13.74682904 |
| C9orf156     | NM_016481    | 95.34620525 | 2.971541008 | 3.40E-09    | 32.0864511  |
| KANK2        | NM_001136191 | 131.9588169 | 2.291593742 | 3.04E-14    | 57.58386162 |
| CUL5         | NM_003478    | 61.06049096 | 0.347429555 | 2.00E-07    | 175.749271  |
| C15orf39     | NM_015492    | 200.7953682 | 4.629960014 | 4.20E-21    | 43.36870461 |
| RPL32P3      | NR_003111    | 52.48906239 | 6.491074558 | 0.001440558 | 8.08634409  |
| LOC220729    | NR_003266    | 38.2033481  | 2.112340431 | 0.001109099 | 18.08579126 |
| ZNF18        | NM_144680    | 172.4890624 | 0.87414249  | 1.05E-23    | 197.3237366 |
| CHUK         | NM_001278    | 127.8352676 | 3.919273557 | 5.86E-12    | 32.61708216 |
| ESD          | NM_001984    | 135.0810825 | 2.364181828 | 5.68E-15    | 57.13650317 |
| BTN2A3P      | NR_027795    | 58.2033481  | 2.872617149 | 2.38E-05    | 20.26143586 |
| PJA1         | NM_001032396 | 86.24453119 | 3.478635783 | 8.08E-09    | 24.79263038 |
| PMM2         | NM_000303    | 92.75418513 | 2.883134432 | 5.24E-09    | 32.17130082 |
| TICRR        | NM_152259    | 69.89704227 | 0.921587172 | 2.96E-08    | 75.84420051 |
| ACTR3C       | NM_001164458 | 38.46847084 | 0.012837006 | 1.52E-06    | 2996.685576 |
| ZC3HC1       | NM_016478    | 106.7747767 | 0.89662659  | 1.51E-12    | 119.0849991 |
| FAM103A1     | NM_031452    | 115.0810825 | 1.713770601 | 2.46E-14    | 67.15080911 |
| CYB5R1       | NM_016243    | 72.48906239 | 5.028487262 | 2.30E-06    | 14.41567983 |
| WDR77        | NM_024102    | 71.95881691 | 0.244757761 | 3.84E-11    | 294.000144  |
| MSL3P1       | NR_024322    | 118.4684708 | 10.90512857 | 1.33E-08    | 10.86355562 |
| PLXNB2       | NM_012401    | 64.18275656 | 7.539973227 | 0.000184198 | 8.512332156 |

|              |              |             |             |             |             |
|--------------|--------------|-------------|-------------|-------------|-------------|
| SLC48A1      | NM_017842    | 117.9382254 | 8.687781795 | 9.70E-10    | 13.57518273 |
| RIN3         | NM_024832    | 67.57014489 | 0.688545423 | 9.76E-08    | 98.13462212 |
| ASB1         | NM_001040445 | 115.611328  | 3.724495434 | 6.41E-11    | 31.04080272 |
| NT5DC3       | NM_001031701 | 134.550837  | 1.285579195 | 2.31E-14    | 104.6616479 |
| SLC6A17      | NM_001010898 | 152.4890624 | 0.962031457 | 1.14E-17    | 158.5073557 |
| CTDSP2       | NM_005730    | 69.10167405 | 3.909926442 | 7.26E-06    | 17.6733949  |
| ADPRHL1      | NM_199162    | 120.5302455 | 1.137497358 | 2.11E-14    | 105.9609015 |
| TRIM28       | NM_005762    | 134.550837  | 8.816588752 | 6.78E-11    | 15.26109937 |
| C15orf56     | NM_001039905 | 85.24324752 | 10.12911307 | 1.83E-05    | 8.415667484 |
| SMG5         | NM_015327    | 189.3667968 | 3.265480605 | 2.76E-19    | 57.99048279 |
| EIF2S2       | NM_003908    | 115.8764507 | 6.801099641 | 7.06E-10    | 17.03789929 |
| FUK          | NM_145059    | 118.2033481 | 5.969397579 | 6.34E-10    | 19.80155393 |
| GALNS        | NM_000512    | 186.5096539 | 3.608139393 | 2.83E-18    | 51.69136599 |
| XAB2         | NM_020196    | 61.06049096 | 6.048114068 | 0.000148198 | 10.09579024 |
| NDUFA6-AS1   | NR_034118    | 92.22393965 | 0.349725875 | 2.45E-13    | 263.7035069 |
| ZBTB40       | NM_014870    | 49.63191953 | 0.637802759 | 8.90E-06    | 77.81703482 |
| ERCC6        | NM_000124    | 126.5096539 | 0.489871802 | 5.64E-16    | 258.2505331 |
| IDH3A        | NM_005530    | 130.6924105 | 1.837641053 | 1.51E-15    | 71.11966197 |
| ULBP2        | NM_025217    | 92.48906239 | 2.76781635  | 3.16E-10    | 33.41589567 |
| LAMB2        | NM_002292    | 44.4478793  | 3.877509748 | 0.000868564 | 11.46299615 |
| UBE2D4       | NM_015983    | 192.7541851 | 3.184073935 | 5.61E-20    | 60.53696901 |
| CAPNS1       | NM_001749    | 149.8970423 | 8.563272806 | 2.12E-12    | 17.50464404 |
| AGPAT6       | NM_178819    | 170.162165  | 2.448159957 | 2.42E-18    | 69.50614667 |
| GOLT1A       | NM_198447    | 24.4478793  | 0.629284204 | 0.001747383 | 38.85029873 |
| BUB1B        | NM_001211    | 84.4478793  | 0.310792823 | 1.10E-11    | 271.7175981 |
| SMU1         | NM_018225    | 64.71300204 | 2.028019357 | 1.45E-06    | 31.90945975 |
| DECR2        | NM_020664    | 97.40797988 | 1.114941396 | 7.52E-12    | 87.36600888 |
| SMAD4        | NM_005359    | 131.9588169 | 0.593745542 | 2.53E-17    | 222.248097  |
| TATDN2       | NM_014760    | 182.1209819 | 1.674512612 | 1.34E-21    | 108.7605913 |
| NKD2         | NM_033120    | 34.28571429 | 0.622858383 | 0.000204298 | 55.04576192 |
| RUSC1-AS1    | NM_001039517 | 135.3462052 | 25.3334843  | 5.86E-07    | 5.342581528 |
| POLR2J       | NM_006234    | 90.16216501 | 2.57879561  | 7.75E-10    | 34.96289688 |
| GNS          | NM_002076    | 72.48906239 | 0.901927913 | 1.34E-07    | 80.37123734 |
| TAX1BP3      | NM_014604    | 167.3050222 | 22.06944722 | 2.90E-10    | 7.580843349 |
| TMTC2        | NM_152588    | 66.50965393 | 0.074096477 | 3.38E-08    | 897.6088527 |
| LMAN2        | NM_006816    | 152.7541851 | 3.176013092 | 6.42E-16    | 48.09620764 |
| CNPPD1       | NM_015680    | 112.4890624 | 4.645019496 | 4.89E-11    | 24.21713461 |
| ACOT8        | NM_005469    | 106.2445312 | 1.627455104 | 8.10E-13    | 65.28261882 |
| FBF1         | NM_001080542 | 241.5907364 | 0.53065212  | 8.44E-36    | 455.2714056 |
| USP24        | NM_015306    | 121.3256137 | 0.879008075 | 1.59E-13    | 138.0255962 |
| LYRM5        | NM_001001660 | 115.3462052 | 7.852226559 | 1.65E-09    | 14.68961757 |
| PRIM1        | NM_000946    | 89.89704227 | 2.194633638 | 1.19E-09    | 40.96220923 |
| FAM96B       | NR_024525    | 113.0193079 | 5.259468921 | 1.36E-10    | 21.48873005 |
| MAGOH        | NM_002370    | 39.5289618  | 3.863586664 | 0.003224724 | 10.23115702 |
| RPAP1        | NM_015540    | 101.060491  | 2.627842828 | 1.45E-10    | 38.45758578 |
| CLIP2        | NM_003388    | 112.2239396 | 1.494932391 | 4.50E-11    | 75.06957526 |
| PDSS1        | NM_014317    | 106.7747767 | 2.463896015 | 1.02E-10    | 43.33574795 |
| YRDC         | NM_024640    | 74.55083703 | 8.893464418 | 4.73E-05    | 8.382654219 |
| KLF3-AS1     | NR_026804    | 55.08108251 | 1.865775836 | 3.41E-05    | 29.52181149 |
| LOC101060553 | NR_120398    | 165.2432475 | 0.866676018 | 2.65E-23    | 190.6632284 |
| STXBP3       | NM_007269    | 163.9176338 | 1.321638639 | 6.08E-18    | 124.0260605 |
| PATL1        | NM_152716    | 34.28571429 | 0.598661153 | 0.00021542  | 57.27065157 |
| RBM15B       | NM_013286    | 89.10167405 | 11.32943168 | 3.63E-06    | 7.864619918 |
| TRIM4        | NM_033017    | 154.0797988 | 3.571770213 | 2.27E-15    | 43.13821709 |
| FAHD2B       | NM_199336    | 135.8764507 | 2.383908414 | 4.28E-16    | 56.99734516 |
| MAP1S        | NM_018174    | 75.08108251 | 2.792972593 | 4.71E-07    | 26.8821408  |
| CDCA2        | NM_152562    | 84.18275656 | 2.360465086 | 3.29E-08    | 35.66363131 |
| TANC1        | NM_033394    | 207.0398994 | 1.730008034 | 3.59E-20    | 119.6756866 |
| SDF2L1       | NM_022044    | 112.4890624 | 13.0904119  | 3.14E-07    | 8.593240857 |
| MAP1LC3B     | NM_022818    | 83.91763382 | 6.399488097 | 8.98E-07    | 13.11317914 |
| TTC12        | NM_017868    | 117.4079799 | 0.23702487  | 1.84E-17    | 495.3403416 |
| MKI67        | NM_001145966 | 49.89704227 | 5.375679335 | 0.000833302 | 9.281997522 |
| PI4K2B       | NM_018323    | 117.9382254 | 1.65979668  | 1.50E-12    | 71.05582675 |
| C1GALT1      | NM_020156    | 163.1222656 | 1.189342931 | 4.50E-18    | 137.1532645 |

|           |              |             |             |             |             |
|-----------|--------------|-------------|-------------|-------------|-------------|
| C10orf107 | NM_173554    | 24.4478793  | 0.088088002 | 0.001596169 | 277.5392637 |
| NLN       | NM_020726    | 152.2239396 | 1.380711566 | 1.25E-15    | 110.2503545 |
| TIPIN     | NM_001289986 | 109.8970423 | 1.544983487 | 7.98E-13    | 71.13153196 |
| PBK       | NM_001278945 | 53.01930787 | 1.127838434 | 1.13E-05    | 47.0096658  |
| CEP135    | NM_025009    | 58.46847084 | 0.18155047  | 9.37E-08    | 322.0507826 |
| SPAG5     | NM_006461    | 55.61132799 | 1.902943971 | 1.53E-05    | 29.22383887 |
| FAM227B   | NM_152647    | 75.34620525 | 0.103296609 | 1.92E-09    | 729.4160577 |
| RLF       | NM_012421    | 118.7335936 | 0.750157667 | 1.51E-14    | 158.2781844 |
| MRPL51    | NM_016497    | 109.8970423 | 11.20173135 | 2.98E-06    | 9.810719331 |
| POLR2A    | NM_000937    | 304.1827566 | 4.865324475 | 5.11E-31    | 62.52054887 |
| STARD5    | NM_181900    | 109.6319195 | 3.525699564 | 2.39E-11    | 31.0950827  |
| FAR1      | NM_032228    | 121.5907364 | 0.192484118 | 2.24E-18    | 631.6923056 |
| FGF9      | NM_002010    | 89.10167405 | 2.47650697  | 4.51E-09    | 35.97876974 |
| PPP2CB    | NM_001009552 | 55.34620525 | 2.846776416 | 2.92E-05    | 19.44171131 |
| TST       | NM_001270483 | 75.34620525 | 15.82846339 | 0.0004564   | 4.760171811 |
| PLCD3     | NM_133373    | 74.55083703 | 5.315982705 | 1.94E-06    | 14.02390511 |
| OBFC1     | NM_024928    | 170.4272878 | 4.099194536 | 1.40E-16    | 41.57579892 |
| ATP5B     | NM_001686    | 201.5907364 | 5.910377815 | 1.24E-20    | 34.10792723 |
| SMNDC1    | NM_005871    | 50.16216501 | 4.093130045 | 0.000224518 | 12.25520921 |
| CYB5B     | NM_030579    | 124.713002  | 6.41160093  | 1.98E-10    | 19.45114853 |
| FERMT1    | NM_017671    | 83.1222656  | 2.68291786  | 3.80E-08    | 30.98203893 |
| MPHOSPH8  | NM_017520    | 66.50965393 | 1.334993515 | 1.01E-06    | 49.8202075  |
| LOC344967 | NR_027277    | 123.9176338 | 2.086017552 | 7.72E-14    | 59.40392673 |
| OGFOD1    | NM_018233    | 67.30502215 | 1.668332767 | 3.28E-07    | 40.34268432 |
| ZMYM4     | NM_005095    | 48.83655131 | 0.2351445   | 6.28E-06    | 207.6874064 |
| GRHL2     | NM_024915    | 124.4478793 | 1.294398614 | 2.08E-12    | 96.14339663 |
| CHKB      | NM_005198    | 98.2033481  | 15.02176041 | 1.15E-05    | 6.537406097 |
| BEND6     | NM_152731    | 26.50965393 | 0.698306389 | 0.00419737  | 37.96278305 |
| MTERF4    | NM_182501    | 121.060491  | 5.283912835 | 2.32E-11    | 22.91114459 |
| MCC       | NM_001085377 | 56.14157347 | 0.80540661  | 2.94E-06    | 69.70587623 |
| DDI2      | NM_032341    | 161.8558592 | 1.642966885 | 2.76E-18    | 98.51437704 |
| TVP23C    | NM_145301    | 112.2239396 | 1.514923429 | 1.32E-11    | 74.07895178 |
| ATP1B1    | NM_001677    | 115.0810825 | 4.449288228 | 1.03E-10    | 25.8650545  |
| FAM8A1    | NM_016255    | 80          | 3.722975141 | 9.71E-08    | 21.48819076 |
| RAB25     | NM_020387    | 84.97812478 | 5.735375544 | 2.09E-07    | 14.81648832 |
| POLR2E    | NM_002695    | 70.95753323 | 9.952136514 | 5.89E-05    | 7.129879411 |
| DDX59     | NM_001031725 | 81.85585918 | 1.109337744 | 1.76E-09    | 73.7880412  |
| POR       | NM_000941    | 172.7541851 | 2.377284542 | 1.11E-17    | 72.66870334 |
| HSPA9     | NM_004134    | 44.97812478 | 4.206614849 | 0.001244534 | 10.69223744 |
| WDR75     | NM_032168    | 121.3256137 | 0.60149075  | 2.39E-15    | 201.7081952 |
| HEBP2     | NM_014320    | 126.7747767 | 0.992342807 | 6.27E-17    | 127.7530061 |
| SETD5     | NM_001292043 | 48.83655131 | 2.346610604 | 0.000177103 | 20.81152758 |
| RBM15     | NM_001201545 | 83.91763382 | 5.430808127 | 2.26E-07    | 15.45214485 |
| CLIC3     | NM_004669    | 98.46847084 | 13.6797273  | 1.22E-05    | 7.198131126 |
| CWC22     | NM_020943    | 78.46847084 | 0.495077466 | 8.48E-10    | 158.4973591 |
| CREG1     | NM_003851    | 134.0797988 | 3.695965236 | 1.86E-13    | 36.27734307 |
| ANKS1A    | NM_015245    | 85.97940845 | 1.236243575 | 2.37E-09    | 69.54892237 |
| SLC2A12   | NM_145176    | 29.63191953 | 0.87551826  | 0.002087333 | 33.84500458 |
| CASC10    | NM_001010911 | 61.85585918 | 5.539531026 | 3.10E-05    | 11.16626279 |
| HIATL1    | NM_032558    | 108.8365513 | 0.431187372 | 7.98E-14    | 252.411268  |
| RANBP10   | NM_020850    | 107.0398994 | 1.214330059 | 7.22E-11    | 88.14728633 |
| TMEM59    | NM_004872    | 49.36679679 | 1.209136436 | 4.30E-05    | 40.82814424 |
| RPL30     | NM_000989    | 147.5701449 | 6.491019776 | 1.02E-13    | 22.73450859 |
| MRPS24    | NM_032014    | 78.46847084 | 6.857641176 | 3.67E-06    | 11.44248712 |
| EPCAM     | NM_002354    | 113.0193079 | 4.087468329 | 3.24E-11    | 27.65019782 |
| RHPN1     | NM_052924    | 198.4684708 | 10.00972072 | 8.90E-17    | 19.82757326 |
| PAPLN     | NM_173462    | 86.77477667 | 1.654156057 | 5.49E-09    | 52.45863974 |
| CCND1     | NM_053056    | 135.3462052 | 17.68499903 | 1.25E-08    | 7.653164415 |
| EIF4EBP2  | NM_004096    | 161.060491  | 5.150276696 | 9.70E-15    | 31.27220157 |
| TPTE2P1   | NR_026730    | 35.34620525 | 0.18894074  | 6.42E-05    | 187.0756156 |
| IFT46     | NM_001168618 | 38.2033481  | 0.43870755  | 3.40E-05    | 87.08158347 |
| C7orf43   | NM_018275    | 143.1222656 | 17.59021166 | 5.47E-09    | 8.136472056 |
| LIPT2     | NM_001144869 | 203.6525111 | 13.44530212 | 5.85E-15    | 15.14674116 |
| LINC00637 | NR_038436    | 157.4079799 | 4.672594356 | 2.38E-16    | 33.68749091 |

|              |              |             |             |             |             |
|--------------|--------------|-------------|-------------|-------------|-------------|
| NAA15        | NM_057175    | 47.30502215 | 1.654159714 | 0.000163665 | 28.5976147  |
| LOC642852    | NR_026943    | 92.48906239 | 11.75464687 | 3.29E-06    | 7.868297826 |
| FAM58A       | NM_001130997 | 31.69369417 | 2.056464488 | 0.004212891 | 15.41173911 |
| CDK7         | NM_001799    | 73.54955335 | 0.074865914 | 1.63E-12    | 982.4170893 |
| CATSPER2P1   | NR_002318    | 138.4684708 | 1.179778726 | 4.56E-18    | 117.3681706 |
| MCM6         | NM_005915    | 92.75418513 | 3.689897131 | 3.96E-08    | 25.13733631 |
| C9orf85      | NM_182505    | 49.89704227 | 0.282702145 | 2.08E-06    | 176.5004023 |
| ALKBH4       | NM_017621    | 53.28443061 | 3.821983075 | 6.97E-05    | 13.94156634 |
| MYCBP        | NM_012333    | 79.26383906 | 2.141215554 | 2.21E-08    | 37.01815024 |
| STARD9       | NM_020759    | 94.81595977 | 1.088829876 | 1.75E-10    | 87.0806008  |
| ZFAND3       | NM_021943    | 72.48906239 | 0.807244877 | 8.24E-08    | 89.79810772 |
| DCAF12       | NM_015397    | 115.8764507 | 2.134748451 | 2.32E-12    | 54.28107966 |
| ARL1         | NM_001177    | 68.63063585 | 1.357484167 | 6.25E-08    | 50.55722748 |
| LINC00657    | NR_027451    | 235.3462052 | 5.651627752 | 4.47E-25    | 41.64219859 |
| SREK1IP1     | NM_173829    | 126.5096539 | 0.569554162 | 2.40E-15    | 222.1204975 |
| JMJD7        | NM_001114632 | 141.8558592 | 0.560299677 | 4.61E-21    | 253.178549  |
| KCNK6        | NM_004823    | 115.611328  | 3.685413455 | 1.68E-11    | 31.36997501 |
| IMPA2        | NM_014214    | 172.2239396 | 1.651433852 | 4.65E-19    | 104.2875193 |
| KRII         | NM_023008    | 138.7335936 | 9.703448107 | 5.40E-11    | 14.29734998 |
| WDR3         | NM_006784    | 95.87645073 | 1.055891677 | 3.21E-11    | 90.80140777 |
| SLC31A2      | NM_001860    | 72.48906239 | 4.336199626 | 1.73E-06    | 16.71718755 |
| TMED7-TICAM2 | NM_001164468 | 55.61132799 | 2.678196238 | 4.01E-05    | 20.76447095 |
| THUMPD3-AS1  | NR_027007    | 166.5096539 | 14.25156904 | 2.39E-12    | 11.68360153 |
| ZNF674-AS1   | NR_015378    | 43.91763382 | 2.587952379 | 0.000860369 | 16.97003166 |
| TUFM         | NM_003321    | 81.59073644 | 7.551535522 | 2.28E-06    | 10.80452263 |
| TMEM104      | NM_017728    | 90.95753323 | 2.329589963 | 5.19E-09    | 39.044439   |
| RNF114       | NM_018683    | 168.8365513 | 0.449458098 | 1.39E-25    | 375.6446977 |
| TOMM20L      | NM_207377    | 33.54955335 | 0.490134872 | 5.16E-05    | 68.44963553 |
| MIS18BP1     | NM_018353    | 121.060491  | 2.156246864 | 1.98E-12    | 56.14407746 |
| FAM118A      | NM_001104595 | 115.8764507 | 7.231386963 | 1.21E-09    | 16.02409763 |
| ANKRA2       | NM_023039    | 126.7747767 | 1.341719462 | 2.59E-15    | 94.48679864 |
| LINC00884    | NR_033929    | 72.48906239 | 4.058540582 | 6.64E-06    | 17.86086918 |
| BTC          | NM_001729    | 43.91763382 | 0.326286693 | 1.19E-05    | 134.5982989 |
| CCDC157      | NM_001017437 | 135.8764507 | 6.801620467 | 3.84E-12    | 19.97707037 |
| ELL          | NM_006532    | 84.4478793  | 1.935168424 | 2.24E-08    | 43.63851654 |
| ALDH9A1      | NM_000696    | 149.6319195 | 1.513224161 | 5.06E-17    | 98.88285117 |
| ATF6         | NM_007348    | 64.4478793  | 0.333591973 | 1.08E-07    | 193.1937351 |
| ZFHX4        | NM_024721    | 30.42728775 | 0.194749493 | 0.000799029 | 156.2380847 |
| MED16        | NM_005481    | 120.5302455 | 4.544613239 | 2.34E-11    | 26.52156281 |
| ATXN1L       | NM_001137675 | 70.95753323 | 3.330447657 | 8.48E-07    | 21.30570438 |
| DEGS1        | NM_003676    | 152.2239396 | 1.095197216 | 1.44E-20    | 138.9922632 |
| SRSF9        | NM_003769    | 107.3050222 | 6.342983357 | 2.22E-09    | 16.91712182 |
| RAB11B       | NM_004218    | 57.93822536 | 0.42110108  | 1.44E-07    | 137.5874536 |
| GTF2H2       | NM_001515    | 218.4684708 | 2.098341548 | 3.28E-24    | 104.1148287 |
| SYNGR2       | NM_004710    | 157.9382254 | 27.39716325 | 2.53E-08    | 5.764765642 |
| FNBP1        | NM_015033    | 115.0810825 | 0.634660084 | 3.78E-13    | 181.3271158 |
| ENTPD1-AS1   | NR_038444    | 66.50965393 | 0.874851695 | 3.44E-07    | 76.02391846 |
| GABRE        | NM_004961    | 88.57142857 | 1.33340219  | 2.97E-10    | 66.42514108 |
| POLR2J3      | NM_001097615 | 106.7747767 | 2.271867759 | 3.97E-11    | 46.99867598 |
| EMC8         | NM_006067    | 159.7940845 | 5.467589329 | 6.73E-15    | 29.22569252 |
| GCSH         | NR_033249    | 155.8764507 | 6.622210631 | 5.22E-14    | 23.53843141 |
| FSCN1        | NM_003088    | 276.6718189 | 11.87658965 | 1.24E-24    | 36.29556102 |
| FLOT2        | NM_004475    | 147.0398994 | 3.985558131 | 5.59E-15    | 33.89317646 |
| GPD1L        | NM_015141    | 58.73359358 | 0.854449158 | 3.95E-07    | 68.738547   |
| CCDC97       | NM_052848    | 195.611328  | 7.957334254 | 7.28E-18    | 24.58251994 |
| HNRNPUL1     | NM_144732    | 74.55083703 | 3.962152841 | 2.88E-06    | 18.81573983 |
| PDCD7        | NM_005707    | 118.4684708 | 2.621296239 | 2.28E-12    | 45.19461368 |
| LOC646626    | NR_045484    | 109.8970423 | 17.18704916 | 6.95E-06    | 6.394177455 |
| TMEM198      | NM_001005209 | 35.87645073 | 3.760889682 | 0.004266239 | 9.539352057 |
| KLHL7-AS1    | NR_046220    | 110.4272878 | 8.114151312 | 7.07E-09    | 13.60922215 |
| UBFD1        | NM_019116    | 41.3256137  | 4.577240616 | 0.004147449 | 9.028499301 |
| FAM122A      | NM_138333    | 114.8159598 | 0.373020497 | 2.66E-16    | 307.8006719 |
| PDS5A        | NM_001100399 | 89.10167405 | 1.633406589 | 1.74E-08    | 54.54959875 |
| PCIF1        | NM_022104    | 163.6525111 | 7.348991643 | 1.28E-14    | 22.26870284 |

|                |              |             |             |             |             |
|----------------|--------------|-------------|-------------|-------------|-------------|
| PDP2           | NM_020786    | 89.63191953 | 0.742444764 | 2.90E-12    | 120.725371  |
| C7orf25        | NM_024054    | 99.26383906 | 11.14905349 | 1.13E-06    | 8.903342253 |
| CIT            | NM_007174    | 70.16216501 | 0.164242066 | 5.09E-09    | 427.1875444 |
| IMPDH2         | NM_000884    | 196.4066962 | 30.7030721  | 1.10E-10    | 6.39697212  |
| KIAA0922       | NM_015196    | 120.5302455 | 1.55233736  | 9.98E-12    | 77.64436299 |
| EMC10          | NM_206538    | 148.6306359 | 3.226238851 | 3.20E-16    | 46.06932181 |
| MSH3           | NM_002439    | 190.162165  | 0.743588782 | 2.10E-21    | 255.735656  |
| A4GALT         | NM_017436    | 100.5302455 | 2.699822924 | 1.83E-10    | 37.23586631 |
| DAK            | NM_015533    | 197.6731026 | 7.017617497 | 2.40E-18    | 28.16812155 |
| TMEM189-UBE2V1 | NM_199203    | 112.2239396 | 6.756260921 | 8.08E-09    | 16.610362   |
| NUP205         | NM_015135    | 87.03989941 | 0.751284811 | 4.32E-10    | 115.8547306 |
| SLC25A53       | NM_001012755 | 37.40797988 | 0.394777424 | 0.000110099 | 94.75714071 |
| IBA57          | NM_001010867 | 132.7541851 | 1.928703892 | 7.12E-15    | 68.83077577 |
| COMMD2         | NM_016094    | 84.4478793  | 2.653817212 | 1.39E-08    | 31.82128706 |
| CASC3          | NM_007359    | 37.67310262 | 1.746167352 | 0.001639942 | 21.57473772 |
| ZFYVE20        | NM_022340    | 61.06049096 | 1.050213008 | 2.01E-06    | 58.14105375 |
| PRR14L         | NM_173566    | 146.7747767 | 2.714780334 | 1.01E-14    | 54.06506553 |
| VAC14          | NM_018052    | 89.89704227 | 1.103055619 | 5.61E-10    | 81.49819529 |
| KLF2           | NM_016270    | 94.81595977 | 20.42004448 | 0.000119067 | 4.643278806 |
| ATP6V1G1       | NM_004888    | 95.34620525 | 2.306351273 | 3.41E-10    | 41.34071266 |
| HILPDA         | NM_001098786 | 147.8352676 | 4.600582361 | 7.56E-15    | 32.13403349 |
| LOC728613      | NR_003713    | 89.10167405 | 0.504908201 | 3.41E-12    | 176.4710375 |
| EIF4B          | NM_001300821 | 50.42728775 | 7.193259946 | 0.001871543 | 7.010352487 |
| HTATSF1        | NM_014500    | 60.53024548 | 0.472521261 | 7.40E-08    | 128.1005755 |
| LOC100131655   | NR_040024    | 111.6936942 | 2.148708189 | 3.66E-12    | 51.98178828 |
| DIO3           | NM_001362    | 57.40797988 | 9.267626769 | 0.002011442 | 6.194463946 |
| ZDHHC6         | NM_022494    | 178.9987163 | 0.802718157 | 1.08E-24    | 222.9907405 |
| SLC35E2B       | NM_001290264 | 121.8558592 | 3.650475785 | 1.13E-11    | 33.38081564 |
| TOP2B          | NM_001068    | 37.40797988 | 0.749034154 | 0.00020276  | 49.94162108 |
| DIEXF          | NM_014388    | 55.34620525 | 2.056471589 | 2.36E-05    | 26.91318739 |
| NAV1           | NM_001167738 | 50.16216501 | 0.467865966 | 3.23E-06    | 107.2148193 |
| LINC00568      | NR_051960    | 92.48906239 | 5.731556443 | 4.79E-08    | 16.13681437 |
| ZPR1           | NM_003904    | 129.1016741 | 2.573218086 | 4.45E-14    | 50.17129125 |
| ARHGAP5-AS1    | NR_027263    | 118.2033481 | 23.03824521 | 6.28E-05    | 5.130744423 |
| SAP30L-AS1     | NR_037897    | 95.61132799 | 1.090897947 | 5.07E-10    | 87.64461265 |
| ZDHHC23        | NM_173570    | 60.26512274 | 0.552587957 | 1.04E-07    | 109.0597832 |
| CHRNA5         | NM_000745    | 127.0398994 | 1.809971561 | 3.91E-14    | 70.18889257 |
| KPNA6          | NM_012316    | 83.1222656  | 1.377169153 | 2.51E-08    | 60.35733912 |
| LOC100131347   | NR_036551    | 113.0193079 | 2.277976369 | 1.27E-12    | 49.61390706 |
| ZNF487         | NR_026693    | 34.81595977 | 0.941882769 | 0.000402956 | 36.96421776 |
| CPNE3          | NM_003909    | 149.3667968 | 2.578423887 | 1.43E-15    | 57.92949621 |
| TRIM62         | NM_018207    | 65.97940845 | 1.949840303 | 1.48E-06    | 33.8383653  |
| LOC285074      | NR_026846    | 84.4478793  | 1.972176894 | 1.11E-08    | 42.81962717 |
| FANCG          | NM_004629    | 136.1415735 | 12.67714013 | 5.39E-10    | 10.73913928 |
| OIP5-AS1       | NR_026757    | 126.5096539 | 4.647175654 | 1.13E-11    | 27.22291201 |
| TMX4           | NM_021156    | 160.7953682 | 1.380849162 | 1.29E-18    | 116.446729  |
| BRIP1          | NM_032043    | 120.0592073 | 0.25472378  | 6.12E-15    | 471.3309731 |
| C9orf41-AS1    | NR_121183    | 44.18275656 | 2.035304474 | 0.000518882 | 21.70818034 |
| ING3           | NM_019071    | 83.38738834 | 1.887629249 | 6.58E-09    | 44.17572381 |
| PIBF1          | NM_006346    | 86.77477667 | 0.287298488 | 4.19E-10    | 302.0370112 |
| ZNF696         | NM_030895    | 208.3655131 | 5.043128861 | 1.23E-21    | 41.31671406 |
| LOC102724301   | NR_120587    | 39.79408454 | 5.921066764 | 0.003712217 | 6.720762681 |
| LOC101927919   | NR_110854    | 53.54955335 | 1.486426078 | 4.45E-06    | 36.02570901 |
| MYL12A         | NM_006471    | 57.67310262 | 8.822957458 | 0.001142821 | 6.536708683 |
| PGM2L1         | NM_173582    | 134.8159598 | 0.366916564 | 2.47E-18    | 367.4294731 |
| BCL9L          | NM_182557    | 77.14285714 | 12.9498142  | 0.000105766 | 5.957062856 |
| BOK            | NM_032515    | 115.611328  | 6.844749533 | 6.02E-10    | 16.89051257 |
| ORMDL2         | NM_014182    | 99.26383906 | 16.78839968 | 1.28E-05    | 5.912644503 |
| HSDL1          | NM_031463    | 129.3667968 | 3.534284926 | 9.40E-13    | 36.6033864  |
| LINC01278      | NR_015353    | 43.65251108 | 0.303475634 | 3.65E-05    | 143.8418976 |
| EGR1           | NM_001964    | 137.6731026 | 30.50072723 | 3.39E-06    | 4.513764593 |
| ATP13A1        | NM_020410    | 86.24453119 | 2.082032417 | 1.76E-09    | 41.42324129 |
| ANKRD32        | NM_032290    | 90.95753323 | 0.055989745 | 3.54E-15    | 1624.539169 |
| LRRC57         | NM_153260    | 190.162165  | 4.992758102 | 1.84E-20    | 38.08759831 |

|              |              |             |             |             |             |
|--------------|--------------|-------------|-------------|-------------|-------------|
| DHTKD1       | NM_018706    | 92.75418513 | 1.466786958 | 1.96E-09    | 63.23630343 |
| EIF2B1       | NM_001414    | 78.46847084 | 7.644529248 | 4.43E-06    | 10.26465702 |
| MRPL47       | NM_177988    | 78.46847084 | 0.470791712 | 1.29E-10    | 166.6734328 |
| MTHFR        | NM_005957    | 70.69241049 | 6.421025036 | 2.15E-05    | 11.00952108 |
| CCNE2        | NM_057749    | 180.5894528 | 4.864646938 | 3.41E-18    | 37.12282825 |
| SNHG22       | NR_117096    | 111.6936942 | 2.792951626 | 1.68E-11    | 39.99127415 |
| SLC5A6       | NR_028323    | 152.7541851 | 4.541355168 | 3.27E-15    | 33.63625602 |
| PNPT1        | NM_033109    | 78.73359358 | 0.410230941 | 1.63E-10    | 191.9250495 |
| PCNXL2       | NM_014801    | 99.26383906 | 0.435516588 | 3.22E-11    | 227.9220628 |
| B3GNT5       | NM_032047    | 55.34620525 | 2.641969745 | 2.05E-05    | 20.94884143 |
| TVP23B       | NM_016078    | 143.3873883 | 4.224819641 | 5.21E-14    | 33.93929221 |
| FAM83G       | NM_001039999 | 94.81595977 | 2.290917939 | 8.32E-10    | 41.38775909 |
| CCNB1        | NM_031966    | 56.40669621 | 4.680929313 | 5.80E-05    | 12.05032002 |
| SLC27A1      | NM_198580    | 83.91763382 | 5.870309561 | 4.49E-07    | 14.29526551 |
| NXT1         | NM_013248    | 59.26383906 | 7.811427886 | 0.000235712 | 7.586812543 |
| AKAP8        | NM_005858    | 151.6936942 | 3.639703957 | 3.56E-15    | 41.67748145 |
| GNPTAB       | NM_024312    | 87.30502215 | 1.000492135 | 3.02E-10    | 87.26207743 |
| NEAT1        | NR_028272    | 195.611328  | 47.334553   | 7.44E-08    | 4.132527205 |
| FAF1         | NM_007051    | 106.7747767 | 0.589302755 | 2.08E-11    | 181.188321  |
| XXYLT1       | NM_152531    | 167.5701449 | 1.21173683  | 6.53E-17    | 138.2892231 |
| PDCD5        | NM_004708    | 161.3256137 | 5.249819116 | 5.03E-16    | 30.72974709 |
| RSRP1        | NM_020317    | 197.9382254 | 12.97789346 | 9.32E-16    | 15.25195333 |
| KIF5B        | NM_004521    | 258.7335936 | 2.134425369 | 1.15E-29    | 121.2193208 |
| SOD1         | NM_000454    | 160.7953682 | 6.521232315 | 2.90E-15    | 24.65720595 |
| ETV5         | NM_004454    | 117.9382254 | 2.839104822 | 1.13E-11    | 41.5406379  |
| HNRNPA3      | NM_194247    | 44.97812478 | 7.114924475 | 0.00412567  | 6.32165878  |
| ZFP91        | NM_053023    | 51.95881691 | 0.989269131 | 3.32E-06    | 52.5224282  |
| SLC17A5      | NM_012434    | 73.01930787 | 0.912534466 | 7.32E-09    | 80.01813695 |
| LRRC3        | NM_030891    | 34.28571429 | 3.486186934 | 0.00458429  | 9.834732026 |
| DTD2         | NM_080664    | 127.0398994 | 3.174227019 | 7.72E-14    | 40.02231052 |
| RPL23A       | NM_000984    | 127.0398994 | 20.55796845 | 4.35E-07    | 6.179594046 |
| PRDX4        | NM_006406    | 72.48906239 | 1.375246498 | 4.92E-08    | 52.70986873 |
| KCTD3        | NM_016121    | 56.14157347 | 0.367577144 | 1.76E-07    | 152.7341248 |
| ARF3         | NM_001659    | 149.6319195 | 3.799216566 | 3.92E-15    | 39.3849408  |
| UBAC2-AS1    | NR_036532    | 158.7335936 | 11.83268774 | 9.69E-13    | 13.41483838 |
| SLC8B1       | NM_024959    | 227.8352676 | 3.502306102 | 1.05E-23    | 65.05292827 |
| SLC35G1      | NM_153226    | 212.4890624 | 2.12751649  | 2.74E-26    | 99.876576   |
| FABP5P3      | NR_002935    | 46.50965393 | 2.926381844 | 0.000311949 | 15.89322802 |
| MED29        | NM_017592    | 120.5302455 | 11.32071873 | 4.14E-09    | 10.64687219 |
| XKR8         | NM_018053    | 181.8558592 | 3.455072969 | 1.62E-20    | 52.63444819 |
| LOC100134868 | NR_004846    | 64.18275656 | 1.425497245 | 2.59E-07    | 45.02481978 |
| DDA1         | NM_024050    | 52.22393965 | 3.980246466 | 0.000248575 | 13.12078036 |
| PPP1R15A     | NM_014330    | 162.3861047 | 10.6857032  | 4.12E-13    | 15.19657636 |
| SNW1         | NM_012245    | 53.54955335 | 3.577694305 | 4.39E-05    | 14.96761567 |
| DNAJC24      | NM_181706    | 104.713002  | 0.597206401 | 1.95E-13    | 175.3380438 |
| JPH1         | NM_020647    | 59.26383906 | 2.340301241 | 1.28E-05    | 25.32316696 |
| TUBG1        | NM_001070    | 67.03989941 | 15.33334292 | 0.001704412 | 4.37216462  |
| C5orf42      | NM_023073    | 152.7541851 | 0.324307082 | 3.13E-19    | 471.0171116 |
| ZNF202       | NM_003455    | 97.67310262 | 0.86516467  | 1.67E-12    | 112.8953897 |
| NHLRC2       | NM_198514    | 81.59073644 | 1.583549562 | 2.39E-08    | 51.52395503 |
| USP53        | NM_019050    | 203.6525111 | 0.390146994 | 7.58E-28    | 521.9891842 |
| SRRD         | NM_001013694 | 109.3667968 | 2.207174688 | 6.71E-13    | 49.55058492 |
| LRRC59       | NM_018509    | 198.9987163 | 7.626618865 | 2.23E-18    | 26.09265257 |
| ANKRD39      | NM_016466    | 181.8558592 | 1.937605446 | 1.00E-22    | 93.85598062 |
| MANF         | NM_006010    | 113.2844306 | 10.85959244 | 2.71E-08    | 10.43173869 |
| TMEM62       | NM_024956    | 98.2033481  | 0.77410328  | 6.76E-11    | 126.8607829 |
| TMLHE        | NM_001184797 | 74.81595977 | 0.387941586 | 5.40E-09    | 192.8536731 |
| NAT9         | NM_015654    | 133.8146761 | 10.33769381 | 9.70E-11    | 12.94434509 |
| F3           | NM_001993    | 100         | 5.530708473 | 9.07E-09    | 18.08086622 |
| CAND1        | NM_018448    | 95.34620525 | 1.273311454 | 4.29E-10    | 74.88050546 |
| GALNT7       | NM_017423    | 80          | 0.848848023 | 5.54E-09    | 94.2453747  |
| ADCK5        | NM_174922    | 267.5701449 | 5.381926546 | 6.66E-28    | 49.71642452 |
| SCOC-AS1     | NR_033939    | 47.30502215 | 0.508256721 | 8.03E-06    | 93.07308731 |
| TAF5         | NM_006951    | 109.8970423 | 3.644930396 | 1.75E-10    | 30.15065593 |

|                |              |             |             |             |             |
|----------------|--------------|-------------|-------------|-------------|-------------|
| HSP90B1        | NM_003299    | 101.8558592 | 3.284935715 | 3.83E-10    | 31.00695661 |
| GPCPD1         | NM_019593    | 71.69369417 | 0.673475941 | 1.14E-08    | 106.4532373 |
| SPPL2B         | NM_001077238 | 115.8764507 | 1.361112547 | 1.02E-13    | 85.13362911 |
| LINC00839      | NR_026827    | 43.91763382 | 0.405697515 | 3.72E-06    | 108.2521637 |
| GTF3C4         | NM_012204    | 74.81595977 | 3.096808071 | 9.17E-07    | 24.15905605 |
| SHPK           | NM_013276    | 112.7541851 | 2.154440287 | 3.86E-12    | 52.33572069 |
| NABP2          | NM_024068    | 87.03989941 | 3.195927584 | 9.86E-09    | 27.23462817 |
| ASNA1          | NM_004317    | 61.59073644 | 1.026059096 | 8.71E-08    | 60.02650012 |
| LIMD2          | NM_030576    | 54.81595977 | 10.11210525 | 0.003655647 | 5.420825675 |
| LOC101927592   | NR_104646    | 31.95881691 | 0.072674096 | 0.000300008 | 439.7552727 |
| HAT1           | NR_027862    | 93.01930787 | 0.497539523 | 5.76E-12    | 186.9586304 |
| PIGB           | NM_004855    | 116.1415735 | 2.155206537 | 1.75E-12    | 53.88883685 |
| DNTTIP2        | NM_014597    | 87.57014489 | 0.44530329  | 2.44E-13    | 196.6528135 |
| MTG2           | NM_015666    | 75.34620525 | 2.10028027  | 5.94E-08    | 35.8743575  |
| SP4            | NM_003112    | 51.42857143 | 0.080605934 | 1.22E-07    | 638.0246298 |
| ACSL4          | NM_004458    | 86.50965393 | 1.510080166 | 2.01E-08    | 57.2881201  |
| RNF10          | NM_014868    | 81.3256137  | 2.083093035 | 4.93E-08    | 39.04079767 |
| MRPS10         | NM_018141    | 80.79536822 | 3.253143647 | 6.74E-08    | 24.83608994 |
| SSSCA1         | NM_006396    | 46.50965393 | 4.316366893 | 0.001895872 | 10.77518549 |
| SCAF11         | NM_004719    | 135.8764507 | 1.447552885 | 1.79E-14    | 93.866312   |
| CCDC23         | NM_199342    | 120         | 4.706840454 | 1.27E-11    | 25.49480934 |
| PLCG1-AS1      | NR_109889    | 60.53024548 | 4.841102008 | 7.39E-05    | 12.5034022  |
| KLHL35         | NM_001039548 | 67.03989941 | 11.67470612 | 0.000674362 | 5.742320085 |
| UBQLN2         | NM_013444    | 97.67310262 | 3.453020924 | 1.62E-09    | 28.28627592 |
| SART3          | NM_014706    | 24.71300204 | 0.816129192 | 0.003591528 | 30.28074754 |
| LOC101927572   | NM_001290056 | 99.5289618  | 2.839638796 | 2.52E-10    | 35.04986689 |
| UCP2           | NM_003355    | 95.61132799 | 0.262045556 | 3.29E-15    | 364.8652901 |
| CCDC147-AS1    | NR_108036    | 69.36679679 | 0.632094004 | 1.83E-08    | 109.7412669 |
| ZNF263         | NM_005741    | 36.40669621 | 1.612628892 | 0.000461319 | 22.57599153 |
| NCL            | NM_005381    | 187.0398994 | 8.852407624 | 1.03E-16    | 21.12870389 |
| PDZD7          | NM_001195263 | 70.95753323 | 6.489840445 | 2.39E-05    | 10.93363294 |
| ZNF252P-AS1    | NR_026974    | 196.1415735 | 13.94140607 | 4.33E-15    | 14.06899508 |
| GLYR1          | NM_032569    | 101.8558592 | 2.595622689 | 1.94E-10    | 39.24139653 |
| ZNF792         | NM_175872    | 39.26383906 | 1.610293991 | 0.000191356 | 24.38302527 |
| NUDCD3         | NM_015332    | 107.8352676 | 1.849815191 | 1.11E-10    | 58.29515734 |
| C15orf38-AP3S2 | NM_001199058 | 50.16216501 | 3.599072924 | 0.000103156 | 13.93752393 |
| TMEM63A        | NM_014698    | 161.3256137 | 5.79490963  | 4.54E-14    | 27.83919405 |
| RARS           | NM_002887    | 175.3462052 | 1.065686847 | 9.47E-22    | 164.5382092 |
| LOC154761      | NR_015421    | 75.08108251 | 1.852027196 | 7.17E-08    | 40.53994599 |
| HIAT1          | NM_033055    | 132.2239396 | 2.090919526 | 6.24E-14    | 63.23722076 |
| ESAM           | NM_138961    | 101.060491  | 5.769551758 | 4.42E-09    | 17.5161772  |
| SDF4           | NM_016176    | 92.22393965 | 3.11947529  | 5.22E-09    | 29.56392697 |
| SDHAP3         | NR_003263    | 91.95881691 | 0.477330365 | 3.53E-12    | 192.6523507 |
| RAD18          | NM_020165    | 58.2033481  | 0.467117514 | 6.04E-07    | 124.6010828 |
| PLD2           | NM_002663    | 126.2445312 | 3.930000252 | 9.04E-13    | 32.12328832 |
| PDCD11         | NM_014976    | 141.5907364 | 5.00647392  | 4.17E-13    | 28.28152881 |
| KDEL1C1        | NM_024089    | 64.71300204 | 0.961717947 | 6.25E-08    | 67.28896164 |
| DESI1          | NM_015704    | 186.2445312 | 5.835346    | 1.58E-17    | 31.91662177 |
| MGAT2          | NM_002408    | 153.0193079 | 6.018842279 | 3.31E-14    | 25.42337891 |
| GREB1L         | NM_001142966 | 93.01930787 | 0.39880322  | 1.05E-10    | 233.2461302 |
| ASF1B          | NM_018154    | 164.713002  | 4.534770804 | 2.56E-16    | 36.32223306 |
| FAM66C         | NR_026788    | 55.87645073 | 1.154716096 | 3.13E-06    | 48.38977384 |
| POLR2B         | NM_000938    | 63.91763382 | 0.915771595 | 1.53E-07    | 69.79647997 |
| IARS2          | NM_018060    | 178.4684708 | 1.006064691 | 7.89E-21    | 177.3926393 |
| CDCA8          | NM_001256875 | 84.4478793  | 1.460670656 | 5.06E-10    | 57.81445596 |
| C10orf10       | NM_007021    | 164.713002  | 11.45980304 | 5.96E-13    | 14.37310934 |
| LRRC41         | NM_006369    | 106.5096539 | 7.30724892  | 1.21E-08    | 14.57588965 |
| SLC2A1-AS1     | NR_033967    | 44.4478793  | 2.596212995 | 0.000212213 | 17.12027456 |
| CIRH1A         | NM_032830    | 94.81595977 | 1.18771639  | 1.98E-10    | 79.83047178 |
| MYO9A          | NM_006901    | 169.3667968 | 0.039093804 | 3.40E-26    | 4332.318105 |
| BOK-AS1        | NR_033346    | 146.2445312 | 5.825416426 | 9.56E-14    | 25.10456258 |
| LOC100505549   | NM_001242804 | 63.91763382 | 1.735460092 | 2.90E-06    | 36.83036799 |
| SAT2           | NM_133491    | 123.1222656 | 20.94224406 | 5.56E-06    | 5.879134311 |
| FANCM          | NM_020937    | 89.63191953 | 1.20915397  | 4.11E-09    | 74.12779657 |

|              |              |             |             |             |             |
|--------------|--------------|-------------|-------------|-------------|-------------|
| NUP88        | NM_002532    | 136.4066962 | 3.240095903 | 2.47E-13    | 42.09958603 |
| TMEM101      | NM_032376    | 78.73359358 | 11.88135914 | 3.58E-05    | 6.626648742 |
| MTFMT        | NM_139242    | 175.0810825 | 3.406635376 | 6.88E-18    | 51.39413621 |
| FAM64A       | NM_019013    | 83.38738834 | 4.420942902 | 1.06E-07    | 18.86190122 |
| ARFGEF2      | NM_006420    | 106.5096539 | 1.771175168 | 2.29E-10    | 60.13501987 |
| WBP4         | NM_007187    | 163.9176338 | 0.815825205 | 3.55E-22    | 200.9224928 |
| NDUFB7       | NM_004146    | 78.46847084 | 9.325330381 | 3.21E-05    | 8.414551296 |
| GPSM2        | NM_013296    | 97.93822536 | 0.298273302 | 1.06E-13    | 328.3506263 |
| ITGB8        | NM_002214    | 43.1222656  | 0.500897053 | 3.73E-05    | 86.09007646 |
| ZNF517       | NM_213605    | 175.0810825 | 3.182529611 | 9.64E-20    | 55.01318256 |
| FTSJ2        | NM_013393    | 103.6525111 | 1.543744011 | 1.01E-12    | 67.1435875  |
| LINC00998    | NR_024412    | 44.18275656 | 3.908897383 | 0.002409799 | 11.30312521 |
| RAB33B       | NM_031296    | 175.0810825 | 1.798829102 | 3.29E-20    | 97.3305815  |
| RHOF         | NM_019034    | 108.6306359 | 12.9608969  | 1.68E-07    | 8.381413467 |
| CDK4         | NM_000075    | 75.08108251 | 12.01908038 | 0.000190129 | 6.246824226 |
| FAM126A      | NM_032581    | 129.3667968 | 0.320613542 | 1.08E-17    | 403.4976066 |
| SCO1         | NM_004589    | 106.7747767 | 1.990005469 | 2.83E-12    | 53.65551922 |
| KIAA0195     | NM_014738    | 53.01930787 | 2.401867936 | 3.61E-05    | 22.07419778 |
| LIX1L        | NM_153713    | 49.63191953 | 0.512991353 | 1.08E-06    | 96.75001199 |
| ARHGAP31     | NM_020754    | 41.3256137  | 2.078766336 | 0.00130898  | 19.87987442 |
| ARID5A       | NM_212481    | 105.2794085 | 1.487034184 | 5.64E-13    | 71.26897929 |
| ZNF852       | NM_001287349 | 117.9382254 | 2.676715611 | 5.45E-13    | 44.06079781 |
| FAM219B      | NM_020447    | 73.54955335 | 15.84420484 | 0.000981397 | 4.642047618 |
| LINC01232    | NR_110731    | 52.75418513 | 9.229149587 | 0.004355822 | 5.716039667 |
| LGALS1       | NM_014181    | 63.65251108 | 10.09689079 | 0.000324264 | 6.304169512 |
| NFKB1A       | NM_020529    | 188.8365513 | 16.11186803 | 1.08E-13    | 11.72033876 |
| ICMT         | NM_012405    | 117.6731026 | 7.620202452 | 2.00E-09    | 15.44225411 |
| MMP11        | NM_005940    | 100.5302455 | 6.433856312 | 1.03E-08    | 15.62519282 |
| UBA6-AS1     | NR_015439    | 57.93822536 | 0.282377955 | 9.65E-09    | 205.1797047 |
| RNF220       | NM_018150    | 46.50965393 | 1.056317655 | 4.28E-05    | 44.02998825 |
| C7orf26      | NM_024067    | 84.97812478 | 1.245867524 | 3.86E-10    | 68.20799412 |
| KISS1R       | NM_032551    | 37.93822536 | 3.948954632 | 0.002473264 | 9.607156551 |
| PIGL         | NM_004278    | 133.5495533 | 1.506064624 | 1.33E-13    | 88.67451714 |
| SLC7A6OS     | NM_032178    | 104.713002  | 4.303350307 | 5.40E-10    | 24.33290217 |
| LOC100996654 | NR_110040    | 123.9176338 | 0.878951362 | 2.77E-14    | 140.9834937 |
| DDX1         | NM_004939    | 138.2033481 | 2.376021091 | 1.28E-14    | 58.16587597 |
| TAF1D        | NM_024116    | 132.4890624 | 9.646957924 | 1.36E-10    | 13.73376596 |
| ASAH2B       | NM_001079516 | 179.5289618 | 0.9312391   | 1.86E-24    | 192.7850342 |
| RNF11        | NM_014372    | 121.060491  | 1.714777325 | 3.92E-13    | 70.59837401 |
| FASTKD1      | NR_104020    | 63.38738834 | 0.296194701 | 9.13E-09    | 214.0058152 |
| VPS37B       | NM_024667    | 121.5907364 | 4.751496907 | 1.97E-11    | 25.58998539 |
| ALKBH1       | NM_006020    | 41.59073644 | 0.559853125 | 1.64E-05    | 74.28865634 |
| MTMR4        | NM_004687    | 47.0991067  | 3.398144259 | 0.000268754 | 13.86024345 |
| KDM4D        | NM_018039    | 57.93822536 | 0.323120426 | 2.01E-08    | 179.3084579 |
| KIAA1468     | NM_020854    | 133.0193079 | 0.982949532 | 2.65E-15    | 135.3266913 |
| KIAA0368     | NM_001080398 | 77.93822536 | 1.353900999 | 1.97E-07    | 57.56567533 |
| ZNF346       | NM_012279    | 87.30502215 | 2.497310475 | 7.16E-09    | 34.95961877 |
| ARHGEF26-AS1 | NR_037901    | 109.6319195 | 0.114811298 | 2.92E-16    | 954.8878996 |
| BRCA2        | NM_000059    | 155.0810825 | 0.622391225 | 2.62E-19    | 249.1697767 |
| PRKAR2A      | NM_004157    | 150.6924105 | 0.423535099 | 1.59E-19    | 355.7967472 |
| MTMR9LP      | NR_026850    | 81.3256137  | 14.94276029 | 0.000153872 | 5.442475963 |
| RGS2         | NM_002923    | 190.6924105 | 10.66730651 | 1.69E-16    | 17.87634117 |
| CWF19L1      | NM_018294    | 84.18275656 | 1.672532221 | 1.12E-08    | 50.33251706 |
| WDR45B       | NM_019613    | 95.34620525 | 2.680285561 | 1.17E-09    | 35.57315185 |
| EHD2         | NM_014601    | 149.6319195 | 5.997606986 | 4.49E-13    | 24.94860365 |
| CCDC137      | NM_199287    | 185.773493  | 14.01631798 | 3.45E-14    | 13.25408665 |
| TRIM25       | NM_005082    | 215.3462052 | 2.453519079 | 4.32E-24    | 87.7703406  |
| MZT2B        | NM_025029    | 77.67310262 | 10.82978728 | 6.25E-05    | 7.172172508 |
| TBL2         | NM_012453    | 112.4890624 | 6.279002817 | 1.79E-09    | 17.91511577 |
| KLHL20       | NM_014458    | 156.4066962 | 0.75229031  | 3.44E-18    | 207.9073651 |
| MFS1D2       | NM_174983    | 80.79536822 | 1.740527553 | 2.41E-09    | 46.42004552 |
| MRPL41       | NM_032477    | 146.2445312 | 14.66114731 | 3.63E-06    | 9.974971813 |
| VASN         | NM_138440    | 124.713002  | 10.15176182 | 1.44E-09    | 12.28486289 |
| KIAA1919     | NM_153369    | 117.9382254 | 3.473873469 | 7.10E-12    | 33.95006365 |



|             |              |             |             |             |             |
|-------------|--------------|-------------|-------------|-------------|-------------|
| PPID        | NM_005038    | 141.3256137 | 1.988456723 | 2.54E-16    | 71.0730146  |
| PKP3        | NM_007183    | 107.5701449 | 2.005201968 | 1.75E-12    | 53.64554125 |
| WWTR1       | NM_015472    | 96.40669621 | 2.100672627 | 2.58E-09    | 45.89325104 |
| RPRD1A      | NM_018170    | 65.773493   | 1.938790298 | 2.86E-06    | 33.92501658 |
| USP22       | NM_015276    | 124.713002  | 6.664843621 | 2.19E-10    | 18.71206725 |
| HEATR1      | NM_018072    | 35.34620525 | 1.427700128 | 0.003692713 | 24.75744349 |
| ATP5D       | NM_001687    | 95.08108251 | 12.83564879 | 8.86E-06    | 7.407579004 |
| FAM216A     | NM_013300    | 53.01930787 | 3.282799944 | 2.74E-05    | 16.15063628 |
| SLC35F2     | NM_017515    | 100.5302455 | 1.895639494 | 4.98E-10    | 53.03236496 |
| AK1         | NM_000476    | 74.81595977 | 4.416084462 | 6.33E-07    | 16.94169584 |
| RAB20       | NM_017817    | 152.4890624 | 1.471064831 | 2.33E-17    | 103.6589681 |
| NR4A2       | NM_006186    | 130.9575332 | 0.103947986 | 2.57E-21    | 1259.837139 |
| ESPL1       | NM_012291    | 59.5289618  | 3.094052005 | 6.92E-06    | 19.23980648 |
| UFC1        | NM_016406    | 66.24453119 | 10.90498433 | 0.000409373 | 6.0747021   |
| PER2        | NM_022817    | 31.69369417 | 0.24091193  | 0.000300008 | 131.5571802 |
| ARC         | NM_015193    | 209.1016741 | 25.76352305 | 6.58E-13    | 8.116191007 |
| ABCA3       | NM_001089    | 40.26512274 | 0.044022934 | 1.96E-06    | 914.639694  |
| DOCK5       | NM_024940    | 132.4890624 | 1.186633907 | 3.39E-14    | 111.6511686 |
| PEX6        | NM_000287    | 104.1827566 | 8.582054464 | 7.82E-08    | 12.13960561 |
| RNF223      | NM_001205252 | 135.611328  | 6.816725756 | 4.31E-12    | 19.8939099  |
| MALT1       | NM_173844    | 120.2651227 | 0.738999284 | 1.41E-14    | 162.7405132 |
| FAM162A     | NM_014367    | 187.5701449 | 1.508003921 | 1.87E-23    | 124.3830618 |
| SUDS3       | NM_022491    | 49.36679679 | 0.947630218 | 6.89E-06    | 52.0950006  |
| TUSC2       | NM_007275    | 93.54955335 | 5.370906607 | 1.60E-08    | 17.41783282 |
| CDC73       | NM_024529    | 144.713002  | 1.809762467 | 1.72E-14    | 79.96242859 |
| ERO1LB      | NM_019891    | 87.83526763 | 0.176349067 | 6.98E-13    | 498.0761688 |
| COG2        | NM_007357    | 86.77477667 | 0.836644172 | 1.47E-10    | 103.7176611 |
| CCDC57      | NM_198082    | 110.162165  | 4.778015682 | 1.27E-09    | 23.05604928 |
| BIK         | NM_001197    | 120         | 10.16467812 | 2.70E-09    | 11.8055878  |
| TMEM57      | NM_001282564 | 43.91763382 | 1.36742076  | 0.000528207 | 32.11713256 |
| DDRGK1      | NM_023935    | 222.1209819 | 6.127584214 | 5.14E-22    | 36.24935605 |
| RHOT2       | NM_138769    | 46.50965393 | 0.420193314 | 1.32E-06    | 110.6863255 |
| CHD9        | NM_025134    | 77.67310262 | 0.534887086 | 1.29E-08    | 145.2140175 |
| FAM105A     | NM_019018    | 51.95881691 | 1.075000551 | 3.02E-05    | 48.33375839 |
| GINS4       | NM_032336    | 138.2033481 | 3.031875775 | 9.77E-15    | 45.5834468  |
| OSGIN1      | NM_182981    | 205.773493  | 1.665298813 | 5.04E-27    | 123.5655075 |
| STAG3L2     | NR_040584    | 143.9176338 | 4.069882405 | 3.10E-15    | 35.3616197  |
| SELT        | NM_016275    | 156.1415735 | 1.638475383 | 1.04E-18    | 95.29686872 |
| CC2D1A      | NM_017721    | 77.67310262 | 1.184736392 | 1.13E-08    | 65.56150649 |
| SRFBP1      | NM_152546    | 49.10167405 | 0.33480899  | 3.18E-06    | 146.6557815 |
| PTPN9       | NM_002833    | 73.28443061 | 1.17884762  | 2.45E-08    | 62.16616074 |
| MRPS9       | NM_182640    | 103.3873883 | 0.770155754 | 1.11E-12    | 134.2421813 |
| FRAT1       | NM_005479    | 126.7747767 | 1.99616843  | 1.62E-14    | 63.50905804 |
| CDKL2       | NM_003948    | 34.55083703 | 0.289875563 | 0.000180826 | 119.1919618 |
| GRB2        | NM_002086    | 176.4066962 | 2.909197318 | 8.60E-18    | 60.63758381 |
| AP3S1       | NM_001284    | 101.8558592 | 0.781136273 | 1.95E-12    | 130.3944813 |
| TOR4A       | NM_017723    | 90.42728775 | 5.356898549 | 2.98E-08    | 16.8805302  |
| FBXL14      | NM_152441    | 61.06049096 | 0.857493375 | 1.34E-06    | 71.20811981 |
| WBSCR27     | NM_152559    | 175.0810825 | 11.57340402 | 8.74E-14    | 15.12788132 |
| ZCCHC8      | NM_017612    | 107.0398994 | 3.453249288 | 7.07E-10    | 30.99686425 |
| RTN4RL2     | NM_178570    | 71.69369417 | 4.159130573 | 2.31E-06    | 17.23766371 |
| POFUT1      | NM_172236    | 132.7541851 | 3.622679402 | 1.22E-13    | 36.64530321 |
| KPNA2       | NM_002266    | 157.4671872 | 6.582772853 | 1.59E-14    | 23.92110296 |
| LOC646719   | NR_046262    | 184.1827566 | 8.703459431 | 1.78E-16    | 21.16201701 |
| TMEM184C    | NM_018241    | 138.7335936 | 1.71415323  | 4.57E-16    | 80.93418436 |
| NDUFA6      | NM_002490    | 61.06049096 | 14.97690064 | 0.004598388 | 4.076977768 |
| ZNF496      | NM_032752    | 58.2033481  | 2.352597093 | 1.36E-05    | 24.74004082 |
| BAIAP2L1    | NM_018842    | 132.4890624 | 3.043646543 | 8.75E-13    | 43.52971363 |
| CHURC1-FNTB | NM_001202559 | 50.16216501 | 3.088701564 | 0.000111218 | 16.24053472 |
| TUBB6       | NM_032525    | 132.4890624 | 4.346244679 | 3.94E-13    | 30.48357195 |
| RBM42       | NM_024321    | 49.89704227 | 2.441229794 | 2.97E-05    | 20.43930579 |
| NOP56       | NR_027700    | 209.8970423 | 20.309072   | 2.15E-14    | 10.33513704 |
| RUVBL1      | NM_003707    | 123.9176338 | 2.287140405 | 6.94E-13    | 54.18016032 |
| BNIP3       | NM_004052    | 66.50965393 | 1.781302929 | 2.57E-07    | 37.33764362 |

|                |              |             |             |             |             |
|----------------|--------------|-------------|-------------|-------------|-------------|
| PROSER1        | NM_025138    | 84.18275656 | 0.307026319 | 1.92E-12    | 274.1874278 |
| MSH2           | NM_001258281 | 81.59073644 | 0.436683927 | 2.01E-10    | 186.8416292 |
| HADHA          | NM_000182    | 70.42728775 | 1.819138474 | 4.90E-07    | 38.71463813 |
| FSTL1          | NM_007085    | 50.16216501 | 0.613128214 | 2.65E-06    | 81.81349979 |
| TMEM221        | NM_001190844 | 49.89704227 | 2.837225484 | 6.36E-05    | 17.58656214 |
| TOPBP1         | NM_007027    | 67.03989941 | 0.782905585 | 6.74E-08    | 85.62960941 |
| TFAP2C         | NM_003222    | 146.5096539 | 3.065205608 | 6.21E-16    | 47.7976595  |
| EAF2           | NM_018456    | 97.67310262 | 0.036027444 | 4.18E-17    | 2711.075001 |
| CPOX           | NM_000097    | 118.9987163 | 10.66559075 | 8.75E-09    | 11.15725505 |
| C16orf58       | NM_022744    | 66.77477667 | 3.746395111 | 9.70E-06    | 17.82374114 |
| CRTC2          | NM_181715    | 117.4079799 | 3.368683476 | 1.21E-12    | 34.85277876 |
| XPO4           | NM_022459    | 86.50965393 | 0.708635539 | 7.11E-10    | 122.0791919 |
| PIK3CD         | NM_005026    | 61.85585918 | 3.527087156 | 7.41E-06    | 17.53737757 |
| C1QBP          | NM_001212    | 150.4272878 | 6.867887944 | 3.88E-14    | 21.90299099 |
| SPTLC2         | NM_004863    | 80.53024548 | 0.18722001  | 1.07E-10    | 430.1369571 |
| DHRS11         | NM_024308    | 72.22393965 | 4.128812353 | 8.04E-07    | 17.49266701 |
| OSTM1          | NM_014028    | 138.4684708 | 0.535719598 | 3.38E-18    | 258.471916  |
| SMG1P3         | NR_027155    | 170.162165  | 1.772819566 | 1.20E-18    | 95.98391638 |
| MED19          | NM_153450    | 68.10039037 | 6.108101273 | 1.56E-05    | 11.14919143 |
| USPL1          | NM_005800    | 82.38610466 | 1.794476023 | 1.75E-08    | 45.91095317 |
| CCDC174        | NM_016474    | 120.5302455 | 2.601307885 | 2.60E-12    | 46.33447896 |
| XRCC2          | NM_005431    | 123.3873883 | 1.37324439  | 2.77E-14    | 89.85100482 |
| PRDX2          | NM_005809    | 155.0810825 | 15.66420508 | 1.25E-10    | 9.900348068 |
| ABCA1          | NM_005502    | 35.08108251 | 0.179571406 | 0.000285154 | 195.3600698 |
| ADM            | NM_001124    | 203.3873883 | 25.08379395 | 5.63E-12    | 8.108318413 |
| TTPA           | NM_000370    | 83.65251108 | 0.381608155 | 5.38E-11    | 219.210491  |
| COTL1          | NM_021149    | 150.162165  | 3.00816104  | 1.51E-15    | 49.91826002 |
| TMEM43         | NM_024334    | 80.79536822 | 5.390702181 | 4.35E-07    | 14.98791169 |
| ZZEF1          | NM_015113    | 30.16216501 | 0.774274598 | 0.001193983 | 38.95538492 |
| LOC101929431   | NR_120660    | 107.5701449 | 2.384814053 | 5.16E-12    | 45.10630283 |
| NOMO3          | NM_001004067 | 138.9987163 | 1.304512424 | 3.48E-15    | 106.5522365 |
| TMEM42         | NM_144638    | 92.48906239 | 7.413480844 | 1.79E-07    | 12.47579434 |
| DENND3         | NM_014957    | 71.95881691 | 1.623807137 | 5.47E-07    | 44.31487906 |
| EEF1E1-BLOC1S5 | NR_037618    | 115.0810825 | 1.626523469 | 1.61E-11    | 70.75279556 |
| HOXA9          | NM_152739    | 113.2844306 | 21.31282589 | 6.68E-06    | 5.315317226 |
| SFXN1          | NM_022754    | 98.73359358 | 2.272376739 | 4.00E-10    | 43.44948259 |
| ZNF75A         | NM_153028    | 89.63191953 | 2.8995381   | 6.59E-09    | 30.91248207 |
| FAM76B         | NM_144664    | 109.3667968 | 0.694441947 | 2.19E-14    | 157.4887537 |
| MAF1           | NM_032272    | 127.5701449 | 14.87601329 | 9.93E-09    | 8.575560027 |
| PIK3AP1        | NM_152309    | 78.2033481  | 1.383262079 | 2.04E-07    | 56.53545287 |
| SFT2D1         | NM_145169    | 58.2033481  | 2.486072397 | 1.03E-05    | 23.41176716 |
| HDAC3          | NM_003883    | 166.7747767 | 1.978479374 | 1.08E-19    | 84.2944227  |
| HMGN4          | NM_006353    | 86.24453119 | 2.894466597 | 4.31E-09    | 29.79634703 |
| PCGF3          | NM_006315    | 115.3462052 | 2.471471502 | 1.94E-11    | 46.67106424 |
| DDX24          | NM_020414    | 131.9588169 | 2.797931247 | 4.31E-14    | 47.16299482 |
| IER3IP1        | NM_016097    | 83.91763382 | 3.278672969 | 1.25E-07    | 25.59499975 |
| SMYD2          | NM_020197    | 148.8365513 | 0.326556548 | 2.12E-21    | 455.7757374 |
| NPHP3          | NM_153240    | 92.22393965 | 1.557508289 | 1.30E-09    | 59.2124872  |
| KLF13          | NM_015995    | 80.26512274 | 3.306987978 | 9.87E-08    | 24.27136817 |
| FAM50A         | NM_004699    | 49.10167405 | 0.890488841 | 3.26E-06    | 55.14013405 |
| CALR           | NM_004343    | 183.3873883 | 6.466021081 | 7.55E-18    | 28.36170592 |
| CYP2U1         | NM_183075    | 98.46847084 | 0.14425586  | 3.17E-15    | 682.5959859 |
| PLD6           | NM_178836    | 75.08108251 | 0.734924676 | 7.18E-10    | 102.1616023 |
| MET            | NM_000245    | 55.08108251 | 3.519228864 | 5.85E-05    | 15.65146361 |
| ZNF396         | NM_145756    | 49.10167405 | 1.889453794 | 2.97E-05    | 25.98723198 |
| RPS3A          | NM_001267699 | 155.3462052 | 9.317005788 | 3.92E-13    | 16.67340439 |
| PRH1-PRR4      | NR_037918    | 135.0810825 | 0.373962306 | 2.99E-15    | 361.215771  |
| LOC389831      | NM_001242480 | 256.6718189 | 2.780201384 | 2.71E-27    | 92.32130464 |
| MOAP1          | NM_022151    | 146.5096539 | 9.084959189 | 4.13E-12    | 16.12661663 |
| GNPTG          | NM_032520    | 67.03989941 | 2.20305726  | 2.57E-07    | 30.43039355 |
| ZBTB7C         | NM_001039360 | 57.67310262 | 0.812053234 | 1.49E-06    | 71.02133231 |
| DUSP11         | NM_003584    | 149.3667968 | 2.116932365 | 8.21E-17    | 70.55813366 |
| SLC25A33       | NM_032315    | 160.5302455 | 2.455937742 | 3.98E-17    | 65.36413474 |
| SCAND2P        | NR_003654    | 81.06049096 | 7.786738629 | 8.32E-06    | 10.41006958 |

|               |              |             |             |             |             |
|---------------|--------------|-------------|-------------|-------------|-------------|
| FAM210B       | NM_080821    | 91.42857143 | 4.773965248 | 3.28E-08    | 19.15149497 |
| SPCS1         | NM_014041    | 109.1016741 | 13.67514916 | 1.24E-06    | 7.978097556 |
| PCSK7         | NM_004716    | 89.36679679 | 4.057938204 | 6.09E-08    | 22.02271013 |
| FOSB          | NM_001114171 | 86.50965393 | 11.59733493 | 8.11E-06    | 7.459442576 |
| LAPTM4A       | NM_014713    | 109.3667968 | 0.746912025 | 2.19E-14    | 146.4252726 |
| CYSRT1        | NM_199001    | 43.38738834 | 5.252202773 | 0.002938975 | 8.260798414 |
| TSEN54        | NM_207346    | 95.34620525 | 11.11874465 | 1.34E-06    | 8.575267103 |
| SLC35F6       | NM_017877    | 121.8558592 | 7.037813835 | 9.44E-11    | 17.31444764 |
| TTBK2         | NM_173500    | 93.54955335 | 0.521277895 | 7.36E-11    | 179.461961  |
| ZNF280C       | NM_017666    | 101.060491  | 0.268922834 | 6.47E-14    | 375.7973599 |
| AHR           | NM_001621    | 178.2033481 | 1.366517473 | 2.24E-20    | 130.4069298 |
| DKFZP434I0714 | NR_033797    | 93.01930787 | 8.510327783 | 2.29E-07    | 10.93016747 |
| LOC100379224  | NR_033341    | 29.89704227 | 1.199929067 | 0.00453202  | 24.91567468 |
| FBXO46        | NM_001080469 | 75.61132799 | 6.304774244 | 1.11E-05    | 11.99270982 |
| MORC3         | NM_015358    | 61.3256137  | 2.126504604 | 9.72E-06    | 28.83869312 |
| CA8           | NM_004056    | 109.6319195 | 0.031835096 | 1.20E-18    | 3443.743921 |
| CTSD          | NM_001909    | 35.08108251 | 2.67355307  | 0.002338344 | 13.12152091 |
| PYURF         | NM_032906    | 187.5701449 | 10.21949614 | 5.29E-16    | 18.35414802 |
| THOC3         | NM_032361    | 124.4478793 | 4.959098    | 1.55E-12    | 25.09486187 |
| FAM102A       | NM_001035254 | 107.5701449 | 4.928430608 | 1.02E-09    | 21.82645013 |
| OXSR1         | NM_005109    | 143.6525111 | 1.748987147 | 1.37E-14    | 82.13468652 |
| RBM33         | NM_053043    | 115.0810825 | 1.283592401 | 2.25E-11    | 89.65547195 |
| H3F3B         | NM_005324    | 219.7940845 | 29.51286665 | 7.92E-13    | 7.447398693 |
| APPL1         | NM_012096    | 115.8764507 | 0.621826022 | 3.28E-14    | 186.3486678 |
| SPIRE2        | NM_032451    | 78.2033481  | 3.405967786 | 1.74E-07    | 22.96068343 |
| TYMSOS        | NM_001012716 | 169.3667968 | 12.19126695 | 1.41E-13    | 13.89246888 |
| MEX3C         | NM_016626    | 37.67310262 | 3.659874372 | 0.001944616 | 10.29355076 |
| NUDT16L1      | NM_032349    | 73.01930787 | 14.49166404 | 0.000523636 | 5.03871106  |
| RPL11         | NM_000975    | 89.89704227 | 15.02759347 | 3.32E-05    | 5.982131634 |
| MAGEE1        | NM_020932    | 94.28571429 | 5.300212514 | 2.41E-08    | 17.78904412 |
| ARSJ          | NM_024590    | 68.83655131 | 0.092962527 | 1.84E-10    | 740.4763386 |
| POLA1         | NM_016937    | 54.28571429 | 0.562134703 | 4.57E-06    | 96.57065113 |
| GPR157        | NM_024980    | 145.7142857 | 2.449156977 | 2.47E-15    | 59.4956906  |
| FAM188B       | NM_032222    | 66.50965393 | 0.734764571 | 1.54E-07    | 90.51831915 |
| DECR1         | NM_001359    | 132.4890624 | 1.567591494 | 3.49E-14    | 84.5175946  |
| RNMTL1        | NM_018146    | 106.2445312 | 8.355113735 | 1.81E-08    | 12.71610831 |
| CCDC122       | NM_144974    | 92.22393965 | 1.04760186  | 5.20E-10    | 88.03338669 |
| TMTC3         | NM_181783    | 78.73359358 | 0.785716567 | 9.05E-10    | 100.2061008 |
| SPDL1         | NM_017785    | 46.50965393 | 0.144021208 | 1.95E-07    | 322.9361463 |
| USP45         | NM_001080481 | 197.9382254 | 0.866495959 | 1.20E-22    | 228.4352551 |
| TNFRSF10A     | NM_003844    | 115.8764507 | 2.329805588 | 1.75E-12    | 49.73653222 |
| SMKR1         | NM_001195243 | 83.91763382 | 2.780256873 | 1.62E-08    | 30.18341025 |
| VPS4A         | NM_013245    | 127.0398994 | 10.85963803 | 2.28E-09    | 11.69835487 |
| EHD4          | NM_139265    | 161.3256137 | 2.007579877 | 1.29E-16    | 80.358254   |
| B4GALT7       | NM_007255    | 181.5907364 | 11.69583255 | 6.37E-15    | 15.52610604 |
| LRRC58        | NM_001099678 | 210.162165  | 1.095053864 | 3.09E-28    | 191.9194771 |
| BFAR          | NM_016561    | 35.87645073 | 3.632683712 | 0.002198961 | 9.876018274 |
| SNX27         | NM_030918    | 103.9176338 | 0.584504761 | 1.46E-12    | 177.7874891 |
| APLF          | NM_173545    | 108.8365513 | 0.119778594 | 6.65E-16    | 908.6477624 |
| TXNDC17       | NM_032731    | 138.4684708 | 21.39363267 | 6.74E-08    | 6.472415087 |
| WIPF3         | NM_001080529 | 81.06049096 | 1.164121901 | 5.40E-09    | 69.63230476 |
| SARS          | NR_034072    | 134.3449216 | 12.25995739 | 4.48E-10    | 10.95802516 |
| DKK1          | NM_012242    | 244.1827566 | 23.98692743 | 2.75E-16    | 10.17982638 |
| ITFG2         | NM_018463    | 104.713002  | 2.969860676 | 3.81E-11    | 35.25855704 |
| C14orf142     | NM_032490    | 116.6718189 | 2.066193968 | 6.84E-14    | 56.46702136 |
| TUBB2A        | NM_001069    | 117.9382254 | 10.76427115 | 9.99E-09    | 10.95645248 |
| SAPCD2        | NM_178448    | 143.3873883 | 11.46064688 | 5.90E-11    | 12.51128229 |
| MAP3K14       | NM_003954    | 132.2239396 | 3.395728557 | 3.38E-13    | 38.93831248 |
| ROR2          | NM_004560    | 106.7747767 | 0.706995962 | 9.63E-12    | 151.0260064 |
| IFT57         | NM_018010    | 35.34620525 | 0.872185687 | 0.000454151 | 40.52600928 |
| LOC389247     | NR_033995    | 82.85714286 | 0.298083337 | 1.01E-12    | 277.9663692 |
| SIX5          | NM_175875    | 143.6525111 | 17.58101645 | 6.26E-09    | 8.170887701 |
| PAK1IP1       | NM_017906    | 103.3873883 | 1.113468603 | 3.00E-13    | 92.85164219 |
| TOE1          | NM_025077    | 147.0398994 | 19.98593132 | 1.38E-08    | 7.357170253 |

|              |              |             |             |             |             |
|--------------|--------------|-------------|-------------|-------------|-------------|
| ATP6V1B2     | NM_001693    | 107.3050222 | 2.625653391 | 1.05E-11    | 40.8679312  |
| LOC100288748 | NR_034034    | 174.875167  | 32.63157117 | 3.16E-08    | 5.359078978 |
| CCDC109B     | NM_017918    | 129.8970423 | 0.249522038 | 6.53E-17    | 520.5834448 |
| COX6A1       | NM_004373    | 110.4272878 | 4.159774137 | 4.81E-11    | 26.54646241 |
| ARHGAP18     | NM_033515    | 89.10167405 | 2.981350887 | 2.28E-08    | 29.88634261 |
| MYH7B        | NM_020884    | 109.8970423 | 3.160899128 | 6.95E-11    | 34.76765244 |
| C6orf57      | NM_145267    | 153.0193079 | 1.962944135 | 3.27E-17    | 77.95398001 |
| TRUB2        | NM_015679    | 97.93822536 | 1.547977257 | 5.45E-12    | 63.26851699 |
| ZBTB25       | NM_006977    | 93.54955335 | 3.188141076 | 3.40E-09    | 29.34297797 |
| TMEM261      | NM_033428    | 63.38738834 | 4.003139992 | 2.24E-05    | 15.8344171  |
| C11orf1      | NM_022761    | 61.3256137  | 7.496947185 | 0.000291136 | 8.180078129 |
| KLHL26       | NM_018316    | 60.53024548 | 1.043356378 | 2.60E-06    | 58.0149283  |
| C19orf24     | NM_017914    | 123.3873883 | 21.30237418 | 1.66E-06    | 5.792189513 |
| ATG2A        | NM_015104    | 130.6924105 | 0.377674898 | 2.62E-19    | 346.0447366 |
| FAHD2CP      | NR_003698    | 141.5907364 | 4.473780134 | 3.56E-14    | 31.64901542 |
| FMNL2        | NM_052905    | 121.5907364 | 1.432883555 | 8.76E-12    | 84.8573745  |
| C6orf147     | NR_027005    | 141.3256137 | 3.312466405 | 1.56E-13    | 42.66476891 |
| DYRK3        | NM_003582    | 137.6731026 | 0.493909129 | 1.42E-20    | 278.7417656 |
| ERGIC1       | NM_001031711 | 43.38738834 | 2.347002744 | 0.00070143  | 18.48629638 |
| LDLRAP1      | NM_015627    | 192.4890624 | 3.969032522 | 7.52E-20    | 48.49772869 |
| PPP5D1       | NM_001205281 | 26.24453119 | 0.874726115 | 0.004922171 | 30.00314125 |
| IFT52        | NM_016004    | 107.0398994 | 0.760094263 | 3.41E-13    | 140.8245065 |
| IDII         | NM_004508    | 67.03989941 | 5.692052681 | 3.15E-05    | 11.77780727 |
| ZXDB         | NM_007157    | 51.95881691 | 6.80019172  | 0.000693742 | 7.640787062 |
| IFNGR1       | NM_000416    | 110.9575332 | 0.60257226  | 5.52E-15    | 184.1397964 |
| KIF18A       | NM_031217    | 35.87645073 | 0.119009357 | 3.96E-05    | 301.4590744 |
| THAP2        | NM_031435    | 80.53024548 | 4.240111876 | 2.67E-07    | 18.99248129 |
| BSN-AS2      | NR_038866    | 33.01930787 | 1.384096657 | 0.000581095 | 23.85621532 |
| HDHD2        | NM_032124    | 163.9176338 | 1.345184058 | 9.10E-19    | 121.8551713 |
| FAM86DP      | NR_024241    | 132.2239396 | 3.129482539 | 3.18E-14    | 42.25105525 |
| NUCKS1       | NM_022731    | 40.53024548 | 2.697317337 | 0.001059083 | 15.02613168 |
| PSMA2        | NM_002787    | 61.06049096 | 0.665541235 | 1.83E-07    | 91.74561651 |
| GPR89B       | NM_016334    | 164.4478793 | 0.627220795 | 4.47E-20    | 262.1849922 |
| C11orf84     | NM_138471    | 49.10167405 | 2.920850975 | 7.27E-05    | 16.81074264 |
| SLBP         | NM_006527    | 101.060491  | 2.713401384 | 6.54E-10    | 37.24494708 |
| SBF1         | NM_002972    | 34.55083703 | 3.540915715 | 0.003979482 | 9.75599391  |
| ARL2-SNX15   | NR_037650    | 83.65251108 | 5.141153653 | 3.07E-07    | 16.27115561 |
| SMG7-AS1     | NR_040063    | 104.713002  | 3.289632798 | 3.81E-11    | 31.83121293 |
| GMPS         | NM_003875    | 125.9794085 | 1.085042222 | 1.30E-13    | 116.1055357 |
| PRR34-AS1    | NR_027034    | 49.36679679 | 6.650734174 | 0.001112282 | 7.422758977 |
| BMS1P20      | NR_027293    | 95.34620525 | 0.143237805 | 2.55E-14    | 665.6497253 |
| IRF1         | NM_002198    | 206.2445312 | 2.182024317 | 2.84E-26    | 94.51981338 |
| TMEM144      | NM_018342    | 75.34620525 | 1.599544589 | 1.59E-07    | 47.10478579 |
| NIPAL1       | NM_207330    | 187.8352676 | 1.348265855 | 1.76E-23    | 139.3161941 |
| REXO1        | NM_020695    | 46.50965393 | 2.548379593 | 0.000253051 | 18.25067744 |
| UCK2         | NM_012474    | 131.6936942 | 2.251303172 | 3.64E-13    | 58.49665021 |
| ST14         | NM_021978    | 112.2239396 | 1.546254461 | 8.40E-12    | 72.57792458 |
| TOX4         | NM_014828    | 41.06049096 | 2.890246601 | 0.00087604  | 14.2065701  |
| SPTY2D1      | NM_194285    | 95.34620525 | 2.147929633 | 4.87E-10    | 44.38981788 |
| MTCP1        | NM_001018025 | 60          | 2.147204422 | 3.64E-06    | 27.94331057 |
| WNT9A        | NM_003395    | 120.2651227 | 3.643029202 | 1.53E-11    | 33.01239603 |
| ZNF740       | NM_001004304 | 71.95881691 | 9.651082925 | 6.52E-05    | 7.456035501 |
| NEU3         | NM_006656    | 129.6319195 | 2.345374243 | 8.34E-14    | 55.27131541 |
| SQLE         | NM_003129    | 94.34492157 | 0.550124682 | 2.50E-12    | 171.4973435 |
| HNRNPA0      | NM_006805    | 166.5096539 | 15.29774522 | 6.18E-12    | 10.88458799 |
| PAPSS1       | NM_005443    | 109.1016741 | 1.708100209 | 9.81E-11    | 63.87311087 |
| TMSB4X       | NM_021109    | 83.91763382 | 8.76299568  | 7.06E-06    | 9.576363709 |
| ATP6AP1      | NM_001183    | 55.87645073 | 0.994970994 | 2.87E-07    | 56.15887404 |
| MED28        | NM_025205    | 115.3462052 | 1.590557065 | 5.22E-14    | 72.51937561 |
| RNF126       | NM_194460    | 94.81595977 | 2.244389845 | 1.04E-09    | 42.24576224 |
| DDX50        | NM_024045    | 155.611328  | 2.088637325 | 1.22E-16    | 74.50375712 |
| ARPP19       | NM_006628    | 126.7747767 | 2.10456415  | 1.95E-14    | 60.23801967 |
| RNF123       | NM_022064    | 134.550837  | 7.018518088 | 2.13E-11    | 19.17083284 |
| FLJ36777     | NR_027441    | 137.6731026 | 3.321635882 | 5.98E-15    | 41.4473794  |

|              |              |             |             |             |             |
|--------------|--------------|-------------|-------------|-------------|-------------|
| CBX6         | NM_014292    | 71.42857143 | 5.875488774 | 6.47E-06    | 12.1570433  |
| SPPL2A       | NM_032802    | 214.8159598 | 0.706939491 | 5.76E-27    | 303.8675339 |
| ATP6V0E1     | NM_003945    | 88.10039037 | 2.508017629 | 8.92E-09    | 35.12750044 |
| LRRK1        | NM_024652    | 43.1222656  | 0.069611318 | 5.54E-06    | 619.4720488 |
| ISY1-RAB43   | NM_001204890 | 46.77477667 | 1.509530869 | 0.000287331 | 30.9863002  |
| RNASEH2A     | NM_006397    | 93.01930787 | 6.264701951 | 6.77E-08    | 14.84816175 |
| THBS1        | NM_003246    | 123.9176338 | 2.629962595 | 4.13E-13    | 47.11764116 |
| ZNF572       | NM_152412    | 135.611328  | 7.799305887 | 7.32E-12    | 17.387615   |
| TRIP11       | NM_004239    | 60.26512274 | 1.051244842 | 6.02E-07    | 57.32738971 |
| MCOLN2       | NM_153259    | 121.060491  | 1.117723456 | 8.60E-13    | 108.3098778 |
| C19orf43     | NM_024038    | 149.6319195 | 7.49382746  | 3.05E-13    | 19.96735584 |
| PDAP1        | NM_014891    | 89.89704227 | 10.45004507 | 2.23E-06    | 8.602550672 |
| ST7-OT4      | NR_002329    | 61.59073644 | 1.483905194 | 3.16E-07    | 41.50584329 |
| TEFM         | NM_024683    | 113.8146761 | 6.163531121 | 2.98E-10    | 18.46582322 |
| VPS25        | NM_032353    | 122.3861047 | 5.172347162 | 5.75E-12    | 23.66161838 |
| THAP6        | NM_144721    | 122.1209819 | 2.691738979 | 3.73E-13    | 45.3688054  |
| FADD         | NM_003824    | 115.8764507 | 21.44048287 | 2.71E-06    | 5.40456348  |
| RPS8         | NM_001012    | 196.1415735 | 18.39931644 | 8.61E-14    | 10.66026415 |
| USP35        | NM_020798    | 58.2033481  | 0.550241855 | 7.98E-08    | 105.7777549 |
| ZNF720       | NM_001130913 | 145.9794085 | 0.02218827  | 1.12E-26    | 6579.125363 |
| VEZFI        | NM_007146    | 48.57142857 | 2.146239532 | 6.16E-05    | 22.63094489 |
| KLC3         | NM_177417    | 104.4478793 | 11.89808329 | 1.70E-07    | 8.778546661 |
| WDR61        | NM_025234    | 111.9588169 | 4.290190579 | 6.22E-11    | 26.09646701 |
| KIAA1279     | NM_015634    | 102.3861047 | 0.093017449 | 1.26E-17    | 1100.719334 |
| IK           | NM_006083    | 55.34620525 | 0.179355701 | 9.07E-08    | 308.5834729 |
| CPNE2        | NM_152727    | 43.1222656  | 1.301252785 | 0.000467315 | 33.13903807 |
| BOP1         | NM_015201    | 154.8159598 | 3.687074675 | 2.52E-15    | 41.98883218 |
| SETD2        | NM_014159    | 94.81595977 | 0.336048027 | 1.64E-11    | 282.1500265 |
| TEN1         | NM_001113324 | 70.69241049 | 4.082984035 | 3.01E-06    | 17.31390813 |
| APOBEC3C     | NM_014508    | 81.85585918 | 5.592777903 | 3.58E-07    | 14.63599317 |
| NRBP1        | NM_013392    | 155.0810825 | 8.341111984 | 2.00E-13    | 18.59237507 |
| GET4         | NM_015949    | 118.2033481 | 3.492534508 | 1.26E-11    | 33.84457558 |
| GTPBP4       | NM_012341    | 89.89704227 | 1.207052496 | 5.92E-10    | 74.47649754 |
| SLC45A1      | NM_001080397 | 83.91763382 | 1.997030424 | 8.29E-09    | 42.02120949 |
| MAP6D1       | NM_024871    | 92.22393965 | 5.366329396 | 4.45E-08    | 17.18566507 |
| LOC101926913 | NR_110185    | 54.81595977 | 0.842220341 | 2.19E-06    | 65.08505801 |
| CDK17        | NM_002595    | 92.48906239 | 1.115941149 | 3.00E-10    | 82.87987451 |
| MKX-AS1      | NR_121652    | 35.34620525 | 0.159127862 | 2.87E-05    | 222.1245535 |
| IPO13        | NM_014652    | 107.0398994 | 2.304889058 | 9.70E-12    | 46.44036947 |
| TUBG2        | NM_016437    | 162.3861047 | 12.13957525 | 1.81E-12    | 13.37658866 |
| YY1          | NM_003403    | 85.97940845 | 4.254695713 | 1.97E-07    | 20.20812163 |
| SLC16A9      | NM_194298    | 92.48906239 | 0.351283519 | 2.31E-12    | 263.2889312 |
| LRRC40       | NM_017768    | 77.67310262 | 0.511145338 | 8.48E-10    | 151.9589378 |
| MDGA1        | NM_153487    | 63.38738834 | 1.998647054 | 5.17E-06    | 31.71514861 |
| CRISPLD2     | NM_031476    | 173.8146761 | 1.20720175  | 8.60E-19    | 143.9814647 |
| CHST3        | NM_004273    | 50.42728775 | 2.857933532 | 8.22E-05    | 17.6446678  |
| NTSR1        | NM_002531    | 109.3667968 | 14.34996583 | 3.86E-07    | 7.621397718 |
| KCNQ1OT1     | NR_002728    | 117.9382254 | 1.650798808 | 8.53E-12    | 71.44312488 |
| HIST2H2BC    | NR_036461    | 97.67310262 | 15.2255476  | 0.002547409 | 6.415079783 |
| NAGLU        | NM_000263    | 89.89704227 | 10.62690425 | 4.79E-06    | 8.459381973 |
| GBA2         | NM_020944    | 121.8558592 | 8.451307113 | 4.16E-10    | 14.41858136 |
| KDM5A        | NM_001042603 | 76.14157347 | 1.516738483 | 1.94E-07    | 50.20085818 |
| TSTA3        | NM_003313    | 173.2844306 | 9.530269886 | 2.19E-15    | 18.18253131 |
| PHF13        | NM_153812    | 71.95881691 | 6.843868968 | 1.18E-05    | 10.51434755 |
| TRIM6-TRIM34 | NM_001003819 | 27.03989941 | 0.743216629 | 0.00372169  | 36.38225836 |
| RRP7B        | NR_002184    | 132.7541851 | 6.372828801 | 5.89E-12    | 20.83128062 |
| CEP250       | NM_007186    | 87.30502215 | 0.436830428 | 1.13E-11    | 199.8602127 |
| PHKA2        | NM_000292    | 80.53024548 | 0.396189698 | 5.22E-10    | 203.2618364 |
| RPL18A       | NM_000980    | 130.4272878 | 13.18333903 | 4.01E-09    | 9.893342459 |
| LOC101927211 | NR_110742    | 37.67310262 | 0.884117741 | 0.00020276  | 42.61095651 |
| RECK         | NM_021111    | 150.162165  | 0.853628046 | 9.30E-17    | 175.9105336 |
| PRRX2        | NM_016307    | 49.10167405 | 2.600928489 | 0.000164031 | 18.87851752 |
| CXCL2        | NM_002089    | 106.5096539 | 6.664257405 | 1.69E-08    | 15.98222389 |
| CEP83-AS1    | NR_027035    | 121.5907364 | 4.997714779 | 8.17E-12    | 24.32926684 |

|              |              |             |             |             |             |
|--------------|--------------|-------------|-------------|-------------|-------------|
| FUBP3        | NM_003934    | 100.7953682 | 1.971573006 | 4.12E-10    | 51.12433977 |
| ZMPSTE24     | NM_005857    | 117.9382254 | 1.488924412 | 4.80E-13    | 79.21035107 |
| ATAD5        | NM_024857    | 74.55083703 | 1.432412943 | 2.14E-07    | 52.0456321  |
| L3MBTL2      | NM_031488    | 47.57014489 | 2.64874623  | 0.000110779 | 17.95949508 |
| LINC00662    | NR_027301    | 107.3050222 | 11.6000667  | 2.84E-07    | 9.250379758 |
| SP140L       | NM_138402    | 44.18275656 | 0.052412642 | 1.04E-06    | 842.9789977 |
| LATS2        | NM_014572    | 98.73359358 | 2.581922204 | 1.03E-09    | 38.24034412 |
| B3GNT2       | NM_006577    | 172.4890624 | 3.060404058 | 9.82E-18    | 56.36153237 |
| PHLPP1       | NM_194449    | 46.24453119 | 0.682000784 | 3.91E-05    | 67.80715259 |
| CWC15        | NM_016403    | 75.61132799 | 0.648222155 | 3.76E-10    | 116.6441589 |
| VAMP3        | NM_004781    | 35.08108251 | 1.013983273 | 0.00089422  | 34.59729903 |
| PARP1        | NM_001618    | 158.2033481 | 1.654761389 | 2.29E-17    | 95.60493083 |
| SFXN2        | NM_178858    | 96.40669621 | 2.004200617 | 1.26E-10    | 48.10231838 |
| DYNC1L1      | NM_016141    | 122.8571429 | 1.071638155 | 6.05E-14    | 114.6442409 |
| WFDC21P      | NR_030732    | 31.95881691 | 1.98762396  | 0.001919256 | 16.07890504 |
| DARS-AS1     | NR_110200    | 130.9575332 | 2.718159628 | 9.70E-14    | 48.17875003 |
| ATP8B1       | NM_005603    | 41.06049096 | 1.185188213 | 0.000160663 | 34.64470073 |
| DOT1L        | NM_032482    | 54.55083703 | 3.076307204 | 4.92E-05    | 17.73257136 |
| PUS3         | NM_031307    | 84.4478793  | 5.345926162 | 1.93E-07    | 15.79667895 |
| LOC100130691 | NR_026966    | 84.18275656 | 0.923631439 | 1.88E-09    | 91.14323418 |
| WWC2         | NM_024949    | 72.22393965 | 1.057468298 | 7.65E-08    | 68.29891712 |
| LSM7         | NM_016199    | 92.48906239 | 5.696469767 | 2.27E-08    | 16.23620702 |
| DENND6A      | NM_152678    | 173.2844306 | 0.210459382 | 2.39E-26    | 823.3628203 |
| LOC101926895 | NR_120372    | 83.91763382 | 2.558642445 | 6.68E-08    | 32.79771818 |
| SEMA3C       | NM_006379    | 49.36679679 | 0.407454195 | 1.21E-05    | 121.1591324 |
| LGALS3BP     | NM_005567    | 153.8146761 | 6.237668146 | 8.62E-15    | 24.65900277 |
| AAK1         | NM_014911    | 120.7953682 | 0.53538129  | 7.98E-14    | 225.6249339 |
| AKIRIN2      | NM_018064    | 109.3667968 | 3.857653432 | 3.70E-10    | 28.35060192 |
| ILKAP        | NM_030768    | 106.2445312 | 3.062480461 | 7.22E-11    | 34.69231316 |
| LINC00482    | NR_038080    | 71.2226597  | 9.386937355 | 3.78E-05    | 7.587422103 |
| KLHL18       | NM_025010    | 89.10167405 | 0.153283806 | 3.37E-13    | 581.2856328 |
| SLC25A43     | NM_145305    | 97.40797988 | 1.133387211 | 2.39E-10    | 85.94413182 |
| TXNL4A       | NM_006701    | 137.6731026 | 3.218032951 | 1.18E-14    | 42.78175666 |
| BHLHE40      | NM_003670    | 46.50965393 | 3.457959777 | 0.000360501 | 13.45002745 |
| RPS12        | NM_001016    | 209.1016741 | 18.64480652 | 1.08E-14    | 11.21500906 |
| C19orf10     | NM_019107    | 55.61132799 | 2.586056824 | 1.13E-05    | 21.50429467 |
| FEM1B        | NM_015322    | 157.4079799 | 5.749648255 | 9.70E-15    | 27.37697558 |
| EAPP         | NM_018453    | 109.8970423 | 0.275085752 | 4.38E-16    | 399.5010338 |
| GFER         | NM_005262    | 123.1222656 | 9.031670096 | 7.71E-10    | 13.6322811  |
| DLAT         | NM_001931    | 123.1222656 | 2.887765832 | 1.04E-12    | 42.63582048 |
| FAM127A      | NM_001078171 | 105.7142857 | 5.70188093  | 2.66E-08    | 18.54024786 |
| ORAI3        | NM_152288    | 137.9382254 | 22.7124699  | 9.09E-08    | 6.073237563 |
| RAD51-AS1    | NR_040058    | 103.9176338 | 23.31874985 | 0.000311579 | 4.456398155 |
| ANXA4        | NM_001153    | 151.9588169 | 2.7258455   | 3.85E-15    | 55.74740641 |
| TGS1         | NM_024831    | 201.5907364 | 2.608491005 | 1.08E-21    | 77.28251163 |
| KIAA1377     | NM_020802    | 59.26383906 | 0.35522427  | 1.60E-07    | 166.8349942 |
| DCPS         | NM_014026    | 172.4890624 | 3.625427452 | 1.02E-16    | 47.57757938 |
| ACAA2        | NM_006111    | 109.3667968 | 0.076531984 | 3.56E-19    | 1429.033862 |
| JPX          | NR_024582    | 52.22393965 | 0.505511877 | 5.13E-06    | 103.309026  |
| NKX2-8       | NM_014360    | 101.060491  | 6.821448169 | 4.15E-08    | 14.81510794 |
| FNBP4        | NM_015308    | 89.10167405 | 2.580482188 | 9.16E-09    | 34.52907928 |
| INO80D       | NM_017759    | 55.61132799 | 0.717909026 | 2.44E-06    | 77.46291791 |
| PGAM1        | NM_002629    | 92.48906239 | 8.756480918 | 3.22E-07    | 10.56235527 |
| TRMT61A      | NM_152307    | 72.48906239 | 5.605712753 | 6.00E-06    | 12.93128378 |
| NT5M         | NM_020201    | 125.9794085 | 0.793749845 | 6.12E-15    | 158.7142464 |
| OARD1        | NM_145063    | 109.3667968 | 10.52878741 | 6.84E-08    | 10.38740669 |
| ANKRD52      | NM_173595    | 115.611328  | 2.103008796 | 5.08E-13    | 54.97424843 |
| ETHE1        | NM_014297    | 183.9176338 | 4.521923168 | 5.54E-18    | 40.6724367  |
| CCDC25       | NM_018246    | 121.5907364 | 1.206734145 | 5.54E-14    | 100.760169  |
| LOC284080    | NR_038230    | 162.3861047 | 23.8452041  | 1.02E-09    | 6.810011103 |
| TRIM59       | NM_173084    | 175.8764507 | 4.488137817 | 3.55E-18    | 39.18695412 |
| PLK3         | NM_004073    | 204.4478793 | 16.51313869 | 2.87E-15    | 12.38092183 |
| CBR4         | NM_032783    | 127.5701449 | 2.339507662 | 1.55E-14    | 54.5286288  |
| ZNF215       | NM_013250    | 89.63191953 | 0.839325524 | 2.33E-10    | 106.7904133 |

|              |              |             |             |             |             |
|--------------|--------------|-------------|-------------|-------------|-------------|
| EIF3E        | NM_001568    | 88.36551311 | 3.393175874 | 1.14E-08    | 26.04212584 |
| HS3ST3B1     | NM_006041    | 91.95881691 | 0.66752231  | 8.41E-12    | 137.7614134 |
| SLC35E3      | NM_018656    | 166.7747767 | 1.254016256 | 1.45E-21    | 132.9925158 |
| CDKN2AIP     | NM_017632    | 55.08108251 | 0.996166263 | 7.53E-07    | 55.29306156 |
| MTCH2        | NM_014342    | 103.9176338 | 3.377948606 | 1.03E-09    | 30.76353312 |
| PAFAH2       | NM_000437    | 32.75418513 | 0.862705284 | 0.000759886 | 37.9668303  |
| SNTB2        | NM_006750    | 126.5096539 | 0.428060387 | 1.64E-15    | 295.5416052 |
| ANKDD1A      | NM_182703    | 155.8764507 | 1.859500927 | 3.78E-17    | 83.82703576 |
| GLB1L2       | NM_138342    | 54.28571429 | 1.01960147  | 1.75E-05    | 53.24209105 |
| CNTNAP3B     | NM_001201380 | 46.24453119 | 0.662889831 | 3.74E-05    | 69.76201628 |
| TMEM238      | NM_001190764 | 80.26512274 | 9.216131926 | 1.15E-05    | 8.709198543 |
| PARM1        | NM_015393    | 147.0398994 | 0.707726802 | 3.24E-17    | 207.7636441 |
| ELOF1        | NM_032377    | 116.6718189 | 2.491276607 | 1.81E-13    | 46.83214165 |
| MFSD6        | NM_017694    | 74.28571429 | 0.971254806 | 1.60E-08    | 76.48426947 |
| CCDC28A      | NM_015439    | 33.54955335 | 1.780781331 | 0.002619399 | 18.83979396 |
| DNAJB2       | NM_001039550 | 106.2445312 | 8.112192726 | 8.04E-09    | 13.09689436 |
| UXT-AS1      | NR_028119    | 51.95881691 | 3.541886293 | 0.000688262 | 14.66981507 |
| SMC5         | NM_015110    | 186.5096539 | 0.617056964 | 3.17E-23    | 302.2567847 |
| S100A11      | NM_005620    | 120.2651227 | 11.24794929 | 9.50E-09    | 10.69218216 |
| PXDC1        | NM_183373    | 89.63191953 | 1.780078398 | 1.72E-09    | 50.35279325 |
| STRN         | NM_003162    | 149.1016741 | 0.245313559 | 8.82E-20    | 607.8003795 |
| VCPIP1       | NM_025054    | 87.57014489 | 1.483378156 | 1.88E-09    | 59.03426886 |
| C1orf74      | NM_152485    | 177.9382254 | 3.566691768 | 3.67E-18    | 49.88887096 |
| FAM208B      | NM_017782    | 74.55083703 | 1.62789736  | 3.13E-07    | 45.7957847  |
| FZD4         | NM_012193    | 189.1016741 | 2.213390237 | 2.94E-23    | 85.43530685 |
| FRMPD1       | NM_014907    | 31.95881691 | 0.464600141 | 0.000885111 | 68.78778999 |
| STAMBPL1     | NM_020799    | 107.5701449 | 1.776503197 | 1.71E-11    | 60.55161909 |
| DPY19L1      | NM_015283    | 188.5714286 | 0.391305073 | 1.20E-24    | 481.9038683 |
| PSMB7        | NM_002799    | 75.08108251 | 1.724908855 | 2.59E-07    | 43.52756511 |
| KCNG1        | NM_002237    | 221.060491  | 4.649020811 | 1.44E-22    | 47.54990351 |
| EIF3M        | NM_006360    | 113.0193079 | 2.888517438 | 1.23E-11    | 39.12709904 |
| GPBP1L1      | NM_021639    | 85.24324752 | 1.552104577 | 1.15E-08    | 54.92107219 |
| TRIM8        | NM_030912    | 94.07979883 | 11.51313588 | 2.73E-06    | 8.171518152 |
| LINC00574    | NR_026780    | 33.01930787 | 1.738668634 | 0.001919395 | 18.99114484 |
| DYM          | NM_017653    | 115.3462052 | 0.21691044  | 2.94E-13    | 531.7688047 |
| SRGAP1       | NM_020762    | 29.89704227 | 0.695152084 | 0.002670838 | 43.00791574 |
| EIF2S3       | NM_001415    | 54.55083703 | 3.075077627 | 2.77E-05    | 17.73966177 |
| C7orf13      | NR_026865    | 52.22393965 | 4.548010612 | 0.000369506 | 11.48280954 |
| C1RL-AS1     | NR_026947    | 135.0810825 | 6.829651611 | 1.66E-11    | 19.77861979 |
| DNAJC4       | NM_005528    | 93.01930787 | 22.70002628 | 0.000254953 | 4.097762122 |
| ENPP4        | NM_014936    | 111.9588169 | 0.910878717 | 1.11E-14    | 122.9129794 |
| LOC100506100 | NR_046240    | 101.060491  | 6.651754976 | 3.11E-08    | 15.19305677 |
| NPC2         | NM_006432    | 69.63191953 | 1.60209892  | 7.07E-08    | 43.46293396 |
| BAZ1B        | NM_032408    | 120         | 2.401826545 | 6.58E-12    | 49.96197591 |
| WDR83OS      | NM_016145    | 189.8970423 | 22.74634616 | 7.69E-11    | 8.348463571 |
| ERP44        | NM_015051    | 95.87645073 | 0.028964783 | 1.32E-16    | 3310.104207 |
| KAZALD1      | NM_030929    | 236.9369417 | 34.90724562 | 4.72E-13    | 6.787614934 |
| APMAP        | NM_020531    | 220.2651227 | 1.576250756 | 3.03E-27    | 139.7398998 |
| NUFIP2       | NM_020772    | 194.8159598 | 4.165898068 | 3.34E-19    | 46.76445669 |
| RHPN2        | NM_033103    | 60          | 0.470978706 | 2.72E-07    | 127.3942946 |
| ZNF321P      | NR_037805    | 79.26383906 | 1.318755476 | 1.56E-09    | 60.10503124 |
| EHHADH-AS1   | NR_038990    | 23.38738834 | 0.300907761 | 0.004008311 | 77.72278197 |
| SOX9         | NM_000346    | 144.9781248 | 8.693987793 | 1.43E-12    | 16.67567614 |
| ZSCAN16      | NM_025231    | 76.67181894 | 7.34960287  | 4.88E-06    | 10.43210365 |
| SPEN         | NM_015001    | 57.40797988 | 1.732301624 | 2.28E-05    | 33.13971372 |
| DBF4         | NM_006716    | 92.22393965 | 1.679570862 | 8.73E-10    | 54.90922814 |
| RALB         | NM_002881    | 70.16216501 | 0.981150146 | 1.34E-07    | 71.51012034 |
| HOTTIP       | NR_037843    | 72.48906239 | 2.852625839 | 1.85E-07    | 25.41134607 |
| SNHG11       | NR_003239    | 137.9382254 | 10.24965226 | 5.38E-11    | 13.45784442 |
| RABL3        | NM_173825    | 58.73359358 | 0.679617531 | 2.41E-07    | 86.42153995 |
| DDB1         | NM_001923    | 86.50965393 | 2.477244057 | 9.74E-09    | 34.92173236 |
| ZW10         | NM_004724    | 75.87645073 | 0.592073175 | 4.15E-10    | 128.1538397 |
| PNPLA5       | NM_138814    | 60.58945276 | 0.273378952 | 9.45E-09    | 221.6317402 |
| HIP1R        | NM_003959    | 42.85714286 | 4.692558834 | 0.002651507 | 9.133000645 |

|               |              |             |             |             |             |
|---------------|--------------|-------------|-------------|-------------|-------------|
| CHAC2         | NM_001008708 | 123.6525111 | 4.265176076 | 8.13E-13    | 28.99118556 |
| LINC01267     | NR_110135    | 37.93822536 | 2.622693158 | 0.001858747 | 14.4653694  |
| UBXN4         | NM_014607    | 67.30502215 | 1.461042333 | 5.99E-07    | 46.06644218 |
| EPRS          | NM_004446    | 72.48906239 | 1.214140453 | 4.68E-07    | 59.70401714 |
| PNRC2         | NM_017761    | 128.8365513 | 9.16077457  | 1.76E-10    | 14.06393644 |
| NHEJ1         | NM_024782    | 201.060491  | 0.989427787 | 1.44E-22    | 203.2088584 |
| C1orf228      | NM_001145636 | 61.3256137  | 3.180011735 | 1.16E-05    | 19.28471302 |
| MED31         | NM_016060    | 67.03989941 | 5.494699842 | 2.65E-05    | 12.20083014 |
| TAF8          | NM_138572    | 169.6319195 | 1.41839777  | 2.45E-20    | 119.5940399 |
| ATXN7L2       | NM_153340    | 89.89704227 | 1.694862357 | 3.42E-10    | 53.04091032 |
| NAA50         | NM_025146    | 152.2239396 | 2.27971165  | 5.82E-17    | 66.77333058 |
| MYO10         | NM_012334    | 177.6731026 | 0.667822135 | 1.30E-19    | 266.048538  |
| GPR125        | NM_145290    | 60          | 0.771956669 | 7.68E-07    | 77.72456977 |
| SPC24         | NM_182513    | 93.28443061 | 5.192396607 | 1.33E-08    | 17.96558269 |
| HINT2         | NM_032593    | 136.6718189 | 17.75405928 | 3.87E-08    | 7.698060303 |
| PCNX          | NM_014982    | 62.85714286 | 0.550895866 | 4.09E-07    | 114.099863  |
| SCAI          | NM_173690    | 57.14285714 | 0.145551175 | 3.59E-07    | 392.596329  |
| MAL2          | NM_052886    | 51.69369417 | 1.899041839 | 5.55E-05    | 27.22093485 |
| ARPC4-TTLL3   | NM_001198793 | 113.0193079 | 5.902820543 | 3.72E-10    | 19.14666167 |
| ZBTB11        | NM_014415    | 132.7541851 | 4.852111868 | 1.91E-12    | 27.36008335 |
| EIF3F         | NM_003754    | 50.42728775 | 1.680552953 | 6.70E-06    | 30.00636645 |
| LRRC47        | NM_020710    | 88.57142857 | 2.968285553 | 1.22E-08    | 29.83925467 |
| RAB38         | NM_022337    | 103.3873883 | 0.567662192 | 3.87E-13    | 182.1283675 |
| RAC2          | NM_002872    | 114.550837  | 6.562664571 | 8.65E-10    | 17.45492792 |
| DNAJC25-GNG10 | NM_004125    | 241.3256137 | 4.219814667 | 2.23E-24    | 57.18867598 |
| GBAP1         | NR_002188    | 116.4066962 | 5.571089016 | 1.30E-10    | 20.89478303 |
| SEC61B        | NM_006808    | 38.46847084 | 2.20418573  | 0.000726981 | 17.45246343 |
| PISD          | NM_014338    | 129.1016741 | 9.7336701   | 7.39E-10    | 13.26341172 |
| TUBBP5        | NR_027156    | 32.75418513 | 0.06305143  | 3.57E-05    | 519.4836215 |
| DNAJC3        | NM_006260    | 175.0810825 | 0.606452285 | 3.64E-21    | 288.6972097 |
| CNOT6         | NM_015455    | 44.97812478 | 0.98979075  | 2.82E-05    | 45.44205406 |
| TMEM180       | NM_024789    | 164.9781248 | 8.0602812   | 1.64E-14    | 20.46803588 |
| FLJ27354      | NR_033981    | 73.54955335 | 3.913482403 | 2.41E-07    | 18.79388886 |
| PCNXL4        | NM_022495    | 173.2844306 | 1.190164229 | 1.29E-20    | 145.5970751 |
| FBXO42        | NM_018994    | 102.6512274 | 1.278960143 | 2.48E-10    | 80.26147491 |
| EGLN3         | NM_022073    | 183.6525111 | 2.502229261 | 7.98E-20    | 73.39555729 |
| WASL          | NM_003941    | 180.2651227 | 0.991458638 | 1.20E-20    | 181.8180969 |
| TTLL5         | NM_015072    | 129.1016741 | 0.062217231 | 2.68E-18    | 2075.014779 |
| TPPP          | NM_007030    | 48.83655131 | 2.598770414 | 0.000128161 | 18.79217612 |
| GEMIN6        | NM_024775    | 66.77477667 | 3.419748283 | 2.05E-06    | 19.52622566 |
| LOC401052     | NM_001008737 | 107.3050222 | 12.42448975 | 2.32E-07    | 8.636573762 |
| UVSSA         | NM_020894    | 95.87645073 | 1.322911296 | 1.57E-10    | 72.47383176 |
| TMEM183A      | NM_138391    | 95.34620525 | 2.358321647 | 1.45E-09    | 40.42968667 |
| LPCAT3        | NM_005768    | 163.3873883 | 3.584442232 | 7.92E-16    | 45.58237454 |
| USP12         | NM_182488    | 65.97940845 | 1.099595239 | 1.98E-07    | 60.00335952 |
| LOC100128568  | NR_046376    | 95.34620525 | 2.669488564 | 1.69E-09    | 35.7170308  |
| DNAH17-AS1    | NR_102401    | 115.611328  | 4.528032185 | 4.49E-11    | 25.53235561 |
| LRP4          | NM_002334    | 61.06049096 | 0.680712049 | 2.82E-07    | 89.70091111 |
| COG3          | NM_031431    | 120.5302455 | 0.760493839 | 1.08E-14    | 158.4894437 |
| PDZD11        | NM_016484    | 77.40797988 | 2.609516368 | 2.13E-08    | 29.66372651 |
| ITPKB         | NM_002221    | 41.06049096 | 1.0101273   | 0.00013775  | 40.6488281  |
| C17orf67      | NM_001085430 | 118.2033481 | 1.537080437 | 9.39E-13    | 76.9012117  |
| CCNG2         | NM_004354    | 75.87645073 | 4.344359032 | 3.76E-07    | 17.46551106 |
| LOC646762     | NR_024278    | 109.6319195 | 0.862381176 | 1.16E-12    | 127.1269859 |
| COMMD1        | NM_152516    | 94.81595977 | 0.011794427 | 4.34E-16    | 8039.047354 |
| PAM16         | NM_016069    | 78.73359358 | 4.815130742 | 9.25E-07    | 16.35128884 |
| ANO8          | NM_020959    | 57.67310262 | 11.84127886 | 0.004153982 | 4.870513001 |
| CRADD         | NM_003805    | 80.53024548 | 0.776151666 | 5.68E-09    | 103.7558109 |
| SYNJ2BP       | NM_018373    | 83.38738834 | 1.273217688 | 1.32E-08    | 65.49342591 |
| LARP1         | NM_015315    | 75.34620525 | 2.805216227 | 5.44E-07    | 26.85932175 |
| ENDOD1        | NM_015036    | 142.6512274 | 1.813768969 | 1.28E-15    | 78.64906162 |
| MSANTD4       | NM_032424    | 115.3462052 | 3.035892857 | 5.82E-12    | 37.99416207 |



**Sheet2: Pausing genes in HMBA treated HCT116 cells expressing shGFP**

| Symbol      | Gene ID      | Promoter RPK | Gene Body RPK | pValue      | Pause Ratio(TR) |
|-------------|--------------|--------------|---------------|-------------|-----------------|
| ATP5G3      | NM_001689    | 67.58707355  | 0.389407526   | 9.44E-09    | 173.5638603     |
| CPSF3L      | NM_001256460 | 39.05669588  | 2.813043277   | 0.001283916 | 13.88414327     |
| NPM1        | NM_002520    | 31.51110656  | 0.448189952   | 0.000606125 | 70.30748101     |
| CD320       | NM_016579    | 69.07743799  | 1.074244077   | 1.18E-07    | 64.30329893     |
| PLSCR3      | NM_020360    | 55.4766238   | 3.689446985   | 0.000327741 | 15.0365689      |
| MMP24-AS1   | NR_102706    | 72.94399974  | 4.144419932   | 7.30E-06    | 17.60053299     |
| SERTAD1     | NM_013376    | 64.8617269   | 3.011151416   | 5.22E-06    | 21.54050658     |
| ANAPC11     | NM_016476    | 38.8691617   | 0.127865724   | 1.83E-05    | 303.9842156     |
| NUDT1       | NM_198949    | 58.90026912  | 1.255368213   | 1.10E-06    | 46.91871954     |
| ZNF324      | NM_014347    | 36.77426566  | 1.514903443   | 0.000702013 | 24.27498982     |
| CIRBP       | NR_023313    | 89.36392766  | 20.71070229   | 0.000880877 | 4.314867088     |
| SLC35A2     | NM_001282647 | 34.2364532   | 1.206247767   | 0.001758366 | 28.38260441     |
| TMC4        | NM_001145303 | 34.49183545  | 1.238634892   | 0.002762003 | 27.84665254     |
| PSMC3IP     | NM_001256016 | 43.17863987  | 0.395498708   | 1.41E-05    | 109.1751729     |
| UBA52       | NM_001033930 | 85.49736591  | 5.124971914   | 2.31E-07    | 16.68250428     |
| TK1         | NM_003258    | 43.6215563   | 1.591853233   | 0.000369804 | 27.40300135     |
| DDTL        | NM_001084393 | 67.58707355  | 11.17866471   | 0.000589174 | 6.04607753      |
| TM7SF2      | NR_102367    | 120.9688013  | 11.99748831   | 6.73E-08    | 10.08284386     |
| SLX1A       | NM_001015000 | 170.176747   | 22.01985185   | 2.52E-09    | 7.728332969     |
| LRRC75A-AS1 | NR_027162    | 68.37913931  | 14.67085255   | 0.002360905 | 4.660883824     |
| HNRNPA1P10  | NR_002944    | 74.78351352  | 4.755894078   | 7.58E-06    | 15.72438585     |
| HCP5        | NR_040662    | 45.20568784  | 1.001499013   | 0.000137069 | 45.13802535     |
| CYB561A3    | NM_001161454 | 33.35062034  | 1.272134347   | 0.002900842 | 26.21627221     |
| NR4A1       | NM_002135    | 88.5718619   | 1.912468941   | 2.89E-09    | 46.31283678     |
| HES6        | NM_018645    | 93.13672232  | 13.6690243    | 5.74E-05    | 6.813706689     |
| HARS        | NM_001289093 | 42.82949054  | 0.29178903    | 6.10E-06    | 146.7823878     |
| NUDT22      | NM_001128613 | 64.8617269   | 4.927435546   | 6.01E-05    | 13.16338414     |
| ABHD11      | NM_148912    | 57.31613758  | 5.294208554   | 0.000328143 | 10.82619564     |
| C21orf33    | NM_198155    | 34.93475188  | 1.943895633   | 0.003603263 | 17.97151621     |
| PPIA        | NM_021130    | 61.18269933  | 4.609075725   | 0.000159813 | 13.27439664     |
| LINC01024   | NR_102741    | 73.38691617  | 0.286758932   | 4.89E-10    | 255.9185013     |
| DNAJC19     | NR_046073    | 46.25313586  | 1.273630772   | 3.82E-05    | 36.31596916     |
| RASSF1      | NM_007182    | 42.57410829  | 4.11171402    | 0.003128863 | 10.35434568     |
| BAIAP3      | NM_001199099 | 62.13638026  | 2.20591305    | 4.44E-06    | 28.1681004      |
| C8orf58     | NM_001013842 | 37.66009852  | 0.380880373   | 0.000104768 | 98.87644846     |
| AURKAIP1    | NM_001127229 | 49.58301409  | 2.012531269   | 0.0002026   | 24.63713973     |
| RPL13A      | NM_012423    | 83.91323438  | 17.37115735   | 0.000782131 | 4.830607006     |
| FOS         | NM_005252    | 125.6952769  | 15.60745124   | 1.90E-07    | 8.05354282      |
| RPS10       | NM_001203245 | 38.17086302  | 0.373969134   | 0.000169112 | 102.0695549     |
| MSTO1       | NM_001256533 | 29.04114216  | 0.229200646   | 0.001164973 | 126.7061971     |
| SRA1        | NR_045587    | 77.85800951  | 1.420728991   | 2.95E-08    | 54.80145051     |
| SPDYC       | NM_001008778 | 46.69605229  | 1.057217083   | 5.44E-05    | 44.16884008     |
| ZNF276      | NR_110129    | 57.66528692  | 4.137630863   | 0.00020574  | 13.93678867     |
| COX5B       | NM_001862    | 65.04926108  | 0.576214748   | 2.99E-07    | 112.8906563     |
| FLVCR1-AS1  | NR_027286    | 42.4803412   | 0.838074112   | 0.000622471 | 50.68804848     |
| MAGEF1      | NM_022149    | 59.15565137  | 1.480535904   | 1.93E-05    | 39.9555669      |
| SNAPC2      | NM_003083    | 47.83726739  | 5.410874362   | 0.00294632  | 8.840949575     |
| EIF1        | NM_005801    | 111.1148628  | 16.86282301   | 7.43E-06    | 6.589339323     |
| PRMT1       | NM_198318    | 30.27612436  | 0.27334336    | 0.000152807 | 110.7622456     |
| UNC45A      | NM_001039675 | 42.4803412   | 0.602900909   | 3.08E-05    | 70.45990566     |
| TMEM177     | NM_001105199 | 59.24941846  | 0.792601052   | 1.19E-06    | 74.75314132     |
| MRPL49      | NR_037568    | 51.95921139  | 4.895168727   | 0.000944841 | 10.6143862      |
| CARHSP1     | NM_001278260 | 78.99922461  | 1.914231356   | 3.53E-08    | 41.26942355     |
| BAMBI       | NM_012342    | 80.93250549  | 0.542867197   | 4.73E-10    | 149.0834332     |
| TYSND1      | NM_001040273 | 32.90770391  | 0.91359419    | 0.001393417 | 36.0200451      |
| STK16       | NR_026909    | 48.18641673  | 4.858203209   | 0.001623155 | 9.918567556     |
| C9orf16     | NM_024112    | 48.53556607  | 1.46812828    | 4.90E-05    | 33.05948582     |
| EEF1D       | NM_001130057 | 39.91660971  | 0.172907414   | 7.43E-06    | 230.8553971     |
| CATIP-AS1   | NR_110573    | 40.19791098  | 2.252141993   | 0.002824498 | 17.84874627     |
| MEPCE       | NM_001194991 | 107.5296023  | 6.431374526   | 1.96E-08    | 16.71953668     |

|              |              |             |             |             |             |
|--------------|--------------|-------------|-------------|-------------|-------------|
| RPL17        | NM_001199345 | 59.5985678  | 1.632069342 | 1.82E-06    | 36.51717868 |
| POLR3H       | NM_001282885 | 24.73166399 | 0.089519626 | 0.000783015 | 276.2708597 |
| ALG3         | NM_001006941 | 49.67678118 | 3.421109938 | 0.000506768 | 14.52066203 |
| PSMD8        | NM_002812    | 33.35062034 | 0.486806167 | 0.000622471 | 68.50903418 |
| ZNF771       | NM_016643    | 38.3583972  | 0.395456445 | 0.000248034 | 96.99777982 |
| KHNYN        | NM_001290257 | 53.44957584 | 1.445704199 | 1.25E-05    | 36.97130844 |
| ZBTB48       | NM_005341    | 50.81799628 | 4.598551863 | 0.000445886 | 11.05086945 |
| STMN3        | NM_015894    | 21.58931994 | 0.103942127 | 0.001340871 | 207.7051977 |
| APOA1BP      | NM_144772    | 62.92844603 | 4.573172147 | 4.61E-05    | 13.76034927 |
| ARFIP2       | NM_001242856 | 42.92325763 | 1.636637525 | 0.000173197 | 26.22648996 |
| SIGMAR1      | NM_001282207 | 82.32910284 | 3.321892791 | 1.11E-07    | 24.78379286 |
| DCXR         | NM_016286    | 104.0121899 | 12.97882456 | 1.83E-05    | 8.013991513 |
| LINC00115    | NR_024321    | 67.93622288 | 7.372662416 | 0.000392081 | 9.214611907 |
| RPL8         | NM_033301    | 74.15306291 | 6.587627928 | 1.77E-05    | 11.25641334 |
| FGF18        | NM_003862    | 26.94624613 | 0.033657789 | 0.000453324 | 800.5946589 |
| NOP14        | NM_001291979 | 29.57782568 | 0.312939309 | 0.001164973 | 94.51617255 |
| C2orf68      | NM_001013649 | 45.90398652 | 0.501795267 | 9.38E-06    | 91.4795128  |
| ILK          | NM_004517    | 35.63305056 | 1.286877141 | 0.001571561 | 27.68955126 |
| ACAP3        | NM_030649    | 24.66381592 | 0.554095378 | 0.00273407  | 44.51186001 |
| DDIT3        | NM_001195055 | 100.6823116 | 10.04861815 | 8.96E-07    | 10.01951812 |
| RPL7A        | NM_000972    | 63.37136246 | 5.742297703 | 0.000122452 | 11.03588942 |
| GCAT         | NM_014291    | 50.11969761 | 4.800530019 | 0.000454785 | 10.44045083 |
| RBM14        | NM_001198836 | 95.67453478 | 0.690218728 | 7.76E-12    | 138.6148055 |
| CHPF2        | NM_019015    | 37.21718209 | 0.61595979  | 0.000248034 | 60.42144747 |
| PSMG3        | NM_001134340 | 78.65007527 | 3.578554535 | 1.06E-06    | 21.9781687  |
| SLC25A3      | NM_002635    | 72.94399974 | 0.993617286 | 4.55E-09    | 73.41257118 |
| PPP1CA       | NM_001008709 | 53.98625936 | 5.96754044  | 0.001226448 | 9.046651614 |
| HNRNPH1      | NM_001257293 | 108.5770503 | 2.085665217 | 1.59E-11    | 52.05871462 |
| OSGEPL1-AS1  | NR_102429    | 35.9821999  | 0.875130191 | 0.000541407 | 41.11639648 |
| MFSD5        | NM_032889    | 43.27240697 | 1.946149083 | 0.000821993 | 22.23488804 |
| UNC119       | NM_005148    | 69.52035442 | 2.790828797 | 1.33E-06    | 24.91028991 |
| BTG2         | NM_006763    | 100.2393952 | 3.237948612 | 1.54E-09    | 30.95768562 |
| LBX2         | NM_001009812 | 45.55483718 | 3.040813261 | 0.000687497 | 14.98113606 |
| ATG4D        | NM_032885    | 60.39063357 | 0.676511292 | 2.71E-07    | 89.26773921 |
| SURF4        | NM_033161    | 43.97070564 | 0.199242867 | 2.60E-06    | 220.688983  |
| SEPW1        | NM_003009    | 70.12488601 | 3.32645258  | 4.46E-06    | 21.08098171 |
| CST3         | NM_000099    | 60.83355    | 0.351799621 | 8.47E-08    | 172.9210221 |
| ARF5         | NM_001662    | 46.6022852  | 0.209748337 | 1.41E-05    | 222.1819052 |
| ST6GALNAC2   | NM_006456    | 25.26834751 | 0.088734153 | 0.000783015 | 284.7646217 |
| RPL22L1      | NM_001099645 | 68.28537222 | 3.173128432 | 6.65E-06    | 21.51988918 |
| ARRDC1       | NM_152285    | 61.53184867 | 6.617354719 | 0.000201616 | 9.298556793 |
| BSG          | NM_198589    | 44.66900432 | 0.232729107 | 5.27E-06    | 191.935615  |
| HYAL3        | NM_001200031 | 42.13119186 | 2.378839248 | 0.001235362 | 17.71081921 |
| FUT4         | NM_002033    | 32.11563815 | 1.629037938 | 0.003490154 | 19.71448141 |
| LOC100289230 | NR_036530    | 79.0929917  | 5.278236453 | 9.16E-06    | 14.98473826 |
| DOLK         | NM_014908    | 57.31613758 | 4.380961238 | 0.000142599 | 13.08300495 |
| DUSP2        | NM_004418    | 42.92325763 | 1.909956115 | 0.000821993 | 22.47342612 |
| NUBP2        | NM_012225    | 45.11192075 | 2.561632604 | 0.000592344 | 17.61061312 |
| ZFP36        | NM_003407    | 87.08149745 | 20.58509118 | 0.001310207 | 4.230318763 |
| CDK10        | NR_027702    | 58.96811719 | 13.67029046 | 0.004313116 | 4.313596507 |
| KLC2         | NM_022822    | 37.21718209 | 1.587801769 | 0.001323324 | 23.43943862 |
| ACP2         | NM_001131064 | 82.67825218 | 1.342988491 | 1.96E-09    | 61.56288956 |
| PLCB3        | NM_000932    | 75.66934638 | 0.583550093 | 9.01E-09    | 129.6706954 |
| FUS          | NM_001170634 | 124.2986795 | 1.141588636 | 1.35E-15    | 108.8821976 |
| TNK1         | NM_001251902 | 51.16714562 | 6.004249523 | 0.001838411 | 8.521821991 |
| NXF1         | NM_006362    | 97.42028148 | 2.553121381 | 3.09E-09    | 38.15732468 |
| NIP7         | NM_016101    | 36.77426566 | 2.235908506 | 0.002334867 | 16.44712454 |
| MAT2A        | NM_005911    | 88.63970996 | 5.651527208 | 8.96E-07    | 15.68420477 |
| CDKN1C       | NM_001122631 | 41.68827543 | 2.643710508 | 0.001393417 | 15.76885037 |
| PPIB         | NM_000942    | 65.74755976 | 1.765882516 | 1.53E-06    | 37.23212568 |
| ZC3H12A      | NM_025079    | 34.93475188 | 2.102856523 | 0.003273375 | 16.61299832 |
| PAF1         | NR_046384    | 47.48811805 | 1.589044552 | 0.000104791 | 29.88469894 |

|              |              |             |             |             |             |
|--------------|--------------|-------------|-------------|-------------|-------------|
| LOC100288152 | NR_125375    | 30.71904079 | 1.687024621 | 0.004516165 | 18.20900561 |
| SNAI1        | NM_005985    | 93.92878809 | 2.631910855 | 3.17E-09    | 35.68843827 |
| FBXO41       | NM_001080410 | 50.2134647  | 0.68524007  | 1.23E-05    | 73.27864627 |
| IQCC         | NM_001160042 | 39.49961231 | 2.179136198 | 0.000855458 | 18.12627055 |
| CDAN1        | NM_138477    | 52.84504425 | 1.149629086 | 2.42E-05    | 45.96703832 |
| SNHG1        | NR_003098    | 89.87469216 | 5.247700729 | 1.92E-07    | 17.12648964 |
| CBX8         | NM_020649    | 26.75871195 | 0.216166898 | 0.003128863 | 123.7872784 |
| LOC100131691 | NR_027334    | 44.22608789 | 2.296342467 | 0.000634338 | 19.25936071 |
| AURKB        | NM_001284526 | 64.51257756 | 1.507052106 | 6.04E-07    | 42.80713143 |
| RPLP1        | NM_001003    | 81.9799535  | 13.92906613 | 0.000275998 | 5.885531216 |
| HNRNPAB      | NM_004499    | 96.81574989 | 7.470545796 | 2.45E-07    | 12.95966219 |
| SNHG7        | NR_024543    | 108.227901  | 17.11992979 | 9.55E-06    | 6.321749111 |
| PRDX1        | NM_181696    | 85.05444949 | 0.811775531 | 1.76E-10    | 104.7758232 |
| MARS2        | NM_138395    | 42.13119186 | 3.788497267 | 0.002975096 | 11.12081886 |
| MAP3K14-AS1  | NR_110326    | 47.39435096 | 0.619831888 | 4.51E-05    | 76.4632344  |
| ZNF646       | NM_014699    | 66.0967091  | 1.775776097 | 4.67E-07    | 37.22130803 |
| RCC1         | NM_001048199 | 58.01443626 | 10.83239785 | 0.00362953  | 5.355641205 |
| MBD3         | NM_001281453 | 27.38916256 | 0.692862956 | 0.001517149 | 39.53041844 |
| RPP25L       | NM_148179    | 53.1004265  | 4.664076587 | 0.000608965 | 11.38498168 |
| JMJD4        | NM_023007    | 80.8387384  | 3.526381391 | 1.92E-07    | 22.92399189 |
| SWI5         | NM_001040011 | 47.7435003  | 1.055271227 | 4.51E-05    | 45.24287131 |
| TP11         | NM_001159287 | 72.5948504  | 13.07519887 | 0.00143678  | 5.552102963 |
| CCND3        | NM_001760    | 29.22867635 | 0.116125087 | 0.001164973 | 251.6999309 |
| RPS20        | NM_001146227 | 107.8787516 | 6.277572414 | 7.54E-09    | 17.18478809 |
| RBMX         | NM_001164803 | 61.53184867 | 1.240489432 | 8.03E-07    | 49.60288019 |
| ARPC1B       | NM_005720    | 40.19791098 | 1.274151072 | 0.000969685 | 31.54877931 |
| TBCC         | NM_003192    | 59.24941846 | 5.475681163 | 0.0004965   | 10.82046538 |
| EIF5         | NM_001969    | 61.53184867 | 1.700741745 | 1.34E-06    | 36.17941927 |
| ASB6         | NM_001202403 | 55.03370737 | 8.668968594 | 0.003411781 | 6.34835699  |
| CEBPA        | NM_004364    | 117.1022396 | 6.954194298 | 2.52E-09    | 16.83908078 |
| PYGO2        | NM_138300    | 93.04295523 | 0.853443782 | 3.86E-11    | 109.0206024 |
| ISCA2        | NM_001272007 | 34.14268611 | 1.420956611 | 0.004950598 | 24.02795824 |
| FUT11        | NM_173540    | 66.44585844 | 5.649138068 | 8.14E-05    | 11.76212329 |
| HGH1         | NM_016458    | 129.910988  | 5.315420921 | 7.79E-11    | 24.44039521 |
| TSC22D1      | NM_006022    | 49.23386475 | 1.72540982  | 0.000104791 | 28.53459172 |
| TUBB3        | NM_006086    | 131.8442689 | 7.504877554 | 4.89E-10    | 17.56781079 |
| BAX          | NM_001291431 | 40.19791098 | 1.404066118 | 0.000305312 | 28.62964248 |
| SOCS2        | NM_001270467 | 27.64454481 | 0.759630236 | 0.004592544 | 36.39210697 |
| LOC102288414 | NR_104414    | 65.74755976 | 1.513701278 | 1.59E-06    | 43.4349635  |
| EIF3J-AS1    | NR_034170    | 42.13119186 | 2.977820736 | 0.001393417 | 14.14833047 |
| PGAM5        | NM_001170543 | 47.83726739 | 0.176471105 | 1.82E-06    | 271.0770551 |
| PDCD2        | NM_001199461 | 59.94771714 | 1.188824386 | 2.33E-06    | 50.42604933 |
| CSTB         | NM_000100    | 64.60634465 | 3.933062155 | 1.65E-05    | 16.42647436 |
| SRXN1        | NM_080725    | 47.83726739 | 2.731875036 | 0.00035399  | 17.5107817  |
| WDR55        | NM_017706    | 83.12116861 | 0.69770722  | 3.56E-10    | 119.1347405 |
| CHCHD7       | NM_024300    | 81.53703707 | 1.108911875 | 1.54E-09    | 73.52887001 |
| SNHG12       | NR_024127    | 90.66675793 | 15.86146636 | 8.75E-05    | 5.716164941 |
| KAT5         | NM_182710    | 51.61006205 | 5.569260365 | 0.001561266 | 9.266950847 |
| GAMT         | NM_000156    | 51.95921139 | 2.190491062 | 5.66E-05    | 23.7203485  |
| ATP5SL       | NM_001167869 | 26.31579552 | 0.308699879 | 0.001146127 | 85.24718433 |
| RPL31        | NM_000993    | 66.35209135 | 3.230927107 | 9.16E-06    | 20.53654854 |
| RPS23        | NM_001025    | 37.47256434 | 2.706558683 | 0.00441315  | 13.84509583 |
| LSM5         | NM_001139499 | 34.49183545 | 0.288245771 | 0.000442812 | 119.6612021 |
| ELOVL1       | NM_001256401 | 59.24941846 | 6.587951718 | 0.000536357 | 8.993602412 |
| PABPC4       | NM_001135654 | 78.65007527 | 0.468880082 | 5.23E-10    | 167.740278  |
| SMTN         | NM_006932    | 91.4588237  | 3.19140122  | 9.45E-08    | 28.65788956 |
| LOC101928069 | NR_120586    | 57.66528692 | 3.971936451 | 6.81E-05    | 14.51817964 |
| INO80B       | NM_031288    | 40.98997675 | 1.912442735 | 0.000667791 | 21.43330935 |
| GRINA        | NM_000837    | 64.25719532 | 2.278550641 | 5.46E-06    | 28.20090727 |
| POLG         | NM_002693    | 88.47809481 | 1.02357176  | 8.60E-10    | 86.44053914 |
| FBXW5        | NM_018998    | 38.3583972  | 2.604071899 | 0.003400444 | 14.73016056 |
| COMMD5       | NM_014066    | 49.23386475 | 2.690637366 | 0.000348275 | 18.29821639 |

|          |              |             |             |             |             |
|----------|--------------|-------------|-------------|-------------|-------------|
| TIMM8B   | NM_012459    | 42.4803412  | 3.515550023 | 0.004310868 | 12.08355475 |
| MIDN     | NM_177401    | 123.6003809 | 17.6450415  | 5.21E-07    | 7.004822339 |
| MSRB1    | NM_016332    | 36.68049857 | 0.384362579 | 0.000104768 | 95.43202315 |
| LENG1    | NM_024316    | 49.32763184 | 3.998819682 | 0.001061695 | 12.33554793 |
| C7orf49  | NM_001243751 | 60.20309939 | 5.675683455 | 0.000145942 | 10.60719821 |
| TRAF4    | NM_004295    | 80.58335615 | 1.651755977 | 1.55E-08    | 48.78647772 |
| SNX22    | NR_073534    | 50.91176337 | 6.03073203  | 0.001313256 | 8.442053655 |
| SNAPIN   | NR_052020    | 42.13119186 | 5.917209242 | 0.004678458 | 7.120111887 |
| RPS16    | NM_001020    | 56.08115539 | 6.800976285 | 0.00143678  | 8.246044838 |
| WWC2-AS2 | NR_024008    | 33.001471   | 1.774376855 | 0.002070835 | 18.59890751 |
| SRSF2    | NM_003016    | 74.94512868 | 10.00573272 | 0.0002026   | 7.490218937 |
| IPO4     | NM_024658    | 46.69605229 | 0.927935494 | 4.74E-05    | 50.32251982 |
| SH3GL1   | NM_003025    | 32.20940524 | 0.824691895 | 0.001517149 | 39.05628932 |
| RPL14    | NM_003973    | 65.30464333 | 1.593813973 | 6.04E-07    | 40.9738178  |
| MRPS16   | NM_016065    | 58.10820335 | 0.892447134 | 1.19E-06    | 65.11108743 |
| PDE12    | NM_177966    | 42.38657411 | 0.363342133 | 1.41E-05    | 116.6574702 |
| ESPN     | NM_031475    | 103.7568076 | 3.588101563 | 1.61E-08    | 28.91690935 |
| PHLDA2   | NM_003311    | 85.84651525 | 9.959179081 | 0.000112579 | 8.619838498 |
| ANGPTL4  | NR_104213    | 95.76830188 | 0.723501612 | 9.89E-13    | 132.3677795 |
| GRHPR    | NM_012203    | 56.96698825 | 1.582274169 | 9.69E-06    | 36.00323468 |
| SLC3A2   | NM_001012664 | 48.18641673 | 0.137795438 | 5.67E-07    | 349.6952968 |
| RCE1     | NM_005133    | 52.05297848 | 5.30928311  | 0.001620287 | 9.804144439 |
| RPL19    | NM_000981    | 71.70901754 | 2.85334694  | 1.48E-06    | 25.13154518 |
| METTTL23 | NM_001206983 | 56.08115539 | 5.085258533 | 0.000374189 | 11.02818176 |
| IER5L    | NM_203434    | 84.61153306 | 14.54247676 | 0.000159813 | 5.818234021 |
| RBM8A    | NM_005105    | 49.67678118 | 0.491812057 | 3.48E-06    | 101.0076521 |
| DDIT4    | NM_019058    | 109.9736477 | 10.782932   | 6.64E-07    | 10.19886314 |
| ERF      | NM_006494    | 54.33540869 | 7.966773912 | 0.003255631 | 6.820252375 |
| RDH13    | NR_027382    | 60.73978291 | 3.241169212 | 1.79E-05    | 18.74008388 |
| RPS15    | NM_001018    | 76.01849572 | 7.245639668 | 1.93E-05    | 10.49161968 |
| TMEM120A | NM_031925    | 35.63305056 | 2.352642796 | 0.00302865  | 15.14596717 |
| MIR22HG  | NR_028505    | 48.9784825  | 2.47498604  | 0.000173569 | 19.78939748 |
| CHRAC1   | NM_017444    | 59.85395005 | 6.286558285 | 0.000202999 | 9.520940924 |
| PRR13    | NM_018457    | 40.19791098 | 0.730137841 | 6.53E-05    | 55.05523575 |
| P4HB     | NM_000918    | 50.37507985 | 0.247639396 | 2.00E-07    | 203.4211062 |
| SRSF7    | NM_001031684 | 83.56408504 | 1.250685776 | 3.17E-09    | 66.81461216 |
| DUSP1    | NM_004417    | 88.12894547 | 4.147535162 | 2.02E-07    | 21.24851075 |
| SNF8     | NM_007241    | 63.7205118  | 0.787124675 | 4.63E-07    | 80.95351828 |
| SLC50A1  | NM_001122837 | 80.04667263 | 4.312604893 | 2.22E-06    | 18.56109581 |
| CILP2    | NM_153221    | 31.51110656 | 0.101894336 | 5.25E-05    | 309.252779  |
| COX7A2   | NR_029466    | 46.34690295 | 1.501580534 | 5.66E-05    | 30.86541273 |
| QARS     | NM_005051    | 21.2401706  | 0.063188142 | 0.003848688 | 336.1417163 |
| SRSF5    | NM_001039465 | 88.38432772 | 4.393508006 | 2.21E-07    | 20.11702894 |
| RPL12    | NM_000976    | 94.88246902 | 12.70483327 | 1.54E-05    | 7.468218353 |
| RPL27A   | NM_000990    | 82.42286993 | 11.24684527 | 4.73E-05    | 7.328532397 |
| FTH1     | NM_002032    | 50.85992533 | 1.666154023 | 1.93E-05    | 30.52534437 |
| MRPL20   | NM_017971    | 42.38657411 | 4.086886043 | 0.001731657 | 10.37136188 |
| PTMS     | NM_002824    | 41.08374384 | 0.811119282 | 6.53E-05    | 50.65068083 |
| EMC9     | NM_016049    | 92.69380589 | 8.350699533 | 4.34E-06    | 11.10012467 |
| SLC2A6   | NM_001145099 | 35.9821999  | 2.030733136 | 0.001323324 | 17.71882246 |
| DHPS     | NM_001930    | 49.32763184 | 1.45572183  | 2.34E-05    | 33.88534185 |
| NUDT18   | NM_024815    | 59.24941846 | 3.539924755 | 6.45E-05    | 16.73747963 |
| ACTB     | NM_001101    | 80.04667263 | 17.10549344 | 0.000902371 | 4.679588632 |
| CYBA     | NM_000101    | 64.16342823 | 2.686327416 | 1.02E-05    | 23.88518534 |
| RPL3     | NM_001033853 | 88.82724414 | 8.660795435 | 2.41E-06    | 10.25624549 |
| RPL4     | NM_000968    | 59.41103362 | 0.419116924 | 2.92E-08    | 141.752886  |
| MOGS     | NM_001146158 | 45.11192075 | 4.538327632 | 0.002585238 | 9.940208026 |
| STK4-AS1 | NR_038341    | 30.27612436 | 0.735302494 | 0.00339551  | 41.17506007 |
| BAIAP2   | NM_006340    | 94.62708677 | 0.865475846 | 5.20E-10    | 109.3353295 |
| NDNL2    | NM_138704    | 56.96698825 | 4.984620855 | 0.001050482 | 11.42854991 |
| PIGY     | NM_001042616 | 76.62302731 | 0.661490932 | 1.55E-08    | 115.8338288 |
| EEF2     | NM_001961    | 68.79613672 | 5.173856518 | 4.44E-05    | 13.29687758 |

|                |              |             |             |             |             |
|----------------|--------------|-------------|-------------|-------------|-------------|
| FAM214B        | NM_025182    | 21.68308703 | 0.353686888 | 0.003724389 | 61.3058831  |
| C22orf29       | NM_024627    | 91.55259079 | 1.867720254 | 1.54E-09    | 49.01836373 |
| SF3B4          | NM_005850    | 54.68455803 | 0.832688413 | 5.34E-06    | 65.67229368 |
| ZC3H10         | NM_032786    | 60.39063357 | 0.791868588 | 4.58E-07    | 76.26345393 |
| ATP6V0C        | NM_001694    | 55.12747446 | 1.488542771 | 2.41E-05    | 37.034525   |
| RPL36A-HNRNPH2 | NM_001199974 | 28.08746124 | 0.497907616 | 0.001517149 | 56.41098937 |
| CDC20          | NM_001255    | 58.10820335 | 5.876872814 | 0.000761653 | 9.887606077 |
| ZNF296         | NM_145288    | 72.50108331 | 3.037969912 | 2.17E-06    | 23.8649774  |
| ZNF575         | NM_174945    | 34.93475188 | 0.757462157 | 0.001368939 | 46.12078839 |
| C12orf57       | NM_138425    | 102.5218254 | 17.05783619 | 4.38E-05    | 6.010247976 |
| INTS5          | NM_030628    | 79.16083977 | 2.785928539 | 5.89E-08    | 28.41452631 |
| C19orf52       | NM_138358    | 43.6215563  | 3.008184503 | 0.002679417 | 14.50095772 |
| MYC            | NM_002467    | 65.65379267 | 2.151974082 | 1.28E-06    | 30.5086354  |
| BTG1           | NM_001731    | 70.66156953 | 0.120391366 | 1.25E-09    | 586.9322035 |
| GAS6-AS1       | NR_044995    | 38.70754654 | 2.742913412 | 0.001840042 | 14.11183684 |
| C11orf31       | NM_170746    | 76.36764506 | 6.578096896 | 1.65E-05    | 11.60938282 |
| TRIM47         | NM_033452    | 55.82577314 | 1.493423439 | 4.67E-06    | 37.38107469 |
| MCL1           | NM_182763    | 57.66528692 | 2.661019494 | 2.11E-05    | 21.67037373 |
| SLC52A2        | NM_001253816 | 73.64229842 | 1.440549424 | 1.90E-07    | 51.1209801  |
| RPL36AL        | NM_001001    | 51.95921139 | 5.69623985  | 0.002690547 | 9.121668462 |
| TUBA4A         | NM_006000    | 75.4818122  | 8.049131339 | 7.88E-05    | 9.377634557 |
| RABGGTB        | NR_073562    | 50.81799628 | 0.929576676 | 8.05E-06    | 54.66789089 |
| TMEM256-PLSCR3 | NR_037719    | 63.37136246 | 5.536810926 | 6.34E-05    | 11.44546261 |
| TMEM249        | NM_001252404 | 61.53184867 | 3.943766708 | 0.000173197 | 15.6023044  |
| COQ10A         | NM_144576    | 46.6022852  | 2.685548469 | 0.000338944 | 17.35298608 |
| BETIL          | NM_016526    | 48.9784825  | 4.733049255 | 0.001473975 | 10.34818779 |
| SLC10A3        | NM_001142391 | 65.39841042 | 2.433625221 | 3.06E-06    | 26.87283558 |
| ZNF687         | NM_020832    | 40.98997675 | 0.586078809 | 0.000134586 | 69.93935988 |
| BUD31          | NM_003910    | 48.09264964 | 1.786678842 | 7.20E-05    | 26.91734435 |
| SRRT           | NM_015908    | 38.3583972  | 0.523149755 | 0.000513668 | 73.32202073 |
| REEP4          | NM_025232    | 45.11192075 | 4.8878838   | 0.002585238 | 9.22933576  |
| NPM3           | NM_006993    | 66.00294201 | 8.770495056 | 0.000497051 | 7.525566298 |
| COPS6          | NM_006833    | 55.03370737 | 2.69767686  | 8.75E-05    | 20.40040755 |
| RRP7A          | NM_015703    | 55.73200605 | 3.084542919 | 0.000101294 | 18.0681571  |
| SQSTM1         | NM_003900    | 84.8669153  | 2.69464073  | 1.58E-07    | 31.49470516 |
| NT5C           | NM_001252377 | 75.4818122  | 15.08210274 | 0.003152595 | 5.004727359 |
| EIF4A2         | NM_001967    | 77.06594374 | 3.654119572 | 1.34E-06    | 21.09015379 |
| GAPDH          | NM_001289745 | 92.69380589 | 19.0914586  | 0.000347855 | 4.855250081 |
| NDOR1          | NM_001144026 | 46.25313586 | 0.462756788 | 2.88E-05    | 99.9512855  |
| EFNA3          | NM_004952    | 58.10820335 | 5.067867693 | 0.00012427  | 11.46600639 |
| C5orf45        | NM_001017987 | 52.56374298 | 1.061662509 | 4.82E-05    | 49.51078382 |
| BANF1          | NM_003860    | 57.31613758 | 10.75226357 | 0.004179544 | 5.330611291 |
| ZFAS1          | NR_036659    | 70.91695178 | 7.992436246 | 0.00014846  | 8.873008128 |
| LINC00659      | NR_046224    | 56.96698825 | 5.706819211 | 0.000365772 | 9.982266153 |
| FASTK          | NM_001258461 | 51.95921139 | 4.50262389  | 0.000660938 | 11.53976274 |
| WDR24          | NM_032259    | 72.85023265 | 2.55270582  | 4.34E-07    | 28.53843638 |
| RHOB           | NM_004040    | 77.76424242 | 5.270349328 | 1.36E-05    | 14.75504517 |
| NSMF           | NM_001130971 | 32.20940524 | 0.670522822 | 0.003135168 | 48.03625495 |
| ESRRA          | NM_001282450 | 27.64454481 | 0.174699656 | 0.000277058 | 158.2404077 |
| TMEM52         | NM_178545    | 50.02593052 | 2.47150991  | 0.000145942 | 20.24103982 |
| TNFRSF12A      | NM_016639    | 120.5258849 | 27.4331757  | 0.000119489 | 4.393435386 |
| RPP38          | NM_006414    | 62.23014735 | 3.677368146 | 1.53E-05    | 16.9224687  |
| ILF3-AS1       | NR_024333    | 42.57410829 | 0.923718031 | 0.000342113 | 46.08993963 |
| RECQL4         | NM_004260    | 50.72422919 | 7.419081431 | 0.001709034 | 6.836995882 |
| PMAIP1         | NM_021127    | 81.72457126 | 1.83290074  | 9.44E-09    | 44.58755975 |
| PNRC1          | NM_006813    | 64.95549399 | 3.835416395 | 1.41E-05    | 16.93570849 |
| UBA1           | NM_003334    | 39.94252874 | 0.15928328  | 7.43E-06    | 250.7641016 |
| LGALS1         | NM_002305    | 64.06966113 | 6.939232321 | 0.000254731 | 9.232960964 |
| ECI1           | NM_001178029 | 35.19013413 | 0.538957252 | 0.001017099 | 65.2929968  |
| SIRT7          | NM_016538    | 70.56780244 | 0.973840168 | 4.50E-08    | 72.46343368 |
| KRTCAP3        | NM_173853    | 37.56633143 | 1.213355684 | 0.002070835 | 30.96069185 |
| NCPB2-AS2      | NR_024388    | 58.45735269 | 2.863021722 | 0.000275998 | 20.41806118 |

|            |              |             |             |             |             |
|------------|--------------|-------------|-------------|-------------|-------------|
| ZFP36L2    | NM_006887    | 40.98997675 | 0.377057052 | 1.83E-05    | 108.7102775 |
| SREBF1     | NM_004176    | 63.37136246 | 0.183212054 | 5.07E-09    | 345.8907911 |
| TPT1       | NM_001286273 | 51.51629496 | 6.401410102 | 0.001760719 | 8.047647962 |
| XRCC3      | NM_001100118 | 48.9784825  | 2.75364312  | 0.000209087 | 17.78679384 |
| RPS5       | NM_001009    | 59.5985678  | 2.598323523 | 1.93E-05    | 22.93731603 |
| CCNL1      | NM_020307    | 50.11969761 | 0.135272742 | 6.75E-07    | 370.5084768 |
| RPUSD3     | NM_001142547 | 41.33912609 | 2.30465664  | 0.002355476 | 17.93721692 |
| ANKRD54    | NM_138797    | 40.64082741 | 0.204820884 | 7.43E-06    | 198.4213066 |
| NECAB3     | NM_031231    | 38.26463011 | 2.205543819 | 0.002567973 | 17.34929489 |
| HEIH       | NR_045680    | 34.84098479 | 0.482774919 | 0.00286492  | 72.16817484 |
| TMEM179B   | NM_199337    | 67.49330646 | 8.579882635 | 0.000163904 | 7.866460338 |
| MAFF       | NM_012323    | 26.85247904 | 0.373559104 | 0.001786166 | 71.88281258 |
| PNMA1      | NM_006029    | 41.94365768 | 3.545751817 | 0.002026621 | 11.82927059 |
| JUN        | NM_002228    | 37.82171368 | 3.73226186  | 0.003725235 | 10.13372456 |
| EPPK1      | NM_031308    | 25.80503103 | 0.713860803 | 0.002982824 | 36.14854735 |
| FAM53C     | NM_016605    | 69.86950376 | 0.946810653 | 7.91E-08    | 73.79458984 |
| CNP        | NM_033133    | 55.73200605 | 0.619430078 | 9.98E-07    | 89.97303818 |
| RAB3A      | NM_002866    | 36.07596699 | 1.077385039 | 0.000608965 | 33.48474841 |
| CHTF18     | NM_022092    | 21.58931994 | 0.067608196 | 0.001340871 | 319.3299231 |
| VPS9D1     | NM_004913    | 127.5347907 | 4.267224153 | 3.51E-11    | 29.88706149 |
| CSNK1D     | NR_110578    | 51.70382914 | 0.579862248 | 3.74E-06    | 89.16571022 |
| LAMTOR1    | NM_017907    | 41.33912609 | 0.85579486  | 0.000134586 | 48.30494786 |
| GAS5       | NR_002578    | 107.0866859 | 6.182673812 | 1.39E-08    | 17.3204489  |
| SHARPIN    | NM_030974    | 62.92844603 | 12.81315979 | 0.004467837 | 4.911235563 |
| RELL2      | NM_173828    | 40.54706032 | 1.383965488 | 0.000667791 | 29.29773948 |
| RPLP0      | NM_053275    | 84.35615081 | 15.28176128 | 0.000155145 | 5.520054217 |
| PTMA       | NM_002823    | 87.43064679 | 15.38236304 | 0.000104935 | 5.683824166 |
| GLI4       | NM_138465    | 70.91695178 | 14.19340194 | 0.001492071 | 4.996473156 |
| MEF2BNB    | NM_001145784 | 42.38657411 | 0.74123405  | 0.000173197 | 57.18379252 |
| TRIM52     | NM_032765    | 61.18269933 | 0.227152826 | 8.47E-08    | 269.3459742 |
| PRELID1    | NM_001271828 | 62.32391444 | 7.596414496 | 0.000573104 | 8.204385698 |
| LAMTOR4    | NM_001008395 | 40.98997675 | 0.256684289 | 1.83E-05    | 159.690244  |
| RHOV       | NM_133639    | 53.89249226 | 2.277040293 | 9.68E-05    | 23.66778156 |
| RBM4B      | NM_001286135 | 41.33912609 | 1.724813398 | 0.000859708 | 23.96730344 |
| PAGR1      | NM_024516    | 54.49702385 | 4.265465418 | 0.000138706 | 12.77633705 |
| EXOSC4     | NM_019037    | 69.33282024 | 0.704774167 | 1.14E-07    | 98.37593866 |
| H2AFZ      | NM_002106    | 74.52813128 | 5.267740932 | 7.11E-06    | 14.14802517 |
| HNRNPA1    | NM_002136    | 68.28537222 | 5.07606763  | 4.82E-05    | 13.45241577 |
| APEH       | NM_001640    | 43.6215563  | 0.759409499 | 9.06E-05    | 57.44141515 |
| ZFYVE21    | NM_024071    | 39.84876165 | 0.092047806 | 4.32E-06    | 432.9137575 |
| POLR2L     | NM_021128    | 66.88877487 | 14.26439864 | 0.003557666 | 4.689210989 |
| RPS2       | NM_002952    | 114.2831258 | 22.39986895 | 4.43E-05    | 5.10195511  |
| TRNP1      | NM_001013642 | 70.75533662 | 6.900879746 | 2.23E-05    | 10.25308935 |
| HTR7P1     | NR_002774    | 74.87728062 | 2.013072929 | 2.22E-07    | 37.19551316 |
| SNRNP25    | NM_024571    | 29.92697502 | 0.402411605 | 0.001164973 | 74.36906546 |
| SMARCD2    | NM_001098426 | 38.96292879 | 0.350408333 | 9.78E-05    | 111.1929286 |
| MGC72080   | NR_002822    | 38.3583972  | 0.254631113 | 5.33E-05    | 150.6430096 |
| ABCA7      | NM_019112    | 53.79872517 | 0.779428923 | 1.78E-05    | 69.02325994 |
| ATPIF1     | NM_178190    | 62.92844603 | 3.432819257 | 5.66E-05    | 18.33141838 |
| TMED4      | NM_182547    | 60.39063357 | 5.470958091 | 0.000201616 | 11.03840179 |
| MKNK2      | NM_017572    | 101.9172938 | 5.071605557 | 2.98E-08    | 20.09566649 |
| TPRN       | NM_001128228 | 82.07372059 | 3.042365016 | 9.37E-08    | 26.97694726 |
| ZBTB3      | NM_024784    | 27.64454481 | 0.864210031 | 0.00286492  | 31.98822488 |
| SERTAD3    | NM_203344    | 52.05297848 | 3.467303147 | 0.000325946 | 15.01252595 |
| SPATA2L    | NM_152339    | 73.99144776 | 13.92684267 | 0.000589525 | 5.312865917 |
| SOCS3      | NM_003955    | 96.81574989 | 3.373788516 | 8.73E-09    | 28.69644894 |
| POP5       | NM_015918    | 44.41362207 | 3.380725876 | 0.000783163 | 13.13730356 |
| GADD45GIP1 | NM_052850    | 58.80650203 | 2.329739233 | 1.28E-05    | 25.24166705 |
| HMGN2      | NM_005517    | 41.68827543 | 3.470523679 | 0.001152829 | 12.01209941 |
| EEF1A1     | NM_001402    | 651.675755  | 81.8984079  | 2.43E-37    | 7.957123609 |
| MLST8      | NM_001199174 | 39.49961231 | 2.423418579 | 0.00123671  | 16.29912911 |
| SLC9A3R1   | NM_004252    | 117.0084725 | 0.030847016 | 2.90E-19    | 3793.186093 |

|                        |              |             |             |             |             |
|------------------------|--------------|-------------|-------------|-------------|-------------|
| NFE2L3                 | NM_004289    | 45.64860427 | 1.796500116 | 0.00048702  | 25.4097419  |
| MESDC1                 | NM_022566    | 41.68827543 | 1.801355529 | 0.000280178 | 23.14272488 |
| FBXL6                  | NM_024555    | 65.65379267 | 7.132371283 | 0.00025462  | 9.205044167 |
| FAM173A                | NM_023933    | 93.48587166 | 11.39597477 | 4.59E-05    | 8.203411602 |
| SOX4                   | NM_003107    | 49.77054827 | 0.697385656 | 3.48E-06    | 71.36732427 |
| RNF40                  | NM_014771    | 19.91142131 | 0.092417669 | 0.003848688 | 215.4503725 |
| MDP1                   | NM_001199822 | 48.9784825  | 4.148257297 | 0.001415882 | 11.80700207 |
| PDLIM7                 | NM_213636    | 92.6000388  | 8.415267398 | 1.39E-06    | 11.00381419 |
| FTSJ3                  | NM_017647    | 80.04667263 | 5.723695455 | 2.93E-06    | 13.98513832 |
| LOC100129917           | NR_036512    | 73.64229842 | 8.401021622 | 0.000272055 | 8.765874168 |
| RPL29                  | NM_000992    | 59.15565137 | 2.216940731 | 1.70E-05    | 26.68346093 |
| SNHG5                  | NR_003038    | 100.3331623 | 6.841446572 | 6.86E-07    | 14.66548942 |
| KRT19                  | NM_002276    | 46.95143453 | 7.122562476 | 0.004296191 | 6.591930178 |
| RPL32                  | NM_001007073 | 63.46512955 | 1.390758798 | 1.84E-06    | 45.63345538 |
| TRIM72                 | NM_001008274 | 26.94624613 | 0.474639074 | 0.001786166 | 56.77207712 |
| ID2                    | NM_002166    | 75.13266286 | 10.72383669 | 0.000347855 | 7.006136426 |
| FHOD1                  | NM_013241    | 51.51629496 | 2.281793309 | 9.44E-05    | 22.57710844 |
| GPAA1                  | NM_003801    | 70.66156953 | 4.434347518 | 1.06E-05    | 15.93505453 |
| COX8A                  | NM_004074    | 61.08893224 | 3.128251904 | 9.06E-05    | 19.52813716 |
| MARCKSL1               | NR_052852    | 76.46141215 | 9.981996743 | 0.000156513 | 7.659931587 |
| TCTA                   | NM_022171    | 44.76277141 | 5.594288965 | 0.003128863 | 8.001512201 |
| RPS4X                  | NM_001007    | 55.82577314 | 2.226658609 | 1.32E-05    | 25.07154573 |
| CHPF                   | NM_024536    | 67.68084064 | 1.846518978 | 2.38E-07    | 36.65320608 |
| RPS9                   | NM_001013    | 117.4513889 | 5.487371126 | 7.59E-10    | 21.40394484 |
| SLC7A5P2               | NR_002594    | 128.3268565 | 8.828842657 | 3.31E-09    | 14.53495791 |
| SELM                   | NM_080430    | 60.73978291 | 6.941428718 | 0.000754517 | 8.750328696 |
| GNG13                  | NM_016541    | 51.26091271 | 4.279113808 | 0.000944841 | 11.97932914 |
| H2AFX                  | NM_002105    | 126.4873427 | 25.69643382 | 3.63E-05    | 4.922369522 |
| RTCA-AS1               | NR_110435    | 38.70754654 | 2.901754493 | 0.004255015 | 13.33935956 |
| TOB2                   | NM_016272    | 104.5488734 | 3.506785997 | 9.71E-10    | 29.81330297 |
| RPL10A                 | NM_007104    | 89.17639348 | 12.45753937 | 5.04E-05    | 7.158427589 |
| DDX56                  | NM_001257189 | 35.28390122 | 1.659735337 | 0.002620553 | 21.25875159 |
| CYTH2                  | NM_004228    | 39.49961231 | 3.122652631 | 0.001366194 | 12.64937762 |
| LINC00476              | NR_023389    | 58.80650203 | 1.912841157 | 5.70E-06    | 30.74301378 |
| MSX1                   | NM_002448    | 101.4743774 | 3.947455102 | 1.81E-09    | 25.70627779 |
| THAP7                  | NM_030573    | 69.07743799 | 12.42782884 | 0.001340516 | 5.558286879 |
| KLF16                  | NM_031918    | 22.82430213 | 0.238554189 | 0.002982824 | 95.67764124 |
| RPL23                  | NM_000978    | 76.01849572 | 2.675790635 | 1.30E-07    | 28.40973234 |
| GADD45A                | NM_001924    | 105.6900885 | 15.14870515 | 9.80E-06    | 6.976839767 |
| MRPL16                 | NM_017840    | 52.21459364 | 1.446958514 | 2.72E-05    | 36.0857572  |
| TNFSF9                 | NM_003811    | 75.03889577 | 3.000007155 | 9.92E-07    | 25.0129056  |
| C9orf142               | NM_183241    | 47.83726739 | 3.556431073 | 0.001588574 | 13.45091931 |
| SAT1                   | NM_002970    | 52.84504425 | 1.726929523 | 8.91E-05    | 30.60057954 |
| TPIIIP2                | NR_002187    | 52.40212782 | 1.120290102 | 2.06E-05    | 46.77549834 |
| DOK4                   | NM_018110    | 35.37766831 | 0.492865751 | 0.000164358 | 71.77952255 |
| STAG3L5P-PVRIG2P-PILRB | NR_036569    | 88.22271256 | 0.250443285 | 2.06E-12    | 352.2662325 |
| RBM14-RBM4             | NM_001198846 | 95.67453478 | 0.976171682 | 6.33E-10    | 98.00994699 |
| DUS1L                  | NM_022156    | 45.99775361 | 2.263149692 | 0.000144286 | 20.32466247 |
| RPL13AP5               | NR_026712    | 106.3883872 | 16.420353   | 8.47E-06    | 6.479056033 |
| RPS6                   | NM_001010    | 85.05444949 | 0.424182156 | 1.63E-10    | 200.5139731 |
| EME2                   | NM_001257370 | 51.95921139 | 3.822082102 | 0.00027856  | 13.59447809 |
| ENDOG                  | NM_004435    | 56.96698825 | 8.735370869 | 0.001207421 | 6.521416103 |
| LOC283335              | NR_033854    | 52.05297848 | 3.026104917 | 0.000359058 | 17.20131321 |
| SLX1B                  | NM_024044    | 170.176747  | 22.01985185 | 2.52E-09    | 7.728332969 |
| HSF1                   | NM_005526    | 79.34837395 | 0.759028624 | 7.32E-09    | 104.5393697 |
| UBE2S                  | NM_014501    | 96.46660055 | 8.91650642  | 1.36E-06    | 10.81887861 |
| C2orf47                | NM_024520    | 92.69380589 | 0.176487723 | 1.50E-13    | 525.2139028 |
| EFNA1                  | NM_182685    | 43.6215563  | 1.856393281 | 0.000218586 | 23.49801454 |
| INO80B-WBP1            | NR_037849    | 40.98997675 | 2.250407392 | 0.002171164 | 18.21446948 |
| CIB1                   | NM_001277764 | 30.36989145 | 1.18383937  | 0.001528375 | 25.65372653 |
| ABHD14A-ACY1           | NR_037192    | 46.69605229 | 0.752149166 | 6.63E-05    | 62.08349936 |
| CPSF1                  | NM_013291    | 100.4947775 | 5.815035399 | 1.09E-07    | 17.28188576 |

|              |              |             |             |             |             |
|--------------|--------------|-------------|-------------|-------------|-------------|
| NFE2L1       | NM_003204    | 71.01071887 | 0.921666478 | 3.89E-08    | 77.04600369 |
| UQCRQ        | NM_014402    | 80.14043972 | 6.611414759 | 9.53E-06    | 12.12152658 |
| INPP5E       | NM_019892    | 33.35062034 | 0.37188772  | 8.14E-05    | 89.67927289 |
| SRPR         | NM_001177842 | 38.96292879 | 1.792578088 | 0.000348275 | 21.73569399 |
| MICALL2      | NM_182924    | 108.227901  | 0.576957012 | 3.06E-13    | 187.5839944 |
| TUBA1B       | NM_006082    | 76.36764506 | 14.53256898 | 0.000598157 | 5.254930849 |
| TTC32        | NM_001008237 | 35.72681765 | 0.199436441 | 5.33E-05    | 179.1388645 |
| LENG8        | NM_052925    | 61.43808158 | 2.090399998 | 2.77E-06    | 29.39058632 |
| OAZ1         | NM_004152    | 110.1611818 | 4.878458554 | 1.25E-09    | 22.58114538 |
| TMEM223      | NM_001080501 | 99.54109653 | 10.78940718 | 6.58E-06    | 9.225817036 |
| GPS2         | NM_004489    | 59.15565137 | 9.05115569  | 0.002762003 | 6.53570145  |
| SOCS1        | NM_003745    | 145.2834679 | 10.582169   | 1.54E-09    | 13.72908218 |
| MRPS26       | NM_030811    | 60.39063357 | 3.062911092 | 3.79E-05    | 19.71674389 |
| THOC6        | NM_001142350 | 60.73978291 | 2.332078737 | 1.66E-05    | 26.04533969 |
| SOWAHC       | NM_023016    | 67.23792421 | 0.975019738 | 4.31E-08    | 68.96057752 |
| LOC101928068 | NR_111907    | 33.35062034 | 0.15879734  | 0.000148229 | 210.0200188 |
| MIR17HG      | NR_027349    | 30.81280788 | 0.174929628 | 0.000414507 | 176.14402   |
| ARL4D        | NM_001661    | 39.40584522 | 0.967662825 | 0.000855458 | 40.72270238 |
| IRF2BP1      | NM_015649    | 52.05297848 | 5.554143351 | 0.001226448 | 9.371918439 |
| GADD45B      | NM_015675    | 68.28537222 | 15.22239911 | 0.003480965 | 4.485848237 |
| ARPC5L       | NM_030978    | 82.07372059 | 0.867493139 | 1.54E-09    | 94.6102245  |
| RRAGA        | NM_006570    | 61.88099801 | 1.219566195 | 8.04E-06    | 50.74017161 |
| LRWD1        | NM_152892    | 74.43436419 | 4.586176873 | 7.74E-06    | 16.23015558 |
| CTC-338M12.4 | NR_109909    | 37.91548077 | 0.156351073 | 1.23E-05    | 242.5022095 |
| GNB2L1       | NM_006098    | 53.00665941 | 2.91637002  | 8.96E-05    | 18.17556039 |
| SLC25A30-AS1 | NR_047031    | 40.54706032 | 0.635385557 | 0.000104768 | 63.81489145 |
| UQCC3        | NM_001085372 | 81.28165483 | 13.72417722 | 0.000660938 | 5.922515683 |
| TUBA1C       | NM_032704    | 119.2909027 | 2.322094955 | 2.42E-12    | 51.37210363 |
| LRRC73       | NM_001012974 | 40.29167807 | 0.769765026 | 0.000206927 | 52.34282764 |
| IRF7         | NM_001572    | 69.33282024 | 13.01709618 | 0.002421482 | 5.32628931  |
| C1orf213     | NR_033690    | 62.92844603 | 1.51116684  | 1.59E-06    | 41.64228882 |
| TRIM28       | NM_005762    | 80.23420681 | 3.928126683 | 7.15E-07    | 20.42556498 |
| TAX1BP3      | NM_014604    | 62.57929669 | 7.325750753 | 0.000420253 | 8.542373171 |
| POLR2A       | NM_000937    | 147.8212804 | 2.106043749 | 1.04E-15    | 70.1890834  |
| POLR2E       | NM_002695    | 30.53150661 | 1.114752356 | 0.003490154 | 27.3886002  |
| DPH1         | NM_001383    | 23.87175015 | 0.324004128 | 0.003724389 | 73.67730244 |
| OXLD1        | NM_001039842 | 48.09264964 | 1.280594774 | 0.0002026   | 37.55493199 |
| C7orf43      | NM_018275    | 68.82205574 | 2.55225216  | 2.19E-06    | 26.96522578 |
| LIPT2        | NM_001144869 | 82.07372059 | 3.015626228 | 3.58E-07    | 27.21614497 |
| KRI1         | NM_023008    | 47.7435003  | 1.906578742 | 0.000104768 | 25.04145213 |
| THUMP3-AS1   | NR_027007    | 75.22642995 | 3.308891329 | 9.92E-07    | 22.73463299 |
| TUFM         | NM_003321    | 36.33134923 | 2.40012766  | 0.003055923 | 15.13725701 |
| FSCN1        | NM_003088    | 133.2408662 | 3.898373854 | 4.97E-12    | 34.17857579 |
| IMPDH2       | NM_000884    | 91.80797304 | 16.04456467 | 6.60E-05    | 5.722060707 |
| EMC10        | NM_206538    | 60.90139806 | 0.315681689 | 2.92E-08    | 192.9202743 |
| KLF2         | NM_016270    | 81.72457126 | 14.52064128 | 0.000286232 | 5.628165428 |
| ZNF696       | NM_030895    | 74.24683001 | 1.708682932 | 1.90E-07    | 43.45266675 |
| BOK          | NM_032515    | 35.9821999  | 0.047245482 | 5.95E-06    | 761.6008584 |
| NEAT1        | NR_028272    | 109.0199667 | 24.30879933 | 0.000104791 | 4.484794384 |
| RSRP1        | NM_020317    | 99.1919472  | 6.039240569 | 3.48E-08    | 16.42457293 |
| RPL23A       | NM_000984    | 74.78351352 | 3.036240574 | 6.72E-07    | 24.63029911 |
| MED29        | NM_017592    | 71.45363529 | 2.039748657 | 8.02E-07    | 35.03060785 |
| PPP1R15A     | NM_014330    | 73.89768067 | 6.580566383 | 4.07E-05    | 11.22968395 |
| MANF         | NM_006010    | 65.21087624 | 1.367472635 | 1.92E-07    | 47.68715261 |
| ESAM         | NM_138961    | 51.61006205 | 0.309548768 | 1.28E-06    | 166.7267565 |
| ASF1B        | NM_018154    | 68.63452156 | 0.271370274 | 9.01E-09    | 252.9183485 |
| C10orf10     | NM_007021    | 59.50480071 | 2.850954683 | 5.04E-05    | 20.87188585 |
| NDUFB7       | NM_004146    | 29.13490926 | 0.73996244  | 0.003718625 | 39.37349748 |
| TAF1D        | NM_024116    | 67.58707355 | 1.665809964 | 3.24E-07    | 40.57309959 |
| CCDC137      | NM_199287    | 72.31354913 | 0.75853713  | 3.17E-09    | 95.33290635 |
| VASN         | NM_138440    | 80.04667263 | 2.678136319 | 2.49E-07    | 29.8889463  |
| ARC          | NM_015193    | 99.98401296 | 2.262998695 | 2.46E-10    | 44.18209042 |



|           |              |             |             |             |             |
|-----------|--------------|-------------|-------------|-------------|-------------|
| RNF223    | NM_001205252 | 39.40584522 | 1.228586331 | 0.000342113 | 32.07413611 |
| LOC646719 | NR_046262    | 70.2186531  | 0.281236921 | 1.25E-09    | 249.6779326 |
| NOP56     | NR_027700    | 77.06594374 | 6.57787554  | 1.59E-05    | 11.71593218 |
| PRDX2     | NM_005809    | 59.24941846 | 2.075213756 | 5.70E-06    | 28.55099542 |
| ADM       | NM_001124    | 76.01849572 | 7.031258586 | 2.32E-05    | 10.81150619 |
| CALR      | NM_004343    | 112.5373791 | 3.898346796 | 5.70E-10    | 28.86797533 |
| SPCS1     | NM_014041    | 38.3583972  | 1.732742221 | 0.001209187 | 22.13739398 |
| PYURF     | NM_032906    | 76.62302731 | 0.661490932 | 1.55E-08    | 115.8338288 |
| H3F3B     | NM_005324    | 143.8609515 | 17.53010666 | 4.50E-08    | 8.206507486 |
| VPS4A     | NM_013245    | 41.68827543 | 0.487177627 | 9.06E-05    | 85.57099731 |
| B4GALT7   | NM_007255    | 55.73200605 | 1.388298718 | 4.34E-06    | 40.14410251 |
| TXNDC17   | NM_032731    | 62.23014735 | 4.464372988 | 9.82E-05    | 13.9392805  |
| TUBB2A    | NM_001069    | 84.35615081 | 5.687579309 | 4.84E-07    | 14.83164387 |
| SAPCD2    | NM_178448    | 68.02998997 | 1.72856539  | 9.92E-07    | 39.35633002 |
| SIX5      | NM_175875    | 33.001471   | 0.373698329 | 0.000280178 | 88.31045909 |
| TOE1      | NM_025077    | 49.67678118 | 3.570410487 | 0.000253776 | 13.91346495 |
| COX6A1    | NM_004373    | 58.3635856  | 0.369936669 | 1.28E-06    | 157.7664246 |
| C19orf24  | NM_017914    | 87.43064679 | 7.493173832 | 1.73E-06    | 11.6680393  |
| ID1I      | NM_004508    | 48.53556607 | 0.527477328 | 8.44E-06    | 92.01450657 |
| HNRNPA0   | NM_006805    | 72.94399974 | 0.476187672 | 2.65E-09    | 153.1833016 |
| RNF123    | NM_022064    | 56.26868957 | 0.89507276  | 1.41E-05    | 62.86493357 |
| PDAP1     | NM_014891    | 42.82949054 | 1.705881917 | 0.000433307 | 25.10694914 |
| RPS8      | NM_001012    | 70.91695178 | 6.634307359 | 5.98E-05    | 10.68942814 |
| KLC3      | NM_177417    | 46.6022852  | 0.09715415  | 2.25E-06    | 479.6736432 |
| INTS6-AS1 | NR_103812    | 63.37136246 | 8.49376277  | 0.002421482 | 7.460929175 |
| TUBG2     | NM_016437    | 61.34431449 | 1.293229761 | 8.96E-07    | 47.43496967 |
| RPL18A    | NM_000980    | 70.91695178 | 5.973702218 | 1.76E-05    | 11.87152442 |
| RPS12     | NM_001016    | 119.3846698 | 5.885125318 | 1.25E-09    | 20.28583307 |
| GFER      | NM_005262    | 51.70382914 | 1.276194678 | 1.35E-05    | 40.51406109 |
| FAM127A   | NM_001078171 | 55.91954023 | 5.60712582  | 0.001617876 | 9.972941936 |
| LINC00896 | NR_026919    | 30.02074211 | 0.974688111 | 0.00339551  | 30.80035733 |
| IMP3      | NM_018285    | 53.1004265  | 5.586377807 | 0.003359071 | 9.505341087 |
| PLK3      | NM_004073    | 78.55630818 | 4.561917884 | 1.62E-06    | 17.22001802 |
| WDR83OS   | NM_016145    | 73.64229842 | 11.81393245 | 0.001007866 | 6.23351274  |
| KAZALD1   | NM_030929    | 58.26981851 | 0.674352272 | 1.19E-06    | 86.4085745  |
| PNRC2     | NM_017761    | 64.25719532 | 0.537698789 | 8.12E-08    | 119.5040729 |
| HINT2     | NM_032593    | 35.09636704 | 0.866520645 | 0.001368939 | 40.50263226 |
| EXOSC6    | NM_058219    | 39.05669588 | 0.867012886 | 0.000442812 | 45.0474226  |

**Sheet3: Pausing genes in HMBA treated HCT116 cells expressing shAFF4**

| Symbol    | Gene ID      | Promoter RPK | Gene Body RPK | pValue      | Pause Ratio(TR) |
|-----------|--------------|--------------|---------------|-------------|-----------------|
| MRPS12    | NM_0211107   | 41.23569155  | 0.385480164   | 6.09E-05    | 106.9722788     |
| NUDT15    | NM_018283    | 53.54951704  | 0.526946546   | 5.49E-07    | 101.6222944     |
| TMEM222   | NM_032125    | 41.16067678  | 1.258391139   | 0.000460807 | 32.70896902     |
| MUTYH     | NM_001293190 | 63.54434729  | 3.326440646   | 1.41E-05    | 19.10280509     |
| RBM10     | NM_001204466 | 61.719157    | 1.282696793   | 3.88E-06    | 48.11671577     |
| PUF60     | NM_078480    | 61.22535205  | 1.459051214   | 1.56E-06    | 41.96244207     |
| FDXR      | NM_024417    | 170.9434405  | 4.190816321   | 7.86E-18    | 40.7900102      |
| ATP5G3    | NM_001689    | 104.4362634  | 2.306282341   | 1.02E-11    | 45.28338164     |
| GUSB      | NM_000181    | 38.84168154  | 0.108516788   | 1.95E-06    | 357.9324666     |
| PDCD6     | NR_073609    | 93.52883803  | 0.941952524   | 2.31E-12    | 99.2925181      |
| GSTT2B    | NM_001080843 | 100.5608385  | 8.365329681   | 2.04E-07    | 12.0211447      |
| GRTP1     | NM_024719    | 48.34270683  | 0.204851945   | 9.08E-07    | 235.9885171     |
| NPM1      | NM_002520    | 67.41977218  | 2.644305356   | 1.10E-06    | 25.49621284     |
| CD320     | NM_016579    | 122.944509   | 6.338855528   | 2.59E-10    | 19.39537958     |
| PIEZO1    | NM_001142864 | 46.44250177  | 0.840042678   | 3.61E-05    | 55.28588368     |
| PLSCR3    | NM_020360    | 116.8251037  | 6.24469326    | 4.93E-10    | 18.70790106     |
| PRKAG1    | NM_002733    | 106.3364685  | 1.375090821   | 1.59E-12    | 77.33050564     |
| PHF7      | NM_016483    | 75.51439737  | 0.224758434   | 9.03E-11    | 335.9802608     |
| FIS1      | NM_016068    | 59.74393718  | 1.840428481   | 2.64E-06    | 32.46197165     |
| MMP24-AS1 | NR_102706    | 99.22945321  | 13.55563043   | 8.04E-06    | 7.320165134     |
| SERTAD1   | NM_013376    | 122.4507041  | 11.14434436   | 1.49E-08    | 10.98769925     |
| ANAPC11   | NM_016476    | 52.06810217  | 6.046563175   | 0.001310752 | 8.611189641     |
| TOMM34    | NM_006809    | 80.64619281  | 0.658629732   | 7.69E-10    | 122.4454179     |
| POMT1     | NM_007171    | 47.0113215   | 0.603414526   | 5.12E-06    | 77.90883287     |
| TPM4      | NM_001145160 | 32.22847122  | 0.683302398   | 0.000857294 | 47.16575166     |
| RPAIN     | NR_027685    | 37.92908639  | 2.20796872    | 0.001517189 | 17.17827162     |
| ATP5G2    | NM_005176    | 30.32826616  | 1.572988238   | 0.004454733 | 19.28066938     |
| NR1H3     | NM_001251934 | 34.62248123  | 2.694912997   | 0.004272813 | 12.84734657     |
| ACAD9     | NR_033426    | 19.76461619  | 0.055401491   | 0.004454733 | 356.7524267     |
| RFXANK    | NM_001278727 | 97.25423338  | 2.253805491   | 2.07E-10    | 43.15112097     |
| KDELR3    | NM_016657    | 38.42289135  | 3.424039645   | 0.002010002 | 11.2215089      |
| LOC644656 | NR_036539    | 78.74598776  | 7.015297417   | 5.99E-05    | 11.22489655     |
| CENPBD1P1 | NR_026052    | 46.86129196  | 2.668748734   | 0.000647335 | 17.55927464     |
| TMEM9B    | NM_001286095 | 70.23257238  | 0.678678256   | 1.34E-08    | 103.4843415     |
| ZNF101    | NM_033204    | 57.84373212  | 0.536988681   | 5.74E-07    | 107.7187176     |
| CISH      | NM_013324    | 59.32514699  | 0.936362987   | 5.49E-07    | 63.356997       |
| NUDT1     | NM_198949    | 73.12038735  | 3.650870157   | 5.30E-07    | 20.02820813     |
| DDX12P    | NR_033399    | 45.03610167  | 0.030654517   | 8.39E-08    | 1469.15057      |
| ZNF324    | NM_014347    | 55.03093192  | 3.709983509   | 6.88E-05    | 14.83320122     |
| DAG1      | NM_004393    | 88.32202782  | 0.42323628    | 4.90E-11    | 208.6825541     |
| SLC37A4   | NM_001164278 | 45.03610167  | 1.796346463   | 4.42E-05    | 25.07094405     |
| LOC554206 | NR_038379    | 51.72432676  | 2.169893346   | 0.000564964 | 23.83726687     |
| PLAUR     | NM_001005377 | 60.73154709  | 0.91716098    | 1.73E-06    | 66.21688933     |
| NQO2      | NM_001290222 | 135.8271543  | 1.620090454   | 3.87E-16    | 83.83924115     |
| SLC35A2   | NM_001282647 | 45.60492139  | 2.568870365   | 0.000615114 | 17.75290883     |
| CYHR1     | NM_032687    | 97.25423338  | 20.78753247   | 0.000427654 | 4.678488586     |
| ENOSF1    | NM_001126123 | 57.00615174  | 0.79930441    | 9.06E-07    | 71.31970128     |
| SRSF1     | NR_034041    | 90.98479848  | 1.199728608   | 2.13E-11    | 75.8378169      |
| RANBP3    | NM_003624    | 40.24808164  | 0.287126243   | 5.56E-05    | 140.1755591     |
| MATN1-AS1 | NR_034182    | 72.6265824   | 2.597679239   | 4.30E-07    | 27.95825648     |
| GLTSCR2   | NM_015710    | 93.03503308  | 1.322765726   | 1.38E-11    | 70.33371914     |
| TPD52L2   | NR_045090    | 98.73564825  | 1.500135124   | 7.67E-11    | 65.81783643     |
| EIF3D     | NM_003753    | 74.0329825   | 1.575453283   | 5.65E-08    | 46.99154416     |
| CLASRP    | NM_007056    | 81.13999777  | 2.03231208    | 6.53E-08    | 39.92496947     |
| TMC4      | NM_001145303 | 60.73154709  | 5.163398423   | 5.90E-05    | 11.76193315     |
| PSMC3IP   | NM_001256016 | 63.54434729  | 2.862359522   | 2.73E-06    | 22.19998809     |
| TRMT10B   | NM_001286953 | 62.13794719  | 0.895796116   | 9.01E-07    | 69.36617169     |
| LSM4      | NM_001252129 | 67.83856237  | 3.445272779   | 6.51E-06    | 19.69033128     |
| MON1B     | NM_014940    | 43.13589661  | 0.378245499   | 1.29E-05    | 114.0420618     |
| PPCDC     | NR_125369    | 85.43421284  | 0.655555917   | 4.50E-10    | 130.3233037     |
| UBA52     | NM_001033930 | 104.9300684  | 11.86466181   | 3.89E-07    | 8.843915662     |
| SEC16A    | NM_014866    | 80.72120758  | 0.448319204   | 2.20E-10    | 180.0529775     |
| TK1       | NM_003258    | 77.83339261  | 13.02439434   | 0.000152296 | 5.97597021      |

|              |              |             |             |             |             |
|--------------|--------------|-------------|-------------|-------------|-------------|
| MYEOV        | NM_001300923 | 64.53195721 | 9.245461256 | 0.000243001 | 6.979852645 |
| DDTL         | NM_001084393 | 96.83544319 | 17.28641747 | 4.24E-05    | 5.601822549 |
| MIEF1        | NM_019008    | 26.52785604 | 0.506521245 | 0.001954384 | 52.37264244 |
| ZDHHC4       | NM_018106    | 131.5329392 | 0.834816219 | 3.10E-17    | 157.5591565 |
| C6orf203     | NM_001142470 | 97.82305311 | 0.339881285 | 4.11E-13    | 287.8153563 |
| ADCK4        | NM_024876    | 56.8561222  | 0.640789079 | 2.28E-07    | 88.72829469 |
| TM7SF2       | NR_102367    | 165.3178401 | 17.17165522 | 6.24E-11    | 9.627367773 |
| LRRC8E       | NM_001268285 | 82.12760769 | 2.926408512 | 8.57E-08    | 28.06430044 |
| SLX1A        | NM_001015000 | 242.8511736 | 58.61613708 | 6.61E-09    | 4.143077072 |
| NELFA        | NM_005663    | 75.4393826  | 8.972872817 | 2.73E-05    | 8.407494917 |
| GUCD1        | NM_001284252 | 100.5608385 | 3.244347717 | 1.45E-09    | 30.99570308 |
| LRRC75A-AS1  | NR_027162    | 97.32924815 | 16.44994338 | 3.47E-05    | 5.916691985 |
| RNF32        | NM_001184996 | 61.22535205 | 0.61989001  | 1.84E-07    | 98.76808966 |
| ZSCAN16-AS1  | NR_103456    | 23.22125088 | 0.068265867 | 0.00090997  | 340.1590263 |
| TM9SF1       | NM_001014842 | 48.34270683 | 0.218036086 | 3.32E-07    | 221.7188343 |
| SBDSP1       | NR_024111    | 68.75115751 | 0.662034568 | 2.99E-09    | 103.8482895 |
| HNRNPA1P10   | NR_002944    | 132.4455343 | 9.159352052 | 3.70E-10    | 14.46014233 |
| HCP5         | NR_040662    | 69.31997724 | 1.568770568 | 2.66E-07    | 44.18745395 |
| CYB561A3     | NM_001161454 | 49.33031674 | 5.427263736 | 0.000832801 | 9.089353151 |
| NR4A1        | NM_002135    | 120.6255138 | 3.412917171 | 3.89E-12    | 35.34381521 |
| ITM2C        | NM_001012514 | 48.83651178 | 0.147668054 | 6.69E-08    | 330.7181914 |
| SRSF10       | NM_001300936 | 111.0494737 | 1.270667635 | 1.62E-13    | 87.39458745 |
| PPP1R3F      | NM_033215    | 32.30348599 | 0.66305749  | 0.000474605 | 48.71898208 |
| HES6         | NM_018645    | 114.9248986 | 17.66768489 | 4.36E-06    | 6.504808034 |
| HARS         | NM_001289093 | 75.4393826  | 2.751923805 | 1.74E-07    | 27.41332535 |
| USH1G        | NM_173477    | 46.02371158 | 0.254622291 | 2.42E-06    | 180.752877  |
| LOC100287015 | NR_040040    | 108.7304785 | 1.458754024 | 2.12E-12    | 74.53654057 |
| ANAPC15      | NM_001278491 | 55.94352706 | 5.870858412 | 0.000234234 | 9.529019972 |
| FANCA        | NM_001286167 | 39.75427668 | 0.941476504 | 0.000179008 | 42.22545813 |
| NUDT22       | NM_001128613 | 82.54639787 | 4.553432779 | 2.33E-07    | 18.12838838 |
| LOC101928736 | NR_110941    | 69.24496247 | 2.112735355 | 5.98E-07    | 32.77502897 |
| CCT6A        | NM_001009186 | 71.63897248 | 2.09733415  | 9.77E-08    | 34.15715731 |
| PGAP2        | NR_027017    | 67.41977218 | 1.431375842 | 5.74E-07    | 47.1013763  |
| NCBP2        | NM_007362    | 50.24291189 | 4.620239629 | 0.000222083 | 10.87452511 |
| ABHD11       | NM_148912    | 77.83339261 | 4.256150647 | 1.43E-06    | 18.28727389 |
| ZBTB24       | NM_001164313 | 63.1255571  | 4.778238047 | 7.27E-05    | 13.21105321 |
| C21orf33     | NM_198155    | 78.82100253 | 5.525178508 | 2.47E-06    | 14.26578389 |
| PPIA         | NM_021130    | 133.9269492 | 8.645916692 | 4.29E-11    | 15.49019658 |
| CHCHD2       | NM_016139    | 105.4238733 | 0.240023314 | 3.91E-15    | 439.2234716 |
| SON          | NM_032195    | 59.74393718 | 0.155151861 | 1.50E-09    | 385.067486  |
| KLHL21       | NM_014851    | 139.1337594 | 3.383640549 | 6.52E-14    | 41.11954488 |
| AP2M1        | NM_001025205 | 91.62863298 | 4.642296364 | 6.29E-08    | 19.73778186 |
| ZFYVE19      | NM_001077268 | 57.91874689 | 0.740896246 | 1.97E-07    | 78.17389707 |
| TCEB3-AS1    | NR_038280    | 74.52678745 | 1.838237851 | 7.68E-08    | 40.54251598 |
| PIK3R2       | NM_005027    | 52.71193667 | 1.17024824  | 2.09E-05    | 45.04338043 |
| DNAJC19      | NR_046073    | 79.23979271 | 2.052231362 | 7.04E-09    | 38.61152996 |
| SLC25A10     | NM_001270888 | 78.32719757 | 5.019655384 | 2.50E-06    | 15.6040986  |
| BAIAP3       | NM_001199099 | 96.76042842 | 4.259712837 | 6.57E-09    | 22.71524681 |
| R3HCC1       | NM_001136108 | 33.14106636 | 1.732968453 | 0.001747412 | 19.1238717  |
| DEDD2        | NR_073050    | 35.04127142 | 0.630417361 | 0.00019692  | 55.58424245 |
| DONSON       | NM_017613    | 85.50922761 | 2.462633325 | 1.45E-08    | 34.72267947 |
| SLC26A6      | NM_001281732 | 82.12760769 | 2.553428153 | 2.41E-08    | 32.16366499 |
| C8orf58      | NM_001013842 | 45.60492139 | 3.235760681 | 0.000347515 | 14.09403411 |
| AURKAIP1     | NM_001127229 | 79.6585829  | 9.573674716 | 8.75E-05    | 8.320585905 |
| RPL13A       | NM_012423    | 130.5453293 | 26.30834136 | 3.51E-06    | 4.962126935 |
| MLXIPL       | NM_032952    | 157.1482001 | 2.421681825 | 7.78E-17    | 64.89217473 |
| TMEM25       | NM_001144037 | 25.54024613 | 0.260766588 | 0.001006368 | 97.94293935 |
| HNRNPA2B1    | NM_031243    | 158.0607952 | 3.537631704 | 2.37E-16    | 44.67983342 |
| C1QTNF9B-AS1 | NM_001014442 | 52.21813171 | 2.758310862 | 0.000118106 | 18.93119896 |
| STIP1        | NM_001282652 | 132.3705196 | 4.548283608 | 1.85E-12    | 29.10340053 |
| NFE2L2       | NM_006164    | 46.93630673 | 0.357413433 | 5.12E-06    | 131.3221674 |
| CSRNP2       | NM_030809    | 112.0370837 | 1.708353219 | 2.49E-12    | 65.5819197  |
| YWHAZ        | NM_001135699 | 48.83651178 | 2.315849147 | 0.000185563 | 21.08795033 |
| TSPAN10      | NM_001290212 | 48.4177216  | 0.763798919 | 1.24E-05    | 63.39066525 |
| INSIG1       | NM_005542    | 68.82617228 | 0.813804518 | 2.11E-08    | 84.57334749 |

|               |              |             |             |             |              |
|---------------|--------------|-------------|-------------|-------------|--------------|
| TMEM143       | NM_018273    | 25.12145594 | 0.355823557 | 0.002533392 | 70.6008792   |
| FOS           | NM_005252    | 144.7593598 | 16.93969745 | 2.52E-09    | 8.545569382  |
| CPNE1         | NM_152925    | 87.82822286 | 0.044682922 | 5.80E-15    | 1965.588156  |
| CDK11B        | NM_033486    | 32.22847122 | 0.727056978 | 0.001396235 | 44.32729785  |
| DUS3L         | NM_001161619 | 41.23569155 | 0.72621886  | 5.66E-05    | 56.78135589  |
| TMEM106A      | NM_001291586 | 37.01649125 | 1.704330638 | 0.000718549 | 21.71907869  |
| LINC00173     | NR_027345    | 57.00615174 | 3.364901051 | 4.86E-05    | 16.94140508  |
| ZNF7          | NM_001282797 | 67.83856237 | 1.592077783 | 2.27E-07    | 42.61008042  |
| TAF9B         | NM_015975    | 41.31070632 | 0.54023241  | 7.93E-05    | 76.4683969   |
| RPS10         | NM_001203245 | 73.95796773 | 2.774592901 | 2.64E-07    | 26.65543032  |
| RHOD          | NM_014578    | 57.91874689 | 0.318924288 | 1.97E-07    | 181.6065725  |
| PFKP          | NM_002627    | 76.42699251 | 0.810995484 | 8.17E-09    | 94.23849336  |
| CBR3-AS1      | NR_038892    | 84.02781274 | 0.629302309 | 6.24E-10    | 133.5253527  |
| SLC29A1       | NM_001078174 | 36.1038961  | 2.372861149 | 0.001696594 | 15.21534293  |
| PIP4K2B       | NM_003559    | 52.21813171 | 1.675467775 | 7.41E-05    | 31.16630023  |
| RTBDN         | NM_031429    | 50.24291189 | 4.530063537 | 0.000305288 | 11.09099497  |
| CHTOP         | NM_001206612 | 49.8241217  | 0.097334548 | 3.32E-07    | 511.8852711  |
| ZBTB4         | NM_020899    | 29.8344612  | 0.289489688 | 0.00067614  | 103.0588045  |
| SRA1          | NR_045587    | 113.9372887 | 6.869962205 | 1.22E-09    | 16.58484942  |
| C17orf62      | NM_001193654 | 43.47967203 | 3.179696741 | 0.001435711 | 13.67415687  |
| DUSP18        | NM_152511    | 49.25530197 | 2.693443553 | 0.000174645 | 18.28711128  |
| RER1          | NM_007033    | 66.43216226 | 2.050452734 | 6.02E-07    | 32.39877768  |
| ENDOV         | NM_173627    | 58.2625223  | 2.514671463 | 1.78E-05    | 23.16903944  |
| TMEM11        | NM_003876    | 35.95386656 | 0.91604274  | 0.000835115 | 39.24911468  |
| INF2          | NM_032714    | 45.11111644 | 0.28685503  | 6.63E-07    | 157.2610264  |
| SPDYC         | NM_001008778 | 61.22535205 | 3.826286921 | 5.69E-05    | 16.00124437  |
| SNHG17        | NR_027241    | 87.3344179  | 2.408934978 | 1.33E-08    | 36.25436913  |
| DNAJA3        | NM_001135110 | 93.45382326 | 0.728025108 | 5.93E-11    | 128.3662091  |
| ADAT3         | NM_138422    | 52.6369219  | 1.46204797  | 7.31E-06    | 36.00218527  |
| ZNF276        | NR_110129    | 52.6369219  | 8.705512065 | 0.002240418 | 6.046390093  |
| GSTZ1         | NM_001513    | 32.22847122 | 1.839549445 | 0.004647094 | 17.5197635   |
| ILF3          | NM_012218    | 76.92079747 | 0.599427135 | 9.72E-10    | 128.3238494  |
| ZNF408        | NM_024741    | 186.1450809 | 0.944748021 | 7.84E-25    | 197.031459   |
| PSMA3         | NM_002788    | 57.84373212 | 0.95692621  | 6.37E-06    | 60.4474321   |
| SPATA33       | NR_073515    | 59.74393718 | 2.332758974 | 3.41E-06    | 25.61084871  |
| ARF6          | NM_001663    | 86.84061295 | 1.090348608 | 2.11E-10    | 79.64481482  |
| GIPC1         | NM_202470    | 41.72949651 | 1.920823311 | 0.000412776 | 21.724797    |
| GTPBP3        | NM_032620    | 68.75115751 | 5.154575474 | 8.12E-06    | 13.33788939  |
| HN1L          | NM_144570    | 33.63487132 | 0.373570177 | 0.000139487 | 90.03628614  |
| COX5B         | NM_001862    | 102.6110731 | 2.355740545 | 8.20E-11    | 43.55788389  |
| NDUFC2        | NM_001204055 | 40.32309641 | 0.751860327 | 0.000191558 | 53.63110002  |
| MEF2BNB-MEF2B | NR_027307    | 47.84890187 | 2.718134103 | 0.000232201 | 17.60358395  |
| GTF3C5        | NM_001286709 | 99.15443844 | 0.92696668  | 1.85E-11    | 106.9665615  |
| MRPL55        | NM_181441    | 31.73466626 | 1.905469797 | 0.004895542 | 16.65451024  |
| LINC01315     | NR_120595    | 58.33753707 | 2.60071892  | 9.53E-06    | 22.443131183 |
| FLVCR1-AS1    | NR_027286    | 62.63175215 | 1.671820396 | 3.83E-06    | 37.46320616  |
| MAGEF1        | NM_022149    | 76.8457827  | 7.128747797 | 1.76E-05    | 10.77970281  |
| ZNF655        | NM_024061    | 49.8241217  | 3.967389043 | 0.000325764 | 12.55841591  |
| TMEM147       | NM_032635    | 53.13072686 | 3.034850075 | 8.30E-05    | 17.50687037  |
| VDAC2         | NR_033675    | 61.719157   | 2.04323963  | 2.82E-06    | 30.20651914  |
| GPATCH3       | NM_022078    | 49.25530197 | 0.080876924 | 3.32E-07    | 609.0155229  |
| AP2S1         | NM_021575    | 48.83651178 | 7.689789393 | 0.003318668 | 6.350825659  |
| LINC00339     | NR_023919    | 40.66687183 | 2.99501231  | 0.001920241 | 13.57819856  |
| SNAPC2        | NM_003083    | 65.02576216 | 7.975872557 | 0.000172435 | 8.152808573  |
| EIF1          | NM_005801    | 157.9857805 | 20.02074242 | 3.83E-09    | 7.891104993  |
| KRT8          | NM_001256293 | 50.16789712 | 3.510628459 | 0.000140199 | 14.29028953  |
| FGFR4         | NM_001291980 | 99.22945321 | 0.596484513 | 8.34E-14    | 166.3571325  |
| HJURP         | NM_001282962 | 71.63897248 | 0.600826229 | 1.05E-08    | 119.2340963  |
| TMEM175       | NM_032326    | 33.55985655 | 0.239760904 | 8.06E-05    | 139.9721804  |
| LRCH4         | NM_002319    | 114.4310937 | 1.48076985  | 4.48E-13    | 77.27810884  |
| FADS1         | NM_013402    | 43.70471634 | 5.022258451 | 0.003110299 | 8.702203752  |
| C1orf85       | NM_144580    | 37.43528144 | 1.517319603 | 0.000809655 | 24.67198167  |
| PRMT1         | NM_198318    | 48.83651178 | 1.020657635 | 1.79E-05    | 47.84808352  |
| EML3          | NM_001300794 | 31.80968103 | 1.216208275 | 0.003362431 | 26.1547974   |
| SF3A1         | NM_001005409 | 95.84783328 | 0.546482186 | 3.04E-12    | 175.3905905  |

|              |              |             |             |             |             |
|--------------|--------------|-------------|-------------|-------------|-------------|
| CYCS         | NM_018947    | 49.33031674 | 1.497277649 | 1.51E-05    | 32.94667275 |
| ELMO3        | NM_024712    | 41.65448174 | 2.170128903 | 0.000490001 | 19.19447351 |
| GGA1         | NM_013365    | 31.31587607 | 0.6161583   | 0.000590101 | 50.82440028 |
| TPM3         | NM_001278189 | 83.53400779 | 0.35761183  | 8.85E-12    | 233.5884913 |
| CAPN10-AS1   | NR_103792    | 47.84890187 | 3.328486426 | 0.000451646 | 14.37557368 |
| UNC45A       | NM_001039675 | 85.43421284 | 6.445906561 | 1.88E-06    | 13.25402595 |
| TMEM177      | NM_001105199 | 84.02781274 | 3.508129134 | 4.05E-08    | 23.95231462 |
| SLC44A2      | NM_020428    | 64.03815225 | 0.92328671  | 5.28E-07    | 69.35890182 |
| MRPL49       | NR_037568    | 75.4393826  | 9.159012692 | 7.45E-05    | 8.23662824  |
| LAMTOR2      | NM_001145264 | 33.63487132 | 2.700751228 | 0.004884681 | 12.45389467 |
| NDRG4        | NM_001242836 | 74.94557764 | 11.04925554 | 7.74E-05    | 6.782862191 |
| FAM3A        | NM_001171134 | 53.13072686 | 1.959917324 | 8.40E-06    | 27.10865719 |
| CARHSP1      | NM_001278260 | 138.6399545 | 6.77073759  | 3.21E-12    | 20.47634436 |
| HM13         | NM_178580    | 76.8457827  | 1.246025097 | 1.46E-07    | 61.67274069 |
| C14orf2      | NM_004894    | 91.13482802 | 0.532915608 | 5.93E-13    | 171.0117451 |
| BAMBI        | NM_012342    | 112.5308886 | 2.878840776 | 4.02E-12    | 39.08895885 |
| CRELD1       | NM_015513    | 58.2625223  | 2.595661845 | 7.55E-06    | 22.44611424 |
| TYSND1       | NM_001040273 | 46.44250177 | 4.92763589  | 0.001116774 | 9.424905331 |
| STK16        | NR_026909    | 96.83544319 | 9.803527046 | 1.30E-06    | 9.877612694 |
| MED15        | NM_001293234 | 44.54229671 | 0.04630258  | 6.63E-07    | 961.9830316 |
| C9orf16      | NM_024112    | 102.0422534 | 6.869145387 | 4.56E-08    | 14.85515994 |
| FAM136A      | NM_032822    | 50.24291189 | 0.131363432 | 1.07E-07    | 382.4725894 |
| KIAA1191     | NR_109798    | 131.9517294 | 0.82432437  | 1.63E-17    | 160.0725809 |
| SLC2A8       | NM_014580    | 63.1255571  | 0.194634008 | 3.22E-09    | 324.3295341 |
| RFC2         | NM_181471    | 60.73154709 | 0.228847744 | 4.95E-09    | 265.3797064 |
| EEF1D        | NM_001130057 | 92.39119858 | 8.373792838 | 2.23E-06    | 11.03337524 |
| TOR1B        | NM_014506    | 137.7273593 | 2.804811057 | 6.36E-15    | 49.10397047 |
| CATIP-AS1    | NR_110573    | 66.43216226 | 7.354707039 | 0.000536416 | 9.032604822 |
| MEPCE        | NM_001194991 | 161.4424152 | 22.40994954 | 2.15E-09    | 7.204050812 |
| ITPA         | NM_033453    | 26.03405109 | 0.189206658 | 0.000761071 | 137.5958511 |
| TSPYL4       | NM_021648    | 45.03610167 | 6.09252443  | 0.002373679 | 7.392026439 |
| SEC13        | NM_001278946 | 72.13277744 | 5.678098023 | 1.41E-05    | 12.70368654 |
| ADAM15       | NR_048577    | 91.62863298 | 0.698060364 | 3.23E-12    | 131.2617615 |
| SLC38A3      | NM_006841    | 39.82929145 | 0.114113734 | 1.95E-06    | 349.031533  |
| RPL17        | NM_001199345 | 74.0329825  | 3.966132097 | 5.08E-07    | 18.66629267 |
| AVPI1        | NM_021732    | 110.5556688 | 3.565676933 | 1.27E-10    | 31.00552037 |
| MAP3K11      | NM_002419    | 47.84890187 | 0.353537026 | 5.20E-07    | 135.3433966 |
| NTMT1        | NM_001286798 | 119.9816793 | 3.383770626 | 9.34E-12    | 35.4579824  |
| ITGA3        | NM_002204    | 65.86334254 | 2.851612368 | 3.68E-06    | 23.09687785 |
| NOLC1        | NM_001284389 | 37.36026667 | 2.826478983 | 0.001625779 | 13.21795311 |
| PRR14        | NM_024031    | 46.44250177 | 5.213403032 | 0.002754025 | 8.908289169 |
| FAM109A      | NM_144671    | 37.92908639 | 0.528584022 | 0.000153702 | 71.75602141 |
| FAM134A      | NM_024293    | 19.42084077 | 0.196190176 | 0.002846449 | 98.98987371 |
| SF3B6        | NM_016047    | 58.33753707 | 0.55101697  | 1.97E-07    | 105.8724871 |
| STX1A        | NM_004603    | 56.51234679 | 3.35921054  | 0.000117861 | 16.82310356 |
| LONP1        | NM_004793    | 49.33031674 | 9.489465752 | 0.004297423 | 5.198429293 |
| NDUFB8       | NM_001284368 | 59.25013222 | 2.016613196 | 3.95E-06    | 29.38100988 |
| LOC100289561 | NM_001242713 | 57.34992716 | 0.360057897 | 2.97E-07    | 159.279737  |
| PSMD8        | NM_002812    | 55.03093192 | 3.763073524 | 0.000116565 | 14.62393216 |
| ZNF771       | NM_016643    | 65.51956712 | 6.308860123 | 7.21E-05    | 10.38532569 |
| KHNYN        | NM_001290257 | 63.54434729 | 4.596680478 | 2.27E-05    | 13.8239644  |
| DCLRE1B      | NM_022836    | 34.05366151 | 0.807547056 | 0.00081299  | 42.1692597  |
| CCT3         | NM_001008800 | 32.15345645 | 0.694569354 | 0.000754357 | 46.29265063 |
| MBD1         | NM_001204141 | 30.25325139 | 0.876166705 | 0.003598386 | 34.52910414 |
| TOR2A        | NM_001252018 | 54.61214173 | 3.250253313 | 8.96E-05    | 16.80242629 |
| ZBTB48       | NM_005341    | 86.84061295 | 7.757949465 | 3.11E-06    | 11.19375852 |
| ALDH4A1      | NM_170726    | 29.34065625 | 0.159906175 | 0.000468867 | 183.4866993 |
| MYADM        | NM_001290191 | 60.73154709 | 1.853881309 | 9.41E-07    | 32.75913447 |
| THEMIS2      | NM_001105556 | 90.64102306 | 1.535769819 | 1.25E-10    | 59.0199273  |
| MORN1        | NM_001301060 | 23.64004107 | 0.057948583 | 0.001525429 | 407.9485645 |
| RABAC1       | NM_006423    | 59.32514699 | 9.620549243 | 0.002100936 | 6.166503127 |
| PQLC3        | NM_152391    | 89.72842792 | 1.129317809 | 6.29E-10    | 79.45365528 |
| PPCS         | NM_001287509 | 84.5216177  | 0.156824438 | 1.25E-12    | 538.9569297 |
| ARFIP2       | NM_001242856 | 63.61936206 | 7.821081331 | 0.000348872 | 8.134343497 |
| CALM3        | NM_005184    | 72.13277744 | 3.740507108 | 1.44E-06    | 19.28422413 |

|             |              |             |             |             |             |
|-------------|--------------|-------------|-------------|-------------|-------------|
| CYP2S1      | NM_030622    | 36.86646171 | 1.445904927 | 0.001111374 | 25.49715478 |
| ELP6        | NM_001031703 | 40.32309641 | 0.176918061 | 3.51E-06    | 227.9196158 |
| RPL21       | NM_000982    | 65.51956712 | 1.314029534 | 1.16E-07    | 49.86156355 |
| G6PC3       | NR_028581    | 44.12350652 | 4.741872042 | 0.001435711 | 9.305081649 |
| CENPA       | NM_001042426 | 62.63175215 | 1.35331132  | 1.86E-07    | 46.28037262 |
| SIGMAR1     | NM_001282207 | 133.3581295 | 6.020947849 | 5.41E-12    | 22.14902584 |
| RPL6        | NM_001024662 | 107.2490636 | 0.9791728   | 4.47E-14    | 109.5302725 |
| RNF167      | NM_015528    | 52.6369219  | 9.402439647 | 0.003435344 | 5.598219598 |
| MRPL18      | NM_014161    | 45.52990662 | 0.802173619 | 1.53E-05    | 56.75816997 |
| DCXR        | NM_016286    | 190.3642812 | 19.29564871 | 1.28E-11    | 9.865658527 |
| RPP14       | NR_049758    | 61.22535205 | 0.27490271  | 4.19E-08    | 222.716437  |
| LINC00115   | NR_024321    | 92.54122812 | 7.63338501  | 5.09E-06    | 12.12322292 |
| RPL8        | NM_033301    | 103.7924289 | 6.129493748 | 3.12E-08    | 16.93327919 |
| MRPL40      | NM_003776    | 121.044304  | 3.779540369 | 3.61E-12    | 32.02619688 |
| GRB7        | NM_005310    | 40.32309641 | 2.891102326 | 0.000666492 | 13.94730863 |
| BSC12       | NM_001130702 | 118.7253087 | 2.64060803  | 3.21E-12    | 44.9613526  |
| SMPD1       | NM_001007593 | 52.71193667 | 0.978959803 | 6.67E-06    | 53.84484279 |
| EIF6        | NM_001267810 | 74.52678745 | 2.578750905 | 7.13E-08    | 28.90034369 |
| LINC01123   | NR_046110    | 106.3364685 | 3.749240623 | 4.13E-10    | 28.36213495 |
| SNX21       | NM_152897    | 42.1482867  | 1.287176624 | 0.000120789 | 32.74475773 |
| SDC1        | NM_002997    | 47.0113215  | 0.280855336 | 1.91E-06    | 167.3862499 |
| GCDH        | NM_013976    | 44.04849175 | 0.916951918 | 6.45E-05    | 48.03795151 |
| EXOSC5      | NM_020158    | 36.02888133 | 1.141795133 | 0.000655852 | 31.55459353 |
| ARRB2       | NM_001257331 | 23.71505584 | 0.194939251 | 0.001525429 | 121.65357   |
| FLAD1       | NM_025207    | 62.63175215 | 2.815981486 | 8.87E-06    | 22.24153548 |
| POLL        | NM_013274    | 26.45284127 | 0.458334805 | 0.001006368 | 57.7151047  |
| TRAPPC1     | NM_021210    | 60.23774213 | 3.754712565 | 0.000174273 | 16.04323662 |
| DANCR       | NR_024031    | 90.56600829 | 21.92319667 | 0.001474413 | 4.131058515 |
| SNX5        | NM_152227    | 41.16067678 | 0.41050625  | 2.84E-05    | 100.2680879 |
| NDUFC1      | NM_002494    | 43.06088184 | 1.838431404 | 0.000236986 | 23.42262091 |
| C2orf68     | NM_001013649 | 85.43421284 | 5.468492072 | 1.93E-07    | 15.6229929  |
| ILK         | NM_004517    | 62.63175215 | 6.073849885 | 7.95E-05    | 10.31170564 |
| TECR        | NM_138501    | 178.9630509 | 0.131572437 | 8.71E-29    | 1360.186489 |
| MBD4        | NM_003925    | 36.44767152 | 1.561157755 | 0.000779283 | 23.34656533 |
| MAP2K7      | NM_001297556 | 32.72227618 | 1.100695448 | 0.003110618 | 29.72872853 |
| ATXN7L3B    | NM_001136262 | 85.50922761 | 1.692722342 | 7.33E-10    | 50.51580255 |
| TMEM138     | NM_016464    | 65.02576216 | 1.57837031  | 5.53E-07    | 41.19803937 |
| NKIRAS2     | NM_001144928 | 68.33236732 | 3.351143763 | 4.04E-06    | 20.39075974 |
| DUOX1       | NM_017434    | 32.64726141 | 0.954414976 | 0.001067169 | 34.20656865 |
| LEPRE1      | NM_022356    | 94.44143318 | 0.747069596 | 1.38E-11    | 126.4158436 |
| HTRA2       | NM_013247    | 74.87056287 | 6.218366658 | 7.00E-06    | 12.04022969 |
| DDIT3       | NM_001195055 | 157.6420051 | 21.44330212 | 7.20E-09    | 7.351573193 |
| TIMELESS    | NM_003920    | 93.37880849 | 0.323980925 | 2.20E-13    | 288.2231682 |
| MAP3K6      | NM_001297609 | 33.63487132 | 2.804644224 | 0.003302166 | 11.99256256 |
| RPL7A       | NM_000972    | 88.740818   | 10.52908212 | 1.39E-05    | 8.42816278  |
| DRG2        | NM_001388    | 87.25940313 | 0.289107118 | 3.23E-12    | 301.82378   |
| ARF1        | NM_001024226 | 53.54951704 | 3.535207981 | 0.00019692  | 15.14748703 |
| FBXL18      | NM_024963    | 40.66687183 | 0.123227641 | 8.03E-06    | 330.0142036 |
| ARL2        | NM_001667    | 46.02371158 | 1.291466731 | 3.75E-05    | 35.63677677 |
| KAT8        | NM_032188    | 70.72637734 | 1.636436663 | 7.27E-08    | 43.21974626 |
| TM4SF19-AS1 | NR_121665    | 70.5763478  | 0.209608688 | 3.49E-10    | 336.70526   |
| CXorf38     | NM_144970    | 29.41567102 | 0.367952388 | 0.00067614  | 79.94423176 |
| TSPAN4      | NM_001025239 | 37.51029621 | 3.812117308 | 0.002664429 | 9.839753916 |
| CDPF1       | NM_207327    | 80.64619281 | 2.048777673 | 7.04E-09    | 39.36307677 |
| CLK2        | NM_003993    | 71.71398725 | 2.897407005 | 1.06E-06    | 24.75109197 |
| C1orf216    | NM_152374    | 63.1255571  | 6.273858354 | 5.23E-05    | 10.06168032 |
| AARS        | NM_001605    | 121.5381089 | 0.562095638 | 4.41E-15    | 216.2231847 |
| VDAC1       | NM_003374    | 90.22223287 | 0.486953182 | 4.58E-11    | 185.2790704 |
| GCAT        | NM_014291    | 72.6265824  | 11.76957954 | 0.000330125 | 6.170703224 |
| FLYWCH2     | NM_001142499 | 72.13277744 | 0.139903175 | 1.11E-10    | 515.5907115 |
| ULK1        | NM_003565    | 36.1038961  | 1.355894542 | 0.001823772 | 26.62736295 |
| B9D2        | NM_030578    | 45.94869681 | 1.123475644 | 4.42E-05    | 40.8987031  |
| UBE2B       | NM_003337    | 37.92908639 | 1.046570127 | 0.001210908 | 36.24132337 |
| GPATCH4     | NM_015590    | 62.63175215 | 2.259919472 | 3.13E-06    | 27.71415218 |
| NME1-NME2   | NR_037149    | 125.2635043 | 4.54416793  | 6.54E-12    | 27.56577358 |

|             |              |             |             |             |             |
|-------------|--------------|-------------|-------------|-------------|-------------|
| PSMB6       | NM_002798    | 58.33753707 | 7.029649311 | 0.000742688 | 8.298783409 |
| LOC652276   | NR_015441    | 121.044304  | 1.536221862 | 2.70E-13    | 78.79350435 |
| ATP1A1-AS1  | NR_024125    | 42.22330147 | 2.135167597 | 0.000348152 | 19.77516966 |
| NKX3-1      | NM_006167    | 86.84061295 | 1.1881602   | 4.11E-10    | 73.08830318 |
| SRSF3       | NM_003017    | 172.4248553 | 3.2218745   | 9.84E-19    | 53.51693721 |
| SNRPD3      | NM_004175    | 106.2614537 | 1.404405578 | 3.61E-12    | 75.66293909 |
| RBM14       | NM_001198836 | 154.7541901 | 5.482246799 | 1.80E-14    | 28.22824213 |
| 2-Mar       | NM_001005416 | 34.62248123 | 0.828013391 | 0.000346543 | 41.81391461 |
| COA6        | NM_001206641 | 66.85095245 | 0.434306782 | 4.94E-09    | 153.9256471 |
| SMIM12      | NM_138428    | 90.64102306 | 0.503789009 | 5.93E-13    | 179.9186195 |
| DCTPP1      | NM_024096    | 37.43528144 | 1.387294688 | 0.000393885 | 26.98437597 |
| CHPF2       | NM_019015    | 48.4177216  | 1.944243393 | 0.000122945 | 24.90311746 |
| NRSN2-AS1   | NR_109990    | 44.61731148 | 1.037140085 | 1.10E-05    | 43.01956133 |
| MPPE1       | NR_040243    | 57.84373212 | 0.430038849 | 9.77E-08    | 134.5081549 |
| ZNF789      | NM_213603    | 73.04537258 | 0.562648729 | 1.50E-09    | 129.8241137 |
| LOC730183   | NM_001256932 | 78.74598776 | 6.748141264 | 0.000266251 | 11.66928561 |
| PSMG3       | NM_001134340 | 103.0298633 | 8.027469441 | 9.11E-08    | 12.83466279 |
| SLC25A3     | NM_002635    | 129.6327341 | 2.033572653 | 1.89E-14    | 63.74630086 |
| KIF18B      | NM_001264573 | 67.83856237 | 0.297601798 | 5.00E-10    | 227.9507811 |
| SDCBP2-AS1  | NR_040049    | 56.36231725 | 1.158266812 | 1.91E-05    | 48.66091012 |
| S100A13     | NM_001024210 | 34.12867628 | 0.867089927 | 0.00162444  | 39.36001934 |
| PPP1CA      | NM_001008709 | 64.11316702 | 8.318373539 | 0.000522615 | 7.707416206 |
| S100A4      | NM_002961    | 51.2305218  | 5.720154162 | 0.002191422 | 8.95614355  |
| LINC00959   | NR_034125    | 54.61214173 | 0.094838804 | 2.60E-08    | 575.8417357 |
| HNRNPH1     | NM_001257293 | 184.6636661 | 4.357929707 | 4.65E-19    | 42.37417271 |
| IMP4        | NM_033416    | 30.67204158 | 0.3209645   | 0.000264898 | 95.56209976 |
| INTS1       | NM_001080453 | 34.12867628 | 0.171750583 | 8.06E-05    | 198.7106867 |
| OSGEPL1-AS1 | NR_102429    | 50.73671684 | 3.637680615 | 0.000145699 | 13.94754576 |
| SLC45A3     | NM_033102    | 30.82207112 | 0.830194682 | 0.00072303  | 37.12631721 |
| MFSD5       | NM_032889    | 66.92596722 | 8.606465699 | 0.000353416 | 7.776242835 |
| INPP5K      | NM_130766    | 33.63487132 | 0.436824079 | 0.000158938 | 76.99866589 |
| MSH6        | NM_000179    | 60.3127569  | 0.137544844 | 1.50E-09    | 438.4952224 |
| UNC119      | NM_005148    | 125.832324  | 5.635330724 | 1.02E-11    | 22.32918176 |
| SNHG4       | NR_036536    | 49.33031674 | 8.316600498 | 0.002995803 | 5.931548203 |
| ZNF77       | NM_021217    | 83.95279797 | 0.115941817 | 3.44E-13    | 724.0942086 |
| POLD1       | NR_046402    | 47.92391664 | 0.220895786 | 6.97E-07    | 216.9526065 |
| ABCB9       | NM_001243013 | 76.35197774 | 1.254602811 | 7.82E-08    | 60.85748976 |
| RNF207      | NM_207396    | 46.02371158 | 2.709724945 | 0.000227021 | 16.98464328 |
| TIGD6       | NM_030953    | 32.22847122 | 2.440289265 | 0.004819746 | 13.20682416 |
| BTG2        | NM_006763    | 181.3570609 | 7.943245887 | 6.83E-16    | 22.83160606 |
| PSMC4       | NM_153001    | 50.24291189 | 3.383986851 | 0.000244523 | 14.84725387 |
| PEA15       | NM_001297577 | 66.43216226 | 1.75161599  | 2.19E-07    | 37.92621366 |
| PPP6R2      | NM_014678    | 74.0329825  | 0.170920708 | 9.96E-10    | 433.1422634 |
| APLP1       | NM_001024807 | 42.22330147 | 2.839594119 | 0.000370348 | 14.86948476 |
| AMD1        | NM_001287216 | 66.85095245 | 0.641317652 | 1.10E-07    | 104.2400007 |
| LBX2        | NM_001009812 | 68.82617228 | 8.79629011  | 9.17E-05    | 7.824454562 |
| TCP1        | NM_030752    | 84.02781274 | 1.613361916 | 1.13E-09    | 52.08243228 |
| HBEGF       | NM_001945    | 137.2335544 | 1.445913628 | 2.76E-16    | 94.91130849 |
| PA2G4       | NM_006191    | 50.81173161 | 1.468608004 | 1.14E-05    | 34.59856646 |
| TMEM14B     | NM_030969    | 113.0246936 | 1.013432516 | 1.64E-14    | 111.5266106 |
| MON1A       | NM_001142501 | 56.51234679 | 1.974865177 | 1.23E-05    | 28.61579993 |
| ATG4D       | NM_032885    | 82.12760769 | 3.029256432 | 3.74E-08    | 27.11147423 |
| TMEM184B    | NM_012264    | 79.73359767 | 1.215728889 | 6.69E-08    | 65.58501521 |
| SURF4       | NM_033161    | 62.13794719 | 3.831414239 | 2.49E-05    | 16.21801855 |
| NOP2        | NM_001258309 | 73.53917754 | 0.791238448 | 2.15E-09    | 92.94186569 |
| TMEM120B    | NM_001080825 | 63.1255571  | 0.805083609 | 3.89E-07    | 78.40869743 |
| MARVELD3    | NM_052858    | 65.51956712 | 2.051107622 | 3.18E-07    | 31.94350526 |
| HNRNPDL     | NM_001207000 | 69.73876742 | 8.582422225 | 0.000126663 | 8.125767481 |
| BRF2        | NM_018310    | 74.87056287 | 1.400098273 | 1.34E-08    | 53.47521978 |
| SEPW1       | NM_003009    | 92.96001831 | 8.214655612 | 8.15E-07    | 11.31636221 |
| TRIM52-AS1  | NR_102762    | 43.62970157 | 1.133481048 | 0.000120789 | 38.49177862 |
| TMSB10      | NM_021103    | 142.4403646 | 35.60420789 | 0.000113095 | 4.000660962 |
| ARMC7       | NM_024585    | 81.63380273 | 5.766751504 | 5.28E-07    | 14.15594251 |
| GATC        | NM_176818    | 61.64414223 | 2.734052228 | 3.31E-06    | 22.54680492 |
| MYO19       | NM_001163735 | 57.84373212 | 1.543721559 | 1.91E-05    | 37.47031438 |

|              |              |             |             |             |             |
|--------------|--------------|-------------|-------------|-------------|-------------|
| ZNF526       | NM_133444    | 49.33031674 | 2.027720992 | 3.06E-05    | 24.32796076 |
| CST3         | NM_000099    | 107.8178834 | 4.348191721 | 1.47E-10    | 24.79602793 |
| PRMT5        | NM_001039619 | 41.31070632 | 4.206410782 | 0.003823805 | 9.820892076 |
| FABP5        | NM_001444    | 125.7573093 | 4.723835411 | 5.12E-12    | 26.62186514 |
| MLF2         | NM_005439    | 38.42289135 | 0.499138285 | 6.09E-05    | 76.9784497  |
| TMCO6        | NM_018502    | 67.34475741 | 0.783278878 | 1.49E-08    | 85.97800771 |
| DHFRL1       | NM_176815    | 71.14516752 | 0.559209517 | 2.57E-09    | 127.2245292 |
| LOC100505666 | NR_040772    | 50.31792665 | 0.87115236  | 1.50E-06    | 57.76019091 |
| RAD54L       | NM_003579    | 60.3127569  | 0.163868368 | 4.95E-09    | 368.0561273 |
| SLC25A5      | NM_001152    | 88.740818   | 6.345726945 | 8.97E-07    | 13.98434234 |
| CCDC134      | NM_024821    | 90.64102306 | 0.19954585  | 5.93E-13    | 454.236574  |
| FGS          | NR_110170    | 68.82617228 | 0.790324696 | 1.55E-08    | 87.08594413 |
| PPL          | NM_002705    | 40.81690136 | 0.142705458 | 1.73E-05    | 286.0220056 |
| ISL2         | NM_145805    | 65.51956712 | 2.096862735 | 5.53E-07    | 31.24647409 |
| RPS17        | NR_111943    | 106.2614537 | 8.928417751 | 5.09E-08    | 11.90148766 |
| TSPYL1       | NM_003309    | 55.03093192 | 4.467688905 | 0.000274874 | 12.31753891 |
| N4BP3        | NM_015111    | 40.81690136 | 1.08127199  | 0.000313333 | 37.74896763 |
| SF3A2        | NM_007165    | 67.34475741 | 0.899722357 | 2.11E-08    | 74.8505991  |
| IDUA         | NM_000203    | 41.23569155 | 2.349971489 | 0.000942341 | 17.54731568 |
| ING2         | NM_001564    | 27.021661   | 0.171541172 | 0.000291283 | 157.5228894 |
| TUT1         | NM_022830    | 97.32924815 | 0.690878598 | 1.53E-12    | 140.8774979 |
| RPL22L1      | NM_001099645 | 128.1513193 | 10.00328716 | 7.81E-10    | 12.81092077 |
| RRM2         | NM_001165931 | 96.34163824 | 4.431239419 | 1.01E-08    | 21.74146534 |
| EPHA2        | NM_004431    | 114.8498839 | 2.631814551 | 1.40E-11    | 43.63904889 |
| TNS4         | NM_032865    | 49.8241217  | 0.810968172 | 5.13E-05    | 61.43782633 |
| ARRDC1       | NM_152285    | 95.42904309 | 13.85642804 | 1.32E-05    | 6.886987237 |
| BSG          | NM_198589    | 57.34992716 | 3.663873683 | 6.72E-05    | 15.65281233 |
| HYAL3        | NM_001200031 | 68.82617228 | 8.871709761 | 0.000110969 | 7.757937775 |
| FUT4         | NM_002033    | 59.25013222 | 4.419243942 | 7.74E-05    | 13.40730066 |
| CNPY3        | NM_006586    | 32.72227618 | 1.324896045 | 0.003598386 | 24.69799522 |
| OXAI1L       | NM_005015    | 38.42289135 | 1.551712321 | 0.000393885 | 24.76160743 |
| LOC100289230 | NR_036530    | 117.3189086 | 4.671330388 | 4.11E-10    | 25.11466732 |
| ULK3         | NM_001284365 | 74.52678745 | 2.571507035 | 1.19E-07    | 28.98175523 |
| DOLK         | NM_014908    | 113.9372887 | 13.79204041 | 4.59E-07    | 8.261090119 |
| ELK1         | NM_001257168 | 46.51751654 | 0.447636252 | 2.01E-05    | 103.9181173 |
| BABAM1       | NM_014173    | 45.52990662 | 0.785943909 | 3.14E-05    | 57.93022392 |
| TRMU         | NR_104241    | 90.71603783 | 2.675138483 | 2.52E-09    | 33.91078197 |
| TMEM127      | NM_001193304 | 74.52678745 | 0.763760101 | 5.26E-09    | 97.57879118 |
| FAM86B3P     | NR_024363    | 43.13589661 | 0.469493435 | 2.98E-05    | 91.87752873 |
| RPL35A       | NM_000996    | 74.0329825  | 0.801495761 | 1.85E-09    | 92.36852659 |
| LETM1        | NM_012318    | 38.34787658 | 0.377341546 | 0.000122269 | 101.6264362 |
| TRIM11       | NM_145214    | 79.80861244 | 0.7522393   | 4.12E-10    | 106.0947128 |
| STAG3L5P     | NR_103720    | 141.5277694 | 1.419879291 | 1.19E-17    | 99.67591636 |
| DUSP2        | NM_004418    | 88.32202782 | 7.943995386 | 2.62E-06    | 11.11808649 |
| ZNF784       | NM_203374    | 26.10906586 | 0.385043853 | 0.002272915 | 67.80803179 |
| TSPAN17      | NM_001006616 | 66.92596722 | 0.235100333 | 2.45E-09    | 284.6698105 |
| NUBP2        | NM_012225    | 39.33548649 | 3.85895794  | 0.002696539 | 10.19329236 |
| CTSB         | NM_147780    | 84.5216177  | 2.289197939 | 1.17E-08    | 36.92193508 |
| FDX1L        | NM_001031734 | 65.51956712 | 0.685351785 | 4.31E-08    | 95.59990734 |
| AP1G2        | NM_001282475 | 31.73466626 | 1.853614644 | 0.003829767 | 17.12042272 |
| ECE2         | NM_032331    | 47.92391664 | 2.51705838  | 5.46E-05    | 19.0396524  |
| ZFP36        | NM_003407    | 147.7221896 | 28.56516299 | 1.18E-06    | 5.171410701 |
| AJUBA        | NM_001289097 | 61.64414223 | 4.669311982 | 1.79E-05    | 13.20197547 |
| SFR1         | NM_001002759 | 132.9393393 | 1.397929738 | 5.60E-17    | 95.09729684 |
| CDK10        | NR_027702    | 89.08459342 | 19.78693832 | 0.000364043 | 4.502191899 |
| ZFAND2B      | NM_001270999 | 48.91152655 | 4.581710367 | 0.000514546 | 10.67538597 |
| PTPN23       | NM_015466    | 118.7253087 | 0.145115662 | 9.84E-18    | 818.1426273 |
| PYCR2        | NM_001271681 | 113.4434838 | 2.100491355 | 1.15E-12    | 54.00806983 |
| REPIN1       | NM_001099695 | 36.02888133 | 1.332772231 | 0.000330125 | 27.03303722 |
| VEGFA        | NM_001171627 | 156.7294099 | 4.983846192 | 1.33E-14    | 31.4474813  |
| RELA         | NM_001243985 | 49.33031674 | 1.695510691 | 3.06E-05    | 29.0946657  |
| TIMM8A       | NM_001145951 | 71.22018229 | 6.059224114 | 0.001524441 | 11.75401024 |
| SPRY4        | NM_030964    | 113.9372887 | 1.722330466 | 2.01E-12    | 66.1529776  |
| LOC100630923 | NR_038967    | 57.34992716 | 1.084921183 | 2.15E-06    | 52.86091568 |
| ZER1         | NM_006336    | 65.51956712 | 1.603650159 | 2.52E-06    | 40.85652146 |



|              |              |             |             |             |             |
|--------------|--------------|-------------|-------------|-------------|-------------|
| RPARP-AS1    | NR_038937    | 55.94352706 | 11.04635331 | 0.003957333 | 5.064433982 |
| TARS2        | NR_073514    | 57.84373212 | 0.049682161 | 7.33E-10    | 1164.275697 |
| PPM1J        | NM_005167    | 80.72120758 | 1.266827882 | 7.62E-10    | 63.71915926 |
| EXOSC2       | NM_001282708 | 55.03093192 | 0.443032771 | 5.49E-07    | 124.2141338 |
| KLC2         | NM_022822    | 65.51956712 | 6.620019995 | 6.77E-05    | 9.897185684 |
| GGA3         | NM_001291641 | 57.76871735 | 3.036838042 | 2.30E-05    | 19.02265335 |
| TKT          | NR_047580    | 57.27491239 | 4.355528449 | 0.000179185 | 13.14993417 |
| RNH1         | NM_203384    | 44.54229671 | 2.747916509 | 0.000190342 | 16.20947964 |
| PFKFB3       | NM_001145443 | 72.13277744 | 1.528386723 | 1.29E-06    | 47.19537036 |
| PMF1-BGLAP   | NM_001199663 | 40.74188659 | 1.147890639 | 0.000827666 | 35.49282938 |
| TSPO         | NR_046308    | 42.22330147 | 2.560456421 | 0.000348152 | 16.49053705 |
| LOC101929295 | NR_110303    | 33.63487132 | 0.899152555 | 0.00081299  | 37.40730219 |
| PNP          | NM_000270    | 156.235605  | 0.183375589 | 7.84E-25    | 851.9978352 |
| MRPL43       | NM_176794    | 44.9610869  | 2.063685416 | 0.000280309 | 21.78679296 |
| ACP2         | NM_001131064 | 96.76042842 | 7.709865058 | 2.47E-07    | 12.55021037 |
| ARMC5        | NM_001105247 | 45.52990662 | 1.037020139 | 2.56E-05    | 43.90455393 |
| POLD4        | NM_001256870 | 47.43011168 | 4.862110188 | 0.001736784 | 9.755046647 |
| EGLN2        | NM_080732    | 62.21296196 | 2.050112905 | 5.90E-07    | 30.34611499 |
| PLCB3        | NM_000932    | 75.51439737 | 3.763161604 | 1.95E-06    | 20.06674316 |
| WDR73        | NM_032856    | 48.4177216  | 1.939072634 | 5.46E-05    | 24.96952448 |
| CHCHD10      | NM_001301339 | 118.650294  | 2.87451825  | 1.06E-11    | 41.276584   |
| FUS          | NM_001170634 | 203.7407314 | 4.240668649 | 5.64E-21    | 48.04448266 |
| TNK1         | NM_001251902 | 71.14516752 | 9.513389268 | 8.76E-05    | 7.478424936 |
| AMOTL2       | NM_001278685 | 62.13794719 | 1.167670345 | 9.01E-07    | 53.2153167  |
| CTU2         | NM_001012759 | 37.43528144 | 1.900607968 | 0.000895218 | 19.69647717 |
| CCDC115      | NM_032357    | 46.02371158 | 2.292635652 | 0.000213483 | 20.07458601 |
| MMS19        | NM_022362    | 42.64209165 | 0.649392547 | 3.72E-05    | 65.66458428 |
| WDR34        | NM_052844    | 44.04849175 | 2.653300489 | 0.000609574 | 16.60139586 |
| FAM86EP      | NR_024253    | 48.4177216  | 1.713629494 | 5.78E-05    | 28.2544866  |
| FBXO18       | NM_001258452 | 101.5484485 | 0.915281816 | 4.94E-11    | 110.9477395 |
| ACIN1        | NM_001164816 | 53.62453181 | 1.718152804 | 1.08E-05    | 31.21057201 |
| SLC30A5      | NM_001251969 | 55.4497221  | 0.470030778 | 5.49E-07    | 117.9704069 |
| NXF1         | NM_006362    | 125.6822945 | 4.99565162  | 2.57E-11    | 25.1583385  |
| LOC100507316 | NR_120682    | 71.56395771 | 11.97893785 | 0.001278627 | 5.974148842 |
| CREBZF       | NR_028027    | 113.9372887 | 0.744980294 | 1.20E-15    | 152.9400035 |
| SEPHS2       | NM_012248    | 58.75632726 | 2.097016816 | 8.69E-06    | 28.01900625 |
| NIP7         | NM_016101    | 55.03093192 | 4.95390764  | 0.000171852 | 11.10859062 |
| MAT2A        | NM_005911    | 127.0886946 | 11.87106589 | 4.58E-09    | 10.70575261 |
| CDKN1C       | NM_001122631 | 84.94040789 | 1.617184113 | 6.71E-09    | 52.52364725 |
| PPIB         | NM_000942    | 65.51956712 | 8.097411631 | 0.000212284 | 8.091421075 |
| NR1D1        | NM_021724    | 44.46728194 | 3.256543123 | 0.000706521 | 13.65474992 |
| SLC25A29     | NM_152333    | 48.83651178 | 0.173438281 | 1.31E-07    | 281.5786205 |
| RPS14        | NM_005617    | 93.94762822 | 2.444295393 | 6.13E-10    | 38.43546426 |
| CHID1        | NM_001142677 | 67.83856237 | 0.284297518 | 2.43E-09    | 238.6182013 |
| PARS2        | NM_152268    | 65.44455235 | 0.711787964 | 8.70E-09    | 91.94388737 |
| NQO1         | NM_001286137 | 58.33753707 | 2.755068116 | 1.45E-05    | 21.17462604 |
| ASL          | NM_001024944 | 124.3509092 | 1.170771472 | 1.29E-15    | 106.2127939 |
| GSTK1        | NM_015917    | 118.5752792 | 3.183554004 | 3.18E-12    | 37.24619688 |
| TPRKB        | NM_016058    | 40.17306687 | 1.431666302 | 0.00022227  | 28.06035654 |
| PDRG1        | NM_030815    | 50.16789712 | 0.706479992 | 1.50E-06    | 71.01106569 |
| ZNF74        | NM_001256525 | 44.04849175 | 0.945915365 | 0.000136016 | 46.56705389 |
| ASB16-AS1    | NR_049730    | 111.4682639 | 1.06589356  | 1.18E-13    | 104.5772938 |
| FKBP1A       | NM_001199786 | 62.63175215 | 1.234079197 | 1.55E-06    | 50.75180937 |
| LOC100288152 | NR_125375    | 65.02576216 | 8.618572076 | 0.000234464 | 7.544841719 |
| KCTD5        | NM_018992    | 122.0319139 | 0.788580753 | 4.41E-15    | 154.7487856 |
| SNAI1        | NM_005985    | 124.9197289 | 7.53318652  | 1.75E-10    | 16.58258806 |
| MAPK7        | NM_139034    | 35.61009115 | 1.385910266 | 0.00081299  | 25.69436999 |
| IQQC         | NM_001160042 | 82.62141264 | 3.055827213 | 2.80E-08    | 27.03733126 |
| NDUFS5       | NM_004552    | 73.04537258 | 0.935650903 | 1.50E-09    | 78.06904511 |
| CDAN1        | NM_138477    | 69.81378219 | 4.087851637 | 6.21E-06    | 17.07835518 |
| ZNF142       | NR_073600    | 37.85407162 | 0.052318077 | 2.76E-06    | 723.537136  |
| PTGES2       | NM_025072    | 47.92391664 | 2.599557541 | 0.000243234 | 18.43541291 |
| ATP6V1F      | NM_001198909 | 61.719157   | 5.053454923 | 4.99E-05    | 12.21325963 |
| SNHG1        | NR_003098    | 168.4744157 | 13.3026427  | 1.42E-12    | 12.66473282 |
| MRPL21       | NM_181514    | 66.35714749 | 0.394988409 | 8.70E-09    | 167.9977082 |

|               |              |             |             |             |             |
|---------------|--------------|-------------|-------------|-------------|-------------|
| MRPL12        | NM_002949    | 54.53712696 | 0.488481963 | 7.06E-07    | 111.6461426 |
| RPL9          | NM_000661    | 83.45899302 | 1.738864938 | 4.95E-09    | 47.99624812 |
| CAMTA2        | NM_015099    | 33.14106636 | 2.166611429 | 0.003805536 | 15.29626675 |
| CBX8          | NM_020649    | 62.55673738 | 8.830766774 | 0.001037654 | 7.083953068 |
| ZNF837        | NM_138466    | 92.04742316 | 3.146899259 | 9.28E-09    | 29.25019697 |
| AIF1L         | NM_031426    | 39.90430622 | 0.305724729 | 1.73E-05    | 130.5236456 |
| TMEM107       | NM_183065    | 74.52678745 | 17.339747   | 0.001775558 | 4.298031998 |
| NOL12         | NM_024313    | 64.45694244 | 1.964830257 | 8.21E-07    | 32.80534906 |
| PLEKHM1       | NR_027782    | 143.6967351 | 1.630278323 | 8.70E-15    | 88.14245588 |
| SNUPN         | NM_001042588 | 21.81485078 | 0.293279944 | 0.004785512 | 74.38234782 |
| CTPS1         | NR_125440    | 76.92079747 | 0.901274118 | 2.86E-08    | 85.34672854 |
| LOC100131691  | NR_027334    | 73.46416277 | 7.40465934  | 1.70E-05    | 9.921342683 |
| AURKB         | NM_001284526 | 92.54122812 | 4.881831053 | 1.79E-08    | 18.95625373 |
| RPLP1         | NM_001003    | 141.4527547 | 18.29939069 | 2.48E-08    | 7.729916097 |
| HAP1          | NM_177977    | 122.5257189 | 0.19882655  | 1.04E-19    | 616.2442548 |
| HNRNPAB       | NM_004499    | 137.6523446 | 9.413846123 | 1.59E-10    | 14.62232787 |
| SNHG7         | NR_024543    | 158.5546002 | 26.40975848 | 7.89E-08    | 6.003636888 |
| SUOX          | NM_001032387 | 68.82617228 | 1.49400187  | 2.80E-07    | 46.06833075 |
| PRDX1         | NM_181696    | 136.2459445 | 3.277780051 | 7.79E-14    | 41.5665305  |
| DBI           | NM_001178017 | 38.42289135 | 0.957374335 | 0.000209145 | 40.13361329 |
| BCL2L2-PABPN1 | NM_001199864 | 36.02888133 | 1.045068185 | 0.001111374 | 34.47514894 |
| FICD          | NM_007076    | 75.02059241 | 6.811893916 | 8.94E-06    | 11.01317685 |
| MARS2         | NM_138395    | 84.02781274 | 8.484736594 | 9.98E-06    | 9.903408528 |
| MAP3K14-AS1   | NR_110326    | 71.63897248 | 3.00631984  | 5.40E-07    | 23.82945804 |
| NDUFV3        | NM_001001503 | 85.35919808 | 0.134152032 | 3.91E-13    | 636.2870323 |
| ZNF646        | NM_014699    | 76.42699251 | 4.233845513 | 3.52E-07    | 18.05143629 |
| SOD2          | NM_001024465 | 81.63380273 | 0.364407006 | 1.46E-11    | 224.0182035 |
| RPSA          | NM_002295    | 98.24184329 | 1.059825679 | 1.56E-12    | 92.69622847 |
| RCC1          | NM_001048199 | 78.74598776 | 18.60401513 | 0.000942341 | 4.232741545 |
| ABCD4         | NM_005050    | 51.64931199 | 0.425604248 | 2.56E-07    | 121.3552548 |
| TEX22         | NM_001195082 | 36.52268629 | 3.31300542  | 0.002122458 | 11.02403457 |
| UBL7          | NM_201265    | 107.7428686 | 0.254404672 | 3.42E-16    | 423.5097867 |
| EZR           | NM_001111077 | 62.21296196 | 1.573365849 | 6.44E-06    | 39.54131966 |
| RPP25L        | NM_148179    | 102.0422534 | 18.19049048 | 9.30E-05    | 5.609648268 |
| NUSAP1        | NM_001243144 | 46.02371158 | 0.097097172 | 1.00E-06    | 473.9964141 |
| GPD1          | NM_001257199 | 37.92908639 | 1.65788481  | 0.000655852 | 22.87799862 |
| PSMG4         | NM_001128592 | 66.92596722 | 0.741614569 | 2.12E-08    | 90.24359823 |
| MFGE8         | NM_001114614 | 103.4486535 | 0.700722367 | 1.32E-13    | 147.6314421 |
| TMEM184A      | NM_001097620 | 27.44045119 | 0.55641226  | 0.000776927 | 49.31676233 |
| DNM2          | NM_004945    | 94.44143318 | 0.278860957 | 1.31E-11    | 338.6685404 |
| KDELR1        | NM_006801    | 64.11316702 | 0.28923743  | 7.46E-09    | 221.6627603 |
| HIST1H2BK     | NM_080593    | 74.52678745 | 1.138991355 | 2.15E-09    | 65.43226789 |
| JMJD4         | NM_023007    | 116.7500889 | 9.008647528 | 4.02E-09    | 12.95977987 |
| ZWINT         | NM_001005413 | 47.92391664 | 2.747814671 | 9.06E-05    | 17.44073833 |
| CDKN2AIPNL    | NM_080656    | 66.43216226 | 2.677459418 | 3.77E-06    | 24.81164114 |
| PRODH         | NM_001195226 | 54.043322   | 2.561600588 | 3.83E-05    | 21.09748189 |
| ACADVL        | NM_001033859 | 73.12038735 | 18.13272874 | 0.002758906 | 4.032508751 |
| SWI5          | NM_001040011 | 54.043322   | 4.313895741 | 0.000188406 | 12.52773021 |
| TPI1          | NM_001159287 | 97.82305311 | 22.21303959 | 0.00018459  | 4.403857144 |
| MAD2L2        | NM_006341    | 50.31792665 | 4.160567977 | 0.000182226 | 12.09400422 |
| ZMYM6NB       | NM_001195156 | 41.23569155 | 1.387444116 | 0.000436662 | 29.72061437 |
| LOC100996437  | NR_110037    | 123.932119  | 1.129452051 | 1.43E-15    | 109.7276497 |
| RPS20         | NM_001146227 | 117.2438939 | 11.89394858 | 3.77E-08    | 9.857440788 |
| RBMX          | NM_001164803 | 87.82822286 | 3.280438006 | 1.53E-08    | 26.77332195 |
| RUFY1         | NM_025158    | 75.51439737 | 3.204703833 | 8.28E-07    | 23.5636119  |
| ADNP-AS1      | NR_110009    | 35.61009115 | 1.315637101 | 0.002191422 | 27.0668037  |
| NSUN4         | NR_045790    | 32.72227618 | 0.369270124 | 0.000348152 | 88.61338628 |
| AGAP2         | NM_014770    | 24.62765099 | 0.503839398 | 0.002159735 | 48.87996273 |
| ARPC1B        | NM_005720    | 58.83134203 | 5.181036843 | 8.32E-05    | 11.35512906 |
| TBCC          | NM_003192    | 87.82822286 | 7.548491984 | 2.26E-06    | 11.63520118 |
| PRPF6         | NM_012469    | 24.55263622 | 0.179505713 | 0.002159735 | 136.7791353 |
| EIF5          | NM_001969    | 84.02781274 | 6.042487616 | 1.27E-06    | 13.90616218 |
| POLDIP2       | NM_001290145 | 45.03610167 | 3.611665909 | 0.001034534 | 12.46962006 |
| ZKSCAN3       | NM_001242895 | 43.13589661 | 1.356037617 | 0.000314081 | 31.81025075 |
| MPV17L2       | NM_032683    | 74.45177268 | 11.75719796 | 0.000181696 | 6.332441876 |

|              |              |             |             |             |             |
|--------------|--------------|-------------|-------------|-------------|-------------|
| FASN         | NM_004104    | 145.2531648 | 1.897173455 | 7.89E-16    | 76.56293334 |
| CEBPA        | NM_004364    | 168.1306403 | 11.33866293 | 7.29E-13    | 14.82808346 |
| KLF5         | NM_001730    | 92.61624289 | 0.494577598 | 4.96E-12    | 187.2633197 |
| SMDT1        | NM_033318    | 58.83134203 | 1.429436004 | 8.18E-07    | 41.15703106 |
| PYGO2        | NM_138300    | 100.1420484 | 7.457737795 | 7.60E-08    | 13.42793902 |
| RPS13        | NM_001017    | 86.84061295 | 2.58036041  | 1.08E-08    | 33.65445099 |
| ISCA2        | NM_001272007 | 68.82617228 | 5.294088415 | 3.70E-05    | 13.00057099 |
| FUT11        | NM_173540    | 79.73359767 | 15.22065156 | 0.000245374 | 5.238514091 |
| HGH1         | NM_016458    | 179.4568558 | 32.56311328 | 1.38E-08    | 5.511047248 |
| OGFR         | NM_007346    | 37.51029621 | 1.38757109  | 0.000655852 | 27.03306265 |
| RAB24        | NR_109790    | 33.63487132 | 2.485702237 | 0.003199542 | 13.53133566 |
| RAB4B-EGLN2  | NR_037791    | 45.03610167 | 2.519304219 | 0.000347701 | 17.87640466 |
| UBE2A        | NM_003336    | 39.82929145 | 0.892571322 | 0.000191558 | 44.62309114 |
| U2AF2        | NM_007279    | 78.74598776 | 3.619973311 | 5.81E-07    | 21.75319567 |
| TSC22D1      | NM_006022    | 95.35402832 | 5.255245747 | 2.97E-08    | 18.14454222 |
| SLC35C2      | NM_001281460 | 47.50512645 | 0.297572055 | 2.29E-07    | 159.6424317 |
| LINC00910    | NR_027412    | 87.31553738 | 2.642003743 | 3.92E-09    | 33.04898322 |
| TUBB3        | NM_006086    | 206.5535316 | 13.21169191 | 3.87E-16    | 15.63414686 |
| ARRDC3       | NM_020801    | 64.45694244 | 1.933453626 | 6.48E-07    | 33.33772353 |
| NIT1         | NM_001185093 | 50.31792665 | 4.997042571 | 0.001027464 | 10.06954132 |
| KANSL1-AS1   | NR_034172    | 59.74393718 | 7.191195676 | 0.000201251 | 8.307928176 |
| ISYNA1       | NM_001170938 | 65.93835731 | 16.22908462 | 0.004089732 | 4.062974521 |
| DYNLL1       | NM_001037495 | 108.7304785 | 18.2832906  | 1.45E-05    | 5.946986287 |
| FKBP3        | NM_002013    | 96.34163824 | 0.943199291 | 1.10E-11    | 102.1434591 |
| PHLDB1       | NM_001144758 | 29.90947597 | 0.058981121 | 0.000265346 | 507.1025367 |
| NDUFS8       | NM_002496    | 47.43011168 | 0.539861884 | 1.60E-06    | 87.85601111 |
| BLCAP        | NM_006698    | 76.92079747 | 0.443794702 | 1.25E-10    | 173.3251821 |
| EIF3J-AS1    | NR_034170    | 66.92596722 | 8.693091697 | 0.000390477 | 7.698753165 |
| TAF6L        | NM_006473    | 40.81690136 | 2.502725592 | 0.000911282 | 16.30897989 |
| PPOX         | NM_000309    | 51.2305218  | 3.278938582 | 7.75E-05    | 15.62411754 |
| PMS2L2       | NR_003614    | 94.44143318 | 0.163157206 | 1.25E-14    | 578.8370324 |
| UBE2C        | NM_001281742 | 66.35714749 | 6.447945099 | 7.37E-05    | 10.29120851 |
| ZNF791       | NM_153358    | 49.8241217  | 0.257678787 | 3.54E-07    | 193.3574828 |
| LOC101927021 | NR_110068    | 84.44660293 | 2.548762104 | 9.63E-09    | 33.13239897 |
| ERCC1        | NM_001983    | 58.33753707 | 3.502439248 | 0.000100456 | 16.65625952 |
| TSC22D4      | NM_030935    | 84.94040789 | 1.504018383 | 5.45E-10    | 56.47564475 |
| AKR1A1       | NM_006066    | 65.86334254 | 0.96029975  | 2.50E-07    | 68.58623312 |
| NDUFAB1      | NM_005003    | 69.73876742 | 0.966278405 | 5.47E-08    | 72.17254062 |
| LOC401585    | NR_125365    | 26.10906586 | 0.227138431 | 0.002272915 | 114.9478129 |
| RPL28        | NM_001136136 | 173.7562407 | 30.90175704 | 6.43E-07    | 5.622859581 |
| NFKBID       | NM_139239    | 70.65136257 | 2.720886863 | 1.29E-06    | 25.96629927 |
| PDCD2        | NM_001199461 | 46.93630673 | 0.870952424 | 1.63E-05    | 53.89078145 |
| HERPUD1      | NM_001010989 | 153.34779   | 0.775438958 | 5.62E-21    | 197.7561077 |
| H2AFV        | NM_012412    | 64.87573262 | 1.248567023 | 2.50E-07    | 51.96015226 |
| LOC493754    | NR_111973    | 81.63380273 | 0.008170022 | 1.64E-14    | 9991.87025  |
| CSTB         | NM_000100    | 92.12243793 | 7.253111403 | 4.12E-07    | 12.70109237 |
| TOR3A        | NM_022371    | 72.55156763 | 2.485498023 | 1.94E-07    | 29.18995186 |
| SCAMP3       | NM_052837    | 64.53195721 | 1.822269928 | 5.53E-07    | 35.41295185 |
| DYNLRB1      | NM_001281728 | 90.14721811 | 0.120586968 | 5.34E-15    | 747.5701509 |
| SLC25A38     | NM_017875    | 70.65136257 | 4.197943619 | 3.28E-06    | 16.8299932  |
| OR51B5       | NM_001005567 | 62.13794719 | 0.650976609 | 7.53E-07    | 95.45342537 |
| LFNG         | NM_001040168 | 45.60492139 | 7.353653958 | 0.0049736   | 6.201668131 |
| DDX39A       | NR_046366    | 43.13589661 | 5.747239683 | 0.002637486 | 7.505498116 |
| AFMID        | NR_027083    | 125.2635043 | 3.537375307 | 2.31E-12    | 35.41142611 |
| CAD          | NM_004341    | 93.94762822 | 0.33549672  | 1.85E-12    | 280.0254747 |
| LAMA5        | NM_005560    | 55.52473687 | 0.295997151 | 6.33E-07    | 187.5853762 |
| SRXN1        | NM_080725    | 51.72432676 | 3.785597334 | 0.000156653 | 13.66345181 |
| TPT1-AS1     | NR_024458    | 31.73466626 | 0.172332784 | 0.000348152 | 184.1475866 |
| WDR55        | NM_017706    | 95.84783328 | 3.427905378 | 1.22E-09    | 27.96104989 |
| DNNTIP1      | NM_052951    | 56.93113697 | 0.161081119 | 4.61E-09    | 353.431471  |
| SUMF2        | NM_001042469 | 90.64102306 | 0.977212079 | 4.58E-11    | 92.75471004 |
| CHCHD7       | NM_024300    | 132.8643245 | 3.773598283 | 2.51E-13    | 35.20892118 |
| SNHG12       | NR_024127    | 151.8663751 | 25.20610577 | 6.61E-08    | 6.02498365  |
| KAT5         | NM_182710    | 62.63175215 | 14.50991869 | 0.00427188  | 4.316478507 |
| PPP2R4       | NM_001271832 | 65.02576216 | 0.427612485 | 1.39E-08    | 152.0670338 |

|              |              |             |             |             |             |
|--------------|--------------|-------------|-------------|-------------|-------------|
| GAMT         | NM_000156    | 77.33958766 | 7.620467901 | 6.12E-06    | 10.148929   |
| ATP5SL       | NM_001167869 | 76.77076793 | 2.674184386 | 1.02E-07    | 28.70810567 |
| RPL31        | NM_000993    | 110.5556688 | 7.103109453 | 8.55E-09    | 15.56440451 |
| C17orf89     | NM_001086521 | 45.94869681 | 5.773432146 | 0.002846449 | 7.958644988 |
| PSMA7        | NM_002792    | 81.21501254 | 3.666514948 | 3.30E-07    | 22.15046541 |
| CARS2        | NM_024537    | 43.62970157 | 0.48020657  | 4.50E-05    | 90.85611126 |
| CAMK2G       | NM_172171    | 48.91152655 | 0.207082439 | 2.33E-06    | 236.1935028 |
| RPS23        | NM_001025    | 82.54639787 | 8.540647126 | 9.07E-06    | 9.665122169 |
| PRR23D2      | NM_001282478 | 27.93425614 | 0.220512206 | 0.000779209 | 126.6789567 |
| PSMD7        | NM_002811    | 74.0329825  | 1.671486973 | 8.57E-08    | 44.29168979 |
| ADAMTS7      | NM_014272    | 38.42289135 | 0.146310912 | 4.59E-05    | 262.6112492 |
| KIF22        | NM_001256269 | 36.94147648 | 0.934027356 | 0.000718549 | 39.55074362 |
| PPAP2C       | NM_177526    | 36.1038961  | 0.717752997 | 0.000330125 | 50.30128229 |
| SCO2         | NM_001169111 | 98.66063348 | 23.761377   | 0.000488542 | 4.152142928 |
| EIF3J        | NM_001284336 | 96.41665301 | 0.336046509 | 6.70E-13    | 286.9146097 |
| POLR2G       | NM_002696    | 84.02781274 | 1.403444714 | 4.45E-10    | 59.87254924 |
| HSPB1        | NM_001540    | 59.32514699 | 4.308570921 | 7.44E-05    | 13.76910072 |
| SMARCB1      | NM_003073    | 79.6585829  | 0.533373423 | 5.01E-10    | 149.3486167 |
| LGALS3       | NM_001177388 | 91.13482802 | 0.327885241 | 5.93E-13    | 277.9473323 |
| LSM5         | NM_001139499 | 75.93318755 | 2.177275862 | 9.06E-08    | 34.87531777 |
| THAP3        | NM_138350    | 55.03093192 | 4.240998457 | 0.000152046 | 12.97593773 |
| ATP2A3       | NM_174955    | 60.80656186 | 0.20592704  | 1.61E-08    | 295.2820665 |
| PNPO         | NM_018129    | 94.44143318 | 1.686459221 | 8.13E-11    | 55.99983207 |
| ELOVL1       | NM_001256401 | 99.22945321 | 18.81842018 | 5.26E-05    | 5.272995941 |
| PRDX5        | NM_012094    | 39.33548649 | 1.364222367 | 0.000436662 | 28.83363259 |
| SFPQ         | NM_005066    | 147.57216   | 2.105350699 | 6.03E-17    | 70.09386137 |
| GYS1         | NR_027763    | 94.44143318 | 0.760451742 | 3.44E-11    | 124.1912247 |
| CNN2         | NM_004368    | 39.33548649 | 4.259462461 | 0.004647094 | 9.234847556 |
| TPM2         | NM_001301227 | 49.33031674 | 0.978867556 | 7.74E-06    | 50.39529243 |
| MPI          | NM_001289155 | 40.32309641 | 3.663123097 | 0.003618472 | 11.0078464  |
| IDH1-AS1     | NR_046452    | 67.91357713 | 2.717289571 | 7.61E-05    | 24.99313207 |
| SLC12A9      | NM_001267814 | 29.8344612  | 0.528096986 | 0.00067614  | 56.49428417 |
| MRPL10       | NM_145255    | 102.8798338 | 2.573715935 | 3.40E-11    | 39.97326681 |
| AGFG2        | NM_006076    | 68.33236732 | 0.5982693   | 6.59E-09    | 114.216737  |
| HNRNPC       | NM_001077442 | 130.0515243 | 1.259248282 | 1.12E-13    | 103.2771108 |
| ATAD3B       | NM_031921    | 50.31792665 | 0.14068299  | 4.37E-08    | 357.6688747 |
| YPEL1        | NM_013313    | 22.30865574 | 0.161658434 | 0.003847617 | 137.9987121 |
| PABPC4       | NM_001135654 | 123.932119  | 3.101694656 | 2.60E-12    | 39.95626028 |
| LAMTOR5-AS1  | NR_102697    | 40.24808164 | 1.498050416 | 0.000283421 | 26.86697404 |
| PARP16       | NM_017851    | 41.23569155 | 0.75492133  | 6.66E-05    | 54.62250156 |
| LBR          | NM_194442    | 34.12867628 | 0.368188307 | 0.000158938 | 92.69353645 |
| ULBP3        | NM_024518    | 51.2305218  | 0.237755792 | 1.07E-07    | 215.4753891 |
| SMTN         | NM_006932    | 142.8591548 | 6.017502484 | 3.24E-12    | 23.74060587 |
| GNPDA1       | NM_005471    | 32.72227618 | 0.975115321 | 0.003362431 | 33.55733981 |
| XYLT2        | NR_110010    | 25.6152609  | 0.459393515 | 0.001732498 | 55.75886482 |
| RAB4B        | NM_016154    | 45.03610167 | 1.240443275 | 0.000127729 | 36.30645801 |
| TFAM         | NR_073073    | 40.74188659 | 0.207232325 | 3.51E-06    | 196.6000551 |
| LOC101928069 | NR_120586    | 107.7428686 | 8.121272049 | 3.04E-08    | 13.26674786 |
| DDX49        | NM_019070    | 50.73671684 | 0.326964299 | 5.56E-07    | 155.175097  |
| RHBDF2       | NM_024599    | 123.3632992 | 0.677930421 | 3.48E-15    | 181.9704432 |
| POLR3K       | NM_016310    | 62.21296196 | 1.769676579 | 1.35E-06    | 35.15498973 |
| CES2         | NM_198061    | 44.54229671 | 1.177483094 | 5.09E-05    | 37.82839595 |
| STK40        | NM_032017    | 92.12243793 | 1.155867052 | 2.06E-09    | 79.69985628 |
| MGAT1        | NM_002406    | 53.62453181 | 1.657417046 | 9.20E-06    | 32.35427797 |
| GRINA        | NM_000837    | 73.61419231 | 4.609478195 | 1.94E-06    | 15.9701791  |
| SLC25A19     | NM_021734    | 155.247995  | 1.956219574 | 2.33E-17    | 79.36123181 |
| GLT8D1       | NM_001278281 | 54.11833677 | 1.176052663 | 4.09E-06    | 46.01693314 |
| MTFR1L       | NM_001099625 | 88.32202782 | 3.868554153 | 3.12E-08    | 22.83075907 |
| DTX2         | NM_001102594 | 84.44660293 | 0.072668848 | 5.52E-14    | 1162.074331 |
| LMBR1L       | NM_001300750 | 33.06605159 | 0.15927758  | 1.84E-05    | 207.6001628 |
| TOP3B        | NM_001282112 | 125.832324  | 1.571225659 | 4.25E-14    | 80.08545642 |
| BAK1         | NM_001188    | 74.0329825  | 4.430694654 | 3.11E-06    | 16.70911409 |
| POLG         | NM_002693    | 140.0463546 | 5.176111538 | 2.18E-12    | 27.05628608 |
| TMEM69       | NM_016486    | 59.74393718 | 0.743919911 | 4.19E-08    | 80.30963593 |
| LOC100505915 | NR_125434    | 39.33548649 | 0.121722011 | 1.95E-06    | 323.1583679 |

|            |              |             |             |             |             |
|------------|--------------|-------------|-------------|-------------|-------------|
| C11orf24   | NM_022338    | 52.14311694 | 1.812905594 | 1.93E-05    | 28.76217996 |
| ARHGEF39   | NM_032818    | 62.13794719 | 4.94481033  | 4.47E-05    | 12.56629538 |
| BBS1       | NM_024649    | 67.34475741 | 0.968812941 | 1.70E-07    | 69.5126526  |
| UTP14A     | NM_001166221 | 24.2088608  | 0.322988288 | 0.004785512 | 74.9527512  |
| TAF6       | NM_005641    | 63.96313748 | 1.189193394 | 3.32E-07    | 53.78699361 |
| APBB3      | NM_006051    | 42.07327193 | 1.99345506  | 0.000120789 | 21.10570375 |
| GSDMD      | NM_001166237 | 33.70988609 | 2.335923025 | 0.002568095 | 14.43107745 |
| WDR1       | NM_017491    | 83.1152176  | 0.886100567 | 9.28E-09    | 93.79885387 |
| OSER1-AS1  | NR_038337    | 80.64619281 | 1.043130927 | 1.58E-09    | 77.31166887 |
| C19orf12   | NM_001256047 | 34.62248123 | 1.253233855 | 0.002480994 | 27.62651289 |
| AIMP2      | NM_006303    | 76.8457827  | 2.737152016 | 3.93E-07    | 28.07508763 |
| ZNF557     | NM_001044387 | 46.02371158 | 0.949851726 | 8.53E-05    | 48.4535747  |
| MID1IP1    | NM_001098791 | 61.719157   | 14.96259724 | 0.003447717 | 4.124895965 |
| CYB5R2     | NM_016229    | 30.82207112 | 2.433867593 | 0.00498304  | 12.66382411 |
| ZDHHC16    | NM_198044    | 63.54434729 | 5.448633346 | 0.00011932  | 11.66243776 |
| ATRIP      | NM_001271022 | 126.2511142 | 1.939965076 | 2.58E-14    | 65.07906549 |
| ZNF552     | NM_024762    | 78.82100253 | 0.99349529  | 1.23E-09    | 79.33706717 |
| ZNF324B    | NM_207395    | 71.14516752 | 1.524544305 | 5.09E-08    | 46.66651359 |
| FXR2       | NM_004860    | 38.91669631 | 2.163573905 | 0.001078769 | 17.98722762 |
| SLC16A13   | NM_201566    | 51.72432676 | 3.704427981 | 0.000298768 | 13.96283772 |
| COMMD5     | NM_014066    | 64.95074739 | 2.292863142 | 6.90E-07    | 28.32735466 |
| MIDN       | NM_177401    | 172.4248553 | 25.82952414 | 2.60E-09    | 6.675494848 |
| MSRB1      | NM_016332    | 55.4497221  | 2.287003652 | 1.90E-05    | 24.24557654 |
| MDH2       | NM_001282404 | 89.23462296 | 1.052020431 | 2.65E-10    | 84.82213873 |
| LENG1      | NM_024316    | 62.63175215 | 10.50089604 | 0.000809655 | 5.964419787 |
| PITPNA-AS1 | NR_028514    | 64.53195721 | 10.3299972  | 0.002085251 | 6.247044987 |
| LIAS       | NM_001278591 | 74.45177268 | 0.237771013 | 1.11E-10    | 313.1238406 |
| SDHAP1     | NR_003264    | 73.53917754 | 0.368348871 | 2.62E-10    | 199.6454539 |
| RHNO1      | NM_001257098 | 81.13999777 | 1.244306174 | 1.58E-09    | 65.20902929 |
| PTPN18     | NM_014369    | 94.86022337 | 3.311261313 | 1.22E-08    | 28.6477612  |
| VAMP1      | NM_199245    | 98.24184329 | 3.485297762 | 4.42E-09    | 28.18750363 |
| LETMD1     | NR_045018    | 88.81583277 | 1.098948491 | 5.45E-11    | 80.81892233 |
| C7orf49    | NM_001243751 | 84.86539312 | 9.555319858 | 5.53E-06    | 8.881481141 |
| TRAF4      | NM_004295    | 114.9248986 | 6.920971179 | 9.94E-10    | 16.60531386 |
| PTPN6      | NM_080548    | 103.5236683 | 1.625301528 | 4.56E-12    | 63.69505379 |
| SNX22      | NR_073534    | 75.02059241 | 12.00010965 | 0.000356363 | 6.25165891  |
| CENPM      | NM_024053    | 42.64209165 | 0.805246625 | 5.22E-05    | 52.95531866 |
| SCAMP4     | NM_079834    | 52.6369219  | 0.24437715  | 1.22E-07    | 215.3921584 |
| RPS16      | NM_001020    | 87.75320809 | 5.664552252 | 5.19E-07    | 15.49164068 |
| SYS1       | NM_001099791 | 67.34475741 | 0.595653305 | 1.11E-08    | 113.0603269 |
| POLD2      | NM_001127218 | 63.05054233 | 0.688658086 | 3.94E-08    | 91.55565525 |
| RETSAT     | NM_017750    | 70.72637734 | 3.330034639 | 1.92E-06    | 21.23893142 |
| ATP5J2     | NM_004889    | 84.02781274 | 2.269697226 | 1.01E-08    | 37.02159557 |
| C2CD2L     | NM_001290474 | 56.01854183 | 0.140160611 | 1.08E-08    | 399.6739279 |
| PTGES3     | NM_006601    | 45.5489186  | 1.746507154 | 0.000240883 | 26.02616986 |
| PDCL       | NM_005388    | 31.73466626 | 0.522031569 | 0.001366232 | 60.79070335 |
| SRSF2      | NM_003016    | 146.0907452 | 17.90714873 | 8.85E-09    | 8.158235986 |
| IPO4       | NM_024658    | 66.92596722 | 5.719780517 | 4.81E-05    | 11.70079289 |
| GTF3A      | NM_002097    | 51.2305218  | 0.655811791 | 2.94E-06    | 78.11771994 |
| SH3GL1     | NM_003025    | 62.63175215 | 4.199737795 | 5.86E-05    | 14.91325297 |
| POLDIP3    | NR_103820    | 72.6265824  | 1.378490475 | 3.04E-07    | 52.68558885 |
| NIPSNAP1   | NM_003634    | 25.54024613 | 0.287681114 | 0.001954384 | 88.77971093 |
| RPL14      | NM_003973    | 91.13482802 | 2.371719986 | 8.37E-10    | 38.42562721 |
| PPAPDC1B   | NM_032483    | 105.4238733 | 2.740943285 | 4.64E-11    | 38.46262487 |
| MRPS16     | NM_016065    | 101.1296583 | 5.03301911  | 1.01E-08    | 20.09323948 |
| PDE12      | NM_177966    | 72.55156763 | 2.456463169 | 1.40E-07    | 29.53497066 |
| ERVK13-1   | NR_040023    | 52.21813171 | 4.372053621 | 0.000410379 | 11.94361649 |
| ESPN       | NM_031475    | 160.0360151 | 7.59745746  | 2.75E-13    | 21.06441739 |
| PHLDA3     | NM_012396    | 52.21813171 | 3.416022635 | 0.000235125 | 15.28623704 |
| SLC39A3    | NM_144564    | 36.94147648 | 0.279983867 | 6.09E-05    | 131.9414469 |
| VASP       | NM_003370    | 71.63897248 | 3.25114212  | 3.66E-06    | 22.03501719 |
| POMGNT1    | NM_017739    | 29.8344612  | 0.772446933 | 0.004700193 | 38.623315   |
| MRPL17     | NM_022061    | 93.52883803 | 4.012184034 | 9.95E-09    | 23.31120338 |
| TMC6       | NM_001127198 | 95.35402832 | 0.383637556 | 3.91E-13    | 248.5523816 |
| PHLDA2     | NM_003311    | 142.4403646 | 10.05272393 | 6.44E-09    | 14.16933018 |

|              |              |             |             |             |             |
|--------------|--------------|-------------|-------------|-------------|-------------|
| SERPINE1     | NM_000602    | 43.21091138 | 0.561986272 | 5.22E-05    | 76.88962079 |
| ANGPTL4      | NR_104213    | 158.13581   | 3.379900004 | 1.43E-16    | 46.78712678 |
| EIF2AK1      | NM_014413    | 93.52883803 | 0.632660744 | 6.99E-11    | 147.8341099 |
| YOD1         | NM_001276320 | 27.021661   | 0.168204353 | 0.000291283 | 160.6478102 |
| TCEA2        | NM_003195    | 48.34270683 | 3.722405621 | 0.000488542 | 12.98695299 |
| GRHPR        | NM_012203    | 104.9300684 | 3.756813723 | 3.86E-10    | 27.93060186 |
| CCDC12       | NR_102269    | 50.73671684 | 0.318207244 | 1.55E-06    | 159.4455116 |
| SLC3A2       | NM_001012664 | 87.3344179  | 4.489583931 | 1.84E-07    | 19.45267518 |
| MAVS         | NM_001206491 | 45.94869681 | 2.879007272 | 0.000367418 | 15.95990995 |
| PSMC5        | NM_001199163 | 86.27179322 | 6.229867322 | 3.62E-07    | 13.84809479 |
| MIEN1        | NM_032339    | 70.65136257 | 13.16696012 | 0.002623483 | 5.36580668  |
| TUBA4B       | NR_003063    | 30.32826616 | 0.35786801  | 0.000262316 | 84.74707245 |
| KREMEN2      | NM_024507    | 71.63897248 | 10.93245059 | 0.000381842 | 6.552874114 |
| MED1         | NM_004774    | 45.94869681 | 0.812083017 | 2.51E-05    | 56.58128032 |
| NOM1         | NM_138400    | 50.24291189 | 2.046219768 | 6.20E-05    | 24.5540155  |
| ZNF48        | NM_001214907 | 78.32719757 | 5.34983845  | 1.92E-06    | 14.64103978 |
| RFC4         | NM_002916    | 78.32719757 | 0.292979405 | 1.25E-10    | 267.3471109 |
| RCE1         | NM_005133    | 75.02059241 | 5.882831432 | 1.22E-05    | 12.75246338 |
| B3GAT3       | NR_109991    | 59.74393718 | 2.944906427 | 1.03E-05    | 20.2872107  |
| SIRT3        | NM_012239    | 79.73359767 | 0.512704501 | 5.73E-10    | 155.5156967 |
| ICOSLG       | NM_001283052 | 50.24291189 | 0.208093501 | 5.56E-07    | 241.4439265 |
| RPL19        | NM_000981    | 120.550499  | 8.304837498 | 1.66E-09    | 14.51569631 |
| SNHG20       | NR_027058    | 56.36231725 | 0.490175864 | 6.68E-08    | 114.9838687 |
| METT123      | NM_001206983 | 64.95074739 | 16.03820149 | 0.00261016  | 4.04975255  |
| DAGLB        | NM_139179    | 44.04849175 | 0.220943062 | 8.00E-06    | 199.3658068 |
| WDR6         | NM_018031    | 58.83134203 | 8.396973593 | 0.000847595 | 7.006255454 |
| BLOC1S3      | NM_212550    | 52.21813171 | 3.096173461 | 0.000145699 | 16.86537669 |
| DDB2         | NM_001300734 | 55.03093192 | 0.550393609 | 3.66E-07    | 99.98468554 |
| IER5L        | NM_203434    | 173.2624357 | 17.91872158 | 3.18E-11    | 9.669352523 |
| RBM8A        | NM_005105    | 86.84061295 | 4.130801332 | 5.91E-08    | 21.02270382 |
| CYB561D1     | NM_182580    | 67.83856237 | 0.181160225 | 1.09E-10    | 374.4672007 |
| SNRPD2       | NM_177542    | 47.92391664 | 6.443223212 | 0.001520115 | 7.437879313 |
| KLF6         | NM_001160124 | 51.72432676 | 3.383740353 | 0.000206123 | 15.28613941 |
| GNL3         | NM_014366    | 62.55673738 | 2.823902587 | 6.62E-06    | 22.15258333 |
| MINK1        | NM_153827    | 89.65341315 | 0.127648333 | 4.95E-13    | 702.3469164 |
| EBNA1BP2     | NM_001159936 | 34.62248123 | 0.165370069 | 8.81E-05    | 209.3636502 |
| TXLNA        | NM_175852    | 64.03815225 | 3.912515594 | 3.25E-05    | 16.36751361 |
| CCAR2        | NR_033902    | 52.6369219  | 1.025009475 | 1.45E-05    | 51.35261984 |
| DDIT4        | NM_019058    | 175.087626  | 5.644821953 | 3.31E-16    | 31.01738681 |
| C17orf96     | NM_001130677 | 50.66170207 | 5.252651125 | 0.001128888 | 9.64497753  |
| LOC100652758 | NM_001278082 | 55.4497221  | 6.731726083 | 0.002551246 | 8.237073437 |
| ERF          | NM_006494    | 65.51956712 | 15.95042754 | 0.002701648 | 4.107699745 |
| RDH13        | NR_027382    | 89.23462296 | 4.812941001 | 9.70E-08    | 18.54056032 |
| RPS15        | NM_001018    | 109.2242835 | 5.892165358 | 8.90E-09    | 18.53720607 |
| SMOX         | NM_175841    | 60.23774213 | 0.254930743 | 2.91E-08    | 236.2906158 |
| ALG1         | NM_019109    | 77.83339261 | 0.397281977 | 2.22E-10    | 195.9147332 |
| PHRF1        | NM_001286583 | 52.21813171 | 2.14801448  | 9.13E-05    | 24.3099533  |
| CCDC107      | NM_174923    | 55.37470733 | 9.608606578 | 0.003474663 | 5.763032016 |
| CENPN        | NM_018455    | 62.63175215 | 1.11058779  | 5.90E-07    | 56.39513843 |
| LOC100129518 | NR_037166    | 41.23569155 | 1.786704927 | 0.000911282 | 23.07918388 |
| NDUFAF1      | NM_016013    | 104.3612487 | 2.973695075 | 2.20E-10    | 35.09480495 |
| PDDC1        | NM_182612    | 43.70471634 | 5.362186048 | 0.002493357 | 8.150540832 |
| PTRH2        | NM_016077    | 49.25530197 | 0.722524228 | 7.74E-06    | 68.1711423  |
| MIR22HG      | NR_028505    | 89.72842792 | 7.372096348 | 1.42E-06    | 12.17135855 |
| COPE         | NM_199442    | 79.23979271 | 0.361410356 | 1.26E-10    | 219.2515834 |
| CHRAC1       | NM_017444    | 64.45694244 | 8.554804925 | 0.000176415 | 7.534589391 |
| ASCC2        | NM_001242906 | 85.85300303 | 0.241371218 | 6.17E-12    | 355.6886518 |
| AHNAK2       | NM_138420    | 38.91669631 | 1.690805357 | 0.001255524 | 23.01666253 |
| MAN2C1       | NM_001256496 | 143.3529597 | 5.271678192 | 2.85E-13    | 27.19304072 |
| CEP68        | NM_015147    | 33.63487132 | 1.846018396 | 0.004300506 | 18.22022543 |
| BIRC5        | NM_001012271 | 59.66892241 | 1.821433386 | 1.73E-06    | 32.75932179 |
| D2HGDH       | NM_001287249 | 99.72325817 | 0.921321513 | 3.50E-11    | 108.2393679 |
| RNF181       | NM_016494    | 65.02576216 | 5.316940498 | 3.19E-05    | 12.22992098 |
| PRR13        | NM_018457    | 66.43216226 | 5.861297751 | 8.28E-05    | 11.33403643 |
| ZNF428       | NM_182498    | 61.07532251 | 3.486574956 | 3.73E-05    | 17.51728366 |

|            |              |             |             |             |             |
|------------|--------------|-------------|-------------|-------------|-------------|
| P4HB       | NM_000918    | 116.256284  | 6.150182825 | 8.37E-10    | 18.90289887 |
| TMEM126A   | NM_032273    | 46.93630673 | 0.610586022 | 1.10E-05    | 76.87091588 |
| HES2       | NM_019089    | 78.32719757 | 1.499725989 | 2.26E-08    | 52.22767234 |
| SRSF7      | NM_001031684 | 125.3385191 | 5.24969623  | 2.65E-11    | 23.87538508 |
| HDAC11     | NM_001136041 | 29.90947597 | 0.083072704 | 0.000173336 | 360.0397536 |
| NDUFS3     | NM_004551    | 78.74598776 | 1.97366118  | 3.89E-09    | 39.89843269 |
| EPHX1      | NM_001136018 | 34.12867628 | 0.94693799  | 0.000490296 | 36.04108891 |
| GPX1       | NM_201397    | 82.54639787 | 13.98214972 | 0.000781483 | 5.90369861  |
| PMS2P1     | NR_003613    | 134.4207542 | 0.816749525 | 5.84E-18    | 164.5801437 |
| FIBP       | NM_004214    | 80.22740263 | 0.914669546 | 2.28E-10    | 87.7118988  |
| RAN        | NM_001300796 | 57.00615174 | 1.930515853 | 6.54E-06    | 29.52897365 |
| GRN        | NM_002087    | 47.84890187 | 4.497970342 | 0.000488542 | 10.63788737 |
| DYNLT1     | NM_006519    | 69.73876742 | 0.514223512 | 1.66E-09    | 135.6195619 |
| JMJD6      | NM_015167    | 55.03093192 | 1.514240106 | 3.49E-06    | 36.34227604 |
| CBLC       | NM_001130852 | 61.98791765 | 0.167307235 | 9.55E-10    | 370.5035092 |
| IL17RA     | NM_001289905 | 58.33753707 | 0.99311817  | 7.95E-06    | 58.74178807 |
| YIF1A      | NM_020470    | 37.92908639 | 2.809295356 | 0.00302415  | 13.50128113 |
| TMEM134    | NR_073410    | 90.64102306 | 19.61305164 | 0.000297018 | 4.621464559 |
| DPP9       | NM_139159    | 44.54229671 | 0.49232468  | 1.47E-05    | 90.47341838 |
| DUSP1      | NM_004417    | 151.9413899 | 6.201953076 | 1.32E-13    | 24.49895831 |
| AGTRAP     | NM_001040195 | 45.52990662 | 1.95201413  | 0.000160612 | 23.32457841 |
| SNF8       | NM_007241    | 105.3488586 | 5.785826918 | 8.01E-09    | 18.20809023 |
| COX7C      | NM_001867    | 78.32719757 | 1.187971561 | 1.28E-08    | 65.93356283 |
| USP20      | NM_006676    | 37.92908639 | 0.052455263 | 6.06E-06    | 723.0749499 |
| SLC50A1    | NM_001122837 | 127.6575143 | 16.59125616 | 9.24E-08    | 7.694264564 |
| CILP2      | NM_153221    | 54.11833677 | 2.655062527 | 5.97E-05    | 20.38307431 |
| CDC42EP4   | NM_012121    | 148.1409798 | 2.378062029 | 5.21E-16    | 62.29483417 |
| UPF1       | NM_002911    | 97.32924815 | 1.284979112 | 2.95E-10    | 75.7438368  |
| HEXDC      | NM_173620    | 99.22945321 | 0.850379272 | 6.49E-12    | 116.6884665 |
| COX7A2     | NR_029466    | 65.51956712 | 2.992559634 | 1.78E-06    | 21.89415588 |
| DNASE2     | NM_001375    | 48.83651178 | 3.88076774  | 0.000309389 | 15.58423978 |
| SRSF5      | NM_001039465 | 149.9661701 | 9.986510614 | 1.22E-11    | 15.01687385 |
| DVL2       | NM_004422    | 86.84061295 | 2.708734391 | 1.03E-08    | 32.05947886 |
| ITPRIPL2   | NM_001034841 | 38.42289135 | 1.809799061 | 0.000718549 | 21.23047369 |
| GSTT2      | NM_000854    | 111.0494737 | 7.663898274 | 7.48E-09    | 14.48994621 |
| C1orf53    | NM_001024594 | 54.043322   | 4.73209489  | 0.000258237 | 11.42059136 |
| STYXL1     | NM_016086    | 85.43421284 | 0.372622934 | 3.35E-11    | 229.277924  |
| PNN        | NM_002687    | 84.94040789 | 2.855505728 | 8.00E-09    | 29.74618719 |
| DNAJC9-AS1 | NR_038373    | 78.82100253 | 0.970098494 | 1.02E-08    | 81.2505153  |
| GATSL3     | NM_001037666 | 36.94147648 | 0.946500936 | 0.000153702 | 39.02951923 |
| RPS24      | NM_001142284 | 70.65136257 | 1.156483944 | 3.62E-08    | 61.09152048 |
| MED22      | NM_181491    | 30.82207112 | 1.852967445 | 0.003598386 | 16.63389781 |
| IER5       | NM_016545    | 89.72842792 | 19.85897519 | 0.000925177 | 4.51828088  |
| ABHD14A    | NM_015407    | 76.42699251 | 2.322180915 | 2.85E-08    | 32.91173053 |
| TRAPPC2L   | NM_016209    | 73.53917754 | 0.328086882 | 1.11E-10    | 224.1454368 |
| TADA3      | NM_006354    | 31.2408613  | 0.64187907  | 0.002277106 | 48.67094563 |
| SESN2      | NM_031459    | 125.3385191 | 0.353278245 | 9.84E-18    | 354.7869723 |
| PKMYT1     | NM_182687    | 56.43733202 | 12.50956642 | 0.004669067 | 4.511533822 |
| RAB30-AS1  | NR_038903    | 65.93835731 | 4.734669607 | 4.60E-05    | 13.9267072  |
| NR2C2AP    | NM_176880    | 37.92908639 | 1.843904444 | 0.002272915 | 20.5699848  |
| ATXN2L     | NM_145714    | 49.8241217  | 1.680999883 | 5.78E-05    | 29.63957476 |
| LINC00493  | NR_015432    | 60.65653232 | 3.751423676 | 2.75E-05    | 16.1689368  |
| PRRT3-AS1  | NR_046734    | 30.32826616 | 0.707307412 | 0.001366232 | 42.87847922 |
| MRPL38     | NM_032478    | 58.33753707 | 6.212845942 | 0.000272689 | 9.389825149 |
| LTBR       | NM_002342    | 32.72227618 | 0.339125725 | 0.000495967 | 96.49010324 |
| RPL12      | NM_000976    | 169.4620256 | 25.63092061 | 7.80E-09    | 6.611624615 |
| RAB35      | NM_006861    | 26.52785604 | 0.220254425 | 0.001254282 | 120.4418756 |
| CYB561     | NM_001017916 | 36.94147648 | 1.136870652 | 0.000835115 | 32.49400133 |
| MRPL11     | NM_016050    | 43.62970157 | 3.080335425 | 0.000559153 | 14.16394501 |
| HNRNPK     | NM_031262    | 64.53195721 | 0.792292185 | 5.67E-08    | 81.44969553 |
| LEMD2      | NM_181336    | 80.22740263 | 0.785121906 | 1.27E-09    | 102.1846442 |
| RPL27A     | NM_000990    | 119.6379039 | 20.25958264 | 2.40E-06    | 5.905250174 |
| TSC2       | NM_001114382 | 61.64414223 | 0.125553026 | 1.66E-09    | 490.9809351 |
| TRIM65     | NM_173547    | 93.94762822 | 3.566536279 | 8.93E-09    | 26.34141948 |
| POLR1E     | NM_022490    | 76.8457827  | 0.167123751 | 3.03E-11    | 459.8136535 |

|              |              |             |             |             |             |
|--------------|--------------|-------------|-------------|-------------|-------------|
| FTH1         | NM_002032    | 103.9861748 | 8.371726311 | 6.92E-08    | 12.42111495 |
| MTCH1        | NM_014341    | 84.94040789 | 3.015074039 | 8.49E-08    | 28.17191445 |
| TMEM14C      | NM_016462    | 48.34270683 | 2.507015953 | 0.00026062  | 19.28296738 |
| NOC2L        | NM_015658    | 46.93630673 | 1.746070743 | 0.000148013 | 26.88110256 |
| MRPL20       | NM_017971    | 83.95279797 | 8.891171509 | 1.08E-05    | 9.442265048 |
| CHAMP1       | NM_001164145 | 123.438314  | 0.150576864 | 1.04E-19    | 819.7694576 |
| PTMS         | NM_002824    | 83.60902256 | 5.524321183 | 7.04E-07    | 15.13471425 |
| EMC9         | NM_016049    | 148.1409798 | 10.22763562 | 3.44E-11    | 14.48438185 |
| FAM212B      | NM_019099    | 115.268674  | 2.522685158 | 1.79E-11    | 45.69284982 |
| MRPL24       | NM_145729    | 34.62248123 | 0.713532668 | 0.000283444 | 48.52262946 |
| SLC2A6       | NM_001145099 | 56.43733202 | 2.556768589 | 2.52E-05    | 22.07369578 |
| CDK9         | NM_001261    | 55.52473687 | 1.494065554 | 7.70E-06    | 37.16352118 |
| DHPS         | NM_001930    | 74.0329825  | 5.373921321 | 2.94E-06    | 13.77634284 |
| IVD          | NM_002225    | 33.63487132 | 3.107575422 | 0.004034504 | 10.82350925 |
| INTS6        | NM_001039938 | 100.7108681 | 13.69046439 | 7.04E-06    | 7.356278442 |
| CDCA5        | NM_080668    | 71.63897248 | 3.932301585 | 3.76E-06    | 18.21807685 |
| NUDT18       | NM_024815    | 66.92596722 | 3.508733342 | 6.40E-06    | 19.07411043 |
| DNMT1        | NM_001379    | 49.33031674 | 1.987661957 | 0.000228675 | 24.81826277 |
| POLR2H       | NM_001278715 | 57.84373212 | 5.294708787 | 0.000188104 | 10.92481843 |
| ATP5J2-PTCD1 | NM_001198879 | 84.02781274 | 3.500049778 | 1.09E-07    | 24.00760505 |
| ACTB         | NM_001101    | 144.7593598 | 13.13889264 | 2.59E-10    | 11.01762255 |
| CYBA         | NM_000101    | 110.1368786 | 11.63104074 | 2.03E-07    | 9.469219571 |
| FUT8-AS1     | NR_024334    | 70.23257238 | 8.781391938 | 0.00019648  | 7.997886084 |
| RPL3         | NM_001033853 | 162.3550103 | 12.99108594 | 4.13E-12    | 12.49741639 |
| RPL4         | NM_000968    | 129.9765096 | 3.247778604 | 2.07E-13    | 40.02012619 |
| MOGS         | NM_001146158 | 77.33958766 | 9.462908185 | 3.06E-05    | 8.172919587 |
| C20orf24     | NM_018840    | 63.05054233 | 2.943692726 | 4.51E-06    | 21.41885999 |
| TIRAP        | NM_001039661 | 32.72227618 | 1.126452482 | 0.003598386 | 29.04896273 |
| STARD3       | NM_006804    | 98.16682853 | 0.209867285 | 1.32E-13    | 467.7566993 |
| FAM86HP      | NR_024252    | 56.93113697 | 1.398566249 | 3.60E-06    | 40.70678597 |
| CTSV         | NM_001333    | 77.33958766 | 0.988495778 | 7.93E-10    | 78.23967425 |
| SEMA4B       | NM_198925    | 92.61624289 | 0.780334342 | 1.48E-10    | 118.6878981 |
| FAM86A       | NM_201598    | 66.01337208 | 1.933707904 | 5.61E-07    | 34.13823357 |
| NACA         | NR_045277    | 75.4393826  | 0.190798365 | 3.53E-11    | 395.3879929 |
| CECR5        | NM_033070    | 38.34787658 | 0.323376998 | 3.75E-05    | 118.5856656 |
| ENO1         | NM_001428    | 43.5546868  | 6.385888502 | 0.003405952 | 6.820458388 |
| ZCCHC3       | NM_033089    | 63.54434729 | 10.26251226 | 0.001236689 | 6.191890023 |
| NMT1         | NM_021079    | 95.92284805 | 0.629609779 | 4.25E-12    | 152.352856  |
| TIGD1        | NM_145702    | 114.4310937 | 1.958462154 | 1.53E-12    | 58.42905538 |
| ABCB8        | NM_001282293 | 53.54951704 | 1.255357054 | 1.24E-05    | 42.6568018  |
| SSH3         | NM_017857    | 32.72227618 | 0.915439121 | 0.002277106 | 35.74489599 |
| PTTG1IP      | NM_004339    | 36.52268629 | 1.682376682 | 0.001880619 | 21.70898271 |
| SMIM7        | NM_001300925 | 53.62453181 | 1.98881801  | 3.42E-05    | 26.96301599 |
| STK4-AS1     | NR_038341    | 52.6369219  | 3.034446146 | 9.24E-05    | 17.34646765 |
| POLR2J2      | NM_032959    | 31.80968103 | 0.220024623 | 0.000305449 | 144.5732783 |
| BAIAP2       | NM_006340    | 171.4372454 | 4.726576207 | 4.32E-15    | 36.27091533 |
| TMBIM1       | NM_022152    | 60.65653232 | 1.471685006 | 3.02E-06    | 41.21570313 |
| CS           | NM_004077    | 50.24291189 | 0.685009195 | 1.89E-06    | 73.34633207 |
| PITRM1       | NM_001242307 | 132.5205491 | 0.521444971 | 1.01E-16    | 254.1410051 |
| NDNL2        | NM_138704    | 89.72842792 | 9.439108704 | 1.41E-05    | 9.506027606 |
| GANAB        | NM_198335    | 65.93835731 | 1.227251251 | 6.02E-07    | 53.72849059 |
| PIGY         | NM_001042616 | 97.25423338 | 1.108168528 | 5.16E-11    | 87.76123028 |
| DDX11        | NM_152438    | 48.26769206 | 0.283972201 | 1.16E-06    | 169.9733    |
| RMDN3        | NM_018145    | 26.03405109 | 0.352034655 | 0.001732498 | 73.95309169 |
| EEF2         | NM_001961    | 116.6000594 | 8.622170763 | 2.33E-09    | 13.52328347 |
| PSMC3        | NM_002804    | 84.94040789 | 3.24761514  | 1.03E-08    | 26.15470252 |
| C1orf123     | NM_017887    | 107.7428686 | 3.338779679 | 4.37E-11    | 32.27013429 |
| AHNAK        | NM_001620    | 54.043322   | 0.443347546 | 4.31E-07    | 121.8983222 |
| C22orf29     | NM_024627    | 121.5381089 | 10.85750981 | 4.02E-09    | 11.19392117 |
| UBIAD1       | NM_013319    | 80.72120758 | 0.099009404 | 1.12E-12    | 815.2882881 |
| C14orf119    | NM_017924    | 74.52678745 | 2.061097837 | 1.65E-07    | 36.15878204 |
| SF3B4        | NM_005850    | 91.62863298 | 4.325904122 | 3.78E-08    | 21.18138322 |
| QPCTL        | NM_017659    | 38.84168154 | 2.124479876 | 0.000619057 | 18.28291337 |
| SYVN1        | NM_172230    | 63.96313748 | 12.93130066 | 0.001591795 | 4.946380812 |
| MYO18A       | NM_203318    | 37.01649125 | 2.489740531 | 0.003277181 | 14.86761001 |



|                |              |             |             |             |             |
|----------------|--------------|-------------|-------------|-------------|-------------|
| STRA13         | NM_001271007 | 89.23462296 | 12.06726114 | 1.04E-05    | 7.394770192 |
| RPS7           | NM_001011    | 73.04537258 | 1.572990517 | 1.34E-08    | 46.43726189 |
| XRCC6          | NM_001288978 | 36.02888133 | 0.816573237 | 0.00023846  | 44.12204527 |
| ZC3H10         | NM_032786    | 85.9280178  | 5.678242035 | 2.56E-07    | 15.13285578 |
| LOXL1          | NM_005576    | 50.73671684 | 0.990845428 | 2.94E-05    | 51.20548108 |
| SURF6          | NM_006753    | 73.12038735 | 1.381410433 | 9.12E-09    | 52.93168894 |
| C8orf33        | NM_023080    | 65.51956712 | 1.100503721 | 2.66E-07    | 59.53597961 |
| ATP6V0C        | NM_001694    | 81.21501254 | 6.151893434 | 3.95E-06    | 13.20162864 |
| NLRX1          | NM_024618    | 78.2521828  | 1.099546972 | 4.95E-09    | 71.16765796 |
| FADS3          | NM_021727    | 45.52990662 | 0.158745868 | 3.98E-07    | 286.810027  |
| TMEM256        | NM_152766    | 90.64102306 | 18.53320534 | 0.000993876 | 4.890736458 |
| GAS2L1         | NM_152236    | 61.719157   | 1.739667549 | 1.07E-06    | 35.47755837 |
| RPL36A-HNRNPH2 | NM_001199974 | 44.61731148 | 2.627186367 | 0.00030548  | 16.98292593 |
| CD68           | NM_001040059 | 99.72325817 | 23.11107499 | 0.000354603 | 4.314955414 |
| LOC646903      | NR_036538    | 49.8241217  | 1.864111111 | 5.48E-05    | 26.72808579 |
| DMAP1          | NM_001034024 | 56.43733202 | 1.961879924 | 1.29E-05    | 28.76696546 |
| CDC20          | NM_001255    | 133.4331443 | 12.1397945  | 2.36E-09    | 10.9913841  |
| CTC1           | NR_046431    | 49.8241217  | 1.25803152  | 7.76E-05    | 39.60482778 |
| PSKH1          | NM_006742    | 55.03093192 | 0.453160225 | 5.62E-07    | 121.4381335 |
| CCT4           | NM_006430    | 81.13999777 | 0.491597794 | 4.12E-10    | 165.0536247 |
| PPIL2          | NM_014337    | 77.83339261 | 1.658796454 | 9.33E-08    | 46.92160536 |
| SLC7A6         | NM_003983    | 71.14516752 | 0.239178344 | 3.81E-10    | 297.4565603 |
| ZNF296         | NM_145288    | 88.740818   | 8.363949355 | 2.06E-06    | 10.60991814 |
| PLEKHO2        | NM_001195059 | 73.04537258 | 1.040266345 | 5.14E-08    | 70.21795228 |
| ZNF575         | NM_174945    | 80.72120758 | 6.953749261 | 2.96E-06    | 11.60830001 |
| ATP5E          | NM_006886    | 71.14516752 | 1.660970201 | 1.02E-07    | 42.83350024 |
| MAD2L1BP       | NM_001003690 | 37.43528144 | 1.016563483 | 0.000591444 | 36.82532578 |
| TMEM41A        | NM_080652    | 106.6802439 | 0.624343169 | 6.56E-14    | 170.8679604 |
| C18orf32       | NM_001035005 | 69.73876742 | 0.735278615 | 1.49E-08    | 94.84672342 |
| NDUFS7         | NM_024407    | 96.83544319 | 3.854474878 | 2.33E-09    | 25.12286271 |
| C12orf57       | NM_138425    | 152.853985  | 29.86088179 | 1.66E-06    | 5.118870437 |
| INTS5          | NM_030628    | 125.6822945 | 8.335714066 | 3.60E-10    | 15.07756786 |
| HSP90AA1       | NM_001017963 | 72.6265824  | 1.847482521 | 1.04E-06    | 39.31110663 |
| RHOG           | NM_001665    | 54.61214173 | 1.768538578 | 1.24E-05    | 30.87981365 |
| C19orf52       | NM_138358    | 62.63175215 | 3.6945513   | 4.86E-05    | 16.95246515 |
| CCDC124        | NM_001136203 | 83.04020283 | 0.267770578 | 3.25E-12    | 310.116979  |
| POLM           | NM_001284330 | 82.12760769 | 5.134658629 | 8.53E-07    | 15.99475518 |
| C17orf70       | NR_033338    | 104.3612487 | 0.06606028  | 2.83E-17    | 1579.788155 |
| MYC            | NM_002467    | 92.54122812 | 11.19696441 | 7.74E-06    | 8.264849714 |
| NFKBIE         | NM_004556    | 40.74188659 | 2.864187502 | 0.002493357 | 14.2245878  |
| NASP           | NM_002482    | 124.8447141 | 0.536215653 | 9.79E-16    | 232.8255681 |
| SPG7           | NM_003119    | 121.044304  | 0.919301692 | 3.91E-13    | 131.6698371 |
| DHDH           | NM_014475    | 113.0246936 | 0.979267116 | 4.25E-14    | 115.417634  |
| MCM4           | NM_005914    | 41.72949651 | 1.243418614 | 0.000264422 | 33.56029582 |
| BTG1           | NM_001731    | 116.3312987 | 0.343434827 | 1.84E-16    | 338.728893  |
| GAS6-AS1       | NR_044995    | 63.1255571  | 5.824775919 | 5.69E-05    | 10.83742241 |
| TIGD3          | NM_145719    | 76.92079747 | 7.364787286 | 2.22E-05    | 10.44440178 |
| LLGL2          | NM_001015002 | 113.0246936 | 1.575377693 | 5.61E-12    | 71.74450551 |
| LOC100272217   | NR_027440    | 66.43216226 | 2.893641476 | 2.14E-06    | 22.9579797  |
| PRKRIP1        | NM_024653    | 59.32514699 | 0.615983428 | 1.17E-07    | 96.30964776 |
| C11orf31       | NM_170746    | 95.42904309 | 10.18630768 | 3.00E-06    | 9.368364486 |
| RPS15A         | NM_001019    | 92.96001831 | 2.267153628 | 1.83E-10    | 41.00296388 |
| TRIM47         | NM_033452    | 84.02781274 | 11.65655927 | 3.90E-05    | 7.208629131 |
| CAMK1          | NM_003656    | 57.42494193 | 2.724069276 | 9.57E-06    | 21.08057326 |
| C2orf42        | NM_017880    | 88.32202782 | 1.031552729 | 2.51E-09    | 85.62046839 |
| C21orf2        | NM_001271441 | 40.74188659 | 3.695108324 | 0.003881249 | 11.02589776 |
| RHBDD2         | NM_001040457 | 129.6327341 | 2.388392164 | 1.39E-14    | 54.27615116 |
| UBE2L3         | NR_046082    | 63.1255571  | 0.08737819  | 1.66E-09    | 722.4406589 |
| RPL36A         | NM_021029    | 44.61731148 | 4.920199298 | 0.002477479 | 9.068191912 |
| C9orf114       | NM_016390    | 66.35714749 | 5.172313413 | 5.19E-05    | 12.82929749 |
| ALAD           | NM_000031    | 57.42494193 | 0.523230557 | 5.74E-07    | 109.7507421 |
| PIGO           | NM_032634    | 51.72432676 | 0.965246243 | 2.94E-06    | 53.5866647  |
| SAP30BP        | NM_013260    | 56.43733202 | 0.191279414 | 4.57E-08    | 295.0517823 |
| MCL1           | NM_182763    | 73.53917754 | 4.897887364 | 1.60E-06    | 15.01446891 |
| CHERP          | NM_006387    | 50.16789712 | 1.810197191 | 5.82E-05    | 27.71405091 |

|                |              |             |             |             |             |
|----------------|--------------|-------------|-------------|-------------|-------------|
| SNRPA          | NM_004596    | 40.24808164 | 2.785907275 | 0.000927118 | 14.44702844 |
| C11orf71       | NM_019021    | 65.93835731 | 1.264119539 | 7.28E-08    | 52.16148892 |
| PLEK2          | NM_016445    | 36.02888133 | 0.718400147 | 0.000130614 | 50.15155064 |
| FAM189B        | NM_198264    | 30.82207112 | 0.979784663 | 0.002277106 | 31.45800528 |
| KBTBD4         | NR_024222    | 78.32719757 | 0.456134888 | 3.08E-10    | 171.7193744 |
| SETD6          | NM_001160305 | 75.93318755 | 14.95797159 | 0.000570678 | 5.076436138 |
| PIDD1          | NM_145887    | 39.33548649 | 2.723006674 | 0.001920241 | 14.44560782 |
| AFG3L2         | NM_006796    | 89.23462296 | 0.25218952  | 2.33E-12    | 353.8395364 |
| SPAG5-AS1      | NR_040012    | 129.1389292 | 3.172113475 | 9.74E-13    | 40.71069027 |
| KLF10          | NM_005655    | 70.50133303 | 5.370762046 | 8.03E-06    | 13.12687705 |
| SLC52A2        | NM_001253816 | 126.7449192 | 9.111806497 | 9.93E-10    | 13.90996607 |
| HSBP1          | NM_001537    | 47.35509691 | 1.559077522 | 4.90E-05    | 30.37379236 |
| MRPS25         | NM_022497    | 118.156489  | 0.368660757 | 6.28E-17    | 320.501943  |
| UBE2M          | NM_003969    | 38.76666677 | 1.374339541 | 0.000320077 | 28.20748849 |
| TOMM22         | NM_020243    | 68.33236732 | 3.575096351 | 3.50E-06    | 19.11343377 |
| NEDD8-MDP1     | NM_001199823 | 75.4393826  | 1.063156193 | 2.02E-08    | 70.95794871 |
| HNRNPUL2-BSCL2 | NR_037946    | 63.05054233 | 3.07341069  | 8.12E-06    | 20.51484448 |
| NOSIP          | NM_001270960 | 159.4671953 | 1.040852285 | 5.40E-20    | 153.2082867 |
| ZNF205         | NM_001042428 | 61.22535205 | 0.421819818 | 2.19E-08    | 145.1457456 |
| BRAT1          | NM_152743    | 36.52268629 | 1.185222611 | 0.001159883 | 30.81504349 |
| BLVRB          | NM_000713    | 76.8457827  | 1.939891182 | 3.88E-08    | 39.61345018 |
| PSMD13         | NM_175932    | 64.95074739 | 0.280832693 | 4.94E-09    | 231.2791527 |
| PPP1CC         | NM_001244974 | 93.52883803 | 0.405112596 | 1.85E-12    | 230.871217  |
| NOB1           | NR_074074    | 77.33958766 | 1.334931944 | 6.00E-09    | 57.93522884 |
| ELAC2          | NM_173717    | 68.75115751 | 0.460763223 | 2.43E-09    | 149.2114692 |
| TRPM4          | NM_001195227 | 85.01542266 | 0.015573024 | 4.97E-15    | 5459.146661 |
| RPLP2          | NM_001004    | 90.14721811 | 12.20905259 | 7.55E-06    | 7.383637467 |
| RABIF          | NM_002871    | 84.94040789 | 1.564711743 | 3.77E-10    | 54.28501978 |
| MCAT           | NM_173467    | 95.42904309 | 0.311349554 | 3.78E-14    | 306.5012999 |
| RPL36AL        | NM_001001    | 107.7428686 | 8.066384658 | 7.85E-08    | 13.35702091 |
| TUBA4A         | NM_006000    | 106.7552587 | 14.87437409 | 3.36E-06    | 7.17712611  |
| FDPS           | NM_001135822 | 43.13589661 | 2.180007055 | 0.00030195  | 19.7870445  |
| RABGGTB        | NR_073562    | 88.740818   | 4.093727932 | 8.38E-08    | 21.67726324 |
| PCK2           | NM_001291556 | 72.6265824  | 2.764147667 | 8.43E-07    | 26.27449439 |
| TAF12          | NM_005644    | 138.2211643 | 0.564963208 | 4.60E-17    | 244.6551605 |
| RPS3           | NM_001260506 | 147.6471748 | 3.656354648 | 3.48E-15    | 40.3809775  |
| ARL6IP1        | NM_015161    | 117.2438939 | 0.095589285 | 2.24E-19    | 1226.538038 |
| TMEM256-PLSCR3 | NR_037719    | 90.64102306 | 12.6273692  | 9.68E-06    | 7.178139931 |
| RIC8A          | NM_021932    | 60.23774213 | 10.48472681 | 0.000897501 | 5.745284853 |
| CTU1           | NM_145232    | 35.53507638 | 0.395431107 | 0.000404795 | 89.86414009 |
| SLC25A21-AS1   | NR_033240    | 66.92596722 | 13.11150034 | 0.002761164 | 5.10437139  |
| TMEM249        | NM_001252404 | 80.22740263 | 4.006425632 | 2.10E-06    | 20.02468285 |
| FLJ31104       | NR_102755    | 80.22740263 | 1.086909789 | 2.71E-09    | 73.81238391 |
| ALAS1          | NM_000688    | 134.3457394 | 0.47996631  | 3.26E-19    | 279.906603  |
| HOXB6          | NM_018952    | 38.42289135 | 2.672283943 | 0.001306691 | 14.37829668 |
| ARF4           | NM_001660    | 97.17921861 | 0.142567249 | 3.05E-14    | 681.6377474 |
| VHL            | NM_000551    | 83.04020283 | 1.378257196 | 7.75E-10    | 60.25015002 |
| RFC5           | NM_001206801 | 39.82929145 | 0.140711225 | 1.95E-06    | 283.0569582 |
| NELFB          | NM_015456    | 60.23774213 | 3.573948974 | 5.75E-05    | 16.85467324 |
| MSTO2P         | NR_024117    | 110.4056392 | 11.67908978 | 2.21E-07    | 9.453274298 |
| COQ10A         | NM_144576    | 101.5484485 | 5.195290873 | 6.48E-09    | 19.54624889 |
| WBSCR22        | NM_001202560 | 80.22740263 | 1.096527887 | 1.95E-09    | 73.16494505 |
| LSM10          | NM_032881    | 95.84783328 | 1.468119557 | 1.26E-11    | 65.28612251 |
| MRM1           | NM_024864    | 67.7635476  | 3.76504853  | 1.88E-06    | 17.99805422 |
| CDH24          | NM_022478    | 56.43733202 | 1.035065907 | 1.18E-06    | 54.52535114 |
| BET1L          | NM_016526    | 78.32719757 | 8.226671745 | 2.65E-05    | 9.521128349 |
| CDK5RAP3       | NM_001278216 | 30.74705635 | 0.666074667 | 0.001991318 | 46.16157596 |
| CEBPZOS        | NR_037880    | 71.07015275 | 1.396116842 | 8.89E-08    | 50.90559087 |
| CHCHD5         | NM_032309    | 38.91669631 | 3.993722353 | 0.00204743  | 9.744467158 |
| ZFP41          | NM_001271156 | 71.71398725 | 5.063228217 | 6.57E-06    | 14.16368849 |
| EIF4A3         | NM_014740    | 204.0845068 | 1.752577236 | 2.86E-25    | 116.4482242 |
| CSPG4          | NM_001897    | 48.34270683 | 0.463625492 | 4.07E-06    | 104.2710283 |
| SLC10A3        | NM_001142391 | 111.6182935 | 5.970158306 | 1.56E-09    | 18.69603581 |
| CD99           | NM_002414    | 29.41567102 | 0.489386167 | 0.001906718 | 60.10727933 |
| NISCH          | NM_007184    | 43.70471634 | 0.686419645 | 3.72E-05    | 63.67055002 |

|              |              |             |             |             |             |
|--------------|--------------|-------------|-------------|-------------|-------------|
| TMEM198B     | NR_036477    | 56.93113697 | 7.491383003 | 0.00110666  | 7.599549636 |
| ZNF687       | NM_020832    | 53.62453181 | 4.297987026 | 0.00014062  | 12.47666209 |
| SELK         | NM_021237    | 57.91874689 | 2.420959377 | 1.67E-05    | 23.92388217 |
| ATF4         | NM_182810    | 150.95378   | 34.49585918 | 7.03E-06    | 4.375997106 |
| BUD31        | NM_003910    | 106.7552587 | 6.273492288 | 4.54E-09    | 17.01687892 |
| COA4         | NM_016565    | 68.82617228 | 1.277534638 | 2.69E-08    | 53.87421228 |
| SRRT         | NM_015908    | 73.12038735 | 4.222632877 | 1.55E-06    | 17.31630229 |
| REEP4        | NM_025232    | 62.13794719 | 6.918444144 | 0.000140753 | 8.981491489 |
| SH2D3A       | NM_005490    | 64.53195721 | 2.019687634 | 7.38E-07    | 31.95145434 |
| KCTD13       | NM_178863    | 39.75427668 | 2.881696267 | 0.001133804 | 13.79544303 |
| MED26        | NM_004831    | 53.13072686 | 0.305095511 | 5.62E-07    | 174.1445708 |
| TBCB         | NM_001281    | 29.41567102 | 0.280717961 | 0.000265346 | 104.7872779 |
| RPL38        | NM_001035258 | 75.85817278 | 7.613487014 | 1.13E-05    | 9.963656948 |
| COPS6        | NM_006833    | 68.33236732 | 7.034393157 | 8.38E-05    | 9.714038695 |
| ATG16L2      | NM_033388    | 82.54639787 | 4.184226701 | 2.19E-07    | 19.72799367 |
| TRMT12       | NM_017956    | 35.04127142 | 0.570306057 | 0.000495967 | 61.44292353 |
| RRP7A        | NM_015703    | 59.74393718 | 7.569855315 | 0.000296964 | 7.892348624 |
| SQSTM1       | NM_003900    | 142.78414   | 8.538816486 | 2.28E-11    | 16.72177172 |
| NT5C         | NM_001252377 | 91.55361821 | 22.64564048 | 0.001393868 | 4.042880496 |
| VCP          | NM_007126    | 80.64619281 | 1.999604491 | 1.55E-08    | 40.33107206 |
| RUVBL2       | NM_006666    | 40.32309641 | 1.425757018 | 0.000774874 | 28.28188528 |
| EIF4A2       | NM_001967    | 136.2459445 | 11.26879527 | 2.49E-10    | 12.09055104 |
| GAPDH        | NM_001289745 | 151.9413899 | 36.20910749 | 3.49E-06    | 4.196220244 |
| NPLOC4       | NM_017921    | 127.7325291 | 0.101403079 | 1.09E-19    | 1259.651384 |
| NDOR1        | NM_001144026 | 73.53917754 | 4.376770671 | 1.68E-06    | 16.80215462 |
| PPP2R5D      | NM_001270476 | 68.82617228 | 1.731692577 | 7.73E-07    | 39.74502935 |
| UQCRC1       | NM_003365    | 77.83339261 | 1.137970115 | 2.00E-09    | 68.39669299 |
| EFNA3        | NM_004952    | 89.72842792 | 10.9778995  | 8.94E-06    | 8.173551594 |
| CRAT         | NM_001257363 | 42.1482867  | 0.245985802 | 1.93E-06    | 171.3443882 |
| ECSIT        | NM_001142464 | 27.44045119 | 0.026009895 | 9.13E-05    | 1055.000456 |
| BAG3         | NM_004281    | 101.5484485 | 0.98905956  | 7.48E-12    | 102.6717222 |
| CBY1         | NM_015373    | 51.2305218  | 1.517179133 | 3.11E-05    | 33.7669565  |
| GMPPA        | NM_013335    | 59.25013222 | 0.393622034 | 2.19E-08    | 150.5254462 |
| C4orf3       | NM_001001701 | 33.21608113 | 0.735294778 | 0.000283444 | 45.1738298  |
| C5orf45      | NM_001017987 | 101.4734337 | 4.077651567 | 2.71E-09    | 24.88526349 |
| BCAT2        | NM_001190    | 109.6430736 | 2.591668285 | 7.61E-11    | 42.30598271 |
| DGCR6L       | NM_033257    | 101.6234632 | 2.113453706 | 2.68E-11    | 48.08407345 |
| SLC35E2      | NM_182838    | 37.36026667 | 1.741199067 | 0.001625779 | 21.45663145 |
| BANF1        | NM_003860    | 98.73564825 | 16.83330135 | 5.16E-05    | 5.8654952   |
| TRA2A        | NM_001282758 | 114.3560789 | 0.588416945 | 2.06E-14    | 194.3453189 |
| LDLR         | NM_001195799 | 39.82929145 | 1.956011592 | 0.001373141 | 20.36250277 |
| ZFAS1        | NR_036659    | 121.9568991 | 12.61807085 | 3.56E-08    | 9.665257121 |
| LINC00659    | NR_046224    | 80.22740263 | 8.927033703 | 1.68E-05    | 8.987016886 |
| FASTK        | NM_001258461 | 81.13999777 | 9.928734716 | 1.62E-05    | 8.172239474 |
| MTFP1        | NM_016498    | 33.70988609 | 2.173048095 | 0.00377678  | 15.51271975 |
| PRR23D1      | NM_001282479 | 27.93425614 | 0.220512206 | 0.000779209 | 126.6789567 |
| WDR24        | NM_032259    | 86.34680799 | 6.232892579 | 7.77E-07    | 13.85340865 |
| ELL3         | NM_025165    | 65.51956712 | 15.123885   | 0.004484833 | 4.332191572 |
| IRF5         | NM_001242452 | 45.03610167 | 2.176979297 | 0.000148013 | 20.68742763 |
| RHOB         | NM_004040    | 116.256284  | 12.22738278 | 1.97E-07    | 9.507863298 |
| ITPR3        | NM_002224    | 29.41567102 | 0.449796739 | 0.002278863 | 65.39769743 |
| HINT1        | NM_005340    | 113.9372887 | 0.593889219 | 1.84E-16    | 191.8493973 |
| RABEP2       | NM_024816    | 29.41567102 | 0.576876109 | 0.001133804 | 50.99131436 |
| E2F4         | NM_001950    | 67.34475741 | 3.474670049 | 1.21E-06    | 19.38162659 |
| LDB1         | NM_001113407 | 47.43011168 | 3.806666572 | 0.00064253  | 12.45974944 |
| LOC100507501 | NR_039999    | 124.8447141 | 2.986434067 | 3.24E-13    | 41.80394119 |
| POLR2D       | NM_004805    | 116.7500889 | 1.294437456 | 7.11E-14    | 90.19368871 |
| ZNF335       | NM_022095    | 62.63175215 | 3.310918674 | 5.96E-06    | 18.91672926 |
| EID2         | NM_153232    | 81.13999777 | 2.841445259 | 1.40E-06    | 28.55588983 |
| ESRRA        | NM_001282450 | 41.72949651 | 5.370902923 | 0.002543845 | 7.769549572 |
| TMEM52       | NM_178545    | 74.94557764 | 6.260854336 | 3.06E-05    | 11.97050332 |
| TNFRSF12A    | NM_016639    | 177.6316655 | 36.343602   | 2.52E-07    | 4.887563582 |
| HNRNPF       | NM_001098207 | 43.13589661 | 2.54185446  | 0.000348152 | 16.97024644 |
| TSTD1        | NM_001113205 | 65.44455235 | 10.01533046 | 0.001182593 | 6.534437639 |
| CHKB-CPT1B   | NR_027928    | 43.62970157 | 2.717666403 | 0.000441324 | 16.05410492 |

|             |              |             |             |             |             |
|-------------|--------------|-------------|-------------|-------------|-------------|
| RPP38       | NM_006414    | 105.8426635 | 7.696937145 | 1.34E-08    | 13.75127035 |
| ILF3-AS1    | NR_024333    | 71.71398725 | 3.595042817 | 2.19E-06    | 19.94802034 |
| CDC42EP1    | NM_152243    | 34.12867628 | 2.84817613  | 0.002810025 | 11.98264248 |
| POLR1C      | NM_203290    | 75.4393826  | 6.972515533 | 1.03E-05    | 10.81953597 |
| EDC4        | NM_014329    | 84.94040789 | 1.244485358 | 1.92E-10    | 68.25344094 |
| PSME3       | NM_005789    | 75.4393826  | 2.331909596 | 2.92E-07    | 32.35090362 |
| PMAIP1      | NM_021127    | 99.72325817 | 5.543414238 | 2.05E-08    | 17.9895014  |
| HSPD1       | NM_002156    | 120.1317088 | 3.409014031 | 3.78E-12    | 35.23942928 |
| PTGES2-AS1  | NR_024425    | 80.72120758 | 1.128405096 | 9.63E-09    | 71.53566378 |
| HMGCL       | NM_000191    | 85.9280178  | 0.195913521 | 4.96E-12    | 438.6017729 |
| PIM2        | NM_006875    | 56.93113697 | 2.193149472 | 9.53E-06    | 25.95862148 |
| ACTG1       | NM_001614    | 190.8580862 | 32.64909619 | 2.71E-09    | 5.845738733 |
| PNRC1       | NM_006813    | 93.52883803 | 7.545838509 | 2.81E-07    | 12.39475744 |
| UBA1        | NM_003334    | 58.9063568  | 2.362742983 | 7.55E-06    | 24.93134346 |
| NCDN        | NM_014284    | 88.740818   | 2.637767452 | 3.86E-09    | 33.64239631 |
| MTA2        | NM_004739    | 53.13072686 | 0.277361365 | 9.21E-08    | 191.5577785 |
| NDST2       | NM_003635    | 135.7521395 | 2.132010633 | 4.86E-16    | 63.67329384 |
| LGALS1      | NM_002305    | 95.35402832 | 14.08775537 | 1.20E-05    | 6.768574968 |
| NOP9        | NM_174913    | 36.94147648 | 0.843192689 | 0.000393885 | 43.81142884 |
| ECI1        | NM_001178029 | 52.14311694 | 3.766175253 | 0.000298923 | 13.84511167 |
| SIRT7       | NM_016538    | 71.14516752 | 5.243487307 | 5.88E-06    | 13.56829212 |
| PABPC1      | NM_002568    | 120.0566941 | 2.046870619 | 2.20E-13    | 58.6537776  |
| USP3-AS1    | NR_034080    | 86.91562772 | 1.519306537 | 5.45E-10    | 57.20743354 |
| KRTCAP3     | NM_173853    | 53.62453181 | 9.885714146 | 0.004717712 | 5.424446936 |
| NCBP2-AS2   | NR_024388    | 51.2305218  | 2.478755018 | 0.000308199 | 20.66784391 |
| RPUSD1      | NM_058192    | 70.72637734 | 6.205026571 | 9.00E-06    | 11.39823924 |
| AMIGO3      | NM_198722    | 73.12038735 | 12.9789756  | 0.000432395 | 5.633756438 |
| TCF25       | NM_014972    | 148.6347847 | 2.679787857 | 2.88E-15    | 55.46513106 |
| DPH2        | NM_001384    | 31.80968103 | 0.384437943 | 0.000264898 | 82.74334422 |
| ZFP36L2     | NM_006887    | 99.22945321 | 1.622862621 | 4.44E-12    | 61.14470316 |
| GPC2        | NM_152742    | 56.51234679 | 1.02598107  | 5.74E-07    | 55.08127631 |
| SDC4        | NM_002999    | 81.7088175  | 1.568148779 | 8.70E-09    | 52.10527127 |
| PPM1F       | NM_014634    | 54.11833677 | 0.202548081 | 9.21E-08    | 267.1876049 |
| RNASEH1-AS1 | NR_038429    | 40.74188659 | 1.650790623 | 0.000436662 | 24.68022657 |
| SREBF1      | NM_004176    | 75.4393826  | 4.985670317 | 3.95E-06    | 15.1312417  |
| NUMA1       | NR_104476    | 60.73154709 | 0.198589764 | 7.90E-08    | 305.8140859 |
| PSMD9       | NR_048555    | 45.03610167 | 0.260770101 | 2.44E-06    | 172.7042385 |
| ZDHHC12     | NM_032799    | 89.65341315 | 5.687809203 | 2.34E-07    | 15.76238055 |
| PHB2        | NM_001144831 | 70.23257238 | 13.44850124 | 0.000658421 | 5.222334527 |
| UQC2        | NM_032340    | 67.34475741 | 1.669909758 | 2.27E-07    | 40.32838127 |
| RANGAP1     | NM_002883    | 68.75115751 | 0.658215474 | 2.09E-08    | 104.4508376 |
| TPT1        | NM_001286273 | 99.15443844 | 15.05556361 | 1.09E-05    | 6.585900138 |
| XRCC3       | NM_001100118 | 65.02576216 | 9.232464971 | 0.000440345 | 7.043163702 |
| C19orf40    | NM_152266    | 29.8344612  | 0.321693003 | 0.001384178 | 92.74202701 |
| RPS5        | NM_001009    | 87.3344179  | 6.187641749 | 7.08E-07    | 14.11433005 |
| PFKL        | NM_002626    | 28.50307587 | 0.280911398 | 0.000776927 | 101.4664269 |
| CCNL1       | NM_020307    | 106.8302734 | 4.37685646  | 4.22E-10    | 24.40799108 |
| RPUSD3      | NM_001142547 | 75.93318755 | 4.61552269  | 9.53E-07    | 16.45169847 |
| HSD17B10    | NM_004493    | 33.21608113 | 0.529648855 | 8.81E-05    | 62.71340117 |
| ANKRD54     | NM_138797    | 73.12038735 | 2.444464986 | 7.68E-08    | 29.91263437 |
| GNB2        | NM_005273    | 38.84168154 | 4.749542704 | 0.002791221 | 8.177983431 |
| STX5        | NM_001244666 | 74.94557764 | 1.999063388 | 1.87E-07    | 37.49034577 |
| PRSS8       | NM_002773    | 37.92908639 | 3.949342538 | 0.003985537 | 9.603898883 |
| AKAP8L      | NM_001291478 | 36.94147648 | 0.969135447 | 0.000252808 | 38.11797061 |
| GTPBP8      | NM_138485    | 97.82305311 | 1.213723148 | 2.30E-11    | 80.59750137 |
| FAM171A2    | NM_198475    | 56.51234679 | 0.376852758 | 1.18E-07    | 149.9586921 |
| TMEM179B    | NM_199337    | 101.0546435 | 11.6457563  | 2.74E-06    | 8.677379203 |
| HSPA5       | NM_005347    | 116.3312987 | 2.608514603 | 8.85E-13    | 44.59675963 |
| MRPL27      | NM_016504    | 81.55878796 | 3.769639566 | 7.73E-08    | 21.63569926 |
| B3GNT3      | NM_014256    | 34.62248123 | 0.116809828 | 1.84E-05    | 296.4004137 |
| ZC3HAV1L    | NM_080660    | 49.8241217  | 0.734913489 | 7.74E-06    | 67.79590041 |
| MAFF        | NM_012323    | 33.63487132 | 3.148137857 | 0.003922071 | 10.68405287 |
| PNMA1       | NM_006029    | 73.46416277 | 3.885979261 | 2.52E-06    | 18.90492919 |
| BCDIN3D     | NM_181708    | 93.52883803 | 1.751535245 | 5.96E-11    | 53.39820496 |
| LINC00941   | NR_040245    | 43.62970157 | 2.356767917 | 0.000895718 | 18.51251507 |

|               |              |             |             |             |             |
|---------------|--------------|-------------|-------------|-------------|-------------|
| E4F1          | NM_001288776 | 57.84373212 | 10.44618537 | 0.002047936 | 5.537306689 |
| LINC01273     | NR_109943    | 35.61009115 | 1.194298149 | 0.000538187 | 29.81675152 |
| EPPK1         | NM_031308    | 35.11628619 | 0.445371527 | 8.06E-05    | 78.84717374 |
| LZTS3         | NM_001282533 | 37.01649125 | 0.480986048 | 0.000209145 | 76.95959457 |
| CUL7          | NM_014780    | 118.2315038 | 2.11989027  | 3.16E-12    | 55.77246401 |
| CRK           | NM_005206    | 106.4114833 | 1.923283891 | 7.72E-11    | 55.3280167  |
| TDG           | NM_003211    | 81.63380273 | 0.026039489 | 1.64E-14    | 3135.000203 |
| FAM53C        | NM_016605    | 108.2366735 | 3.646347223 | 8.20E-11    | 29.68358933 |
| FAM46B        | NM_052943    | 91.55361821 | 6.676918948 | 4.46E-07    | 13.71195591 |
| CNP           | NM_033133    | 90.14721811 | 8.225838637 | 1.21E-06    | 10.95903069 |
| PSME2         | NM_002818    | 64.11316702 | 5.49832195  | 6.43E-05    | 11.66049707 |
| RAB3A         | NM_002866    | 71.22018229 | 1.619037303 | 8.89E-08    | 43.9892164  |
| POM121        | NM_001257190 | 43.5546868  | 0.823476751 | 7.62E-05    | 52.89121612 |
| CHTF18        | NM_022092    | 42.22330147 | 4.451480312 | 0.002141854 | 9.485227051 |
| CDC42SE1      | NM_020239    | 56.93113697 | 2.711291353 | 3.18E-05    | 20.99779388 |
| RNPS1         | NM_001286627 | 53.54951704 | 2.468709084 | 2.28E-05    | 21.69130312 |
| INCA1         | NM_001167987 | 34.12867628 | 0.328392493 | 0.000283444 | 103.9264812 |
| PMF1          | NM_001199654 | 40.74188659 | 0.151644719 | 5.61E-06    | 268.6667018 |
| LOC100507419  | NR_123723    | 46.51751654 | 0.388082763 | 4.54E-06    | 119.8649386 |
| VPS9D1        | NM_004913    | 151.3725702 | 10.53931456 | 1.61E-11    | 14.36265796 |
| CSNK1D        | NR_110578    | 79.31480748 | 4.081070919 | 1.10E-06    | 19.43480254 |
| SNRPG         | NM_003096    | 76.35197774 | 0.222521789 | 3.03E-11    | 343.1213555 |
| LAMTOR1       | NM_017907    | 49.33031674 | 3.650624171 | 0.000276933 | 13.5128445  |
| C21orf119     | NR_026845    | 80.22740263 | 15.84020905 | 0.003361396 | 5.064794432 |
| GAS5          | NR_002578    | 158.5546002 | 7.860471262 | 1.27E-13    | 20.17113159 |
| NAPA-AS1      | NR_038452    | 52.71193667 | 0.832913588 | 1.14E-05    | 63.28620089 |
| HAUS8         | NM_001011699 | 36.02888133 | 0.089230927 | 6.06E-06    | 403.7712339 |
| ZFHX2         | NM_033400    | 27.44045119 | 1.026064048 | 0.002188157 | 26.74340967 |
| SRSF6         | NR_034009    | 160.0360151 | 3.993818495 | 2.27E-16    | 40.07092842 |
| TXN           | NM_003329    | 86.42182276 | 0.727143675 | 3.83E-11    | 118.851096  |
| SRSF8         | NM_032102    | 50.81173161 | 5.75429022  | 0.000594909 | 8.830234429 |
| PSPH          | NM_004577    | 83.04020283 | 0.082990754 | 1.75E-13    | 1000.595834 |
| JMJD7-PLA2G4B | NM_001198588 | 101.0546435 | 1.382949441 | 2.14E-11    | 73.07182784 |
| RBCK1         | NM_031229    | 50.81173161 | 1.381206131 | 3.92E-05    | 36.78794243 |
| TACC3         | NM_006342    | 44.61731148 | 1.757439557 | 0.000231857 | 25.38767909 |
| SNAI2         | NM_003068    | 33.63487132 | 0.281365786 | 8.81E-05    | 119.5414403 |
| IBA57-AS1     | NR_103540    | 57.91874689 | 2.11583896  | 2.67E-05    | 27.37389186 |
| PDXP          | NM_020315    | 42.71710642 | 0.620708393 | 2.98E-05    | 68.81992721 |
| UBALD1        | NM_145253    | 41.72949651 | 0.204937975 | 3.11E-06    | 203.6201267 |
| COX4I1        | NM_001861    | 48.68648224 | 2.226057621 | 0.000191558 | 21.87116892 |
| ALG12         | NM_024105    | 30.25325139 | 0.87921273  | 0.003598386 | 34.40947833 |
| PHLDA1        | NM_007350    | 50.73671684 | 4.152667233 | 0.000165164 | 12.2178624  |
| RELL2         | NM_173828    | 50.73671684 | 1.783335222 | 1.94E-05    | 28.45046529 |
| RPLP0         | NM_053275    | 129.6327341 | 19.43712418 | 4.50E-07    | 6.669337139 |
| SLC16A5       | NM_004695    | 101.5484485 | 1.493030643 | 8.79E-12    | 68.01497943 |
| ZNF394        | NM_032164    | 65.86334254 | 0.196866779 | 3.51E-10    | 334.5579317 |
| TRIP10        | NM_001288963 | 58.41255184 | 2.997897203 | 5.86E-05    | 19.48450794 |
| POMZP3        | NM_152992    | 134.7645296 | 2.376458042 | 3.92E-14    | 56.708146   |
| SYCE2         | NM_001105578 | 43.62970157 | 2.064000312 | 0.000468928 | 21.13841811 |
| FAM161B       | NM_152445    | 39.33548649 | 0.148720728 | 3.51E-06    | 264.4922937 |
| FKBP1A-SDCBP2 | NR_037661    | 62.63175215 | 0.657967007 | 3.80E-07    | 95.18980653 |
| BMP8B         | NM_001720    | 63.61936206 | 1.468076746 | 3.11E-06    | 43.33517457 |
| MIP           | NM_021933    | 63.1255571  | 1.690953777 | 8.18E-07    | 37.33133215 |
| ITPR1-AS1     | NR_108075    | 32.22847122 | 0.43994587  | 0.000264898 | 73.25553754 |
| IFRD2         | NM_006764    | 29.41567102 | 0.960332292 | 0.002737739 | 30.63072154 |
| PTMA          | NM_002823    | 114.9248986 | 23.18489065 | 1.28E-05    | 4.956887672 |
| DPP7          | NM_013379    | 56.01854183 | 4.779044583 | 0.000104785 | 11.72170313 |
| AGAP11        | NM_133447    | 46.51751654 | 0.100270371 | 6.63E-07    | 463.9208576 |
| PMPCA         | NM_015160    | 66.85095245 | 1.029016439 | 1.10E-07    | 64.9658741  |
| SMG8          | NM_018149    | 77.75837784 | 0.521237528 | 3.08E-10    | 149.1803134 |
| ALDH16A1      | NM_153329    | 100.6358533 | 1.384235835 | 1.36E-11    | 72.70137847 |
| GLI4          | NM_138465    | 85.85300303 | 21.12851334 | 0.000609574 | 4.063371694 |
| MST1R         | NM_002447    | 142.0215744 | 4.01885173  | 3.43E-14    | 35.33884402 |
| UQCR10        | NM_013387    | 53.13072686 | 1.959705091 | 1.99E-05    | 27.11159302 |
| MEF2BNC       | NM_001145784 | 47.84890187 | 4.675323487 | 0.000832801 | 10.23435106 |

|             |              |             |             |             |             |
|-------------|--------------|-------------|-------------|-------------|-------------|
| TRIM52      | NM_032765    | 90.22223287 | 2.395497276 | 8.37E-10    | 37.66325839 |
| PRELID1     | NM_001271828 | 132.0267442 | 9.050741361 | 4.12E-10    | 14.58739554 |
| ZNF581      | NM_016535    | 55.52473687 | 7.73350532  | 0.001354406 | 7.179763196 |
| LAMTOR4     | NM_001008395 | 51.72432676 | 6.411026946 | 0.000857294 | 8.068025169 |
| TMEM189     | NM_001162505 | 91.62863298 | 3.518115498 | 6.40E-08    | 26.04480525 |
| PAXIP1-AS1  | NR_028090    | 45.52990662 | 6.347760299 | 0.003909354 | 7.172593872 |
| RHOV        | NM_133639    | 72.13277744 | 4.422301632 | 4.44E-06    | 16.31113918 |
| NDUFA7      | NM_005001    | 73.95796773 | 4.840436983 | 5.96E-06    | 15.27919235 |
| RBM4B       | NM_001286135 | 56.93113697 | 3.522513755 | 7.74E-05    | 16.16207655 |
| PNPLA6      | NM_001166112 | 42.22330147 | 1.682681693 | 0.0005095   | 25.09286316 |
| KDM4A-AS1   | NR_033827    | 74.94557764 | 3.39797822  | 3.22E-07    | 22.05593232 |
| PAGR1       | NM_024516    | 62.06293242 | 11.82977003 | 0.001358527 | 5.246334651 |
| EXOSC4      | NM_019037    | 88.66580323 | 3.334094926 | 3.78E-08    | 26.59366491 |
| H2AFZ       | NM_002106    | 111.6182935 | 12.24820174 | 7.11E-07    | 9.113035193 |
| HNRNPA1     | NM_002136    | 124.3509092 | 9.326494347 | 6.75E-10    | 13.33308149 |
| ATG4B       | NM_178326    | 27.36543642 | 0.634693798 | 0.001858696 | 43.1159663  |
| APEH        | NM_001640    | 47.43011168 | 6.857863903 | 0.002717413 | 6.916164035 |
| C16orf71    | NM_139170    | 39.82929145 | 0.618284584 | 0.000191558 | 64.41902721 |
| TMEM115     | NM_007024    | 59.81895195 | 4.147808924 | 4.45E-05    | 14.42181958 |
| EIF4A1      | NM_001204510 | 68.82617228 | 16.16918413 | 0.003435344 | 4.256626168 |
| RPUSD2      | NM_152260    | 58.83134203 | 1.130101966 | 8.18E-07    | 52.05843704 |
| GSG2        | NM_031965    | 55.94352706 | 3.50913826  | 0.000105459 | 15.94224077 |
| SH3D21      | NM_001162530 | 42.22330147 | 4.301714615 | 0.002719545 | 9.815458542 |
| POLR2L      | NM_021128    | 90.22223287 | 20.08041003 | 0.000324454 | 4.49304734  |
| RPS2        | NM_002952    | 186.5638711 | 41.98322291 | 2.23E-07    | 4.443772016 |
| RSAD1       | NM_018346    | 133.2831147 | 1.011730675 | 3.12E-17    | 131.7377421 |
| RRP1        | NM_003683    | 64.03815225 | 0.067319261 | 1.09E-09    | 951.2604789 |
| PEX11G      | NM_001270539 | 59.74393718 | 1.833613104 | 2.08E-06    | 32.58262991 |
| DGCR14      | NM_022719    | 54.043322   | 0.056942704 | 2.37E-09    | 949.0824697 |
| KANSL2      | NM_017822    | 150.0411848 | 0.272585495 | 4.02E-22    | 550.4371573 |
| PIEL        | NR_003929    | 59.81895195 | 0.386344432 | 6.76E-08    | 154.8332189 |
| TRNP1       | NM_001013642 | 125.4135338 | 17.08130836 | 1.93E-07    | 7.34215033  |
| GRPEL2      | NM_152407    | 82.54639787 | 1.056737813 | 1.07E-10    | 78.11435996 |
| CHD4        | NM_001273    | 72.13277744 | 0.543516939 | 4.02E-09    | 132.7148656 |
| DYNLL2      | NM_080677    | 77.41460243 | 3.114616966 | 7.98E-08    | 24.85525613 |
| TOB1        | NM_005749    | 188.9578811 | 9.723644263 | 1.12E-15    | 19.43282539 |
| HTR7P1      | NR_002774    | 141.5277694 | 7.930536027 | 2.23E-12    | 17.84592731 |
| ACTN4       | NM_004924    | 103.5236683 | 0.300883689 | 3.61E-13    | 344.0654051 |
| SMARCD2     | NM_001098426 | 66.85095245 | 7.385916883 | 8.05E-05    | 9.051137931 |
| TMEM145     | NM_173633    | 27.51546596 | 0.449897745 | 0.000468867 | 61.15937731 |
| STOML2      | NM_001287033 | 67.83856237 | 1.400030628 | 9.80E-08    | 48.45505591 |
| COQ4        | NM_016035    | 75.93318755 | 0.425298632 | 1.25E-10    | 178.5408696 |
| AMDHD2      | NM_015944    | 30.40328093 | 2.200997425 | 0.00498304  | 13.8134105  |
| SNHG15      | NR_003697    | 119.0690842 | 6.883611873 | 3.53E-10    | 17.29747208 |
| DNAJC9      | NM_015190    | 95.35402832 | 3.526350482 | 6.08E-09    | 27.04042857 |
| MRPS22      | NM_020191    | 59.25013222 | 0.46277839  | 1.08E-07    | 128.0313288 |
| IRGQ        | NM_001007561 | 36.94147648 | 1.032242248 | 0.000655852 | 35.78760367 |
| COG8        | NM_032382    | 68.82617228 | 13.1969348  | 0.000696334 | 5.215315021 |
| MRPL4       | NM_146388    | 44.04849175 | 2.570499122 | 0.001146354 | 17.13616293 |
| SAFB2       | NM_014649    | 47.92391664 | 2.359478544 | 0.000191558 | 20.31123223 |
| ABCA7       | NM_019112    | 82.05259292 | 5.632753107 | 6.44E-07    | 14.56704943 |
| HECTD3      | NM_024602    | 42.64209165 | 0.440522618 | 2.05E-05    | 96.79886995 |
| SNAI3-AS1   | NR_024402    | 92.12243793 | 1.207837919 | 2.79E-11    | 76.27052973 |
| AMZ2P1      | NR_026903    | 89.57839838 | 1.222718065 | 3.04E-10    | 73.26169534 |
| RWDD2A      | NM_033411    | 70.72637734 | 1.06543006  | 1.78E-08    | 66.38293771 |
| ATPIF1      | NM_178190    | 99.15443844 | 9.810342306 | 1.52E-06    | 10.10713341 |
| ZNF79       | NM_001286696 | 56.36231725 | 1.128423032 | 5.15E-06    | 49.94786145 |
| NDUFB1      | NM_004545    | 65.51956712 | 0.314847539 | 9.65E-09    | 208.0993465 |
| TMED4       | NM_182547    | 87.82822286 | 9.973380265 | 1.10E-05    | 8.806264328 |
| DLL4        | NM_019074    | 112.0370837 | 1.409591497 | 2.60E-13    | 79.48195197 |
| PTRF        | NM_012232    | 100.6358533 | 1.503788881 | 3.50E-11    | 66.92153039 |
| RPL21P28    | NR_026911    | 65.51956712 | 1.493196475 | 1.75E-07    | 43.87873145 |
| PARP2       | NM_001042618 | 238.8570176 | 0.554199947 | 2.70E-37    | 430.994299  |
| ST3GAL4-AS1 | NR_033839    | 46.51751654 | 0.766587317 | 3.75E-05    | 60.68130209 |
| DLG1-AS1    | NR_038289    | 45.03610167 | 2.603579563 | 0.000347515 | 17.29776278 |

|              |              |             |             |             |             |
|--------------|--------------|-------------|-------------|-------------|-------------|
| MKNK2        | NM_017572    | 102.1172682 | 8.600248568 | 1.42E-07    | 11.87375776 |
| TJAP1        | NM_001146016 | 63.61936206 | 1.182450121 | 2.03E-06    | 53.80299847 |
| NINJ1        | NM_004148    | 87.82822286 | 1.436836719 | 1.83E-10    | 61.12609853 |
| UNC50        | NM_014044    | 58.33753707 | 0.673230774 | 2.97E-07    | 86.65310523 |
| GCC1         | NM_024523    | 85.35919808 | 0.884075129 | 2.69E-11    | 96.55197305 |
| F2RL1        | NM_005242    | 114.3560789 | 1.979439404 | 5.52E-12    | 57.77195234 |
| TSPYL2       | NM_022117    | 91.13482802 | 1.365565384 | 3.44E-11    | 66.73779892 |
| TPRN         | NM_001128228 | 114.4310937 | 7.527457502 | 2.92E-09    | 15.20182527 |
| OPLAH        | NM_017570    | 74.45177268 | 0.46559434  | 1.96E-10    | 159.9069541 |
| HMG20B       | NM_006339    | 56.01854183 | 8.392311613 | 0.001145747 | 6.674983534 |
| ZBTB3        | NM_024784    | 53.13072686 | 7.373584444 | 0.000927665 | 7.205549385 |
| RARA         | NM_001145302 | 63.1255571  | 2.303596565 | 6.83E-06    | 27.4030436  |
| EZR-AS1      | NR_102425    | 94.44143318 | 10.8541703  | 2.29E-06    | 8.700935271 |
| SERTAD3      | NM_203344    | 61.719157   | 5.767659557 | 8.81E-05    | 10.70090153 |
| POLR2J4      | NR_003655    | 54.043322   | 1.253688969 | 5.52E-05    | 43.10744001 |
| EIF4G2       | NM_001418    | 93.87261345 | 1.722818346 | 4.12E-10    | 54.48781855 |
| GRWD1        | NM_031485    | 34.12867628 | 1.340728146 | 0.001364412 | 25.45532916 |
| SPATA2L      | NM_152339    | 118.650294  | 21.87172432 | 4.40E-06    | 5.424825782 |
| SOCS3        | NM_003955    | 137.6523446 | 6.293555563 | 3.99E-12    | 21.8719519  |
| MRPS17       | NM_015969    | 50.81173161 | 1.31319589  | 6.67E-06    | 38.69318508 |
| GPR3         | NM_005281    | 37.92908639 | 3.14471869  | 0.00221307  | 12.06120169 |
| UQCRH        | NM_001297565 | 59.74393718 | 0.144719959 | 9.92E-09    | 412.8244485 |
| RPL37        | NM_000997    | 102.9548486 | 1.179706095 | 3.88E-13    | 87.27160855 |
| PTCD1        | NM_015545    | 51.15550703 | 2.789456899 | 7.81E-05    | 18.33887702 |
| CCSAP        | NM_145257    | 34.20369105 | 0.931672705 | 0.002384783 | 36.71213172 |
| FGFR3        | NM_001163213 | 81.21501254 | 3.350841754 | 3.16E-07    | 24.23719725 |
| RPS26        | NM_001029    | 101.5484485 | 18.83768837 | 4.70E-05    | 5.390706464 |
| TMEM216      | NM_016499    | 65.93835731 | 0.23401244  | 3.51E-10    | 281.7728721 |
| POP5         | NM_015918    | 66.92596722 | 8.03770778  | 0.00031949  | 8.326499177 |
| RSG1         | NM_030907    | 43.62970157 | 0.97490207  | 2.98E-05    | 44.75290687 |
| NGRN         | NR_028052    | 121.5381089 | 2.206636885 | 6.63E-14    | 55.07843622 |
| GADD45GIP1   | NM_052850    | 94.44143318 | 9.361594909 | 2.23E-06    | 10.08817772 |
| HGS          | NM_004712    | 46.93630673 | 3.223563409 | 0.000298999 | 14.56037955 |
| RPL27        | NM_000988    | 75.4393826  | 3.917721898 | 6.90E-07    | 19.25593101 |
| VKORC1       | NM_206824    | 47.84890187 | 7.563538268 | 0.004572364 | 6.326258977 |
| FZD1         | NM_003505    | 59.25013222 | 2.52704867  | 2.64E-06    | 23.44637557 |
| CENPV        | NM_181716    | 49.33031674 | 1.965550116 | 5.13E-05    | 25.09746068 |
| HMGN2        | NM_005517    | 67.83856237 | 8.768190519 | 0.000187918 | 7.7368942   |
| ACAA1        | NM_001130410 | 36.44767152 | 0.075159935 | 2.76E-06    | 484.9348436 |
| CKAP2        | NM_001098525 | 47.43011168 | 1.036434369 | 5.46E-05    | 45.76277389 |
| ALDH1B1      | NM_000692    | 52.6369219  | 0.155026427 | 1.07E-07    | 339.5351544 |
| EEF1A1       | NM_001402    | 1221.875569 | 165.0309067 | 5.88E-68    | 7.403919624 |
| EFHD2        | NM_024329    | 65.44455235 | 0.980173832 | 3.18E-07    | 66.76831209 |
| MOB3A        | NM_130807    | 73.04537258 | 2.699873579 | 2.97E-07    | 27.05510849 |
| MLST8        | NM_001199174 | 65.51956712 | 9.495904701 | 0.000327468 | 6.89977092  |
| L3MBTL1      | NM_032107    | 62.63175215 | 0.142744962 | 1.66E-09    | 438.7668151 |
| EME1         | NM_001166131 | 88.740818   | 4.168509332 | 7.22E-08    | 21.28838175 |
| SLC9A3R1     | NM_004252    | 193.2520962 | 7.111093282 | 8.70E-17    | 27.17614416 |
| SEC14L2      | NM_001291932 | 77.83339261 | 4.137909415 | 1.93E-06    | 18.80983482 |
| NFE2L3       | NM_004289    | 64.60697198 | 6.349478377 | 3.61E-05    | 10.17516214 |
| RPS29        | NM_001032    | 117.7376988 | 9.522320131 | 1.50E-08    | 12.364392   |
| USF1         | NM_007122    | 57.91874689 | 1.474366574 | 7.47E-07    | 39.28381714 |
| PPP1R37      | NM_019121    | 50.24291189 | 0.149928718 | 3.39E-07    | 335.1119959 |
| MESDC1       | NM_022566    | 73.53917754 | 7.053253922 | 1.57E-05    | 10.42627677 |
| DTYMK        | NR_033255    | 56.43733202 | 6.907400369 | 0.000498259 | 8.170560413 |
| LOC100270746 | NR_026776    | 57.91874689 | 6.423050028 | 0.002141854 | 9.017327692 |
| MRT04        | NM_016183    | 51.2305218  | 3.662400893 | 0.000206123 | 13.9882343  |
| FBXL6        | NM_024555    | 113.4434838 | 15.58261883 | 7.32E-07    | 7.280129545 |
| FAM173A      | NM_023933    | 133.4331443 | 11.3903252  | 1.32E-08    | 11.71460357 |
| WDR62        | NM_001083961 | 31.73466626 | 0.051170888 | 9.12E-05    | 620.1703217 |
| AUP1         | NM_181575    | 51.72432676 | 3.892484027 | 0.000204152 | 13.28825665 |
| ERBB3        | NM_001005915 | 55.10594668 | 2.322126998 | 2.25E-05    | 23.7308066  |
| OAZ2         | NM_001301302 | 90.71603783 | 2.717943189 | 9.86E-09    | 33.37672332 |
| NR4A3        | NM_173199    | 47.43011168 | 1.14844524  | 2.74E-05    | 41.29941076 |
| EFNA4        | NM_182690    | 134.4207542 | 0.329183356 | 1.90E-19    | 408.3461438 |

|              |              |             |             |             |             |
|--------------|--------------|-------------|-------------|-------------|-------------|
| TFAP2E       | NM_178548    | 50.31792665 | 2.252787135 | 6.46E-05    | 22.33585494 |
| SOX4         | NM_003107    | 71.22018229 | 1.346476718 | 1.56E-08    | 52.89373471 |
| ELF3         | NM_001114309 | 139.0587447 | 1.469318917 | 1.47E-17    | 94.641635   |
| ESYT1        | NM_015292    | 104.4362634 | 3.197056818 | 3.68E-10    | 32.66637704 |
| DNAJB9       | NM_012328    | 35.46006161 | 1.82212278  | 0.001091705 | 19.46085192 |
| SFN          | NM_006142    | 140.9589497 | 26.13200211 | 5.06E-06    | 5.394112137 |
| CBX2         | NM_032647    | 93.94762822 | 1.448943531 | 3.48E-11    | 64.8387092  |
| VPS28        | NM_183057    | 120.0566941 | 5.020704825 | 7.09E-11    | 23.91231874 |
| CDCA4        | NM_017955    | 103.0298633 | 3.724118036 | 4.12E-10    | 27.66557406 |
| MDP1         | NM_001199822 | 78.32719757 | 3.273838872 | 3.59E-07    | 23.92518405 |
| PDLIM7       | NM_213636    | 129.5577194 | 10.22709472 | 2.37E-09    | 12.66808638 |
| LINC01106    | NR_027244    | 66.92596722 | 1.277591334 | 9.06E-08    | 52.38448748 |
| MYH9         | NM_002473    | 129.6327341 | 0.499673119 | 2.94E-15    | 259.4350768 |
| FTSJ3        | NM_017647    | 129.5577194 | 15.6539605  | 3.48E-08    | 8.276354048 |
| C10orf35     | NM_145306    | 44.12350652 | 0.463058754 | 2.09E-05    | 95.2870584  |
| LOC100129917 | NR_036512    | 92.54122812 | 9.290441619 | 6.67E-06    | 9.960907341 |
| ATP5L        | NR_033759    | 27.93425614 | 0.775275952 | 0.004069404 | 36.03137187 |
| PLK1         | NM_005030    | 70.23257238 | 1.840413676 | 6.52E-08    | 38.16129672 |
| SMPD2        | NM_003080    | 74.94557764 | 5.430360012 | 1.06E-05    | 13.80121713 |
| RPL29        | NM_000992    | 90.14721811 | 9.643844814 | 6.33E-06    | 9.347642963 |
| SNHG5        | NR_003038    | 144.8343746 | 5.849807456 | 4.35E-12    | 24.75882765 |
| KRT19        | NM_002276    | 70.65136257 | 12.63035251 | 0.000536416 | 5.593775988 |
| SLC20A1      | NM_005415    | 141.5277694 | 0.105627976 | 1.80E-23    | 1339.87013  |
| PSMD3        | NM_002809    | 51.64931199 | 1.425544056 | 2.77E-05    | 36.23129833 |
| RPL32        | NM_001007073 | 111.1244885 | 3.391206579 | 1.81E-11    | 32.76842207 |
| HEMK1        | NM_016173    | 50.73671684 | 1.123054761 | 1.61E-05    | 45.17742019 |
| FAM212A      | NM_203370    | 62.21296196 | 5.435241959 | 0.000186527 | 11.44621756 |
| SNAPC5       | NM_006049    | 74.0329825  | 4.654569926 | 3.11E-06    | 15.90543996 |
| TRIM72       | NM_001008274 | 44.61731148 | 5.103569469 | 0.001346728 | 8.742373696 |
| EIF3I        | NM_003757    | 50.73671684 | 1.241277206 | 7.31E-06    | 40.87460609 |
| NPRL2        | NM_006545    | 55.4497221  | 3.755369227 | 0.000104806 | 14.76545148 |
| IL17RB       | NM_018725    | 42.71710642 | 0.808128538 | 0.000165645 | 52.85929704 |
| ID2          | NM_002166    | 152.853985  | 14.70621683 | 7.87E-10    | 10.39383458 |
| PER1         | NM_002616    | 53.05571209 | 3.567887459 | 0.000148173 | 14.8703435  |
| POM121C      | NM_001099415 | 46.93630673 | 0.127137997 | 3.04E-06    | 369.1760752 |
| TFPT         | NM_013342    | 60.73154709 | 7.970770798 | 0.00081299  | 7.619281577 |
| DRAP1        | NM_006442    | 37.51029621 | 2.141158238 | 0.003151387 | 17.5186941  |
| TMEM185B     | NM_024121    | 52.6369219  | 2.695755953 | 7.75E-05    | 19.52584834 |
| SYNE4        | NM_001039876 | 50.24291189 | 5.663661363 | 0.000805582 | 8.871100983 |
| SLC25A39     | NM_016016    | 79.6585829  | 3.896508312 | 1.78E-07    | 20.4435809  |
| TMEM170A     | NM_145254    | 129.6327341 | 0.16116546  | 3.78E-20    | 804.3456346 |
| SLCO4A1      | NM_016354    | 70.72637734 | 0.9081803   | 1.16E-07    | 77.87702216 |
| C12orf10     | NM_021640    | 69.31997724 | 3.665173114 | 1.73E-06    | 18.91315228 |
| FHOD1        | NM_013241    | 78.2521828  | 6.994662472 | 1.00E-05    | 11.1874137  |
| ZBTB2        | NM_020861    | 31.73466626 | 0.511382143 | 0.000552411 | 62.05665705 |
| GPAA1        | NM_003801    | 99.22945321 | 10.77201605 | 1.20E-06    | 9.211781039 |
| GATA2-AS1    | NR_125398    | 52.6369219  | 2.294530337 | 3.92E-05    | 22.94017257 |
| NOL6         | NM_022917    | 64.11316702 | 1.121274132 | 3.32E-07    | 57.17885146 |
| ADPRHL2      | NM_017825    | 103.4486535 | 5.446906179 | 3.30E-09    | 18.99218567 |
| TSPAN31      | NM_005981    | 51.2305218  | 4.807506859 | 0.000298768 | 10.65635958 |
| TMA7         | NM_015933    | 62.06293242 | 5.136338068 | 8.00E-05    | 12.08310894 |
| COX8A        | NM_004074    | 67.83856237 | 6.936293389 | 7.38E-05    | 9.780232548 |
| MED11        | NM_001001683 | 141.0339645 | 2.664287993 | 5.20E-14    | 52.93495479 |
| MARCKSL1     | NR_052852    | 95.0102529  | 16.16435675 | 9.30E-05    | 5.877762684 |
| GDF15        | NM_004864    | 42.49206211 | 1.10754114  | 8.06E-05    | 38.36612526 |
| TCTA         | NM_022171    | 72.13277744 | 11.18169349 | 0.000405242 | 6.450970733 |
| RPS4X        | NM_001007    | 85.9280178  | 3.268635388 | 1.22E-08    | 26.28865187 |
| LRR1         | NM_203467    | 49.74910693 | 0.314860552 | 3.54E-07    | 158.0036196 |
| TP53RK       | NM_033550    | 42.64209165 | 1.173061381 | 4.03E-05    | 36.35111713 |
| CHPF         | NM_024536    | 77.41460243 | 7.965036061 | 2.78E-05    | 9.719303445 |
| TIMM13       | NM_012458    | 45.52990662 | 4.048179227 | 0.002141854 | 11.24700861 |
| CALM1        | NM_006888    | 153.8415949 | 3.170339165 | 4.02E-16    | 48.52527976 |
| TTLL3        | NM_001025930 | 39.82929145 | 0.526135542 | 4.01E-05    | 75.70157936 |
| KLHL11       | NM_018143    | 90.64102306 | 0.847764765 | 7.48E-12    | 106.9176579 |
| KCTD11       | NM_001002914 | 58.83134203 | 2.005812395 | 4.49E-06    | 29.33043099 |



|              |              |             |             |             |             |
|--------------|--------------|-------------|-------------|-------------|-------------|
| MED18        | NM_017638    | 39.82929145 | 0.801233481 | 7.93E-05    | 49.70996895 |
| FCHSD1       | NM_033449    | 50.73671684 | 0.309537612 | 9.50E-07    | 163.9113146 |
| RPS9         | NM_001013    | 184.7386808 | 12.6159702  | 5.94E-14    | 14.64324011 |
| ACTR1A       | NM_005736    | 71.56395771 | 0.591523535 | 2.12E-08    | 120.9824351 |
| MYL6         | NM_021019    | 85.9280178  | 15.47780771 | 0.000159127 | 5.551691777 |
| PRPF8        | NM_006445    | 80.07737309 | 0.144905042 | 2.44E-12    | 552.6196479 |
| SLC7A5P2     | NR_002594    | 178.4692459 | 19.39106578 | 4.91E-11    | 9.20368421  |
| PBX4         | NR_038198    | 45.52990662 | 0.495135186 | 1.78E-05    | 91.95449632 |
| CLN8         | NM_018941    | 36.52268629 | 1.485241631 | 0.001696594 | 24.59040033 |
| LOC731157    | NR_105024    | 114.9248986 | 20.69159288 | 0.001063886 | 5.554183251 |
| SELM         | NM_080430    | 94.93523814 | 17.2697401  | 5.82E-05    | 5.497201322 |
| SLC46A1      | NM_080669    | 43.62970157 | 0.901761212 | 9.13E-05    | 48.38276586 |
| GNG13        | NM_016541    | 68.82617228 | 10.32222712 | 0.000342071 | 6.667763793 |
| H2AFX        | NM_002105    | 177.5566508 | 43.65311504 | 3.29E-06    | 4.067445144 |
| PP7080       | NR_024158    | 61.22535205 | 0.483218876 | 1.93E-07    | 126.7031465 |
| FKBP4        | NM_002014    | 96.34163824 | 3.355638193 | 1.07E-09    | 28.71037719 |
| RTCA-AS1     | NR_110435    | 46.02371158 | 3.501921778 | 0.002539019 | 13.14241565 |
| TOB2         | NM_016272    | 185.2324858 | 7.575825039 | 1.44E-16    | 24.45047039 |
| CCNL2        | NM_030937    | 72.13277744 | 3.047097769 | 1.92E-06    | 23.67261667 |
| TEN1-CDK3    | NR_037709    | 58.75632726 | 1.189522045 | 3.99E-06    | 49.39490404 |
| CNNM3        | NM_017623    | 80.72120758 | 0.668628992 | 9.94E-10    | 120.7264545 |
| RPL10A       | NM_007104    | 144.7593598 | 28.92543903 | 1.68E-06    | 5.004569151 |
| DDX56        | NM_001257189 | 70.72637734 | 5.158198717 | 1.14E-05    | 13.71144875 |
| IFI30        | NM_006332    | 90.64102306 | 0.981335737 | 2.59E-11    | 92.36494671 |
| PDP1         | NM_001161779 | 69.81378219 | 0.108373539 | 1.09E-10    | 644.195833  |
| DAPK3        | NM_001348    | 86.84061295 | 1.424762582 | 4.50E-10    | 60.95093602 |
| CLN5         | NM_006493    | 84.5216177  | 0.302021696 | 1.12E-12    | 279.8528016 |
| MRPS7        | NM_015971    | 83.45899302 | 4.836035471 | 5.06E-07    | 17.25772971 |
| CYTH2        | NM_004228    | 54.11833677 | 8.308470005 | 0.001093941 | 6.513634488 |
| YTHDF3-AS1   | NR_102684    | 108.2366735 | 5.073229514 | 4.02E-06    | 21.33486633 |
| LINC00476    | NR_023389    | 96.34163824 | 7.733132004 | 2.99E-07    | 12.4582948  |
| CDC37        | NM_007065    | 81.55878796 | 0.960386704 | 2.95E-10    | 84.92286249 |
| VPS9D1-AS1   | NR_036480    | 112.874664  | 3.808958344 | 1.10E-11    | 29.63399802 |
| PREB         | NM_013388    | 83.04020283 | 4.440181085 | 2.33E-07    | 18.70198563 |
| NUDC         | NM_006600    | 74.0329825  | 1.344117973 | 8.18E-08    | 55.07922962 |
| C3orf38      | NM_173824    | 55.94352706 | 0.168453649 | 1.08E-08    | 332.1004165 |
| MSX1         | NM_002448    | 76.42699251 | 10.09456377 | 3.33E-05    | 7.571104034 |
| C15orf61     | NM_001143936 | 77.75837784 | 2.245255006 | 2.26E-08    | 34.63231465 |
| IFI6         | NM_002038    | 43.13589661 | 0.57608698  | 1.29E-05    | 74.87740236 |
| C5orf24      | NM_001135586 | 153.8415949 | 0.665558729 | 5.62E-21    | 231.1465364 |
| CCNF         | NM_001761    | 69.73876742 | 3.347385214 | 1.89E-06    | 20.83380399 |
| THAP7        | NM_030573    | 92.54122812 | 18.14010424 | 0.000200205 | 5.101471685 |
| BCAM         | NM_001013257 | 56.93113697 | 2.162337398 | 6.37E-06    | 26.32851701 |
| TNFRSF1A     | NM_001065    | 40.81690136 | 4.57731839  | 0.004901918 | 8.917208261 |
| PRR19        | NM_199285    | 51.72432676 | 0.306939253 | 5.56E-07    | 168.5164941 |
| SMG9         | NM_019108    | 55.52473687 | 0.98099266  | 1.15E-05    | 56.600563   |
| JUP          | NM_021991    | 161.8612054 | 0.840487571 | 2.62E-20    | 192.5801297 |
| RPL23        | NM_000978    | 109.2242835 | 8.965757412 | 2.62E-08    | 12.18238219 |
| PEX12        | NM_000286    | 74.0329825  | 0.474351575 | 2.57E-09    | 156.0719652 |
| MPLKIP       | NM_138701    | 83.04020283 | 0.86883443  | 1.05E-09    | 95.5765563  |
| GADD45A      | NM_001924    | 168.1306403 | 13.09276713 | 1.42E-12    | 12.84149016 |
| RND1         | NM_014470    | 100.1420484 | 0.549714325 | 2.79E-13    | 182.1710729 |
| SH2D5        | NM_001103160 | 21.81485078 | 0.10236929  | 0.00090997  | 213.0995616 |
| DNAJA1       | NM_001539    | 133.8519344 | 0.318960948 | 1.10E-20    | 419.6499143 |
| MRPL16       | NM_017840    | 82.96518806 | 1.955495707 | 7.31E-09    | 42.4266787  |
| HYOU1        | NM_006389    | 82.12760769 | 1.739757857 | 2.15E-09    | 47.20634388 |
| TNFSF9       | NM_003811    | 145.671955  | 4.785223935 | 2.16E-14    | 30.4420351  |
| CHD3         | NM_005852    | 23.71505584 | 0.04614603  | 0.00090997  | 513.9132396 |
| HPS6         | NM_024747    | 80.15238786 | 1.58980802  | 9.67E-09    | 50.4163942  |
| C9orf142     | NM_183241    | 66.92596722 | 2.422501144 | 1.13E-05    | 27.62680521 |
| SAT1         | NM_002970    | 121.1193188 | 3.425997132 | 5.14E-12    | 35.35301231 |
| PLEKHN1      | NM_001160184 | 56.8561222  | 0.593606945 | 1.97E-07    | 95.78075645 |
| TPI1P2       | NR_002187    | 63.1255571  | 1.574500565 | 1.90E-06    | 40.09243217 |
| LOC101927415 | NR_110049    | 35.95386656 | 2.925104266 | 0.00221307  | 12.29148204 |
| PSMB4        | NM_002796    | 59.25013222 | 3.238809421 | 2.75E-05    | 18.29380014 |

|                        |              |             |             |             |             |
|------------------------|--------------|-------------|-------------|-------------|-------------|
| GALK1                  | NM_000154    | 57.76871735 | 2.206578549 | 1.48E-05    | 26.18022248 |
| RAVER1                 | NM_133452    | 36.02888133 | 3.10485351  | 0.002177198 | 11.60405192 |
| PHGDH                  | NM_006623    | 39.33548649 | 0.20514851  | 1.40E-05    | 191.741517  |
| LOC389906              | NR_034031    | 77.41460243 | 0.299121729 | 3.30E-11    | 258.8063482 |
| P4HTM                  | NM_177938    | 39.82929145 | 1.887333618 | 0.000792704 | 21.10347162 |
| SPINT2                 | NM_001166103 | 65.93835731 | 1.056869555 | 6.92E-07    | 62.39025144 |
| NCAPD2                 | NM_014865    | 44.54229671 | 0.113069075 | 6.63E-07    | 393.938809  |
| FAU                    | NM_001997    | 79.23979271 | 15.86236913 | 0.000741399 | 4.995457618 |
| C9orf40                | NM_017998    | 52.6369219  | 0.669837091 | 9.50E-07    | 78.58167692 |
| RAB1B                  | NM_030981    | 22.23364097 | 0.069129638 | 0.00090997  | 321.6224106 |
| STAG3L5P-PVRIG2P-PILRB | NR_036569    | 140.1213693 | 4.682704956 | 9.92E-13    | 29.92316848 |
| UBE2Z                  | NM_023079    | 133.4331443 | 1.527253225 | 8.11E-16    | 87.36805531 |
| COQ6                   | NM_182476    | 81.13999777 | 2.380929494 | 9.98E-08    | 34.07912666 |
| STAG3L1                | NR_040583    | 183.257266  | 1.328421661 | 3.77E-24    | 137.9511276 |
| RBM14-RBM4             | NM_001198846 | 154.7541901 | 6.487567632 | 4.88E-13    | 23.85396174 |
| PRPF31                 | NM_015629    | 58.83134203 | 0.391088631 | 1.08E-07    | 150.4296912 |
| CYR61                  | NM_001554    | 113.9372887 | 2.666861129 | 3.95E-12    | 42.72336773 |
| MXN1-AS1               | NR_038835    | 48.34270683 | 3.759059875 | 0.00026062  | 12.86031839 |
| SAP18                  | NM_005870    | 46.367487   | 0.644331604 | 1.10E-05    | 71.96214914 |
| TMEM80                 | NM_174940    | 51.72432676 | 5.357290312 | 0.001146509 | 9.65494191  |
| NFATC2IP               | NM_032815    | 41.23569155 | 0.51035371  | 1.73E-05    | 80.79825959 |
| STARD7                 | NM_020151    | 143.7717499 | 0.753362593 | 1.87E-18    | 190.8400434 |
| LASP1                  | NR_073384    | 89.72842792 | 1.354955208 | 8.13E-09    | 66.22243109 |
| GNB1L                  | NM_053004    | 80.64619281 | 1.492739121 | 1.20E-07    | 54.02564433 |
| PDXK                   | NM_003681    | 72.13277744 | 1.866272744 | 7.56E-07    | 38.65071579 |
| NCLN                   | NM_020170    | 50.73671684 | 0.27797092  | 2.56E-07    | 182.5252689 |
| MSX2                   | NM_002449    | 102.9548486 | 1.810584462 | 1.85E-11    | 56.86277039 |
| GRPEL1                 | NM_025196    | 87.3344179  | 2.266793455 | 1.41E-09    | 38.52773517 |
| YWHAH                  | NM_003405    | 73.12038735 | 0.612545741 | 1.50E-09    | 119.3713098 |
| RPL13AP5               | NR_026712    | 138.6399545 | 27.53452381 | 1.51E-06    | 5.035131729 |
| SHISA4                 | NR_030775    | 53.13072686 | 1.10413955  | 2.46E-06    | 48.1195759  |
| CFAP20                 | NM_013242    | 77.83339261 | 1.089133225 | 6.00E-09    | 71.46361053 |
| CDR2L                  | NM_014603    | 139.4775348 | 0.560117572 | 1.35E-19    | 249.0147457 |
| LOC101927746           | NR_110115    | 74.0329825  | 2.822144738 | 6.70E-07    | 26.23287938 |
| CSRNP1                 | NM_033027    | 70.65136257 | 3.208099294 | 1.60E-06    | 22.02281042 |
| ZEB1-AS1               | NR_024284    | 41.72949651 | 0.734385779 | 4.63E-05    | 56.82231019 |
| CDK2AP2                | NR_073484    | 86.34680799 | 7.590507305 | 6.57E-06    | 11.37563071 |
| PPRC1                  | NM_001288727 | 102.5360584 | 0.051604075 | 8.94E-17    | 1986.976    |
| AAMP                   | NM_001087    | 66.85095245 | 4.607156604 | 1.86E-05    | 14.51024096 |
| WASH7P                 | NR_024540    | 21.32104583 | 0.158707547 | 0.004454733 | 134.3417264 |
| RPS6                   | NM_001010    | 98.24184329 | 2.075399088 | 2.41E-10    | 47.33636238 |
| C1orf145               | NR_073154    | 28.50307587 | 0.349725426 | 0.000265346 | 81.5012971  |
| POLR2C                 | NM_032940    | 73.53917754 | 1.67589003  | 8.57E-08    | 43.88067009 |
| EME2                   | NM_001257370 | 73.53917754 | 1.684790566 | 1.24E-07    | 43.64885406 |
| SGTA                   | NM_003021    | 66.85095245 | 0.38170026  | 5.14E-09    | 175.1399186 |
| LOC256880              | NR_002799    | 55.52473687 | 1.414747428 | 1.78E-05    | 39.24710218 |
| TOR1A                  | NM_000113    | 95.42904309 | 0.707600924 | 1.19E-12    | 134.8628018 |
| CKS1B                  | NR_024163    | 49.74910693 | 1.464917692 | 3.71E-05    | 33.96034274 |
| TRA2B                  | NM_004593    | 90.71603783 | 0.046162747 | 4.43E-16    | 1965.135179 |
| ABCB6                  | NM_005689    | 80.72120758 | 3.427951538 | 1.08E-07    | 23.54794305 |
| TAF9                   | NM_003187    | 87.3344179  | 2.096152888 | 1.54E-09    | 41.66414502 |
| MZT2A                  | NM_001085365 | 31.80968103 | 1.975892134 | 0.004263608 | 16.09889552 |
| RAD23A                 | NR_072976    | 57.91874689 | 5.918122818 | 0.000325453 | 9.786675381 |
| ROMO1                  | NM_080748    | 102.5360584 | 13.62304048 | 8.22E-06    | 7.526664735 |
| LOC100506083           | NR_039997    | 26.03405109 | 0.944908481 | 0.004501185 | 27.55192868 |
| RITA1                  | NM_032848    | 63.61936206 | 3.85411323  | 7.72E-06    | 16.50687415 |
| RPS27                  | NM_001030    | 130.4703145 | 6.785582143 | 7.60E-10    | 19.22757867 |
| STAG3L3                | NR_040582    | 86.42182276 | 0.344875536 | 1.12E-12    | 250.5884408 |
| COG1                   | NM_018714    | 64.95074739 | 2.750231495 | 1.34E-06    | 23.61646557 |
| MEIG1                  | NM_001080836 | 81.21501254 | 2.419317889 | 1.16E-07    | 33.56938454 |
| PIGH                   | NM_004569    | 84.94040789 | 0.168769492 | 3.91E-13    | 503.2924322 |
| COX6B1                 | NM_001863    | 45.52990662 | 2.3785505   | 0.000134846 | 19.14187091 |
| ENDOG                  | NM_004435    | 84.02781274 | 16.52485117 | 0.000419065 | 5.08493613  |
| MAN2B2                 | NM_015274    | 62.13794719 | 0.084695819 | 9.55E-10    | 733.6601498 |
| ISG15                  | NM_005101    | 88.740818   | 20.60778776 | 0.003626158 | 4.306178763 |

|              |              |             |             |             |             |
|--------------|--------------|-------------|-------------|-------------|-------------|
| RBX1         | NM_014248    | 91.62863298 | 0.273050615 | 1.16E-12    | 335.573802  |
| LOC283335    | NR_033854    | 63.61936206 | 8.468801977 | 0.000574078 | 7.512203289 |
| EIF2B5       | NM_003907    | 55.03093192 | 0.270255386 | 1.93E-07    | 203.6256618 |
| LOC100507373 | NR_045214    | 70.65136257 | 1.550645158 | 4.21E-07    | 45.56255969 |
| CDH15        | NM_004933    | 33.21608113 | 0.89367872  | 0.000346543 | 37.16781031 |
| C21orf59     | NM_021254    | 108.1616588 | 0.842869983 | 1.03E-14    | 128.3254368 |
| NBEAL2       | NM_015175    | 36.02888133 | 0.068669961 | 6.06E-06    | 524.6672765 |
| ATP5G1       | NM_001002027 | 82.4713831  | 5.390748511 | 8.18E-07    | 15.29868866 |
| SLC39A13     | NM_152264    | 59.32514699 | 7.203478599 | 0.000212284 | 8.235624799 |
| SLX1B        | NM_024044    | 242.8511736 | 58.61613708 | 6.61E-09    | 4.143077072 |
| HEXA-AS1     | NR_027262    | 49.33031674 | 0.846533065 | 5.83E-06    | 58.27334899 |
| TALDO1       | NM_006755    | 69.73876742 | 4.909494242 | 1.03E-05    | 14.20487814 |
| SF3B2        | NM_006842    | 54.043322   | 0.390304591 | 8.01E-07    | 138.4644794 |
| CISD2        | NM_001008388 | 113.9372887 | 0.526472745 | 4.98E-15    | 216.4163098 |
| MCOLN1       | NM_020533    | 60.73154709 | 2.112630127 | 2.26E-06    | 28.74689057 |
| AKR7A2       | NM_003689    | 122.0319139 | 1.603805231 | 1.01E-14    | 76.08898608 |
| PNKP         | NM_007254    | 58.33753707 | 9.857437301 | 0.001352658 | 5.918124081 |
| HSF1         | NM_005526    | 109.6430736 | 4.858652577 | 1.09E-09    | 22.56655974 |
| LRP10        | NM_014045    | 30.32826616 | 1.366465101 | 0.002277106 | 22.1946877  |
| PGLS         | NM_012088    | 54.53712696 | 2.098957615 | 9.20E-06    | 25.98295772 |
| TRIM56       | NM_030961    | 39.82929145 | 1.75956535  | 0.000162048 | 22.63586939 |
| UBE2S        | NM_014501    | 136.2459445 | 13.42153853 | 2.12E-09    | 10.15129109 |
| DHX30        | NM_138615    | 67.34475741 | 1.116978273 | 8.71E-07    | 60.29191348 |
| CDC34        | NM_004359    | 57.42494193 | 0.432577372 | 1.18E-07    | 132.7506839 |
| EFNA1        | NM_182685    | 75.93318755 | 5.987446599 | 2.18E-06    | 12.6820651  |
| ZSCAN25      | NM_145115    | 69.73876742 | 0.113427485 | 3.49E-10    | 614.8312919 |
| TIMM44       | NM_006351    | 49.8241217  | 0.104790428 | 6.69E-08    | 475.4644361 |
| GEMIN4       | NM_015721    | 101.1296583 | 4.633698682 | 3.58E-09    | 21.82482401 |
| SLC30A3      | NM_003459    | 118.156489  | 1.27138126  | 9.83E-15    | 92.93552826 |
| C22orf23     | NM_032561    | 42.64209165 | 0.140643199 | 3.11E-06    | 303.1934135 |
| ORAI1        | NM_032790    | 50.24291189 | 0.275205545 | 7.82E-08    | 182.5650422 |
| LINC01144    | NR_024270    | 85.01542266 | 3.541668851 | 2.22E-07    | 24.00433983 |
| IPO5P1       | NR_103742    | 43.62970157 | 0.231308768 | 1.93E-06    | 188.6210448 |
| DGAT1        | NM_012079    | 81.63380273 | 17.2363171  | 0.00042897  | 4.736151131 |
| OST4         | NM_001134693 | 82.96518806 | 9.103341558 | 5.36E-05    | 9.113707042 |
| CFL1         | NM_005507    | 92.04742316 | 18.90192161 | 0.000184662 | 4.869738911 |
| ABHD14A-ACY1 | NR_037192    | 76.42699251 | 4.774983003 | 9.77E-07    | 16.00570986 |
| EMP3         | NM_001425    | 32.22847122 | 2.246445993 | 0.003110618 | 14.346426   |
| LY6E         | NM_002346    | 38.91669631 | 2.097195703 | 0.000832154 | 18.55654017 |
| TMEM258      | NM_014206    | 84.5216177  | 1.16293552  | 2.11E-10    | 72.67953921 |
| PLA2G15      | NM_012320    | 47.43011168 | 0.117653658 | 6.69E-08    | 403.1333375 |
| NAGK         | NM_017567    | 104.8550536 | 2.197296237 | 2.00E-11    | 47.72003513 |
| CPSF1        | NM_013291    | 105.2738438 | 9.568854949 | 1.11E-07    | 11.00171801 |
| RELT         | NM_152222    | 164.2552154 | 0.823729793 | 8.57E-22    | 199.4042426 |
| CCT5         | NM_012073    | 36.02888133 | 0.732079146 | 0.000655852 | 49.21446206 |
| AHCY         | NM_000687    | 87.75320809 | 4.02341983  | 1.02E-07    | 21.81060188 |
| PITHD1       | NM_020362    | 123.0195238 | 1.758020465 | 1.89E-14    | 69.9761614  |
| NFE2L1       | NM_003204    | 94.93523814 | 7.110935775 | 1.49E-07    | 13.35059704 |
| RPL26        | NM_000987    | 91.55361821 | 1.908974808 | 5.97E-10    | 47.95957382 |
| NOA1         | NM_032313    | 77.33958766 | 0.329481146 | 1.25E-10    | 234.7314514 |
| SLC25A4      | NM_001151    | 107.3240784 | 0.69149762  | 1.08E-14    | 155.2052751 |
| NARFL        | NM_022493    | 42.1482867  | 0.215402414 | 7.16E-06    | 195.6723039 |
| SPAG7        | NM_004890    | 36.94147648 | 0.878140638 | 0.000330125 | 42.06783616 |
| UQCRQ        | NM_014402    | 115.8374938 | 14.66935149 | 8.21E-07    | 7.896565424 |
| TTLL12       | NM_015140    | 68.40738209 | 0.625275178 | 4.42E-08    | 109.4036426 |
| POLRMT       | NM_005035    | 38.34787658 | 0.121208434 | 6.06E-06    | 316.3796055 |
| FARSA        | NM_004461    | 87.82822286 | 1.31634143  | 7.22E-11    | 66.72146063 |
| INPP5E       | NM_019892    | 53.13072686 | 0.938052845 | 2.40E-06    | 56.63937498 |
| SRPR         | NM_001177842 | 49.74910693 | 7.585510485 | 0.002169154 | 6.558438885 |
| MICALL2      | NM_182924    | 188.9578811 | 1.91476873  | 5.84E-21    | 98.68444067 |
| TUBA1B       | NM_006082    | 95.42904309 | 18.31854012 | 0.00010984  | 5.209424031 |
| LOC93622     | NR_015433    | 59.32514699 | 8.458443978 | 0.001034534 | 7.013718734 |
| RPL37A       | NM_000998    | 96.41665301 | 3.343495124 | 1.27E-09    | 28.83708497 |
| GGN          | NM_152657    | 68.40738209 | 8.188450086 | 0.000139517 | 8.354130681 |
| SOX13        | NM_005686    | 149.5473799 | 1.519870352 | 1.33E-15    | 98.39482665 |

|              |              |             |             |             |             |
|--------------|--------------|-------------|-------------|-------------|-------------|
| TTC32        | NM_001008237 | 56.51234679 | 3.17909039  | 1.67E-05    | 17.77626297 |
| ZNF213-AS1   | NR_110900    | 49.8241217  | 3.305640975 | 0.000417813 | 15.07245405 |
| YARS2        | NM_001040436 | 40.24808164 | 3.498114662 | 0.003474663 | 11.50564962 |
| RCCD1        | NM_033544    | 75.93318755 | 0.526765079 | 6.50E-11    | 144.1500027 |
| LENG8        | NM_052925    | 90.14721811 | 6.744845715 | 2.57E-07    | 13.36534917 |
| MTG1         | NM_138384    | 48.91152655 | 0.418994043 | 1.72E-06    | 116.7356134 |
| OAZ1         | NM_004152    | 178.0504557 | 12.25710514 | 9.84E-14    | 14.52630566 |
| DNAJC28      | NM_001040192 | 52.21813171 | 3.251069529 | 0.000204152 | 16.06183173 |
| TMEM223      | NM_001080501 | 136.7397494 | 16.01315142 | 5.65E-08    | 8.539215413 |
| GGCX         | NM_000821    | 44.12350652 | 4.827596665 | 0.003006431 | 9.139849408 |
| DGCR6        | NM_005675    | 59.25013222 | 9.635860274 | 0.000684772 | 6.14891982  |
| THOP1        | NM_003249    | 88.24701305 | 0.332328571 | 7.85E-13    | 265.541457  |
| TSR2         | NM_058163    | 32.72227618 | 0.976783794 | 0.001059813 | 33.50001955 |
| LIN7C        | NM_018362    | 66.92596722 | 0.134042657 | 1.05E-09    | 499.2885742 |
| CUEDC2       | NM_024040    | 39.33548649 | 3.597844883 | 0.003552238 | 10.93306904 |
| SOCS1        | NM_003745    | 136.3209592 | 6.837974364 | 4.91E-11    | 19.93586872 |
| CLUHP3       | NR_024034    | 46.93630673 | 1.153166671 | 2.56E-05    | 40.70210136 |
| CCDC130      | NM_030818    | 116.256284  | 1.945891013 | 1.60E-12    | 59.74449915 |
| GSTP1        | NM_000852    | 87.3344179  | 12.90192634 | 5.45E-05    | 6.769099094 |
| MRPS26       | NM_030811    | 129.6327341 | 8.407004134 | 4.11E-10    | 15.41961108 |
| THOC6        | NM_001142350 | 96.83544319 | 2.576843171 | 3.70E-10    | 37.57909844 |
| SOWAHC       | NM_023016    | 95.42904309 | 0.935801148 | 8.91E-12    | 101.9757705 |
| LOC101928068 | NR_111907    | 45.52990662 | 2.038890536 | 0.0002466   | 22.33072636 |
| FLJ30679     | NR_026674    | 70.15755761 | 6.727376799 | 3.37E-05    | 10.4286648  |
| TYMS         | NM_001071    | 52.6369219  | 3.449168706 | 0.000361271 | 15.26075596 |
| SIX4         | NM_017420    | 24.2088608  | 0.404609479 | 0.003847617 | 59.83265851 |
| FAHD2A       | NM_016044    | 65.93835731 | 1.110595977 | 7.28E-08    | 59.37204769 |
| NAPRT        | NM_001286829 | 92.04742316 | 11.04249799 | 9.84E-06    | 8.335742805 |
| ARL4D        | NM_001661    | 88.740818   | 2.495025809 | 2.17E-08    | 35.56709421 |
| TRADD        | NM_003789    | 46.02371158 | 1.097691791 | 1.53E-05    | 41.92771775 |
| NUDCD2       | NM_145266    | 96.76042842 | 0.158035215 | 1.25E-14    | 612.2713128 |
| MTHFD2       | NR_027405    | 167.6368353 | 0.750537934 | 5.70E-24    | 223.3555796 |
| GADD45B      | NM_015675    | 147.1533698 | 20.25027179 | 2.72E-08    | 7.266735547 |
| ARPC5L       | NM_030978    | 99.22945321 | 1.018372704 | 1.69E-12    | 97.43923101 |
| CELSR3-AS1   | NR_111921    | 59.81895195 | 1.182192883 | 8.18E-07    | 50.59999329 |
| COX20        | NM_198076    | 109.7180884 | 3.303661271 | 2.76E-11    | 33.2110587  |
| RRAGA        | NM_006570    | 72.13277744 | 3.846774141 | 5.40E-06    | 18.75149796 |
| RPS11        | NM_001015    | 76.42699251 | 6.283180519 | 7.36E-06    | 12.16374291 |
| GAL          | NM_015973    | 19.345826   | 0.227021502 | 0.002846449 | 85.21583113 |
| LRWD1        | NM_152892    | 110.1368786 | 6.141504418 | 2.56E-09    | 17.9332084  |
| CTC-338M12.4 | NR_109909    | 70.23257238 | 4.115283611 | 2.15E-06    | 17.06627757 |
| SMYD5        | NM_006062    | 37.43528144 | 0.407918823 | 2.25E-05    | 91.77139981 |
| PRKAB1       | NM_006253    | 51.15550703 | 1.061784381 | 1.14E-05    | 48.17880913 |
| SLC7A5       | NM_003486    | 219.4361768 | 0.668355954 | 8.48E-30    | 328.3223192 |
| NUMBL        | NM_004756    | 56.01854183 | 1.557471886 | 1.11E-05    | 35.96761029 |
| SEC61A1      | NM_013336    | 87.82822286 | 1.895478469 | 1.66E-09    | 46.33564785 |
| GNB2L1       | NM_006098    | 117.6626841 | 9.717366412 | 6.71E-09    | 12.10849515 |
| REEP6        | NM_138393    | 90.14721811 | 0.794268431 | 6.39E-12    | 113.4971687 |
| EFNB1        | NM_004429    | 70.72637734 | 1.305224453 | 3.68E-08    | 54.18713784 |
| CCS          | NM_005125    | 143.8467647 | 0.522598453 | 1.04E-19    | 275.2529478 |
| KRTCAP2      | NM_173852    | 69.31997724 | 2.731037734 | 9.83E-07    | 25.38228468 |
| SLC25A30-AS1 | NR_047031    | 73.53917754 | 5.233827802 | 1.20E-05    | 14.05074456 |
| SUMO2        | NM_006937    | 68.25735255 | 0.125938076 | 3.49E-10    | 541.9913896 |
| NUTF2        | NM_005796    | 49.8241217  | 1.479120335 | 9.85E-05    | 33.68496837 |
| TCEB3        | NM_003198    | 36.02888133 | 0.359084325 | 3.75E-05    | 100.3354333 |
| EXOSC8       | NM_181503    | 30.74705635 | 0.114456521 | 2.87E-05    | 268.6352522 |
| UQCC3        | NM_001085372 | 106.3364685 | 17.04946251 | 1.44E-05    | 6.236939636 |
| TUBA1C       | NM_032704    | 149.5473799 | 7.153900518 | 1.36E-12    | 20.9043136  |
| DUSP23       | NM_017823    | 46.93630673 | 2.10014741  | 0.000542031 | 22.34905346 |
| BOLA1        | NM_016074    | 55.94352706 | 8.104170174 | 0.004716646 | 6.903054336 |
| CDC42EP2     | NM_006779    | 127.2387241 | 3.625570055 | 2.93E-13    | 35.0948188  |
| LOC400684    | NR_046201    | 111.6182935 | 1.529204423 | 3.07E-13    | 72.99108727 |
| VPS37C       | NM_017966    | 39.82929145 | 0.342092448 | 2.84E-05    | 116.4284442 |
| LRRC73       | NM_001012974 | 62.21296196 | 2.347650915 | 2.52E-06    | 26.50009061 |
| TONSL        | NM_013432    | 115.4187036 | 3.68645731  | 4.64E-11    | 31.3088404  |

|              |              |             |             |             |             |
|--------------|--------------|-------------|-------------|-------------|-------------|
| PYCRL        | NM_023078    | 76.92079747 | 2.836630989 | 2.14E-07    | 27.11695591 |
| IRF2BPL      | NM_024496    | 27.93425614 | 0.173604263 | 0.000779209 | 160.9076623 |
| IRF7         | NM_001572    | 119.0690842 | 18.94645435 | 1.32E-06    | 6.284504846 |
| NUDT5        | NM_014142    | 54.53712696 | 0.035359152 | 2.37E-09    | 1542.37655  |
| C1orf213     | NR_033690    | 99.15443844 | 11.6386457  | 2.51E-06    | 8.519413767 |
| LPPR2        | NM_001170635 | 61.719157   | 0.641541522 | 3.94E-08    | 96.20446209 |
| KLHDC2       | NM_014315    | 70.23257238 | 1.821996259 | 1.16E-07    | 38.54704533 |
| TFE3         | NM_006521    | 34.20369105 | 1.32847423  | 0.002284556 | 25.74659732 |
| C15orf39     | NM_015492    | 171.4372454 | 1.577772917 | 5.84E-21    | 108.6577438 |
| PJA1         | NM_001032396 | 38.91669631 | 1.4422238   | 0.000104785 | 26.9838123  |
| FAM103A1     | NM_031452    | 74.52678745 | 0.780642774 | 1.85E-09    | 95.46849074 |
| CYB5R1       | NM_016243    | 28.4280611  | 1.322580874 | 0.004700193 | 21.49438395 |
| MT1X         | NM_005952    | 61.15033728 | 2.10027777  | 1.99E-05    | 29.11535709 |
| SLC48A1      | NM_017842    | 70.72637734 | 1.716145241 | 3.11E-08    | 41.21234944 |
| JUNB         | NM_002229    | 172.3498406 | 41.37202884 | 3.26E-06    | 4.165854211 |
| TRIM28       | NM_005762    | 92.61624289 | 11.54429208 | 1.07E-05    | 8.022687075 |
| EIF2S2       | NM_003908    | 92.04742316 | 1.552019469 | 7.89E-10    | 59.3081627  |
| FUK          | NM_145059    | 55.03093192 | 3.050187143 | 4.71E-05    | 18.04182148 |
| GALNS        | NM_000512    | 76.42699251 | 3.13585264  | 3.33E-07    | 24.37199744 |
| XAB2         | NM_020196    | 60.73154709 | 4.064666953 | 3.41E-05    | 14.94133413 |
| UBE2D4       | NM_015983    | 102.0422534 | 0.318256101 | 8.34E-14    | 320.6293704 |
| CAPNS1       | NM_001749    | 71.63897248 | 3.600374191 | 1.52E-06    | 19.89764638 |
| RUSC1-AS1    | NM_001039517 | 81.63380273 | 12.6348632  | 9.41E-05    | 6.460996171 |
| POLR2J       | NM_006234    | 55.94352706 | 2.169147534 | 9.53E-06    | 25.79055882 |
| TAX1BP3      | NM_014604    | 112.9496788 | 12.29174965 | 6.05E-08    | 9.189064374 |
| LYRM5        | NM_001001660 | 79.73359767 | 2.769039846 | 7.06E-08    | 28.79467328 |
| RBM15B       | NM_013286    | 46.51751654 | 5.370423465 | 0.00334101  | 8.661796754 |
| SDF2L1       | NM_022044    | 56.93113697 | 3.733930044 | 0.000229737 | 15.24697472 |
| MAP1LC3B     | NM_022818    | 83.53400779 | 1.633977067 | 1.59E-09    | 51.12312128 |
| SPAG5        | NM_006461    | 45.03610167 | 0.024274849 | 8.39E-08    | 1855.257755 |
| POLR2A       | NM_000937    | 202.7531215 | 5.539523929 | 2.02E-18    | 36.60118163 |
| PLCD3        | NM_133373    | 33.70988609 | 0.325517215 | 9.94E-05    | 103.5579213 |
| ATP5B        | NM_001686    | 152.853985  | 2.692233798 | 3.14E-17    | 56.77589558 |
| CHKB         | NM_005198    | 43.62970157 | 1.679536309 | 0.000232445 | 25.97723034 |
| FAM8A1       | NM_016255    | 41.80451128 | 0.379488433 | 2.05E-05    | 110.1601727 |
| LOC101927478 | NR_110630    | 76.77076793 | 0.110258079 | 3.53E-11    | 696.2824718 |
| POLR2E       | NM_002695    | 46.86129196 | 2.935306787 | 0.000706521 | 15.9646999  |
| POR          | NM_000941    | 145.7469697 | 0.66957411  | 1.00E-17    | 217.6711547 |
| HSPA9        | NM_004134    | 41.65448174 | 0.375760957 | 6.56E-06    | 110.8536717 |
| RBM15        | NM_001201545 | 53.13072686 | 1.646219923 | 3.49E-06    | 32.2743797  |
| CLIC3        | NM_004669    | 56.43733202 | 8.018624576 | 0.001862106 | 7.038280877 |
| CASC10       | NM_001010911 | 38.34787658 | 1.426583946 | 0.000809655 | 26.88091135 |
| OXLD1        | NM_001039842 | 64.95074739 | 7.779377021 | 0.000380819 | 8.349093663 |
| RHPN1        | NM_052924    | 117.2438939 | 0.872179261 | 2.78E-15    | 134.4263722 |
| CCND1        | NM_053056    | 112.0370837 | 3.136880505 | 3.40E-11    | 35.71608274 |
| C7orf43      | NM_018275    | 67.91357713 | 7.560640549 | 4.62E-05    | 8.982516322 |
| LIPT2        | NM_001144869 | 139.1337594 | 4.221234672 | 5.02E-13    | 32.96044173 |
| LINC00637    | NR_038436    | 69.81378219 | 2.69233972  | 1.88E-06    | 25.93052492 |
| LOC642852    | NR_026943    | 70.23257238 | 5.046951769 | 1.11E-05    | 13.91583982 |
| JMJD7        | NM_001114632 | 101.0546435 | 2.598790116 | 1.38E-10    | 38.88526544 |
| KRI1         | NM_023008    | 50.24291189 | 4.363696338 | 0.000366486 | 11.51384239 |
| SLC31A2      | NM_001860    | 32.22847122 | 0.132268436 | 5.68E-05    | 243.6595768 |
| THUMP3-AS1   | NR_027007    | 106.8302734 | 4.093371684 | 6.54E-10    | 26.09835649 |
| TUFM         | NM_003321    | 59.74393718 | 7.956202523 | 0.000345049 | 7.509102113 |
| FAM118A      | NM_001104595 | 55.94352706 | 0.730226513 | 5.18E-07    | 76.6111968  |
| CCDC157      | NM_001017437 | 93.94762822 | 1.162657059 | 6.99E-11    | 80.80424702 |
| MED16        | NM_005481    | 52.21813171 | 0.656155612 | 1.39E-06    | 79.58193263 |
| POLR2J3      | NM_001097615 | 66.43216226 | 0.652463202 | 3.12E-08    | 101.817485  |
| EMC8         | NM_006067    | 71.07015275 | 0.804857804 | 3.68E-08    | 88.30150171 |
| GCSH         | NR_033249    | 84.44660293 | 1.036874577 | 2.46E-10    | 81.4434116  |
| FSCN1        | NM_003088    | 195.0772865 | 7.713332815 | 1.96E-17    | 25.29092043 |
| FLOT2        | NM_004475    | 54.53712696 | 1.55677687  | 1.57E-05    | 35.03207687 |
| CCDC97       | NM_052848    | 178.0504557 | 3.182803321 | 1.99E-18    | 55.94139436 |
| HNRNPUL1     | NM_144732    | 29.90947597 | 0.243918765 | 0.001050766 | 122.6206438 |
| LOC646626    | NR_045484    | 65.93835731 | 9.107400695 | 0.000615114 | 7.240085235 |

|                |              |             |             |             |             |
|----------------|--------------|-------------|-------------|-------------|-------------|
| KLHL7-AS1      | NR_046220    | 66.85095245 | 1.424775165 | 1.16E-07    | 46.92035214 |
| PCIF1          | NM_022104    | 129.6327341 | 1.048327972 | 9.39E-16    | 123.6566586 |
| IMPDH2         | NM_000884    | 157.5669903 | 30.95693404 | 2.83E-07    | 5.08987712  |
| EMC10          | NM_206538    | 81.97757815 | 3.254854854 | 1.16E-07    | 25.18624695 |
| A4GALT         | NM_017436    | 40.81690136 | 0.063666616 | 1.95E-06    | 641.1036709 |
| DAK            | NM_015533    | 101.6234632 | 3.796488217 | 1.06E-09    | 26.76775415 |
| TMEM189-UBE2V1 | NM_199203    | 91.62863298 | 1.96485623  | 1.18E-08    | 46.63375955 |
| HIST3H2A       | NM_033445    | 125.3385191 | 21.21542147 | 0.004825115 | 5.907896726 |
| KLF2           | NM_016270    | 73.12038735 | 15.33521912 | 0.001145747 | 4.7681345   |
| EIF4B          | NM_001300821 | 51.64931199 | 0.647889105 | 2.57E-06    | 79.71937109 |
| DIO3           | NM_001362    | 33.70988609 | 1.648384748 | 0.001454926 | 20.45025358 |
| ZNF593         | NM_015871    | 65.51956712 | 10.52766652 | 0.003246914 | 6.223560271 |
| ARHGAP5-AS1    | NR_027263    | 41.72949651 | 1.752411121 | 0.000809655 | 23.81261795 |
| FANCG          | NM_004629    | 49.74910693 | 1.804743956 | 0.000106385 | 27.56574237 |
| OIP5-AS1       | NR_026757    | 89.72842792 | 0.399375682 | 3.23E-12    | 224.6717362 |
| ZNF696         | NM_030895    | 124.2758944 | 3.698563116 | 3.15E-12    | 33.60112846 |
| BOK            | NM_032515    | 43.13589661 | 3.295717277 | 0.000539436 | 13.08846997 |
| ORMDL2         | NM_014182    | 62.55673738 | 2.584173179 | 2.52E-06    | 24.2076413  |
| ATP13A1        | NM_020410    | 48.4177216  | 1.262273088 | 5.78E-05    | 38.35756468 |
| EIF2B1         | NM_001414    | 62.13794719 | 4.125121793 | 2.27E-05    | 15.06330002 |
| MTHFR          | NM_005957    | 60.65653232 | 1.606816628 | 3.99E-06    | 37.749505   |
| AKAP8          | NM_005858    | 88.81583277 | 1.94091438  | 3.92E-09    | 45.75978915 |
| NEAT1          | NR_028272    | 160.9486102 | 30.26452364 | 1.84E-07    | 5.318061904 |
| PDCD5          | NM_004708    | 71.63897248 | 2.824535236 | 2.86E-07    | 25.363101   |
| RSRP1          | NM_020317    | 133.4331443 | 8.514247665 | 8.16E-11    | 15.67174805 |
| SOD1           | NM_000454    | 135.3333493 | 0.938669921 | 5.84E-18    | 144.1756536 |
| RPL23A         | NM_000984    | 105.8426635 | 7.001390988 | 1.05E-08    | 15.11737649 |
| UBAC2-AS1      | NR_036532    | 103.4486535 | 2.312098125 | 5.31E-11    | 44.74232836 |
| SLC8B1         | NM_024959    | 146.1657599 | 2.217583334 | 2.67E-15    | 65.91218363 |
| MED29          | NM_017592    | 109.2242835 | 5.535895023 | 9.79E-10    | 19.73019413 |
| XKR8           | NM_018053    | 55.4497221  | 0.625459301 | 5.49E-07    | 88.65440481 |
| DDA1           | NM_024050    | 32.72227618 | 0.418892777 | 0.000217689 | 78.11611456 |
| PPP1R15A       | NM_014330    | 103.8674437 | 10.0583832  | 5.55E-07    | 10.32645522 |
| TUBG1          | NM_001070    | 60.23774213 | 3.49927242  | 1.13E-05    | 17.21436199 |
| MANF           | NM_006010    | 85.85300303 | 5.897244307 | 2.90E-07    | 14.55815607 |
| NAT9           | NM_015654    | 52.56190713 | 7.30759957  | 0.001059813 | 7.192773308 |
| ADCK5          | NM_174922    | 196.0648964 | 4.118376757 | 2.55E-19    | 47.60732395 |
| TAF5           | NM_006951    | 71.63897248 | 1.142351187 | 8.89E-08    | 62.71186418 |
| SHPK           | NM_013276    | 98.24184329 | 0.640236817 | 1.10E-11    | 153.4461009 |
| NABP2          | NM_024068    | 45.03610167 | 1.932570315 | 0.000213483 | 23.30373251 |
| SSSCA1         | NM_006396    | 42.22330147 | 2.244837453 | 0.000809655 | 18.80906852 |
| CCDC23         | NM_199342    | 60.80656186 | 1.837641456 | 1.40E-06    | 33.08945913 |
| UBQLN2         | NM_013444    | 59.81895195 | 1.293547164 | 1.90E-06    | 46.24412129 |
| LOC101927572   | NM_001290056 | 43.06088184 | 0.808525727 | 3.56E-05    | 53.2585178  |
| ZNF252P-AS1    | NR_026974    | 80.15238786 | 5.036627523 | 1.86E-06    | 15.11390022 |
| GLYR1          | NM_032569    | 70.65136257 | 0.079761848 | 1.61E-11    | 885.7789032 |
| SOCS2-AS1      | NR_038263    | 38.84168154 | 1.562204498 | 0.000191558 | 24.86337837 |
| TMEM63A        | NM_014698    | 48.83651178 | 0.740289506 | 7.55E-06    | 65.96947736 |
| ESAM           | NM_138961    | 72.13277744 | 2.07298634  | 3.30E-07    | 34.79655222 |
| PLD2           | NM_002663    | 80.72120758 | 0.605096906 | 4.12E-10    | 133.402116  |
| MGAT2          | NM_002408    | 95.84783328 | 4.134905438 | 1.29E-08    | 23.18017539 |
| ASF1B          | NM_018154    | 125.7573093 | 5.600512799 | 7.64E-11    | 22.45460617 |
| RPL41          | NM_021104    | 129.5577194 | 22.53692814 | 1.40E-05    | 5.748685825 |
| C10orf10       | NM_007021    | 95.35402832 | 7.370995193 | 6.67E-07    | 12.93638455 |
| LRRC41         | NM_006369    | 51.72432676 | 1.701593339 | 5.56E-05    | 30.39758418 |
| SLC2A1-AS1     | NR_033967    | 29.34065625 | 0.250850847 | 0.000573329 | 116.9645491 |
| BOK-AS1        | NR_033346    | 65.51956712 | 1.76567814  | 5.61E-07    | 37.10731058 |
| SAT2           | NM_133491    | 58.41255184 | 10.01158568 | 0.004636807 | 5.834495527 |
| TMEM101        | NM_032376    | 61.64414223 | 5.247047159 | 8.00E-05    | 11.74834919 |
| NDUFB7         | NM_004146    | 41.23569155 | 4.083331072 | 0.002696539 | 10.0985423  |
| ZNF517         | NM_213605    | 68.82617228 | 2.292853866 | 1.34E-06    | 30.01768813 |
| FTSJ2          | NM_013393    | 42.22330147 | 1.723549499 | 0.000136016 | 24.49787574 |
| CDK4           | NM_000075    | 49.8241217  | 2.986597511 | 0.000140223 | 16.68256989 |
| NFKBIA         | NM_020529    | 104.0174732 | 3.927365356 | 9.21E-10    | 26.48530601 |
| ICMT           | NM_012405    | 61.719157   | 2.799769674 | 2.73E-06    | 22.04436943 |

|               |              |             |             |             |             |
|---------------|--------------|-------------|-------------|-------------|-------------|
| MMP11         | NM_005940    | 21.81485078 | 0.263295769 | 0.002159735 | 82.85302458 |
| C7orf26       | NM_024067    | 47.35509691 | 0.781258253 | 2.74E-05    | 60.61388376 |
| CNPY4         | NM_152755    | 49.25530197 | 2.51885841  | 0.000157391 | 19.55461323 |
| SLC7A6OS      | NM_032178    | 64.95074739 | 0.310846769 | 2.45E-09    | 208.9477961 |
| TAF1D         | NM_024116    | 104.4362634 | 2.437132662 | 1.43E-11    | 42.85210447 |
| RGS2          | NM_002923    | 132.8643245 | 2.635998883 | 2.35E-14    | 50.40378634 |
| WDR45B        | NM_019613    | 72.13277744 | 0.07230095  | 6.27E-12    | 997.6739937 |
| FLJ20021      | NR_033874    | 97.82305311 | 9.62232221  | 2.18E-05    | 10.16635754 |
| EHD2          | NM_014601    | 70.23257238 | 0.882876703 | 1.07E-07    | 79.54969491 |
| CCDC137       | NM_199287    | 125.6822945 | 2.667912035 | 9.29E-14    | 47.10885997 |
| TBL3          | NM_006453    | 38.42289135 | 2.571019128 | 0.003985537 | 14.94461513 |
| TBL2          | NM_012453    | 79.73359767 | 0.190108785 | 3.71E-12    | 419.4103802 |
| MFSD12        | NM_174983    | 78.32719757 | 3.65051054  | 5.84E-07    | 21.45650497 |
| VASN          | NM_138440    | 99.15443844 | 4.845886176 | 1.28E-08    | 20.46156984 |
| USP22         | NM_015276    | 63.05054233 | 1.563089361 | 5.14E-06    | 40.3371323  |
| ATP5D         | NM_001687    | 42.22330147 | 2.603989014 | 0.000292527 | 16.21485392 |
| FAM216A       | NM_013300    | 29.34065625 | 0.101097802 | 0.000173336 | 290.2205165 |
| AK1           | NM_000476    | 40.81690136 | 1.882807456 | 0.000542461 | 21.67874428 |
| ESPL1         | NM_012291    | 35.46006161 | 0.297963124 | 9.94E-05    | 119.008222  |
| ARC           | NM_015193    | 135.8271543 | 10.74772985 | 2.87E-10    | 12.63775292 |
| PEX6          | NM_000287    | 71.63897248 | 5.660524399 | 5.28E-06    | 12.65588971 |
| RNF223        | NM_001205252 | 62.13794719 | 3.013089336 | 1.13E-05    | 20.62267005 |
| TUSC2         | NM_007275    | 45.45489186 | 0.668807114 | 1.63E-05    | 67.96412733 |
| BIK           | NM_001197    | 64.60697198 | 3.320747249 | 1.43E-05    | 19.45555236 |
| DDRGK1        | NM_023935    | 91.05981325 | 2.096671143 | 3.78E-10    | 43.43066082 |
| GIN54         | NM_032336    | 102.5360584 | 0.233970209 | 3.31E-15    | 438.2440765 |
| STAG3L2       | NR_040584    | 77.83339261 | 1.305448781 | 1.34E-08    | 59.62194284 |
| TOR4A         | NM_017723    | 42.1482867  | 2.845069091 | 0.000697854 | 14.81450374 |
| WBSCR27       | NM_152559    | 97.32924815 | 2.666887537 | 1.71E-10    | 36.49544528 |
| POFUT1        | NM_172236    | 81.13999777 | 0.52612799  | 4.29E-11    | 154.2210247 |
| KPNA2         | NM_002266    | 128.9888996 | 1.998710449 | 1.10E-14    | 64.53606111 |
| LOC646719     | NR_046262    | 111.5432787 | 2.688480777 | 3.08E-12    | 41.48933467 |
| NDUFA6        | NM_002490    | 45.52990662 | 4.850382812 | 0.002570626 | 9.386868705 |
| TUBB6         | NM_032525    | 79.73359767 | 2.503785958 | 3.26E-08    | 31.84521321 |
| NOP56         | NR_027700    | 121.044304  | 14.15634921 | 8.66E-08    | 8.550531086 |
| BNIP3         | NM_004052    | 42.22330147 | 0.158136153 | 6.35E-07    | 267.0059982 |
| ENO2          | NM_001975    | 22.30865574 | 0.5214304   | 0.003328097 | 42.7835733  |
| C16orf58      | NM_022744    | 32.22847122 | 0.043291381 | 2.87E-05    | 744.454681  |
| CRTC2         | NM_181715    | 39.41050126 | 0.723231195 | 0.000162048 | 54.49225855 |
| C1QBP         | NM_001212    | 91.55361821 | 1.361562285 | 3.44E-11    | 67.24159389 |
| DHRS11        | NM_024308    | 51.72432676 | 2.775429412 | 0.000156653 | 18.63651316 |
| MED19         | NM_153450    | 54.46211219 | 0.876851386 | 1.12E-06    | 62.11099517 |
| PRDX2         | NM_005809    | 104.9300684 | 11.67811817 | 2.88E-07    | 8.985186385 |
| ADM           | NM_001124    | 126.326129  | 10.89891494 | 1.27E-08    | 11.59070693 |
| TMEM43        | NM_024334    | 34.62248123 | 1.249872346 | 0.002652489 | 27.70081388 |
| MAF1          | NM_032272    | 63.05054233 | 5.985063125 | 7.24E-05    | 10.53464951 |
| PCGF3         | NM_006315    | 43.62970157 | 0.511427254 | 4.79E-05    | 85.30969209 |
| SNHG6         | NR_002599    | 123.2882845 | 8.567962053 | 1.51E-09    | 14.38945267 |
| MT2A          | NM_005953    | 69.1699477  | 10.41513819 | 0.003700318 | 6.641289483 |
| CALR          | NM_004343    | 168.1306403 | 6.066556727 | 2.54E-16    | 27.71434404 |
| OTX1          | NM_001199770 | 51.72432676 | 6.413041159 | 0.001232715 | 8.065491157 |
| RPS3A         | NM_001267699 | 93.03503308 | 3.191199649 | 4.73E-09    | 29.1536235  |
| SMIM4         | NM_001124767 | 149.1285897 | 8.039997563 | 1.29E-12    | 18.54833767 |
| MOAP1         | NM_022151    | 93.52883803 | 1.91789567  | 6.73E-10    | 48.7663847  |
| SCAND2P       | NR_003654    | 32.22847122 | 1.891343018 | 0.00498304  | 17.03999269 |
| FAM210B       | NM_080821    | 28.50307587 | 0.569244577 | 0.00342028  | 50.07175651 |
| SPCS1         | NM_014041    | 57.91874689 | 11.11240039 | 0.003865474 | 5.212082435 |
| PCSK7         | NM_004716    | 53.62453181 | 0.187392146 | 4.29E-08    | 286.1621088 |
| FOSB          | NM_001114171 | 70.72637734 | 2.652350881 | 3.30E-07    | 26.66554333 |
| DKFZP434I0714 | NR_033797    | 55.94352706 | 0.66142051  | 1.43E-06    | 84.58087741 |
| FBXO46        | NM_001080469 | 41.23569155 | 1.277742248 | 0.000666492 | 32.27230814 |
| PYURF         | NM_032906    | 97.25423338 | 1.108168528 | 5.16E-11    | 87.76123028 |
| THOC3         | NM_032361    | 95.84783328 | 0.265853971 | 3.95E-15    | 360.5281234 |
| FAM102A       | NM_001035254 | 51.64931199 | 1.009856879 | 5.29E-05    | 51.14518011 |
| H3F3B         | NM_005324    | 196.4836866 | 24.19368859 | 1.94E-11    | 8.121278649 |

|              |              |             |             |             |             |
|--------------|--------------|-------------|-------------|-------------|-------------|
| TYMSOS       | NM_001012716 | 76.42699251 | 2.36752856  | 7.98E-08    | 32.2813392  |
| NUDT16L1     | NM_032349    | 63.54434729 | 5.803473086 | 0.000108336 | 10.94936538 |
| RPL11        | NM_000975    | 60.23774213 | 3.110945536 | 2.75E-05    | 19.36316192 |
| RNMTL1       | NM_018146    | 57.91874689 | 3.773881879 | 6.29E-05    | 15.34726013 |
| VPS4A        | NM_013245    | 69.73876742 | 5.8837394   | 4.35E-05    | 11.85279678 |
| B4GALT7      | NM_007255    | 73.04537258 | 3.584290413 | 7.08E-07    | 20.37931199 |
| BFAR         | NM_016561    | 25.54024613 | 0.992937861 | 0.004895542 | 25.72189774 |
| TXNDC17      | NM_032731    | 94.44143318 | 9.23906707  | 1.05E-06    | 10.2219664  |
| SARS         | NR_034072    | 51.57429722 | 2.295855969 | 2.52E-05    | 22.46408221 |
| DKK1         | NM_012242    | 132.4455343 | 0.692729982 | 4.59E-17    | 191.193593  |
| ITFG2        | NM_018463    | 89.65341315 | 0.402788747 | 1.76E-12    | 222.5817229 |
| TUBB2A       | NM_001069    | 114.4310937 | 6.549759834 | 1.80E-09    | 17.47103658 |
| SAPCD2       | NM_178448    | 82.62141264 | 4.969849677 | 5.19E-07    | 16.62452952 |
| MAP3K14      | NM_003954    | 53.62453181 | 2.751343441 | 6.80E-05    | 19.49030827 |
| SIX5         | NM_175875    | 40.32309641 | 3.859865145 | 0.001920241 | 10.44676301 |
| TOE1         | NM_025077    | 90.64102306 | 10.07351231 | 3.84E-06    | 8.997956248 |
| COX6A1       | NM_004373    | 64.95074739 | 1.188736903 | 1.41E-07    | 54.63845467 |
| MYH7B        | NM_020884    | 62.13794719 | 1.731915045 | 6.17E-06    | 35.87817276 |
| C19orf24     | NM_017914    | 97.82305311 | 15.19910047 | 1.68E-05    | 6.436108063 |
| ATG2A        | NM_015104    | 96.76042842 | 0.26933619  | 1.32E-13    | 359.2552058 |
| LDLRAP1      | NM_015627    | 93.03503308 | 1.972289095 | 7.74E-10    | 47.17109338 |
| IDII         | NM_004508    | 96.34163824 | 2.297651801 | 1.71E-10    | 41.93047798 |
| FAM86DP      | NR_024241    | 59.32514699 | 0.389937094 | 7.13E-08    | 152.1403012 |
| ARL2-SNX15   | NR_037650    | 46.02371158 | 0.564929009 | 7.43E-06    | 81.46813286 |
| LOC101559451 | NR_103482    | 44.54229671 | 4.754322942 | 0.003381947 | 9.368799144 |
| IRF1         | NM_002198    | 133.9269492 | 0.70809309  | 1.26E-18    | 189.1374893 |
| HIST2H2BE    | NM_003528    | 104.8550536 | 24.99846241 | 0.000219404 | 4.194460119 |
| ZNF740       | NM_001004304 | 38.91669631 | 1.209386264 | 0.000283421 | 32.1788807  |
| HNRNPA0      | NM_006805    | 104.9300684 | 5.28962089  | 3.20E-09    | 19.83697331 |
| TMSB4X       | NM_021109    | 68.33236732 | 3.487148418 | 5.40E-06    | 19.5954858  |
| RNF123       | NM_022064    | 66.01337208 | 3.933943016 | 2.68E-05    | 16.78045966 |
| FLJ36777     | NR_027441    | 73.12038735 | 3.651251215 | 1.17E-06    | 20.02611791 |
| CBX6         | NM_014292    | 47.50512645 | 1.134720075 | 1.24E-05    | 41.86506215 |
| RNASEH2A     | NM_006397    | 71.14516752 | 0.422009408 | 2.79E-10    | 168.586686  |
| C19orf43     | NM_024038    | 96.83544319 | 3.028049738 | 7.81E-10    | 31.97947576 |
| PDAP1        | NM_014891    | 48.83651178 | 5.653758896 | 0.000863468 | 8.637883696 |
| TEFM         | NM_024683    | 65.86334254 | 0.6902972   | 8.70E-09    | 95.41302283 |
| VPS25        | NM_032353    | 79.16477794 | 4.930232988 | 5.31E-07    | 16.05700545 |
| FADD         | NM_003824    | 46.44250177 | 5.491826958 | 0.002272915 | 8.456657889 |
| RPS8         | NM_001012    | 121.9568991 | 11.54399967 | 1.08E-08    | 10.56452726 |
| RPL35        | NM_007209    | 68.67614274 | 4.858476625 | 1.73E-05    | 14.13532431 |
| KLC3         | NM_177417    | 36.94147648 | 3.062405992 | 0.001625779 | 12.06289322 |
| BOP1         | NM_015201    | 69.31997724 | 0.916264855 | 2.47E-07    | 75.65495597 |
| TEN1         | NM_001113324 | 58.75632726 | 0.862145317 | 1.40E-06    | 68.15130364 |
| NRBP1        | NM_013392    | 99.22945321 | 2.370109404 | 3.87E-10    | 41.86703494 |
| KIAA0895L    | NM_001040715 | 56.43733202 | 8.736582229 | 0.001520115 | 6.459886777 |
| INTS6-AS1    | NR_103812    | 88.740818   | 12.84221038 | 0.00012112  | 6.910089105 |
| TUBG2        | NM_016437    | 96.26662347 | 4.288636075 | 6.08E-09    | 22.44690894 |
| YY1          | NM_003403    | 31.80968103 | 0.356432895 | 0.000552411 | 89.24451551 |
| NTSR1        | NM_002531    | 42.22330147 | 2.375321806 | 0.000823529 | 17.77582362 |
| NAGLU        | NM_000263    | 31.73466626 | 0.336341551 | 0.000770788 | 94.35250011 |
| GBA2         | NM_020944    | 72.55156763 | 4.309625528 | 2.80E-06    | 16.83477303 |
| TSTA3        | NM_003313    | 78.2521828  | 4.564367562 | 5.30E-07    | 17.14414576 |
| PHF13        | NM_153812    | 27.51546596 | 0.348304142 | 0.000265346 | 78.99838862 |
| RRP7B        | NR_002184    | 77.33958766 | 2.486467492 | 9.06E-08    | 31.10420221 |
| RPL18A       | NM_000980    | 89.65341315 | 4.792007283 | 1.60E-07    | 18.7089476  |
| RBM3         | NM_006743    | 33.21608113 | 2.327153013 | 0.001869146 | 14.27326907 |
| LINC00662    | NR_027301    | 59.74393718 | 0.207854248 | 3.05E-08    | 287.431879  |
| LSM7         | NM_016199    | 56.93113697 | 0.629522457 | 1.18E-07    | 90.43543462 |
| TXNL4A       | NM_006701    | 61.719157   | 0.395821446 | 3.94E-08    | 155.9267636 |
| RPS12        | NM_001016    | 162.4300251 | 12.3154448  | 3.46E-12    | 13.18913184 |
| C19orf10     | NM_019107    | 22.23364097 | 0.659902308 | 0.004785512 | 33.6923219  |
| GFER         | NM_005262    | 75.51439737 | 8.937226132 | 3.73E-05    | 8.449422254 |
| FAM127A      | NM_001078171 | 87.40943267 | 4.208254196 | 6.05E-07    | 20.77094885 |
| ORAI3        | NM_152288    | 47.92391664 | 7.303343502 | 0.002061246 | 6.561914639 |



|              |              |             |             |             |             |
|--------------|--------------|-------------|-------------|-------------|-------------|
| DCPS         | NM_014026    | 117.7376988 | 0.579024329 | 5.82E-14    | 203.3380862 |
| LINC00896    | NR_026919    | 56.51234679 | 5.761604905 | 0.000501766 | 9.808438398 |
| PGAM1        | NM_002629    | 60.73154709 | 2.238991233 | 6.43E-06    | 27.12451313 |
| ANKRD52      | NM_173595    | 71.63897248 | 0.661217549 | 1.70E-08    | 108.3440277 |
| ETHE1        | NM_014297    | 136.7397494 | 1.713620457 | 6.28E-16    | 79.79581994 |
| LOC284080    | NR_038230    | 96.26662347 | 8.068823293 | 2.83E-07    | 11.93068927 |
| PLK3         | NM_004073    | 128.1513193 | 4.629490307 | 1.42E-12    | 27.681518   |
| ELOF1        | NM_032377    | 88.66580323 | 2.741252539 | 7.90E-09    | 32.34499631 |
| DNAJB2       | NM_001039550 | 56.01854183 | 2.045024544 | 1.48E-05    | 27.39260123 |
| S100A11      | NM_005620    | 58.41255184 | 1.47952002  | 2.15E-06    | 39.48074448 |
| RPS25        | NM_001028    | 76.92079747 | 3.40199213  | 7.76E-07    | 22.61051599 |
| KCNG1        | NM_002237    | 153.8415949 | 1.729811992 | 2.83E-17    | 88.93544249 |
| TRIM8        | NM_030912    | 23.5650263  | 0.394214068 | 0.003328097 | 59.77723331 |
| LOC100506100 | NR_046240    | 22.72744593 | 0.316505169 | 0.002159735 | 71.80750323 |
| WDR83OS      | NM_016145    | 121.044304  | 22.5946734  | 1.97E-05    | 5.357205295 |
| NDUFA1       | NM_004541    | 43.62970157 | 0.399931294 | 7.16E-06    | 109.0929923 |
| KAZALD1      | NM_030929    | 93.87261345 | 10.72648067 | 2.29E-06    | 8.751483019 |
| NUFIP2       | NM_020772    | 147.2283846 | 0.507216026 | 3.26E-19    | 290.2676117 |
| MROH6        | NM_001100878 | 63.46933252 | 14.77218433 | 0.003993912 | 4.296543497 |
| SOX9         | NM_000346    | 110.0618638 | 1.626527037 | 2.56E-13    | 67.66679024 |
| ZSCAN16      | NM_025231    | 39.26047172 | 0.620890641 | 3.70E-05    | 63.23250687 |
| SNHG11       | NR_003239    | 76.42699251 | 4.551386512 | 1.64E-06    | 16.79202421 |
| CHAC2        | NM_001008708 | 61.22535205 | 0.726244478 | 7.13E-08    | 84.30405172 |
| PNRC2        | NM_017761    | 92.61624289 | 0.659976981 | 3.92E-12    | 140.3325351 |
| SPC24        | NM_182513    | 57.34992716 | 2.767074436 | 3.18E-05    | 20.72583463 |
| HINT2        | NM_032593    | 50.66170207 | 0.917981731 | 1.09E-05    | 55.18813756 |
| RPL39        | NM_001000    | 65.51956712 | 2.630687075 | 8.21E-07    | 24.90587639 |
| ARPC4-TTLL3  | NM_001198793 | 54.043322   | 1.120108263 | 3.15E-05    | 48.24830224 |
| LRRC47       | NM_020710    | 81.7088175  | 0.130841209 | 1.25E-12    | 624.4883998 |
| GBAP1        | NR_002188    | 94.86022337 | 1.697449557 | 6.99E-11    | 55.88397191 |
| PISD         | NM_014338    | 38.91669631 | 3.793849723 | 0.004330814 | 10.25783812 |
| TMEM180      | NM_024789    | 45.45489186 | 4.639723891 | 0.001550731 | 9.796895877 |
